# Supplementary material for: Investigating the Human Intestinal DNA Virome and Predicting Disease-Associated Virus–Host Interactions in Severe Myalgic Encephalomyelitis/Chronic Fatigue Syndrome (ME/CFS)
Source: MDPI journal article supplement (doi:10.3390/ijms242417267), 2023-12-08
Supplement: s1 [file s1]

**Table S8-1. WMS\_rival\_cluster\_overv**

[illegible]



|               |     |            |            |           |            |            |            |      |      |            |            |                                                         |                             |   |   |
|---------------|-----|------------|------------|-----------|------------|------------|------------|------|------|------------|------------|---------------------------------------------------------|-----------------------------|---|---|
| 13C_VIC_110   | 2   | 11.855803  | 6.525744   | 6.644626  | 0.144233   | 7.01706782 | 7.01706782 | 1    | 1    | 7.01706782 | 0          | 0                                                       | K30835135-wm-combined_23565 | 0 |   |
| 13C_VIC_110   | 4   | 136.339875 | 6.525744   | 6.644626  | 1.274235   | 0          | 0          | 6    | 6    | 0          | 0          | 0.0884723213311450136792883460                          | 0                           |   |   |
| 13C_VIC_110   | 6   | 136.339877 | 10.633522  | 11.605198 | 1.000210   | 0          | 0          | 1    | 1    | 1.7505464  | 0          | 0.00051138105211405213488877438005781326113134313200771 | 0                           |   |   |
| 13C_VIC_111   | 0   | 15.5339702 | 6.525744   | 6.644626  | 0.1550067  | 0          | 0          | 1    | 1    | 0          | 0          | 0.003684047135262                                       | 0                           |   |   |
| 13C_VIC_112   | 2   | 4.26339794 | 20.474477  | 6.525744  | 0.7626452  | 1.73250688 | 1.73250688 | 1    | 1    | 1.73250688 | 0          | 0.003684047135262                                       | 0                           |   |   |
| 13C_VIC_112   | 4   | 116.830768 | 0          | 0         | 0          | 0          | 0          | 1    | 1    | 0          | 0          | 0.003684047135262                                       | 0                           |   |   |
| 13C_VIC_112   | 6   | 116.830768 | 0          | 0         | 0          | 0          | 0          | 1    | 1    | 0          | 0          | 0.003684047135262                                       | 0                           |   |   |
| 13C_VIC_113   | 0   | 8.9202166  | 115.89545  | 6.073481  | 0.6275944  | 0          | 0          | 1    | 1    | 1.43421376 | 0          | 0.003684047135262                                       | 0                           |   |   |
| 13C_VIC_113   | 2   | 88.984381  | 258.722044 | 6.7627496 | 2.21626    | 0.22666977 | 91         | 91   | 91   | 1.53579558 | 0          | 0.003684047135262                                       | 0                           |   |   |
| 13C_VIC_113   | 4   | 116.830768 | 0          | 0         | 0          | 0          | 0          | 1    | 1    | 0          | 0          | 0.003684047135262                                       | 0                           |   |   |
| 13C_VIC_113   | 6   | 115.52751  | 55.855278  | 6.073481  | 0.6275944  | 0          | 0          | 1    | 1    | 1.43421376 | 0          | 0.003684047135262                                       | 0                           |   |   |
| 13C_VIC_113_0 | 1   | 400002.087 | 1984.2951  | 0.9586507 | 0          | 0          | 7.65773708 | 4095 | 4095 | 0          | 1.63306909 | 0                                                       | 0                           | 0 |   |
| 13C_VIC_113_0 | 2   | 136.782178 | 386.206318 | 6.2697891 | 0.60913136 | 0          | 0          | 2    | 21   | 21         | 1          | 1.5584347                                               | 0                           | 0 | 0 |
| 13C_VIC_113_0 | 4   | 174.484314 | 271.11212  | 6.073481  | 0.6275944  | 0          | 0          | 1    | 1    | 1.43421376 | 0          | 0.003684047135262                                       | 0                           | 0 | 0 |
| 13C_VIC_113_0 | 6   | 25.597584  | 0.4252964  | 0.1357931 | 0.00792732 | 0          | 0          | 1    | 1    | 0          | 0          | 0                                                       | 0                           | 0 | 0 |
| 13C_VIC_113_0 | 8   | 25.597584  | 401.711776 | 0.103121  | 0          | 0          | 0          | 1    | 1    | 0          | 0          | 0                                                       | 0                           | 0 | 0 |
| 13C_VIC_113_0 | 10  | 187.36026  | 147.077796 | 6.5509129 | 2.34835    | 0          | 0          | 1    | 1    | 1.7780251  | 0          | 0                                                       | 0                           | 0 | 0 |
| 13C_VIC_113_0 | 12  | 25.597584  | 990.127594 | 0.103121  | 0          | 0          | 0          | 1    | 1    | 1.7780251  | 0          | 0                                                       | 0                           | 0 | 0 |
| 13C_VIC_113_0 | 14  | 136.782178 | 1128.3572  | 0.1357931 | 0.00792732 | 0          | 0          | 1    | 1    | 1.43421376 | 0          | 0.003684047135262                                       | 0                           | 0 | 0 |
| 13C_VIC_113_0 | 16  | 136.782178 | 1128.3572  | 0.1357931 | 0.00792732 | 0          | 0          | 1    | 1    | 1.43421376 | 0          | 0.003684047135262                                       | 0                           | 0 | 0 |
| 13C_VIC_113_0 | 18  | 136.782178 | 1128.3572  | 0.1357931 | 0.00792732 | 0          | 0          | 1    | 1    | 1.43421376 | 0          | 0.003684047135262                                       | 0                           | 0 | 0 |
| 13C_VIC_113_0 | 20  | 136.782178 | 1128.3572  | 0.1357931 | 0.00792732 | 0          | 0          | 1    | 1    | 1.43421376 | 0          | 0.003684047135262                                       | 0                           | 0 | 0 |
| 13C_VIC_113_0 | 22  | 136.782178 | 1128.3572  | 0.1357931 | 0.00792732 | 0          | 0          | 1    | 1    | 1.43421376 | 0          | 0.003684047135262                                       | 0                           | 0 | 0 |
| 13C_VIC_113_0 | 24  | 136.782178 | 1128.3572  | 0.1357931 | 0.00792732 | 0          | 0          | 1    | 1    | 1.43421376 | 0          | 0.003684047135262                                       | 0                           | 0 | 0 |
| 13C_VIC_113_0 | 26  | 136.782178 | 1128.3572  | 0.1357931 | 0.00792732 | 0          | 0          | 1    | 1    | 1.43421376 | 0          | 0.003684047135262                                       | 0                           | 0 | 0 |
| 13C_VIC_113_0 | 28  | 136.782178 | 1128.3572  | 0.1357931 | 0.00792732 | 0          | 0          | 1    | 1    | 1.43421376 | 0          | 0.003684047135262                                       | 0                           | 0 | 0 |
| 13C_VIC_113_0 | 30  | 136.782178 | 1128.3572  | 0.1357931 | 0.00792732 | 0          | 0          | 1    | 1    | 1.43421376 | 0          | 0.003684047135262                                       | 0                           | 0 | 0 |
| 13C_VIC_113_0 | 32  | 136.782178 | 1128.3572  | 0.1357931 | 0.00792732 | 0          | 0          | 1    | 1    | 1.43421376 | 0          | 0.003684047135262                                       | 0                           | 0 | 0 |
| 13C_VIC_113_0 | 34  | 136.782178 | 1128.3572  | 0.1357931 | 0.00792732 | 0          | 0          | 1    | 1    | 1.43421376 | 0          | 0.003684047135262                                       | 0                           | 0 | 0 |
| 13C_VIC_113_0 | 36  | 136.782178 | 1128.3572  | 0.1357931 | 0.00792732 | 0          | 0          | 1    | 1    | 1.43421376 | 0          | 0.003684047135262                                       | 0                           | 0 | 0 |
| 13C_VIC_113_0 | 38  | 136.782178 | 1128.3572  | 0.1357931 | 0.00792732 | 0          | 0          | 1    | 1    | 1.43421376 | 0          | 0.003684047135262                                       | 0                           | 0 | 0 |
| 13C_VIC_113_0 | 40  | 136.782178 | 1128.3572  | 0.1357931 | 0.00792732 | 0          | 0          | 1    | 1    | 1.43421376 | 0          | 0.003684047135262                                       | 0                           | 0 | 0 |
| 13C_VIC_113_0 | 42  | 136.782178 | 1128.3572  | 0.1357931 | 0.00792732 | 0          | 0          | 1    | 1    | 1.43421376 | 0          | 0.003684047135262                                       | 0                           | 0 | 0 |
| 13C_VIC_113_0 | 44  | 136.782178 | 1128.3572  | 0.1357931 | 0.00792732 | 0          | 0          | 1    | 1    | 1.43421376 | 0          | 0.003684047135262                                       | 0                           | 0 | 0 |
| 13C_VIC_113_0 | 46  | 136.782178 | 1128.3572  | 0.1357931 | 0.00792732 | 0          | 0          | 1    | 1    | 1.43421376 | 0          | 0.003684047135262                                       | 0                           | 0 | 0 |
| 13C_VIC_113_0 | 48  | 136.782178 | 1128.3572  | 0.1357931 | 0.00792732 | 0          | 0          | 1    | 1    | 1.43421376 | 0          | 0.003684047135262                                       | 0                           | 0 | 0 |
| 13C_VIC_113_0 | 50  | 136.782178 | 1128.3572  | 0.1357931 | 0.00792732 | 0          | 0          | 1    | 1    | 1.43421376 | 0          | 0.003684047135262                                       | 0                           | 0 | 0 |
| 13C_VIC_113_0 | 52  | 136.782178 | 1128.3572  | 0.1357931 | 0.00792732 | 0          | 0          | 1    | 1    | 1.43421376 | 0          | 0.003684047135262                                       | 0                           | 0 | 0 |
| 13C_VIC_113_0 | 54  | 136.782178 | 1128.3572  | 0.1357931 | 0.00792732 | 0          | 0          | 1    | 1    | 1.43421376 | 0          | 0.003684047135262                                       | 0                           | 0 | 0 |
| 13C_VIC_113_0 | 56  | 136.782178 | 1128.3572  | 0.1357931 | 0.00792732 | 0          | 0          | 1    | 1    | 1.43421376 | 0          | 0.003684047135262                                       | 0                           | 0 | 0 |
| 13C_VIC_113_0 | 58  | 136.782178 | 1128.3572  | 0.1357931 | 0.00792732 | 0          | 0          | 1    | 1    | 1.43421376 | 0          | 0.003684047135262                                       | 0                           | 0 | 0 |
| 13C_VIC_113_0 | 60  | 136.782178 | 1128.3572  | 0.1357931 | 0.00792732 | 0          | 0          | 1    | 1    | 1.43421376 | 0          | 0.003684047135262                                       | 0                           | 0 | 0 |
| 13C_VIC_113_0 | 62  | 136.782178 | 1128.3572  | 0.1357931 | 0.00792732 | 0          | 0          | 1    | 1    | 1.43421376 | 0          | 0.003684047135262                                       | 0                           | 0 | 0 |
| 13C_VIC_113_0 | 64  | 136.782178 | 1128.3572  | 0.1357931 | 0.00792732 | 0          | 0          | 1    | 1    | 1.43421376 | 0          | 0.003684047135262                                       | 0                           | 0 | 0 |
| 13C_VIC_113_0 | 66  | 136.782178 | 1128.3572  | 0.1357931 | 0.00792732 | 0          | 0          | 1    | 1    | 1.43421376 | 0          | 0.003684047135262                                       | 0                           | 0 | 0 |
| 13C_VIC_113_0 | 68  | 136.782178 | 1128.3572  | 0.1357931 | 0.00792732 | 0          | 0          | 1    | 1    | 1.43421376 | 0          | 0.003684047135262                                       | 0                           | 0 | 0 |
| 13C_VIC_113_0 | 70  | 136.782178 | 1128.3572  | 0.1357931 | 0.00792732 | 0          | 0          | 1    | 1    | 1.43421376 | 0          | 0.003684047135262                                       | 0                           | 0 | 0 |
| 13C_VIC_113_0 | 72  | 136.782178 | 1128.3572  | 0.1357931 | 0.00792732 | 0          | 0          | 1    | 1    | 1.43421376 | 0          | 0.003684047135262                                       | 0                           | 0 | 0 |
| 13C_VIC_113_0 | 74  | 136.782178 | 1128.3572  | 0.1357931 | 0.00792732 | 0          | 0          | 1    | 1    | 1.43421376 | 0          | 0.003684047135262                                       | 0                           | 0 | 0 |
| 13C_VIC_113_0 | 76  | 136.782178 | 1128.3572  | 0.1357931 | 0.00792732 | 0          | 0          | 1    | 1    | 1.43421376 | 0          | 0.003684047135262                                       | 0                           | 0 | 0 |
| 13C_VIC_113_0 | 78  | 136.782178 | 1128.3572  | 0.1357931 | 0.00792732 | 0          | 0          | 1    | 1    | 1.43421376 | 0          | 0.003684047135262                                       | 0                           | 0 | 0 |
| 13C_VIC_113_0 | 80  | 136.782178 | 1128.3572  | 0.1357931 | 0.00792732 | 0          | 0          | 1    | 1    | 1.43421376 | 0          | 0.003684047135262                                       | 0                           | 0 | 0 |
| 13C_VIC_113_0 | 82  | 136.782178 | 1128.3572  | 0.1357931 | 0.00792732 | 0          | 0          | 1    | 1    | 1.43421376 | 0          | 0.003684047135262                                       | 0                           | 0 | 0 |
| 13C_VIC_113_0 | 84  | 136.782178 | 1128.3572  | 0.1357931 | 0.00792732 | 0          | 0          | 1    | 1    | 1.43421376 | 0          | 0.003684047135262                                       | 0                           | 0 | 0 |
| 13C_VIC_113_0 | 86  | 136.782178 | 1128.3572  | 0.1357931 | 0.00792732 | 0          | 0          | 1    | 1    | 1.43421376 | 0          | 0.003684047135262                                       | 0                           | 0 | 0 |
| 13C_VIC_113_0 | 88  | 136.782178 | 1128.3572  | 0.1357931 | 0.00792732 | 0          | 0          | 1    | 1    | 1.43421376 | 0          | 0.003684047135262                                       | 0                           | 0 | 0 |
| 13C_VIC_113_0 | 90  | 136.782178 | 1128.3572  | 0.1357931 | 0.00792732 | 0          | 0          | 1    | 1    | 1.43421376 | 0          | 0.003684047135262                                       | 0                           | 0 | 0 |
| 13C_VIC_113_0 | 92  | 136.782178 | 1128.3572  | 0.1357931 | 0.00792732 | 0          | 0          | 1    | 1    | 1.43421376 | 0          | 0.003684047135262                                       | 0                           | 0 | 0 |
| 13C_VIC_113_0 | 94  | 136.782178 | 1128.3572  | 0.1357931 | 0.00792732 | 0          | 0          | 1    | 1    | 1.43421376 | 0          | 0.003684047135262                                       | 0                           | 0 | 0 |
| 13C_VIC_113_0 | 96  | 136.782178 | 1128.3572  | 0.1357931 | 0.00792732 | 0          | 0          | 1    | 1    | 1.43421376 | 0          | 0.003684047135262                                       | 0                           | 0 | 0 |
| 13C_VIC_113_0 | 98  | 136.782178 | 1128.3572  | 0.1357931 | 0.00792732 | 0          | 0          | 1    | 1    | 1.43421376 | 0          | 0.003684047135262                                       | 0                           | 0 | 0 |
| 13C_VIC_113_0 | 100 | 136.782178 | 1128.3572  | 0.1357931 | 0.00792732 | 0          | 0          | 1    | 1    | 1.43421376 | 0          | 0.003684047135262                                       | 0                           | 0 | 0 |
| 13C_VIC_113_0 | 102 | 136.782178 | 1128.3572  | 0.1357931 | 0.00792732 | 0          | 0          | 1    | 1    | 1.43421376 | 0          | 0.003684047135262                                       | 0                           | 0 | 0 |
| 13C_VIC_113_0 | 104 | 136.782178 | 1128.3572  | 0.1357931 | 0.00792732 | 0          | 0          | 1    | 1    | 1.43421376 | 0          | 0.003684047135262                                       | 0                           | 0 | 0 |
| 13C_VIC_113_0 | 106 | 136.782178 | 1128.3572  | 0.1357931 | 0.00792732 | 0          | 0          | 1    | 1    | 1.43421376 | 0          | 0.003684047135262                                       | 0                           | 0 | 0 |
| 13C_VIC_113_0 | 108 | 136.782178 | 1128.3572  | 0.1357931 | 0.00792732 | 0          | 0          | 1    | 1    | 1.43421376 | 0          | 0.003684047135262                                       | 0                           | 0 | 0 |
| 13C_VIC_113_0 | 110 | 136.782178 | 1128.3572  | 0.1357931 | 0.00792732 | 0          | 0          | 1    | 1    | 1.43421376 | 0          | 0.003684047135262                                       | 0                           | 0 | 0 |
| 13C_VIC_113_0 | 112 | 136.782178 | 1128.3572  | 0.1357931 | 0.00792732 | 0          | 0          | 1    | 1    | 1.43421376 | 0          | 0.003684047135262                                       | 0                           | 0 | 0 |
| 13C_VIC_113_0 | 114 | 136.782178 | 1128.3572  | 0.1357931 | 0.00792732 | 0          | 0          | 1    | 1    | 1.43421376 | 0          | 0.003684047135262                                       | 0                           | 0 | 0 |
| 13C_VIC_113_0 | 116 | 136.782178 | 1128.3572  | 0.1357931 | 0.00792732 | 0          | 0          | 1    | 1    | 1.43421376 | 0          | 0.003684047135262                                       | 0                           | 0 | 0 |
| 13C_VIC_113_0 | 118 | 136.782178 | 1128.3572  | 0.1357931 | 0.00792732 | 0          | 0          | 1    | 1    | 1.43421376 | 0          | 0.003684047135262                                       | 0                           | 0 | 0 |
| 13C_VIC_113_0 | 120 | 136.782178 | 1128.3572  | 0.1357931 | 0.00792732 | 0          | 0          | 1    | 1    | 1.43421376 | 0          | 0.003684047135262                                       | 0                           | 0 | 0 |
| 13C_VIC_113_0 | 122 | 136.782178 | 1128.3572  | 0.1357931 | 0.00792732 | 0          | 0          | 1    | 1    | 1.43421376 | 0          | 0.003684047135262                                       | 0                           | 0 | 0 |
| 13C_VIC_113_0 | 124 | 136.782178 | 1128.3572  | 0.1357931 | 0.00792732 | 0          | 0          | 1    | 1    | 1.43421376 | 0          | 0.003684047135262                                       | 0                           | 0 | 0 |
| 13C_VIC_113_0 | 126 | 136.782178 | 1128.3572  | 0.1357931 | 0.00792732 | 0          | 0          | 1    | 1    | 1.43421376 | 0          | 0.00368                                                 |                             |   |   |



[illegible]



[illegible]







[illegible]



[illegible]



[illegible]



[illegible]



[illegible]











[illegible]



[illegible]



















|               |    |             |             |             |              |            |            |     |             |            |      |     |   |   |    |             |
|---------------|----|-------------|-------------|-------------|--------------|------------|------------|-----|-------------|------------|------|-----|---|---|----|-------------|
| 2317_VC_26,0  | 1  | 0           | 206.255695  | 0           | 0            | 0          | 0          | 1   | 1           | 1          | 0    | 0   | 0 | 0 | 1  | LC397460    |
| 2318_VC_26,1  | 1  | 0           | 319.570068  | 0           | 0            | 0          | 0          | 0   | 0           | 0          | 0    | 0   | 0 | 0 | 0  | 03404642    |
| 2319_VC_26,2  | 1  | 0           | 115.677985  | 0           | 0            | 0          | 0          | 0   | 0           | 0          | 0    | 0   | 0 | 0 | 0  | 03983621    |
| 2320_VC_26,3  | 1  | 0           | 92.9072114  | 1.01991745  | 0.98914796   | 6.5        | 0          | 0   | 0           | 0          | 0    | 0   | 0 | 0 | 0  | 03962975    |
| 2321_VC_21,0  | 1  | 0           | 27.968809   | 9581.53528  | 0.27869173   | 1.51811    | 0          | 0   | 0           | 0          | 0    | 0   | 0 | 0 | 15 | 1.82971466  |
| 2330_VC_212,0 | 76 | 70837.001   | 15206.22476 | 0.67909361  | 2.106297     | 0          | 0          | 0   | 0.68282253  | 2650       | 3800 | 0   | 0 | 0 | 0  | 1.30067682  |
| 2331_VC_213,0 | 2  | 3.48410928  | 2695716172  | 0.10418332  | 0.136932247  | 6.24497098 | 1          | 1   | 1           | 1          | 1    | 1   | 1 | 1 | 1  | 6.244980    |
| 2332_VC_214,0 | 1  | 0           | 29.2377948  | 0           | 0            | 0          | 0          | 0   | 0           | 0          | 0    | 0   | 0 | 0 | 0  | 0           |
| 2333_VC_215,0 | 1  | 0           | 13.041644   | 473.307948  | 0.23127820   | 0.00045811 | 0          | 0   | 0           | 0          | 0    | 0   | 0 | 0 | 0  | 1.70684537  |
| 2334_VC_216,0 | 4  | 147.245847  | 266.352489  | 0.84723884  | 0.00041426   | 0          | 0          | 0   | 0           | 0          | 0    | 0   | 0 | 0 | 0  | 2.83406068  |
| 2335_VC_217,0 | 2  | 199.432573  | 464.632031  | 0.00043577  | 0.04149477   | 5.74632647 | 0          | 0   | 0           | 0          | 0    | 0   | 0 | 0 | 0  | 5.74632647  |
| 2336_VC_217,1 | 1  | 0           | 261.4681447 | 0.14142050  | 0.0071231977 | 0          | 0          | 0   | 0           | 0          | 0    | 0   | 0 | 0 | 0  | 0           |
| 2337_VC_218,0 | 1  | 0           | 43.65456456 | 385.307915  | 0.00043577   | 0.04149477 | 0          | 0   | 0           | 0          | 0    | 0   | 0 | 0 | 0  | 5.74632647  |
| 2338_VC_218,1 | 1  | 0           | 363.265144  | 0           | 0            | 0          | 0          | 0   | 0           | 0          | 0    | 0   | 0 | 0 | 0  | 0           |
| 2340_VC_219,0 | 1  | 0           | 32.874566   | 0           | 0            | 0          | 0          | 0   | 0           | 0          | 0    | 0   | 0 | 0 | 0  | 0           |
| 2342_VC_219,0 | 39 | 100296.6690 | 10298.62514 | 0.00682601  | 7.916139     | 0          | 0          | 0   | 0.35962365  | 341        | 741  | 0   | 0 | 0 | 0  | 6.30544419  |
| 2343_VC_21,0  | 22 | 49300       | 6103.14238  | 0.53171456  | 3.976111     | 0          | 0          | 0   | 0.426169773 | 231        | 231  | 0   | 0 | 0 | 0  | 0           |
| 2344_VC_21,1  | 1  | 0           | 725.329762  | 0           | 0            | 0          | 0          | 0   | 0           | 0          | 0    | 0   | 0 | 0 | 0  | 0           |
| 2345_VC_210,0 | 2  | 300         | 1495.265777 | 0.61710000  | 0.000443706  | 3          | 3          | 3   | 1           | 1          | 1    | 1   | 1 | 1 | 1  | 0           |
| 2346_VC_212,0 | 2  | 204.035968  | 11.982232   | 0.04978390  | 0.27014687   | 0          | 0          | 0   | 0           | 0          | 0    | 0   | 0 | 0 | 0  | 0           |
| 2347_VC_212,0 | 2  | 36.2264079  | 93.7011714  | 0.42004697  | 0.09213132   | 6.48016069 | 6.48016069 | 1   | 1           | 1          | 1    | 1   | 1 | 1 | 1  | 6.48016067  |
| 2348_VC_212,0 | 23 | 73209.9188  | 4217.26985  | 0.04533261  | 1.584292     | 1          | 1          | 1   | 0.40312437  | 253        | 253  | 0   | 0 | 0 | 0  | 1.39971946  |
| 2349_VC_219,0 | 34 | 5396.4037   | 6355.746279 | 0.09413268  | 5.316162     | 0          | 0          | 0   | 0.16315139  | 561        | 546  | 0   | 0 | 0 | 0  | 0.971682704 |
| 2350_VC_219,0 | 1  | 0           | 98.1788037  | 0           | 0            | 0          | 0          | 0   | 0           | 0          | 0    | 0   | 0 | 0 | 0  | 0           |
| 2351_VC_219,0 | 3  | 534.6968328 | 38.0426148  | 0.04448107  | 0.00666919   | 0          | 0          | 0   | 0.538546407 | 3          | 3    | 0   | 0 | 0 | 0  | 1.49916759  |
| 2352_VC_219,0 | 2  | 1.93020133  | 20.0914263  | 0.00710772  | 0.28007194   | 6.03232597 | 6.03232597 | 1   | 1           | 1          | 1    | 1   | 1 | 1 | 1  | 6.03232597  |
| 2353_VC_219,0 | 3  | 700.6199726 | 192.60007   | 0.73460714  | 0.006589199  | 0          | 0          | 0   | 0           | 1          | 3    | 3   | 0 | 0 | 0  | 0.66666667  |
| 2354_VC_219,0 | 4  | 1600        | 327.51019   | 0.86661975  | 0.00777992   | 0          | 0          | 0   | 0.16227766  | 6          | 6    | 0   | 0 | 0 | 0  | 0           |
| 2355_VC_219,0 | 22 | 49300       | 555.35282   | 0.55019975  | 7.061119     | 2.64573131 | 8.71777887 | 231 | 231         | 0          | 0    | 0   | 0 | 0 | 0  | 1.58113803  |
| 2356_VC_219,0 | 7  | 578.55805   | 550.167628  | 0.51061439  | 6.33015      | 0          | 0          | 0   | 0.62514234  | 21         | 21   | 0   | 0 | 0 | 0  | 1.34677061  |
| 2357_VC_217,0 | 2  | 17.5734414  | 23.2507123  | 0.44580012  | 0.15660774   | 7.93723903 | 7.93723903 | 1   | 1           | 1          | 1    | 1   | 1 | 1 | 1  | 1.93723903  |
| 2358_VC_213,0 | 8  | 258.194403  | 416.131556  | 0.26718337  | 5.835138     | 0          | 0          | 0   | 0           | 7          | 28   | 28  | 0 | 0 | 0  | 0           |
| 2359_VC_219,0 | 2  | 228.231669  | 41.726448   | 0.08112285  | 0.07500781   | 0          | 0          | 0   | 0           | 1          | 1    | 1   | 1 | 1 | 1  | 1.574315716 |
| 2360_VC_219,0 | 2  | 16.7625920  | 6.8810964   | 0.7078455   | 0.2714567    | 6.70823921 | 6.70823921 | 1   | 1           | 1          | 1    | 1   | 1 | 1 | 1  | 6.70823921  |
| 2361_VC_219,0 | 4  | 0           | 0           | 0           | 0            | 0          | 0          | 0   | 0           | 0          | 0    | 0   | 0 | 0 | 0  | 1.73205806  |
| 2362_VC_217,0 | 40 | 6802.0038   | 6.6571043   | 0.6899365   | 0            | 0          | 0          | 0   | 0           | 10.1980380 | 780  | 730 | 0 | 0 | 0  | 0.058987636 |
| 2363_VC_219,0 | 99 | 75370.7346  | 7287.05473  | 0.01128126  | 0            | 0          | 0          | 0   | 0.346791435 | 4051       | 4036 | 0   | 0 | 0 | 0  | 0.992783995 |
| 2364_VC_219,0 | 15 | 31300       | 0           | 0           | 0            | 0          | 0          | 0   | 0           | 4          | 105  | 105 | 0 | 0 | 0  | 1.82037923  |
| 2365_VC_219,0 | 2  | 300         | 252.512173  | 0.1002805   | 0.04334364   | 4.69041576 | 4.69041576 | 1   | 1           | 1          | 1    | 1   | 1 | 1 | 1  | 4.69041576  |
| 2366_VC_219,0 | 34 | 13614.6469  | 3191.46734  | 0.3596469   | 1.381174     | 0          | 0          | 0   | 0.740823012 | 561        | 561  | 0   | 0 | 0 | 0  | 1.48817861  |
| 2367_VC_214,0 | 40 | 13767.1373  | 6085.3076   | 0.68215994  | 0            | 0          | 0          | 0   | 0.34666025  | 780        | 780  | 0   | 0 | 0 | 0  | 1.62499193  |
| 2368_VC_214,0 | 36 | 199531.4258 | 11419.3396  | 0.78483558  | 0            | 0          | 0          | 0   | 0.740109676 | 630        | 630  | 0   | 0 | 0 | 0  | 1.47751031  |
| 2369_VC_214,0 | 2  | 17.7149815  | 0           | 0           | 0            | 0          | 0          | 0   | 0           | 0          | 0    | 0   | 0 | 0 | 0  | 0           |
| 2370_VC_214,0 | 6  | 2047.87568  | 48.0533534  | 0.81939019  | 3.24810      | 0          | 0          | 0   | 0.84025748  | 15         | 15   | 0   | 0 | 0 | 0  | 1.63591013  |
| 2371_VC_214,0 | 11 | 1460.05162  | 5.7375354   | 0.87189512  | 0            | 0          | 0          | 0   | 0.57138023  | 55         | 55   | 0   | 0 | 0 | 0  | 2.2345524   |
| 2372_VC_217,0 | 3  | 18.4969779  | 472.548263  | 0.03771243  | 0.14083248   | 0.02527748 | 0.0424791  | 3   | 3           | 3          | 3    | 3   | 0 | 0 | 0  | 0           |
| 2373_VC_217,0 | 1  | 0           | 4902.209468 | 365.151071  | 0.00043577   | 0.04149477 | 0          | 0   | 0           | 0          | 0    | 0   | 0 | 0 | 0  | 5.74632647  |
| 2374_VC_219,0 | 10 | 1561.77396  | 1021.26796  | 0.57954385  | 3.678126     | 0          | 0          | 0   | 0.4039476   | 45         | 45   | 0   | 0 | 0 | 0  | 0           |
| 2375_VC_219,0 | 2  | 300         | 200.2231    | 0.1342223   | 0.07476664   | 5          | 5          | 5   | 1           | 1          | 1    | 1   | 1 | 1 | 1  | 5           |
| 2376_VC_219,0 | 38 | 6126.37619  | 3612.34261  | 0.04242826  | 3.485140     | 0          | 0          | 0   | 0.73306974  | 703        | 703  | 0   | 0 | 0 | 0  | 1.73205806  |
| 2377_VC_219,0 | 1  | 0           | 178.36294   | 1457.737717 | 0.01093836   | 0.00767363 | 0          | 0   | 0.24657131  | 3          | 3    | 0   | 0 | 0 | 0  | 1.74081421  |
| 2378_VC_219,0 | 2  | 211.136612  | 10807.7978  | 0.0564067   | 0.1189997    | 3.3162479  | 3.3162479  | 1   | 1           | 1          | 1    | 1   | 1 | 1 | 1  | 3.3162479   |
| 2379_VC_217,0 | 2  | 37.2781764  | 129.24078   | 0.317116    | 0.02791431   | 8.26011251 | 8.26011251 | 1   | 1           | 1          | 1    | 1   | 1 | 1 | 1  | 8.26011251  |
| 2380_VC_219,0 | 13 | 19765.201   | 317.044472  | 0.04302402  | 5.855134     | 0          | 0          | 0   | 0           | 1.0214822  | 78   | 78  | 0 | 0 | 0  | 0           |
| 2381_VC_219,0 | 15 | 400         | 202.65966   | 0.17441709  | 0.00657181   | 3.3162479  | 3.3162479  | 1   | 1           | 1          | 1    | 1   | 1 | 1 | 1  | 3.3162479   |
| 2382_VC_219,0 | 39 | 16105.8903  | 0           | 0           | 0            | 0          | 0          | 0   | 0.488979468 | 741        | 741  | 0   | 0 | 0 | 0  | 2.34867107  |
| 2383_VC_217,0 | 1  | 0           | 48.783181   | 0           | 0            | 0          | 0          | 0   | 0           | 0          | 0    | 0   | 0 | 0 | 0  | 0           |
| 2384_VC_217,0 | 1  | 0           | 229.36387   | 0           | 0            | 0          | 0          | 0   | 0           | 0          | 0    | 0   | 0 | 0 | 0  | 0           |
| 2385_VC_219,0 | 3  | 472.97772   | 2813.34230  | 0.1482460   | 0.001519856  | 4.8257505  | 5.47722575 | 3   | 3           | 3          | 3    | 3   | 0 | 0 | 0  | 0           |
| 2386_VC_219,0 | 5  | 3000        | 5719.4832   | 0.04804431  | 7.698166     | 0          | 0          | 0   | 0           | 10         | 10   | 10  | 0 | 0 | 0  | 1.42712041  |
| 2387_VC_219,0 | 4  | 8400        | 4754.2211   | 0.0879125   | 0.02566905   | 0          | 0          | 0   | 0           | 28         | 28   | 28  | 0 | 0 | 0  | 1.86027916  |
| 2388_VC_219,0 | 5  | 3000        | 5899.07861  | 0.04818794  | 0.02561154   | 1.41412562 | 1.41412562 | 10  | 10          | 10         | 10   | 10  | 0 | 0 | 0  | 1.73087058  |
| 2389_VC_219,0 | 3  | 300         | 371.021228  | 0.02566905  | 0.46868122   | 3.3162479  | 3.3162479  | 3   | 3           | 3          | 3    | 3   | 0 | 0 | 0  | 0           |
| 2390_VC_219,0 | 3  | 300         | 371.021228  | 0.02566905  | 0.46868122   | 3.3162479  | 3.3162479  | 3   | 3           | 3          | 3    | 3   | 0 | 0 | 0  | 0           |
| 2391_VC_219,0 | 19 | 51200       | 144671.6025 | 0.02566905  | 9.731212     | 0          | 0          | 0   | 0           | 171        | 171  | 171 | 0 | 0 | 0  | 4.245676    |
| 2392_VC_219,0 | 1  | 0           | 1251.73976  | 0           | 0            | 0          | 0          | 0   | 0           | 0          | 0    | 0   | 0 | 0 | 0  | 0           |
| 2393_VC_219,0 | 1  | 0           | 3402.10784  | 0.20914607  | 0.06147433   | 0          | 0          | 0   | 0           | 1          | 1    | 1   | 1 | 1 | 1  | 6.8083414   |
| 2394_VC_219,0 | 1  | 0           | 10.055834   | 0           | 0            | 0          | 0          | 0   | 0           | 0          | 0    | 0   | 0 | 0 | 0  | 0           |
| 2395_VC_219,0 | 1  | 0           | 10.055834   | 0           | 0            | 0          | 0          | 0   | 0           | 0          | 0    | 0   | 0 | 0 | 0  | 0           |
| 2396_VC_219,0 | 3  | 0           | 0           | 0           | 0            | 0          | 0          | 0   | 0           | 0          | 0    | 0   | 0 | 0 | 0  | 0           |
| 2397_VC_219,0 | 3  | 0           | 0           | 0           | 0            | 0          | 0          | 0   | 0           | 0          | 0    | 0   | 0 | 0 | 0  | 0           |
| 2398_VC_219,0 | 3  | 0           | 0           | 0           | 0            | 0          | 0          | 0   | 0           | 0          | 0    | 0   | 0 | 0 | 0  | 0           |
| 2399_VC_219,0 | 3  | 0           | 0           | 0           | 0            | 0          | 0          | 0   | 0           | 0          | 0    | 0   | 0 | 0 | 0  | 0           |
| 2400_VC_219,0 | 3  | 0           | 0           | 0           | 0            | 0          | 0          | 0   | 0           | 0          | 0    | 0   | 0 | 0 | 0  | 0           |
| 2401_VC_219,0 | 3  | 0           | 0           | 0           | 0            | 0          | 0          | 0   | 0           | 0          | 0    | 0   | 0 | 0 | 0  | 0           |
| 2402_VC_219,0 | 3  | 0           | 0           | 0           | 0            | 0          | 0          | 0   | 0           | 0          | 0    | 0   | 0 | 0 | 0  | 0           |
| 2403_VC_219,0 | 3  | 0           | 0           | 0           | 0            | 0          | 0          | 0   | 0           | 0          | 0    | 0   | 0 | 0 | 0  | 0           |
| 2404_VC_219,0 | 3  | 0           | 0           | 0           | 0            | 0          | 0          | 0   | 0           | 0          | 0    | 0   | 0 | 0 | 0  | 0           |
| 2405_VC_219,0 | 3  | 0           | 0           | 0           | 0            | 0          | 0          | 0   | 0           | 0          | 0    | 0   | 0 | 0 | 0  | 0           |
| 2406_VC_219,0 | 3  | 0           | 0           | 0           | 0            | 0          | 0          | 0   | 0           | 0          | 0    | 0   | 0 | 0 | 0  | 0           |
| 2407_VC_219,0 | 3  | 0           | 0           | 0           | 0            | 0          | 0          | 0   | 0           | 0          | 0    | 0   | 0 | 0 | 0  | 0           |
| 2408_VC_219,0 | 3  | 0           | 0           | 0           | 0            | 0          |            |     |             |            |      |     |   |   |    |             |



Table S8-2. WMS\_genome\_by\_genome\_overview

| Genome   | Order      | Family     | Genus      | VC     | VC Status           | Size | VC Subcluster | VC Subcluster Size | Quality | Adj P-value | Topology | Confidence Score | Genera in VC | Families in VC | Orders in VC | Genus Confidence Score | Reference  |
|----------|------------|------------|------------|--------|---------------------|------|---------------|--------------------|---------|-------------|----------|------------------|--------------|----------------|--------------|------------------------|------------|
| AB002632 | Unassigned | Unassigned | Unassigned | 0_0    | Clustered           | 3    | VC_0_0        | 3                  | 1       | 1           | 1        | 1                | 0            | 0              | 0            | 0                      | 1 Ref      |
| AB008550 | Unassigned | Unassigned | Unassigned | 2_0    | Clustered           | 4    | VC_2_0        | 4                  | 0.1311  | 0.99998692  | 1        | 0.1311           | 0            | 0              | 0            | 0                      | 1 Ref      |
| AB009866 | Unassigned | Unassigned | Unassigned | 7_0    | Clustered           | 28   | VC_7_0        | 28                 | 0.3916  | 1           | 1        | 0.3916           | 0            | 0              | 0            | 0                      | 0.9947 Ref |
| AB012573 | Unassigned | Unassigned | Unassigned | 16_0   | Clustered           | 12   | VC_16_0       | 12                 | 0.6615  | 1           | 1        | 0.6615           | 0            | 0              | 0            | 0                      | 1 Ref      |
| AB012574 | Unassigned | Unassigned | Unassigned | 16_0   | Clustered           | 12   | VC_16_0       | 12                 | 0.6615  | 1           | 1        | 0.6615           | 0            | 0              | 0            | 0                      | 1 Ref      |
| AB016282 | Unassigned | Unassigned | Unassigned | 18_0   | Clustered           | 4    | VC_18_0       | 4                  | 0.9098  | 0.99982347  | 1        | 0.9098           | 0            | 0              | 0            | 0                      | 1 Ref      |
| AB036666 | Unassigned | Unassigned | Unassigned | 22_0   | Clustered           | 11   | VC_22_0       | 11                 | 0.5163  | 1           | 1        | 0.5163           | 0            | 0              | 0            | 0                      | 1 Ref      |
| AB043678 | Unassigned | Unassigned | Unassigned | 17_0   | Clustered           | 9    | VC_17_0       | 9                  | 0.6969  | 1           | 1        | 0.6969           | 0            | 0              | 0            | 0                      | 1 Ref      |
| AB043679 | Unassigned | Unassigned | Unassigned | 17_0   | Clustered           | 9    | VC_17_0       | 9                  | 0.6969  | 1           | 1        | 0.6969           | 0            | 0              | 0            | 0                      | 1 Ref      |
| AB044554 | Unassigned | Unassigned | Unassigned | 7_0    | Clustered           | 28   | VC_7_0        | 28                 | 0.3916  | 1           | 1        | 0.3916           | 0            | 0              | 0            | 0                      | 0.9947 Ref |
| AB045978 | Unassigned | Unassigned | Unassigned | 8_0    | Clustered           | 58   | VC_8_0        | 58                 | 0.8306  | 1           | 1        | 0.8306           | 0            | 0              | 0            | 0                      | 0.9946 Ref |
| AB063393 | Unassigned | Unassigned | Unassigned | 27_0   | Clustered           | 2    | VC_27_0       | 2                  | 1       | 1           | 1        | 1                | 0            | 0              | 0            | 0                      | 1 Ref      |
| AB102868 | Unassigned | Unassigned | Unassigned | 28_1   | Clustered           | 53   | VC_28_1       | 53                 | 0.7164  | 1           | 1        | 0.7164           | 0            | 0              | 0            | 0                      | 0.9325 Ref |
| AB231700 | Unassigned | Unassigned | Unassigned | 38_0   | Clustered           | 3    | VC_38_0       | 3                  | 1       | 0           | 0        | 0                | 0            | 0              | 0            | 0                      | 1 Ref      |
| AB243556 | Unassigned | Unassigned | Unassigned | 7_0    | Clustered           | 28   | VC_7_0        | 28                 | 0.3916  | 1           | 1        | 0.3916           | 0            | 0              | 0            | 0                      | 0.9947 Ref |
| AB259123 | Unassigned | Unassigned | Unassigned | 52_0   | Clustered           | 87   | VC_52_0       | 87                 | 0.9858  | 1           | 1        | 0.9858           | 0            | 0              | 0            | 0                      | 1 Ref      |
| AB259124 | Unassigned | Unassigned | Unassigned | 54_0   | Clustered           | 6    | VC_54_0       | 6                  | 0.6725  | 0.9999999   | 1        | 0.6725           | 0            | 0              | 0            | 0                      | 1 Ref      |
| AB276040 | Unassigned | Unassigned | Unassigned | 1_0    | Clustered           | 54   | VC_1_0        | 54                 | 0.8527  | 1           | 1        | 0.8527           | 0            | 0              | 0            | 0                      | 1 Ref      |
| AB285204 | Unassigned | Unassigned | Unassigned | 51_0   | Clustered           | 10   | VC_51_0       | 10                 | 0.1741  | 1           | 1        | 0.1741           | 0            | 0              | 0            | 0                      | 1 Ref      |
| AB334720 | Unassigned | Unassigned | Unassigned | 61_0   | Clustered           | 12   | VC_61_0       | 12                 | 0.7633  | 1           | 1        | 0.7633           | 0            | 0              | 0            | 0                      | 1 Ref      |
| AB334721 | Unassigned | Unassigned | Unassigned | 61_0   | Clustered           | 12   | VC_61_0       | 12                 | 0.7633  | 1           | 1        | 0.7633           | 0            | 0              | 0            | 0                      | 1 Ref      |
| AB362338 | Unassigned | Unassigned | Unassigned | 28_1   | Clustered           | 53   | VC_28_1       | 53                 | 0.7164  | 1           | 1        | 0.7164           | 0            | 0              | 0            | 0                      | 0.9325 Ref |
| AB366653 | Unassigned | Unassigned | Unassigned | 66_3   | Clustered/Singleton | 1    | VC_66_3       | 1                  | 0       | 1           | 1        | 0                | 0            | 0              | 0            | 0                      | 1 Ref      |
| AB370205 | Unassigned | Unassigned | Unassigned | 9_0    | Clustered           | 38   | VC_9_0        | 38                 | 0.4895  | 1           | 1        | 0.4895           | 0            | 0              | 0            | 0                      | 1 Ref      |
| AB370268 | Unassigned | Unassigned | Unassigned | 12_2   | Clustered           | 19   | VC_12_2       | 19                 | 0.2018  | 1           | 1        | 0.2018           | 0            | 0              | 0            | 0                      | 1 Ref      |
| AB374228 | Unassigned | Unassigned | Unassigned | 5_0    | Clustered           | 30   | VC_5_0        | 30                 | 0.9647  | 1           | 1        | 0.9647           | 0            | 0              | 0            | 0                      | 1 Ref      |
| AB426868 | Unassigned | Unassigned | Unassigned | 28_1   | Clustered           | 53   | VC_28_1       | 53                 | 0.7164  | 1           | 1        | 0.7164           | 0            | 0              | 0            | 0                      | 0.9325 Ref |
| AB434711 | Unassigned | Unassigned | Unassigned | 52_0   | Clustered           | 87   | VC_52_0       | 87                 | 0.9858  | 1           | 1        | 0.9858           | 0            | 0              | 0            | 0                      | 1 Ref      |
| AB472900 | Unassigned | Unassigned | Unassigned | 77_0   | Clustered           | 20   | VC_77_0       | 20                 | 0.9657  | 1           | 1        | 0.9657           | 0            | 0              | 0            | 0                      | 1 Ref      |
| AB560486 | Unassigned | Unassigned | Unassigned | 79_0   | Clustered           | 64   | VC_79_0       | 64                 | 0.4185  | 1           | 1        | 0.4185           | 0            | 0              | 0            | 0                      | 0.7649 Ref |
| AB572858 | Unassigned | Unassigned | Unassigned | 16_0   | Clustered           | 12   | VC_16_0       | 12                 | 0.6615  | 1           | 1        | 0.6615           | 0            | 0              | 0            | 0                      | 1 Ref      |
| AB597179 | Unassigned | Unassigned | Unassigned | 83_0   | Clustered           | 6    | VC_83_0       | 6                  | 0.6436  | 1           | 1        | 0.6436           | 0            | 0              | 0            | 0                      | 1 Ref      |
| AB609718 | Unassigned | Unassigned | Unassigned | 91_0   | Clustered           | 22   | VC_91_0       | 22                 | 0.5318  | 1           | 1        | 0.5318           | 0            | 0              | 0            | 0                      | 1 Ref      |
| AB626962 | Unassigned | Unassigned | Unassigned | 96_0   | Clustered           | 30   | VC_96_0       | 30                 | 0.718   | 1           | 1        | 0.718            | 0            | 0              | 0            | 0                      | 1 Ref      |
| AB626963 | Unassigned | Unassigned | Unassigned | 96_0   | Clustered           | 30   | VC_96_0       | 30                 | 0.718   | 1           | 1        | 0.718            | 0            | 0              | 0            | 0                      | 1 Ref      |
| AB647160 | Unassigned | Unassigned | Unassigned | 99_0   | Clustered           | 32   | VC_99_0       | 32                 | 0.8828  | 1           | 1        | 0.8828           | 0            | 0              | 0            | 0                      | 1 Ref      |
| AB712291 | Unassigned | Unassigned | Unassigned | 108_0  | Clustered           | 33   | VC_108_0      | 33                 | 0.949   | 1           | 1        | 0.949            | 0            | 0              | 0            | 0                      | 1 Ref      |
| AB716666 | Unassigned | Unassigned | Unassigned | 111_0  | Clustered           | 91   | VC_111_0      | 91                 | 0.9587  | 1           | 1        | 0.9587           | 0            | 0              | 0            | 0                      | 1 Ref      |
| AB720063 | Unassigned | Unassigned | Unassigned | 113_0  | Clustered           | 9    | VC_113_0      | 9                  | 0.519   | 1           | 1        | 0.519            | 0            | 0              | 0            | 0                      | 1 Ref      |
| AB720064 | Unassigned | Unassigned | Unassigned | 116_0  | Clustered           | 13   | VC_116_0      | 13                 | 1       | 1           | 1        | 1                | 0            | 0              | 0            | 0                      | 1 Ref      |
| AB731695 | Unassigned | Unassigned | Unassigned | 99_0   | Clustered           | 32   | VC_99_0       | 32                 | 0.8828  | 1           | 1        | 0.8828           | 0            | 0              | 0            | 0                      | 1 Ref      |
| AB746912 | Unassigned | Unassigned | Unassigned | 118_0  | Clustered           | 3    | VC_118_0      | 3                  | 0.7119  | 0.99211494  | 1        | 0.7063           | 0            | 0              | 0            | 0                      | 1 Ref      |
| AB757800 | Unassigned | Unassigned | Unassigned | 117_0  | Clustered           | 9    | VC_117_0      | 9                  | 0.9977  | 0.98988637  | 1        | 0.9876           | 0            | 0              | 0            | 0                      | 1 Ref      |
| AB757801 | Unassigned | Unassigned | Unassigned | 117_0  | Clustered           | 9    | VC_117_0      | 9                  | 0.9977  | 0.98988637  | 1        | 0.9876           | 0            | 0              | 0            | 0                      | 1 Ref      |
| AB775548 | Unassigned | Unassigned | Unassigned | 125_0  | Clustered           | 17   | VC_125_0      | 17                 | 0.9244  | 1           | 1        | 0.9244           | 0            | 0              | 0            | 0                      | 1 Ref      |
| AB775549 | Unassigned | Unassigned | Unassigned | 130_0  | Clustered           | 19   | VC_130_0      | 19                 | 0.6068  | 1           | 1        | 0.6068           | 0            | 0              | 0            | 0                      | 1 Ref      |
| AB797215 | Unassigned | Unassigned | Unassigned | 132_1  | Clustered           | 17   | VC_132_1      | 17                 | 0.1738  | 1           | 1        | 0.1738           | 0            | 0              | 0            | 0                      | 0.9853 Ref |
| AB828698 | Unassigned | Unassigned | Unassigned | 54_0   | Clustered           | 6    | VC_54_0       | 6                  | 0.6725  | 0.9999999   | 1        | 0.6725           | 0            | 0              | 0            | 0                      | 1 Ref      |
| AB853330 | Unassigned | Unassigned | Unassigned | 149_13 | Clustered           | 3    | VC_149_13     | 3                  | 0.0087  | 0.95178903  | 1        | 0.0083           | 0            | 0              | 0            | 0                      | 1 Ref      |
| AB853331 | Unassigned | Unassigned | Unassigned | 149_23 | Clustered/Singleton | 1    | VC_149_23     | 1                  | 0       | 1           | 1        | 0                | 0            | 0              | 0            | 0                      | 1 Ref      |
| AB854109 | Unassigned | Unassigned | Unassigned | 154_0  | Clustered           | 4    | VC_154_0      | 4                  | 0.1766  | 0.99995106  | 1        | 0.1766           | 0            | 0              | 0            | 0                      | 1 Ref      |
| AB863625 | Unassigned | Unassigned | Unassigned | 161_0  | Clustered           | 3    | VC_161_0      | 3                  | 0.5777  | 0.99804396  | 1        | 0.5765           | 0            | 0              | 0            | 0                      | 1 Ref      |
| AB897757 | Unassigned | Unassigned | Unassigned | 164_10 | Clustered           | 5    | VC_164_10     | 5                  | 0.0615  | 0.96483582  | 1        | 0.0593           | 0            | 0              | 0            | 0                      | 1 Ref      |
| AB903967 | Unassigned | Unassigned | Unassigned | 149_14 | Clustered/Singleton | 1    | VC_149_14     | 1                  | 0       | 1           | 1        | 0                | 0            | 0              | 0            | 0                      | 1 Ref      |
| AB910392 | Unassigned | Unassigned | Unassigned | 167_0  | Clustered           | 3    | VC_167_0      | 3                  | 0.6952  | 0.99826575  | 1        | 0.694            | 0            | 0              | 0            | 0                      | 1 Ref      |
| AB910393 | Unassigned | Unassigned | Unassigned | 174_0  | Clustered           | 3    | VC_174_0      | 3                  | 0.9624  | 0.99333557  | 1        | 0.9559           | 0            | 0              | 0            | 0                      | 1 Ref      |
| AB910602 | Unassigned | Unassigned | Unassigned | 177_0  | Clustered           | 5    | VC_177_0      | 5                  | 0.7468  | 0.99885646  | 1        | 0.746            | 0            | 0              | 0            | 0                      | 1 Ref      |
| AB916497 | Unassigned | Unassigned | Unassigned | 180_0  | Clustered           | 4    | VC_180_0      | 4                  | 0.2056  | 0.9999862   | 1        | 0.2056           | 0            | 0              | 0            | 0                      | 1 Ref      |
| AB920995 | Unassigned | Unassigned | Unassigned | 70_0   | Clustered           | 27   | VC_70_0       | 27                 | 0.5981  | 1           | 1        | 0.5981           | 0            | 0              | 0            | 0                      | 0.9886 Ref |
| AB930182 | Unassigned | Unassigned | Unassigned | 85_3   | Clustered           | 19   | VC_85_3       | 19                 | 0.3671  | 1           | 1        | 0.3671           | 0            | 0              | 0            | 0                      | 0.807 Ref  |
| AB931172 | Unassigned | Unassigned | Unassigned | 54_0   | Clustered           | 6    | VC_54_0       | 6                  | 0.6725  | 0.9999999   | 1        | 0.6725           | 0            | 0              | 0            | 0                      | 1 Ref      |
| AB937974 | Unassigned | Unassigned | Unassigned | 52_0   | Clustered           | 87   | VC_52_0       | 87                 | 0.9858  | 1           | 1        | 0.9858           | 0            | 0              | 0            | 0                      | 1 Ref      |
| AB971354 | Unassigned | Unassigned | Unassigned | 188_0  | Clustered           | 13   | VC_188_0      | 13                 | 0.9973  | 0.99823802  | 1        | 0.9956           | 0            | 0              | 0            | 0                      | 1 Ref      |
| AB981169 | Unassigned | Unassigned | Unassigned | 1_0    | Clustered           | 54   | VC_1_0        | 54                 | 0.8527  | 1           | 1        | 0.8527           | 0            | 0              | 0            | 0                      | 1 Ref      |
| AB981170 | Unassigned | Unassigned | Unassigned | 52_0   | Clustered           | 87   | VC_52_0       | 87                 | 0.9858  | 1           | 1        | 0.9858           | 0            | 0              | 0            | 0                      | 1 Ref      |
| AB983711 | Unassigned | Unassigned | Unassigned | 70_0   | Clustered           | 27   | VC_70_0       | 27                 | 0.5981  | 1           | 1        | 0.5981           | 0            | 0              | 0            | 0                      | 0.9886 Ref |
| AC171169 | Unassigned | Unassigned | Unassigned | 190_11 | Clustered/Singleton | 1    | VC_190_11     | 1                  | 0       | 1           | 1        | 0                | 0            | 0              | 0            | 0                      | 1 Ref      |
| AE002163 | Unassigned | Unassigned | Unassigned | 197_0  | Clustered           | 5    | VC_197_0      | 5                  | 0.1324  | 0.84698401  | 1        | 0.1122           | 0            | 0              | 0            | 0                      | 1 Ref      |
| AF009630 | Unassigned | Unassigned | Unassigned | 202_0  | Clustered           | 102  | VC_202_0      | 102                | 0.4049  | 1           | 1        | 0.4049           | 0            | 0              | 0            | 0                      | 0.7876 Ref |
| AF011378 | Unassigned | Unassigned | Unassigned | 202_0  | Clustered           | 102  | VC_202_0      | 102                | 0.4049  | 1           | 1        | 0.4049           | 0            | 0              | 0            | 0                      | 0.7876 Ref |
| AF020713 | Unassigned | Unassigned | Unassigned | 89_3   | Clustered/Singleton | 1    | VC_89_3       | 1                  | 0       | 1           | 1        | 0                | 0            | 0              | 0            | 0                      | 1 Ref      |
| AF022214 | Unassigned | Unassigned | Unassigned | 215_1  | Clustered           | 19   | VC_215_1      | 19                 | 0.4188  | 1           | 1        | 0.4188           | 0            | 0              | 0            | 0                      | 1 Ref      |
| AF059242 | Unassigned | Unassigned | Unassigned | 188_0  | Clustered           | 13   | VC_188_0      | 13                 | 0.9973  | 0.99823802  | 1        | 0.9956           | 0            | 0              | 0            | 0                      | 1 Ref      |
| AF059243 | Unassigned | Unassigned | Unassigned | 188_0  | Clustered           | 13   | VC_188_0      | 13                 | 0.9973  | 0.99823802  | 1        | 0.9956           | 0            | 0              | 0            | 0                      | 1 Ref      |
| AF063097 | Unassigned | Unassigned | Unassigned | 228_0  | Clustered           | 60   | VC_228_0      | 60                 | 0.942   | 1           | 1        | 0.942            | 0            | 0              | 0            | 0                      | 1 Ref      |
| AF065411 | Unassigned | Unassigned | Unassigned | 232_0  | Clustered           | 2    | VC_232_0      | 2                  | 0.9272  | 0.72985431  | 1        | 0.6768           | 0            | 0              | 0            | 0                      | 1 Ref      |
| AF083977 | Unassigned | Unassigned | Unassigned | 50_0   | Clustered           | 9    | VC_50_0       | 9                  | 0.5531  | 1           | 1        | 0.5531           | 0            | 0              | 0            | 0                      | 1 Ref      |
| AF085222 | Unassigned | Unassigned | Unassigned | 252_0  | Clustered           | 121  | VC_252_0      | 121                | 0.7376  | 1           | 1        | 0.7376           | 0            | 0              | 0            | 0                      | 0.9999 Ref |



|          |            |            |            |        |           |              |     |        |            |        |   |   |   |        |     |
|----------|------------|------------|------------|--------|-----------|--------------|-----|--------|------------|--------|---|---|---|--------|-----|
| AF115102 | Unassigned | Unassigned | Unassigned | 252_0  | Clustered | 121 VC_252_0 | 121 | 0.7376 | 1          | 0.7376 | 0 | 0 | 0 | 0.9999 | Ref |
| AF115103 | Unassigned | Unassigned | Unassigned | 252_0  | Clustered | 121 VC_252_0 | 121 | 0.7376 | 1          | 0.7376 | 0 | 0 | 0 | 0.9999 | Ref |
| AF125163 | Unassigned | Unassigned | Unassigned | 5_0    | Clustered | 30 VC_5_0    | 30  | 0.9647 | 1          | 0.9647 | 0 | 0 | 0 | 1      | Ref |
| AF125520 | Unassigned | Unassigned | Unassigned | 39_0   | Clustered | 35 VC_39_0   | 35  | 0.4337 | 1          | 0.4337 | 0 | 0 | 0 | 1      | Ref |
| AF133242 | Unassigned | Unassigned | Unassigned | 276_0  | Clustered | 2 VC_276_0   | 2   | 1      | 1          | 1      | 0 | 0 | 0 | 1      | Ref |
| AF145054 | Unassigned | Unassigned | Unassigned | 252_0  | Clustered | 121 VC_252_0 | 121 | 0.7376 | 1          | 0.7376 | 0 | 0 | 0 | 0.9999 | Ref |
| AF155037 | Unassigned | Unassigned | Unassigned | 277_0  | Clustered | 3 VC_277_0   | 3   | 1      | 1          | 1      | 0 | 0 | 0 | 1      | Ref |
| AF157835 | Unassigned | Unassigned | Unassigned | 29_0   | Clustered | 10 VC_29_0   | 10  | 0.5208 | 1          | 0.5208 | 0 | 0 | 0 | 1      | Ref |
| AF158101 | Unassigned | Unassigned | Unassigned | 283_91 | Clustered | 11 VC_283_91 | 11  | 0.0285 | 1          | 0.0285 | 0 | 0 | 0 | 1      | Ref |
| AF158600 | Unassigned | Unassigned | Unassigned | 254_0  | Clustered | 46 VC_254_0  | 46  | 0.5159 | 1          | 0.5159 | 0 | 0 | 0 | 1      | Ref |
| AF165214 | Unassigned | Unassigned | Unassigned | 176_0  | Clustered | 2 VC_176_0   | 2   | 0.0498 | 0.95663741 | 0.0476 | 0 | 0 | 0 | 1      | Ref |
| AF176025 | Unassigned | Unassigned | Unassigned | 260_0  | Clustered | 13 VC_260_0  | 13  | 0.3705 | 1          | 0.3705 | 0 | 0 | 0 | 1      | Ref |
| AF176027 | Unassigned | Unassigned | Unassigned | 303_0  | Clustered | 155 VC_303_0 | 155 | 0.9979 | 1          | 0.9979 | 0 | 0 | 0 | 1      | Ref |
| AF176028 | Unassigned | Unassigned | Unassigned | 303_0  | Clustered | 155 VC_303_0 | 155 | 0.9979 | 1          | 0.9979 | 0 | 0 | 0 | 1      | Ref |
| AF176029 | Unassigned | Unassigned | Unassigned | 303_0  | Clustered | 155 VC_303_0 | 155 | 0.9979 | 1          | 0.9979 | 0 | 0 | 0 | 1      | Ref |
| AF176030 | Unassigned | Unassigned | Unassigned | 303_0  | Clustered | 155 VC_303_0 | 155 | 0.9979 | 1          | 0.9979 | 0 | 0 | 0 | 1      | Ref |
| AF176031 | Unassigned | Unassigned | Unassigned | 303_0  | Clustered | 155 VC_303_0 | 155 | 0.9979 | 1          | 0.9979 | 0 | 0 | 0 | 1      | Ref |
| AF176032 | Unassigned | Unassigned | Unassigned | 303_0  | Clustered | 155 VC_303_0 | 155 | 0.9979 | 1          | 0.9979 | 0 | 0 | 0 | 1      | Ref |
| AF176033 | Unassigned | Unassigned | Unassigned | 303_0  | Clustered | 155 VC_303_0 | 155 | 0.9979 | 1          | 0.9979 | 0 | 0 | 0 | 1      | Ref |
| AF176034 | Unassigned | Unassigned | Unassigned | 303_0  | Clustered | 155 VC_303_0 | 155 | 0.9979 | 1          | 0.9979 | 0 | 0 | 0 | 1      | Ref |
| AF189021 | Unassigned | Unassigned | Unassigned | 304_0  | Clustered | 11 VC_304_0  | 11  | 0.7869 | 1          | 0.7869 | 0 | 0 | 0 | 1      | Ref |
| AF191797 | Unassigned | Unassigned | Unassigned | 306_0  | Clustered | 2 VC_306_0   | 2   | 1      | 1          | 1      | 0 | 0 | 0 | 1      | Ref |
| AF195902 | Unassigned | Unassigned | Unassigned | 308_0  | Clustered | 4 VC_308_0   | 4   | 0.5014 | 0.99997418 | 0.5013 | 0 | 0 | 0 | 1      | Ref |
| AF217253 | Unassigned | Unassigned | Unassigned | 28_1   | Clustered | 53 VC_28_1   | 53  | 0.7164 | 1          | 0.7164 | 0 | 0 | 0 | 0.9325 | Ref |
| AF222060 | Unassigned | Unassigned | Unassigned | 310_0  | Clustered | 33 VC_310_0  | 33  | 0.8771 | 1          | 0.8771 | 0 | 0 | 0 | 1      | Ref |
| AF227250 | Unassigned | Unassigned | Unassigned | 315_0  | Clustered | 12 VC_315_0  | 12  | 0.8947 | 1          | 0.8947 | 0 | 0 | 0 | 1      | Ref |
| AF232233 | Unassigned | Unassigned | Unassigned | 251_0  | Clustered | 22 VC_251_0  | 22  | 0.6508 | 1          | 0.6508 | 0 | 0 | 0 | 1      | Ref |
| AF234172 | Unassigned | Unassigned | Unassigned | 247_0  | Clustered | 14 VC_247_0  | 14  | 0.9119 | 1          | 0.9119 | 0 | 0 | 0 | 0.967  | Ref |
| AF234173 | Unassigned | Unassigned | Unassigned | 247_0  | Clustered | 14 VC_247_0  | 14  | 0.9119 | 1          | 0.9119 | 0 | 0 | 0 | 0.967  | Ref |
| AF271693 | Unassigned | Unassigned | Unassigned | 325_39 | Clustered | 2 VC_325_39  | 2   | 0.0045 | 0.95750889 | 0.0043 | 0 | 0 | 0 | 1      | Ref |
| AF274751 | Unassigned | Unassigned | Unassigned | 303_0  | Clustered | 155 VC_303_0 | 155 | 0.9979 | 1          | 0.9979 | 0 | 0 | 0 | 1      | Ref |
| AF299300 | Unassigned | Unassigned | Unassigned | 303_0  | Clustered | 155 VC_303_0 | 155 | 0.9979 | 1          | 0.9979 | 0 | 0 | 0 | 1      | Ref |
| AF299301 | Unassigned | Unassigned | Unassigned | 303_0  | Clustered | 155 VC_303_0 | 155 | 0.9979 | 1          | 0.9979 | 0 | 0 | 0 | 1      | Ref |
| AF299302 | Unassigned | Unassigned | Unassigned | 303_0  | Clustered | 155 VC_303_0 | 155 | 0.9979 | 1          | 0.9979 | 0 | 0 | 0 | 1      | Ref |
| AF299303 | Unassigned | Unassigned | Unassigned | 303_0  | Clustered | 155 VC_303_0 | 155 | 0.9979 | 1          | 0.9979 | 0 | 0 | 0 | 1      | Ref |
| AF299304 | Unassigned | Unassigned | Unassigned | 303_0  | Clustered | 155 VC_303_0 | 155 | 0.9979 | 1          | 0.9979 | 0 | 0 | 0 | 1      | Ref |
| AF299305 | Unassigned | Unassigned | Unassigned | 303_0  | Clustered | 155 VC_303_0 | 155 | 0.9979 | 1          | 0.9979 | 0 | 0 | 0 | 1      | Ref |
| AF299306 | Unassigned | Unassigned | Unassigned | 303_0  | Clustered | 155 VC_303_0 | 155 | 0.9979 | 1          | 0.9979 | 0 | 0 | 0 | 1      | Ref |
| AF299307 | Unassigned | Unassigned | Unassigned | 303_0  | Clustered | 155 VC_303_0 | 155 | 0.9979 | 1          | 0.9979 | 0 | 0 | 0 | 1      | Ref |
| AF299308 | Unassigned | Unassigned | Unassigned | 303_0  | Clustered | 155 VC_303_0 | 155 | 0.9979 | 1          | 0.9979 | 0 | 0 | 0 | 1      | Ref |
| AF299309 | Unassigned | Unassigned | Unassigned | 303_0  | Clustered | 155 VC_303_0 | 155 | 0.9979 | 1          | 0.9979 | 0 | 0 | 0 | 1      | Ref |
| AF299310 | Unassigned | Unassigned | Unassigned | 303_0  | Clustered | 155 VC_303_0 | 155 | 0.9979 | 1          | 0.9979 | 0 | 0 | 0 | 1      | Ref |
| AF299311 | Unassigned | Unassigned | Unassigned | 303_0  | Clustered | 155 VC_303_0 | 155 | 0.9979 | 1          | 0.9979 | 0 | 0 | 0 | 1      | Ref |
| AF299312 | Unassigned | Unassigned | Unassigned | 303_0  | Clustered | 155 VC_303_0 | 155 | 0.9979 | 1          | 0.9979 | 0 | 0 | 0 | 1      | Ref |
| AF299313 | Unassigned | Unassigned | Unassigned | 303_0  | Clustered | 155 VC_303_0 | 155 | 0.9979 | 1          | 0.9979 | 0 | 0 | 0 | 1      | Ref |
| AF299314 | Unassigned | Unassigned | Unassigned | 303_0  | Clustered | 155 VC_303_0 | 155 | 0.9979 | 1          | 0.9979 | 0 | 0 | 0 | 1      | Ref |
| AF301375 | Unassigned | Unassigned | Unassigned | 232_0  | Clustered | 2 VC_232_0   | 2   | 0.9272 | 0.72985431 | 0.6768 | 0 | 0 | 0 | 1      | Ref |
| AF306496 | Unassigned | Unassigned | Unassigned | 327_0  | Clustered | 12 VC_327_0  | 12  | 0.8925 | 1          | 0.8925 | 0 | 0 | 0 | 1      | Ref |
| AF320576 | Unassigned | Unassigned | Unassigned | 329_1  | Clustered | 17 VC_329_1  | 17  | 0.0867 | 1          | 0.0867 | 0 | 0 | 0 | 0.8235 | Ref |
| AF323668 | Unassigned | Unassigned | Unassigned | 263_0  | Clustered | 7 VC_263_0   | 7   | 0.2364 | 1          | 0.2364 | 0 | 0 | 0 | 1      | Ref |
| AF323669 | Unassigned | Unassigned | Unassigned | 260_0  | Clustered | 13 VC_260_0  | 13  | 0.3705 | 1          | 0.3705 | 0 | 0 | 0 | 1      | Ref |
| AF323671 | Unassigned | Unassigned | Unassigned | 339_0  | Clustered | 9 VC_339_0   | 9   | 0.9405 | 0.99999771 | 0.9405 | 0 | 0 | 0 | 1      | Ref |
| AF334111 | Unassigned | Unassigned | Unassigned | 227_0  | Clustered | 2 VC_227_0   | 2   | 0.3333 | 0          | 0      | 0 | 0 | 0 | 1      | Ref |
| AF335538 | Unassigned | Unassigned | Unassigned | 30_1   | Clustered | 16 VC_30_1   | 16  | 0.1973 | 1          | 0.1973 | 0 | 0 | 0 | 0.8333 | Ref |
| AF338467 | Unassigned | Unassigned | Unassigned | 340_0  | Clustered | 31 VC_340_0  | 31  | 0.9549 | 1          | 0.9549 | 0 | 0 | 0 | 1      | Ref |
| AF396866 | Unassigned | Unassigned | Unassigned | 341_0  | Clustered | 3 VC_341_0   | 3   | 0.2522 | 0.9396546  | 0.237  | 0 | 0 | 0 | 1      | Ref |
| AF399011 | Unassigned | Unassigned | Unassigned | 344_0  | Clustered | 21 VC_344_0  | 21  | 0.5436 | 1          | 0.5436 | 0 | 0 | 0 | 1      | Ref |
| AF424781 | Unassigned | Unassigned | Unassigned | 9_0    | Clustered | 38 VC_9_0    | 38  | 0.4895 | 1          | 0.4895 | 0 | 0 | 0 | 1      | Ref |
| AF424782 | Unassigned | Unassigned | Unassigned | 8_0    | Clustered | 58 VC_8_0    | 58  | 0.8306 | 1          | 0.8306 | 0 | 0 | 0 | 0.9946 | Ref |
| AF424783 | Unassigned | Unassigned | Unassigned | 7_0    | Clustered | 28 VC_7_0    | 28  | 0.3916 | 1          | 0.3916 | 0 | 0 | 0 | 0.9947 | Ref |
| AF440571 | Unassigned | Unassigned | Unassigned | 349_0  | Clustered | 7 VC_349_0   | 7   | 0.9363 | 0.99999996 | 0.9363 | 0 | 0 | 0 | 1      | Ref |
| AF440695 | Unassigned | Unassigned | Unassigned | 352_0  | Clustered | 3 VC_352_0   | 3   | 0.7306 | 0.98867275 | 0.7223 | 0 | 0 | 0 | 1      | Ref |
| AF447491 | Unassigned | Unassigned | Unassigned | 353_0  | Clustered | 6 VC_353_0   | 6   | 0.545  | 1          | 0.545  | 0 | 0 | 0 | 1      | Ref |
| AF452449 | Unassigned | Unassigned | Unassigned | 16_0   | Clustered | 12 VC_16_0   | 12  | 0.6615 | 1          | 0.6615 | 0 | 0 | 0 | 1      | Ref |
| AF453500 | Unassigned | Unassigned | Unassigned | 16_0   | Clustered | 12 VC_16_0   | 12  | 0.6615 | 1          | 0.6615 | 0 | 0 | 0 | 1      | Ref |
| AF454431 | Unassigned | Unassigned | Unassigned | 360_0  | Clustered | 358 VC_360_0 | 358 | 0.9615 | 1          | 0.9615 | 0 | 0 | 0 | 1      | Ref |
| AF489521 | Unassigned | Unassigned | Unassigned | 260_0  | Clustered | 13 VC_260_0  | 13  | 0.3705 | 1          | 0.3705 | 0 | 0 | 0 | 1      | Ref |
| AF493143 | Unassigned | Unassigned | Unassigned | 129_0  | Clustered | 43 VC_129_0  | 43  | 0.886  | 1          | 0.886  | 0 | 0 | 0 | 1      | Ref |
| AF503408 | Unassigned | Unassigned | Unassigned | 247_0  | Clustered | 14 VC_247_0  | 14  | 0.9119 | 1          | 0.9119 | 0 | 0 | 0 | 0.967  | Ref |
| AF513032 | Unassigned | Unassigned | Unassigned | 96_0   | Clustered | 30 VC_96_0   | 30  | 0.718  | 1          | 0.718  | 0 | 0 | 0 | 1      | Ref |
| AF513033 | Unassigned | Unassigned | Unassigned | 96_0   | Clustered | 30 VC_96_0   | 30  | 0.718  | 1          | 0.718  | 0 | 0 | 0 | 1      | Ref |
| AF527608 | Unassigned | Unassigned | Unassigned | 28_1   | Clustered | 53 VC_28_1   | 53  | 0.7164 | 1          | 0.7164 | 0 | 0 | 0 | 0.9325 | Ref |
| AF547430 | Unassigned | Unassigned | Unassigned | 371_16 | Clustered | 42 VC_371_16 | 42  | 0.1341 | 1          | 0.1341 | 0 | 0 | 0 | 0.7282 | Ref |
| AF547987 | Unassigned | Unassigned | Unassigned | 30_1   | Clustered | 16 VC_30_1   | 16  | 0.1973 | 1          | 0.1973 | 0 | 0 | 0 | 0.8333 | Ref |
| AJ006589 | Unassigned | Unassigned | Unassigned | 373_0  | Clustered | 10 VC_373_0  | 10  | 0.7471 | 1          | 0.7471 | 0 | 0 | 0 | 1      | Ref |
| AJ131519 | Unassigned | Unassigned | Unassigned | 307_0  | Clustered | 2 VC_307_0   | 2   | 0.3835 | 0.95251406 | 0.3653 | 0 | 0 | 0 | 1      | Ref |
| AJ242593 | Unassigned | Unassigned | Unassigned | 378_0  | Clustered | 9 VC_378_0   | 9   | 0.7603 | 1          | 0.7603 | 0 | 0 | 0 | 1      | Ref |
| AJ245616 | Unassigned | Unassigned | Unassigned | 260_0  | Clustered | 13 VC_260_0  | 13  | 0.3705 | 1          | 0.3705 | 0 | 0 | 0 | 1      | Ref |
| AJ251789 | Unassigned | Unassigned | Unassigned | 272_0  | Clustered | 11 VC_272_0  | 11  | 0.4915 | 1          | 0.4915 | 0 | 0 | 0 | 0.8727 | Ref |
| AJ251805 | Unassigned | Unassigned | Unassigned | 385_0  | Clustered | 51 VC_385_0  | 51  | 0.8754 | 1          | 0.8754 | 0 | 0 | 0 | 1      | Ref |
| AJ270057 | Unassigned | Unassigned | Unassigned | 198_0  | Clustered | 28 VC_198_0  | 28  | 0.2429 | 0.99971175 | 0.2429 | 0 | 0 | 0 | 1      | Ref |



|          |            |            |            |        |                     |             |    |        |            |        |   |   |   |            |
|----------|------------|------------|------------|--------|---------------------|-------------|----|--------|------------|--------|---|---|---|------------|
| AJ278322 | Unassigned | Unassigned | Unassigned | 407_0  | Clustered           | 3 VC_407_0  | 3  | 0.3352 | 0.99824791 | 0.3346 | 0 | 0 | 0 | 1 Ref      |
| AJ298298 | Unassigned | Unassigned | Unassigned | 45_0   | Clustered           | 12 VC_45_0  | 12 | 0.35   | 1          | 0.35   | 0 | 0 | 0 | 1 Ref      |
| AJ302074 | Unassigned | Unassigned | Unassigned | 412_0  | Clustered           | 39 VC_412_0 | 39 | 0.845  | 1          | 0.845  | 0 | 0 | 0 | 1 Ref      |
| AJ312240 | Unassigned | Unassigned | Unassigned | 379_0  | Clustered           | 5 VC_379_0  | 5  | 0.4779 | 0.99999992 | 0.4779 | 0 | 0 | 0 | 0.9 Ref    |
| AJ318471 | Unassigned | Unassigned | Unassigned | 385_0  | Clustered           | 51 VC_385_0 | 51 | 0.8754 | 1          | 0.8754 | 0 | 0 | 0 | 1 Ref      |
| AJ344259 | Unassigned | Unassigned | Unassigned | 348_0  | Clustered           | 22 VC_348_0 | 22 | 0.9602 | 1          | 0.9602 | 0 | 0 | 0 | 1 Ref      |
| AJ414696 | Unassigned | Unassigned | Unassigned | 348_0  | Clustered           | 22 VC_348_0 | 22 | 0.9602 | 1          | 0.9602 | 0 | 0 | 0 | 1 Ref      |
| AJ421943 | Unassigned | Unassigned | Unassigned | 274_0  | Clustered           | 2 VC_274_0  | 2  | 0.0799 | 0.953709   | 0.0762 | 0 | 0 | 0 | 1 Ref      |
| AJ505558 | Unassigned | Unassigned | Unassigned | 423_0  | Clustered           | 45 VC_423_0 | 45 | 0.9484 | 1          | 0.9484 | 0 | 0 | 0 | 1 Ref      |
| AJ536073 | Unassigned | Unassigned | Unassigned | 424_0  | Clustered           | 7 VC_424_0  | 7  | 0.9044 | 0.9998143  | 0.9043 | 0 | 0 | 0 | 1 Ref      |
| AJ550635 | Unassigned | Unassigned | Unassigned | 198_0  | Clustered           | 28 VC_198_0 | 28 | 0.2429 | 0.99971175 | 0.2429 | 0 | 0 | 0 | 1 Ref      |
| AJ550940 | Unassigned | Unassigned | Unassigned | 373_0  | Clustered           | 10 VC_373_0 | 10 | 0.7471 | 1          | 0.7471 | 0 | 0 | 0 | 1 Ref      |
| AJ556162 | Unassigned | Unassigned | Unassigned | 41_0   | Clustered           | 16 VC_41_0  | 16 | 0.2025 | 1          | 0.2025 | 0 | 0 | 0 | 0.9667 Ref |
| AJ560763 | Unassigned | Unassigned | Unassigned | 426_0  | Clustered           | 2 VC_426_0  | 2  | 0.1976 | 0.95643941 | 0.189  | 0 | 0 | 0 | 1 Ref      |
| AJ604530 | Unassigned | Unassigned | Unassigned | 189_0  | Clustered           | 2 VC_189_0  | 2  | 0.0104 | 0.93953444 | 0.0097 | 0 | 0 | 0 | 1 Ref      |
| AJ604531 | Unassigned | Unassigned | Unassigned | 189_0  | Clustered           | 2 VC_189_0  | 2  | 0.0104 | 0.93953444 | 0.0097 | 0 | 0 | 0 | 1 Ref      |
| AJ609634 | Unassigned | Unassigned | Unassigned | 137_0  | Clustered           | 3 VC_137_0  | 3  | 0.1129 | 0.998547   | 0.1128 | 0 | 0 | 0 | 1 Ref      |
| AJ630128 | Unassigned | Unassigned | Unassigned | 433_5  | Clustered           | 2 VC_433_5  | 2  | 0.0173 | 0.93642158 | 0.0162 | 0 | 0 | 0 | 1 Ref      |
| AJ635161 | Unassigned | Unassigned | Unassigned | 440_0  | Clustered           | 4 VC_440_0  | 4  | 1      | 1          | 1      | 0 | 0 | 0 | 1 Ref      |
| AJ748296 | Unassigned | Unassigned | Unassigned | 348_0  | Clustered           | 22 VC_348_0 | 22 | 0.9602 | 1          | 0.9602 | 0 | 0 | 0 | 1 Ref      |
| AJ783769 | Unassigned | Unassigned | Unassigned | 444_0  | Clustered           | 2 VC_444_0  | 2  | 0.8137 | 0.72985431 | 0.5939 | 0 | 0 | 0 | 1 Ref      |
| AJ854042 | Unassigned | Unassigned | Unassigned | 350_0  | Clustered           | 2 VC_350_0  | 2  | 0.324  | 0.93865445 | 0.3041 | 0 | 0 | 0 | 1 Ref      |
| AJ875026 | Unassigned | Unassigned | Unassigned | 348_0  | Clustered           | 22 VC_348_0 | 22 | 0.9602 | 1          | 0.9602 | 0 | 0 | 0 | 1 Ref      |
| AJ888457 | Unassigned | Unassigned | Unassigned | 447_0  | Clustered           | 3 VC_447_0  | 3  | 0.8268 | 0.99509929 | 0.8227 | 0 | 0 | 0 | 1 Ref      |
| AJ969242 | Unassigned | Unassigned | Unassigned | 276_0  | Clustered           | 2 VC_276_0  | 2  | 1      | 1          | 1      | 0 | 0 | 0 | 1 Ref      |
| AM076770 | Unassigned | Unassigned | Unassigned | 450_0  | Clustered           | 16 VC_450_0 | 16 | 0.9564 | 1          | 0.9564 | 0 | 0 | 0 | 1 Ref      |
| AM084414 | Unassigned | Unassigned | Unassigned | 451_0  | Clustered           | 80 VC_451_0 | 80 | 0.9991 | 1          | 0.9991 | 0 | 0 | 0 | 1 Ref      |
| AM084415 | Unassigned | Unassigned | Unassigned | 452_0  | Clustered           | 66 VC_452_0 | 66 | 0.9248 | 1          | 0.9248 | 0 | 0 | 0 | 1 Ref      |
| AM087120 | Unassigned | Unassigned | Unassigned | 349_0  | Clustered           | 7 VC_349_0  | 7  | 0.9363 | 0.99999996 | 0.9363 | 0 | 0 | 0 | 1 Ref      |
| AM087121 | Unassigned | Unassigned | Unassigned | 349_0  | Clustered           | 7 VC_349_0  | 7  | 0.9363 | 0.99999996 | 0.9363 | 0 | 0 | 0 | 1 Ref      |
| AM087122 | Unassigned | Unassigned | Unassigned | 349_0  | Clustered           | 7 VC_349_0  | 7  | 0.9363 | 0.99999996 | 0.9363 | 0 | 0 | 0 | 1 Ref      |
| AM087123 | Unassigned | Unassigned | Unassigned | 349_0  | Clustered           | 7 VC_349_0  | 7  | 0.9363 | 0.99999996 | 0.9363 | 0 | 0 | 0 | 1 Ref      |
| AM156909 | Unassigned | Unassigned | Unassigned | 456_0  | Clustered           | 62 VC_456_0 | 62 | 0.9026 | 1          | 0.9026 | 0 | 0 | 0 | 1 Ref      |
| AM183667 | Unassigned | Unassigned | Unassigned | 386_0  | Clustered           | 49 VC_386_0 | 49 | 0.7941 | 1          | 0.7941 | 0 | 0 | 0 | 1 Ref      |
| AM265638 | Unassigned | Unassigned | Unassigned | 423_0  | Clustered           | 45 VC_423_0 | 45 | 0.9484 | 1          | 0.9484 | 0 | 0 | 0 | 1 Ref      |
| AM419438 | Unassigned | Unassigned | Unassigned | 351_0  | Clustered           | 3 VC_351_0  | 3  | 0.8899 | 0.98155579 | 0.8735 | 0 | 0 | 0 | 1 Ref      |
| AM491472 | Unassigned | Unassigned | Unassigned | 461_0  | Clustered           | 96 VC_461_0 | 96 | 0.9307 | 1          | 0.9307 | 0 | 0 | 0 | 0.9575 Ref |
| AM749121 | Unassigned | Unassigned | Unassigned | 463_0  | Clustered           | 4 VC_463_0  | 4  | 0.7906 | 0.99997156 | 0.7906 | 0 | 0 | 0 | 1 Ref      |
| AM749441 | Unassigned | Unassigned | Unassigned | 166_0  | Clustered           | 26 VC_166_0 | 26 | 0.7923 | 1          | 0.7923 | 0 | 0 | 0 | 1 Ref      |
| AM910650 | Unassigned | Unassigned | Unassigned | 472_0  | Clustered           | 47 VC_472_0 | 47 | 0.9025 | 1          | 0.9025 | 0 | 0 | 0 | 1 Ref      |
| AM910651 | Unassigned | Unassigned | Unassigned | 423_0  | Clustered           | 45 VC_423_0 | 45 | 0.9484 | 1          | 0.9484 | 0 | 0 | 0 | 1 Ref      |
| AP000363 | Unassigned | Unassigned | Unassigned | 39_0   | Clustered           | 35 VC_39_0  | 35 | 0.4337 | 1          | 0.4337 | 0 | 0 | 0 | 1 Ref      |
| AP000422 | Unassigned | Unassigned | Unassigned | 39_0   | Clustered           | 35 VC_39_0  | 35 | 0.4337 | 1          | 0.4337 | 0 | 0 | 0 | 1 Ref      |
| AP001553 | Unassigned | Unassigned | Unassigned | 12_2   | Clustered           | 19 VC_12_2  | 19 | 0.2018 | 1          | 0.2018 | 0 | 0 | 0 | 1 Ref      |
| AP004402 | Unassigned | Unassigned | Unassigned | 39_0   | Clustered           | 35 VC_39_0  | 35 | 0.4337 | 1          | 0.4337 | 0 | 0 | 0 | 1 Ref      |
| AP005153 | Unassigned | Unassigned | Unassigned | 39_0   | Clustered           | 35 VC_39_0  | 35 | 0.4337 | 1          | 0.4337 | 0 | 0 | 0 | 1 Ref      |
| AP005154 | Unassigned | Unassigned | Unassigned | 39_0   | Clustered           | 35 VC_39_0  | 35 | 0.4337 | 1          | 0.4337 | 0 | 0 | 0 | 1 Ref      |
| AP008953 | Unassigned | Unassigned | Unassigned | 9_0    | Clustered           | 38 VC_9_0   | 38 | 0.4895 | 1          | 0.4895 | 0 | 0 | 0 | 1 Ref      |
| AP008954 | Unassigned | Unassigned | Unassigned | 12_0   | Clustered           | 21 VC_12_0  | 21 | 0.2274 | 1          | 0.2274 | 0 | 0 | 0 | 0.9571 Ref |
| AP008979 | Unassigned | Unassigned | Unassigned | 113_0  | Clustered           | 9 VC_113_0  | 9  | 0.519  | 1          | 0.519  | 0 | 0 | 0 | 1 Ref      |
| AP008983 | Unassigned | Unassigned | Unassigned | 211_0  | Clustered/Singleton | 1 VC_211_0  | 1  | 0      | 1          | 0      | 0 | 0 | 0 | 1 Ref      |
| AP008986 | Unassigned | Unassigned | Unassigned | 364_0  | Clustered           | 16 VC_364_0 | 16 | 0.6491 | 1          | 0.6491 | 0 | 0 | 0 | 1 Ref      |
| AP009146 | Unassigned | Unassigned | Unassigned | 63_0   | Clustered           | 2 VC_63_0   | 2  | 0.1147 | 0.95689598 | 0.1098 | 0 | 0 | 0 | 1 Ref      |
| AP009363 | Unassigned | Unassigned | Unassigned | 8_0    | Clustered           | 58 VC_8_0   | 58 | 0.8306 | 1          | 0.8306 | 0 | 0 | 0 | 0.9946 Ref |
| AP009390 | Unassigned | Unassigned | Unassigned | 91_0   | Clustered           | 22 VC_91_0  | 22 | 0.5318 | 1          | 0.5318 | 0 | 0 | 0 | 1 Ref      |
| AP011113 | Unassigned | Unassigned | Unassigned | 283_10 | Clustered/Singleton | 1 VC_283_10 | 1  | 0      | 1          | 0      | 0 | 0 | 0 | 1 Ref      |
| AP011616 | Unassigned | Unassigned | Unassigned | 477_0  | Clustered           | 4 VC_477_0  | 4  | 0.9836 | 0.99748973 | 0.9811 | 0 | 0 | 0 | 1 Ref      |
| AP011617 | Unassigned | Unassigned | Unassigned | 477_0  | Clustered           | 4 VC_477_0  | 4  | 0.9836 | 0.99748973 | 0.9811 | 0 | 0 | 0 | 1 Ref      |
| AP011955 | Unassigned | Unassigned | Unassigned | 10_0   | Clustered           | 25 VC_10_0  | 25 | 0.3467 | 1          | 0.3467 | 0 | 0 | 0 | 0.9733 Ref |
| AP011956 | Unassigned | Unassigned | Unassigned | 10_0   | Clustered           | 25 VC_10_0  | 25 | 0.3467 | 1          | 0.3467 | 0 | 0 | 0 | 0.9733 Ref |
| AP012341 | Unassigned | Unassigned | Unassigned | 8_0    | Clustered           | 58 VC_8_0   | 58 | 0.8306 | 1          | 0.8306 | 0 | 0 | 0 | 0.9946 Ref |
| AP012529 | Unassigned | Unassigned | Unassigned | 39_0   | Clustered           | 35 VC_39_0  | 35 | 0.4337 | 1          | 0.4337 | 0 | 0 | 0 | 1 Ref      |
| AP012530 | Unassigned | Unassigned | Unassigned | 41_1   | Clustered           | 10 VC_41_1  | 10 | 0.1178 | 1          | 0.1178 | 0 | 0 | 0 | 0.8222 Ref |
| AP012531 | Unassigned | Unassigned | Unassigned | 39_0   | Clustered           | 35 VC_39_0  | 35 | 0.4337 | 1          | 0.4337 | 0 | 0 | 0 | 1 Ref      |
| AP012532 | Unassigned | Unassigned | Unassigned | 39_0   | Clustered           | 35 VC_39_0  | 35 | 0.4337 | 1          | 0.4337 | 0 | 0 | 0 | 1 Ref      |
| AP012534 | Unassigned | Unassigned | Unassigned | 42_0   | Clustered           | 49 VC_42_0  | 49 | 0.4517 | 1          | 0.4517 | 0 | 0 | 0 | 0.8597 Ref |
| AP012535 | Unassigned | Unassigned | Unassigned | 39_0   | Clustered           | 35 VC_39_0  | 35 | 0.4337 | 1          | 0.4337 | 0 | 0 | 0 | 1 Ref      |
| AP012538 | Unassigned | Unassigned | Unassigned | 41_1   | Clustered           | 10 VC_41_1  | 10 | 0.1178 | 1          | 0.1178 | 0 | 0 | 0 | 0.8222 Ref |
| AP012539 | Unassigned | Unassigned | Unassigned | 41_1   | Clustered           | 10 VC_41_1  | 10 | 0.1178 | 1          | 0.1178 | 0 | 0 | 0 | 0.8222 Ref |
| AP012540 | Unassigned | Unassigned | Unassigned | 41_1   | Clustered           | 10 VC_41_1  | 10 | 0.1178 | 1          | 0.1178 | 0 | 0 | 0 | 0.8222 Ref |
| AP013029 | Unassigned | Unassigned | Unassigned | 85_3   | Clustered           | 19 VC_85_3  | 19 | 0.3671 | 1          | 0.3671 | 0 | 0 | 0 | 0.807 Ref  |
| AP013538 | Unassigned | Unassigned | Unassigned | 340_0  | Clustered           | 31 VC_340_0 | 31 | 0.9549 | 1          | 0.9549 | 0 | 0 | 0 | 1 Ref      |
| AP013539 | Unassigned | Unassigned | Unassigned | 340_0  | Clustered           | 31 VC_340_0 | 31 | 0.9549 | 1          | 0.9549 | 0 | 0 | 0 | 1 Ref      |
| AP013541 | Unassigned | Unassigned | Unassigned | 480_0  | Clustered           | 19 VC_480_0 | 19 | 0.5445 | 1          | 0.5445 | 0 | 0 | 0 | 1 Ref      |
| AP013542 | Unassigned | Unassigned | Unassigned | 480_0  | Clustered           | 19 VC_480_0 | 19 | 0.5445 | 1          | 0.5445 | 0 | 0 | 0 | 1 Ref      |
| AP013544 | Unassigned | Unassigned | Unassigned | 481_0  | Clustered           | 8 VC_481_0  | 8  | 0.1348 | 1          | 0.1348 | 0 | 0 | 0 | 1 Ref      |
| AP013545 | Unassigned | Unassigned | Unassigned | 480_0  | Clustered           | 19 VC_480_0 | 19 | 0.5445 | 1          | 0.5445 | 0 | 0 | 0 | 1 Ref      |
| AP013546 | Unassigned | Unassigned | Unassigned | 482_0  | Clustered           | 4 VC_482_0  | 4  | 0.2975 | 0.99998416 | 0.2975 | 0 | 0 | 0 | 1 Ref      |
| AP013547 | Unassigned | Unassigned | Unassigned | 482_0  | Clustered           | 4 VC_482_0  | 4  | 0.2975 | 0.99998416 | 0.2975 | 0 | 0 | 0 | 1 Ref      |
| AP013548 | Unassigned | Unassigned | Unassigned | 482_0  | Clustered           | 4 VC_482_0  | 4  | 0.2975 | 0.99998416 | 0.2975 | 0 | 0 | 0 | 1 Ref      |
| AP014714 | Unassigned | Unassigned | Unassigned | 490_0  | Clustered           | 2 VC_490_0  | 2  | 0.0102 | 0.95344863 | 0.0097 | 0 | 0 | 0 | 1 Ref      |



|          |            |            |            |         |                     |              |     |        |            |        |   |   |   |            |
|----------|------------|------------|------------|---------|---------------------|--------------|-----|--------|------------|--------|---|---|---|------------|
| AP014715 | Unassigned | Unassigned | Unassigned | 490_0   | Clustered           | 2 VC_490_0   | 2   | 0.0102 | 0.95344863 | 0.0097 | 0 | 0 | 0 | 1 Ref      |
| AP014858 | Unassigned | Unassigned | Unassigned | 493_5   | Clustered/Singleton | 1 VC_493_5   | 1   | 0      | 1          | 0      | 0 | 0 | 0 | 1 Ref      |
| AP014887 | Unassigned | Unassigned | Unassigned | 498_0   | Clustered           | 8 VC_498_0   | 8   | 0.3987 | 1          | 0.3987 | 0 | 0 | 0 | 1 Ref      |
| AP014888 | Unassigned | Unassigned | Unassigned | 501_0   | Clustered           | 16 VC_501_0  | 16  | 0.9985 | 1          | 0.9985 | 0 | 0 | 0 | 1 Ref      |
| AP017924 | Unassigned | Unassigned | Unassigned | 345_0   | Clustered           | 2 VC_345_0   | 2   | 0.0685 | 0.95654153 | 0.0655 | 0 | 0 | 0 | 1 Ref      |
| AP017925 | Unassigned | Unassigned | Unassigned | 345_0   | Clustered           | 2 VC_345_0   | 2   | 0.0685 | 0.95654153 | 0.0655 | 0 | 0 | 0 | 1 Ref      |
| AP018361 | Unassigned | Unassigned | Unassigned | 272_0   | Clustered           | 11 VC_272_0  | 11  | 0.4915 | 1          | 0.4915 | 0 | 0 | 0 | 0.8727 Ref |
| AP018375 | Unassigned | Unassigned | Unassigned | 149_9   | Clustered           | 3 VC_149_9   | 3   | 0.0084 | 0.97854556 | 0.0082 | 0 | 0 | 0 | 1 Ref      |
| AP018399 | Unassigned | Unassigned | Unassigned | 68_0    | Clustered/Singleton | 1 VC_68_0    | 1   | 0      | 1          | 0      | 0 | 0 | 0 | 1 Ref      |
| AP018462 | Unassigned | Unassigned | Unassigned | 507_0   | Clustered           | 8 VC_507_0   | 8   | 0.4466 | 1          | 0.4466 | 0 | 0 | 0 | 1 Ref      |
| AP018463 | Unassigned | Unassigned | Unassigned | 507_0   | Clustered           | 8 VC_507_0   | 8   | 0.4466 | 1          | 0.4466 | 0 | 0 | 0 | 1 Ref      |
| AP018469 | Unassigned | Unassigned | Unassigned | 234_0   | Clustered           | 21 VC_234_0  | 21  | 0.8355 | 1          | 0.8355 | 0 | 0 | 0 | 1 Ref      |
| AP018470 | Unassigned | Unassigned | Unassigned | 234_0   | Clustered           | 21 VC_234_0  | 21  | 0.8355 | 1          | 0.8355 | 0 | 0 | 0 | 1 Ref      |
| AP018471 | Unassigned | Unassigned | Unassigned | 234_0   | Clustered           | 21 VC_234_0  | 21  | 0.8355 | 1          | 0.8355 | 0 | 0 | 0 | 1 Ref      |
| AP018476 | Unassigned | Unassigned | Unassigned | 215_1   | Clustered           | 19 VC_215_1  | 19  | 0.4188 | 1          | 0.4188 | 0 | 0 | 0 | 1 Ref      |
| AP018477 | Unassigned | Unassigned | Unassigned | 325_49  | Clustered           | 4 VC_325_49  | 4   | 0.014  | 0.99995965 | 0.014  | 0 | 0 | 0 | 1 Ref      |
| AP018478 | Unassigned | Unassigned | Unassigned | 325_49  | Clustered           | 4 VC_325_49  | 4   | 0.014  | 0.99995965 | 0.014  | 0 | 0 | 0 | 1 Ref      |
| AP018479 | Unassigned | Unassigned | Unassigned | 216_6   | Clustered           | 42 VC_216_6  | 42  | 0.473  | 1          | 0.473  | 0 | 0 | 0 | 0.8351 Ref |
| AP018480 | Unassigned | Unassigned | Unassigned | 215_1   | Clustered           | 19 VC_215_1  | 19  | 0.4188 | 1          | 0.4188 | 0 | 0 | 0 | 1 Ref      |
| AP018485 | Unassigned | Unassigned | Unassigned | 513_0   | Clustered           | 32 VC_513_0  | 32  | 0.6881 | 1          | 0.6881 | 0 | 0 | 0 | 1 Ref      |
| AP018487 | Unassigned | Unassigned | Unassigned | 518_0   | Clustered           | 6 VC_518_0   | 6   | 0.1295 | 1          | 0.1295 | 0 | 0 | 0 | 1 Ref      |
| AP018714 | Unassigned | Unassigned | Unassigned | 91_0    | Clustered           | 22 VC_91_0   | 22  | 0.5318 | 1          | 0.5318 | 0 | 0 | 0 | 1 Ref      |
| AP018715 | Unassigned | Unassigned | Unassigned | 91_0    | Clustered           | 22 VC_91_0   | 22  | 0.5318 | 1          | 0.5318 | 0 | 0 | 0 | 1 Ref      |
| AP018813 | Unassigned | Unassigned | Unassigned | 283_92  | Clustered           | 4 VC_283_92  | 4   | 0.0079 | 0.9999582  | 0.0079 | 0 | 0 | 0 | 1 Ref      |
| AP018814 | Unassigned | Unassigned | Unassigned | 283_88  | Clustered           | 2 VC_283_88  | 2   | 0.0026 | 0.95596547 | 0.0024 | 0 | 0 | 0 | 1 Ref      |
| AP018815 | Unassigned | Unassigned | Unassigned | 79_0    | Clustered           | 64 VC_79_0   | 64  | 0.4185 | 1          | 0.4185 | 0 | 0 | 0 | 0.7649 Ref |
| AP018932 | Unassigned | Unassigned | Unassigned | 283_187 | Clustered/Singleton | 1 VC_283_187 | 1   | 0      | 1          | 0      | 0 | 0 | 0 | 1 Ref      |
| AP019417 | Unassigned | Unassigned | Unassigned | 530_0   | Clustered           | 9 VC_530_0   | 9   | 0.8027 | 1          | 0.8027 | 0 | 0 | 0 | 1 Ref      |
| AP019418 | Unassigned | Unassigned | Unassigned | 344_0   | Clustered           | 21 VC_344_0  | 21  | 0.5436 | 1          | 0.5436 | 0 | 0 | 0 | 1 Ref      |
| AP019522 | Unassigned | Unassigned | Unassigned | 153_0   | Clustered           | 25 VC_153_0  | 25  | 0.7729 | 1          | 0.7729 | 0 | 0 | 0 | 1 Ref      |
| AP019524 | Unassigned | Unassigned | Unassigned | 532_0   | Clustered           | 2 VC_532_0   | 2   | 0.4046 | 0.89435023 | 0.3619 | 0 | 0 | 0 | 1 Ref      |
| AP019525 | Unassigned | Unassigned | Unassigned | 532_0   | Clustered           | 2 VC_532_0   | 2   | 0.4046 | 0.89435023 | 0.3619 | 0 | 0 | 0 | 1 Ref      |
| AP019527 | Unassigned | Unassigned | Unassigned | 534_0   | Clustered           | 9 VC_534_0   | 9   | 0.99   | 1          | 0.99   | 0 | 0 | 0 | 1 Ref      |
| AP019535 | Unassigned | Unassigned | Unassigned | 79_10   | Clustered/Singleton | 1 VC_79_10   | 1   | 0      | 1          | 0      | 0 | 0 | 0 | 1 Ref      |
| AP019559 | Unassigned | Unassigned | Unassigned | 190_17  | Clustered/Singleton | 1 VC_190_17  | 1   | 0      | 1          | 0      | 0 | 0 | 0 | 1 Ref      |
| AP019560 | Unassigned | Unassigned | Unassigned | 11_0    | Clustered           | 19 VC_11_0   | 19  | 0.7562 | 1          | 0.7562 | 0 | 0 | 0 | 1 Ref      |
| AP019561 | Unassigned | Unassigned | Unassigned | 11_0    | Clustered           | 19 VC_11_0   | 19  | 0.7562 | 1          | 0.7562 | 0 | 0 | 0 | 1 Ref      |
| AP019562 | Unassigned | Unassigned | Unassigned | 11_0    | Clustered           | 19 VC_11_0   | 19  | 0.7562 | 1          | 0.7562 | 0 | 0 | 0 | 1 Ref      |
| AY007505 | Unassigned | Unassigned | Unassigned | 317_2   | Clustered           | 20 VC_317_2  | 20  | 0.1976 | 1          | 0.1976 | 0 | 0 | 0 | 0.6842 Ref |
| AY027935 | Unassigned | Unassigned | Unassigned | 5_0     | Clustered           | 30 VC_5_0    | 30  | 0.9647 | 1          | 0.9647 | 0 | 0 | 0 | 1 Ref      |
| AY029185 | Unassigned | Unassigned | Unassigned | 278_0   | Clustered           | 3 VC_278_0   | 3   | 0.3052 | 0.99848877 | 0.3047 | 0 | 0 | 0 | 1 Ref      |
| AY048850 | Unassigned | Unassigned | Unassigned | 539_0   | Clustered           | 3 VC_539_0   | 3   | 1      | 1          | 1      | 0 | 0 | 0 | 1 Ref      |
| AY052766 | Unassigned | Unassigned | Unassigned | 28_1    | Clustered           | 53 VC_28_1   | 53  | 0.7164 | 1          | 0.7164 | 0 | 0 | 0 | 0.9325 Ref |
| AY055382 | Unassigned | Unassigned | Unassigned | 45_0    | Clustered           | 12 VC_45_0   | 12  | 0.35   | 1          | 0.35   | 0 | 0 | 0 | 1 Ref      |
| AY078382 | Unassigned | Unassigned | Unassigned | 472_0   | Clustered           | 47 VC_472_0  | 47  | 0.9025 | 1          | 0.9025 | 0 | 0 | 0 | 1 Ref      |
| AY129330 | Unassigned | Unassigned | Unassigned | 520_96  | Clustered/Singleton | 1 VC_520_96  | 1   | 0      | 1          | 0      | 0 | 0 | 0 | 1 Ref      |
| AY129331 | Unassigned | Unassigned | Unassigned | 551_7   | Clustered           | 28 VC_551_7  | 28  | 0.1661 | 1          | 0.1661 | 0 | 0 | 0 | 0.8519 Ref |
| AY129332 | Unassigned | Unassigned | Unassigned | 514_0   | Clustered           | 75 VC_514_0  | 75  | 0.9402 | 1          | 0.9402 | 0 | 0 | 0 | 1 Ref      |
| AY129333 | Unassigned | Unassigned | Unassigned | 518_1   | Clustered           | 2 VC_518_1   | 2   | 0.0376 | 0.95718761 | 0.036  | 0 | 0 | 0 | 1 Ref      |
| AY129334 | Unassigned | Unassigned | Unassigned | 508_0   | Clustered           | 32 VC_508_0  | 32  | 0.906  | 1          | 0.906  | 0 | 0 | 0 | 1 Ref      |
| AY129335 | Unassigned | Unassigned | Unassigned | 556_0   | Clustered           | 21 VC_556_0  | 21  | 0.9912 | 1          | 0.9912 | 0 | 0 | 0 | 1 Ref      |
| AY129337 | Unassigned | Unassigned | Unassigned | 558_8   | Clustered           | 2 VC_558_8   | 2   | 0.0032 | 0.68030512 | 0.0022 | 0 | 0 | 0 | 1 Ref      |
| AY129338 | Unassigned | Unassigned | Unassigned | 546_10  | Clustered/Singleton | 1 VC_546_10  | 1   | 0      | 1          | 0      | 0 | 0 | 0 | 1 Ref      |
| AY129339 | Unassigned | Unassigned | Unassigned | 566_0   | Clustered           | 2 VC_566_0   | 2   | 0.0989 | 0.95622526 | 0.0945 | 0 | 0 | 0 | 1 Ref      |
| AY131267 | Unassigned | Unassigned | Unassigned | 272_0   | Clustered           | 11 VC_272_0  | 11  | 0.4915 | 1          | 0.4915 | 0 | 0 | 0 | 0.8727 Ref |
| AY133112 | Unassigned | Unassigned | Unassigned | 23_0    | Clustered           | 3 VC_23_0    | 3   | 0.4305 | 0.99837378 | 0.4298 | 0 | 0 | 0 | 1 Ref      |
| AY135486 | Unassigned | Unassigned | Unassigned | 228_0   | Clustered           | 60 VC_228_0  | 60  | 0.942  | 1          | 0.942  | 0 | 0 | 0 | 1 Ref      |
| AY135739 | Unassigned | Unassigned | Unassigned | 228_0   | Clustered           | 60 VC_228_0  | 60  | 0.942  | 1          | 0.942  | 0 | 0 | 0 | 1 Ref      |
| AY150271 | Unassigned | Unassigned | Unassigned | 476_0   | Clustered           | 19 VC_476_0  | 19  | 0.7814 | 1          | 0.7814 | 0 | 0 | 0 | 1 Ref      |
| AY176327 | Unassigned | Unassigned | Unassigned | 149_8   | Clustered           | 66 VC_149_8  | 66  | 0.4565 | 1          | 0.4565 | 0 | 0 | 0 | 0.8182 Ref |
| AY190604 | Unassigned | Unassigned | Unassigned | 310_0   | Clustered           | 33 VC_310_0  | 33  | 0.8771 | 1          | 0.8771 | 0 | 0 | 0 | 1 Ref      |
| AY212251 | Unassigned | Unassigned | Unassigned | 97_0    | Clustered           | 5 VC_97_0    | 5   | 0.0696 | 0.98113835 | 0.0683 | 0 | 0 | 0 | 1 Ref      |
| AY216660 | Unassigned | Unassigned | Unassigned | 575_0   | Clustered           | 35 VC_575_0  | 35  | 0.8815 | 1          | 0.8815 | 0 | 0 | 0 | 1 Ref      |
| AY236756 | Unassigned | Unassigned | Unassigned | 577_0   | Clustered           | 6 VC_577_0   | 6   | 0.9267 | 0.99999993 | 0.9267 | 0 | 0 | 0 | 1 Ref      |
| AY242528 | Unassigned | Unassigned | Unassigned | 16_0    | Clustered           | 12 VC_16_0   | 12  | 0.6615 | 1          | 0.6615 | 0 | 0 | 0 | 1 Ref      |
| AY247822 | Unassigned | Unassigned | Unassigned | 392_0   | Clustered           | 126 VC_392_0 | 126 | 0.9621 | 1          | 0.9621 | 0 | 0 | 0 | 1 Ref      |
| AY251033 | Unassigned | Unassigned | Unassigned | 228_0   | Clustered           | 60 VC_228_0  | 60  | 0.942  | 1          | 0.942  | 0 | 0 | 0 | 1 Ref      |
| AY257527 | Unassigned | Unassigned | Unassigned | 424_0   | Clustered           | 7 VC_424_0   | 7   | 0.9044 | 0.9998143  | 0.9043 | 0 | 0 | 0 | 1 Ref      |
| AY264774 | Unassigned | Unassigned | Unassigned | 392_0   | Clustered           | 126 VC_392_0 | 126 | 0.9621 | 1          | 0.9621 | 0 | 0 | 0 | 1 Ref      |
| AY264775 | Unassigned | Unassigned | Unassigned | 392_0   | Clustered           | 126 VC_392_0 | 126 | 0.9621 | 1          | 0.9621 | 0 | 0 | 0 | 1 Ref      |
| AY264776 | Unassigned | Unassigned | Unassigned | 392_0   | Clustered           | 126 VC_392_0 | 126 | 0.9621 | 1          | 0.9621 | 0 | 0 | 0 | 1 Ref      |
| AY264777 | Unassigned | Unassigned | Unassigned | 392_0   | Clustered           | 126 VC_392_0 | 126 | 0.9621 | 1          | 0.9621 | 0 | 0 | 0 | 1 Ref      |
| AY264778 | Unassigned | Unassigned | Unassigned | 392_0   | Clustered           | 126 VC_392_0 | 126 | 0.9621 | 1          | 0.9621 | 0 | 0 | 0 | 1 Ref      |
| AY283928 | Unassigned | Unassigned | Unassigned | 531_1   | Clustered           | 6 VC_531_1   | 6   | 0.1481 | 0.99978665 | 0.148  | 0 | 0 | 0 | 1 Ref      |
| AY288927 | Unassigned | Unassigned | Unassigned | 452_0   | Clustered           | 66 VC_452_0  | 66  | 0.9248 | 1          | 0.9248 | 0 | 0 | 0 | 1 Ref      |
| AY299121 | Unassigned | Unassigned | Unassigned | 113_0   | Clustered           | 9 VC_113_0   | 9   | 0.519  | 1          | 0.519  | 0 | 0 | 0 | 1 Ref      |
| AY303349 | Unassigned | Unassigned | Unassigned | 286_10  | Clustered           | 9 VC_286_10  | 9   | 0.0615 | 0.99999878 | 0.0615 | 0 | 0 | 0 | 0.6667 Ref |
| AY308796 | Unassigned | Unassigned | Unassigned | 584_0   | Clustered           | 28 VC_584_0  | 28  | 0.7704 | 1          | 0.7704 | 0 | 0 | 0 | 1 Ref      |
| AY319521 | Unassigned | Unassigned | Unassigned | 6_0     | Clustered           | 44 VC_6_0    | 44  | 0.908  | 1          | 0.908  | 0 | 0 | 0 | 1 Ref      |
| AY320035 | Unassigned | Unassigned | Unassigned | 587_0   | Clustered           | 2 VC_587_0   | 2   | 0.3252 | 0.91192888 | 0.2965 | 0 | 0 | 0 | 1 Ref      |
| AY324828 | Unassigned | Unassigned | Unassigned | 589_0   | Clustered           | 2 VC_589_0   | 2   | 1      | 1          | 1      | 0 | 0 | 0 | 1 Ref      |



|          |            |            |            |        |                     |              |     |        |            |        |   |   |   |            |
|----------|------------|------------|------------|--------|---------------------|--------------|-----|--------|------------|--------|---|---|---|------------|
| AY328852 | Unassigned | Unassigned | Unassigned | 498_0  | Clustered           | 8 VC_498_0   | 8   | 0.3987 | 1          | 0.3987 | 0 | 0 | 0 | 1 Ref      |
| AY328853 | Unassigned | Unassigned | Unassigned | 498_0  | Clustered           | 8 VC_498_0   | 8   | 0.3987 | 1          | 0.3987 | 0 | 0 | 0 | 1 Ref      |
| AY343333 | Unassigned | Unassigned | Unassigned | 590_0  | Clustered           | 27 VC_590_0  | 27  | 0.9947 | 1          | 0.9947 | 0 | 0 | 0 | 1 Ref      |
| AY349011 | Unassigned | Unassigned | Unassigned | 162_0  | Clustered           | 18 VC_162_0  | 18  | 0.7403 | 1          | 0.7403 | 0 | 0 | 0 | 0.8627 Ref |
| AY370673 | Unassigned | Unassigned | Unassigned | 452_0  | Clustered           | 66 VC_452_0  | 66  | 0.9248 | 1          | 0.9248 | 0 | 0 | 0 | 1 Ref      |
| AY370674 | Unassigned | Unassigned | Unassigned | 452_0  | Clustered           | 66 VC_452_0  | 66  | 0.9248 | 1          | 0.9248 | 0 | 0 | 0 | 1 Ref      |
| AY370762 | Unassigned | Unassigned | Unassigned | 599_0  | Clustered           | 50 VC_599_0  | 50  | 0.9989 | 1          | 0.9989 | 0 | 0 | 0 | 1 Ref      |
| AY374448 | Unassigned | Unassigned | Unassigned | 34_0   | Clustered           | 4 VC_34_0    | 4   | 0.4349 | 0.99998062 | 0.4349 | 0 | 0 | 0 | 1 Ref      |
| AY375531 | Unassigned | Unassigned | Unassigned | 600_1  | Clustered           | 7 VC_600_1   | 7   | 0.1837 | 0.99999997 | 0.1837 | 0 | 0 | 0 | 1 Ref      |
| AY388628 | Unassigned | Unassigned | Unassigned | 599_0  | Clustered           | 50 VC_599_0  | 50  | 0.9989 | 1          | 0.9989 | 0 | 0 | 0 | 1 Ref      |
| AY394005 | Unassigned | Unassigned | Unassigned | 179_0  | Clustered           | 53 VC_179_0  | 53  | 0.9137 | 1          | 0.9137 | 0 | 0 | 0 | 1 Ref      |
| AY423772 | Unassigned | Unassigned | Unassigned | 599_0  | Clustered           | 50 VC_599_0  | 50  | 0.9989 | 1          | 0.9989 | 0 | 0 | 0 | 1 Ref      |
| AY441783 | Unassigned | Unassigned | Unassigned | 603_0  | Clustered           | 9 VC_603_0   | 9   | 0.9925 | 0.99999994 | 0.9925 | 0 | 0 | 0 | 1 Ref      |
| AY453853 | Unassigned | Unassigned | Unassigned | 353_0  | Clustered           | 6 VC_353_0   | 6   | 0.545  | 1          | 0.545  | 0 | 0 | 0 | 1 Ref      |
| AY500152 | Unassigned | Unassigned | Unassigned | 325_5  | Clustered           | 11 VC_325_5  | 11  | 0.047  | 1          | 0.047  | 0 | 0 | 0 | 0.7636 Ref |
| AY500153 | Unassigned | Unassigned | Unassigned | 325_9  | Clustered           | 2 VC_325_9   | 2   | 0.0055 | 0.95750934 | 0.0053 | 0 | 0 | 0 | 1 Ref      |
| AY505112 | Unassigned | Unassigned | Unassigned | 607_0  | Clustered           | 16 VC_607_0  | 16  | 0.9179 | 1          | 0.9179 | 0 | 0 | 0 | 1 Ref      |
| AY508486 | Unassigned | Unassigned | Unassigned | 10_0   | Clustered           | 25 VC_10_0   | 25  | 0.3467 | 1          | 0.3467 | 0 | 0 | 0 | 0.9733 Ref |
| AY510084 | Unassigned | Unassigned | Unassigned | 607_0  | Clustered           | 16 VC_607_0  | 16  | 0.9179 | 1          | 0.9179 | 0 | 0 | 0 | 1 Ref      |
| AY526908 | Unassigned | Unassigned | Unassigned | 278_0  | Clustered           | 3 VC_278_0   | 3   | 0.3052 | 0.99848877 | 0.3047 | 0 | 0 | 0 | 1 Ref      |
| AY526909 | Unassigned | Unassigned | Unassigned | 278_0  | Clustered           | 3 VC_278_0   | 3   | 0.3052 | 0.99848877 | 0.3047 | 0 | 0 | 0 | 1 Ref      |
| AY539836 | Unassigned | Unassigned | Unassigned | 250_0  | Clustered           | 4 VC_250_0   | 4   | 0.2395 | 0.99998241 | 0.2395 | 0 | 0 | 0 | 1 Ref      |
| AY543070 | Unassigned | Unassigned | Unassigned | 190_38 | Clustered           | 3 VC_190_38  | 3   | 0.0175 | 0.99847952 | 0.0174 | 0 | 0 | 0 | 1 Ref      |
| AY569307 | Unassigned | Unassigned | Unassigned | 611_0  | Clustered           | 2 VC_611_0   | 2   | 1      | 1          | 1      | 0 | 0 | 0 | 1 Ref      |
| AY575774 | Unassigned | Unassigned | Unassigned | 612_0  | Clustered           | 9 VC_612_0   | 9   | 0.9545 | 1          | 0.9545 | 0 | 0 | 0 | 1 Ref      |
| AY583234 | Unassigned | Unassigned | Unassigned | 246_0  | Clustered           | 3 VC_246_0   | 3   | 0.7624 | 0.9595722  | 0.7316 | 0 | 0 | 0 | 1 Ref      |
| AY583235 | Unassigned | Unassigned | Unassigned | 246_0  | Clustered           | 3 VC_246_0   | 3   | 0.7624 | 0.9595722  | 0.7316 | 0 | 0 | 0 | 1 Ref      |
| AY583236 | Unassigned | Unassigned | Unassigned | 246_0  | Clustered           | 3 VC_246_0   | 3   | 0.7624 | 0.9595722  | 0.7316 | 0 | 0 | 0 | 1 Ref      |
| AY587007 | Unassigned | Unassigned | Unassigned | 190_38 | Clustered           | 3 VC_190_38  | 3   | 0.0175 | 0.99847952 | 0.0174 | 0 | 0 | 0 | 1 Ref      |
| AY605066 | Unassigned | Unassigned | Unassigned | 272_0  | Clustered           | 11 VC_272_0  | 11  | 0.4915 | 1          | 0.4915 | 0 | 0 | 0 | 0.8727 Ref |
| AY605181 | Unassigned | Unassigned | Unassigned | 279_0  | Clustered           | 2 VC_279_0   | 2   | 0.1888 | 0.95124665 | 0.1796 | 0 | 0 | 0 | 1 Ref      |
| AY625898 | Unassigned | Unassigned | Unassigned | 630_0  | Clustered           | 20 VC_630_0  | 20  | 0.8513 | 1          | 0.8513 | 0 | 0 | 0 | 1 Ref      |
| AY682195 | Unassigned | Unassigned | Unassigned | 526_2  | Clustered/Singleton | 1 VC_526_2   | 1   | 0      | 1          | 0      | 0 | 0 | 0 | 1 Ref      |
| AY692264 | Unassigned | Unassigned | Unassigned | 190_38 | Clustered           | 3 VC_190_38  | 3   | 0.0175 | 0.99847952 | 0.0174 | 0 | 0 | 0 | 1 Ref      |
| AY699705 | Unassigned | Unassigned | Unassigned | 254_0  | Clustered           | 46 VC_254_0  | 46  | 0.5159 | 1          | 0.5159 | 0 | 0 | 0 | 1 Ref      |
| AY701338 | Unassigned | Unassigned | Unassigned | 424_0  | Clustered           | 7 VC_424_0   | 7   | 0.9044 | 0.9998143  | 0.9043 | 0 | 0 | 0 | 1 Ref      |
| AY714348 | Unassigned | Unassigned | Unassigned | 26_0   | Clustered           | 4 VC_26_0    | 4   | 0.7433 | 0.99936153 | 0.7428 | 0 | 0 | 0 | 1 Ref      |
| AY722806 | Unassigned | Unassigned | Unassigned | 440_0  | Clustered           | 4 VC_440_0   | 4   | 1      | 1          | 1      | 0 | 0 | 0 | 1 Ref      |
| AY730274 | Unassigned | Unassigned | Unassigned | 637_0  | Clustered           | 115 VC_637_0 | 115 | 0.731  | 1          | 0.731  | 0 | 0 | 0 | 0.8764 Ref |
| AY739900 | Unassigned | Unassigned | Unassigned | 640_0  | Clustered           | 7 VC_640_0   | 7   | 0.9025 | 1          | 0.9025 | 0 | 0 | 0 | 1 Ref      |
| AY751298 | Unassigned | Unassigned | Unassigned | 360_0  | Clustered           | 358 VC_360_0 | 358 | 0.9615 | 1          | 0.9615 | 0 | 0 | 0 | 1 Ref      |
| AY769964 | Unassigned | Unassigned | Unassigned | 198_0  | Clustered           | 28 VC_198_0  | 28  | 0.2429 | 0.99971175 | 0.2429 | 0 | 0 | 0 | 1 Ref      |
| AY772740 | Unassigned | Unassigned | Unassigned | 642_2  | Clustered           | 6 VC_642_2   | 6   | 0.1679 | 1          | 0.1679 | 0 | 0 | 0 | 1 Ref      |
| AY848684 | Unassigned | Unassigned | Unassigned | 603_0  | Clustered           | 9 VC_603_0   | 9   | 0.9925 | 0.99999994 | 0.9925 | 0 | 0 | 0 | 1 Ref      |
| AY848685 | Unassigned | Unassigned | Unassigned | 603_0  | Clustered           | 9 VC_603_0   | 9   | 0.9925 | 0.99999994 | 0.9925 | 0 | 0 | 0 | 1 Ref      |
| AY848686 | Unassigned | Unassigned | Unassigned | 603_0  | Clustered           | 9 VC_603_0   | 9   | 0.9925 | 0.99999994 | 0.9925 | 0 | 0 | 0 | 1 Ref      |
| AY848687 | Unassigned | Unassigned | Unassigned | 603_0  | Clustered           | 9 VC_603_0   | 9   | 0.9925 | 0.99999994 | 0.9925 | 0 | 0 | 0 | 1 Ref      |
| AY848688 | Unassigned | Unassigned | Unassigned | 603_0  | Clustered           | 9 VC_603_0   | 9   | 0.9925 | 0.99999994 | 0.9925 | 0 | 0 | 0 | 1 Ref      |
| AY848689 | Unassigned | Unassigned | Unassigned | 603_0  | Clustered           | 9 VC_603_0   | 9   | 0.9925 | 0.99999994 | 0.9925 | 0 | 0 | 0 | 1 Ref      |
| AY855346 | Unassigned | Unassigned | Unassigned | 139_0  | Clustered           | 2 VC_139_0   | 2   | 0.0701 | 0.95510185 | 0.067  | 0 | 0 | 0 | 1 Ref      |
| AY939843 | Unassigned | Unassigned | Unassigned | 340_0  | Clustered           | 31 VC_340_0  | 31  | 0.9549 | 1          | 0.9549 | 0 | 0 | 0 | 1 Ref      |
| AY939844 | Unassigned | Unassigned | Unassigned | 432_9  | Clustered           | 3 VC_432_9   | 3   | 0.0372 | 0.99851312 | 0.0371 | 0 | 0 | 0 | 1 Ref      |
| AY940168 | Unassigned | Unassigned | Unassigned | 655_2  | Clustered           | 3 VC_655_2   | 3   | 0.0231 | 0.99860756 | 0.0231 | 0 | 0 | 0 | 1 Ref      |
| AY950802 | Unassigned | Unassigned | Unassigned | 666_0  | Clustered           | 4 VC_666_0   | 4   | 1      | 1          | 1      | 0 | 0 | 0 | 1 Ref      |
| AY954949 | Unassigned | Unassigned | Unassigned | 96_0   | Clustered           | 30 VC_96_0   | 30  | 0.718  | 1          | 0.718  | 0 | 0 | 0 | 1 Ref      |
| AY954951 | Unassigned | Unassigned | Unassigned | 9_0    | Clustered           | 38 VC_9_0    | 38  | 0.4895 | 1          | 0.4895 | 0 | 0 | 0 | 1 Ref      |
| AY954952 | Unassigned | Unassigned | Unassigned | 9_0    | Clustered           | 38 VC_9_0    | 38  | 0.4895 | 1          | 0.4895 | 0 | 0 | 0 | 1 Ref      |
| AY954953 | Unassigned | Unassigned | Unassigned | 9_0    | Clustered           | 38 VC_9_0    | 38  | 0.4895 | 1          | 0.4895 | 0 | 0 | 0 | 1 Ref      |
| AY954954 | Unassigned | Unassigned | Unassigned | 15_1   | Clustered           | 9 VC_15_1    | 9   | 0.182  | 1          | 0.182  | 0 | 0 | 0 | 0.8889 Ref |
| AY954955 | Unassigned | Unassigned | Unassigned | 8_0    | Clustered           | 58 VC_8_0    | 58  | 0.8306 | 1          | 0.8306 | 0 | 0 | 0 | 0.9946 Ref |
| AY954956 | Unassigned | Unassigned | Unassigned | 8_0    | Clustered           | 58 VC_8_0    | 58  | 0.8306 | 1          | 0.8306 | 0 | 0 | 0 | 0.9946 Ref |
| AY954957 | Unassigned | Unassigned | Unassigned | 8_0    | Clustered           | 58 VC_8_0    | 58  | 0.8306 | 1          | 0.8306 | 0 | 0 | 0 | 0.9946 Ref |
| AY954960 | Unassigned | Unassigned | Unassigned | 12_0   | Clustered           | 21 VC_12_0   | 21  | 0.2274 | 1          | 0.2274 | 0 | 0 | 0 | 0.9571 Ref |
| AY954961 | Unassigned | Unassigned | Unassigned | 12_0   | Clustered           | 21 VC_12_0   | 21  | 0.2274 | 1          | 0.2274 | 0 | 0 | 0 | 0.9571 Ref |
| AY954962 | Unassigned | Unassigned | Unassigned | 12_2   | Clustered           | 19 VC_12_2   | 19  | 0.2018 | 1          | 0.2018 | 0 | 0 | 0 | 1 Ref      |
| AY954963 | Unassigned | Unassigned | Unassigned | 12_2   | Clustered           | 19 VC_12_2   | 19  | 0.2018 | 1          | 0.2018 | 0 | 0 | 0 | 1 Ref      |
| AY954964 | Unassigned | Unassigned | Unassigned | 12_2   | Clustered           | 19 VC_12_2   | 19  | 0.2018 | 1          | 0.2018 | 0 | 0 | 0 | 1 Ref      |
| AY954965 | Unassigned | Unassigned | Unassigned | 12_2   | Clustered           | 19 VC_12_2   | 19  | 0.2018 | 1          | 0.2018 | 0 | 0 | 0 | 1 Ref      |
| AY954966 | Unassigned | Unassigned | Unassigned | 12_2   | Clustered           | 19 VC_12_2   | 19  | 0.2018 | 1          | 0.2018 | 0 | 0 | 0 | 1 Ref      |
| AY954967 | Unassigned | Unassigned | Unassigned | 12_2   | Clustered           | 19 VC_12_2   | 19  | 0.2018 | 1          | 0.2018 | 0 | 0 | 0 | 1 Ref      |
| AY954968 | Unassigned | Unassigned | Unassigned | 12_2   | Clustered           | 19 VC_12_2   | 19  | 0.2018 | 1          | 0.2018 | 0 | 0 | 0 | 1 Ref      |
| AY954969 | Unassigned | Unassigned | Unassigned | 149_8  | Clustered           | 66 VC_149_8  | 66  | 0.4565 | 1          | 0.4565 | 0 | 0 | 0 | 0.8182 Ref |
| AY962392 | Unassigned | Unassigned | Unassigned | 600_1  | Clustered           | 7 VC_600_1   | 7   | 0.1837 | 0.99999997 | 0.1837 | 0 | 0 | 0 | 1 Ref      |
| AY967407 | Unassigned | Unassigned | Unassigned | 669_1  | Clustered           | 10 VC_669_1  | 10  | 0.1268 | 1          | 0.1268 | 0 | 0 | 0 | 0.9778 Ref |
| BIU32222 | Unassigned | Unassigned | Unassigned | 228_0  | Clustered           | 60 VC_228_0  | 60  | 0.942  | 1          | 0.942  | 0 | 0 | 0 | 1 Ref      |
| BCP1     | Unassigned | Unassigned | Unassigned | 672_0  | Clustered           | 12 VC_672_0  | 12  | 1      | 1          | 1      | 0 | 0 | 0 | 1 Ref      |
| BHU24159 | Unassigned | Unassigned | Unassigned | 5_0    | Clustered           | 30 VC_5_0    | 30  | 0.9647 | 1          | 0.9647 | 0 | 0 | 0 | 1 Ref      |
| BK000583 | Unassigned | Unassigned | Unassigned | 28_1   | Clustered           | 53 VC_28_1   | 53  | 0.7164 | 1          | 0.7164 | 0 | 0 | 0 | 0.9325 Ref |
| BK010471 | Unassigned | Unassigned | Unassigned | 673_0  | Clustered           | 15 VC_673_0  | 15  | 0.8234 | 1          | 0.8234 | 0 | 0 | 0 | 0.7619 Ref |
| BK010646 | Unassigned | Unassigned | Unassigned | 677_0  | Clustered           | 9 VC_677_0   | 9   | 0.3787 | 1          | 0.3787 | 0 | 0 | 0 | 0.8333 Ref |
| BK013337 | Unassigned | Unassigned | Unassigned | 539_0  | Clustered           | 3 VC_539_0   | 3   | 1      | 1          | 1      | 0 | 0 | 0 | 1 Ref      |



|                 |            |            |            |        |                     |              |     |        |            |        |   |   |   |            |
|-----------------|------------|------------|------------|--------|---------------------|--------------|-----|--------|------------|--------|---|---|---|------------|
| BK013338        | Unassigned | Unassigned | Unassigned | 539_0  | Clustered           | 3 VC_539_0   | 3   | 1      | 1          | 1      | 0 | 0 | 0 | 1 Ref      |
| BK013345        | Unassigned | Unassigned | Unassigned | 681_0  | Clustered           | 3 VC_681_0   | 3   | 0.9318 | 0.81445332 | 0.7589 | 0 | 0 | 0 | 1 Ref      |
| BK013346        | Unassigned | Unassigned | Unassigned | 681_0  | Clustered           | 3 VC_681_0   | 3   | 0.9318 | 0.81445332 | 0.7589 | 0 | 0 | 0 | 1 Ref      |
| BK013347        | Unassigned | Unassigned | Unassigned | 681_0  | Clustered           | 3 VC_681_0   | 3   | 0.9318 | 0.81445332 | 0.7589 | 0 | 0 | 0 | 1 Ref      |
| BK059895        | Unassigned | Unassigned | Unassigned | 682_0  | Clustered           | 2 VC_682_0   | 2   | 1      | 1          | 1      | 0 | 0 | 0 | 1 Ref      |
| BK061308        | Unassigned | Unassigned | Unassigned | 683_0  | Clustered           | 5 VC_683_0   | 5   | 0.8963 | 0.99999974 | 0.8963 | 0 | 0 | 0 | 1 Ref      |
| BK061309        | Unassigned | Unassigned | Unassigned | 683_0  | Clustered           | 5 VC_683_0   | 5   | 0.8963 | 0.99999974 | 0.8963 | 0 | 0 | 0 | 1 Ref      |
| BK061310        | Unassigned | Unassigned | Unassigned | 683_0  | Clustered           | 5 VC_683_0   | 5   | 0.8963 | 0.99999974 | 0.8963 | 0 | 0 | 0 | 1 Ref      |
| BK061311        | Unassigned | Unassigned | Unassigned | 683_0  | Clustered           | 5 VC_683_0   | 5   | 0.8963 | 0.99999974 | 0.8963 | 0 | 0 | 0 | 1 Ref      |
| BK061312        | Unassigned | Unassigned | Unassigned | 683_0  | Clustered           | 5 VC_683_0   | 5   | 0.8963 | 0.99999974 | 0.8963 | 0 | 0 | 0 | 1 Ref      |
| C2PVCG          | Unassigned | Unassigned | Unassigned | 690_0  | Clustered           | 50 VC_690_0  | 50  | 0.9805 | 1          | 0.9805 | 0 | 0 | 0 | 1 Ref      |
| CAJCJZ010000002 | Unassigned | Unassigned | Unassigned | 691_1  | Clustered           | 5 VC_691_1   | 5   | 0.4358 | 0.99999993 | 0.4358 | 0 | 0 | 0 | 1 Ref      |
| CAJDJX010000002 | Unassigned | Unassigned | Unassigned | 695_0  | Clustered           | 48 VC_695_0  | 48  | 0.8162 | 1          | 0.8162 | 0 | 0 | 0 | 1 Ref      |
| CAJDJY010000002 | Unassigned | Unassigned | Unassigned | 91_0   | Clustered           | 22 VC_91_0   | 22  | 0.5318 | 1          | 0.5318 | 0 | 0 | 0 | 1 Ref      |
| CAJDJZ010000002 | Unassigned | Unassigned | Unassigned | 91_0   | Clustered           | 22 VC_91_0   | 22  | 0.5318 | 1          | 0.5318 | 0 | 0 | 0 | 1 Ref      |
| CAJDKA010000002 | Unassigned | Unassigned | Unassigned | 92_0   | Clustered           | 22 VC_92_0   | 22  | 0.5639 | 1          | 0.5639 | 0 | 0 | 0 | 1 Ref      |
| CAJDKF010000002 | Unassigned | Unassigned | Unassigned | 695_0  | Clustered           | 48 VC_695_0  | 48  | 0.8162 | 1          | 0.8162 | 0 | 0 | 0 | 1 Ref      |
| CAKLQA020000001 | Unassigned | Unassigned | Unassigned | 696_1  | Clustered           | 8 VC_696_1   | 8   | 0.5452 | 1          | 0.5452 | 0 | 0 | 0 | 0.9286 Ref |
| CAKLQA020000002 | Unassigned | Unassigned | Unassigned | 670_0  | Clustered           | 2 VC_670_0   | 2   | 0.6875 | 0.72985431 | 0.5018 | 0 | 0 | 0 | 1 Ref      |
| CAKLQA020000003 | Unassigned | Unassigned | Unassigned | 615_0  | Clustered           | 2 VC_615_0   | 2   | 0.2668 | 0.94178001 | 0.2513 | 0 | 0 | 0 | 1 Ref      |
| CAKLQB020000001 | Unassigned | Unassigned | Unassigned | 699_0  | Clustered           | 71 VC_699_0  | 71  | 0.9352 | 1          | 0.9352 | 0 | 0 | 0 | 1 Ref      |
| CAKLQC020000001 | Unassigned | Unassigned | Unassigned | 492_1  | Clustered           | 20 VC_492_1  | 20  | 0.4176 | 1          | 0.4176 | 0 | 0 | 0 | 1 Ref      |
| CAKLQD020000001 | Unassigned | Unassigned | Unassigned | 492_1  | Clustered           | 20 VC_492_1  | 20  | 0.4176 | 1          | 0.4176 | 0 | 0 | 0 | 1 Ref      |
| CAKLQE020000001 | Unassigned | Unassigned | Unassigned | 701_2  | Clustered/Singleton | 1 VC_701_2   | 1   | 0      | 1          | 0      | 0 | 0 | 0 | 1 Ref      |
| CAKLQG020000001 | Unassigned | Unassigned | Unassigned | 699_0  | Clustered           | 71 VC_699_0  | 71  | 0.9352 | 1          | 0.9352 | 0 | 0 | 0 | 1 Ref      |
| CMU41758        | Unassigned | Unassigned | Unassigned | 197_0  | Clustered           | 5 VC_197_0   | 5   | 0.1324 | 0.84698401 | 0.1122 | 0 | 0 | 0 | 1 Ref      |
| CP00315         | Unassigned | Unassigned | Unassigned | 19_0   | Clustered           | 2 VC_19_0    | 2   | 0.0418 | 0.92044806 | 0.0385 | 0 | 0 | 0 | 1 Ref      |
| CP00622         | Unassigned | Unassigned | Unassigned | 250_0  | Clustered           | 4 VC_250_0   | 4   | 0.2395 | 0.99998241 | 0.2395 | 0 | 0 | 0 | 1 Ref      |
| CP00623         | Unassigned | Unassigned | Unassigned | 3_0    | Clustered           | 17 VC_3_0    | 17  | 0.5639 | 1          | 0.5639 | 0 | 0 | 0 | 1 Ref      |
| CP00624         | Unassigned | Unassigned | Unassigned | 3_0    | Clustered           | 17 VC_3_0    | 17  | 0.5639 | 1          | 0.5639 | 0 | 0 | 0 | 1 Ref      |
| CP00625         | Unassigned | Unassigned | Unassigned | 353_0  | Clustered           | 6 VC_353_0   | 6   | 0.545  | 1          | 0.545  | 0 | 0 | 0 | 1 Ref      |
| CP00711         | Unassigned | Unassigned | Unassigned | 30_1   | Clustered           | 16 VC_30_1   | 16  | 0.1973 | 1          | 0.1973 | 0 | 0 | 0 | 0.8333 Ref |
| CP00917         | Unassigned | Unassigned | Unassigned | 191_17 | Clustered           | 4 VC_191_17  | 4   | 0.0166 | 0.99930063 | 0.0166 | 0 | 0 | 0 | 0.8333 Ref |
| CP002495        | Unassigned | Unassigned | Unassigned | 706_0  | Clustered           | 2 VC_706_0   | 2   | 1      | 1          | 1      | 0 | 0 | 0 | 1 Ref      |
| CP004084        | Unassigned | Unassigned | Unassigned | 303_0  | Clustered           | 155 VC_303_0 | 155 | 0.9979 | 1          | 0.9979 | 0 | 0 | 0 | 1 Ref      |
| CP006891        | Unassigned | Unassigned | Unassigned | 55_0   | Clustered           | 3 VC_55_0    | 3   | 0.2818 | 0.99850111 | 0.2813 | 0 | 0 | 0 | 1 Ref      |
| CP008753        | Unassigned | Unassigned | Unassigned | 3_0    | Clustered           | 17 VC_3_0    | 17  | 0.5639 | 1          | 0.5639 | 0 | 0 | 0 | 1 Ref      |
| CP011970        | Unassigned | Unassigned | Unassigned | 473_2  | Clustered           | 2 VC_473_2   | 2   | 0.1022 | 0.94602228 | 0.0966 | 0 | 0 | 0 | 1 Ref      |
| CP013282        | Unassigned | Unassigned | Unassigned | 424_0  | Clustered           | 7 VC_424_0   | 7   | 0.9044 | 0.9998143  | 0.9043 | 0 | 0 | 0 | 1 Ref      |
| CP013974        | Unassigned | Unassigned | Unassigned | 426_1  | Clustered           | 3 VC_426_1   | 3   | 0.1152 | 0.99804615 | 0.1149 | 0 | 0 | 0 | 1 Ref      |
| CP017905        | Unassigned | Unassigned | Unassigned | 16_0   | Clustered           | 12 VC_16_0   | 12  | 0.6615 | 1          | 0.6615 | 0 | 0 | 0 | 1 Ref      |
| CP017906        | Unassigned | Unassigned | Unassigned | 16_0   | Clustered           | 12 VC_16_0   | 12  | 0.6615 | 1          | 0.6615 | 0 | 0 | 0 | 1 Ref      |
| CP019275        | Unassigned | Unassigned | Unassigned | 6_0    | Clustered           | 44 VC_6_0    | 44  | 0.908  | 1          | 0.908  | 0 | 0 | 0 | 1 Ref      |
| CP023680        | Unassigned | Unassigned | Unassigned | 55_0   | Clustered           | 3 VC_55_0    | 3   | 0.2818 | 0.99850111 | 0.2813 | 0 | 0 | 0 | 1 Ref      |
| CP023686        | Unassigned | Unassigned | Unassigned | 55_0   | Clustered           | 3 VC_55_0    | 3   | 0.2818 | 0.99850111 | 0.2813 | 0 | 0 | 0 | 1 Ref      |
| CP025874        | Unassigned | Unassigned | Unassigned | 229_0  | Clustered           | 32 VC_229_0  | 32  | 0.9119 | 1          | 0.9119 | 0 | 0 | 0 | 1 Ref      |
| CP025900        | Unassigned | Unassigned | Unassigned | 6_0    | Clustered           | 44 VC_6_0    | 44  | 0.908  | 1          | 0.908  | 0 | 0 | 0 | 1 Ref      |
| CP025901        | Unassigned | Unassigned | Unassigned | 229_0  | Clustered           | 32 VC_229_0  | 32  | 0.9119 | 1          | 0.9119 | 0 | 0 | 0 | 1 Ref      |
| CP025923        | Unassigned | Unassigned | Unassigned | 229_0  | Clustered           | 32 VC_229_0  | 32  | 0.9119 | 1          | 0.9119 | 0 | 0 | 0 | 1 Ref      |
| CP027117        | Unassigned | Unassigned | Unassigned | 720_1  | Clustered/Singleton | 1 VC_720_1   | 1   | 0      | 1          | 0      | 0 | 0 | 0 | 1 Ref      |
| CP038007        | Unassigned | Unassigned | Unassigned | 34_0   | Clustered           | 4 VC_34_0    | 4   | 0.4349 | 0.99998062 | 0.4349 | 0 | 0 | 0 | 1 Ref      |
| CP045566        | Unassigned | Unassigned | Unassigned | 721_0  | Clustered           | 9 VC_721_0   | 9   | 1      | 1          | 1      | 0 | 0 | 0 | 1 Ref      |
| CP051272        | Unassigned | Unassigned | Unassigned | 28_1   | Clustered           | 53 VC_28_1   | 53  | 0.7164 | 1          | 0.7164 | 0 | 0 | 0 | 0.9325 Ref |
| CP051278        | Unassigned | Unassigned | Unassigned | 28_1   | Clustered           | 53 VC_28_1   | 53  | 0.7164 | 1          | 0.7164 | 0 | 0 | 0 | 0.9325 Ref |
| CP051279        | Unassigned | Unassigned | Unassigned | 28_1   | Clustered           | 53 VC_28_1   | 53  | 0.7164 | 1          | 0.7164 | 0 | 0 | 0 | 0.9325 Ref |
| CP051285        | Unassigned | Unassigned | Unassigned | 28_1   | Clustered           | 53 VC_28_1   | 53  | 0.7164 | 1          | 0.7164 | 0 | 0 | 0 | 0.9325 Ref |
| CP051288        | Unassigned | Unassigned | Unassigned | 28_1   | Clustered           | 53 VC_28_1   | 53  | 0.7164 | 1          | 0.7164 | 0 | 0 | 0 | 0.9325 Ref |
| CP052639        | Unassigned | Unassigned | Unassigned | 229_0  | Clustered           | 32 VC_229_0  | 32  | 0.9119 | 1          | 0.9119 | 0 | 0 | 0 | 1 Ref      |
| CP053388        | Unassigned | Unassigned | Unassigned | 723_0  | Clustered           | 9 VC_723_0   | 9   | 0.7138 | 1          | 0.7138 | 0 | 0 | 0 | 1 Ref      |
| CP054387        | Unassigned | Unassigned | Unassigned | 723_0  | Clustered           | 9 VC_723_0   | 9   | 0.7138 | 1          | 0.7138 | 0 | 0 | 0 | 1 Ref      |
| CP058330        | Unassigned | Unassigned | Unassigned | 723_0  | Clustered           | 9 VC_723_0   | 9   | 0.7138 | 1          | 0.7138 | 0 | 0 | 0 | 1 Ref      |
| CP059058        | Unassigned | Unassigned | Unassigned | 591_0  | Clustered           | 14 VC_591_0  | 14  | 0.5184 | 1          | 0.5184 | 0 | 0 | 0 | 1 Ref      |
| CP060690        | Unassigned | Unassigned | Unassigned | 730_0  | Clustered           | 9 VC_730_0   | 9   | 1      | 1          | 1      | 0 | 0 | 0 | 1 Ref      |
| CP062422        | Unassigned | Unassigned | Unassigned | 12_0   | Clustered           | 21 VC_12_0   | 21  | 0.2274 | 1          | 0.2274 | 0 | 0 | 0 | 0.9571 Ref |
| CP062426        | Unassigned | Unassigned | Unassigned | 7_0    | Clustered           | 28 VC_7_0    | 28  | 0.3916 | 1          | 0.3916 | 0 | 0 | 0 | 0.9947 Ref |
| CP062427        | Unassigned | Unassigned | Unassigned | 9_0    | Clustered           | 38 VC_9_0    | 38  | 0.4895 | 1          | 0.4895 | 0 | 0 | 0 | 1 Ref      |
| CP062430        | Unassigned | Unassigned | Unassigned | 10_0   | Clustered           | 25 VC_10_0   | 25  | 0.3467 | 1          | 0.3467 | 0 | 0 | 0 | 0.9733 Ref |
| CP062434        | Unassigned | Unassigned | Unassigned | 8_0    | Clustered           | 58 VC_8_0    | 58  | 0.8306 | 1          | 0.8306 | 0 | 0 | 0 | 0.9946 Ref |
| CP062435        | Unassigned | Unassigned | Unassigned | 7_0    | Clustered           | 28 VC_7_0    | 28  | 0.3916 | 1          | 0.3916 | 0 | 0 | 0 | 0.9947 Ref |
| CP062436        | Unassigned | Unassigned | Unassigned | 10_0   | Clustered           | 25 VC_10_0   | 25  | 0.3467 | 1          | 0.3467 | 0 | 0 | 0 | 0.9733 Ref |
| CP062442        | Unassigned | Unassigned | Unassigned | 8_0    | Clustered           | 58 VC_8_0    | 58  | 0.8306 | 1          | 0.8306 | 0 | 0 | 0 | 0.9946 Ref |
| CP062444        | Unassigned | Unassigned | Unassigned | 8_0    | Clustered           | 58 VC_8_0    | 58  | 0.8306 | 1          | 0.8306 | 0 | 0 | 0 | 0.9946 Ref |
| CP062445        | Unassigned | Unassigned | Unassigned | 7_0    | Clustered           | 28 VC_7_0    | 28  | 0.3916 | 1          | 0.3916 | 0 | 0 | 0 | 0.9947 Ref |
| CP062447        | Unassigned | Unassigned | Unassigned | 10_0   | Clustered           | 25 VC_10_0   | 25  | 0.3467 | 1          | 0.3467 | 0 | 0 | 0 | 0.9733 Ref |
| CP062451        | Unassigned | Unassigned | Unassigned | 9_0    | Clustered           | 38 VC_9_0    | 38  | 0.4895 | 1          | 0.4895 | 0 | 0 | 0 | 1 Ref      |
| CP062454        | Unassigned | Unassigned | Unassigned | 9_0    | Clustered           | 38 VC_9_0    | 38  | 0.4895 | 1          | 0.4895 | 0 | 0 | 0 | 1 Ref      |
| CP062457        | Unassigned | Unassigned | Unassigned | 7_0    | Clustered           | 28 VC_7_0    | 28  | 0.3916 | 1          | 0.3916 | 0 | 0 | 0 | 0.9947 Ref |
| CP062461        | Unassigned | Unassigned | Unassigned | 8_0    | Clustered           | 58 VC_8_0    | 58  | 0.8306 | 1          | 0.8306 | 0 | 0 | 0 | 0.9946 Ref |
| CP062462        | Unassigned | Unassigned | Unassigned | 12_0   | Clustered           | 21 VC_12_0   | 21  | 0.2274 | 1          | 0.2274 | 0 | 0 | 0 | 0.9571 Ref |
| CP062992        | Unassigned | Unassigned | Unassigned | 491_0  | Clustered           | 36 VC_491_0  | 36  | 0.5336 | 1          | 0.5336 | 0 | 0 | 0 | 0.9714 Ref |
| CP067347        | Unassigned | Unassigned | Unassigned | 473_4  | Clustered/Singleton | 1 VC_473_4   | 1   | 0      | 1          | 0      | 0 | 0 | 0 | 1 Ref      |



|          |            |            |            |       |                     |              |     |        |            |        |   |   |   |            |
|----------|------------|------------|------------|-------|---------------------|--------------|-----|--------|------------|--------|---|---|---|------------|
| CP067352 | Unassigned | Unassigned | Unassigned | 473_0 | Clustered/Singleton | 1 VC_473_0   | 1   | 0      | 1          | 0      | 0 | 0 | 0 | 1 Ref      |
| CP069347 | Unassigned | Unassigned | Unassigned | 647_0 | Clustered           | 11 VC_647_0  | 11  | 0.598  | 1          | 0.598  | 0 | 0 | 0 | 1 Ref      |
| CP069348 | Unassigned | Unassigned | Unassigned | 473_1 | Clustered/Singleton | 1 VC_473_1   | 1   | 0      | 1          | 0      | 0 | 0 | 0 | 1 Ref      |
| CP071049 | Unassigned | Unassigned | Unassigned | 12_0  | Clustered           | 21 VC_12_0   | 21  | 0.2274 | 1          | 0.2274 | 0 | 0 | 0 | 0.9571 Ref |
| CP072507 | Unassigned | Unassigned | Unassigned | 34_0  | Clustered           | 4 VC_34_0    | 4   | 0.4349 | 0.99998062 | 0.4349 | 0 | 0 | 0 | 1 Ref      |
| CP091911 | Unassigned | Unassigned | Unassigned | 706_0 | Clustered           | 2 VC_706_0   | 2   | 1      | 1          | 1      | 0 | 0 | 0 | 1 Ref      |
| CP101890 | Unassigned | Unassigned | Unassigned | 723_0 | Clustered           | 9 VC_723_0   | 9   | 0.7138 | 1          | 0.7138 | 0 | 0 | 0 | 1 Ref      |
| CP101896 | Unassigned | Unassigned | Unassigned | 723_0 | Clustered           | 9 VC_723_0   | 9   | 0.7138 | 1          | 0.7138 | 0 | 0 | 0 | 1 Ref      |
| D89074   | Unassigned | Unassigned | Unassigned | 16_0  | Clustered           | 12 VC_16_0   | 12  | 0.6615 | 1          | 0.6615 | 0 | 0 | 0 | 1 Ref      |
| DQ003260 | Unassigned | Unassigned | Unassigned | 28_1  | Clustered           | 53 VC_28_1   | 53  | 0.7164 | 1          | 0.7164 | 0 | 0 | 0 | 0.9325 Ref |
| DQ003637 | Unassigned | Unassigned | Unassigned | 378_0 | Clustered           | 9 VC_378_0   | 9   | 0.7603 | 1          | 0.7603 | 0 | 0 | 0 | 1 Ref      |
| DQ003638 | Unassigned | Unassigned | Unassigned | 739_0 | Clustered           | 26 VC_739_0  | 26  | 0.9571 | 1          | 0.9571 | 0 | 0 | 0 | 1 Ref      |
| DQ003639 | Unassigned | Unassigned | Unassigned | 379_0 | Clustered           | 5 VC_379_0   | 5   | 0.4779 | 0.99999992 | 0.4779 | 0 | 0 | 0 | 0.9 Ref    |
| DQ003640 | Unassigned | Unassigned | Unassigned | 140_0 | Clustered           | 2 VC_140_0   | 2   | 0.4111 | 0.94824791 | 0.3898 | 0 | 0 | 0 | 1 Ref      |
| DQ003641 | Unassigned | Unassigned | Unassigned | 740_0 | Clustered           | 3 VC_740_0   | 3   | 0.202  | 0.99811828 | 0.2016 | 0 | 0 | 0 | 1 Ref      |
| DQ003642 | Unassigned | Unassigned | Unassigned | 380_0 | Clustered           | 3 VC_380_0   | 3   | 0.1631 | 0.99675097 | 0.1625 | 0 | 0 | 0 | 1 Ref      |
| DQ004855 | Unassigned | Unassigned | Unassigned | 739_0 | Clustered           | 26 VC_739_0  | 26  | 0.9571 | 1          | 0.9571 | 0 | 0 | 0 | 1 Ref      |
| DQ029335 | Unassigned | Unassigned | Unassigned | 82_0  | Clustered           | 24 VC_82_0   | 24  | 0.7351 | 1          | 0.7351 | 0 | 0 | 0 | 1 Ref      |
| DQ054536 | Unassigned | Unassigned | Unassigned | 202_0 | Clustered           | 102 VC_202_0 | 102 | 0.4049 | 1          | 0.4049 | 0 | 0 | 0 | 0.7876 Ref |
| DQ079870 | Unassigned | Unassigned | Unassigned | 743_0 | Clustered           | 15 VC_743_0  | 15  | 1      | 1          | 1      | 0 | 0 | 0 | 1 Ref      |
| DQ079871 | Unassigned | Unassigned | Unassigned | 743_0 | Clustered           | 15 VC_743_0  | 15  | 1      | 1          | 1      | 0 | 0 | 0 | 1 Ref      |
| DQ079872 | Unassigned | Unassigned | Unassigned | 743_0 | Clustered           | 15 VC_743_0  | 15  | 1      | 1          | 1      | 0 | 0 | 0 | 1 Ref      |
| DQ079873 | Unassigned | Unassigned | Unassigned | 743_0 | Clustered           | 15 VC_743_0  | 15  | 1      | 1          | 1      | 0 | 0 | 0 | 1 Ref      |
| DQ079874 | Unassigned | Unassigned | Unassigned | 743_0 | Clustered           | 15 VC_743_0  | 15  | 1      | 1          | 1      | 0 | 0 | 0 | 1 Ref      |
| DQ079875 | Unassigned | Unassigned | Unassigned | 743_0 | Clustered           | 15 VC_743_0  | 15  | 1      | 1          | 1      | 0 | 0 | 0 | 1 Ref      |
| DQ079876 | Unassigned | Unassigned | Unassigned | 743_0 | Clustered           | 15 VC_743_0  | 15  | 1      | 1          | 1      | 0 | 0 | 0 | 1 Ref      |
| DQ079878 | Unassigned | Unassigned | Unassigned | 743_0 | Clustered           | 15 VC_743_0  | 15  | 1      | 1          | 1      | 0 | 0 | 0 | 1 Ref      |
| DQ079879 | Unassigned | Unassigned | Unassigned | 743_0 | Clustered           | 15 VC_743_0  | 15  | 1      | 1          | 1      | 0 | 0 | 0 | 1 Ref      |
| DQ079880 | Unassigned | Unassigned | Unassigned | 303_0 | Clustered           | 155 VC_303_0 | 155 | 0.9979 | 1          | 0.9979 | 0 | 0 | 0 | 1 Ref      |
| DQ079881 | Unassigned | Unassigned | Unassigned | 303_0 | Clustered           | 155 VC_303_0 | 155 | 0.9979 | 1          | 0.9979 | 0 | 0 | 0 | 1 Ref      |
| DQ079882 | Unassigned | Unassigned | Unassigned | 303_0 | Clustered           | 155 VC_303_0 | 155 | 0.9979 | 1          | 0.9979 | 0 | 0 | 0 | 1 Ref      |
| DQ079883 | Unassigned | Unassigned | Unassigned | 303_0 | Clustered           | 155 VC_303_0 | 155 | 0.9979 | 1          | 0.9979 | 0 | 0 | 0 | 1 Ref      |
| DQ079884 | Unassigned | Unassigned | Unassigned | 303_0 | Clustered           | 155 VC_303_0 | 155 | 0.9979 | 1          | 0.9979 | 0 | 0 | 0 | 1 Ref      |
| DQ079885 | Unassigned | Unassigned | Unassigned | 303_0 | Clustered           | 155 VC_303_0 | 155 | 0.9979 | 1          | 0.9979 | 0 | 0 | 0 | 1 Ref      |
| DQ079886 | Unassigned | Unassigned | Unassigned | 303_0 | Clustered           | 155 VC_303_0 | 155 | 0.9979 | 1          | 0.9979 | 0 | 0 | 0 | 1 Ref      |
| DQ079887 | Unassigned | Unassigned | Unassigned | 303_0 | Clustered           | 155 VC_303_0 | 155 | 0.9979 | 1          | 0.9979 | 0 | 0 | 0 | 1 Ref      |
| DQ079888 | Unassigned | Unassigned | Unassigned | 303_0 | Clustered           | 155 VC_303_0 | 155 | 0.9979 | 1          | 0.9979 | 0 | 0 | 0 | 1 Ref      |
| DQ079889 | Unassigned | Unassigned | Unassigned | 303_0 | Clustered           | 155 VC_303_0 | 155 | 0.9979 | 1          | 0.9979 | 0 | 0 | 0 | 1 Ref      |
| DQ079890 | Unassigned | Unassigned | Unassigned | 303_0 | Clustered           | 155 VC_303_0 | 155 | 0.9979 | 1          | 0.9979 | 0 | 0 | 0 | 1 Ref      |
| DQ079891 | Unassigned | Unassigned | Unassigned | 303_0 | Clustered           | 155 VC_303_0 | 155 | 0.9979 | 1          | 0.9979 | 0 | 0 | 0 | 1 Ref      |
| DQ079892 | Unassigned | Unassigned | Unassigned | 303_0 | Clustered           | 155 VC_303_0 | 155 | 0.9979 | 1          | 0.9979 | 0 | 0 | 0 | 1 Ref      |
| DQ079893 | Unassigned | Unassigned | Unassigned | 303_0 | Clustered           | 155 VC_303_0 | 155 | 0.9979 | 1          | 0.9979 | 0 | 0 | 0 | 1 Ref      |
| DQ079894 | Unassigned | Unassigned | Unassigned | 303_0 | Clustered           | 155 VC_303_0 | 155 | 0.9979 | 1          | 0.9979 | 0 | 0 | 0 | 1 Ref      |
| DQ079895 | Unassigned | Unassigned | Unassigned | 303_0 | Clustered           | 155 VC_303_0 | 155 | 0.9979 | 1          | 0.9979 | 0 | 0 | 0 | 1 Ref      |
| DQ079896 | Unassigned | Unassigned | Unassigned | 360_0 | Clustered           | 358 VC_360_0 | 358 | 0.9615 | 1          | 0.9615 | 0 | 0 | 0 | 1 Ref      |
| DQ079897 | Unassigned | Unassigned | Unassigned | 360_0 | Clustered           | 358 VC_360_0 | 358 | 0.9615 | 1          | 0.9615 | 0 | 0 | 0 | 1 Ref      |
| DQ079899 | Unassigned | Unassigned | Unassigned | 360_0 | Clustered           | 358 VC_360_0 | 358 | 0.9615 | 1          | 0.9615 | 0 | 0 | 0 | 1 Ref      |
| DQ079900 | Unassigned | Unassigned | Unassigned | 360_0 | Clustered           | 358 VC_360_0 | 358 | 0.9615 | 1          | 0.9615 | 0 | 0 | 0 | 1 Ref      |
| DQ079901 | Unassigned | Unassigned | Unassigned | 360_0 | Clustered           | 358 VC_360_0 | 358 | 0.9615 | 1          | 0.9615 | 0 | 0 | 0 | 1 Ref      |
| DQ079902 | Unassigned | Unassigned | Unassigned | 360_0 | Clustered           | 358 VC_360_0 | 358 | 0.9615 | 1          | 0.9615 | 0 | 0 | 0 | 1 Ref      |
| DQ079903 | Unassigned | Unassigned | Unassigned | 360_0 | Clustered           | 358 VC_360_0 | 358 | 0.9615 | 1          | 0.9615 | 0 | 0 | 0 | 1 Ref      |
| DQ079904 | Unassigned | Unassigned | Unassigned | 360_0 | Clustered           | 358 VC_360_0 | 358 | 0.9615 | 1          | 0.9615 | 0 | 0 | 0 | 1 Ref      |
| DQ079906 | Unassigned | Unassigned | Unassigned | 360_0 | Clustered           | 358 VC_360_0 | 358 | 0.9615 | 1          | 0.9615 | 0 | 0 | 0 | 1 Ref      |
| DQ079908 | Unassigned | Unassigned | Unassigned | 360_0 | Clustered           | 358 VC_360_0 | 358 | 0.9615 | 1          | 0.9615 | 0 | 0 | 0 | 1 Ref      |
| DQ079909 | Unassigned | Unassigned | Unassigned | 360_0 | Clustered           | 358 VC_360_0 | 358 | 0.9615 | 1          | 0.9615 | 0 | 0 | 0 | 1 Ref      |
| DQ085810 | Unassigned | Unassigned | Unassigned | 743_0 | Clustered           | 15 VC_743_0  | 15  | 1      | 1          | 1      | 0 | 0 | 0 | 1 Ref      |
| DQ087285 | Unassigned | Unassigned | Unassigned | 3_0   | Clustered           | 17 VC_3_0    | 17  | 0.5639 | 1          | 0.5639 | 0 | 0 | 0 | 1 Ref      |
| DQ111067 | Unassigned | Unassigned | Unassigned | 451_0 | Clustered           | 80 VC_451_0  | 80  | 0.9991 | 1          | 0.9991 | 0 | 0 | 0 | 1 Ref      |
| DQ113772 | Unassigned | Unassigned | Unassigned | 412_0 | Clustered           | 39 VC_412_0  | 39  | 0.845  | 1          | 0.845  | 0 | 0 | 0 | 1 Ref      |
| DQ114220 | Unassigned | Unassigned | Unassigned | 5_0   | Clustered           | 30 VC_5_0    | 30  | 0.9647 | 1          | 0.9647 | 0 | 0 | 0 | 1 Ref      |
| DQ121662 | Unassigned | Unassigned | Unassigned | 455_0 | Clustered           | 18 VC_455_0  | 18  | 0.4598 | 1          | 0.4598 | 0 | 0 | 0 | 1 Ref      |
| DQ123818 | Unassigned | Unassigned | Unassigned | 744_0 | Clustered           | 10 VC_744_0  | 10  | 0.7049 | 1          | 0.7049 | 0 | 0 | 0 | 1 Ref      |
| DQ126339 | Unassigned | Unassigned | Unassigned | 476_0 | Clustered           | 19 VC_476_0  | 19  | 0.7814 | 1          | 0.7814 | 0 | 0 | 0 | 1 Ref      |
| DQ150593 | Unassigned | Unassigned | Unassigned | 704_0 | Clustered           | 16 VC_704_0  | 16  | 0.7274 | 1          | 0.7274 | 0 | 0 | 0 | 1 Ref      |
| DQ163912 | Unassigned | Unassigned | Unassigned | 747_0 | Clustered           | 23 VC_747_0  | 23  | 0.8202 | 1          | 0.8202 | 0 | 0 | 0 | 1 Ref      |
| DQ163913 | Unassigned | Unassigned | Unassigned | 749_0 | Clustered           | 40 VC_749_0  | 40  | 0.7517 | 1          | 0.7517 | 0 | 0 | 0 | 1 Ref      |
| DQ163914 | Unassigned | Unassigned | Unassigned | 612_0 | Clustered           | 9 VC_612_0   | 9   | 0.9545 | 1          | 0.9545 | 0 | 0 | 0 | 1 Ref      |
| DQ163915 | Unassigned | Unassigned | Unassigned | 755_0 | Clustered           | 9 VC_755_0   | 9   | 0.4489 | 1          | 0.4489 | 0 | 0 | 0 | 1 Ref      |
| DQ163916 | Unassigned | Unassigned | Unassigned | 166_0 | Clustered           | 26 VC_166_0  | 26  | 0.7923 | 1          | 0.7923 | 0 | 0 | 0 | 1 Ref      |
| DQ163917 | Unassigned | Unassigned | Unassigned | 80_0  | Clustered           | 41 VC_80_0   | 41  | 0.5837 | 1          | 0.5837 | 0 | 0 | 0 | 0.9805 Ref |
| DQ222851 | Unassigned | Unassigned | Unassigned | 704_0 | Clustered           | 16 VC_704_0  | 16  | 0.7274 | 1          | 0.7274 | 0 | 0 | 0 | 1 Ref      |
| DQ222853 | Unassigned | Unassigned | Unassigned | 704_0 | Clustered           | 16 VC_704_0  | 16  | 0.7274 | 1          | 0.7274 | 0 | 0 | 0 | 1 Ref      |
| DQ222855 | Unassigned | Unassigned | Unassigned | 704_0 | Clustered           | 16 VC_704_0  | 16  | 0.7274 | 1          | 0.7274 | 0 | 0 | 0 | 1 Ref      |
| DQ227763 | Unassigned | Unassigned | Unassigned | 202_0 | Clustered           | 102 VC_202_0 | 102 | 0.4049 | 1          | 0.4049 | 0 | 0 | 0 | 0.7876 Ref |
| DQ227764 | Unassigned | Unassigned | Unassigned | 202_0 | Clustered           | 102 VC_202_0 | 102 | 0.4049 | 1          | 0.4049 | 0 | 0 | 0 | 0.7876 Ref |
| DQ289555 | Unassigned | Unassigned | Unassigned | 704_0 | Clustered           | 16 VC_704_0  | 16  | 0.7274 | 1          | 0.7274 | 0 | 0 | 0 | 1 Ref      |
| DQ289556 | Unassigned | Unassigned | Unassigned | 704_0 | Clustered           | 16 VC_704_0  | 16  | 0.7274 | 1          | 0.7274 | 0 | 0 | 0 | 1 Ref      |
| DQ320509 | Unassigned | Unassigned | Unassigned | 308_0 | Clustered           | 4 VC_308_0   | 4   | 0.5014 | 0.99997418 | 0.5013 | 0 | 0 | 0 | 1 Ref      |
| DQ340064 | Unassigned | Unassigned | Unassigned | 138_0 | Clustered           | 2 VC_138_0   | 2   | 0.2009 | 0.95368907 | 0.1916 | 0 | 0 | 0 | 1 Ref      |
| DQ386162 | Unassigned | Unassigned | Unassigned | 463_0 | Clustered           | 4 VC_463_0   | 4   | 0.7906 | 0.99997156 | 0.7906 | 0 | 0 | 0 | 1 Ref      |
| DQ394807 | Unassigned | Unassigned | Unassigned | 265_0 | Clustered           | 12 VC_265_0  | 12  | 0.4401 | 1          | 0.4401 | 0 | 0 | 0 | 1 Ref      |



|          |            |            |            |        |                     |              |     |        |            |        |   |   |   |            |
|----------|------------|------------|------------|--------|---------------------|--------------|-----|--------|------------|--------|---|---|---|------------|
| DQ394808 | Unassigned | Unassigned | Unassigned | 265_0  | Clustered           | 12 VC_265_0  | 12  | 0.4401 | 1          | 0.4401 | 0 | 0 | 0 | 1 Ref      |
| DQ394809 | Unassigned | Unassigned | Unassigned | 265_0  | Clustered           | 12 VC_265_0  | 12  | 0.4401 | 1          | 0.4401 | 0 | 0 | 0 | 1 Ref      |
| DQ394810 | Unassigned | Unassigned | Unassigned | 265_0  | Clustered           | 12 VC_265_0  | 12  | 0.4401 | 1          | 0.4401 | 0 | 0 | 0 | 1 Ref      |
| DQ398041 | Unassigned | Unassigned | Unassigned | 551_7  | Clustered           | 28 VC_551_7  | 28  | 0.1661 | 1          | 0.1661 | 0 | 0 | 0 | 0.8519 Ref |
| DQ398042 | Unassigned | Unassigned | Unassigned | 761_0  | Clustered           | 67 VC_761_0  | 67  | 0.8947 | 1          | 0.8947 | 0 | 0 | 0 | 1 Ref      |
| DQ398043 | Unassigned | Unassigned | Unassigned | 215_0  | Clustered           | 5 VC_215_0   | 5   | 0.0724 | 0.99999997 | 0.0724 | 0 | 0 | 0 | 1 Ref      |
| DQ398044 | Unassigned | Unassigned | Unassigned | 372_0  | Clustered           | 24 VC_372_0  | 24  | 0.5539 | 1          | 0.5539 | 0 | 0 | 0 | 1 Ref      |
| DQ398045 | Unassigned | Unassigned | Unassigned | 520_60 | Clustered           | 2 VC_520_60  | 2   | 0.0091 | 0.95761233 | 0.0087 | 0 | 0 | 0 | 1 Ref      |
| DQ398046 | Unassigned | Unassigned | Unassigned | 371_16 | Clustered           | 42 VC_371_16 | 42  | 0.1341 | 1          | 0.1341 | 0 | 0 | 0 | 0.7282 Ref |
| DQ398047 | Unassigned | Unassigned | Unassigned | 565_0  | Clustered           | 20 VC_565_0  | 20  | 0.8398 | 1          | 0.8398 | 0 | 0 | 0 | 1 Ref      |
| DQ398048 | Unassigned | Unassigned | Unassigned | 508_0  | Clustered           | 32 VC_508_0  | 32  | 0.906  | 1          | 0.906  | 0 | 0 | 0 | 1 Ref      |
| DQ398049 | Unassigned | Unassigned | Unassigned | 509_0  | Clustered           | 37 VC_509_0  | 37  | 0.9689 | 1          | 0.9689 | 0 | 0 | 0 | 1 Ref      |
| DQ398050 | Unassigned | Unassigned | Unassigned | 520_58 | Clustered           | 3 VC_520_58  | 3   | 0.021  | 0.9985993  | 0.021  | 0 | 0 | 0 | 1 Ref      |
| DQ398051 | Unassigned | Unassigned | Unassigned | 565_0  | Clustered           | 20 VC_565_0  | 20  | 0.8398 | 1          | 0.8398 | 0 | 0 | 0 | 1 Ref      |
| DQ398052 | Unassigned | Unassigned | Unassigned | 764_0  | Clustered           | 4 VC_764_0   | 4   | 0.3556 | 0.99997469 | 0.3556 | 0 | 0 | 0 | 1 Ref      |
| DQ398053 | Unassigned | Unassigned | Unassigned | 558_31 | Clustered/Singleton | 1 VC_558_31  | 1   | 0      | 1          | 0      | 0 | 0 | 0 | 1 Ref      |
| DQ426904 | Unassigned | Unassigned | Unassigned | 4_0    | Clustered           | 7 VC_4_0     | 7   | 0.7912 | 1          | 0.7912 | 0 | 0 | 0 | 1 Ref      |
| DQ426905 | Unassigned | Unassigned | Unassigned | 4_0    | Clustered           | 7 VC_4_0     | 7   | 0.7912 | 1          | 0.7912 | 0 | 0 | 0 | 1 Ref      |
| DQ431235 | Unassigned | Unassigned | Unassigned | 765_0  | Clustered           | 132 VC_765_0 | 132 | 1      | 1          | 1      | 0 | 0 | 0 | 1 Ref      |
| DQ466086 | Unassigned | Unassigned | Unassigned | 139_1  | Clustered           | 4 VC_139_1   | 4   | 0.1775 | 0.99998609 | 0.1775 | 0 | 0 | 0 | 1 Ref      |
| DQ490056 | Unassigned | Unassigned | Unassigned | 689_0  | Clustered           | 2 VC_689_0   | 2   | 0.4402 | 0.95582436 | 0.4208 | 0 | 0 | 0 | 1 Ref      |
| DQ500118 | Unassigned | Unassigned | Unassigned | 770_0  | Clustered           | 5 VC_770_0   | 5   | 0.8394 | 0.99999405 | 0.8394 | 0 | 0 | 0 | 1 Ref      |
| DQ517338 | Unassigned | Unassigned | Unassigned | 9_0    | Clustered           | 38 VC_9_0    | 38  | 0.4895 | 1          | 0.4895 | 0 | 0 | 0 | 1 Ref      |
| DQ529280 | Unassigned | Unassigned | Unassigned | 600_2  | Clustered           | 10 VC_600_2  | 10  | 0.3041 | 1          | 0.3041 | 0 | 0 | 0 | 1 Ref      |
| DQ530359 | Unassigned | Unassigned | Unassigned | 9_0    | Clustered           | 38 VC_9_0    | 38  | 0.4895 | 1          | 0.4895 | 0 | 0 | 0 | 1 Ref      |
| DQ530360 | Unassigned | Unassigned | Unassigned | 9_0    | Clustered           | 38 VC_9_0    | 38  | 0.4895 | 1          | 0.4895 | 0 | 0 | 0 | 1 Ref      |
| DQ530361 | Unassigned | Unassigned | Unassigned | 10_0   | Clustered           | 25 VC_10_0   | 25  | 0.3467 | 1          | 0.3467 | 0 | 0 | 0 | 0.9733 Ref |
| DQ530362 | Unassigned | Unassigned | Unassigned | 12_0   | Clustered           | 21 VC_12_0   | 21  | 0.2274 | 1          | 0.2274 | 0 | 0 | 0 | 0.9571 Ref |
| DQ631426 | Unassigned | Unassigned | Unassigned | 179_0  | Clustered           | 53 VC_179_0  | 53  | 0.9137 | 1          | 0.9137 | 0 | 0 | 0 | 1 Ref      |
| DQ674738 | Unassigned | Unassigned | Unassigned | 5_0    | Clustered           | 30 VC_5_0    | 30  | 0.9647 | 1          | 0.9647 | 0 | 0 | 0 | 1 Ref      |
| DQ777876 | Unassigned | Unassigned | Unassigned | 113_0  | Clustered           | 9 VC_113_0   | 9   | 0.519  | 1          | 0.519  | 0 | 0 | 0 | 1 Ref      |
| DQ785801 | Unassigned | Unassigned | Unassigned | 63_0   | Clustered           | 2 VC_63_0    | 2   | 0.1147 | 0.95689598 | 0.1098 | 0 | 0 | 0 | 1 Ref      |
| DQ832317 | Unassigned | Unassigned | Unassigned | 772_15 | Clustered           | 5 VC_772_15  | 5   | 0.0243 | 0.76144861 | 0.0185 | 0 | 0 | 0 | 0.9 Ref    |
| DQ836063 | Unassigned | Unassigned | Unassigned | 314_0  | Clustered           | 2 VC_314_0   | 2   | 0.1808 | 0.99999983 | 0.1808 | 0 | 0 | 0 | 1 Ref      |
| DQ840344 | Unassigned | Unassigned | Unassigned | 138_0  | Clustered           | 2 VC_138_0   | 2   | 0.2009 | 0.95368907 | 0.1916 | 0 | 0 | 0 | 1 Ref      |
| DQ846424 | Unassigned | Unassigned | Unassigned | 773_0  | Clustered           | 23 VC_773_0  | 23  | 0.5514 | 1          | 0.5514 | 0 | 0 | 0 | 1 Ref      |
| DQ873690 | Unassigned | Unassigned | Unassigned | 179_0  | Clustered           | 53 VC_179_0  | 53  | 0.9137 | 1          | 0.9137 | 0 | 0 | 0 | 1 Ref      |
| DQ875742 | Unassigned | Unassigned | Unassigned | 778_0  | Clustered           | 4 VC_778_0   | 4   | 0.8115 | 0.99985435 | 0.8114 | 0 | 0 | 0 | 1 Ref      |
| DQ904452 | Unassigned | Unassigned | Unassigned | 283_94 | Clustered           | 2 VC_283_94  | 2   | 0.0026 | 0.95293762 | 0.0025 | 0 | 0 | 0 | 1 Ref      |
| DQ908929 | Unassigned | Unassigned | Unassigned | 12_2   | Clustered           | 19 VC_12_2   | 19  | 0.2018 | 1          | 0.2018 | 0 | 0 | 0 | 1 Ref      |
| DQ997624 | Unassigned | Unassigned | Unassigned | 477_0  | Clustered           | 4 VC_477_0   | 4   | 0.9836 | 0.99748973 | 0.9811 | 0 | 0 | 0 | 1 Ref      |
| EF056009 | Unassigned | Unassigned | Unassigned | 779_0  | Clustered           | 37 VC_779_0  | 37  | 0.5682 | 1          | 0.5682 | 0 | 0 | 0 | 1 Ref      |
| EF057797 | Unassigned | Unassigned | Unassigned | 126_0  | Clustered           | 2 VC_126_0   | 2   | 0.1661 | 0.95181568 | 0.1581 | 0 | 0 | 0 | 1 Ref      |
| EF068134 | Unassigned | Unassigned | Unassigned | 188_0  | Clustered           | 13 VC_188_0  | 13  | 0.9973 | 0.99823802 | 0.9956 | 0 | 0 | 0 | 1 Ref      |
| EF108464 | Unassigned | Unassigned | Unassigned | 315_0  | Clustered           | 12 VC_315_0  | 12  | 0.8947 | 1          | 0.8947 | 0 | 0 | 0 | 1 Ref      |
| EF108465 | Unassigned | Unassigned | Unassigned | 315_0  | Clustered           | 12 VC_315_0  | 12  | 0.8947 | 1          | 0.8947 | 0 | 0 | 0 | 1 Ref      |
| EF153632 | Unassigned | Unassigned | Unassigned | 536_0  | Clustered           | 3 VC_536_0   | 3   | 0.0878 | 0.9985359  | 0.0877 | 0 | 0 | 0 | 1 Ref      |
| EF160123 | Unassigned | Unassigned | Unassigned | 453_0  | Clustered           | 6 VC_453_0   | 6   | 0.114  | 1          | 0.114  | 0 | 0 | 0 | 1 Ref      |
| EF177456 | Unassigned | Unassigned | Unassigned | 637_0  | Clustered           | 115 VC_637_0 | 115 | 0.731  | 1          | 0.731  | 0 | 0 | 0 | 0.8764 Ref |
| EF204939 | Unassigned | Unassigned | Unassigned | 315_0  | Clustered           | 12 VC_315_0  | 12  | 0.8947 | 1          | 0.8947 | 0 | 0 | 0 | 1 Ref      |
| EF204940 | Unassigned | Unassigned | Unassigned | 315_0  | Clustered           | 12 VC_315_0  | 12  | 0.8947 | 1          | 0.8947 | 0 | 0 | 0 | 1 Ref      |
| EF372997 | Unassigned | Unassigned | Unassigned | 340_0  | Clustered           | 31 VC_340_0  | 31  | 0.9549 | 1          | 0.9549 | 0 | 0 | 0 | 1 Ref      |
| EF380009 | Unassigned | Unassigned | Unassigned | 303_0  | Clustered           | 155 VC_303_0 | 155 | 0.9979 | 1          | 0.9979 | 0 | 0 | 0 | 1 Ref      |
| EF380010 | Unassigned | Unassigned | Unassigned | 303_0  | Clustered           | 155 VC_303_0 | 155 | 0.9979 | 1          | 0.9979 | 0 | 0 | 0 | 1 Ref      |
| EF380011 | Unassigned | Unassigned | Unassigned | 303_0  | Clustered           | 155 VC_303_0 | 155 | 0.9979 | 1          | 0.9979 | 0 | 0 | 0 | 1 Ref      |
| EF380012 | Unassigned | Unassigned | Unassigned | 303_0  | Clustered           | 155 VC_303_0 | 155 | 0.9979 | 1          | 0.9979 | 0 | 0 | 0 | 1 Ref      |
| EF380013 | Unassigned | Unassigned | Unassigned | 303_0  | Clustered           | 155 VC_303_0 | 155 | 0.9979 | 1          | 0.9979 | 0 | 0 | 0 | 1 Ref      |
| EF380014 | Unassigned | Unassigned | Unassigned | 303_0  | Clustered           | 155 VC_303_0 | 155 | 0.9979 | 1          | 0.9979 | 0 | 0 | 0 | 1 Ref      |
| EF380015 | Unassigned | Unassigned | Unassigned | 303_0  | Clustered           | 155 VC_303_0 | 155 | 0.9979 | 1          | 0.9979 | 0 | 0 | 0 | 1 Ref      |
| EF380016 | Unassigned | Unassigned | Unassigned | 303_0  | Clustered           | 155 VC_303_0 | 155 | 0.9979 | 1          | 0.9979 | 0 | 0 | 0 | 1 Ref      |
| EF380017 | Unassigned | Unassigned | Unassigned | 303_0  | Clustered           | 155 VC_303_0 | 155 | 0.9979 | 1          | 0.9979 | 0 | 0 | 0 | 1 Ref      |
| EF380018 | Unassigned | Unassigned | Unassigned | 303_0  | Clustered           | 155 VC_303_0 | 155 | 0.9979 | 1          | 0.9979 | 0 | 0 | 0 | 1 Ref      |
| EF380019 | Unassigned | Unassigned | Unassigned | 303_0  | Clustered           | 155 VC_303_0 | 155 | 0.9979 | 1          | 0.9979 | 0 | 0 | 0 | 1 Ref      |
| EF380020 | Unassigned | Unassigned | Unassigned | 303_0  | Clustered           | 155 VC_303_0 | 155 | 0.9979 | 1          | 0.9979 | 0 | 0 | 0 | 1 Ref      |
| EF380021 | Unassigned | Unassigned | Unassigned | 303_0  | Clustered           | 155 VC_303_0 | 155 | 0.9979 | 1          | 0.9979 | 0 | 0 | 0 | 1 Ref      |
| EF380022 | Unassigned | Unassigned | Unassigned | 303_0  | Clustered           | 155 VC_303_0 | 155 | 0.9979 | 1          | 0.9979 | 0 | 0 | 0 | 1 Ref      |
| EF380023 | Unassigned | Unassigned | Unassigned | 303_0  | Clustered           | 155 VC_303_0 | 155 | 0.9979 | 1          | 0.9979 | 0 | 0 | 0 | 1 Ref      |
| EF380024 | Unassigned | Unassigned | Unassigned | 303_0  | Clustered           | 155 VC_303_0 | 155 | 0.9979 | 1          | 0.9979 | 0 | 0 | 0 | 1 Ref      |
| EF380025 | Unassigned | Unassigned | Unassigned | 303_0  | Clustered           | 155 VC_303_0 | 155 | 0.9979 | 1          | 0.9979 | 0 | 0 | 0 | 1 Ref      |
| EF380026 | Unassigned | Unassigned | Unassigned | 303_0  | Clustered           | 155 VC_303_0 | 155 | 0.9979 | 1          | 0.9979 | 0 | 0 | 0 | 1 Ref      |
| EF380027 | Unassigned | Unassigned | Unassigned | 303_0  | Clustered           | 155 VC_303_0 | 155 | 0.9979 | 1          | 0.9979 | 0 | 0 | 0 | 1 Ref      |
| EF380028 | Unassigned | Unassigned | Unassigned | 303_0  | Clustered           | 155 VC_303_0 | 155 | 0.9979 | 1          | 0.9979 | 0 | 0 | 0 | 1 Ref      |
| EF380029 | Unassigned | Unassigned | Unassigned | 303_0  | Clustered           | 155 VC_303_0 | 155 | 0.9979 | 1          | 0.9979 | 0 | 0 | 0 | 1 Ref      |
| EF380030 | Unassigned | Unassigned | Unassigned | 303_0  | Clustered           | 155 VC_303_0 | 155 | 0.9979 | 1          | 0.9979 | 0 | 0 | 0 | 1 Ref      |
| EF380031 | Unassigned | Unassigned | Unassigned | 303_0  | Clustered           | 155 VC_303_0 | 155 | 0.9979 | 1          | 0.9979 | 0 | 0 | 0 | 1 Ref      |
| EF380032 | Unassigned | Unassigned | Unassigned | 303_0  | Clustered           | 155 VC_303_0 | 155 | 0.9979 | 1          | 0.9979 | 0 | 0 | 0 | 1 Ref      |
| EF432053 | Unassigned | Unassigned | Unassigned | 791_0  | Clustered           | 3 VC_791_0   | 3   | 1      | 1          | 1      | 0 | 0 | 0 | 1 Ref      |
| EF437941 | Unassigned | Unassigned | Unassigned | 590_0  | Clustered           | 27 VC_590_0  | 27  | 0.9947 | 1          | 0.9947 | 0 | 0 | 0 | 1 Ref      |
| EF460875 | Unassigned | Unassigned | Unassigned | 792_0  | Clustered           | 35 VC_792_0  | 35  | 0.9828 | 1          | 0.9828 | 0 | 0 | 0 | 1 Ref      |
| EF462197 | Unassigned | Unassigned | Unassigned | 7_0    | Clustered           | 28 VC_7_0    | 28  | 0.3916 | 1          | 0.3916 | 0 | 0 | 0 | 0.9947 Ref |
| EF462198 | Unassigned | Unassigned | Unassigned | 8_0    | Clustered           | 58 VC_8_0    | 58  | 0.8306 | 1          | 0.8306 | 0 | 0 | 0 | 0.9946 Ref |



|          |            |            |            |        |                     |              |     |        |            |        |   |   |   |        |     |
|----------|------------|------------|------------|--------|---------------------|--------------|-----|--------|------------|--------|---|---|---|--------|-----|
| EF462199 | Unassigned | Unassigned | Unassigned | 7_0    | Clustered           | 28 VC_7_0    | 28  | 0.3916 | 1          | 0.3916 | 0 | 0 | 0 | 0.9947 | Ref |
| EF469154 | Unassigned | Unassigned | Unassigned | 290_6  | Clustered           | 12 VC_290_6  | 12  | 0.1149 | 1          | 0.1149 | 0 | 0 | 0 | 0.8182 | Ref |
| EF506570 | Unassigned | Unassigned | Unassigned | 794_0  | Clustered           | 3 VC_794_0   | 3   | 1      | 1          | 1      | 0 | 0 | 0 | 1      | Ref |
| EF529515 | Unassigned | Unassigned | Unassigned | 254_0  | Clustered           | 46 VC_254_0  | 46  | 0.5159 | 1          | 0.5159 | 0 | 0 | 0 | 1      | Ref |
| EF536069 | Unassigned | Unassigned | Unassigned | 520_24 | Clustered/Singleton | 1 VC_520_24  | 1   | 0      | 1          | 0      | 0 | 0 | 0 | 1      | Ref |
| EF537008 | Unassigned | Unassigned | Unassigned | 777_0  | Clustered           | 3 VC_777_0   | 3   | 0.4763 | 0.9961812  | 0.4745 | 0 | 0 | 0 | 1      | Ref |
| EF583821 | Unassigned | Unassigned | Unassigned | 90_2   | Clustered/Singleton | 1 VC_90_2    | 1   | 0      | 1          | 0      | 0 | 0 | 0 | 1      | Ref |
| EU030938 | Unassigned | Unassigned | Unassigned | 599_0  | Clustered           | 50 VC_599_0  | 50  | 0.9989 | 1          | 0.9989 | 0 | 0 | 0 | 1      | Ref |
| EU030939 | Unassigned | Unassigned | Unassigned | 599_0  | Clustered           | 50 VC_599_0  | 50  | 0.9989 | 1          | 0.9989 | 0 | 0 | 0 | 1      | Ref |
| EU056923 | Unassigned | Unassigned | Unassigned | 423_0  | Clustered           | 45 VC_423_0  | 45  | 0.9484 | 1          | 0.9484 | 0 | 0 | 0 | 1      | Ref |
| EU078592 | Unassigned | Unassigned | Unassigned | 43_0   | Clustered           | 38 VC_43_0   | 38  | 0.5885 | 1          | 0.5885 | 0 | 0 | 0 | 0.9659 | Ref |
| EU081845 | Unassigned | Unassigned | Unassigned | 800_0  | Clustered           | 3 VC_800_0   | 3   | 0.4591 | 0.9984737  | 0.4584 | 0 | 0 | 0 | 1      | Ref |
| EU100883 | Unassigned | Unassigned | Unassigned | 805_0  | Clustered           | 4 VC_805_0   | 4   | 0.9081 | 0.99622688 | 0.9046 | 0 | 0 | 0 | 1      | Ref |
| EU100884 | Unassigned | Unassigned | Unassigned | 805_0  | Clustered           | 4 VC_805_0   | 4   | 0.9081 | 0.99622688 | 0.9046 | 0 | 0 | 0 | 1      | Ref |
| EU124666 | Unassigned | Unassigned | Unassigned | 807_0  | Clustered           | 17 VC_807_0  | 17  | 0.907  | 1          | 0.907  | 0 | 0 | 0 | 1      | Ref |
| EU136189 | Unassigned | Unassigned | Unassigned | 96_0   | Clustered           | 30 VC_96_0   | 30  | 0.718  | 1          | 0.718  | 0 | 0 | 0 | 1      | Ref |
| EU197055 | Unassigned | Unassigned | Unassigned | 344_4  | Clustered/Singleton | 1 VC_344_4   | 1   | 0      | 1          | 0      | 0 | 0 | 0 | 1      | Ref |
| EU203571 | Unassigned | Unassigned | Unassigned | 810_0  | Clustered           | 18 VC_810_0  | 18  | 0.9121 | 1          | 0.9121 | 0 | 0 | 0 | 1      | Ref |
| EU221285 | Unassigned | Unassigned | Unassigned | 202_0  | Clustered           | 102 VC_202_0 | 102 | 0.4049 | 1          | 0.4049 | 0 | 0 | 0 | 0.7876 | Ref |
| EU236438 | Unassigned | Unassigned | Unassigned | 423_0  | Clustered           | 45 VC_423_0  | 45  | 0.9484 | 1          | 0.9484 | 0 | 0 | 0 | 1      | Ref |
| EU246945 | Unassigned | Unassigned | Unassigned | 272_0  | Clustered           | 11 VC_272_0  | 11  | 0.4915 | 1          | 0.4915 | 0 | 0 | 0 | 0.8727 | Ref |
| EU272036 | Unassigned | Unassigned | Unassigned | 179_0  | Clustered           | 53 VC_179_0  | 53  | 0.9137 | 1          | 0.9137 | 0 | 0 | 0 | 1      | Ref |
| EU272037 | Unassigned | Unassigned | Unassigned | 179_0  | Clustered           | 53 VC_179_0  | 53  | 0.9137 | 1          | 0.9137 | 0 | 0 | 0 | 1      | Ref |
| EU311208 | Unassigned | Unassigned | Unassigned | 39_0   | Clustered           | 35 VC_39_0   | 35  | 0.4337 | 1          | 0.4337 | 0 | 0 | 0 | 1      | Ref |
| EU330206 | Unassigned | Unassigned | Unassigned | 813_1  | Clustered           | 24 VC_813_1  | 24  | 0.535  | 1          | 0.535  | 0 | 0 | 0 | 1      | Ref |
| EU340421 | Unassigned | Unassigned | Unassigned | 640_0  | Clustered           | 7 VC_640_0   | 7   | 0.9025 | 1          | 0.9025 | 0 | 0 | 0 | 1      | Ref |
| EU350361 | Unassigned | Unassigned | Unassigned | 814_0  | Clustered           | 3 VC_814_0   | 3   | 1      | 1          | 1      | 0 | 0 | 0 | 1      | Ref |
| EU399241 | Unassigned | Unassigned | Unassigned | 126_0  | Clustered           | 2 VC_126_0   | 2   | 0.1661 | 0.95181568 | 0.1581 | 0 | 0 | 0 | 1      | Ref |
| EU408779 | Unassigned | Unassigned | Unassigned | 424_0  | Clustered           | 7 VC_424_0   | 7   | 0.9044 | 0.9998143  | 0.9043 | 0 | 0 | 0 | 1      | Ref |
| EU418428 | Unassigned | Unassigned | Unassigned | 149_8  | Clustered           | 66 VC_149_8  | 66  | 0.4565 | 1          | 0.4565 | 0 | 0 | 0 | 0.8182 | Ref |
| EU545650 | Unassigned | Unassigned | Unassigned | 349_0  | Clustered           | 7 VC_349_0   | 7   | 0.9363 | 0.99999996 | 0.9363 | 0 | 0 | 0 | 1      | Ref |
| EU547803 | Unassigned | Unassigned | Unassigned | 385_0  | Clustered           | 51 VC_385_0  | 51  | 0.8754 | 1          | 0.8754 | 0 | 0 | 0 | 1      | Ref |
| EU568876 | Unassigned | Unassigned | Unassigned | 761_0  | Clustered           | 67 VC_761_0  | 67  | 0.8947 | 1          | 0.8947 | 0 | 0 | 0 | 1      | Ref |
| EU570103 | Unassigned | Unassigned | Unassigned | 28_1   | Clustered           | 53 VC_28_1   | 53  | 0.7164 | 1          | 0.7164 | 0 | 0 | 0 | 0.9325 | Ref |
| EU588980 | Unassigned | Unassigned | Unassigned | 815_0  | Clustered           | 8 VC_815_0   | 8   | 0.9801 | 1          | 0.9801 | 0 | 0 | 0 | 1      | Ref |
| EU622808 | Unassigned | Unassigned | Unassigned | 817_0  | Clustered           | 14 VC_817_0  | 14  | 0.6342 | 1          | 0.6342 | 0 | 0 | 0 | 1      | Ref |
| EU652770 | Unassigned | Unassigned | Unassigned | 390_0  | Clustered           | 4 VC_390_0   | 4   | 0.0468 | 0.9999982  | 0.0468 | 0 | 0 | 0 | 1      | Ref |
| EU676000 | Unassigned | Unassigned | Unassigned | 565_0  | Clustered           | 20 VC_565_0  | 20  | 0.8398 | 1          | 0.8398 | 0 | 0 | 0 | 1      | Ref |
| EU710883 | Unassigned | Unassigned | Unassigned | 328_0  | Clustered           | 11 VC_328_0  | 11  | 0.4707 | 1          | 0.4707 | 0 | 0 | 0 | 1      | Ref |
| EU716414 | Unassigned | Unassigned | Unassigned | 80_0   | Clustered           | 41 VC_80_0   | 41  | 0.5837 | 1          | 0.5837 | 0 | 0 | 0 | 0.9805 | Ref |
| EU717894 | Unassigned | Unassigned | Unassigned | 113_0  | Clustered           | 9 VC_113_0   | 9   | 0.519  | 1          | 0.519  | 0 | 0 | 0 | 1      | Ref |
| EU734170 | Unassigned | Unassigned | Unassigned | 386_0  | Clustered           | 49 VC_386_0  | 49  | 0.7941 | 1          | 0.7941 | 0 | 0 | 0 | 1      | Ref |
| EU734171 | Unassigned | Unassigned | Unassigned | 386_0  | Clustered           | 49 VC_386_0  | 49  | 0.7941 | 1          | 0.7941 | 0 | 0 | 0 | 1      | Ref |
| EU734172 | Unassigned | Unassigned | Unassigned | 451_0  | Clustered           | 80 VC_451_0  | 80  | 0.9991 | 1          | 0.9991 | 0 | 0 | 0 | 1      | Ref |
| EU734173 | Unassigned | Unassigned | Unassigned | 823_0  | Clustered           | 124 VC_823_0 | 124 | 0.9492 | 1          | 0.9492 | 0 | 0 | 0 | 1      | Ref |
| EU734174 | Unassigned | Unassigned | Unassigned | 392_0  | Clustered           | 126 VC_392_0 | 126 | 0.9621 | 1          | 0.9621 | 0 | 0 | 0 | 1      | Ref |
| EU744248 | Unassigned | Unassigned | Unassigned | 325_21 | Clustered           | 5 VC_325_21  | 5   | 0.0209 | 0.99999976 | 0.0209 | 0 | 0 | 0 | 0.8    | Ref |
| EU744249 | Unassigned | Unassigned | Unassigned | 325_13 | Clustered           | 2 VC_325_13  | 2   | 0.0082 | 0.957512   | 0.0079 | 0 | 0 | 0 | 1      | Ref |
| EU744250 | Unassigned | Unassigned | Unassigned | 217_0  | Clustered           | 5 VC_217_0   | 5   | 0.069  | 0.99999998 | 0.069  | 0 | 0 | 0 | 1      | Ref |
| EU744251 | Unassigned | Unassigned | Unassigned | 325_44 | Clustered           | 3 VC_325_44  | 3   | 0.0157 | 0.99859171 | 0.0157 | 0 | 0 | 0 | 1      | Ref |
| EU744252 | Unassigned | Unassigned | Unassigned | 325_13 | Clustered           | 2 VC_325_13  | 2   | 0.0082 | 0.957512   | 0.0079 | 0 | 0 | 0 | 1      | Ref |
| EU770221 | Unassigned | Unassigned | Unassigned | 372_0  | Clustered           | 24 VC_372_0  | 24  | 0.5539 | 1          | 0.5539 | 0 | 0 | 0 | 1      | Ref |
| EU770222 | Unassigned | Unassigned | Unassigned | 567_0  | Clustered           | 8 VC_567_0   | 8   | 0.4935 | 1          | 0.4935 | 0 | 0 | 0 | 1      | Ref |
| EU771092 | Unassigned | Unassigned | Unassigned | 817_0  | Clustered           | 14 VC_817_0  | 14  | 0.6342 | 1          | 0.6342 | 0 | 0 | 0 | 1      | Ref |
| EU794049 | Unassigned | Unassigned | Unassigned | 29_0   | Clustered           | 10 VC_29_0   | 10  | 0.5208 | 1          | 0.5208 | 0 | 0 | 0 | 1      | Ref |
| EU816588 | Unassigned | Unassigned | Unassigned | 551_6  | Clustered           | 22 VC_551_6  | 22  | 0.1214 | 1          | 0.1214 | 0 | 0 | 0 | 0.8095 | Ref |
| EU816589 | Unassigned | Unassigned | Unassigned | 509_0  | Clustered           | 37 VC_509_0  | 37  | 0.9689 | 1          | 0.9689 | 0 | 0 | 0 | 1      | Ref |
| EU816590 | Unassigned | Unassigned | Unassigned | 520_58 | Clustered           | 3 VC_520_58  | 3   | 0.021  | 0.9985993  | 0.021  | 0 | 0 | 0 | 1      | Ref |
| EU816591 | Unassigned | Unassigned | Unassigned | 551_2  | Clustered           | 17 VC_551_2  | 17  | 0.0973 | 1          | 0.0973 | 0 | 0 | 0 | 0.9779 | Ref |
| EU826466 | Unassigned | Unassigned | Unassigned | 559_0  | Clustered           | 2 VC_559_0   | 2   | 0.0112 | 0.95651281 | 0.0107 | 0 | 0 | 0 | 1      | Ref |
| EU826467 | Unassigned | Unassigned | Unassigned | 558_30 | Clustered           | 3 VC_558_30  | 3   | 0.0064 | 0.76574053 | 0.0049 | 0 | 0 | 0 | 1      | Ref |
| EU826468 | Unassigned | Unassigned | Unassigned | 558_25 | Clustered/Singleton | 1 VC_558_25  | 1   | 0      | 1          | 0      | 0 | 0 | 0 | 1      | Ref |
| EU826469 | Unassigned | Unassigned | Unassigned | 558_26 | Clustered/Singleton | 1 VC_558_26  | 1   | 0      | 1          | 0      | 0 | 0 | 0 | 1      | Ref |
| EU826470 | Unassigned | Unassigned | Unassigned | 325_35 | Clustered           | 17 VC_325_35 | 17  | 0.0732 | 1          | 0.0732 | 0 | 0 | 0 | 0.7721 | Ref |
| EU826471 | Unassigned | Unassigned | Unassigned | 558_2  | Clustered           | 2 VC_558_2   | 2   | 0.0032 | 0.66859979 | 0.0021 | 0 | 0 | 0 | 1      | Ref |
| EU855793 | Unassigned | Unassigned | Unassigned | 740_0  | Clustered           | 3 VC_740_0   | 3   | 0.202  | 0.99811828 | 0.2016 | 0 | 0 | 0 | 1      | Ref |
| EU861004 | Unassigned | Unassigned | Unassigned | 9_0    | Clustered           | 38 VC_9_0    | 38  | 0.4895 | 1          | 0.4895 | 0 | 0 | 0 | 1      | Ref |
| EU861005 | Unassigned | Unassigned | Unassigned | 8_0    | Clustered           | 58 VC_8_0    | 58  | 0.8306 | 1          | 0.8306 | 0 | 0 | 0 | 0.9946 | Ref |
| EU863408 | Unassigned | Unassigned | Unassigned | 590_0  | Clustered           | 27 VC_590_0  | 27  | 0.9947 | 1          | 0.9947 | 0 | 0 | 0 | 1      | Ref |
| EU863409 | Unassigned | Unassigned | Unassigned | 290_6  | Clustered           | 12 VC_290_6  | 12  | 0.1149 | 1          | 0.1149 | 0 | 0 | 0 | 0.8182 | Ref |
| EU874396 | Unassigned | Unassigned | Unassigned | 652_0  | Clustered           | 4 VC_652_0   | 4   | 0.4743 | 0.99998076 | 0.4743 | 0 | 0 | 0 | 1      | Ref |
| EU877232 | Unassigned | Unassigned | Unassigned | 329_7  | Clustered           | 18 VC_329_7  | 18  | 0.0938 | 1          | 0.0938 | 0 | 0 | 0 | 0.7778 | Ref |
| EU887664 | Unassigned | Unassigned | Unassigned | 829_0  | Clustered           | 5 VC_829_0   | 5   | 0.8821 | 0.99999832 | 0.8821 | 0 | 0 | 0 | 1      | Ref |
| FI CCG   | Unassigned | Unassigned | Unassigned | 61_0   | Clustered           | 12 VC_61_0   | 12  | 0.7633 | 1          | 0.7633 | 0 | 0 | 0 | 1      | Ref |
| FI000341 | Unassigned | Unassigned | Unassigned | 28_1   | Clustered           | 53 VC_28_1   | 53  | 0.7164 | 1          | 0.7164 | 0 | 0 | 0 | 0.9325 | Ref |
| FI008913 | Unassigned | Unassigned | Unassigned | 830_0  | Clustered           | 6 VC_830_0   | 6   | 0.6536 | 1          | 0.6536 | 0 | 0 | 0 | 1      | Ref |
| FI168659 | Unassigned | Unassigned | Unassigned | 518_0  | Clustered           | 6 VC_518_0   | 6   | 0.1295 | 1          | 0.1295 | 0 | 0 | 0 | 1      | Ref |
| FI168660 | Unassigned | Unassigned | Unassigned | 565_0  | Clustered           | 20 VC_565_0  | 20  | 0.8398 | 1          | 0.8398 | 0 | 0 | 0 | 1      | Ref |
| FI168661 | Unassigned | Unassigned | Unassigned | 565_0  | Clustered           | 20 VC_565_0  | 20  | 0.8398 | 1          | 0.8398 | 0 | 0 | 0 | 1      | Ref |
| FI168662 | Unassigned | Unassigned | Unassigned | 565_0  | Clustered           | 20 VC_565_0  | 20  | 0.8398 | 1          | 0.8398 | 0 | 0 | 0 | 1      | Ref |
| FI174690 | Unassigned | Unassigned | Unassigned | 520_31 | Clustered           | 11 VC_520_31 | 11  | 0.0897 | 1          | 0.0897 | 0 | 0 | 0 | 0.6    | Ref |



|          |            |            |            |        |                     |              |     |        |            |        |   |   |   |            |
|----------|------------|------------|------------|--------|---------------------|--------------|-----|--------|------------|--------|---|---|---|------------|
| FI174691 | Unassigned | Unassigned | Unassigned | 567_0  | Clustered           | 8 VC_567_0   | 8   | 0.4935 | 1          | 0.4935 | 0 | 0 | 0 | 1 Ref      |
| FI174693 | Unassigned | Unassigned | Unassigned | 520_71 | Clustered/Singleton | 1 VC_520_71  | 1   | 0      | 1          | 0      | 0 | 0 | 0 | 1 Ref      |
| FI174694 | Unassigned | Unassigned | Unassigned | 371_16 | Clustered           | 42 VC_371_16 | 42  | 0.1341 | 1          | 0.1341 | 0 | 0 | 0 | 0.7282 Ref |
| FI184280 | Unassigned | Unassigned | Unassigned | 41_1   | Clustered           | 10 VC_41_1   | 10  | 0.1178 | 1          | 0.1178 | 0 | 0 | 0 | 0.8222 Ref |
| FI188381 | Unassigned | Unassigned | Unassigned | 41_1   | Clustered           | 10 VC_41_1   | 10  | 0.1178 | 1          | 0.1178 | 0 | 0 | 0 | 0.8222 Ref |
| FI194439 | Unassigned | Unassigned | Unassigned | 386_0  | Clustered           | 49 VC_386_0  | 49  | 0.7941 | 1          | 0.7941 | 0 | 0 | 0 | 1 Ref      |
| FI226752 | Unassigned | Unassigned | Unassigned | 254_0  | Clustered           | 46 VC_254_0  | 46  | 0.5159 | 1          | 0.5159 | 0 | 0 | 0 | 1 Ref      |
| FI230960 | Unassigned | Unassigned | Unassigned | 87_0   | Clustered           | 8 VC_87_0    | 8   | 0.5545 | 1          | 0.5545 | 0 | 0 | 0 | 1 Ref      |
| FI236310 | Unassigned | Unassigned | Unassigned | 252_0  | Clustered           | 121 VC_252_0 | 121 | 0.7376 | 1          | 0.7376 | 0 | 0 | 0 | 0.9999 Ref |
| FI373894 | Unassigned | Unassigned | Unassigned | 131_2  | Clustered           | 7 VC_131_2   | 7   | 0.0685 | 1          | 0.0685 | 0 | 0 | 0 | 0.9048 Ref |
| FI409640 | Unassigned | Unassigned | Unassigned | 82_0   | Clustered           | 24 VC_82_0   | 24  | 0.7351 | 1          | 0.7351 | 0 | 0 | 0 | 1 Ref      |
| FI429185 | Unassigned | Unassigned | Unassigned | 534_0  | Clustered           | 9 VC_534_0   | 9   | 0.99   | 1          | 0.99   | 0 | 0 | 0 | 1 Ref      |
| FI483837 | Unassigned | Unassigned | Unassigned | 315_0  | Clustered           | 12 VC_315_0  | 12  | 0.8947 | 1          | 0.8947 | 0 | 0 | 0 | 1 Ref      |
| FI483838 | Unassigned | Unassigned | Unassigned | 315_0  | Clustered           | 12 VC_315_0  | 12  | 0.8947 | 1          | 0.8947 | 0 | 0 | 0 | 1 Ref      |
| FI483839 | Unassigned | Unassigned | Unassigned | 315_0  | Clustered           | 12 VC_315_0  | 12  | 0.8947 | 1          | 0.8947 | 0 | 0 | 0 | 1 Ref      |
| FI483840 | Unassigned | Unassigned | Unassigned | 188_0  | Clustered           | 13 VC_188_0  | 13  | 0.9973 | 0.99823802 | 0.9956 | 0 | 0 | 0 | 1 Ref      |
| FI483841 | Unassigned | Unassigned | Unassigned | 188_0  | Clustered           | 13 VC_188_0  | 13  | 0.9973 | 0.99823802 | 0.9956 | 0 | 0 | 0 | 1 Ref      |
| FI483842 | Unassigned | Unassigned | Unassigned | 188_0  | Clustered           | 13 VC_188_0  | 13  | 0.9973 | 0.99823802 | 0.9956 | 0 | 0 | 0 | 1 Ref      |
| FI483843 | Unassigned | Unassigned | Unassigned | 188_0  | Clustered           | 13 VC_188_0  | 13  | 0.9973 | 0.99823802 | 0.9956 | 0 | 0 | 0 | 1 Ref      |
| FI483844 | Unassigned | Unassigned | Unassigned | 188_0  | Clustered           | 13 VC_188_0  | 13  | 0.9973 | 0.99823802 | 0.9956 | 0 | 0 | 0 | 1 Ref      |
| FI539132 | Unassigned | Unassigned | Unassigned | 188_0  | Clustered           | 13 VC_188_0  | 13  | 0.9973 | 0.99823802 | 0.9956 | 0 | 0 | 0 | 1 Ref      |
| FI539133 | Unassigned | Unassigned | Unassigned | 188_0  | Clustered           | 13 VC_188_0  | 13  | 0.9973 | 0.99823802 | 0.9956 | 0 | 0 | 0 | 1 Ref      |
| FI539134 | Unassigned | Unassigned | Unassigned | 188_0  | Clustered           | 13 VC_188_0  | 13  | 0.9973 | 0.99823802 | 0.9956 | 0 | 0 | 0 | 1 Ref      |
| FI539135 | Unassigned | Unassigned | Unassigned | 188_0  | Clustered           | 13 VC_188_0  | 13  | 0.9973 | 0.99823802 | 0.9956 | 0 | 0 | 0 | 1 Ref      |
| FI591093 | Unassigned | Unassigned | Unassigned | 833_0  | Clustered           | 16 VC_833_0  | 16  | 0.9351 | 1          | 0.9351 | 0 | 0 | 0 | 1 Ref      |
| FI591094 | Unassigned | Unassigned | Unassigned | 833_0  | Clustered           | 16 VC_833_0  | 16  | 0.9351 | 1          | 0.9351 | 0 | 0 | 0 | 1 Ref      |
| FI641182 | Unassigned | Unassigned | Unassigned | 509_0  | Clustered           | 37 VC_509_0  | 37  | 0.9689 | 1          | 0.9689 | 0 | 0 | 0 | 1 Ref      |
| FI685651 | Unassigned | Unassigned | Unassigned | 834_0  | Clustered           | 7 VC_834_0   | 7   | 0.9845 | 0.94276893 | 0.9282 | 0 | 0 | 0 | 1 Ref      |
| FI706171 | Unassigned | Unassigned | Unassigned | 765_0  | Clustered           | 132 VC_765_0 | 132 | 1      | 1          | 1      | 0 | 0 | 0 | 1 Ref      |
| FI706172 | Unassigned | Unassigned | Unassigned | 765_0  | Clustered           | 132 VC_765_0 | 132 | 1      | 1          | 1      | 0 | 0 | 0 | 1 Ref      |
| FI713816 | Unassigned | Unassigned | Unassigned | 7_0    | Clustered           | 28 VC_7_0    | 28  | 0.3916 | 1          | 0.3916 | 0 | 0 | 0 | 0.9947 Ref |
| FI750948 | Unassigned | Unassigned | Unassigned | 835_0  | Clustered           | 67 VC_835_0  | 67  | 0.9624 | 1          | 0.9624 | 0 | 0 | 0 | 1 Ref      |
| FI822135 | Unassigned | Unassigned | Unassigned | 93_0   | Clustered           | 2 VC_93_0    | 2   | 0.1063 | 0.95665672 | 0.1017 | 0 | 0 | 0 | 1 Ref      |
| FI839692 | Unassigned | Unassigned | Unassigned | 283_84 | Clustered/Singleton | 1 VC_283_84  | 1   | 0      | 1          | 0      | 0 | 0 | 0 | 1 Ref      |
| FI839693 | Unassigned | Unassigned | Unassigned | 283_3  | Clustered           | 3 VC_283_3   | 3   | 0.0055 | 0.9968017  | 0.0055 | 0 | 0 | 0 | 1 Ref      |
| FI848881 | Unassigned | Unassigned | Unassigned | 202_0  | Clustered           | 102 VC_202_0 | 102 | 0.4049 | 1          | 0.4049 | 0 | 0 | 0 | 0.7876 Ref |
| FI848882 | Unassigned | Unassigned | Unassigned | 202_0  | Clustered           | 102 VC_202_0 | 102 | 0.4049 | 1          | 0.4049 | 0 | 0 | 0 | 0.7876 Ref |
| FI848883 | Unassigned | Unassigned | Unassigned | 202_0  | Clustered           | 102 VC_202_0 | 102 | 0.4049 | 1          | 0.4049 | 0 | 0 | 0 | 0.7876 Ref |
| FI848884 | Unassigned | Unassigned | Unassigned | 202_0  | Clustered           | 102 VC_202_0 | 102 | 0.4049 | 1          | 0.4049 | 0 | 0 | 0 | 0.7876 Ref |
| FI848885 | Unassigned | Unassigned | Unassigned | 202_0  | Clustered           | 102 VC_202_0 | 102 | 0.4049 | 1          | 0.4049 | 0 | 0 | 0 | 0.7876 Ref |
| FI849058 | Unassigned | Unassigned | Unassigned | 303_0  | Clustered           | 155 VC_303_0 | 155 | 0.9979 | 1          | 0.9979 | 0 | 0 | 0 | 1 Ref      |
| FI867910 | Unassigned | Unassigned | Unassigned | 304_0  | Clustered           | 11 VC_304_0  | 11  | 0.7869 | 1          | 0.7869 | 0 | 0 | 0 | 1 Ref      |
| FI867911 | Unassigned | Unassigned | Unassigned | 304_0  | Clustered           | 11 VC_304_0  | 11  | 0.7869 | 1          | 0.7869 | 0 | 0 | 0 | 1 Ref      |
| FI867912 | Unassigned | Unassigned | Unassigned | 304_0  | Clustered           | 11 VC_304_0  | 11  | 0.7869 | 1          | 0.7869 | 0 | 0 | 0 | 1 Ref      |
| FI867913 | Unassigned | Unassigned | Unassigned | 304_0  | Clustered           | 11 VC_304_0  | 11  | 0.7869 | 1          | 0.7869 | 0 | 0 | 0 | 1 Ref      |
| FI867914 | Unassigned | Unassigned | Unassigned | 304_0  | Clustered           | 11 VC_304_0  | 11  | 0.7869 | 1          | 0.7869 | 0 | 0 | 0 | 1 Ref      |
| FI870915 | Unassigned | Unassigned | Unassigned | 599_0  | Clustered           | 50 VC_599_0  | 50  | 0.9989 | 1          | 0.9989 | 0 | 0 | 0 | 1 Ref      |
| FI870916 | Unassigned | Unassigned | Unassigned | 599_0  | Clustered           | 50 VC_599_0  | 50  | 0.9989 | 1          | 0.9989 | 0 | 0 | 0 | 1 Ref      |
| FI870917 | Unassigned | Unassigned | Unassigned | 599_0  | Clustered           | 50 VC_599_0  | 50  | 0.9989 | 1          | 0.9989 | 0 | 0 | 0 | 1 Ref      |
| FI896200 | Unassigned | Unassigned | Unassigned | 837_0  | Clustered           | 29 VC_837_0  | 29  | 0.9955 | 1          | 0.9955 | 0 | 0 | 0 | 1 Ref      |
| FI904927 | Unassigned | Unassigned | Unassigned | 16_0   | Clustered           | 12 VC_16_0   | 12  | 0.6615 | 1          | 0.6615 | 0 | 0 | 0 | 1 Ref      |
| FI937737 | Unassigned | Unassigned | Unassigned | 162_0  | Clustered           | 18 VC_162_0  | 18  | 0.7403 | 1          | 0.7403 | 0 | 0 | 0 | 0.8627 Ref |
| FI965538 | Unassigned | Unassigned | Unassigned | 255_0  | Clustered           | 13 VC_255_0  | 13  | 0.2048 | 1          | 0.2048 | 0 | 0 | 0 | 1 Ref      |
| FI973624 | Unassigned | Unassigned | Unassigned | 761_0  | Clustered           | 67 VC_761_0  | 67  | 0.8947 | 1          | 0.8947 | 0 | 0 | 0 | 1 Ref      |
| FM164764 | Unassigned | Unassigned | Unassigned | 348_0  | Clustered           | 22 VC_348_0  | 22  | 0.9602 | 1          | 0.9602 | 0 | 0 | 0 | 1 Ref      |
| FM180578 | Unassigned | Unassigned | Unassigned | 41_1   | Clustered           | 10 VC_41_1   | 10  | 0.1178 | 1          | 0.1178 | 0 | 0 | 0 | 0.8222 Ref |
| FM201281 | Unassigned | Unassigned | Unassigned | 79_2   | Clustered/Singleton | 1 VC_79_2    | 1   | 0      | 1          | 0      | 0 | 0 | 0 | 1 Ref      |
| FM201282 | Unassigned | Unassigned | Unassigned | 79_0   | Clustered           | 64 VC_79_0   | 64  | 0.4185 | 1          | 0.4185 | 0 | 0 | 0 | 0.7649 Ref |
| FM207411 | Unassigned | Unassigned | Unassigned | 433_8  | Clustered/Singleton | 1 VC_433_8   | 1   | 0      | 1          | 0      | 0 | 0 | 0 | 1 Ref      |
| FM864213 | Unassigned | Unassigned | Unassigned | 632_0  | Clustered           | 37 VC_632_0  | 37  | 0.581  | 1          | 0.581  | 0 | 0 | 0 | 0.9234 Ref |
| FM887021 | Unassigned | Unassigned | Unassigned | 79_7   | Clustered           | 33 VC_79_7   | 33  | 0.216  | 1          | 0.216  | 0 | 0 | 0 | 0.8409 Ref |
| FM897211 | Unassigned | Unassigned | Unassigned | 79_7   | Clustered           | 33 VC_79_7   | 33  | 0.216  | 1          | 0.216  | 0 | 0 | 0 | 0.8409 Ref |
| FN263372 | Unassigned | Unassigned | Unassigned | 423_0  | Clustered           | 45 VC_423_0  | 45  | 0.9484 | 1          | 0.9484 | 0 | 0 | 0 | 1 Ref      |
| FN297812 | Unassigned | Unassigned | Unassigned | 23_0   | Clustered           | 3 VC_23_0    | 3   | 0.4305 | 0.99837378 | 0.4298 | 0 | 0 | 0 | 1 Ref      |
| FN391954 | Unassigned | Unassigned | Unassigned | 333_0  | Clustered           | 25 VC_333_0  | 25  | 0.4681 | 1          | 0.4681 | 0 | 0 | 0 | 1 Ref      |
| FN422398 | Unassigned | Unassigned | Unassigned | 839_0  | Clustered           | 5 VC_839_0   | 5   | 0.165  | 0.99999995 | 0.165  | 0 | 0 | 0 | 1 Ref      |
| FN422399 | Unassigned | Unassigned | Unassigned | 838_0  | Clustered           | 29 VC_838_0  | 29  | 0.8611 | 1          | 0.8611 | 0 | 0 | 0 | 1 Ref      |
| FN594518 | Unassigned | Unassigned | Unassigned | 155_0  | Clustered           | 14 VC_155_0  | 14  | 0.6095 | 1          | 0.6095 | 0 | 0 | 0 | 1 Ref      |
| FN667788 | Unassigned | Unassigned | Unassigned | 843_0  | Clustered           | 5 VC_843_0   | 5   | 0.2843 | 0.99999994 | 0.2843 | 0 | 0 | 0 | 1 Ref      |
| FN667789 | Unassigned | Unassigned | Unassigned | 843_0  | Clustered           | 5 VC_843_0   | 5   | 0.2843 | 0.99999994 | 0.2843 | 0 | 0 | 0 | 1 Ref      |
| FN997652 | Unassigned | Unassigned | Unassigned | 632_0  | Clustered           | 37 VC_632_0  | 37  | 0.581  | 1          | 0.581  | 0 | 0 | 0 | 0.9234 Ref |
| FO818745 | Unassigned | Unassigned | Unassigned | 247_0  | Clustered           | 14 VC_247_0  | 14  | 0.9119 | 1          | 0.9119 | 0 | 0 | 0 | 0.967 Ref  |
| QF312032 | Unassigned | Unassigned | Unassigned | 133_22 | Clustered           | 13 VC_133_22 | 13  | 0.0804 | 1          | 0.0804 | 0 | 0 | 0 | 0.8205 Ref |
| QF482083 | Unassigned | Unassigned | Unassigned | 328_0  | Clustered           | 11 VC_328_0  | 11  | 0.4707 | 1          | 0.4707 | 0 | 0 | 0 | 1 Ref      |
| QF482084 | Unassigned | Unassigned | Unassigned | 453_0  | Clustered           | 6 VC_453_0   | 6   | 0.114  | 1          | 0.114  | 0 | 0 | 0 | 1 Ref      |
| QF482086 | Unassigned | Unassigned | Unassigned | 453_0  | Clustered           | 6 VC_453_0   | 6   | 0.114  | 1          | 0.114  | 0 | 0 | 0 | 1 Ref      |
| FR667955 | Unassigned | Unassigned | Unassigned | 392_0  | Clustered           | 126 VC_392_0 | 126 | 0.9621 | 1          | 0.9621 | 0 | 0 | 0 | 1 Ref      |
| FR671405 | Unassigned | Unassigned | Unassigned | 414_0  | Clustered           | 37 VC_414_0  | 37  | 0.585  | 1          | 0.585  | 0 | 0 | 0 | 0.9474 Ref |
| FR671406 | Unassigned | Unassigned | Unassigned | 414_0  | Clustered           | 37 VC_414_0  | 37  | 0.585  | 1          | 0.585  | 0 | 0 | 0 | 0.9474 Ref |
| FR671407 | Unassigned | Unassigned | Unassigned | 414_0  | Clustered           | 37 VC_414_0  | 37  | 0.585  | 1          | 0.585  | 0 | 0 | 0 | 0.9474 Ref |
| FR671408 | Unassigned | Unassigned | Unassigned | 317_2  | Clustered           | 20 VC_317_2  | 20  | 0.1976 | 1          | 0.1976 | 0 | 0 | 0 | 0.6842 Ref |



|          |            |            |            |        |                     |              |     |        |            |        |   |   |   |        |     |
|----------|------------|------------|------------|--------|---------------------|--------------|-----|--------|------------|--------|---|---|---|--------|-----|
| FR671409 | Unassigned | Unassigned | Unassigned | 317_2  | Clustered           | 20 VC_317_2  | 20  | 0.1976 | 1          | 0.1976 | 0 | 0 | 0 | 0.6842 | Ref |
| FR671410 | Unassigned | Unassigned | Unassigned | 414_0  | Clustered           | 37 VC_414_0  | 37  | 0.585  | 1          | 0.585  | 0 | 0 | 0 | 0.9474 | Ref |
| FR671411 | Unassigned | Unassigned | Unassigned | 414_0  | Clustered           | 37 VC_414_0  | 37  | 0.585  | 1          | 0.585  | 0 | 0 | 0 | 0.9474 | Ref |
| FR682616 | Unassigned | Unassigned | Unassigned | 833_0  | Clustered           | 16 VC_833_0  | 16  | 0.9351 | 1          | 0.9351 | 0 | 0 | 0 | 1      | Ref |
| FR687252 | Unassigned | Unassigned | Unassigned | 110_0  | Clustered           | 4 VC_110_0   | 4   | 0.1143 | 0.99998732 | 0.1143 | 0 | 0 | 0 | 1      | Ref |
| FR719956 | Unassigned | Unassigned | Unassigned | 833_0  | Clustered           | 16 VC_833_0  | 16  | 0.9351 | 1          | 0.9351 | 0 | 0 | 0 | 1      | Ref |
| FR751545 | Unassigned | Unassigned | Unassigned | 156_0  | Clustered           | 12 VC_156_0  | 12  | 0.9062 | 1          | 0.9062 | 0 | 0 | 0 | 1      | Ref |
| FR775895 | Unassigned | Unassigned | Unassigned | 848_0  | Clustered           | 28 VC_848_0  | 28  | 0.7927 | 1          | 0.7927 | 0 | 0 | 0 | 1      | Ref |
| FR823298 | Unassigned | Unassigned | Unassigned | 130_0  | Clustered           | 19 VC_130_0  | 19  | 0.6068 | 1          | 0.6068 | 0 | 0 | 0 | 1      | Ref |
| FR823450 | Unassigned | Unassigned | Unassigned | 844_0  | Clustered           | 27 VC_844_0  | 27  | 0.9385 | 1          | 0.9385 | 0 | 0 | 0 | 1      | Ref |
| FR852584 | Unassigned | Unassigned | Unassigned | 149_8  | Clustered           | 66 VC_149_8  | 66  | 0.4565 | 1          | 0.4565 | 0 | 0 | 0 | 0.8182 | Ref |
| GQ141189 | Unassigned | Unassigned | Unassigned | 852_0  | Clustered           | 2 VC_852_0   | 2   | 0.4064 | 0.94189878 | 0.3828 | 0 | 0 | 0 | 1      | Ref |
| GQ149088 | Unassigned | Unassigned | Unassigned | 743_0  | Clustered           | 15 VC_743_0  | 15  | 1      | 1          | 1      | 0 | 0 | 0 | 1      | Ref |
| GQ153912 | Unassigned | Unassigned | Unassigned | 303_0  | Clustered           | 155 VC_303_0 | 155 | 0.9979 | 1          | 0.9979 | 0 | 0 | 0 | 1      | Ref |
| GQ153913 | Unassigned | Unassigned | Unassigned | 303_0  | Clustered           | 155 VC_303_0 | 155 | 0.9979 | 1          | 0.9979 | 0 | 0 | 0 | 1      | Ref |
| GQ153914 | Unassigned | Unassigned | Unassigned | 303_0  | Clustered           | 155 VC_303_0 | 155 | 0.9979 | 1          | 0.9979 | 0 | 0 | 0 | 1      | Ref |
| GQ153915 | Unassigned | Unassigned | Unassigned | 303_0  | Clustered           | 155 VC_303_0 | 155 | 0.9979 | 1          | 0.9979 | 0 | 0 | 0 | 1      | Ref |
| GQ153916 | Unassigned | Unassigned | Unassigned | 61_0   | Clustered           | 12 VC_61_0   | 12  | 0.7633 | 1          | 0.7633 | 0 | 0 | 0 | 1      | Ref |
| GQ153917 | Unassigned | Unassigned | Unassigned | 61_0   | Clustered           | 12 VC_61_0   | 12  | 0.7633 | 1          | 0.7633 | 0 | 0 | 0 | 1      | Ref |
| GQ153918 | Unassigned | Unassigned | Unassigned | 61_0   | Clustered           | 12 VC_61_0   | 12  | 0.7633 | 1          | 0.7633 | 0 | 0 | 0 | 1      | Ref |
| GQ153919 | Unassigned | Unassigned | Unassigned | 61_0   | Clustered           | 12 VC_61_0   | 12  | 0.7633 | 1          | 0.7633 | 0 | 0 | 0 | 1      | Ref |
| GQ153920 | Unassigned | Unassigned | Unassigned | 360_0  | Clustered           | 358 VC_360_0 | 358 | 0.9615 | 1          | 0.9615 | 0 | 0 | 0 | 1      | Ref |
| GQ153921 | Unassigned | Unassigned | Unassigned | 362_0  | Clustered           | 2 VC_362_0   | 2   | 0.002  | 0.83307735 | 0.0017 | 0 | 0 | 0 | 1      | Ref |
| GQ153922 | Unassigned | Unassigned | Unassigned | 360_0  | Clustered           | 358 VC_360_0 | 358 | 0.9615 | 1          | 0.9615 | 0 | 0 | 0 | 1      | Ref |
| GQ153923 | Unassigned | Unassigned | Unassigned | 360_0  | Clustered           | 358 VC_360_0 | 358 | 0.9615 | 1          | 0.9615 | 0 | 0 | 0 | 1      | Ref |
| GQ241246 | Unassigned | Unassigned | Unassigned | 855_0  | Clustered           | 2 VC_855_0   | 2   | 0.0285 | 0.89378929 | 0.0255 | 0 | 0 | 0 | 1      | Ref |
| GQ303259 | Unassigned | Unassigned | Unassigned | 371_3  | Clustered           | 22 VC_371_3  | 22  | 0.0787 | 1          | 0.0787 | 0 | 0 | 0 | 0.9048 | Ref |
| GQ303260 | Unassigned | Unassigned | Unassigned | 558_1  | Clustered           | 2 VC_558_1   | 2   | 0.0032 | 0.78405032 | 0.0025 | 0 | 0 | 0 | 0      | Ref |
| GQ303261 | Unassigned | Unassigned | Unassigned | 761_0  | Clustered           | 67 VC_761_0  | 67  | 0.8947 | 1          | 0.8947 | 0 | 0 | 0 | 1      | Ref |
| GQ303262 | Unassigned | Unassigned | Unassigned | 558_82 | Clustered           | 3 VC_558_82  | 3   | 0.0064 | 0.88433874 | 0.0057 | 0 | 0 | 0 | 0.6667 | Ref |
| GQ303263 | Unassigned | Unassigned | Unassigned | 517_1  | Clustered           | 108 VC_517_1 | 108 | 0.8483 | 1          | 0.8483 | 0 | 0 | 0 | 0.9955 | Ref |
| GQ303264 | Unassigned | Unassigned | Unassigned | 371_15 | Clustered           | 44 VC_371_15 | 44  | 0.1391 | 1          | 0.1391 | 0 | 0 | 0 | 0.7474 | Ref |
| GQ303265 | Unassigned | Unassigned | Unassigned | 551_7  | Clustered           | 28 VC_551_7  | 28  | 0.1661 | 1          | 0.1661 | 0 | 0 | 0 | 0.8519 | Ref |
| GQ303266 | Unassigned | Unassigned | Unassigned | 371_15 | Clustered           | 44 VC_371_15 | 44  | 0.1391 | 1          | 0.1391 | 0 | 0 | 0 | 0.7474 | Ref |
| GQ357916 | Unassigned | Unassigned | Unassigned | 50_0   | Clustered           | 9 VC_50_0    | 9   | 0.5531 | 1          | 0.5531 | 0 | 0 | 0 | 1      | Ref |
| GQ379227 | Unassigned | Unassigned | Unassigned | 374_0  | Clustered           | 2 VC_374_0   | 2   | 0.1258 | 0.95578317 | 0.1203 | 0 | 0 | 0 | 1      | Ref |
| GQ398772 | Unassigned | Unassigned | Unassigned | 10_0   | Clustered           | 25 VC_10_0   | 25  | 0.3467 | 1          | 0.3467 | 0 | 0 | 0 | 0.9733 | Ref |
| GQ403788 | Unassigned | Unassigned | Unassigned | 740_0  | Clustered           | 3 VC_740_0   | 3   | 0.202  | 0.99811828 | 0.2016 | 0 | 0 | 0 | 1      | Ref |
| GQ403789 | Unassigned | Unassigned | Unassigned | 27_0   | Clustered           | 2 VC_27_0    | 2   | 1      | 1          | 1      | 0 | 0 | 0 | 1      | Ref |
| GQ413937 | Unassigned | Unassigned | Unassigned | 823_0  | Clustered           | 124 VC_823_0 | 124 | 0.9492 | 1          | 0.9492 | 0 | 0 | 0 | 1      | Ref |
| GQ413938 | Unassigned | Unassigned | Unassigned | 111_0  | Clustered           | 91 VC_111_0  | 91  | 0.9587 | 1          | 0.9587 | 0 | 0 | 0 | 1      | Ref |
| GQ421471 | Unassigned | Unassigned | Unassigned | 280_0  | Clustered           | 2 VC_280_0   | 2   | 0.34   | 0.95158328 | 0.3235 | 0 | 0 | 0 | 1      | Ref |
| GQ422450 | Unassigned | Unassigned | Unassigned | 28_1   | Clustered           | 53 VC_28_1   | 53  | 0.7164 | 1          | 0.7164 | 0 | 0 | 0 | 0.9325 | Ref |
| GQ422451 | Unassigned | Unassigned | Unassigned | 28_1   | Clustered           | 53 VC_28_1   | 53  | 0.7164 | 1          | 0.7164 | 0 | 0 | 0 | 0.9325 | Ref |
| GQ443085 | Unassigned | Unassigned | Unassigned | 815_0  | Clustered           | 8 VC_815_0   | 8   | 0.9801 | 1          | 0.9801 | 0 | 0 | 0 | 1      | Ref |
| GQ451696 | Unassigned | Unassigned | Unassigned | 862_0  | Clustered           | 11 VC_862_0  | 11  | 0.6745 | 1          | 0.6745 | 0 | 0 | 0 | 1      | Ref |
| GQ452243 | Unassigned | Unassigned | Unassigned | 267_0  | Clustered           | 2 VC_267_0   | 2   | 0.0988 | 0.95557934 | 0.0945 | 0 | 0 | 0 | 1      | Ref |
| GQ468526 | Unassigned | Unassigned | Unassigned | 386_0  | Clustered           | 49 VC_386_0  | 49  | 0.7941 | 1          | 0.7941 | 0 | 0 | 0 | 1      | Ref |
| GQ478081 | Unassigned | Unassigned | Unassigned | 774_0  | Clustered           | 5 VC_774_0   | 5   | 0.3282 | 0.99999996 | 0.3282 | 0 | 0 | 0 | 1      | Ref |
| GQ478082 | Unassigned | Unassigned | Unassigned | 774_0  | Clustered           | 5 VC_774_0   | 5   | 0.3282 | 0.99999996 | 0.3282 | 0 | 0 | 0 | 1      | Ref |
| GQ478083 | Unassigned | Unassigned | Unassigned | 774_0  | Clustered           | 5 VC_774_0   | 5   | 0.3282 | 0.99999996 | 0.3282 | 0 | 0 | 0 | 1      | Ref |
| GQ478084 | Unassigned | Unassigned | Unassigned | 774_0  | Clustered           | 5 VC_774_0   | 5   | 0.3282 | 0.99999996 | 0.3282 | 0 | 0 | 0 | 1      | Ref |
| GQ478085 | Unassigned | Unassigned | Unassigned | 774_0  | Clustered           | 5 VC_774_0   | 5   | 0.3282 | 0.99999996 | 0.3282 | 0 | 0 | 0 | 1      | Ref |
| GQ502199 | Unassigned | Unassigned | Unassigned | 835_0  | Clustered           | 67 VC_835_0  | 67  | 0.9624 | 1          | 0.9624 | 0 | 0 | 0 | 1      | Ref |
| GQ866233 | Unassigned | Unassigned | Unassigned | 426_0  | Clustered           | 2 VC_426_0   | 2   | 0.1976 | 0.95643941 | 0.189  | 0 | 0 | 0 | 1      | Ref |
| GQ915271 | Unassigned | Unassigned | Unassigned | 7_0    | Clustered           | 28 VC_7_0    | 28  | 0.3916 | 1          | 0.3916 | 0 | 0 | 0 | 0.9947 | Ref |
| GQ919031 | Unassigned | Unassigned | Unassigned | 864_0  | Clustered           | 2 VC_864_0   | 2   | 1      | 1          | 1      | 0 | 0 | 0 | 1      | Ref |
| GQ979703 | Unassigned | Unassigned | Unassigned | 202_0  | Clustered           | 102 VC_202_0 | 102 | 0.4049 | 1          | 0.4049 | 0 | 0 | 0 | 0.7876 | Ref |
| GQ981382 | Unassigned | Unassigned | Unassigned | 290_1  | Clustered           | 8 VC_290_1   | 8   | 0.0757 | 1          | 0.0757 | 0 | 0 | 0 | 0.8571 | Ref |
| GU060500 | Unassigned | Unassigned | Unassigned | 520_31 | Clustered           | 11 VC_520_31 | 11  | 0.0897 | 1          | 0.0897 | 0 | 0 | 0 | 0.6    | Ref |
| GU070616 | Unassigned | Unassigned | Unassigned | 582_5  | Clustered           | 4 VC_582_5   | 4   | 0.0528 | 0.99935625 | 0.0527 | 0 | 0 | 0 | 0.8333 | Ref |
| GU071091 | Unassigned | Unassigned | Unassigned | 392_0  | Clustered           | 126 VC_392_0 | 126 | 0.9621 | 1          | 0.9621 | 0 | 0 | 0 | 1      | Ref |
| GU071092 | Unassigned | Unassigned | Unassigned | 432_9  | Clustered           | 3 VC_432_9   | 3   | 0.0372 | 0.99851312 | 0.0371 | 0 | 0 | 0 | 1      | Ref |
| GU071093 | Unassigned | Unassigned | Unassigned | 340_0  | Clustered           | 31 VC_340_0  | 31  | 0.9549 | 1          | 0.9549 | 0 | 0 | 0 | 1      | Ref |
| GU071094 | Unassigned | Unassigned | Unassigned | 655_8  | Clustered/Singleton | 1 VC_655_8   | 1   | 0      | 1          | 0      | 0 | 0 | 0 | 1      | Ref |
| GU071095 | Unassigned | Unassigned | Unassigned | 432_2  | Clustered/Singleton | 1 VC_432_2   | 1   | 0      | 1          | 0      | 0 | 0 | 0 | 1      | Ref |
| GU071097 | Unassigned | Unassigned | Unassigned | 655_9  | Clustered/Singleton | 1 VC_655_9   | 1   | 0      | 1          | 0      | 0 | 0 | 0 | 1      | Ref |
| GU071098 | Unassigned | Unassigned | Unassigned | 432_10 | Clustered           | 2 VC_432_10  | 2   | 0.0216 | 0.95771017 | 0.0207 | 0 | 0 | 0 | 1      | Ref |
| GU071099 | Unassigned | Unassigned | Unassigned | 655_0  | Clustered           | 2 VC_655_0   | 2   | 0.0111 | 0.95704495 | 0.0106 | 0 | 0 | 0 | 1      | Ref |
| GU071100 | Unassigned | Unassigned | Unassigned | 340_0  | Clustered           | 31 VC_340_0  | 31  | 0.9549 | 1          | 0.9549 | 0 | 0 | 0 | 1      | Ref |
| GU071102 | Unassigned | Unassigned | Unassigned | 340_0  | Clustered           | 31 VC_340_0  | 31  | 0.9549 | 1          | 0.9549 | 0 | 0 | 0 | 1      | Ref |
| GU071103 | Unassigned | Unassigned | Unassigned | 655_1  | Clustered/Singleton | 1 VC_655_1   | 1   | 0      | 1          | 0      | 0 | 0 | 0 | 1      | Ref |
| GU071104 | Unassigned | Unassigned | Unassigned | 340_0  | Clustered           | 31 VC_340_0  | 31  | 0.9549 | 1          | 0.9549 | 0 | 0 | 0 | 1      | Ref |
| GU071105 | Unassigned | Unassigned | Unassigned | 433_4  | Clustered           | 9 VC_433_4   | 9   | 0.1285 | 1          | 0.1285 | 0 | 0 | 0 | 1      | Ref |
| GU071106 | Unassigned | Unassigned | Unassigned | 655_6  | Clustered           | 2 VC_655_6   | 2   | 0.0078 | 0.95775168 | 0.0075 | 0 | 0 | 0 | 1      | Ref |
| GU071107 | Unassigned | Unassigned | Unassigned | 340_0  | Clustered           | 31 VC_340_0  | 31  | 0.9549 | 1          | 0.9549 | 0 | 0 | 0 | 1      | Ref |
| GU080336 | Unassigned | Unassigned | Unassigned | 611_0  | Clustered           | 2 VC_611_0   | 2   | 1      | 1          | 1      | 0 | 0 | 0 | 1      | Ref |
| GU169904 | Unassigned | Unassigned | Unassigned | 329_15 | Clustered/Singleton | 1 VC_329_15  | 1   | 0      | 1          | 0      | 0 | 0 | 0 | 1      | Ref |
| GU196277 | Unassigned | Unassigned | Unassigned | 638_0  | Clustered           | 45 VC_638_0  | 45  | 0.7741 | 1          | 0.7741 | 0 | 0 | 0 | 1      | Ref |
| GU196278 | Unassigned | Unassigned | Unassigned | 638_0  | Clustered           | 45 VC_638_0  | 45  | 0.7741 | 1          | 0.7741 | 0 | 0 | 0 | 1      | Ref |
| GU196279 | Unassigned | Unassigned | Unassigned | 638_0  | Clustered           | 45 VC_638_0  | 45  | 0.7741 | 1          | 0.7741 | 0 | 0 | 0 | 1      | Ref |



|          |            |            |            |        |                     |              |     |        |            |        |   |   |   |            |
|----------|------------|------------|------------|--------|---------------------|--------------|-----|--------|------------|--------|---|---|---|------------|
| GU196280 | Unassigned | Unassigned | Unassigned | 638_0  | Clustered           | 45 VC_638_0  | 45  | 0.7741 | 1          | 0.7741 | 0 | 0 | 0 | 1 Ref      |
| GU196281 | Unassigned | Unassigned | Unassigned | 638_0  | Clustered           | 45 VC_638_0  | 45  | 0.7741 | 1          | 0.7741 | 0 | 0 | 0 | 1 Ref      |
| GU229986 | Unassigned | Unassigned | Unassigned | 652_0  | Clustered           | 4 VC_652_0   | 4   | 0.4743 | 0.99998076 | 0.4743 | 0 | 0 | 0 | 1 Ref      |
| GU247132 | Unassigned | Unassigned | Unassigned | 325_14 | Clustered           | 3 VC_325_14  | 3   | 0.0094 | 0.99859159 | 0.0094 | 0 | 0 | 0 | 1 Ref      |
| GU247133 | Unassigned | Unassigned | Unassigned | 371_16 | Clustered           | 42 VC_371_16 | 42  | 0.1341 | 1          | 0.1341 | 0 | 0 | 0 | 0.7282 Ref |
| GU247134 | Unassigned | Unassigned | Unassigned | 371_16 | Clustered           | 42 VC_371_16 | 42  | 0.1341 | 1          | 0.1341 | 0 | 0 | 0 | 0.7282 Ref |
| GU295964 | Unassigned | Unassigned | Unassigned | 668_0  | Clustered           | 25 VC_668_0  | 25  | 0.5539 | 1          | 0.5539 | 0 | 0 | 0 | 0.96 Ref   |
| GU296433 | Unassigned | Unassigned | Unassigned | 844_0  | Clustered           | 27 VC_844_0  | 27  | 0.9385 | 1          | 0.9385 | 0 | 0 | 0 | 1 Ref      |
| GU321093 | Unassigned | Unassigned | Unassigned | 834_0  | Clustered           | 7 VC_834_0   | 7   | 0.9845 | 0.94276893 | 0.9282 | 0 | 0 | 0 | 1 Ref      |
| GU323708 | Unassigned | Unassigned | Unassigned | 381_0  | Clustered           | 2 VC_381_0   | 2   | 0.0829 | 0.95381392 | 0.079  | 0 | 0 | 0 | 1 Ref      |
| GU339467 | Unassigned | Unassigned | Unassigned | 216_3  | Clustered           | 8 VC_216_3   | 8   | 0.0701 | 1          | 0.0701 | 0 | 0 | 0 | 0.8571 Ref |
| GU385905 | Unassigned | Unassigned | Unassigned | 303_0  | Clustered           | 155 VC_303_0 | 155 | 0.9979 | 1          | 0.9979 | 0 | 0 | 0 | 1 Ref      |
| GU393987 | Unassigned | Unassigned | Unassigned | 70_0   | Clustered           | 27 VC_70_0   | 27  | 0.5981 | 1          | 0.5981 | 0 | 0 | 0 | 0.9886 Ref |
| GU459069 | Unassigned | Unassigned | Unassigned | 443_1  | Clustered           | 2 VC_443_1   | 2   | 0.0287 | 0.89347378 | 0.0257 | 0 | 0 | 0 | 1 Ref      |
| GU477322 | Unassigned | Unassigned | Unassigned | 9_0    | Clustered           | 38 VC_9_0    | 38  | 0.4895 | 1          | 0.4895 | 0 | 0 | 0 | 1 Ref      |
| GU557055 | Unassigned | Unassigned | Unassigned | 305_0  | Clustered           | 12 VC_305_0  | 12  | 0.5745 | 1          | 0.5745 | 0 | 0 | 0 | 0.8485 Ref |
| GU573886 | Unassigned | Unassigned | Unassigned | 28_1   | Clustered           | 53 VC_28_1   | 53  | 0.7164 | 1          | 0.7164 | 0 | 0 | 0 | 0.9325 Ref |
| GU580941 | Unassigned | Unassigned | Unassigned | 799_0  | Clustered           | 2 VC_799_0   | 2   | 0.0367 | 0.95547665 | 0.035  | 0 | 0 | 0 | 1 Ref      |
| GU580942 | Unassigned | Unassigned | Unassigned | 799_0  | Clustered           | 2 VC_799_0   | 2   | 0.0367 | 0.95547665 | 0.035  | 0 | 0 | 0 | 1 Ref      |
| GU583987 | Unassigned | Unassigned | Unassigned | 130_0  | Clustered           | 19 VC_130_0  | 19  | 0.6068 | 1          | 0.6068 | 0 | 0 | 0 | 1 Ref      |
| GU595417 | Unassigned | Unassigned | Unassigned | 452_0  | Clustered           | 66 VC_452_0  | 66  | 0.9248 | 1          | 0.9248 | 0 | 0 | 0 | 1 Ref      |
| GU815091 | Unassigned | Unassigned | Unassigned | 79_7   | Clustered           | 33 VC_79_7   | 33  | 0.216  | 1          | 0.216  | 0 | 0 | 0 | 0.8409 Ref |
| GU903191 | Unassigned | Unassigned | Unassigned | 125_0  | Clustered           | 17 VC_125_0  | 17  | 0.9244 | 1          | 0.9244 | 0 | 0 | 0 | 1 Ref      |
| GU911303 | Unassigned | Unassigned | Unassigned | 1_0    | Clustered           | 54 VC_1_0    | 54  | 0.8527 | 1          | 0.8527 | 0 | 0 | 0 | 1 Ref      |
| GU911304 | Unassigned | Unassigned | Unassigned | 3_0    | Clustered           | 17 VC_3_0    | 17  | 0.5639 | 1          | 0.5639 | 0 | 0 | 0 | 1 Ref      |
| GU911519 | Unassigned | Unassigned | Unassigned | 492_3  | Clustered/Singleton | 1 VC_492_3   | 1   | 0      | 1          | 0      | 0 | 0 | 0 | 1 Ref      |
| GU936715 | Unassigned | Unassigned | Unassigned | 873_0  | Clustered           | 3 VC_873_0   | 3   | 0.9107 | 0.98376334 | 0.8959 | 0 | 0 | 0 | 1 Ref      |
| GU942563 | Unassigned | Unassigned | Unassigned | 875_0  | Clustered           | 10 VC_875_0  | 10  | 0.988  | 0.99948433 | 0.9875 | 0 | 0 | 0 | 1 Ref      |
| GU943054 | Unassigned | Unassigned | Unassigned | 340_0  | Clustered           | 31 VC_340_0  | 31  | 0.9549 | 1          | 0.9549 | 0 | 0 | 0 | 1 Ref      |
| GU988610 | Unassigned | Unassigned | Unassigned | 76_0   | Clustered           | 37 VC_76_0   | 37  | 0.9403 | 1          | 0.9403 | 0 | 0 | 0 | 1 Ref      |
| HE584812 | Unassigned | Unassigned | Unassigned | 179_0  | Clustered           | 53 VC_179_0  | 53  | 0.9137 | 1          | 0.9137 | 0 | 0 | 0 | 1 Ref      |
| HE600015 | Unassigned | Unassigned | Unassigned | 131_0  | Clustered           | 17 VC_131_0  | 17  | 0.2671 | 1          | 0.2671 | 0 | 0 | 0 | 1 Ref      |
| HE608841 | Unassigned | Unassigned | Unassigned | 830_0  | Clustered           | 6 VC_830_0   | 6   | 0.6536 | 1          | 0.6536 | 0 | 0 | 0 | 1 Ref      |
| HE664024 | Unassigned | Unassigned | Unassigned | 42_0   | Clustered           | 49 VC_42_0   | 49  | 0.4517 | 1          | 0.4517 | 0 | 0 | 0 | 0.8597 Ref |
| HE775250 | Unassigned | Unassigned | Unassigned | 637_0  | Clustered           | 115 VC_637_0 | 115 | 0.731  | 1          | 0.731  | 0 | 0 | 0 | 0.8764 Ref |
| HE806280 | Unassigned | Unassigned | Unassigned | 698_0  | Clustered           | 26 VC_698_0  | 26  | 0.9366 | 1          | 0.9366 | 0 | 0 | 0 | 1 Ref      |
| HE815464 | Unassigned | Unassigned | Unassigned | 843_0  | Clustered           | 5 VC_843_0   | 5   | 0.2843 | 0.99999994 | 0.2843 | 0 | 0 | 0 | 1 Ref      |
| HE858210 | Unassigned | Unassigned | Unassigned | 669_1  | Clustered           | 10 VC_669_1  | 10  | 0.1268 | 1          | 0.1268 | 0 | 0 | 0 | 0.9778 Ref |
| HE861935 | Unassigned | Unassigned | Unassigned | 254_0  | Clustered           | 46 VC_254_0  | 46  | 0.5159 | 1          | 0.5159 | 0 | 0 | 0 | 1 Ref      |
| HE956704 | Unassigned | Unassigned | Unassigned | 308_0  | Clustered           | 4 VC_308_0   | 4   | 0.5014 | 0.99997418 | 0.5013 | 0 | 0 | 0 | 1 Ref      |
| HE956707 | Unassigned | Unassigned | Unassigned | 878_0  | Clustered           | 32 VC_878_0  | 32  | 0.9965 | 1          | 0.9965 | 0 | 0 | 0 | 1 Ref      |
| HE956708 | Unassigned | Unassigned | Unassigned | 191_26 | Clustered/Singleton | 1 VC_191_26  | 1   | 0      | 1          | 0      | 0 | 0 | 0 | 1 Ref      |
| HE956709 | Unassigned | Unassigned | Unassigned | 490_3  | Clustered           | 2 VC_490_3   | 2   | 0.0135 | 0.95703149 | 0.0129 | 0 | 0 | 0 | 1 Ref      |
| HE956710 | Unassigned | Unassigned | Unassigned | 878_0  | Clustered           | 32 VC_878_0  | 32  | 0.9965 | 1          | 0.9965 | 0 | 0 | 0 | 1 Ref      |
| HE956711 | Unassigned | Unassigned | Unassigned | 283_69 | Clustered/Singleton | 1 VC_283_69  | 1   | 0      | 1          | 0      | 0 | 0 | 0 | 1 Ref      |
| HE962497 | Unassigned | Unassigned | Unassigned | 108_0  | Clustered           | 33 VC_108_0  | 33  | 0.949  | 1          | 0.949  | 0 | 0 | 0 | 1 Ref      |
| HE978309 | Unassigned | Unassigned | Unassigned | 590_0  | Clustered           | 27 VC_590_0  | 27  | 0.9947 | 1          | 0.9947 | 0 | 0 | 0 | 1 Ref      |
| HE981739 | Unassigned | Unassigned | Unassigned | 669_1  | Clustered           | 10 VC_669_1  | 10  | 0.1268 | 1          | 0.1268 | 0 | 0 | 0 | 0.9778 Ref |
| HE983844 | Unassigned | Unassigned | Unassigned | 472_0  | Clustered           | 47 VC_472_0  | 47  | 0.9025 | 1          | 0.9025 | 0 | 0 | 0 | 1 Ref      |
| HE983845 | Unassigned | Unassigned | Unassigned | 76_0   | Clustered           | 37 VC_76_0   | 37  | 0.9403 | 1          | 0.9403 | 0 | 0 | 0 | 1 Ref      |
| HF543949 | Unassigned | Unassigned | Unassigned | 472_0  | Clustered           | 47 VC_472_0  | 47  | 0.9025 | 1          | 0.9025 | 0 | 0 | 0 | 1 Ref      |
| HF563658 | Unassigned | Unassigned | Unassigned | 412_0  | Clustered           | 39 VC_412_0  | 39  | 0.845  | 1          | 0.845  | 0 | 0 | 0 | 1 Ref      |
| HF569088 | Unassigned | Unassigned | Unassigned | 879_0  | Clustered           | 36 VC_879_0  | 36  | 0.994  | 1          | 0.994  | 0 | 0 | 0 | 1 Ref      |
| HF569089 | Unassigned | Unassigned | Unassigned | 879_0  | Clustered           | 36 VC_879_0  | 36  | 0.994  | 1          | 0.994  | 0 | 0 | 0 | 1 Ref      |
| HF569090 | Unassigned | Unassigned | Unassigned | 879_0  | Clustered           | 36 VC_879_0  | 36  | 0.994  | 1          | 0.994  | 0 | 0 | 0 | 1 Ref      |
| HF569091 | Unassigned | Unassigned | Unassigned | 879_0  | Clustered           | 36 VC_879_0  | 36  | 0.994  | 1          | 0.994  | 0 | 0 | 0 | 1 Ref      |
| HF569092 | Unassigned | Unassigned | Unassigned | 879_0  | Clustered           | 36 VC_879_0  | 36  | 0.994  | 1          | 0.994  | 0 | 0 | 0 | 1 Ref      |
| HF937074 | Unassigned | Unassigned | Unassigned | 96_0   | Clustered           | 30 VC_96_0   | 30  | 0.718  | 1          | 0.718  | 0 | 0 | 0 | 1 Ref      |
| HG007973 | Unassigned | Unassigned | Unassigned | 880_0  | Clustered           | 2 VC_880_0   | 2   | 0.1614 | 0.83455073 | 0.1347 | 0 | 0 | 0 | 1 Ref      |
| HG315669 | Unassigned | Unassigned | Unassigned | 177_0  | Clustered           | 5 VC_177_0   | 5   | 0.7468 | 0.99885646 | 0.746  | 0 | 0 | 0 | 1 Ref      |
| HG322870 | Unassigned | Unassigned | Unassigned | 446_0  | Clustered           | 4 VC_446_0   | 4   | 0.754  | 0.99987768 | 0.7539 | 0 | 0 | 0 | 1 Ref      |
| HG380752 | Unassigned | Unassigned | Unassigned | 254_0  | Clustered           | 46 VC_254_0  | 46  | 0.5159 | 1          | 0.5159 | 0 | 0 | 0 | 1 Ref      |
| HG424323 | Unassigned | Unassigned | Unassigned | 254_0  | Clustered           | 46 VC_254_0  | 46  | 0.5159 | 1          | 0.5159 | 0 | 0 | 0 | 1 Ref      |
| HG428758 | Unassigned | Unassigned | Unassigned | 879_0  | Clustered           | 36 VC_879_0  | 36  | 0.994  | 1          | 0.994  | 0 | 0 | 0 | 1 Ref      |
| HG518155 | Unassigned | Unassigned | Unassigned | 472_0  | Clustered           | 47 VC_472_0  | 47  | 0.9025 | 1          | 0.9025 | 0 | 0 | 0 | 1 Ref      |
| HG531805 | Unassigned | Unassigned | Unassigned | 139_1  | Clustered           | 4 VC_139_1   | 4   | 0.1775 | 0.99998609 | 0.1775 | 0 | 0 | 0 | 1 Ref      |
| HG792102 | Unassigned | Unassigned | Unassigned | 42_0   | Clustered           | 49 VC_42_0   | 49  | 0.4517 | 1          | 0.4517 | 0 | 0 | 0 | 0.8597 Ref |
| HG792103 | Unassigned | Unassigned | Unassigned | 42_0   | Clustered           | 49 VC_42_0   | 49  | 0.4517 | 1          | 0.4517 | 0 | 0 | 0 | 0.8597 Ref |
| HG792104 | Unassigned | Unassigned | Unassigned | 42_0   | Clustered           | 49 VC_42_0   | 49  | 0.4517 | 1          | 0.4517 | 0 | 0 | 0 | 0.8597 Ref |
| HG792105 | Unassigned | Unassigned | Unassigned | 42_0   | Clustered           | 49 VC_42_0   | 49  | 0.4517 | 1          | 0.4517 | 0 | 0 | 0 | 0.8597 Ref |
| HG793132 | Unassigned | Unassigned | Unassigned | 70_0   | Clustered           | 27 VC_70_0   | 27  | 0.5981 | 1          | 0.5981 | 0 | 0 | 0 | 0.9886 Ref |
| HG796219 | Unassigned | Unassigned | Unassigned | 70_0   | Clustered           | 27 VC_70_0   | 27  | 0.5981 | 1          | 0.5981 | 0 | 0 | 0 | 0.9886 Ref |
| HG796220 | Unassigned | Unassigned | Unassigned | 70_0   | Clustered           | 27 VC_70_0   | 27  | 0.5981 | 1          | 0.5981 | 0 | 0 | 0 | 0.9886 Ref |
| HG796221 | Unassigned | Unassigned | Unassigned | 70_0   | Clustered           | 27 VC_70_0   | 27  | 0.5981 | 1          | 0.5981 | 0 | 0 | 0 | 0.9886 Ref |
| HG796225 | Unassigned | Unassigned | Unassigned | 647_0  | Clustered           | 11 VC_647_0  | 11  | 0.598  | 1          | 0.598  | 0 | 0 | 0 | 1 Ref      |
| HG798901 | Unassigned | Unassigned | Unassigned | 647_0  | Clustered           | 11 VC_647_0  | 11  | 0.598  | 1          | 0.598  | 0 | 0 | 0 | 1 Ref      |
| HG799490 | Unassigned | Unassigned | Unassigned | 414_0  | Clustered           | 37 VC_414_0  | 37  | 0.585  | 1          | 0.585  | 0 | 0 | 0 | 0.9474 Ref |
| HG799496 | Unassigned | Unassigned | Unassigned | 414_0  | Clustered           | 37 VC_414_0  | 37  | 0.585  | 1          | 0.585  | 0 | 0 | 0 | 0.9474 Ref |
| HG799497 | Unassigned | Unassigned | Unassigned | 414_0  | Clustered           | 37 VC_414_0  | 37  | 0.585  | 1          | 0.585  | 0 | 0 | 0 | 0.9474 Ref |
| HG803181 | Unassigned | Unassigned | Unassigned | 5_0    | Clustered           | 30 VC_5_0    | 30  | 0.9647 | 1          | 0.9647 | 0 | 0 | 0 | 1 Ref      |
| HG803182 | Unassigned | Unassigned | Unassigned | 42_0   | Clustered           | 49 VC_42_0   | 49  | 0.4517 | 1          | 0.4517 | 0 | 0 | 0 | 0.8597 Ref |



|          |            |            |            |         |                     |              |     |        |            |        |   |   |   |        |     |
|----------|------------|------------|------------|---------|---------------------|--------------|-----|--------|------------|--------|---|---|---|--------|-----|
| HG803183 | Unassigned | Unassigned | Unassigned | 42_0    | Clustered           | 49 VC_42_0   | 49  | 0.4517 | 1          | 0.4517 | 0 | 0 | 0 | 0.8597 | Ref |
| HG803184 | Unassigned | Unassigned | Unassigned | 42_0    | Clustered           | 49 VC_42_0   | 49  | 0.4517 | 1          | 0.4517 | 0 | 0 | 0 | 0.8597 | Ref |
| HG803185 | Unassigned | Unassigned | Unassigned | 42_0    | Clustered           | 49 VC_42_0   | 49  | 0.4517 | 1          | 0.4517 | 0 | 0 | 0 | 0.8597 | Ref |
| HG813241 | Unassigned | Unassigned | Unassigned | 451_0   | Clustered           | 80 VC_451_0  | 80  | 0.9991 | 1          | 0.9991 | 0 | 0 | 0 | 1      | Ref |
| HG818823 | Unassigned | Unassigned | Unassigned | 451_0   | Clustered           | 80 VC_451_0  | 80  | 0.9991 | 1          | 0.9991 | 0 | 0 | 0 | 1      | Ref |
| HG818824 | Unassigned | Unassigned | Unassigned | 451_0   | Clustered           | 80 VC_451_0  | 80  | 0.9991 | 1          | 0.9991 | 0 | 0 | 0 | 1      | Ref |
| HG934469 | Unassigned | Unassigned | Unassigned | 637_0   | Clustered           | 115 VC_637_0 | 115 | 0.731  | 1          | 0.731  | 0 | 0 | 0 | 0.8764 | Ref |
| HG934470 | Unassigned | Unassigned | Unassigned | 637_0   | Clustered           | 115 VC_637_0 | 115 | 0.731  | 1          | 0.731  | 0 | 0 | 0 | 0.8764 | Ref |
| HG962375 | Unassigned | Unassigned | Unassigned | 838_0   | Clustered           | 29 VC_838_0  | 29  | 0.8611 | 1          | 0.8611 | 0 | 0 | 0 | 1      | Ref |
| HG962376 | Unassigned | Unassigned | Unassigned | 749_0   | Clustered           | 40 VC_749_0  | 40  | 0.7517 | 1          | 0.7517 | 0 | 0 | 0 | 1      | Ref |
| HG992588 | Unassigned | Unassigned | Unassigned | 882_0   | Clustered           | 20 VC_882_0  | 20  | 0.9917 | 1          | 0.9917 | 0 | 0 | 0 | 1      | Ref |
| HG994092 | Unassigned | Unassigned | Unassigned | 823_0   | Clustered           | 124 VC_823_0 | 124 | 0.9492 | 1          | 0.9492 | 0 | 0 | 0 | 1      | Ref |
| HM004124 | Unassigned | Unassigned | Unassigned | 492_4   | Clustered/Singleton | 1 VC_492_4   | 1   | 0      | 1          | 0      | 0 | 0 | 0 | 1      | Ref |
| HM029250 | Unassigned | Unassigned | Unassigned | 474_0   | Clustered           | 14 VC_474_0  | 14  | 0.8466 | 1          | 0.8466 | 0 | 0 | 0 | 1      | Ref |
| HM032710 | Unassigned | Unassigned | Unassigned | 492_5   | Clustered/Singleton | 1 VC_492_5   | 1   | 0      | 1          | 0      | 0 | 0 | 0 | 1      | Ref |
| HM035024 | Unassigned | Unassigned | Unassigned | 575_0   | Clustered           | 35 VC_575_0  | 35  | 0.8815 | 1          | 0.8815 | 0 | 0 | 0 | 1      | Ref |
| HM035025 | Unassigned | Unassigned | Unassigned | 283_154 | Clustered/Singleton | 1 VC_283_154 | 1   | 0      | 1          | 0      | 0 | 0 | 0 | 1      | Ref |
| HM064452 | Unassigned | Unassigned | Unassigned | 53_0    | Clustered           | 5 VC_53_0    | 5   | 0.4977 | 0.99999808 | 0.4977 | 0 | 0 | 0 | 1      | Ref |
| HM066936 | Unassigned | Unassigned | Unassigned | 227_0   | Clustered           | 2 VC_227_0   | 2   | 0.3333 | 0          | 0      | 0 | 0 | 0 | 1      | Ref |
| HM071924 | Unassigned | Unassigned | Unassigned | 290_5   | Clustered           | 14 VC_290_5  | 14  | 0.1422 | 1          | 0.1422 | 0 | 0 | 0 | 0.9231 | Ref |
| HM072038 | Unassigned | Unassigned | Unassigned | 18_0    | Clustered           | 4 VC_18_0    | 4   | 0.9098 | 0.99982347 | 0.9098 | 0 | 0 | 0 | 1      | Ref |
| HM114315 | Unassigned | Unassigned | Unassigned | 492_6   | Clustered/Singleton | 1 VC_492_6   | 1   | 0      | 1          | 0      | 0 | 0 | 0 | 1      | Ref |
| HM134276 | Unassigned | Unassigned | Unassigned | 669_1   | Clustered           | 10 VC_669_1  | 10  | 0.1268 | 1          | 0.1268 | 0 | 0 | 0 | 0.9778 | Ref |
| HM137666 | Unassigned | Unassigned | Unassigned | 283_91  | Clustered           | 11 VC_283_91 | 11  | 0.0285 | 1          | 0.0285 | 0 | 0 | 0 | 1      | Ref |
| HM144387 | Unassigned | Unassigned | Unassigned | 884_1   | Clustered           | 8 VC_884_1   | 8   | 0.1102 | 0.9989323  | 0.1101 | 0 | 0 | 0 | 0.75   | Ref |
| HM150760 | Unassigned | Unassigned | Unassigned | 880_0   | Clustered           | 2 VC_880_0   | 2   | 0.1614 | 0.83455073 | 0.1347 | 0 | 0 | 0 | 1      | Ref |
| HM152763 | Unassigned | Unassigned | Unassigned | 887_0   | Clustered           | 18 VC_887_0  | 18  | 0.3663 | 1          | 0.3663 | 0 | 0 | 0 | 1      | Ref |
| HM152764 | Unassigned | Unassigned | Unassigned | 236_0   | Clustered           | 72 VC_236_0  | 72  | 0.8104 | 1          | 0.8104 | 0 | 0 | 0 | 1      | Ref |
| HM152765 | Unassigned | Unassigned | Unassigned | 518_0   | Clustered           | 6 VC_518_0   | 6   | 0.1295 | 1          | 0.1295 | 0 | 0 | 0 | 1      | Ref |
| HM152766 | Unassigned | Unassigned | Unassigned | 517_1   | Clustered           | 108 VC_517_1 | 108 | 0.8483 | 1          | 0.8483 | 0 | 0 | 0 | 0.9955 | Ref |
| HM152767 | Unassigned | Unassigned | Unassigned | 236_0   | Clustered           | 72 VC_236_0  | 72  | 0.8104 | 1          | 0.8104 | 0 | 0 | 0 | 1      | Ref |
| HM208303 | Unassigned | Unassigned | Unassigned | 39_0    | Clustered           | 35 VC_39_0   | 35  | 0.4337 | 1          | 0.4337 | 0 | 0 | 0 | 1      | Ref |
| HM208537 | Unassigned | Unassigned | Unassigned | 230_1   | Clustered/Singleton | 1 VC_230_1   | 1   | 0      | 1          | 0      | 0 | 0 | 0 | 1      | Ref |
| HM242243 | Unassigned | Unassigned | Unassigned | 94_0    | Clustered           | 2 VC_94_0    | 2   | 0.1304 | 0.95723134 | 0.1248 | 0 | 0 | 0 | 1      | Ref |
| HM368260 | Unassigned | Unassigned | Unassigned | 698_0   | Clustered           | 26 VC_698_0  | 26  | 0.9366 | 1          | 0.9366 | 0 | 0 | 0 | 1      | Ref |
| HM452125 | Unassigned | Unassigned | Unassigned | 600_2   | Clustered           | 10 VC_600_2  | 10  | 0.3041 | 1          | 0.3041 | 0 | 0 | 0 | 1      | Ref |
| HM461982 | Unassigned | Unassigned | Unassigned | 3_0     | Clustered           | 17 VC_3_0    | 17  | 0.5639 | 1          | 0.5639 | 0 | 0 | 0 | 1      | Ref |
| HM480106 | Unassigned | Unassigned | Unassigned | 873_0   | Clustered           | 3 VC_873_0   | 3   | 0.9107 | 0.98376334 | 0.8959 | 0 | 0 | 0 | 1      | Ref |
| HM480846 | Unassigned | Unassigned | Unassigned | 823_0   | Clustered           | 124 VC_823_0 | 124 | 0.9492 | 1          | 0.9492 | 0 | 0 | 0 | 1      | Ref |
| HM559717 | Unassigned | Unassigned | Unassigned | 340_0   | Clustered           | 31 VC_340_0  | 31  | 0.9549 | 1          | 0.9549 | 0 | 0 | 0 | 1      | Ref |
| HM563683 | Unassigned | Unassigned | Unassigned | 290_2   | Clustered           | 2 VC_290_2   | 2   | 0.0102 | 0.92371007 | 0.0094 | 0 | 0 | 0 | 1      | Ref |
| HM568888 | Unassigned | Unassigned | Unassigned | 733_0   | Clustered           | 5 VC_733_0   | 5   | 0.5111 | 0.99999994 | 0.5111 | 0 | 0 | 0 | 1      | Ref |
| HM588722 | Unassigned | Unassigned | Unassigned | 894_0   | Clustered           | 3 VC_894_0   | 3   | 0.6358 | 0.99692152 | 0.6338 | 0 | 0 | 0 | 1      | Ref |
| HM624080 | Unassigned | Unassigned | Unassigned | 179_0   | Clustered           | 53 VC_179_0  | 53  | 0.9137 | 1          | 0.9137 | 0 | 0 | 0 | 1      | Ref |
| HM640230 | Unassigned | Unassigned | Unassigned | 897_0   | Clustered           | 6 VC_897_0   | 6   | 0.4156 | 1          | 0.4156 | 0 | 0 | 0 | 1      | Ref |
| HM753658 | Unassigned | Unassigned | Unassigned | 303_0   | Clustered           | 155 VC_303_0 | 155 | 0.9979 | 1          | 0.9979 | 0 | 0 | 0 | 1      | Ref |
| HM753659 | Unassigned | Unassigned | Unassigned | 303_0   | Clustered           | 155 VC_303_0 | 155 | 0.9979 | 1          | 0.9979 | 0 | 0 | 0 | 1      | Ref |
| HM753660 | Unassigned | Unassigned | Unassigned | 303_0   | Clustered           | 155 VC_303_0 | 155 | 0.9979 | 1          | 0.9979 | 0 | 0 | 0 | 1      | Ref |
| HM753661 | Unassigned | Unassigned | Unassigned | 303_0   | Clustered           | 155 VC_303_0 | 155 | 0.9979 | 1          | 0.9979 | 0 | 0 | 0 | 1      | Ref |
| HM753662 | Unassigned | Unassigned | Unassigned | 303_0   | Clustered           | 155 VC_303_0 | 155 | 0.9979 | 1          | 0.9979 | 0 | 0 | 0 | 1      | Ref |
| HM753663 | Unassigned | Unassigned | Unassigned | 303_0   | Clustered           | 155 VC_303_0 | 155 | 0.9979 | 1          | 0.9979 | 0 | 0 | 0 | 1      | Ref |
| HM753664 | Unassigned | Unassigned | Unassigned | 303_0   | Clustered           | 155 VC_303_0 | 155 | 0.9979 | 1          | 0.9979 | 0 | 0 | 0 | 1      | Ref |
| HM753665 | Unassigned | Unassigned | Unassigned | 303_0   | Clustered           | 155 VC_303_0 | 155 | 0.9979 | 1          | 0.9979 | 0 | 0 | 0 | 1      | Ref |
| HM753666 | Unassigned | Unassigned | Unassigned | 303_0   | Clustered           | 155 VC_303_0 | 155 | 0.9979 | 1          | 0.9979 | 0 | 0 | 0 | 1      | Ref |
| HM753667 | Unassigned | Unassigned | Unassigned | 303_0   | Clustered           | 155 VC_303_0 | 155 | 0.9979 | 1          | 0.9979 | 0 | 0 | 0 | 1      | Ref |
| HM753668 | Unassigned | Unassigned | Unassigned | 303_0   | Clustered           | 155 VC_303_0 | 155 | 0.9979 | 1          | 0.9979 | 0 | 0 | 0 | 1      | Ref |
| HM753669 | Unassigned | Unassigned | Unassigned | 303_0   | Clustered           | 155 VC_303_0 | 155 | 0.9979 | 1          | 0.9979 | 0 | 0 | 0 | 1      | Ref |
| HM753670 | Unassigned | Unassigned | Unassigned | 303_0   | Clustered           | 155 VC_303_0 | 155 | 0.9979 | 1          | 0.9979 | 0 | 0 | 0 | 1      | Ref |
| HM753671 | Unassigned | Unassigned | Unassigned | 303_0   | Clustered           | 155 VC_303_0 | 155 | 0.9979 | 1          | 0.9979 | 0 | 0 | 0 | 1      | Ref |
| HM753672 | Unassigned | Unassigned | Unassigned | 303_0   | Clustered           | 155 VC_303_0 | 155 | 0.9979 | 1          | 0.9979 | 0 | 0 | 0 | 1      | Ref |
| HM753673 | Unassigned | Unassigned | Unassigned | 303_0   | Clustered           | 155 VC_303_0 | 155 | 0.9979 | 1          | 0.9979 | 0 | 0 | 0 | 1      | Ref |
| HM753674 | Unassigned | Unassigned | Unassigned | 303_0   | Clustered           | 155 VC_303_0 | 155 | 0.9979 | 1          | 0.9979 | 0 | 0 | 0 | 1      | Ref |
| HM753675 | Unassigned | Unassigned | Unassigned | 303_0   | Clustered           | 155 VC_303_0 | 155 | 0.9979 | 1          | 0.9979 | 0 | 0 | 0 | 1      | Ref |
| HM753676 | Unassigned | Unassigned | Unassigned | 303_0   | Clustered           | 155 VC_303_0 | 155 | 0.9979 | 1          | 0.9979 | 0 | 0 | 0 | 1      | Ref |
| HM753677 | Unassigned | Unassigned | Unassigned | 303_0   | Clustered           | 155 VC_303_0 | 155 | 0.9979 | 1          | 0.9979 | 0 | 0 | 0 | 1      | Ref |
| HM753678 | Unassigned | Unassigned | Unassigned | 303_0   | Clustered           | 155 VC_303_0 | 155 | 0.9979 | 1          | 0.9979 | 0 | 0 | 0 | 1      | Ref |
| HM753679 | Unassigned | Unassigned | Unassigned | 303_0   | Clustered           | 155 VC_303_0 | 155 | 0.9979 | 1          | 0.9979 | 0 | 0 | 0 | 1      | Ref |
| HM753680 | Unassigned | Unassigned | Unassigned | 303_0   | Clustered           | 155 VC_303_0 | 155 | 0.9979 | 1          | 0.9979 | 0 | 0 | 0 | 1      | Ref |
| HM753681 | Unassigned | Unassigned | Unassigned | 303_0   | Clustered           | 155 VC_303_0 | 155 | 0.9979 | 1          | 0.9979 | 0 | 0 | 0 | 1      | Ref |
| HM753682 | Unassigned | Unassigned | Unassigned | 303_0   | Clustered           | 155 VC_303_0 | 155 | 0.9979 | 1          | 0.9979 | 0 | 0 | 0 | 1      | Ref |
| HM753683 | Unassigned | Unassigned | Unassigned | 303_0   | Clustered           | 155 VC_303_0 | 155 | 0.9979 | 1          | 0.9979 | 0 | 0 | 0 | 1      | Ref |
| HM753684 | Unassigned | Unassigned | Unassigned | 303_0   | Clustered           | 155 VC_303_0 | 155 | 0.9979 | 1          | 0.9979 | 0 | 0 | 0 | 1      | Ref |
| HM753685 | Unassigned | Unassigned | Unassigned | 303_0   | Clustered           | 155 VC_303_0 | 155 | 0.9979 | 1          | 0.9979 | 0 | 0 | 0 | 1      | Ref |
| HM753686 | Unassigned | Unassigned | Unassigned | 303_0   | Clustered           | 155 VC_303_0 | 155 | 0.9979 | 1          | 0.9979 | 0 | 0 | 0 | 1      | Ref |
| HM753687 | Unassigned | Unassigned | Unassigned | 303_0   | Clustered           | 155 VC_303_0 | 155 | 0.9979 | 1          | 0.9979 | 0 | 0 | 0 | 1      | Ref |
| HM753688 | Unassigned | Unassigned | Unassigned | 303_0   | Clustered           | 155 VC_303_0 | 155 | 0.9979 | 1          | 0.9979 | 0 | 0 | 0 | 1      | Ref |
| HM753689 | Unassigned | Unassigned | Unassigned | 303_0   | Clustered           | 155 VC_303_0 | 155 | 0.9979 | 1          | 0.9979 | 0 | 0 | 0 | 1      | Ref |
| HM753690 | Unassigned | Unassigned | Unassigned | 303_0   | Clustered           | 155 VC_303_0 | 155 | 0.9979 | 1          | 0.9979 | 0 | 0 | 0 | 1      | Ref |
| HM753691 | Unassigned | Unassigned | Unassigned | 303_0   | Clustered           | 155 VC_303_0 | 155 | 0.9979 | 1          | 0.9979 | 0 | 0 | 0 | 1      | Ref |
| HM753692 | Unassigned | Unassigned | Unassigned | 303_0   | Clustered           | 155 VC_303_0 | 155 | 0.9979 | 1          | 0.9979 | 0 | 0 | 0 | 1      | Ref |
| HM753693 | Unassigned | Unassigned | Unassigned | 303_0   | Clustered           | 155 VC_303_0 | 155 | 0.9979 | 1          | 0.9979 | 0 | 0 | 0 | 1      | Ref |



|           |            |            |            |        |                     |              |     |        |            |        |   |   |   |            |
|-----------|------------|------------|------------|--------|---------------------|--------------|-----|--------|------------|--------|---|---|---|------------|
| HM753694  | Unassigned | Unassigned | Unassigned | 303_0  | Clustered           | 155 VC_303_0 | 155 | 0.9979 | 1          | 0.9979 | 0 | 0 | 0 | 1 Ref      |
| HM753695  | Unassigned | Unassigned | Unassigned | 303_0  | Clustered           | 155 VC_303_0 | 155 | 0.9979 | 1          | 0.9979 | 0 | 0 | 0 | 1 Ref      |
| HM753696  | Unassigned | Unassigned | Unassigned | 303_0  | Clustered           | 155 VC_303_0 | 155 | 0.9979 | 1          | 0.9979 | 0 | 0 | 0 | 1 Ref      |
| HM753697  | Unassigned | Unassigned | Unassigned | 303_0  | Clustered           | 155 VC_303_0 | 155 | 0.9979 | 1          | 0.9979 | 0 | 0 | 0 | 1 Ref      |
| HM753698  | Unassigned | Unassigned | Unassigned | 303_0  | Clustered           | 155 VC_303_0 | 155 | 0.9979 | 1          | 0.9979 | 0 | 0 | 0 | 1 Ref      |
| HM753699  | Unassigned | Unassigned | Unassigned | 303_0  | Clustered           | 155 VC_303_0 | 155 | 0.9979 | 1          | 0.9979 | 0 | 0 | 0 | 1 Ref      |
| HM753700  | Unassigned | Unassigned | Unassigned | 303_0  | Clustered           | 155 VC_303_0 | 155 | 0.9979 | 1          | 0.9979 | 0 | 0 | 0 | 1 Ref      |
| HM753701  | Unassigned | Unassigned | Unassigned | 303_0  | Clustered           | 155 VC_303_0 | 155 | 0.9979 | 1          | 0.9979 | 0 | 0 | 0 | 1 Ref      |
| HM753702  | Unassigned | Unassigned | Unassigned | 303_0  | Clustered           | 155 VC_303_0 | 155 | 0.9979 | 1          | 0.9979 | 0 | 0 | 0 | 1 Ref      |
| HM753703  | Unassigned | Unassigned | Unassigned | 303_0  | Clustered           | 155 VC_303_0 | 155 | 0.9979 | 1          | 0.9979 | 0 | 0 | 0 | 1 Ref      |
| HM753704  | Unassigned | Unassigned | Unassigned | 303_0  | Clustered           | 155 VC_303_0 | 155 | 0.9979 | 1          | 0.9979 | 0 | 0 | 0 | 1 Ref      |
| HM753705  | Unassigned | Unassigned | Unassigned | 303_0  | Clustered           | 155 VC_303_0 | 155 | 0.9979 | 1          | 0.9979 | 0 | 0 | 0 | 1 Ref      |
| HM753706  | Unassigned | Unassigned | Unassigned | 303_0  | Clustered           | 155 VC_303_0 | 155 | 0.9979 | 1          | 0.9979 | 0 | 0 | 0 | 1 Ref      |
| HM753707  | Unassigned | Unassigned | Unassigned | 303_0  | Clustered           | 155 VC_303_0 | 155 | 0.9979 | 1          | 0.9979 | 0 | 0 | 0 | 1 Ref      |
| HM753708  | Unassigned | Unassigned | Unassigned | 303_0  | Clustered           | 155 VC_303_0 | 155 | 0.9979 | 1          | 0.9979 | 0 | 0 | 0 | 1 Ref      |
| HM753709  | Unassigned | Unassigned | Unassigned | 303_0  | Clustered           | 155 VC_303_0 | 155 | 0.9979 | 1          | 0.9979 | 0 | 0 | 0 | 1 Ref      |
| HM753710  | Unassigned | Unassigned | Unassigned | 303_0  | Clustered           | 155 VC_303_0 | 155 | 0.9979 | 1          | 0.9979 | 0 | 0 | 0 | 1 Ref      |
| HM753711  | Unassigned | Unassigned | Unassigned | 303_0  | Clustered           | 155 VC_303_0 | 155 | 0.9979 | 1          | 0.9979 | 0 | 0 | 0 | 1 Ref      |
| HM753712  | Unassigned | Unassigned | Unassigned | 303_0  | Clustered           | 155 VC_303_0 | 155 | 0.9979 | 1          | 0.9979 | 0 | 0 | 0 | 1 Ref      |
| HM753713  | Unassigned | Unassigned | Unassigned | 303_0  | Clustered           | 155 VC_303_0 | 155 | 0.9979 | 1          | 0.9979 | 0 | 0 | 0 | 1 Ref      |
| HM753714  | Unassigned | Unassigned | Unassigned | 303_0  | Clustered           | 155 VC_303_0 | 155 | 0.9979 | 1          | 0.9979 | 0 | 0 | 0 | 1 Ref      |
| HM753715  | Unassigned | Unassigned | Unassigned | 303_0  | Clustered           | 155 VC_303_0 | 155 | 0.9979 | 1          | 0.9979 | 0 | 0 | 0 | 1 Ref      |
| HM753716  | Unassigned | Unassigned | Unassigned | 303_0  | Clustered           | 155 VC_303_0 | 155 | 0.9979 | 1          | 0.9979 | 0 | 0 | 0 | 1 Ref      |
| HM753717  | Unassigned | Unassigned | Unassigned | 303_0  | Clustered           | 155 VC_303_0 | 155 | 0.9979 | 1          | 0.9979 | 0 | 0 | 0 | 1 Ref      |
| HM753718  | Unassigned | Unassigned | Unassigned | 303_0  | Clustered           | 155 VC_303_0 | 155 | 0.9979 | 1          | 0.9979 | 0 | 0 | 0 | 1 Ref      |
| HM755814  | Unassigned | Unassigned | Unassigned | 514_0  | Clustered           | 75 VC_514_0  | 75  | 0.9402 | 1          | 0.9402 | 0 | 0 | 0 | 1 Ref      |
| HM770079  | Unassigned | Unassigned | Unassigned | 6_0    | Clustered           | 44 VC_6_0    | 44  | 0.908  | 1          | 0.908  | 0 | 0 | 0 | 1 Ref      |
| HM775306  | Unassigned | Unassigned | Unassigned | 303_0  | Clustered           | 155 VC_303_0 | 155 | 0.9979 | 1          | 0.9979 | 0 | 0 | 0 | 1 Ref      |
| HM775307  | Unassigned | Unassigned | Unassigned | 303_0  | Clustered           | 155 VC_303_0 | 155 | 0.9979 | 1          | 0.9979 | 0 | 0 | 0 | 1 Ref      |
| HM775308  | Unassigned | Unassigned | Unassigned | 303_0  | Clustered           | 155 VC_303_0 | 155 | 0.9979 | 1          | 0.9979 | 0 | 0 | 0 | 1 Ref      |
| HM775309  | Unassigned | Unassigned | Unassigned | 303_0  | Clustered           | 155 VC_303_0 | 155 | 0.9979 | 1          | 0.9979 | 0 | 0 | 0 | 1 Ref      |
| HM775310  | Unassigned | Unassigned | Unassigned | 303_0  | Clustered           | 155 VC_303_0 | 155 | 0.9979 | 1          | 0.9979 | 0 | 0 | 0 | 1 Ref      |
| HM775311  | Unassigned | Unassigned | Unassigned | 303_0  | Clustered           | 155 VC_303_0 | 155 | 0.9979 | 1          | 0.9979 | 0 | 0 | 0 | 1 Ref      |
| HM997019  | Unassigned | Unassigned | Unassigned | 812_0  | Clustered           | 3 VC_812_0   | 3   | 0.1174 | 0.99842379 | 0.1172 | 0 | 0 | 0 | 1 Ref      |
| HM997020  | Unassigned | Unassigned | Unassigned | 283_2  | Clustered           | 2 VC_283_2   | 2   | 0.0027 | 0.93842619 | 0.0025 | 0 | 0 | 0 | 1 Ref      |
| HQ1 10083 | Unassigned | Unassigned | Unassigned | 5_0    | Clustered           | 30 VC_5_0    | 30  | 0.9647 | 1          | 0.9647 | 0 | 0 | 0 | 1 Ref      |
| HQ1 10084 | Unassigned | Unassigned | Unassigned | 228_0  | Clustered           | 60 VC_228_0  | 60  | 0.942  | 1          | 0.942  | 0 | 0 | 0 | 1 Ref      |
| HQ1 27381 | Unassigned | Unassigned | Unassigned | 9_0    | Clustered           | 38 VC_9_0    | 38  | 0.4895 | 1          | 0.4895 | 0 | 0 | 0 | 1 Ref      |
| HQ1 41410 | Unassigned | Unassigned | Unassigned | 381_0  | Clustered           | 2 VC_381_0   | 2   | 0.0829 | 0.95381392 | 0.079  | 0 | 0 | 0 | 1 Ref      |
| HQ1 41411 | Unassigned | Unassigned | Unassigned | 300_0  | Clustered           | 3 VC_300_0   | 3   | 0.1218 | 0.99841701 | 0.1216 | 0 | 0 | 0 | 0.6667 Ref |
| HQ1 63896 | Unassigned | Unassigned | Unassigned | 149_8  | Clustered           | 66 VC_149_8  | 66  | 0.4565 | 1          | 0.4565 | 0 | 0 | 0 | 0.8182 Ref |
| HQ1 86308 | Unassigned | Unassigned | Unassigned | 699_0  | Clustered           | 71 VC_699_0  | 71  | 0.9352 | 1          | 0.9352 | 0 | 0 | 0 | 1 Ref      |
| HQ201307  | Unassigned | Unassigned | Unassigned | 33_0   | Clustered           | 4 VC_33_0    | 4   | 0.06   | 0.99994826 | 0.06   | 0 | 0 | 0 | 1 Ref      |
| HQ201308  | Unassigned | Unassigned | Unassigned | 31_2   | Clustered/Singleton | 1 VC_31_2    | 1   | 0      | 1          | 0      | 0 | 0 | 0 | 1 Ref      |
| HQ224500  | Unassigned | Unassigned | Unassigned | 875_0  | Clustered           | 10 VC_875_0  | 10  | 0.988  | 0.99948433 | 0.9875 | 0 | 0 | 0 | 1 Ref      |
| HQ259103  | Unassigned | Unassigned | Unassigned | 133_31 | Clustered           | 6 VC_133_31  | 6   | 0.0263 | 0.99999694 | 0.0263 | 0 | 0 | 0 | 1 Ref      |
| HQ259105  | Unassigned | Unassigned | Unassigned | 779_0  | Clustered           | 37 VC_779_0  | 37  | 0.5682 | 1          | 0.5682 | 0 | 0 | 0 | 1 Ref      |
| HQ268735  | Unassigned | Unassigned | Unassigned | 891_0  | Clustered           | 2 VC_891_0   | 2   | 0.5746 | 0.92263554 | 0.5301 | 0 | 0 | 0 | 1 Ref      |
| HQ316579  | Unassigned | Unassigned | Unassigned | 493_14 | Clustered/Singleton | 1 VC_493_14  | 1   | 0      | 1          | 0      | 0 | 0 | 0 | 1 Ref      |
| HQ316581  | Unassigned | Unassigned | Unassigned | 248_0  | Clustered           | 11 VC_248_0  | 11  | 0.7031 | 1          | 0.7031 | 0 | 0 | 0 | 1 Ref      |
| HQ316582  | Unassigned | Unassigned | Unassigned | 902_0  | Clustered           | 3 VC_902_0   | 3   | 0.9978 | 0.87589346 | 0.8739 | 0 | 0 | 0 | 1 Ref      |
| HQ316583  | Unassigned | Unassigned | Unassigned | 656_0  | Clustered           | 2 VC_656_0   | 2   | 0.0089 | 0.92256518 | 0.0082 | 0 | 0 | 0 | 1 Ref      |
| HQ316584  | Unassigned | Unassigned | Unassigned | 340_0  | Clustered           | 31 VC_340_0  | 31  | 0.9549 | 1          | 0.9549 | 0 | 0 | 0 | 1 Ref      |
| HQ316603  | Unassigned | Unassigned | Unassigned | 656_0  | Clustered           | 2 VC_656_0   | 2   | 0.0089 | 0.92256518 | 0.0082 | 0 | 0 | 0 | 1 Ref      |
| HQ316604  | Unassigned | Unassigned | Unassigned | 904_1  | Clustered           | 4 VC_904_1   | 4   | 0.1486 | 0.99997723 | 0.1486 | 0 | 0 | 0 | 1 Ref      |
| HQ317290  | Unassigned | Unassigned | Unassigned | 662_0  | Clustered           | 62 VC_662_0  | 62  | 0.6976 | 1          | 0.6976 | 0 | 0 | 0 | 1 Ref      |
| HQ317291  | Unassigned | Unassigned | Unassigned | 662_0  | Clustered           | 62 VC_662_0  | 62  | 0.6976 | 1          | 0.6976 | 0 | 0 | 0 | 1 Ref      |
| HQ317292  | Unassigned | Unassigned | Unassigned | 662_0  | Clustered           | 62 VC_662_0  | 62  | 0.6976 | 1          | 0.6976 | 0 | 0 | 0 | 1 Ref      |
| HQ317384  | Unassigned | Unassigned | Unassigned | 907_0  | Clustered           | 3 VC_907_0   | 3   | 0.6642 | 0.99633114 | 0.6618 | 0 | 0 | 0 | 1 Ref      |
| HQ317386  | Unassigned | Unassigned | Unassigned | 909_0  | Clustered           | 5 VC_909_0   | 5   | 0.7406 | 0.99999861 | 0.7406 | 0 | 0 | 0 | 1 Ref      |
| HQ317387  | Unassigned | Unassigned | Unassigned | 833_0  | Clustered           | 16 VC_833_0  | 16  | 0.9351 | 1          | 0.9351 | 0 | 0 | 0 | 1 Ref      |
| HQ317388  | Unassigned | Unassigned | Unassigned | 340_0  | Clustered           | 31 VC_340_0  | 31  | 0.9549 | 1          | 0.9549 | 0 | 0 | 0 | 1 Ref      |
| HQ317389  | Unassigned | Unassigned | Unassigned | 340_0  | Clustered           | 31 VC_340_0  | 31  | 0.9549 | 1          | 0.9549 | 0 | 0 | 0 | 1 Ref      |
| HQ317390  | Unassigned | Unassigned | Unassigned | 910_0  | Clustered           | 2 VC_910_0   | 2   | 0.9891 | 0.5        | 0.4946 | 0 | 0 | 0 | 1 Ref      |
| HQ317391  | Unassigned | Unassigned | Unassigned | 432_10 | Clustered           | 2 VC_432_10  | 2   | 0.0216 | 0.95771017 | 0.0207 | 0 | 0 | 0 | 1 Ref      |
| HQ317392  | Unassigned | Unassigned | Unassigned | 911_0  | Clustered           | 6 VC_911_0   | 6   | 0.2787 | 1          | 0.2787 | 0 | 0 | 0 | 1 Ref      |
| HQ317393  | Unassigned | Unassigned | Unassigned | 531_2  | Clustered/Singleton | 1 VC_531_2   | 1   | 0      | 1          | 0      | 0 | 0 | 0 | 1 Ref      |
| HQ332136  | Unassigned | Unassigned | Unassigned | 913_0  | Clustered           | 2 VC_913_0   | 2   | 0.1042 | 0.82306775 | 0.0858 | 0 | 0 | 0 | 1 Ref      |
| HQ332137  | Unassigned | Unassigned | Unassigned | 340_0  | Clustered           | 31 VC_340_0  | 31  | 0.9549 | 1          | 0.9549 | 0 | 0 | 0 | 1 Ref      |
| HQ332138  | Unassigned | Unassigned | Unassigned | 734_0  | Clustered           | 6 VC_734_0   | 6   | 0.1914 | 0.99996888 | 0.1914 | 0 | 0 | 0 | 1 Ref      |
| HQ332140  | Unassigned | Unassigned | Unassigned | 340_0  | Clustered           | 31 VC_340_0  | 31  | 0.9549 | 1          | 0.9549 | 0 | 0 | 0 | 1 Ref      |
| HQ332141  | Unassigned | Unassigned | Unassigned | 351_0  | Clustered           | 3 VC_351_0   | 3   | 0.8899 | 0.98155579 | 0.8735 | 0 | 0 | 0 | 1 Ref      |
| HQ332142  | Unassigned | Unassigned | Unassigned | 907_0  | Clustered           | 3 VC_907_0   | 3   | 0.6642 | 0.99633114 | 0.6618 | 0 | 0 | 0 | 1 Ref      |
| HQ333270  | Unassigned | Unassigned | Unassigned | 386_0  | Clustered           | 49 VC_386_0  | 49  | 0.7941 | 1          | 0.7941 | 0 | 0 | 0 | 1 Ref      |
| HQ337021  | Unassigned | Unassigned | Unassigned | 655_2  | Clustered           | 3 VC_655_2   | 3   | 0.0231 | 0.99860756 | 0.0231 | 0 | 0 | 0 | 1 Ref      |
| HQ337022  | Unassigned | Unassigned | Unassigned | 340_0  | Clustered           | 31 VC_340_0  | 31  | 0.9549 | 1          | 0.9549 | 0 | 0 | 0 | 1 Ref      |
| HQ377372  | Unassigned | Unassigned | Unassigned | 730_0  | Clustered           | 9 VC_730_0   | 9   | 1      | 1          | 1      | 0 | 0 | 0 | 1 Ref      |
| HQ377373  | Unassigned | Unassigned | Unassigned | 730_0  | Clustered           | 9 VC_730_0   | 9   | 1      | 1          | 1      | 0 | 0 | 0 | 1 Ref      |
| HQ396194  | Unassigned | Unassigned | Unassigned | 916_0  | Clustered           | 4 VC_916_0   | 4   | 0.8472 | 0.99985574 | 0.8471 | 0 | 0 | 0 | 1 Ref      |
| HQ403646  | Unassigned | Unassigned | Unassigned | 919_0  | Clustered           | 39 VC_919_0  | 39  | 0.9069 | 1          | 0.9069 | 0 | 0 | 0 | 1 Ref      |
| HQ406778  | Unassigned | Unassigned | Unassigned | 190_23 | Clustered           | 10 VC_190_23 | 10  | 0.0704 | 1          | 0.0704 | 0 | 0 | 0 | 0.8444 Ref |



|          |            |            |            |        |                     |              |    |        |            |        |   |   |   |        |     |
|----------|------------|------------|------------|--------|---------------------|--------------|----|--------|------------|--------|---|---|---|--------|-----|
| HQ424691 | Unassigned | Unassigned | Unassigned | 42_0   | Clustered           | 49 VC_42_0   | 49 | 0.4517 | 1          | 0.4517 | 0 | 0 | 0 | 0.8597 | Ref |
| HQ630627 | Unassigned | Unassigned | Unassigned | 344_6  | Clustered/Singleton | 1 VC_344_6   | 1  | 0      | 1          | 0      | 0 | 0 | 0 | 1      | Ref |
| HQ632825 | Unassigned | Unassigned | Unassigned | 432_9  | Clustered           | 3 VC_432_9   | 3  | 0.0372 | 0.99851312 | 0.0371 | 0 | 0 | 0 | 1      | Ref |
| HQ632857 | Unassigned | Unassigned | Unassigned | 921_0  | Clustered           | 2 VC_921_0   | 2  | 0.948  | 0.72985431 | 0.6919 | 0 | 0 | 0 | 1      | Ref |
| HQ632858 | Unassigned | Unassigned | Unassigned | 921_0  | Clustered           | 2 VC_921_0   | 2  | 0.948  | 0.72985431 | 0.6919 | 0 | 0 | 0 | 1      | Ref |
| HQ632859 | Unassigned | Unassigned | Unassigned | 598_0  | Clustered           | 4 VC_598_0   | 4  | 0.0597 | 0.99355358 | 0.0593 | 0 | 0 | 0 | 1      | Ref |
| HQ632860 | Unassigned | Unassigned | Unassigned | 642_0  | Clustered           | 7 VC_642_0   | 7  | 0.1508 | 1          | 0.1508 | 0 | 0 | 0 | 0.7619 | Ref |
| HQ633062 | Unassigned | Unassigned | Unassigned | 340_0  | Clustered           | 31 VC_340_0  | 31 | 0.9549 | 1          | 0.9549 | 0 | 0 | 0 | 1      | Ref |
| HQ633071 | Unassigned | Unassigned | Unassigned | 432_11 | Clustered/Singleton | 1 VC_432_11  | 1  | 0      | 1          | 0      | 0 | 0 | 0 | 1      | Ref |
| HQ634152 | Unassigned | Unassigned | Unassigned | 340_0  | Clustered           | 31 VC_340_0  | 31 | 0.9549 | 1          | 0.9549 | 0 | 0 | 0 | 1      | Ref |
| HQ634156 | Unassigned | Unassigned | Unassigned | 493_10 | Clustered/Singleton | 1 VC_493_10  | 1  | 0      | 1          | 0      | 0 | 0 | 0 | 1      | Ref |
| HQ634157 | Unassigned | Unassigned | Unassigned | 493_7  | Clustered/Singleton | 1 VC_493_7   | 1  | 0      | 1          | 0      | 0 | 0 | 0 | 1      | Ref |
| HQ634175 | Unassigned | Unassigned | Unassigned | 655_3  | Clustered/Singleton | 1 VC_655_3   | 1  | 0      | 1          | 0      | 0 | 0 | 0 | 1      | Ref |
| HQ634176 | Unassigned | Unassigned | Unassigned | 655_2  | Clustered           | 3 VC_655_2   | 3  | 0.0231 | 0.99860756 | 0.0231 | 0 | 0 | 0 | 1      | Ref |
| HQ634177 | Unassigned | Unassigned | Unassigned | 433_0  | Clustered           | 6 VC_433_0   | 6  | 0.0787 | 1          | 0.0787 | 0 | 0 | 0 | 1      | Ref |
| HQ634187 | Unassigned | Unassigned | Unassigned | 356_0  | Clustered           | 2 VC_356_0   | 2  | 0.1992 | 0.93211095 | 0.1857 | 0 | 0 | 0 | 1      | Ref |
| HQ634188 | Unassigned | Unassigned | Unassigned | 340_0  | Clustered           | 31 VC_340_0  | 31 | 0.9549 | 1          | 0.9549 | 0 | 0 | 0 | 1      | Ref |
| HQ634189 | Unassigned | Unassigned | Unassigned | 655_7  | Clustered           | 3 VC_655_7   | 3  | 0.0166 | 0.99856978 | 0.0166 | 0 | 0 | 0 | 1      | Ref |
| HQ634190 | Unassigned | Unassigned | Unassigned | 655_6  | Clustered           | 2 VC_655_6   | 2  | 0.0078 | 0.95775168 | 0.0075 | 0 | 0 | 0 | 1      | Ref |
| HQ634192 | Unassigned | Unassigned | Unassigned | 929_0  | Clustered           | 4 VC_929_0   | 4  | 0.846  | 0.99722201 | 0.8437 | 0 | 0 | 0 | 1      | Ref |
| HQ634195 | Unassigned | Unassigned | Unassigned | 493_15 | Clustered/Singleton | 1 VC_493_15  | 1  | 0      | 1          | 0      | 0 | 0 | 0 | 1      | Ref |
| HQ641340 | Unassigned | Unassigned | Unassigned | 82_0   | Clustered           | 24 VC_82_0   | 24 | 0.7351 | 1          | 0.7351 | 0 | 0 | 0 | 1      | Ref |
| HQ641341 | Unassigned | Unassigned | Unassigned | 82_0   | Clustered           | 24 VC_82_0   | 24 | 0.7351 | 1          | 0.7351 | 0 | 0 | 0 | 1      | Ref |
| HQ641342 | Unassigned | Unassigned | Unassigned | 82_0   | Clustered           | 24 VC_82_0   | 24 | 0.7351 | 1          | 0.7351 | 0 | 0 | 0 | 1      | Ref |
| HQ641343 | Unassigned | Unassigned | Unassigned | 82_0   | Clustered           | 24 VC_82_0   | 24 | 0.7351 | 1          | 0.7351 | 0 | 0 | 0 | 1      | Ref |
| HQ641344 | Unassigned | Unassigned | Unassigned | 82_0   | Clustered           | 24 VC_82_0   | 24 | 0.7351 | 1          | 0.7351 | 0 | 0 | 0 | 1      | Ref |
| HQ641345 | Unassigned | Unassigned | Unassigned | 754_0  | Clustered           | 8 VC_754_0   | 8  | 0.752  | 1          | 0.752  | 0 | 0 | 0 | 1      | Ref |
| HQ641346 | Unassigned | Unassigned | Unassigned | 754_0  | Clustered           | 8 VC_754_0   | 8  | 0.752  | 1          | 0.752  | 0 | 0 | 0 | 1      | Ref |
| HQ641347 | Unassigned | Unassigned | Unassigned | 495_1  | Clustered           | 41 VC_495_1  | 41 | 0.328  | 1          | 0.328  | 0 | 0 | 0 | 0.911  | Ref |
| HQ641348 | Unassigned | Unassigned | Unassigned | 495_1  | Clustered           | 41 VC_495_1  | 41 | 0.328  | 1          | 0.328  | 0 | 0 | 0 | 0.911  | Ref |
| HQ641349 | Unassigned | Unassigned | Unassigned | 495_1  | Clustered           | 41 VC_495_1  | 41 | 0.328  | 1          | 0.328  | 0 | 0 | 0 | 0.911  | Ref |
| HQ641350 | Unassigned | Unassigned | Unassigned | 495_1  | Clustered           | 41 VC_495_1  | 41 | 0.328  | 1          | 0.328  | 0 | 0 | 0 | 0.911  | Ref |
| HQ641351 | Unassigned | Unassigned | Unassigned | 495_1  | Clustered           | 41 VC_495_1  | 41 | 0.328  | 1          | 0.328  | 0 | 0 | 0 | 0.911  | Ref |
| HQ641352 | Unassigned | Unassigned | Unassigned | 495_1  | Clustered           | 41 VC_495_1  | 41 | 0.328  | 1          | 0.328  | 0 | 0 | 0 | 0.911  | Ref |
| HQ641353 | Unassigned | Unassigned | Unassigned | 495_1  | Clustered           | 41 VC_495_1  | 41 | 0.328  | 1          | 0.328  | 0 | 0 | 0 | 0.911  | Ref |
| HQ641354 | Unassigned | Unassigned | Unassigned | 495_1  | Clustered           | 41 VC_495_1  | 41 | 0.328  | 1          | 0.328  | 0 | 0 | 0 | 0.911  | Ref |
| HQ65011  | Unassigned | Unassigned | Unassigned | 190_24 | Clustered           | 5 VC_190_24  | 5  | 0.0293 | 0.9999996  | 0.0293 | 0 | 0 | 0 | 0.7    | Ref |
| HQ683709 | Unassigned | Unassigned | Unassigned | 932_0  | Clustered           | 2 VC_932_0   | 2  | 0.4438 | 0.89435023 | 0.3969 | 0 | 0 | 0 | 1      | Ref |
| HQ698895 | Unassigned | Unassigned | Unassigned | 927_0  | Clustered           | 2 VC_927_0   | 2  | 0.0876 | 0.71936208 | 0.063  | 0 | 0 | 0 | 1      | Ref |
| HQ698922 | Unassigned | Unassigned | Unassigned | 492_0  | Clustered           | 2 VC_492_0   | 2  | 0.0158 | 0.6640397  | 0.0105 | 0 | 0 | 0 | 1      | Ref |
| HQ711984 | Unassigned | Unassigned | Unassigned | 297_1  | Clustered           | 20 VC_297_1  | 20 | 0.5653 | 1          | 0.5653 | 0 | 0 | 0 | 0.7684 | Ref |
| HQ711985 | Unassigned | Unassigned | Unassigned | 176_0  | Clustered           | 2 VC_176_0   | 2  | 0.0498 | 0.95663741 | 0.0476 | 0 | 0 | 0 | 1      | Ref |
| HQ728263 | Unassigned | Unassigned | Unassigned | 328_0  | Clustered           | 11 VC_328_0  | 11 | 0.4707 | 1          | 0.4707 | 0 | 0 | 0 | 1      | Ref |
| HQ728264 | Unassigned | Unassigned | Unassigned | 792_0  | Clustered           | 35 VC_792_0  | 35 | 0.9828 | 1          | 0.9828 | 0 | 0 | 0 | 1      | Ref |
| HQ728265 | Unassigned | Unassigned | Unassigned | 387_0  | Clustered           | 3 VC_387_0   | 3  | 0.0424 | 0.99861589 | 0.0423 | 0 | 0 | 0 | 1      | Ref |
| HQ728524 | Unassigned | Unassigned | Unassigned | 520_26 | Clustered           | 3 VC_520_26  | 3  | 0.026  | 0.99859898 | 0.026  | 0 | 0 | 0 | 1      | Ref |
| HQ829472 | Unassigned | Unassigned | Unassigned | 290_5  | Clustered           | 14 VC_290_5  | 14 | 0.1422 | 1          | 0.1422 | 0 | 0 | 0 | 0.9231 | Ref |
| HQ832595 | Unassigned | Unassigned | Unassigned | 76_0   | Clustered           | 37 VC_76_0   | 37 | 0.9403 | 1          | 0.9403 | 0 | 0 | 0 | 1      | Ref |
| HQ906662 | Unassigned | Unassigned | Unassigned | 22_0   | Clustered           | 11 VC_22_0   | 11 | 0.5163 | 1          | 0.5163 | 0 | 0 | 0 | 1      | Ref |
| HQ906663 | Unassigned | Unassigned | Unassigned | 22_0   | Clustered           | 11 VC_22_0   | 11 | 0.5163 | 1          | 0.5163 | 0 | 0 | 0 | 1      | Ref |
| HQ906664 | Unassigned | Unassigned | Unassigned | 22_0   | Clustered           | 11 VC_22_0   | 11 | 0.5163 | 1          | 0.5163 | 0 | 0 | 0 | 1      | Ref |
| HQ918180 | Unassigned | Unassigned | Unassigned | 668_0  | Clustered           | 25 VC_668_0  | 25 | 0.5539 | 1          | 0.5539 | 0 | 0 | 0 | 0.96   | Ref |
| JF412296 | Unassigned | Unassigned | Unassigned | 613_0  | Clustered           | 2 VC_613_0   | 2  | 0.0357 | 0.94194318 | 0.0336 | 0 | 0 | 0 | 1      | Ref |
| JF461087 | Unassigned | Unassigned | Unassigned | 329_1  | Clustered           | 17 VC_329_1  | 17 | 0.0867 | 1          | 0.0867 | 0 | 0 | 0 | 0.8235 | Ref |
| JF501022 | Unassigned | Unassigned | Unassigned | 938_0  | Clustered           | 99 VC_938_0  | 99 | 0.9119 | 1          | 0.9119 | 0 | 0 | 0 | 0.9928 | Ref |
| JF704091 | Unassigned | Unassigned | Unassigned | 371_18 | Clustered           | 10 VC_371_18 | 10 | 0.0302 | 1          | 0.0302 | 0 | 0 | 0 | 0.8    | Ref |
| JF704092 | Unassigned | Unassigned | Unassigned | 558_22 | Clustered           | 4 VC_558_22  | 4  | 0.01   | 0.99312819 | 0.0099 | 0 | 0 | 0 | 0.8333 | Ref |
| JF704093 | Unassigned | Unassigned | Unassigned | 517_0  | Clustered           | 18 VC_517_0  | 18 | 0.1599 | 1          | 0.1599 | 0 | 0 | 0 | 1      | Ref |
| JF704094 | Unassigned | Unassigned | Unassigned | 372_0  | Clustered           | 24 VC_372_0  | 24 | 0.5539 | 1          | 0.5539 | 0 | 0 | 0 | 1      | Ref |
| JF704095 | Unassigned | Unassigned | Unassigned | 509_0  | Clustered           | 37 VC_509_0  | 37 | 0.9689 | 1          | 0.9689 | 0 | 0 | 0 | 1      | Ref |
| JF704096 | Unassigned | Unassigned | Unassigned | 558_20 | Clustered           | 17 VC_558_20 | 17 | 0.054  | 1          | 0.054  | 0 | 0 | 0 | 0.9926 | Ref |
| JF704097 | Unassigned | Unassigned | Unassigned | 223_0  | Clustered           | 38 VC_223_0  | 38 | 0.9095 | 1          | 0.9095 | 0 | 0 | 0 | 1      | Ref |
| JF704098 | Unassigned | Unassigned | Unassigned | 514_0  | Clustered           | 75 VC_514_0  | 75 | 0.9402 | 1          | 0.9402 | 0 | 0 | 0 | 1      | Ref |
| JF704099 | Unassigned | Unassigned | Unassigned | 371_3  | Clustered           | 22 VC_371_3  | 22 | 0.0787 | 1          | 0.0787 | 0 | 0 | 0 | 0.9048 | Ref |
| JF704100 | Unassigned | Unassigned | Unassigned | 939_0  | Clustered           | 15 VC_939_0  | 15 | 1      | 0          | 0      | 0 | 0 | 0 | 1      | Ref |
| JF704101 | Unassigned | Unassigned | Unassigned | 514_0  | Clustered           | 75 VC_514_0  | 75 | 0.9402 | 1          | 0.9402 | 0 | 0 | 0 | 1      | Ref |
| JF704102 | Unassigned | Unassigned | Unassigned | 371_16 | Clustered           | 42 VC_371_16 | 42 | 0.1341 | 1          | 0.1341 | 0 | 0 | 0 | 0.7282 | Ref |
| JF704103 | Unassigned | Unassigned | Unassigned | 371_15 | Clustered           | 44 VC_371_15 | 44 | 0.1391 | 1          | 0.1391 | 0 | 0 | 0 | 0.7474 | Ref |
| JF704104 | Unassigned | Unassigned | Unassigned | 372_0  | Clustered           | 24 VC_372_0  | 24 | 0.5539 | 1          | 0.5539 | 0 | 0 | 0 | 1      | Ref |
| JF704105 | Unassigned | Unassigned | Unassigned | 236_0  | Clustered           | 72 VC_236_0  | 72 | 0.8104 | 1          | 0.8104 | 0 | 0 | 0 | 1      | Ref |
| JF704106 | Unassigned | Unassigned | Unassigned | 236_0  | Clustered           | 72 VC_236_0  | 72 | 0.8104 | 1          | 0.8104 | 0 | 0 | 0 | 1      | Ref |
| JF704107 | Unassigned | Unassigned | Unassigned | 940_0  | Clustered           | 34 VC_940_0  | 34 | 0.7959 | 1          | 0.7959 | 0 | 0 | 0 | 1      | Ref |
| JF704108 | Unassigned | Unassigned | Unassigned | 887_0  | Clustered           | 18 VC_887_0  | 18 | 0.3663 | 1          | 0.3663 | 0 | 0 | 0 | 1      | Ref |
| JF704109 | Unassigned | Unassigned | Unassigned | 371_15 | Clustered           | 44 VC_371_15 | 44 | 0.1391 | 1          | 0.1391 | 0 | 0 | 0 | 0.7474 | Ref |
| JF704110 | Unassigned | Unassigned | Unassigned | 225_0  | Clustered           | 32 VC_225_0  | 32 | 0.848  | 1          | 0.848  | 0 | 0 | 0 | 0.996  | Ref |
| JF704111 | Unassigned | Unassigned | Unassigned | 513_0  | Clustered           | 32 VC_513_0  | 32 | 0.6881 | 1          | 0.6881 | 0 | 0 | 0 | 1      | Ref |
| JF704112 | Unassigned | Unassigned | Unassigned | 568_0  | Clustered           | 8 VC_568_0   | 8  | 0.5738 | 1          | 0.5738 | 0 | 0 | 0 | 1      | Ref |
| JF704113 | Unassigned | Unassigned | Unassigned | 887_0  | Clustered           | 18 VC_887_0  | 18 | 0.3663 | 1          | 0.3663 | 0 | 0 | 0 | 1      | Ref |
| JF704114 | Unassigned | Unassigned | Unassigned | 514_0  | Clustered           | 75 VC_514_0  | 75 | 0.9402 | 1          | 0.9402 | 0 | 0 | 0 | 1      | Ref |
| JF704116 | Unassigned | Unassigned | Unassigned | 558_6  | Clustered           | 2 VC_558_6   | 2  | 0.0032 | 0.73149279 | 0.0023 | 0 | 0 | 0 | 1      | Ref |
| JF704117 | Unassigned | Unassigned | Unassigned | 520_74 | Clustered           | 2 VC_520_74  | 2  | 0.0075 | 0.95760586 | 0.0072 | 0 | 0 | 0 | 1      | Ref |



|          |            |            |            |        |                     |              |     |        |            |        |   |   |   |            |
|----------|------------|------------|------------|--------|---------------------|--------------|-----|--------|------------|--------|---|---|---|------------|
| JF712866 | Unassigned | Unassigned | Unassigned | 607_0  | Clustered           | 16 VC_607_0  | 16  | 0.9179 | 1          | 0.9179 | 0 | 0 | 0 | 1 Ref      |
| JF713456 | Unassigned | Unassigned | Unassigned | 904_0  | Clustered           | 6 VC_904_0   | 6   | 0.233  | 1          | 0.233  | 0 | 0 | 0 | 1 Ref      |
| JF719726 | Unassigned | Unassigned | Unassigned | 303_0  | Clustered           | 155 VC_303_0 | 155 | 0.9979 | 1          | 0.9979 | 0 | 0 | 0 | 1 Ref      |
| JF719727 | Unassigned | Unassigned | Unassigned | 303_0  | Clustered           | 155 VC_303_0 | 155 | 0.9979 | 1          | 0.9979 | 0 | 0 | 0 | 1 Ref      |
| JF719728 | Unassigned | Unassigned | Unassigned | 303_0  | Clustered           | 155 VC_303_0 | 155 | 0.9979 | 1          | 0.9979 | 0 | 0 | 0 | 1 Ref      |
| JF719729 | Unassigned | Unassigned | Unassigned | 360_0  | Clustered           | 358 VC_360_0 | 358 | 0.9615 | 1          | 0.9615 | 0 | 0 | 0 | 1 Ref      |
| JF719730 | Unassigned | Unassigned | Unassigned | 360_0  | Clustered           | 358 VC_360_0 | 358 | 0.9615 | 1          | 0.9615 | 0 | 0 | 0 | 1 Ref      |
| JF719731 | Unassigned | Unassigned | Unassigned | 360_0  | Clustered           | 358 VC_360_0 | 358 | 0.9615 | 1          | 0.9615 | 0 | 0 | 0 | 1 Ref      |
| JF719732 | Unassigned | Unassigned | Unassigned | 61_0   | Clustered           | 12 VC_61_0   | 12  | 0.7633 | 1          | 0.7633 | 0 | 0 | 0 | 1 Ref      |
| JF719733 | Unassigned | Unassigned | Unassigned | 61_0   | Clustered           | 12 VC_61_0   | 12  | 0.7633 | 1          | 0.7633 | 0 | 0 | 0 | 1 Ref      |
| JF719734 | Unassigned | Unassigned | Unassigned | 61_0   | Clustered           | 12 VC_61_0   | 12  | 0.7633 | 1          | 0.7633 | 0 | 0 | 0 | 1 Ref      |
| JF731128 | Unassigned | Unassigned | Unassigned | 108_0  | Clustered           | 33 VC_108_0  | 33  | 0.949  | 1          | 0.949  | 0 | 0 | 0 | 1 Ref      |
| JF734911 | Unassigned | Unassigned | Unassigned | 99_0   | Clustered           | 32 VC_99_0   | 32  | 0.8828 | 1          | 0.8828 | 0 | 0 | 0 | 1 Ref      |
| JF744988 | Unassigned | Unassigned | Unassigned | 888_0  | Clustered           | 28 VC_888_0  | 28  | 0.5497 | 1          | 0.5497 | 0 | 0 | 0 | 1 Ref      |
| JF767208 | Unassigned | Unassigned | Unassigned | 815_0  | Clustered           | 8 VC_815_0   | 8   | 0.9801 | 1          | 0.9801 | 0 | 0 | 0 | 1 Ref      |
| JF767209 | Unassigned | Unassigned | Unassigned | 815_0  | Clustered           | 8 VC_815_0   | 8   | 0.9801 | 1          | 0.9801 | 0 | 0 | 0 | 1 Ref      |
| JF767210 | Unassigned | Unassigned | Unassigned | 815_0  | Clustered           | 8 VC_815_0   | 8   | 0.9801 | 1          | 0.9801 | 0 | 0 | 0 | 1 Ref      |
| JF770475 | Unassigned | Unassigned | Unassigned | 455_0  | Clustered           | 18 VC_455_0  | 18  | 0.4598 | 1          | 0.4598 | 0 | 0 | 0 | 1 Ref      |
| JF773396 | Unassigned | Unassigned | Unassigned | 730_0  | Clustered           | 9 VC_730_0   | 9   | 1      | 1          | 1      | 0 | 0 | 0 | 1 Ref      |
| JF792674 | Unassigned | Unassigned | Unassigned | 517_1  | Clustered           | 108 VC_517_1 | 108 | 0.8483 | 1          | 0.8483 | 0 | 0 | 0 | 0.9955 Ref |
| JF832915 | Unassigned | Unassigned | Unassigned | 181_0  | Clustered           | 5 VC_181_0   | 5   | 0.1168 | 0.99999995 | 0.1168 | 0 | 0 | 0 | 1 Ref      |
| JP900176 | Unassigned | Unassigned | Unassigned | 28_1   | Clustered           | 53 VC_28_1   | 53  | 0.7164 | 1          | 0.7164 | 0 | 0 | 0 | 0.9325 Ref |
| JP917095 | Unassigned | Unassigned | Unassigned | 943_0  | Clustered           | 2 VC_943_0   | 2   | 1      | 1          | 1      | 0 | 0 | 0 | 1 Ref      |
| JP923796 | Unassigned | Unassigned | Unassigned | 767_0  | Clustered           | 34 VC_767_0  | 34  | 0.9173 | 1          | 0.9173 | 0 | 0 | 0 | 1 Ref      |
| JP923797 | Unassigned | Unassigned | Unassigned | 767_0  | Clustered           | 34 VC_767_0  | 34  | 0.9173 | 1          | 0.9173 | 0 | 0 | 0 | 1 Ref      |
| JP937090 | Unassigned | Unassigned | Unassigned | 546_7  | Clustered           | 4 VC_546_7   | 4   | 0.041  | 0.9963251  | 0.0408 | 0 | 0 | 0 | 1 Ref      |
| JP937091 | Unassigned | Unassigned | Unassigned | 551_0  | Clustered           | 16 VC_551_0  | 16  | 0.0915 | 1          | 0.0915 | 0 | 0 | 0 | 0.6667 Ref |
| JP937092 | Unassigned | Unassigned | Unassigned | 223_0  | Clustered           | 38 VC_223_0  | 38  | 0.9095 | 1          | 0.9095 | 0 | 0 | 0 | 1 Ref      |
| JP937093 | Unassigned | Unassigned | Unassigned | 520_31 | Clustered           | 11 VC_520_31 | 11  | 0.0897 | 1          | 0.0897 | 0 | 0 | 0 | 0.6 Ref    |
| JP937094 | Unassigned | Unassigned | Unassigned | 223_0  | Clustered           | 38 VC_223_0  | 38  | 0.9095 | 1          | 0.9095 | 0 | 0 | 0 | 1 Ref      |
| JP937095 | Unassigned | Unassigned | Unassigned | 371_17 | Clustered           | 3 VC_371_17  | 3   | 0.0076 | 0.99811676 | 0.0076 | 0 | 0 | 0 | 1 Ref      |
| JP937096 | Unassigned | Unassigned | Unassigned | 551_2  | Clustered           | 17 VC_551_2  | 17  | 0.0973 | 1          | 0.0973 | 0 | 0 | 0 | 0.9779 Ref |
| JP937097 | Unassigned | Unassigned | Unassigned | 371_15 | Clustered           | 44 VC_371_15 | 44  | 0.1391 | 1          | 0.1391 | 0 | 0 | 0 | 0.7474 Ref |
| JP937098 | Unassigned | Unassigned | Unassigned | 520_93 | Clustered           | 2 VC_520_93  | 2   | 0.0104 | 0.95762079 | 0.0099 | 0 | 0 | 0 | 1 Ref      |
| JP937099 | Unassigned | Unassigned | Unassigned | 325_2  | Clustered/Singleton | 1 VC_325_2   | 1   | 0      | 1          | 0      | 0 | 0 | 0 | 1 Ref      |
| JP937100 | Unassigned | Unassigned | Unassigned | 325_41 | Clustered           | 2 VC_325_41  | 2   | 0.0036 | 0.94071129 | 0.0034 | 0 | 0 | 0 | 1 Ref      |
| JP937101 | Unassigned | Unassigned | Unassigned | 546_11 | Clustered/Singleton | 1 VC_546_11  | 1   | 0      | 1          | 0      | 0 | 0 | 0 | 1 Ref      |
| JP937102 | Unassigned | Unassigned | Unassigned | 520_37 | Clustered/Singleton | 1 VC_520_37  | 1   | 0      | 1          | 0      | 0 | 0 | 0 | 1 Ref      |
| JP937103 | Unassigned | Unassigned | Unassigned | 325_23 | Clustered           | 17 VC_325_23 | 17  | 0.0716 | 1          | 0.0716 | 0 | 0 | 0 | 0.6397 Ref |
| JP937104 | Unassigned | Unassigned | Unassigned | 237_1  | Clustered           | 13 VC_237_1  | 13  | 0.1773 | 1          | 0.1773 | 0 | 0 | 0 | 0.7308 Ref |
| JP937105 | Unassigned | Unassigned | Unassigned | 763_2  | Clustered           | 7 VC_763_2   | 7   | 0.2612 | 1          | 0.2612 | 0 | 0 | 0 | 1 Ref      |
| JP937106 | Unassigned | Unassigned | Unassigned | 551_0  | Clustered           | 16 VC_551_0  | 16  | 0.0915 | 1          | 0.0915 | 0 | 0 | 0 | 0.6667 Ref |
| JP937107 | Unassigned | Unassigned | Unassigned | 565_0  | Clustered           | 20 VC_565_0  | 20  | 0.8398 | 1          | 0.8398 | 0 | 0 | 0 | 1 Ref      |
| JP937108 | Unassigned | Unassigned | Unassigned | 325_5  | Clustered           | 11 VC_325_5  | 11  | 0.047  | 1          | 0.047  | 0 | 0 | 0 | 0.7636 Ref |
| JP937109 | Unassigned | Unassigned | Unassigned | 371_18 | Clustered           | 10 VC_371_18 | 10  | 0.0302 | 1          | 0.0302 | 0 | 0 | 0 | 0.8 Ref    |
| JP937110 | Unassigned | Unassigned | Unassigned | 325_5  | Clustered           | 11 VC_325_5  | 11  | 0.047  | 1          | 0.047  | 0 | 0 | 0 | 0.7636 Ref |
| JP939047 | Unassigned | Unassigned | Unassigned | 749_0  | Clustered           | 40 VC_749_0  | 40  | 0.7517 | 1          | 0.7517 | 0 | 0 | 0 | 1 Ref      |
| JP946695 | Unassigned | Unassigned | Unassigned | 215_2  | Clustered           | 5 VC_215_2   | 5   | 0.0572 | 0.99999997 | 0.0572 | 0 | 0 | 0 | 1 Ref      |
| JP957056 | Unassigned | Unassigned | Unassigned | 371_15 | Clustered           | 44 VC_371_15 | 44  | 0.1391 | 1          | 0.1391 | 0 | 0 | 0 | 0.7474 Ref |
| JP957057 | Unassigned | Unassigned | Unassigned | 325_24 | Clustered           | 3 VC_325_24  | 3   | 0.009  | 0.99853949 | 0.009  | 0 | 0 | 0 | 1 Ref      |
| JP957058 | Unassigned | Unassigned | Unassigned | 513_0  | Clustered           | 32 VC_513_0  | 32  | 0.6881 | 1          | 0.6881 | 0 | 0 | 0 | 1 Ref      |
| JP957059 | Unassigned | Unassigned | Unassigned | 546_7  | Clustered           | 4 VC_546_7   | 4   | 0.041  | 0.9963251  | 0.0408 | 0 | 0 | 0 | 1 Ref      |
| JP957060 | Unassigned | Unassigned | Unassigned | 219_0  | Clustered           | 5 VC_219_0   | 5   | 0.08   | 0.99999998 | 0.08   | 0 | 0 | 0 | 1 Ref      |
| JP966203 | Unassigned | Unassigned | Unassigned | 883_0  | Clustered           | 10 VC_883_0  | 10  | 0.2015 | 1          | 0.2015 | 0 | 0 | 0 | 1 Ref      |
| JP974286 | Unassigned | Unassigned | Unassigned | 928_0  | Clustered           | 3 VC_928_0   | 3   | 0.7844 | 0.9944138  | 0.78   | 0 | 0 | 0 | 1 Ref      |
| JP974287 | Unassigned | Unassigned | Unassigned | 643_0  | Clustered           | 2 VC_643_0   | 2   | 0.1092 | 0.95085347 | 0.1038 | 0 | 0 | 0 | 1 Ref      |
| JP974294 | Unassigned | Unassigned | Unassigned | 460_0  | Clustered           | 19 VC_460_0  | 19  | 0.3744 | 1          | 0.3744 | 0 | 0 | 0 | 1 Ref      |
| JP974295 | Unassigned | Unassigned | Unassigned | 427_0  | Clustered           | 3 VC_427_0   | 3   | 0.0627 | 0.96830121 | 0.0608 | 0 | 0 | 0 | 1 Ref      |
| JP974307 | Unassigned | Unassigned | Unassigned | 182_0  | Clustered           | 5 VC_182_0   | 5   | 0.6184 | 0.99999967 | 0.6184 | 0 | 0 | 0 | 1 Ref      |
| JP974308 | Unassigned | Unassigned | Unassigned | 182_0  | Clustered           | 5 VC_182_0   | 5   | 0.6184 | 0.99999967 | 0.6184 | 0 | 0 | 0 | 1 Ref      |
| JP974312 | Unassigned | Unassigned | Unassigned | 460_0  | Clustered           | 19 VC_460_0  | 19  | 0.3744 | 1          | 0.3744 | 0 | 0 | 0 | 1 Ref      |
| JP974313 | Unassigned | Unassigned | Unassigned | 642_2  | Clustered           | 6 VC_642_2   | 6   | 0.1679 | 1          | 0.1679 | 0 | 0 | 0 | 1 Ref      |
| JP974314 | Unassigned | Unassigned | Unassigned | 21_0   | Clustered           | 4 VC_21_0    | 4   | 0.5696 | 0.87262442 | 0.4971 | 0 | 0 | 0 | 0.6667 Ref |
| JP974321 | Unassigned | Unassigned | Unassigned | 928_0  | Clustered           | 3 VC_928_0   | 3   | 0.7844 | 0.9944138  | 0.78   | 0 | 0 | 0 | 1 Ref      |
| JP974339 | Unassigned | Unassigned | Unassigned | 30_1   | Clustered           | 16 VC_30_1   | 16  | 0.1973 | 1          | 0.1973 | 0 | 0 | 0 | 0.8333 Ref |
| NO060601 | Unassigned | Unassigned | Unassigned | 551_2  | Clustered           | 17 VC_551_2  | 17  | 0.0973 | 1          | 0.0973 | 0 | 0 | 0 | 0.9779 Ref |
| NO060602 | Unassigned | Unassigned | Unassigned | 551_2  | Clustered           | 17 VC_551_2  | 17  | 0.0973 | 1          | 0.0973 | 0 | 0 | 0 | 0.9779 Ref |
| NO060603 | Unassigned | Unassigned | Unassigned | 371_15 | Clustered           | 44 VC_371_15 | 44  | 0.1391 | 1          | 0.1391 | 0 | 0 | 0 | 0.7474 Ref |
| NO060604 | Unassigned | Unassigned | Unassigned | 371_21 | Clustered           | 2 VC_371_21  | 2   | 0.0033 | 0.95770737 | 0.0032 | 0 | 0 | 0 | 1 Ref      |
| NO20140  | Unassigned | Unassigned | Unassigned | 325_19 | Clustered           | 3 VC_325_19  | 3   | 0.0108 | 0.99859221 | 0.0107 | 0 | 0 | 0 | 1 Ref      |
| NO20141  | Unassigned | Unassigned | Unassigned | 520_28 | Clustered           | 2 VC_520_28  | 2   | 0.0137 | 0.95761531 | 0.0131 | 0 | 0 | 0 | 1 Ref      |
| NO20142  | Unassigned | Unassigned | Unassigned | 520_88 | Clustered/Singleton | 1 VC_520_88  | 1   | 0      | 1          | 0      | 0 | 0 | 0 | 1 Ref      |
| NO20143  | Unassigned | Unassigned | Unassigned | 520_43 | Clustered           | 3 VC_520_43  | 3   | 0.0193 | 0.99837043 | 0.0193 | 0 | 0 | 0 | 1 Ref      |
| NO222534 | Unassigned | Unassigned | Unassigned | 64_0   | Clustered           | 3 VC_64_0    | 3   | 0.5503 | 0.99785685 | 0.5491 | 0 | 0 | 0 | 1 Ref      |
| NO35618  | Unassigned | Unassigned | Unassigned | 866_0  | Clustered           | 4 VC_866_0   | 4   | 0.0795 | 0.99998595 | 0.0795 | 0 | 0 | 0 | 1 Ref      |
| NO49605  | Unassigned | Unassigned | Unassigned | 223_0  | Clustered           | 38 VC_223_0  | 38  | 0.9095 | 1          | 0.9095 | 0 | 0 | 0 | 1 Ref      |
| NO51154  | Unassigned | Unassigned | Unassigned | 577_0  | Clustered           | 6 VC_577_0   | 6   | 0.9267 | 0.99999993 | 0.9267 | 0 | 0 | 0 | 1 Ref      |
| NO83852  | Unassigned | Unassigned | Unassigned | 940_0  | Clustered           | 34 VC_940_0  | 34  | 0.7959 | 1          | 0.7959 | 0 | 0 | 0 | 1 Ref      |
| NO83853  | Unassigned | Unassigned | Unassigned | 940_0  | Clustered           | 34 VC_940_0  | 34  | 0.7959 | 1          | 0.7959 | 0 | 0 | 0 | 1 Ref      |
| NO116822 | Unassigned | Unassigned | Unassigned | 949_0  | Clustered           | 10 VC_949_0  | 10  | 0.5977 | 1          | 0.5977 | 0 | 0 | 0 | 1 Ref      |
| NO116823 | Unassigned | Unassigned | Unassigned | 953_0  | Clustered           | 2 VC_953_0   | 2   | 0.2116 | 0.94820857 | 0.2007 | 0 | 0 | 0 | 1 Ref      |



|          |            |            |            |         |                     |              |     |        |            |        |   |   |   |            |
|----------|------------|------------|------------|---------|---------------------|--------------|-----|--------|------------|--------|---|---|---|------------|
| JN116824 | Unassigned | Unassigned | Unassigned | 726_0   | Clustered           | 3 VC_726_0   | 3   | 0.0381 | 0.88955608 | 0.0339 | 0 | 0 | 0 | 1 Ref      |
| JN116826 | Unassigned | Unassigned | Unassigned | 956_0   | Clustered           | 39 VC_956_0  | 39  | 1      | 1          | 1      | 0 | 0 | 0 | 1 Ref      |
| JN116827 | Unassigned | Unassigned | Unassigned | 956_0   | Clustered           | 39 VC_956_0  | 39  | 1      | 1          | 1      | 0 | 0 | 0 | 1 Ref      |
| JN116828 | Unassigned | Unassigned | Unassigned | 952_0   | Clustered           | 2 VC_952_0   | 2   | 0.9556 | 0.8861     | 0.8468 | 0 | 0 | 0 | 1 Ref      |
| JN126049 | Unassigned | Unassigned | Unassigned | 133_13  | Clustered           | 2 VC_133_13  | 2   | 0.0051 | 0.86794768 | 0.0044 | 0 | 0 | 0 | 1 Ref      |
| JN132397 | Unassigned | Unassigned | Unassigned | 844_0   | Clustered           | 27 VC_844_0  | 27  | 0.9385 | 1          | 0.9385 | 0 | 0 | 0 | 1 Ref      |
| JN153085 | Unassigned | Unassigned | Unassigned | 325_52  | Clustered           | 5 VC_325_52  | 5   | 0.0147 | 0.99999073 | 0.0147 | 0 | 0 | 0 | 0.7 Ref    |
| JN153086 | Unassigned | Unassigned | Unassigned | 325_61  | Clustered           | 8 VC_325_61  | 8   | 0.0395 | 1          | 0.0395 | 0 | 0 | 0 | 0.7857 Ref |
| JN175269 | Unassigned | Unassigned | Unassigned | 957_0   | Clustered/Singleton | 1 VC_957_0   | 1   | 0      | 1          | 0      | 0 | 0 | 0 | 1 Ref      |
| JN185608 | Unassigned | Unassigned | Unassigned | 236_0   | Clustered           | 72 VC_236_0  | 72  | 0.8104 | 1          | 0.8104 | 0 | 0 | 0 | 1 Ref      |
| JN190960 | Unassigned | Unassigned | Unassigned | 602_0   | Clustered           | 2 VC_602_0   | 2   | 0.229  | 0.95560552 | 0.2188 | 0 | 0 | 0 | 1 Ref      |
| JN192463 | Unassigned | Unassigned | Unassigned | 371_13  | Clustered           | 33 VC_371_13 | 33  | 0.179  | 1          | 0.179  | 0 | 0 | 0 | 0.8769 Ref |
| JN201525 | Unassigned | Unassigned | Unassigned | 546_0   | Clustered           | 2 VC_546_0   | 2   | 0.0136 | 0.63748598 | 0.0087 | 0 | 0 | 0 | 1 Ref      |
| JN202312 | Unassigned | Unassigned | Unassigned | 283_148 | Clustered/Singleton | 1 VC_283_148 | 1   | 0      | 1          | 0      | 0 | 0 | 0 | 1 Ref      |
| JN204348 | Unassigned | Unassigned | Unassigned | 558_0   | Clustered           | 2 VC_558_0   | 2   | 0.0032 | 0.75858499 | 0.0025 | 0 | 0 | 0 | 1 Ref      |
| JN225449 | Unassigned | Unassigned | Unassigned | 329_4   | Clustered           | 2 VC_329_4   | 2   | 0.0052 | 0.95746454 | 0.005  | 0 | 0 | 0 | 1 Ref      |
| JN243855 | Unassigned | Unassigned | Unassigned | 238_0   | Clustered           | 17 VC_238_0  | 17  | 0.6109 | 1          | 0.6109 | 0 | 0 | 0 | 1 Ref      |
| JN243856 | Unassigned | Unassigned | Unassigned | 517_1   | Clustered           | 108 VC_517_1 | 108 | 0.8483 | 1          | 0.8483 | 0 | 0 | 0 | 0.9955 Ref |
| JN243857 | Unassigned | Unassigned | Unassigned | 517_0   | Clustered           | 18 VC_517_0  | 18  | 0.1599 | 1          | 0.1599 | 0 | 0 | 0 | 1 Ref      |
| JN254800 | Unassigned | Unassigned | Unassigned | 79_0    | Clustered           | 64 VC_79_0   | 64  | 0.4185 | 1          | 0.4185 | 0 | 0 | 0 | 0.7649 Ref |
| JN254801 | Unassigned | Unassigned | Unassigned | 472_0   | Clustered           | 47 VC_472_0  | 47  | 0.9025 | 1          | 0.9025 | 0 | 0 | 0 | 1 Ref      |
| JN255163 | Unassigned | Unassigned | Unassigned | 4_0     | Clustered           | 7 VC_4_0     | 7   | 0.7912 | 1          | 0.7912 | 0 | 0 | 0 | 1 Ref      |
| JN256079 | Unassigned | Unassigned | Unassigned | 521_0   | Clustered           | 37 VC_521_0  | 37  | 0.912  | 1          | 0.912  | 0 | 0 | 0 | 1 Ref      |
| JN371769 | Unassigned | Unassigned | Unassigned | 655_4   | Clustered/Singleton | 1 VC_655_4   | 1   | 0      | 1          | 0      | 0 | 0 | 0 | 1 Ref      |
| JN377894 | Unassigned | Unassigned | Unassigned | 600_2   | Clustered           | 10 VC_600_2  | 10  | 0.3041 | 1          | 0.3041 | 0 | 0 | 0 | 1 Ref      |
| JN377895 | Unassigned | Unassigned | Unassigned | 600_2   | Clustered           | 10 VC_600_2  | 10  | 0.3041 | 1          | 0.3041 | 0 | 0 | 0 | 1 Ref      |
| JN382248 | Unassigned | Unassigned | Unassigned | 551_7   | Clustered           | 28 VC_551_7  | 28  | 0.1661 | 1          | 0.1661 | 0 | 0 | 0 | 0.8519 Ref |
| JN391180 | Unassigned | Unassigned | Unassigned | 476_0   | Clustered           | 19 VC_476_0  | 19  | 0.7814 | 1          | 0.7814 | 0 | 0 | 0 | 1 Ref      |
| JN391441 | Unassigned | Unassigned | Unassigned | 551_7   | Clustered           | 28 VC_551_7  | 28  | 0.1661 | 1          | 0.1661 | 0 | 0 | 0 | 0.8519 Ref |
| JN398368 | Unassigned | Unassigned | Unassigned | 520_76  | Clustered           | 2 VC_520_76  | 2   | 0.0092 | 0.95761376 | 0.0088 | 0 | 0 | 0 | 1 Ref      |
| JN398369 | Unassigned | Unassigned | Unassigned | 325_1   | Clustered           | 2 VC_325_1   | 2   | 0.0043 | 0.95663348 | 0.0041 | 0 | 0 | 0 | 1 Ref      |
| JN408459 | Unassigned | Unassigned | Unassigned | 940_0   | Clustered           | 34 VC_940_0  | 34  | 0.7959 | 1          | 0.7959 | 0 | 0 | 0 | 1 Ref      |
| JN408460 | Unassigned | Unassigned | Unassigned | 216_6   | Clustered           | 42 VC_216_6  | 42  | 0.473  | 1          | 0.473  | 0 | 0 | 0 | 0.8351 Ref |
| JN408461 | Unassigned | Unassigned | Unassigned | 216_3   | Clustered           | 8 VC_216_3   | 8   | 0.0701 | 1          | 0.0701 | 0 | 0 | 0 | 0.8571 Ref |
| JN412588 | Unassigned | Unassigned | Unassigned | 558_80  | Clustered/Singleton | 1 VC_558_80  | 1   | 0      | 1          | 0      | 0 | 0 | 0 | 1 Ref      |
| JN412589 | Unassigned | Unassigned | Unassigned | 569_0   | Clustered           | 3 VC_569_0   | 3   | 0.2094 | 0.99849867 | 0.2091 | 0 | 0 | 0 | 1 Ref      |
| JN412590 | Unassigned | Unassigned | Unassigned | 551_4   | Clustered           | 2 VC_551_4   | 2   | 0.006  | 0.95695857 | 0.0058 | 0 | 0 | 0 | 1 Ref      |
| JN412591 | Unassigned | Unassigned | Unassigned | 519_0   | Clustered           | 39 VC_519_0  | 39  | 0.8156 | 1          | 0.8156 | 0 | 0 | 0 | 1 Ref      |
| JN412592 | Unassigned | Unassigned | Unassigned | 558_0   | Clustered           | 2 VC_558_0   | 2   | 0.0032 | 0.75858499 | 0.0025 | 0 | 0 | 0 | 1 Ref      |
| JN412593 | Unassigned | Unassigned | Unassigned | 761_0   | Clustered           | 67 VC_761_0  | 67  | 0.8947 | 1          | 0.8947 | 0 | 0 | 0 | 1 Ref      |
| JN542517 | Unassigned | Unassigned | Unassigned | 520_59  | Clustered           | 5 VC_520_59  | 5   | 0.0459 | 0.99999997 | 0.0459 | 0 | 0 | 0 | 1 Ref      |
| JN561150 | Unassigned | Unassigned | Unassigned | 517_1   | Clustered           | 108 VC_517_1 | 108 | 0.8483 | 1          | 0.8483 | 0 | 0 | 0 | 0.9955 Ref |
| JN572061 | Unassigned | Unassigned | Unassigned | 519_0   | Clustered           | 39 VC_519_0  | 39  | 0.8156 | 1          | 0.8156 | 0 | 0 | 0 | 1 Ref      |
| JN572689 | Unassigned | Unassigned | Unassigned | 325_35  | Clustered           | 17 VC_325_35 | 17  | 0.0732 | 1          | 0.0732 | 0 | 0 | 0 | 0.7721 Ref |
| JN585957 | Unassigned | Unassigned | Unassigned | 359_0   | Clustered           | 7 VC_359_0   | 7   | 0.3703 | 1          | 0.3703 | 0 | 0 | 0 | 1 Ref      |
| JN593240 | Unassigned | Unassigned | Unassigned | 133_25  | Clustered/Singleton | 1 VC_133_25  | 1   | 0      | 1          | 0      | 0 | 0 | 0 | 1 Ref      |
| JN600672 | Unassigned | Unassigned | Unassigned | 887_0   | Clustered           | 18 VC_887_0  | 18  | 0.3663 | 1          | 0.3663 | 0 | 0 | 0 | 1 Ref      |
| JN600960 | Unassigned | Unassigned | Unassigned | 30_1    | Clustered           | 16 VC_30_1   | 16  | 0.1973 | 1          | 0.1973 | 0 | 0 | 0 | 0.8333 Ref |
| JN618996 | Unassigned | Unassigned | Unassigned | 508_0   | Clustered           | 32 VC_508_0  | 32  | 0.906  | 1          | 0.906  | 0 | 0 | 0 | 1 Ref      |
| JN624850 | Unassigned | Unassigned | Unassigned | 558_49  | Clustered           | 7 VC_558_49  | 7   | 0.0194 | 0.99510369 | 0.0193 | 0 | 0 | 0 | 0.8571 Ref |
| JN624851 | Unassigned | Unassigned | Unassigned | 521_0   | Clustered           | 37 VC_521_0  | 37  | 0.912  | 1          | 0.912  | 0 | 0 | 0 | 1 Ref      |
| JN627160 | Unassigned | Unassigned | Unassigned | 442_2   | Clustered           | 4 VC_442_2   | 4   | 0.0844 | 0.99988129 | 0.0844 | 0 | 0 | 0 | 0.8333 Ref |
| JN638752 | Unassigned | Unassigned | Unassigned | 371_15  | Clustered           | 44 VC_371_15 | 44  | 0.1391 | 1          | 0.1391 | 0 | 0 | 0 | 0.7474 Ref |
| JN638753 | Unassigned | Unassigned | Unassigned | 371_15  | Clustered           | 44 VC_371_15 | 44  | 0.1391 | 1          | 0.1391 | 0 | 0 | 0 | 0.7474 Ref |
| JN641803 | Unassigned | Unassigned | Unassigned | 959_5   | Clustered           | 19 VC_959_5  | 19  | 0.2626 | 1          | 0.2626 | 0 | 0 | 0 | 1 Ref      |
| JN643714 | Unassigned | Unassigned | Unassigned | 236_0   | Clustered           | 72 VC_236_0  | 72  | 0.8104 | 1          | 0.8104 | 0 | 0 | 0 | 1 Ref      |
| JN651747 | Unassigned | Unassigned | Unassigned | 878_0   | Clustered           | 32 VC_878_0  | 32  | 0.9965 | 1          | 0.9965 | 0 | 0 | 0 | 1 Ref      |
| JN654439 | Unassigned | Unassigned | Unassigned | 884_1   | Clustered           | 8 VC_884_1   | 8   | 0.1102 | 0.9989323  | 0.1101 | 0 | 0 | 0 | 0.75 Ref   |
| JN660814 | Unassigned | Unassigned | Unassigned | 325_44  | Clustered           | 3 VC_325_44  | 3   | 0.0157 | 0.99859171 | 0.0157 | 0 | 0 | 0 | 1 Ref      |
| JN662425 | Unassigned | Unassigned | Unassigned | 162_0   | Clustered           | 18 VC_162_0  | 18  | 0.7403 | 1          | 0.7403 | 0 | 0 | 0 | 0.8627 Ref |
| JN672684 | Unassigned | Unassigned | Unassigned | 937_0   | Clustered           | 40 VC_937_0  | 40  | 0.6809 | 1          | 0.6809 | 0 | 0 | 0 | 0.9359 Ref |
| JN673056 | Unassigned | Unassigned | Unassigned | 133_26  | Clustered/Singleton | 1 VC_133_26  | 1   | 0      | 1          | 0      | 0 | 0 | 0 | 1 Ref      |
| JN680858 | Unassigned | Unassigned | Unassigned | 888_0   | Clustered           | 28 VC_888_0  | 28  | 0.5497 | 1          | 0.5497 | 0 | 0 | 0 | 1 Ref      |
| JN687951 | Unassigned | Unassigned | Unassigned | 325_60  | Clustered           | 2 VC_325_60  | 2   | 0.0038 | 0.957513   | 0.0036 | 0 | 0 | 0 | 1 Ref      |
| JN698989 | Unassigned | Unassigned | Unassigned | 371_18  | Clustered           | 10 VC_371_18 | 10  | 0.0302 | 1          | 0.0302 | 0 | 0 | 0 | 0.8 Ref    |
| JN698990 | Unassigned | Unassigned | Unassigned | 371_17  | Clustered           | 3 VC_371_17  | 3   | 0.0076 | 0.99811676 | 0.0076 | 0 | 0 | 0 | 1 Ref      |
| JN698991 | Unassigned | Unassigned | Unassigned | 508_0   | Clustered           | 32 VC_508_0  | 32  | 0.906  | 1          | 0.906  | 0 | 0 | 0 | 1 Ref      |
| JN698992 | Unassigned | Unassigned | Unassigned | 509_0   | Clustered           | 37 VC_509_0  | 37  | 0.9689 | 1          | 0.9689 | 0 | 0 | 0 | 1 Ref      |
| JN698993 | Unassigned | Unassigned | Unassigned | 556_0   | Clustered           | 21 VC_556_0  | 21  | 0.9912 | 1          | 0.9912 | 0 | 0 | 0 | 1 Ref      |
| JN698994 | Unassigned | Unassigned | Unassigned | 554_0   | Clustered           | 2 VC_554_0   | 2   | 0.2292 | 0.95193785 | 0.2181 | 0 | 0 | 0 | 1 Ref      |
| JN698995 | Unassigned | Unassigned | Unassigned | 511_0   | Clustered           | 3 VC_511_0   | 3   | 0.1104 | 0.99858683 | 0.1103 | 0 | 0 | 0 | 1 Ref      |
| JN698996 | Unassigned | Unassigned | Unassigned | 520_26  | Clustered           | 3 VC_520_26  | 3   | 0.026  | 0.99859898 | 0.026  | 0 | 0 | 0 | 1 Ref      |
| JN698997 | Unassigned | Unassigned | Unassigned | 546_2   | Clustered           | 3 VC_546_2   | 3   | 0.0275 | 0.85260342 | 0.0234 | 0 | 0 | 0 | 1 Ref      |
| JN698998 | Unassigned | Unassigned | Unassigned | 325_61  | Clustered           | 8 VC_325_61  | 8   | 0.0395 | 1          | 0.0395 | 0 | 0 | 0 | 0.7857 Ref |
| JN698999 | Unassigned | Unassigned | Unassigned | 223_0   | Clustered           | 38 VC_223_0  | 38  | 0.9095 | 1          | 0.9095 | 0 | 0 | 0 | 1 Ref      |
| JN699000 | Unassigned | Unassigned | Unassigned | 325_47  | Clustered           | 2 VC_325_47  | 2   | 0.0045 | 0.9575092  | 0.0043 | 0 | 0 | 0 | 1 Ref      |
| JN699001 | Unassigned | Unassigned | Unassigned | 518_0   | Clustered           | 6 VC_518_0   | 6   | 0.1295 | 1          | 0.1295 | 0 | 0 | 0 | 1 Ref      |
| JN699002 | Unassigned | Unassigned | Unassigned | 761_0   | Clustered           | 67 VC_761_0  | 67  | 0.8947 | 1          | 0.8947 | 0 | 0 | 0 | 1 Ref      |
| JN699003 | Unassigned | Unassigned | Unassigned | 509_0   | Clustered           | 37 VC_509_0  | 37  | 0.9689 | 1          | 0.9689 | 0 | 0 | 0 | 1 Ref      |
| JN699004 | Unassigned | Unassigned | Unassigned | 508_0   | Clustered           | 32 VC_508_0  | 32  | 0.906  | 1          | 0.906  | 0 | 0 | 0 | 1 Ref      |
| JN699005 | Unassigned | Unassigned | Unassigned | 225_0   | Clustered           | 32 VC_225_0  | 32  | 0.848  | 1          | 0.848  | 0 | 0 | 0 | 0.996 Ref  |



|          |            |            |            |         |                     |              |     |        |            |        |   |   |   |            |
|----------|------------|------------|------------|---------|---------------------|--------------|-----|--------|------------|--------|---|---|---|------------|
| JN699006 | Unassigned | Unassigned | Unassigned | 509_0   | Clustered           | 37 VC_509_0  | 37  | 0.9689 | 1          | 0.9689 | 0 | 0 | 0 | 1 Ref      |
| JN699007 | Unassigned | Unassigned | Unassigned | 372_1   | Clustered           | 9 VC_372_1   | 9   | 0.194  | 1          | 0.194  | 0 | 0 | 0 | 1 Ref      |
| JN699008 | Unassigned | Unassigned | Unassigned | 371_15  | Clustered           | 44 VC_371_15 | 44  | 0.1391 | 1          | 0.1391 | 0 | 0 | 0 | 0.7474 Ref |
| JN699009 | Unassigned | Unassigned | Unassigned | 371_16  | Clustered           | 42 VC_371_16 | 42  | 0.1341 | 1          | 0.1341 | 0 | 0 | 0 | 0.7282 Ref |
| JN699010 | Unassigned | Unassigned | Unassigned | 371_15  | Clustered           | 44 VC_371_15 | 44  | 0.1391 | 1          | 0.1391 | 0 | 0 | 0 | 0.7474 Ref |
| JN699011 | Unassigned | Unassigned | Unassigned | 372_0   | Clustered           | 24 VC_372_0  | 24  | 0.5539 | 1          | 0.5539 | 0 | 0 | 0 | 1 Ref      |
| JN699012 | Unassigned | Unassigned | Unassigned | 520_20  | Clustered/Singleton | 1 VC_520_20  | 1   | 0      | 1          | 0      | 0 | 0 | 0 | 1 Ref      |
| JN699013 | Unassigned | Unassigned | Unassigned | 558_8   | Clustered           | 2 VC_558_8   | 2   | 0.0032 | 0.68030512 | 0.0022 | 0 | 0 | 0 | 1 Ref      |
| JN699014 | Unassigned | Unassigned | Unassigned | 565_0   | Clustered           | 20 VC_565_0  | 20  | 0.8398 | 1          | 0.8398 | 0 | 0 | 0 | 1 Ref      |
| JN699015 | Unassigned | Unassigned | Unassigned | 517_1   | Clustered           | 108 VC_517_1 | 108 | 0.8483 | 1          | 0.8483 | 0 | 0 | 0 | 0.9955 Ref |
| JN699016 | Unassigned | Unassigned | Unassigned | 325_42  | Clustered           | 4 VC_325_42  | 4   | 0.0112 | 0.99980442 | 0.0112 | 0 | 0 | 0 | 0.6667 Ref |
| JN699017 | Unassigned | Unassigned | Unassigned | 371_17  | Clustered           | 3 VC_371_17  | 3   | 0.0076 | 0.99811676 | 0.0076 | 0 | 0 | 0 | 1 Ref      |
| JN699018 | Unassigned | Unassigned | Unassigned | 509_0   | Clustered           | 37 VC_509_0  | 37  | 0.9689 | 1          | 0.9689 | 0 | 0 | 0 | 1 Ref      |
| JN699019 | Unassigned | Unassigned | Unassigned | 223_0   | Clustered           | 38 VC_223_0  | 38  | 0.9095 | 1          | 0.9095 | 0 | 0 | 0 | 1 Ref      |
| JN699625 | Unassigned | Unassigned | Unassigned | 558_30  | Clustered           | 3 VC_558_30  | 3   | 0.0064 | 0.76574053 | 0.0049 | 0 | 0 | 0 | 1 Ref      |
| JN699626 | Unassigned | Unassigned | Unassigned | 558_63  | Clustered/Singleton | 1 VC_558_63  | 1   | 0      | 1          | 0      | 0 | 0 | 0 | 1 Ref      |
| JN699627 | Unassigned | Unassigned | Unassigned | 558_78  | Clustered/Singleton | 1 VC_558_78  | 1   | 0      | 1          | 0      | 0 | 0 | 0 | 1 Ref      |
| JN699628 | Unassigned | Unassigned | Unassigned | 763_1   | Clustered           | 9 VC_763_1   | 9   | 0.3706 | 1          | 0.3706 | 0 | 0 | 0 | 1 Ref      |
| JN712910 | Unassigned | Unassigned | Unassigned | 960_0   | Clustered/Singleton | 1 VC_960_0   | 1   | 0      | 1          | 0      | 0 | 0 | 0 | 1 Ref      |
| JN790865 | Unassigned | Unassigned | Unassigned | 883_2   | Clustered           | 2 VC_883_2   | 2   | 0.0181 | 0.88094852 | 0.016  | 0 | 0 | 0 | 1 Ref      |
| JN797796 | Unassigned | Unassigned | Unassigned | 883_2   | Clustered           | 2 VC_883_2   | 2   | 0.0181 | 0.88094852 | 0.016  | 0 | 0 | 0 | 1 Ref      |
| JN797797 | Unassigned | Unassigned | Unassigned | 187_1   | Clustered           | 7 VC_187_1   | 7   | 0.1423 | 1          | 0.1423 | 0 | 0 | 0 | 1 Ref      |
| JN797798 | Unassigned | Unassigned | Unassigned | 187_1   | Clustered           | 7 VC_187_1   | 7   | 0.1423 | 1          | 0.1423 | 0 | 0 | 0 | 1 Ref      |
| JN800508 | Unassigned | Unassigned | Unassigned | 897_0   | Clustered           | 6 VC_897_0   | 6   | 0.4156 | 1          | 0.4156 | 0 | 0 | 0 | 1 Ref      |
| JN808773 | Unassigned | Unassigned | Unassigned | 179_0   | Clustered           | 53 VC_179_0  | 53  | 0.9137 | 1          | 0.9137 | 0 | 0 | 0 | 1 Ref      |
| JN811560 | Unassigned | Unassigned | Unassigned | 179_0   | Clustered           | 53 VC_179_0  | 53  | 0.9137 | 1          | 0.9137 | 0 | 0 | 0 | 1 Ref      |
| JN831653 | Unassigned | Unassigned | Unassigned | 234_0   | Clustered           | 21 VC_234_0  | 21  | 0.8355 | 1          | 0.8355 | 0 | 0 | 0 | 1 Ref      |
| JN848801 | Unassigned | Unassigned | Unassigned | 26_0    | Clustered           | 4 VC_26_0    | 4   | 0.7433 | 0.99936153 | 0.7428 | 0 | 0 | 0 | 1 Ref      |
| JN849462 | Unassigned | Unassigned | Unassigned | 531_1   | Clustered           | 6 VC_531_1   | 6   | 0.1481 | 0.99978665 | 0.148  | 0 | 0 | 0 | 1 Ref      |
| JN859129 | Unassigned | Unassigned | Unassigned | 520_23  | Clustered           | 2 VC_520_23  | 2   | 0.0077 | 0.95763408 | 0.0074 | 0 | 0 | 0 | 1 Ref      |
| JN871591 | Unassigned | Unassigned | Unassigned | 592_0   | Clustered           | 50 VC_592_0  | 50  | 0.7314 | 1          | 0.7314 | 0 | 0 | 0 | 1 Ref      |
| JN882264 | Unassigned | Unassigned | Unassigned | 834_0   | Clustered           | 7 VC_834_0   | 7   | 0.9845 | 0.94276893 | 0.9282 | 0 | 0 | 0 | 1 Ref      |
| JN882266 | Unassigned | Unassigned | Unassigned | 834_0   | Clustered           | 7 VC_834_0   | 7   | 0.9845 | 0.94276893 | 0.9282 | 0 | 0 | 0 | 1 Ref      |
| JN882267 | Unassigned | Unassigned | Unassigned | 962_0   | Clustered           | 2 VC_962_0   | 2   | 0.3572 | 0.92263554 | 0.3295 | 0 | 0 | 0 | 1 Ref      |
| JN882284 | Unassigned | Unassigned | Unassigned | 582_4   | Clustered           | 3 VC_582_4   | 3   | 0.0348 | 0.98173503 | 0.0341 | 0 | 0 | 0 | 1 Ref      |
| JN882285 | Unassigned | Unassigned | Unassigned | 164_4   | Clustered/Singleton | 1 VC_164_4   | 1   | 0      | 1          | 0      | 0 | 0 | 0 | 1 Ref      |
| JN882286 | Unassigned | Unassigned | Unassigned | 812_2   | Clustered           | 2 VC_812_2   | 2   | 0.0668 | 0.95518138 | 0.0639 | 0 | 0 | 0 | 1 Ref      |
| JN882287 | Unassigned | Unassigned | Unassigned | 669_0   | Clustered           | 21 VC_669_0  | 21  | 0.3623 | 1          | 0.3623 | 0 | 0 | 0 | 1 Ref      |
| JN882298 | Unassigned | Unassigned | Unassigned | 72_0    | Clustered           | 2 VC_72_0    | 2   | 0.0777 | 0.95616461 | 0.0743 | 0 | 0 | 0 | 1 Ref      |
| JN939331 | Unassigned | Unassigned | Unassigned | 879_0   | Clustered           | 36 VC_879_0  | 36  | 0.994  | 1          | 0.994  | 0 | 0 | 0 | 1 Ref      |
| JN939332 | Unassigned | Unassigned | Unassigned | 879_0   | Clustered           | 36 VC_879_0  | 36  | 0.994  | 1          | 0.994  | 0 | 0 | 0 | 1 Ref      |
| JN968479 | Unassigned | Unassigned | Unassigned | 666_0   | Clustered           | 4 VC_666_0   | 4   | 1      | 1          | 1      | 0 | 0 | 0 | 1 Ref      |
| JN984867 | Unassigned | Unassigned | Unassigned | 835_0   | Clustered           | 67 VC_835_0  | 67  | 0.9624 | 1          | 0.9624 | 0 | 0 | 0 | 1 Ref      |
| JN986844 | Unassigned | Unassigned | Unassigned | 452_0   | Clustered           | 66 VC_452_0  | 66  | 0.9248 | 1          | 0.9248 | 0 | 0 | 0 | 1 Ref      |
| JN986845 | Unassigned | Unassigned | Unassigned | 456_0   | Clustered           | 62 VC_456_0  | 62  | 0.9026 | 1          | 0.9026 | 0 | 0 | 0 | 1 Ref      |
| JN986846 | Unassigned | Unassigned | Unassigned | 283_115 | Clustered/Singleton | 1 VC_283_115 | 1   | 0      | 1          | 0      | 0 | 0 | 0 | 1 Ref      |
| JQ007353 | Unassigned | Unassigned | Unassigned | 637_0   | Clustered           | 115 VC_637_0 | 115 | 0.731  | 1          | 0.731  | 0 | 0 | 0 | 0.8764 Ref |
| JQ010983 | Unassigned | Unassigned | Unassigned | 943_0   | Clustered           | 2 VC_943_0   | 2   | 1      | 1          | 1      | 0 | 0 | 0 | 1 Ref      |
| JQ011317 | Unassigned | Unassigned | Unassigned | 476_0   | Clustered           | 19 VC_476_0  | 19  | 0.7814 | 1          | 0.7814 | 0 | 0 | 0 | 1 Ref      |
| JQ011318 | Unassigned | Unassigned | Unassigned | 42_0    | Clustered           | 49 VC_42_0   | 49  | 0.4517 | 1          | 0.4517 | 0 | 0 | 0 | 0.8597 Ref |
| JQ015307 | Unassigned | Unassigned | Unassigned | 849_2   | Clustered           | 2 VC_849_2   | 2   | 0.0246 | 0.86513761 | 0.0213 | 0 | 0 | 0 | 1 Ref      |
| JQ031132 | Unassigned | Unassigned | Unassigned | 772_4   | Clustered           | 4 VC_772_4   | 4   | 0.0181 | 0.73018303 | 0.0132 | 0 | 0 | 0 | 1 Ref      |
| JQ062992 | Unassigned | Unassigned | Unassigned | 704_0   | Clustered           | 16 VC_704_0  | 16  | 0.7274 | 1          | 0.7274 | 0 | 0 | 0 | 1 Ref      |
| JQ067084 | Unassigned | Unassigned | Unassigned | 465_0   | Clustered           | 7 VC_465_0   | 7   | 0.3322 | 1          | 0.3322 | 0 | 0 | 0 | 1 Ref      |
| JQ067085 | Unassigned | Unassigned | Unassigned | 179_0   | Clustered           | 53 VC_179_0  | 53  | 0.9137 | 1          | 0.9137 | 0 | 0 | 0 | 1 Ref      |
| JQ067087 | Unassigned | Unassigned | Unassigned | 464_0   | Clustered           | 8 VC_464_0   | 8   | 0.2629 | 1          | 0.2629 | 0 | 0 | 0 | 1 Ref      |
| JQ067089 | Unassigned | Unassigned | Unassigned | 169_0   | Clustered           | 20 VC_169_0  | 20  | 0.7529 | 1          | 0.7529 | 0 | 0 | 0 | 1 Ref      |
| JQ067092 | Unassigned | Unassigned | Unassigned | 749_0   | Clustered           | 40 VC_749_0  | 40  | 0.7517 | 1          | 0.7517 | 0 | 0 | 0 | 1 Ref      |
| JQ067093 | Unassigned | Unassigned | Unassigned | 169_0   | Clustered           | 20 VC_169_0  | 20  | 0.7529 | 1          | 0.7529 | 0 | 0 | 0 | 1 Ref      |
| JQ086375 | Unassigned | Unassigned | Unassigned | 835_0   | Clustered           | 67 VC_835_0  | 67  | 0.9624 | 1          | 0.9624 | 0 | 0 | 0 | 1 Ref      |
| JQ086376 | Unassigned | Unassigned | Unassigned | 43_0    | Clustered           | 38 VC_43_0   | 38  | 0.5885 | 1          | 0.5885 | 0 | 0 | 0 | 0.9659 Ref |
| JQ177061 | Unassigned | Unassigned | Unassigned | 121_0   | Clustered           | 4 VC_121_0   | 4   | 0.1814 | 0.99998531 | 0.1814 | 0 | 0 | 0 | 1 Ref      |
| JQ177063 | Unassigned | Unassigned | Unassigned | 369_0   | Clustered           | 6 VC_369_0   | 6   | 0.5924 | 1          | 0.5924 | 0 | 0 | 0 | 1 Ref      |
| JQ177064 | Unassigned | Unassigned | Unassigned | 121_0   | Clustered           | 4 VC_121_0   | 4   | 0.1814 | 0.99998531 | 0.1814 | 0 | 0 | 0 | 1 Ref      |
| JQ182728 | Unassigned | Unassigned | Unassigned | 51_0    | Clustered           | 10 VC_51_0   | 10  | 0.1741 | 1          | 0.1741 | 0 | 0 | 0 | 1 Ref      |
| JQ182729 | Unassigned | Unassigned | Unassigned | 33_0    | Clustered           | 4 VC_33_0    | 4   | 0.06   | 0.99994826 | 0.06   | 0 | 0 | 0 | 1 Ref      |
| JQ182733 | Unassigned | Unassigned | Unassigned | 30_0    | Clustered           | 2 VC_30_0    | 2   | 0.037  | 0.95734635 | 0.0354 | 0 | 0 | 0 | 1 Ref      |
| JQ182734 | Unassigned | Unassigned | Unassigned | 30_0    | Clustered           | 2 VC_30_0    | 2   | 0.037  | 0.95734635 | 0.0354 | 0 | 0 | 0 | 1 Ref      |
| JQ182735 | Unassigned | Unassigned | Unassigned | 43_0    | Clustered           | 38 VC_43_0   | 38  | 0.5885 | 1          | 0.5885 | 0 | 0 | 0 | 0.9659 Ref |
| JQ182736 | Unassigned | Unassigned | Unassigned | 455_0   | Clustered           | 18 VC_455_0  | 18  | 0.4598 | 1          | 0.4598 | 0 | 0 | 0 | 1 Ref      |
| JQ245707 | Unassigned | Unassigned | Unassigned | 664_0   | Clustered           | 4 VC_664_0   | 4   | 0.263  | 0.99998747 | 0.263  | 0 | 0 | 0 | 1 Ref      |
| JQ287645 | Unassigned | Unassigned | Unassigned | 444_0   | Clustered           | 2 VC_444_0   | 2   | 0.8137 | 0.72985431 | 0.5939 | 0 | 0 | 0 | 1 Ref      |
| JQ300538 | Unassigned | Unassigned | Unassigned | 520_77  | Clustered           | 3 VC_520_77  | 3   | 0.0218 | 0.99859911 | 0.0218 | 0 | 0 | 0 | 1 Ref      |
| JQ307386 | Unassigned | Unassigned | Unassigned | 423_0   | Clustered           | 45 VC_423_0  | 45  | 0.9484 | 1          | 0.9484 | 0 | 0 | 0 | 1 Ref      |
| JQ307387 | Unassigned | Unassigned | Unassigned | 749_0   | Clustered           | 40 VC_749_0  | 40  | 0.7517 | 1          | 0.7517 | 0 | 0 | 0 | 1 Ref      |
| JQ309827 | Unassigned | Unassigned | Unassigned | 967_0   | Clustered           | 16 VC_967_0  | 16  | 0.8971 | 1          | 0.8971 | 0 | 0 | 0 | 1 Ref      |
| JQ312117 | Unassigned | Unassigned | Unassigned | 969_0   | Clustered           | 3 VC_969_0   | 3   | 0.8314 | 0.99762851 | 0.8295 | 0 | 0 | 0 | 1 Ref      |
| JQ340389 | Unassigned | Unassigned | Unassigned | 971_1   | Clustered           | 24 VC_971_1  | 24  | 0.7393 | 1          | 0.7393 | 0 | 0 | 0 | 0.8913 Ref |
| JQ340774 | Unassigned | Unassigned | Unassigned | 592_0   | Clustered           | 50 VC_592_0  | 50  | 0.7314 | 1          | 0.7314 | 0 | 0 | 0 | 1 Ref      |
| JQ347801 | Unassigned | Unassigned | Unassigned | 41_0    | Clustered           | 16 VC_41_0   | 16  | 0.2025 | 1          | 0.2025 | 0 | 0 | 0 | 0.9667 Ref |
| JQ408219 | Unassigned | Unassigned | Unassigned | 54_0    | Clustered           | 6 VC_54_0    | 6   | 0.6725 | 0.9999999  | 0.6725 | 0 | 0 | 0 | 1 Ref      |



|          |            |            |            |        |                     |              |     |        |            |        |   |   |   |            |
|----------|------------|------------|------------|--------|---------------------|--------------|-----|--------|------------|--------|---|---|---|------------|
| JQ512844 | Unassigned | Unassigned | Unassigned | 515_0  | Clustered           | 16 VC_515_0  | 16  | 0.3793 | 1          | 0.3793 | 0 | 0 | 0 | 1 Ref      |
| JQ513383 | Unassigned | Unassigned | Unassigned | 164_10 | Clustered           | 5 VC_164_10  | 5   | 0.0615 | 0.96483582 | 0.0593 | 0 | 0 | 0 | 1 Ref      |
| JQ617284 | Unassigned | Unassigned | Unassigned | 99_0   | Clustered           | 32 VC_99_0   | 32  | 0.8828 | 1          | 0.8828 | 0 | 0 | 0 | 1 Ref      |
| JQ619704 | Unassigned | Unassigned | Unassigned | 828_0  | Clustered           | 3 VC_828_0   | 3   | 0.4748 | 0.99843555 | 0.4741 | 0 | 0 | 0 | 1 Ref      |
| JQ659259 | Unassigned | Unassigned | Unassigned | 861_0  | Clustered           | 9 VC_861_0   | 9   | 0.5869 | 1          | 0.5869 | 0 | 0 | 0 | 1 Ref      |
| JQ684677 | Unassigned | Unassigned | Unassigned | 940_0  | Clustered           | 34 VC_940_0  | 34  | 0.7959 | 1          | 0.7959 | 0 | 0 | 0 | 1 Ref      |
| JQ686190 | Unassigned | Unassigned | Unassigned | 149_15 | Clustered           | 16 VC_149_15 | 16  | 0.0788 | 1          | 0.0788 | 0 | 0 | 0 | 0.8083 Ref |
| JQ691610 | Unassigned | Unassigned | Unassigned | 476_0  | Clustered           | 19 VC_476_0  | 19  | 0.7814 | 1          | 0.7814 | 0 | 0 | 0 | 1 Ref      |
| JQ691611 | Unassigned | Unassigned | Unassigned | 849_6  | Clustered           | 7 VC_849_6   | 7   | 0.164  | 0.99999999 | 0.164  | 0 | 0 | 0 | 0.9524 Ref |
| JQ691612 | Unassigned | Unassigned | Unassigned | 849_5  | Clustered           | 3 VC_849_5   | 3   | 0.0492 | 0.97574727 | 0.048  | 0 | 0 | 0 | 1 Ref      |
| JQ692107 | Unassigned | Unassigned | Unassigned | 882_0  | Clustered           | 20 VC_882_0  | 20  | 0.9917 | 1          | 0.9917 | 0 | 0 | 0 | 1 Ref      |
| JQ698665 | Unassigned | Unassigned | Unassigned | 325_35 | Clustered           | 17 VC_325_35 | 17  | 0.0732 | 1          | 0.0732 | 0 | 0 | 0 | 0.7721 Ref |
| JQ729990 | Unassigned | Unassigned | Unassigned | 898_0  | Clustered           | 10 VC_898_0  | 10  | 0.7284 | 1          | 0.7284 | 0 | 0 | 0 | 1 Ref      |
| JQ729991 | Unassigned | Unassigned | Unassigned | 898_0  | Clustered           | 10 VC_898_0  | 10  | 0.7284 | 1          | 0.7284 | 0 | 0 | 0 | 1 Ref      |
| JQ729992 | Unassigned | Unassigned | Unassigned | 898_0  | Clustered           | 10 VC_898_0  | 10  | 0.7284 | 1          | 0.7284 | 0 | 0 | 0 | 1 Ref      |
| JQ762257 | Unassigned | Unassigned | Unassigned | 179_0  | Clustered           | 53 VC_179_0  | 53  | 0.9137 | 1          | 0.9137 | 0 | 0 | 0 | 1 Ref      |
| JQ764986 | Unassigned | Unassigned | Unassigned | 303_0  | Clustered           | 155 VC_303_0 | 155 | 0.9979 | 1          | 0.9979 | 0 | 0 | 0 | 1 Ref      |
| JQ764987 | Unassigned | Unassigned | Unassigned | 303_0  | Clustered           | 155 VC_303_0 | 155 | 0.9979 | 1          | 0.9979 | 0 | 0 | 0 | 1 Ref      |
| JQ764988 | Unassigned | Unassigned | Unassigned | 303_0  | Clustered           | 155 VC_303_0 | 155 | 0.9979 | 1          | 0.9979 | 0 | 0 | 0 | 1 Ref      |
| JQ764989 | Unassigned | Unassigned | Unassigned | 303_0  | Clustered           | 155 VC_303_0 | 155 | 0.9979 | 1          | 0.9979 | 0 | 0 | 0 | 1 Ref      |
| JQ764990 | Unassigned | Unassigned | Unassigned | 303_0  | Clustered           | 155 VC_303_0 | 155 | 0.9979 | 1          | 0.9979 | 0 | 0 | 0 | 1 Ref      |
| JQ779023 | Unassigned | Unassigned | Unassigned | 8_0    | Clustered           | 58 VC_8_0    | 58  | 0.8306 | 1          | 0.8306 | 0 | 0 | 0 | 0.9946 Ref |
| JQ779024 | Unassigned | Unassigned | Unassigned | 9_0    | Clustered           | 38 VC_9_0    | 38  | 0.4895 | 1          | 0.4895 | 0 | 0 | 0 | 1 Ref      |
| JQ780163 | Unassigned | Unassigned | Unassigned | 82_0   | Clustered           | 24 VC_82_0   | 24  | 0.7351 | 1          | 0.7351 | 0 | 0 | 0 | 1 Ref      |
| JQ780327 | Unassigned | Unassigned | Unassigned | 230_0  | Clustered           | 3 VC_230_0   | 3   | 0.0739 | 0.9934951  | 0.0734 | 0 | 0 | 0 | 0.6667 Ref |
| JQ797329 | Unassigned | Unassigned | Unassigned | 739_0  | Clustered           | 26 VC_739_0  | 26  | 0.9571 | 1          | 0.9571 | 0 | 0 | 0 | 1 Ref      |
| JQ806763 | Unassigned | Unassigned | Unassigned | 28_1   | Clustered           | 53 VC_28_1   | 53  | 0.7164 | 1          | 0.7164 | 0 | 0 | 0 | 0.9325 Ref |
| JQ809650 | Unassigned | Unassigned | Unassigned | 304_0  | Clustered           | 11 VC_304_0  | 11  | 0.7869 | 1          | 0.7869 | 0 | 0 | 0 | 1 Ref      |
| JQ809701 | Unassigned | Unassigned | Unassigned | 517_1  | Clustered           | 108 VC_517_1 | 108 | 0.8483 | 1          | 0.8483 | 0 | 0 | 0 | 0.9955 Ref |
| JQ809703 | Unassigned | Unassigned | Unassigned | 325_35 | Clustered           | 17 VC_325_35 | 17  | 0.0732 | 1          | 0.0732 | 0 | 0 | 0 | 0.7721 Ref |
| JQ823122 | Unassigned | Unassigned | Unassigned | 974_0  | Clustered           | 2 VC_974_0   | 2   | 1      | 1          | 1      | 0 | 0 | 0 | 1 Ref      |
| JQ823123 | Unassigned | Unassigned | Unassigned | 974_0  | Clustered           | 2 VC_974_0   | 2   | 1      | 1          | 1      | 0 | 0 | 0 | 1 Ref      |
| JQ837901 | Unassigned | Unassigned | Unassigned | 452_0  | Clustered           | 66 VC_452_0  | 66  | 0.9248 | 1          | 0.9248 | 0 | 0 | 0 | 1 Ref      |
| JQ896627 | Unassigned | Unassigned | Unassigned | 517_1  | Clustered           | 108 VC_517_1 | 108 | 0.8483 | 1          | 0.8483 | 0 | 0 | 0 | 0.9955 Ref |
| JQ911768 | Unassigned | Unassigned | Unassigned | 558_50 | Clustered           | 15 VC_558_50 | 15  | 0.0468 | 1          | 0.0468 | 0 | 0 | 0 | 0.9238 Ref |
| JQ957925 | Unassigned | Unassigned | Unassigned | 392_0  | Clustered           | 126 VC_392_0 | 126 | 0.9621 | 1          | 0.9621 | 0 | 0 | 0 | 1 Ref      |
| JQ957932 | Unassigned | Unassigned | Unassigned | 8_0    | Clustered           | 58 VC_8_0    | 58  | 0.8306 | 1          | 0.8306 | 0 | 0 | 0 | 0.9946 Ref |
| JQ965645 | Unassigned | Unassigned | Unassigned | 723_0  | Clustered           | 9 VC_723_0   | 9   | 0.7138 | 1          | 0.7138 | 0 | 0 | 0 | 1 Ref      |
| JQ965700 | Unassigned | Unassigned | Unassigned | 392_0  | Clustered           | 126 VC_392_0 | 126 | 0.9621 | 1          | 0.9621 | 0 | 0 | 0 | 1 Ref      |
| JQ965701 | Unassigned | Unassigned | Unassigned | 392_0  | Clustered           | 126 VC_392_0 | 126 | 0.9621 | 1          | 0.9621 | 0 | 0 | 0 | 1 Ref      |
| JQ965702 | Unassigned | Unassigned | Unassigned | 386_0  | Clustered           | 49 VC_386_0  | 49  | 0.7941 | 1          | 0.7941 | 0 | 0 | 0 | 1 Ref      |
| JQ965703 | Unassigned | Unassigned | Unassigned | 392_0  | Clustered           | 126 VC_392_0 | 126 | 0.9621 | 1          | 0.9621 | 0 | 0 | 0 | 1 Ref      |
| JQ966307 | Unassigned | Unassigned | Unassigned | 315_0  | Clustered           | 12 VC_315_0  | 12  | 0.8947 | 1          | 0.8947 | 0 | 0 | 0 | 1 Ref      |
| JQ973847 | Unassigned | Unassigned | Unassigned | 12_0   | Clustered           | 21 VC_12_0   | 21  | 0.2274 | 1          | 0.2274 | 0 | 0 | 0 | 0.9571 Ref |
| JX000007 | Unassigned | Unassigned | Unassigned | 392_0  | Clustered           | 126 VC_392_0 | 126 | 0.9621 | 1          | 0.9621 | 0 | 0 | 0 | 1 Ref      |
| JX013863 | Unassigned | Unassigned | Unassigned | 12_2   | Clustered           | 19 VC_12_2   | 19  | 0.2018 | 1          | 0.2018 | 0 | 0 | 0 | 1 Ref      |
| JX042578 | Unassigned | Unassigned | Unassigned | 940_0  | Clustered           | 34 VC_940_0  | 34  | 0.7959 | 1          | 0.7959 | 0 | 0 | 0 | 1 Ref      |
| JX042579 | Unassigned | Unassigned | Unassigned | 237_1  | Clustered           | 13 VC_237_1  | 13  | 0.1773 | 1          | 0.1773 | 0 | 0 | 0 | 0.7308 Ref |
| JX080300 | Unassigned | Unassigned | Unassigned | 149_8  | Clustered           | 66 VC_149_8  | 66  | 0.4565 | 1          | 0.4565 | 0 | 0 | 0 | 0.8182 Ref |
| JX080301 | Unassigned | Unassigned | Unassigned | 149_8  | Clustered           | 66 VC_149_8  | 66  | 0.4565 | 1          | 0.4565 | 0 | 0 | 0 | 0.8182 Ref |
| JX080302 | Unassigned | Unassigned | Unassigned | 149_8  | Clustered           | 66 VC_149_8  | 66  | 0.4565 | 1          | 0.4565 | 0 | 0 | 0 | 0.8182 Ref |
| JX080303 | Unassigned | Unassigned | Unassigned | 149_8  | Clustered           | 66 VC_149_8  | 66  | 0.4565 | 1          | 0.4565 | 0 | 0 | 0 | 0.8182 Ref |
| JX080304 | Unassigned | Unassigned | Unassigned | 149_8  | Clustered           | 66 VC_149_8  | 66  | 0.4565 | 1          | 0.4565 | 0 | 0 | 0 | 0.8182 Ref |
| JX080305 | Unassigned | Unassigned | Unassigned | 149_8  | Clustered           | 66 VC_149_8  | 66  | 0.4565 | 1          | 0.4565 | 0 | 0 | 0 | 0.8182 Ref |
| JX094431 | Unassigned | Unassigned | Unassigned | 187_3  | Clustered           | 9 VC_187_3   | 9   | 0.1971 | 1          | 0.1971 | 0 | 0 | 0 | 0.8611 Ref |
| JX094499 | Unassigned | Unassigned | Unassigned | 592_0  | Clustered           | 50 VC_592_0  | 50  | 0.7314 | 1          | 0.7314 | 0 | 0 | 0 | 1 Ref      |
| JX094500 | Unassigned | Unassigned | Unassigned | 959_0  | Clustered           | 5 VC_959_0   | 5   | 0.0499 | 0.99999231 | 0.0499 | 0 | 0 | 0 | 1 Ref      |
| JX094501 | Unassigned | Unassigned | Unassigned | 12_2   | Clustered           | 19 VC_12_2   | 19  | 0.2018 | 1          | 0.2018 | 0 | 0 | 0 | 1 Ref      |
| JX100809 | Unassigned | Unassigned | Unassigned | 976_4  | Clustered           | 11 VC_976_4  | 11  | 0.3364 | 1          | 0.3364 | 0 | 0 | 0 | 1 Ref      |
| JX100810 | Unassigned | Unassigned | Unassigned | 976_2  | Clustered           | 2 VC_976_2   | 2   | 0.0278 | 0.95410794 | 0.0266 | 0 | 0 | 0 | 1 Ref      |
| JX100811 | Unassigned | Unassigned | Unassigned | 976_4  | Clustered           | 11 VC_976_4  | 11  | 0.3364 | 1          | 0.3364 | 0 | 0 | 0 | 1 Ref      |
| JX100812 | Unassigned | Unassigned | Unassigned | 976_4  | Clustered           | 11 VC_976_4  | 11  | 0.3364 | 1          | 0.3364 | 0 | 0 | 0 | 1 Ref      |
| JX100813 | Unassigned | Unassigned | Unassigned | 976_4  | Clustered           | 11 VC_976_4  | 11  | 0.3364 | 1          | 0.3364 | 0 | 0 | 0 | 1 Ref      |
| JX100814 | Unassigned | Unassigned | Unassigned | 976_3  | Clustered           | 2 VC_976_3   | 2   | 0.0258 | 0.88402892 | 0.0228 | 0 | 0 | 0 | 1 Ref      |
| JX104231 | Unassigned | Unassigned | Unassigned | 162_0  | Clustered           | 18 VC_162_0  | 18  | 0.7403 | 1          | 0.7403 | 0 | 0 | 0 | 0.8627 Ref |
| JX120799 | Unassigned | Unassigned | Unassigned | 379_0  | Clustered           | 5 VC_379_0   | 5   | 0.4779 | 0.99999992 | 0.4779 | 0 | 0 | 0 | 0.9 Ref    |
| JX121091 | Unassigned | Unassigned | Unassigned | 520_26 | Clustered           | 3 VC_520_26  | 3   | 0.026  | 0.99859898 | 0.026  | 0 | 0 | 0 | 1 Ref      |
| JX123262 | Unassigned | Unassigned | Unassigned | 443_2  | Clustered           | 10 VC_443_2  | 10  | 0.3344 | 1          | 0.3344 | 0 | 0 | 0 | 0.9333 Ref |
| JX126918 | Unassigned | Unassigned | Unassigned | 739_0  | Clustered           | 26 VC_739_0  | 26  | 0.9571 | 1          | 0.9571 | 0 | 0 | 0 | 1 Ref      |
| JX126919 | Unassigned | Unassigned | Unassigned | 980_0  | Clustered           | 10 VC_980_0  | 10  | 0.9996 | 1          | 0.9996 | 0 | 0 | 0 | 1 Ref      |
| JX126920 | Unassigned | Unassigned | Unassigned | 980_0  | Clustered           | 10 VC_980_0  | 10  | 0.9996 | 1          | 0.9996 | 0 | 0 | 0 | 1 Ref      |
| JX128257 | Unassigned | Unassigned | Unassigned | 133_22 | Clustered           | 13 VC_133_22 | 13  | 0.0804 | 1          | 0.0804 | 0 | 0 | 0 | 0.8205 Ref |
| JX128258 | Unassigned | Unassigned | Unassigned | 618_0  | Clustered           | 13 VC_618_0  | 13  | 0.6252 | 1          | 0.6252 | 0 | 0 | 0 | 1 Ref      |
| JX128259 | Unassigned | Unassigned | Unassigned | 283_95 | Clustered/Singleton | 1 VC_283_95  | 1   | 0      | 1          | 0      | 0 | 0 | 0 | 1 Ref      |
| JX131330 | Unassigned | Unassigned | Unassigned | 166_0  | Clustered           | 26 VC_166_0  | 26  | 0.7923 | 1          | 0.7923 | 0 | 0 | 0 | 1 Ref      |
| JX145342 | Unassigned | Unassigned | Unassigned | 647_0  | Clustered           | 11 VC_647_0  | 11  | 0.598  | 1          | 0.598  | 0 | 0 | 0 | 1 Ref      |
| JX163858 | Unassigned | Unassigned | Unassigned | 976_4  | Clustered           | 11 VC_976_4  | 11  | 0.3364 | 1          | 0.3364 | 0 | 0 | 0 | 1 Ref      |
| JX173487 | Unassigned | Unassigned | Unassigned | 130_0  | Clustered           | 19 VC_130_0  | 19  | 0.6068 | 1          | 0.6068 | 0 | 0 | 0 | 1 Ref      |
| JX174275 | Unassigned | Unassigned | Unassigned | 8_0    | Clustered           | 58 VC_8_0    | 58  | 0.8306 | 1          | 0.8306 | 0 | 0 | 0 | 0.9946 Ref |
| JX181822 | Unassigned | Unassigned | Unassigned | 329_1  | Clustered           | 17 VC_329_1  | 17  | 0.0867 | 1          | 0.0867 | 0 | 0 | 0 | 0.8235 Ref |
| JX181824 | Unassigned | Unassigned | Unassigned | 582_5  | Clustered           | 4 VC_582_5   | 4   | 0.0528 | 0.99935625 | 0.0527 | 0 | 0 | 0 | 0.8333 Ref |



|          |            |            |            |        |                     |              |     |        |            |        |   |   |   |        |     |
|----------|------------|------------|------------|--------|---------------------|--------------|-----|--------|------------|--------|---|---|---|--------|-----|
| JX181828 | Unassigned | Unassigned | Unassigned | 133_22 | Clustered           | 13 VC_133_22 | 13  | 0.0804 | 1          | 0.0804 | 0 | 0 | 0 | 0.8205 | Ref |
| JX181829 | Unassigned | Unassigned | Unassigned | 131_2  | Clustered           | 7 VC_131_2   | 7   | 0.0685 | 1          | 0.0685 | 0 | 0 | 0 | 0.9048 | Ref |
| JX182369 | Unassigned | Unassigned | Unassigned | 981_0  | Clustered           | 3 VC_981_0   | 3   | 0.0531 | 0.99853685 | 0.053  | 0 | 0 | 0 | 1      | Ref |
| JX182370 | Unassigned | Unassigned | Unassigned | 981_1  | Clustered           | 26 VC_981_1  | 26  | 0.7009 | 1          | 0.7009 | 0 | 0 | 0 | 1      | Ref |
| JX182371 | Unassigned | Unassigned | Unassigned | 727_0  | Clustered           | 11 VC_727_0  | 11  | 0.5054 | 1          | 0.5054 | 0 | 0 | 0 | 1      | Ref |
| JX182372 | Unassigned | Unassigned | Unassigned | 373_0  | Clustered           | 10 VC_373_0  | 10  | 0.7471 | 1          | 0.7471 | 0 | 0 | 0 | 1      | Ref |
| JX193904 | Unassigned | Unassigned | Unassigned | 695_0  | Clustered           | 48 VC_695_0  | 48  | 0.8162 | 1          | 0.8162 | 0 | 0 | 0 | 1      | Ref |
| JX194238 | Unassigned | Unassigned | Unassigned | 838_0  | Clustered           | 29 VC_838_0  | 29  | 0.8611 | 1          | 0.8611 | 0 | 0 | 0 | 1      | Ref |
| JX194239 | Unassigned | Unassigned | Unassigned | 153_0  | Clustered           | 25 VC_153_0  | 25  | 0.7729 | 1          | 0.7729 | 0 | 0 | 0 | 1      | Ref |
| JX202565 | Unassigned | Unassigned | Unassigned | 637_0  | Clustered           | 115 VC_637_0 | 115 | 0.731  | 1          | 0.731  | 0 | 0 | 0 | 0.8764 | Ref |
| JX233784 | Unassigned | Unassigned | Unassigned | 344_0  | Clustered           | 21 VC_344_0  | 21  | 0.5436 | 1          | 0.5436 | 0 | 0 | 0 | 1      | Ref |
| JX238501 | Unassigned | Unassigned | Unassigned | 85_6   | Clustered/Singleton | 1 VC_85_6    | 1   | 0      | 1          | 0      | 0 | 0 | 0 | 1      | Ref |
| JX262215 | Unassigned | Unassigned | Unassigned | 765_0  | Clustered           | 132 VC_765_0 | 132 | 1      | 1          | 1      | 0 | 0 | 0 | 1      | Ref |
| JX262216 | Unassigned | Unassigned | Unassigned | 765_0  | Clustered           | 132 VC_765_0 | 132 | 1      | 1          | 1      | 0 | 0 | 0 | 1      | Ref |
| JX262217 | Unassigned | Unassigned | Unassigned | 765_0  | Clustered           | 132 VC_765_0 | 132 | 1      | 1          | 1      | 0 | 0 | 0 | 1      | Ref |
| JX262218 | Unassigned | Unassigned | Unassigned | 765_0  | Clustered           | 132 VC_765_0 | 132 | 1      | 1          | 1      | 0 | 0 | 0 | 1      | Ref |
| JX262219 | Unassigned | Unassigned | Unassigned | 765_0  | Clustered           | 132 VC_765_0 | 132 | 1      | 1          | 1      | 0 | 0 | 0 | 1      | Ref |
| JX262220 | Unassigned | Unassigned | Unassigned | 765_0  | Clustered           | 132 VC_765_0 | 132 | 1      | 1          | 1      | 0 | 0 | 0 | 1      | Ref |
| JX262221 | Unassigned | Unassigned | Unassigned | 765_0  | Clustered           | 132 VC_765_0 | 132 | 1      | 1          | 1      | 0 | 0 | 0 | 1      | Ref |
| JX262222 | Unassigned | Unassigned | Unassigned | 765_0  | Clustered           | 132 VC_765_0 | 132 | 1      | 1          | 1      | 0 | 0 | 0 | 1      | Ref |
| JX262223 | Unassigned | Unassigned | Unassigned | 765_0  | Clustered           | 132 VC_765_0 | 132 | 1      | 1          | 1      | 0 | 0 | 0 | 1      | Ref |
| JX262224 | Unassigned | Unassigned | Unassigned | 765_0  | Clustered           | 132 VC_765_0 | 132 | 1      | 1          | 1      | 0 | 0 | 0 | 1      | Ref |
| JX262225 | Unassigned | Unassigned | Unassigned | 765_0  | Clustered           | 132 VC_765_0 | 132 | 1      | 1          | 1      | 0 | 0 | 0 | 1      | Ref |
| JX262376 | Unassigned | Unassigned | Unassigned | 981_1  | Clustered           | 26 VC_981_1  | 26  | 0.7009 | 1          | 0.7009 | 0 | 0 | 0 | 1      | Ref |
| JX274646 | Unassigned | Unassigned | Unassigned | 9_0    | Clustered           | 38 VC_9_0    | 38  | 0.4895 | 1          | 0.4895 | 0 | 0 | 0 | 1      | Ref |
| JX274647 | Unassigned | Unassigned | Unassigned | 9_0    | Clustered           | 38 VC_9_0    | 38  | 0.4895 | 1          | 0.4895 | 0 | 0 | 0 | 1      | Ref |
| JX290549 | Unassigned | Unassigned | Unassigned | 984_0  | Clustered           | 38 VC_984_0  | 38  | 0.9758 | 1          | 0.9758 | 0 | 0 | 0 | 1      | Ref |
| JX296113 | Unassigned | Unassigned | Unassigned | 592_0  | Clustered           | 50 VC_592_0  | 50  | 0.7314 | 1          | 0.7314 | 0 | 0 | 0 | 1      | Ref |
| JX297445 | Unassigned | Unassigned | Unassigned | 637_1  | Clustered           | 27 VC_637_1  | 27  | 0.2578 | 1          | 0.2578 | 0 | 0 | 0 | 0.9858 | Ref |
| JX306041 | Unassigned | Unassigned | Unassigned | 600_2  | Clustered           | 10 VC_600_2  | 10  | 0.3041 | 1          | 0.3041 | 0 | 0 | 0 | 1      | Ref |
| JX307702 | Unassigned | Unassigned | Unassigned | 517_1  | Clustered           | 108 VC_517_1 | 108 | 0.8483 | 1          | 0.8483 | 0 | 0 | 0 | 0.9955 | Ref |
| JX307703 | Unassigned | Unassigned | Unassigned | 517_1  | Clustered           | 108 VC_517_1 | 108 | 0.8483 | 1          | 0.8483 | 0 | 0 | 0 | 0.9955 | Ref |
| JX307704 | Unassigned | Unassigned | Unassigned | 515_0  | Clustered           | 16 VC_515_0  | 16  | 0.3793 | 1          | 0.3793 | 0 | 0 | 0 | 1      | Ref |
| JX307705 | Unassigned | Unassigned | Unassigned | 325_42 | Clustered           | 4 VC_325_42  | 4   | 0.0112 | 0.99980442 | 0.0112 | 0 | 0 | 0 | 0.6667 | Ref |
| JX316028 | Unassigned | Unassigned | Unassigned | 959_4  | Clustered           | 3 VC_959_4   | 3   | 0.0237 | 0.77138817 | 0.0183 | 0 | 0 | 0 | 1      | Ref |
| JX403939 | Unassigned | Unassigned | Unassigned | 297_1  | Clustered           | 20 VC_297_1  | 20  | 0.5653 | 1          | 0.5653 | 0 | 0 | 0 | 0.7684 | Ref |
| JX403940 | Unassigned | Unassigned | Unassigned | 696_1  | Clustered           | 8 VC_696_1   | 8   | 0.5452 | 1          | 0.5452 | 0 | 0 | 0 | 0.9286 | Ref |
| JX411619 | Unassigned | Unassigned | Unassigned | 515_0  | Clustered           | 16 VC_515_0  | 16  | 0.3793 | 1          | 0.3793 | 0 | 0 | 0 | 1      | Ref |
| JX412914 | Unassigned | Unassigned | Unassigned | 61_0   | Clustered           | 12 VC_61_0   | 12  | 0.7633 | 1          | 0.7633 | 0 | 0 | 0 | 1      | Ref |
| JX415535 | Unassigned | Unassigned | Unassigned | 779_0  | Clustered           | 37 VC_779_0  | 37  | 0.5682 | 1          | 0.5682 | 0 | 0 | 0 | 1      | Ref |
| JX415536 | Unassigned | Unassigned | Unassigned | 813_0  | Clustered           | 12 VC_813_0  | 12  | 0.2347 | 1          | 0.2347 | 0 | 0 | 0 | 1      | Ref |
| JX421753 | Unassigned | Unassigned | Unassigned | 385_0  | Clustered           | 51 VC_385_0  | 51  | 0.8754 | 1          | 0.8754 | 0 | 0 | 0 | 1      | Ref |
| JX434030 | Unassigned | Unassigned | Unassigned | 179_0  | Clustered           | 53 VC_179_0  | 53  | 0.9137 | 1          | 0.9137 | 0 | 0 | 0 | 1      | Ref |
| JX434031 | Unassigned | Unassigned | Unassigned | 179_0  | Clustered           | 53 VC_179_0  | 53  | 0.9137 | 1          | 0.9137 | 0 | 0 | 0 | 1      | Ref |
| JX434032 | Unassigned | Unassigned | Unassigned | 179_0  | Clustered           | 53 VC_179_0  | 53  | 0.9137 | 1          | 0.9137 | 0 | 0 | 0 | 1      | Ref |
| JX434033 | Unassigned | Unassigned | Unassigned | 179_0  | Clustered           | 53 VC_179_0  | 53  | 0.9137 | 1          | 0.9137 | 0 | 0 | 0 | 1      | Ref |
| JX442241 | Unassigned | Unassigned | Unassigned | 980_0  | Clustered           | 10 VC_980_0  | 10  | 0.9996 | 1          | 0.9996 | 0 | 0 | 0 | 1      | Ref |
| JX483873 | Unassigned | Unassigned | Unassigned | 481_0  | Clustered           | 8 VC_481_0   | 8   | 0.1348 | 1          | 0.1348 | 0 | 0 | 0 | 1      | Ref |
| JX483874 | Unassigned | Unassigned | Unassigned | 987_0  | Clustered           | 22 VC_987_0  | 22  | 0.8955 | 1          | 0.8955 | 0 | 0 | 0 | 1      | Ref |
| JX483875 | Unassigned | Unassigned | Unassigned | 987_0  | Clustered           | 22 VC_987_0  | 22  | 0.8955 | 1          | 0.8955 | 0 | 0 | 0 | 1      | Ref |
| JX483876 | Unassigned | Unassigned | Unassigned | 946_0  | Clustered           | 11 VC_946_0  | 11  | 0.7352 | 1          | 0.7352 | 0 | 0 | 0 | 1      | Ref |
| JX483877 | Unassigned | Unassigned | Unassigned | 946_0  | Clustered           | 11 VC_946_0  | 11  | 0.7352 | 1          | 0.7352 | 0 | 0 | 0 | 1      | Ref |
| JX483878 | Unassigned | Unassigned | Unassigned | 946_0  | Clustered           | 11 VC_946_0  | 11  | 0.7352 | 1          | 0.7352 | 0 | 0 | 0 | 1      | Ref |
| JX483879 | Unassigned | Unassigned | Unassigned | 987_0  | Clustered           | 22 VC_987_0  | 22  | 0.8955 | 1          | 0.8955 | 0 | 0 | 0 | 1      | Ref |
| JX483880 | Unassigned | Unassigned | Unassigned | 987_0  | Clustered           | 22 VC_987_0  | 22  | 0.8955 | 1          | 0.8955 | 0 | 0 | 0 | 1      | Ref |
| JX483881 | Unassigned | Unassigned | Unassigned | 724_1  | Clustered           | 6 VC_724_1   | 6   | 0.4379 | 1          | 0.4379 | 0 | 0 | 0 | 1      | Ref |
| JX486087 | Unassigned | Unassigned | Unassigned | 577_0  | Clustered           | 6 VC_577_0   | 6   | 0.9267 | 0.99999993 | 0.9267 | 0 | 0 | 0 | 1      | Ref |
| JX486088 | Unassigned | Unassigned | Unassigned | 634_1  | Clustered           | 6 VC_634_1   | 6   | 0.4228 | 1          | 0.4228 | 0 | 0 | 0 | 1      | Ref |
| JX495041 | Unassigned | Unassigned | Unassigned | 251_0  | Clustered           | 22 VC_251_0  | 22  | 0.6508 | 1          | 0.6508 | 0 | 0 | 0 | 1      | Ref |
| JX495042 | Unassigned | Unassigned | Unassigned | 251_0  | Clustered           | 22 VC_251_0  | 22  | 0.6508 | 1          | 0.6508 | 0 | 0 | 0 | 1      | Ref |
| JX495043 | Unassigned | Unassigned | Unassigned | 251_0  | Clustered           | 22 VC_251_0  | 22  | 0.6508 | 1          | 0.6508 | 0 | 0 | 0 | 1      | Ref |
| JX501340 | Unassigned | Unassigned | Unassigned | 423_0  | Clustered           | 45 VC_423_0  | 45  | 0.9484 | 1          | 0.9484 | 0 | 0 | 0 | 1      | Ref |
| JX507079 | Unassigned | Unassigned | Unassigned | 24_0   | Clustered           | 3 VC_24_0    | 3   | 0.3455 | 0.99844825 | 0.345  | 0 | 0 | 0 | 1      | Ref |
| JX536493 | Unassigned | Unassigned | Unassigned | 286_14 | Clustered/Singleton | 1 VC_286_14  | 1   | 0      | 1          | 0      | 0 | 0 | 0 | 1      | Ref |
| JX556417 | Unassigned | Unassigned | Unassigned | 23_0   | Clustered           | 3 VC_23_0    | 3   | 0.4305 | 0.99837378 | 0.4298 | 0 | 0 | 0 | 1      | Ref |
| JX556418 | Unassigned | Unassigned | Unassigned | 882_0  | Clustered           | 20 VC_882_0  | 20  | 0.9917 | 1          | 0.9917 | 0 | 0 | 0 | 1      | Ref |
| JX560968 | Unassigned | Unassigned | Unassigned | 329_18 | Clustered           | 7 VC_329_18  | 7   | 0.0328 | 1          | 0.0328 | 0 | 0 | 0 | 0.8095 | Ref |
| JX561091 | Unassigned | Unassigned | Unassigned | 847_1  | Clustered           | 26 VC_847_1  | 26  | 0.6323 | 1          | 0.6323 | 0 | 0 | 0 | 0.9815 | Ref |
| JX564242 | Unassigned | Unassigned | Unassigned | 268_0  | Clustered           | 7 VC_268_0   | 7   | 0.3427 | 1          | 0.3427 | 0 | 0 | 0 | 1      | Ref |
| JX567312 | Unassigned | Unassigned | Unassigned | 268_0  | Clustered           | 7 VC_268_0   | 7   | 0.3427 | 1          | 0.3427 | 0 | 0 | 0 | 1      | Ref |
| JX569801 | Unassigned | Unassigned | Unassigned | 844_0  | Clustered           | 27 VC_844_0  | 27  | 0.9385 | 1          | 0.9385 | 0 | 0 | 0 | 1      | Ref |
| JX570702 | Unassigned | Unassigned | Unassigned | 765_0  | Clustered           | 132 VC_765_0 | 132 | 1      | 1          | 1      | 0 | 0 | 0 | 1      | Ref |
| JX570703 | Unassigned | Unassigned | Unassigned | 765_0  | Clustered           | 132 VC_765_0 | 132 | 1      | 1          | 1      | 0 | 0 | 0 | 1      | Ref |
| JX570704 | Unassigned | Unassigned | Unassigned | 765_0  | Clustered           | 132 VC_765_0 | 132 | 1      | 1          | 1      | 0 | 0 | 0 | 1      | Ref |
| JX570705 | Unassigned | Unassigned | Unassigned | 765_0  | Clustered           | 132 VC_765_0 | 132 | 1      | 1          | 1      | 0 | 0 | 0 | 1      | Ref |
| JX570706 | Unassigned | Unassigned | Unassigned | 765_0  | Clustered           | 132 VC_765_0 | 132 | 1      | 1          | 1      | 0 | 0 | 0 | 1      | Ref |
| JX570707 | Unassigned | Unassigned | Unassigned | 765_0  | Clustered           | 132 VC_765_0 | 132 | 1      | 1          | 1      | 0 | 0 | 0 | 1      | Ref |
| JX570708 | Unassigned | Unassigned | Unassigned | 765_0  | Clustered           | 132 VC_765_0 | 132 | 1      | 1          | 1      | 0 | 0 | 0 | 1      | Ref |
| JX570709 | Unassigned | Unassigned | Unassigned | 765_0  | Clustered           | 132 VC_765_0 | 132 | 1      | 1          | 1      | 0 | 0 | 0 | 1      | Ref |
| JX570710 | Unassigned | Unassigned | Unassigned | 765_0  | Clustered           | 132 VC_765_0 | 132 | 1      | 1          | 1      | 0 | 0 | 0 | 1      | Ref |
| JX570711 | Unassigned | Unassigned | Unassigned | 765_0  | Clustered           | 132 VC_765_0 | 132 | 1      | 1          | 1      | 0 | 0 | 0 | 1      | Ref |



|          |            |            |            |        |           |              |     |        |            |        |   |   |   |            |
|----------|------------|------------|------------|--------|-----------|--------------|-----|--------|------------|--------|---|---|---|------------|
| JX570712 | Unassigned | Unassigned | Unassigned | 765_0  | Clustered | 132 VC_765_0 | 132 | 1      | 1          | 1      | 0 | 0 | 0 | 1 Ref      |
| JX570713 | Unassigned | Unassigned | Unassigned | 765_0  | Clustered | 132 VC_765_0 | 132 | 1      | 1          | 1      | 0 | 0 | 0 | 1 Ref      |
| JX570714 | Unassigned | Unassigned | Unassigned | 765_0  | Clustered | 132 VC_765_0 | 132 | 1      | 1          | 1      | 0 | 0 | 0 | 1 Ref      |
| JX625144 | Unassigned | Unassigned | Unassigned | 314_0  | Clustered | 2 VC_314_0   | 2   | 0.1808 | 0.99999983 | 0.1808 | 0 | 0 | 0 | 1 Ref      |
| JX649096 | Unassigned | Unassigned | Unassigned | 371_16 | Clustered | 42 VC_371_16 | 42  | 0.1341 | 1          | 0.1341 | 0 | 0 | 0 | 0.7282 Ref |
| JX649097 | Unassigned | Unassigned | Unassigned | 371_16 | Clustered | 42 VC_371_16 | 42  | 0.1341 | 1          | 0.1341 | 0 | 0 | 0 | 0.7282 Ref |
| JX649098 | Unassigned | Unassigned | Unassigned | 371_3  | Clustered | 22 VC_371_3  | 22  | 0.0787 | 1          | 0.0787 | 0 | 0 | 0 | 0.9048 Ref |
| JX649099 | Unassigned | Unassigned | Unassigned | 371_3  | Clustered | 22 VC_371_3  | 22  | 0.0787 | 1          | 0.0787 | 0 | 0 | 0 | 0.9048 Ref |
| JX649100 | Unassigned | Unassigned | Unassigned | 371_16 | Clustered | 42 VC_371_16 | 42  | 0.1341 | 1          | 0.1341 | 0 | 0 | 0 | 0.7282 Ref |
| JX658790 | Unassigned | Unassigned | Unassigned | 699_0  | Clustered | 71 VC_699_0  | 71  | 0.9352 | 1          | 0.9352 | 0 | 0 | 0 | 1 Ref      |
| JX681814 | Unassigned | Unassigned | Unassigned | 3_0    | Clustered | 17 VC_3_0    | 17  | 0.5639 | 1          | 0.5639 | 0 | 0 | 0 | 1 Ref      |
| JX846612 | Unassigned | Unassigned | Unassigned | 153_0  | Clustered | 25 VC_153_0  | 25  | 0.7729 | 1          | 0.7729 | 0 | 0 | 0 | 1 Ref      |
| JX846613 | Unassigned | Unassigned | Unassigned | 153_0  | Clustered | 25 VC_153_0  | 25  | 0.7729 | 1          | 0.7729 | 0 | 0 | 0 | 1 Ref      |
| JX863101 | Unassigned | Unassigned | Unassigned | 472_0  | Clustered | 47 VC_472_0  | 47  | 0.9025 | 1          | 0.9025 | 0 | 0 | 0 | 1 Ref      |
| JX865427 | Unassigned | Unassigned | Unassigned | 835_0  | Clustered | 67 VC_835_0  | 67  | 0.9624 | 1          | 0.9624 | 0 | 0 | 0 | 1 Ref      |
| JX866719 | Unassigned | Unassigned | Unassigned | 123_0  | Clustered | 23 VC_123_0  | 23  | 0.817  | 1          | 0.817  | 0 | 0 | 0 | 1 Ref      |
| JX867715 | Unassigned | Unassigned | Unassigned | 813_1  | Clustered | 24 VC_813_1  | 24  | 0.535  | 1          | 0.535  | 0 | 0 | 0 | 1 Ref      |
| JX872508 | Unassigned | Unassigned | Unassigned | 392_0  | Clustered | 126 VC_392_0 | 126 | 0.9621 | 1          | 0.9621 | 0 | 0 | 0 | 1 Ref      |
| JX875065 | Unassigned | Unassigned | Unassigned | 149_8  | Clustered | 66 VC_149_8  | 66  | 0.4565 | 1          | 0.4565 | 0 | 0 | 0 | 0.8182 Ref |
| JX878496 | Unassigned | Unassigned | Unassigned | 132_0  | Clustered | 4 VC_132_0   | 4   | 0.036  | 0.99998777 | 0.036  | 0 | 0 | 0 | 1 Ref      |
| JX878671 | Unassigned | Unassigned | Unassigned | 149_13 | Clustered | 3 VC_149_13  | 3   | 0.0087 | 0.95178903 | 0.0083 | 0 | 0 | 0 | 1 Ref      |
| JX879087 | Unassigned | Unassigned | Unassigned | 412_0  | Clustered | 39 VC_412_0  | 39  | 0.845  | 1          | 0.845  | 0 | 0 | 0 | 1 Ref      |
| JX880034 | Unassigned | Unassigned | Unassigned | 779_0  | Clustered | 37 VC_779_0  | 37  | 0.5682 | 1          | 0.5682 | 0 | 0 | 0 | 1 Ref      |
| JX880072 | Unassigned | Unassigned | Unassigned | 117_0  | Clustered | 9 VC_117_0   | 9   | 0.9977 | 0.98988637 | 0.9876 | 0 | 0 | 0 | 1 Ref      |
| JX887877 | Unassigned | Unassigned | Unassigned | 829_0  | Clustered | 5 VC_829_0   | 5   | 0.8821 | 0.99999832 | 0.8821 | 0 | 0 | 0 | 1 Ref      |
| JX889246 | Unassigned | Unassigned | Unassigned | 982_0  | Clustered | 62 VC_982_0  | 62  | 0.8646 | 1          | 0.8646 | 0 | 0 | 0 | 0.743 Ref  |
| JX899358 | Unassigned | Unassigned | Unassigned | 216_6  | Clustered | 42 VC_216_6  | 42  | 0.473  | 1          | 0.473  | 0 | 0 | 0 | 0.8351 Ref |
| JX901189 | Unassigned | Unassigned | Unassigned | 574_0  | Clustered | 7 VC_574_0   | 7   | 0.2734 | 1          | 0.2734 | 0 | 0 | 0 | 1 Ref      |
| JX912252 | Unassigned | Unassigned | Unassigned | 575_0  | Clustered | 35 VC_575_0  | 35  | 0.8815 | 1          | 0.8815 | 0 | 0 | 0 | 1 Ref      |
| JX976549 | Unassigned | Unassigned | Unassigned | 698_0  | Clustered | 26 VC_698_0  | 26  | 0.9366 | 1          | 0.9366 | 0 | 0 | 0 | 1 Ref      |
| JX997978 | Unassigned | Unassigned | Unassigned | 423_0  | Clustered | 45 VC_423_0  | 45  | 0.9484 | 1          | 0.9484 | 0 | 0 | 0 | 1 Ref      |
| KC012913 | Unassigned | Unassigned | Unassigned | 149_8  | Clustered | 66 VC_149_8  | 66  | 0.4565 | 1          | 0.4565 | 0 | 0 | 0 | 0.8182 Ref |
| KC013021 | Unassigned | Unassigned | Unassigned | 861_0  | Clustered | 9 VC_861_0   | 9   | 0.5869 | 1          | 0.5869 | 0 | 0 | 0 | 1 Ref      |
| KC013022 | Unassigned | Unassigned | Unassigned | 861_0  | Clustered | 9 VC_861_0   | 9   | 0.5869 | 1          | 0.5869 | 0 | 0 | 0 | 1 Ref      |
| KC013023 | Unassigned | Unassigned | Unassigned | 861_0  | Clustered | 9 VC_861_0   | 9   | 0.5869 | 1          | 0.5869 | 0 | 0 | 0 | 1 Ref      |
| KC013024 | Unassigned | Unassigned | Unassigned | 861_0  | Clustered | 9 VC_861_0   | 9   | 0.5869 | 1          | 0.5869 | 0 | 0 | 0 | 1 Ref      |
| KC013025 | Unassigned | Unassigned | Unassigned | 861_0  | Clustered | 9 VC_861_0   | 9   | 0.5869 | 1          | 0.5869 | 0 | 0 | 0 | 1 Ref      |
| KC013026 | Unassigned | Unassigned | Unassigned | 862_0  | Clustered | 11 VC_862_0  | 11  | 0.6745 | 1          | 0.6745 | 0 | 0 | 0 | 1 Ref      |
| KC013027 | Unassigned | Unassigned | Unassigned | 862_0  | Clustered | 11 VC_862_0  | 11  | 0.6745 | 1          | 0.6745 | 0 | 0 | 0 | 1 Ref      |
| KC013028 | Unassigned | Unassigned | Unassigned | 862_0  | Clustered | 11 VC_862_0  | 11  | 0.6745 | 1          | 0.6745 | 0 | 0 | 0 | 1 Ref      |
| KC013029 | Unassigned | Unassigned | Unassigned | 862_0  | Clustered | 11 VC_862_0  | 11  | 0.6745 | 1          | 0.6745 | 0 | 0 | 0 | 1 Ref      |
| KC107834 | Unassigned | Unassigned | Unassigned | 878_0  | Clustered | 32 VC_878_0  | 32  | 0.9965 | 1          | 0.9965 | 0 | 0 | 0 | 1 Ref      |
| KC109329 | Unassigned | Unassigned | Unassigned | 451_0  | Clustered | 80 VC_451_0  | 80  | 0.9991 | 1          | 0.9991 | 0 | 0 | 0 | 1 Ref      |
| KC117376 | Unassigned | Unassigned | Unassigned | 311_0  | Clustered | 6 VC_311_0   | 6   | 0.1997 | 1          | 0.1997 | 0 | 0 | 0 | 1 Ref      |
| KC117377 | Unassigned | Unassigned | Unassigned | 313_1  | Clustered | 3 VC_313_1   | 3   | 0.3511 | 0.99802018 | 0.3504 | 0 | 0 | 0 | 1 Ref      |
| KC131021 | Unassigned | Unassigned | Unassigned | 199_0  | Clustered | 12 VC_199_0  | 12  | 0.448  | 1          | 0.448  | 0 | 0 | 0 | 1 Ref      |
| KC131022 | Unassigned | Unassigned | Unassigned | 995_0  | Clustered | 69 VC_995_0  | 69  | 0.8547 | 1          | 0.8547 | 0 | 0 | 0 | 1 Ref      |
| KC131023 | Unassigned | Unassigned | Unassigned | 403_0  | Clustered | 20 VC_403_0  | 20  | 0.6598 | 1          | 0.6598 | 0 | 0 | 0 | 1 Ref      |
| KC131025 | Unassigned | Unassigned | Unassigned | 403_0  | Clustered | 20 VC_403_0  | 20  | 0.6598 | 1          | 0.6598 | 0 | 0 | 0 | 1 Ref      |
| KC131129 | Unassigned | Unassigned | Unassigned | 531_0  | Clustered | 9 VC_531_0   | 9   | 0.26   | 1          | 0.26   | 0 | 0 | 0 | 1 Ref      |
| KC139511 | Unassigned | Unassigned | Unassigned | 637_0  | Clustered | 115 VC_637_0 | 115 | 0.731  | 1          | 0.731  | 0 | 0 | 0 | 0.8764 Ref |
| KC139512 | Unassigned | Unassigned | Unassigned | 592_0  | Clustered | 50 VC_592_0  | 50  | 0.7314 | 1          | 0.7314 | 0 | 0 | 0 | 1 Ref      |
| KC139514 | Unassigned | Unassigned | Unassigned | 592_0  | Clustered | 50 VC_592_0  | 50  | 0.7314 | 1          | 0.7314 | 0 | 0 | 0 | 1 Ref      |
| KC139515 | Unassigned | Unassigned | Unassigned | 592_0  | Clustered | 50 VC_592_0  | 50  | 0.7314 | 1          | 0.7314 | 0 | 0 | 0 | 1 Ref      |
| KC139517 | Unassigned | Unassigned | Unassigned | 780_0  | Clustered | 8 VC_780_0   | 8   | 0.5207 | 1          | 0.5207 | 0 | 0 | 0 | 1 Ref      |
| KC139518 | Unassigned | Unassigned | Unassigned | 540_0  | Clustered | 15 VC_540_0  | 15  | 0.2866 | 1          | 0.2866 | 0 | 0 | 0 | 1 Ref      |
| KC139519 | Unassigned | Unassigned | Unassigned | 592_0  | Clustered | 50 VC_592_0  | 50  | 0.7314 | 1          | 0.7314 | 0 | 0 | 0 | 1 Ref      |
| KC139520 | Unassigned | Unassigned | Unassigned | 780_0  | Clustered | 8 VC_780_0   | 8   | 0.5207 | 1          | 0.5207 | 0 | 0 | 0 | 1 Ref      |
| KC139521 | Unassigned | Unassigned | Unassigned | 228_0  | Clustered | 60 VC_228_0  | 60  | 0.942  | 1          | 0.942  | 0 | 0 | 0 | 1 Ref      |
| KC171646 | Unassigned | Unassigned | Unassigned | 272_0  | Clustered | 11 VC_272_0  | 11  | 0.4915 | 1          | 0.4915 | 0 | 0 | 0 | 0.8727 Ref |
| KC171647 | Unassigned | Unassigned | Unassigned | 272_0  | Clustered | 11 VC_272_0  | 11  | 0.4915 | 1          | 0.4915 | 0 | 0 | 0 | 0.8727 Ref |
| KC172839 | Unassigned | Unassigned | Unassigned | 513_0  | Clustered | 32 VC_513_0  | 32  | 0.6881 | 1          | 0.6881 | 0 | 0 | 0 | 1 Ref      |
| KC182542 | Unassigned | Unassigned | Unassigned | 202_0  | Clustered | 102 VC_202_0 | 102 | 0.4049 | 1          | 0.4049 | 0 | 0 | 0 | 0.7876 Ref |
| KC182543 | Unassigned | Unassigned | Unassigned | 202_0  | Clustered | 102 VC_202_0 | 102 | 0.4049 | 1          | 0.4049 | 0 | 0 | 0 | 0.7876 Ref |
| KC182544 | Unassigned | Unassigned | Unassigned | 202_0  | Clustered | 102 VC_202_0 | 102 | 0.4049 | 1          | 0.4049 | 0 | 0 | 0 | 0.7876 Ref |
| KC182545 | Unassigned | Unassigned | Unassigned | 202_0  | Clustered | 102 VC_202_0 | 102 | 0.4049 | 1          | 0.4049 | 0 | 0 | 0 | 0.7876 Ref |
| KC182546 | Unassigned | Unassigned | Unassigned | 202_0  | Clustered | 102 VC_202_0 | 102 | 0.4049 | 1          | 0.4049 | 0 | 0 | 0 | 0.7876 Ref |
| KC182547 | Unassigned | Unassigned | Unassigned | 202_0  | Clustered | 102 VC_202_0 | 102 | 0.4049 | 1          | 0.4049 | 0 | 0 | 0 | 0.7876 Ref |
| KC182548 | Unassigned | Unassigned | Unassigned | 202_0  | Clustered | 102 VC_202_0 | 102 | 0.4049 | 1          | 0.4049 | 0 | 0 | 0 | 0.7876 Ref |
| KC182549 | Unassigned | Unassigned | Unassigned | 202_0  | Clustered | 102 VC_202_0 | 102 | 0.4049 | 1          | 0.4049 | 0 | 0 | 0 | 0.7876 Ref |
| KC182550 | Unassigned | Unassigned | Unassigned | 202_0  | Clustered | 102 VC_202_0 | 102 | 0.4049 | 1          | 0.4049 | 0 | 0 | 0 | 0.7876 Ref |
| KC182551 | Unassigned | Unassigned | Unassigned | 202_0  | Clustered | 102 VC_202_0 | 102 | 0.4049 | 1          | 0.4049 | 0 | 0 | 0 | 0.7876 Ref |
| KC182552 | Unassigned | Unassigned | Unassigned | 202_0  | Clustered | 102 VC_202_0 | 102 | 0.4049 | 1          | 0.4049 | 0 | 0 | 0 | 0.7876 Ref |
| KC206276 | Unassigned | Unassigned | Unassigned | 779_0  | Clustered | 37 VC_779_0  | 37  | 0.5682 | 1          | 0.5682 | 0 | 0 | 0 | 1 Ref      |
| KC237308 | Unassigned | Unassigned | Unassigned | 362_0  | Clustered | 2 VC_362_0   | 2   | 0.002  | 0.83307735 | 0.0017 | 0 | 0 | 0 | 1 Ref      |
| KC237729 | Unassigned | Unassigned | Unassigned | 417_0  | Clustered | 5 VC_417_0   | 5   | 0.6629 | 0.9977434  | 0.6614 | 0 | 0 | 0 | 0.8 Ref    |
| KC252997 | Unassigned | Unassigned | Unassigned | 666_0  | Clustered | 4 VC_666_0   | 4   | 1      | 1          | 1      | 0 | 0 | 0 | 1 Ref      |
| KC262634 | Unassigned | Unassigned | Unassigned | 630_0  | Clustered | 20 VC_630_0  | 20  | 0.8513 | 1          | 0.8513 | 0 | 0 | 0 | 1 Ref      |
| KC292020 | Unassigned | Unassigned | Unassigned | 310_0  | Clustered | 33 VC_310_0  | 33  | 0.8771 | 1          | 0.8771 | 0 | 0 | 0 | 1 Ref      |
| KC292021 | Unassigned | Unassigned | Unassigned | 311_0  | Clustered | 6 VC_311_0   | 6   | 0.1997 | 1          | 0.1997 | 0 | 0 | 0 | 1 Ref      |
| KC292022 | Unassigned | Unassigned | Unassigned | 310_0  | Clustered | 33 VC_310_0  | 33  | 0.8771 | 1          | 0.8771 | 0 | 0 | 0 | 1 Ref      |



|          |            |            |            |        |                     |              |     |        |            |        |   |   |   |            |
|----------|------------|------------|------------|--------|---------------------|--------------|-----|--------|------------|--------|---|---|---|------------|
| KC292023 | Unassigned | Unassigned | Unassigned | 459_0  | Clustered           | 3 VC_459_0   | 3   | 0.8542 | 0.99054823 | 0.8461 | 0 | 0 | 0 | 1 Ref      |
| KC292024 | Unassigned | Unassigned | Unassigned | 991_0  | Clustered           | 2 VC_991_0   | 2   | 0.3757 | 0.91418477 | 0.3435 | 0 | 0 | 0 | 1 Ref      |
| KC292026 | Unassigned | Unassigned | Unassigned | 312_0  | Clustered           | 2 VC_312_0   | 2   | 0.0307 | 0.95436427 | 0.0293 | 0 | 0 | 0 | 1 Ref      |
| KC292027 | Unassigned | Unassigned | Unassigned | 313_1  | Clustered           | 3 VC_313_1   | 3   | 0.3511 | 0.99802018 | 0.3504 | 0 | 0 | 0 | 1 Ref      |
| KC292028 | Unassigned | Unassigned | Unassigned | 991_0  | Clustered           | 2 VC_991_0   | 2   | 0.3757 | 0.91418477 | 0.3435 | 0 | 0 | 0 | 1 Ref      |
| KC292029 | Unassigned | Unassigned | Unassigned | 313_0  | Clustered           | 2 VC_313_0   | 2   | 0.1721 | 0.90744399 | 0.1562 | 0 | 0 | 0 | 1 Ref      |
| KC294142 | Unassigned | Unassigned | Unassigned | 472_0  | Clustered           | 47 VC_472_0  | 47  | 0.9025 | 1          | 0.9025 | 0 | 0 | 0 | 1 Ref      |
| KC295538 | Unassigned | Unassigned | Unassigned | 164_11 | Clustered           | 10 VC_164_11 | 10  | 0.1507 | 1          | 0.1507 | 0 | 0 | 0 | 0.9111 Ref |
| KC310802 | Unassigned | Unassigned | Unassigned | 340_0  | Clustered           | 31 VC_340_0  | 31  | 0.9549 | 1          | 0.9549 | 0 | 0 | 0 | 1 Ref      |
| KC310803 | Unassigned | Unassigned | Unassigned | 340_0  | Clustered           | 31 VC_340_0  | 31  | 0.9549 | 1          | 0.9549 | 0 | 0 | 0 | 1 Ref      |
| KC310804 | Unassigned | Unassigned | Unassigned | 340_0  | Clustered           | 31 VC_340_0  | 31  | 0.9549 | 1          | 0.9549 | 0 | 0 | 0 | 1 Ref      |
| KC310805 | Unassigned | Unassigned | Unassigned | 340_0  | Clustered           | 31 VC_340_0  | 31  | 0.9549 | 1          | 0.9549 | 0 | 0 | 0 | 1 Ref      |
| KC310806 | Unassigned | Unassigned | Unassigned | 340_0  | Clustered           | 31 VC_340_0  | 31  | 0.9549 | 1          | 0.9549 | 0 | 0 | 0 | 1 Ref      |
| KC311669 | Unassigned | Unassigned | Unassigned | 699_0  | Clustered           | 71 VC_699_0  | 71  | 0.9352 | 1          | 0.9352 | 0 | 0 | 0 | 1 Ref      |
| KC330679 | Unassigned | Unassigned | Unassigned | 100_0  | Clustered           | 15 VC_100_0  | 15  | 0.6536 | 1          | 0.6536 | 0 | 0 | 0 | 1 Ref      |
| KC330680 | Unassigned | Unassigned | Unassigned | 100_0  | Clustered           | 15 VC_100_0  | 15  | 0.6536 | 1          | 0.6536 | 0 | 0 | 0 | 1 Ref      |
| KC330681 | Unassigned | Unassigned | Unassigned | 100_0  | Clustered           | 15 VC_100_0  | 15  | 0.6536 | 1          | 0.6536 | 0 | 0 | 0 | 1 Ref      |
| KC330682 | Unassigned | Unassigned | Unassigned | 100_0  | Clustered           | 15 VC_100_0  | 15  | 0.6536 | 1          | 0.6536 | 0 | 0 | 0 | 1 Ref      |
| KC330683 | Unassigned | Unassigned | Unassigned | 100_0  | Clustered           | 15 VC_100_0  | 15  | 0.6536 | 1          | 0.6536 | 0 | 0 | 0 | 1 Ref      |
| KC330684 | Unassigned | Unassigned | Unassigned | 100_0  | Clustered           | 15 VC_100_0  | 15  | 0.6536 | 1          | 0.6536 | 0 | 0 | 0 | 1 Ref      |
| KC333879 | Unassigned | Unassigned | Unassigned | 455_0  | Clustered           | 18 VC_455_0  | 18  | 0.4598 | 1          | 0.4598 | 0 | 0 | 0 | 1 Ref      |
| KC342645 | Unassigned | Unassigned | Unassigned | 7_0    | Clustered           | 28 VC_7_0    | 28  | 0.3916 | 1          | 0.3916 | 0 | 0 | 0 | 0.9947 Ref |
| KC348600 | Unassigned | Unassigned | Unassigned | 317_2  | Clustered           | 20 VC_317_2  | 20  | 0.1976 | 1          | 0.1976 | 0 | 0 | 0 | 0.6842 Ref |
| KC348601 | Unassigned | Unassigned | Unassigned | 317_2  | Clustered           | 20 VC_317_2  | 20  | 0.1976 | 1          | 0.1976 | 0 | 0 | 0 | 0.6842 Ref |
| KC348602 | Unassigned | Unassigned | Unassigned | 317_2  | Clustered           | 20 VC_317_2  | 20  | 0.1976 | 1          | 0.1976 | 0 | 0 | 0 | 0.6842 Ref |
| KC348603 | Unassigned | Unassigned | Unassigned | 632_0  | Clustered           | 37 VC_632_0  | 37  | 0.581  | 1          | 0.581  | 0 | 0 | 0 | 0.9234 Ref |
| KC357596 | Unassigned | Unassigned | Unassigned | 0_0    | Clustered           | 3 VC_0_0     | 3   | 1      | 1          | 1      | 0 | 0 | 0 | 1 Ref      |
| KC413988 | Unassigned | Unassigned | Unassigned | 412_0  | Clustered           | 39 VC_412_0  | 39  | 0.845  | 1          | 0.845  | 0 | 0 | 0 | 1 Ref      |
| KC430106 | Unassigned | Unassigned | Unassigned | 884_1  | Clustered           | 8 VC_884_1   | 8   | 0.1102 | 0.9989323  | 0.1101 | 0 | 0 | 0 | 0.75 Ref   |
| KC438282 | Unassigned | Unassigned | Unassigned | 784_0  | Clustered           | 6 VC_784_0   | 6   | 0.5517 | 1          | 0.5517 | 0 | 0 | 0 | 1 Ref      |
| KC438283 | Unassigned | Unassigned | Unassigned | 784_0  | Clustered           | 6 VC_784_0   | 6   | 0.5517 | 1          | 0.5517 | 0 | 0 | 0 | 1 Ref      |
| KC465898 | Unassigned | Unassigned | Unassigned | 486_0  | Clustered           | 18 VC_486_0  | 18  | 0.887  | 1          | 0.887  | 0 | 0 | 0 | 1 Ref      |
| KC465901 | Unassigned | Unassigned | Unassigned | 480_0  | Clustered           | 19 VC_480_0  | 19  | 0.5445 | 1          | 0.5445 | 0 | 0 | 0 | 1 Ref      |
| KC481682 | Unassigned | Unassigned | Unassigned | 475_2  | Clustered           | 3 VC_475_2   | 3   | 0.0585 | 0.98833022 | 0.0578 | 0 | 0 | 0 | 1 Ref      |
| KC522412 | Unassigned | Unassigned | Unassigned | 202_0  | Clustered           | 102 VC_202_0 | 102 | 0.4049 | 1          | 0.4049 | 0 | 0 | 0 | 0.7876 Ref |
| KC542353 | Unassigned | Unassigned | Unassigned | 644_0  | Clustered           | 5 VC_644_0   | 5   | 0.6649 | 0.99999975 | 0.6649 | 0 | 0 | 0 | 1 Ref      |
| KC556893 | Unassigned | Unassigned | Unassigned | 879_0  | Clustered           | 36 VC_879_0  | 36  | 0.994  | 1          | 0.994  | 0 | 0 | 0 | 1 Ref      |
| KC556894 | Unassigned | Unassigned | Unassigned | 879_0  | Clustered           | 36 VC_879_0  | 36  | 0.994  | 1          | 0.994  | 0 | 0 | 0 | 1 Ref      |
| KC556895 | Unassigned | Unassigned | Unassigned | 879_0  | Clustered           | 36 VC_879_0  | 36  | 0.994  | 1          | 0.994  | 0 | 0 | 0 | 1 Ref      |
| KC556896 | Unassigned | Unassigned | Unassigned | 879_0  | Clustered           | 36 VC_879_0  | 36  | 0.994  | 1          | 0.994  | 0 | 0 | 0 | 1 Ref      |
| KC556897 | Unassigned | Unassigned | Unassigned | 879_0  | Clustered           | 36 VC_879_0  | 36  | 0.994  | 1          | 0.994  | 0 | 0 | 0 | 1 Ref      |
| KC556898 | Unassigned | Unassigned | Unassigned | 879_0  | Clustered           | 36 VC_879_0  | 36  | 0.994  | 1          | 0.994  | 0 | 0 | 0 | 1 Ref      |
| KC576783 | Unassigned | Unassigned | Unassigned | 521_0  | Clustered           | 37 VC_521_0  | 37  | 0.912  | 1          | 0.912  | 0 | 0 | 0 | 1 Ref      |
| KC576784 | Unassigned | Unassigned | Unassigned | 371_2  | Clustered           | 8 VC_371_2   | 8   | 0.0232 | 1          | 0.0232 | 0 | 0 | 0 | 0.8571 Ref |
| KC579452 | Unassigned | Unassigned | Unassigned | 455_0  | Clustered           | 18 VC_455_0  | 18  | 0.4598 | 1          | 0.4598 | 0 | 0 | 0 | 1 Ref      |
| KC581799 | Unassigned | Unassigned | Unassigned | 632_0  | Clustered           | 37 VC_632_0  | 37  | 0.581  | 1          | 0.581  | 0 | 0 | 0 | 0.9234 Ref |
| KC595278 | Unassigned | Unassigned | Unassigned | 10_0   | Clustered           | 25 VC_10_0   | 25  | 0.3467 | 1          | 0.3467 | 0 | 0 | 0 | 0.9733 Ref |
| KC595279 | Unassigned | Unassigned | Unassigned | 12_2   | Clustered           | 19 VC_12_2   | 19  | 0.2018 | 1          | 0.2018 | 0 | 0 | 0 | 1 Ref      |
| KC595511 | Unassigned | Unassigned | Unassigned | 1006_0 | Clustered           | 8 VC_1006_0  | 8   | 0.7407 | 1          | 0.7407 | 0 | 0 | 0 | 1 Ref      |
| KC595512 | Unassigned | Unassigned | Unassigned | 87_1   | Clustered           | 3 VC_87_1    | 3   | 0.1636 | 0.99777924 | 0.1632 | 0 | 0 | 0 | 1 Ref      |
| KC595513 | Unassigned | Unassigned | Unassigned | 87_1   | Clustered           | 3 VC_87_1    | 3   | 0.1636 | 0.99777924 | 0.1632 | 0 | 0 | 0 | 1 Ref      |
| KC595514 | Unassigned | Unassigned | Unassigned | 141_0  | Clustered           | 6 VC_141_0   | 6   | 0.5999 | 1          | 0.5999 | 0 | 0 | 0 | 1 Ref      |
| KC595515 | Unassigned | Unassigned | Unassigned | 141_0  | Clustered           | 6 VC_141_0   | 6   | 0.5999 | 1          | 0.5999 | 0 | 0 | 0 | 1 Ref      |
| KC595517 | Unassigned | Unassigned | Unassigned | 141_0  | Clustered           | 6 VC_141_0   | 6   | 0.5999 | 1          | 0.5999 | 0 | 0 | 0 | 1 Ref      |
| KC595518 | Unassigned | Unassigned | Unassigned | 141_0  | Clustered           | 6 VC_141_0   | 6   | 0.5999 | 1          | 0.5999 | 0 | 0 | 0 | 1 Ref      |
| KC618326 | Unassigned | Unassigned | Unassigned | 228_0  | Clustered           | 60 VC_228_0  | 60  | 0.942  | 1          | 0.942  | 0 | 0 | 0 | 1 Ref      |
| KC618393 | Unassigned | Unassigned | Unassigned | 599_0  | Clustered           | 50 VC_599_0  | 50  | 0.9989 | 1          | 0.9989 | 0 | 0 | 0 | 1 Ref      |
| KC661271 | Unassigned | Unassigned | Unassigned | 517_1  | Clustered           | 108 VC_517_1 | 108 | 0.8483 | 1          | 0.8483 | 0 | 0 | 0 | 0.9955 Ref |
| KC661272 | Unassigned | Unassigned | Unassigned | 514_0  | Clustered           | 75 VC_514_0  | 75  | 0.9402 | 1          | 0.9402 | 0 | 0 | 0 | 1 Ref      |
| KC661273 | Unassigned | Unassigned | Unassigned | 325_23 | Clustered           | 17 VC_325_23 | 17  | 0.0716 | 1          | 0.0716 | 0 | 0 | 0 | 0.6397 Ref |
| KC661274 | Unassigned | Unassigned | Unassigned | 371_3  | Clustered           | 22 VC_371_3  | 22  | 0.0787 | 1          | 0.0787 | 0 | 0 | 0 | 0.9048 Ref |
| KC661275 | Unassigned | Unassigned | Unassigned | 219_0  | Clustered           | 5 VC_219_0   | 5   | 0.08   | 0.99999998 | 0.08   | 0 | 0 | 0 | 1 Ref      |
| KC661276 | Unassigned | Unassigned | Unassigned | 888_0  | Clustered           | 28 VC_888_0  | 28  | 0.5497 | 1          | 0.5497 | 0 | 0 | 0 | 1 Ref      |
| KC661277 | Unassigned | Unassigned | Unassigned | 551_7  | Clustered           | 28 VC_551_7  | 28  | 0.1661 | 1          | 0.1661 | 0 | 0 | 0 | 0.8519 Ref |
| KC661278 | Unassigned | Unassigned | Unassigned | 520_79 | Clustered/Singleton | 1 VC_520_79  | 1   | 0      | 1          | 0      | 0 | 0 | 0 | 1 Ref      |
| KC661279 | Unassigned | Unassigned | Unassigned | 515_0  | Clustered           | 16 VC_515_0  | 16  | 0.3793 | 1          | 0.3793 | 0 | 0 | 0 | 1 Ref      |
| KC661280 | Unassigned | Unassigned | Unassigned | 520_70 | Clustered/Singleton | 1 VC_520_70  | 1   | 0      | 1          | 0      | 0 | 0 | 0 | 1 Ref      |
| KC661281 | Unassigned | Unassigned | Unassigned | 514_0  | Clustered           | 75 VC_514_0  | 75  | 0.9402 | 1          | 0.9402 | 0 | 0 | 0 | 1 Ref      |
| KC677662 | Unassigned | Unassigned | Unassigned | 592_0  | Clustered           | 50 VC_592_0  | 50  | 0.7314 | 1          | 0.7314 | 0 | 0 | 0 | 1 Ref      |
| KC677663 | Unassigned | Unassigned | Unassigned | 9_0    | Clustered           | 38 VC_9_0    | 38  | 0.4895 | 1          | 0.4895 | 0 | 0 | 0 | 1 Ref      |
| KC685370 | Unassigned | Unassigned | Unassigned | 818_0  | Clustered           | 20 VC_818_0  | 20  | 0.9601 | 1          | 0.9601 | 0 | 0 | 0 | 1 Ref      |
| KC690136 | Unassigned | Unassigned | Unassigned | 772_15 | Clustered           | 5 VC_772_15  | 5   | 0.0243 | 0.76144861 | 0.0185 | 0 | 0 | 0 | 0.9 Ref    |
| KC691254 | Unassigned | Unassigned | Unassigned | 888_0  | Clustered           | 28 VC_888_0  | 28  | 0.5497 | 1          | 0.5497 | 0 | 0 | 0 | 1 Ref      |
| KC691255 | Unassigned | Unassigned | Unassigned | 551_7  | Clustered           | 28 VC_551_7  | 28  | 0.1661 | 1          | 0.1661 | 0 | 0 | 0 | 0.8519 Ref |
| KC691256 | Unassigned | Unassigned | Unassigned | 519_0  | Clustered           | 39 VC_519_0  | 39  | 0.8156 | 1          | 0.8156 | 0 | 0 | 0 | 1 Ref      |
| KC691257 | Unassigned | Unassigned | Unassigned | 558_5  | Clustered/Singleton | 1 VC_558_5   | 1   | 0      | 1          | 0      | 0 | 0 | 0 | 1 Ref      |
| KC691258 | Unassigned | Unassigned | Unassigned | 371_3  | Clustered           | 22 VC_371_3  | 22  | 0.0787 | 1          | 0.0787 | 0 | 0 | 0 | 0.9048 Ref |
| KC699836 | Unassigned | Unassigned | Unassigned | 85_2   | Clustered           | 3 VC_85_2    | 3   | 0.0334 | 0.99730296 | 0.0333 | 0 | 0 | 0 | 1 Ref      |
| KC700556 | Unassigned | Unassigned | Unassigned | 982_0  | Clustered           | 62 VC_982_0  | 62  | 0.8646 | 1          | 0.8646 | 0 | 0 | 0 | 0.743 Ref  |
| KC700557 | Unassigned | Unassigned | Unassigned | 982_0  | Clustered           | 62 VC_982_0  | 62  | 0.8646 | 1          | 0.8646 | 0 | 0 | 0 | 0.743 Ref  |
| KC700558 | Unassigned | Unassigned | Unassigned | 982_0  | Clustered           | 62 VC_982_0  | 62  | 0.8646 | 1          | 0.8646 | 0 | 0 | 0 | 0.743 Ref  |



|          |            |            |            |        |                     |             |    |        |            |        |   |   |   |            |
|----------|------------|------------|------------|--------|---------------------|-------------|----|--------|------------|--------|---|---|---|------------|
| KC701493 | Unassigned | Unassigned | Unassigned | 325_17 | Clustered/Singleton | 1 VC_325_17 | 1  | 0      | 1          | 0      | 0 | 0 | 0 | 1 Ref      |
| KC710998 | Unassigned | Unassigned | Unassigned | 941_0  | Clustered           | 40 VC_941_0 | 40 | 0.6903 | 1          | 0.6903 | 0 | 0 | 0 | 1 Ref      |
| KC736071 | Unassigned | Unassigned | Unassigned | 520_52 | Clustered/Singleton | 1 VC_520_52 | 1  | 0      | 1          | 0      | 0 | 0 | 0 | 1 Ref      |
| KC736978 | Unassigned | Unassigned | Unassigned | 45_0   | Clustered           | 12 VC_45_0  | 12 | 0.35   | 1          | 0.35   | 0 | 0 | 0 | 1 Ref      |
| KC748968 | Unassigned | Unassigned | Unassigned | 558_49 | Clustered           | 7 VC_558_49 | 7  | 0.0194 | 0.99510369 | 0.0193 | 0 | 0 | 0 | 0.8571 Ref |
| KC748969 | Unassigned | Unassigned | Unassigned | 551_8  | Clustered           | 19 VC_551_8 | 19 | 0.1039 | 1          | 0.1039 | 0 | 0 | 0 | 0.8713 Ref |
| KC748970 | Unassigned | Unassigned | Unassigned | 558_12 | Clustered           | 3 VC_558_12 | 3  | 0.0064 | 0.87854253 | 0.0057 | 0 | 0 | 0 | 1 Ref      |
| KC748971 | Unassigned | Unassigned | Unassigned | 551_7  | Clustered           | 28 VC_551_7 | 28 | 0.1661 | 1          | 0.1661 | 0 | 0 | 0 | 0.8519 Ref |
| KC751414 | Unassigned | Unassigned | Unassigned | 756_0  | Clustered           | 2 VC_756_0  | 2  | 0.1637 | 0.95427014 | 0.1562 | 0 | 0 | 0 | 1 Ref      |
| KC758116 | Unassigned | Unassigned | Unassigned | 166_0  | Clustered           | 26 VC_166_0 | 26 | 0.7923 | 1          | 0.7923 | 0 | 0 | 0 | 1 Ref      |
| KC787102 | Unassigned | Unassigned | Unassigned | 215_1  | Clustered           | 19 VC_215_1 | 19 | 0.4188 | 1          | 0.4188 | 0 | 0 | 0 | 1 Ref      |
| KC787103 | Unassigned | Unassigned | Unassigned | 761_0  | Clustered           | 67 VC_761_0 | 67 | 0.8947 | 1          | 0.8947 | 0 | 0 | 0 | 1 Ref      |
| KC787104 | Unassigned | Unassigned | Unassigned | 761_0  | Clustered           | 67 VC_761_0 | 67 | 0.8947 | 1          | 0.8947 | 0 | 0 | 0 | 1 Ref      |
| KC787105 | Unassigned | Unassigned | Unassigned | 215_1  | Clustered           | 19 VC_215_1 | 19 | 0.4188 | 1          | 0.4188 | 0 | 0 | 0 | 1 Ref      |
| KC787106 | Unassigned | Unassigned | Unassigned | 215_1  | Clustered           | 19 VC_215_1 | 19 | 0.4188 | 1          | 0.4188 | 0 | 0 | 0 | 1 Ref      |
| KC787107 | Unassigned | Unassigned | Unassigned | 761_0  | Clustered           | 67 VC_761_0 | 67 | 0.8947 | 1          | 0.8947 | 0 | 0 | 0 | 1 Ref      |
| KC787108 | Unassigned | Unassigned | Unassigned | 761_0  | Clustered           | 67 VC_761_0 | 67 | 0.8947 | 1          | 0.8947 | 0 | 0 | 0 | 1 Ref      |
| KC787109 | Unassigned | Unassigned | Unassigned | 761_0  | Clustered           | 67 VC_761_0 | 67 | 0.8947 | 1          | 0.8947 | 0 | 0 | 0 | 1 Ref      |
| KC787110 | Unassigned | Unassigned | Unassigned | 761_0  | Clustered           | 67 VC_761_0 | 67 | 0.8947 | 1          | 0.8947 | 0 | 0 | 0 | 1 Ref      |
| KC787111 | Unassigned | Unassigned | Unassigned | 761_0  | Clustered           | 67 VC_761_0 | 67 | 0.8947 | 1          | 0.8947 | 0 | 0 | 0 | 1 Ref      |
| KC787112 | Unassigned | Unassigned | Unassigned | 761_0  | Clustered           | 67 VC_761_0 | 67 | 0.8947 | 1          | 0.8947 | 0 | 0 | 0 | 1 Ref      |
| KC801932 | Unassigned | Unassigned | Unassigned | 669_1  | Clustered           | 10 VC_669_1 | 10 | 0.1268 | 1          | 0.1268 | 0 | 0 | 0 | 0.9778 Ref |
| KC814930 | Unassigned | Unassigned | Unassigned | 45_0   | Clustered           | 12 VC_45_0  | 12 | 0.35   | 1          | 0.35   | 0 | 0 | 0 | 1 Ref      |
| KC821604 | Unassigned | Unassigned | Unassigned | 929_0  | Clustered           | 4 VC_929_0  | 4  | 0.846  | 0.99722201 | 0.8437 | 0 | 0 | 0 | 1 Ref      |
| KC821606 | Unassigned | Unassigned | Unassigned | 1011_0 | Clustered           | 9 VC_1011_0 | 9  | 1      | 1          | 1      | 0 | 0 | 0 | 1 Ref      |
| KC821607 | Unassigned | Unassigned | Unassigned | 445_1  | Clustered           | 2 VC_445_1  | 2  | 0.1297 | 0.93055167 | 0.1207 | 0 | 0 | 0 | 1 Ref      |
| KC821608 | Unassigned | Unassigned | Unassigned | 1012_0 | Clustered           | 4 VC_1012_0 | 4  | 0.8715 | 0.99995392 | 0.8714 | 0 | 0 | 0 | 1 Ref      |
| KC821609 | Unassigned | Unassigned | Unassigned | 1017_0 | Clustered           | 5 VC_1017_0 | 5  | 0.9759 | 0.9999961  | 0.9759 | 0 | 0 | 0 | 1 Ref      |
| KC821610 | Unassigned | Unassigned | Unassigned | 911_0  | Clustered           | 6 VC_911_0  | 6  | 0.2787 | 1          | 0.2787 | 0 | 0 | 0 | 1 Ref      |
| KC821612 | Unassigned | Unassigned | Unassigned | 1019_0 | Clustered           | 5 VC_1019_0 | 5  | 0.866  | 0.99999999 | 0.866  | 0 | 0 | 0 | 1 Ref      |
| KC821613 | Unassigned | Unassigned | Unassigned | 1020_0 | Clustered           | 5 VC_1020_0 | 5  | 0.827  | 0.9999997  | 0.827  | 0 | 0 | 0 | 1 Ref      |
| KC821614 | Unassigned | Unassigned | Unassigned | 1019_0 | Clustered           | 5 VC_1019_0 | 5  | 0.866  | 0.99999999 | 0.866  | 0 | 0 | 0 | 1 Ref      |
| KC821615 | Unassigned | Unassigned | Unassigned | 1020_0 | Clustered           | 5 VC_1020_0 | 5  | 0.827  | 0.9999997  | 0.827  | 0 | 0 | 0 | 1 Ref      |
| KC821616 | Unassigned | Unassigned | Unassigned | 911_0  | Clustered           | 6 VC_911_0  | 6  | 0.2787 | 1          | 0.2787 | 0 | 0 | 0 | 1 Ref      |
| KC821617 | Unassigned | Unassigned | Unassigned | 1020_0 | Clustered           | 5 VC_1020_0 | 5  | 0.827  | 0.9999997  | 0.827  | 0 | 0 | 0 | 1 Ref      |
| KC821618 | Unassigned | Unassigned | Unassigned | 445_1  | Clustered           | 2 VC_445_1  | 2  | 0.1297 | 0.93055167 | 0.1207 | 0 | 0 | 0 | 1 Ref      |
| KC821619 | Unassigned | Unassigned | Unassigned | 1020_0 | Clustered           | 5 VC_1020_0 | 5  | 0.827  | 0.9999997  | 0.827  | 0 | 0 | 0 | 1 Ref      |
| KC821620 | Unassigned | Unassigned | Unassigned | 1012_0 | Clustered           | 4 VC_1012_0 | 4  | 0.8715 | 0.99995392 | 0.8714 | 0 | 0 | 0 | 1 Ref      |
| KC821621 | Unassigned | Unassigned | Unassigned | 929_0  | Clustered           | 4 VC_929_0  | 4  | 0.846  | 0.99722201 | 0.8437 | 0 | 0 | 0 | 1 Ref      |
| KC821622 | Unassigned | Unassigned | Unassigned | 1012_0 | Clustered           | 4 VC_1012_0 | 4  | 0.8715 | 0.99995392 | 0.8714 | 0 | 0 | 0 | 1 Ref      |
| KC821623 | Unassigned | Unassigned | Unassigned | 1011_0 | Clustered           | 9 VC_1011_0 | 9  | 1      | 1          | 1      | 0 | 0 | 0 | 1 Ref      |
| KC821625 | Unassigned | Unassigned | Unassigned | 929_0  | Clustered           | 4 VC_929_0  | 4  | 0.846  | 0.99722201 | 0.8437 | 0 | 0 | 0 | 1 Ref      |
| KC821627 | Unassigned | Unassigned | Unassigned | 1020_0 | Clustered           | 5 VC_1020_0 | 5  | 0.827  | 0.9999997  | 0.827  | 0 | 0 | 0 | 1 Ref      |
| KC821628 | Unassigned | Unassigned | Unassigned | 1011_0 | Clustered           | 9 VC_1011_0 | 9  | 1      | 1          | 1      | 0 | 0 | 0 | 1 Ref      |
| KC821629 | Unassigned | Unassigned | Unassigned | 911_0  | Clustered           | 6 VC_911_0  | 6  | 0.2787 | 1          | 0.2787 | 0 | 0 | 0 | 1 Ref      |
| KC821630 | Unassigned | Unassigned | Unassigned | 911_0  | Clustered           | 6 VC_911_0  | 6  | 0.2787 | 1          | 0.2787 | 0 | 0 | 0 | 1 Ref      |
| KC821631 | Unassigned | Unassigned | Unassigned | 1011_0 | Clustered           | 9 VC_1011_0 | 9  | 1      | 1          | 1      | 0 | 0 | 0 | 1 Ref      |
| KC821632 | Unassigned | Unassigned | Unassigned | 1017_0 | Clustered           | 5 VC_1017_0 | 5  | 0.9759 | 0.9999961  | 0.9759 | 0 | 0 | 0 | 1 Ref      |
| KC821633 | Unassigned | Unassigned | Unassigned | 1012_0 | Clustered           | 4 VC_1012_0 | 4  | 0.8715 | 0.99995392 | 0.8714 | 0 | 0 | 0 | 1 Ref      |
| KC821634 | Unassigned | Unassigned | Unassigned | 911_0  | Clustered           | 6 VC_911_0  | 6  | 0.2787 | 1          | 0.2787 | 0 | 0 | 0 | 1 Ref      |
| KC853746 | Unassigned | Unassigned | Unassigned | 70_0   | Clustered           | 27 VC_70_0  | 27 | 0.5981 | 1          | 0.5981 | 0 | 0 | 0 | 0.9886 Ref |
| KC862295 | Unassigned | Unassigned | Unassigned | 77_0   | Clustered           | 20 VC_77_0  | 20 | 0.9657 | 1          | 0.9657 | 0 | 0 | 0 | 1 Ref      |
| KC862296 | Unassigned | Unassigned | Unassigned | 77_0   | Clustered           | 20 VC_77_0  | 20 | 0.9657 | 1          | 0.9657 | 0 | 0 | 0 | 1 Ref      |
| KC862297 | Unassigned | Unassigned | Unassigned | 76_0   | Clustered           | 37 VC_76_0  | 37 | 0.9403 | 1          | 0.9403 | 0 | 0 | 0 | 1 Ref      |
| KC862298 | Unassigned | Unassigned | Unassigned | 76_0   | Clustered           | 37 VC_76_0  | 37 | 0.9403 | 1          | 0.9403 | 0 | 0 | 0 | 1 Ref      |
| KC862299 | Unassigned | Unassigned | Unassigned | 77_0   | Clustered           | 20 VC_77_0  | 20 | 0.9657 | 1          | 0.9657 | 0 | 0 | 0 | 1 Ref      |
| KC862300 | Unassigned | Unassigned | Unassigned | 76_0   | Clustered           | 37 VC_76_0  | 37 | 0.9403 | 1          | 0.9403 | 0 | 0 | 0 | 1 Ref      |
| KC862301 | Unassigned | Unassigned | Unassigned | 77_0   | Clustered           | 20 VC_77_0  | 20 | 0.9657 | 1          | 0.9657 | 0 | 0 | 0 | 1 Ref      |
| KC900378 | Unassigned | Unassigned | Unassigned | 630_0  | Clustered           | 20 VC_630_0 | 20 | 0.8513 | 1          | 0.8513 | 0 | 0 | 0 | 1 Ref      |
| KC900379 | Unassigned | Unassigned | Unassigned | 763_1  | Clustered           | 9 VC_763_1  | 9  | 0.3706 | 1          | 0.3706 | 0 | 0 | 0 | 1 Ref      |
| KC911856 | Unassigned | Unassigned | Unassigned | 476_0  | Clustered           | 19 VC_476_0 | 19 | 0.7814 | 1          | 0.7814 | 0 | 0 | 0 | 1 Ref      |
| KC911857 | Unassigned | Unassigned | Unassigned | 476_0  | Clustered           | 19 VC_476_0 | 19 | 0.7814 | 1          | 0.7814 | 0 | 0 | 0 | 1 Ref      |
| KC954774 | Unassigned | Unassigned | Unassigned | 849_5  | Clustered           | 3 VC_849_5  | 3  | 0.0492 | 0.97574727 | 0.048  | 0 | 0 | 0 | 1 Ref      |
| KC954775 | Unassigned | Unassigned | Unassigned | 580_0  | Clustered           | 2 VC_580_0  | 2  | 0.0632 | 0.95763305 | 0.0605 | 0 | 0 | 0 | 1 Ref      |
| KC959568 | Unassigned | Unassigned | Unassigned | 1023_0 | Clustered           | 8 VC_1023_0 | 8  | 0.8574 | 1          | 0.8574 | 0 | 0 | 0 | 1 Ref      |
| KC960489 | Unassigned | Unassigned | Unassigned | 1024_0 | Clustered           | 2 VC_1024_0 | 2  | 1      | 1          | 1      | 0 | 0 | 0 | 1 Ref      |
| KC960671 | Unassigned | Unassigned | Unassigned | 385_0  | Clustered           | 51 VC_385_0 | 51 | 0.8754 | 1          | 0.8754 | 0 | 0 | 0 | 1 Ref      |
| KC969441 | Unassigned | Unassigned | Unassigned | 423_0  | Clustered           | 45 VC_423_0 | 45 | 0.9484 | 1          | 0.9484 | 0 | 0 | 0 | 1 Ref      |
| KF005317 | Unassigned | Unassigned | Unassigned | 1025_0 | Clustered           | 4 VC_1025_0 | 4  | 1      | 0          | 0      | 0 | 0 | 0 | 1 Ref      |
| KF005318 | Unassigned | Unassigned | Unassigned | 1025_0 | Clustered           | 4 VC_1025_0 | 4  | 1      | 0          | 0      | 0 | 0 | 0 | 1 Ref      |
| KF005319 | Unassigned | Unassigned | Unassigned | 1025_0 | Clustered           | 4 VC_1025_0 | 4  | 1      | 0          | 0      | 0 | 0 | 0 | 1 Ref      |
| KF005320 | Unassigned | Unassigned | Unassigned | 1025_0 | Clustered           | 4 VC_1025_0 | 4  | 1      | 0          | 0      | 0 | 0 | 0 | 1 Ref      |
| KF006817 | Unassigned | Unassigned | Unassigned | 558_9  | Clustered           | 3 VC_558_9  | 3  | 0.0064 | 0.82911529 | 0.0053 | 0 | 0 | 0 | 0.6667 Ref |
| KF006818 | Unassigned | Unassigned | Unassigned | 546_6  | Clustered           | 2 VC_546_6  | 2  | 0.0135 | 0.7810929  | 0.0105 | 0 | 0 | 0 | 1 Ref      |
| KF010834 | Unassigned | Unassigned | Unassigned | 708_0  | Clustered           | 47 VC_708_0 | 47 | 0.8654 | 1          | 0.8654 | 0 | 0 | 0 | 1 Ref      |
| KF017001 | Unassigned | Unassigned | Unassigned | 940_0  | Clustered           | 34 VC_940_0 | 34 | 0.7959 | 1          | 0.7959 | 0 | 0 | 0 | 1 Ref      |
| KF017002 | Unassigned | Unassigned | Unassigned | 556_0  | Clustered           | 21 VC_556_0 | 21 | 0.9912 | 1          | 0.9912 | 0 | 0 | 0 | 1 Ref      |
| KF017927 | Unassigned | Unassigned | Unassigned | 215_0  | Clustered           | 5 VC_215_0  | 5  | 0.0724 | 0.99999997 | 0.0724 | 0 | 0 | 0 | 1 Ref      |
| KF021268 | Unassigned | Unassigned | Unassigned | 150_0  | Clustered           | 13 VC_150_0 | 13 | 0.2417 | 1          | 0.2417 | 0 | 0 | 0 | 0.9872 Ref |
| KF024721 | Unassigned | Unassigned | Unassigned | 216_3  | Clustered           | 8 VC_216_3  | 8  | 0.0701 | 1          | 0.0701 | 0 | 0 | 0 | 0.8571 Ref |
| KF024722 | Unassigned | Unassigned | Unassigned | 508_0  | Clustered           | 32 VC_508_0 | 32 | 0.906  | 1          | 0.906  | 0 | 0 | 0 | 1 Ref      |



|          |            |            |            |        |                     |              |     |        |            |        |   |   |   |            |
|----------|------------|------------|------------|--------|---------------------|--------------|-----|--------|------------|--------|---|---|---|------------|
| KF024723 | Unassigned | Unassigned | Unassigned | 520_23 | Clustered           | 2 VC_520_23  | 2   | 0.0077 | 0.95763408 | 0.0074 | 0 | 0 | 0 | 1 Ref      |
| KF024724 | Unassigned | Unassigned | Unassigned | 325_35 | Clustered           | 17 VC_325_35 | 17  | 0.0732 | 1          | 0.0732 | 0 | 0 | 0 | 0.7721 Ref |
| KF024725 | Unassigned | Unassigned | Unassigned | 889_0  | Clustered           | 16 VC_889_0  | 16  | 0.2969 | 1          | 0.2969 | 0 | 0 | 0 | 1 Ref      |
| KF024726 | Unassigned | Unassigned | Unassigned | 325_8  | Clustered           | 2 VC_325_8   | 2   | 0.0093 | 0.95751268 | 0.0089 | 0 | 0 | 0 | 1 Ref      |
| KF024727 | Unassigned | Unassigned | Unassigned | 372_1  | Clustered           | 9 VC_372_1   | 9   | 0.194  | 1          | 0.194  | 0 | 0 | 0 | 1 Ref      |
| KF024728 | Unassigned | Unassigned | Unassigned | 574_0  | Clustered           | 7 VC_574_0   | 7   | 0.2734 | 1          | 0.2734 | 0 | 0 | 0 | 1 Ref      |
| KF024729 | Unassigned | Unassigned | Unassigned | 372_3  | Clustered           | 5 VC_372_3   | 5   | 0.1129 | 0.99999997 | 0.1129 | 0 | 0 | 0 | 1 Ref      |
| KF024730 | Unassigned | Unassigned | Unassigned | 556_0  | Clustered           | 21 VC_556_0  | 21  | 0.9912 | 1          | 0.9912 | 0 | 0 | 0 | 1 Ref      |
| KF024731 | Unassigned | Unassigned | Unassigned | 888_0  | Clustered           | 28 VC_888_0  | 28  | 0.5497 | 1          | 0.5497 | 0 | 0 | 0 | 1 Ref      |
| KF024732 | Unassigned | Unassigned | Unassigned | 551_8  | Clustered           | 19 VC_551_8  | 19  | 0.1039 | 1          | 0.1039 | 0 | 0 | 0 | 0.8713 Ref |
| KF024733 | Unassigned | Unassigned | Unassigned | 517_1  | Clustered           | 108 VC_517_1 | 108 | 0.8483 | 1          | 0.8483 | 0 | 0 | 0 | 0.9955 Ref |
| KF024734 | Unassigned | Unassigned | Unassigned | 558_48 | Clustered           | 2 VC_558_48  | 2   | 0.0032 | 0.69466126 | 0.0022 | 0 | 0 | 0 | 1 Ref      |
| KF055347 | Unassigned | Unassigned | Unassigned | 329_16 | Clustered           | 4 VC_329_16  | 4   | 0.0158 | 0.9999807  | 0.0158 | 0 | 0 | 0 | 1 Ref      |
| KF056323 | Unassigned | Unassigned | Unassigned | 834_0  | Clustered           | 7 VC_834_0   | 7   | 0.9845 | 0.94276893 | 0.9282 | 0 | 0 | 0 | 1 Ref      |
| KF114874 | Unassigned | Unassigned | Unassigned | 520_9  | Clustered/Singleton | 1 VC_520_9   | 1   | 0      | 1          | 0      | 0 | 0 | 0 | 1 Ref      |
| KF114875 | Unassigned | Unassigned | Unassigned | 546_4  | Clustered           | 16 VC_546_4  | 16  | 0.2517 | 0.9999998  | 0.2517 | 0 | 0 | 0 | 0.9417 Ref |
| KF114876 | Unassigned | Unassigned | Unassigned | 687_1  | Clustered           | 2 VC_687_1   | 2   | 0.223  | 0.91418477 | 0.2038 | 0 | 0 | 0 | 1 Ref      |
| KF114877 | Unassigned | Unassigned | Unassigned | 687_1  | Clustered           | 2 VC_687_1   | 2   | 0.223  | 0.91418477 | 0.2038 | 0 | 0 | 0 | 1 Ref      |
| KF114879 | Unassigned | Unassigned | Unassigned | 687_0  | Clustered           | 3 VC_687_0   | 3   | 0.5872 | 0.99252665 | 0.5828 | 0 | 0 | 0 | 1 Ref      |
| KF114880 | Unassigned | Unassigned | Unassigned | 687_0  | Clustered           | 3 VC_687_0   | 3   | 0.5872 | 0.99252665 | 0.5828 | 0 | 0 | 0 | 1 Ref      |
| KF148055 | Unassigned | Unassigned | Unassigned | 637_2  | Clustered           | 2 VC_637_2   | 2   | 0.0038 | 0.92844927 | 0.0035 | 0 | 0 | 0 | 1 Ref      |
| KF148616 | Unassigned | Unassigned | Unassigned | 844_0  | Clustered           | 27 VC_844_0  | 27  | 0.9385 | 1          | 0.9385 | 0 | 0 | 0 | 1 Ref      |
| KF156338 | Unassigned | Unassigned | Unassigned | 433_2  | Clustered/Singleton | 1 VC_433_2   | 1   | 0      | 1          | 0      | 0 | 0 | 0 | 1 Ref      |
| KF188410 | Unassigned | Unassigned | Unassigned | 640_0  | Clustered           | 7 VC_640_0   | 7   | 0.9025 | 1          | 0.9025 | 0 | 0 | 0 | 1 Ref      |
| KF188414 | Unassigned | Unassigned | Unassigned | 551_2  | Clustered           | 17 VC_551_2  | 17  | 0.0973 | 1          | 0.0973 | 0 | 0 | 0 | 0.9779 Ref |
| KF192053 | Unassigned | Unassigned | Unassigned | 108_0  | Clustered           | 33 VC_108_0  | 33  | 0.949  | 1          | 0.949  | 0 | 0 | 0 | 1 Ref      |
| KF192075 | Unassigned | Unassigned | Unassigned | 779_0  | Clustered           | 37 VC_779_0  | 37  | 0.5682 | 1          | 0.5682 | 0 | 0 | 0 | 1 Ref      |
| KF208315 | Unassigned | Unassigned | Unassigned | 283_90 | Clustered/Singleton | 1 VC_283_90  | 1   | 0      | 1          | 0      | 0 | 0 | 0 | 1 Ref      |
| KF208639 | Unassigned | Unassigned | Unassigned | 883_1  | Clustered           | 12 VC_883_1  | 12  | 0.2441 | 1          | 0.2441 | 0 | 0 | 0 | 1 Ref      |
| KF279411 | Unassigned | Unassigned | Unassigned | 372_0  | Clustered           | 24 VC_372_0  | 24  | 0.5539 | 1          | 0.5539 | 0 | 0 | 0 | 1 Ref      |
| KF279412 | Unassigned | Unassigned | Unassigned | 372_0  | Clustered           | 24 VC_372_0  | 24  | 0.5539 | 1          | 0.5539 | 0 | 0 | 0 | 1 Ref      |
| KF279413 | Unassigned | Unassigned | Unassigned | 372_0  | Clustered           | 24 VC_372_0  | 24  | 0.5539 | 1          | 0.5539 | 0 | 0 | 0 | 1 Ref      |
| KF279415 | Unassigned | Unassigned | Unassigned | 325_35 | Clustered           | 17 VC_325_35 | 17  | 0.0732 | 1          | 0.0732 | 0 | 0 | 0 | 0.7721 Ref |
| KF279416 | Unassigned | Unassigned | Unassigned | 325_35 | Clustered           | 17 VC_325_35 | 17  | 0.0732 | 1          | 0.0732 | 0 | 0 | 0 | 0.7721 Ref |
| KF279417 | Unassigned | Unassigned | Unassigned | 551_7  | Clustered           | 28 VC_551_7  | 28  | 0.1661 | 1          | 0.1661 | 0 | 0 | 0 | 0.8519 Ref |
| KF279418 | Unassigned | Unassigned | Unassigned | 514_0  | Clustered           | 75 VC_514_0  | 75  | 0.9402 | 1          | 0.9402 | 0 | 0 | 0 | 1 Ref      |
| KF296717 | Unassigned | Unassigned | Unassigned | 829_0  | Clustered           | 5 VC_829_0   | 5   | 0.8821 | 0.99999832 | 0.8821 | 0 | 0 | 0 | 1 Ref      |
| KF302032 | Unassigned | Unassigned | Unassigned | 894_0  | Clustered           | 3 VC_894_0   | 3   | 0.6358 | 0.99692152 | 0.6338 | 0 | 0 | 0 | 1 Ref      |
| KF302033 | Unassigned | Unassigned | Unassigned | 894_0  | Clustered           | 3 VC_894_0   | 3   | 0.6358 | 0.99692152 | 0.6338 | 0 | 0 | 0 | 1 Ref      |
| KF302034 | Unassigned | Unassigned | Unassigned | 496_0  | Clustered/Singleton | 1 VC_496_0   | 1   | 0      | 1          | 0      | 0 | 0 | 0 | 1 Ref      |
| KF302035 | Unassigned | Unassigned | Unassigned | 183_0  | Clustered           | 2 VC_183_0   | 2   | 0.0667 | 0.95489893 | 0.0637 | 0 | 0 | 0 | 1 Ref      |
| KF302036 | Unassigned | Unassigned | Unassigned | 895_0  | Clustered           | 2 VC_895_0   | 2   | 0.2788 | 0.94251254 | 0.2628 | 0 | 0 | 0 | 1 Ref      |
| KF302037 | Unassigned | Unassigned | Unassigned | 756_0  | Clustered           | 2 VC_756_0   | 2   | 0.1637 | 0.95427014 | 0.1562 | 0 | 0 | 0 | 1 Ref      |
| KF306380 | Unassigned | Unassigned | Unassigned | 551_3  | Clustered/Singleton | 1 VC_551_3   | 1   | 0      | 1          | 0      | 0 | 0 | 0 | 1 Ref      |
| KF319020 | Unassigned | Unassigned | Unassigned | 112_0  | Clustered           | 8 VC_112_0   | 8   | 0.2537 | 1          | 0.2537 | 0 | 0 | 0 | 1 Ref      |
| KF322026 | Unassigned | Unassigned | Unassigned | 1027_0 | Clustered           | 20 VC_1027_0 | 20  | 0.7114 | 1          | 0.7114 | 0 | 0 | 0 | 1 Ref      |
| KF322032 | Unassigned | Unassigned | Unassigned | 228_0  | Clustered           | 60 VC_228_0  | 60  | 0.942  | 1          | 0.942  | 0 | 0 | 0 | 1 Ref      |
| KF356199 | Unassigned | Unassigned | Unassigned | 38_0   | Clustered           | 3 VC_38_0    | 3   | 1      | 0          | 0      | 0 | 0 | 0 | 1 Ref      |
| KF361475 | Unassigned | Unassigned | Unassigned | 5_0    | Clustered           | 30 VC_5_0    | 30  | 0.9647 | 1          | 0.9647 | 0 | 0 | 0 | 1 Ref      |
| KF381361 | Unassigned | Unassigned | Unassigned | 437_0  | Clustered           | 4 VC_437_0   | 4   | 0.552  | 0.99998233 | 0.552  | 0 | 0 | 0 | 1 Ref      |
| KF416340 | Unassigned | Unassigned | Unassigned | 325_49 | Clustered           | 4 VC_325_49  | 4   | 0.014  | 0.99995965 | 0.014  | 0 | 0 | 0 | 1 Ref      |
| KF416341 | Unassigned | Unassigned | Unassigned | 372_1  | Clustered           | 9 VC_372_1   | 9   | 0.194  | 1          | 0.194  | 0 | 0 | 0 | 1 Ref      |
| KF416342 | Unassigned | Unassigned | Unassigned | 568_0  | Clustered           | 8 VC_568_0   | 8   | 0.5738 | 1          | 0.5738 | 0 | 0 | 0 | 1 Ref      |
| KF416343 | Unassigned | Unassigned | Unassigned | 551_4  | Clustered           | 2 VC_551_4   | 2   | 0.006  | 0.95695857 | 0.0058 | 0 | 0 | 0 | 1 Ref      |
| KF416344 | Unassigned | Unassigned | Unassigned | 215_0  | Clustered           | 5 VC_215_0   | 5   | 0.0724 | 0.99999997 | 0.0724 | 0 | 0 | 0 | 1 Ref      |
| KF475786 | Unassigned | Unassigned | Unassigned | 179_0  | Clustered           | 53 VC_179_0  | 53  | 0.9137 | 1          | 0.9137 | 0 | 0 | 0 | 1 Ref      |
| KF493879 | Unassigned | Unassigned | Unassigned | 509_0  | Clustered           | 37 VC_509_0  | 37  | 0.9689 | 1          | 0.9689 | 0 | 0 | 0 | 1 Ref      |
| KF493880 | Unassigned | Unassigned | Unassigned | 325_3  | Clustered/Singleton | 1 VC_325_3   | 1   | 0      | 1          | 0      | 0 | 0 | 0 | 1 Ref      |
| KF493881 | Unassigned | Unassigned | Unassigned | 372_0  | Clustered           | 24 VC_372_0  | 24  | 0.5539 | 1          | 0.5539 | 0 | 0 | 0 | 1 Ref      |
| KF493882 | Unassigned | Unassigned | Unassigned | 940_0  | Clustered           | 34 VC_940_0  | 34  | 0.7959 | 1          | 0.7959 | 0 | 0 | 0 | 1 Ref      |
| KF493883 | Unassigned | Unassigned | Unassigned | 551_8  | Clustered           | 19 VC_551_8  | 19  | 0.1039 | 1          | 0.1039 | 0 | 0 | 0 | 0.8713 Ref |
| KF534715 | Unassigned | Unassigned | Unassigned | 792_0  | Clustered           | 35 VC_792_0  | 35  | 0.9828 | 1          | 0.9828 | 0 | 0 | 0 | 1 Ref      |
| KF550303 | Unassigned | Unassigned | Unassigned | 582_4  | Clustered           | 3 VC_582_4   | 3   | 0.0348 | 0.98173503 | 0.0341 | 0 | 0 | 0 | 1 Ref      |
| KF554508 | Unassigned | Unassigned | Unassigned | 87_1   | Clustered           | 3 VC_87_1    | 3   | 0.1636 | 0.99777924 | 0.1632 | 0 | 0 | 0 | 1 Ref      |
| KF560330 | Unassigned | Unassigned | Unassigned | 940_0  | Clustered           | 34 VC_940_0  | 34  | 0.7959 | 1          | 0.7959 | 0 | 0 | 0 | 1 Ref      |
| KF560331 | Unassigned | Unassigned | Unassigned | 325_33 | Clustered           | 4 VC_325_33  | 4   | 0.0149 | 0.99998565 | 0.0149 | 0 | 0 | 0 | 1 Ref      |
| KF560332 | Unassigned | Unassigned | Unassigned | 223_0  | Clustered           | 38 VC_223_0  | 38  | 0.9095 | 1          | 0.9095 | 0 | 0 | 0 | 1 Ref      |
| KF560333 | Unassigned | Unassigned | Unassigned | 223_0  | Clustered           | 38 VC_223_0  | 38  | 0.9095 | 1          | 0.9095 | 0 | 0 | 0 | 1 Ref      |
| KF560334 | Unassigned | Unassigned | Unassigned | 223_0  | Clustered           | 38 VC_223_0  | 38  | 0.9095 | 1          | 0.9095 | 0 | 0 | 0 | 1 Ref      |
| KF562099 | Unassigned | Unassigned | Unassigned | 551_8  | Clustered           | 19 VC_551_8  | 19  | 0.1039 | 1          | 0.1039 | 0 | 0 | 0 | 0.8713 Ref |
| KF562100 | Unassigned | Unassigned | Unassigned | 551_8  | Clustered           | 19 VC_551_8  | 19  | 0.1039 | 1          | 0.1039 | 0 | 0 | 0 | 0.8713 Ref |
| KF562101 | Unassigned | Unassigned | Unassigned | 551_8  | Clustered           | 19 VC_551_8  | 19  | 0.1039 | 1          | 0.1039 | 0 | 0 | 0 | 0.8713 Ref |
| KF562102 | Unassigned | Unassigned | Unassigned | 551_8  | Clustered           | 19 VC_551_8  | 19  | 0.1039 | 1          | 0.1039 | 0 | 0 | 0 | 0.8713 Ref |
| KF562340 | Unassigned | Unassigned | Unassigned | 779_0  | Clustered           | 37 VC_779_0  | 37  | 0.5682 | 1          | 0.5682 | 0 | 0 | 0 | 1 Ref      |
| KF562341 | Unassigned | Unassigned | Unassigned | 286_10 | Clustered           | 9 VC_286_10  | 9   | 0.0615 | 0.99999878 | 0.0615 | 0 | 0 | 0 | 0.6667 Ref |
| KF562864 | Unassigned | Unassigned | Unassigned | 637_1  | Clustered           | 27 VC_637_1  | 27  | 0.2578 | 1          | 0.2578 | 0 | 0 | 0 | 0.9858 Ref |
| KF562865 | Unassigned | Unassigned | Unassigned | 637_1  | Clustered           | 27 VC_637_1  | 27  | 0.2578 | 1          | 0.2578 | 0 | 0 | 0 | 0.9858 Ref |
| KF582788 | Unassigned | Unassigned | Unassigned | 286_13 | Clustered           | 10 VC_286_13 | 10  | 0.0698 | 0.99999929 | 0.0698 | 0 | 0 | 0 | 0.9556 Ref |
| KF591601 | Unassigned | Unassigned | Unassigned | 705_0  | Clustered           | 11 VC_705_0  | 11  | 0.8861 | 1          | 0.8861 | 0 | 0 | 0 | 1 Ref      |
| KF598856 | Unassigned | Unassigned | Unassigned | 8_0    | Clustered           | 58 VC_8_0    | 58  | 0.8306 | 1          | 0.8306 | 0 | 0 | 0 | 0.9946 Ref |
| KF598865 | Unassigned | Unassigned | Unassigned | 777_0  | Clustered           | 3 VC_777_0   | 3   | 0.4763 | 0.9961812  | 0.4745 | 0 | 0 | 0 | 1 Ref      |



|          |            |            |            |         |                     |              |     |        |            |        |   |   |   |            |
|----------|------------|------------|------------|---------|---------------------|--------------|-----|--------|------------|--------|---|---|---|------------|
| KF614509 | Unassigned | Unassigned | Unassigned | 990_0   | Clustered           | 3 VC_990_0   | 3   | 0.6363 | 0.99819562 | 0.6351 | 0 | 0 | 0 | 1 Ref      |
| KF620435 | Unassigned | Unassigned | Unassigned | 779_0   | Clustered           | 37 VC_779_0  | 37  | 0.5682 | 1          | 0.5682 | 0 | 0 | 0 | 1 Ref      |
| KF623293 | Unassigned | Unassigned | Unassigned | 901_0   | Clustered           | 5 VC_901_0   | 5   | 0.9265 | 0.99999497 | 0.9265 | 0 | 0 | 0 | 1 Ref      |
| KF623294 | Unassigned | Unassigned | Unassigned | 488_2   | Clustered           | 2 VC_488_2   | 2   | 0.0325 | 0.95511029 | 0.0311 | 0 | 0 | 0 | 1 Ref      |
| KF626665 | Unassigned | Unassigned | Unassigned | 172_0   | Clustered           | 5 VC_172_0   | 5   | 0.3579 | 0.99999997 | 0.3579 | 0 | 0 | 0 | 1 Ref      |
| KF626667 | Unassigned | Unassigned | Unassigned | 74_0    | Clustered           | 15 VC_74_0   | 15  | 0.5204 | 1          | 0.5204 | 0 | 0 | 0 | 1 Ref      |
| KF626668 | Unassigned | Unassigned | Unassigned | 172_0   | Clustered           | 5 VC_172_0   | 5   | 0.3579 | 0.99999997 | 0.3579 | 0 | 0 | 0 | 1 Ref      |
| KF669647 | Unassigned | Unassigned | Unassigned | 883_1   | Clustered           | 12 VC_883_1  | 12  | 0.2441 | 1          | 0.2441 | 0 | 0 | 0 | 1 Ref      |
| KF669648 | Unassigned | Unassigned | Unassigned | 100_0   | Clustered           | 15 VC_100_0  | 15  | 0.6536 | 1          | 0.6536 | 0 | 0 | 0 | 1 Ref      |
| KF669649 | Unassigned | Unassigned | Unassigned | 87_0    | Clustered           | 8 VC_87_0    | 8   | 0.5545 | 1          | 0.5545 | 0 | 0 | 0 | 1 Ref      |
| KF669650 | Unassigned | Unassigned | Unassigned | 855_0   | Clustered           | 2 VC_855_0   | 2   | 0.0285 | 0.89378929 | 0.0255 | 0 | 0 | 0 | 1 Ref      |
| KF669651 | Unassigned | Unassigned | Unassigned | 100_0   | Clustered           | 15 VC_100_0  | 15  | 0.6536 | 1          | 0.6536 | 0 | 0 | 0 | 1 Ref      |
| KF669652 | Unassigned | Unassigned | Unassigned | 85_3    | Clustered           | 19 VC_85_3   | 19  | 0.3671 | 1          | 0.3671 | 0 | 0 | 0 | 0.807 Ref  |
| KF669653 | Unassigned | Unassigned | Unassigned | 133_0   | Clustered           | 2 VC_133_0   | 2   | 0.0063 | 0.94038884 | 0.0059 | 0 | 0 | 0 | 1 Ref      |
| KF669654 | Unassigned | Unassigned | Unassigned | 133_0   | Clustered           | 2 VC_133_0   | 2   | 0.0063 | 0.94038884 | 0.0059 | 0 | 0 | 0 | 1 Ref      |
| KF669655 | Unassigned | Unassigned | Unassigned | 1032_0  | Clustered           | 7 VC_1032_0  | 7   | 0.9887 | 0.99999504 | 0.9887 | 0 | 0 | 0 | 1 Ref      |
| KF669657 | Unassigned | Unassigned | Unassigned | 1032_0  | Clustered           | 7 VC_1032_0  | 7   | 0.9887 | 0.99999504 | 0.9887 | 0 | 0 | 0 | 1 Ref      |
| KF669659 | Unassigned | Unassigned | Unassigned | 100_0   | Clustered           | 15 VC_100_0  | 15  | 0.6536 | 1          | 0.6536 | 0 | 0 | 0 | 1 Ref      |
| KF669660 | Unassigned | Unassigned | Unassigned | 1032_0  | Clustered           | 7 VC_1032_0  | 7   | 0.9887 | 0.99999504 | 0.9887 | 0 | 0 | 0 | 1 Ref      |
| KF669662 | Unassigned | Unassigned | Unassigned | 883_3   | Clustered           | 2 VC_883_3   | 2   | 0.0182 | 0.87900236 | 0.016  | 0 | 0 | 0 | 1 Ref      |
| KF676640 | Unassigned | Unassigned | Unassigned | 202_0   | Clustered           | 102 VC_202_0 | 102 | 0.4049 | 1          | 0.4049 | 0 | 0 | 0 | 0.7876 Ref |
| KF692088 | Unassigned | Unassigned | Unassigned | 1034_1  | Clustered/Singleton | 1 VC_1034_1  | 1   | 0      | 1          | 0      | 0 | 0 | 0 | 1 Ref      |
| KF700371 | Unassigned | Unassigned | Unassigned | 386_0   | Clustered           | 49 VC_386_0  | 49  | 0.7941 | 1          | 0.7941 | 0 | 0 | 0 | 1 Ref      |
| KF713485 | Unassigned | Unassigned | Unassigned | 371_3   | Clustered           | 22 VC_371_3  | 22  | 0.0787 | 1          | 0.0787 | 0 | 0 | 0 | 0.9048 Ref |
| KF713486 | Unassigned | Unassigned | Unassigned | 237_0   | Clustered           | 4 VC_237_0   | 4   | 0.0429 | 0.99998759 | 0.0429 | 0 | 0 | 0 | 1 Ref      |
| KF728385 | Unassigned | Unassigned | Unassigned | 695_0   | Clustered           | 48 VC_695_0  | 48  | 0.8162 | 1          | 0.8162 | 0 | 0 | 0 | 1 Ref      |
| KF733017 | Unassigned | Unassigned | Unassigned | 695_0   | Clustered           | 48 VC_695_0  | 48  | 0.8162 | 1          | 0.8162 | 0 | 0 | 0 | 1 Ref      |
| KF751793 | Unassigned | Unassigned | Unassigned | 1039_0  | Clustered           | 5 VC_1039_0  | 5   | 1      | 1          | 1      | 0 | 0 | 0 | 1 Ref      |
| KF751794 | Unassigned | Unassigned | Unassigned | 1039_0  | Clustered           | 5 VC_1039_0  | 5   | 1      | 1          | 1      | 0 | 0 | 0 | 1 Ref      |
| KF751795 | Unassigned | Unassigned | Unassigned | 1039_0  | Clustered           | 5 VC_1039_0  | 5   | 1      | 1          | 1      | 0 | 0 | 0 | 1 Ref      |
| KF751796 | Unassigned | Unassigned | Unassigned | 1039_0  | Clustered           | 5 VC_1039_0  | 5   | 1      | 1          | 1      | 0 | 0 | 0 | 1 Ref      |
| KF751797 | Unassigned | Unassigned | Unassigned | 1039_0  | Clustered           | 5 VC_1039_0  | 5   | 1      | 1          | 1      | 0 | 0 | 0 | 1 Ref      |
| KF765493 | Unassigned | Unassigned | Unassigned | 111_0   | Clustered           | 91 VC_111_0  | 91  | 0.9587 | 1          | 0.9587 | 0 | 0 | 0 | 1 Ref      |
| KF766114 | Unassigned | Unassigned | Unassigned | 149_8   | Clustered           | 66 VC_149_8  | 66  | 0.4565 | 1          | 0.4565 | 0 | 0 | 0 | 0.8182 Ref |
| KF766125 | Unassigned | Unassigned | Unassigned | 46_0    | Clustered           | 2 VC_46_0    | 2   | 0.0181 | 0.95763537 | 0.0173 | 0 | 0 | 0 | 1 Ref      |
| KF767351 | Unassigned | Unassigned | Unassigned | 308_0   | Clustered           | 4 VC_308_0   | 4   | 0.5014 | 0.99997418 | 0.5013 | 0 | 0 | 0 | 1 Ref      |
| KF771236 | Unassigned | Unassigned | Unassigned | 455_0   | Clustered           | 18 VC_455_0  | 18  | 0.4598 | 1          | 0.4598 | 0 | 0 | 0 | 1 Ref      |
| KF771237 | Unassigned | Unassigned | Unassigned | 455_0   | Clustered           | 18 VC_455_0  | 18  | 0.4598 | 1          | 0.4598 | 0 | 0 | 0 | 1 Ref      |
| KF771238 | Unassigned | Unassigned | Unassigned | 455_0   | Clustered           | 18 VC_455_0  | 18  | 0.4598 | 1          | 0.4598 | 0 | 0 | 0 | 1 Ref      |
| KF771239 | Unassigned | Unassigned | Unassigned | 455_0   | Clustered           | 18 VC_455_0  | 18  | 0.4598 | 1          | 0.4598 | 0 | 0 | 0 | 1 Ref      |
| KF787094 | Unassigned | Unassigned | Unassigned | 779_1   | Clustered           | 11 VC_779_1  | 11  | 0.1587 | 1          | 0.1587 | 0 | 0 | 0 | 1 Ref      |
| KF787095 | Unassigned | Unassigned | Unassigned | 779_1   | Clustered           | 11 VC_779_1  | 11  | 0.1587 | 1          | 0.1587 | 0 | 0 | 0 | 1 Ref      |
| KF800937 | Unassigned | Unassigned | Unassigned | 1027_0  | Clustered           | 20 VC_1027_0 | 20  | 0.7114 | 1          | 0.7114 | 0 | 0 | 0 | 1 Ref      |
| KF806588 | Unassigned | Unassigned | Unassigned | 779_2   | Clustered           | 5 VC_779_2   | 5   | 0.0876 | 0.99999997 | 0.0876 | 0 | 0 | 0 | 1 Ref      |
| KF806589 | Unassigned | Unassigned | Unassigned | 489_1   | Clustered           | 11 VC_489_1  | 11  | 0.4621 | 1          | 0.4621 | 0 | 0 | 0 | 1 Ref      |
| KF831354 | Unassigned | Unassigned | Unassigned | 10_0    | Clustered           | 25 VC_10_0   | 25  | 0.3467 | 1          | 0.3467 | 0 | 0 | 0 | 0.9733 Ref |
| KF835987 | Unassigned | Unassigned | Unassigned | 490_2   | Clustered/Singleton | 1 VC_490_2   | 1   | 0      | 1          | 0      | 0 | 0 | 0 | 1 Ref      |
| KF841475 | Unassigned | Unassigned | Unassigned | 517_1   | Clustered           | 108 VC_517_1 | 108 | 0.8483 | 1          | 0.8483 | 0 | 0 | 0 | 0.9955 Ref |
| KF841476 | Unassigned | Unassigned | Unassigned | 517_1   | Clustered           | 108 VC_517_1 | 108 | 0.8483 | 1          | 0.8483 | 0 | 0 | 0 | 0.9955 Ref |
| KF841477 | Unassigned | Unassigned | Unassigned | 519_0   | Clustered           | 39 VC_519_0  | 39  | 0.8156 | 1          | 0.8156 | 0 | 0 | 0 | 1 Ref      |
| KF854250 | Unassigned | Unassigned | Unassigned | 498_0   | Clustered           | 8 VC_498_0   | 8   | 0.3987 | 1          | 0.3987 | 0 | 0 | 0 | 1 Ref      |
| KF856712 | Unassigned | Unassigned | Unassigned | 472_0   | Clustered           | 47 VC_472_0  | 47  | 0.9025 | 1          | 0.9025 | 0 | 0 | 0 | 1 Ref      |
| KF861510 | Unassigned | Unassigned | Unassigned | 218_0   | Clustered           | 3 VC_218_0   | 3   | 0.0481 | 0.99860979 | 0.0481 | 0 | 0 | 0 | 1 Ref      |
| KF925357 | Unassigned | Unassigned | Unassigned | 283_163 | Clustered           | 2 VC_283_163 | 2   | 0.0029 | 0.93420746 | 0.0027 | 0 | 0 | 0 | 1 Ref      |
| KF926093 | Unassigned | Unassigned | Unassigned | 474_0   | Clustered           | 14 VC_474_0  | 14  | 0.8466 | 1          | 0.8466 | 0 | 0 | 0 | 1 Ref      |
| KF929199 | Unassigned | Unassigned | Unassigned | 667_0   | Clustered           | 7 VC_667_0   | 7   | 0.4101 | 1          | 0.4101 | 0 | 0 | 0 | 1 Ref      |
| KF954506 | Unassigned | Unassigned | Unassigned | 517_1   | Clustered           | 108 VC_517_1 | 108 | 0.8483 | 1          | 0.8483 | 0 | 0 | 0 | 0.9955 Ref |
| KF959563 | Unassigned | Unassigned | Unassigned | 517_1   | Clustered           | 108 VC_517_1 | 108 | 0.8483 | 1          | 0.8483 | 0 | 0 | 0 | 0.9955 Ref |
| KF971864 | Unassigned | Unassigned | Unassigned | 42_0    | Clustered           | 49 VC_42_0   | 49  | 0.4517 | 1          | 0.4517 | 0 | 0 | 0 | 0.8597 Ref |
| KF977490 | Unassigned | Unassigned | Unassigned | 124_0   | Clustered           | 2 VC_124_0   | 2   | 0.3934 | 0.95337092 | 0.3751 | 0 | 0 | 0 | 1 Ref      |
| KF981601 | Unassigned | Unassigned | Unassigned | 216_6   | Clustered           | 42 VC_216_6  | 42  | 0.473  | 1          | 0.473  | 0 | 0 | 0 | 0.8351 Ref |
| KF981730 | Unassigned | Unassigned | Unassigned | 813_1   | Clustered           | 24 VC_813_1  | 24  | 0.535  | 1          | 0.535  | 0 | 0 | 0 | 1 Ref      |
| KF981875 | Unassigned | Unassigned | Unassigned | 80_0    | Clustered           | 41 VC_80_0   | 41  | 0.5837 | 1          | 0.5837 | 0 | 0 | 0 | 0.9805 Ref |
| KF981876 | Unassigned | Unassigned | Unassigned | 1024_0  | Clustered           | 2 VC_1024_0  | 2   | 1      | 1          | 1      | 0 | 0 | 0 | 1 Ref      |
| KF986246 | Unassigned | Unassigned | Unassigned | 521_0   | Clustered           | 37 VC_521_0  | 37  | 0.912  | 1          | 0.912  | 0 | 0 | 0 | 1 Ref      |
| KF986247 | Unassigned | Unassigned | Unassigned | 567_0   | Clustered           | 8 VC_567_0   | 8   | 0.4935 | 1          | 0.4935 | 0 | 0 | 0 | 1 Ref      |
| KJ002054 | Unassigned | Unassigned | Unassigned | 793_0   | Clustered           | 12 VC_793_0  | 12  | 0.8531 | 1          | 0.8531 | 0 | 0 | 0 | 1 Ref      |
| KJ003983 | Unassigned | Unassigned | Unassigned | 1018_0  | Clustered           | 2 VC_1018_0  | 2   | 0.0851 | 0.94401932 | 0.0804 | 0 | 0 | 0 | 1 Ref      |
| KJ010547 | Unassigned | Unassigned | Unassigned | 85_0    | Clustered           | 3 VC_85_0    | 3   | 0.0422 | 0.99823242 | 0.0421 | 0 | 0 | 0 | 1 Ref      |
| KJ010548 | Unassigned | Unassigned | Unassigned | 85_0    | Clustered           | 3 VC_85_0    | 3   | 0.0422 | 0.99823242 | 0.0421 | 0 | 0 | 0 | 1 Ref      |
| KJ018213 | Unassigned | Unassigned | Unassigned | 827_0   | Clustered           | 6 VC_827_0   | 6   | 0.7493 | 1          | 0.7493 | 0 | 0 | 0 | 1 Ref      |
| KJ019028 | Unassigned | Unassigned | Unassigned | 656_1   | Clustered           | 46 VC_656_1  | 46  | 0.8511 | 1          | 0.8511 | 0 | 0 | 0 | 1 Ref      |
| KJ019029 | Unassigned | Unassigned | Unassigned | 656_1   | Clustered           | 46 VC_656_1  | 46  | 0.8511 | 1          | 0.8511 | 0 | 0 | 0 | 1 Ref      |
| KJ019031 | Unassigned | Unassigned | Unassigned | 656_1   | Clustered           | 46 VC_656_1  | 46  | 0.8511 | 1          | 0.8511 | 0 | 0 | 0 | 1 Ref      |
| KJ019032 | Unassigned | Unassigned | Unassigned | 656_1   | Clustered           | 46 VC_656_1  | 46  | 0.8511 | 1          | 0.8511 | 0 | 0 | 0 | 1 Ref      |
| KJ019034 | Unassigned | Unassigned | Unassigned | 656_1   | Clustered           | 46 VC_656_1  | 46  | 0.8511 | 1          | 0.8511 | 0 | 0 | 0 | 1 Ref      |
| KJ019035 | Unassigned | Unassigned | Unassigned | 656_1   | Clustered           | 46 VC_656_1  | 46  | 0.8511 | 1          | 0.8511 | 0 | 0 | 0 | 1 Ref      |
| KJ019036 | Unassigned | Unassigned | Unassigned | 656_1   | Clustered           | 46 VC_656_1  | 46  | 0.8511 | 1          | 0.8511 | 0 | 0 | 0 | 1 Ref      |
| KJ019037 | Unassigned | Unassigned | Unassigned | 657_1   | Clustered           | 41 VC_657_1  | 41  | 0.7489 | 1          | 0.7489 | 0 | 0 | 0 | 1 Ref      |
| KJ019045 | Unassigned | Unassigned | Unassigned | 657_1   | Clustered           | 41 VC_657_1  | 41  | 0.7489 | 1          | 0.7489 | 0 | 0 | 0 | 1 Ref      |
| KJ019046 | Unassigned | Unassigned | Unassigned | 656_1   | Clustered           | 46 VC_656_1  | 46  | 0.8511 | 1          | 0.8511 | 0 | 0 | 0 | 1 Ref      |



[illegible]



|          |            |            |            |        |                     |              |    |        |            |        |   |   |   |            |
|----------|------------|------------|------------|--------|---------------------|--------------|----|--------|------------|--------|---|---|---|------------|
| KJ019164 | Unassigned | Unassigned | Unassigned | 656_1  | Clustered           | 46 VC_656_1  | 46 | 0.8511 | 1          | 0.8511 | 0 | 0 | 0 | 1 Ref      |
| KJ019165 | Unassigned | Unassigned | Unassigned | 656_1  | Clustered           | 46 VC_656_1  | 46 | 0.8511 | 1          | 0.8511 | 0 | 0 | 0 | 1 Ref      |
| KJ021043 | Unassigned | Unassigned | Unassigned | 123_0  | Clustered           | 23 VC_123_0  | 23 | 0.817  | 1          | 0.817  | 0 | 0 | 0 | 1 Ref      |
| KJ025956 | Unassigned | Unassigned | Unassigned | 520_38 | Clustered           | 6 VC_520_38  | 6  | 0.0519 | 1          | 0.0519 | 0 | 0 | 0 | 0.8667 Ref |
| KJ025957 | Unassigned | Unassigned | Unassigned | 284_0  | Clustered           | 3 VC_284_0   | 3  | 0.0495 | 0.99860966 | 0.0494 | 0 | 0 | 0 | 1 Ref      |
| KJ028219 | Unassigned | Unassigned | Unassigned | 809_0  | Clustered           | 2 VC_809_0   | 2  | 0.1799 | 0.96299906 | 0.1733 | 0 | 0 | 0 | 1 Ref      |
| KJ081346 | Unassigned | Unassigned | Unassigned | 187_2  | Clustered           | 2 VC_187_2   | 2  | 0.0209 | 0.93057595 | 0.0195 | 0 | 0 | 0 | 1 Ref      |
| KJ094020 | Unassigned | Unassigned | Unassigned | 980_0  | Clustered           | 10 VC_980_0  | 10 | 0.9996 | 1          | 0.9996 | 0 | 0 | 0 | 1 Ref      |
| KJ094021 | Unassigned | Unassigned | Unassigned | 980_0  | Clustered           | 10 VC_980_0  | 10 | 0.9996 | 1          | 0.9996 | 0 | 0 | 0 | 1 Ref      |
| KJ094022 | Unassigned | Unassigned | Unassigned | 378_0  | Clustered           | 9 VC_378_0   | 9  | 0.7603 | 1          | 0.7603 | 0 | 0 | 0 | 1 Ref      |
| KJ094023 | Unassigned | Unassigned | Unassigned | 379_0  | Clustered           | 5 VC_379_0   | 5  | 0.4779 | 0.99999992 | 0.4779 | 0 | 0 | 0 | 0.9 Ref    |
| KJ094029 | Unassigned | Unassigned | Unassigned | 739_0  | Clustered           | 26 VC_739_0  | 26 | 0.9571 | 1          | 0.9571 | 0 | 0 | 0 | 1 Ref      |
| KJ094030 | Unassigned | Unassigned | Unassigned | 739_0  | Clustered           | 26 VC_739_0  | 26 | 0.9571 | 1          | 0.9571 | 0 | 0 | 0 | 1 Ref      |
| KJ094031 | Unassigned | Unassigned | Unassigned | 739_0  | Clustered           | 26 VC_739_0  | 26 | 0.9571 | 1          | 0.9571 | 0 | 0 | 0 | 1 Ref      |
| KJ094032 | Unassigned | Unassigned | Unassigned | 108_0  | Clustered           | 33 VC_108_0  | 33 | 0.949  | 1          | 0.949  | 0 | 0 | 0 | 1 Ref      |
| KJ094033 | Unassigned | Unassigned | Unassigned | 739_0  | Clustered           | 26 VC_739_0  | 26 | 0.9571 | 1          | 0.9571 | 0 | 0 | 0 | 1 Ref      |
| KJ127303 | Unassigned | Unassigned | Unassigned | 108_0  | Clustered           | 33 VC_108_0  | 33 | 0.949  | 1          | 0.949  | 0 | 0 | 0 | 1 Ref      |
| KJ127304 | Unassigned | Unassigned | Unassigned | 695_0  | Clustered           | 48 VC_695_0  | 48 | 0.8162 | 1          | 0.8162 | 0 | 0 | 0 | 1 Ref      |
| KJ133688 | Unassigned | Unassigned | Unassigned | 879_0  | Clustered           | 36 VC_879_0  | 36 | 0.994  | 1          | 0.994  | 0 | 0 | 0 | 1 Ref      |
| KJ133689 | Unassigned | Unassigned | Unassigned | 879_0  | Clustered           | 36 VC_879_0  | 36 | 0.994  | 1          | 0.994  | 0 | 0 | 0 | 1 Ref      |
| KJ133690 | Unassigned | Unassigned | Unassigned | 879_0  | Clustered           | 36 VC_879_0  | 36 | 0.994  | 1          | 0.994  | 0 | 0 | 0 | 1 Ref      |
| KJ133691 | Unassigned | Unassigned | Unassigned | 879_0  | Clustered           | 36 VC_879_0  | 36 | 0.994  | 1          | 0.994  | 0 | 0 | 0 | 1 Ref      |
| KJ133692 | Unassigned | Unassigned | Unassigned | 879_0  | Clustered           | 36 VC_879_0  | 36 | 0.994  | 1          | 0.994  | 0 | 0 | 0 | 1 Ref      |
| KJ133693 | Unassigned | Unassigned | Unassigned | 879_0  | Clustered           | 36 VC_879_0  | 36 | 0.994  | 1          | 0.994  | 0 | 0 | 0 | 1 Ref      |
| KJ133694 | Unassigned | Unassigned | Unassigned | 879_0  | Clustered           | 36 VC_879_0  | 36 | 0.994  | 1          | 0.994  | 0 | 0 | 0 | 1 Ref      |
| KJ133695 | Unassigned | Unassigned | Unassigned | 879_0  | Clustered           | 36 VC_879_0  | 36 | 0.994  | 1          | 0.994  | 0 | 0 | 0 | 1 Ref      |
| KJ133696 | Unassigned | Unassigned | Unassigned | 879_0  | Clustered           | 36 VC_879_0  | 36 | 0.994  | 1          | 0.994  | 0 | 0 | 0 | 1 Ref      |
| KJ133697 | Unassigned | Unassigned | Unassigned | 879_0  | Clustered           | 36 VC_879_0  | 36 | 0.994  | 1          | 0.994  | 0 | 0 | 0 | 1 Ref      |
| KJ133698 | Unassigned | Unassigned | Unassigned | 879_0  | Clustered           | 36 VC_879_0  | 36 | 0.994  | 1          | 0.994  | 0 | 0 | 0 | 1 Ref      |
| KJ133699 | Unassigned | Unassigned | Unassigned | 879_0  | Clustered           | 36 VC_879_0  | 36 | 0.994  | 1          | 0.994  | 0 | 0 | 0 | 1 Ref      |
| KJ133700 | Unassigned | Unassigned | Unassigned | 879_0  | Clustered           | 36 VC_879_0  | 36 | 0.994  | 1          | 0.994  | 0 | 0 | 0 | 1 Ref      |
| KJ133701 | Unassigned | Unassigned | Unassigned | 879_0  | Clustered           | 36 VC_879_0  | 36 | 0.994  | 1          | 0.994  | 0 | 0 | 0 | 1 Ref      |
| KJ133702 | Unassigned | Unassigned | Unassigned | 879_0  | Clustered           | 36 VC_879_0  | 36 | 0.994  | 1          | 0.994  | 0 | 0 | 0 | 1 Ref      |
| KJ133703 | Unassigned | Unassigned | Unassigned | 879_0  | Clustered           | 36 VC_879_0  | 36 | 0.994  | 1          | 0.994  | 0 | 0 | 0 | 1 Ref      |
| KJ133704 | Unassigned | Unassigned | Unassigned | 879_0  | Clustered           | 36 VC_879_0  | 36 | 0.994  | 1          | 0.994  | 0 | 0 | 0 | 1 Ref      |
| KJ133705 | Unassigned | Unassigned | Unassigned | 879_0  | Clustered           | 36 VC_879_0  | 36 | 0.994  | 1          | 0.994  | 0 | 0 | 0 | 1 Ref      |
| KJ133706 | Unassigned | Unassigned | Unassigned | 879_0  | Clustered           | 36 VC_879_0  | 36 | 0.994  | 1          | 0.994  | 0 | 0 | 0 | 1 Ref      |
| KJ133707 | Unassigned | Unassigned | Unassigned | 879_0  | Clustered           | 36 VC_879_0  | 36 | 0.994  | 1          | 0.994  | 0 | 0 | 0 | 1 Ref      |
| KJ135004 | Unassigned | Unassigned | Unassigned | 779_0  | Clustered           | 37 VC_779_0  | 37 | 0.5682 | 1          | 0.5682 | 0 | 0 | 0 | 1 Ref      |
| KJ140076 | Unassigned | Unassigned | Unassigned | 12_0   | Clustered           | 21 VC_12_0   | 21 | 0.2274 | 1          | 0.2274 | 0 | 0 | 0 | 0.9571 Ref |
| KJ156985 | Unassigned | Unassigned | Unassigned | 515_0  | Clustered           | 16 VC_515_0  | 16 | 0.3793 | 1          | 0.3793 | 0 | 0 | 0 | 1 Ref      |
| KJ159566 | Unassigned | Unassigned | Unassigned | 102_0  | Clustered           | 2 VC_102_0   | 2  | 0.114  | 0.94637553 | 0.1079 | 0 | 0 | 0 | 1 Ref      |
| KJ173786 | Unassigned | Unassigned | Unassigned | 856_1  | Clustered           | 13 VC_856_1  | 13 | 0.5848 | 1          | 0.5848 | 0 | 0 | 0 | 1 Ref      |
| KJ174156 | Unassigned | Unassigned | Unassigned | 325_15 | Clustered/Singleton | 1 VC_325_15  | 1  | 0      | 1          | 0      | 0 | 0 | 0 | 1 Ref      |
| KJ174157 | Unassigned | Unassigned | Unassigned | 371_3  | Clustered           | 22 VC_371_3  | 22 | 0.0787 | 1          | 0.0787 | 0 | 0 | 0 | 0.9048 Ref |
| KJ174317 | Unassigned | Unassigned | Unassigned | 133_22 | Clustered           | 13 VC_133_22 | 13 | 0.0804 | 1          | 0.0804 | 0 | 0 | 0 | 0.8205 Ref |
| KJ174318 | Unassigned | Unassigned | Unassigned | 133_16 | Clustered/Singleton | 1 VC_133_16  | 1  | 0      | 1          | 0      | 0 | 0 | 0 | 1 Ref      |
| KJ183191 | Unassigned | Unassigned | Unassigned | 484_0  | Clustered           | 3 VC_484_0   | 3  | 0.3174 | 0.99843638 | 0.3169 | 0 | 0 | 0 | 1 Ref      |
| KJ183192 | Unassigned | Unassigned | Unassigned | 484_0  | Clustered           | 3 VC_484_0   | 3  | 0.3174 | 0.99843638 | 0.3169 | 0 | 0 | 0 | 1 Ref      |
| KJ183193 | Unassigned | Unassigned | Unassigned | 484_0  | Clustered           | 3 VC_484_0   | 3  | 0.3174 | 0.99843638 | 0.3169 | 0 | 0 | 0 | 1 Ref      |
| KJ190157 | Unassigned | Unassigned | Unassigned | 190_15 | Clustered           | 3 VC_190_15  | 3  | 0.0146 | 0.99759465 | 0.0145 | 0 | 0 | 0 | 0.6667 Ref |
| KJ190158 | Unassigned | Unassigned | Unassigned | 772_16 | Clustered           | 10 VC_772_16 | 10 | 0.0563 | 0.9434928  | 0.0531 | 0 | 0 | 0 | 0.8667 Ref |
| KJ194579 | Unassigned | Unassigned | Unassigned | 371_18 | Clustered           | 10 VC_371_18 | 10 | 0.0302 | 1          | 0.0302 | 0 | 0 | 0 | 0.8 Ref    |
| KJ194580 | Unassigned | Unassigned | Unassigned | 371_16 | Clustered           | 42 VC_371_16 | 42 | 0.1341 | 1          | 0.1341 | 0 | 0 | 0 | 0.7282 Ref |
| KJ194581 | Unassigned | Unassigned | Unassigned | 509_0  | Clustered           | 37 VC_509_0  | 37 | 0.9689 | 1          | 0.9689 | 0 | 0 | 0 | 1 Ref      |
| KJ194582 | Unassigned | Unassigned | Unassigned | 565_0  | Clustered           | 20 VC_565_0  | 20 | 0.8398 | 1          | 0.8398 | 0 | 0 | 0 | 1 Ref      |
| KJ194583 | Unassigned | Unassigned | Unassigned | 371_16 | Clustered           | 42 VC_371_16 | 42 | 0.1341 | 1          | 0.1341 | 0 | 0 | 0 | 0.7282 Ref |
| KJ194584 | Unassigned | Unassigned | Unassigned | 509_0  | Clustered           | 37 VC_509_0  | 37 | 0.9689 | 1          | 0.9689 | 0 | 0 | 0 | 1 Ref      |
| KJ194585 | Unassigned | Unassigned | Unassigned | 325_5  | Clustered           | 11 VC_325_5  | 11 | 0.047  | 1          | 0.047  | 0 | 0 | 0 | 0.7636 Ref |
| KJ206559 | Unassigned | Unassigned | Unassigned | 149_8  | Clustered           | 66 VC_149_8  | 66 | 0.4565 | 1          | 0.4565 | 0 | 0 | 0 | 0.8182 Ref |
| KJ206560 | Unassigned | Unassigned | Unassigned | 149_8  | Clustered           | 66 VC_149_8  | 66 | 0.4565 | 1          | 0.4565 | 0 | 0 | 0 | 0.8182 Ref |
| KJ206561 | Unassigned | Unassigned | Unassigned | 149_8  | Clustered           | 66 VC_149_8  | 66 | 0.4565 | 1          | 0.4565 | 0 | 0 | 0 | 0.8182 Ref |
| KJ206562 | Unassigned | Unassigned | Unassigned | 149_8  | Clustered           | 66 VC_149_8  | 66 | 0.4565 | 1          | 0.4565 | 0 | 0 | 0 | 0.8182 Ref |
| KJ206563 | Unassigned | Unassigned | Unassigned | 149_8  | Clustered           | 66 VC_149_8  | 66 | 0.4565 | 1          | 0.4565 | 0 | 0 | 0 | 0.8182 Ref |
| KJ210330 | Unassigned | Unassigned | Unassigned | 96_0   | Clustered           | 30 VC_96_0   | 30 | 0.718  | 1          | 0.718  | 0 | 0 | 0 | 1 Ref      |
| KJ409696 | Unassigned | Unassigned | Unassigned | 325_30 | Clustered           | 4 VC_325_30  | 4  | 0.0144 | 0.99998616 | 0.0144 | 0 | 0 | 0 | 0.8333 Ref |
| KJ409772 | Unassigned | Unassigned | Unassigned | 78_3   | Clustered           | 11 VC_78_3   | 11 | 0.2572 | 1          | 0.2572 | 0 | 0 | 0 | 1 Ref      |
| KJ410132 | Unassigned | Unassigned | Unassigned | 216_6  | Clustered           | 42 VC_216_6  | 42 | 0.473  | 1          | 0.473  | 0 | 0 | 0 | 0.8351 Ref |
| KJ410133 | Unassigned | Unassigned | Unassigned | 762_0  | Clustered           | 9 VC_762_0   | 9  | 0.0885 | 1          | 0.0885 | 0 | 0 | 0 | 1 Ref      |
| KJ410134 | Unassigned | Unassigned | Unassigned | 216_6  | Clustered           | 42 VC_216_6  | 42 | 0.473  | 1          | 0.473  | 0 | 0 | 0 | 0.8351 Ref |
| KJ410740 | Unassigned | Unassigned | Unassigned | 927_0  | Clustered           | 2 VC_927_0   | 2  | 0.0876 | 0.71936208 | 0.063  | 0 | 0 | 0 | 1 Ref      |
| KJ417497 | Unassigned | Unassigned | Unassigned | 414_0  | Clustered           | 37 VC_414_0  | 37 | 0.585  | 1          | 0.585  | 0 | 0 | 0 | 0.9474 Ref |
| KJ419279 | Unassigned | Unassigned | Unassigned | 722_0  | Clustered           | 13 VC_722_0  | 13 | 0.5104 | 1          | 0.5104 | 0 | 0 | 0 | 1 Ref      |
| KJ433973 | Unassigned | Unassigned | Unassigned | 372_3  | Clustered           | 5 VC_372_3   | 5  | 0.1129 | 0.99999997 | 0.1129 | 0 | 0 | 0 | 1 Ref      |
| KJ433974 | Unassigned | Unassigned | Unassigned | 372_3  | Clustered           | 5 VC_372_3   | 5  | 0.1129 | 0.99999997 | 0.1129 | 0 | 0 | 0 | 1 Ref      |
| KJ433975 | Unassigned | Unassigned | Unassigned | 372_3  | Clustered           | 5 VC_372_3   | 5  | 0.1129 | 0.99999997 | 0.1129 | 0 | 0 | 0 | 1 Ref      |
| KJ433976 | Unassigned | Unassigned | Unassigned | 372_3  | Clustered           | 5 VC_372_3   | 5  | 0.1129 | 0.99999997 | 0.1129 | 0 | 0 | 0 | 1 Ref      |
| KJ451625 | Unassigned | Unassigned | Unassigned | 187_3  | Clustered           | 9 VC_187_3   | 9  | 0.1971 | 1          | 0.1971 | 0 | 0 | 0 | 0.8611 Ref |
| KJ452291 | Unassigned | Unassigned | Unassigned | 12_0   | Clustered           | 21 VC_12_0   | 21 | 0.2274 | 1          | 0.2274 | 0 | 0 | 0 | 0.9571 Ref |
| KJ452292 | Unassigned | Unassigned | Unassigned | 10_0   | Clustered           | 25 VC_10_0   | 25 | 0.3467 | 1          | 0.3467 | 0 | 0 | 0 | 0.9733 Ref |
| KJ473422 | Unassigned | Unassigned | Unassigned | 700_1  | Clustered/Singleton | 1 VC_700_1   | 1  | 0      | 1          | 0      | 0 | 0 | 0 | 1 Ref      |



|          |            |            |            |        |           |              |     |        |            |        |   |   |   |            |
|----------|------------|------------|------------|--------|-----------|--------------|-----|--------|------------|--------|---|---|---|------------|
| KJ477077 | Unassigned | Unassigned | Unassigned | 179_0  | Clustered | 53 VC_179_0  | 53  | 0.9137 | 1          | 0.9137 | 0 | 0 | 0 | 1 Ref      |
| KJ477684 | Unassigned | Unassigned | Unassigned | 283_91 | Clustered | 11 VC_283_91 | 11  | 0.0285 | 1          | 0.0285 | 0 | 0 | 0 | 1 Ref      |
| KJ477685 | Unassigned | Unassigned | Unassigned | 283_91 | Clustered | 11 VC_283_91 | 11  | 0.0285 | 1          | 0.0285 | 0 | 0 | 0 | 1 Ref      |
| KJ477686 | Unassigned | Unassigned | Unassigned | 283_91 | Clustered | 11 VC_283_91 | 11  | 0.0285 | 1          | 0.0285 | 0 | 0 | 0 | 1 Ref      |
| KJ489010 | Unassigned | Unassigned | Unassigned | 801_0  | Clustered | 4 VC_801_0   | 4   | 0.4828 | 0.99998705 | 0.4828 | 0 | 0 | 0 | 1 Ref      |
| KJ489011 | Unassigned | Unassigned | Unassigned | 801_0  | Clustered | 4 VC_801_0   | 4   | 0.4828 | 0.99998705 | 0.4828 | 0 | 0 | 0 | 1 Ref      |
| KJ489012 | Unassigned | Unassigned | Unassigned | 801_0  | Clustered | 4 VC_801_0   | 4   | 0.4828 | 0.99998705 | 0.4828 | 0 | 0 | 0 | 1 Ref      |
| KJ489013 | Unassigned | Unassigned | Unassigned | 801_0  | Clustered | 4 VC_801_0   | 4   | 0.4828 | 0.99998705 | 0.4828 | 0 | 0 | 0 | 1 Ref      |
| KJ489397 | Unassigned | Unassigned | Unassigned | 883_0  | Clustered | 10 VC_883_0  | 10  | 0.2015 | 1          | 0.2015 | 0 | 0 | 0 | 1 Ref      |
| KJ489398 | Unassigned | Unassigned | Unassigned | 883_0  | Clustered | 10 VC_883_0  | 10  | 0.2015 | 1          | 0.2015 | 0 | 0 | 0 | 1 Ref      |
| KJ489399 | Unassigned | Unassigned | Unassigned | 884_0  | Clustered | 28 VC_884_0  | 28  | 0.6211 | 1          | 0.6211 | 0 | 0 | 0 | 0.9841 Ref |
| KJ489400 | Unassigned | Unassigned | Unassigned | 883_0  | Clustered | 10 VC_883_0  | 10  | 0.2015 | 1          | 0.2015 | 0 | 0 | 0 | 1 Ref      |
| KJ489401 | Unassigned | Unassigned | Unassigned | 884_0  | Clustered | 28 VC_884_0  | 28  | 0.6211 | 1          | 0.6211 | 0 | 0 | 0 | 0.9841 Ref |
| KJ489402 | Unassigned | Unassigned | Unassigned | 883_1  | Clustered | 12 VC_883_1  | 12  | 0.2441 | 1          | 0.2441 | 0 | 0 | 0 | 1 Ref      |
| KJ502657 | Unassigned | Unassigned | Unassigned | 1027_0 | Clustered | 20 VC_1027_0 | 20  | 0.7114 | 1          | 0.7114 | 0 | 0 | 0 | 1 Ref      |
| KJ507099 | Unassigned | Unassigned | Unassigned | 129_0  | Clustered | 43 VC_129_0  | 43  | 0.886  | 1          | 0.886  | 0 | 0 | 0 | 1 Ref      |
| KJ507100 | Unassigned | Unassigned | Unassigned | 697_0  | Clustered | 5 VC_697_0   | 5   | 0.8303 | 0.99999971 | 0.8303 | 0 | 0 | 0 | 1 Ref      |
| KJ510413 | Unassigned | Unassigned | Unassigned | 1046_0 | Clustered | 7 VC_1046_0  | 7   | 0.9413 | 1          | 0.9413 | 0 | 0 | 0 | 1 Ref      |
| KJ510414 | Unassigned | Unassigned | Unassigned | 517_1  | Clustered | 108 VC_517_1 | 108 | 0.8483 | 1          | 0.8483 | 0 | 0 | 0 | 0.9955 Ref |
| KJ510415 | Unassigned | Unassigned | Unassigned | 513_0  | Clustered | 32 VC_513_0  | 32  | 0.6881 | 1          | 0.6881 | 0 | 0 | 0 | 1 Ref      |
| KJ528544 | Unassigned | Unassigned | Unassigned | 97_0   | Clustered | 5 VC_97_0    | 5   | 0.0696 | 0.98113835 | 0.0683 | 0 | 0 | 0 | 1 Ref      |
| KJ535721 | Unassigned | Unassigned | Unassigned | 739_0  | Clustered | 26 VC_739_0  | 26  | 0.9571 | 1          | 0.9571 | 0 | 0 | 0 | 1 Ref      |
| KJ535722 | Unassigned | Unassigned | Unassigned | 739_0  | Clustered | 26 VC_739_0  | 26  | 0.9571 | 1          | 0.9571 | 0 | 0 | 0 | 1 Ref      |
| KJ538721 | Unassigned | Unassigned | Unassigned | 939_0  | Clustered | 15 VC_939_0  | 15  | 1      | 0          | 0      | 0 | 0 | 0 | 1 Ref      |
| KJ538722 | Unassigned | Unassigned | Unassigned | 810_0  | Clustered | 18 VC_810_0  | 18  | 0.9121 | 1          | 0.9121 | 0 | 0 | 0 | 1 Ref      |
| KJ538723 | Unassigned | Unassigned | Unassigned | 371_3  | Clustered | 22 VC_371_3  | 22  | 0.0787 | 1          | 0.0787 | 0 | 0 | 0 | 0.9048 Ref |
| KJ564036 | Unassigned | Unassigned | Unassigned | 640_0  | Clustered | 7 VC_640_0   | 7   | 0.9025 | 1          | 0.9025 | 0 | 0 | 0 | 1 Ref      |
| KJ564037 | Unassigned | Unassigned | Unassigned | 640_0  | Clustered | 7 VC_640_0   | 7   | 0.9025 | 1          | 0.9025 | 0 | 0 | 0 | 1 Ref      |
| KJ564038 | Unassigned | Unassigned | Unassigned | 640_0  | Clustered | 7 VC_640_0   | 7   | 0.9025 | 1          | 0.9025 | 0 | 0 | 0 | 1 Ref      |
| KJ567042 | Unassigned | Unassigned | Unassigned | 238_0  | Clustered | 17 VC_238_0  | 17  | 0.6109 | 1          | 0.6109 | 0 | 0 | 0 | 1 Ref      |
| KJ567043 | Unassigned | Unassigned | Unassigned | 563_0  | Clustered | 2 VC_563_0   | 2   | 0.0727 | 0.956426   | 0.0695 | 0 | 0 | 0 | 1 Ref      |
| KJ567044 | Unassigned | Unassigned | Unassigned | 371_2  | Clustered | 8 VC_371_2   | 8   | 0.0232 | 1          | 0.0232 | 0 | 0 | 0 | 0.8571 Ref |
| KJ567045 | Unassigned | Unassigned | Unassigned | 236_0  | Clustered | 72 VC_236_0  | 72  | 0.8104 | 1          | 0.8104 | 0 | 0 | 0 | 1 Ref      |
| KJ567046 | Unassigned | Unassigned | Unassigned | 567_0  | Clustered | 8 VC_567_0   | 8   | 0.4935 | 1          | 0.4935 | 0 | 0 | 0 | 1 Ref      |
| KJ572844 | Unassigned | Unassigned | Unassigned | 121_0  | Clustered | 4 VC_121_0   | 4   | 0.1814 | 0.99998531 | 0.1814 | 0 | 0 | 0 | 1 Ref      |
| KJ578758 | Unassigned | Unassigned | Unassigned | 765_0  | Clustered | 132 VC_765_0 | 132 | 1      | 1          | 1      | 0 | 0 | 0 | 1 Ref      |
| KJ578759 | Unassigned | Unassigned | Unassigned | 765_0  | Clustered | 132 VC_765_0 | 132 | 1      | 1          | 1      | 0 | 0 | 0 | 1 Ref      |
| KJ578760 | Unassigned | Unassigned | Unassigned | 765_0  | Clustered | 132 VC_765_0 | 132 | 1      | 1          | 1      | 0 | 0 | 0 | 1 Ref      |
| KJ578761 | Unassigned | Unassigned | Unassigned | 765_0  | Clustered | 132 VC_765_0 | 132 | 1      | 1          | 1      | 0 | 0 | 0 | 1 Ref      |
| KJ578762 | Unassigned | Unassigned | Unassigned | 765_0  | Clustered | 132 VC_765_0 | 132 | 1      | 1          | 1      | 0 | 0 | 0 | 1 Ref      |
| KJ578763 | Unassigned | Unassigned | Unassigned | 765_0  | Clustered | 132 VC_765_0 | 132 | 1      | 1          | 1      | 0 | 0 | 0 | 1 Ref      |
| KJ578764 | Unassigned | Unassigned | Unassigned | 765_0  | Clustered | 132 VC_765_0 | 132 | 1      | 1          | 1      | 0 | 0 | 0 | 1 Ref      |
| KJ578765 | Unassigned | Unassigned | Unassigned | 765_0  | Clustered | 132 VC_765_0 | 132 | 1      | 1          | 1      | 0 | 0 | 0 | 1 Ref      |
| KJ578766 | Unassigned | Unassigned | Unassigned | 765_0  | Clustered | 132 VC_765_0 | 132 | 1      | 1          | 1      | 0 | 0 | 0 | 1 Ref      |
| KJ578767 | Unassigned | Unassigned | Unassigned | 765_0  | Clustered | 132 VC_765_0 | 132 | 1      | 1          | 1      | 0 | 0 | 0 | 1 Ref      |
| KJ578768 | Unassigned | Unassigned | Unassigned | 765_0  | Clustered | 132 VC_765_0 | 132 | 1      | 1          | 1      | 0 | 0 | 0 | 1 Ref      |
| KJ578769 | Unassigned | Unassigned | Unassigned | 765_0  | Clustered | 132 VC_765_0 | 132 | 1      | 1          | 1      | 0 | 0 | 0 | 1 Ref      |
| KJ578770 | Unassigned | Unassigned | Unassigned | 765_0  | Clustered | 132 VC_765_0 | 132 | 1      | 1          | 1      | 0 | 0 | 0 | 1 Ref      |
| KJ578771 | Unassigned | Unassigned | Unassigned | 765_0  | Clustered | 132 VC_765_0 | 132 | 1      | 1          | 1      | 0 | 0 | 0 | 1 Ref      |
| KJ578772 | Unassigned | Unassigned | Unassigned | 765_0  | Clustered | 132 VC_765_0 | 132 | 1      | 1          | 1      | 0 | 0 | 0 | 1 Ref      |
| KJ578773 | Unassigned | Unassigned | Unassigned | 765_0  | Clustered | 132 VC_765_0 | 132 | 1      | 1          | 1      | 0 | 0 | 0 | 1 Ref      |
| KJ578774 | Unassigned | Unassigned | Unassigned | 765_0  | Clustered | 132 VC_765_0 | 132 | 1      | 1          | 1      | 0 | 0 | 0 | 1 Ref      |
| KJ578775 | Unassigned | Unassigned | Unassigned | 765_0  | Clustered | 132 VC_765_0 | 132 | 1      | 1          | 1      | 0 | 0 | 0 | 1 Ref      |
| KJ578776 | Unassigned | Unassigned | Unassigned | 765_0  | Clustered | 132 VC_765_0 | 132 | 1      | 1          | 1      | 0 | 0 | 0 | 1 Ref      |
| KJ578777 | Unassigned | Unassigned | Unassigned | 765_0  | Clustered | 132 VC_765_0 | 132 | 1      | 1          | 1      | 0 | 0 | 0 | 1 Ref      |
| KJ578778 | Unassigned | Unassigned | Unassigned | 765_0  | Clustered | 132 VC_765_0 | 132 | 1      | 1          | 1      | 0 | 0 | 0 | 1 Ref      |
| KJ578779 | Unassigned | Unassigned | Unassigned | 765_0  | Clustered | 132 VC_765_0 | 132 | 1      | 1          | 1      | 0 | 0 | 0 | 1 Ref      |
| KJ578780 | Unassigned | Unassigned | Unassigned | 765_0  | Clustered | 132 VC_765_0 | 132 | 1      | 1          | 1      | 0 | 0 | 0 | 1 Ref      |
| KJ578781 | Unassigned | Unassigned | Unassigned | 765_0  | Clustered | 132 VC_765_0 | 132 | 1      | 1          | 1      | 0 | 0 | 0 | 1 Ref      |
| KJ578782 | Unassigned | Unassigned | Unassigned | 765_0  | Clustered | 132 VC_765_0 | 132 | 1      | 1          | 1      | 0 | 0 | 0 | 1 Ref      |
| KJ578783 | Unassigned | Unassigned | Unassigned | 765_0  | Clustered | 132 VC_765_0 | 132 | 1      | 1          | 1      | 0 | 0 | 0 | 1 Ref      |
| KJ578784 | Unassigned | Unassigned | Unassigned | 765_0  | Clustered | 132 VC_765_0 | 132 | 1      | 1          | 1      | 0 | 0 | 0 | 1 Ref      |
| KJ578785 | Unassigned | Unassigned | Unassigned | 765_0  | Clustered | 132 VC_765_0 | 132 | 1      | 1          | 1      | 0 | 0 | 0 | 1 Ref      |
| KJ578786 | Unassigned | Unassigned | Unassigned | 765_0  | Clustered | 132 VC_765_0 | 132 | 1      | 1          | 1      | 0 | 0 | 0 | 1 Ref      |
| KJ578787 | Unassigned | Unassigned | Unassigned | 765_0  | Clustered | 132 VC_765_0 | 132 | 1      | 1          | 1      | 0 | 0 | 0 | 1 Ref      |
| KJ578788 | Unassigned | Unassigned | Unassigned | 765_0  | Clustered | 132 VC_765_0 | 132 | 1      | 1          | 1      | 0 | 0 | 0 | 1 Ref      |
| KJ578789 | Unassigned | Unassigned | Unassigned | 765_0  | Clustered | 132 VC_765_0 | 132 | 1      | 1          | 1      | 0 | 0 | 0 | 1 Ref      |
| KJ578790 | Unassigned | Unassigned | Unassigned | 765_0  | Clustered | 132 VC_765_0 | 132 | 1      | 1          | 1      | 0 | 0 | 0 | 1 Ref      |
| KJ578791 | Unassigned | Unassigned | Unassigned | 765_0  | Clustered | 132 VC_765_0 | 132 | 1      | 1          | 1      | 0 | 0 | 0 | 1 Ref      |
| KJ578792 | Unassigned | Unassigned | Unassigned | 765_0  | Clustered | 132 VC_765_0 | 132 | 1      | 1          | 1      | 0 | 0 | 0 | 1 Ref      |
| KJ586794 | Unassigned | Unassigned | Unassigned | 739_0  | Clustered | 26 VC_739_0  | 26  | 0.9571 | 1          | 0.9571 | 0 | 0 | 0 | 1 Ref      |
| KJ586795 | Unassigned | Unassigned | Unassigned | 739_0  | Clustered | 26 VC_739_0  | 26  | 0.9571 | 1          | 0.9571 | 0 | 0 | 0 | 1 Ref      |
| KJ591604 | Unassigned | Unassigned | Unassigned | 739_0  | Clustered | 26 VC_739_0  | 26  | 0.9571 | 1          | 0.9571 | 0 | 0 | 0 | 1 Ref      |
| KJ591605 | Unassigned | Unassigned | Unassigned | 739_0  | Clustered | 26 VC_739_0  | 26  | 0.9571 | 1          | 0.9571 | 0 | 0 | 0 | 1 Ref      |
| KJ595575 | Unassigned | Unassigned | Unassigned | 558_50 | Clustered | 15 VC_558_50 | 15  | 0.0468 | 1          | 0.0468 | 0 | 0 | 0 | 0.9238 Ref |
| KJ595576 | Unassigned | Unassigned | Unassigned | 371_1  | Clustered | 11 VC_371_1  | 11  | 0.0379 | 1          | 0.0379 | 0 | 0 | 0 | 0.8545 Ref |
| KJ596420 | Unassigned | Unassigned | Unassigned | 10_0   | Clustered | 25 VC_10_0   | 25  | 0.3467 | 1          | 0.3467 | 0 | 0 | 0 | 0.9733 Ref |
| KJ603229 | Unassigned | Unassigned | Unassigned | 46_0   | Clustered | 2 VC_46_0    | 2   | 0.0181 | 0.95763537 | 0.0173 | 0 | 0 | 0 | 1 Ref      |
| KJ608189 | Unassigned | Unassigned | Unassigned | 269_0  | Clustered | 3 VC_269_0   | 3   | 0.1948 | 0.99308177 | 0.1934 | 0 | 0 | 0 | 1 Ref      |
| KJ617393 | Unassigned | Unassigned | Unassigned | 1048_0 | Clustered | 3 VC_1048_0  | 3   | 1      | 1          | 1      | 0 | 0 | 0 | 1 Ref      |
| KJ619459 | Unassigned | Unassigned | Unassigned | 875_0  | Clustered | 10 VC_875_0  | 10  | 0.988  | 0.99948433 | 0.9875 | 0 | 0 | 0 | 1 Ref      |



|          |            |            |            |        |                     |              |     |        |            |        |   |   |   |            |
|----------|------------|------------|------------|--------|---------------------|--------------|-----|--------|------------|--------|---|---|---|------------|
| KJ621082 | Unassigned | Unassigned | Unassigned | 833_0  | Clustered           | 16 VC_833_0  | 16  | 0.9351 | 1          | 0.9351 | 0 | 0 | 0 | 1 Ref      |
| KJ628499 | Unassigned | Unassigned | Unassigned | 700_0  | Clustered           | 10 VC_700_0  | 10  | 0.8076 | 1          | 0.8076 | 0 | 0 | 0 | 1 Ref      |
| KJ668713 | Unassigned | Unassigned | Unassigned | 455_0  | Clustered           | 18 VC_455_0  | 18  | 0.4598 | 1          | 0.4598 | 0 | 0 | 0 | 1 Ref      |
| KJ668714 | Unassigned | Unassigned | Unassigned | 283_99 | Clustered/Singleton | 1 VC_283_99  | 1   | 0      | 1          | 0      | 0 | 0 | 0 | 1 Ref      |
| KJ668715 | Unassigned | Unassigned | Unassigned | 739_0  | Clustered           | 26 VC_739_0  | 26  | 0.9571 | 1          | 0.9571 | 0 | 0 | 0 | 1 Ref      |
| KJ676859 | Unassigned | Unassigned | Unassigned | 187_2  | Clustered           | 2 VC_187_2   | 2   | 0.0209 | 0.93057595 | 0.0195 | 0 | 0 | 0 | 1 Ref      |
| KJ690250 | Unassigned | Unassigned | Unassigned | 325_51 | Clustered           | 2 VC_325_51  | 2   | 0.0039 | 0.95663826 | 0.0037 | 0 | 0 | 0 | 1 Ref      |
| KJ716334 | Unassigned | Unassigned | Unassigned | 9_0    | Clustered           | 38 VC_9_0    | 38  | 0.4895 | 1          | 0.4895 | 0 | 0 | 0 | 1 Ref      |
| KJ716335 | Unassigned | Unassigned | Unassigned | 131_0  | Clustered           | 17 VC_131_0  | 17  | 0.2671 | 1          | 0.2671 | 0 | 0 | 0 | 1 Ref      |
| KJ722067 | Unassigned | Unassigned | Unassigned | 765_0  | Clustered           | 132 VC_765_0 | 132 | 1      | 1          | 1      | 0 | 0 | 0 | 1 Ref      |
| KJ725374 | Unassigned | Unassigned | Unassigned | 761_0  | Clustered           | 67 VC_761_0  | 67  | 0.8947 | 1          | 0.8947 | 0 | 0 | 0 | 1 Ref      |
| KJ746502 | Unassigned | Unassigned | Unassigned | 21_0   | Clustered           | 4 VC_21_0    | 4   | 0.5696 | 0.87262442 | 0.4971 | 0 | 0 | 0 | 0.6667 Ref |
| KJ748011 | Unassigned | Unassigned | Unassigned | 451_0  | Clustered           | 80 VC_451_0  | 80  | 0.9991 | 1          | 0.9991 | 0 | 0 | 0 | 1 Ref      |
| KJ801817 | Unassigned | Unassigned | Unassigned | 91_0   | Clustered           | 22 VC_91_0   | 22  | 0.5318 | 1          | 0.5318 | 0 | 0 | 0 | 1 Ref      |
| KJ802832 | Unassigned | Unassigned | Unassigned | 1049_0 | Clustered           | 8 VC_1049_0  | 8   | 0.6413 | 1          | 0.6413 | 0 | 0 | 0 | 1 Ref      |
| KJ803031 | Unassigned | Unassigned | Unassigned | 833_0  | Clustered           | 16 VC_833_0  | 16  | 0.9351 | 1          | 0.9351 | 0 | 0 | 0 | 1 Ref      |
| KJ804259 | Unassigned | Unassigned | Unassigned | 667_0  | Clustered           | 7 VC_667_0   | 7   | 0.4101 | 1          | 0.4101 | 0 | 0 | 0 | 1 Ref      |
| KJ817802 | Unassigned | Unassigned | Unassigned | 698_0  | Clustered           | 26 VC_698_0  | 26  | 0.9366 | 1          | 0.9366 | 0 | 0 | 0 | 1 Ref      |
| KJ829260 | Unassigned | Unassigned | Unassigned | 556_0  | Clustered           | 21 VC_556_0  | 21  | 0.9912 | 1          | 0.9912 | 0 | 0 | 0 | 1 Ref      |
| KJ832078 | Unassigned | Unassigned | Unassigned | 30_1   | Clustered           | 16 VC_30_1   | 16  | 0.1973 | 1          | 0.1973 | 0 | 0 | 0 | 0.8333 Ref |
| KJ858521 | Unassigned | Unassigned | Unassigned | 793_0  | Clustered           | 12 VC_793_0  | 12  | 0.8531 | 1          | 0.8531 | 0 | 0 | 0 | 1 Ref      |
| KJ888149 | Unassigned | Unassigned | Unassigned | 149_16 | Clustered/Singleton | 1 VC_149_16  | 1   | 0      | 1          | 0      | 0 | 0 | 0 | 1 Ref      |
| KJ909655 | Unassigned | Unassigned | Unassigned | 39_0   | Clustered           | 35 VC_39_0   | 35  | 0.4337 | 1          | 0.4337 | 0 | 0 | 0 | 1 Ref      |
| KJ936628 | Unassigned | Unassigned | Unassigned | 530_0  | Clustered           | 9 VC_530_0   | 9   | 0.8027 | 1          | 0.8027 | 0 | 0 | 0 | 1 Ref      |
| KJ944841 | Unassigned | Unassigned | Unassigned | 234_0  | Clustered           | 21 VC_234_0  | 21  | 0.8355 | 1          | 0.8355 | 0 | 0 | 0 | 1 Ref      |
| KJ959591 | Unassigned | Unassigned | Unassigned | 747_0  | Clustered           | 23 VC_747_0  | 23  | 0.8202 | 1          | 0.8202 | 0 | 0 | 0 | 1 Ref      |
| KJ959632 | Unassigned | Unassigned | Unassigned | 216_4  | Clustered           | 13 VC_216_4  | 13  | 0.1657 | 1          | 0.1657 | 0 | 0 | 0 | 1 Ref      |
| KJ997912 | Unassigned | Unassigned | Unassigned | 303_0  | Clustered           | 155 VC_303_0 | 155 | 0.9979 | 1          | 0.9979 | 0 | 0 | 0 | 1 Ref      |
| KM044272 | Unassigned | Unassigned | Unassigned | 813_1  | Clustered           | 24 VC_813_1  | 24  | 0.535  | 1          | 0.535  | 0 | 0 | 0 | 1 Ref      |
| KM051843 | Unassigned | Unassigned | Unassigned | 85_0   | Clustered           | 3 VC_85_0    | 3   | 0.0422 | 0.99823242 | 0.0421 | 0 | 0 | 0 | 1 Ref      |
| KM058087 | Unassigned | Unassigned | Unassigned | 1051_0 | Clustered           | 2 VC_1051_0  | 2   | 1      | 1          | 1      | 0 | 0 | 0 | 1 Ref      |
| KM067278 | Unassigned | Unassigned | Unassigned | 423_0  | Clustered           | 45 VC_423_0  | 45  | 0.9484 | 1          | 0.9484 | 0 | 0 | 0 | 1 Ref      |
| KM091442 | Unassigned | Unassigned | Unassigned | 202_0  | Clustered           | 102 VC_202_0 | 102 | 0.4049 | 1          | 0.4049 | 0 | 0 | 0 | 0.7876 Ref |
| KM092515 | Unassigned | Unassigned | Unassigned | 329_17 | Clustered           | 4 VC_329_17  | 4   | 0.0163 | 0.99996247 | 0.0163 | 0 | 0 | 0 | 1 Ref      |
| KM101117 | Unassigned | Unassigned | Unassigned | 508_0  | Clustered           | 32 VC_508_0  | 32  | 0.906  | 1          | 0.906  | 0 | 0 | 0 | 1 Ref      |
| KM101118 | Unassigned | Unassigned | Unassigned | 940_0  | Clustered           | 34 VC_940_0  | 34  | 0.7959 | 1          | 0.7959 | 0 | 0 | 0 | 1 Ref      |
| KM101119 | Unassigned | Unassigned | Unassigned | 514_0  | Clustered           | 75 VC_514_0  | 75  | 0.9402 | 1          | 0.9402 | 0 | 0 | 0 | 1 Ref      |
| KM101120 | Unassigned | Unassigned | Unassigned | 515_0  | Clustered           | 16 VC_515_0  | 16  | 0.3793 | 1          | 0.3793 | 0 | 0 | 0 | 1 Ref      |
| KM101122 | Unassigned | Unassigned | Unassigned | 520_49 | Clustered/Singleton | 1 VC_520_49  | 1   | 0      | 1          | 0      | 0 | 0 | 0 | 1 Ref      |
| KM101123 | Unassigned | Unassigned | Unassigned | 546_7  | Clustered           | 4 VC_546_7   | 4   | 0.041  | 0.9963251  | 0.0408 | 0 | 0 | 0 | 1 Ref      |
| KM190144 | Unassigned | Unassigned | Unassigned | 582_2  | Clustered/Singleton | 1 VC_582_2   | 1   | 0      | 1          | 0      | 0 | 0 | 0 | 1 Ref      |
| KM197169 | Unassigned | Unassigned | Unassigned | 216_4  | Clustered           | 13 VC_216_4  | 13  | 0.1657 | 1          | 0.1657 | 0 | 0 | 0 | 1 Ref      |
| KM199770 | Unassigned | Unassigned | Unassigned | 1052_3 | Clustered           | 5 VC_1052_3  | 5   | 0.185  | 0.98656048 | 0.1825 | 0 | 0 | 0 | 1 Ref      |
| KM199771 | Unassigned | Unassigned | Unassigned | 481_0  | Clustered           | 8 VC_481_0   | 8   | 0.1348 | 1          | 0.1348 | 0 | 0 | 0 | 1 Ref      |
| KM209228 | Unassigned | Unassigned | Unassigned | 131_0  | Clustered           | 17 VC_131_0  | 17  | 0.2671 | 1          | 0.2671 | 0 | 0 | 0 | 1 Ref      |
| KM209270 | Unassigned | Unassigned | Unassigned | 131_0  | Clustered           | 17 VC_131_0  | 17  | 0.2671 | 1          | 0.2671 | 0 | 0 | 0 | 1 Ref      |
| KM209320 | Unassigned | Unassigned | Unassigned | 131_0  | Clustered           | 17 VC_131_0  | 17  | 0.2671 | 1          | 0.2671 | 0 | 0 | 0 | 1 Ref      |
| KM216423 | Unassigned | Unassigned | Unassigned | 149_15 | Clustered           | 16 VC_149_15 | 16  | 0.0788 | 1          | 0.0788 | 0 | 0 | 0 | 0.8083 Ref |
| KM224878 | Unassigned | Unassigned | Unassigned | 754_0  | Clustered           | 8 VC_754_0   | 8   | 0.752  | 1          | 0.752  | 0 | 0 | 0 | 1 Ref      |
| KM224879 | Unassigned | Unassigned | Unassigned | 754_0  | Clustered           | 8 VC_754_0   | 8   | 0.752  | 1          | 0.752  | 0 | 0 | 0 | 1 Ref      |
| KM233151 | Unassigned | Unassigned | Unassigned | 835_0  | Clustered           | 67 VC_835_0  | 67  | 0.9624 | 1          | 0.9624 | 0 | 0 | 0 | 1 Ref      |
| KM233261 | Unassigned | Unassigned | Unassigned | 907_0  | Clustered           | 3 VC_907_0   | 3   | 0.6642 | 0.99633114 | 0.6618 | 0 | 0 | 0 | 1 Ref      |
| KM233454 | Unassigned | Unassigned | Unassigned | 514_0  | Clustered           | 75 VC_514_0  | 75  | 0.9402 | 1          | 0.9402 | 0 | 0 | 0 | 1 Ref      |
| KM233455 | Unassigned | Unassigned | Unassigned | 514_0  | Clustered           | 75 VC_514_0  | 75  | 0.9402 | 1          | 0.9402 | 0 | 0 | 0 | 1 Ref      |
| KM233689 | Unassigned | Unassigned | Unassigned | 179_0  | Clustered           | 53 VC_179_0  | 53  | 0.9137 | 1          | 0.9137 | 0 | 0 | 0 | 1 Ref      |
| KM236237 | Unassigned | Unassigned | Unassigned | 669_1  | Clustered           | 10 VC_669_1  | 10  | 0.1268 | 1          | 0.1268 | 0 | 0 | 0 | 0.9778 Ref |
| KM236239 | Unassigned | Unassigned | Unassigned | 330_0  | Clustered           | 27 VC_330_0  | 27  | 0.5088 | 1          | 0.5088 | 0 | 0 | 0 | 0.8661 Ref |
| KM236241 | Unassigned | Unassigned | Unassigned | 584_0  | Clustered           | 28 VC_584_0  | 28  | 0.7704 | 1          | 0.7704 | 0 | 0 | 0 | 1 Ref      |
| KM236242 | Unassigned | Unassigned | Unassigned | 780_0  | Clustered           | 8 VC_780_0   | 8   | 0.5207 | 1          | 0.5207 | 0 | 0 | 0 | 1 Ref      |
| KM236243 | Unassigned | Unassigned | Unassigned | 795_0  | Clustered           | 19 VC_795_0  | 19  | 0.6848 | 1          | 0.6848 | 0 | 0 | 0 | 1 Ref      |
| KM236244 | Unassigned | Unassigned | Unassigned | 191_19 | Clustered           | 12 VC_191_19 | 12  | 0.0655 | 1          | 0.0655 | 0 | 0 | 0 | 0.8636 Ref |
| KM236245 | Unassigned | Unassigned | Unassigned | 85_9   | Clustered/Singleton | 1 VC_85_9    | 1   | 0      | 1          | 0      | 0 | 0 | 0 | 1 Ref      |
| KM236246 | Unassigned | Unassigned | Unassigned | 85_7   | Clustered/Singleton | 1 VC_85_7    | 1   | 0      | 1          | 0      | 0 | 0 | 0 | 1 Ref      |
| KM236247 | Unassigned | Unassigned | Unassigned | 1032_0 | Clustered           | 7 VC_1032_0  | 7   | 0.9887 | 0.99999504 | 0.9887 | 0 | 0 | 0 | 1 Ref      |
| KM236248 | Unassigned | Unassigned | Unassigned | 1032_0 | Clustered           | 7 VC_1032_0  | 7   | 0.9887 | 0.99999504 | 0.9887 | 0 | 0 | 0 | 1 Ref      |
| KM236502 | Unassigned | Unassigned | Unassigned | 371_3  | Clustered           | 22 VC_371_3  | 22  | 0.0787 | 1          | 0.0787 | 0 | 0 | 0 | 0.9048 Ref |
| KM242061 | Unassigned | Unassigned | Unassigned | 392_0  | Clustered           | 126 VC_392_0 | 126 | 0.9621 | 1          | 0.9621 | 0 | 0 | 0 | 1 Ref      |
| KM247287 | Unassigned | Unassigned | Unassigned | 156_0  | Clustered           | 12 VC_156_0  | 12  | 0.9062 | 1          | 0.9062 | 0 | 0 | 0 | 1 Ref      |
| KM253764 | Unassigned | Unassigned | Unassigned | 385_0  | Clustered           | 51 VC_385_0  | 51  | 0.8754 | 1          | 0.8754 | 0 | 0 | 0 | 1 Ref      |
| KM262191 | Unassigned | Unassigned | Unassigned | 862_0  | Clustered           | 11 VC_862_0  | 11  | 0.6745 | 1          | 0.6745 | 0 | 0 | 0 | 1 Ref      |
| KM262192 | Unassigned | Unassigned | Unassigned | 862_0  | Clustered           | 11 VC_862_0  | 11  | 0.6745 | 1          | 0.6745 | 0 | 0 | 0 | 1 Ref      |
| KM272358 | Unassigned | Unassigned | Unassigned | 637_2  | Clustered           | 2 VC_637_2   | 2   | 0.0038 | 0.92844927 | 0.0035 | 0 | 0 | 0 | 1 Ref      |
| KM279937 | Unassigned | Unassigned | Unassigned | 520_56 | Clustered/Singleton | 1 VC_520_56  | 1   | 0      | 1          | 0      | 0 | 0 | 0 | 1 Ref      |
| KM289195 | Unassigned | Unassigned | Unassigned | 636_0  | Clustered           | 9 VC_636_0   | 9   | 0.2422 | 1          | 0.2422 | 0 | 0 | 0 | 0.9722 Ref |
| KM347889 | Unassigned | Unassigned | Unassigned | 520_68 | Clustered/Singleton | 1 VC_520_68  | 1   | 0      | 1          | 0      | 0 | 0 | 0 | 1 Ref      |
| KM347890 | Unassigned | Unassigned | Unassigned | 371_1  | Clustered           | 11 VC_371_1  | 11  | 0.0379 | 1          | 0.0379 | 0 | 0 | 0 | 0.8545 Ref |
| KM359505 | Unassigned | Unassigned | Unassigned | 432_8  | Clustered/Singleton | 1 VC_432_8   | 1   | 0      | 1          | 0      | 0 | 0 | 0 | 1 Ref      |
| KM360178 | Unassigned | Unassigned | Unassigned | 125_0  | Clustered           | 17 VC_125_0  | 17  | 0.9244 | 1          | 0.9244 | 0 | 0 | 0 | 1 Ref      |
| KM363596 | Unassigned | Unassigned | Unassigned | 238_0  | Clustered           | 17 VC_238_0  | 17  | 0.6109 | 1          | 0.6109 | 0 | 0 | 0 | 1 Ref      |
| KM363597 | Unassigned | Unassigned | Unassigned | 371_13 | Clustered           | 33 VC_371_13 | 33  | 0.179  | 1          | 0.179  | 0 | 0 | 0 | 0.8769 Ref |
| KM366096 | Unassigned | Unassigned | Unassigned | 386_0  | Clustered           | 49 VC_386_0  | 49  | 0.7941 | 1          | 0.7941 | 0 | 0 | 0 | 1 Ref      |



|          |            |            |            |         |                     |              |    |        |            |        |   |   |   |            |
|----------|------------|------------|------------|---------|---------------------|--------------|----|--------|------------|--------|---|---|---|------------|
| KM366097 | Unassigned | Unassigned | Unassigned | 452_0   | Clustered           | 66 VC_452_0  | 66 | 0.9248 | 1          | 0.9248 | 0 | 0 | 0 | 1 Ref      |
| KM366098 | Unassigned | Unassigned | Unassigned | 592_0   | Clustered           | 50 VC_592_0  | 50 | 0.7314 | 1          | 0.7314 | 0 | 0 | 0 | 1 Ref      |
| KM366099 | Unassigned | Unassigned | Unassigned | 428_0   | Clustered           | 33 VC_428_0  | 33 | 0.9915 | 1          | 0.9915 | 0 | 0 | 0 | 1 Ref      |
| KM366100 | Unassigned | Unassigned | Unassigned | 96_0    | Clustered           | 30 VC_96_0   | 30 | 0.718  | 1          | 0.718  | 0 | 0 | 0 | 1 Ref      |
| KM370384 | Unassigned | Unassigned | Unassigned | 452_0   | Clustered           | 66 VC_452_0  | 66 | 0.9248 | 1          | 0.9248 | 0 | 0 | 0 | 1 Ref      |
| KM373208 | Unassigned | Unassigned | Unassigned | 739_0   | Clustered           | 26 VC_739_0  | 26 | 0.9571 | 1          | 0.9571 | 0 | 0 | 0 | 1 Ref      |
| KM389210 | Unassigned | Unassigned | Unassigned | 297_0   | Clustered           | 5 VC_297_0   | 5  | 0.1056 | 0.99999993 | 0.1056 | 0 | 0 | 0 | 0.9 Ref    |
| KM400683 | Unassigned | Unassigned | Unassigned | 546_2   | Clustered           | 3 VC_546_2   | 3  | 0.0275 | 0.85260342 | 0.0234 | 0 | 0 | 0 | 1 Ref      |
| KM401838 | Unassigned | Unassigned | Unassigned | 223_0   | Clustered           | 38 VC_223_0  | 38 | 0.9095 | 1          | 0.9095 | 0 | 0 | 0 | 1 Ref      |
| KM402757 | Unassigned | Unassigned | Unassigned | 520_92  | Clustered           | 5 VC_520_92  | 5  | 0.0663 | 0.99999997 | 0.0663 | 0 | 0 | 0 | 1 Ref      |
| KM407600 | Unassigned | Unassigned | Unassigned | 286_10  | Clustered           | 9 VC_286_10  | 9  | 0.0615 | 0.99999878 | 0.0615 | 0 | 0 | 0 | 0.6667 Ref |
| KM408320 | Unassigned | Unassigned | Unassigned | 371_15  | Clustered           | 44 VC_371_15 | 44 | 0.1391 | 1          | 0.1391 | 0 | 0 | 0 | 0.7474 Ref |
| KM411958 | Unassigned | Unassigned | Unassigned | 838_0   | Clustered           | 29 VC_838_0  | 29 | 0.8611 | 1          | 0.8611 | 0 | 0 | 0 | 1 Ref      |
| KM411959 | Unassigned | Unassigned | Unassigned | 838_0   | Clustered           | 29 VC_838_0  | 29 | 0.8611 | 1          | 0.8611 | 0 | 0 | 0 | 1 Ref      |
| KM411960 | Unassigned | Unassigned | Unassigned | 838_0   | Clustered           | 29 VC_838_0  | 29 | 0.8611 | 1          | 0.8611 | 0 | 0 | 0 | 1 Ref      |
| KM434184 | Unassigned | Unassigned | Unassigned | 79_8    | Clustered/Singleton | 1 VC_79_8    | 1  | 0      | 1          | 0      | 0 | 0 | 0 | 1 Ref      |
| KM434185 | Unassigned | Unassigned | Unassigned | 749_0   | Clustered           | 40 VC_749_0  | 40 | 0.7517 | 1          | 0.7517 | 0 | 0 | 0 | 1 Ref      |
| KM434186 | Unassigned | Unassigned | Unassigned | 77_0    | Clustered           | 20 VC_77_0   | 20 | 0.9657 | 1          | 0.9657 | 0 | 0 | 0 | 1 Ref      |
| KM458633 | Unassigned | Unassigned | Unassigned | 592_0   | Clustered           | 50 VC_592_0  | 50 | 0.7314 | 1          | 0.7314 | 0 | 0 | 0 | 1 Ref      |
| KM463009 | Unassigned | Unassigned | Unassigned | 216_6   | Clustered           | 42 VC_216_6  | 42 | 0.473  | 1          | 0.473  | 0 | 0 | 0 | 0.8351 Ref |
| KM501444 | Unassigned | Unassigned | Unassigned | 283_145 | Clustered/Singleton | 1 VC_283_145 | 1  | 0      | 1          | 0      | 0 | 0 | 0 | 1 Ref      |
| KM507819 | Unassigned | Unassigned | Unassigned | 164_11  | Clustered           | 10 VC_164_11 | 10 | 0.1507 | 1          | 0.1507 | 0 | 0 | 0 | 0.9111 Ref |
| KM576124 | Unassigned | Unassigned | Unassigned | 111_0   | Clustered           | 91 VC_111_0  | 91 | 0.9587 | 1          | 0.9587 | 0 | 0 | 0 | 1 Ref      |
| KM581061 | Unassigned | Unassigned | Unassigned | 593_0   | Clustered           | 5 VC_593_0   | 5  | 0.4608 | 0.99999995 | 0.4608 | 0 | 0 | 0 | 1 Ref      |
| KM588359 | Unassigned | Unassigned | Unassigned | 521_0   | Clustered           | 37 VC_521_0  | 37 | 0.912  | 1          | 0.912  | 0 | 0 | 0 | 1 Ref      |
| KM589498 | Unassigned | Unassigned | Unassigned | 1054_0  | Clustered           | 12 VC_1054_0 | 12 | 0.2863 | 0.99746644 | 0.2855 | 0 | 0 | 0 | 1 Ref      |
| KM589499 | Unassigned | Unassigned | Unassigned | 1061_0  | Clustered           | 2 VC_1061_0  | 2  | 0.7065 | 0.76024994 | 0.5371 | 0 | 0 | 0 | 1 Ref      |
| KM589500 | Unassigned | Unassigned | Unassigned | 1062_0  | Clustered           | 45 VC_1062_0 | 45 | 0.9734 | 0.50949847 | 0.4959 | 0 | 0 | 0 | 1 Ref      |
| KM589502 | Unassigned | Unassigned | Unassigned | 995_0   | Clustered           | 69 VC_995_0  | 69 | 0.8547 | 1          | 0.8547 | 0 | 0 | 0 | 1 Ref      |
| KM589503 | Unassigned | Unassigned | Unassigned | 1062_0  | Clustered           | 45 VC_1062_0 | 45 | 0.9734 | 0.50949847 | 0.4959 | 0 | 0 | 0 | 1 Ref      |
| KM589504 | Unassigned | Unassigned | Unassigned | 1062_0  | Clustered           | 45 VC_1062_0 | 45 | 0.9734 | 0.50949847 | 0.4959 | 0 | 0 | 0 | 1 Ref      |
| KM589505 | Unassigned | Unassigned | Unassigned | 1062_0  | Clustered           | 45 VC_1062_0 | 45 | 0.9734 | 0.50949847 | 0.4959 | 0 | 0 | 0 | 1 Ref      |
| KM589507 | Unassigned | Unassigned | Unassigned | 1061_0  | Clustered           | 2 VC_1061_0  | 2  | 0.7065 | 0.76024994 | 0.5371 | 0 | 0 | 0 | 1 Ref      |
| KM589508 | Unassigned | Unassigned | Unassigned | 1066_0  | Clustered           | 52 VC_1066_0 | 52 | 0.7682 | 1          | 0.7682 | 0 | 0 | 0 | 1 Ref      |
| KM589509 | Unassigned | Unassigned | Unassigned | 1062_0  | Clustered           | 45 VC_1062_0 | 45 | 0.9734 | 0.50949847 | 0.4959 | 0 | 0 | 0 | 1 Ref      |
| KM589510 | Unassigned | Unassigned | Unassigned | 1062_0  | Clustered           | 45 VC_1062_0 | 45 | 0.9734 | 0.50949847 | 0.4959 | 0 | 0 | 0 | 1 Ref      |
| KM589511 | Unassigned | Unassigned | Unassigned | 995_0   | Clustered           | 69 VC_995_0  | 69 | 0.8547 | 1          | 0.8547 | 0 | 0 | 0 | 1 Ref      |
| KM589512 | Unassigned | Unassigned | Unassigned | 1062_0  | Clustered           | 45 VC_1062_0 | 45 | 0.9734 | 0.50949847 | 0.4959 | 0 | 0 | 0 | 1 Ref      |
| KM589513 | Unassigned | Unassigned | Unassigned | 1062_0  | Clustered           | 45 VC_1062_0 | 45 | 0.9734 | 0.50949847 | 0.4959 | 0 | 0 | 0 | 1 Ref      |
| KM589514 | Unassigned | Unassigned | Unassigned | 1068_0  | Clustered           | 5 VC_1068_0  | 5  | 1      | 1          | 1      | 0 | 0 | 0 | 1 Ref      |
| KM589515 | Unassigned | Unassigned | Unassigned | 1069_0  | Clustered           | 4 VC_1069_0  | 4  | 1      | 1          | 1      | 0 | 0 | 0 | 1 Ref      |
| KM589516 | Unassigned | Unassigned | Unassigned | 1069_0  | Clustered           | 4 VC_1069_0  | 4  | 1      | 1          | 1      | 0 | 0 | 0 | 1 Ref      |
| KM591905 | Unassigned | Unassigned | Unassigned | 1046_0  | Clustered           | 7 VC_1046_0  | 7  | 0.9413 | 1          | 0.9413 | 0 | 0 | 0 | 1 Ref      |
| KM591906 | Unassigned | Unassigned | Unassigned | 216_6   | Clustered           | 42 VC_216_6  | 42 | 0.473  | 1          | 0.473  | 0 | 0 | 0 | 0.8351 Ref |
| KM592966 | Unassigned | Unassigned | Unassigned | 513_0   | Clustered           | 32 VC_513_0  | 32 | 0.6881 | 1          | 0.6881 | 0 | 0 | 0 | 1 Ref      |
| KM597530 | Unassigned | Unassigned | Unassigned | 520_29  | Clustered/Singleton | 1 VC_520_29  | 1  | 0      | 1          | 0      | 0 | 0 | 0 | 1 Ref      |
| KM597531 | Unassigned | Unassigned | Unassigned | 325_35  | Clustered           | 17 VC_325_35 | 17 | 0.0732 | 1          | 0.0732 | 0 | 0 | 0 | 0.7721 Ref |
| KM606994 | Unassigned | Unassigned | Unassigned | 283_82  | Clustered           | 6 VC_283_82  | 6  | 0.013  | 1          | 0.013  | 0 | 0 | 0 | 1 Ref      |
| KM606995 | Unassigned | Unassigned | Unassigned | 283_82  | Clustered           | 6 VC_283_82  | 6  | 0.013  | 1          | 0.013  | 0 | 0 | 0 | 1 Ref      |
| KM606996 | Unassigned | Unassigned | Unassigned | 283_82  | Clustered           | 6 VC_283_82  | 6  | 0.013  | 1          | 0.013  | 0 | 0 | 0 | 1 Ref      |
| KM606997 | Unassigned | Unassigned | Unassigned | 283_82  | Clustered           | 6 VC_283_82  | 6  | 0.013  | 1          | 0.013  | 0 | 0 | 0 | 1 Ref      |
| KM606998 | Unassigned | Unassigned | Unassigned | 283_82  | Clustered           | 6 VC_283_82  | 6  | 0.013  | 1          | 0.013  | 0 | 0 | 0 | 1 Ref      |
| KM606999 | Unassigned | Unassigned | Unassigned | 283_82  | Clustered           | 6 VC_283_82  | 6  | 0.013  | 1          | 0.013  | 0 | 0 | 0 | 1 Ref      |
| KM607000 | Unassigned | Unassigned | Unassigned | 283_83  | Clustered/Singleton | 1 VC_283_83  | 1  | 0      | 1          | 0      | 0 | 0 | 0 | 1 Ref      |
| KM607001 | Unassigned | Unassigned | Unassigned | 283_94  | Clustered           | 2 VC_283_94  | 2  | 0.0026 | 0.95293762 | 0.0025 | 0 | 0 | 0 | 1 Ref      |
| KM607002 | Unassigned | Unassigned | Unassigned | 283_91  | Clustered           | 11 VC_283_91 | 11 | 0.0285 | 1          | 0.0285 | 0 | 0 | 0 | 1 Ref      |
| KM607003 | Unassigned | Unassigned | Unassigned | 283_91  | Clustered           | 11 VC_283_91 | 11 | 0.0285 | 1          | 0.0285 | 0 | 0 | 0 | 1 Ref      |
| KM607004 | Unassigned | Unassigned | Unassigned | 283_3   | Clustered           | 3 VC_283_3   | 3  | 0.0055 | 0.9968017  | 0.0055 | 0 | 0 | 0 | 1 Ref      |
| KM612259 | Unassigned | Unassigned | Unassigned | 607_0   | Clustered           | 16 VC_607_0  | 16 | 0.9179 | 1          | 0.9179 | 0 | 0 | 0 | 1 Ref      |
| KM612260 | Unassigned | Unassigned | Unassigned | 607_0   | Clustered           | 16 VC_607_0  | 16 | 0.9179 | 1          | 0.9179 | 0 | 0 | 0 | 1 Ref      |
| KM612261 | Unassigned | Unassigned | Unassigned | 607_0   | Clustered           | 16 VC_607_0  | 16 | 0.9179 | 1          | 0.9179 | 0 | 0 | 0 | 1 Ref      |
| KM612262 | Unassigned | Unassigned | Unassigned | 607_0   | Clustered           | 16 VC_607_0  | 16 | 0.9179 | 1          | 0.9179 | 0 | 0 | 0 | 1 Ref      |
| KM612263 | Unassigned | Unassigned | Unassigned | 607_0   | Clustered           | 16 VC_607_0  | 16 | 0.9179 | 1          | 0.9179 | 0 | 0 | 0 | 1 Ref      |
| KM612264 | Unassigned | Unassigned | Unassigned | 607_0   | Clustered           | 16 VC_607_0  | 16 | 0.9179 | 1          | 0.9179 | 0 | 0 | 0 | 1 Ref      |
| KM612265 | Unassigned | Unassigned | Unassigned | 607_0   | Clustered           | 16 VC_607_0  | 16 | 0.9179 | 1          | 0.9179 | 0 | 0 | 0 | 1 Ref      |
| KM652553 | Unassigned | Unassigned | Unassigned | 520_19  | Clustered           | 2 VC_520_19  | 2  | 0.0098 | 0.95761552 | 0.0094 | 0 | 0 | 0 | 1 Ref      |
| KM652554 | Unassigned | Unassigned | Unassigned | 1071_3  | Clustered           | 16 VC_1071_3 | 16 | 0.2354 | 1          | 0.2354 | 0 | 0 | 0 | 0.9667 Ref |
| KM657822 | Unassigned | Unassigned | Unassigned | 329_13  | Clustered/Singleton | 1 VC_329_13  | 1  | 0      | 1          | 0      | 0 | 0 | 0 | 1 Ref      |
| KM672662 | Unassigned | Unassigned | Unassigned | 702_0   | Clustered           | 5 VC_702_0   | 5  | 0.7794 | 0.99999988 | 0.7794 | 0 | 0 | 0 | 1 Ref      |
| KM677185 | Unassigned | Unassigned | Unassigned | 474_0   | Clustered           | 14 VC_474_0  | 14 | 0.8466 | 1          | 0.8466 | 0 | 0 | 0 | 1 Ref      |
| KM677210 | Unassigned | Unassigned | Unassigned | 216_4   | Clustered           | 13 VC_216_4  | 13 | 0.1657 | 1          | 0.1657 | 0 | 0 | 0 | 1 Ref      |
| KM677211 | Unassigned | Unassigned | Unassigned | 236_0   | Clustered           | 72 VC_236_0  | 72 | 0.8104 | 1          | 0.8104 | 0 | 0 | 0 | 1 Ref      |
| KM819694 | Unassigned | Unassigned | Unassigned | 112_0   | Clustered           | 8 VC_112_0   | 8  | 0.2537 | 1          | 0.2537 | 0 | 0 | 0 | 1 Ref      |
| KM819695 | Unassigned | Unassigned | Unassigned | 452_0   | Clustered           | 66 VC_452_0  | 66 | 0.9248 | 1          | 0.9248 | 0 | 0 | 0 | 1 Ref      |
| KM819696 | Unassigned | Unassigned | Unassigned | 452_0   | Clustered           | 66 VC_452_0  | 66 | 0.9248 | 1          | 0.9248 | 0 | 0 | 0 | 1 Ref      |
| KM873719 | Unassigned | Unassigned | Unassigned | 912_0   | Clustered           | 76 VC_912_0  | 76 | 0.979  | 1          | 0.979  | 0 | 0 | 0 | 1 Ref      |
| KM879463 | Unassigned | Unassigned | Unassigned | 1074_0  | Clustered           | 19 VC_1074_0 | 19 | 0.9198 | 1          | 0.9198 | 0 | 0 | 0 | 1 Ref      |
| KM881426 | Unassigned | Unassigned | Unassigned | 558_50  | Clustered           | 15 VC_558_50 | 15 | 0.0468 | 1          | 0.0468 | 0 | 0 | 0 | 0.9238 Ref |
| KM896878 | Unassigned | Unassigned | Unassigned | 835_0   | Clustered           | 67 VC_835_0  | 67 | 0.9624 | 1          | 0.9624 | 0 | 0 | 0 | 1 Ref      |
| KM923970 | Unassigned | Unassigned | Unassigned | 761_0   | Clustered           | 67 VC_761_0  | 67 | 0.8947 | 1          | 0.8947 | 0 | 0 | 0 | 1 Ref      |
| KM923971 | Unassigned | Unassigned | Unassigned | 238_0   | Clustered           | 17 VC_238_0  | 17 | 0.6109 | 1          | 0.6109 | 0 | 0 | 0 | 1 Ref      |



|          |            |            |            |        |                     |              |     |        |            |        |   |   |   |            |
|----------|------------|------------|------------|--------|---------------------|--------------|-----|--------|------------|--------|---|---|---|------------|
| KM925136 | Unassigned | Unassigned | Unassigned | 546_3  | Clustered           | 4 VC_546_3   | 4   | 0.0418 | 0.92194988 | 0.0385 | 0 | 0 | 0 | 1 Ref      |
| KM974184 | Unassigned | Unassigned | Unassigned | 838_0  | Clustered           | 29 VC_838_0  | 29  | 0.8611 | 1          | 0.8611 | 0 | 0 | 0 | 1 Ref      |
| KM979354 | Unassigned | Unassigned | Unassigned | 190_22 | Clustered           | 3 VC_190_22  | 3   | 0.0186 | 0.9985967  | 0.0185 | 0 | 0 | 0 | 1 Ref      |
| KM979355 | Unassigned | Unassigned | Unassigned | 190_22 | Clustered           | 3 VC_190_22  | 3   | 0.0186 | 0.9985967  | 0.0185 | 0 | 0 | 0 | 1 Ref      |
| KM983328 | Unassigned | Unassigned | Unassigned | 649_0  | Clustered           | 3 VC_649_0   | 3   | 0.3028 | 0.99838615 | 0.3023 | 0 | 0 | 0 | 1 Ref      |
| KM983330 | Unassigned | Unassigned | Unassigned | 142_0  | Clustered           | 2 VC_142_0   | 2   | 0.4597 | 0.94273135 | 0.4334 | 0 | 0 | 0 | 1 Ref      |
| KM983331 | Unassigned | Unassigned | Unassigned | 649_0  | Clustered           | 3 VC_649_0   | 3   | 0.3028 | 0.99838615 | 0.3023 | 0 | 0 | 0 | 1 Ref      |
| KM983333 | Unassigned | Unassigned | Unassigned | 142_0  | Clustered           | 2 VC_142_0   | 2   | 0.4597 | 0.94273135 | 0.4334 | 0 | 0 | 0 | 1 Ref      |
| KM983334 | Unassigned | Unassigned | Unassigned | 649_0  | Clustered           | 3 VC_649_0   | 3   | 0.3028 | 0.99838615 | 0.3023 | 0 | 0 | 0 | 1 Ref      |
| KP007359 | Unassigned | Unassigned | Unassigned | 290_4  | Clustered           | 2 VC_290_4   | 2   | 0.0092 | 0.90346068 | 0.0083 | 0 | 0 | 0 | 1 Ref      |
| KP007360 | Unassigned | Unassigned | Unassigned | 290_1  | Clustered           | 8 VC_290_1   | 8   | 0.0757 | 1          | 0.0757 | 0 | 0 | 0 | 0.8571 Ref |
| KP007361 | Unassigned | Unassigned | Unassigned | 290_2  | Clustered           | 2 VC_290_2   | 2   | 0.0102 | 0.92371007 | 0.0094 | 0 | 0 | 0 | 1 Ref      |
| KP007362 | Unassigned | Unassigned | Unassigned | 290_3  | Clustered           | 2 VC_290_3   | 2   | 0.0102 | 0.92273843 | 0.0094 | 0 | 0 | 0 | 1 Ref      |
| KP010268 | Unassigned | Unassigned | Unassigned | 50_0   | Clustered           | 9 VC_50_0    | 9   | 0.5531 | 1          | 0.5531 | 0 | 0 | 0 | 1 Ref      |
| KP010413 | Unassigned | Unassigned | Unassigned | 329_11 | Clustered           | 15 VC_329_11 | 15  | 0.0791 | 1          | 0.0791 | 0 | 0 | 0 | 0.9333 Ref |
| KP017310 | Unassigned | Unassigned | Unassigned | 514_0  | Clustered           | 75 VC_514_0  | 75  | 0.9402 | 1          | 0.9402 | 0 | 0 | 0 | 1 Ref      |
| KP017311 | Unassigned | Unassigned | Unassigned | 514_0  | Clustered           | 75 VC_514_0  | 75  | 0.9402 | 1          | 0.9402 | 0 | 0 | 0 | 1 Ref      |
| KP025626 | Unassigned | Unassigned | Unassigned | 130_0  | Clustered           | 19 VC_130_0  | 19  | 0.6068 | 1          | 0.6068 | 0 | 0 | 0 | 1 Ref      |
| KP027195 | Unassigned | Unassigned | Unassigned | 764_0  | Clustered           | 4 VC_764_0   | 4   | 0.3556 | 0.99997469 | 0.3556 | 0 | 0 | 0 | 1 Ref      |
| KP027196 | Unassigned | Unassigned | Unassigned | 325_29 | Clustered           | 3 VC_325_29  | 3   | 0.0115 | 0.99857442 | 0.0115 | 0 | 0 | 0 | 1 Ref      |
| KP027197 | Unassigned | Unassigned | Unassigned | 371_18 | Clustered           | 10 VC_371_18 | 10  | 0.0302 | 1          | 0.0302 | 0 | 0 | 0 | 0.8 Ref    |
| KP027198 | Unassigned | Unassigned | Unassigned | 517_1  | Clustered           | 108 VC_517_1 | 108 | 0.8483 | 1          | 0.8483 | 0 | 0 | 0 | 0.9955 Ref |
| KP027199 | Unassigned | Unassigned | Unassigned | 237_1  | Clustered           | 13 VC_237_1  | 13  | 0.1773 | 1          | 0.1773 | 0 | 0 | 0 | 0.7308 Ref |
| KP027200 | Unassigned | Unassigned | Unassigned | 519_0  | Clustered           | 39 VC_519_0  | 39  | 0.8156 | 1          | 0.8156 | 0 | 0 | 0 | 1 Ref      |
| KP027201 | Unassigned | Unassigned | Unassigned | 518_1  | Clustered           | 2 VC_518_1   | 2   | 0.0376 | 0.95718761 | 0.036  | 0 | 0 | 0 | 1 Ref      |
| KP027202 | Unassigned | Unassigned | Unassigned | 514_0  | Clustered           | 75 VC_514_0  | 75  | 0.9402 | 1          | 0.9402 | 0 | 0 | 0 | 1 Ref      |
| KP027203 | Unassigned | Unassigned | Unassigned | 325_29 | Clustered           | 3 VC_325_29  | 3   | 0.0115 | 0.99857442 | 0.0115 | 0 | 0 | 0 | 1 Ref      |
| KP027204 | Unassigned | Unassigned | Unassigned | 325_8  | Clustered           | 2 VC_325_8   | 2   | 0.0093 | 0.95751268 | 0.0089 | 0 | 0 | 0 | 1 Ref      |
| KP027205 | Unassigned | Unassigned | Unassigned | 325_40 | Clustered           | 2 VC_325_40  | 2   | 0.004  | 0.95574341 | 0.0038 | 0 | 0 | 0 | 1 Ref      |
| KP027207 | Unassigned | Unassigned | Unassigned | 509_0  | Clustered           | 37 VC_509_0  | 37  | 0.9689 | 1          | 0.9689 | 0 | 0 | 0 | 1 Ref      |
| KP027208 | Unassigned | Unassigned | Unassigned | 371_15 | Clustered           | 44 VC_371_15 | 44  | 0.1391 | 1          | 0.1391 | 0 | 0 | 0 | 0.7474 Ref |
| KP027209 | Unassigned | Unassigned | Unassigned | 371_18 | Clustered           | 10 VC_371_18 | 10  | 0.0302 | 1          | 0.0302 | 0 | 0 | 0 | 0.8 Ref    |
| KP027446 | Unassigned | Unassigned | Unassigned | 149_20 | Clustered/Singleton | 1 VC_149_20  | 1   | 0      | 1          | 0      | 0 | 0 | 0 | 1 Ref      |
| KP027447 | Unassigned | Unassigned | Unassigned | 150_0  | Clustered           | 13 VC_150_0  | 13  | 0.2417 | 1          | 0.2417 | 0 | 0 | 0 | 0.9872 Ref |
| KP057620 | Unassigned | Unassigned | Unassigned | 517_1  | Clustered           | 108 VC_517_1 | 108 | 0.8483 | 1          | 0.8483 | 0 | 0 | 0 | 0.9955 Ref |
| KP063118 | Unassigned | Unassigned | Unassigned | 591_0  | Clustered           | 14 VC_591_0  | 14  | 0.5184 | 1          | 0.5184 | 0 | 0 | 0 | 1 Ref      |
| KP063541 | Unassigned | Unassigned | Unassigned | 229_0  | Clustered           | 32 VC_229_0  | 32  | 0.9119 | 1          | 0.9119 | 0 | 0 | 0 | 1 Ref      |
| KP064094 | Unassigned | Unassigned | Unassigned | 795_0  | Clustered           | 19 VC_795_0  | 19  | 0.6848 | 1          | 0.6848 | 0 | 0 | 0 | 1 Ref      |
| KP085586 | Unassigned | Unassigned | Unassigned | 575_0  | Clustered           | 35 VC_575_0  | 35  | 0.8815 | 1          | 0.8815 | 0 | 0 | 0 | 1 Ref      |
| KP087938 | Unassigned | Unassigned | Unassigned | 1077_0 | Clustered           | 48 VC_1077_0 | 48  | 0.8525 | 1          | 0.8525 | 0 | 0 | 0 | 1 Ref      |
| KP087939 | Unassigned | Unassigned | Unassigned | 398_0  | Clustered           | 48 VC_398_0  | 48  | 0.4813 | 1          | 0.4813 | 0 | 0 | 0 | 1 Ref      |
| KP087942 | Unassigned | Unassigned | Unassigned | 1077_0 | Clustered           | 48 VC_1077_0 | 48  | 0.8525 | 1          | 0.8525 | 0 | 0 | 0 | 1 Ref      |
| KP087943 | Unassigned | Unassigned | Unassigned | 1086_0 | Clustered           | 3 VC_1086_0  | 3   | 0.8416 | 0.81445332 | 0.6855 | 0 | 0 | 0 | 1 Ref      |
| KP087945 | Unassigned | Unassigned | Unassigned | 398_0  | Clustered           | 48 VC_398_0  | 48  | 0.4813 | 1          | 0.4813 | 0 | 0 | 0 | 1 Ref      |
| KP087948 | Unassigned | Unassigned | Unassigned | 1062_0 | Clustered           | 45 VC_1062_0 | 45  | 0.9734 | 0.50949847 | 0.4959 | 0 | 0 | 0 | 1 Ref      |
| KP087951 | Unassigned | Unassigned | Unassigned | 1086_0 | Clustered           | 3 VC_1086_0  | 3   | 0.8416 | 0.81445332 | 0.6855 | 0 | 0 | 0 | 1 Ref      |
| KP087953 | Unassigned | Unassigned | Unassigned | 1087_0 | Clustered           | 5 VC_1087_0  | 5   | 0.8109 | 0.98759579 | 0.8008 | 0 | 0 | 0 | 1 Ref      |
| KP087954 | Unassigned | Unassigned | Unassigned | 992_0  | Clustered           | 8 VC_992_0   | 8   | 0.3873 | 1          | 0.3873 | 0 | 0 | 0 | 1 Ref      |
| KP087955 | Unassigned | Unassigned | Unassigned | 1088_0 | Clustered           | 3 VC_1088_0  | 3   | 0.7739 | 0.82711071 | 0.6401 | 0 | 0 | 0 | 1 Ref      |
| KP087957 | Unassigned | Unassigned | Unassigned | 1086_0 | Clustered           | 3 VC_1086_0  | 3   | 0.8416 | 0.81445332 | 0.6855 | 0 | 0 | 0 | 1 Ref      |
| KP090453 | Unassigned | Unassigned | Unassigned | 386_0  | Clustered           | 49 VC_386_0  | 49  | 0.7941 | 1          | 0.7941 | 0 | 0 | 0 | 1 Ref      |
| KP090454 | Unassigned | Unassigned | Unassigned | 386_0  | Clustered           | 49 VC_386_0  | 49  | 0.7941 | 1          | 0.7941 | 0 | 0 | 0 | 1 Ref      |
| KP137432 | Unassigned | Unassigned | Unassigned | 4_0    | Clustered           | 7 VC_4_0     | 7   | 0.7912 | 1          | 0.7912 | 0 | 0 | 0 | 1 Ref      |
| KP137433 | Unassigned | Unassigned | Unassigned | 718_0  | Clustered           | 4 VC_718_0   | 4   | 0.6393 | 0.99996676 | 0.6393 | 0 | 0 | 0 | 0.8333 Ref |
| KP137434 | Unassigned | Unassigned | Unassigned | 4_0    | Clustered           | 7 VC_4_0     | 7   | 0.7912 | 1          | 0.7912 | 0 | 0 | 0 | 1 Ref      |
| KP137435 | Unassigned | Unassigned | Unassigned | 718_0  | Clustered           | 4 VC_718_0   | 4   | 0.6393 | 0.99996676 | 0.6393 | 0 | 0 | 0 | 0.8333 Ref |
| KP137436 | Unassigned | Unassigned | Unassigned | 4_0    | Clustered           | 7 VC_4_0     | 7   | 0.7912 | 1          | 0.7912 | 0 | 0 | 0 | 1 Ref      |
| KP137437 | Unassigned | Unassigned | Unassigned | 718_0  | Clustered           | 4 VC_718_0   | 4   | 0.6393 | 0.99996676 | 0.6393 | 0 | 0 | 0 | 0.8333 Ref |
| KP137438 | Unassigned | Unassigned | Unassigned | 4_0    | Clustered           | 7 VC_4_0     | 7   | 0.7912 | 1          | 0.7912 | 0 | 0 | 0 | 1 Ref      |
| KP137439 | Unassigned | Unassigned | Unassigned | 718_0  | Clustered           | 4 VC_718_0   | 4   | 0.6393 | 0.99996676 | 0.6393 | 0 | 0 | 0 | 0.8333 Ref |
| KP137440 | Unassigned | Unassigned | Unassigned | 181_0  | Clustered           | 5 VC_181_0   | 5   | 0.1168 | 0.99999995 | 0.1168 | 0 | 0 | 0 | 1 Ref      |
| KP143762 | Unassigned | Unassigned | Unassigned | 329_1  | Clustered           | 17 VC_329_1  | 17  | 0.0867 | 1          | 0.0867 | 0 | 0 | 0 | 0.8235 Ref |
| KP143763 | Unassigned | Unassigned | Unassigned | 190_0  | Clustered           | 2 VC_190_0   | 2   | 0.0087 | 0.95763473 | 0.0083 | 0 | 0 | 0 | 1 Ref      |
| KP144388 | Unassigned | Unassigned | Unassigned | 211_1  | Clustered/Singleton | 1 VC_211_1   | 1   | 0      | 1          | 0      | 0 | 0 | 0 | 1 Ref      |
| KP202158 | Unassigned | Unassigned | Unassigned | 490_4  | Clustered/Singleton | 1 VC_490_4   | 1   | 0      | 1          | 0      | 0 | 0 | 0 | 1 Ref      |
| KP202969 | Unassigned | Unassigned | Unassigned | 171_0  | Clustered           | 8 VC_171_0   | 8   | 0.5884 | 1          | 0.5884 | 0 | 0 | 0 | 1 Ref      |
| KP202970 | Unassigned | Unassigned | Unassigned | 171_0  | Clustered           | 8 VC_171_0   | 8   | 0.5884 | 1          | 0.5884 | 0 | 0 | 0 | 1 Ref      |
| KP202971 | Unassigned | Unassigned | Unassigned | 1090_0 | Clustered           | 4 VC_1090_0  | 4   | 1      | 1          | 1      | 0 | 0 | 0 | 1 Ref      |
| KP202972 | Unassigned | Unassigned | Unassigned | 708_0  | Clustered           | 47 VC_708_0  | 47  | 0.8654 | 1          | 0.8654 | 0 | 0 | 0 | 1 Ref      |
| KP208803 | Unassigned | Unassigned | Unassigned | 317_3  | Clustered/Singleton | 1 VC_317_3   | 1   | 0      | 1          | 0      | 0 | 0 | 0 | 1 Ref      |
| KP209285 | Unassigned | Unassigned | Unassigned | 12_0   | Clustered           | 21 VC_12_0   | 21  | 0.2274 | 1          | 0.2274 | 0 | 0 | 0 | 0.9571 Ref |
| KP233880 | Unassigned | Unassigned | Unassigned | 472_0  | Clustered           | 47 VC_472_0  | 47  | 0.9025 | 1          | 0.9025 | 0 | 0 | 0 | 1 Ref      |
| KP238129 | Unassigned | Unassigned | Unassigned | 446_0  | Clustered           | 4 VC_446_0   | 4   | 0.754  | 0.99987768 | 0.7539 | 0 | 0 | 0 | 1 Ref      |
| KP273225 | Unassigned | Unassigned | Unassigned | 219_0  | Clustered           | 5 VC_219_0   | 5   | 0.08   | 0.99999998 | 0.08   | 0 | 0 | 0 | 1 Ref      |
| KP280062 | Unassigned | Unassigned | Unassigned | 784_0  | Clustered           | 6 VC_784_0   | 6   | 0.5517 | 1          | 0.5517 | 0 | 0 | 0 | 1 Ref      |
| KP280063 | Unassigned | Unassigned | Unassigned | 971_0  | Clustered           | 3 VC_971_0   | 3   | 0.0548 | 0.99838914 | 0.0547 | 0 | 0 | 0 | 1 Ref      |
| KP282673 | Unassigned | Unassigned | Unassigned | 791_0  | Clustered           | 3 VC_791_0   | 3   | 1      | 1          | 1      | 0 | 0 | 0 | 1 Ref      |
| KP282674 | Unassigned | Unassigned | Unassigned | 791_0  | Clustered           | 3 VC_791_0   | 3   | 1      | 1          | 1      | 0 | 0 | 0 | 1 Ref      |
| KP282675 | Unassigned | Unassigned | Unassigned | 348_0  | Clustered           | 22 VC_348_0  | 22  | 0.9602 | 1          | 0.9602 | 0 | 0 | 0 | 1 Ref      |
| KP282677 | Unassigned | Unassigned | Unassigned | 446_0  | Clustered           | 4 VC_446_0   | 4   | 0.754  | 0.99987768 | 0.7539 | 0 | 0 | 0 | 1 Ref      |
| KP282678 | Unassigned | Unassigned | Unassigned | 446_0  | Clustered           | 4 VC_446_0   | 4   | 0.754  | 0.99987768 | 0.7539 | 0 | 0 | 0 | 1 Ref      |



|          |            |            |            |        |           |              |     |        |            |        |   |   |   |            |
|----------|------------|------------|------------|--------|-----------|--------------|-----|--------|------------|--------|---|---|---|------------|
| KP282679 | Unassigned | Unassigned | Unassigned | 881_0  | Clustered | 2 VC_881_0   | 2   | 0.6781 | 0.91813282 | 0.6226 | 0 | 0 | 0 | 1 Ref      |
| KP282680 | Unassigned | Unassigned | Unassigned | 881_0  | Clustered | 2 VC_881_0   | 2   | 0.6781 | 0.91813282 | 0.6226 | 0 | 0 | 0 | 1 Ref      |
| KP296791 | Unassigned | Unassigned | Unassigned | 708_0  | Clustered | 47 VC_708_0  | 47  | 0.8654 | 1          | 0.8654 | 0 | 0 | 0 | 1 Ref      |
| KP296793 | Unassigned | Unassigned | Unassigned | 708_0  | Clustered | 47 VC_708_0  | 47  | 0.8654 | 1          | 0.8654 | 0 | 0 | 0 | 1 Ref      |
| KP296794 | Unassigned | Unassigned | Unassigned | 708_0  | Clustered | 47 VC_708_0  | 47  | 0.8654 | 1          | 0.8654 | 0 | 0 | 0 | 1 Ref      |
| KP296795 | Unassigned | Unassigned | Unassigned | 708_0  | Clustered | 47 VC_708_0  | 47  | 0.8654 | 1          | 0.8654 | 0 | 0 | 0 | 1 Ref      |
| KP296796 | Unassigned | Unassigned | Unassigned | 708_0  | Clustered | 47 VC_708_0  | 47  | 0.8654 | 1          | 0.8654 | 0 | 0 | 0 | 1 Ref      |
| KP308307 | Unassigned | Unassigned | Unassigned | 813_1  | Clustered | 24 VC_813_1  | 24  | 0.535  | 1          | 0.535  | 0 | 0 | 0 | 1 Ref      |
| KP313531 | Unassigned | Unassigned | Unassigned | 385_0  | Clustered | 51 VC_385_0  | 51  | 0.8754 | 1          | 0.8754 | 0 | 0 | 0 | 1 Ref      |
| KP313532 | Unassigned | Unassigned | Unassigned | 751_0  | Clustered | 4 VC_751_0   | 4   | 0.1763 | 0.99998526 | 0.1763 | 0 | 0 | 0 | 1 Ref      |
| KP339049 | Unassigned | Unassigned | Unassigned | 92_0   | Clustered | 22 VC_92_0   | 22  | 0.5639 | 1          | 0.5639 | 0 | 0 | 0 | 1 Ref      |
| KP340287 | Unassigned | Unassigned | Unassigned | 79_0   | Clustered | 64 VC_79_0   | 64  | 0.4185 | 1          | 0.4185 | 0 | 0 | 0 | 0.7649 Ref |
| KP340288 | Unassigned | Unassigned | Unassigned | 79_0   | Clustered | 64 VC_79_0   | 64  | 0.4185 | 1          | 0.4185 | 0 | 0 | 0 | 0.7649 Ref |
| KP343639 | Unassigned | Unassigned | Unassigned | 83_0   | Clustered | 6 VC_83_0    | 6   | 0.6436 | 1          | 0.6436 | 0 | 0 | 0 | 1 Ref      |
| KP399677 | Unassigned | Unassigned | Unassigned | 380_0  | Clustered | 3 VC_380_0   | 3   | 0.1631 | 0.99675097 | 0.1625 | 0 | 0 | 0 | 1 Ref      |
| KP399678 | Unassigned | Unassigned | Unassigned | 378_0  | Clustered | 9 VC_378_0   | 9   | 0.7603 | 1          | 0.7603 | 0 | 0 | 0 | 1 Ref      |
| KP411017 | Unassigned | Unassigned | Unassigned | 1032_0 | Clustered | 7 VC_1032_0  | 7   | 0.9887 | 0.99999504 | 0.9887 | 0 | 0 | 0 | 1 Ref      |
| KP658157 | Unassigned | Unassigned | Unassigned | 938_0  | Clustered | 99 VC_938_0  | 99  | 0.9119 | 1          | 0.9119 | 0 | 0 | 0 | 0.9928 Ref |
| KP671755 | Unassigned | Unassigned | Unassigned | 531_0  | Clustered | 9 VC_531_0   | 9   | 0.26   | 1          | 0.26   | 0 | 0 | 0 | 1 Ref      |
| KP682371 | Unassigned | Unassigned | Unassigned | 42_0   | Clustered | 49 VC_42_0   | 49  | 0.4517 | 1          | 0.4517 | 0 | 0 | 0 | 0.8597 Ref |
| KP682372 | Unassigned | Unassigned | Unassigned | 39_0   | Clustered | 35 VC_39_0   | 35  | 0.4337 | 1          | 0.4337 | 0 | 0 | 0 | 1 Ref      |
| KP682373 | Unassigned | Unassigned | Unassigned | 39_0   | Clustered | 35 VC_39_0   | 35  | 0.4337 | 1          | 0.4337 | 0 | 0 | 0 | 1 Ref      |
| KP682374 | Unassigned | Unassigned | Unassigned | 42_0   | Clustered | 49 VC_42_0   | 49  | 0.4517 | 1          | 0.4517 | 0 | 0 | 0 | 0.8597 Ref |
| KP682375 | Unassigned | Unassigned | Unassigned | 39_0   | Clustered | 35 VC_39_0   | 35  | 0.4337 | 1          | 0.4337 | 0 | 0 | 0 | 1 Ref      |
| KP682376 | Unassigned | Unassigned | Unassigned | 39_0   | Clustered | 35 VC_39_0   | 35  | 0.4337 | 1          | 0.4337 | 0 | 0 | 0 | 1 Ref      |
| KP682377 | Unassigned | Unassigned | Unassigned | 39_0   | Clustered | 35 VC_39_0   | 35  | 0.4337 | 1          | 0.4337 | 0 | 0 | 0 | 1 Ref      |
| KP682378 | Unassigned | Unassigned | Unassigned | 39_0   | Clustered | 35 VC_39_0   | 35  | 0.4337 | 1          | 0.4337 | 0 | 0 | 0 | 1 Ref      |
| KP682379 | Unassigned | Unassigned | Unassigned | 39_0   | Clustered | 35 VC_39_0   | 35  | 0.4337 | 1          | 0.4337 | 0 | 0 | 0 | 1 Ref      |
| KP682380 | Unassigned | Unassigned | Unassigned | 39_0   | Clustered | 35 VC_39_0   | 35  | 0.4337 | 1          | 0.4337 | 0 | 0 | 0 | 1 Ref      |
| KP682382 | Unassigned | Unassigned | Unassigned | 39_0   | Clustered | 35 VC_39_0   | 35  | 0.4337 | 1          | 0.4337 | 0 | 0 | 0 | 1 Ref      |
| KP682383 | Unassigned | Unassigned | Unassigned | 39_0   | Clustered | 35 VC_39_0   | 35  | 0.4337 | 1          | 0.4337 | 0 | 0 | 0 | 1 Ref      |
| KP682384 | Unassigned | Unassigned | Unassigned | 39_0   | Clustered | 35 VC_39_0   | 35  | 0.4337 | 1          | 0.4337 | 0 | 0 | 0 | 1 Ref      |
| KP682385 | Unassigned | Unassigned | Unassigned | 39_0   | Clustered | 35 VC_39_0   | 35  | 0.4337 | 1          | 0.4337 | 0 | 0 | 0 | 1 Ref      |
| KP682386 | Unassigned | Unassigned | Unassigned | 39_0   | Clustered | 35 VC_39_0   | 35  | 0.4337 | 1          | 0.4337 | 0 | 0 | 0 | 1 Ref      |
| KP682387 | Unassigned | Unassigned | Unassigned | 39_0   | Clustered | 35 VC_39_0   | 35  | 0.4337 | 1          | 0.4337 | 0 | 0 | 0 | 1 Ref      |
| KP682388 | Unassigned | Unassigned | Unassigned | 39_0   | Clustered | 35 VC_39_0   | 35  | 0.4337 | 1          | 0.4337 | 0 | 0 | 0 | 1 Ref      |
| KP682389 | Unassigned | Unassigned | Unassigned | 39_0   | Clustered | 35 VC_39_0   | 35  | 0.4337 | 1          | 0.4337 | 0 | 0 | 0 | 1 Ref      |
| KP682390 | Unassigned | Unassigned | Unassigned | 39_0   | Clustered | 35 VC_39_0   | 35  | 0.4337 | 1          | 0.4337 | 0 | 0 | 0 | 1 Ref      |
| KP682391 | Unassigned | Unassigned | Unassigned | 39_0   | Clustered | 35 VC_39_0   | 35  | 0.4337 | 1          | 0.4337 | 0 | 0 | 0 | 1 Ref      |
| KP682392 | Unassigned | Unassigned | Unassigned | 39_0   | Clustered | 35 VC_39_0   | 35  | 0.4337 | 1          | 0.4337 | 0 | 0 | 0 | 1 Ref      |
| KP687431 | Unassigned | Unassigned | Unassigned | 149_8  | Clustered | 66 VC_149_8  | 66  | 0.4565 | 1          | 0.4565 | 0 | 0 | 0 | 0.8182 Ref |
| KP687432 | Unassigned | Unassigned | Unassigned | 149_8  | Clustered | 66 VC_149_8  | 66  | 0.4565 | 1          | 0.4565 | 0 | 0 | 0 | 0.8182 Ref |
| KP708985 | Unassigned | Unassigned | Unassigned | 111_0  | Clustered | 91 VC_111_0  | 91  | 0.9587 | 1          | 0.9587 | 0 | 0 | 0 | 1 Ref      |
| KP708986 | Unassigned | Unassigned | Unassigned | 111_0  | Clustered | 91 VC_111_0  | 91  | 0.9587 | 1          | 0.9587 | 0 | 0 | 0 | 1 Ref      |
| KP719132 | Unassigned | Unassigned | Unassigned | 722_0  | Clustered | 13 VC_722_0  | 13  | 0.5104 | 1          | 0.5104 | 0 | 0 | 0 | 1 Ref      |
| KP719133 | Unassigned | Unassigned | Unassigned | 722_0  | Clustered | 13 VC_722_0  | 13  | 0.5104 | 1          | 0.5104 | 0 | 0 | 0 | 1 Ref      |
| KP719134 | Unassigned | Unassigned | Unassigned | 722_0  | Clustered | 13 VC_722_0  | 13  | 0.5104 | 1          | 0.5104 | 0 | 0 | 0 | 1 Ref      |
| KP790008 | Unassigned | Unassigned | Unassigned | 867_0  | Clustered | 6 VC_867_0   | 6   | 0.3202 | 1          | 0.3202 | 0 | 0 | 0 | 1 Ref      |
| KP790009 | Unassigned | Unassigned | Unassigned | 867_0  | Clustered | 6 VC_867_0   | 6   | 0.3202 | 1          | 0.3202 | 0 | 0 | 0 | 1 Ref      |
| KP790010 | Unassigned | Unassigned | Unassigned | 867_0  | Clustered | 6 VC_867_0   | 6   | 0.3202 | 1          | 0.3202 | 0 | 0 | 0 | 1 Ref      |
| KP790011 | Unassigned | Unassigned | Unassigned | 406_0  | Clustered | 11 VC_406_0  | 11  | 0.9449 | 1          | 0.9449 | 0 | 0 | 0 | 1 Ref      |
| KP791805 | Unassigned | Unassigned | Unassigned | 385_0  | Clustered | 51 VC_385_0  | 51  | 0.8754 | 1          | 0.8754 | 0 | 0 | 0 | 1 Ref      |
| KP791806 | Unassigned | Unassigned | Unassigned | 385_0  | Clustered | 51 VC_385_0  | 51  | 0.8754 | 1          | 0.8754 | 0 | 0 | 0 | 1 Ref      |
| KP791807 | Unassigned | Unassigned | Unassigned | 385_0  | Clustered | 51 VC_385_0  | 51  | 0.8754 | 1          | 0.8754 | 0 | 0 | 0 | 1 Ref      |
| KP792623 | Unassigned | Unassigned | Unassigned | 806_0  | Clustered | 3 VC_806_0   | 3   | 0.532  | 0.99824026 | 0.5311 | 0 | 0 | 0 | 1 Ref      |
| KP793104 | Unassigned | Unassigned | Unassigned | 202_0  | Clustered | 102 VC_202_0 | 102 | 0.4049 | 1          | 0.4049 | 0 | 0 | 0 | 0.7876 Ref |
| KP793105 | Unassigned | Unassigned | Unassigned | 202_0  | Clustered | 102 VC_202_0 | 102 | 0.4049 | 1          | 0.4049 | 0 | 0 | 0 | 0.7876 Ref |
| KP793108 | Unassigned | Unassigned | Unassigned | 202_0  | Clustered | 102 VC_202_0 | 102 | 0.4049 | 1          | 0.4049 | 0 | 0 | 0 | 0.7876 Ref |
| KP793109 | Unassigned | Unassigned | Unassigned | 202_0  | Clustered | 102 VC_202_0 | 102 | 0.4049 | 1          | 0.4049 | 0 | 0 | 0 | 0.7876 Ref |
| KP793111 | Unassigned | Unassigned | Unassigned | 202_0  | Clustered | 102 VC_202_0 | 102 | 0.4049 | 1          | 0.4049 | 0 | 0 | 0 | 0.7876 Ref |
| KP793113 | Unassigned | Unassigned | Unassigned | 202_0  | Clustered | 102 VC_202_0 | 102 | 0.4049 | 1          | 0.4049 | 0 | 0 | 0 | 0.7876 Ref |
| KP793115 | Unassigned | Unassigned | Unassigned | 202_0  | Clustered | 102 VC_202_0 | 102 | 0.4049 | 1          | 0.4049 | 0 | 0 | 0 | 0.7876 Ref |
| KP793116 | Unassigned | Unassigned | Unassigned | 202_0  | Clustered | 102 VC_202_0 | 102 | 0.4049 | 1          | 0.4049 | 0 | 0 | 0 | 0.7876 Ref |
| KP793117 | Unassigned | Unassigned | Unassigned | 202_0  | Clustered | 102 VC_202_0 | 102 | 0.4049 | 1          | 0.4049 | 0 | 0 | 0 | 0.7876 Ref |
| KP793118 | Unassigned | Unassigned | Unassigned | 202_0  | Clustered | 102 VC_202_0 | 102 | 0.4049 | 1          | 0.4049 | 0 | 0 | 0 | 0.7876 Ref |
| KP793123 | Unassigned | Unassigned | Unassigned | 202_0  | Clustered | 102 VC_202_0 | 102 | 0.4049 | 1          | 0.4049 | 0 | 0 | 0 | 0.7876 Ref |
| KP793124 | Unassigned | Unassigned | Unassigned | 202_0  | Clustered | 102 VC_202_0 | 102 | 0.4049 | 1          | 0.4049 | 0 | 0 | 0 | 0.7876 Ref |
| KP793129 | Unassigned | Unassigned | Unassigned | 202_0  | Clustered | 102 VC_202_0 | 102 | 0.4049 | 1          | 0.4049 | 0 | 0 | 0 | 0.7876 Ref |
| KP793134 | Unassigned | Unassigned | Unassigned | 202_0  | Clustered | 102 VC_202_0 | 102 | 0.4049 | 1          | 0.4049 | 0 | 0 | 0 | 0.7876 Ref |
| KP797973 | Unassigned | Unassigned | Unassigned | 133_9  | Clustered | 3 VC_133_9   | 3   | 0.0099 | 0.98457109 | 0.0098 | 0 | 0 | 0 | 1 Ref      |
| KP836355 | Unassigned | Unassigned | Unassigned | 1091_0 | Clustered | 2 VC_1091_0  | 2   | 1      | 1          | 1      | 0 | 0 | 0 | 1 Ref      |
| KP836356 | Unassigned | Unassigned | Unassigned | 1091_0 | Clustered | 2 VC_1091_0  | 2   | 1      | 1          | 1      | 0 | 0 | 0 | 1 Ref      |
| KP861229 | Unassigned | Unassigned | Unassigned | 698_0  | Clustered | 26 VC_698_0  | 26  | 0.9366 | 1          | 0.9366 | 0 | 0 | 0 | 1 Ref      |
| KP861230 | Unassigned | Unassigned | Unassigned | 696_1  | Clustered | 8 VC_696_1   | 8   | 0.5452 | 1          | 0.5452 | 0 | 0 | 0 | 0.9286 Ref |
| KP861231 | Unassigned | Unassigned | Unassigned | 698_0  | Clustered | 26 VC_698_0  | 26  | 0.9366 | 1          | 0.9366 | 0 | 0 | 0 | 1 Ref      |
| KP869100 | Unassigned | Unassigned | Unassigned | 329_7  | Clustered | 18 VC_329_7  | 18  | 0.0938 | 1          | 0.0938 | 0 | 0 | 0 | 0.7778 Ref |
| KP869101 | Unassigned | Unassigned | Unassigned | 286_17 | Clustered | 8 VC_286_17  | 8   | 0.0535 | 0.99997829 | 0.0535 | 0 | 0 | 0 | 0.6071 Ref |
| KP869102 | Unassigned | Unassigned | Unassigned | 772_15 | Clustered | 5 VC_772_15  | 5   | 0.0243 | 0.76144861 | 0.0185 | 0 | 0 | 0 | 0.9 Ref    |
| KP869103 | Unassigned | Unassigned | Unassigned | 772_15 | Clustered | 5 VC_772_15  | 5   | 0.0243 | 0.76144861 | 0.0185 | 0 | 0 | 0 | 0.9 Ref    |
| KP869104 | Unassigned | Unassigned | Unassigned | 286_17 | Clustered | 8 VC_286_17  | 8   | 0.0535 | 0.99997829 | 0.0535 | 0 | 0 | 0 | 0.6071 Ref |
| KP869105 | Unassigned | Unassigned | Unassigned | 283_2  | Clustered | 2 VC_283_2   | 2   | 0.0027 | 0.93842619 | 0.0025 | 0 | 0 | 0 | 1 Ref      |



|          |            |            |            |        |                     |              |    |        |            |        |   |   |   |        |     |
|----------|------------|------------|------------|--------|---------------------|--------------|----|--------|------------|--------|---|---|---|--------|-----|
| KP869106 | Unassigned | Unassigned | Unassigned | 329_7  | Clustered           | 18 VC_329_7  | 18 | 0.0938 | 1          | 0.0938 | 0 | 0 | 0 | 0.7778 | Ref |
| KP869107 | Unassigned | Unassigned | Unassigned | 476_0  | Clustered           | 19 VC_476_0  | 19 | 0.7814 | 1          | 0.7814 | 0 | 0 | 0 | 1      | Ref |
| KP869108 | Unassigned | Unassigned | Unassigned | 476_0  | Clustered           | 19 VC_476_0  | 19 | 0.7814 | 1          | 0.7814 | 0 | 0 | 0 | 1      | Ref |
| KP869109 | Unassigned | Unassigned | Unassigned | 329_7  | Clustered           | 18 VC_329_7  | 18 | 0.0938 | 1          | 0.0938 | 0 | 0 | 0 | 0.7778 | Ref |
| KP869110 | Unassigned | Unassigned | Unassigned | 329_7  | Clustered           | 18 VC_329_7  | 18 | 0.0938 | 1          | 0.0938 | 0 | 0 | 0 | 0.7778 | Ref |
| KP869111 | Unassigned | Unassigned | Unassigned | 286_17 | Clustered           | 8 VC_286_17  | 8  | 0.0535 | 0.99997829 | 0.0535 | 0 | 0 | 0 | 0.6071 | Ref |
| KP869112 | Unassigned | Unassigned | Unassigned | 772_15 | Clustered           | 5 VC_772_15  | 5  | 0.0243 | 0.76144861 | 0.0185 | 0 | 0 | 0 | 0.9    | Ref |
| KP869113 | Unassigned | Unassigned | Unassigned | 329_7  | Clustered           | 18 VC_329_7  | 18 | 0.0938 | 1          | 0.0938 | 0 | 0 | 0 | 0.7778 | Ref |
| KP876465 | Unassigned | Unassigned | Unassigned | 975_0  | Clustered           | 11 VC_975_0  | 11 | 0.9687 | 1          | 0.9687 | 0 | 0 | 0 | 1      | Ref |
| KP876466 | Unassigned | Unassigned | Unassigned | 975_0  | Clustered           | 11 VC_975_0  | 11 | 0.9687 | 1          | 0.9687 | 0 | 0 | 0 | 1      | Ref |
| KP881232 | Unassigned | Unassigned | Unassigned | 1052_1 | Clustered/Singleton | 1 VC_1052_1  | 1  | 0      | 1          | 0      | 0 | 0 | 0 | 1      | Ref |
| KP881332 | Unassigned | Unassigned | Unassigned | 153_0  | Clustered           | 25 VC_153_0  | 25 | 0.7729 | 1          | 0.7729 | 0 | 0 | 0 | 1      | Ref |
| KP890822 | Unassigned | Unassigned | Unassigned | 452_0  | Clustered           | 66 VC_452_0  | 66 | 0.9248 | 1          | 0.9248 | 0 | 0 | 0 | 1      | Ref |
| KP890823 | Unassigned | Unassigned | Unassigned | 288_3  | Clustered           | 3 VC_288_3   | 3  | 0.0452 | 0.99844025 | 0.0452 | 0 | 0 | 0 | 1      | Ref |
| KP893289 | Unassigned | Unassigned | Unassigned | 12_0   | Clustered           | 21 VC_12_0   | 21 | 0.2274 | 1          | 0.2274 | 0 | 0 | 0 | 0.9571 | Ref |
| KP893290 | Unassigned | Unassigned | Unassigned | 12_2   | Clustered           | 19 VC_12_2   | 19 | 0.2018 | 1          | 0.2018 | 0 | 0 | 0 | 1      | Ref |
| KP966108 | Unassigned | Unassigned | Unassigned | 1_0    | Clustered           | 54 VC_1_0    | 54 | 0.8527 | 1          | 0.8527 | 0 | 0 | 0 | 1      | Ref |
| KP972568 | Unassigned | Unassigned | Unassigned | 875_0  | Clustered           | 10 VC_875_0  | 10 | 0.988  | 0.99948433 | 0.9875 | 0 | 0 | 0 | 1      | Ref |
| KP972569 | Unassigned | Unassigned | Unassigned | 875_0  | Clustered           | 10 VC_875_0  | 10 | 0.988  | 0.99948433 | 0.9875 | 0 | 0 | 0 | 1      | Ref |
| KP994390 | Unassigned | Unassigned | Unassigned | 838_0  | Clustered           | 29 VC_838_0  | 29 | 0.8611 | 1          | 0.8611 | 0 | 0 | 0 | 1      | Ref |
| KP994596 | Unassigned | Unassigned | Unassigned | 644_0  | Clustered           | 5 VC_644_0   | 5  | 0.6649 | 0.99999975 | 0.6649 | 0 | 0 | 0 | 1      | Ref |
| KR011062 | Unassigned | Unassigned | Unassigned | 866_2  | Clustered           | 3 VC_866_2   | 3  | 0.046  | 0.99850411 | 0.046  | 0 | 0 | 0 | 1      | Ref |
| KR011063 | Unassigned | Unassigned | Unassigned | 866_2  | Clustered           | 3 VC_866_2   | 3  | 0.046  | 0.99850411 | 0.046  | 0 | 0 | 0 | 1      | Ref |
| KR011064 | Unassigned | Unassigned | Unassigned | 866_2  | Clustered           | 3 VC_866_2   | 3  | 0.046  | 0.99850411 | 0.046  | 0 | 0 | 0 | 1      | Ref |
| KR014248 | Unassigned | Unassigned | Unassigned | 329_4  | Clustered           | 2 VC_329_4   | 2  | 0.0052 | 0.95746454 | 0.005  | 0 | 0 | 0 | 1      | Ref |
| KR029086 | Unassigned | Unassigned | Unassigned | 371_13 | Clustered           | 33 VC_371_13 | 33 | 0.179  | 1          | 0.179  | 0 | 0 | 0 | 0.8769 | Ref |
| KR029087 | Unassigned | Unassigned | Unassigned | 371_13 | Clustered           | 33 VC_371_13 | 33 | 0.179  | 1          | 0.179  | 0 | 0 | 0 | 0.8769 | Ref |
| KR049063 | Unassigned | Unassigned | Unassigned | 91_0   | Clustered           | 22 VC_91_0   | 22 | 0.5318 | 1          | 0.5318 | 0 | 0 | 0 | 1      | Ref |
| KR052142 | Unassigned | Unassigned | Unassigned | 838_0  | Clustered           | 29 VC_838_0  | 29 | 0.8611 | 1          | 0.8611 | 0 | 0 | 0 | 1      | Ref |
| KR052143 | Unassigned | Unassigned | Unassigned | 76_0   | Clustered           | 37 VC_76_0   | 37 | 0.9403 | 1          | 0.9403 | 0 | 0 | 0 | 1      | Ref |
| KR052480 | Unassigned | Unassigned | Unassigned | 437_0  | Clustered           | 4 VC_437_0   | 4  | 0.552  | 0.99998233 | 0.552  | 0 | 0 | 0 | 1      | Ref |
| KR052481 | Unassigned | Unassigned | Unassigned | 437_0  | Clustered           | 4 VC_437_0   | 4  | 0.552  | 0.99998233 | 0.552  | 0 | 0 | 0 | 1      | Ref |
| KR052482 | Unassigned | Unassigned | Unassigned | 437_0  | Clustered           | 4 VC_437_0   | 4  | 0.552  | 0.99998233 | 0.552  | 0 | 0 | 0 | 1      | Ref |
| KR053195 | Unassigned | Unassigned | Unassigned | 726_0  | Clustered           | 3 VC_726_0   | 3  | 0.0381 | 0.88955608 | 0.0339 | 0 | 0 | 0 | 1      | Ref |
| KR053197 | Unassigned | Unassigned | Unassigned | 949_0  | Clustered           | 10 VC_949_0  | 10 | 0.5977 | 1          | 0.5977 | 0 | 0 | 0 | 1      | Ref |
| KR053198 | Unassigned | Unassigned | Unassigned | 949_0  | Clustered           | 10 VC_949_0  | 10 | 0.5977 | 1          | 0.5977 | 0 | 0 | 0 | 1      | Ref |
| KR053201 | Unassigned | Unassigned | Unassigned | 767_0  | Clustered           | 34 VC_767_0  | 34 | 0.9173 | 1          | 0.9173 | 0 | 0 | 0 | 1      | Ref |
| KR054028 | Unassigned | Unassigned | Unassigned | 80_0   | Clustered           | 41 VC_80_0   | 41 | 0.5837 | 1          | 0.5837 | 0 | 0 | 0 | 0.9805 | Ref |
| KR054029 | Unassigned | Unassigned | Unassigned | 472_0  | Clustered           | 47 VC_472_0  | 47 | 0.9025 | 1          | 0.9025 | 0 | 0 | 0 | 1      | Ref |
| KR054030 | Unassigned | Unassigned | Unassigned | 80_0   | Clustered           | 41 VC_80_0   | 41 | 0.5837 | 1          | 0.5837 | 0 | 0 | 0 | 0.9805 | Ref |
| KR054031 | Unassigned | Unassigned | Unassigned | 423_0  | Clustered           | 45 VC_423_0  | 45 | 0.9484 | 1          | 0.9484 | 0 | 0 | 0 | 1      | Ref |
| KR054032 | Unassigned | Unassigned | Unassigned | 838_0  | Clustered           | 29 VC_838_0  | 29 | 0.8611 | 1          | 0.8611 | 0 | 0 | 0 | 1      | Ref |
| KR054033 | Unassigned | Unassigned | Unassigned | 79_7   | Clustered           | 33 VC_79_7   | 33 | 0.216  | 1          | 0.216  | 0 | 0 | 0 | 0.8409 | Ref |
| KR060090 | Unassigned | Unassigned | Unassigned | 896_0  | Clustered           | 5 VC_896_0   | 5  | 0.4981 | 0.99999977 | 0.4981 | 0 | 0 | 0 | 1      | Ref |
| KR063267 | Unassigned | Unassigned | Unassigned | 875_0  | Clustered           | 10 VC_875_0  | 10 | 0.988  | 0.99948433 | 0.9875 | 0 | 0 | 0 | 1      | Ref |
| KR063268 | Unassigned | Unassigned | Unassigned | 875_0  | Clustered           | 10 VC_875_0  | 10 | 0.988  | 0.99948433 | 0.9875 | 0 | 0 | 0 | 1      | Ref |
| KR063278 | Unassigned | Unassigned | Unassigned | 866_0  | Clustered           | 4 VC_866_0   | 4  | 0.0795 | 0.99998595 | 0.0795 | 0 | 0 | 0 | 1      | Ref |
| KR063279 | Unassigned | Unassigned | Unassigned | 867_0  | Clustered           | 6 VC_867_0   | 6  | 0.3202 | 1          | 0.3202 | 0 | 0 | 0 | 1      | Ref |
| KR063280 | Unassigned | Unassigned | Unassigned | 1096_0 | Clustered           | 5 VC_1096_0  | 5  | 0.8566 | 0.99869977 | 0.8555 | 0 | 0 | 0 | 1      | Ref |
| KR063281 | Unassigned | Unassigned | Unassigned | 1098_1 | Clustered/Singleton | 1 VC_1098_1  | 1  | 0      | 1          | 0      | 0 | 0 | 0 | 1      | Ref |
| KR073660 | Unassigned | Unassigned | Unassigned | 228_0  | Clustered           | 60 VC_228_0  | 60 | 0.942  | 1          | 0.942  | 0 | 0 | 0 | 1      | Ref |
| KR073661 | Unassigned | Unassigned | Unassigned | 228_0  | Clustered           | 60 VC_228_0  | 60 | 0.942  | 1          | 0.942  | 0 | 0 | 0 | 1      | Ref |
| KR080193 | Unassigned | Unassigned | Unassigned | 220_0  | Clustered           | 4 VC_220_0   | 4  | 0.0615 | 0.99998802 | 0.0615 | 0 | 0 | 0 | 1      | Ref |
| KR080194 | Unassigned | Unassigned | Unassigned | 372_0  | Clustered           | 24 VC_372_0  | 24 | 0.5539 | 1          | 0.5539 | 0 | 0 | 0 | 1      | Ref |
| KR080195 | Unassigned | Unassigned | Unassigned | 519_0  | Clustered           | 39 VC_519_0  | 39 | 0.8156 | 1          | 0.8156 | 0 | 0 | 0 | 1      | Ref |
| KR080196 | Unassigned | Unassigned | Unassigned | 558_20 | Clustered           | 17 VC_558_20 | 17 | 0.054  | 1          | 0.054  | 0 | 0 | 0 | 0.9926 | Ref |
| KR080197 | Unassigned | Unassigned | Unassigned | 762_0  | Clustered           | 9 VC_762_0   | 9  | 0.0885 | 1          | 0.0885 | 0 | 0 | 0 | 1      | Ref |
| KR080198 | Unassigned | Unassigned | Unassigned | 762_0  | Clustered           | 9 VC_762_0   | 9  | 0.0885 | 1          | 0.0885 | 0 | 0 | 0 | 1      | Ref |
| KR080199 | Unassigned | Unassigned | Unassigned | 372_1  | Clustered           | 9 VC_372_1   | 9  | 0.194  | 1          | 0.194  | 0 | 0 | 0 | 1      | Ref |
| KR080200 | Unassigned | Unassigned | Unassigned | 372_0  | Clustered           | 24 VC_372_0  | 24 | 0.5539 | 1          | 0.5539 | 0 | 0 | 0 | 1      | Ref |
| KR080201 | Unassigned | Unassigned | Unassigned | 325_35 | Clustered           | 17 VC_325_35 | 17 | 0.0732 | 1          | 0.0732 | 0 | 0 | 0 | 0.7721 | Ref |
| KR080202 | Unassigned | Unassigned | Unassigned | 762_0  | Clustered           | 9 VC_762_0   | 9  | 0.0885 | 1          | 0.0885 | 0 | 0 | 0 | 1      | Ref |
| KR080203 | Unassigned | Unassigned | Unassigned | 509_0  | Clustered           | 37 VC_509_0  | 37 | 0.9689 | 1          | 0.9689 | 0 | 0 | 0 | 1      | Ref |
| KR080204 | Unassigned | Unassigned | Unassigned | 551_2  | Clustered           | 17 VC_551_2  | 17 | 0.0973 | 1          | 0.0973 | 0 | 0 | 0 | 0.9779 | Ref |
| KR080205 | Unassigned | Unassigned | Unassigned | 509_0  | Clustered           | 37 VC_509_0  | 37 | 0.9689 | 1          | 0.9689 | 0 | 0 | 0 | 1      | Ref |
| KR080206 | Unassigned | Unassigned | Unassigned | 237_1  | Clustered           | 13 VC_237_1  | 13 | 0.1773 | 1          | 0.1773 | 0 | 0 | 0 | 0.7308 | Ref |
| KR091952 | Unassigned | Unassigned | Unassigned | 129_0  | Clustered           | 43 VC_129_0  | 43 | 0.886  | 1          | 0.886  | 0 | 0 | 0 | 1      | Ref |
| KR093625 | Unassigned | Unassigned | Unassigned | 933_0  | Clustered           | 8 VC_933_0   | 8  | 0.3648 | 1          | 0.3648 | 0 | 0 | 0 | 1      | Ref |
| KR093626 | Unassigned | Unassigned | Unassigned | 933_0  | Clustered           | 8 VC_933_0   | 8  | 0.3648 | 1          | 0.3648 | 0 | 0 | 0 | 1      | Ref |
| KR093627 | Unassigned | Unassigned | Unassigned | 933_0  | Clustered           | 8 VC_933_0   | 8  | 0.3648 | 1          | 0.3648 | 0 | 0 | 0 | 1      | Ref |
| KR093628 | Unassigned | Unassigned | Unassigned | 933_0  | Clustered           | 8 VC_933_0   | 8  | 0.3648 | 1          | 0.3648 | 0 | 0 | 0 | 1      | Ref |
| KR093629 | Unassigned | Unassigned | Unassigned | 933_0  | Clustered           | 8 VC_933_0   | 8  | 0.3648 | 1          | 0.3648 | 0 | 0 | 0 | 1      | Ref |
| KR093630 | Unassigned | Unassigned | Unassigned | 933_0  | Clustered           | 8 VC_933_0   | 8  | 0.3648 | 1          | 0.3648 | 0 | 0 | 0 | 1      | Ref |
| KR093631 | Unassigned | Unassigned | Unassigned | 933_0  | Clustered           | 8 VC_933_0   | 8  | 0.3648 | 1          | 0.3648 | 0 | 0 | 0 | 1      | Ref |
| KR093633 | Unassigned | Unassigned | Unassigned | 933_0  | Clustered           | 8 VC_933_0   | 8  | 0.3648 | 1          | 0.3648 | 0 | 0 | 0 | 1      | Ref |
| KR093634 | Unassigned | Unassigned | Unassigned | 604_0  | Clustered           | 22 VC_604_0  | 22 | 0.7846 | 1          | 0.7846 | 0 | 0 | 0 | 1      | Ref |
| KR093635 | Unassigned | Unassigned | Unassigned | 604_0  | Clustered           | 22 VC_604_0  | 22 | 0.7846 | 1          | 0.7846 | 0 | 0 | 0 | 1      | Ref |
| KR093636 | Unassigned | Unassigned | Unassigned | 604_0  | Clustered           | 22 VC_604_0  | 22 | 0.7846 | 1          | 0.7846 | 0 | 0 | 0 | 1      | Ref |
| KR093637 | Unassigned | Unassigned | Unassigned | 604_0  | Clustered           | 22 VC_604_0  | 22 | 0.7846 | 1          | 0.7846 | 0 | 0 | 0 | 1      | Ref |
| KR093639 | Unassigned | Unassigned | Unassigned | 604_0  | Clustered           | 22 VC_604_0  | 22 | 0.7846 | 1          | 0.7846 | 0 | 0 | 0 | 1      | Ref |
| KR093640 | Unassigned | Unassigned | Unassigned | 604_0  | Clustered           | 22 VC_604_0  | 22 | 0.7846 | 1          | 0.7846 | 0 | 0 | 0 | 1      | Ref |



|          |            |            |            |         |                     |              |     |        |            |        |   |   |   |            |
|----------|------------|------------|------------|---------|---------------------|--------------|-----|--------|------------|--------|---|---|---|------------|
| KR093641 | Unassigned | Unassigned | Unassigned | 604_0   | Clustered           | 22 VC_604_0  | 22  | 0.7846 | 1          | 0.7846 | 0 | 0 | 0 | 1 Ref      |
| KR093642 | Unassigned | Unassigned | Unassigned | 604_0   | Clustered           | 22 VC_604_0  | 22  | 0.7846 | 1          | 0.7846 | 0 | 0 | 0 | 1 Ref      |
| KR093643 | Unassigned | Unassigned | Unassigned | 604_0   | Clustered           | 22 VC_604_0  | 22  | 0.7846 | 1          | 0.7846 | 0 | 0 | 0 | 1 Ref      |
| KR093644 | Unassigned | Unassigned | Unassigned | 604_0   | Clustered           | 22 VC_604_0  | 22  | 0.7846 | 1          | 0.7846 | 0 | 0 | 0 | 1 Ref      |
| KR093645 | Unassigned | Unassigned | Unassigned | 604_0   | Clustered           | 22 VC_604_0  | 22  | 0.7846 | 1          | 0.7846 | 0 | 0 | 0 | 1 Ref      |
| KR093646 | Unassigned | Unassigned | Unassigned | 604_0   | Clustered           | 22 VC_604_0  | 22  | 0.7846 | 1          | 0.7846 | 0 | 0 | 0 | 1 Ref      |
| KR093647 | Unassigned | Unassigned | Unassigned | 604_0   | Clustered           | 22 VC_604_0  | 22  | 0.7846 | 1          | 0.7846 | 0 | 0 | 0 | 1 Ref      |
| KR093648 | Unassigned | Unassigned | Unassigned | 604_0   | Clustered           | 22 VC_604_0  | 22  | 0.7846 | 1          | 0.7846 | 0 | 0 | 0 | 1 Ref      |
| KR093649 | Unassigned | Unassigned | Unassigned | 604_0   | Clustered           | 22 VC_604_0  | 22  | 0.7846 | 1          | 0.7846 | 0 | 0 | 0 | 1 Ref      |
| KR093650 | Unassigned | Unassigned | Unassigned | 604_0   | Clustered           | 22 VC_604_0  | 22  | 0.7846 | 1          | 0.7846 | 0 | 0 | 0 | 1 Ref      |
| KR093651 | Unassigned | Unassigned | Unassigned | 604_0   | Clustered           | 22 VC_604_0  | 22  | 0.7846 | 1          | 0.7846 | 0 | 0 | 0 | 1 Ref      |
| KR093652 | Unassigned | Unassigned | Unassigned | 604_0   | Clustered           | 22 VC_604_0  | 22  | 0.7846 | 1          | 0.7846 | 0 | 0 | 0 | 1 Ref      |
| KR093653 | Unassigned | Unassigned | Unassigned | 604_0   | Clustered           | 22 VC_604_0  | 22  | 0.7846 | 1          | 0.7846 | 0 | 0 | 0 | 1 Ref      |
| KR093654 | Unassigned | Unassigned | Unassigned | 604_0   | Clustered           | 22 VC_604_0  | 22  | 0.7846 | 1          | 0.7846 | 0 | 0 | 0 | 1 Ref      |
| KR093655 | Unassigned | Unassigned | Unassigned | 604_0   | Clustered           | 22 VC_604_0  | 22  | 0.7846 | 1          | 0.7846 | 0 | 0 | 0 | 1 Ref      |
| KR093656 | Unassigned | Unassigned | Unassigned | 604_0   | Clustered           | 22 VC_604_0  | 22  | 0.7846 | 1          | 0.7846 | 0 | 0 | 0 | 1 Ref      |
| KR131750 | Unassigned | Unassigned | Unassigned | 695_0   | Clustered           | 48 VC_695_0  | 48  | 0.8162 | 1          | 0.8162 | 0 | 0 | 0 | 1 Ref      |
| KR136259 | Unassigned | Unassigned | Unassigned | 1101_0  | Clustered           | 2 VC_1101_0  | 2   | 0.9786 | 0.72985431 | 0.7143 | 0 | 0 | 0 | 1 Ref      |
| KR136260 | Unassigned | Unassigned | Unassigned | 1101_0  | Clustered           | 2 VC_1101_0  | 2   | 0.9786 | 0.72985431 | 0.7143 | 0 | 0 | 0 | 1 Ref      |
| KR149290 | Unassigned | Unassigned | Unassigned | 699_0   | Clustered           | 71 VC_699_0  | 71  | 0.9352 | 1          | 0.9352 | 0 | 0 | 0 | 1 Ref      |
| KR149291 | Unassigned | Unassigned | Unassigned | 823_0   | Clustered           | 124 VC_823_0 | 124 | 0.9492 | 1          | 0.9492 | 0 | 0 | 0 | 1 Ref      |
| KR153145 | Unassigned | Unassigned | Unassigned | 463_0   | Clustered           | 4 VC_463_0   | 4   | 0.7906 | 0.99997156 | 0.7906 | 0 | 0 | 0 | 1 Ref      |
| KR233164 | Unassigned | Unassigned | Unassigned | 190_27  | Clustered/Singleton | 1 VC_190_27  | 1   | 0      | 1          | 0      | 0 | 0 | 0 | 1 Ref      |
| KR233165 | Unassigned | Unassigned | Unassigned | 283_163 | Clustered           | 2 VC_283_163 | 2   | 0.0029 | 0.93420746 | 0.0027 | 0 | 0 | 0 | 1 Ref      |
| KR262148 | Unassigned | Unassigned | Unassigned | 938_0   | Clustered           | 99 VC_938_0  | 99  | 0.9119 | 1          | 0.9119 | 0 | 0 | 0 | 0.9928 Ref |
| KR269718 | Unassigned | Unassigned | Unassigned | 283_81  | Clustered/Singleton | 1 VC_283_81  | 1   | 0      | 1          | 0      | 0 | 0 | 0 | 1 Ref      |
| KR269719 | Unassigned | Unassigned | Unassigned | 937_0   | Clustered           | 40 VC_937_0  | 40  | 0.6809 | 1          | 0.6809 | 0 | 0 | 0 | 0.9359 Ref |
| KR269720 | Unassigned | Unassigned | Unassigned | 491_0   | Clustered           | 36 VC_491_0  | 36  | 0.5336 | 1          | 0.5336 | 0 | 0 | 0 | 0.9714 Ref |
| KR270151 | Unassigned | Unassigned | Unassigned | 637_0   | Clustered           | 115 VC_637_0 | 115 | 0.731  | 1          | 0.731  | 0 | 0 | 0 | 0.8764 Ref |
| KR296686 | Unassigned | Unassigned | Unassigned | 28_1    | Clustered           | 53 VC_28_1   | 53  | 0.7164 | 1          | 0.7164 | 0 | 0 | 0 | 0.9325 Ref |
| KR296687 | Unassigned | Unassigned | Unassigned | 28_1    | Clustered           | 53 VC_28_1   | 53  | 0.7164 | 1          | 0.7164 | 0 | 0 | 0 | 0.9325 Ref |
| KR296688 | Unassigned | Unassigned | Unassigned | 28_1    | Clustered           | 53 VC_28_1   | 53  | 0.7164 | 1          | 0.7164 | 0 | 0 | 0 | 0.9325 Ref |
| KR296689 | Unassigned | Unassigned | Unassigned | 592_0   | Clustered           | 50 VC_592_0  | 50  | 0.7314 | 1          | 0.7314 | 0 | 0 | 0 | 1 Ref      |
| KR296691 | Unassigned | Unassigned | Unassigned | 592_0   | Clustered           | 50 VC_592_0  | 50  | 0.7314 | 1          | 0.7314 | 0 | 0 | 0 | 1 Ref      |
| KR296692 | Unassigned | Unassigned | Unassigned | 133_18  | Clustered/Singleton | 1 VC_133_18  | 1   | 0      | 1          | 0      | 0 | 0 | 0 | 1 Ref      |
| KR337643 | Unassigned | Unassigned | Unassigned | 765_0   | Clustered           | 132 VC_765_0 | 132 | 1      | 1          | 1      | 0 | 0 | 0 | 1 Ref      |
| KR337644 | Unassigned | Unassigned | Unassigned | 765_0   | Clustered           | 132 VC_765_0 | 132 | 1      | 1          | 1      | 0 | 0 | 0 | 1 Ref      |
| KR337645 | Unassigned | Unassigned | Unassigned | 765_0   | Clustered           | 132 VC_765_0 | 132 | 1      | 1          | 1      | 0 | 0 | 0 | 1 Ref      |
| KR337646 | Unassigned | Unassigned | Unassigned | 765_0   | Clustered           | 132 VC_765_0 | 132 | 1      | 1          | 1      | 0 | 0 | 0 | 1 Ref      |
| KR337647 | Unassigned | Unassigned | Unassigned | 765_0   | Clustered           | 132 VC_765_0 | 132 | 1      | 1          | 1      | 0 | 0 | 0 | 1 Ref      |
| KR337648 | Unassigned | Unassigned | Unassigned | 765_0   | Clustered           | 132 VC_765_0 | 132 | 1      | 1          | 1      | 0 | 0 | 0 | 1 Ref      |
| KR337649 | Unassigned | Unassigned | Unassigned | 765_0   | Clustered           | 132 VC_765_0 | 132 | 1      | 1          | 1      | 0 | 0 | 0 | 1 Ref      |
| KR337650 | Unassigned | Unassigned | Unassigned | 765_0   | Clustered           | 132 VC_765_0 | 132 | 1      | 1          | 1      | 0 | 0 | 0 | 1 Ref      |
| KR337651 | Unassigned | Unassigned | Unassigned | 765_0   | Clustered           | 132 VC_765_0 | 132 | 1      | 1          | 1      | 0 | 0 | 0 | 1 Ref      |
| KR337652 | Unassigned | Unassigned | Unassigned | 765_0   | Clustered           | 132 VC_765_0 | 132 | 1      | 1          | 1      | 0 | 0 | 0 | 1 Ref      |
| KR337653 | Unassigned | Unassigned | Unassigned | 765_0   | Clustered           | 132 VC_765_0 | 132 | 1      | 1          | 1      | 0 | 0 | 0 | 1 Ref      |
| KR337654 | Unassigned | Unassigned | Unassigned | 765_0   | Clustered           | 132 VC_765_0 | 132 | 1      | 1          | 1      | 0 | 0 | 0 | 1 Ref      |
| KR347352 | Unassigned | Unassigned | Unassigned | 765_0   | Clustered           | 132 VC_765_0 | 132 | 1      | 1          | 1      | 0 | 0 | 0 | 1 Ref      |
| KR347353 | Unassigned | Unassigned | Unassigned | 765_0   | Clustered           | 132 VC_765_0 | 132 | 1      | 1          | 1      | 0 | 0 | 0 | 1 Ref      |
| KR347354 | Unassigned | Unassigned | Unassigned | 765_0   | Clustered           | 132 VC_765_0 | 132 | 1      | 1          | 1      | 0 | 0 | 0 | 1 Ref      |
| KR347355 | Unassigned | Unassigned | Unassigned | 765_0   | Clustered           | 132 VC_765_0 | 132 | 1      | 1          | 1      | 0 | 0 | 0 | 1 Ref      |
| KR422352 | Unassigned | Unassigned | Unassigned | 286_1   | Clustered           | 21 VC_286_1  | 21  | 0.1696 | 1          | 0.1696 | 0 | 0 | 0 | 0.9048 Ref |
| KR422353 | Unassigned | Unassigned | Unassigned | 190_10  | Clustered/Singleton | 1 VC_190_10  | 1   | 0      | 1          | 0      | 0 | 0 | 0 | 1 Ref      |
| KR534323 | Unassigned | Unassigned | Unassigned | 496_2   | Clustered/Singleton | 1 VC_496_2   | 1   | 0      | 1          | 0      | 0 | 0 | 0 | 1 Ref      |
| KR537871 | Unassigned | Unassigned | Unassigned | 749_0   | Clustered           | 40 VC_749_0  | 40  | 0.7517 | 1          | 0.7517 | 0 | 0 | 0 | 1 Ref      |
| KR537872 | Unassigned | Unassigned | Unassigned | 749_0   | Clustered           | 40 VC_749_0  | 40  | 0.7517 | 1          | 0.7517 | 0 | 0 | 0 | 1 Ref      |
| KR560069 | Unassigned | Unassigned | Unassigned | 506_0   | Clustered           | 8 VC_506_0   | 8   | 0.7376 | 1          | 0.7376 | 0 | 0 | 0 | 1 Ref      |
| KR604693 | Unassigned | Unassigned | Unassigned | 984_0   | Clustered           | 38 VC_984_0  | 38  | 0.9758 | 1          | 0.9758 | 0 | 0 | 0 | 1 Ref      |
| KR698074 | Unassigned | Unassigned | Unassigned | 772_8   | Clustered           | 2 VC_772_8   | 2   | 0.006  | 0.58293682 | 0.0035 | 0 | 0 | 0 | 1 Ref      |
| KR704913 | Unassigned | Unassigned | Unassigned | 1103_0  | Clustered           | 2 VC_1103_0  | 2   | 1      | 1          | 1      | 0 | 0 | 0 | 1 Ref      |
| KR704915 | Unassigned | Unassigned | Unassigned | 1103_0  | Clustered           | 2 VC_1103_0  | 2   | 1      | 1          | 1      | 0 | 0 | 0 | 1 Ref      |
| KR709302 | Unassigned | Unassigned | Unassigned | 12_2    | Clustered           | 19 VC_12_2   | 19  | 0.2018 | 1          | 0.2018 | 0 | 0 | 0 | 1 Ref      |
| KR709303 | Unassigned | Unassigned | Unassigned | 12_2    | Clustered           | 19 VC_12_2   | 19  | 0.2018 | 1          | 0.2018 | 0 | 0 | 0 | 1 Ref      |
| KR781349 | Unassigned | Unassigned | Unassigned | 371_21  | Clustered           | 2 VC_371_21  | 2   | 0.0033 | 0.95770737 | 0.0032 | 0 | 0 | 0 | 1 Ref      |
| KR781488 | Unassigned | Unassigned | Unassigned | 42_0    | Clustered           | 49 VC_42_0   | 49  | 0.4517 | 1          | 0.4517 | 0 | 0 | 0 | 0.8597 Ref |
| KR816341 | Unassigned | Unassigned | Unassigned | 1109_0  | Clustered           | 2 VC_1109_0  | 2   | 0.6449 | 0.85557782 | 0.5517 | 0 | 0 | 0 | 1 Ref      |
| KR816508 | Unassigned | Unassigned | Unassigned | 371_18  | Clustered           | 10 VC_371_18 | 10  | 0.0302 | 1          | 0.0302 | 0 | 0 | 0 | 0.8 Ref    |
| KR824843 | Unassigned | Unassigned | Unassigned | 520_2   | Clustered/Singleton | 1 VC_520_2   | 1   | 0      | 1          | 0      | 0 | 0 | 0 | 1 Ref      |
| KR869157 | Unassigned | Unassigned | Unassigned | 79_0    | Clustered           | 64 VC_79_0   | 64  | 0.4185 | 1          | 0.4185 | 0 | 0 | 0 | 0.7649 Ref |
| KR869820 | Unassigned | Unassigned | Unassigned | 669_1   | Clustered           | 10 VC_669_1  | 10  | 0.1268 | 1          | 0.1268 | 0 | 0 | 0 | 0.9778 Ref |
| KR902361 | Unassigned | Unassigned | Unassigned | 149_8   | Clustered           | 66 VC_149_8  | 66  | 0.4565 | 1          | 0.4565 | 0 | 0 | 0 | 0.8182 Ref |
| KR902978 | Unassigned | Unassigned | Unassigned | 765_0   | Clustered           | 132 VC_765_0 | 132 | 1      | 1          | 1      | 0 | 0 | 0 | 1 Ref      |
| KR902979 | Unassigned | Unassigned | Unassigned | 765_0   | Clustered           | 132 VC_765_0 | 132 | 1      | 1          | 1      | 0 | 0 | 0 | 1 Ref      |
| KR902980 | Unassigned | Unassigned | Unassigned | 765_0   | Clustered           | 132 VC_765_0 | 132 | 1      | 1          | 1      | 0 | 0 | 0 | 1 Ref      |
| KR902981 | Unassigned | Unassigned | Unassigned | 765_0   | Clustered           | 132 VC_765_0 | 132 | 1      | 1          | 1      | 0 | 0 | 0 | 1 Ref      |
| KR902982 | Unassigned | Unassigned | Unassigned | 765_0   | Clustered           | 132 VC_765_0 | 132 | 1      | 1          | 1      | 0 | 0 | 0 | 1 Ref      |
| KR902983 | Unassigned | Unassigned | Unassigned | 765_0   | Clustered           | 132 VC_765_0 | 132 | 1      | 1          | 1      | 0 | 0 | 0 | 1 Ref      |
| KR902984 | Unassigned | Unassigned | Unassigned | 765_0   | Clustered           | 132 VC_765_0 | 132 | 1      | 1          | 1      | 0 | 0 | 0 | 1 Ref      |
| KR902985 | Unassigned | Unassigned | Unassigned | 765_0   | Clustered           | 132 VC_765_0 | 132 | 1      | 1          | 1      | 0 | 0 | 0 | 1 Ref      |
| KR902986 | Unassigned | Unassigned | Unassigned | 765_0   | Clustered           | 132 VC_765_0 | 132 | 1      | 1          | 1      | 0 | 0 | 0 | 1 Ref      |
| KR902987 | Unassigned | Unassigned | Unassigned | 765_0   | Clustered           | 132 VC_765_0 | 132 | 1      | 1          | 1      | 0 | 0 | 0 | 1 Ref      |



|          |            |            |            |        |                     |               |     |        |            |        |   |   |   |            |
|----------|------------|------------|------------|--------|---------------------|---------------|-----|--------|------------|--------|---|---|---|------------|
| KR905068 | Unassigned | Unassigned | Unassigned | 377_0  | Clustered           | 3 VC_377_0    | 3   | 0.3906 | 0.99785056 | 0.3898 | 0 | 0 | 0 | 1 Ref      |
| KR908644 | Unassigned | Unassigned | Unassigned | 149_8  | Clustered           | 66 VC_149_8   | 66  | 0.4565 | 1          | 0.4565 | 0 | 0 | 0 | 0.8182 Ref |
| KR935213 | Unassigned | Unassigned | Unassigned | 749_0  | Clustered           | 40 VC_749_0   | 40  | 0.7517 | 1          | 0.7517 | 0 | 0 | 0 | 1 Ref      |
| KR935214 | Unassigned | Unassigned | Unassigned | 520_73 | Clustered           | 2 VC_520_73   | 2   | 0.0107 | 0.95762743 | 0.0103 | 0 | 0 | 0 | 1 Ref      |
| KR935215 | Unassigned | Unassigned | Unassigned | 749_0  | Clustered           | 40 VC_749_0   | 40  | 0.7517 | 1          | 0.7517 | 0 | 0 | 0 | 1 Ref      |
| KR935216 | Unassigned | Unassigned | Unassigned | 874_0  | Clustered           | 3 VC_874_0    | 3   | 0.6293 | 0.99812483 | 0.6281 | 0 | 0 | 0 | 1 Ref      |
| KR935217 | Unassigned | Unassigned | Unassigned | 874_0  | Clustered           | 3 VC_874_0    | 3   | 0.6293 | 0.99812483 | 0.6281 | 0 | 0 | 0 | 1 Ref      |
| KR997929 | Unassigned | Unassigned | Unassigned | 325_7  | Clustered           | 3 VC_325_7    | 3   | 0.0085 | 0.99739782 | 0.0085 | 0 | 0 | 0 | 0.6667 Ref |
| KR997930 | Unassigned | Unassigned | Unassigned | 520_35 | Clustered           | 3 VC_520_35   | 3   | 0.0251 | 0.99859857 | 0.0251 | 0 | 0 | 0 | 1 Ref      |
| KR997931 | Unassigned | Unassigned | Unassigned | 520_35 | Clustered           | 3 VC_520_35   | 3   | 0.0251 | 0.99859857 | 0.0251 | 0 | 0 | 0 | 1 Ref      |
| KR997932 | Unassigned | Unassigned | Unassigned | 508_0  | Clustered           | 32 VC_508_0   | 32  | 0.906  | 1          | 0.906  | 0 | 0 | 0 | 1 Ref      |
| KR997933 | Unassigned | Unassigned | Unassigned | 569_0  | Clustered           | 3 VC_569_0    | 3   | 0.2094 | 0.99849867 | 0.2091 | 0 | 0 | 0 | 1 Ref      |
| KR997934 | Unassigned | Unassigned | Unassigned | 325_7  | Clustered           | 3 VC_325_7    | 3   | 0.0085 | 0.99739782 | 0.0085 | 0 | 0 | 0 | 0.6667 Ref |
| KR997967 | Unassigned | Unassigned | Unassigned | 371_1  | Clustered           | 11 VC_371_1   | 11  | 0.0379 | 1          | 0.0379 | 0 | 0 | 0 | 0.8545 Ref |
| KR997968 | Unassigned | Unassigned | Unassigned | 520_35 | Clustered           | 3 VC_520_35   | 3   | 0.0251 | 0.99859857 | 0.0251 | 0 | 0 | 0 | 1 Ref      |
| KT001911 | Unassigned | Unassigned | Unassigned | 1032_0 | Clustered           | 7 VC_1032_0   | 7   | 0.9887 | 0.99999504 | 0.9887 | 0 | 0 | 0 | 1 Ref      |
| KT001912 | Unassigned | Unassigned | Unassigned | 102_0  | Clustered           | 2 VC_102_0    | 2   | 0.114  | 0.94637553 | 0.1079 | 0 | 0 | 0 | 1 Ref      |
| KT001913 | Unassigned | Unassigned | Unassigned | 170_0  | Clustered/Singleton | 1 VC_170_0    | 1   | 0      | 1          | 0      | 0 | 0 | 0 | 1 Ref      |
| KT001914 | Unassigned | Unassigned | Unassigned | 1090_0 | Clustered           | 4 VC_1090_0   | 4   | 1      | 1          | 1      | 0 | 0 | 0 | 1 Ref      |
| KT001916 | Unassigned | Unassigned | Unassigned | 330_0  | Clustered           | 27 VC_330_0   | 27  | 0.5088 | 1          | 0.5088 | 0 | 0 | 0 | 0.8661 Ref |
| KT001917 | Unassigned | Unassigned | Unassigned | 772_19 | Clustered           | 16 VC_772_19  | 16  | 0.0975 | 0.9970466  | 0.0972 | 0 | 0 | 0 | 0.8083 Ref |
| KT001918 | Unassigned | Unassigned | Unassigned | 668_0  | Clustered           | 25 VC_668_0   | 25  | 0.5539 | 1          | 0.5539 | 0 | 0 | 0 | 0.96 Ref   |
| KT001919 | Unassigned | Unassigned | Unassigned | 668_0  | Clustered           | 25 VC_668_0   | 25  | 0.5539 | 1          | 0.5539 | 0 | 0 | 0 | 0.96 Ref   |
| KT001920 | Unassigned | Unassigned | Unassigned | 938_0  | Clustered           | 99 VC_938_0   | 99  | 0.9119 | 1          | 0.9119 | 0 | 0 | 0 | 0.9928 Ref |
| KT004677 | Unassigned | Unassigned | Unassigned | 940_0  | Clustered           | 34 VC_940_0   | 34  | 0.7959 | 1          | 0.7959 | 0 | 0 | 0 | 1 Ref      |
| KT008108 | Unassigned | Unassigned | Unassigned | 385_0  | Clustered           | 51 VC_385_0   | 51  | 0.8754 | 1          | 0.8754 | 0 | 0 | 0 | 1 Ref      |
| KT020852 | Unassigned | Unassigned | Unassigned | 551_7  | Clustered           | 28 VC_551_7   | 28  | 0.1661 | 1          | 0.1661 | 0 | 0 | 0 | 0.8519 Ref |
| KT070866 | Unassigned | Unassigned | Unassigned | 1006_0 | Clustered           | 8 VC_1006_0   | 8   | 0.7407 | 1          | 0.7407 | 0 | 0 | 0 | 1 Ref      |
| KT070867 | Unassigned | Unassigned | Unassigned | 475_6  | Clustered/Singleton | 1 VC_475_6    | 1   | 0      | 1          | 0      | 0 | 0 | 0 | 1 Ref      |
| KT124227 | Unassigned | Unassigned | Unassigned | 982_0  | Clustered           | 62 VC_982_0   | 62  | 0.8646 | 1          | 0.8646 | 0 | 0 | 0 | 0.743 Ref  |
| KT124228 | Unassigned | Unassigned | Unassigned | 982_0  | Clustered           | 62 VC_982_0   | 62  | 0.8646 | 1          | 0.8646 | 0 | 0 | 0 | 0.743 Ref  |
| KT124229 | Unassigned | Unassigned | Unassigned | 982_0  | Clustered           | 62 VC_982_0   | 62  | 0.8646 | 1          | 0.8646 | 0 | 0 | 0 | 0.743 Ref  |
| KT151955 | Unassigned | Unassigned | Unassigned | 720_0  | Clustered           | 2 VC_720_0    | 2   | 0.5579 | 0.89435023 | 0.4989 | 0 | 0 | 0 | 1 Ref      |
| KT151956 | Unassigned | Unassigned | Unassigned | 141_0  | Clustered           | 6 VC_141_0    | 6   | 0.5999 | 1          | 0.5999 | 0 | 0 | 0 | 1 Ref      |
| KT151957 | Unassigned | Unassigned | Unassigned | 720_0  | Clustered           | 2 VC_720_0    | 2   | 0.5579 | 0.89435023 | 0.4989 | 0 | 0 | 0 | 1 Ref      |
| KT151958 | Unassigned | Unassigned | Unassigned | 141_0  | Clustered           | 6 VC_141_0    | 6   | 0.5999 | 1          | 0.5999 | 0 | 0 | 0 | 1 Ref      |
| KT151959 | Unassigned | Unassigned | Unassigned | 211_2  | Clustered/Singleton | 1 VC_211_2    | 1   | 0      | 1          | 0      | 0 | 0 | 0 | 1 Ref      |
| KT152029 | Unassigned | Unassigned | Unassigned | 982_0  | Clustered           | 62 VC_982_0   | 62  | 0.8646 | 1          | 0.8646 | 0 | 0 | 0 | 0.743 Ref  |
| KT160311 | Unassigned | Unassigned | Unassigned | 499_0  | Clustered           | 24 VC_499_0   | 24  | 0.8569 | 1          | 0.8569 | 0 | 0 | 0 | 0.9529 Ref |
| KT176190 | Unassigned | Unassigned | Unassigned | 290_5  | Clustered           | 14 VC_290_5   | 14  | 0.1422 | 1          | 0.1422 | 0 | 0 | 0 | 0.9231 Ref |
| KT184308 | Unassigned | Unassigned | Unassigned | 283_66 | Clustered/Singleton | 1 VC_283_66   | 1   | 0      | 1          | 0      | 0 | 0 | 0 | 1 Ref      |
| KT184309 | Unassigned | Unassigned | Unassigned | 286_17 | Clustered           | 8 VC_286_17   | 8   | 0.0535 | 0.99997829 | 0.0535 | 0 | 0 | 0 | 0.6071 Ref |
| KT184310 | Unassigned | Unassigned | Unassigned | 286_17 | Clustered           | 8 VC_286_17   | 8   | 0.0535 | 0.99997829 | 0.0535 | 0 | 0 | 0 | 0.6071 Ref |
| KT184311 | Unassigned | Unassigned | Unassigned | 283_57 | Clustered/Singleton | 1 VC_283_57   | 1   | 0      | 1          | 0      | 0 | 0 | 0 | 1 Ref      |
| KT184312 | Unassigned | Unassigned | Unassigned | 283_63 | Clustered/Singleton | 1 VC_283_63   | 1   | 0      | 1          | 0      | 0 | 0 | 0 | 1 Ref      |
| KT184313 | Unassigned | Unassigned | Unassigned | 329_7  | Clustered           | 18 VC_329_7   | 18  | 0.0938 | 1          | 0.0938 | 0 | 0 | 0 | 0.7778 Ref |
| KT184314 | Unassigned | Unassigned | Unassigned | 329_7  | Clustered           | 18 VC_329_7   | 18  | 0.0938 | 1          | 0.0938 | 0 | 0 | 0 | 0.7778 Ref |
| KT184315 | Unassigned | Unassigned | Unassigned | 329_7  | Clustered           | 18 VC_329_7   | 18  | 0.0938 | 1          | 0.0938 | 0 | 0 | 0 | 0.7778 Ref |
| KT184316 | Unassigned | Unassigned | Unassigned | 329_7  | Clustered           | 18 VC_329_7   | 18  | 0.0938 | 1          | 0.0938 | 0 | 0 | 0 | 0.7778 Ref |
| KT184390 | Unassigned | Unassigned | Unassigned | 982_0  | Clustered           | 62 VC_982_0   | 62  | 0.8646 | 1          | 0.8646 | 0 | 0 | 0 | 0.743 Ref  |
| KT184391 | Unassigned | Unassigned | Unassigned | 982_0  | Clustered           | 62 VC_982_0   | 62  | 0.8646 | 1          | 0.8646 | 0 | 0 | 0 | 0.743 Ref  |
| KT184661 | Unassigned | Unassigned | Unassigned | 878_0  | Clustered           | 32 VC_878_0   | 32  | 0.9965 | 1          | 0.9965 | 0 | 0 | 0 | 1 Ref      |
| KT186228 | Unassigned | Unassigned | Unassigned | 982_0  | Clustered           | 62 VC_982_0   | 62  | 0.8646 | 1          | 0.8646 | 0 | 0 | 0 | 0.743 Ref  |
| KT186229 | Unassigned | Unassigned | Unassigned | 982_0  | Clustered           | 62 VC_982_0   | 62  | 0.8646 | 1          | 0.8646 | 0 | 0 | 0 | 0.743 Ref  |
| KT186243 | Unassigned | Unassigned | Unassigned | 8_0    | Clustered           | 58 VC_8_0     | 58  | 0.8306 | 1          | 0.8306 | 0 | 0 | 0 | 0.9946 Ref |
| KT187252 | Unassigned | Unassigned | Unassigned | 187_1  | Clustered           | 7 VC_187_1    | 7   | 0.1423 | 1          | 0.1423 | 0 | 0 | 0 | 1 Ref      |
| KT207918 | Unassigned | Unassigned | Unassigned | 884_0  | Clustered           | 28 VC_884_0   | 28  | 0.6211 | 1          | 0.6211 | 0 | 0 | 0 | 0.9841 Ref |
| KT221034 | Unassigned | Unassigned | Unassigned | 587_0  | Clustered           | 2 VC_587_0    | 2   | 0.3252 | 0.91192888 | 0.2965 | 0 | 0 | 0 | 1 Ref      |
| KT222940 | Unassigned | Unassigned | Unassigned | 810_0  | Clustered           | 18 VC_810_0   | 18  | 0.9121 | 1          | 0.9121 | 0 | 0 | 0 | 1 Ref      |
| KT222941 | Unassigned | Unassigned | Unassigned | 551_2  | Clustered           | 17 VC_551_2   | 17  | 0.0973 | 1          | 0.0973 | 0 | 0 | 0 | 0.9779 Ref |
| KT222942 | Unassigned | Unassigned | Unassigned | 551_2  | Clustered           | 17 VC_551_2   | 17  | 0.0973 | 1          | 0.0973 | 0 | 0 | 0 | 0.9779 Ref |
| KT224359 | Unassigned | Unassigned | Unassigned | 187_1  | Clustered           | 7 VC_187_1    | 7   | 0.1423 | 1          | 0.1423 | 0 | 0 | 0 | 1 Ref      |
| KT232076 | Unassigned | Unassigned | Unassigned | 43_0   | Clustered           | 38 VC_43_0    | 38  | 0.5885 | 1          | 0.5885 | 0 | 0 | 0 | 0.9659 Ref |
| KT239446 | Unassigned | Unassigned | Unassigned | 491_0  | Clustered           | 36 VC_491_0   | 36  | 0.5336 | 1          | 0.5336 | 0 | 0 | 0 | 0.9714 Ref |
| KT240186 | Unassigned | Unassigned | Unassigned | 984_0  | Clustered           | 38 VC_984_0   | 38  | 0.9758 | 1          | 0.9758 | 0 | 0 | 0 | 1 Ref      |
| KT246485 | Unassigned | Unassigned | Unassigned | 810_0  | Clustered           | 18 VC_810_0   | 18  | 0.9121 | 1          | 0.9121 | 0 | 0 | 0 | 1 Ref      |
| KT246486 | Unassigned | Unassigned | Unassigned | 940_0  | Clustered           | 34 VC_940_0   | 34  | 0.7959 | 1          | 0.7959 | 0 | 0 | 0 | 1 Ref      |
| KT253150 | Unassigned | Unassigned | Unassigned | 874_0  | Clustered           | 3 VC_874_0    | 3   | 0.6293 | 0.99812483 | 0.6281 | 0 | 0 | 0 | 1 Ref      |
| KT254130 | Unassigned | Unassigned | Unassigned | 80_0   | Clustered           | 41 VC_80_0    | 41  | 0.5837 | 1          | 0.5837 | 0 | 0 | 0 | 0.9805 Ref |
| KT254131 | Unassigned | Unassigned | Unassigned | 80_0   | Clustered           | 41 VC_80_0    | 41  | 0.5837 | 1          | 0.5837 | 0 | 0 | 0 | 0.9805 Ref |
| KT254132 | Unassigned | Unassigned | Unassigned | 80_0   | Clustered           | 41 VC_80_0    | 41  | 0.5837 | 1          | 0.5837 | 0 | 0 | 0 | 0.9805 Ref |
| KT254133 | Unassigned | Unassigned | Unassigned | 80_0   | Clustered           | 41 VC_80_0    | 41  | 0.5837 | 1          | 0.5837 | 0 | 0 | 0 | 0.9805 Ref |
| KT259047 | Unassigned | Unassigned | Unassigned | 325_23 | Clustered           | 17 VC_325_23  | 17  | 0.0716 | 1          | 0.0716 | 0 | 0 | 0 | 0.6397 Ref |
| KT264749 | Unassigned | Unassigned | Unassigned | 1104_0 | Clustered           | 154 VC_1104_0 | 154 | 0.8484 | 1          | 0.8484 | 0 | 0 | 0 | 1 Ref      |
| KT264750 | Unassigned | Unassigned | Unassigned | 1104_0 | Clustered           | 154 VC_1104_0 | 154 | 0.8484 | 1          | 0.8484 | 0 | 0 | 0 | 1 Ref      |
| KT264751 | Unassigned | Unassigned | Unassigned | 1104_0 | Clustered           | 154 VC_1104_0 | 154 | 0.8484 | 1          | 0.8484 | 0 | 0 | 0 | 1 Ref      |
| KT264752 | Unassigned | Unassigned | Unassigned | 1104_0 | Clustered           | 154 VC_1104_0 | 154 | 0.8484 | 1          | 0.8484 | 0 | 0 | 0 | 1 Ref      |
| KT264753 | Unassigned | Unassigned | Unassigned | 1104_0 | Clustered           | 154 VC_1104_0 | 154 | 0.8484 | 1          | 0.8484 | 0 | 0 | 0 | 1 Ref      |
| KT264754 | Unassigned | Unassigned | Unassigned | 1104_0 | Clustered           | 154 VC_1104_0 | 154 | 0.8484 | 1          | 0.8484 | 0 | 0 | 0 | 1 Ref      |
| KT264755 | Unassigned | Unassigned | Unassigned | 1104_0 | Clustered           | 154 VC_1104_0 | 154 | 0.8484 | 1          | 0.8484 | 0 | 0 | 0 | 1 Ref      |
| KT264756 | Unassigned | Unassigned | Unassigned | 1104_0 | Clustered           | 154 VC_1104_0 | 154 | 0.8484 | 1          | 0.8484 | 0 | 0 | 0 | 1 Ref      |



|          |            |            |            |        |                     |               |     |        |            |        |   |   |   |           |
|----------|------------|------------|------------|--------|---------------------|---------------|-----|--------|------------|--------|---|---|---|-----------|
| KT264757 | Unassigned | Unassigned | Unassigned | 1104_0 | Clustered           | 154 VC_1104_0 | 154 | 0.8484 | 1          | 0.8484 | 0 | 0 | 0 | 1 Ref     |
| KT264758 | Unassigned | Unassigned | Unassigned | 1104_0 | Clustered           | 154 VC_1104_0 | 154 | 0.8484 | 1          | 0.8484 | 0 | 0 | 0 | 1 Ref     |
| KT264759 | Unassigned | Unassigned | Unassigned | 1104_0 | Clustered           | 154 VC_1104_0 | 154 | 0.8484 | 1          | 0.8484 | 0 | 0 | 0 | 1 Ref     |
| KT264760 | Unassigned | Unassigned | Unassigned | 1104_0 | Clustered           | 154 VC_1104_0 | 154 | 0.8484 | 1          | 0.8484 | 0 | 0 | 0 | 1 Ref     |
| KT264761 | Unassigned | Unassigned | Unassigned | 1104_0 | Clustered           | 154 VC_1104_0 | 154 | 0.8484 | 1          | 0.8484 | 0 | 0 | 0 | 1 Ref     |
| KT264762 | Unassigned | Unassigned | Unassigned | 1104_0 | Clustered           | 154 VC_1104_0 | 154 | 0.8484 | 1          | 0.8484 | 0 | 0 | 0 | 1 Ref     |
| KT264763 | Unassigned | Unassigned | Unassigned | 1104_0 | Clustered           | 154 VC_1104_0 | 154 | 0.8484 | 1          | 0.8484 | 0 | 0 | 0 | 1 Ref     |
| KT264764 | Unassigned | Unassigned | Unassigned | 1104_0 | Clustered           | 154 VC_1104_0 | 154 | 0.8484 | 1          | 0.8484 | 0 | 0 | 0 | 1 Ref     |
| KT264765 | Unassigned | Unassigned | Unassigned | 1104_0 | Clustered           | 154 VC_1104_0 | 154 | 0.8484 | 1          | 0.8484 | 0 | 0 | 0 | 1 Ref     |
| KT264766 | Unassigned | Unassigned | Unassigned | 1104_0 | Clustered           | 154 VC_1104_0 | 154 | 0.8484 | 1          | 0.8484 | 0 | 0 | 0 | 1 Ref     |
| KT264767 | Unassigned | Unassigned | Unassigned | 1104_0 | Clustered           | 154 VC_1104_0 | 154 | 0.8484 | 1          | 0.8484 | 0 | 0 | 0 | 1 Ref     |
| KT264768 | Unassigned | Unassigned | Unassigned | 1104_0 | Clustered           | 154 VC_1104_0 | 154 | 0.8484 | 1          | 0.8484 | 0 | 0 | 0 | 1 Ref     |
| KT264769 | Unassigned | Unassigned | Unassigned | 1104_0 | Clustered           | 154 VC_1104_0 | 154 | 0.8484 | 1          | 0.8484 | 0 | 0 | 0 | 1 Ref     |
| KT264775 | Unassigned | Unassigned | Unassigned | 1108_0 | Clustered           | 4 VC_1108_0   | 4   | 0.0485 | 0.99999021 | 0.0485 | 0 | 0 | 0 | 1 Ref     |
| KT264776 | Unassigned | Unassigned | Unassigned | 1116_0 | Clustered           | 14 VC_1116_0  | 14  | 0.7927 | 1          | 0.7927 | 0 | 0 | 0 | 1 Ref     |
| KT264779 | Unassigned | Unassigned | Unassigned | 1104_0 | Clustered           | 154 VC_1104_0 | 154 | 0.8484 | 1          | 0.8484 | 0 | 0 | 0 | 1 Ref     |
| KT264781 | Unassigned | Unassigned | Unassigned | 1117_0 | Clustered           | 5 VC_1117_0   | 5   | 0.4688 | 0.99999974 | 0.4688 | 0 | 0 | 0 | 1 Ref     |
| KT264782 | Unassigned | Unassigned | Unassigned | 1119_0 | Clustered           | 20 VC_1119_0  | 20  | 0.6751 | 0.99997892 | 0.6751 | 0 | 0 | 0 | 1 Ref     |
| KT264783 | Unassigned | Unassigned | Unassigned | 1119_0 | Clustered           | 20 VC_1119_0  | 20  | 0.6751 | 0.99997892 | 0.6751 | 0 | 0 | 0 | 1 Ref     |
| KT264784 | Unassigned | Unassigned | Unassigned | 1123_0 | Clustered           | 2 VC_1123_0   | 2   | 0.3187 | 0.93270267 | 0.2972 | 0 | 0 | 0 | 1 Ref     |
| KT264785 | Unassigned | Unassigned | Unassigned | 1122_0 | Clustered           | 10 VC_1122_0  | 10  | 0.9643 | 0.99999697 | 0.9643 | 0 | 0 | 0 | 1 Ref     |
| KT264788 | Unassigned | Unassigned | Unassigned | 1126_0 | Clustered           | 8 VC_1126_0   | 8   | 0.2864 | 1          | 0.2864 | 0 | 0 | 0 | 1 Ref     |
| KT264789 | Unassigned | Unassigned | Unassigned | 1126_0 | Clustered           | 8 VC_1126_0   | 8   | 0.2864 | 1          | 0.2864 | 0 | 0 | 0 | 1 Ref     |
| KT264790 | Unassigned | Unassigned | Unassigned | 1126_0 | Clustered           | 8 VC_1126_0   | 8   | 0.2864 | 1          | 0.2864 | 0 | 0 | 0 | 1 Ref     |
| KT264791 | Unassigned | Unassigned | Unassigned | 1127_0 | Clustered           | 19 VC_1127_0  | 19  | 0.7611 | 1          | 0.7611 | 0 | 0 | 0 | 1 Ref     |
| KT264792 | Unassigned | Unassigned | Unassigned | 1127_0 | Clustered           | 19 VC_1127_0  | 19  | 0.7611 | 1          | 0.7611 | 0 | 0 | 0 | 1 Ref     |
| KT264793 | Unassigned | Unassigned | Unassigned | 1127_0 | Clustered           | 19 VC_1127_0  | 19  | 0.7611 | 1          | 0.7611 | 0 | 0 | 0 | 1 Ref     |
| KT264794 | Unassigned | Unassigned | Unassigned | 1128_0 | Clustered           | 2 VC_1128_0   | 2   | 0.0904 | 0.95143313 | 0.086  | 0 | 0 | 0 | 1 Ref     |
| KT264795 | Unassigned | Unassigned | Unassigned | 1132_0 | Clustered           | 2 VC_1132_0   | 2   | 0.0978 | 0.83194774 | 0.0814 | 0 | 0 | 0 | 1 Ref     |
| KT264796 | Unassigned | Unassigned | Unassigned | 1125_0 | Clustered           | 20 VC_1125_0  | 20  | 0.5599 | 1          | 0.5599 | 0 | 0 | 0 | 1 Ref     |
| KT264797 | Unassigned | Unassigned | Unassigned | 1125_0 | Clustered           | 20 VC_1125_0  | 20  | 0.5599 | 1          | 0.5599 | 0 | 0 | 0 | 1 Ref     |
| KT264798 | Unassigned | Unassigned | Unassigned | 1124_0 | Clustered           | 10 VC_1124_0  | 10  | 0.6268 | 1          | 0.6268 | 0 | 0 | 0 | 1 Ref     |
| KT264799 | Unassigned | Unassigned | Unassigned | 1124_0 | Clustered           | 10 VC_1124_0  | 10  | 0.6268 | 1          | 0.6268 | 0 | 0 | 0 | 1 Ref     |
| KT264800 | Unassigned | Unassigned | Unassigned | 1124_0 | Clustered           | 10 VC_1124_0  | 10  | 0.6268 | 1          | 0.6268 | 0 | 0 | 0 | 1 Ref     |
| KT264801 | Unassigned | Unassigned | Unassigned | 1124_0 | Clustered           | 10 VC_1124_0  | 10  | 0.6268 | 1          | 0.6268 | 0 | 0 | 0 | 1 Ref     |
| KT264802 | Unassigned | Unassigned | Unassigned | 1137_0 | Clustered           | 3 VC_1137_0   | 3   | 0.9176 | 0.93067968 | 0.854  | 0 | 0 | 0 | 1 Ref     |
| KT264803 | Unassigned | Unassigned | Unassigned | 1136_0 | Clustered           | 2 VC_1136_0   | 2   | 0.58   | 0.88261817 | 0.5119 | 0 | 0 | 0 | 1 Ref     |
| KT264805 | Unassigned | Unassigned | Unassigned | 1138_0 | Clustered           | 4 VC_1138_0   | 4   | 0.9437 | 0.98964986 | 0.934  | 0 | 0 | 0 | 1 Ref     |
| KT264806 | Unassigned | Unassigned | Unassigned | 1139_0 | Clustered           | 4 VC_1139_0   | 4   | 1      | 1          | 1      | 0 | 0 | 0 | 1 Ref     |
| KT264807 | Unassigned | Unassigned | Unassigned | 1056_0 | Clustered           | 4 VC_1056_0   | 4   | 0.169  | 0.84110627 | 0.1421 | 0 | 0 | 0 | 1 Ref     |
| KT264808 | Unassigned | Unassigned | Unassigned | 1066_0 | Clustered           | 52 VC_1066_0  | 52  | 0.7682 | 1          | 0.7682 | 0 | 0 | 0 | 1 Ref     |
| KT264809 | Unassigned | Unassigned | Unassigned | 1066_0 | Clustered           | 52 VC_1066_0  | 52  | 0.7682 | 1          | 0.7682 | 0 | 0 | 0 | 1 Ref     |
| KT264810 | Unassigned | Unassigned | Unassigned | 1066_0 | Clustered           | 52 VC_1066_0  | 52  | 0.7682 | 1          | 0.7682 | 0 | 0 | 0 | 1 Ref     |
| KT264811 | Unassigned | Unassigned | Unassigned | 398_0  | Clustered           | 48 VC_398_0   | 48  | 0.4813 | 1          | 0.4813 | 0 | 0 | 0 | 1 Ref     |
| KT264812 | Unassigned | Unassigned | Unassigned | 1085_0 | Clustered           | 2 VC_1085_0   | 2   | 0.5907 | 0.9331928  | 0.5513 | 0 | 0 | 0 | 1 Ref     |
| KT264813 | Unassigned | Unassigned | Unassigned | 995_0  | Clustered           | 69 VC_995_0   | 69  | 0.8547 | 1          | 0.8547 | 0 | 0 | 0 | 1 Ref     |
| KT264814 | Unassigned | Unassigned | Unassigned | 995_0  | Clustered           | 69 VC_995_0   | 69  | 0.8547 | 1          | 0.8547 | 0 | 0 | 0 | 1 Ref     |
| KT264815 | Unassigned | Unassigned | Unassigned | 995_0  | Clustered           | 69 VC_995_0   | 69  | 0.8547 | 1          | 0.8547 | 0 | 0 | 0 | 1 Ref     |
| KT264818 | Unassigned | Unassigned | Unassigned | 1143_0 | Clustered           | 9 VC_1143_0   | 9   | 0.7268 | 1          | 0.7268 | 0 | 0 | 0 | 1 Ref     |
| KT264819 | Unassigned | Unassigned | Unassigned | 1143_0 | Clustered           | 9 VC_1143_0   | 9   | 0.7268 | 1          | 0.7268 | 0 | 0 | 0 | 1 Ref     |
| KT264820 | Unassigned | Unassigned | Unassigned | 1140_0 | Clustered           | 4 VC_1140_0   | 4   | 0.1325 | 0.66207199 | 0.0877 | 0 | 0 | 0 | 1 Ref     |
| KT264821 | Unassigned | Unassigned | Unassigned | 1140_0 | Clustered           | 4 VC_1140_0   | 4   | 0.1325 | 0.66207199 | 0.0877 | 0 | 0 | 0 | 1 Ref     |
| KT264822 | Unassigned | Unassigned | Unassigned | 1147_0 | Clustered           | 3 VC_1147_0   | 3   | 0.4334 | 0.65335909 | 0.2832 | 0 | 0 | 0 | 1 Ref     |
| KT264823 | Unassigned | Unassigned | Unassigned | 1148_0 | Clustered           | 16 VC_1148_0  | 16  | 0.8821 | 1          | 0.8821 | 0 | 0 | 0 | 1 Ref     |
| KT264824 | Unassigned | Unassigned | Unassigned | 1148_0 | Clustered           | 16 VC_1148_0  | 16  | 0.8821 | 1          | 0.8821 | 0 | 0 | 0 | 1 Ref     |
| KT264825 | Unassigned | Unassigned | Unassigned | 1148_0 | Clustered           | 16 VC_1148_0  | 16  | 0.8821 | 1          | 0.8821 | 0 | 0 | 0 | 1 Ref     |
| KT264826 | Unassigned | Unassigned | Unassigned | 1054_0 | Clustered           | 12 VC_1054_0  | 12  | 0.2863 | 0.99746644 | 0.2855 | 0 | 0 | 0 | 1 Ref     |
| KT264827 | Unassigned | Unassigned | Unassigned | 1054_0 | Clustered           | 12 VC_1054_0  | 12  | 0.2863 | 0.99746644 | 0.2855 | 0 | 0 | 0 | 1 Ref     |
| KT264828 | Unassigned | Unassigned | Unassigned | 1151_0 | Clustered           | 9 VC_1151_0   | 9   | 0.8548 | 1          | 0.8548 | 0 | 0 | 0 | 1 Ref     |
| KT264829 | Unassigned | Unassigned | Unassigned | 1056_0 | Clustered           | 4 VC_1056_0   | 4   | 0.169  | 0.84110627 | 0.1421 | 0 | 0 | 0 | 1 Ref     |
| KT264830 | Unassigned | Unassigned | Unassigned | 1147_0 | Clustered           | 3 VC_1147_0   | 3   | 0.4334 | 0.65335909 | 0.2832 | 0 | 0 | 0 | 1 Ref     |
| KT264831 | Unassigned | Unassigned | Unassigned | 1153_0 | Clustered           | 2 VC_1153_0   | 2   | 0.073  | 0.80562642 | 0.0588 | 0 | 0 | 0 | 1 Ref     |
| KT264833 | Unassigned | Unassigned | Unassigned | 1154_0 | Clustered           | 5 VC_1154_0   | 5   | 1      | 1          | 1      | 0 | 0 | 0 | 1 Ref     |
| KT264834 | Unassigned | Unassigned | Unassigned | 1155_0 | Clustered           | 2 VC_1155_0   | 2   | 1      | 1          | 1      | 0 | 0 | 0 | 1 Ref     |
| KT270441 | Unassigned | Unassigned | Unassigned | 372_0  | Clustered           | 24 VC_372_0   | 24  | 0.5539 | 1          | 0.5539 | 0 | 0 | 0 | 1 Ref     |
| KT279576 | Unassigned | Unassigned | Unassigned | 520_60 | Clustered           | 2 VC_520_60   | 2   | 0.0091 | 0.95761233 | 0.0087 | 0 | 0 | 0 | 1 Ref     |
| KT281790 | Unassigned | Unassigned | Unassigned | 558_11 | Clustered           | 2 VC_558_11   | 2   | 0.0032 | 0.78528587 | 0.0025 | 0 | 0 | 0 | 1 Ref     |
| KT281791 | Unassigned | Unassigned | Unassigned | 889_0  | Clustered           | 16 VC_889_0   | 16  | 0.2969 | 1          | 0.2969 | 0 | 0 | 0 | 1 Ref     |
| KT281792 | Unassigned | Unassigned | Unassigned | 520_27 | Clustered           | 2 VC_520_27   | 2   | 0.0143 | 0.95761635 | 0.0137 | 0 | 0 | 0 | 1 Ref     |
| KT281793 | Unassigned | Unassigned | Unassigned | 520_13 | Clustered/Singleton | 1 VC_520_13   | 1   | 0      | 1          | 0      | 0 | 0 | 0 | 1 Ref     |
| KT281794 | Unassigned | Unassigned | Unassigned | 889_0  | Clustered           | 16 VC_889_0   | 16  | 0.2969 | 1          | 0.2969 | 0 | 0 | 0 | 1 Ref     |
| KT281795 | Unassigned | Unassigned | Unassigned | 520_31 | Clustered           | 11 VC_520_31  | 11  | 0.0897 | 1          | 0.0897 | 0 | 0 | 0 | 0.6 Ref   |
| KT281796 | Unassigned | Unassigned | Unassigned | 556_0  | Clustered           | 21 VC_556_0   | 21  | 0.9912 | 1          | 0.9912 | 0 | 0 | 0 | 1 Ref     |
| KT285706 | Unassigned | Unassigned | Unassigned | 225_0  | Clustered           | 32 VC_225_0   | 32  | 0.848  | 1          | 0.848  | 0 | 0 | 0 | 0.996 Ref |
| KT287080 | Unassigned | Unassigned | Unassigned | 540_0  | Clustered           | 15 VC_540_0   | 15  | 0.2866 | 1          | 0.2866 | 0 | 0 | 0 | 1 Ref     |
| KT307976 | Unassigned | Unassigned | Unassigned | 883_1  | Clustered           | 12 VC_883_1   | 12  | 0.2441 | 1          | 0.2441 | 0 | 0 | 0 | 1 Ref     |
| KT309034 | Unassigned | Unassigned | Unassigned | 520_0  | Clustered/Singleton | 1 VC_520_0    | 1   | 0      | 1          | 0      | 0 | 0 | 0 | 1 Ref     |
| KT321314 | Unassigned | Unassigned | Unassigned | 388_0  | Clustered           | 4 VC_388_0    | 4   | 0.0345 | 0.99998812 | 0.0345 | 0 | 0 | 0 | 1 Ref     |
| KT321315 | Unassigned | Unassigned | Unassigned | 668_0  | Clustered           | 25 VC_668_0   | 25  | 0.5539 | 1          | 0.5539 | 0 | 0 | 0 | 0.96 Ref  |
| KT321316 | Unassigned | Unassigned | Unassigned | 594_0  | Clustered           | 2 VC_594_0    | 2   | 0.0737 | 0.95685859 | 0.0705 | 0 | 0 | 0 | 1 Ref     |
| KT321317 | Unassigned | Unassigned | Unassigned | 779_1  | Clustered           | 11 VC_779_1   | 11  | 0.1587 | 1          | 0.1587 | 0 | 0 | 0 | 1 Ref     |



|          |            |            |            |        |                     |              |     |        |            |        |   |   |   |        |     |
|----------|------------|------------|------------|--------|---------------------|--------------|-----|--------|------------|--------|---|---|---|--------|-----|
| KT321476 | Unassigned | Unassigned | Unassigned | 558_50 | Clustered           | 15 VC_558_50 | 15  | 0.0468 | 1          | 0.0468 | 0 | 0 | 0 | 0.9238 | Ref |
| KT326767 | Unassigned | Unassigned | Unassigned | 513_0  | Clustered           | 32 VC_513_0  | 32  | 0.6881 | 1          | 0.6881 | 0 | 0 | 0 | 1      | Ref |
| KT326768 | Unassigned | Unassigned | Unassigned | 325_30 | Clustered           | 4 VC_325_30  | 4   | 0.0144 | 0.99998616 | 0.0144 | 0 | 0 | 0 | 0.8333 | Ref |
| KT336320 | Unassigned | Unassigned | Unassigned | 632_0  | Clustered           | 37 VC_632_0  | 37  | 0.581  | 1          | 0.581  | 0 | 0 | 0 | 0.9234 | Ref |
| KT336321 | Unassigned | Unassigned | Unassigned | 632_0  | Clustered           | 37 VC_632_0  | 37  | 0.581  | 1          | 0.581  | 0 | 0 | 0 | 0.9234 | Ref |
| KT337339 | Unassigned | Unassigned | Unassigned | 414_0  | Clustered           | 37 VC_414_0  | 37  | 0.585  | 1          | 0.585  | 0 | 0 | 0 | 0.9474 | Ref |
| KT337340 | Unassigned | Unassigned | Unassigned | 414_0  | Clustered           | 37 VC_414_0  | 37  | 0.585  | 1          | 0.585  | 0 | 0 | 0 | 0.9474 | Ref |
| KT337341 | Unassigned | Unassigned | Unassigned | 414_0  | Clustered           | 37 VC_414_0  | 37  | 0.585  | 1          | 0.585  | 0 | 0 | 0 | 0.9474 | Ref |
| KT337342 | Unassigned | Unassigned | Unassigned | 333_0  | Clustered           | 25 VC_333_0  | 25  | 0.4681 | 1          | 0.4681 | 0 | 0 | 0 | 1      | Ref |
| KT337352 | Unassigned | Unassigned | Unassigned | 414_0  | Clustered           | 37 VC_414_0  | 37  | 0.585  | 1          | 0.585  | 0 | 0 | 0 | 0.9474 | Ref |
| KT337354 | Unassigned | Unassigned | Unassigned | 414_0  | Clustered           | 37 VC_414_0  | 37  | 0.585  | 1          | 0.585  | 0 | 0 | 0 | 0.9474 | Ref |
| KT337355 | Unassigned | Unassigned | Unassigned | 414_0  | Clustered           | 37 VC_414_0  | 37  | 0.585  | 1          | 0.585  | 0 | 0 | 0 | 0.9474 | Ref |
| KT337356 | Unassigned | Unassigned | Unassigned | 414_0  | Clustered           | 37 VC_414_0  | 37  | 0.585  | 1          | 0.585  | 0 | 0 | 0 | 0.9474 | Ref |
| KT337358 | Unassigned | Unassigned | Unassigned | 412_0  | Clustered           | 39 VC_412_0  | 39  | 0.845  | 1          | 0.845  | 0 | 0 | 0 | 1      | Ref |
| KT337359 | Unassigned | Unassigned | Unassigned | 414_0  | Clustered           | 37 VC_414_0  | 37  | 0.585  | 1          | 0.585  | 0 | 0 | 0 | 0.9474 | Ref |
| KT337360 | Unassigned | Unassigned | Unassigned | 317_2  | Clustered           | 20 VC_317_2  | 20  | 0.1976 | 1          | 0.1976 | 0 | 0 | 0 | 0.6842 | Ref |
| KT337362 | Unassigned | Unassigned | Unassigned | 414_0  | Clustered           | 37 VC_414_0  | 37  | 0.585  | 1          | 0.585  | 0 | 0 | 0 | 0.9474 | Ref |
| KT337364 | Unassigned | Unassigned | Unassigned | 412_0  | Clustered           | 39 VC_412_0  | 39  | 0.845  | 1          | 0.845  | 0 | 0 | 0 | 1      | Ref |
| KT339321 | Unassigned | Unassigned | Unassigned | 699_0  | Clustered           | 71 VC_699_0  | 71  | 0.9352 | 1          | 0.9352 | 0 | 0 | 0 | 1      | Ref |
| KT344895 | Unassigned | Unassigned | Unassigned | 12_0   | Clustered           | 21 VC_12_0   | 21  | 0.2274 | 1          | 0.2274 | 0 | 0 | 0 | 0.9571 | Ref |
| KT345706 | Unassigned | Unassigned | Unassigned | 971_2  | Clustered/Singleton | 1 VC_971_2   | 1   | 0      | 1          | 0      | 0 | 0 | 0 | 1      | Ref |
| KT347313 | Unassigned | Unassigned | Unassigned | 519_0  | Clustered           | 39 VC_519_0  | 39  | 0.8156 | 1          | 0.8156 | 0 | 0 | 0 | 1      | Ref |
| KT347314 | Unassigned | Unassigned | Unassigned | 761_0  | Clustered           | 67 VC_761_0  | 67  | 0.8947 | 1          | 0.8947 | 0 | 0 | 0 | 1      | Ref |
| KT353109 | Unassigned | Unassigned | Unassigned | 849_5  | Clustered           | 3 VC_849_5   | 3   | 0.0492 | 0.97574727 | 0.048  | 0 | 0 | 0 | 1      | Ref |
| KT355471 | Unassigned | Unassigned | Unassigned | 950_0  | Clustered           | 38 VC_950_0  | 38  | 0.9443 | 1          | 0.9443 | 0 | 0 | 0 | 1      | Ref |
| KT355472 | Unassigned | Unassigned | Unassigned | 761_0  | Clustered           | 67 VC_761_0  | 67  | 0.8947 | 1          | 0.8947 | 0 | 0 | 0 | 1      | Ref |
| KT355473 | Unassigned | Unassigned | Unassigned | 950_0  | Clustered           | 38 VC_950_0  | 38  | 0.9443 | 1          | 0.9443 | 0 | 0 | 0 | 1      | Ref |
| KT355474 | Unassigned | Unassigned | Unassigned | 761_0  | Clustered           | 67 VC_761_0  | 67  | 0.8947 | 1          | 0.8947 | 0 | 0 | 0 | 1      | Ref |
| KT355475 | Unassigned | Unassigned | Unassigned | 950_0  | Clustered           | 38 VC_950_0  | 38  | 0.9443 | 1          | 0.9443 | 0 | 0 | 0 | 1      | Ref |
| KT359365 | Unassigned | Unassigned | Unassigned | 514_0  | Clustered           | 75 VC_514_0  | 75  | 0.9402 | 1          | 0.9402 | 0 | 0 | 0 | 1      | Ref |
| KT361649 | Unassigned | Unassigned | Unassigned | 708_0  | Clustered           | 47 VC_708_0  | 47  | 0.8654 | 1          | 0.8654 | 0 | 0 | 0 | 1      | Ref |
| KT361650 | Unassigned | Unassigned | Unassigned | 708_0  | Clustered           | 47 VC_708_0  | 47  | 0.8654 | 1          | 0.8654 | 0 | 0 | 0 | 1      | Ref |
| KT361652 | Unassigned | Unassigned | Unassigned | 708_0  | Clustered           | 47 VC_708_0  | 47  | 0.8654 | 1          | 0.8654 | 0 | 0 | 0 | 1      | Ref |
| KT361654 | Unassigned | Unassigned | Unassigned | 620_0  | Clustered           | 27 VC_620_0  | 27  | 0.879  | 1          | 0.879  | 0 | 0 | 0 | 1      | Ref |
| KT361655 | Unassigned | Unassigned | Unassigned | 620_0  | Clustered           | 27 VC_620_0  | 27  | 0.879  | 1          | 0.879  | 0 | 0 | 0 | 1      | Ref |
| KT361656 | Unassigned | Unassigned | Unassigned | 620_0  | Clustered           | 27 VC_620_0  | 27  | 0.879  | 1          | 0.879  | 0 | 0 | 0 | 1      | Ref |
| KT361657 | Unassigned | Unassigned | Unassigned | 620_0  | Clustered           | 27 VC_620_0  | 27  | 0.879  | 1          | 0.879  | 0 | 0 | 0 | 1      | Ref |
| KT361920 | Unassigned | Unassigned | Unassigned | 234_0  | Clustered           | 21 VC_234_0  | 21  | 0.8355 | 1          | 0.8355 | 0 | 0 | 0 | 1      | Ref |
| KT363731 | Unassigned | Unassigned | Unassigned | 325_42 | Clustered           | 4 VC_325_42  | 4   | 0.0112 | 0.99980442 | 0.0112 | 0 | 0 | 0 | 0.6667 | Ref |
| KT363872 | Unassigned | Unassigned | Unassigned | 330_0  | Clustered           | 27 VC_330_0  | 27  | 0.5088 | 1          | 0.5088 | 0 | 0 | 0 | 0.8661 | Ref |
| KT364588 | Unassigned | Unassigned | Unassigned | 371_4  | Clustered           | 5 VC_371_4   | 5   | 0.0135 | 0.99999971 | 0.0135 | 0 | 0 | 0 | 1      | Ref |
| KT365397 | Unassigned | Unassigned | Unassigned | 517_1  | Clustered           | 108 VC_517_1 | 108 | 0.8483 | 1          | 0.8483 | 0 | 0 | 0 | 0.9955 | Ref |
| KT365398 | Unassigned | Unassigned | Unassigned | 558_6  | Clustered           | 2 VC_558_6   | 2   | 0.0032 | 0.73149279 | 0.0023 | 0 | 0 | 0 | 1      | Ref |
| KT365399 | Unassigned | Unassigned | Unassigned | 761_0  | Clustered           | 67 VC_761_0  | 67  | 0.8947 | 1          | 0.8947 | 0 | 0 | 0 | 1      | Ref |
| KT365400 | Unassigned | Unassigned | Unassigned | 558_37 | Clustered/Singleton | 1 VC_558_37  | 1   | 0      | 1          | 0      | 0 | 0 | 0 | 1      | Ref |
| KT365401 | Unassigned | Unassigned | Unassigned | 1073_0 | Clustered           | 24 VC_1073_0 | 24  | 0.8388 | 1          | 0.8388 | 0 | 0 | 0 | 1      | Ref |
| KT365402 | Unassigned | Unassigned | Unassigned | 508_0  | Clustered           | 32 VC_508_0  | 32  | 0.906  | 1          | 0.906  | 0 | 0 | 0 | 1      | Ref |
| KT367885 | Unassigned | Unassigned | Unassigned | 823_0  | Clustered           | 124 VC_823_0 | 124 | 0.9492 | 1          | 0.9492 | 0 | 0 | 0 | 1      | Ref |
| KT367886 | Unassigned | Unassigned | Unassigned | 111_0  | Clustered           | 91 VC_111_0  | 91  | 0.9587 | 1          | 0.9587 | 0 | 0 | 0 | 1      | Ref |
| KT367887 | Unassigned | Unassigned | Unassigned | 836_0  | Clustered           | 9 VC_836_0   | 9   | 0.7733 | 1          | 0.7733 | 0 | 0 | 0 | 1      | Ref |
| KT372002 | Unassigned | Unassigned | Unassigned | 956_0  | Clustered           | 39 VC_956_0  | 39  | 1      | 1          | 1      | 0 | 0 | 0 | 1      | Ref |
| KT372003 | Unassigned | Unassigned | Unassigned | 889_0  | Clustered           | 16 VC_889_0  | 16  | 0.2969 | 1          | 0.2969 | 0 | 0 | 0 | 1      | Ref |
| KT372690 | Unassigned | Unassigned | Unassigned | 80_0   | Clustered           | 41 VC_80_0   | 41  | 0.5837 | 1          | 0.5837 | 0 | 0 | 0 | 0.9805 | Ref |
| KT372691 | Unassigned | Unassigned | Unassigned | 80_0   | Clustered           | 41 VC_80_0   | 41  | 0.5837 | 1          | 0.5837 | 0 | 0 | 0 | 0.9805 | Ref |
| KT372692 | Unassigned | Unassigned | Unassigned | 80_0   | Clustered           | 41 VC_80_0   | 41  | 0.5837 | 1          | 0.5837 | 0 | 0 | 0 | 0.9805 | Ref |
| KT372693 | Unassigned | Unassigned | Unassigned | 80_0   | Clustered           | 41 VC_80_0   | 41  | 0.5837 | 1          | 0.5837 | 0 | 0 | 0 | 0.9805 | Ref |
| KT372694 | Unassigned | Unassigned | Unassigned | 80_0   | Clustered           | 41 VC_80_0   | 41  | 0.5837 | 1          | 0.5837 | 0 | 0 | 0 | 0.9805 | Ref |
| KT372695 | Unassigned | Unassigned | Unassigned | 80_0   | Clustered           | 41 VC_80_0   | 41  | 0.5837 | 1          | 0.5837 | 0 | 0 | 0 | 0.9805 | Ref |
| KT372696 | Unassigned | Unassigned | Unassigned | 80_0   | Clustered           | 41 VC_80_0   | 41  | 0.5837 | 1          | 0.5837 | 0 | 0 | 0 | 0.9805 | Ref |
| KT372697 | Unassigned | Unassigned | Unassigned | 80_0   | Clustered           | 41 VC_80_0   | 41  | 0.5837 | 1          | 0.5837 | 0 | 0 | 0 | 0.9805 | Ref |
| KT372698 | Unassigned | Unassigned | Unassigned | 80_0   | Clustered           | 41 VC_80_0   | 41  | 0.5837 | 1          | 0.5837 | 0 | 0 | 0 | 0.9805 | Ref |
| KT372714 | Unassigned | Unassigned | Unassigned | 20_0   | Clustered           | 5 VC_20_0    | 5   | 0.4387 | 0.99999934 | 0.4387 | 0 | 0 | 0 | 1      | Ref |
| KT373978 | Unassigned | Unassigned | Unassigned | 551_7  | Clustered           | 28 VC_551_7  | 28  | 0.1661 | 1          | 0.1661 | 0 | 0 | 0 | 0.8519 | Ref |
| KT375356 | Unassigned | Unassigned | Unassigned | 956_0  | Clustered           | 39 VC_956_0  | 39  | 1      | 1          | 1      | 0 | 0 | 0 | 1      | Ref |
| KT381276 | Unassigned | Unassigned | Unassigned | 215_2  | Clustered           | 5 VC_215_2   | 5   | 0.0572 | 0.99999997 | 0.0572 | 0 | 0 | 0 | 1      | Ref |
| KT381277 | Unassigned | Unassigned | Unassigned | 514_0  | Clustered           | 75 VC_514_0  | 75  | 0.9402 | 1          | 0.9402 | 0 | 0 | 0 | 1      | Ref |
| KT381864 | Unassigned | Unassigned | Unassigned | 182_0  | Clustered           | 5 VC_182_0   | 5   | 0.6184 | 0.99999967 | 0.6184 | 0 | 0 | 0 | 1      | Ref |
| KT381865 | Unassigned | Unassigned | Unassigned | 182_0  | Clustered           | 5 VC_182_0   | 5   | 0.6184 | 0.99999967 | 0.6184 | 0 | 0 | 0 | 1      | Ref |
| KT381879 | Unassigned | Unassigned | Unassigned | 70_0   | Clustered           | 27 VC_70_0   | 27  | 0.5981 | 1          | 0.5981 | 0 | 0 | 0 | 0.9886 | Ref |
| KT381880 | Unassigned | Unassigned | Unassigned | 669_0  | Clustered           | 21 VC_669_0  | 21  | 0.3623 | 1          | 0.3623 | 0 | 0 | 0 | 1      | Ref |
| KT388014 | Unassigned | Unassigned | Unassigned | 325_53 | Clustered           | 7 VC_325_53  | 7   | 0.0242 | 1          | 0.0242 | 0 | 0 | 0 | 0.9048 | Ref |
| KT388093 | Unassigned | Unassigned | Unassigned | 412_0  | Clustered           | 39 VC_412_0  | 39  | 0.845  | 1          | 0.845  | 0 | 0 | 0 | 1      | Ref |
| KT388102 | Unassigned | Unassigned | Unassigned | 699_0  | Clustered           | 71 VC_699_0  | 71  | 0.9352 | 1          | 0.9352 | 0 | 0 | 0 | 1      | Ref |
| KT388103 | Unassigned | Unassigned | Unassigned | 699_0  | Clustered           | 71 VC_699_0  | 71  | 0.9352 | 1          | 0.9352 | 0 | 0 | 0 | 1      | Ref |
| KT429160 | Unassigned | Unassigned | Unassigned | 213_0  | Clustered           | 2 VC_213_0   | 2   | 0.4293 | 0.95300227 | 0.4091 | 0 | 0 | 0 | 1      | Ref |
| KT438500 | Unassigned | Unassigned | Unassigned | 325_9  | Clustered           | 2 VC_325_9   | 2   | 0.0055 | 0.95750934 | 0.0053 | 0 | 0 | 0 | 1      | Ref |
| KT438501 | Unassigned | Unassigned | Unassigned | 940_0  | Clustered           | 34 VC_940_0  | 34  | 0.7959 | 1          | 0.7959 | 0 | 0 | 0 | 1      | Ref |
| KT454805 | Unassigned | Unassigned | Unassigned | 330_0  | Clustered           | 27 VC_330_0  | 27  | 0.5088 | 1          | 0.5088 | 0 | 0 | 0 | 0.8661 | Ref |
| KT454806 | Unassigned | Unassigned | Unassigned | 330_0  | Clustered           | 27 VC_330_0  | 27  | 0.5088 | 1          | 0.5088 | 0 | 0 | 0 | 0.8661 | Ref |
| KT454972 | Unassigned | Unassigned | Unassigned | 810_0  | Clustered           | 18 VC_810_0  | 18  | 0.9121 | 1          | 0.9121 | 0 | 0 | 0 | 1      | Ref |
| KT588073 | Unassigned | Unassigned | Unassigned | 696_1  | Clustered           | 8 VC_696_1   | 8   | 0.5452 | 1          | 0.5452 | 0 | 0 | 0 | 0.9286 | Ref |



|          |            |            |            |        |                     |              |     |        |            |        |   |   |   |            |
|----------|------------|------------|------------|--------|---------------------|--------------|-----|--------|------------|--------|---|---|---|------------|
| KT588074 | Unassigned | Unassigned | Unassigned | 242_0  | Clustered           | 2 VC_242_0   | 2   | 0.0867 | 0.95379254 | 0.0827 | 0 | 0 | 0 | 1 Ref      |
| KT588075 | Unassigned | Unassigned | Unassigned | 696_0  | Clustered           | 2 VC_696_0   | 2   | 0.1624 | 0.94573679 | 0.1536 | 0 | 0 | 0 | 1 Ref      |
| KT588442 | Unassigned | Unassigned | Unassigned | 216_6  | Clustered           | 42 VC_216_6  | 42  | 0.473  | 1          | 0.473  | 0 | 0 | 0 | 0.8351 Ref |
| KT591076 | Unassigned | Unassigned | Unassigned | 568_0  | Clustered           | 8 VC_568_0   | 8   | 0.5738 | 1          | 0.5738 | 0 | 0 | 0 | 1 Ref      |
| KT591489 | Unassigned | Unassigned | Unassigned | 888_0  | Clustered           | 28 VC_888_0  | 28  | 0.5497 | 1          | 0.5497 | 0 | 0 | 0 | 1 Ref      |
| KT591491 | Unassigned | Unassigned | Unassigned | 763_1  | Clustered           | 9 VC_763_1   | 9   | 0.3706 | 1          | 0.3706 | 0 | 0 | 0 | 1 Ref      |
| KT599441 | Unassigned | Unassigned | Unassigned | 371_15 | Clustered           | 44 VC_371_15 | 44  | 0.1391 | 1          | 0.1391 | 0 | 0 | 0 | 0.7474 Ref |
| KT624200 | Unassigned | Unassigned | Unassigned | 88_0   | Clustered/Singleton | 1 VC_88_0    | 1   | 0      | 1          | 0      | 0 | 0 | 0 | 1 Ref      |
| KT626047 | Unassigned | Unassigned | Unassigned | 325_5  | Clustered           | 11 VC_325_5  | 11  | 0.047  | 1          | 0.047  | 0 | 0 | 0 | 0.7636 Ref |
| KT626446 | Unassigned | Unassigned | Unassigned | 143_0  | Clustered           | 2 VC_143_0   | 2   | 0.1189 | 0.94995671 | 0.1129 | 0 | 0 | 0 | 1 Ref      |
| KT630644 | Unassigned | Unassigned | Unassigned | 228_0  | Clustered           | 60 VC_228_0  | 60  | 0.942  | 1          | 0.942  | 0 | 0 | 0 | 1 Ref      |
| KT630647 | Unassigned | Unassigned | Unassigned | 6_0    | Clustered           | 44 VC_6_0    | 44  | 0.908  | 1          | 0.908  | 0 | 0 | 0 | 1 Ref      |
| KT630649 | Unassigned | Unassigned | Unassigned | 242_1  | Clustered           | 20 VC_242_1  | 20  | 0.684  | 1          | 0.684  | 0 | 0 | 0 | 0.8368 Ref |
| KT716493 | Unassigned | Unassigned | Unassigned | 517_1  | Clustered           | 108 VC_517_1 | 108 | 0.8483 | 1          | 0.8483 | 0 | 0 | 0 | 0.9955 Ref |
| KT717083 | Unassigned | Unassigned | Unassigned | 252_0  | Clustered           | 121 VC_252_0 | 121 | 0.7376 | 1          | 0.7376 | 0 | 0 | 0 | 0.9999 Ref |
| KT717084 | Unassigned | Unassigned | Unassigned | 252_0  | Clustered           | 121 VC_252_0 | 121 | 0.7376 | 1          | 0.7376 | 0 | 0 | 0 | 0.9999 Ref |
| KT717085 | Unassigned | Unassigned | Unassigned | 252_0  | Clustered           | 121 VC_252_0 | 121 | 0.7376 | 1          | 0.7376 | 0 | 0 | 0 | 0.9999 Ref |
| KT725776 | Unassigned | Unassigned | Unassigned | 654_0  | Clustered           | 4 VC_654_0   | 4   | 0.2897 | 0.99998263 | 0.2897 | 0 | 0 | 0 | 1 Ref      |
| KT728930 | Unassigned | Unassigned | Unassigned | 875_0  | Clustered           | 10 VC_875_0  | 10  | 0.988  | 0.99948433 | 0.9875 | 0 | 0 | 0 | 1 Ref      |
| KT728931 | Unassigned | Unassigned | Unassigned | 875_0  | Clustered           | 10 VC_875_0  | 10  | 0.988  | 0.99948433 | 0.9875 | 0 | 0 | 0 | 1 Ref      |
| KT734862 | Unassigned | Unassigned | Unassigned | 166_0  | Clustered           | 26 VC_166_0  | 26  | 0.7923 | 1          | 0.7923 | 0 | 0 | 0 | 1 Ref      |
| KT736033 | Unassigned | Unassigned | Unassigned | 76_0   | Clustered           | 37 VC_76_0   | 37  | 0.9403 | 1          | 0.9403 | 0 | 0 | 0 | 1 Ref      |
| KT755656 | Unassigned | Unassigned | Unassigned | 1156_0 | Clustered           | 8 VC_1156_0  | 8   | 0.8137 | 1          | 0.8137 | 0 | 0 | 0 | 1 Ref      |
| KT783672 | Unassigned | Unassigned | Unassigned | 950_0  | Clustered           | 38 VC_950_0  | 38  | 0.9443 | 1          | 0.9443 | 0 | 0 | 0 | 1 Ref      |
| KT804908 | Unassigned | Unassigned | Unassigned | 699_0  | Clustered           | 71 VC_699_0  | 71  | 0.9352 | 1          | 0.9352 | 0 | 0 | 0 | 1 Ref      |
| KT804923 | Unassigned | Unassigned | Unassigned | 76_0   | Clustered           | 37 VC_76_0   | 37  | 0.9403 | 1          | 0.9403 | 0 | 0 | 0 | 1 Ref      |
| KT809302 | Unassigned | Unassigned | Unassigned | 666_0  | Clustered           | 4 VC_666_0   | 4   | 1      | 1          | 1      | 0 | 0 | 0 | 1 Ref      |
| KT809368 | Unassigned | Unassigned | Unassigned | 10_0   | Clustered           | 25 VC_10_0   | 25  | 0.3467 | 1          | 0.3467 | 0 | 0 | 0 | 0.9733 Ref |
| KT809369 | Unassigned | Unassigned | Unassigned | 10_0   | Clustered           | 25 VC_10_0   | 25  | 0.3467 | 1          | 0.3467 | 0 | 0 | 0 | 0.9733 Ref |
| KT818595 | Unassigned | Unassigned | Unassigned | 325_14 | Clustered           | 3 VC_325_14  | 3   | 0.0094 | 0.99859159 | 0.0094 | 0 | 0 | 0 | 1 Ref      |
| KT825490 | Unassigned | Unassigned | Unassigned | 455_0  | Clustered           | 18 VC_455_0  | 18  | 0.4598 | 1          | 0.4598 | 0 | 0 | 0 | 1 Ref      |
| KT852578 | Unassigned | Unassigned | Unassigned | 20_0   | Clustered           | 5 VC_20_0    | 5   | 0.4387 | 0.99999934 | 0.4387 | 0 | 0 | 0 | 1 Ref      |
| KT870145 | Unassigned | Unassigned | Unassigned | 977_0  | Clustered           | 2 VC_977_0   | 2   | 0.0806 | 0.93920319 | 0.0757 | 0 | 0 | 0 | 1 Ref      |
| KT876724 | Unassigned | Unassigned | Unassigned | 1157_0 | Clustered           | 24 VC_1157_0 | 24  | 1      | 1          | 1      | 0 | 0 | 0 | 1 Ref      |
| KT876725 | Unassigned | Unassigned | Unassigned | 1040_0 | Clustered           | 23 VC_1040_0 | 23  | 0.9605 | 1          | 0.9605 | 0 | 0 | 0 | 1 Ref      |
| KT876726 | Unassigned | Unassigned | Unassigned | 1157_0 | Clustered           | 24 VC_1157_0 | 24  | 1      | 1          | 1      | 0 | 0 | 0 | 1 Ref      |
| KT878766 | Unassigned | Unassigned | Unassigned | 10_0   | Clustered           | 25 VC_10_0   | 25  | 0.3467 | 1          | 0.3467 | 0 | 0 | 0 | 0.9733 Ref |
| KT880194 | Unassigned | Unassigned | Unassigned | 508_0  | Clustered           | 32 VC_508_0  | 32  | 0.906  | 1          | 0.906  | 0 | 0 | 0 | 1 Ref      |
| KT881477 | Unassigned | Unassigned | Unassigned | 637_0  | Clustered           | 115 VC_637_0 | 115 | 0.731  | 1          | 0.731  | 0 | 0 | 0 | 0.8764 Ref |
| KT887557 | Unassigned | Unassigned | Unassigned | 176_1  | Clustered           | 2 VC_176_1   | 2   | 0.0363 | 0.95657568 | 0.0347 | 0 | 0 | 0 | 1 Ref      |
| KT887558 | Unassigned | Unassigned | Unassigned | 173_0  | Clustered           | 2 VC_173_0   | 2   | 0.0799 | 0.95489091 | 0.0763 | 0 | 0 | 0 | 1 Ref      |
| KT887559 | Unassigned | Unassigned | Unassigned | 5_0    | Clustered           | 30 VC_5_0    | 30  | 0.9647 | 1          | 0.9647 | 0 | 0 | 0 | 1 Ref      |
| KT895280 | Unassigned | Unassigned | Unassigned | 520_85 | Clustered           | 2 VC_520_85  | 2   | 0.0148 | 0.95762405 | 0.0142 | 0 | 0 | 0 | 1 Ref      |
| KT895281 | Unassigned | Unassigned | Unassigned | 520_45 | Clustered           | 7 VC_520_45  | 7   | 0.0635 | 1          | 0.0635 | 0 | 0 | 0 | 0.8095 Ref |
| KT895374 | Unassigned | Unassigned | Unassigned | 448_1  | Clustered/Singleton | 1 VC_448_1   | 1   | 0      | 1          | 0      | 0 | 0 | 0 | 1 Ref      |
| KT919972 | Unassigned | Unassigned | Unassigned | 531_0  | Clustered           | 9 VC_531_0   | 9   | 0.26   | 1          | 0.26   | 0 | 0 | 0 | 1 Ref      |
| KT919973 | Unassigned | Unassigned | Unassigned | 531_0  | Clustered           | 9 VC_531_0   | 9   | 0.26   | 1          | 0.26   | 0 | 0 | 0 | 1 Ref      |
| KT932418 | Unassigned | Unassigned | Unassigned | 493_0  | Clustered/Singleton | 1 VC_493_0   | 1   | 0      | 1          | 0      | 0 | 0 | 0 | 1 Ref      |
| KT932699 | Unassigned | Unassigned | Unassigned | 108_0  | Clustered           | 33 VC_108_0  | 33  | 0.949  | 1          | 0.949  | 0 | 0 | 0 | 1 Ref      |
| KT932700 | Unassigned | Unassigned | Unassigned | 967_0  | Clustered           | 16 VC_967_0  | 16  | 0.8971 | 1          | 0.8971 | 0 | 0 | 0 | 1 Ref      |
| KT932701 | Unassigned | Unassigned | Unassigned | 695_0  | Clustered           | 48 VC_695_0  | 48  | 0.8162 | 1          | 0.8162 | 0 | 0 | 0 | 1 Ref      |
| KT934381 | Unassigned | Unassigned | Unassigned | 765_0  | Clustered           | 132 VC_765_0 | 132 | 1      | 1          | 1      | 0 | 0 | 0 | 1 Ref      |
| KT934943 | Unassigned | Unassigned | Unassigned | 582_3  | Clustered           | 12 VC_582_3  | 12  | 0.2357 | 1          | 0.2357 | 0 | 0 | 0 | 0.8636 Ref |
| KT945994 | Unassigned | Unassigned | Unassigned | 267_0  | Clustered           | 2 VC_267_0   | 2   | 0.0988 | 0.95557934 | 0.0945 | 0 | 0 | 0 | 1 Ref      |
| KT945995 | Unassigned | Unassigned | Unassigned | 968_0  | Clustered           | 4 VC_968_0   | 4   | 0.2959 | 0.99997642 | 0.2959 | 0 | 0 | 0 | 1 Ref      |
| KT949345 | Unassigned | Unassigned | Unassigned | 878_0  | Clustered           | 32 VC_878_0  | 32  | 0.9965 | 1          | 0.9965 | 0 | 0 | 0 | 1 Ref      |
| KT959213 | Unassigned | Unassigned | Unassigned | 956_0  | Clustered           | 39 VC_956_0  | 39  | 1      | 1          | 1      | 0 | 0 | 0 | 1 Ref      |
| KT962245 | Unassigned | Unassigned | Unassigned | 1017_0 | Clustered           | 5 VC_1017_0  | 5   | 0.9759 | 0.99999961 | 0.9759 | 0 | 0 | 0 | 1 Ref      |
| KT962246 | Unassigned | Unassigned | Unassigned | 1017_0 | Clustered           | 5 VC_1017_0  | 5   | 0.9759 | 0.99999961 | 0.9759 | 0 | 0 | 0 | 1 Ref      |
| KT962247 | Unassigned | Unassigned | Unassigned | 1017_0 | Clustered           | 5 VC_1017_0  | 5   | 0.9759 | 0.99999961 | 0.9759 | 0 | 0 | 0 | 1 Ref      |
| KT962832 | Unassigned | Unassigned | Unassigned | 637_0  | Clustered           | 115 VC_637_0 | 115 | 0.731  | 1          | 0.731  | 0 | 0 | 0 | 0.8764 Ref |
| KT964103 | Unassigned | Unassigned | Unassigned | 111_0  | Clustered           | 91 VC_111_0  | 91  | 0.9587 | 1          | 0.9587 | 0 | 0 | 0 | 1 Ref      |
| KT968831 | Unassigned | Unassigned | Unassigned | 176_3  | Clustered/Singleton | 1 VC_176_3   | 1   | 0      | 1          | 0      | 0 | 0 | 0 | 1 Ref      |
| KT968832 | Unassigned | Unassigned | Unassigned | 179_0  | Clustered           | 53 VC_179_0  | 53  | 0.9137 | 1          | 0.9137 | 0 | 0 | 0 | 1 Ref      |
| KT989433 | Unassigned | Unassigned | Unassigned | 975_0  | Clustered           | 11 VC_975_0  | 11  | 0.9687 | 1          | 0.9687 | 0 | 0 | 0 | 1 Ref      |
| KT990215 | Unassigned | Unassigned | Unassigned | 451_0  | Clustered           | 80 VC_451_0  | 80  | 0.9991 | 1          | 0.9991 | 0 | 0 | 0 | 1 Ref      |
| KT990218 | Unassigned | Unassigned | Unassigned | 956_0  | Clustered           | 39 VC_956_0  | 39  | 1      | 1          | 1      | 0 | 0 | 0 | 1 Ref      |
| KT995480 | Unassigned | Unassigned | Unassigned | 187_3  | Clustered           | 9 VC_187_3   | 9   | 0.1971 | 1          | 0.1971 | 0 | 0 | 0 | 0.8611 Ref |
| KT997847 | Unassigned | Unassigned | Unassigned | 481_0  | Clustered           | 8 VC_481_0   | 8   | 0.1348 | 1          | 0.1348 | 0 | 0 | 0 | 1 Ref      |
| KU052037 | Unassigned | Unassigned | Unassigned | 37_1   | Clustered           | 3 VC_37_1    | 3   | 0.0833 | 0.9484635  | 0.079  | 0 | 0 | 0 | 1 Ref      |
| KU052488 | Unassigned | Unassigned | Unassigned | 634_0  | Clustered           | 3 VC_634_0   | 3   | 0.2046 | 0.99837593 | 0.2043 | 0 | 0 | 0 | 1 Ref      |
| KU055616 | Unassigned | Unassigned | Unassigned | 517_1  | Clustered           | 108 VC_517_1 | 108 | 0.8483 | 1          | 0.8483 | 0 | 0 | 0 | 0.9955 Ref |
| KU057941 | Unassigned | Unassigned | Unassigned | 733_0  | Clustered           | 5 VC_733_0   | 5   | 0.5111 | 0.99999994 | 0.5111 | 0 | 0 | 0 | 1 Ref      |
| KU064779 | Unassigned | Unassigned | Unassigned | 129_0  | Clustered           | 43 VC_129_0  | 43  | 0.886  | 1          | 0.886  | 0 | 0 | 0 | 1 Ref      |
| KU130126 | Unassigned | Unassigned | Unassigned | 78_1   | Clustered           | 6 VC_78_1    | 6   | 0.1362 | 1          | 0.1362 | 0 | 0 | 0 | 1 Ref      |
| KU130127 | Unassigned | Unassigned | Unassigned | 78_1   | Clustered           | 6 VC_78_1    | 6   | 0.1362 | 1          | 0.1362 | 0 | 0 | 0 | 1 Ref      |
| KU130128 | Unassigned | Unassigned | Unassigned | 78_1   | Clustered           | 6 VC_78_1    | 6   | 0.1362 | 1          | 0.1362 | 0 | 0 | 0 | 1 Ref      |
| KU130129 | Unassigned | Unassigned | Unassigned | 78_1   | Clustered           | 6 VC_78_1    | 6   | 0.1362 | 1          | 0.1362 | 0 | 0 | 0 | 1 Ref      |
| KU130130 | Unassigned | Unassigned | Unassigned | 78_1   | Clustered           | 6 VC_78_1    | 6   | 0.1362 | 1          | 0.1362 | 0 | 0 | 0 | 1 Ref      |
| KU130131 | Unassigned | Unassigned | Unassigned | 78_1   | Clustered           | 6 VC_78_1    | 6   | 0.1362 | 1          | 0.1362 | 0 | 0 | 0 | 1 Ref      |
| KU160638 | Unassigned | Unassigned | Unassigned | 857_0  | Clustered           | 11 VC_857_0  | 11  | 0.9712 | 1          | 0.9712 | 0 | 0 | 0 | 1 Ref      |



|          |            |            |            |        |                     |              |     |        |            |        |   |   |   |            |
|----------|------------|------------|------------|--------|---------------------|--------------|-----|--------|------------|--------|---|---|---|------------|
| KU160639 | Unassigned | Unassigned | Unassigned | 857_0  | Clustered           | 11 VC_857_0  | 11  | 0.9712 | 1          | 0.9712 | 0 | 0 | 0 | 1 Ref      |
| KU160640 | Unassigned | Unassigned | Unassigned | 1160_0 | Clustered           | 73 VC_1160_0 | 73  | 0.9835 | 1          | 0.9835 | 0 | 0 | 0 | 1 Ref      |
| KU160641 | Unassigned | Unassigned | Unassigned | 1164_0 | Clustered           | 25 VC_1164_0 | 25  | 0.7312 | 1          | 0.7312 | 0 | 0 | 0 | 1 Ref      |
| KU160642 | Unassigned | Unassigned | Unassigned | 802_0  | Clustered           | 17 VC_802_0  | 17  | 0.8025 | 1          | 0.8025 | 0 | 0 | 0 | 1 Ref      |
| KU160643 | Unassigned | Unassigned | Unassigned | 1160_0 | Clustered           | 73 VC_1160_0 | 73  | 0.9835 | 1          | 0.9835 | 0 | 0 | 0 | 1 Ref      |
| KU160644 | Unassigned | Unassigned | Unassigned | 1166_0 | Clustered           | 20 VC_1166_0 | 20  | 0.99   | 1          | 0.99   | 0 | 0 | 0 | 1 Ref      |
| KU160645 | Unassigned | Unassigned | Unassigned | 1160_0 | Clustered           | 73 VC_1160_0 | 73  | 0.9835 | 1          | 0.9835 | 0 | 0 | 0 | 1 Ref      |
| KU160646 | Unassigned | Unassigned | Unassigned | 1164_0 | Clustered           | 25 VC_1164_0 | 25  | 0.7312 | 1          | 0.7312 | 0 | 0 | 0 | 1 Ref      |
| KU160647 | Unassigned | Unassigned | Unassigned | 857_0  | Clustered           | 11 VC_857_0  | 11  | 0.9712 | 1          | 0.9712 | 0 | 0 | 0 | 1 Ref      |
| KU160648 | Unassigned | Unassigned | Unassigned | 1160_0 | Clustered           | 73 VC_1160_0 | 73  | 0.9835 | 1          | 0.9835 | 0 | 0 | 0 | 1 Ref      |
| KU160649 | Unassigned | Unassigned | Unassigned | 1160_0 | Clustered           | 73 VC_1160_0 | 73  | 0.9835 | 1          | 0.9835 | 0 | 0 | 0 | 1 Ref      |
| KU160650 | Unassigned | Unassigned | Unassigned | 1167_0 | Clustered           | 6 VC_1167_0  | 6   | 0.8642 | 0.99999946 | 0.8642 | 0 | 0 | 0 | 1 Ref      |
| KU160651 | Unassigned | Unassigned | Unassigned | 1073_0 | Clustered           | 24 VC_1073_0 | 24  | 0.8388 | 1          | 0.8388 | 0 | 0 | 0 | 1 Ref      |
| KU160652 | Unassigned | Unassigned | Unassigned | 1160_0 | Clustered           | 73 VC_1160_0 | 73  | 0.9835 | 1          | 0.9835 | 0 | 0 | 0 | 1 Ref      |
| KU160653 | Unassigned | Unassigned | Unassigned | 1160_0 | Clustered           | 73 VC_1160_0 | 73  | 0.9835 | 1          | 0.9835 | 0 | 0 | 0 | 1 Ref      |
| KU160654 | Unassigned | Unassigned | Unassigned | 1169_0 | Clustered           | 7 VC_1169_0  | 7   | 0.9811 | 0.99995613 | 0.981  | 0 | 0 | 0 | 1 Ref      |
| KU160655 | Unassigned | Unassigned | Unassigned | 950_0  | Clustered           | 38 VC_950_0  | 38  | 0.9443 | 1          | 0.9443 | 0 | 0 | 0 | 1 Ref      |
| KU160656 | Unassigned | Unassigned | Unassigned | 1073_0 | Clustered           | 24 VC_1073_0 | 24  | 0.8388 | 1          | 0.8388 | 0 | 0 | 0 | 1 Ref      |
| KU160657 | Unassigned | Unassigned | Unassigned | 950_0  | Clustered           | 38 VC_950_0  | 38  | 0.9443 | 1          | 0.9443 | 0 | 0 | 0 | 1 Ref      |
| KU160658 | Unassigned | Unassigned | Unassigned | 950_0  | Clustered           | 38 VC_950_0  | 38  | 0.9443 | 1          | 0.9443 | 0 | 0 | 0 | 1 Ref      |
| KU160659 | Unassigned | Unassigned | Unassigned | 1160_0 | Clustered           | 73 VC_1160_0 | 73  | 0.9835 | 1          | 0.9835 | 0 | 0 | 0 | 1 Ref      |
| KU160660 | Unassigned | Unassigned | Unassigned | 1074_0 | Clustered           | 19 VC_1074_0 | 19  | 0.9198 | 1          | 0.9198 | 0 | 0 | 0 | 1 Ref      |
| KU160661 | Unassigned | Unassigned | Unassigned | 1160_0 | Clustered           | 73 VC_1160_0 | 73  | 0.9835 | 1          | 0.9835 | 0 | 0 | 0 | 1 Ref      |
| KU160662 | Unassigned | Unassigned | Unassigned | 1160_0 | Clustered           | 73 VC_1160_0 | 73  | 0.9835 | 1          | 0.9835 | 0 | 0 | 0 | 1 Ref      |
| KU160663 | Unassigned | Unassigned | Unassigned | 857_0  | Clustered           | 11 VC_857_0  | 11  | 0.9712 | 1          | 0.9712 | 0 | 0 | 0 | 1 Ref      |
| KU160664 | Unassigned | Unassigned | Unassigned | 1169_0 | Clustered           | 7 VC_1169_0  | 7   | 0.9811 | 0.99995613 | 0.981  | 0 | 0 | 0 | 1 Ref      |
| KU160665 | Unassigned | Unassigned | Unassigned | 1073_0 | Clustered           | 24 VC_1073_0 | 24  | 0.8388 | 1          | 0.8388 | 0 | 0 | 0 | 1 Ref      |
| KU160666 | Unassigned | Unassigned | Unassigned | 857_0  | Clustered           | 11 VC_857_0  | 11  | 0.9712 | 1          | 0.9712 | 0 | 0 | 0 | 1 Ref      |
| KU160667 | Unassigned | Unassigned | Unassigned | 950_0  | Clustered           | 38 VC_950_0  | 38  | 0.9443 | 1          | 0.9443 | 0 | 0 | 0 | 1 Ref      |
| KU160668 | Unassigned | Unassigned | Unassigned | 1073_0 | Clustered           | 24 VC_1073_0 | 24  | 0.8388 | 1          | 0.8388 | 0 | 0 | 0 | 1 Ref      |
| KU160669 | Unassigned | Unassigned | Unassigned | 1170_1 | Clustered           | 3 VC_1170_1  | 3   | 0.308  | 0.99836447 | 0.3075 | 0 | 0 | 0 | 1 Ref      |
| KU160670 | Unassigned | Unassigned | Unassigned | 950_0  | Clustered           | 38 VC_950_0  | 38  | 0.9443 | 1          | 0.9443 | 0 | 0 | 0 | 1 Ref      |
| KU160671 | Unassigned | Unassigned | Unassigned | 1160_0 | Clustered           | 73 VC_1160_0 | 73  | 0.9835 | 1          | 0.9835 | 0 | 0 | 0 | 1 Ref      |
| KU160672 | Unassigned | Unassigned | Unassigned | 1160_0 | Clustered           | 73 VC_1160_0 | 73  | 0.9835 | 1          | 0.9835 | 0 | 0 | 0 | 1 Ref      |
| KU160673 | Unassigned | Unassigned | Unassigned | 1170_1 | Clustered           | 3 VC_1170_1  | 3   | 0.308  | 0.99836447 | 0.3075 | 0 | 0 | 0 | 1 Ref      |
| KU160674 | Unassigned | Unassigned | Unassigned | 950_0  | Clustered           | 38 VC_950_0  | 38  | 0.9443 | 1          | 0.9443 | 0 | 0 | 0 | 1 Ref      |
| KU183006 | Unassigned | Unassigned | Unassigned | 823_0  | Clustered           | 124 VC_823_0 | 124 | 0.9492 | 1          | 0.9492 | 0 | 0 | 0 | 1 Ref      |
| KU189325 | Unassigned | Unassigned | Unassigned | 975_0  | Clustered           | 11 VC_975_0  | 11  | 0.9687 | 1          | 0.9687 | 0 | 0 | 0 | 1 Ref      |
| KU194205 | Unassigned | Unassigned | Unassigned | 575_0  | Clustered           | 35 VC_575_0  | 35  | 0.8815 | 1          | 0.8815 | 0 | 0 | 0 | 1 Ref      |
| KU194206 | Unassigned | Unassigned | Unassigned | 575_0  | Clustered           | 35 VC_575_0  | 35  | 0.8815 | 1          | 0.8815 | 0 | 0 | 0 | 1 Ref      |
| KU197013 | Unassigned | Unassigned | Unassigned | 74_0   | Clustered           | 15 VC_74_0   | 15  | 0.5204 | 1          | 0.5204 | 0 | 0 | 0 | 1 Ref      |
| KU197014 | Unassigned | Unassigned | Unassigned | 749_0  | Clustered           | 40 VC_749_0  | 40  | 0.7517 | 1          | 0.7517 | 0 | 0 | 0 | 1 Ref      |
| KU198331 | Unassigned | Unassigned | Unassigned | 79_7   | Clustered           | 33 VC_79_7   | 33  | 0.216  | 1          | 0.216  | 0 | 0 | 0 | 0.8409 Ref |
| KU199707 | Unassigned | Unassigned | Unassigned | 179_0  | Clustered           | 53 VC_179_0  | 53  | 0.9137 | 1          | 0.9137 | 0 | 0 | 0 | 1 Ref      |
| KU199708 | Unassigned | Unassigned | Unassigned | 179_0  | Clustered           | 53 VC_179_0  | 53  | 0.9137 | 1          | 0.9137 | 0 | 0 | 0 | 1 Ref      |
| KU199709 | Unassigned | Unassigned | Unassigned | 179_0  | Clustered           | 53 VC_179_0  | 53  | 0.9137 | 1          | 0.9137 | 0 | 0 | 0 | 1 Ref      |
| KU199710 | Unassigned | Unassigned | Unassigned | 297_0  | Clustered           | 5 VC_297_0   | 5   | 0.1056 | 0.99999993 | 0.1056 | 0 | 0 | 0 | 0.9 Ref    |
| KU204984 | Unassigned | Unassigned | Unassigned | 169_0  | Clustered           | 20 VC_169_0  | 20  | 0.7529 | 1          | 0.7529 | 0 | 0 | 0 | 1 Ref      |
| KU230356 | Unassigned | Unassigned | Unassigned | 1173_0 | Clustered           | 6 VC_1173_0  | 6   | 0.9951 | 0.99999296 | 0.9951 | 0 | 0 | 0 | 1 Ref      |
| KU234099 | Unassigned | Unassigned | Unassigned | 888_0  | Clustered           | 28 VC_888_0  | 28  | 0.5497 | 1          | 0.5497 | 0 | 0 | 0 | 1 Ref      |
| KU234532 | Unassigned | Unassigned | Unassigned | 1174_0 | Clustered           | 4 VC_1174_0  | 4   | 1      | 1          | 1      | 0 | 0 | 0 | 1 Ref      |
| KU234533 | Unassigned | Unassigned | Unassigned | 1174_0 | Clustered           | 4 VC_1174_0  | 4   | 1      | 1          | 1      | 0 | 0 | 0 | 1 Ref      |
| KU238068 | Unassigned | Unassigned | Unassigned | 39_0   | Clustered           | 35 VC_39_0   | 35  | 0.4337 | 1          | 0.4337 | 0 | 0 | 0 | 1 Ref      |
| KU238069 | Unassigned | Unassigned | Unassigned | 39_0   | Clustered           | 35 VC_39_0   | 35  | 0.4337 | 1          | 0.4337 | 0 | 0 | 0 | 1 Ref      |
| KU238070 | Unassigned | Unassigned | Unassigned | 39_0   | Clustered           | 35 VC_39_0   | 35  | 0.4337 | 1          | 0.4337 | 0 | 0 | 0 | 1 Ref      |
| KU245542 | Unassigned | Unassigned | Unassigned | 1028_0 | Clustered           | 8 VC_1028_0  | 8   | 0.9323 | 1          | 0.9323 | 0 | 0 | 0 | 1 Ref      |
| KU253712 | Unassigned | Unassigned | Unassigned | 85_8   | Clustered/Singleton | 1 VC_85_8    | 1   | 0      | 1          | 0      | 0 | 0 | 0 | 1 Ref      |
| KU255188 | Unassigned | Unassigned | Unassigned | 514_0  | Clustered           | 75 VC_514_0  | 75  | 0.9402 | 1          | 0.9402 | 0 | 0 | 0 | 1 Ref      |
| KU255730 | Unassigned | Unassigned | Unassigned | 286_8  | Clustered/Singleton | 1 VC_286_8   | 1   | 0      | 1          | 0      | 0 | 0 | 0 | 1 Ref      |
| KU297675 | Unassigned | Unassigned | Unassigned | 76_0   | Clustered           | 37 VC_76_0   | 37  | 0.9403 | 1          | 0.9403 | 0 | 0 | 0 | 1 Ref      |
| KU297783 | Unassigned | Unassigned | Unassigned | 216_4  | Clustered           | 13 VC_216_4  | 13  | 0.1657 | 1          | 0.1657 | 0 | 0 | 0 | 1 Ref      |
| KU298437 | Unassigned | Unassigned | Unassigned | 42_0   | Clustered           | 49 VC_42_0   | 49  | 0.4517 | 1          | 0.4517 | 0 | 0 | 0 | 0.8597 Ref |
| KU310943 | Unassigned | Unassigned | Unassigned | 297_1  | Clustered           | 20 VC_297_1  | 20  | 0.5653 | 1          | 0.5653 | 0 | 0 | 0 | 0.7684 Ref |
| KU356689 | Unassigned | Unassigned | Unassigned | 464_0  | Clustered           | 8 VC_464_0   | 8   | 0.2629 | 1          | 0.2629 | 0 | 0 | 0 | 1 Ref      |
| KU356690 | Unassigned | Unassigned | Unassigned | 781_0  | Clustered           | 2 VC_781_0   | 2   | 0.0375 | 0.95691208 | 0.0359 | 0 | 0 | 0 | 1 Ref      |
| KU356691 | Unassigned | Unassigned | Unassigned | 781_0  | Clustered           | 2 VC_781_0   | 2   | 0.0375 | 0.95691208 | 0.0359 | 0 | 0 | 0 | 1 Ref      |
| KU497559 | Unassigned | Unassigned | Unassigned | 76_0   | Clustered           | 37 VC_76_0   | 37  | 0.9403 | 1          | 0.9403 | 0 | 0 | 0 | 1 Ref      |
| KU504502 | Unassigned | Unassigned | Unassigned | 5_0    | Clustered           | 30 VC_5_0    | 30  | 0.9647 | 1          | 0.9647 | 0 | 0 | 0 | 1 Ref      |
| KU510289 | Unassigned | Unassigned | Unassigned | 698_0  | Clustered           | 26 VC_698_0  | 26  | 0.9366 | 1          | 0.9366 | 0 | 0 | 0 | 1 Ref      |
| KU517658 | Unassigned | Unassigned | Unassigned | 734_0  | Clustered           | 6 VC_734_0   | 6   | 0.1914 | 0.99996888 | 0.1914 | 0 | 0 | 0 | 1 Ref      |
| KU521356 | Unassigned | Unassigned | Unassigned | 344_0  | Clustered           | 21 VC_344_0  | 21  | 0.5436 | 1          | 0.5436 | 0 | 0 | 0 | 1 Ref      |
| KU522583 | Unassigned | Unassigned | Unassigned | 848_0  | Clustered           | 28 VC_848_0  | 28  | 0.7927 | 1          | 0.7927 | 0 | 0 | 0 | 1 Ref      |
| KU530220 | Unassigned | Unassigned | Unassigned | 975_0  | Clustered           | 11 VC_975_0  | 11  | 0.9687 | 1          | 0.9687 | 0 | 0 | 0 | 1 Ref      |
| KU535860 | Unassigned | Unassigned | Unassigned | 755_0  | Clustered           | 9 VC_755_0   | 9   | 0.4489 | 1          | 0.4489 | 0 | 0 | 0 | 1 Ref      |
| KU568494 | Unassigned | Unassigned | Unassigned | 217_0  | Clustered           | 5 VC_217_0   | 5   | 0.069  | 0.99999998 | 0.069  | 0 | 0 | 0 | 1 Ref      |
| KU574722 | Unassigned | Unassigned | Unassigned | 164_5  | Clustered/Singleton | 1 VC_164_5   | 1   | 0      | 1          | 0      | 0 | 0 | 0 | 1 Ref      |
| KU577463 | Unassigned | Unassigned | Unassigned | 187_3  | Clustered           | 9 VC_187_3   | 9   | 0.1971 | 1          | 0.1971 | 0 | 0 | 0 | 0.8611 Ref |
| KU578077 | Unassigned | Unassigned | Unassigned | 514_0  | Clustered           | 75 VC_514_0  | 75  | 0.9402 | 1          | 0.9402 | 0 | 0 | 0 | 1 Ref      |
| KU594606 | Unassigned | Unassigned | Unassigned | 433_6  | Clustered/Singleton | 1 VC_433_6   | 1   | 0      | 1          | 0      | 0 | 0 | 0 | 1 Ref      |
| KU594607 | Unassigned | Unassigned | Unassigned | 433_4  | Clustered           | 9 VC_433_4   | 9   | 0.1285 | 1          | 0.1285 | 0 | 0 | 0 | 1 Ref      |
| KU595432 | Unassigned | Unassigned | Unassigned | 74_0   | Clustered           | 15 VC_74_0   | 15  | 0.5204 | 1          | 0.5204 | 0 | 0 | 0 | 1 Ref      |



|          |            |            |            |        |                     |              |     |        |            |        |   |   |   |            |
|----------|------------|------------|------------|--------|---------------------|--------------|-----|--------|------------|--------|---|---|---|------------|
| KU595433 | Unassigned | Unassigned | Unassigned | 74_0   | Clustered           | 15 VC_74_0   | 15  | 0.5204 | 1          | 0.5204 | 0 | 0 | 0 | 1 Ref      |
| KU595434 | Unassigned | Unassigned | Unassigned | 637_0  | Clustered           | 115 VC_637_0 | 115 | 0.731  | 1          | 0.731  | 0 | 0 | 0 | 0.8764 Ref |
| KU598877 | Unassigned | Unassigned | Unassigned | 1157_0 | Clustered           | 24 VC_1157_0 | 24  | 1      | 1          | 1      | 0 | 0 | 0 | 1 Ref      |
| KU598878 | Unassigned | Unassigned | Unassigned | 1157_0 | Clustered           | 24 VC_1157_0 | 24  | 1      | 1          | 1      | 0 | 0 | 0 | 1 Ref      |
| KU598879 | Unassigned | Unassigned | Unassigned | 1157_0 | Clustered           | 24 VC_1157_0 | 24  | 1      | 1          | 1      | 0 | 0 | 0 | 1 Ref      |
| KU598880 | Unassigned | Unassigned | Unassigned | 1040_0 | Clustered           | 23 VC_1040_0 | 23  | 0.9605 | 1          | 0.9605 | 0 | 0 | 0 | 1 Ref      |
| KU598881 | Unassigned | Unassigned | Unassigned | 1040_0 | Clustered           | 23 VC_1040_0 | 23  | 0.9605 | 1          | 0.9605 | 0 | 0 | 0 | 1 Ref      |
| KU598882 | Unassigned | Unassigned | Unassigned | 1040_0 | Clustered           | 23 VC_1040_0 | 23  | 0.9605 | 1          | 0.9605 | 0 | 0 | 0 | 1 Ref      |
| KU598883 | Unassigned | Unassigned | Unassigned | 1040_0 | Clustered           | 23 VC_1040_0 | 23  | 0.9605 | 1          | 0.9605 | 0 | 0 | 0 | 1 Ref      |
| KU598884 | Unassigned | Unassigned | Unassigned | 1040_0 | Clustered           | 23 VC_1040_0 | 23  | 0.9605 | 1          | 0.9605 | 0 | 0 | 0 | 1 Ref      |
| KU598885 | Unassigned | Unassigned | Unassigned | 1040_0 | Clustered           | 23 VC_1040_0 | 23  | 0.9605 | 1          | 0.9605 | 0 | 0 | 0 | 1 Ref      |
| KU598886 | Unassigned | Unassigned | Unassigned | 1157_0 | Clustered           | 24 VC_1157_0 | 24  | 1      | 1          | 1      | 0 | 0 | 0 | 1 Ref      |
| KU598887 | Unassigned | Unassigned | Unassigned | 1023_0 | Clustered           | 8 VC_1023_0  | 8   | 0.8574 | 1          | 0.8574 | 0 | 0 | 0 | 1 Ref      |
| KU598888 | Unassigned | Unassigned | Unassigned | 1023_0 | Clustered           | 8 VC_1023_0  | 8   | 0.8574 | 1          | 0.8574 | 0 | 0 | 0 | 1 Ref      |
| KU598889 | Unassigned | Unassigned | Unassigned | 1023_0 | Clustered           | 8 VC_1023_0  | 8   | 0.8574 | 1          | 0.8574 | 0 | 0 | 0 | 1 Ref      |
| KU613353 | Unassigned | Unassigned | Unassigned | 225_0  | Clustered           | 32 VC_225_0  | 32  | 0.848  | 1          | 0.848  | 0 | 0 | 0 | 0.996 Ref  |
| KU640380 | Unassigned | Unassigned | Unassigned | 85_13  | Clustered/Singleton | 1 VC_85_13   | 1   | 0      | 1          | 0      | 0 | 0 | 0 | 1 Ref      |
| KU647626 | Unassigned | Unassigned | Unassigned | 1179_0 | Clustered           | 3 VC_1179_0  | 3   | 0.7588 | 0.96819872 | 0.7347 | 0 | 0 | 0 | 1 Ref      |
| KU647627 | Unassigned | Unassigned | Unassigned | 1179_0 | Clustered           | 3 VC_1179_0  | 3   | 0.7588 | 0.96819872 | 0.7347 | 0 | 0 | 0 | 1 Ref      |
| KU647628 | Unassigned | Unassigned | Unassigned | 802_0  | Clustered           | 17 VC_802_0  | 17  | 0.8025 | 1          | 0.8025 | 0 | 0 | 0 | 1 Ref      |
| KU647629 | Unassigned | Unassigned | Unassigned | 1073_0 | Clustered           | 24 VC_1073_0 | 24  | 0.8388 | 1          | 0.8388 | 0 | 0 | 0 | 1 Ref      |
| KU666550 | Unassigned | Unassigned | Unassigned | 111_0  | Clustered           | 91 VC_111_0  | 91  | 0.9587 | 1          | 0.9587 | 0 | 0 | 0 | 1 Ref      |
| KU678389 | Unassigned | Unassigned | Unassigned | 256_0  | Clustered           | 14 VC_256_0  | 14  | 0.2368 | 1          | 0.2368 | 0 | 0 | 0 | 1 Ref      |
| KU678390 | Unassigned | Unassigned | Unassigned | 256_0  | Clustered           | 14 VC_256_0  | 14  | 0.2368 | 1          | 0.2368 | 0 | 0 | 0 | 1 Ref      |
| KU678391 | Unassigned | Unassigned | Unassigned | 256_0  | Clustered           | 14 VC_256_0  | 14  | 0.2368 | 1          | 0.2368 | 0 | 0 | 0 | 1 Ref      |
| KU678392 | Unassigned | Unassigned | Unassigned | 256_0  | Clustered           | 14 VC_256_0  | 14  | 0.2368 | 1          | 0.2368 | 0 | 0 | 0 | 1 Ref      |
| KU686192 | Unassigned | Unassigned | Unassigned | 433_0  | Clustered           | 6 VC_433_0   | 6   | 0.0787 | 1          | 0.0787 | 0 | 0 | 0 | 1 Ref      |
| KU686193 | Unassigned | Unassigned | Unassigned | 433_0  | Clustered           | 6 VC_433_0   | 6   | 0.0787 | 1          | 0.0787 | 0 | 0 | 0 | 1 Ref      |
| KU686194 | Unassigned | Unassigned | Unassigned | 433_0  | Clustered           | 6 VC_433_0   | 6   | 0.0787 | 1          | 0.0787 | 0 | 0 | 0 | 1 Ref      |
| KU686195 | Unassigned | Unassigned | Unassigned | 433_0  | Clustered           | 6 VC_433_0   | 6   | 0.0787 | 1          | 0.0787 | 0 | 0 | 0 | 1 Ref      |
| KU686196 | Unassigned | Unassigned | Unassigned | 433_0  | Clustered           | 6 VC_433_0   | 6   | 0.0787 | 1          | 0.0787 | 0 | 0 | 0 | 1 Ref      |
| KU686197 | Unassigned | Unassigned | Unassigned | 433_3  | Clustered           | 3 VC_433_3   | 3   | 0.0292 | 0.9981281  | 0.0292 | 0 | 0 | 0 | 1 Ref      |
| KU686198 | Unassigned | Unassigned | Unassigned | 433_3  | Clustered           | 3 VC_433_3   | 3   | 0.0292 | 0.9981281  | 0.0292 | 0 | 0 | 0 | 1 Ref      |
| KU686199 | Unassigned | Unassigned | Unassigned | 433_3  | Clustered           | 3 VC_433_3   | 3   | 0.0292 | 0.9981281  | 0.0292 | 0 | 0 | 0 | 1 Ref      |
| KU686200 | Unassigned | Unassigned | Unassigned | 433_1  | Clustered           | 9 VC_433_1   | 9   | 0.1288 | 1          | 0.1288 | 0 | 0 | 0 | 0.8611 Ref |
| KU686201 | Unassigned | Unassigned | Unassigned | 433_1  | Clustered           | 9 VC_433_1   | 9   | 0.1288 | 1          | 0.1288 | 0 | 0 | 0 | 0.8611 Ref |
| KU686202 | Unassigned | Unassigned | Unassigned | 433_1  | Clustered           | 9 VC_433_1   | 9   | 0.1288 | 1          | 0.1288 | 0 | 0 | 0 | 0.8611 Ref |
| KU686204 | Unassigned | Unassigned | Unassigned | 432_15 | Clustered           | 3 VC_432_15  | 3   | 0.0418 | 0.99855682 | 0.0417 | 0 | 0 | 0 | 1 Ref      |
| KU686205 | Unassigned | Unassigned | Unassigned | 432_15 | Clustered           | 3 VC_432_15  | 3   | 0.0418 | 0.99855682 | 0.0417 | 0 | 0 | 0 | 1 Ref      |
| KU686206 | Unassigned | Unassigned | Unassigned | 432_15 | Clustered           | 3 VC_432_15  | 3   | 0.0418 | 0.99855682 | 0.0417 | 0 | 0 | 0 | 1 Ref      |
| KU686207 | Unassigned | Unassigned | Unassigned | 655_5  | Clustered           | 3 VC_655_5   | 3   | 0.0166 | 0.9986063  | 0.0165 | 0 | 0 | 0 | 1 Ref      |
| KU686208 | Unassigned | Unassigned | Unassigned | 655_5  | Clustered           | 3 VC_655_5   | 3   | 0.0166 | 0.9986063  | 0.0165 | 0 | 0 | 0 | 1 Ref      |
| KU686209 | Unassigned | Unassigned | Unassigned | 655_5  | Clustered           | 3 VC_655_5   | 3   | 0.0166 | 0.9986063  | 0.0165 | 0 | 0 | 0 | 1 Ref      |
| KU686211 | Unassigned | Unassigned | Unassigned | 433_10 | Clustered/Singleton | 1 VC_433_10  | 1   | 0      | 1          | 0      | 0 | 0 | 0 | 1 Ref      |
| KU686212 | Unassigned | Unassigned | Unassigned | 657_0  | Clustered           | 3 VC_657_0   | 3   | 0.0217 | 0.92528126 | 0.0201 | 0 | 0 | 0 | 1 Ref      |
| KU686213 | Unassigned | Unassigned | Unassigned | 657_0  | Clustered           | 3 VC_657_0   | 3   | 0.0217 | 0.92528126 | 0.0201 | 0 | 0 | 0 | 1 Ref      |
| KU687347 | Unassigned | Unassigned | Unassigned | 385_0  | Clustered           | 51 VC_385_0  | 51  | 0.8754 | 1          | 0.8754 | 0 | 0 | 0 | 1 Ref      |
| KU687348 | Unassigned | Unassigned | Unassigned | 385_0  | Clustered           | 51 VC_385_0  | 51  | 0.8754 | 1          | 0.8754 | 0 | 0 | 0 | 1 Ref      |
| KU687349 | Unassigned | Unassigned | Unassigned | 451_0  | Clustered           | 80 VC_451_0  | 80  | 0.9991 | 1          | 0.9991 | 0 | 0 | 0 | 1 Ref      |
| KU687350 | Unassigned | Unassigned | Unassigned | 451_0  | Clustered           | 80 VC_451_0  | 80  | 0.9991 | 1          | 0.9991 | 0 | 0 | 0 | 1 Ref      |
| KU687351 | Unassigned | Unassigned | Unassigned | 451_0  | Clustered           | 80 VC_451_0  | 80  | 0.9991 | 1          | 0.9991 | 0 | 0 | 0 | 1 Ref      |
| KU695581 | Unassigned | Unassigned | Unassigned | 221_0  | Clustered           | 22 VC_221_0  | 22  | 0.7447 | 1          | 0.7447 | 0 | 0 | 0 | 1 Ref      |
| KU695582 | Unassigned | Unassigned | Unassigned | 223_0  | Clustered           | 38 VC_223_0  | 38  | 0.9095 | 1          | 0.9095 | 0 | 0 | 0 | 1 Ref      |
| KU708004 | Unassigned | Unassigned | Unassigned | 298_0  | Clustered/Singleton | 1 VC_298_0   | 1   | 0      | 1          | 0      | 0 | 0 | 0 | 1 Ref      |
| KU716094 | Unassigned | Unassigned | Unassigned | 225_0  | Clustered           | 32 VC_225_0  | 32  | 0.848  | 1          | 0.848  | 0 | 0 | 0 | 0.996 Ref  |
| KU716095 | Unassigned | Unassigned | Unassigned | 225_0  | Clustered           | 32 VC_225_0  | 32  | 0.848  | 1          | 0.848  | 0 | 0 | 0 | 0.996 Ref  |
| KU726251 | Unassigned | Unassigned | Unassigned | 959_5  | Clustered           | 19 VC_959_5  | 19  | 0.2626 | 1          | 0.2626 | 0 | 0 | 0 | 1 Ref      |
| KU728633 | Unassigned | Unassigned | Unassigned | 686_1  | Clustered           | 2 VC_686_1   | 2   | 0.2204 | 0.91327915 | 0.2013 | 0 | 0 | 0 | 1 Ref      |
| KU737344 | Unassigned | Unassigned | Unassigned | 884_0  | Clustered           | 28 VC_884_0  | 28  | 0.6211 | 1          | 0.6211 | 0 | 0 | 0 | 0.9841 Ref |
| KU737345 | Unassigned | Unassigned | Unassigned | 883_1  | Clustered           | 12 VC_883_1  | 12  | 0.2441 | 1          | 0.2441 | 0 | 0 | 0 | 1 Ref      |
| KU737346 | Unassigned | Unassigned | Unassigned | 883_0  | Clustered           | 10 VC_883_0  | 10  | 0.2015 | 1          | 0.2015 | 0 | 0 | 0 | 1 Ref      |
| KU737347 | Unassigned | Unassigned | Unassigned | 883_1  | Clustered           | 12 VC_883_1  | 12  | 0.2441 | 1          | 0.2441 | 0 | 0 | 0 | 1 Ref      |
| KU737348 | Unassigned | Unassigned | Unassigned | 884_0  | Clustered           | 28 VC_884_0  | 28  | 0.6211 | 1          | 0.6211 | 0 | 0 | 0 | 0.9841 Ref |
| KU737349 | Unassigned | Unassigned | Unassigned | 884_0  | Clustered           | 28 VC_884_0  | 28  | 0.6211 | 1          | 0.6211 | 0 | 0 | 0 | 0.9841 Ref |
| KU737350 | Unassigned | Unassigned | Unassigned | 884_0  | Clustered           | 28 VC_884_0  | 28  | 0.6211 | 1          | 0.6211 | 0 | 0 | 0 | 0.9841 Ref |
| KU737351 | Unassigned | Unassigned | Unassigned | 884_0  | Clustered           | 28 VC_884_0  | 28  | 0.6211 | 1          | 0.6211 | 0 | 0 | 0 | 0.9841 Ref |
| KU737352 | Unassigned | Unassigned | Unassigned | 884_0  | Clustered           | 28 VC_884_0  | 28  | 0.6211 | 1          | 0.6211 | 0 | 0 | 0 | 0.9841 Ref |
| KU743887 | Unassigned | Unassigned | Unassigned | 423_0  | Clustered           | 45 VC_423_0  | 45  | 0.9484 | 1          | 0.9484 | 0 | 0 | 0 | 1 Ref      |
| KU747973 | Unassigned | Unassigned | Unassigned | 644_0  | Clustered           | 5 VC_644_0   | 5   | 0.6649 | 0.99999975 | 0.6649 | 0 | 0 | 0 | 1 Ref      |
| KU760857 | Unassigned | Unassigned | Unassigned | 247_0  | Clustered           | 14 VC_247_0  | 14  | 0.9119 | 1          | 0.9119 | 0 | 0 | 0 | 0.967 Ref  |
| KU761558 | Unassigned | Unassigned | Unassigned | 216_3  | Clustered           | 8 VC_216_3   | 8   | 0.0701 | 1          | 0.0701 | 0 | 0 | 0 | 0.8571 Ref |
| KU761559 | Unassigned | Unassigned | Unassigned | 216_3  | Clustered           | 8 VC_216_3   | 8   | 0.0701 | 1          | 0.0701 | 0 | 0 | 0 | 0.8571 Ref |
| KU761955 | Unassigned | Unassigned | Unassigned | 76_0   | Clustered           | 37 VC_76_0   | 37  | 0.9403 | 1          | 0.9403 | 0 | 0 | 0 | 1 Ref      |
| KU831549 | Unassigned | Unassigned | Unassigned | 817_0  | Clustered           | 14 VC_817_0  | 14  | 0.6342 | 1          | 0.6342 | 0 | 0 | 0 | 1 Ref      |
| KU836751 | Unassigned | Unassigned | Unassigned | 100_0  | Clustered           | 15 VC_100_0  | 15  | 0.6536 | 1          | 0.6536 | 0 | 0 | 0 | 1 Ref      |
| KU847400 | Unassigned | Unassigned | Unassigned | 884_1  | Clustered           | 8 VC_884_1   | 8   | 0.1102 | 0.9989323  | 0.1101 | 0 | 0 | 0 | 0.75 Ref   |
| KU848187 | Unassigned | Unassigned | Unassigned | 377_0  | Clustered           | 3 VC_377_0   | 3   | 0.3906 | 0.99785056 | 0.3898 | 0 | 0 | 0 | 1 Ref      |
| KU862660 | Unassigned | Unassigned | Unassigned | 957_1  | Clustered/Singleton | 1 VC_957_1   | 1   | 0      | 1          | 0      | 0 | 0 | 0 | 1 Ref      |
| KU865302 | Unassigned | Unassigned | Unassigned | 520_40 | Clustered           | 4 VC_520_40  | 4   | 0.0396 | 0.99998776 | 0.0396 | 0 | 0 | 0 | 1 Ref      |
| KU865303 | Unassigned | Unassigned | Unassigned | 551_2  | Clustered           | 17 VC_551_2  | 17  | 0.0973 | 1          | 0.0973 | 0 | 0 | 0 | 0.9779 Ref |
| KU867876 | Unassigned | Unassigned | Unassigned | 283_25 | Clustered/Singleton | 1 VC_283_25  | 1   | 0      | 1          | 0      | 0 | 0 | 0 | 1 Ref      |



|          |            |            |            |        |                     |              |     |        |            |        |   |   |   |        |     |
|----------|------------|------------|------------|--------|---------------------|--------------|-----|--------|------------|--------|---|---|---|--------|-----|
| KU867906 | Unassigned | Unassigned | Unassigned | 517_1  | Clustered           | 108 VC_517_1 | 108 | 0.8483 | 1          | 0.8483 | 0 | 0 | 0 | 0.9955 | Ref |
| KU867907 | Unassigned | Unassigned | Unassigned | 371_15 | Clustered           | 44 VC_371_15 | 44  | 0.1391 | 1          | 0.1391 | 0 | 0 | 0 | 0.7474 | Ref |
| KU878088 | Unassigned | Unassigned | Unassigned | 448_0  | Clustered           | 4 VC_448_0   | 4   | 0.3059 | 0.99978853 | 0.3058 | 0 | 0 | 0 | 1      | Ref |
| KU878967 | Unassigned | Unassigned | Unassigned | 28_1   | Clustered           | 53 VC_28_1   | 53  | 0.7164 | 1          | 0.7164 | 0 | 0 | 0 | 0.9325 | Ref |
| KU878968 | Unassigned | Unassigned | Unassigned | 290_5  | Clustered           | 14 VC_290_5  | 14  | 0.1422 | 1          | 0.1422 | 0 | 0 | 0 | 0.9231 | Ref |
| KU878969 | Unassigned | Unassigned | Unassigned | 290_5  | Clustered           | 14 VC_290_5  | 14  | 0.1422 | 1          | 0.1422 | 0 | 0 | 0 | 0.9231 | Ref |
| KU884561 | Unassigned | Unassigned | Unassigned | 612_0  | Clustered           | 9 VC_612_0   | 9   | 0.9545 | 1          | 0.9545 | 0 | 0 | 0 | 1      | Ref |
| KU884562 | Unassigned | Unassigned | Unassigned | 612_0  | Clustered           | 9 VC_612_0   | 9   | 0.9545 | 1          | 0.9545 | 0 | 0 | 0 | 1      | Ref |
| KU884563 | Unassigned | Unassigned | Unassigned | 612_0  | Clustered           | 9 VC_612_0   | 9   | 0.9545 | 1          | 0.9545 | 0 | 0 | 0 | 1      | Ref |
| KU884564 | Unassigned | Unassigned | Unassigned | 612_0  | Clustered           | 9 VC_612_0   | 9   | 0.9545 | 1          | 0.9545 | 0 | 0 | 0 | 1      | Ref |
| KU884565 | Unassigned | Unassigned | Unassigned | 612_0  | Clustered           | 9 VC_612_0   | 9   | 0.9545 | 1          | 0.9545 | 0 | 0 | 0 | 1      | Ref |
| KU885988 | Unassigned | Unassigned | Unassigned | 833_0  | Clustered           | 16 VC_833_0  | 16  | 0.9351 | 1          | 0.9351 | 0 | 0 | 0 | 1      | Ref |
| KU885989 | Unassigned | Unassigned | Unassigned | 833_0  | Clustered           | 16 VC_833_0  | 16  | 0.9351 | 1          | 0.9351 | 0 | 0 | 0 | 1      | Ref |
| KU885990 | Unassigned | Unassigned | Unassigned | 833_0  | Clustered           | 16 VC_833_0  | 16  | 0.9351 | 1          | 0.9351 | 0 | 0 | 0 | 1      | Ref |
| KU886222 | Unassigned | Unassigned | Unassigned | 489_1  | Clustered           | 11 VC_489_1  | 11  | 0.4621 | 1          | 0.4621 | 0 | 0 | 0 | 1      | Ref |
| KU886223 | Unassigned | Unassigned | Unassigned | 489_1  | Clustered           | 11 VC_489_1  | 11  | 0.4621 | 1          | 0.4621 | 0 | 0 | 0 | 1      | Ref |
| KU886224 | Unassigned | Unassigned | Unassigned | 489_1  | Clustered           | 11 VC_489_1  | 11  | 0.4621 | 1          | 0.4621 | 0 | 0 | 0 | 1      | Ref |
| KU886225 | Unassigned | Unassigned | Unassigned | 489_1  | Clustered           | 11 VC_489_1  | 11  | 0.4621 | 1          | 0.4621 | 0 | 0 | 0 | 1      | Ref |
| KU925172 | Unassigned | Unassigned | Unassigned | 283_8  | Clustered/Singleton | 1 VC_283_8   | 1   | 0      | 1          | 0      | 0 | 0 | 0 | 1      | Ref |
| KU927491 | Unassigned | Unassigned | Unassigned | 28_1   | Clustered           | 53 VC_28_1   | 53  | 0.7164 | 1          | 0.7164 | 0 | 0 | 0 | 0.9325 | Ref |
| KU927492 | Unassigned | Unassigned | Unassigned | 28_1   | Clustered           | 53 VC_28_1   | 53  | 0.7164 | 1          | 0.7164 | 0 | 0 | 0 | 0.9325 | Ref |
| KU927493 | Unassigned | Unassigned | Unassigned | 45_0   | Clustered           | 12 VC_45_0   | 12  | 0.35   | 1          | 0.35   | 0 | 0 | 0 | 1      | Ref |
| KU927494 | Unassigned | Unassigned | Unassigned | 28_1   | Clustered           | 53 VC_28_1   | 53  | 0.7164 | 1          | 0.7164 | 0 | 0 | 0 | 0.9325 | Ref |
| KU927495 | Unassigned | Unassigned | Unassigned | 28_1   | Clustered           | 53 VC_28_1   | 53  | 0.7164 | 1          | 0.7164 | 0 | 0 | 0 | 0.9325 | Ref |
| KU927496 | Unassigned | Unassigned | Unassigned | 28_1   | Clustered           | 53 VC_28_1   | 53  | 0.7164 | 1          | 0.7164 | 0 | 0 | 0 | 0.9325 | Ref |
| KU927497 | Unassigned | Unassigned | Unassigned | 191_19 | Clustered           | 12 VC_191_19 | 12  | 0.0655 | 1          | 0.0655 | 0 | 0 | 0 | 0.8636 | Ref |
| KU927498 | Unassigned | Unassigned | Unassigned | 28_1   | Clustered           | 53 VC_28_1   | 53  | 0.7164 | 1          | 0.7164 | 0 | 0 | 0 | 0.9325 | Ref |
| KU927499 | Unassigned | Unassigned | Unassigned | 392_0  | Clustered           | 126 VC_392_0 | 126 | 0.9621 | 1          | 0.9621 | 0 | 0 | 0 | 1      | Ref |
| KU927500 | Unassigned | Unassigned | Unassigned | 592_0  | Clustered           | 50 VC_592_0  | 50  | 0.7314 | 1          | 0.7314 | 0 | 0 | 0 | 1      | Ref |
| KU935726 | Unassigned | Unassigned | Unassigned | 521_0  | Clustered           | 37 VC_521_0  | 37  | 0.912  | 1          | 0.912  | 0 | 0 | 0 | 1      | Ref |
| KU935727 | Unassigned | Unassigned | Unassigned | 521_0  | Clustered           | 37 VC_521_0  | 37  | 0.912  | 1          | 0.912  | 0 | 0 | 0 | 1      | Ref |
| KU935728 | Unassigned | Unassigned | Unassigned | 521_0  | Clustered           | 37 VC_521_0  | 37  | 0.912  | 1          | 0.912  | 0 | 0 | 0 | 1      | Ref |
| KU935729 | Unassigned | Unassigned | Unassigned | 521_0  | Clustered           | 37 VC_521_0  | 37  | 0.912  | 1          | 0.912  | 0 | 0 | 0 | 1      | Ref |
| KU935730 | Unassigned | Unassigned | Unassigned | 521_0  | Clustered           | 37 VC_521_0  | 37  | 0.912  | 1          | 0.912  | 0 | 0 | 0 | 1      | Ref |
| KU935731 | Unassigned | Unassigned | Unassigned | 521_0  | Clustered           | 37 VC_521_0  | 37  | 0.912  | 1          | 0.912  | 0 | 0 | 0 | 1      | Ref |
| KU946962 | Unassigned | Unassigned | Unassigned | 452_0  | Clustered           | 66 VC_452_0  | 66  | 0.9248 | 1          | 0.9248 | 0 | 0 | 0 | 1      | Ref |
| KU948710 | Unassigned | Unassigned | Unassigned | 838_0  | Clustered           | 29 VC_838_0  | 29  | 0.8611 | 1          | 0.8611 | 0 | 0 | 0 | 1      | Ref |
| KU951146 | Unassigned | Unassigned | Unassigned | 637_0  | Clustered           | 115 VC_637_0 | 115 | 0.731  | 1          | 0.731  | 0 | 0 | 0 | 0.8764 | Ref |
| KU951147 | Unassigned | Unassigned | Unassigned | 637_0  | Clustered           | 115 VC_637_0 | 115 | 0.731  | 1          | 0.731  | 0 | 0 | 0 | 0.8764 | Ref |
| KU958700 | Unassigned | Unassigned | Unassigned | 588_0  | Clustered           | 2 VC_588_0   | 2   | 0.0832 | 0.94395095 | 0.0785 | 0 | 0 | 0 | 1      | Ref |
| KU963245 | Unassigned | Unassigned | Unassigned | 868_0  | Clustered           | 25 VC_868_0  | 25  | 0.5791 | 1          | 0.5791 | 0 | 0 | 0 | 1      | Ref |
| KU963246 | Unassigned | Unassigned | Unassigned | 1175_0 | Clustered           | 22 VC_1175_0 | 22  | 0.4562 | 1          | 0.4562 | 0 | 0 | 0 | 1      | Ref |
| KU963247 | Unassigned | Unassigned | Unassigned | 1175_0 | Clustered           | 22 VC_1175_0 | 22  | 0.4562 | 1          | 0.4562 | 0 | 0 | 0 | 1      | Ref |
| KU963249 | Unassigned | Unassigned | Unassigned | 525_1  | Clustered           | 5 VC_525_1   | 5   | 0.0485 | 0.99999947 | 0.0485 | 0 | 0 | 0 | 0.9    | Ref |
| KU963250 | Unassigned | Unassigned | Unassigned | 1093_0 | Clustered           | 40 VC_1093_0 | 40  | 0.8754 | 1          | 0.8754 | 0 | 0 | 0 | 1      | Ref |
| KU963251 | Unassigned | Unassigned | Unassigned | 1176_0 | Clustered           | 41 VC_1176_0 | 41  | 0.9558 | 1          | 0.9558 | 0 | 0 | 0 | 0.9976 | Ref |
| KU963252 | Unassigned | Unassigned | Unassigned | 1177_0 | Clustered           | 14 VC_1177_0 | 14  | 0.7847 | 1          | 0.7847 | 0 | 0 | 0 | 0.989  | Ref |
| KU963253 | Unassigned | Unassigned | Unassigned | 1095_0 | Clustered           | 16 VC_1095_0 | 16  | 0.458  | 1          | 0.458  | 0 | 0 | 0 | 1      | Ref |
| KU963254 | Unassigned | Unassigned | Unassigned | 1176_0 | Clustered           | 41 VC_1176_0 | 41  | 0.9558 | 1          | 0.9558 | 0 | 0 | 0 | 0.9976 | Ref |
| KU963255 | Unassigned | Unassigned | Unassigned | 525_0  | Clustered           | 25 VC_525_0  | 25  | 0.4597 | 1          | 0.4597 | 0 | 0 | 0 | 1      | Ref |
| KU963256 | Unassigned | Unassigned | Unassigned | 522_0  | Clustered           | 3 VC_522_0   | 3   | 0.0836 | 0.9985266  | 0.0835 | 0 | 0 | 0 | 1      | Ref |
| KU963257 | Unassigned | Unassigned | Unassigned | 525_0  | Clustered           | 25 VC_525_0  | 25  | 0.4597 | 1          | 0.4597 | 0 | 0 | 0 | 1      | Ref |
| KU963258 | Unassigned | Unassigned | Unassigned | 869_0  | Clustered           | 9 VC_869_0   | 9   | 0.2624 | 1          | 0.2624 | 0 | 0 | 0 | 1      | Ref |
| KU963259 | Unassigned | Unassigned | Unassigned | 1176_0 | Clustered           | 41 VC_1176_0 | 41  | 0.9558 | 1          | 0.9558 | 0 | 0 | 0 | 0.9976 | Ref |
| KU963260 | Unassigned | Unassigned | Unassigned | 919_0  | Clustered           | 39 VC_919_0  | 39  | 0.9069 | 1          | 0.9069 | 0 | 0 | 0 | 1      | Ref |
| KU963261 | Unassigned | Unassigned | Unassigned | 954_0  | Clustered           | 13 VC_954_0  | 13  | 0.863  | 1          | 0.863  | 0 | 0 | 0 | 1      | Ref |
| KU963262 | Unassigned | Unassigned | Unassigned | 869_0  | Clustered           | 9 VC_869_0   | 9   | 0.2624 | 1          | 0.2624 | 0 | 0 | 0 | 1      | Ref |
| KU963263 | Unassigned | Unassigned | Unassigned | 525_1  | Clustered           | 5 VC_525_1   | 5   | 0.0485 | 0.99999947 | 0.0485 | 0 | 0 | 0 | 0.9    | Ref |
| KU981050 | Unassigned | Unassigned | Unassigned | 269_0  | Clustered           | 3 VC_269_0   | 3   | 0.1948 | 0.99308177 | 0.1934 | 0 | 0 | 0 | 1      | Ref |
| KU984914 | Unassigned | Unassigned | Unassigned | 514_0  | Clustered           | 75 VC_514_0  | 75  | 0.9402 | 1          | 0.9402 | 0 | 0 | 0 | 1      | Ref |
| KU985090 | Unassigned | Unassigned | Unassigned | 519_0  | Clustered           | 39 VC_519_0  | 39  | 0.8156 | 1          | 0.8156 | 0 | 0 | 0 | 1      | Ref |
| KU985091 | Unassigned | Unassigned | Unassigned | 514_0  | Clustered           | 75 VC_514_0  | 75  | 0.9402 | 1          | 0.9402 | 0 | 0 | 0 | 1      | Ref |
| KU985092 | Unassigned | Unassigned | Unassigned | 517_1  | Clustered           | 108 VC_517_1 | 108 | 0.8483 | 1          | 0.8483 | 0 | 0 | 0 | 0.9955 | Ref |
| KU985093 | Unassigned | Unassigned | Unassigned | 216_6  | Clustered           | 42 VC_216_6  | 42  | 0.473  | 1          | 0.473  | 0 | 0 | 0 | 0.8351 | Ref |
| KU985094 | Unassigned | Unassigned | Unassigned | 517_1  | Clustered           | 108 VC_517_1 | 108 | 0.8483 | 1          | 0.8483 | 0 | 0 | 0 | 0.9955 | Ref |
| KU985095 | Unassigned | Unassigned | Unassigned | 216_6  | Clustered           | 42 VC_216_6  | 42  | 0.473  | 1          | 0.473  | 0 | 0 | 0 | 0.8351 | Ref |
| KU985096 | Unassigned | Unassigned | Unassigned | 223_0  | Clustered           | 38 VC_223_0  | 38  | 0.9095 | 1          | 0.9095 | 0 | 0 | 0 | 1      | Ref |
| KU992911 | Unassigned | Unassigned | Unassigned | 96_0   | Clustered           | 30 VC_96_0   | 30  | 0.718  | 1          | 0.718  | 0 | 0 | 0 | 1      | Ref |
| KU997639 | Unassigned | Unassigned | Unassigned | 888_0  | Clustered           | 28 VC_888_0  | 28  | 0.5497 | 1          | 0.5497 | 0 | 0 | 0 | 1      | Ref |
| KU998234 | Unassigned | Unassigned | Unassigned | 1178_0 | Clustered           | 24 VC_1178_0 | 24  | 0.9524 | 1          | 0.9524 | 0 | 0 | 0 | 1      | Ref |
| KU998235 | Unassigned | Unassigned | Unassigned | 1177_0 | Clustered           | 14 VC_1177_0 | 14  | 0.7847 | 1          | 0.7847 | 0 | 0 | 0 | 0.989  | Ref |
| KU998236 | Unassigned | Unassigned | Unassigned | 1176_0 | Clustered           | 41 VC_1176_0 | 41  | 0.9558 | 1          | 0.9558 | 0 | 0 | 0 | 0.9976 | Ref |
| KU998237 | Unassigned | Unassigned | Unassigned | 406_0  | Clustered           | 11 VC_406_0  | 11  | 0.9449 | 1          | 0.9449 | 0 | 0 | 0 | 1      | Ref |
| KU998238 | Unassigned | Unassigned | Unassigned | 406_0  | Clustered           | 11 VC_406_0  | 11  | 0.9449 | 1          | 0.9449 | 0 | 0 | 0 | 1      | Ref |
| KU998239 | Unassigned | Unassigned | Unassigned | 919_0  | Clustered           | 39 VC_919_0  | 39  | 0.9069 | 1          | 0.9069 | 0 | 0 | 0 | 1      | Ref |
| KU998240 | Unassigned | Unassigned | Unassigned | 866_1  | Clustered           | 20 VC_866_1  | 20  | 0.4814 | 1          | 0.4814 | 0 | 0 | 0 | 1      | Ref |
| KU998241 | Unassigned | Unassigned | Unassigned | 868_0  | Clustered           | 25 VC_868_0  | 25  | 0.5791 | 1          | 0.5791 | 0 | 0 | 0 | 1      | Ref |
| KU998242 | Unassigned | Unassigned | Unassigned | 869_0  | Clustered           | 9 VC_869_0   | 9   | 0.2624 | 1          | 0.2624 | 0 | 0 | 0 | 1      | Ref |
| KU998243 | Unassigned | Unassigned | Unassigned | 869_0  | Clustered           | 9 VC_869_0   | 9   | 0.2624 | 1          | 0.2624 | 0 | 0 | 0 | 1      | Ref |
| KU998244 | Unassigned | Unassigned | Unassigned | 1181_1 | Clustered           | 10 VC_1181_1 | 10  | 0.5828 | 1          | 0.5828 | 0 | 0 | 0 | 1      | Ref |
| KU998245 | Unassigned | Unassigned | Unassigned | 1181_0 | Clustered           | 2 VC_1181_0  | 2   | 0.0461 | 0.95126432 | 0.0439 | 0 | 0 | 0 | 1      | Ref |



|          |            |            |            |         |                     |              |    |        |            |        |   |   |   |            |
|----------|------------|------------|------------|---------|---------------------|--------------|----|--------|------------|--------|---|---|---|------------|
| KU998246 | Unassigned | Unassigned | Unassigned | 1181_1  | Clustered           | 10 VC_1181_1 | 10 | 0.5828 | 1          | 0.5828 | 0 | 0 | 0 | 1 Ref      |
| KU998247 | Unassigned | Unassigned | Unassigned | 1181_1  | Clustered           | 10 VC_1181_1 | 10 | 0.5828 | 1          | 0.5828 | 0 | 0 | 0 | 1 Ref      |
| KU998248 | Unassigned | Unassigned | Unassigned | 1176_0  | Clustered           | 41 VC_1176_0 | 41 | 0.9558 | 1          | 0.9558 | 0 | 0 | 0 | 0.9976 Ref |
| KU998249 | Unassigned | Unassigned | Unassigned | 224_0   | Clustered           | 19 VC_224_0  | 19 | 0.9416 | 1          | 0.9416 | 0 | 0 | 0 | 1 Ref      |
| KU998250 | Unassigned | Unassigned | Unassigned | 224_0   | Clustered           | 19 VC_224_0  | 19 | 0.9416 | 1          | 0.9416 | 0 | 0 | 0 | 1 Ref      |
| KU998251 | Unassigned | Unassigned | Unassigned | 224_0   | Clustered           | 19 VC_224_0  | 19 | 0.9416 | 1          | 0.9416 | 0 | 0 | 0 | 1 Ref      |
| KU998252 | Unassigned | Unassigned | Unassigned | 870_0   | Clustered           | 5 VC_870_0   | 5  | 0.424  | 0.99999997 | 0.424  | 0 | 0 | 0 | 1 Ref      |
| KU998253 | Unassigned | Unassigned | Unassigned | 870_0   | Clustered           | 5 VC_870_0   | 5  | 0.424  | 0.99999997 | 0.424  | 0 | 0 | 0 | 1 Ref      |
| KU998254 | Unassigned | Unassigned | Unassigned | 870_0   | Clustered           | 5 VC_870_0   | 5  | 0.424  | 0.99999997 | 0.424  | 0 | 0 | 0 | 1 Ref      |
| KU998255 | Unassigned | Unassigned | Unassigned | 949_0   | Clustered           | 10 VC_949_0  | 10 | 0.5977 | 1          | 0.5977 | 0 | 0 | 0 | 1 Ref      |
| KU998256 | Unassigned | Unassigned | Unassigned | 949_0   | Clustered           | 10 VC_949_0  | 10 | 0.5977 | 1          | 0.5977 | 0 | 0 | 0 | 1 Ref      |
| KX009778 | Unassigned | Unassigned | Unassigned | 283_139 | Clustered/Singleton | 1 VC_283_139 | 1  | 0      | 1          | 0      | 0 | 0 | 0 | 1 Ref      |
| KX011028 | Unassigned | Unassigned | Unassigned | 149_27  | Clustered/Singleton | 1 VC_149_27  | 1  | 0      | 1          | 0      | 0 | 0 | 0 | 1 Ref      |
| KX011169 | Unassigned | Unassigned | Unassigned | 884_1   | Clustered           | 8 VC_884_1   | 8  | 0.1102 | 0.9989323  | 0.1101 | 0 | 0 | 0 | 0.75 Ref   |
| KX015770 | Unassigned | Unassigned | Unassigned | 584_0   | Clustered           | 28 VC_584_0  | 28 | 0.7704 | 1          | 0.7704 | 0 | 0 | 0 | 1 Ref      |
| KX015771 | Unassigned | Unassigned | Unassigned | 584_0   | Clustered           | 28 VC_584_0  | 28 | 0.7704 | 1          | 0.7704 | 0 | 0 | 0 | 1 Ref      |
| KX017520 | Unassigned | Unassigned | Unassigned | 461_0   | Clustered           | 96 VC_461_0  | 96 | 0.9307 | 1          | 0.9307 | 0 | 0 | 0 | 0.9575 Ref |
| KX017521 | Unassigned | Unassigned | Unassigned | 191_19  | Clustered           | 12 VC_191_19 | 12 | 0.0655 | 1          | 0.0655 | 0 | 0 | 0 | 0.8636 Ref |
| KX058879 | Unassigned | Unassigned | Unassigned | 5_0     | Clustered           | 30 VC_5_0    | 30 | 0.9647 | 1          | 0.9647 | 0 | 0 | 0 | 1 Ref      |
| KX077179 | Unassigned | Unassigned | Unassigned | 182_0   | Clustered           | 5 VC_182_0   | 5  | 0.6184 | 0.99999967 | 0.6184 | 0 | 0 | 0 | 1 Ref      |
| KX077892 | Unassigned | Unassigned | Unassigned | 1187_0  | Clustered           | 3 VC_1187_0  | 3  | 0.924  | 0.92554266 | 0.8552 | 0 | 0 | 0 | 1 Ref      |
| KX077894 | Unassigned | Unassigned | Unassigned | 317_2   | Clustered           | 20 VC_317_2  | 20 | 0.1976 | 1          | 0.1976 | 0 | 0 | 0 | 0.6842 Ref |
| KX077896 | Unassigned | Unassigned | Unassigned | 632_0   | Clustered           | 37 VC_632_0  | 37 | 0.581  | 1          | 0.581  | 0 | 0 | 0 | 0.9234 Ref |
| KX078568 | Unassigned | Unassigned | Unassigned | 390_0   | Clustered           | 4 VC_390_0   | 4  | 0.0468 | 0.9999882  | 0.0468 | 0 | 0 | 0 | 1 Ref      |
| KX078569 | Unassigned | Unassigned | Unassigned | 288_1   | Clustered/Singleton | 1 VC_288_1   | 1  | 0      | 1          | 0      | 0 | 0 | 0 | 1 Ref      |
| KX098389 | Unassigned | Unassigned | Unassigned | 779_2   | Clustered           | 5 VC_779_2   | 5  | 0.0876 | 0.99999997 | 0.0876 | 0 | 0 | 0 | 1 Ref      |
| KX098390 | Unassigned | Unassigned | Unassigned | 779_2   | Clustered           | 5 VC_779_2   | 5  | 0.0876 | 0.99999997 | 0.0876 | 0 | 0 | 0 | 1 Ref      |
| KX098391 | Unassigned | Unassigned | Unassigned | 779_2   | Clustered           | 5 VC_779_2   | 5  | 0.0876 | 0.99999997 | 0.0876 | 0 | 0 | 0 | 1 Ref      |
| KX119174 | Unassigned | Unassigned | Unassigned | 99_0    | Clustered           | 32 VC_99_0   | 32 | 0.8828 | 1          | 0.8828 | 0 | 0 | 0 | 1 Ref      |
| KX119175 | Unassigned | Unassigned | Unassigned | 99_0    | Clustered           | 32 VC_99_0   | 32 | 0.8828 | 1          | 0.8828 | 0 | 0 | 0 | 1 Ref      |
| KX119176 | Unassigned | Unassigned | Unassigned | 99_0    | Clustered           | 32 VC_99_0   | 32 | 0.8828 | 1          | 0.8828 | 0 | 0 | 0 | 1 Ref      |
| KX119177 | Unassigned | Unassigned | Unassigned | 99_0    | Clustered           | 32 VC_99_0   | 32 | 0.8828 | 1          | 0.8828 | 0 | 0 | 0 | 1 Ref      |
| KX119182 | Unassigned | Unassigned | Unassigned | 99_0    | Clustered           | 32 VC_99_0   | 32 | 0.8828 | 1          | 0.8828 | 0 | 0 | 0 | 1 Ref      |
| KX119188 | Unassigned | Unassigned | Unassigned | 99_0    | Clustered           | 32 VC_99_0   | 32 | 0.8828 | 1          | 0.8828 | 0 | 0 | 0 | 1 Ref      |
| KX119189 | Unassigned | Unassigned | Unassigned | 99_0    | Clustered           | 32 VC_99_0   | 32 | 0.8828 | 1          | 0.8828 | 0 | 0 | 0 | 1 Ref      |
| KX119190 | Unassigned | Unassigned | Unassigned | 99_0    | Clustered           | 32 VC_99_0   | 32 | 0.8828 | 1          | 0.8828 | 0 | 0 | 0 | 1 Ref      |
| KX119191 | Unassigned | Unassigned | Unassigned | 99_0    | Clustered           | 32 VC_99_0   | 32 | 0.8828 | 1          | 0.8828 | 0 | 0 | 0 | 1 Ref      |
| KX119192 | Unassigned | Unassigned | Unassigned | 99_0    | Clustered           | 32 VC_99_0   | 32 | 0.8828 | 1          | 0.8828 | 0 | 0 | 0 | 1 Ref      |
| KX119193 | Unassigned | Unassigned | Unassigned | 99_0    | Clustered           | 32 VC_99_0   | 32 | 0.8828 | 1          | 0.8828 | 0 | 0 | 0 | 1 Ref      |
| KX119194 | Unassigned | Unassigned | Unassigned | 99_0    | Clustered           | 32 VC_99_0   | 32 | 0.8828 | 1          | 0.8828 | 0 | 0 | 0 | 1 Ref      |
| KX119195 | Unassigned | Unassigned | Unassigned | 99_0    | Clustered           | 32 VC_99_0   | 32 | 0.8828 | 1          | 0.8828 | 0 | 0 | 0 | 1 Ref      |
| KX119196 | Unassigned | Unassigned | Unassigned | 99_0    | Clustered           | 32 VC_99_0   | 32 | 0.8828 | 1          | 0.8828 | 0 | 0 | 0 | 1 Ref      |
| KX119197 | Unassigned | Unassigned | Unassigned | 99_0    | Clustered           | 32 VC_99_0   | 32 | 0.8828 | 1          | 0.8828 | 0 | 0 | 0 | 1 Ref      |
| KX119198 | Unassigned | Unassigned | Unassigned | 99_0    | Clustered           | 32 VC_99_0   | 32 | 0.8828 | 1          | 0.8828 | 0 | 0 | 0 | 1 Ref      |
| KX119199 | Unassigned | Unassigned | Unassigned | 99_0    | Clustered           | 32 VC_99_0   | 32 | 0.8828 | 1          | 0.8828 | 0 | 0 | 0 | 1 Ref      |
| KX119200 | Unassigned | Unassigned | Unassigned | 99_0    | Clustered           | 32 VC_99_0   | 32 | 0.8828 | 1          | 0.8828 | 0 | 0 | 0 | 1 Ref      |
| KX119201 | Unassigned | Unassigned | Unassigned | 99_0    | Clustered           | 32 VC_99_0   | 32 | 0.8828 | 1          | 0.8828 | 0 | 0 | 0 | 1 Ref      |
| KX119202 | Unassigned | Unassigned | Unassigned | 99_0    | Clustered           | 32 VC_99_0   | 32 | 0.8828 | 1          | 0.8828 | 0 | 0 | 0 | 1 Ref      |
| KX119203 | Unassigned | Unassigned | Unassigned | 99_0    | Clustered           | 32 VC_99_0   | 32 | 0.8828 | 1          | 0.8828 | 0 | 0 | 0 | 1 Ref      |
| KX119204 | Unassigned | Unassigned | Unassigned | 99_0    | Clustered           | 32 VC_99_0   | 32 | 0.8828 | 1          | 0.8828 | 0 | 0 | 0 | 1 Ref      |
| KX119205 | Unassigned | Unassigned | Unassigned | 99_0    | Clustered           | 32 VC_99_0   | 32 | 0.8828 | 1          | 0.8828 | 0 | 0 | 0 | 1 Ref      |
| KX119206 | Unassigned | Unassigned | Unassigned | 99_0    | Clustered           | 32 VC_99_0   | 32 | 0.8828 | 1          | 0.8828 | 0 | 0 | 0 | 1 Ref      |
| KX129925 | Unassigned | Unassigned | Unassigned | 465_0   | Clustered           | 7 VC_465_0   | 7  | 0.3322 | 1          | 0.3322 | 0 | 0 | 0 | 1 Ref      |
| KX130726 | Unassigned | Unassigned | Unassigned | 385_0   | Clustered           | 51 VC_385_0  | 51 | 0.8754 | 1          | 0.8754 | 0 | 0 | 0 | 1 Ref      |
| KX130727 | Unassigned | Unassigned | Unassigned | 668_0   | Clustered           | 25 VC_668_0  | 25 | 0.5539 | 1          | 0.5539 | 0 | 0 | 0 | 0.96 Ref   |
| KX130861 | Unassigned | Unassigned | Unassigned | 283_114 | Clustered/Singleton | 1 VC_283_114 | 1  | 0      | 1          | 0      | 0 | 0 | 0 | 1 Ref      |
| KX130862 | Unassigned | Unassigned | Unassigned | 283_125 | Clustered/Singleton | 1 VC_283_125 | 1  | 0      | 1          | 0      | 0 | 0 | 0 | 1 Ref      |
| KX130863 | Unassigned | Unassigned | Unassigned | 190_0   | Clustered           | 2 VC_190_0   | 2  | 0.0087 | 0.95763473 | 0.0083 | 0 | 0 | 0 | 1 Ref      |
| KX130864 | Unassigned | Unassigned | Unassigned | 283_58  | Clustered/Singleton | 1 VC_283_58  | 1  | 0      | 1          | 0      | 0 | 0 | 0 | 1 Ref      |
| KX130865 | Unassigned | Unassigned | Unassigned | 286_16  | Clustered/Singleton | 1 VC_286_16  | 1  | 0      | 1          | 0      | 0 | 0 | 0 | 1 Ref      |
| KX130960 | Unassigned | Unassigned | Unassigned | 456_0   | Clustered           | 62 VC_456_0  | 62 | 0.9026 | 1          | 0.9026 | 0 | 0 | 0 | 1 Ref      |
| KX147096 | Unassigned | Unassigned | Unassigned | 132_1   | Clustered           | 17 VC_132_1  | 17 | 0.1738 | 1          | 0.1738 | 0 | 0 | 0 | 0.9853 Ref |
| KX147229 | Unassigned | Unassigned | Unassigned | 884_0   | Clustered           | 28 VC_884_0  | 28 | 0.6211 | 1          | 0.6211 | 0 | 0 | 0 | 0.9841 Ref |
| KX156152 | Unassigned | Unassigned | Unassigned | 884_0   | Clustered           | 28 VC_884_0  | 28 | 0.6211 | 1          | 0.6211 | 0 | 0 | 0 | 0.9841 Ref |
| KX159477 | Unassigned | Unassigned | Unassigned | 939_0   | Clustered           | 15 VC_939_0  | 15 | 1      | 0          | 0      | 0 | 0 | 0 | 1 Ref      |
| KX160204 | Unassigned | Unassigned | Unassigned | 262_0   | Clustered           | 5 VC_262_0   | 5  | 0.0724 | 0.99999989 | 0.0724 | 0 | 0 | 0 | 1 Ref      |
| KX160206 | Unassigned | Unassigned | Unassigned | 268_0   | Clustered           | 7 VC_268_0   | 7  | 0.3427 | 1          | 0.3427 | 0 | 0 | 0 | 1 Ref      |
| KX160209 | Unassigned | Unassigned | Unassigned | 268_0   | Clustered           | 7 VC_268_0   | 7  | 0.3427 | 1          | 0.3427 | 0 | 0 | 0 | 1 Ref      |
| KX160210 | Unassigned | Unassigned | Unassigned | 268_0   | Clustered           | 7 VC_268_0   | 7  | 0.3427 | 1          | 0.3427 | 0 | 0 | 0 | 1 Ref      |
| KX160211 | Unassigned | Unassigned | Unassigned | 268_0   | Clustered           | 7 VC_268_0   | 7  | 0.3427 | 1          | 0.3427 | 0 | 0 | 0 | 1 Ref      |
| KX160219 | Unassigned | Unassigned | Unassigned | 262_0   | Clustered           | 5 VC_262_0   | 5  | 0.0724 | 0.99999989 | 0.0724 | 0 | 0 | 0 | 1 Ref      |
| KX160220 | Unassigned | Unassigned | Unassigned | 262_0   | Clustered           | 5 VC_262_0   | 5  | 0.0724 | 0.99999989 | 0.0724 | 0 | 0 | 0 | 1 Ref      |
| KX171208 | Unassigned | Unassigned | Unassigned | 79_0    | Clustered           | 64 VC_79_0   | 64 | 0.4185 | 1          | 0.4185 | 0 | 0 | 0 | 0.7649 Ref |
| KX171209 | Unassigned | Unassigned | Unassigned | 838_0   | Clustered           | 29 VC_838_0  | 29 | 0.8611 | 1          | 0.8611 | 0 | 0 | 0 | 1 Ref      |
| KX171210 | Unassigned | Unassigned | Unassigned | 838_0   | Clustered           | 29 VC_838_0  | 29 | 0.8611 | 1          | 0.8611 | 0 | 0 | 0 | 1 Ref      |
| KX171211 | Unassigned | Unassigned | Unassigned | 133_9   | Clustered           | 3 VC_133_9   | 3  | 0.0099 | 0.98457109 | 0.0098 | 0 | 0 | 0 | 1 Ref      |
| KX171212 | Unassigned | Unassigned | Unassigned | 151_0   | Clustered           | 6 VC_151_0   | 6  | 0.0735 | 1          | 0.0735 | 0 | 0 | 0 | 1 Ref      |
| KX171213 | Unassigned | Unassigned | Unassigned | 151_0   | Clustered           | 6 VC_151_0   | 6  | 0.0735 | 1          | 0.0735 | 0 | 0 | 0 | 1 Ref      |
| KX179905 | Unassigned | Unassigned | Unassigned | 52_0    | Clustered           | 87 VC_52_0   | 87 | 0.9858 | 1          | 0.9858 | 0 | 0 | 0 | 1 Ref      |
| KX181651 | Unassigned | Unassigned | Unassigned | 177_0   | Clustered           | 5 VC_177_0   | 5  | 0.7468 | 0.99885646 | 0.746  | 0 | 0 | 0 | 1 Ref      |
| KX190833 | Unassigned | Unassigned | Unassigned | 731_0   | Clustered           | 2 VC_731_0   | 2  | 0.3697 | 0.94979793 | 0.3512 | 0 | 0 | 0 | 1 Ref      |



|          |            |            |            |        |           |              |     |        |            |        |   |   |   |   |            |
|----------|------------|------------|------------|--------|-----------|--------------|-----|--------|------------|--------|---|---|---|---|------------|
| KX190834 | Unassigned | Unassigned | Unassigned | 829_0  | Clustered | 5 VC_829_0   | 5   | 0.8821 | 0.99999832 | 0.8821 | 0 | 0 | 0 | 0 | 1 Ref      |
| KX190835 | Unassigned | Unassigned | Unassigned | 20_0   | Clustered | 5 VC_20_0    | 5   | 0.4387 | 0.99999934 | 0.4387 | 0 | 0 | 0 | 0 | 1 Ref      |
| KX196154 | Unassigned | Unassigned | Unassigned | 498_0  | Clustered | 8 VC_498_0   | 8   | 0.3987 | 1          | 0.3987 | 0 | 0 | 0 | 0 | 1 Ref      |
| KX198613 | Unassigned | Unassigned | Unassigned | 166_0  | Clustered | 26 VC_166_0  | 26  | 0.7923 | 1          | 0.7923 | 0 | 0 | 0 | 0 | 1 Ref      |
| KX198614 | Unassigned | Unassigned | Unassigned | 614_0  | Clustered | 5 VC_614_0   | 5   | 0.2395 | 0.99999997 | 0.2395 | 0 | 0 | 0 | 0 | 1 Ref      |
| KX198615 | Unassigned | Unassigned | Unassigned | 904_1  | Clustered | 4 VC_904_1   | 4   | 0.1486 | 0.99997723 | 0.1486 | 0 | 0 | 0 | 0 | 1 Ref      |
| KX211991 | Unassigned | Unassigned | Unassigned | 111_0  | Clustered | 91 VC_111_0  | 91  | 0.9587 | 1          | 0.9587 | 0 | 0 | 0 | 0 | 1 Ref      |
| KX223815 | Unassigned | Unassigned | Unassigned | 634_1  | Clustered | 6 VC_634_1   | 6   | 0.4228 | 1          | 0.4228 | 0 | 0 | 0 | 0 | 1 Ref      |
| KX227757 | Unassigned | Unassigned | Unassigned | 654_0  | Clustered | 4 VC_654_0   | 4   | 0.2897 | 0.99998263 | 0.2897 | 0 | 0 | 0 | 0 | 1 Ref      |
| KX227758 | Unassigned | Unassigned | Unassigned | 652_0  | Clustered | 4 VC_652_0   | 4   | 0.4743 | 0.99998076 | 0.4743 | 0 | 0 | 0 | 0 | 1 Ref      |
| KX227759 | Unassigned | Unassigned | Unassigned | 652_0  | Clustered | 4 VC_652_0   | 4   | 0.4743 | 0.99998076 | 0.4743 | 0 | 0 | 0 | 0 | 1 Ref      |
| KX227760 | Unassigned | Unassigned | Unassigned | 654_0  | Clustered | 4 VC_654_0   | 4   | 0.2897 | 0.99998263 | 0.2897 | 0 | 0 | 0 | 0 | 1 Ref      |
| KX229736 | Unassigned | Unassigned | Unassigned | 844_0  | Clustered | 27 VC_844_0  | 27  | 0.9385 | 1          | 0.9385 | 0 | 0 | 0 | 0 | 1 Ref      |
| KX231828 | Unassigned | Unassigned | Unassigned | 125_0  | Clustered | 17 VC_125_0  | 17  | 0.9244 | 1          | 0.9244 | 0 | 0 | 0 | 0 | 1 Ref      |
| KX231829 | Unassigned | Unassigned | Unassigned | 476_0  | Clustered | 19 VC_476_0  | 19  | 0.7814 | 1          | 0.7814 | 0 | 0 | 0 | 0 | 1 Ref      |
| KX232515 | Unassigned | Unassigned | Unassigned | 7_0    | Clustered | 28 VC_7_0    | 28  | 0.3916 | 1          | 0.3916 | 0 | 0 | 0 | 0 | 0.9947 Ref |
| KX236333 | Unassigned | Unassigned | Unassigned | 844_0  | Clustered | 27 VC_844_0  | 27  | 0.9385 | 1          | 0.9385 | 0 | 0 | 0 | 0 | 1 Ref      |
| KX237514 | Unassigned | Unassigned | Unassigned | 111_0  | Clustered | 91 VC_111_0  | 91  | 0.9587 | 1          | 0.9587 | 0 | 0 | 0 | 0 | 1 Ref      |
| KX237515 | Unassigned | Unassigned | Unassigned | 937_0  | Clustered | 40 VC_937_0  | 40  | 0.6809 | 1          | 0.6809 | 0 | 0 | 0 | 0 | 0.9359 Ref |
| KX237516 | Unassigned | Unassigned | Unassigned | 123_0  | Clustered | 23 VC_123_0  | 23  | 0.817  | 1          | 0.817  | 0 | 0 | 0 | 0 | 1 Ref      |
| KX241618 | Unassigned | Unassigned | Unassigned | 169_0  | Clustered | 20 VC_169_0  | 20  | 0.7529 | 1          | 0.7529 | 0 | 0 | 0 | 0 | 1 Ref      |
| KX245012 | Unassigned | Unassigned | Unassigned | 133_30 | Clustered | 2 VC_133_30  | 2   | 0.0052 | 0.87738871 | 0.0046 | 0 | 0 | 0 | 0 | 1 Ref      |
| KX245013 | Unassigned | Unassigned | Unassigned | 637_0  | Clustered | 115 VC_637_0 | 115 | 0.731  | 1          | 0.731  | 0 | 0 | 0 | 0 | 0.8764 Ref |
| KX245890 | Unassigned | Unassigned | Unassigned | 669_1  | Clustered | 10 VC_669_1  | 10  | 0.1268 | 1          | 0.1268 | 0 | 0 | 0 | 0 | 0.9778 Ref |
| KX257490 | Unassigned | Unassigned | Unassigned | 1026_0 | Clustered | 2 VC_1026_0  | 2   | 0.2977 | 0.81445332 | 0.2425 | 0 | 0 | 0 | 0 | 1 Ref      |
| KX258185 | Unassigned | Unassigned | Unassigned | 491_0  | Clustered | 36 VC_491_0  | 36  | 0.5336 | 1          | 0.5336 | 0 | 0 | 0 | 0 | 0.9714 Ref |
| KX266300 | Unassigned | Unassigned | Unassigned | 360_0  | Clustered | 358 VC_360_0 | 358 | 0.9615 | 1          | 0.9615 | 0 | 0 | 0 | 0 | 1 Ref      |
| KX266301 | Unassigned | Unassigned | Unassigned | 360_0  | Clustered | 358 VC_360_0 | 358 | 0.9615 | 1          | 0.9615 | 0 | 0 | 0 | 0 | 1 Ref      |
| KX266302 | Unassigned | Unassigned | Unassigned | 360_0  | Clustered | 358 VC_360_0 | 358 | 0.9615 | 1          | 0.9615 | 0 | 0 | 0 | 0 | 1 Ref      |
| KX266303 | Unassigned | Unassigned | Unassigned | 360_0  | Clustered | 358 VC_360_0 | 358 | 0.9615 | 1          | 0.9615 | 0 | 0 | 0 | 0 | 1 Ref      |
| KX266304 | Unassigned | Unassigned | Unassigned | 360_0  | Clustered | 358 VC_360_0 | 358 | 0.9615 | 1          | 0.9615 | 0 | 0 | 0 | 0 | 1 Ref      |
| KX266305 | Unassigned | Unassigned | Unassigned | 360_0  | Clustered | 358 VC_360_0 | 358 | 0.9615 | 1          | 0.9615 | 0 | 0 | 0 | 0 | 1 Ref      |
| KX266306 | Unassigned | Unassigned | Unassigned | 360_0  | Clustered | 358 VC_360_0 | 358 | 0.9615 | 1          | 0.9615 | 0 | 0 | 0 | 0 | 1 Ref      |
| KX266307 | Unassigned | Unassigned | Unassigned | 360_0  | Clustered | 358 VC_360_0 | 358 | 0.9615 | 1          | 0.9615 | 0 | 0 | 0 | 0 | 1 Ref      |
| KX266308 | Unassigned | Unassigned | Unassigned | 360_0  | Clustered | 358 VC_360_0 | 358 | 0.9615 | 1          | 0.9615 | 0 | 0 | 0 | 0 | 1 Ref      |
| KX266309 | Unassigned | Unassigned | Unassigned | 360_0  | Clustered | 358 VC_360_0 | 358 | 0.9615 | 1          | 0.9615 | 0 | 0 | 0 | 0 | 1 Ref      |
| KX266310 | Unassigned | Unassigned | Unassigned | 360_0  | Clustered | 358 VC_360_0 | 358 | 0.9615 | 1          | 0.9615 | 0 | 0 | 0 | 0 | 1 Ref      |
| KX266311 | Unassigned | Unassigned | Unassigned | 360_0  | Clustered | 358 VC_360_0 | 358 | 0.9615 | 1          | 0.9615 | 0 | 0 | 0 | 0 | 1 Ref      |
| KX266312 | Unassigned | Unassigned | Unassigned | 360_0  | Clustered | 358 VC_360_0 | 358 | 0.9615 | 1          | 0.9615 | 0 | 0 | 0 | 0 | 1 Ref      |
| KX266313 | Unassigned | Unassigned | Unassigned | 360_0  | Clustered | 358 VC_360_0 | 358 | 0.9615 | 1          | 0.9615 | 0 | 0 | 0 | 0 | 1 Ref      |
| KX266314 | Unassigned | Unassigned | Unassigned | 360_0  | Clustered | 358 VC_360_0 | 358 | 0.9615 | 1          | 0.9615 | 0 | 0 | 0 | 0 | 1 Ref      |
| KX266315 | Unassigned | Unassigned | Unassigned | 360_0  | Clustered | 358 VC_360_0 | 358 | 0.9615 | 1          | 0.9615 | 0 | 0 | 0 | 0 | 1 Ref      |
| KX266316 | Unassigned | Unassigned | Unassigned | 360_0  | Clustered | 358 VC_360_0 | 358 | 0.9615 | 1          | 0.9615 | 0 | 0 | 0 | 0 | 1 Ref      |
| KX266317 | Unassigned | Unassigned | Unassigned | 360_0  | Clustered | 358 VC_360_0 | 358 | 0.9615 | 1          | 0.9615 | 0 | 0 | 0 | 0 | 1 Ref      |
| KX266318 | Unassigned | Unassigned | Unassigned | 360_0  | Clustered | 358 VC_360_0 | 358 | 0.9615 | 1          | 0.9615 | 0 | 0 | 0 | 0 | 1 Ref      |
| KX266319 | Unassigned | Unassigned | Unassigned | 360_0  | Clustered | 358 VC_360_0 | 358 | 0.9615 | 1          | 0.9615 | 0 | 0 | 0 | 0 | 1 Ref      |
| KX266320 | Unassigned | Unassigned | Unassigned | 360_0  | Clustered | 358 VC_360_0 | 358 | 0.9615 | 1          | 0.9615 | 0 | 0 | 0 | 0 | 1 Ref      |
| KX266321 | Unassigned | Unassigned | Unassigned | 360_0  | Clustered | 358 VC_360_0 | 358 | 0.9615 | 1          | 0.9615 | 0 | 0 | 0 | 0 | 1 Ref      |
| KX266322 | Unassigned | Unassigned | Unassigned | 360_0  | Clustered | 358 VC_360_0 | 358 | 0.9615 | 1          | 0.9615 | 0 | 0 | 0 | 0 | 1 Ref      |
| KX266323 | Unassigned | Unassigned | Unassigned | 360_0  | Clustered | 358 VC_360_0 | 358 | 0.9615 | 1          | 0.9615 | 0 | 0 | 0 | 0 | 1 Ref      |
| KX266324 | Unassigned | Unassigned | Unassigned | 360_0  | Clustered | 358 VC_360_0 | 358 | 0.9615 | 1          | 0.9615 | 0 | 0 | 0 | 0 | 1 Ref      |
| KX266325 | Unassigned | Unassigned | Unassigned | 360_0  | Clustered | 358 VC_360_0 | 358 | 0.9615 | 1          | 0.9615 | 0 | 0 | 0 | 0 | 1 Ref      |
| KX266326 | Unassigned | Unassigned | Unassigned | 360_0  | Clustered | 358 VC_360_0 | 358 | 0.9615 | 1          | 0.9615 | 0 | 0 | 0 | 0 | 1 Ref      |
| KX266327 | Unassigned | Unassigned | Unassigned | 360_0  | Clustered | 358 VC_360_0 | 358 | 0.9615 | 1          | 0.9615 | 0 | 0 | 0 | 0 | 1 Ref      |
| KX266328 | Unassigned | Unassigned | Unassigned | 360_0  | Clustered | 358 VC_360_0 | 358 | 0.9615 | 1          | 0.9615 | 0 | 0 | 0 | 0 | 1 Ref      |
| KX266329 | Unassigned | Unassigned | Unassigned | 360_0  | Clustered | 358 VC_360_0 | 358 | 0.9615 | 1          | 0.9615 | 0 | 0 | 0 | 0 | 1 Ref      |
| KX266330 | Unassigned | Unassigned | Unassigned | 360_0  | Clustered | 358 VC_360_0 | 358 | 0.9615 | 1          | 0.9615 | 0 | 0 | 0 | 0 | 1 Ref      |
| KX266331 | Unassigned | Unassigned | Unassigned | 360_0  | Clustered | 358 VC_360_0 | 358 | 0.9615 | 1          | 0.9615 | 0 | 0 | 0 | 0 | 1 Ref      |
| KX266332 | Unassigned | Unassigned | Unassigned | 360_0  | Clustered | 358 VC_360_0 | 358 | 0.9615 | 1          | 0.9615 | 0 | 0 | 0 | 0 | 1 Ref      |
| KX266333 | Unassigned | Unassigned | Unassigned | 360_0  | Clustered | 358 VC_360_0 | 358 | 0.9615 | 1          | 0.9615 | 0 | 0 | 0 | 0 | 1 Ref      |
| KX266334 | Unassigned | Unassigned | Unassigned | 360_0  | Clustered | 358 VC_360_0 | 358 | 0.9615 | 1          | 0.9615 | 0 | 0 | 0 | 0 | 1 Ref      |
| KX266335 | Unassigned | Unassigned | Unassigned | 360_0  | Clustered | 358 VC_360_0 | 358 | 0.9615 | 1          | 0.9615 | 0 | 0 | 0 | 0 | 1 Ref      |
| KX266336 | Unassigned | Unassigned | Unassigned | 360_0  | Clustered | 358 VC_360_0 | 358 | 0.9615 | 1          | 0.9615 | 0 | 0 | 0 | 0 | 1 Ref      |
| KX266337 | Unassigned | Unassigned | Unassigned | 360_0  | Clustered | 358 VC_360_0 | 358 | 0.9615 | 1          | 0.9615 | 0 | 0 | 0 | 0 | 1 Ref      |
| KX266338 | Unassigned | Unassigned | Unassigned | 360_0  | Clustered | 358 VC_360_0 | 358 | 0.9615 | 1          | 0.9615 | 0 | 0 | 0 | 0 | 1 Ref      |
| KX266339 | Unassigned | Unassigned | Unassigned | 360_0  | Clustered | 358 VC_360_0 | 358 | 0.9615 | 1          | 0.9615 | 0 | 0 | 0 | 0 | 1 Ref      |
| KX266340 | Unassigned | Unassigned | Unassigned | 360_0  | Clustered | 358 VC_360_0 | 358 | 0.9615 | 1          | 0.9615 | 0 | 0 | 0 | 0 | 1 Ref      |
| KX266341 | Unassigned | Unassigned | Unassigned | 360_0  | Clustered | 358 VC_360_0 | 358 | 0.9615 | 1          | 0.9615 | 0 | 0 | 0 | 0 | 1 Ref      |
| KX266342 | Unassigned | Unassigned | Unassigned | 360_0  | Clustered | 358 VC_360_0 | 358 | 0.9615 | 1          | 0.9615 | 0 | 0 | 0 | 0 | 1 Ref      |
| KX266343 | Unassigned | Unassigned | Unassigned | 360_0  | Clustered | 358 VC_360_0 | 358 | 0.9615 | 1          | 0.9615 | 0 | 0 | 0 | 0 | 1 Ref      |
| KX266344 | Unassigned | Unassigned | Unassigned | 360_0  | Clustered | 358 VC_360_0 | 358 | 0.9615 | 1          | 0.9615 | 0 | 0 | 0 | 0 | 1 Ref      |
| KX266345 | Unassigned | Unassigned | Unassigned | 360_0  | Clustered | 358 VC_360_0 | 358 | 0.9615 | 1          | 0.9615 | 0 | 0 | 0 | 0 | 1 Ref      |
| KX266346 | Unassigned | Unassigned | Unassigned | 360_0  | Clustered | 358 VC_360_0 | 358 | 0.9615 | 1          | 0.9615 | 0 | 0 | 0 | 0 | 1 Ref      |
| KX266347 | Unassigned | Unassigned | Unassigned | 360_0  | Clustered | 358 VC_360_0 | 358 | 0.9615 | 1          | 0.9615 | 0 | 0 | 0 | 0 | 1 Ref      |
| KX266348 | Unassigned | Unassigned | Unassigned | 360_0  | Clustered | 358 VC_360_0 | 358 | 0.9615 | 1          | 0.9615 | 0 | 0 | 0 | 0 | 1 Ref      |
| KX266349 | Unassigned | Unassigned | Unassigned | 360_0  | Clustered | 358 VC_360_0 | 358 | 0.9615 | 1          | 0.9615 | 0 | 0 | 0 | 0 | 1 Ref      |
| KX266350 | Unassigned | Unassigned | Unassigned | 360_0  | Clustered | 358 VC_360_0 | 358 | 0.9615 | 1          | 0.9615 | 0 | 0 | 0 | 0 | 1 Ref      |
| KX266351 | Unassigned | Unassigned | Unassigned | 360_0  | Clustered | 358 VC_360_0 | 358 | 0.9615 | 1          | 0.9615 | 0 | 0 | 0 | 0 | 1 Ref      |
| KX266352 | Unassigned | Unassigned | Unassigned | 360_0  | Clustered | 358 VC_360_0 | 358 | 0.9615 | 1          | 0.9615 | 0 | 0 | 0 | 0 | 1 Ref      |
| KX266353 | Unassigned | Unassigned | Unassigned | 360_0  | Clustered | 358 VC_360_0 | 358 | 0.9615 | 1          | 0.9615 | 0 | 0 | 0 | 0 | 1 Ref      |
| KX266354 | Unassigned | Unassigned | Unassigned | 360_0  | Clustered | 358 VC_360_0 | 358 | 0.9615 | 1          | 0.9615 | 0 | 0 | 0 | 0 | 1 Ref      |



[illegible]



[illegible]



[illegible]



[illegible]



[illegible]



|          |            |            |            |         |                     |               |     |        |            |        |   |   |   |            |
|----------|------------|------------|------------|---------|---------------------|---------------|-----|--------|------------|--------|---|---|---|------------|
| KX452696 | Unassigned | Unassigned | Unassigned | 385_0   | Clustered           | 51 VC_385_0   | 51  | 0.8754 | 1          | 0.8754 | 0 | 0 | 0 | 1 Ref      |
| KX452697 | Unassigned | Unassigned | Unassigned | 132_0   | Clustered           | 4 VC_132_0    | 4   | 0.036  | 0.99998777 | 0.036  | 0 | 0 | 0 | 1 Ref      |
| KX452698 | Unassigned | Unassigned | Unassigned | 283_143 | Clustered/Singleton | 1 VC_283_143  | 1   | 0      | 1          | 0      | 0 | 0 | 0 | 1 Ref      |
| KX452699 | Unassigned | Unassigned | Unassigned | 592_0   | Clustered           | 50 VC_592_0   | 50  | 0.7314 | 1          | 0.7314 | 0 | 0 | 0 | 1 Ref      |
| KX452700 | Unassigned | Unassigned | Unassigned | 592_0   | Clustered           | 50 VC_592_0   | 50  | 0.7314 | 1          | 0.7314 | 0 | 0 | 0 | 1 Ref      |
| KX455876 | Unassigned | Unassigned | Unassigned | 1189_0  | Clustered           | 9 VC_1189_0   | 9   | 0.968  | 1          | 0.968  | 0 | 0 | 0 | 1 Ref      |
| KX456206 | Unassigned | Unassigned | Unassigned | 265_0   | Clustered           | 12 VC_265_0   | 12  | 0.4401 | 1          | 0.4401 | 0 | 0 | 0 | 1 Ref      |
| KX456208 | Unassigned | Unassigned | Unassigned | 265_0   | Clustered           | 12 VC_265_0   | 12  | 0.4401 | 1          | 0.4401 | 0 | 0 | 0 | 1 Ref      |
| KX456209 | Unassigned | Unassigned | Unassigned | 265_0   | Clustered           | 12 VC_265_0   | 12  | 0.4401 | 1          | 0.4401 | 0 | 0 | 0 | 1 Ref      |
| KX456210 | Unassigned | Unassigned | Unassigned | 265_0   | Clustered           | 12 VC_265_0   | 12  | 0.4401 | 1          | 0.4401 | 0 | 0 | 0 | 1 Ref      |
| KX456211 | Unassigned | Unassigned | Unassigned | 262_0   | Clustered           | 5 VC_262_0    | 5   | 0.0724 | 0.99999989 | 0.0724 | 0 | 0 | 0 | 1 Ref      |
| KX456213 | Unassigned | Unassigned | Unassigned | 265_0   | Clustered           | 12 VC_265_0   | 12  | 0.4401 | 1          | 0.4401 | 0 | 0 | 0 | 1 Ref      |
| KX458236 | Unassigned | Unassigned | Unassigned | 517_1   | Clustered           | 108 VC_517_1  | 108 | 0.8483 | 1          | 0.8483 | 0 | 0 | 0 | 0.9955 Ref |
| KX458237 | Unassigned | Unassigned | Unassigned | 514_0   | Clustered           | 75 VC_514_0   | 75  | 0.9402 | 1          | 0.9402 | 0 | 0 | 0 | 1 Ref      |
| KX467643 | Unassigned | Unassigned | Unassigned | 349_0   | Clustered           | 7 VC_349_0    | 7   | 0.9363 | 0.99999996 | 0.9363 | 0 | 0 | 0 | 1 Ref      |
| KX495186 | Unassigned | Unassigned | Unassigned | 187_3   | Clustered           | 9 VC_187_3    | 9   | 0.1971 | 1          | 0.1971 | 0 | 0 | 0 | 0.8611 Ref |
| KX507045 | Unassigned | Unassigned | Unassigned | 642_3   | Clustered           | 9 VC_642_3    | 9   | 0.2131 | 1          | 0.2131 | 0 | 0 | 0 | 0.6944 Ref |
| KX507046 | Unassigned | Unassigned | Unassigned | 493_11  | Clustered/Singleton | 1 VC_493_11   | 1   | 0      | 1          | 0      | 0 | 0 | 0 | 1 Ref      |
| KX507343 | Unassigned | Unassigned | Unassigned | 982_0   | Clustered           | 62 VC_982_0   | 62  | 0.8646 | 1          | 0.8646 | 0 | 0 | 0 | 0.743 Ref  |
| KX507344 | Unassigned | Unassigned | Unassigned | 982_0   | Clustered           | 62 VC_982_0   | 62  | 0.8646 | 1          | 0.8646 | 0 | 0 | 0 | 0.743 Ref  |
| KX507345 | Unassigned | Unassigned | Unassigned | 982_0   | Clustered           | 62 VC_982_0   | 62  | 0.8646 | 1          | 0.8646 | 0 | 0 | 0 | 0.743 Ref  |
| KX507361 | Unassigned | Unassigned | Unassigned | 888_0   | Clustered           | 28 VC_888_0   | 28  | 0.5497 | 1          | 0.5497 | 0 | 0 | 0 | 1 Ref      |
| KX507362 | Unassigned | Unassigned | Unassigned | 514_0   | Clustered           | 75 VC_514_0   | 75  | 0.9402 | 1          | 0.9402 | 0 | 0 | 0 | 1 Ref      |
| KX513864 | Unassigned | Unassigned | Unassigned | 1123_0  | Clustered           | 2 VC_1123_0   | 2   | 0.3187 | 0.93270267 | 0.2972 | 0 | 0 | 0 | 1 Ref      |
| KX513865 | Unassigned | Unassigned | Unassigned | 1104_0  | Clustered           | 154 VC_1104_0 | 154 | 0.8484 | 1          | 0.8484 | 0 | 0 | 0 | 1 Ref      |
| KX513866 | Unassigned | Unassigned | Unassigned | 1119_0  | Clustered           | 20 VC_1119_0  | 20  | 0.6751 | 0.99997892 | 0.6751 | 0 | 0 | 0 | 1 Ref      |
| KX513867 | Unassigned | Unassigned | Unassigned | 1143_0  | Clustered           | 9 VC_1143_0   | 9   | 0.7268 | 1          | 0.7268 | 0 | 0 | 0 | 1 Ref      |
| KX513868 | Unassigned | Unassigned | Unassigned | 1127_0  | Clustered           | 19 VC_1127_0  | 19  | 0.7611 | 1          | 0.7611 | 0 | 0 | 0 | 1 Ref      |
| KX513869 | Unassigned | Unassigned | Unassigned | 1056_0  | Clustered           | 4 VC_1056_0   | 4   | 0.169  | 0.84110627 | 0.1421 | 0 | 0 | 0 | 1 Ref      |
| KX513870 | Unassigned | Unassigned | Unassigned | 1119_0  | Clustered           | 20 VC_1119_0  | 20  | 0.6751 | 0.99997892 | 0.6751 | 0 | 0 | 0 | 1 Ref      |
| KX513871 | Unassigned | Unassigned | Unassigned | 1191_0  | Clustered           | 3 VC_1191_0   | 3   | 0.1408 | 0.98976974 | 0.1394 | 0 | 0 | 0 | 1 Ref      |
| KX513872 | Unassigned | Unassigned | Unassigned | 1143_0  | Clustered           | 9 VC_1143_0   | 9   | 0.7268 | 1          | 0.7268 | 0 | 0 | 0 | 1 Ref      |
| KX513873 | Unassigned | Unassigned | Unassigned | 1122_0  | Clustered           | 10 VC_1122_0  | 10  | 0.9643 | 0.99999697 | 0.9643 | 0 | 0 | 0 | 1 Ref      |
| KX513874 | Unassigned | Unassigned | Unassigned | 1143_0  | Clustered           | 9 VC_1143_0   | 9   | 0.7268 | 1          | 0.7268 | 0 | 0 | 0 | 1 Ref      |
| KX513875 | Unassigned | Unassigned | Unassigned | 1197_0  | Clustered           | 15 VC_1197_0  | 15  | 0.8991 | 0.76608394 | 0.6888 | 0 | 0 | 0 | 1 Ref      |
| KX513877 | Unassigned | Unassigned | Unassigned | 1127_0  | Clustered           | 19 VC_1127_0  | 19  | 0.7611 | 1          | 0.7611 | 0 | 0 | 0 | 1 Ref      |
| KX522565 | Unassigned | Unassigned | Unassigned | 22_0    | Clustered           | 11 VC_22_0    | 11  | 0.5163 | 1          | 0.5163 | 0 | 0 | 0 | 1 Ref      |
| KX522649 | Unassigned | Unassigned | Unassigned | 325_21  | Clustered           | 5 VC_325_21   | 5   | 0.0209 | 0.99999976 | 0.0209 | 0 | 0 | 0 | 0.8 Ref    |
| KX522650 | Unassigned | Unassigned | Unassigned | 1074_0  | Clustered           | 19 VC_1074_0  | 19  | 0.9198 | 1          | 0.9198 | 0 | 0 | 0 | 1 Ref      |
| KX522943 | Unassigned | Unassigned | Unassigned | 325_21  | Clustered           | 5 VC_325_21   | 5   | 0.0209 | 0.99999976 | 0.0209 | 0 | 0 | 0 | 0.8 Ref    |
| KX523125 | Unassigned | Unassigned | Unassigned | 514_0   | Clustered           | 75 VC_514_0   | 75  | 0.9402 | 1          | 0.9402 | 0 | 0 | 0 | 1 Ref      |
| KX523699 | Unassigned | Unassigned | Unassigned | 461_0   | Clustered           | 96 VC_461_0   | 96  | 0.9307 | 1          | 0.9307 | 0 | 0 | 0 | 0.9575 Ref |
| KX532239 | Unassigned | Unassigned | Unassigned | 153_0   | Clustered           | 25 VC_153_0   | 25  | 0.7729 | 1          | 0.7729 | 0 | 0 | 0 | 1 Ref      |
| KX534004 | Unassigned | Unassigned | Unassigned | 761_0   | Clustered           | 67 VC_761_0   | 67  | 0.8947 | 1          | 0.8947 | 0 | 0 | 0 | 1 Ref      |
| KX534335 | Unassigned | Unassigned | Unassigned | 835_0   | Clustered           | 67 VC_835_0   | 67  | 0.9624 | 1          | 0.9624 | 0 | 0 | 0 | 1 Ref      |
| KX534336 | Unassigned | Unassigned | Unassigned | 835_0   | Clustered           | 67 VC_835_0   | 67  | 0.9624 | 1          | 0.9624 | 0 | 0 | 0 | 1 Ref      |
| KX534337 | Unassigned | Unassigned | Unassigned | 795_0   | Clustered           | 19 VC_795_0   | 19  | 0.6848 | 1          | 0.6848 | 0 | 0 | 0 | 1 Ref      |
| KX534338 | Unassigned | Unassigned | Unassigned | 835_0   | Clustered           | 67 VC_835_0   | 67  | 0.9624 | 1          | 0.9624 | 0 | 0 | 0 | 1 Ref      |
| KX534339 | Unassigned | Unassigned | Unassigned | 835_0   | Clustered           | 67 VC_835_0   | 67  | 0.9624 | 1          | 0.9624 | 0 | 0 | 0 | 1 Ref      |
| KX534340 | Unassigned | Unassigned | Unassigned | 20_0    | Clustered           | 5 VC_20_0     | 5   | 0.4387 | 0.99999934 | 0.4387 | 0 | 0 | 0 | 1 Ref      |
| KX534341 | Unassigned | Unassigned | Unassigned | 835_0   | Clustered           | 67 VC_835_0   | 67  | 0.9624 | 1          | 0.9624 | 0 | 0 | 0 | 1 Ref      |
| KX550065 | Unassigned | Unassigned | Unassigned | 412_0   | Clustered           | 39 VC_412_0   | 39  | 0.845  | 1          | 0.845  | 0 | 0 | 0 | 1 Ref      |
| KX550082 | Unassigned | Unassigned | Unassigned | 956_0   | Clustered           | 39 VC_956_0   | 39  | 1      | 1          | 1      | 0 | 0 | 0 | 1 Ref      |
| KX550441 | Unassigned | Unassigned | Unassigned | 517_1   | Clustered           | 108 VC_517_1  | 108 | 0.8483 | 1          | 0.8483 | 0 | 0 | 0 | 0.9955 Ref |
| KX550442 | Unassigned | Unassigned | Unassigned | 517_0   | Clustered           | 18 VC_517_0   | 18  | 0.1599 | 1          | 0.1599 | 0 | 0 | 0 | 1 Ref      |
| KX550443 | Unassigned | Unassigned | Unassigned | 325_53  | Clustered           | 7 VC_325_53   | 7   | 0.0242 | 1          | 0.0242 | 0 | 0 | 0 | 0.9048 Ref |
| KX552041 | Unassigned | Unassigned | Unassigned | 847_1   | Clustered           | 26 VC_847_1   | 26  | 0.6323 | 1          | 0.6323 | 0 | 0 | 0 | 0.9815 Ref |
| KX555527 | Unassigned | Unassigned | Unassigned | 861_0   | Clustered           | 9 VC_861_0    | 9   | 0.5869 | 1          | 0.5869 | 0 | 0 | 0 | 1 Ref      |
| KX557234 | Unassigned | Unassigned | Unassigned | 517_1   | Clustered           | 108 VC_517_1  | 108 | 0.8483 | 1          | 0.8483 | 0 | 0 | 0 | 0.9955 Ref |
| KX557272 | Unassigned | Unassigned | Unassigned | 1182_0  | Clustered           | 4 VC_1182_0   | 4   | 0.2845 | 0.99997676 | 0.2845 | 0 | 0 | 0 | 1 Ref      |
| KX557273 | Unassigned | Unassigned | Unassigned | 525_0   | Clustered           | 25 VC_525_0   | 25  | 0.4597 | 1          | 0.4597 | 0 | 0 | 0 | 1 Ref      |
| KX557274 | Unassigned | Unassigned | Unassigned | 1176_0  | Clustered           | 41 VC_1176_0  | 41  | 0.9558 | 1          | 0.9558 | 0 | 0 | 0 | 0.9976 Ref |
| KX557275 | Unassigned | Unassigned | Unassigned | 1176_0  | Clustered           | 41 VC_1176_0  | 41  | 0.9558 | 1          | 0.9558 | 0 | 0 | 0 | 0.9976 Ref |
| KX557276 | Unassigned | Unassigned | Unassigned | 1181_1  | Clustered           | 10 VC_1181_1  | 10  | 0.5828 | 1          | 0.5828 | 0 | 0 | 0 | 1 Ref      |
| KX557278 | Unassigned | Unassigned | Unassigned | 1161_0  | Clustered           | 2 VC_1161_0   | 2   | 0.0296 | 0.9573719  | 0.0283 | 0 | 0 | 0 | 1 Ref      |
| KX557279 | Unassigned | Unassigned | Unassigned | 1177_0  | Clustered           | 14 VC_1177_0  | 14  | 0.7847 | 1          | 0.7847 | 0 | 0 | 0 | 0.989 Ref  |
| KX557280 | Unassigned | Unassigned | Unassigned | 224_0   | Clustered           | 19 VC_224_0   | 19  | 0.9416 | 1          | 0.9416 | 0 | 0 | 0 | 1 Ref      |
| KX557281 | Unassigned | Unassigned | Unassigned | 867_0   | Clustered           | 6 VC_867_0    | 6   | 0.3202 | 1          | 0.3202 | 0 | 0 | 0 | 1 Ref      |
| KX557282 | Unassigned | Unassigned | Unassigned | 1184_0  | Clustered           | 5 VC_1184_0   | 5   | 0.6591 | 0.99999982 | 0.6591 | 0 | 0 | 0 | 1 Ref      |
| KX557283 | Unassigned | Unassigned | Unassigned | 224_0   | Clustered           | 19 VC_224_0   | 19  | 0.9416 | 1          | 0.9416 | 0 | 0 | 0 | 1 Ref      |
| KX557284 | Unassigned | Unassigned | Unassigned | 224_0   | Clustered           | 19 VC_224_0   | 19  | 0.9416 | 1          | 0.9416 | 0 | 0 | 0 | 1 Ref      |
| KX557285 | Unassigned | Unassigned | Unassigned | 570_0   | Clustered           | 9 VC_570_0    | 9   | 0.499  | 1          | 0.499  | 0 | 0 | 0 | 1 Ref      |
| KX557286 | Unassigned | Unassigned | Unassigned | 1178_0  | Clustered           | 24 VC_1178_0  | 24  | 0.9524 | 1          | 0.9524 | 0 | 0 | 0 | 1 Ref      |
| KX557287 | Unassigned | Unassigned | Unassigned | 525_0   | Clustered           | 25 VC_525_0   | 25  | 0.4597 | 1          | 0.4597 | 0 | 0 | 0 | 1 Ref      |
| KX574454 | Unassigned | Unassigned | Unassigned | 325_21  | Clustered           | 5 VC_325_21   | 5   | 0.0209 | 0.99999976 | 0.0209 | 0 | 0 | 0 | 0.8 Ref    |
| KX574455 | Unassigned | Unassigned | Unassigned | 215_1   | Clustered           | 19 VC_215_1   | 19  | 0.4188 | 1          | 0.4188 | 0 | 0 | 0 | 1 Ref      |
| KX576638 | Unassigned | Unassigned | Unassigned | 223_0   | Clustered           | 38 VC_223_0   | 38  | 0.9095 | 1          | 0.9095 | 0 | 0 | 0 | 1 Ref      |
| KX576639 | Unassigned | Unassigned | Unassigned | 216_6   | Clustered           | 42 VC_216_6   | 42  | 0.473  | 1          | 0.473  | 0 | 0 | 0 | 0.8351 Ref |
| KX576640 | Unassigned | Unassigned | Unassigned | 1160_0  | Clustered           | 73 VC_1160_0  | 73  | 0.9835 | 1          | 0.9835 | 0 | 0 | 0 | 1 Ref      |
| KX576641 | Unassigned | Unassigned | Unassigned | 1160_0  | Clustered           | 73 VC_1160_0  | 73  | 0.9835 | 1          | 0.9835 | 0 | 0 | 0 | 1 Ref      |
| KX576642 | Unassigned | Unassigned | Unassigned | 950_0   | Clustered           | 38 VC_950_0   | 38  | 0.9443 | 1          | 0.9443 | 0 | 0 | 0 | 1 Ref      |



|          |            |            |            |        |                     |              |     |        |            |        |   |   |   |        |     |
|----------|------------|------------|------------|--------|---------------------|--------------|-----|--------|------------|--------|---|---|---|--------|-----|
| KX576643 | Unassigned | Unassigned | Unassigned | 371_18 | Clustered           | 10 VC_371_18 | 10  | 0.0302 | 1          | 0.0302 | 0 | 0 | 0 | 0.8    | Ref |
| KX576644 | Unassigned | Unassigned | Unassigned | 520_77 | Clustered           | 3 VC_520_77  | 3   | 0.0218 | 0.99859911 | 0.0218 | 0 | 0 | 0 | 1      | Ref |
| KX576645 | Unassigned | Unassigned | Unassigned | 371_13 | Clustered           | 33 VC_371_13 | 33  | 0.179  | 1          | 0.179  | 0 | 0 | 0 | 0.8769 | Ref |
| KX576646 | Unassigned | Unassigned | Unassigned | 371_13 | Clustered           | 33 VC_371_13 | 33  | 0.179  | 1          | 0.179  | 0 | 0 | 0 | 0.8769 | Ref |
| KX576647 | Unassigned | Unassigned | Unassigned | 371_13 | Clustered           | 33 VC_371_13 | 33  | 0.179  | 1          | 0.179  | 0 | 0 | 0 | 0.8769 | Ref |
| KX578042 | Unassigned | Unassigned | Unassigned | 862_0  | Clustered           | 11 VC_862_0  | 11  | 0.6745 | 1          | 0.6745 | 0 | 0 | 0 | 1      | Ref |
| KX578043 | Unassigned | Unassigned | Unassigned | 862_0  | Clustered           | 11 VC_862_0  | 11  | 0.6745 | 1          | 0.6745 | 0 | 0 | 0 | 1      | Ref |
| KX578044 | Unassigned | Unassigned | Unassigned | 862_0  | Clustered           | 11 VC_862_0  | 11  | 0.6745 | 1          | 0.6745 | 0 | 0 | 0 | 1      | Ref |
| KX578071 | Unassigned | Unassigned | Unassigned | 371_15 | Clustered           | 44 VC_371_15 | 44  | 0.1391 | 1          | 0.1391 | 0 | 0 | 0 | 0.7474 | Ref |
| KX579975 | Unassigned | Unassigned | Unassigned | 517_0  | Clustered           | 18 VC_517_0  | 18  | 0.1599 | 1          | 0.1599 | 0 | 0 | 0 | 1      | Ref |
| KX580961 | Unassigned | Unassigned | Unassigned | 888_0  | Clustered           | 28 VC_888_0  | 28  | 0.5497 | 1          | 0.5497 | 0 | 0 | 0 | 1      | Ref |
| KX580962 | Unassigned | Unassigned | Unassigned | 888_0  | Clustered           | 28 VC_888_0  | 28  | 0.5497 | 1          | 0.5497 | 0 | 0 | 0 | 1      | Ref |
| KX581090 | Unassigned | Unassigned | Unassigned | 299_0  | Clustered           | 24 VC_299_0  | 24  | 0.9905 | 1          | 0.9905 | 0 | 0 | 0 | 1      | Ref |
| KX581091 | Unassigned | Unassigned | Unassigned | 299_0  | Clustered           | 24 VC_299_0  | 24  | 0.9905 | 1          | 0.9905 | 0 | 0 | 0 | 1      | Ref |
| KX581092 | Unassigned | Unassigned | Unassigned | 299_0  | Clustered           | 24 VC_299_0  | 24  | 0.9905 | 1          | 0.9905 | 0 | 0 | 0 | 1      | Ref |
| KX581093 | Unassigned | Unassigned | Unassigned | 299_0  | Clustered           | 24 VC_299_0  | 24  | 0.9905 | 1          | 0.9905 | 0 | 0 | 0 | 1      | Ref |
| KX581094 | Unassigned | Unassigned | Unassigned | 299_0  | Clustered           | 24 VC_299_0  | 24  | 0.9905 | 1          | 0.9905 | 0 | 0 | 0 | 1      | Ref |
| KX581095 | Unassigned | Unassigned | Unassigned | 299_0  | Clustered           | 24 VC_299_0  | 24  | 0.9905 | 1          | 0.9905 | 0 | 0 | 0 | 1      | Ref |
| KX581096 | Unassigned | Unassigned | Unassigned | 299_0  | Clustered           | 24 VC_299_0  | 24  | 0.9905 | 1          | 0.9905 | 0 | 0 | 0 | 1      | Ref |
| KX581097 | Unassigned | Unassigned | Unassigned | 299_0  | Clustered           | 24 VC_299_0  | 24  | 0.9905 | 1          | 0.9905 | 0 | 0 | 0 | 1      | Ref |
| KX581098 | Unassigned | Unassigned | Unassigned | 299_0  | Clustered           | 24 VC_299_0  | 24  | 0.9905 | 1          | 0.9905 | 0 | 0 | 0 | 1      | Ref |
| KX581099 | Unassigned | Unassigned | Unassigned | 299_0  | Clustered           | 24 VC_299_0  | 24  | 0.9905 | 1          | 0.9905 | 0 | 0 | 0 | 1      | Ref |
| KX581100 | Unassigned | Unassigned | Unassigned | 299_0  | Clustered           | 24 VC_299_0  | 24  | 0.9905 | 1          | 0.9905 | 0 | 0 | 0 | 1      | Ref |
| KX585251 | Unassigned | Unassigned | Unassigned | 238_0  | Clustered           | 17 VC_238_0  | 17  | 0.6109 | 1          | 0.6109 | 0 | 0 | 0 | 1      | Ref |
| KX585252 | Unassigned | Unassigned | Unassigned | 225_0  | Clustered           | 32 VC_225_0  | 32  | 0.848  | 1          | 0.848  | 0 | 0 | 0 | 0.996  | Ref |
| KX585253 | Unassigned | Unassigned | Unassigned | 236_0  | Clustered           | 72 VC_236_0  | 72  | 0.8104 | 1          | 0.8104 | 0 | 0 | 0 | 1      | Ref |
| KX587949 | Unassigned | Unassigned | Unassigned | 111_0  | Clustered           | 91 VC_111_0  | 91  | 0.9587 | 1          | 0.9587 | 0 | 0 | 0 | 1      | Ref |
| KX588251 | Unassigned | Unassigned | Unassigned | 761_0  | Clustered           | 67 VC_761_0  | 67  | 0.8947 | 1          | 0.8947 | 0 | 0 | 0 | 1      | Ref |
| KX589269 | Unassigned | Unassigned | Unassigned | 372_0  | Clustered           | 24 VC_372_0  | 24  | 0.5539 | 1          | 0.5539 | 0 | 0 | 0 | 1      | Ref |
| KX591654 | Unassigned | Unassigned | Unassigned | 823_0  | Clustered           | 124 VC_823_0 | 124 | 0.9492 | 1          | 0.9492 | 0 | 0 | 0 | 1      | Ref |
| KX592589 | Unassigned | Unassigned | Unassigned | 371_11 | Clustered           | 31 VC_371_11 | 31  | 0.0927 | 1          | 0.0927 | 0 | 0 | 0 | 0.7011 | Ref |
| KX607101 | Unassigned | Unassigned | Unassigned | 447_0  | Clustered           | 3 VC_447_0   | 3   | 0.8268 | 0.99509929 | 0.8227 | 0 | 0 | 0 | 1      | Ref |
| KX607102 | Unassigned | Unassigned | Unassigned | 447_0  | Clustered           | 3 VC_447_0   | 3   | 0.8268 | 0.99509929 | 0.8227 | 0 | 0 | 0 | 1      | Ref |
| KX610764 | Unassigned | Unassigned | Unassigned | 520_83 | Clustered/Singleton | 1 VC_520_83  | 1   | 0      | 1          | 0      | 0 | 0 | 0 | 1      | Ref |
| KX610765 | Unassigned | Unassigned | Unassigned | 950_0  | Clustered           | 38 VC_950_0  | 38  | 0.9443 | 1          | 0.9443 | 0 | 0 | 0 | 1      | Ref |
| KX611788 | Unassigned | Unassigned | Unassigned | 956_0  | Clustered           | 39 VC_956_0  | 39  | 1      | 1          | 1      | 0 | 0 | 0 | 1      | Ref |
| KX611831 | Unassigned | Unassigned | Unassigned | 551_6  | Clustered           | 22 VC_551_6  | 22  | 0.1214 | 1          | 0.1214 | 0 | 0 | 0 | 0.8095 | Ref |
| KX619650 | Unassigned | Unassigned | Unassigned | 216_6  | Clustered           | 42 VC_216_6  | 42  | 0.473  | 1          | 0.473  | 0 | 0 | 0 | 0.8351 | Ref |
| KX619651 | Unassigned | Unassigned | Unassigned | 517_1  | Clustered           | 108 VC_517_1 | 108 | 0.8483 | 1          | 0.8483 | 0 | 0 | 0 | 0.9955 | Ref |
| KX620750 | Unassigned | Unassigned | Unassigned | 1186_0 | Clustered           | 4 VC_1186_0  | 4   | 0.4582 | 0.99991945 | 0.4582 | 0 | 0 | 0 | 1      | Ref |
| KX620751 | Unassigned | Unassigned | Unassigned | 1186_0 | Clustered           | 4 VC_1186_0  | 4   | 0.4582 | 0.99991945 | 0.4582 | 0 | 0 | 0 | 1      | Ref |
| KX620753 | Unassigned | Unassigned | Unassigned | 1186_0 | Clustered           | 4 VC_1186_0  | 4   | 0.4582 | 0.99991945 | 0.4582 | 0 | 0 | 0 | 1      | Ref |
| KX620754 | Unassigned | Unassigned | Unassigned | 1186_0 | Clustered           | 4 VC_1186_0  | 4   | 0.4582 | 0.99991945 | 0.4582 | 0 | 0 | 0 | 1      | Ref |
| KX620786 | Unassigned | Unassigned | Unassigned | 371_16 | Clustered           | 42 VC_371_16 | 42  | 0.1341 | 1          | 0.1341 | 0 | 0 | 0 | 0.7282 | Ref |
| KX621004 | Unassigned | Unassigned | Unassigned | 1160_0 | Clustered           | 73 VC_1160_0 | 73  | 0.9835 | 1          | 0.9835 | 0 | 0 | 0 | 1      | Ref |
| KX621005 | Unassigned | Unassigned | Unassigned | 1160_0 | Clustered           | 73 VC_1160_0 | 73  | 0.9835 | 1          | 0.9835 | 0 | 0 | 0 | 1      | Ref |
| KX621007 | Unassigned | Unassigned | Unassigned | 234_0  | Clustered           | 21 VC_234_0  | 21  | 0.8355 | 1          | 0.8355 | 0 | 0 | 0 | 1      | Ref |
| KX636165 | Unassigned | Unassigned | Unassigned | 238_0  | Clustered           | 17 VC_238_0  | 17  | 0.6109 | 1          | 0.6109 | 0 | 0 | 0 | 1      | Ref |
| KX640831 | Unassigned | Unassigned | Unassigned | 513_0  | Clustered           | 32 VC_513_0  | 32  | 0.6881 | 1          | 0.6881 | 0 | 0 | 0 | 1      | Ref |
| KX641260 | Unassigned | Unassigned | Unassigned | 517_0  | Clustered           | 18 VC_517_0  | 18  | 0.1599 | 1          | 0.1599 | 0 | 0 | 0 | 1      | Ref |
| KX641261 | Unassigned | Unassigned | Unassigned | 223_0  | Clustered           | 38 VC_223_0  | 38  | 0.9095 | 1          | 0.9095 | 0 | 0 | 0 | 1      | Ref |
| KX641262 | Unassigned | Unassigned | Unassigned | 519_0  | Clustered           | 39 VC_519_0  | 39  | 0.8156 | 1          | 0.8156 | 0 | 0 | 0 | 1      | Ref |
| KX641263 | Unassigned | Unassigned | Unassigned | 216_3  | Clustered           | 8 VC_216_3   | 8   | 0.0701 | 1          | 0.0701 | 0 | 0 | 0 | 0.8571 | Ref |
| KX641264 | Unassigned | Unassigned | Unassigned | 236_0  | Clustered           | 72 VC_236_0  | 72  | 0.8104 | 1          | 0.8104 | 0 | 0 | 0 | 1      | Ref |
| KX641265 | Unassigned | Unassigned | Unassigned | 761_0  | Clustered           | 67 VC_761_0  | 67  | 0.8947 | 1          | 0.8947 | 0 | 0 | 0 | 1      | Ref |
| KX641266 | Unassigned | Unassigned | Unassigned | 761_0  | Clustered           | 67 VC_761_0  | 67  | 0.8947 | 1          | 0.8947 | 0 | 0 | 0 | 1      | Ref |
| KX648373 | Unassigned | Unassigned | Unassigned | 517_1  | Clustered           | 108 VC_517_1 | 108 | 0.8483 | 1          | 0.8483 | 0 | 0 | 0 | 0.9955 | Ref |
| KX649889 | Unassigned | Unassigned | Unassigned | 637_0  | Clustered           | 115 VC_637_0 | 115 | 0.731  | 1          | 0.731  | 0 | 0 | 0 | 0.8764 | Ref |
| KX656785 | Unassigned | Unassigned | Unassigned | 687_0  | Clustered           | 3 VC_687_0   | 3   | 0.5872 | 0.99252665 | 0.5828 | 0 | 0 | 0 | 1      | Ref |
| KX657793 | Unassigned | Unassigned | Unassigned | 222_0  | Clustered           | 5 VC_222_0   | 5   | 0.0565 | 0.99999997 | 0.0565 | 0 | 0 | 0 | 1      | Ref |
| KX657794 | Unassigned | Unassigned | Unassigned | 236_0  | Clustered           | 72 VC_236_0  | 72  | 0.8104 | 1          | 0.8104 | 0 | 0 | 0 | 1      | Ref |
| KX657795 | Unassigned | Unassigned | Unassigned | 236_0  | Clustered           | 72 VC_236_0  | 72  | 0.8104 | 1          | 0.8104 | 0 | 0 | 0 | 1      | Ref |
| KX657796 | Unassigned | Unassigned | Unassigned | 236_0  | Clustered           | 72 VC_236_0  | 72  | 0.8104 | 1          | 0.8104 | 0 | 0 | 0 | 1      | Ref |
| KX660669 | Unassigned | Unassigned | Unassigned | 70_0   | Clustered           | 27 VC_70_0   | 27  | 0.5981 | 1          | 0.5981 | 0 | 0 | 0 | 0.9886 | Ref |
| KX664447 | Unassigned | Unassigned | Unassigned | 225_0  | Clustered           | 32 VC_225_0  | 32  | 0.848  | 1          | 0.848  | 0 | 0 | 0 | 0.996  | Ref |
| KX664448 | Unassigned | Unassigned | Unassigned | 514_0  | Clustered           | 75 VC_514_0  | 75  | 0.9402 | 1          | 0.9402 | 0 | 0 | 0 | 1      | Ref |
| KX664455 | Unassigned | Unassigned | Unassigned | 761_0  | Clustered           | 67 VC_761_0  | 67  | 0.8947 | 1          | 0.8947 | 0 | 0 | 0 | 1      | Ref |
| KX664695 | Unassigned | Unassigned | Unassigned | 847_1  | Clustered           | 26 VC_847_1  | 26  | 0.6323 | 1          | 0.6323 | 0 | 0 | 0 | 0.9815 | Ref |
| KX669227 | Unassigned | Unassigned | Unassigned | 451_0  | Clustered           | 80 VC_451_0  | 80  | 0.9991 | 1          | 0.9991 | 0 | 0 | 0 | 1      | Ref |
| KX670786 | Unassigned | Unassigned | Unassigned | 1074_0 | Clustered           | 19 VC_1074_0 | 19  | 0.9198 | 1          | 0.9198 | 0 | 0 | 0 | 1      | Ref |
| KX670787 | Unassigned | Unassigned | Unassigned | 1074_0 | Clustered           | 19 VC_1074_0 | 19  | 0.9198 | 1          | 0.9198 | 0 | 0 | 0 | 1      | Ref |
| KX670788 | Unassigned | Unassigned | Unassigned | 514_0  | Clustered           | 75 VC_514_0  | 75  | 0.9402 | 1          | 0.9402 | 0 | 0 | 0 | 1      | Ref |
| KX670789 | Unassigned | Unassigned | Unassigned | 872_0  | Clustered           | 31 VC_872_0  | 31  | 0.8151 | 1          | 0.8151 | 0 | 0 | 0 | 0.8194 | Ref |
| KX670790 | Unassigned | Unassigned | Unassigned | 872_0  | Clustered           | 31 VC_872_0  | 31  | 0.8151 | 1          | 0.8151 | 0 | 0 | 0 | 0.8194 | Ref |
| KX670813 | Unassigned | Unassigned | Unassigned | 371_15 | Clustered           | 44 VC_371_15 | 44  | 0.1391 | 1          | 0.1391 | 0 | 0 | 0 | 0.7474 | Ref |
| KX670828 | Unassigned | Unassigned | Unassigned | 513_0  | Clustered           | 32 VC_513_0  | 32  | 0.6881 | 1          | 0.6881 | 0 | 0 | 0 | 1      | Ref |
| KX683292 | Unassigned | Unassigned | Unassigned | 371_15 | Clustered           | 44 VC_371_15 | 44  | 0.1391 | 1          | 0.1391 | 0 | 0 | 0 | 0.7474 | Ref |
| KX683293 | Unassigned | Unassigned | Unassigned | 371_15 | Clustered           | 44 VC_371_15 | 44  | 0.1391 | 1          | 0.1391 | 0 | 0 | 0 | 0.7474 | Ref |
| KX683423 | Unassigned | Unassigned | Unassigned | 513_0  | Clustered           | 32 VC_513_0  | 32  | 0.6881 | 1          | 0.6881 | 0 | 0 | 0 | 1      | Ref |
| KX683428 | Unassigned | Unassigned | Unassigned | 237_1  | Clustered           | 13 VC_237_1  | 13  | 0.1773 | 1          | 0.1773 | 0 | 0 | 0 | 0.7308 | Ref |
| KX683875 | Unassigned | Unassigned | Unassigned | 216_4  | Clustered           | 13 VC_216_4  | 13  | 0.1657 | 1          | 0.1657 | 0 | 0 | 0 | 1      | Ref |



|          |            |            |            |        |                     |              |     |        |            |        |   |   |   |        |     |
|----------|------------|------------|------------|--------|---------------------|--------------|-----|--------|------------|--------|---|---|---|--------|-----|
| KX683876 | Unassigned | Unassigned | Unassigned | 325_38 | Clustered           | 6 VC_325_38  | 6   | 0.0267 | 1          | 0.0267 | 0 | 0 | 0 | 0.8    | Ref |
| KX685355 | Unassigned | Unassigned | Unassigned | 225_0  | Clustered           | 32 VC_225_0  | 32  | 0.848  | 1          | 0.848  | 0 | 0 | 0 | 0.996  | Ref |
| KX688102 | Unassigned | Unassigned | Unassigned | 1160_0 | Clustered           | 73 VC_1160_0 | 73  | 0.9835 | 1          | 0.9835 | 0 | 0 | 0 | 1      | Ref |
| KX688103 | Unassigned | Unassigned | Unassigned | 1160_0 | Clustered           | 73 VC_1160_0 | 73  | 0.9835 | 1          | 0.9835 | 0 | 0 | 0 | 1      | Ref |
| KX689784 | Unassigned | Unassigned | Unassigned | 451_0  | Clustered           | 80 VC_451_0  | 80  | 0.9991 | 1          | 0.9991 | 0 | 0 | 0 | 1      | Ref |
| KX702319 | Unassigned | Unassigned | Unassigned | 371_13 | Clustered           | 33 VC_371_13 | 33  | 0.179  | 1          | 0.179  | 0 | 0 | 0 | 0.8769 | Ref |
| KX702320 | Unassigned | Unassigned | Unassigned | 325_38 | Clustered           | 6 VC_325_38  | 6   | 0.0267 | 1          | 0.0267 | 0 | 0 | 0 | 0.8    | Ref |
| KX711710 | Unassigned | Unassigned | Unassigned | 423_0  | Clustered           | 45 VC_423_0  | 45  | 0.9484 | 1          | 0.9484 | 0 | 0 | 0 | 1      | Ref |
| KX712070 | Unassigned | Unassigned | Unassigned | 823_0  | Clustered           | 124 VC_823_0 | 124 | 0.9492 | 1          | 0.9492 | 0 | 0 | 0 | 1      | Ref |
| KX712071 | Unassigned | Unassigned | Unassigned | 823_0  | Clustered           | 124 VC_823_0 | 124 | 0.9492 | 1          | 0.9492 | 0 | 0 | 0 | 1      | Ref |
| KX712143 | Unassigned | Unassigned | Unassigned | 348_0  | Clustered           | 22 VC_348_0  | 22  | 0.9602 | 1          | 0.9602 | 0 | 0 | 0 | 1      | Ref |
| KX712236 | Unassigned | Unassigned | Unassigned | 956_0  | Clustered           | 39 VC_956_0  | 39  | 1      | 1          | 1      | 0 | 0 | 0 | 1      | Ref |
| KX712237 | Unassigned | Unassigned | Unassigned | 956_0  | Clustered           | 39 VC_956_0  | 39  | 1      | 1          | 1      | 0 | 0 | 0 | 1      | Ref |
| KX712238 | Unassigned | Unassigned | Unassigned | 325_43 | Clustered/Singleton | 1 VC_325_43  | 1   | 0      | 1          | 0      | 0 | 0 | 0 | 1      | Ref |
| KX721255 | Unassigned | Unassigned | Unassigned | 558_49 | Clustered           | 7 VC_558_49  | 7   | 0.0194 | 0.99510369 | 0.0193 | 0 | 0 | 0 | 0.8571 | Ref |
| KX721256 | Unassigned | Unassigned | Unassigned | 558_48 | Clustered           | 2 VC_558_48  | 2   | 0.0032 | 0.69466126 | 0.0022 | 0 | 0 | 0 | 1      | Ref |
| KX752698 | Unassigned | Unassigned | Unassigned | 558_81 | Clustered/Singleton | 1 VC_558_81  | 1   | 0      | 1          | 0      | 0 | 0 | 0 | 1      | Ref |
| KX756439 | Unassigned | Unassigned | Unassigned | 521_0  | Clustered           | 37 VC_521_0  | 37  | 0.912  | 1          | 0.912  | 0 | 0 | 0 | 1      | Ref |
| KX756572 | Unassigned | Unassigned | Unassigned | 878_0  | Clustered           | 32 VC_878_0  | 32  | 0.9965 | 1          | 0.9965 | 0 | 0 | 0 | 1      | Ref |
| KX758538 | Unassigned | Unassigned | Unassigned | 215_1  | Clustered           | 19 VC_215_1  | 19  | 0.4188 | 1          | 0.4188 | 0 | 0 | 0 | 1      | Ref |
| KX758539 | Unassigned | Unassigned | Unassigned | 217_0  | Clustered           | 5 VC_217_0   | 5   | 0.069  | 0.99999998 | 0.069  | 0 | 0 | 0 | 1      | Ref |
| KX765862 | Unassigned | Unassigned | Unassigned | 592_0  | Clustered           | 50 VC_592_0  | 50  | 0.7314 | 1          | 0.7314 | 0 | 0 | 0 | 1      | Ref |
| KX765863 | Unassigned | Unassigned | Unassigned | 592_0  | Clustered           | 50 VC_592_0  | 50  | 0.7314 | 1          | 0.7314 | 0 | 0 | 0 | 1      | Ref |
| KX765864 | Unassigned | Unassigned | Unassigned | 592_0  | Clustered           | 50 VC_592_0  | 50  | 0.7314 | 1          | 0.7314 | 0 | 0 | 0 | 1      | Ref |
| KX765865 | Unassigned | Unassigned | Unassigned | 133_15 | Clustered           | 2 VC_133_15  | 2   | 0.0051 | 0.84786437 | 0.0044 | 0 | 0 | 0 | 1      | Ref |
| KX774321 | Unassigned | Unassigned | Unassigned | 1070_1 | Clustered/Singleton | 1 VC_1070_1  | 1   | 0      | 1          | 0      | 0 | 0 | 0 | 1      | Ref |
| KX774374 | Unassigned | Unassigned | Unassigned | 5_0    | Clustered           | 30 VC_5_0    | 30  | 0.9647 | 1          | 0.9647 | 0 | 0 | 0 | 1      | Ref |
| KX776161 | Unassigned | Unassigned | Unassigned | 28_1   | Clustered           | 53 VC_28_1   | 53  | 0.7164 | 1          | 0.7164 | 0 | 0 | 0 | 0.9325 | Ref |
| KX778611 | Unassigned | Unassigned | Unassigned | 385_0  | Clustered           | 51 VC_385_0  | 51  | 0.8754 | 1          | 0.8754 | 0 | 0 | 0 | 1      | Ref |
| KX781992 | Unassigned | Unassigned | Unassigned | 558_9  | Clustered           | 3 VC_558_9   | 3   | 0.0064 | 0.82911529 | 0.0053 | 0 | 0 | 0 | 0.6667 | Ref |
| KX808129 | Unassigned | Unassigned | Unassigned | 514_0  | Clustered           | 75 VC_514_0  | 75  | 0.9402 | 1          | 0.9402 | 0 | 0 | 0 | 1      | Ref |
| KX808130 | Unassigned | Unassigned | Unassigned | 517_1  | Clustered           | 108 VC_517_1 | 108 | 0.8483 | 1          | 0.8483 | 0 | 0 | 0 | 0.9955 | Ref |
| KX808131 | Unassigned | Unassigned | Unassigned | 520_16 | Clustered/Singleton | 1 VC_520_16  | 1   | 0      | 1          | 0      | 0 | 0 | 0 | 1      | Ref |
| KX815338 | Unassigned | Unassigned | Unassigned | 982_0  | Clustered           | 62 VC_982_0  | 62  | 0.8646 | 1          | 0.8646 | 0 | 0 | 0 | 0.743  | Ref |
| KX817173 | Unassigned | Unassigned | Unassigned | 551_2  | Clustered           | 17 VC_551_2  | 17  | 0.0973 | 1          | 0.0973 | 0 | 0 | 0 | 0.9779 | Ref |
| KX817174 | Unassigned | Unassigned | Unassigned | 517_1  | Clustered           | 108 VC_517_1 | 108 | 0.8483 | 1          | 0.8483 | 0 | 0 | 0 | 0.9955 | Ref |
| KX817175 | Unassigned | Unassigned | Unassigned | 517_1  | Clustered           | 108 VC_517_1 | 108 | 0.8483 | 1          | 0.8483 | 0 | 0 | 0 | 0.9955 | Ref |
| KX822733 | Unassigned | Unassigned | Unassigned | 496_3  | Clustered/Singleton | 1 VC_496_3   | 1   | 0      | 1          | 0      | 0 | 0 | 0 | 1      | Ref |
| KX826077 | Unassigned | Unassigned | Unassigned | 428_0  | Clustered           | 33 VC_428_0  | 33  | 0.9915 | 1          | 0.9915 | 0 | 0 | 0 | 1      | Ref |
| KX827368 | Unassigned | Unassigned | Unassigned | 11_0   | Clustered           | 19 VC_11_0   | 19  | 0.7562 | 1          | 0.7562 | 0 | 0 | 0 | 1      | Ref |
| KX827369 | Unassigned | Unassigned | Unassigned | 11_0   | Clustered           | 19 VC_11_0   | 19  | 0.7562 | 1          | 0.7562 | 0 | 0 | 0 | 1      | Ref |
| KX827370 | Unassigned | Unassigned | Unassigned | 11_0   | Clustered           | 19 VC_11_0   | 19  | 0.7562 | 1          | 0.7562 | 0 | 0 | 0 | 1      | Ref |
| KX827371 | Unassigned | Unassigned | Unassigned | 15_0   | Clustered           | 3 VC_15_0    | 3   | 0.0481 | 0.9985346  | 0.048  | 0 | 0 | 0 | 1      | Ref |
| KX828710 | Unassigned | Unassigned | Unassigned | 575_0  | Clustered           | 35 VC_575_0  | 35  | 0.8815 | 1          | 0.8815 | 0 | 0 | 0 | 1      | Ref |
| KX828711 | Unassigned | Unassigned | Unassigned | 283_85 | Clustered/Singleton | 1 VC_283_85  | 1   | 0      | 1          | 0      | 0 | 0 | 0 | 1      | Ref |
| KX831080 | Unassigned | Unassigned | Unassigned | 558_82 | Clustered           | 3 VC_558_82  | 3   | 0.0064 | 0.88433874 | 0.0057 | 0 | 0 | 0 | 0.6667 | Ref |
| KX833211 | Unassigned | Unassigned | Unassigned | 228_0  | Clustered           | 60 VC_228_0  | 60  | 0.942  | 1          | 0.942  | 0 | 0 | 0 | 1      | Ref |
| KX834009 | Unassigned | Unassigned | Unassigned | 551_6  | Clustered           | 22 VC_551_6  | 22  | 0.1214 | 1          | 0.1214 | 0 | 0 | 0 | 0.8095 | Ref |
| KX845404 | Unassigned | Unassigned | Unassigned | 192_0  | Clustered           | 15 VC_192_0  | 15  | 0.5071 | 1          | 0.5071 | 0 | 0 | 0 | 1      | Ref |
| KX855961 | Unassigned | Unassigned | Unassigned | 1074_0 | Clustered           | 19 VC_1074_0 | 19  | 0.9198 | 1          | 0.9198 | 0 | 0 | 0 | 1      | Ref |
| KX855962 | Unassigned | Unassigned | Unassigned | 1074_0 | Clustered           | 19 VC_1074_0 | 19  | 0.9198 | 1          | 0.9198 | 0 | 0 | 0 | 1      | Ref |
| KX856662 | Unassigned | Unassigned | Unassigned | 111_0  | Clustered           | 91 VC_111_0  | 91  | 0.9587 | 1          | 0.9587 | 0 | 0 | 0 | 1      | Ref |
| KX879601 | Unassigned | Unassigned | Unassigned | 730_0  | Clustered           | 9 VC_730_0   | 9   | 1      | 1          | 1      | 0 | 0 | 0 | 1      | Ref |
| KX879602 | Unassigned | Unassigned | Unassigned | 730_0  | Clustered           | 9 VC_730_0   | 9   | 1      | 1          | 1      | 0 | 0 | 0 | 1      | Ref |
| KX879627 | Unassigned | Unassigned | Unassigned | 844_0  | Clustered           | 27 VC_844_0  | 27  | 0.9385 | 1          | 0.9385 | 0 | 0 | 0 | 1      | Ref |
| KX879641 | Unassigned | Unassigned | Unassigned | 256_0  | Clustered           | 14 VC_256_0  | 14  | 0.2368 | 1          | 0.2368 | 0 | 0 | 0 | 1      | Ref |
| KX879642 | Unassigned | Unassigned | Unassigned | 256_0  | Clustered           | 14 VC_256_0  | 14  | 0.2368 | 1          | 0.2368 | 0 | 0 | 0 | 1      | Ref |
| KX879643 | Unassigned | Unassigned | Unassigned | 255_0  | Clustered           | 13 VC_255_0  | 13  | 0.2048 | 1          | 0.2048 | 0 | 0 | 0 | 1      | Ref |
| KX889068 | Unassigned | Unassigned | Unassigned | 930_0  | Clustered           | 7 VC_930_0   | 7   | 0.519  | 1          | 0.519  | 0 | 0 | 0 | 1      | Ref |
| KX897981 | Unassigned | Unassigned | Unassigned | 215_1  | Clustered           | 19 VC_215_1  | 19  | 0.4188 | 1          | 0.4188 | 0 | 0 | 0 | 1      | Ref |
| KX898399 | Unassigned | Unassigned | Unassigned | 465_0  | Clustered           | 7 VC_465_0   | 7   | 0.3322 | 1          | 0.3322 | 0 | 0 | 0 | 1      | Ref |
| KX898400 | Unassigned | Unassigned | Unassigned | 465_0  | Clustered           | 7 VC_465_0   | 7   | 0.3322 | 1          | 0.3322 | 0 | 0 | 0 | 1      | Ref |
| KX912252 | Unassigned | Unassigned | Unassigned | 896_0  | Clustered           | 5 VC_896_0   | 5   | 0.4981 | 0.99999977 | 0.4981 | 0 | 0 | 0 | 1      | Ref |
| KX925554 | Unassigned | Unassigned | Unassigned | 960_1  | Clustered/Singleton | 1 VC_960_1   | 1   | 0      | 1          | 0      | 0 | 0 | 0 | 1      | Ref |
| KX961385 | Unassigned | Unassigned | Unassigned | 166_0  | Clustered           | 26 VC_166_0  | 26  | 0.7923 | 1          | 0.7923 | 0 | 0 | 0 | 1      | Ref |
| KX961629 | Unassigned | Unassigned | Unassigned | 884_0  | Clustered           | 28 VC_884_0  | 28  | 0.6211 | 1          | 0.6211 | 0 | 0 | 0 | 0.9841 | Ref |
| KX961630 | Unassigned | Unassigned | Unassigned | 187_0  | Clustered           | 4 VC_187_0   | 4   | 0.0661 | 0.99994098 | 0.0661 | 0 | 0 | 0 | 1      | Ref |
| KX961631 | Unassigned | Unassigned | Unassigned | 818_0  | Clustered           | 20 VC_818_0  | 20  | 0.9601 | 1          | 0.9601 | 0 | 0 | 0 | 1      | Ref |
| KX961632 | Unassigned | Unassigned | Unassigned | 884_0  | Clustered           | 28 VC_884_0  | 28  | 0.6211 | 1          | 0.6211 | 0 | 0 | 0 | 0.9841 | Ref |
| KX987127 | Unassigned | Unassigned | Unassigned | 805_0  | Clustered           | 4 VC_805_0   | 4   | 0.9081 | 0.99622688 | 0.9046 | 0 | 0 | 0 | 1      | Ref |
| KX987158 | Unassigned | Unassigned | Unassigned | 1049_0 | Clustered           | 8 VC_1049_0  | 8   | 0.6413 | 1          | 0.6413 | 0 | 0 | 0 | 1      | Ref |
| KX987999 | Unassigned | Unassigned | Unassigned | 187_1  | Clustered           | 7 VC_187_1   | 7   | 0.1423 | 1          | 0.1423 | 0 | 0 | 0 | 1      | Ref |
| KY000003 | Unassigned | Unassigned | Unassigned | 133_30 | Clustered           | 2 VC_133_30  | 2   | 0.0052 | 0.87738871 | 0.0046 | 0 | 0 | 0 | 1      | Ref |
| KY000079 | Unassigned | Unassigned | Unassigned | 702_0  | Clustered           | 5 VC_702_0   | 5   | 0.7794 | 0.99999988 | 0.7794 | 0 | 0 | 0 | 1      | Ref |
| KY000080 | Unassigned | Unassigned | Unassigned | 491_0  | Clustered           | 36 VC_491_0  | 36  | 0.5336 | 1          | 0.5336 | 0 | 0 | 0 | 0.9714 | Ref |
| KY000081 | Unassigned | Unassigned | Unassigned | 111_0  | Clustered           | 91 VC_111_0  | 91  | 0.9587 | 1          | 0.9587 | 0 | 0 | 0 | 1      | Ref |
| KY000082 | Unassigned | Unassigned | Unassigned | 79_11  | Clustered/Singleton | 1 VC_79_11   | 1   | 0      | 1          | 0      | 0 | 0 | 0 | 1      | Ref |
| KY000083 | Unassigned | Unassigned | Unassigned | 76_0   | Clustered           | 37 VC_76_0   | 37  | 0.9403 | 1          | 0.9403 | 0 | 0 | 0 | 1      | Ref |
| KY000084 | Unassigned | Unassigned | Unassigned | 96_0   | Clustered           | 30 VC_96_0   | 30  | 0.718  | 1          | 0.718  | 0 | 0 | 0 | 1      | Ref |
| KY000085 | Unassigned | Unassigned | Unassigned | 96_0   | Clustered           | 30 VC_96_0   | 30  | 0.718  | 1          | 0.718  | 0 | 0 | 0 | 1      | Ref |
| KY000218 | Unassigned | Unassigned | Unassigned | 166_0  | Clustered           | 26 VC_166_0  | 26  | 0.7923 | 1          | 0.7923 | 0 | 0 | 0 | 1      | Ref |



|          |            |            |            |        |                     |              |     |        |            |        |   |   |   |            |
|----------|------------|------------|------------|--------|---------------------|--------------|-----|--------|------------|--------|---|---|---|------------|
| KY000219 | Unassigned | Unassigned | Unassigned | 166_0  | Clustered           | 26 VC_166_0  | 26  | 0.7923 | 1          | 0.7923 | 0 | 0 | 0 | 1 Ref      |
| KY000220 | Unassigned | Unassigned | Unassigned | 166_0  | Clustered           | 26 VC_166_0  | 26  | 0.7923 | 1          | 0.7923 | 0 | 0 | 0 | 1 Ref      |
| KY000221 | Unassigned | Unassigned | Unassigned | 166_0  | Clustered           | 26 VC_166_0  | 26  | 0.7923 | 1          | 0.7923 | 0 | 0 | 0 | 1 Ref      |
| KY002061 | Unassigned | Unassigned | Unassigned | 1049_0 | Clustered           | 8 VC_1049_0  | 8   | 0.6413 | 1          | 0.6413 | 0 | 0 | 0 | 1 Ref      |
| KY006473 | Unassigned | Unassigned | Unassigned | 517_1  | Clustered           | 108 VC_517_1 | 108 | 0.8483 | 1          | 0.8483 | 0 | 0 | 0 | 0.9955 Ref |
| KY006474 | Unassigned | Unassigned | Unassigned | 371_1  | Clustered           | 11 VC_371_1  | 11  | 0.0379 | 1          | 0.0379 | 0 | 0 | 0 | 0.8545 Ref |
| KY006853 | Unassigned | Unassigned | Unassigned | 170_1  | Clustered/Singleton | 1 VC_170_1   | 1   | 0      | 1          | 0      | 0 | 0 | 0 | 1 Ref      |
| KY014601 | Unassigned | Unassigned | Unassigned | 592_0  | Clustered           | 50 VC_592_0  | 50  | 0.7314 | 1          | 0.7314 | 0 | 0 | 0 | 1 Ref      |
| KY022433 | Unassigned | Unassigned | Unassigned | 904_2  | Clustered           | 7 VC_904_2   | 7   | 0.2857 | 1          | 0.2857 | 0 | 0 | 0 | 1 Ref      |
| KY030782 | Unassigned | Unassigned | Unassigned | 89_2   | Clustered           | 5 VC_89_2    | 5   | 0.2033 | 0.99999643 | 0.2033 | 0 | 0 | 0 | 1 Ref      |
| KY045851 | Unassigned | Unassigned | Unassigned | 5_0    | Clustered           | 30 VC_5_0    | 30  | 0.9647 | 1          | 0.9647 | 0 | 0 | 0 | 1 Ref      |
| KY056619 | Unassigned | Unassigned | Unassigned | 879_0  | Clustered           | 36 VC_879_0  | 36  | 0.994  | 1          | 0.994  | 0 | 0 | 0 | 1 Ref      |
| KY056620 | Unassigned | Unassigned | Unassigned | 8_0    | Clustered           | 58 VC_8_0    | 58  | 0.8306 | 1          | 0.8306 | 0 | 0 | 0 | 0.9946 Ref |
| KY065147 | Unassigned | Unassigned | Unassigned | 495_1  | Clustered           | 41 VC_495_1  | 41  | 0.328  | 1          | 0.328  | 0 | 0 | 0 | 0.911 Ref  |
| KY065148 | Unassigned | Unassigned | Unassigned | 784_0  | Clustered           | 6 VC_784_0   | 6   | 0.5517 | 1          | 0.5517 | 0 | 0 | 0 | 1 Ref      |
| KY065149 | Unassigned | Unassigned | Unassigned | 989_0  | Clustered           | 2 VC_989_0   | 2   | 0.1205 | 0.95251219 | 0.1148 | 0 | 0 | 0 | 1 Ref      |
| KY065449 | Unassigned | Unassigned | Unassigned | 415_0  | Clustered/Singleton | 1 VC_415_0   | 1   | 0      | 1          | 0      | 0 | 0 | 0 | 1 Ref      |
| KY065450 | Unassigned | Unassigned | Unassigned | 414_0  | Clustered           | 37 VC_414_0  | 37  | 0.585  | 1          | 0.585  | 0 | 0 | 0 | 0.9474 Ref |
| KY065451 | Unassigned | Unassigned | Unassigned | 414_0  | Clustered           | 37 VC_414_0  | 37  | 0.585  | 1          | 0.585  | 0 | 0 | 0 | 0.9474 Ref |
| KY065452 | Unassigned | Unassigned | Unassigned | 414_0  | Clustered           | 37 VC_414_0  | 37  | 0.585  | 1          | 0.585  | 0 | 0 | 0 | 0.9474 Ref |
| KY065453 | Unassigned | Unassigned | Unassigned | 333_0  | Clustered           | 25 VC_333_0  | 25  | 0.4681 | 1          | 0.4681 | 0 | 0 | 0 | 1 Ref      |
| KY065454 | Unassigned | Unassigned | Unassigned | 333_0  | Clustered           | 25 VC_333_0  | 25  | 0.4681 | 1          | 0.4681 | 0 | 0 | 0 | 1 Ref      |
| KY065455 | Unassigned | Unassigned | Unassigned | 412_0  | Clustered           | 39 VC_412_0  | 39  | 0.845  | 1          | 0.845  | 0 | 0 | 0 | 1 Ref      |
| KY065456 | Unassigned | Unassigned | Unassigned | 414_0  | Clustered           | 37 VC_414_0  | 37  | 0.585  | 1          | 0.585  | 0 | 0 | 0 | 0.9474 Ref |
| KY065458 | Unassigned | Unassigned | Unassigned | 333_0  | Clustered           | 25 VC_333_0  | 25  | 0.4681 | 1          | 0.4681 | 0 | 0 | 0 | 1 Ref      |
| KY065459 | Unassigned | Unassigned | Unassigned | 333_0  | Clustered           | 25 VC_333_0  | 25  | 0.4681 | 1          | 0.4681 | 0 | 0 | 0 | 1 Ref      |
| KY065460 | Unassigned | Unassigned | Unassigned | 333_0  | Clustered           | 25 VC_333_0  | 25  | 0.4681 | 1          | 0.4681 | 0 | 0 | 0 | 1 Ref      |
| KY065461 | Unassigned | Unassigned | Unassigned | 333_0  | Clustered           | 25 VC_333_0  | 25  | 0.4681 | 1          | 0.4681 | 0 | 0 | 0 | 1 Ref      |
| KY065462 | Unassigned | Unassigned | Unassigned | 333_0  | Clustered           | 25 VC_333_0  | 25  | 0.4681 | 1          | 0.4681 | 0 | 0 | 0 | 1 Ref      |
| KY065463 | Unassigned | Unassigned | Unassigned | 333_0  | Clustered           | 25 VC_333_0  | 25  | 0.4681 | 1          | 0.4681 | 0 | 0 | 0 | 1 Ref      |
| KY065465 | Unassigned | Unassigned | Unassigned | 413_0  | Clustered           | 3 VC_413_0   | 3   | 0.0415 | 0.99841754 | 0.0415 | 0 | 0 | 0 | 1 Ref      |
| KY065466 | Unassigned | Unassigned | Unassigned | 318_0  | Clustered           | 3 VC_318_0   | 3   | 0.0414 | 0.98579852 | 0.0408 | 0 | 0 | 0 | 1 Ref      |
| KY065468 | Unassigned | Unassigned | Unassigned | 318_0  | Clustered           | 3 VC_318_0   | 3   | 0.0414 | 0.98579852 | 0.0408 | 0 | 0 | 0 | 1 Ref      |
| KY065469 | Unassigned | Unassigned | Unassigned | 333_0  | Clustered           | 25 VC_333_0  | 25  | 0.4681 | 1          | 0.4681 | 0 | 0 | 0 | 1 Ref      |
| KY065470 | Unassigned | Unassigned | Unassigned | 333_0  | Clustered           | 25 VC_333_0  | 25  | 0.4681 | 1          | 0.4681 | 0 | 0 | 0 | 1 Ref      |
| KY065471 | Unassigned | Unassigned | Unassigned | 333_0  | Clustered           | 25 VC_333_0  | 25  | 0.4681 | 1          | 0.4681 | 0 | 0 | 0 | 1 Ref      |
| KY065472 | Unassigned | Unassigned | Unassigned | 414_0  | Clustered           | 37 VC_414_0  | 37  | 0.585  | 1          | 0.585  | 0 | 0 | 0 | 0.9474 Ref |
| KY065473 | Unassigned | Unassigned | Unassigned | 414_0  | Clustered           | 37 VC_414_0  | 37  | 0.585  | 1          | 0.585  | 0 | 0 | 0 | 0.9474 Ref |
| KY065474 | Unassigned | Unassigned | Unassigned | 414_0  | Clustered           | 37 VC_414_0  | 37  | 0.585  | 1          | 0.585  | 0 | 0 | 0 | 0.9474 Ref |
| KY065475 | Unassigned | Unassigned | Unassigned | 414_0  | Clustered           | 37 VC_414_0  | 37  | 0.585  | 1          | 0.585  | 0 | 0 | 0 | 0.9474 Ref |
| KY065476 | Unassigned | Unassigned | Unassigned | 414_0  | Clustered           | 37 VC_414_0  | 37  | 0.585  | 1          | 0.585  | 0 | 0 | 0 | 0.9474 Ref |
| KY065477 | Unassigned | Unassigned | Unassigned | 414_0  | Clustered           | 37 VC_414_0  | 37  | 0.585  | 1          | 0.585  | 0 | 0 | 0 | 0.9474 Ref |
| KY065478 | Unassigned | Unassigned | Unassigned | 414_0  | Clustered           | 37 VC_414_0  | 37  | 0.585  | 1          | 0.585  | 0 | 0 | 0 | 0.9474 Ref |
| KY065479 | Unassigned | Unassigned | Unassigned | 412_0  | Clustered           | 39 VC_412_0  | 39  | 0.845  | 1          | 0.845  | 0 | 0 | 0 | 1 Ref      |
| KY065480 | Unassigned | Unassigned | Unassigned | 414_0  | Clustered           | 37 VC_414_0  | 37  | 0.585  | 1          | 0.585  | 0 | 0 | 0 | 0.9474 Ref |
| KY065485 | Unassigned | Unassigned | Unassigned | 317_2  | Clustered           | 20 VC_317_2  | 20  | 0.1976 | 1          | 0.1976 | 0 | 0 | 0 | 0.6842 Ref |
| KY065486 | Unassigned | Unassigned | Unassigned | 414_0  | Clustered           | 37 VC_414_0  | 37  | 0.585  | 1          | 0.585  | 0 | 0 | 0 | 0.9474 Ref |
| KY065487 | Unassigned | Unassigned | Unassigned | 412_0  | Clustered           | 39 VC_412_0  | 39  | 0.845  | 1          | 0.845  | 0 | 0 | 0 | 1 Ref      |
| KY065488 | Unassigned | Unassigned | Unassigned | 414_0  | Clustered           | 37 VC_414_0  | 37  | 0.585  | 1          | 0.585  | 0 | 0 | 0 | 0.9474 Ref |
| KY065490 | Unassigned | Unassigned | Unassigned | 412_0  | Clustered           | 39 VC_412_0  | 39  | 0.845  | 1          | 0.845  | 0 | 0 | 0 | 1 Ref      |
| KY065491 | Unassigned | Unassigned | Unassigned | 412_0  | Clustered           | 39 VC_412_0  | 39  | 0.845  | 1          | 0.845  | 0 | 0 | 0 | 1 Ref      |
| KY065492 | Unassigned | Unassigned | Unassigned | 412_0  | Clustered           | 39 VC_412_0  | 39  | 0.845  | 1          | 0.845  | 0 | 0 | 0 | 1 Ref      |
| KY065493 | Unassigned | Unassigned | Unassigned | 412_0  | Clustered           | 39 VC_412_0  | 39  | 0.845  | 1          | 0.845  | 0 | 0 | 0 | 1 Ref      |
| KY065494 | Unassigned | Unassigned | Unassigned | 333_0  | Clustered           | 25 VC_333_0  | 25  | 0.4681 | 1          | 0.4681 | 0 | 0 | 0 | 1 Ref      |
| KY065495 | Unassigned | Unassigned | Unassigned | 333_0  | Clustered           | 25 VC_333_0  | 25  | 0.4681 | 1          | 0.4681 | 0 | 0 | 0 | 1 Ref      |
| KY065496 | Unassigned | Unassigned | Unassigned | 414_0  | Clustered           | 37 VC_414_0  | 37  | 0.585  | 1          | 0.585  | 0 | 0 | 0 | 0.9474 Ref |
| KY065497 | Unassigned | Unassigned | Unassigned | 414_0  | Clustered           | 37 VC_414_0  | 37  | 0.585  | 1          | 0.585  | 0 | 0 | 0 | 0.9474 Ref |
| KY065498 | Unassigned | Unassigned | Unassigned | 323_1  | Clustered           | 9 VC_323_1   | 9   | 0.1798 | 1          | 0.1798 | 0 | 0 | 0 | 0.75 Ref   |
| KY065499 | Unassigned | Unassigned | Unassigned | 333_0  | Clustered           | 25 VC_333_0  | 25  | 0.4681 | 1          | 0.4681 | 0 | 0 | 0 | 1 Ref      |
| KY065500 | Unassigned | Unassigned | Unassigned | 414_0  | Clustered           | 37 VC_414_0  | 37  | 0.585  | 1          | 0.585  | 0 | 0 | 0 | 0.9474 Ref |
| KY065501 | Unassigned | Unassigned | Unassigned | 412_0  | Clustered           | 39 VC_412_0  | 39  | 0.845  | 1          | 0.845  | 0 | 0 | 0 | 1 Ref      |
| KY065502 | Unassigned | Unassigned | Unassigned | 412_0  | Clustered           | 39 VC_412_0  | 39  | 0.845  | 1          | 0.845  | 0 | 0 | 0 | 1 Ref      |
| KY065503 | Unassigned | Unassigned | Unassigned | 317_2  | Clustered           | 20 VC_317_2  | 20  | 0.1976 | 1          | 0.1976 | 0 | 0 | 0 | 0.6842 Ref |
| KY065504 | Unassigned | Unassigned | Unassigned | 317_2  | Clustered           | 20 VC_317_2  | 20  | 0.1976 | 1          | 0.1976 | 0 | 0 | 0 | 0.6842 Ref |
| KY065505 | Unassigned | Unassigned | Unassigned | 414_0  | Clustered           | 37 VC_414_0  | 37  | 0.585  | 1          | 0.585  | 0 | 0 | 0 | 0.9474 Ref |
| KY073123 | Unassigned | Unassigned | Unassigned | 132_1  | Clustered           | 17 VC_132_1  | 17  | 0.1738 | 1          | 0.1738 | 0 | 0 | 0 | 0.9853 Ref |
| KY073228 | Unassigned | Unassigned | Unassigned | 76_0   | Clustered           | 37 VC_76_0   | 37  | 0.9403 | 1          | 0.9403 | 0 | 0 | 0 | 1 Ref      |
| KY082667 | Unassigned | Unassigned | Unassigned | 699_0  | Clustered           | 71 VC_699_0  | 71  | 0.9352 | 1          | 0.9352 | 0 | 0 | 0 | 1 Ref      |
| KY083058 | Unassigned | Unassigned | Unassigned | 517_1  | Clustered           | 108 VC_517_1 | 108 | 0.8483 | 1          | 0.8483 | 0 | 0 | 0 | 0.9955 Ref |
| KY083059 | Unassigned | Unassigned | Unassigned | 517_0  | Clustered           | 18 VC_517_0  | 18  | 0.1599 | 1          | 0.1599 | 0 | 0 | 0 | 1 Ref      |
| KY083060 | Unassigned | Unassigned | Unassigned | 517_1  | Clustered           | 108 VC_517_1 | 108 | 0.8483 | 1          | 0.8483 | 0 | 0 | 0 | 0.9955 Ref |
| KY083061 | Unassigned | Unassigned | Unassigned | 517_1  | Clustered           | 108 VC_517_1 | 108 | 0.8483 | 1          | 0.8483 | 0 | 0 | 0 | 0.9955 Ref |
| KY083062 | Unassigned | Unassigned | Unassigned | 517_1  | Clustered           | 108 VC_517_1 | 108 | 0.8483 | 1          | 0.8483 | 0 | 0 | 0 | 0.9955 Ref |
| KY083063 | Unassigned | Unassigned | Unassigned | 517_1  | Clustered           | 108 VC_517_1 | 108 | 0.8483 | 1          | 0.8483 | 0 | 0 | 0 | 0.9955 Ref |
| KY083726 | Unassigned | Unassigned | Unassigned | 841_0  | Clustered           | 10 VC_841_0  | 10  | 0.5997 | 1          | 0.5997 | 0 | 0 | 0 | 1 Ref      |
| KY084243 | Unassigned | Unassigned | Unassigned | 386_0  | Clustered           | 49 VC_386_0  | 49  | 0.7941 | 1          | 0.7941 | 0 | 0 | 0 | 1 Ref      |
| KY087898 | Unassigned | Unassigned | Unassigned | 792_0  | Clustered           | 35 VC_792_0  | 35  | 0.9828 | 1          | 0.9828 | 0 | 0 | 0 | 1 Ref      |
| KY087992 | Unassigned | Unassigned | Unassigned | 234_0  | Clustered           | 21 VC_234_0  | 21  | 0.8355 | 1          | 0.8355 | 0 | 0 | 0 | 1 Ref      |
| KY087993 | Unassigned | Unassigned | Unassigned | 237_1  | Clustered           | 13 VC_237_1  | 13  | 0.1773 | 1          | 0.1773 | 0 | 0 | 0 | 0.7308 Ref |
| KY092479 | Unassigned | Unassigned | Unassigned | 727_0  | Clustered           | 11 VC_727_0  | 11  | 0.5054 | 1          | 0.5054 | 0 | 0 | 0 | 1 Ref      |
| KY092480 | Unassigned | Unassigned | Unassigned | 727_0  | Clustered           | 11 VC_727_0  | 11  | 0.5054 | 1          | 0.5054 | 0 | 0 | 0 | 1 Ref      |



|          |            |            |            |         |                     |              |     |        |            |        |   |   |   |            |
|----------|------------|------------|------------|---------|---------------------|--------------|-----|--------|------------|--------|---|---|---|------------|
| KY092481 | Unassigned | Unassigned | Unassigned | 727_0   | Clustered           | 11 VC_727_0  | 11  | 0.5054 | 1          | 0.5054 | 0 | 0 | 0 | 1 Ref      |
| KY092482 | Unassigned | Unassigned | Unassigned | 727_0   | Clustered           | 11 VC_727_0  | 11  | 0.5054 | 1          | 0.5054 | 0 | 0 | 0 | 1 Ref      |
| KY092483 | Unassigned | Unassigned | Unassigned | 727_0   | Clustered           | 11 VC_727_0  | 11  | 0.5054 | 1          | 0.5054 | 0 | 0 | 0 | 1 Ref      |
| KY092484 | Unassigned | Unassigned | Unassigned | 727_0   | Clustered           | 11 VC_727_0  | 11  | 0.5054 | 1          | 0.5054 | 0 | 0 | 0 | 1 Ref      |
| KY114934 | Unassigned | Unassigned | Unassigned | 190_21  | Clustered/Singleton | 1 VC_190_21  | 1   | 0      | 1          | 0      | 0 | 0 | 0 | 1 Ref      |
| KY117485 | Unassigned | Unassigned | Unassigned | 154_0   | Clustered           | 4 VC_154_0   | 4   | 0.1766 | 0.99995106 | 0.1766 | 0 | 0 | 0 | 1 Ref      |
| KY130461 | Unassigned | Unassigned | Unassigned | 507_0   | Clustered           | 8 VC_507_0   | 8   | 0.4466 | 1          | 0.4466 | 0 | 0 | 0 | 1 Ref      |
| KY176369 | Unassigned | Unassigned | Unassigned | 637_1   | Clustered           | 27 VC_637_1  | 27  | 0.2578 | 1          | 0.2578 | 0 | 0 | 0 | 0.9858 Ref |
| KY203335 | Unassigned | Unassigned | Unassigned | 409_0   | Clustered           | 3 VC_409_0   | 3   | 0.1496 | 0.98294101 | 0.147  | 0 | 0 | 0 | 1 Ref      |
| KY204244 | Unassigned | Unassigned | Unassigned | 517_1   | Clustered           | 108 VC_517_1 | 108 | 0.8483 | 1          | 0.8483 | 0 | 0 | 0 | 0.9955 Ref |
| KY204245 | Unassigned | Unassigned | Unassigned | 517_1   | Clustered           | 108 VC_517_1 | 108 | 0.8483 | 1          | 0.8483 | 0 | 0 | 0 | 0.9955 Ref |
| KY204246 | Unassigned | Unassigned | Unassigned | 517_1   | Clustered           | 108 VC_517_1 | 108 | 0.8483 | 1          | 0.8483 | 0 | 0 | 0 | 0.9955 Ref |
| KY204247 | Unassigned | Unassigned | Unassigned | 517_1   | Clustered           | 108 VC_517_1 | 108 | 0.8483 | 1          | 0.8483 | 0 | 0 | 0 | 0.9955 Ref |
| KY204248 | Unassigned | Unassigned | Unassigned | 517_1   | Clustered           | 108 VC_517_1 | 108 | 0.8483 | 1          | 0.8483 | 0 | 0 | 0 | 0.9955 Ref |
| KY204249 | Unassigned | Unassigned | Unassigned | 517_1   | Clustered           | 108 VC_517_1 | 108 | 0.8483 | 1          | 0.8483 | 0 | 0 | 0 | 0.9955 Ref |
| KY204250 | Unassigned | Unassigned | Unassigned | 517_1   | Clustered           | 108 VC_517_1 | 108 | 0.8483 | 1          | 0.8483 | 0 | 0 | 0 | 0.9955 Ref |
| KY204251 | Unassigned | Unassigned | Unassigned | 517_1   | Clustered           | 108 VC_517_1 | 108 | 0.8483 | 1          | 0.8483 | 0 | 0 | 0 | 0.9955 Ref |
| KY206887 | Unassigned | Unassigned | Unassigned | 1022_0  | Clustered           | 4 VC_1022_0  | 4   | 0.8047 | 0.99996089 | 0.8046 | 0 | 0 | 0 | 1 Ref      |
| KY210139 | Unassigned | Unassigned | Unassigned | 364_0   | Clustered           | 16 VC_364_0  | 16  | 0.6491 | 1          | 0.6491 | 0 | 0 | 0 | 1 Ref      |
| KY213952 | Unassigned | Unassigned | Unassigned | 325_48  | Clustered           | 2 VC_325_48  | 2   | 0.0039 | 0.95008941 | 0.0037 | 0 | 0 | 0 | 1 Ref      |
| KY223999 | Unassigned | Unassigned | Unassigned | 763_2   | Clustered           | 7 VC_763_2   | 7   | 0.2612 | 1          | 0.2612 | 0 | 0 | 0 | 1 Ref      |
| KY224000 | Unassigned | Unassigned | Unassigned | 372_1   | Clustered           | 9 VC_372_1   | 9   | 0.194  | 1          | 0.194  | 0 | 0 | 0 | 1 Ref      |
| KY224001 | Unassigned | Unassigned | Unassigned | 325_54  | Clustered/Singleton | 1 VC_325_54  | 1   | 0      | 1          | 0      | 0 | 0 | 0 | 1 Ref      |
| KY249644 | Unassigned | Unassigned | Unassigned | 598_0   | Clustered           | 4 VC_598_0   | 4   | 0.0597 | 0.99355358 | 0.0593 | 0 | 0 | 0 | 1 Ref      |
| KY250482 | Unassigned | Unassigned | Unassigned | 409_0   | Clustered           | 3 VC_409_0   | 3   | 0.1496 | 0.98294101 | 0.147  | 0 | 0 | 0 | 1 Ref      |
| KY264020 | Unassigned | Unassigned | Unassigned | 961_0   | Clustered           | 3 VC_961_0   | 3   | 0.675  | 0.99054823 | 0.6686 | 0 | 0 | 0 | 1 Ref      |
| KY268295 | Unassigned | Unassigned | Unassigned | 699_0   | Clustered           | 71 VC_699_0  | 71  | 0.9352 | 1          | 0.9352 | 0 | 0 | 0 | 1 Ref      |
| KY268296 | Unassigned | Unassigned | Unassigned | 699_0   | Clustered           | 71 VC_699_0  | 71  | 0.9352 | 1          | 0.9352 | 0 | 0 | 0 | 1 Ref      |
| KY271395 | Unassigned | Unassigned | Unassigned | 31_0    | Clustered           | 9 VC_31_0    | 9   | 0.3435 | 1          | 0.3435 | 0 | 0 | 0 | 0.6944 Ref |
| KY271396 | Unassigned | Unassigned | Unassigned | 31_0    | Clustered           | 9 VC_31_0    | 9   | 0.3435 | 1          | 0.3435 | 0 | 0 | 0 | 0.6944 Ref |
| KY271397 | Unassigned | Unassigned | Unassigned | 229_0   | Clustered           | 32 VC_229_0  | 32  | 0.9119 | 1          | 0.9119 | 0 | 0 | 0 | 1 Ref      |
| KY271398 | Unassigned | Unassigned | Unassigned | 6_0     | Clustered           | 44 VC_6_0    | 44  | 0.908  | 1          | 0.908  | 0 | 0 | 0 | 1 Ref      |
| KY271399 | Unassigned | Unassigned | Unassigned | 35_0    | Clustered           | 6 VC_35_0    | 6   | 0.2254 | 1          | 0.2254 | 0 | 0 | 0 | 0.9333 Ref |
| KY271401 | Unassigned | Unassigned | Unassigned | 244_0   | Clustered           | 12 VC_244_0  | 12  | 0.4039 | 1          | 0.4039 | 0 | 0 | 0 | 1 Ref      |
| KY271402 | Unassigned | Unassigned | Unassigned | 34_0    | Clustered           | 4 VC_34_0    | 4   | 0.4349 | 0.99998062 | 0.4349 | 0 | 0 | 0 | 1 Ref      |
| KY290756 | Unassigned | Unassigned | Unassigned | 1027_0  | Clustered           | 20 VC_1027_0 | 20  | 0.7114 | 1          | 0.7114 | 0 | 0 | 0 | 1 Ref      |
| KY290947 | Unassigned | Unassigned | Unassigned | 1189_0  | Clustered           | 9 VC_1189_0  | 9   | 0.968  | 1          | 0.968  | 0 | 0 | 0 | 1 Ref      |
| KY290948 | Unassigned | Unassigned | Unassigned | 600_1   | Clustered           | 7 VC_600_1   | 7   | 0.1837 | 0.99999997 | 0.1837 | 0 | 0 | 0 | 1 Ref      |
| KY290949 | Unassigned | Unassigned | Unassigned | 1189_0  | Clustered           | 9 VC_1189_0  | 9   | 0.968  | 1          | 0.968  | 0 | 0 | 0 | 1 Ref      |
| KY290950 | Unassigned | Unassigned | Unassigned | 1189_0  | Clustered           | 9 VC_1189_0  | 9   | 0.968  | 1          | 0.968  | 0 | 0 | 0 | 1 Ref      |
| KY290951 | Unassigned | Unassigned | Unassigned | 600_1   | Clustered           | 7 VC_600_1   | 7   | 0.1837 | 0.99999997 | 0.1837 | 0 | 0 | 0 | 1 Ref      |
| KY290952 | Unassigned | Unassigned | Unassigned | 1189_0  | Clustered           | 9 VC_1189_0  | 9   | 0.968  | 1          | 0.968  | 0 | 0 | 0 | 1 Ref      |
| KY290953 | Unassigned | Unassigned | Unassigned | 369_0   | Clustered           | 6 VC_369_0   | 6   | 0.5924 | 1          | 0.5924 | 0 | 0 | 0 | 1 Ref      |
| KY290954 | Unassigned | Unassigned | Unassigned | 369_0   | Clustered           | 6 VC_369_0   | 6   | 0.5924 | 1          | 0.5924 | 0 | 0 | 0 | 1 Ref      |
| KY290955 | Unassigned | Unassigned | Unassigned | 443_1   | Clustered           | 2 VC_443_1   | 2   | 0.0287 | 0.89347378 | 0.0257 | 0 | 0 | 0 | 1 Ref      |
| KY290956 | Unassigned | Unassigned | Unassigned | 600_1   | Clustered           | 7 VC_600_1   | 7   | 0.1837 | 0.99999997 | 0.1837 | 0 | 0 | 0 | 1 Ref      |
| KY290957 | Unassigned | Unassigned | Unassigned | 600_1   | Clustered           | 7 VC_600_1   | 7   | 0.1837 | 0.99999997 | 0.1837 | 0 | 0 | 0 | 1 Ref      |
| KY290958 | Unassigned | Unassigned | Unassigned | 600_1   | Clustered           | 7 VC_600_1   | 7   | 0.1837 | 0.99999997 | 0.1837 | 0 | 0 | 0 | 1 Ref      |
| KY290975 | Unassigned | Unassigned | Unassigned | 283_111 | Clustered/Singleton | 1 VC_283_111 | 1   | 0      | 1          | 0      | 0 | 0 | 0 | 1 Ref      |
| KY295891 | Unassigned | Unassigned | Unassigned | 452_0   | Clustered           | 66 VC_452_0  | 66  | 0.9248 | 1          | 0.9248 | 0 | 0 | 0 | 1 Ref      |
| KY295892 | Unassigned | Unassigned | Unassigned | 452_0   | Clustered           | 66 VC_452_0  | 66  | 0.9248 | 1          | 0.9248 | 0 | 0 | 0 | 1 Ref      |
| KY295893 | Unassigned | Unassigned | Unassigned | 452_0   | Clustered           | 66 VC_452_0  | 66  | 0.9248 | 1          | 0.9248 | 0 | 0 | 0 | 1 Ref      |
| KY295894 | Unassigned | Unassigned | Unassigned | 451_0   | Clustered           | 80 VC_451_0  | 80  | 0.9991 | 1          | 0.9991 | 0 | 0 | 0 | 1 Ref      |
| KY295895 | Unassigned | Unassigned | Unassigned | 638_0   | Clustered           | 45 VC_638_0  | 45  | 0.7741 | 1          | 0.7741 | 0 | 0 | 0 | 1 Ref      |
| KY295896 | Unassigned | Unassigned | Unassigned | 638_0   | Clustered           | 45 VC_638_0  | 45  | 0.7741 | 1          | 0.7741 | 0 | 0 | 0 | 1 Ref      |
| KY295897 | Unassigned | Unassigned | Unassigned | 452_0   | Clustered           | 66 VC_452_0  | 66  | 0.9248 | 1          | 0.9248 | 0 | 0 | 0 | 1 Ref      |
| KY295898 | Unassigned | Unassigned | Unassigned | 638_0   | Clustered           | 45 VC_638_0  | 45  | 0.7741 | 1          | 0.7741 | 0 | 0 | 0 | 1 Ref      |
| KY295899 | Unassigned | Unassigned | Unassigned | 452_0   | Clustered           | 66 VC_452_0  | 66  | 0.9248 | 1          | 0.9248 | 0 | 0 | 0 | 1 Ref      |
| KY296500 | Unassigned | Unassigned | Unassigned | 814_0   | Clustered           | 3 VC_814_0   | 3   | 1      | 1          | 1      | 0 | 0 | 0 | 1 Ref      |
| KY296501 | Unassigned | Unassigned | Unassigned | 814_0   | Clustered           | 3 VC_814_0   | 3   | 1      | 1          | 1      | 0 | 0 | 0 | 1 Ref      |
| KY303907 | Unassigned | Unassigned | Unassigned | 108_0   | Clustered           | 33 VC_108_0  | 33  | 0.949  | 1          | 0.949  | 0 | 0 | 0 | 1 Ref      |
| KY316062 | Unassigned | Unassigned | Unassigned | 70_0    | Clustered           | 27 VC_70_0   | 27  | 0.5981 | 1          | 0.5981 | 0 | 0 | 0 | 0.9886 Ref |
| KY318515 | Unassigned | Unassigned | Unassigned | 878_0   | Clustered           | 32 VC_878_0  | 32  | 0.9965 | 1          | 0.9965 | 0 | 0 | 0 | 1 Ref      |
| KY319168 | Unassigned | Unassigned | Unassigned | 551_2   | Clustered           | 17 VC_551_2  | 17  | 0.0973 | 1          | 0.0973 | 0 | 0 | 0 | 0.9779 Ref |
| KY348865 | Unassigned | Unassigned | Unassigned | 520_44  | Clustered/Singleton | 1 VC_520_44  | 1   | 0      | 1          | 0      | 0 | 0 | 0 | 1 Ref      |
| KY349816 | Unassigned | Unassigned | Unassigned | 412_0   | Clustered           | 39 VC_412_0  | 39  | 0.845  | 1          | 0.845  | 0 | 0 | 0 | 1 Ref      |
| KY363465 | Unassigned | Unassigned | Unassigned | 193_0   | Clustered           | 2 VC_193_0   | 2   | 0.0321 | 0.95762656 | 0.0308 | 0 | 0 | 0 | 1 Ref      |
| KY365739 | Unassigned | Unassigned | Unassigned | 975_0   | Clustered           | 11 VC_975_0  | 11  | 0.9687 | 1          | 0.9687 | 0 | 0 | 0 | 1 Ref      |
| KY368639 | Unassigned | Unassigned | Unassigned | 87_0    | Clustered           | 8 VC_87_0    | 8   | 0.5545 | 1          | 0.5545 | 0 | 0 | 0 | 1 Ref      |
| KY368640 | Unassigned | Unassigned | Unassigned | 85_4    | Clustered           | 3 VC_85_4    | 3   | 0.0294 | 0.98125255 | 0.0288 | 0 | 0 | 0 | 1 Ref      |
| KY379511 | Unassigned | Unassigned | Unassigned | 896_0   | Clustered           | 5 VC_896_0   | 5   | 0.4981 | 0.99999977 | 0.4981 | 0 | 0 | 0 | 1 Ref      |
| KY379853 | Unassigned | Unassigned | Unassigned | 637_0   | Clustered           | 115 VC_637_0 | 115 | 0.731  | 1          | 0.731  | 0 | 0 | 0 | 0.8764 Ref |
| KY380102 | Unassigned | Unassigned | Unassigned | 236_0   | Clustered           | 72 VC_236_0  | 72  | 0.8104 | 1          | 0.8104 | 0 | 0 | 0 | 1 Ref      |
| KY381600 | Unassigned | Unassigned | Unassigned | 634_1   | Clustered           | 6 VC_634_1   | 6   | 0.4228 | 1          | 0.4228 | 0 | 0 | 0 | 1 Ref      |
| KY385380 | Unassigned | Unassigned | Unassigned | 371_13  | Clustered           | 33 VC_371_13 | 33  | 0.179  | 1          | 0.179  | 0 | 0 | 0 | 0.8769 Ref |
| KY385381 | Unassigned | Unassigned | Unassigned | 764_0   | Clustered           | 4 VC_764_0   | 4   | 0.3556 | 0.99997469 | 0.3556 | 0 | 0 | 0 | 1 Ref      |
| KY385382 | Unassigned | Unassigned | Unassigned | 371_13  | Clustered           | 33 VC_371_13 | 33  | 0.179  | 1          | 0.179  | 0 | 0 | 0 | 0.8769 Ref |
| KY385383 | Unassigned | Unassigned | Unassigned | 371_13  | Clustered           | 33 VC_371_13 | 33  | 0.179  | 1          | 0.179  | 0 | 0 | 0 | 0.8769 Ref |
| KY385384 | Unassigned | Unassigned | Unassigned | 520_53  | Clustered/Singleton | 1 VC_520_53  | 1   | 0      | 1          | 0      | 0 | 0 | 0 | 1 Ref      |
| KY385423 | Unassigned | Unassigned | Unassigned | 111_0   | Clustered           | 91 VC_111_0  | 91  | 0.9587 | 1          | 0.9587 | 0 | 0 | 0 | 1 Ref      |
| KY389063 | Unassigned | Unassigned | Unassigned | 7_0     | Clustered           | 28 VC_7_0    | 28  | 0.3916 | 1          | 0.3916 | 0 | 0 | 0 | 0.9947 Ref |



|          |            |            |            |         |           |              |     |        |            |        |   |   |   |        |       |
|----------|------------|------------|------------|---------|-----------|--------------|-----|--------|------------|--------|---|---|---|--------|-------|
| KY389064 | Unassigned | Unassigned | Unassigned | 7_0     | Clustered | 28 VC_7_0    | 28  | 0.3916 | 1          | 0.3916 | 0 | 0 | 0 | 0.9947 | Ref   |
| KY389315 | Unassigned | Unassigned | Unassigned | 823_0   | Clustered | 124 VC_823_0 | 124 | 0.9492 | 1          | 0.9492 | 0 | 0 | 0 |        | 1 Ref |
| KY389316 | Unassigned | Unassigned | Unassigned | 823_0   | Clustered | 124 VC_823_0 | 124 | 0.9492 | 1          | 0.9492 | 0 | 0 | 0 |        | 1 Ref |
| KY398841 | Unassigned | Unassigned | Unassigned | 456_0   | Clustered | 62 VC_456_0  | 62  | 0.9026 | 1          | 0.9026 | 0 | 0 | 0 |        | 1 Ref |
| KY434670 | Unassigned | Unassigned | Unassigned | 950_0   | Clustered | 38 VC_950_0  | 38  | 0.9443 | 1          | 0.9443 | 0 | 0 | 0 |        | 1 Ref |
| KY435490 | Unassigned | Unassigned | Unassigned | 452_0   | Clustered | 66 VC_452_0  | 66  | 0.9248 | 1          | 0.9248 | 0 | 0 | 0 |        | 1 Ref |
| KY448244 | Unassigned | Unassigned | Unassigned | 67_0    | Clustered | 2 VC_67_0    | 2   | 0.014  | 0.69357611 | 0.0097 | 0 | 0 | 0 |        | 1 Ref |
| KY450753 | Unassigned | Unassigned | Unassigned | 823_0   | Clustered | 124 VC_823_0 | 124 | 0.9492 | 1          | 0.9492 | 0 | 0 | 0 |        | 1 Ref |
| KY464836 | Unassigned | Unassigned | Unassigned | 70_0    | Clustered | 27 VC_70_0   | 27  | 0.5981 | 1          | 0.5981 | 0 | 0 | 0 | 0.9886 | Ref   |
| KY464936 | Unassigned | Unassigned | Unassigned | 513_0   | Clustered | 32 VC_513_0  | 32  | 0.6881 | 1          | 0.6881 | 0 | 0 | 0 |        | 1 Ref |
| KY471266 | Unassigned | Unassigned | Unassigned | 517_1   | Clustered | 108 VC_517_1 | 108 | 0.8483 | 1          | 0.8483 | 0 | 0 | 0 | 0.9955 | Ref   |
| KY471267 | Unassigned | Unassigned | Unassigned | 520_27  | Clustered | 2 VC_520_27  | 2   | 0.0143 | 0.95761635 | 0.0137 | 0 | 0 | 0 |        | 1 Ref |
| KY471268 | Unassigned | Unassigned | Unassigned | 406_0   | Clustered | 11 VC_406_0  | 11  | 0.9449 | 1          | 0.9449 | 0 | 0 | 0 |        | 1 Ref |
| KY471269 | Unassigned | Unassigned | Unassigned | 406_0   | Clustered | 11 VC_406_0  | 11  | 0.9449 | 1          | 0.9449 | 0 | 0 | 0 |        | 1 Ref |
| KY471460 | Unassigned | Unassigned | Unassigned | 221_0   | Clustered | 22 VC_221_0  | 22  | 0.7447 | 1          | 0.7447 | 0 | 0 | 0 |        | 1 Ref |
| KY472224 | Unassigned | Unassigned | Unassigned | 108_0   | Clustered | 33 VC_108_0  | 33  | 0.949  | 1          | 0.949  | 0 | 0 | 0 |        | 1 Ref |
| KY514263 | Unassigned | Unassigned | Unassigned | 849_2   | Clustered | 2 VC_849_2   | 2   | 0.0246 | 0.86513761 | 0.0213 | 0 | 0 | 0 |        | 1 Ref |
| KY514264 | Unassigned | Unassigned | Unassigned | 841_0   | Clustered | 10 VC_841_0  | 10  | 0.5997 | 1          | 0.5997 | 0 | 0 | 0 |        | 1 Ref |
| KY514265 | Unassigned | Unassigned | Unassigned | 841_0   | Clustered | 10 VC_841_0  | 10  | 0.5997 | 1          | 0.5997 | 0 | 0 | 0 |        | 1 Ref |
| KY549152 | Unassigned | Unassigned | Unassigned | 551_7   | Clustered | 28 VC_551_7  | 28  | 0.1661 | 1          | 0.1661 | 0 | 0 | 0 | 0.8519 | Ref   |
| KY549153 | Unassigned | Unassigned | Unassigned | 956_0   | Clustered | 39 VC_956_0  | 39  | 1      | 1          | 1      | 0 | 0 | 0 |        | 1 Ref |
| KY549154 | Unassigned | Unassigned | Unassigned | 956_0   | Clustered | 39 VC_956_0  | 39  | 1      | 1          | 1      | 0 | 0 | 0 |        | 1 Ref |
| KY549155 | Unassigned | Unassigned | Unassigned | 517_1   | Clustered | 108 VC_517_1 | 108 | 0.8483 | 1          | 0.8483 | 0 | 0 | 0 | 0.9955 | Ref   |
| KY549443 | Unassigned | Unassigned | Unassigned | 92_0    | Clustered | 22 VC_92_0   | 22  | 0.5639 | 1          | 0.5639 | 0 | 0 | 0 |        | 1 Ref |
| KY549659 | Unassigned | Unassigned | Unassigned | 841_0   | Clustered | 10 VC_841_0  | 10  | 0.5997 | 1          | 0.5997 | 0 | 0 | 0 |        | 1 Ref |
| KY554760 | Unassigned | Unassigned | Unassigned | 202_0   | Clustered | 102 VC_202_0 | 102 | 0.4049 | 1          | 0.4049 | 0 | 0 | 0 | 0.7876 | Ref   |
| KY554761 | Unassigned | Unassigned | Unassigned | 202_0   | Clustered | 102 VC_202_0 | 102 | 0.4049 | 1          | 0.4049 | 0 | 0 | 0 | 0.7876 | Ref   |
| KY554762 | Unassigned | Unassigned | Unassigned | 534_0   | Clustered | 9 VC_534_0   | 9   | 0.99   | 1          | 0.99   | 0 | 0 | 0 |        | 1 Ref |
| KY554763 | Unassigned | Unassigned | Unassigned | 534_0   | Clustered | 9 VC_534_0   | 9   | 0.99   | 1          | 0.99   | 0 | 0 | 0 |        | 1 Ref |
| KY554764 | Unassigned | Unassigned | Unassigned | 534_0   | Clustered | 9 VC_534_0   | 9   | 0.99   | 1          | 0.99   | 0 | 0 | 0 |        | 1 Ref |
| KY554765 | Unassigned | Unassigned | Unassigned | 534_0   | Clustered | 9 VC_534_0   | 9   | 0.99   | 1          | 0.99   | 0 | 0 | 0 |        | 1 Ref |
| KY554766 | Unassigned | Unassigned | Unassigned | 534_0   | Clustered | 9 VC_534_0   | 9   | 0.99   | 1          | 0.99   | 0 | 0 | 0 |        | 1 Ref |
| KY554767 | Unassigned | Unassigned | Unassigned | 534_0   | Clustered | 9 VC_534_0   | 9   | 0.99   | 1          | 0.99   | 0 | 0 | 0 |        | 1 Ref |
| KY554768 | Unassigned | Unassigned | Unassigned | 474_0   | Clustered | 14 VC_474_0  | 14  | 0.8466 | 1          | 0.8466 | 0 | 0 | 0 |        | 1 Ref |
| KY554769 | Unassigned | Unassigned | Unassigned | 474_0   | Clustered | 14 VC_474_0  | 14  | 0.8466 | 1          | 0.8466 | 0 | 0 | 0 |        | 1 Ref |
| KY554770 | Unassigned | Unassigned | Unassigned | 474_0   | Clustered | 14 VC_474_0  | 14  | 0.8466 | 1          | 0.8466 | 0 | 0 | 0 |        | 1 Ref |
| KY554771 | Unassigned | Unassigned | Unassigned | 474_0   | Clustered | 14 VC_474_0  | 14  | 0.8466 | 1          | 0.8466 | 0 | 0 | 0 |        | 1 Ref |
| KY554772 | Unassigned | Unassigned | Unassigned | 474_0   | Clustered | 14 VC_474_0  | 14  | 0.8466 | 1          | 0.8466 | 0 | 0 | 0 |        | 1 Ref |
| KY554773 | Unassigned | Unassigned | Unassigned | 474_0   | Clustered | 14 VC_474_0  | 14  | 0.8466 | 1          | 0.8466 | 0 | 0 | 0 |        | 1 Ref |
| KY554774 | Unassigned | Unassigned | Unassigned | 474_0   | Clustered | 14 VC_474_0  | 14  | 0.8466 | 1          | 0.8466 | 0 | 0 | 0 |        | 1 Ref |
| KY554775 | Unassigned | Unassigned | Unassigned | 474_0   | Clustered | 14 VC_474_0  | 14  | 0.8466 | 1          | 0.8466 | 0 | 0 | 0 |        | 1 Ref |
| KY554776 | Unassigned | Unassigned | Unassigned | 474_0   | Clustered | 14 VC_474_0  | 14  | 0.8466 | 1          | 0.8466 | 0 | 0 | 0 |        | 1 Ref |
| KY554777 | Unassigned | Unassigned | Unassigned | 474_0   | Clustered | 14 VC_474_0  | 14  | 0.8466 | 1          | 0.8466 | 0 | 0 | 0 |        | 1 Ref |
| KY555142 | Unassigned | Unassigned | Unassigned | 976_4   | Clustered | 11 VC_976_4  | 11  | 0.3364 | 1          | 0.3364 | 0 | 0 | 0 |        | 1 Ref |
| KY555143 | Unassigned | Unassigned | Unassigned | 976_4   | Clustered | 11 VC_976_4  | 11  | 0.3364 | 1          | 0.3364 | 0 | 0 | 0 |        | 1 Ref |
| KY555144 | Unassigned | Unassigned | Unassigned | 976_4   | Clustered | 11 VC_976_4  | 11  | 0.3364 | 1          | 0.3364 | 0 | 0 | 0 |        | 1 Ref |
| KY555145 | Unassigned | Unassigned | Unassigned | 976_4   | Clustered | 11 VC_976_4  | 11  | 0.3364 | 1          | 0.3364 | 0 | 0 | 0 |        | 1 Ref |
| KY555146 | Unassigned | Unassigned | Unassigned | 976_4   | Clustered | 11 VC_976_4  | 11  | 0.3364 | 1          | 0.3364 | 0 | 0 | 0 |        | 1 Ref |
| KY555147 | Unassigned | Unassigned | Unassigned | 976_4   | Clustered | 11 VC_976_4  | 11  | 0.3364 | 1          | 0.3364 | 0 | 0 | 0 |        | 1 Ref |
| KY563228 | Unassigned | Unassigned | Unassigned | 599_0   | Clustered | 50 VC_599_0  | 50  | 0.9989 | 1          | 0.9989 | 0 | 0 | 0 |        | 1 Ref |
| KY565347 | Unassigned | Unassigned | Unassigned | 101_0   | Clustered | 3 VC_101_0   | 3   | 0.3621 | 0.99764884 | 0.3612 | 0 | 0 | 0 |        | 1 Ref |
| KY566218 | Unassigned | Unassigned | Unassigned | 408_0   | Clustered | 9 VC_408_0   | 9   | 0.86   | 1          | 0.86   | 0 | 0 | 0 |        | 1 Ref |
| KY575286 | Unassigned | Unassigned | Unassigned | 938_0   | Clustered | 99 VC_938_0  | 99  | 0.9119 | 1          | 0.9119 | 0 | 0 | 0 | 0.9928 | Ref   |
| KY579375 | Unassigned | Unassigned | Unassigned | 599_0   | Clustered | 50 VC_599_0  | 50  | 0.9989 | 1          | 0.9989 | 0 | 0 | 0 |        | 1 Ref |
| KY581279 | Unassigned | Unassigned | Unassigned | 149_8   | Clustered | 66 VC_149_8  | 66  | 0.4565 | 1          | 0.4565 | 0 | 0 | 0 | 0.8182 | Ref   |
| KY593455 | Unassigned | Unassigned | Unassigned | 490_3   | Clustered | 2 VC_490_3   | 2   | 0.0135 | 0.95703149 | 0.0129 | 0 | 0 | 0 |        | 1 Ref |
| KY608966 | Unassigned | Unassigned | Unassigned | 428_0   | Clustered | 33 VC_428_0  | 33  | 0.9915 | 1          | 0.9915 | 0 | 0 | 0 |        | 1 Ref |
| KY608967 | Unassigned | Unassigned | Unassigned | 283_109 | Clustered | 2 VC_283_109 | 2   | 0.0027 | 0.91535723 | 0.0024 | 0 | 0 | 0 |        | 1 Ref |
| KY612839 | Unassigned | Unassigned | Unassigned | 784_0   | Clustered | 6 VC_784_0   | 6   | 0.5517 | 1          | 0.5517 | 0 | 0 | 0 |        | 1 Ref |
| KY613597 | Unassigned | Unassigned | Unassigned | 408_0   | Clustered | 9 VC_408_0   | 9   | 0.86   | 1          | 0.86   | 0 | 0 | 0 |        | 1 Ref |
| KY618819 | Unassigned | Unassigned | Unassigned | 423_0   | Clustered | 45 VC_423_0  | 45  | 0.9484 | 1          | 0.9484 | 0 | 0 | 0 |        | 1 Ref |
| KY620117 | Unassigned | Unassigned | Unassigned | 592_0   | Clustered | 50 VC_592_0  | 50  | 0.7314 | 1          | 0.7314 | 0 | 0 | 0 |        | 1 Ref |
| KY622015 | Unassigned | Unassigned | Unassigned | 498_0   | Clustered | 8 VC_498_0   | 8   | 0.3987 | 1          | 0.3987 | 0 | 0 | 0 |        | 1 Ref |
| KY624610 | Unassigned | Unassigned | Unassigned | 408_0   | Clustered | 9 VC_408_0   | 9   | 0.86   | 1          | 0.86   | 0 | 0 | 0 |        | 1 Ref |
| KY624611 | Unassigned | Unassigned | Unassigned | 408_0   | Clustered | 9 VC_408_0   | 9   | 0.86   | 1          | 0.86   | 0 | 0 | 0 |        | 1 Ref |
| KY624612 | Unassigned | Unassigned | Unassigned | 408_0   | Clustered | 9 VC_408_0   | 9   | 0.86   | 1          | 0.86   | 0 | 0 | 0 |        | 1 Ref |
| KY624613 | Unassigned | Unassigned | Unassigned | 408_0   | Clustered | 9 VC_408_0   | 9   | 0.86   | 1          | 0.86   | 0 | 0 | 0 |        | 1 Ref |
| KY624614 | Unassigned | Unassigned | Unassigned | 408_0   | Clustered | 9 VC_408_0   | 9   | 0.86   | 1          | 0.86   | 0 | 0 | 0 |        | 1 Ref |
| KY624615 | Unassigned | Unassigned | Unassigned | 408_0   | Clustered | 9 VC_408_0   | 9   | 0.86   | 1          | 0.86   | 0 | 0 | 0 |        | 1 Ref |
| KY624616 | Unassigned | Unassigned | Unassigned | 408_0   | Clustered | 9 VC_408_0   | 9   | 0.86   | 1          | 0.86   | 0 | 0 | 0 |        | 1 Ref |
| KY626162 | Unassigned | Unassigned | Unassigned | 329_1   | Clustered | 17 VC_329_1  | 17  | 0.0867 | 1          | 0.0867 | 0 | 0 | 0 | 0.8235 | Ref   |
| KY626163 | Unassigned | Unassigned | Unassigned | 637_0   | Clustered | 115 VC_637_0 | 115 | 0.731  | 1          | 0.731  | 0 | 0 | 0 | 0.8764 | Ref   |
| KY626176 | Unassigned | Unassigned | Unassigned | 1027_0  | Clustered | 20 VC_1027_0 | 20  | 0.7114 | 1          | 0.7114 | 0 | 0 | 0 |        | 1 Ref |
| KY626177 | Unassigned | Unassigned | Unassigned | 1027_0  | Clustered | 20 VC_1027_0 | 20  | 0.7114 | 1          | 0.7114 | 0 | 0 | 0 |        | 1 Ref |
| KY629563 | Unassigned | Unassigned | Unassigned | 978_0   | Clustered | 2 VC_978_0   | 2   | 0.0595 | 0.95411371 | 0.0568 | 0 | 0 | 0 |        | 1 Ref |
| KY629621 | Unassigned | Unassigned | Unassigned | 891_0   | Clustered | 2 VC_891_0   | 2   | 0.5746 | 0.92263554 | 0.5301 | 0 | 0 | 0 |        | 1 Ref |
| KY630163 | Unassigned | Unassigned | Unassigned | 133_34  | Clustered | 3 VC_133_34  | 3   | 0.0102 | 0.97369044 | 0.01   | 0 | 0 | 0 | 0.6667 | Ref   |
| KY630187 | Unassigned | Unassigned | Unassigned | 164_7   | Clustered | 7 VC_164_7   | 7   | 0.0956 | 0.99998    | 0.0956 | 0 | 0 | 0 |        | 1 Ref |
| KY652723 | Unassigned | Unassigned | Unassigned | 823_0   | Clustered | 124 VC_823_0 | 124 | 0.9492 | 1          | 0.9492 | 0 | 0 | 0 |        | 1 Ref |
| KY652724 | Unassigned | Unassigned | Unassigned | 823_0   | Clustered | 124 VC_823_0 | 124 | 0.9492 | 1          | 0.9492 | 0 | 0 | 0 |        | 1 Ref |
| KY652725 | Unassigned | Unassigned | Unassigned | 823_0   | Clustered | 124 VC_823_0 | 124 | 0.9492 | 1          | 0.9492 | 0 | 0 | 0 |        | 1 Ref |



|          |            |            |            |        |           |              |     |        |            |        |   |   |   |        |     |
|----------|------------|------------|------------|--------|-----------|--------------|-----|--------|------------|--------|---|---|---|--------|-----|
| KY652726 | Unassigned | Unassigned | Unassigned | 582_3  | Clustered | 12 VC_582_3  | 12  | 0.2357 | 1          | 0.2357 | 0 | 0 | 0 | 0.8636 | Ref |
| KY653119 | Unassigned | Unassigned | Unassigned | 245_0  | Clustered | 10 VC_245_0  | 10  | 0.1805 | 1          | 0.1805 | 0 | 0 | 0 | 0.9778 | Ref |
| KY653123 | Unassigned | Unassigned | Unassigned | 10_0   | Clustered | 25 VC_10_0   | 25  | 0.3467 | 1          | 0.3467 | 0 | 0 | 0 | 0.9733 | Ref |
| KY653125 | Unassigned | Unassigned | Unassigned | 7_0    | Clustered | 28 VC_7_0    | 28  | 0.3916 | 1          | 0.3916 | 0 | 0 | 0 | 0.9947 | Ref |
| KY653237 | Unassigned | Unassigned | Unassigned | 303_0  | Clustered | 155 VC_303_0 | 155 | 0.9979 | 1          | 0.9979 | 0 | 0 | 0 | 1      | Ref |
| KY654690 | Unassigned | Unassigned | Unassigned | 330_0  | Clustered | 27 VC_330_0  | 27  | 0.5088 | 1          | 0.5088 | 0 | 0 | 0 | 0.8661 | Ref |
| KY657202 | Unassigned | Unassigned | Unassigned | 584_0  | Clustered | 28 VC_584_0  | 28  | 0.7704 | 1          | 0.7704 | 0 | 0 | 0 | 1      | Ref |
| KY658673 | Unassigned | Unassigned | Unassigned | 299_0  | Clustered | 24 VC_299_0  | 24  | 0.9905 | 1          | 0.9905 | 0 | 0 | 0 | 1      | Ref |
| KY658674 | Unassigned | Unassigned | Unassigned | 299_0  | Clustered | 24 VC_299_0  | 24  | 0.9905 | 1          | 0.9905 | 0 | 0 | 0 | 1      | Ref |
| KY658675 | Unassigned | Unassigned | Unassigned | 299_0  | Clustered | 24 VC_299_0  | 24  | 0.9905 | 1          | 0.9905 | 0 | 0 | 0 | 1      | Ref |
| KY658676 | Unassigned | Unassigned | Unassigned | 299_0  | Clustered | 24 VC_299_0  | 24  | 0.9905 | 1          | 0.9905 | 0 | 0 | 0 | 1      | Ref |
| KY658677 | Unassigned | Unassigned | Unassigned | 299_0  | Clustered | 24 VC_299_0  | 24  | 0.9905 | 1          | 0.9905 | 0 | 0 | 0 | 1      | Ref |
| KY658678 | Unassigned | Unassigned | Unassigned | 299_0  | Clustered | 24 VC_299_0  | 24  | 0.9905 | 1          | 0.9905 | 0 | 0 | 0 | 1      | Ref |
| KY658679 | Unassigned | Unassigned | Unassigned | 299_0  | Clustered | 24 VC_299_0  | 24  | 0.9905 | 1          | 0.9905 | 0 | 0 | 0 | 1      | Ref |
| KY658680 | Unassigned | Unassigned | Unassigned | 299_0  | Clustered | 24 VC_299_0  | 24  | 0.9905 | 1          | 0.9905 | 0 | 0 | 0 | 1      | Ref |
| KY661963 | Unassigned | Unassigned | Unassigned | 730_0  | Clustered | 9 VC_730_0   | 9   | 1      | 1          | 1      | 0 | 0 | 0 | 1      | Ref |
| KY670595 | Unassigned | Unassigned | Unassigned | 698_0  | Clustered | 26 VC_698_0  | 26  | 0.9366 | 1          | 0.9366 | 0 | 0 | 0 | 1      | Ref |
| KY676783 | Unassigned | Unassigned | Unassigned | 371_15 | Clustered | 44 VC_371_15 | 44  | 0.1391 | 1          | 0.1391 | 0 | 0 | 0 | 0.7474 | Ref |
| KY676784 | Unassigned | Unassigned | Unassigned | 727_0  | Clustered | 11 VC_727_0  | 11  | 0.5054 | 1          | 0.5054 | 0 | 0 | 0 | 1      | Ref |
| KY677846 | Unassigned | Unassigned | Unassigned | 190_15 | Clustered | 3 VC_190_15  | 3   | 0.0146 | 0.99759465 | 0.0145 | 0 | 0 | 0 | 0.6667 | Ref |
| KY683735 | Unassigned | Unassigned | Unassigned | 590_0  | Clustered | 27 VC_590_0  | 27  | 0.9947 | 1          | 0.9947 | 0 | 0 | 0 | 1      | Ref |
| KY683736 | Unassigned | Unassigned | Unassigned | 772_9  | Clustered | 7 VC_772_9   | 7   | 0.0369 | 0.87705503 | 0.0324 | 0 | 0 | 0 | 1      | Ref |
| KY684082 | Unassigned | Unassigned | Unassigned | 111_0  | Clustered | 91 VC_111_0  | 91  | 0.9587 | 1          | 0.9587 | 0 | 0 | 0 | 1      | Ref |
| KY694971 | Unassigned | Unassigned | Unassigned | 584_0  | Clustered | 28 VC_584_0  | 28  | 0.7704 | 1          | 0.7704 | 0 | 0 | 0 | 1      | Ref |
| KY695153 | Unassigned | Unassigned | Unassigned | 7_0    | Clustered | 28 VC_7_0    | 28  | 0.3916 | 1          | 0.3916 | 0 | 0 | 0 | 0.9947 | Ref |
| KY703222 | Unassigned | Unassigned | Unassigned | 286_10 | Clustered | 9 VC_286_10  | 9   | 0.0615 | 0.99999878 | 0.0615 | 0 | 0 | 0 | 0.6667 | Ref |
| KY705251 | Unassigned | Unassigned | Unassigned | 252_0  | Clustered | 121 VC_252_0 | 121 | 0.7376 | 1          | 0.7376 | 0 | 0 | 0 | 0.9999 | Ref |
| KY705252 | Unassigned | Unassigned | Unassigned | 255_0  | Clustered | 13 VC_255_0  | 13  | 0.2048 | 1          | 0.2048 | 0 | 0 | 0 | 1      | Ref |
| KY705253 | Unassigned | Unassigned | Unassigned | 255_0  | Clustered | 13 VC_255_0  | 13  | 0.2048 | 1          | 0.2048 | 0 | 0 | 0 | 1      | Ref |
| KY705254 | Unassigned | Unassigned | Unassigned | 255_0  | Clustered | 13 VC_255_0  | 13  | 0.2048 | 1          | 0.2048 | 0 | 0 | 0 | 1      | Ref |
| KY705255 | Unassigned | Unassigned | Unassigned | 255_0  | Clustered | 13 VC_255_0  | 13  | 0.2048 | 1          | 0.2048 | 0 | 0 | 0 | 1      | Ref |
| KY705256 | Unassigned | Unassigned | Unassigned | 252_0  | Clustered | 121 VC_252_0 | 121 | 0.7376 | 1          | 0.7376 | 0 | 0 | 0 | 0.9999 | Ref |
| KY705257 | Unassigned | Unassigned | Unassigned | 252_0  | Clustered | 121 VC_252_0 | 121 | 0.7376 | 1          | 0.7376 | 0 | 0 | 0 | 0.9999 | Ref |
| KY705258 | Unassigned | Unassigned | Unassigned | 254_0  | Clustered | 46 VC_254_0  | 46  | 0.5159 | 1          | 0.5159 | 0 | 0 | 0 | 1      | Ref |
| KY705259 | Unassigned | Unassigned | Unassigned | 252_0  | Clustered | 121 VC_252_0 | 121 | 0.7376 | 1          | 0.7376 | 0 | 0 | 0 | 0.9999 | Ref |
| KY705260 | Unassigned | Unassigned | Unassigned | 252_0  | Clustered | 121 VC_252_0 | 121 | 0.7376 | 1          | 0.7376 | 0 | 0 | 0 | 0.9999 | Ref |
| KY705261 | Unassigned | Unassigned | Unassigned | 252_0  | Clustered | 121 VC_252_0 | 121 | 0.7376 | 1          | 0.7376 | 0 | 0 | 0 | 0.9999 | Ref |
| KY705262 | Unassigned | Unassigned | Unassigned | 252_0  | Clustered | 121 VC_252_0 | 121 | 0.7376 | 1          | 0.7376 | 0 | 0 | 0 | 0.9999 | Ref |
| KY705263 | Unassigned | Unassigned | Unassigned | 252_0  | Clustered | 121 VC_252_0 | 121 | 0.7376 | 1          | 0.7376 | 0 | 0 | 0 | 0.9999 | Ref |
| KY705264 | Unassigned | Unassigned | Unassigned | 252_0  | Clustered | 121 VC_252_0 | 121 | 0.7376 | 1          | 0.7376 | 0 | 0 | 0 | 0.9999 | Ref |
| KY705265 | Unassigned | Unassigned | Unassigned | 252_0  | Clustered | 121 VC_252_0 | 121 | 0.7376 | 1          | 0.7376 | 0 | 0 | 0 | 0.9999 | Ref |
| KY705266 | Unassigned | Unassigned | Unassigned | 252_0  | Clustered | 121 VC_252_0 | 121 | 0.7376 | 1          | 0.7376 | 0 | 0 | 0 | 0.9999 | Ref |
| KY705267 | Unassigned | Unassigned | Unassigned | 252_0  | Clustered | 121 VC_252_0 | 121 | 0.7376 | 1          | 0.7376 | 0 | 0 | 0 | 0.9999 | Ref |
| KY705268 | Unassigned | Unassigned | Unassigned | 254_0  | Clustered | 46 VC_254_0  | 46  | 0.5159 | 1          | 0.5159 | 0 | 0 | 0 | 1      | Ref |
| KY705269 | Unassigned | Unassigned | Unassigned | 254_0  | Clustered | 46 VC_254_0  | 46  | 0.5159 | 1          | 0.5159 | 0 | 0 | 0 | 1      | Ref |
| KY705270 | Unassigned | Unassigned | Unassigned | 252_0  | Clustered | 121 VC_252_0 | 121 | 0.7376 | 1          | 0.7376 | 0 | 0 | 0 | 0.9999 | Ref |
| KY705271 | Unassigned | Unassigned | Unassigned | 252_0  | Clustered | 121 VC_252_0 | 121 | 0.7376 | 1          | 0.7376 | 0 | 0 | 0 | 0.9999 | Ref |
| KY705272 | Unassigned | Unassigned | Unassigned | 252_0  | Clustered | 121 VC_252_0 | 121 | 0.7376 | 1          | 0.7376 | 0 | 0 | 0 | 0.9999 | Ref |
| KY705273 | Unassigned | Unassigned | Unassigned | 252_0  | Clustered | 121 VC_252_0 | 121 | 0.7376 | 1          | 0.7376 | 0 | 0 | 0 | 0.9999 | Ref |
| KY705274 | Unassigned | Unassigned | Unassigned | 252_0  | Clustered | 121 VC_252_0 | 121 | 0.7376 | 1          | 0.7376 | 0 | 0 | 0 | 0.9999 | Ref |
| KY705275 | Unassigned | Unassigned | Unassigned | 252_0  | Clustered | 121 VC_252_0 | 121 | 0.7376 | 1          | 0.7376 | 0 | 0 | 0 | 0.9999 | Ref |
| KY705276 | Unassigned | Unassigned | Unassigned | 252_0  | Clustered | 121 VC_252_0 | 121 | 0.7376 | 1          | 0.7376 | 0 | 0 | 0 | 0.9999 | Ref |
| KY705277 | Unassigned | Unassigned | Unassigned | 254_0  | Clustered | 46 VC_254_0  | 46  | 0.5159 | 1          | 0.5159 | 0 | 0 | 0 | 1      | Ref |
| KY705278 | Unassigned | Unassigned | Unassigned | 254_0  | Clustered | 46 VC_254_0  | 46  | 0.5159 | 1          | 0.5159 | 0 | 0 | 0 | 1      | Ref |
| KY705279 | Unassigned | Unassigned | Unassigned | 254_0  | Clustered | 46 VC_254_0  | 46  | 0.5159 | 1          | 0.5159 | 0 | 0 | 0 | 1      | Ref |
| KY705280 | Unassigned | Unassigned | Unassigned | 254_0  | Clustered | 46 VC_254_0  | 46  | 0.5159 | 1          | 0.5159 | 0 | 0 | 0 | 1      | Ref |
| KY705281 | Unassigned | Unassigned | Unassigned | 254_0  | Clustered | 46 VC_254_0  | 46  | 0.5159 | 1          | 0.5159 | 0 | 0 | 0 | 1      | Ref |
| KY705282 | Unassigned | Unassigned | Unassigned | 252_0  | Clustered | 121 VC_252_0 | 121 | 0.7376 | 1          | 0.7376 | 0 | 0 | 0 | 0.9999 | Ref |
| KY705283 | Unassigned | Unassigned | Unassigned | 252_0  | Clustered | 121 VC_252_0 | 121 | 0.7376 | 1          | 0.7376 | 0 | 0 | 0 | 0.9999 | Ref |
| KY705284 | Unassigned | Unassigned | Unassigned | 252_0  | Clustered | 121 VC_252_0 | 121 | 0.7376 | 1          | 0.7376 | 0 | 0 | 0 | 0.9999 | Ref |
| KY705285 | Unassigned | Unassigned | Unassigned | 254_0  | Clustered | 46 VC_254_0  | 46  | 0.5159 | 1          | 0.5159 | 0 | 0 | 0 | 1      | Ref |
| KY705286 | Unassigned | Unassigned | Unassigned | 254_0  | Clustered | 46 VC_254_0  | 46  | 0.5159 | 1          | 0.5159 | 0 | 0 | 0 | 1      | Ref |
| KY705287 | Unassigned | Unassigned | Unassigned | 252_0  | Clustered | 121 VC_252_0 | 121 | 0.7376 | 1          | 0.7376 | 0 | 0 | 0 | 0.9999 | Ref |
| KY705288 | Unassigned | Unassigned | Unassigned | 252_0  | Clustered | 121 VC_252_0 | 121 | 0.7376 | 1          | 0.7376 | 0 | 0 | 0 | 0.9999 | Ref |
| KY705289 | Unassigned | Unassigned | Unassigned | 252_0  | Clustered | 121 VC_252_0 | 121 | 0.7376 | 1          | 0.7376 | 0 | 0 | 0 | 0.9999 | Ref |
| KY705290 | Unassigned | Unassigned | Unassigned | 252_0  | Clustered | 121 VC_252_0 | 121 | 0.7376 | 1          | 0.7376 | 0 | 0 | 0 | 0.9999 | Ref |
| KY705409 | Unassigned | Unassigned | Unassigned | 125_0  | Clustered | 17 VC_125_0  | 17  | 0.9244 | 1          | 0.9244 | 0 | 0 | 0 | 1      | Ref |
| KY707339 | Unassigned | Unassigned | Unassigned | 747_0  | Clustered | 23 VC_747_0  | 23  | 0.8202 | 1          | 0.8202 | 0 | 0 | 0 | 1      | Ref |
| KY709296 | Unassigned | Unassigned | Unassigned | 793_0  | Clustered | 12 VC_793_0  | 12  | 0.8531 | 1          | 0.8531 | 0 | 0 | 0 | 1      | Ref |
| KY744228 | Unassigned | Unassigned | Unassigned | 348_0  | Clustered | 22 VC_348_0  | 22  | 0.9602 | 1          | 0.9602 | 0 | 0 | 0 | 1      | Ref |
| KY744229 | Unassigned | Unassigned | Unassigned | 348_0  | Clustered | 22 VC_348_0  | 22  | 0.9602 | 1          | 0.9602 | 0 | 0 | 0 | 1      | Ref |
| KY744230 | Unassigned | Unassigned | Unassigned | 348_0  | Clustered | 22 VC_348_0  | 22  | 0.9602 | 1          | 0.9602 | 0 | 0 | 0 | 1      | Ref |
| KY744231 | Unassigned | Unassigned | Unassigned | 348_0  | Clustered | 22 VC_348_0  | 22  | 0.9602 | 1          | 0.9602 | 0 | 0 | 0 | 1      | Ref |
| KY744232 | Unassigned | Unassigned | Unassigned | 348_0  | Clustered | 22 VC_348_0  | 22  | 0.9602 | 1          | 0.9602 | 0 | 0 | 0 | 1      | Ref |
| KY744233 | Unassigned | Unassigned | Unassigned | 348_0  | Clustered | 22 VC_348_0  | 22  | 0.9602 | 1          | 0.9602 | 0 | 0 | 0 | 1      | Ref |
| KY744234 | Unassigned | Unassigned | Unassigned | 348_0  | Clustered | 22 VC_348_0  | 22  | 0.9602 | 1          | 0.9602 | 0 | 0 | 0 | 1      | Ref |
| KY744235 | Unassigned | Unassigned | Unassigned | 348_0  | Clustered | 22 VC_348_0  | 22  | 0.9602 | 1          | 0.9602 | 0 | 0 | 0 | 1      | Ref |
| KY744240 | Unassigned | Unassigned | Unassigned | 269_0  | Clustered | 3 VC_269_0   | 3   | 0.1948 | 0.99308177 | 0.1934 | 0 | 0 | 0 | 1      | Ref |
| KY744566 | Unassigned | Unassigned | Unassigned | 452_0  | Clustered | 66 VC_452_0  | 66  | 0.9248 | 1          | 0.9248 | 0 | 0 | 0 | 1      | Ref |
| KY769270 | Unassigned | Unassigned | Unassigned | 841_0  | Clustered | 10 VC_841_0  | 10  | 0.5997 | 1          | 0.5997 | 0 | 0 | 0 | 1      | Ref |
| KY779848 | Unassigned | Unassigned | Unassigned | 153_0  | Clustered | 25 VC_153_0  | 25  | 0.7729 | 1          | 0.7729 | 0 | 0 | 0 | 1      | Ref |



|          |            |            |            |        |                     |              |     |        |            |        |   |   |   |        |     |
|----------|------------|------------|------------|--------|---------------------|--------------|-----|--------|------------|--------|---|---|---|--------|-----|
| KY779849 | Unassigned | Unassigned | Unassigned | 149_15 | Clustered           | 16 VC_149_15 | 16  | 0.0788 | 1          | 0.0788 | 0 | 0 | 0 | 0.8083 | Ref |
| KY780482 | Unassigned | Unassigned | Unassigned | 937_0  | Clustered           | 40 VC_937_0  | 40  | 0.6809 | 1          | 0.6809 | 0 | 0 | 0 | 0.9359 | Ref |
| KY783914 | Unassigned | Unassigned | Unassigned | 763_2  | Clustered           | 7 VC_763_2   | 7   | 0.2612 | 1          | 0.2612 | 0 | 0 | 0 | 1      | Ref |
| KY787212 | Unassigned | Unassigned | Unassigned | 191_16 | Clustered           | 12 VC_191_16 | 12  | 0.0643 | 1          | 0.0643 | 0 | 0 | 0 | 0.9394 | Ref |
| KY787213 | Unassigned | Unassigned | Unassigned | 133_34 | Clustered           | 3 VC_133_34  | 3   | 0.0102 | 0.97369044 | 0.01   | 0 | 0 | 0 | 0.6667 | Ref |
| KY794641 | Unassigned | Unassigned | Unassigned | 149_10 | Clustered/Singleton | 1 VC_149_10  | 1   | 0      | 1          | 0      | 0 | 0 | 0 | 1      | Ref |
| KY794642 | Unassigned | Unassigned | Unassigned | 149_29 | Clustered           | 3 VC_149_29  | 3   | 0.012  | 0.99448577 | 0.012  | 0 | 0 | 0 | 1      | Ref |
| KY794643 | Unassigned | Unassigned | Unassigned | 149_29 | Clustered           | 3 VC_149_29  | 3   | 0.012  | 0.99448577 | 0.012  | 0 | 0 | 0 | 1      | Ref |
| KY798120 | Unassigned | Unassigned | Unassigned | 129_0  | Clustered           | 43 VC_129_0  | 43  | 0.886  | 1          | 0.886  | 0 | 0 | 0 | 1      | Ref |
| KY798121 | Unassigned | Unassigned | Unassigned | 129_0  | Clustered           | 43 VC_129_0  | 43  | 0.886  | 1          | 0.886  | 0 | 0 | 0 | 1      | Ref |
| KY817360 | Unassigned | Unassigned | Unassigned | 1201_0 | Clustered           | 2 VC_1201_0  | 2   | 0.8919 | 0.81445332 | 0.7264 | 0 | 0 | 0 | 1      | Ref |
| KY829116 | Unassigned | Unassigned | Unassigned | 698_0  | Clustered           | 26 VC_698_0  | 26  | 0.9366 | 1          | 0.9366 | 0 | 0 | 0 | 1      | Ref |
| KY853667 | Unassigned | Unassigned | Unassigned | 177_0  | Clustered           | 5 VC_177_0   | 5   | 0.7468 | 0.99885646 | 0.746  | 0 | 0 | 0 | 1      | Ref |
| KY860935 | Unassigned | Unassigned | Unassigned | 461_0  | Clustered           | 96 VC_461_0  | 96  | 0.9307 | 1          | 0.9307 | 0 | 0 | 0 | 0.9575 | Ref |
| KY883634 | Unassigned | Unassigned | Unassigned | 495_1  | Clustered           | 41 VC_495_1  | 41  | 0.328  | 1          | 0.328  | 0 | 0 | 0 | 0.911  | Ref |
| KY883635 | Unassigned | Unassigned | Unassigned | 495_1  | Clustered           | 41 VC_495_1  | 41  | 0.328  | 1          | 0.328  | 0 | 0 | 0 | 0.911  | Ref |
| KY883636 | Unassigned | Unassigned | Unassigned | 495_1  | Clustered           | 41 VC_495_1  | 41  | 0.328  | 1          | 0.328  | 0 | 0 | 0 | 0.911  | Ref |
| KY883637 | Unassigned | Unassigned | Unassigned | 495_1  | Clustered           | 41 VC_495_1  | 41  | 0.328  | 1          | 0.328  | 0 | 0 | 0 | 0.911  | Ref |
| KY883638 | Unassigned | Unassigned | Unassigned | 495_0  | Clustered           | 39 VC_495_0  | 39  | 0.308  | 1          | 0.308  | 0 | 0 | 0 | 1      | Ref |
| KY883639 | Unassigned | Unassigned | Unassigned | 495_0  | Clustered           | 39 VC_495_0  | 39  | 0.308  | 1          | 0.308  | 0 | 0 | 0 | 1      | Ref |
| KY883640 | Unassigned | Unassigned | Unassigned | 495_0  | Clustered           | 39 VC_495_0  | 39  | 0.308  | 1          | 0.308  | 0 | 0 | 0 | 1      | Ref |
| KY883641 | Unassigned | Unassigned | Unassigned | 82_0   | Clustered           | 24 VC_82_0   | 24  | 0.7351 | 1          | 0.7351 | 0 | 0 | 0 | 1      | Ref |
| KY883642 | Unassigned | Unassigned | Unassigned | 607_0  | Clustered           | 16 VC_607_0  | 16  | 0.9179 | 1          | 0.9179 | 0 | 0 | 0 | 1      | Ref |
| KY883643 | Unassigned | Unassigned | Unassigned | 82_0   | Clustered           | 24 VC_82_0   | 24  | 0.7351 | 1          | 0.7351 | 0 | 0 | 0 | 1      | Ref |
| KY883644 | Unassigned | Unassigned | Unassigned | 82_0   | Clustered           | 24 VC_82_0   | 24  | 0.7351 | 1          | 0.7351 | 0 | 0 | 0 | 1      | Ref |
| KY883645 | Unassigned | Unassigned | Unassigned | 82_0   | Clustered           | 24 VC_82_0   | 24  | 0.7351 | 1          | 0.7351 | 0 | 0 | 0 | 1      | Ref |
| KY883646 | Unassigned | Unassigned | Unassigned | 82_0   | Clustered           | 24 VC_82_0   | 24  | 0.7351 | 1          | 0.7351 | 0 | 0 | 0 | 1      | Ref |
| KY883647 | Unassigned | Unassigned | Unassigned | 607_0  | Clustered           | 16 VC_607_0  | 16  | 0.9179 | 1          | 0.9179 | 0 | 0 | 0 | 1      | Ref |
| KY883648 | Unassigned | Unassigned | Unassigned | 82_0   | Clustered           | 24 VC_82_0   | 24  | 0.7351 | 1          | 0.7351 | 0 | 0 | 0 | 1      | Ref |
| KY883649 | Unassigned | Unassigned | Unassigned | 82_0   | Clustered           | 24 VC_82_0   | 24  | 0.7351 | 1          | 0.7351 | 0 | 0 | 0 | 1      | Ref |
| KY883650 | Unassigned | Unassigned | Unassigned | 82_0   | Clustered           | 24 VC_82_0   | 24  | 0.7351 | 1          | 0.7351 | 0 | 0 | 0 | 1      | Ref |
| KY883651 | Unassigned | Unassigned | Unassigned | 82_0   | Clustered           | 24 VC_82_0   | 24  | 0.7351 | 1          | 0.7351 | 0 | 0 | 0 | 1      | Ref |
| KY883652 | Unassigned | Unassigned | Unassigned | 82_0   | Clustered           | 24 VC_82_0   | 24  | 0.7351 | 1          | 0.7351 | 0 | 0 | 0 | 1      | Ref |
| KY883653 | Unassigned | Unassigned | Unassigned | 82_0   | Clustered           | 24 VC_82_0   | 24  | 0.7351 | 1          | 0.7351 | 0 | 0 | 0 | 1      | Ref |
| KY883654 | Unassigned | Unassigned | Unassigned | 971_0  | Clustered           | 3 VC_971_0   | 3   | 0.0548 | 0.99838914 | 0.0547 | 0 | 0 | 0 | 1      | Ref |
| KY883655 | Unassigned | Unassigned | Unassigned | 971_0  | Clustered           | 3 VC_971_0   | 3   | 0.0548 | 0.99838914 | 0.0547 | 0 | 0 | 0 | 1      | Ref |
| KY883656 | Unassigned | Unassigned | Unassigned | 607_0  | Clustered           | 16 VC_607_0  | 16  | 0.9179 | 1          | 0.9179 | 0 | 0 | 0 | 1      | Ref |
| KY883657 | Unassigned | Unassigned | Unassigned | 754_0  | Clustered           | 8 VC_754_0   | 8   | 0.752  | 1          | 0.752  | 0 | 0 | 0 | 1      | Ref |
| KY883658 | Unassigned | Unassigned | Unassigned | 754_0  | Clustered           | 8 VC_754_0   | 8   | 0.752  | 1          | 0.752  | 0 | 0 | 0 | 1      | Ref |
| KY888143 | Unassigned | Unassigned | Unassigned | 209_0  | Clustered           | 4 VC_209_0   | 4   | 0.1136 | 0.99998779 | 0.1136 | 0 | 0 | 0 | 1      | Ref |
| KY888680 | Unassigned | Unassigned | Unassigned | 609_0  | Clustered           | 71 VC_609_0  | 71  | 0.9352 | 1          | 0.9352 | 0 | 0 | 0 | 1      | Ref |
| KY888882 | Unassigned | Unassigned | Unassigned | 883_3  | Clustered           | 2 VC_883_3   | 2   | 0.0182 | 0.87900236 | 0.016  | 0 | 0 | 0 | 1      | Ref |
| KY914478 | Unassigned | Unassigned | Unassigned | 42_0   | Clustered           | 49 VC_42_0   | 49  | 0.4517 | 1          | 0.4517 | 0 | 0 | 0 | 0.8597 | Ref |
| KY926698 | Unassigned | Unassigned | Unassigned | 209_0  | Clustered           | 4 VC_209_0   | 4   | 0.1136 | 0.99998779 | 0.1136 | 0 | 0 | 0 | 1      | Ref |
| KY926699 | Unassigned | Unassigned | Unassigned | 209_0  | Clustered           | 4 VC_209_0   | 4   | 0.1136 | 0.99998779 | 0.1136 | 0 | 0 | 0 | 1      | Ref |
| KY926791 | Unassigned | Unassigned | Unassigned | 722_0  | Clustered           | 13 VC_722_0  | 13  | 0.5104 | 1          | 0.5104 | 0 | 0 | 0 | 1      | Ref |
| KY926792 | Unassigned | Unassigned | Unassigned | 765_0  | Clustered           | 132 VC_765_0 | 132 | 1      | 1          | 1      | 0 | 0 | 0 | 1      | Ref |
| KY926793 | Unassigned | Unassigned | Unassigned | 765_0  | Clustered           | 132 VC_765_0 | 132 | 1      | 1          | 1      | 0 | 0 | 0 | 1      | Ref |
| KY942056 | Unassigned | Unassigned | Unassigned | 131_0  | Clustered           | 17 VC_131_0  | 17  | 0.2671 | 1          | 0.2671 | 0 | 0 | 0 | 1      | Ref |
| KY942057 | Unassigned | Unassigned | Unassigned | 131_0  | Clustered           | 17 VC_131_0  | 17  | 0.2671 | 1          | 0.2671 | 0 | 0 | 0 | 1      | Ref |
| KY945355 | Unassigned | Unassigned | Unassigned | 237_2  | Clustered           | 11 VC_237_2  | 11  | 0.1409 | 1          | 0.1409 | 0 | 0 | 0 | 0.9818 | Ref |
| KY947509 | Unassigned | Unassigned | Unassigned | 818_0  | Clustered           | 20 VC_818_0  | 20  | 0.9601 | 1          | 0.9601 | 0 | 0 | 0 | 1      | Ref |
| KY951963 | Unassigned | Unassigned | Unassigned | 912_0  | Clustered           | 76 VC_912_0  | 76  | 0.979  | 1          | 0.979  | 0 | 0 | 0 | 1      | Ref |
| KY951964 | Unassigned | Unassigned | Unassigned | 912_0  | Clustered           | 76 VC_912_0  | 76  | 0.979  | 1          | 0.979  | 0 | 0 | 0 | 1      | Ref |
| KY953156 | Unassigned | Unassigned | Unassigned | 984_0  | Clustered           | 38 VC_984_0  | 38  | 0.9758 | 1          | 0.9758 | 0 | 0 | 0 | 1      | Ref |
| KY962008 | Unassigned | Unassigned | Unassigned | 451_0  | Clustered           | 80 VC_451_0  | 80  | 0.9991 | 1          | 0.9991 | 0 | 0 | 0 | 1      | Ref |
| KY963369 | Unassigned | Unassigned | Unassigned | 704_0  | Clustered           | 16 VC_704_0  | 16  | 0.7274 | 1          | 0.7274 | 0 | 0 | 0 | 1      | Ref |
| KY963370 | Unassigned | Unassigned | Unassigned | 704_0  | Clustered           | 16 VC_704_0  | 16  | 0.7274 | 1          | 0.7274 | 0 | 0 | 0 | 1      | Ref |
| KY963371 | Unassigned | Unassigned | Unassigned | 704_0  | Clustered           | 16 VC_704_0  | 16  | 0.7274 | 1          | 0.7274 | 0 | 0 | 0 | 1      | Ref |
| KY963424 | Unassigned | Unassigned | Unassigned | 190_23 | Clustered           | 10 VC_190_23 | 10  | 0.0704 | 1          | 0.0704 | 0 | 0 | 0 | 0.8444 | Ref |
| KY965063 | Unassigned | Unassigned | Unassigned | 514_0  | Clustered           | 75 VC_514_0  | 75  | 0.9402 | 1          | 0.9402 | 0 | 0 | 0 | 1      | Ref |
| KY965064 | Unassigned | Unassigned | Unassigned | 520_40 | Clustered           | 4 VC_520_40  | 4   | 0.0396 | 0.99998776 | 0.0396 | 0 | 0 | 0 | 1      | Ref |
| KY965065 | Unassigned | Unassigned | Unassigned | 216_6  | Clustered           | 42 VC_216_6  | 42  | 0.473  | 1          | 0.473  | 0 | 0 | 0 | 0.8351 | Ref |
| KY965066 | Unassigned | Unassigned | Unassigned | 371_18 | Clustered           | 10 VC_371_18 | 10  | 0.0302 | 1          | 0.0302 | 0 | 0 | 0 | 0.8    | Ref |
| KY965934 | Unassigned | Unassigned | Unassigned | 963_0  | Clustered           | 4 VC_963_0   | 4   | 0.8505 | 0.99879268 | 0.8495 | 0 | 0 | 0 | 1      | Ref |
| KY969628 | Unassigned | Unassigned | Unassigned | 568_0  | Clustered           | 8 VC_568_0   | 8   | 0.5738 | 1          | 0.5738 | 0 | 0 | 0 | 1      | Ref |
| KY971610 | Unassigned | Unassigned | Unassigned | 287_1  | Clustered/Singleton | 1 VC_287_1   | 1   | 0      | 1          | 0      | 0 | 0 | 0 | 1      | Ref |
| KY971611 | Unassigned | Unassigned | Unassigned | 129_0  | Clustered           | 43 VC_129_0  | 43  | 0.886  | 1          | 0.886  | 0 | 0 | 0 | 1      | Ref |
| KY979235 | Unassigned | Unassigned | Unassigned | 912_0  | Clustered           | 76 VC_912_0  | 76  | 0.979  | 1          | 0.979  | 0 | 0 | 0 | 1      | Ref |
| KY979236 | Unassigned | Unassigned | Unassigned | 912_0  | Clustered           | 76 VC_912_0  | 76  | 0.979  | 1          | 0.979  | 0 | 0 | 0 | 1      | Ref |
| KY979237 | Unassigned | Unassigned | Unassigned | 912_0  | Clustered           | 76 VC_912_0  | 76  | 0.979  | 1          | 0.979  | 0 | 0 | 0 | 1      | Ref |
| KY979238 | Unassigned | Unassigned | Unassigned | 912_0  | Clustered           | 76 VC_912_0  | 76  | 0.979  | 1          | 0.979  | 0 | 0 | 0 | 1      | Ref |
| KY979239 | Unassigned | Unassigned | Unassigned | 912_0  | Clustered           | 76 VC_912_0  | 76  | 0.979  | 1          | 0.979  | 0 | 0 | 0 | 1      | Ref |
| KY979240 | Unassigned | Unassigned | Unassigned | 912_0  | Clustered           | 76 VC_912_0  | 76  | 0.979  | 1          | 0.979  | 0 | 0 | 0 | 1      | Ref |
| KY979241 | Unassigned | Unassigned | Unassigned | 912_0  | Clustered           | 76 VC_912_0  | 76  | 0.979  | 1          | 0.979  | 0 | 0 | 0 | 1      | Ref |
| KY979242 | Unassigned | Unassigned | Unassigned | 912_0  | Clustered           | 76 VC_912_0  | 76  | 0.979  | 1          | 0.979  | 0 | 0 | 0 | 1      | Ref |
| KY979243 | Unassigned | Unassigned | Unassigned | 912_0  | Clustered           | 76 VC_912_0  | 76  | 0.979  | 1          | 0.979  | 0 | 0 | 0 | 1      | Ref |
| KY979244 | Unassigned | Unassigned | Unassigned | 912_0  | Clustered           | 76 VC_912_0  | 76  | 0.979  | 1          | 0.979  | 0 | 0 | 0 | 1      | Ref |
| KY979245 | Unassigned | Unassigned | Unassigned | 912_0  | Clustered           | 76 VC_912_0  | 76  | 0.979  | 1          | 0.979  | 0 | 0 | 0 | 1      | Ref |
| KY979246 | Unassigned | Unassigned | Unassigned | 912_0  | Clustered           | 76 VC_912_0  | 76  | 0.979  | 1          | 0.979  | 0 | 0 | 0 | 1      | Ref |
| KY979247 | Unassigned | Unassigned | Unassigned | 912_0  | Clustered           | 76 VC_912_0  | 76  | 0.979  | 1          | 0.979  | 0 | 0 | 0 | 1      | Ref |



|          |            |            |            |         |                     |              |     |        |            |        |   |   |   |        |            |
|----------|------------|------------|------------|---------|---------------------|--------------|-----|--------|------------|--------|---|---|---|--------|------------|
| KY981272 | Unassigned | Unassigned | Unassigned | 70_0    | Clustered           | 27 VC_70_0   | 27  | 0.5981 | 1          | 0.5981 | 0 | 0 | 0 | 0.9886 | Ref        |
| KY984068 | Unassigned | Unassigned | Unassigned | 67_2    | Clustered           | 2 VC_67_2    | 2   | 0.014  | 0.69357611 | 0.0097 | 0 | 0 | 0 |        | 1 Ref      |
| KY985004 | Unassigned | Unassigned | Unassigned | 575_0   | Clustered           | 35 VC_575_0  | 35  | 0.8815 | 1          | 0.8815 | 0 | 0 | 0 |        | 1 Ref      |
| KY992519 | Unassigned | Unassigned | Unassigned | 912_0   | Clustered           | 76 VC_912_0  | 76  | 0.979  | 1          | 0.979  | 0 | 0 | 0 |        | 1 Ref      |
| KY992520 | Unassigned | Unassigned | Unassigned | 912_0   | Clustered           | 76 VC_912_0  | 76  | 0.979  | 1          | 0.979  | 0 | 0 | 0 |        | 1 Ref      |
| KY994101 | Unassigned | Unassigned | Unassigned | 77_0    | Clustered           | 20 VC_77_0   | 20  | 0.9657 | 1          | 0.9657 | 0 | 0 | 0 |        | 1 Ref      |
| KY996523 | Unassigned | Unassigned | Unassigned | 897_0   | Clustered           | 6 VC_897_0   | 6   | 0.4156 | 1          | 0.4156 | 0 | 0 | 0 |        | 1 Ref      |
| L67CG    | Unassigned | Unassigned | Unassigned | 690_0   | Clustered           | 50 VC_690_0  | 50  | 0.9805 | 1          | 0.9805 | 0 | 0 | 0 |        | 1 Ref      |
| LAMCG    | Unassigned | Unassigned | Unassigned | 43_0    | Clustered           | 38 VC_43_0   | 38  | 0.5885 | 1          | 0.5885 | 0 | 0 | 0 | 0.9659 | Ref        |
| LC035386 | Unassigned | Unassigned | Unassigned | 1202_0  | Clustered           | 2 VC_1202_0  | 2   | 1      | 1          | 1      | 0 | 0 | 0 |        | 1 Ref      |
| LC063634 | Unassigned | Unassigned | Unassigned | 984_0   | Clustered           | 38 VC_984_0  | 38  | 0.9758 | 1          | 0.9758 | 0 | 0 | 0 |        | 1 Ref      |
| LC064302 | Unassigned | Unassigned | Unassigned | 839_0   | Clustered           | 5 VC_839_0   | 5   | 0.165  | 0.99999995 | 0.165  | 0 | 0 | 0 |        | 1 Ref      |
| LC066596 | Unassigned | Unassigned | Unassigned | 54_0    | Clustered           | 6 VC_54_0    | 6   | 0.6725 | 0.9999999  | 0.6725 | 0 | 0 | 0 |        | 1 Ref      |
| LC102729 | Unassigned | Unassigned | Unassigned | 174_0   | Clustered           | 3 VC_174_0   | 3   | 0.9624 | 0.99333557 | 0.9559 | 0 | 0 | 0 |        | 1 Ref      |
| LC102730 | Unassigned | Unassigned | Unassigned | 79_0    | Clustered           | 64 VC_79_0   | 64  | 0.4185 | 1          | 0.4185 | 0 | 0 | 0 | 0.7649 | Ref        |
| LC105987 | Unassigned | Unassigned | Unassigned | 79_0    | Clustered           | 64 VC_79_0   | 64  | 0.4185 | 1          | 0.4185 | 0 | 0 | 0 |        | 0.7649 Ref |
| LC105988 | Unassigned | Unassigned | Unassigned | 79_0    | Clustered           | 64 VC_79_0   | 64  | 0.4185 | 1          | 0.4185 | 0 | 0 | 0 |        | 0.7649 Ref |
| LC105989 | Unassigned | Unassigned | Unassigned | 79_0    | Clustered           | 64 VC_79_0   | 64  | 0.4185 | 1          | 0.4185 | 0 | 0 | 0 |        | 0.7649 Ref |
| LC105990 | Unassigned | Unassigned | Unassigned | 79_0    | Clustered           | 64 VC_79_0   | 64  | 0.4185 | 1          | 0.4185 | 0 | 0 | 0 |        | 0.7649 Ref |
| LC168164 | Unassigned | Unassigned | Unassigned | 532_1   | Clustered/Singleton | 1 VC_532_1   | 1   | 0      | 1          | 0      | 0 | 0 | 0 |        | 1 Ref      |
| LC210520 | Unassigned | Unassigned | Unassigned | 1202_0  | Clustered           | 2 VC_1202_0  | 2   | 1      | 1          | 1      | 0 | 0 | 0 |        | 1 Ref      |
| LC348379 | Unassigned | Unassigned | Unassigned | 283_182 | Clustered/Singleton | 1 VC_283_182 | 1   | 0      | 1          | 0      | 0 | 0 | 0 |        | 1 Ref      |
| LC348380 | Unassigned | Unassigned | Unassigned | 283_92  | Clustered           | 4 VC_283_92  | 4   | 0.0079 | 0.9999582  | 0.0079 | 0 | 0 | 0 |        | 1 Ref      |
| LC373201 | Unassigned | Unassigned | Unassigned | 131_2   | Clustered           | 7 VC_131_2   | 7   | 0.0685 | 1          | 0.0685 | 0 | 0 | 0 | 0.9048 | Ref        |
| LC375533 | Unassigned | Unassigned | Unassigned | 984_0   | Clustered           | 38 VC_984_0  | 38  | 0.9758 | 1          | 0.9758 | 0 | 0 | 0 |        | 1 Ref      |
| LC413193 | Unassigned | Unassigned | Unassigned | 823_0   | Clustered           | 124 VC_823_0 | 124 | 0.9492 | 1          | 0.9492 | 0 | 0 | 0 |        | 1 Ref      |
| LC413194 | Unassigned | Unassigned | Unassigned | 823_0   | Clustered           | 124 VC_823_0 | 124 | 0.9492 | 1          | 0.9492 | 0 | 0 | 0 |        | 1 Ref      |
| LC413195 | Unassigned | Unassigned | Unassigned | 823_0   | Clustered           | 124 VC_823_0 | 124 | 0.9492 | 1          | 0.9492 | 0 | 0 | 0 |        | 1 Ref      |
| LC465543 | Unassigned | Unassigned | Unassigned | 283_15  | Clustered/Singleton | 1 VC_283_15  | 1   | 0      | 1          | 0      | 0 | 0 | 0 |        | 1 Ref      |
| LC472881 | Unassigned | Unassigned | Unassigned | 79_1    | Clustered           | 2 VC_79_1    | 2   | 0.006  | 0.95748743 | 0.0057 | 0 | 0 | 0 |        | 1 Ref      |
| LC472882 | Unassigned | Unassigned | Unassigned | 80_0    | Clustered           | 41 VC_80_0   | 41  | 0.5837 | 1          | 0.5837 | 0 | 0 | 0 | 0.9805 | Ref        |
| LC472883 | Unassigned | Unassigned | Unassigned | 79_0    | Clustered           | 64 VC_79_0   | 64  | 0.4185 | 1          | 0.4185 | 0 | 0 | 0 |        | 0.7649 Ref |
| LC472884 | Unassigned | Unassigned | Unassigned | 79_0    | Clustered           | 64 VC_79_0   | 64  | 0.4185 | 1          | 0.4185 | 0 | 0 | 0 |        | 0.7649 Ref |
| LC473039 | Unassigned | Unassigned | Unassigned | 329_8   | Clustered           | 2 VC_329_8   | 2   | 0.0048 | 0.95654014 | 0.0046 | 0 | 0 | 0 |        | 1 Ref      |
| LC487410 | Unassigned | Unassigned | Unassigned | 971_1   | Clustered           | 24 VC_971_1  | 24  | 0.7393 | 1          | 0.7393 | 0 | 0 | 0 | 0.8913 | Ref        |
| LC492751 | Unassigned | Unassigned | Unassigned | 153_0   | Clustered           | 25 VC_153_0  | 25  | 0.7729 | 1          | 0.7729 | 0 | 0 | 0 |        | 1 Ref      |
| LC492752 | Unassigned | Unassigned | Unassigned | 153_0   | Clustered           | 25 VC_153_0  | 25  | 0.7729 | 1          | 0.7729 | 0 | 0 | 0 |        | 1 Ref      |
| LC494302 | Unassigned | Unassigned | Unassigned | 164_11  | Clustered           | 10 VC_164_11 | 10  | 0.1507 | 1          | 0.1507 | 0 | 0 | 0 | 0.9111 | Ref        |
| LC507823 | Unassigned | Unassigned | Unassigned | 637_0   | Clustered           | 115 VC_637_0 | 115 | 0.731  | 1          | 0.731  | 0 | 0 | 0 | 0.8764 | Ref        |
| LC516895 | Unassigned | Unassigned | Unassigned | 575_0   | Clustered           | 35 VC_575_0  | 35  | 0.8815 | 1          | 0.8815 | 0 | 0 | 0 |        | 1 Ref      |
| LC519489 | Unassigned | Unassigned | Unassigned | 329_7   | Clustered           | 18 VC_329_7  | 18  | 0.0938 | 1          | 0.0938 | 0 | 0 | 0 | 0.7778 | Ref        |
| LC519601 | Unassigned | Unassigned | Unassigned | 812_1   | Clustered           | 4 VC_812_1   | 4   | 0.2266 | 0.99998426 | 0.2266 | 0 | 0 | 0 |        | 1 Ref      |
| LC528882 | Unassigned | Unassigned | Unassigned | 3_0     | Clustered           | 17 VC_3_0    | 17  | 0.5639 | 1          | 0.5639 | 0 | 0 | 0 |        | 1 Ref      |
| LC541428 | Unassigned | Unassigned | Unassigned | 8_0     | Clustered           | 58 VC_8_0    | 58  | 0.8306 | 1          | 0.8306 | 0 | 0 | 0 | 0.9946 | Ref        |
| LC545443 | Unassigned | Unassigned | Unassigned | 118_0   | Clustered           | 3 VC_118_0   | 3   | 0.7119 | 0.99211494 | 0.7063 | 0 | 0 | 0 |        | 1 Ref      |
| LC545444 | Unassigned | Unassigned | Unassigned | 118_0   | Clustered           | 3 VC_118_0   | 3   | 0.7119 | 0.99211494 | 0.7063 | 0 | 0 | 0 |        | 1 Ref      |
| LC545445 | Unassigned | Unassigned | Unassigned | 119_0   | Clustered           | 2 VC_119_0   | 2   | 0.5516 | 0.91840661 | 0.5066 | 0 | 0 | 0 |        | 1 Ref      |
| LC545446 | Unassigned | Unassigned | Unassigned | 119_0   | Clustered           | 2 VC_119_0   | 2   | 0.5516 | 0.91840661 | 0.5066 | 0 | 0 | 0 |        | 1 Ref      |
| LC547238 | Unassigned | Unassigned | Unassigned | 108_0   | Clustered           | 33 VC_108_0  | 33  | 0.949  | 1          | 0.949  | 0 | 0 | 0 |        | 1 Ref      |
| LC552830 | Unassigned | Unassigned | Unassigned | 749_0   | Clustered           | 40 VC_749_0  | 40  | 0.7517 | 1          | 0.7517 | 0 | 0 | 0 |        | 1 Ref      |
| LC553734 | Unassigned | Unassigned | Unassigned | 813_0   | Clustered           | 12 VC_813_0  | 12  | 0.2347 | 1          | 0.2347 | 0 | 0 | 0 |        | 1 Ref      |
| LC553735 | Unassigned | Unassigned | Unassigned | 813_1   | Clustered           | 24 VC_813_1  | 24  | 0.535  | 1          | 0.535  | 0 | 0 | 0 |        | 1 Ref      |
| LC553736 | Unassigned | Unassigned | Unassigned | 592_0   | Clustered           | 50 VC_592_0  | 50  | 0.7314 | 1          | 0.7314 | 0 | 0 | 0 |        | 1 Ref      |
| LC567830 | Unassigned | Unassigned | Unassigned | 40_0    | Clustered           | 5 VC_40_0    | 5   | 0.0844 | 0.99999995 | 0.0844 | 0 | 0 | 0 |        | 1 Ref      |
| LC567838 | Unassigned | Unassigned | Unassigned | 40_0    | Clustered           | 5 VC_40_0    | 5   | 0.0844 | 0.99999995 | 0.0844 | 0 | 0 | 0 |        | 1 Ref      |
| LC567842 | Unassigned | Unassigned | Unassigned | 40_0    | Clustered           | 5 VC_40_0    | 5   | 0.0844 | 0.99999995 | 0.0844 | 0 | 0 | 0 |        | 1 Ref      |
| LC574321 | Unassigned | Unassigned | Unassigned | 149_15  | Clustered           | 16 VC_149_15 | 16  | 0.0788 | 1          | 0.0788 | 0 | 0 | 0 | 0.8083 | Ref        |
| LC576631 | Unassigned | Unassigned | Unassigned | 153_1   | Clustered/Singleton | 1 VC_153_1   | 1   | 0      | 1          | 0      | 0 | 0 | 0 |        | 1 Ref      |
| LC589952 | Unassigned | Unassigned | Unassigned | 669_0   | Clustered           | 21 VC_669_0  | 21  | 0.3623 | 1          | 0.3623 | 0 | 0 | 0 |        | 1 Ref      |
| LC596377 | Unassigned | Unassigned | Unassigned | 91_0    | Clustered           | 22 VC_91_0   | 22  | 0.5318 | 1          | 0.5318 | 0 | 0 | 0 |        | 1 Ref      |
| LC596378 | Unassigned | Unassigned | Unassigned | 91_0    | Clustered           | 22 VC_91_0   | 22  | 0.5318 | 1          | 0.5318 | 0 | 0 | 0 |        | 1 Ref      |
| LC596379 | Unassigned | Unassigned | Unassigned | 91_0    | Clustered           | 22 VC_91_0   | 22  | 0.5318 | 1          | 0.5318 | 0 | 0 | 0 |        | 1 Ref      |
| LC597490 | Unassigned | Unassigned | Unassigned | 90_0    | Clustered/Singleton | 1 VC_90_0    | 1   | 0      | 1          | 0      | 0 | 0 | 0 |        | 1 Ref      |
| LC616031 | Unassigned | Unassigned | Unassigned | 47_0    | Clustered           | 48 VC_47_0   | 48  | 0.7783 | 1          | 0.7783 | 0 | 0 | 0 |        | 1 Ref      |
| LC616032 | Unassigned | Unassigned | Unassigned | 47_0    | Clustered           | 48 VC_47_0   | 48  | 0.7783 | 1          | 0.7783 | 0 | 0 | 0 |        | 1 Ref      |
| LC616033 | Unassigned | Unassigned | Unassigned | 47_0    | Clustered           | 48 VC_47_0   | 48  | 0.7783 | 1          | 0.7783 | 0 | 0 | 0 |        | 1 Ref      |
| LC616034 | Unassigned | Unassigned | Unassigned | 47_0    | Clustered           | 48 VC_47_0   | 48  | 0.7783 | 1          | 0.7783 | 0 | 0 | 0 |        | 1 Ref      |
| LC616035 | Unassigned | Unassigned | Unassigned | 47_0    | Clustered           | 48 VC_47_0   | 48  | 0.7783 | 1          | 0.7783 | 0 | 0 | 0 |        | 1 Ref      |
| LC616036 | Unassigned | Unassigned | Unassigned | 47_0    | Clustered           | 48 VC_47_0   | 48  | 0.7783 | 1          | 0.7783 | 0 | 0 | 0 |        | 1 Ref      |
| LC616037 | Unassigned | Unassigned | Unassigned | 47_0    | Clustered           | 48 VC_47_0   | 48  | 0.7783 | 1          | 0.7783 | 0 | 0 | 0 |        | 1 Ref      |
| LC616038 | Unassigned | Unassigned | Unassigned | 47_0    | Clustered           | 48 VC_47_0   | 48  | 0.7783 | 1          | 0.7783 | 0 | 0 | 0 |        | 1 Ref      |
| LC616039 | Unassigned | Unassigned | Unassigned | 47_0    | Clustered           | 48 VC_47_0   | 48  | 0.7783 | 1          | 0.7783 | 0 | 0 | 0 |        | 1 Ref      |
| LC616040 | Unassigned | Unassigned | Unassigned | 47_0    | Clustered           | 48 VC_47_0   | 48  | 0.7783 | 1          | 0.7783 | 0 | 0 | 0 |        | 1 Ref      |
| LC616041 | Unassigned | Unassigned | Unassigned | 47_0    | Clustered           | 48 VC_47_0   | 48  | 0.7783 | 1          | 0.7783 | 0 | 0 | 0 |        | 1 Ref      |
| LC616042 | Unassigned | Unassigned | Unassigned | 47_0    | Clustered           | 48 VC_47_0   | 48  | 0.7783 | 1          | 0.7783 | 0 | 0 | 0 |        | 1 Ref      |
| LC616043 | Unassigned | Unassigned | Unassigned | 47_0    | Clustered           | 48 VC_47_0   | 48  | 0.7783 | 1          | 0.7783 | 0 | 0 | 0 |        | 1 Ref      |
| LC616044 | Unassigned | Unassigned | Unassigned | 47_0    | Clustered           | 48 VC_47_0   | 48  | 0.7783 | 1          | 0.7783 | 0 | 0 | 0 |        | 1 Ref      |
| LC616045 | Unassigned | Unassigned | Unassigned | 47_0    | Clustered           | 48 VC_47_0   | 48  | 0.7783 | 1          | 0.7783 | 0 | 0 | 0 |        | 1 Ref      |
| LC616046 | Unassigned | Unassigned | Unassigned | 47_0    | Clustered           | 48 VC_47_0   | 48  | 0.7783 | 1          | 0.7783 | 0 | 0 | 0 |        | 1 Ref      |
| LC616047 | Unassigned | Unassigned | Unassigned | 47_0    | Clustered           | 48 VC_47_0   | 48  | 0.7783 | 1          | 0.7783 | 0 | 0 | 0 |        | 1 Ref      |
| LC616048 | Unassigned | Unassigned | Unassigned | 47_0    | Clustered           | 48 VC_47_0   | 48  | 0.7783 | 1          | 0.7783 | 0 | 0 | 0 |        | 1 Ref      |



[illegible]



|          |            |            |            |        |                     |              |     |        |            |        |   |   |   |            |
|----------|------------|------------|------------|--------|---------------------|--------------|-----|--------|------------|--------|---|---|---|------------|
| LC647030 | Unassigned | Unassigned | Unassigned | 152_0  | Clustered/Singleton | 1 VC_152_0   | 1   | 0      | 1          | 0      | 0 | 0 | 0 | 1 Ref      |
| LC648442 | Unassigned | Unassigned | Unassigned | 149_7  | Clustered/Singleton | 1 VC_149_7   | 1   | 0      | 1          | 0      | 0 | 0 | 0 | 1 Ref      |
| LC648443 | Unassigned | Unassigned | Unassigned | 472_0  | Clustered           | 47 VC_472_0  | 47  | 0.9025 | 1          | 0.9025 | 0 | 0 | 0 | 1 Ref      |
| LC659915 | Unassigned | Unassigned | Unassigned | 191_19 | Clustered           | 12 VC_191_19 | 12  | 0.0655 | 1          | 0.0655 | 0 | 0 | 0 | 0.8636 Ref |
| LC667452 | Unassigned | Unassigned | Unassigned | 3_0    | Clustered           | 17 VC_3_0    | 17  | 0.5639 | 1          | 0.5639 | 0 | 0 | 0 | 1 Ref      |
| LC680884 | Unassigned | Unassigned | Unassigned | 448_0  | Clustered           | 4 VC_448_0   | 4   | 0.3059 | 0.99978853 | 0.3058 | 0 | 0 | 0 | 1 Ref      |
| LC680885 | Unassigned | Unassigned | Unassigned | 449_0  | Clustered           | 7 VC_449_0   | 7   | 0.6015 | 1          | 0.6015 | 0 | 0 | 0 | 1 Ref      |
| LC709172 | Unassigned | Unassigned | Unassigned | 96_0   | Clustered           | 30 VC_96_0   | 30  | 0.718  | 1          | 0.718  | 0 | 0 | 0 | 1 Ref      |
| LC727695 | Unassigned | Unassigned | Unassigned | 344_0  | Clustered           | 21 VC_344_0  | 21  | 0.5436 | 1          | 0.5436 | 0 | 0 | 0 | 1 Ref      |
| LC727696 | Unassigned | Unassigned | Unassigned | 344_0  | Clustered           | 21 VC_344_0  | 21  | 0.5436 | 1          | 0.5436 | 0 | 0 | 0 | 1 Ref      |
| LC727697 | Unassigned | Unassigned | Unassigned | 165_0  | Clustered           | 4 VC_165_0   | 4   | 0.2247 | 0.99998328 | 0.2247 | 0 | 0 | 0 | 1 Ref      |
| LC727698 | Unassigned | Unassigned | Unassigned | 165_0  | Clustered           | 4 VC_165_0   | 4   | 0.2247 | 0.99998328 | 0.2247 | 0 | 0 | 0 | 1 Ref      |
| LC727699 | Unassigned | Unassigned | Unassigned | 344_0  | Clustered           | 21 VC_344_0  | 21  | 0.5436 | 1          | 0.5436 | 0 | 0 | 0 | 1 Ref      |
| LC727700 | Unassigned | Unassigned | Unassigned | 423_0  | Clustered           | 45 VC_423_0  | 45  | 0.9484 | 1          | 0.9484 | 0 | 0 | 0 | 1 Ref      |
| LC727701 | Unassigned | Unassigned | Unassigned | 344_0  | Clustered           | 21 VC_344_0  | 21  | 0.5436 | 1          | 0.5436 | 0 | 0 | 0 | 1 Ref      |
| LC727840 | Unassigned | Unassigned | Unassigned | 49_0   | Clustered           | 36 VC_49_0   | 36  | 0.611  | 1          | 0.611  | 0 | 0 | 0 | 1 Ref      |
| LC727841 | Unassigned | Unassigned | Unassigned | 49_0   | Clustered           | 36 VC_49_0   | 36  | 0.611  | 1          | 0.611  | 0 | 0 | 0 | 1 Ref      |
| LC727842 | Unassigned | Unassigned | Unassigned | 49_0   | Clustered           | 36 VC_49_0   | 36  | 0.611  | 1          | 0.611  | 0 | 0 | 0 | 1 Ref      |
| LC727843 | Unassigned | Unassigned | Unassigned | 49_0   | Clustered           | 36 VC_49_0   | 36  | 0.611  | 1          | 0.611  | 0 | 0 | 0 | 1 Ref      |
| LC727844 | Unassigned | Unassigned | Unassigned | 49_0   | Clustered           | 36 VC_49_0   | 36  | 0.611  | 1          | 0.611  | 0 | 0 | 0 | 1 Ref      |
| LC727845 | Unassigned | Unassigned | Unassigned | 49_0   | Clustered           | 36 VC_49_0   | 36  | 0.611  | 1          | 0.611  | 0 | 0 | 0 | 1 Ref      |
| LC727846 | Unassigned | Unassigned | Unassigned | 49_0   | Clustered           | 36 VC_49_0   | 36  | 0.611  | 1          | 0.611  | 0 | 0 | 0 | 1 Ref      |
| LC727847 | Unassigned | Unassigned | Unassigned | 49_0   | Clustered           | 36 VC_49_0   | 36  | 0.611  | 1          | 0.611  | 0 | 0 | 0 | 1 Ref      |
| LC727848 | Unassigned | Unassigned | Unassigned | 49_0   | Clustered           | 36 VC_49_0   | 36  | 0.611  | 1          | 0.611  | 0 | 0 | 0 | 1 Ref      |
| LC727849 | Unassigned | Unassigned | Unassigned | 49_0   | Clustered           | 36 VC_49_0   | 36  | 0.611  | 1          | 0.611  | 0 | 0 | 0 | 1 Ref      |
| LC727850 | Unassigned | Unassigned | Unassigned | 49_0   | Clustered           | 36 VC_49_0   | 36  | 0.611  | 1          | 0.611  | 0 | 0 | 0 | 1 Ref      |
| LC727851 | Unassigned | Unassigned | Unassigned | 49_0   | Clustered           | 36 VC_49_0   | 36  | 0.611  | 1          | 0.611  | 0 | 0 | 0 | 1 Ref      |
| LC727852 | Unassigned | Unassigned | Unassigned | 49_0   | Clustered           | 36 VC_49_0   | 36  | 0.611  | 1          | 0.611  | 0 | 0 | 0 | 1 Ref      |
| LC727853 | Unassigned | Unassigned | Unassigned | 49_0   | Clustered           | 36 VC_49_0   | 36  | 0.611  | 1          | 0.611  | 0 | 0 | 0 | 1 Ref      |
| LC727854 | Unassigned | Unassigned | Unassigned | 49_0   | Clustered           | 36 VC_49_0   | 36  | 0.611  | 1          | 0.611  | 0 | 0 | 0 | 1 Ref      |
| LC727855 | Unassigned | Unassigned | Unassigned | 49_0   | Clustered           | 36 VC_49_0   | 36  | 0.611  | 1          | 0.611  | 0 | 0 | 0 | 1 Ref      |
| LC727856 | Unassigned | Unassigned | Unassigned | 49_0   | Clustered           | 36 VC_49_0   | 36  | 0.611  | 1          | 0.611  | 0 | 0 | 0 | 1 Ref      |
| LC727857 | Unassigned | Unassigned | Unassigned | 49_0   | Clustered           | 36 VC_49_0   | 36  | 0.611  | 1          | 0.611  | 0 | 0 | 0 | 1 Ref      |
| LC727858 | Unassigned | Unassigned | Unassigned | 49_0   | Clustered           | 36 VC_49_0   | 36  | 0.611  | 1          | 0.611  | 0 | 0 | 0 | 1 Ref      |
| LC727859 | Unassigned | Unassigned | Unassigned | 49_0   | Clustered           | 36 VC_49_0   | 36  | 0.611  | 1          | 0.611  | 0 | 0 | 0 | 1 Ref      |
| LC727860 | Unassigned | Unassigned | Unassigned | 49_0   | Clustered           | 36 VC_49_0   | 36  | 0.611  | 1          | 0.611  | 0 | 0 | 0 | 1 Ref      |
| LC727861 | Unassigned | Unassigned | Unassigned | 49_0   | Clustered           | 36 VC_49_0   | 36  | 0.611  | 1          | 0.611  | 0 | 0 | 0 | 1 Ref      |
| LC727862 | Unassigned | Unassigned | Unassigned | 49_0   | Clustered           | 36 VC_49_0   | 36  | 0.611  | 1          | 0.611  | 0 | 0 | 0 | 1 Ref      |
| LC727863 | Unassigned | Unassigned | Unassigned | 49_0   | Clustered           | 36 VC_49_0   | 36  | 0.611  | 1          | 0.611  | 0 | 0 | 0 | 1 Ref      |
| LC727864 | Unassigned | Unassigned | Unassigned | 49_0   | Clustered           | 36 VC_49_0   | 36  | 0.611  | 1          | 0.611  | 0 | 0 | 0 | 1 Ref      |
| LC727865 | Unassigned | Unassigned | Unassigned | 49_0   | Clustered           | 36 VC_49_0   | 36  | 0.611  | 1          | 0.611  | 0 | 0 | 0 | 1 Ref      |
| LC727866 | Unassigned | Unassigned | Unassigned | 49_0   | Clustered           | 36 VC_49_0   | 36  | 0.611  | 1          | 0.611  | 0 | 0 | 0 | 1 Ref      |
| LC727867 | Unassigned | Unassigned | Unassigned | 49_0   | Clustered           | 36 VC_49_0   | 36  | 0.611  | 1          | 0.611  | 0 | 0 | 0 | 1 Ref      |
| LC727868 | Unassigned | Unassigned | Unassigned | 49_0   | Clustered           | 36 VC_49_0   | 36  | 0.611  | 1          | 0.611  | 0 | 0 | 0 | 1 Ref      |
| LC727869 | Unassigned | Unassigned | Unassigned | 49_0   | Clustered           | 36 VC_49_0   | 36  | 0.611  | 1          | 0.611  | 0 | 0 | 0 | 1 Ref      |
| LC727870 | Unassigned | Unassigned | Unassigned | 49_0   | Clustered           | 36 VC_49_0   | 36  | 0.611  | 1          | 0.611  | 0 | 0 | 0 | 1 Ref      |
| LC727871 | Unassigned | Unassigned | Unassigned | 49_0   | Clustered           | 36 VC_49_0   | 36  | 0.611  | 1          | 0.611  | 0 | 0 | 0 | 1 Ref      |
| LC727872 | Unassigned | Unassigned | Unassigned | 49_0   | Clustered           | 36 VC_49_0   | 36  | 0.611  | 1          | 0.611  | 0 | 0 | 0 | 1 Ref      |
| LC727873 | Unassigned | Unassigned | Unassigned | 49_0   | Clustered           | 36 VC_49_0   | 36  | 0.611  | 1          | 0.611  | 0 | 0 | 0 | 1 Ref      |
| LC727874 | Unassigned | Unassigned | Unassigned | 49_0   | Clustered           | 36 VC_49_0   | 36  | 0.611  | 1          | 0.611  | 0 | 0 | 0 | 1 Ref      |
| LC727875 | Unassigned | Unassigned | Unassigned | 49_0   | Clustered           | 36 VC_49_0   | 36  | 0.611  | 1          | 0.611  | 0 | 0 | 0 | 1 Ref      |
| LC727891 | Unassigned | Unassigned | Unassigned | 41_0   | Clustered           | 16 VC_41_0   | 16  | 0.2025 | 1          | 0.2025 | 0 | 0 | 0 | 0.9667 Ref |
| LC727892 | Unassigned | Unassigned | Unassigned | 41_0   | Clustered           | 16 VC_41_0   | 16  | 0.2025 | 1          | 0.2025 | 0 | 0 | 0 | 0.9667 Ref |
| LC727893 | Unassigned | Unassigned | Unassigned | 41_0   | Clustered           | 16 VC_41_0   | 16  | 0.2025 | 1          | 0.2025 | 0 | 0 | 0 | 0.9667 Ref |
| LC727894 | Unassigned | Unassigned | Unassigned | 41_0   | Clustered           | 16 VC_41_0   | 16  | 0.2025 | 1          | 0.2025 | 0 | 0 | 0 | 0.9667 Ref |
| LC727895 | Unassigned | Unassigned | Unassigned | 41_0   | Clustered           | 16 VC_41_0   | 16  | 0.2025 | 1          | 0.2025 | 0 | 0 | 0 | 0.9667 Ref |
| LC727896 | Unassigned | Unassigned | Unassigned | 41_0   | Clustered           | 16 VC_41_0   | 16  | 0.2025 | 1          | 0.2025 | 0 | 0 | 0 | 0.9667 Ref |
| LC727897 | Unassigned | Unassigned | Unassigned | 41_0   | Clustered           | 16 VC_41_0   | 16  | 0.2025 | 1          | 0.2025 | 0 | 0 | 0 | 0.9667 Ref |
| LC727898 | Unassigned | Unassigned | Unassigned | 41_0   | Clustered           | 16 VC_41_0   | 16  | 0.2025 | 1          | 0.2025 | 0 | 0 | 0 | 0.9667 Ref |
| LC727899 | Unassigned | Unassigned | Unassigned | 41_0   | Clustered           | 16 VC_41_0   | 16  | 0.2025 | 1          | 0.2025 | 0 | 0 | 0 | 0.9667 Ref |
| LC727900 | Unassigned | Unassigned | Unassigned | 41_0   | Clustered           | 16 VC_41_0   | 16  | 0.2025 | 1          | 0.2025 | 0 | 0 | 0 | 0.9667 Ref |
| LC727901 | Unassigned | Unassigned | Unassigned | 41_0   | Clustered           | 16 VC_41_0   | 16  | 0.2025 | 1          | 0.2025 | 0 | 0 | 0 | 0.9667 Ref |
| LC727902 | Unassigned | Unassigned | Unassigned | 41_0   | Clustered           | 16 VC_41_0   | 16  | 0.2025 | 1          | 0.2025 | 0 | 0 | 0 | 0.9667 Ref |
| LC727903 | Unassigned | Unassigned | Unassigned | 42_0   | Clustered           | 49 VC_42_0   | 49  | 0.4517 | 1          | 0.4517 | 0 | 0 | 0 | 0.8597 Ref |
| LC730317 | Unassigned | Unassigned | Unassigned | 513_0  | Clustered           | 32 VC_513_0  | 32  | 0.6881 | 1          | 0.6881 | 0 | 0 | 0 | 1 Ref      |
| LC730318 | Unassigned | Unassigned | Unassigned | 215_1  | Clustered           | 19 VC_215_1  | 19  | 0.4188 | 1          | 0.4188 | 0 | 0 | 0 | 1 Ref      |
| LC730319 | Unassigned | Unassigned | Unassigned | 129_0  | Clustered           | 43 VC_129_0  | 43  | 0.886  | 1          | 0.886  | 0 | 0 | 0 | 1 Ref      |
| LC730320 | Unassigned | Unassigned | Unassigned | 216_6  | Clustered           | 42 VC_216_6  | 42  | 0.473  | 1          | 0.473  | 0 | 0 | 0 | 0.8351 Ref |
| LC730321 | Unassigned | Unassigned | Unassigned | 43_0   | Clustered           | 38 VC_43_0   | 38  | 0.5885 | 1          | 0.5885 | 0 | 0 | 0 | 0.9659 Ref |
| LC730322 | Unassigned | Unassigned | Unassigned | 28_1   | Clustered           | 53 VC_28_1   | 53  | 0.7164 | 1          | 0.7164 | 0 | 0 | 0 | 0.9325 Ref |
| LC730323 | Unassigned | Unassigned | Unassigned | 452_0  | Clustered           | 66 VC_452_0  | 66  | 0.9248 | 1          | 0.9248 | 0 | 0 | 0 | 1 Ref      |
| LC730324 | Unassigned | Unassigned | Unassigned | 385_0  | Clustered           | 51 VC_385_0  | 51  | 0.8754 | 1          | 0.8754 | 0 | 0 | 0 | 1 Ref      |
| LC730325 | Unassigned | Unassigned | Unassigned | 392_0  | Clustered           | 126 VC_392_0 | 126 | 0.9621 | 1          | 0.9621 | 0 | 0 | 0 | 1 Ref      |
| LC739530 | Unassigned | Unassigned | Unassigned | 329_20 | Clustered           | 4 VC_329_20  | 4   | 0.0174 | 0.99998777 | 0.0174 | 0 | 0 | 0 | 1 Ref      |
| LC739531 | Unassigned | Unassigned | Unassigned | 329_20 | Clustered           | 4 VC_329_20  | 4   | 0.0174 | 0.99998777 | 0.0174 | 0 | 0 | 0 | 1 Ref      |
| LC739532 | Unassigned | Unassigned | Unassigned | 329_20 | Clustered           | 4 VC_329_20  | 4   | 0.0174 | 0.99998777 | 0.0174 | 0 | 0 | 0 | 1 Ref      |
| LC739533 | Unassigned | Unassigned | Unassigned | 847_0  | Clustered           | 5 VC_847_0   | 5   | 0.0621 | 0.99921937 | 0.0621 | 0 | 0 | 0 | 1 Ref      |
| LC739534 | Unassigned | Unassigned | Unassigned | 847_0  | Clustered           | 5 VC_847_0   | 5   | 0.0621 | 0.99921937 | 0.0621 | 0 | 0 | 0 | 1 Ref      |
| LC739535 | Unassigned | Unassigned | Unassigned | 847_0  | Clustered           | 5 VC_847_0   | 5   | 0.0621 | 0.99921937 | 0.0621 | 0 | 0 | 0 | 1 Ref      |
| LC739536 | Unassigned | Unassigned | Unassigned | 848_0  | Clustered           | 28 VC_848_0  | 28  | 0.7927 | 1          | 0.7927 | 0 | 0 | 0 | 1 Ref      |
| LC739537 | Unassigned | Unassigned | Unassigned | 847_0  | Clustered           | 5 VC_847_0   | 5   | 0.0621 | 0.99921937 | 0.0621 | 0 | 0 | 0 | 1 Ref      |



|          |            |            |            |        |                     |              |     |        |            |        |   |   |   |        |     |
|----------|------------|------------|------------|--------|---------------------|--------------|-----|--------|------------|--------|---|---|---|--------|-----|
| LC739538 | Unassigned | Unassigned | Unassigned | 772_16 | Clustered           | 10 VC_772_16 | 10  | 0.0563 | 0.9434928  | 0.0531 | 0 | 0 | 0 | 0.8667 | Ref |
| LC739539 | Unassigned | Unassigned | Unassigned | 847_0  | Clustered           | 5 VC_847_0   | 5   | 0.0621 | 0.99921937 | 0.0621 | 0 | 0 | 0 | 1      | Ref |
| LC739540 | Unassigned | Unassigned | Unassigned | 772_16 | Clustered           | 10 VC_772_16 | 10  | 0.0563 | 0.9434928  | 0.0531 | 0 | 0 | 0 | 0.8667 | Ref |
| LC739541 | Unassigned | Unassigned | Unassigned | 772_11 | Clustered           | 6 VC_772_11  | 6   | 0.0305 | 0.84253803 | 0.0257 | 0 | 0 | 0 | 0.8    | Ref |
| LC739542 | Unassigned | Unassigned | Unassigned | 772_11 | Clustered           | 6 VC_772_11  | 6   | 0.0305 | 0.84253803 | 0.0257 | 0 | 0 | 0 | 0.8    | Ref |
| LK392619 | Unassigned | Unassigned | Unassigned | 1048_0 | Clustered           | 3 VC_1048_0  | 3   | 1      | 1          | 1      | 0 | 0 | 0 | 1      | Ref |
| LK985321 | Unassigned | Unassigned | Unassigned | 647_0  | Clustered           | 11 VC_647_0  | 11  | 0.598  | 1          | 0.598  | 0 | 0 | 0 | 1      | Ref |
| LK985322 | Unassigned | Unassigned | Unassigned | 139_0  | Clustered           | 2 VC_139_0   | 2   | 0.0701 | 0.95510185 | 0.067  | 0 | 0 | 0 | 1      | Ref |
| LN610572 | Unassigned | Unassigned | Unassigned | 76_0   | Clustered           | 37 VC_76_0   | 37  | 0.9403 | 1          | 0.9403 | 0 | 0 | 0 | 1      | Ref |
| LN610573 | Unassigned | Unassigned | Unassigned | 77_0   | Clustered           | 20 VC_77_0   | 20  | 0.9657 | 1          | 0.9657 | 0 | 0 | 0 | 1      | Ref |
| LN610574 | Unassigned | Unassigned | Unassigned | 423_0  | Clustered           | 45 VC_423_0  | 45  | 0.9484 | 1          | 0.9484 | 0 | 0 | 0 | 1      | Ref |
| LN610575 | Unassigned | Unassigned | Unassigned | 76_0   | Clustered           | 37 VC_76_0   | 37  | 0.9403 | 1          | 0.9403 | 0 | 0 | 0 | 1      | Ref |
| LN610576 | Unassigned | Unassigned | Unassigned | 77_0   | Clustered           | 20 VC_77_0   | 20  | 0.9657 | 1          | 0.9657 | 0 | 0 | 0 | 1      | Ref |
| LN610577 | Unassigned | Unassigned | Unassigned | 464_0  | Clustered           | 8 VC_464_0   | 8   | 0.2629 | 1          | 0.2629 | 0 | 0 | 0 | 1      | Ref |
| LN610578 | Unassigned | Unassigned | Unassigned | 472_0  | Clustered           | 47 VC_472_0  | 47  | 0.9025 | 1          | 0.9025 | 0 | 0 | 0 | 1      | Ref |
| LN610579 | Unassigned | Unassigned | Unassigned | 79_0   | Clustered           | 64 VC_79_0   | 64  | 0.4185 | 1          | 0.4185 | 0 | 0 | 0 | 0.7649 | Ref |
| LN610580 | Unassigned | Unassigned | Unassigned | 423_0  | Clustered           | 45 VC_423_0  | 45  | 0.9484 | 1          | 0.9484 | 0 | 0 | 0 | 1      | Ref |
| LN610581 | Unassigned | Unassigned | Unassigned | 77_0   | Clustered           | 20 VC_77_0   | 20  | 0.9657 | 1          | 0.9657 | 0 | 0 | 0 | 1      | Ref |
| LN610582 | Unassigned | Unassigned | Unassigned | 77_0   | Clustered           | 20 VC_77_0   | 20  | 0.9657 | 1          | 0.9657 | 0 | 0 | 0 | 1      | Ref |
| LN610583 | Unassigned | Unassigned | Unassigned | 77_0   | Clustered           | 20 VC_77_0   | 20  | 0.9657 | 1          | 0.9657 | 0 | 0 | 0 | 1      | Ref |
| LN610584 | Unassigned | Unassigned | Unassigned | 464_0  | Clustered           | 8 VC_464_0   | 8   | 0.2629 | 1          | 0.2629 | 0 | 0 | 0 | 1      | Ref |
| LN610585 | Unassigned | Unassigned | Unassigned | 464_0  | Clustered           | 8 VC_464_0   | 8   | 0.2629 | 1          | 0.2629 | 0 | 0 | 0 | 1      | Ref |
| LN610586 | Unassigned | Unassigned | Unassigned | 76_0   | Clustered           | 37 VC_76_0   | 37  | 0.9403 | 1          | 0.9403 | 0 | 0 | 0 | 1      | Ref |
| LN610587 | Unassigned | Unassigned | Unassigned | 76_0   | Clustered           | 37 VC_76_0   | 37  | 0.9403 | 1          | 0.9403 | 0 | 0 | 0 | 1      | Ref |
| LN610588 | Unassigned | Unassigned | Unassigned | 79_0   | Clustered           | 64 VC_79_0   | 64  | 0.4185 | 1          | 0.4185 | 0 | 0 | 0 | 0.7649 | Ref |
| LN610589 | Unassigned | Unassigned | Unassigned | 80_0   | Clustered           | 41 VC_80_0   | 41  | 0.5837 | 1          | 0.5837 | 0 | 0 | 0 | 0.9805 | Ref |
| LN610590 | Unassigned | Unassigned | Unassigned | 179_0  | Clustered           | 53 VC_179_0  | 53  | 0.9137 | 1          | 0.9137 | 0 | 0 | 0 | 1      | Ref |
| LN681534 | Unassigned | Unassigned | Unassigned | 766_0  | Clustered           | 2 VC_766_0   | 2   | 0.2674 | 0.94916107 | 0.2538 | 0 | 0 | 0 | 1      | Ref |
| LN681535 | Unassigned | Unassigned | Unassigned | 733_0  | Clustered           | 5 VC_733_0   | 5   | 0.5111 | 0.99999994 | 0.5111 | 0 | 0 | 0 | 1      | Ref |
| LN681536 | Unassigned | Unassigned | Unassigned | 733_0  | Clustered           | 5 VC_733_0   | 5   | 0.5111 | 0.99999994 | 0.5111 | 0 | 0 | 0 | 1      | Ref |
| LN681537 | Unassigned | Unassigned | Unassigned | 473_2  | Clustered           | 2 VC_473_2   | 2   | 0.1022 | 0.94602228 | 0.0966 | 0 | 0 | 0 | 1      | Ref |
| LN681538 | Unassigned | Unassigned | Unassigned | 647_0  | Clustered           | 11 VC_647_0  | 11  | 0.598  | 1          | 0.598  | 0 | 0 | 0 | 1      | Ref |
| LN681540 | Unassigned | Unassigned | Unassigned | 647_0  | Clustered           | 11 VC_647_0  | 11  | 0.598  | 1          | 0.598  | 0 | 0 | 0 | 1      | Ref |
| LN681541 | Unassigned | Unassigned | Unassigned | 139_1  | Clustered           | 4 VC_139_1   | 4   | 0.1775 | 0.99998609 | 0.1775 | 0 | 0 | 0 | 1      | Ref |
| LN681542 | Unassigned | Unassigned | Unassigned | 139_1  | Clustered           | 4 VC_139_1   | 4   | 0.1775 | 0.99998609 | 0.1775 | 0 | 0 | 0 | 1      | Ref |
| LN828717 | Unassigned | Unassigned | Unassigned | 433_5  | Clustered           | 2 VC_433_5   | 2   | 0.0173 | 0.93642158 | 0.0162 | 0 | 0 | 0 | 1      | Ref |
| LN866626 | Unassigned | Unassigned | Unassigned | 823_0  | Clustered           | 124 VC_823_0 | 124 | 0.9492 | 1          | 0.9492 | 0 | 0 | 0 | 1      | Ref |
| LN878149 | Unassigned | Unassigned | Unassigned | 878_0  | Clustered           | 32 VC_878_0  | 32  | 0.9965 | 1          | 0.9965 | 0 | 0 | 0 | 1      | Ref |
| LN881725 | Unassigned | Unassigned | Unassigned | 795_0  | Clustered           | 19 VC_795_0  | 19  | 0.6848 | 1          | 0.6848 | 0 | 0 | 0 | 1      | Ref |
| LN881726 | Unassigned | Unassigned | Unassigned | 283_33 | Clustered           | 4 VC_283_33  | 4   | 0.0075 | 0.99979471 | 0.0075 | 0 | 0 | 0 | 1      | Ref |
| LN881727 | Unassigned | Unassigned | Unassigned | 772_9  | Clustered           | 7 VC_772_9   | 7   | 0.0369 | 0.87705503 | 0.0324 | 0 | 0 | 0 | 1      | Ref |
| LN881728 | Unassigned | Unassigned | Unassigned | 283_73 | Clustered           | 3 VC_283_73  | 3   | 0.0052 | 0.9974555  | 0.0051 | 0 | 0 | 0 | 1      | Ref |
| LN881729 | Unassigned | Unassigned | Unassigned | 283_33 | Clustered           | 4 VC_283_33  | 4   | 0.0075 | 0.99979471 | 0.0075 | 0 | 0 | 0 | 1      | Ref |
| LN881730 | Unassigned | Unassigned | Unassigned | 835_0  | Clustered           | 67 VC_835_0  | 67  | 0.9624 | 1          | 0.9624 | 0 | 0 | 0 | 1      | Ref |
| LN881731 | Unassigned | Unassigned | Unassigned | 835_0  | Clustered           | 67 VC_835_0  | 67  | 0.9624 | 1          | 0.9624 | 0 | 0 | 0 | 1      | Ref |
| LN881732 | Unassigned | Unassigned | Unassigned | 283_37 | Clustered/Singleton | 1 VC_283_37  | 1   | 0      | 1          | 0      | 0 | 0 | 0 | 1      | Ref |
| LN881733 | Unassigned | Unassigned | Unassigned | 283_73 | Clustered           | 3 VC_283_73  | 3   | 0.0052 | 0.9974555  | 0.0051 | 0 | 0 | 0 | 1      | Ref |
| LN881734 | Unassigned | Unassigned | Unassigned | 283_33 | Clustered           | 4 VC_283_33  | 4   | 0.0075 | 0.99979471 | 0.0075 | 0 | 0 | 0 | 1      | Ref |
| LN881735 | Unassigned | Unassigned | Unassigned | 772_9  | Clustered           | 7 VC_772_9   | 7   | 0.0369 | 0.87705503 | 0.0324 | 0 | 0 | 0 | 1      | Ref |
| LN881736 | Unassigned | Unassigned | Unassigned | 283_73 | Clustered           | 3 VC_283_73  | 3   | 0.0052 | 0.9974555  | 0.0051 | 0 | 0 | 0 | 1      | Ref |
| LN881737 | Unassigned | Unassigned | Unassigned | 283_33 | Clustered           | 4 VC_283_33  | 4   | 0.0075 | 0.99979471 | 0.0075 | 0 | 0 | 0 | 1      | Ref |
| LN881738 | Unassigned | Unassigned | Unassigned | 733_0  | Clustered           | 5 VC_733_0   | 5   | 0.5111 | 0.99999994 | 0.5111 | 0 | 0 | 0 | 1      | Ref |
| LN887844 | Unassigned | Unassigned | Unassigned | 78_5   | Clustered           | 6 VC_78_5    | 6   | 0.1087 | 0.99978082 | 0.1087 | 0 | 0 | 0 | 1      | Ref |
| LN887948 | Unassigned | Unassigned | Unassigned | 190_20 | Clustered           | 4 VC_190_20  | 4   | 0.0229 | 0.99997885 | 0.0229 | 0 | 0 | 0 | 1      | Ref |
| LN889756 | Unassigned | Unassigned | Unassigned | 129_0  | Clustered           | 43 VC_129_0  | 43  | 0.886  | 1          | 0.886  | 0 | 0 | 0 | 1      | Ref |
| LN889995 | Unassigned | Unassigned | Unassigned | 129_0  | Clustered           | 43 VC_129_0  | 43  | 0.886  | 1          | 0.886  | 0 | 0 | 0 | 1      | Ref |
| LN898172 | Unassigned | Unassigned | Unassigned | 251_0  | Clustered           | 22 VC_251_0  | 22  | 0.6508 | 1          | 0.6508 | 0 | 0 | 0 | 1      | Ref |
| LN907801 | Unassigned | Unassigned | Unassigned | 179_0  | Clustered           | 53 VC_179_0  | 53  | 0.9137 | 1          | 0.9137 | 0 | 0 | 0 | 1      | Ref |
| LN913017 | Unassigned | Unassigned | Unassigned | 129_0  | Clustered           | 43 VC_129_0  | 43  | 0.886  | 1          | 0.886  | 0 | 0 | 0 | 1      | Ref |
| LN997803 | Unassigned | Unassigned | Unassigned | 245_0  | Clustered           | 10 VC_245_0  | 10  | 0.1805 | 1          | 0.1805 | 0 | 0 | 0 | 0.9778 | Ref |
| LR025195 | Unassigned | Unassigned | Unassigned | 795_0  | Clustered           | 19 VC_795_0  | 19  | 0.6848 | 1          | 0.6848 | 0 | 0 | 0 | 1      | Ref |
| LR025196 | Unassigned | Unassigned | Unassigned | 795_0  | Clustered           | 19 VC_795_0  | 19  | 0.6848 | 1          | 0.6848 | 0 | 0 | 0 | 1      | Ref |
| LR025197 | Unassigned | Unassigned | Unassigned | 795_0  | Clustered           | 19 VC_795_0  | 19  | 0.6848 | 1          | 0.6848 | 0 | 0 | 0 | 1      | Ref |
| LR025198 | Unassigned | Unassigned | Unassigned | 795_0  | Clustered           | 19 VC_795_0  | 19  | 0.6848 | 1          | 0.6848 | 0 | 0 | 0 | 1      | Ref |
| LR026998 | Unassigned | Unassigned | Unassigned | 592_0  | Clustered           | 50 VC_592_0  | 50  | 0.7314 | 1          | 0.7314 | 0 | 0 | 0 | 1      | Ref |
| LR027383 | Unassigned | Unassigned | Unassigned | 286_1  | Clustered           | 21 VC_286_1  | 21  | 0.1696 | 1          | 0.1696 | 0 | 0 | 0 | 0.9048 | Ref |
| LR027384 | Unassigned | Unassigned | Unassigned | 190_12 | Clustered/Singleton | 1 VC_190_12  | 1   | 0      | 1          | 0      | 0 | 0 | 0 | 1      | Ref |
| LR027385 | Unassigned | Unassigned | Unassigned | 942_0  | Clustered           | 36 VC_942_0  | 36  | 0.7848 | 1          | 0.7848 | 0 | 0 | 0 | 1      | Ref |
| LR027386 | Unassigned | Unassigned | Unassigned | 286_1  | Clustered           | 21 VC_286_1  | 21  | 0.1696 | 1          | 0.1696 | 0 | 0 | 0 | 0.9048 | Ref |
| LR027387 | Unassigned | Unassigned | Unassigned | 286_1  | Clustered           | 21 VC_286_1  | 21  | 0.1696 | 1          | 0.1696 | 0 | 0 | 0 | 0.9048 | Ref |
| LR027388 | Unassigned | Unassigned | Unassigned | 942_0  | Clustered           | 36 VC_942_0  | 36  | 0.7848 | 1          | 0.7848 | 0 | 0 | 0 | 1      | Ref |
| LR027389 | Unassigned | Unassigned | Unassigned | 191_14 | Clustered/Singleton | 1 VC_191_14  | 1   | 0      | 1          | 0      | 0 | 0 | 0 | 1      | Ref |
| LR027390 | Unassigned | Unassigned | Unassigned | 286_1  | Clustered           | 21 VC_286_1  | 21  | 0.1696 | 1          | 0.1696 | 0 | 0 | 0 | 0.9048 | Ref |
| LR027391 | Unassigned | Unassigned | Unassigned | 286_1  | Clustered           | 21 VC_286_1  | 21  | 0.1696 | 1          | 0.1696 | 0 | 0 | 0 | 0.9048 | Ref |
| LR031359 | Unassigned | Unassigned | Unassigned | 91_0   | Clustered           | 22 VC_91_0   | 22  | 0.5318 | 1          | 0.5318 | 0 | 0 | 0 | 1      | Ref |
| LR215718 | Unassigned | Unassigned | Unassigned | 149_15 | Clustered           | 16 VC_149_15 | 16  | 0.0788 | 1          | 0.0788 | 0 | 0 | 0 | 0.8083 | Ref |
| LR215719 | Unassigned | Unassigned | Unassigned | 149_13 | Clustered           | 3 VC_149_13  | 3   | 0.0087 | 0.95178903 | 0.0083 | 0 | 0 | 0 | 1      | Ref |
| LR215720 | Unassigned | Unassigned | Unassigned | 149_2  | Clustered/Singleton | 1 VC_149_2   | 1   | 0      | 1          | 0      | 0 | 0 | 0 | 1      | Ref |
| LR215721 | Unassigned | Unassigned | Unassigned | 149_29 | Clustered           | 3 VC_149_29  | 3   | 0.012  | 0.99448577 | 0.012  | 0 | 0 | 0 | 1      | Ref |
| LR215722 | Unassigned | Unassigned | Unassigned | 283_97 | Clustered/Singleton | 1 VC_283_97  | 1   | 0      | 1          | 0      | 0 | 0 | 0 | 1      | Ref |
| LR215723 | Unassigned | Unassigned | Unassigned | 283_71 | Clustered/Singleton | 1 VC_283_71  | 1   | 0      | 1          | 0      | 0 | 0 | 0 | 1      | Ref |



|          |            |            |            |         |                     |              |    |        |            |        |   |   |   |            |
|----------|------------|------------|------------|---------|---------------------|--------------|----|--------|------------|--------|---|---|---|------------|
| LR215724 | Unassigned | Unassigned | Unassigned | 283_113 | Clustered/Singleton | 1 VC_283_113 | 1  | 0      | 1          | 0      | 0 | 0 | 0 | 1 Ref      |
| LR535901 | Unassigned | Unassigned | Unassigned | 1208_0  | Clustered           | 11 VC_1208_0 | 11 | 1      | 0          | 0      | 0 | 0 | 0 | 1 Ref      |
| LR535902 | Unassigned | Unassigned | Unassigned | 959_5   | Clustered           | 19 VC_959_5  | 19 | 0.2626 | 1          | 0.2626 | 0 | 0 | 0 | 1 Ref      |
| LR535903 | Unassigned | Unassigned | Unassigned | 1208_0  | Clustered           | 11 VC_1208_0 | 11 | 1      | 0          | 0      | 0 | 0 | 0 | 1 Ref      |
| LR535904 | Unassigned | Unassigned | Unassigned | 1208_0  | Clustered           | 11 VC_1208_0 | 11 | 1      | 0          | 0      | 0 | 0 | 0 | 1 Ref      |
| LR535905 | Unassigned | Unassigned | Unassigned | 1208_0  | Clustered           | 11 VC_1208_0 | 11 | 1      | 0          | 0      | 0 | 0 | 0 | 1 Ref      |
| LR535906 | Unassigned | Unassigned | Unassigned | 1208_0  | Clustered           | 11 VC_1208_0 | 11 | 1      | 0          | 0      | 0 | 0 | 0 | 1 Ref      |
| LR535907 | Unassigned | Unassigned | Unassigned | 1208_0  | Clustered           | 11 VC_1208_0 | 11 | 1      | 0          | 0      | 0 | 0 | 0 | 1 Ref      |
| LR535908 | Unassigned | Unassigned | Unassigned | 1208_0  | Clustered           | 11 VC_1208_0 | 11 | 1      | 0          | 0      | 0 | 0 | 0 | 1 Ref      |
| LR535909 | Unassigned | Unassigned | Unassigned | 959_5   | Clustered           | 19 VC_959_5  | 19 | 0.2626 | 1          | 0.2626 | 0 | 0 | 0 | 1 Ref      |
| LR535910 | Unassigned | Unassigned | Unassigned | 959_5   | Clustered           | 19 VC_959_5  | 19 | 0.2626 | 1          | 0.2626 | 0 | 0 | 0 | 1 Ref      |
| LR535911 | Unassigned | Unassigned | Unassigned | 1208_0  | Clustered           | 11 VC_1208_0 | 11 | 1      | 0          | 0      | 0 | 0 | 0 | 1 Ref      |
| LR535912 | Unassigned | Unassigned | Unassigned | 1208_0  | Clustered           | 11 VC_1208_0 | 11 | 1      | 0          | 0      | 0 | 0 | 0 | 1 Ref      |
| LR535913 | Unassigned | Unassigned | Unassigned | 1208_0  | Clustered           | 11 VC_1208_0 | 11 | 1      | 0          | 0      | 0 | 0 | 0 | 1 Ref      |
| LR535914 | Unassigned | Unassigned | Unassigned | 959_5   | Clustered           | 19 VC_959_5  | 19 | 0.2626 | 1          | 0.2626 | 0 | 0 | 0 | 1 Ref      |
| LR535915 | Unassigned | Unassigned | Unassigned | 959_5   | Clustered           | 19 VC_959_5  | 19 | 0.2626 | 1          | 0.2626 | 0 | 0 | 0 | 1 Ref      |
| LR535916 | Unassigned | Unassigned | Unassigned | 959_5   | Clustered           | 19 VC_959_5  | 19 | 0.2626 | 1          | 0.2626 | 0 | 0 | 0 | 1 Ref      |
| LR535917 | Unassigned | Unassigned | Unassigned | 1208_0  | Clustered           | 11 VC_1208_0 | 11 | 1      | 0          | 0      | 0 | 0 | 0 | 1 Ref      |
| LR535918 | Unassigned | Unassigned | Unassigned | 959_5   | Clustered           | 19 VC_959_5  | 19 | 0.2626 | 1          | 0.2626 | 0 | 0 | 0 | 1 Ref      |
| LR535919 | Unassigned | Unassigned | Unassigned | 959_5   | Clustered           | 19 VC_959_5  | 19 | 0.2626 | 1          | 0.2626 | 0 | 0 | 0 | 1 Ref      |
| LR535920 | Unassigned | Unassigned | Unassigned | 959_5   | Clustered           | 19 VC_959_5  | 19 | 0.2626 | 1          | 0.2626 | 0 | 0 | 0 | 1 Ref      |
| LR535921 | Unassigned | Unassigned | Unassigned | 959_5   | Clustered           | 19 VC_959_5  | 19 | 0.2626 | 1          | 0.2626 | 0 | 0 | 0 | 1 Ref      |
| LR588166 | Unassigned | Unassigned | Unassigned | 165_0   | Clustered           | 4 VC_165_0   | 4  | 0.2247 | 0.99998328 | 0.2247 | 0 | 0 | 0 | 1 Ref      |
| LR595850 | Unassigned | Unassigned | Unassigned | 43_0    | Clustered           | 38 VC_43_0   | 38 | 0.5885 | 1          | 0.5885 | 0 | 0 | 0 | 0.9659 Ref |
| LR595859 | Unassigned | Unassigned | Unassigned | 43_0    | Clustered           | 38 VC_43_0   | 38 | 0.5885 | 1          | 0.5885 | 0 | 0 | 0 | 0.9659 Ref |
| LR595860 | Unassigned | Unassigned | Unassigned | 43_0    | Clustered           | 38 VC_43_0   | 38 | 0.5885 | 1          | 0.5885 | 0 | 0 | 0 | 0.9659 Ref |
| LR595861 | Unassigned | Unassigned | Unassigned | 43_0    | Clustered           | 38 VC_43_0   | 38 | 0.5885 | 1          | 0.5885 | 0 | 0 | 0 | 0.9659 Ref |
| LR595863 | Unassigned | Unassigned | Unassigned | 43_0    | Clustered           | 38 VC_43_0   | 38 | 0.5885 | 1          | 0.5885 | 0 | 0 | 0 | 0.9659 Ref |
| LR595864 | Unassigned | Unassigned | Unassigned | 43_0    | Clustered           | 38 VC_43_0   | 38 | 0.5885 | 1          | 0.5885 | 0 | 0 | 0 | 0.9659 Ref |
| LR595865 | Unassigned | Unassigned | Unassigned | 43_0    | Clustered           | 38 VC_43_0   | 38 | 0.5885 | 1          | 0.5885 | 0 | 0 | 0 | 0.9659 Ref |
| LR595866 | Unassigned | Unassigned | Unassigned | 43_0    | Clustered           | 38 VC_43_0   | 38 | 0.5885 | 1          | 0.5885 | 0 | 0 | 0 | 0.9659 Ref |
| LR595867 | Unassigned | Unassigned | Unassigned | 50_0    | Clustered           | 9 VC_50_0    | 9  | 0.5531 | 1          | 0.5531 | 0 | 0 | 0 | 1 Ref      |
| LR595868 | Unassigned | Unassigned | Unassigned | 51_0    | Clustered           | 10 VC_51_0   | 10 | 0.1741 | 1          | 0.1741 | 0 | 0 | 0 | 1 Ref      |
| LR595869 | Unassigned | Unassigned | Unassigned | 228_0   | Clustered           | 60 VC_228_0  | 60 | 0.942  | 1          | 0.942  | 0 | 0 | 0 | 1 Ref      |
| LR595870 | Unassigned | Unassigned | Unassigned | 228_0   | Clustered           | 60 VC_228_0  | 60 | 0.942  | 1          | 0.942  | 0 | 0 | 0 | 1 Ref      |
| LR595873 | Unassigned | Unassigned | Unassigned | 228_0   | Clustered           | 60 VC_228_0  | 60 | 0.942  | 1          | 0.942  | 0 | 0 | 0 | 1 Ref      |
| LR595883 | Unassigned | Unassigned | Unassigned | 228_0   | Clustered           | 60 VC_228_0  | 60 | 0.942  | 1          | 0.942  | 0 | 0 | 0 | 1 Ref      |
| LR595885 | Unassigned | Unassigned | Unassigned | 228_0   | Clustered           | 60 VC_228_0  | 60 | 0.942  | 1          | 0.942  | 0 | 0 | 0 | 1 Ref      |
| LR595887 | Unassigned | Unassigned | Unassigned | 228_0   | Clustered           | 60 VC_228_0  | 60 | 0.942  | 1          | 0.942  | 0 | 0 | 0 | 1 Ref      |
| LR595891 | Unassigned | Unassigned | Unassigned | 229_0   | Clustered           | 32 VC_229_0  | 32 | 0.9119 | 1          | 0.9119 | 0 | 0 | 0 | 1 Ref      |
| LR596614 | Unassigned | Unassigned | Unassigned | 942_0   | Clustered           | 36 VC_942_0  | 36 | 0.7848 | 1          | 0.7848 | 0 | 0 | 0 | 1 Ref      |
| LR596615 | Unassigned | Unassigned | Unassigned | 164_8   | Clustered           | 3 VC_164_8   | 3  | 0.0299 | 0.84944649 | 0.0254 | 0 | 0 | 0 | 1 Ref      |
| LR596902 | Unassigned | Unassigned | Unassigned | 418_0   | Clustered           | 6 VC_418_0   | 6  | 0.4575 | 0.9999995  | 0.4575 | 0 | 0 | 0 | 0.8 Ref    |
| LR596903 | Unassigned | Unassigned | Unassigned | 717_0   | Clustered           | 7 VC_717_0   | 7  | 0.5813 | 1          | 0.5813 | 0 | 0 | 0 | 0.9048 Ref |
| LR597635 | Unassigned | Unassigned | Unassigned | 43_0    | Clustered           | 38 VC_43_0   | 38 | 0.5885 | 1          | 0.5885 | 0 | 0 | 0 | 0.9659 Ref |
| LR597636 | Unassigned | Unassigned | Unassigned | 43_0    | Clustered           | 38 VC_43_0   | 38 | 0.5885 | 1          | 0.5885 | 0 | 0 | 0 | 0.9659 Ref |
| LR597637 | Unassigned | Unassigned | Unassigned | 5_0     | Clustered           | 30 VC_5_0    | 30 | 0.9647 | 1          | 0.9647 | 0 | 0 | 0 | 1 Ref      |
| LR597638 | Unassigned | Unassigned | Unassigned | 5_0     | Clustered           | 30 VC_5_0    | 30 | 0.9647 | 1          | 0.9647 | 0 | 0 | 0 | 1 Ref      |
| LR597639 | Unassigned | Unassigned | Unassigned | 43_0    | Clustered           | 38 VC_43_0   | 38 | 0.5885 | 1          | 0.5885 | 0 | 0 | 0 | 0.9659 Ref |
| LR597640 | Unassigned | Unassigned | Unassigned | 5_0     | Clustered           | 30 VC_5_0    | 30 | 0.9647 | 1          | 0.9647 | 0 | 0 | 0 | 1 Ref      |
| LR597641 | Unassigned | Unassigned | Unassigned | 51_0    | Clustered           | 10 VC_51_0   | 10 | 0.1741 | 1          | 0.1741 | 0 | 0 | 0 | 1 Ref      |
| LR597642 | Unassigned | Unassigned | Unassigned | 245_0   | Clustered           | 10 VC_245_0  | 10 | 0.1805 | 1          | 0.1805 | 0 | 0 | 0 | 0.9778 Ref |
| LR597643 | Unassigned | Unassigned | Unassigned | 43_0    | Clustered           | 38 VC_43_0   | 38 | 0.5885 | 1          | 0.5885 | 0 | 0 | 0 | 0.9659 Ref |
| LR597644 | Unassigned | Unassigned | Unassigned | 43_0    | Clustered           | 38 VC_43_0   | 38 | 0.5885 | 1          | 0.5885 | 0 | 0 | 0 | 0.9659 Ref |
| LR597646 | Unassigned | Unassigned | Unassigned | 835_0   | Clustered           | 67 VC_835_0  | 67 | 0.9624 | 1          | 0.9624 | 0 | 0 | 0 | 1 Ref      |
| LR597647 | Unassigned | Unassigned | Unassigned | 772_9   | Clustered           | 7 VC_772_9   | 7  | 0.0369 | 0.87705503 | 0.0324 | 0 | 0 | 0 | 1 Ref      |
| LR597648 | Unassigned | Unassigned | Unassigned | 43_0    | Clustered           | 38 VC_43_0   | 38 | 0.5885 | 1          | 0.5885 | 0 | 0 | 0 | 0.9659 Ref |
| LR597649 | Unassigned | Unassigned | Unassigned | 5_0     | Clustered           | 30 VC_5_0    | 30 | 0.9647 | 1          | 0.9647 | 0 | 0 | 0 | 1 Ref      |
| LR597650 | Unassigned | Unassigned | Unassigned | 43_0    | Clustered           | 38 VC_43_0   | 38 | 0.5885 | 1          | 0.5885 | 0 | 0 | 0 | 0.9659 Ref |
| LR597651 | Unassigned | Unassigned | Unassigned | 43_0    | Clustered           | 38 VC_43_0   | 38 | 0.5885 | 1          | 0.5885 | 0 | 0 | 0 | 0.9659 Ref |
| LR597652 | Unassigned | Unassigned | Unassigned | 43_0    | Clustered           | 38 VC_43_0   | 38 | 0.5885 | 1          | 0.5885 | 0 | 0 | 0 | 0.9659 Ref |
| LR597653 | Unassigned | Unassigned | Unassigned | 43_0    | Clustered           | 38 VC_43_0   | 38 | 0.5885 | 1          | 0.5885 | 0 | 0 | 0 | 0.9659 Ref |
| LR597654 | Unassigned | Unassigned | Unassigned | 847_1   | Clustered           | 26 VC_847_1  | 26 | 0.6323 | 1          | 0.6323 | 0 | 0 | 0 | 0.9815 Ref |
| LR597655 | Unassigned | Unassigned | Unassigned | 190_14  | Clustered           | 3 VC_190_14  | 3  | 0.0144 | 0.99696852 | 0.0143 | 0 | 0 | 0 | 0.6667 Ref |
| LR597656 | Unassigned | Unassigned | Unassigned | 584_0   | Clustered           | 28 VC_584_0  | 28 | 0.7704 | 1          | 0.7704 | 0 | 0 | 0 | 1 Ref      |
| LR597657 | Unassigned | Unassigned | Unassigned | 283_137 | Clustered/Singleton | 1 VC_283_137 | 1  | 0      | 1          | 0      | 0 | 0 | 0 | 1 Ref      |
| LR597658 | Unassigned | Unassigned | Unassigned | 329_6   | Clustered           | 3 VC_329_6   | 3  | 0.0107 | 0.99833469 | 0.0107 | 0 | 0 | 0 | 1 Ref      |
| LR597659 | Unassigned | Unassigned | Unassigned | 190_24  | Clustered           | 5 VC_190_24  | 5  | 0.0293 | 0.9999996  | 0.0293 | 0 | 0 | 0 | 0.7 Ref    |
| LR597660 | Unassigned | Unassigned | Unassigned | 283_101 | Clustered/Singleton | 1 VC_283_101 | 1  | 0      | 1          | 0      | 0 | 0 | 0 | 1 Ref      |
| LR597663 | Unassigned | Unassigned | Unassigned | 329_9   | Clustered/Singleton | 1 VC_329_9   | 1  | 0      | 1          | 0      | 0 | 0 | 0 | 1 Ref      |
| LR694165 | Unassigned | Unassigned | Unassigned | 772_9   | Clustered           | 7 VC_772_9   | 7  | 0.0369 | 0.87705503 | 0.0324 | 0 | 0 | 0 | 1 Ref      |
| LR694610 | Unassigned | Unassigned | Unassigned | 772_7   | Clustered           | 2 VC_772_7   | 2  | 0.006  | 0.58868714 | 0.0035 | 0 | 0 | 0 | 1 Ref      |
| LR694611 | Unassigned | Unassigned | Unassigned | 772_7   | Clustered           | 2 VC_772_7   | 2  | 0.006  | 0.58868714 | 0.0035 | 0 | 0 | 0 | 1 Ref      |
| LR699048 | Unassigned | Unassigned | Unassigned | 329_7   | Clustered           | 18 VC_329_7  | 18 | 0.0938 | 1          | 0.0938 | 0 | 0 | 0 | 0.7778 Ref |
| LR699804 | Unassigned | Unassigned | Unassigned | 772_19  | Clustered           | 16 VC_772_19 | 16 | 0.0975 | 0.9970466  | 0.0972 | 0 | 0 | 0 | 0.8083 Ref |
| LR743523 | Unassigned | Unassigned | Unassigned | 116_0   | Clustered           | 13 VC_116_0  | 13 | 1      | 1          | 1      | 0 | 0 | 0 | 1 Ref      |
| LR743524 | Unassigned | Unassigned | Unassigned | 172_0   | Clustered           | 5 VC_172_0   | 5  | 0.3579 | 0.99999997 | 0.3579 | 0 | 0 | 0 | 1 Ref      |
| LR743528 | Unassigned | Unassigned | Unassigned | 116_0   | Clustered           | 13 VC_116_0  | 13 | 1      | 1          | 1      | 0 | 0 | 0 | 1 Ref      |
| LR743529 | Unassigned | Unassigned | Unassigned | 116_0   | Clustered           | 13 VC_116_0  | 13 | 1      | 1          | 1      | 0 | 0 | 0 | 1 Ref      |
| LR743530 | Unassigned | Unassigned | Unassigned | 749_0   | Clustered           | 40 VC_749_0  | 40 | 0.7517 | 1          | 0.7517 | 0 | 0 | 0 | 1 Ref      |
| LR743531 | Unassigned | Unassigned | Unassigned | 116_0   | Clustered           | 13 VC_116_0  | 13 | 1      | 1          | 1      | 0 | 0 | 0 | 1 Ref      |



|          |            |            |            |         |                     |              |     |        |            |        |   |   |   |            |
|----------|------------|------------|------------|---------|---------------------|--------------|-----|--------|------------|--------|---|---|---|------------|
| LR743532 | Unassigned | Unassigned | Unassigned | 169_0   | Clustered           | 20 VC_169_0  | 20  | 0.7529 | 1          | 0.7529 | 0 | 0 | 0 | 1 Ref      |
| LR745206 | Unassigned | Unassigned | Unassigned | 533_1   | Clustered/Singleton | 1 VC_533_1   | 1   | 0      | 1          | 0      | 0 | 0 | 0 | 1 Ref      |
| LR745706 | Unassigned | Unassigned | Unassigned | 392_0   | Clustered           | 126 VC_392_0 | 126 | 0.9621 | 1          | 0.9621 | 0 | 0 | 0 | 1 Ref      |
| LR745707 | Unassigned | Unassigned | Unassigned | 392_0   | Clustered           | 126 VC_392_0 | 126 | 0.9621 | 1          | 0.9621 | 0 | 0 | 0 | 1 Ref      |
| LR745708 | Unassigned | Unassigned | Unassigned | 392_0   | Clustered           | 126 VC_392_0 | 126 | 0.9621 | 1          | 0.9621 | 0 | 0 | 0 | 1 Ref      |
| LR745709 | Unassigned | Unassigned | Unassigned | 392_0   | Clustered           | 126 VC_392_0 | 126 | 0.9621 | 1          | 0.9621 | 0 | 0 | 0 | 1 Ref      |
| LR745710 | Unassigned | Unassigned | Unassigned | 392_0   | Clustered           | 126 VC_392_0 | 126 | 0.9621 | 1          | 0.9621 | 0 | 0 | 0 | 1 Ref      |
| LR746137 | Unassigned | Unassigned | Unassigned | 847_1   | Clustered           | 26 VC_847_1  | 26  | 0.6323 | 1          | 0.6323 | 0 | 0 | 0 | 0.9815 Ref |
| LR746310 | Unassigned | Unassigned | Unassigned | 668_0   | Clustered           | 25 VC_668_0  | 25  | 0.5539 | 1          | 0.5539 | 0 | 0 | 0 | 0.96 Ref   |
| LR746311 | Unassigned | Unassigned | Unassigned | 283_141 | Clustered/Singleton | 1 VC_283_141 | 1   | 0      | 1          | 0      | 0 | 0 | 0 | 1 Ref      |
| LR756501 | Unassigned | Unassigned | Unassigned | 533_0   | Clustered           | 2 VC_533_0   | 2   | 0.2712 | 0.93085693 | 0.2525 | 0 | 0 | 0 | 1 Ref      |
| LR756502 | Unassigned | Unassigned | Unassigned | 533_2   | Clustered/Singleton | 1 VC_533_2   | 1   | 0      | 1          | 0      | 0 | 0 | 0 | 1 Ref      |
| LR756503 | Unassigned | Unassigned | Unassigned | 533_0   | Clustered           | 2 VC_533_0   | 2   | 0.2712 | 0.93085693 | 0.2525 | 0 | 0 | 0 | 1 Ref      |
| LR756504 | Unassigned | Unassigned | Unassigned | 533_3   | Clustered/Singleton | 1 VC_533_3   | 1   | 0      | 1          | 0      | 0 | 0 | 0 | 1 Ref      |
| LR757892 | Unassigned | Unassigned | Unassigned | 938_0   | Clustered           | 99 VC_938_0  | 99  | 0.9119 | 1          | 0.9119 | 0 | 0 | 0 | 0.9928 Ref |
| LR778216 | Unassigned | Unassigned | Unassigned | 74_0    | Clustered           | 15 VC_74_0   | 15  | 0.5204 | 1          | 0.5204 | 0 | 0 | 0 | 1 Ref      |
| LR794124 | Unassigned | Unassigned | Unassigned | 837_0   | Clustered           | 29 VC_837_0  | 29  | 0.9955 | 1          | 0.9955 | 0 | 0 | 0 | 1 Ref      |
| LR794146 | Unassigned | Unassigned | Unassigned | 29_0    | Clustered           | 10 VC_29_0   | 10  | 0.5208 | 1          | 0.5208 | 0 | 0 | 0 | 1 Ref      |
| LR794147 | Unassigned | Unassigned | Unassigned | 29_0    | Clustered           | 10 VC_29_0   | 10  | 0.5208 | 1          | 0.5208 | 0 | 0 | 0 | 1 Ref      |
| LR794148 | Unassigned | Unassigned | Unassigned | 29_0    | Clustered           | 10 VC_29_0   | 10  | 0.5208 | 1          | 0.5208 | 0 | 0 | 0 | 1 Ref      |
| LR794149 | Unassigned | Unassigned | Unassigned | 29_0    | Clustered           | 10 VC_29_0   | 10  | 0.5208 | 1          | 0.5208 | 0 | 0 | 0 | 1 Ref      |
| LR794150 | Unassigned | Unassigned | Unassigned | 29_0    | Clustered           | 10 VC_29_0   | 10  | 0.5208 | 1          | 0.5208 | 0 | 0 | 0 | 1 Ref      |
| LR794151 | Unassigned | Unassigned | Unassigned | 29_0    | Clustered           | 10 VC_29_0   | 10  | 0.5208 | 1          | 0.5208 | 0 | 0 | 0 | 1 Ref      |
| LR794152 | Unassigned | Unassigned | Unassigned | 29_0    | Clustered           | 10 VC_29_0   | 10  | 0.5208 | 1          | 0.5208 | 0 | 0 | 0 | 1 Ref      |
| LR797314 | Unassigned | Unassigned | Unassigned | 185_0   | Clustered           | 3 VC_185_0   | 3   | 0.4487 | 0.97148006 | 0.4359 | 0 | 0 | 0 | 1 Ref      |
| LR797923 | Unassigned | Unassigned | Unassigned | 29_0    | Clustered           | 10 VC_29_0   | 10  | 0.5208 | 1          | 0.5208 | 0 | 0 | 0 | 1 Ref      |
| LR800396 | Unassigned | Unassigned | Unassigned | 133_13  | Clustered           | 2 VC_133_13  | 2   | 0.0051 | 0.86794768 | 0.0044 | 0 | 0 | 0 | 1 Ref      |
| LR811967 | Unassigned | Unassigned | Unassigned | 133_28  | Clustered           | 3 VC_133_28  | 3   | 0.0105 | 0.97661637 | 0.0103 | 0 | 0 | 0 | 0.6667 Ref |
| LR811968 | Unassigned | Unassigned | Unassigned | 133_4   | Clustered/Singleton | 1 VC_133_4   | 1   | 0      | 1          | 0      | 0 | 0 | 0 | 1 Ref      |
| LR811969 | Unassigned | Unassigned | Unassigned | 133_28  | Clustered           | 3 VC_133_28  | 3   | 0.0105 | 0.97661637 | 0.0103 | 0 | 0 | 0 | 0.6667 Ref |
| LR813619 | Unassigned | Unassigned | Unassigned | 793_0   | Clustered           | 12 VC_793_0  | 12  | 0.8531 | 1          | 0.8531 | 0 | 0 | 0 | 1 Ref      |
| LR865361 | Unassigned | Unassigned | Unassigned | 848_0   | Clustered           | 28 VC_848_0  | 28  | 0.7927 | 1          | 0.7927 | 0 | 0 | 0 | 1 Ref      |
| LR877331 | Unassigned | Unassigned | Unassigned | 491_0   | Clustered           | 36 VC_491_0  | 36  | 0.5336 | 1          | 0.5336 | 0 | 0 | 0 | 0.9714 Ref |
| LR877332 | Unassigned | Unassigned | Unassigned | 283_67  | Clustered           | 2 VC_283_67  | 2   | 0.0027 | 0.90726003 | 0.0025 | 0 | 0 | 0 | 1 Ref      |
| LR880803 | Unassigned | Unassigned | Unassigned | 329_3   | Clustered           | 24 VC_329_3  | 24  | 0.1206 | 1          | 0.1206 | 0 | 0 | 0 | 0.7283 Ref |
| LR881104 | Unassigned | Unassigned | Unassigned | 347_0   | Clustered           | 3 VC_347_0   | 3   | 0.1545 | 0.9984446  | 0.1543 | 0 | 0 | 0 | 1 Ref      |
| LR900702 | Unassigned | Unassigned | Unassigned | 835_0   | Clustered           | 67 VC_835_0  | 67  | 0.9624 | 1          | 0.9624 | 0 | 0 | 0 | 1 Ref      |
| LR900704 | Unassigned | Unassigned | Unassigned | 283_38  | Clustered/Singleton | 1 VC_283_38  | 1   | 0      | 1          | 0      | 0 | 0 | 0 | 1 Ref      |
| LR900835 | Unassigned | Unassigned | Unassigned | 92_0    | Clustered           | 22 VC_92_0   | 22  | 0.5639 | 1          | 0.5639 | 0 | 0 | 0 | 1 Ref      |
| LR909870 | Unassigned | Unassigned | Unassigned | 835_0   | Clustered           | 67 VC_835_0  | 67  | 0.9624 | 1          | 0.9624 | 0 | 0 | 0 | 1 Ref      |
| LR909871 | Unassigned | Unassigned | Unassigned | 779_0   | Clustered           | 37 VC_779_0  | 37  | 0.5682 | 1          | 0.5682 | 0 | 0 | 0 | 1 Ref      |
| LT546029 | Unassigned | Unassigned | Unassigned | 691_1   | Clustered           | 5 VC_691_1   | 5   | 0.4358 | 0.99999993 | 0.4358 | 0 | 0 | 0 | 1 Ref      |
| LT594300 | Unassigned | Unassigned | Unassigned | 451_0   | Clustered           | 80 VC_451_0  | 80  | 0.9991 | 1          | 0.9991 | 0 | 0 | 0 | 1 Ref      |
| LT598654 | Unassigned | Unassigned | Unassigned | 67_5    | Clustered/Singleton | 1 VC_67_5    | 1   | 0      | 1          | 0      | 0 | 0 | 0 | 1 Ref      |
| LT600745 | Unassigned | Unassigned | Unassigned | 822_0   | Clustered           | 2 VC_822_0   | 2   | 0.038  | 0.89489263 | 0.034  | 0 | 0 | 0 | 1 Ref      |
| LT603033 | Unassigned | Unassigned | Unassigned | 164_11  | Clustered           | 10 VC_164_11 | 10  | 0.1507 | 1          | 0.1507 | 0 | 0 | 0 | 0.9111 Ref |
| LT603684 | Unassigned | Unassigned | Unassigned | 630_0   | Clustered           | 20 VC_630_0  | 20  | 0.8513 | 1          | 0.8513 | 0 | 0 | 0 | 1 Ref      |
| LT607758 | Unassigned | Unassigned | Unassigned | 668_0   | Clustered           | 25 VC_668_0  | 25  | 0.5539 | 1          | 0.5539 | 0 | 0 | 0 | 0.96 Ref   |
| LT608331 | Unassigned | Unassigned | Unassigned | 179_0   | Clustered           | 53 VC_179_0  | 53  | 0.9137 | 1          | 0.9137 | 0 | 0 | 0 | 1 Ref      |
| LT615366 | Unassigned | Unassigned | Unassigned | 691_1   | Clustered           | 5 VC_691_1   | 5   | 0.4358 | 0.99999993 | 0.4358 | 0 | 0 | 0 | 1 Ref      |
| LT630001 | Unassigned | Unassigned | Unassigned | 967_0   | Clustered           | 16 VC_967_0  | 16  | 0.8971 | 1          | 0.8971 | 0 | 0 | 0 | 1 Ref      |
| LT714109 | Unassigned | Unassigned | Unassigned | 28_1    | Clustered           | 53 VC_28_1   | 53  | 0.7164 | 1          | 0.7164 | 0 | 0 | 0 | 0.9325 Ref |
| LT841304 | Unassigned | Unassigned | Unassigned | 942_0   | Clustered           | 36 VC_942_0  | 36  | 0.7848 | 1          | 0.7848 | 0 | 0 | 0 | 1 Ref      |
| LT898437 | Unassigned | Unassigned | Unassigned | 315_0   | Clustered           | 12 VC_315_0  | 12  | 0.8947 | 1          | 0.8947 | 0 | 0 | 0 | 1 Ref      |
| LT907986 | Unassigned | Unassigned | Unassigned | 795_0   | Clustered           | 19 VC_795_0  | 19  | 0.6848 | 1          | 0.6848 | 0 | 0 | 0 | 1 Ref      |
| LT960551 | Unassigned | Unassigned | Unassigned | 164_8   | Clustered           | 3 VC_164_8   | 3   | 0.0299 | 0.84944649 | 0.0254 | 0 | 0 | 0 | 1 Ref      |
| LT960552 | Unassigned | Unassigned | Unassigned | 164_8   | Clustered           | 3 VC_164_8   | 3   | 0.0299 | 0.84944649 | 0.0254 | 0 | 0 | 0 | 1 Ref      |
| LT960606 | Unassigned | Unassigned | Unassigned | 386_0   | Clustered           | 49 VC_386_0  | 49  | 0.7941 | 1          | 0.7941 | 0 | 0 | 0 | 1 Ref      |
| LT960608 | Unassigned | Unassigned | Unassigned | 85_3    | Clustered           | 19 VC_85_3   | 19  | 0.3671 | 1          | 0.3671 | 0 | 0 | 0 | 0.807 Ref  |
| LT960609 | Unassigned | Unassigned | Unassigned | 835_0   | Clustered           | 67 VC_835_0  | 67  | 0.9624 | 1          | 0.9624 | 0 | 0 | 0 | 1 Ref      |
| LT961732 | Unassigned | Unassigned | Unassigned | 942_0   | Clustered           | 36 VC_942_0  | 36  | 0.7848 | 1          | 0.7848 | 0 | 0 | 0 | 1 Ref      |
| LT961836 | Unassigned | Unassigned | Unassigned | 386_0   | Clustered           | 49 VC_386_0  | 49  | 0.7941 | 1          | 0.7941 | 0 | 0 | 0 | 1 Ref      |
| LT961837 | Unassigned | Unassigned | Unassigned | 386_0   | Clustered           | 49 VC_386_0  | 49  | 0.7941 | 1          | 0.7941 | 0 | 0 | 0 | 1 Ref      |
| LT961838 | Unassigned | Unassigned | Unassigned | 386_0   | Clustered           | 49 VC_386_0  | 49  | 0.7941 | 1          | 0.7941 | 0 | 0 | 0 | 1 Ref      |
| LT961840 | Unassigned | Unassigned | Unassigned | 386_0   | Clustered           | 49 VC_386_0  | 49  | 0.7941 | 1          | 0.7941 | 0 | 0 | 0 | 1 Ref      |
| LT961841 | Unassigned | Unassigned | Unassigned | 386_0   | Clustered           | 49 VC_386_0  | 49  | 0.7941 | 1          | 0.7941 | 0 | 0 | 0 | 1 Ref      |
| LT961842 | Unassigned | Unassigned | Unassigned | 386_0   | Clustered           | 49 VC_386_0  | 49  | 0.7941 | 1          | 0.7941 | 0 | 0 | 0 | 1 Ref      |
| LT961843 | Unassigned | Unassigned | Unassigned | 386_0   | Clustered           | 49 VC_386_0  | 49  | 0.7941 | 1          | 0.7941 | 0 | 0 | 0 | 1 Ref      |
| LT961844 | Unassigned | Unassigned | Unassigned | 386_0   | Clustered           | 49 VC_386_0  | 49  | 0.7941 | 1          | 0.7941 | 0 | 0 | 0 | 1 Ref      |
| LT961845 | Unassigned | Unassigned | Unassigned | 386_0   | Clustered           | 49 VC_386_0  | 49  | 0.7941 | 1          | 0.7941 | 0 | 0 | 0 | 1 Ref      |
| LT961846 | Unassigned | Unassigned | Unassigned | 386_0   | Clustered           | 49 VC_386_0  | 49  | 0.7941 | 1          | 0.7941 | 0 | 0 | 0 | 1 Ref      |
| LT962379 | Unassigned | Unassigned | Unassigned | 386_0   | Clustered           | 49 VC_386_0  | 49  | 0.7941 | 1          | 0.7941 | 0 | 0 | 0 | 1 Ref      |
| LT962380 | Unassigned | Unassigned | Unassigned | 386_0   | Clustered           | 49 VC_386_0  | 49  | 0.7941 | 1          | 0.7941 | 0 | 0 | 0 | 1 Ref      |
| LT962475 | Unassigned | Unassigned | Unassigned | 386_0   | Clustered           | 49 VC_386_0  | 49  | 0.7941 | 1          | 0.7941 | 0 | 0 | 0 | 1 Ref      |
| LT962906 | Unassigned | Unassigned | Unassigned | 386_0   | Clustered           | 49 VC_386_0  | 49  | 0.7941 | 1          | 0.7941 | 0 | 0 | 0 | 1 Ref      |
| LT962907 | Unassigned | Unassigned | Unassigned | 386_0   | Clustered           | 49 VC_386_0  | 49  | 0.7941 | 1          | 0.7941 | 0 | 0 | 0 | 1 Ref      |
| LT985568 | Unassigned | Unassigned | Unassigned | 260_0   | Clustered           | 13 VC_260_0  | 13  | 0.3705 | 1          | 0.3705 | 0 | 0 | 0 | 1 Ref      |
| LT985569 | Unassigned | Unassigned | Unassigned | 263_0   | Clustered           | 7 VC_263_0   | 7   | 0.2364 | 1          | 0.2364 | 0 | 0 | 0 | 1 Ref      |
| LT985571 | Unassigned | Unassigned | Unassigned | 260_0   | Clustered           | 13 VC_260_0  | 13  | 0.3705 | 1          | 0.3705 | 0 | 0 | 0 | 1 Ref      |
| LT985572 | Unassigned | Unassigned | Unassigned | 339_0   | Clustered           | 9 VC_339_0   | 9   | 0.9405 | 0.99999771 | 0.9405 | 0 | 0 | 0 | 1 Ref      |
| LT985574 | Unassigned | Unassigned | Unassigned | 263_0   | Clustered           | 7 VC_263_0   | 7   | 0.2364 | 1          | 0.2364 | 0 | 0 | 0 | 1 Ref      |



|          |            |            |            |         |                     |              |     |        |            |        |   |   |   |            |
|----------|------------|------------|------------|---------|---------------------|--------------|-----|--------|------------|--------|---|---|---|------------|
| LT985575 | Unassigned | Unassigned | Unassigned | 265_0   | Clustered           | 12 VC_265_0  | 12  | 0.4401 | 1          | 0.4401 | 0 | 0 | 0 | 1 Ref      |
| LT985576 | Unassigned | Unassigned | Unassigned | 265_0   | Clustered           | 12 VC_265_0  | 12  | 0.4401 | 1          | 0.4401 | 0 | 0 | 0 | 1 Ref      |
| LT985578 | Unassigned | Unassigned | Unassigned | 263_0   | Clustered           | 7 VC_263_0   | 7   | 0.2364 | 1          | 0.2364 | 0 | 0 | 0 | 1 Ref      |
| LT985581 | Unassigned | Unassigned | Unassigned | 339_0   | Clustered           | 9 VC_339_0   | 9   | 0.9405 | 0.99999771 | 0.9405 | 0 | 0 | 0 | 1 Ref      |
| LT985583 | Unassigned | Unassigned | Unassigned | 263_0   | Clustered           | 7 VC_263_0   | 7   | 0.2364 | 1          | 0.2364 | 0 | 0 | 0 | 1 Ref      |
| LT985584 | Unassigned | Unassigned | Unassigned | 339_0   | Clustered           | 9 VC_339_0   | 9   | 0.9405 | 0.99999771 | 0.9405 | 0 | 0 | 0 | 1 Ref      |
| LT985586 | Unassigned | Unassigned | Unassigned | 339_0   | Clustered           | 9 VC_339_0   | 9   | 0.9405 | 0.99999771 | 0.9405 | 0 | 0 | 0 | 1 Ref      |
| LT985587 | Unassigned | Unassigned | Unassigned | 339_0   | Clustered           | 9 VC_339_0   | 9   | 0.9405 | 0.99999771 | 0.9405 | 0 | 0 | 0 | 1 Ref      |
| LT985589 | Unassigned | Unassigned | Unassigned | 301_0   | Clustered           | 2 VC_301_0   | 2   | 0.1292 | 0.94930205 | 0.1226 | 0 | 0 | 0 | 1 Ref      |
| LT985593 | Unassigned | Unassigned | Unassigned | 339_0   | Clustered           | 9 VC_339_0   | 9   | 0.9405 | 0.99999771 | 0.9405 | 0 | 0 | 0 | 1 Ref      |
| LT986460 | Unassigned | Unassigned | Unassigned | 755_0   | Clustered           | 9 VC_755_0   | 9   | 0.4489 | 1          | 0.4489 | 0 | 0 | 0 | 1 Ref      |
| LT986678 | Unassigned | Unassigned | Unassigned | 1211_0  | Clustered           | 25 VC_1211_0 | 25  | 1      | 1          | 1      | 0 | 0 | 0 | 1 Ref      |
| LT993224 | Unassigned | Unassigned | Unassigned | 260_0   | Clustered           | 13 VC_260_0  | 13  | 0.3705 | 1          | 0.3705 | 0 | 0 | 0 | 1 Ref      |
| LT993227 | Unassigned | Unassigned | Unassigned | 339_0   | Clustered           | 9 VC_339_0   | 9   | 0.9405 | 0.99999771 | 0.9405 | 0 | 0 | 0 | 1 Ref      |
| LT993229 | Unassigned | Unassigned | Unassigned | 263_0   | Clustered           | 7 VC_263_0   | 7   | 0.2364 | 1          | 0.2364 | 0 | 0 | 0 | 1 Ref      |
| LT993247 | Unassigned | Unassigned | Unassigned | 301_0   | Clustered           | 2 VC_301_0   | 2   | 0.1292 | 0.94930205 | 0.1226 | 0 | 0 | 0 | 1 Ref      |
| LT996080 | Unassigned | Unassigned | Unassigned | 339_0   | Clustered           | 9 VC_339_0   | 9   | 0.9405 | 0.99999771 | 0.9405 | 0 | 0 | 0 | 1 Ref      |
| LT996081 | Unassigned | Unassigned | Unassigned | 265_0   | Clustered           | 12 VC_265_0  | 12  | 0.4401 | 1          | 0.4401 | 0 | 0 | 0 | 1 Ref      |
| LT996082 | Unassigned | Unassigned | Unassigned | 263_0   | Clustered           | 7 VC_263_0   | 7   | 0.2364 | 1          | 0.2364 | 0 | 0 | 0 | 1 Ref      |
| LT999987 | Unassigned | Unassigned | Unassigned | 179_0   | Clustered           | 53 VC_179_0  | 53  | 0.9137 | 1          | 0.9137 | 0 | 0 | 0 | 1 Ref      |
| MF001354 | Unassigned | Unassigned | Unassigned | 283_79  | Clustered/Singleton | 1 VC_283_79  | 1   | 0      | 1          | 0      | 0 | 0 | 0 | 1 Ref      |
| MF001355 | Unassigned | Unassigned | Unassigned | 288_3   | Clustered           | 3 VC_288_3   | 3   | 0.0452 | 0.99844025 | 0.0452 | 0 | 0 | 0 | 1 Ref      |
| MF001356 | Unassigned | Unassigned | Unassigned | 637_0   | Clustered           | 115 VC_637_0 | 115 | 0.731  | 1          | 0.731  | 0 | 0 | 0 | 0.8764 Ref |
| MF001358 | Unassigned | Unassigned | Unassigned | 692_0   | Clustered           | 2 VC_692_0   | 2   | 0.4503 | 0.95340726 | 0.4294 | 0 | 0 | 0 | 1 Ref      |
| MF001359 | Unassigned | Unassigned | Unassigned | 283_183 | Clustered/Singleton | 1 VC_283_183 | 1   | 0      | 1          | 0      | 0 | 0 | 0 | 1 Ref      |
| MF001360 | Unassigned | Unassigned | Unassigned | 283_14  | Clustered/Singleton | 1 VC_283_14  | 1   | 0      | 1          | 0      | 0 | 0 | 0 | 1 Ref      |
| MF001361 | Unassigned | Unassigned | Unassigned | 692_0   | Clustered           | 2 VC_692_0   | 2   | 0.4503 | 0.95340726 | 0.4294 | 0 | 0 | 0 | 1 Ref      |
| MF001362 | Unassigned | Unassigned | Unassigned | 133_24  | Clustered/Singleton | 1 VC_133_24  | 1   | 0      | 1          | 0      | 0 | 0 | 0 | 1 Ref      |
| MF001363 | Unassigned | Unassigned | Unassigned | 191_16  | Clustered           | 12 VC_191_16 | 12  | 0.0643 | 1          | 0.0643 | 0 | 0 | 0 | 0.9394 Ref |
| MF001365 | Unassigned | Unassigned | Unassigned | 149_15  | Clustered           | 16 VC_149_15 | 16  | 0.0788 | 1          | 0.0788 | 0 | 0 | 0 | 0.8083 Ref |
| MF001366 | Unassigned | Unassigned | Unassigned | 637_0   | Clustered           | 115 VC_637_0 | 115 | 0.731  | 1          | 0.731  | 0 | 0 | 0 | 0.8764 Ref |
| MF033347 | Unassigned | Unassigned | Unassigned | 699_0   | Clustered           | 71 VC_699_0  | 71  | 0.9352 | 1          | 0.9352 | 0 | 0 | 0 | 1 Ref      |
| MF033348 | Unassigned | Unassigned | Unassigned | 699_0   | Clustered           | 71 VC_699_0  | 71  | 0.9352 | 1          | 0.9352 | 0 | 0 | 0 | 1 Ref      |
| MF033349 | Unassigned | Unassigned | Unassigned | 699_0   | Clustered           | 71 VC_699_0  | 71  | 0.9352 | 1          | 0.9352 | 0 | 0 | 0 | 1 Ref      |
| MF033350 | Unassigned | Unassigned | Unassigned | 699_0   | Clustered           | 71 VC_699_0  | 71  | 0.9352 | 1          | 0.9352 | 0 | 0 | 0 | 1 Ref      |
| MF033351 | Unassigned | Unassigned | Unassigned | 699_0   | Clustered           | 71 VC_699_0  | 71  | 0.9352 | 1          | 0.9352 | 0 | 0 | 0 | 1 Ref      |
| MF034659 | Unassigned | Unassigned | Unassigned | 422_0   | Clustered           | 5 VC_422_0   | 5   | 0.2592 | 0.99999997 | 0.2592 | 0 | 0 | 0 | 1 Ref      |
| MF038790 | Unassigned | Unassigned | Unassigned | 1164_0  | Clustered           | 25 VC_1164_0 | 25  | 0.7312 | 1          | 0.7312 | 0 | 0 | 0 | 1 Ref      |
| MF038791 | Unassigned | Unassigned | Unassigned | 1164_0  | Clustered           | 25 VC_1164_0 | 25  | 0.7312 | 1          | 0.7312 | 0 | 0 | 0 | 1 Ref      |
| MF041990 | Unassigned | Unassigned | Unassigned | 309_0   | Clustered           | 3 VC_309_0   | 3   | 0.1265 | 0.99498896 | 0.1258 | 0 | 0 | 0 | 1 Ref      |
| MF042360 | Unassigned | Unassigned | Unassigned | 344_5   | Clustered/Singleton | 1 VC_344_5   | 1   | 0      | 1          | 0      | 0 | 0 | 0 | 1 Ref      |
| MF044457 | Unassigned | Unassigned | Unassigned | 286_13  | Clustered           | 10 VC_286_13 | 10  | 0.0698 | 0.99999929 | 0.0698 | 0 | 0 | 0 | 0.9556 Ref |
| MF044458 | Unassigned | Unassigned | Unassigned | 792_0   | Clustered           | 35 VC_792_0  | 35  | 0.9828 | 1          | 0.9828 | 0 | 0 | 0 | 1 Ref      |
| MF063068 | Unassigned | Unassigned | Unassigned | 344_2   | Clustered/Singleton | 1 VC_344_2   | 1   | 0      | 1          | 0      | 0 | 0 | 0 | 1 Ref      |
| MF072690 | Unassigned | Unassigned | Unassigned | 546_3   | Clustered           | 4 VC_546_3   | 4   | 0.0418 | 0.92194988 | 0.0385 | 0 | 0 | 0 | 1 Ref      |
| MF074189 | Unassigned | Unassigned | Unassigned | 609_0   | Clustered           | 4 VC_609_0   | 4   | 0.489  | 0.99992419 | 0.489  | 0 | 0 | 0 | 1 Ref      |
| MF093736 | Unassigned | Unassigned | Unassigned | 575_0   | Clustered           | 35 VC_575_0  | 35  | 0.8815 | 1          | 0.8815 | 0 | 0 | 0 | 1 Ref      |
| MF098558 | Unassigned | Unassigned | Unassigned | 1090_0  | Clustered           | 4 VC_1090_0  | 4   | 1      | 1          | 1      | 0 | 0 | 0 | 1 Ref      |
| MF101922 | Unassigned | Unassigned | Unassigned | 1212_0  | Clustered           | 2 VC_1212_0  | 2   | 1      | 1          | 1      | 0 | 0 | 0 | 1 Ref      |
| MF133445 | Unassigned | Unassigned | Unassigned | 546_3   | Clustered           | 4 VC_546_3   | 4   | 0.0418 | 0.92194988 | 0.0385 | 0 | 0 | 0 | 1 Ref      |
| MF133446 | Unassigned | Unassigned | Unassigned | 519_0   | Clustered           | 39 VC_519_0  | 39  | 0.8156 | 1          | 0.8156 | 0 | 0 | 0 | 1 Ref      |
| MF140397 | Unassigned | Unassigned | Unassigned | 1166_0  | Clustered           | 20 VC_1166_0 | 20  | 0.99   | 1          | 0.99   | 0 | 0 | 0 | 1 Ref      |
| MF140398 | Unassigned | Unassigned | Unassigned | 237_1   | Clustered           | 13 VC_237_1  | 13  | 0.1773 | 1          | 0.1773 | 0 | 0 | 0 | 0.7308 Ref |
| MF140399 | Unassigned | Unassigned | Unassigned | 519_0   | Clustered           | 39 VC_519_0  | 39  | 0.8156 | 1          | 0.8156 | 0 | 0 | 0 | 1 Ref      |
| MF140400 | Unassigned | Unassigned | Unassigned | 1160_0  | Clustered           | 73 VC_1160_0 | 73  | 0.9835 | 1          | 0.9835 | 0 | 0 | 0 | 1 Ref      |
| MF140401 | Unassigned | Unassigned | Unassigned | 1164_0  | Clustered           | 25 VC_1164_0 | 25  | 0.7312 | 1          | 0.7312 | 0 | 0 | 0 | 1 Ref      |
| MF140402 | Unassigned | Unassigned | Unassigned | 234_0   | Clustered           | 21 VC_234_0  | 21  | 0.8355 | 1          | 0.8355 | 0 | 0 | 0 | 1 Ref      |
| MF140403 | Unassigned | Unassigned | Unassigned | 216_3   | Clustered           | 8 VC_216_3   | 8   | 0.0701 | 1          | 0.0701 | 0 | 0 | 0 | 0.8571 Ref |
| MF140404 | Unassigned | Unassigned | Unassigned | 1160_0  | Clustered           | 73 VC_1160_0 | 73  | 0.9835 | 1          | 0.9835 | 0 | 0 | 0 | 1 Ref      |
| MF140405 | Unassigned | Unassigned | Unassigned | 889_0   | Clustered           | 16 VC_889_0  | 16  | 0.2969 | 1          | 0.2969 | 0 | 0 | 0 | 1 Ref      |
| MF140406 | Unassigned | Unassigned | Unassigned | 237_1   | Clustered           | 13 VC_237_1  | 13  | 0.1773 | 1          | 0.1773 | 0 | 0 | 0 | 0.7308 Ref |
| MF140407 | Unassigned | Unassigned | Unassigned | 1160_0  | Clustered           | 73 VC_1160_0 | 73  | 0.9835 | 1          | 0.9835 | 0 | 0 | 0 | 1 Ref      |
| MF140409 | Unassigned | Unassigned | Unassigned | 950_0   | Clustered           | 38 VC_950_0  | 38  | 0.9443 | 1          | 0.9443 | 0 | 0 | 0 | 1 Ref      |
| MF140410 | Unassigned | Unassigned | Unassigned | 221_0   | Clustered           | 22 VC_221_0  | 22  | 0.7447 | 1          | 0.7447 | 0 | 0 | 0 | 1 Ref      |
| MF140412 | Unassigned | Unassigned | Unassigned | 236_0   | Clustered           | 72 VC_236_0  | 72  | 0.8104 | 1          | 0.8104 | 0 | 0 | 0 | 1 Ref      |
| MF140413 | Unassigned | Unassigned | Unassigned | 889_0   | Clustered           | 16 VC_889_0  | 16  | 0.2969 | 1          | 0.2969 | 0 | 0 | 0 | 1 Ref      |
| MF140414 | Unassigned | Unassigned | Unassigned | 889_0   | Clustered           | 16 VC_889_0  | 16  | 0.2969 | 1          | 0.2969 | 0 | 0 | 0 | 1 Ref      |
| MF140415 | Unassigned | Unassigned | Unassigned | 950_0   | Clustered           | 38 VC_950_0  | 38  | 0.9443 | 1          | 0.9443 | 0 | 0 | 0 | 1 Ref      |
| MF140416 | Unassigned | Unassigned | Unassigned | 236_1   | Clustered           | 5 VC_236_1   | 5   | 0.0358 | 0.99999997 | 0.0358 | 0 | 0 | 0 | 1 Ref      |
| MF140417 | Unassigned | Unassigned | Unassigned | 950_0   | Clustered           | 38 VC_950_0  | 38  | 0.9443 | 1          | 0.9443 | 0 | 0 | 0 | 1 Ref      |
| MF140418 | Unassigned | Unassigned | Unassigned | 1169_0  | Clustered           | 7 VC_1169_0  | 7   | 0.9811 | 0.99995613 | 0.981  | 0 | 0 | 0 | 1 Ref      |
| MF140419 | Unassigned | Unassigned | Unassigned | 950_0   | Clustered           | 38 VC_950_0  | 38  | 0.9443 | 1          | 0.9443 | 0 | 0 | 0 | 1 Ref      |
| MF140420 | Unassigned | Unassigned | Unassigned | 950_0   | Clustered           | 38 VC_950_0  | 38  | 0.9443 | 1          | 0.9443 | 0 | 0 | 0 | 1 Ref      |
| MF140421 | Unassigned | Unassigned | Unassigned | 889_0   | Clustered           | 16 VC_889_0  | 16  | 0.2969 | 1          | 0.2969 | 0 | 0 | 0 | 1 Ref      |
| MF140422 | Unassigned | Unassigned | Unassigned | 888_0   | Clustered           | 28 VC_888_0  | 28  | 0.5497 | 1          | 0.5497 | 0 | 0 | 0 | 1 Ref      |
| MF140423 | Unassigned | Unassigned | Unassigned | 1164_0  | Clustered           | 25 VC_1164_0 | 25  | 0.7312 | 1          | 0.7312 | 0 | 0 | 0 | 1 Ref      |
| MF140424 | Unassigned | Unassigned | Unassigned | 1160_0  | Clustered           | 73 VC_1160_0 | 73  | 0.9835 | 1          | 0.9835 | 0 | 0 | 0 | 1 Ref      |
| MF140425 | Unassigned | Unassigned | Unassigned | 1160_0  | Clustered           | 73 VC_1160_0 | 73  | 0.9835 | 1          | 0.9835 | 0 | 0 | 0 | 1 Ref      |
| MF140426 | Unassigned | Unassigned | Unassigned | 950_0   | Clustered           | 38 VC_950_0  | 38  | 0.9443 | 1          | 0.9443 | 0 | 0 | 0 | 1 Ref      |
| MF140427 | Unassigned | Unassigned | Unassigned | 1169_0  | Clustered           | 7 VC_1169_0  | 7   | 0.9811 | 0.99995613 | 0.981  | 0 | 0 | 0 | 1 Ref      |
| MF140428 | Unassigned | Unassigned | Unassigned | 236_0   | Clustered           | 72 VC_236_0  | 72  | 0.8104 | 1          | 0.8104 | 0 | 0 | 0 | 1 Ref      |



|          |            |            |            |         |                     |              |     |        |            |        |   |   |   |            |
|----------|------------|------------|------------|---------|---------------------|--------------|-----|--------|------------|--------|---|---|---|------------|
| MFI40429 | Unassigned | Unassigned | Unassigned | 950_0   | Clustered           | 38 VC_950_0  | 38  | 0.9443 | 1          | 0.9443 | 0 | 0 | 0 | 1 Ref      |
| MFI40430 | Unassigned | Unassigned | Unassigned | 236_0   | Clustered           | 72 VC_236_0  | 72  | 0.8104 | 1          | 0.8104 | 0 | 0 | 0 | 1 Ref      |
| MFI40431 | Unassigned | Unassigned | Unassigned | 950_0   | Clustered           | 38 VC_950_0  | 38  | 0.9443 | 1          | 0.9443 | 0 | 0 | 0 | 1 Ref      |
| MFI40432 | Unassigned | Unassigned | Unassigned | 1164_0  | Clustered           | 25 VC_1164_0 | 25  | 0.7312 | 1          | 0.7312 | 0 | 0 | 0 | 1 Ref      |
| MFI40433 | Unassigned | Unassigned | Unassigned | 950_0   | Clustered           | 38 VC_950_0  | 38  | 0.9443 | 1          | 0.9443 | 0 | 0 | 0 | 1 Ref      |
| MFI40434 | Unassigned | Unassigned | Unassigned | 1169_0  | Clustered           | 7 VC_1169_0  | 7   | 0.9811 | 0.99995613 | 0.981  | 0 | 0 | 0 | 1 Ref      |
| MFI40435 | Unassigned | Unassigned | Unassigned | 234_0   | Clustered           | 21 VC_234_0  | 21  | 0.8355 | 1          | 0.8355 | 0 | 0 | 0 | 1 Ref      |
| MFI41540 | Unassigned | Unassigned | Unassigned | 762_0   | Clustered           | 9 VC_762_0   | 9   | 0.0885 | 1          | 0.0885 | 0 | 0 | 0 | 1 Ref      |
| MFI50911 | Unassigned | Unassigned | Unassigned | 160_0   | Clustered           | 2 VC_160_0   | 2   | 0.4956 | 0.94363853 | 0.4677 | 0 | 0 | 0 | 1 Ref      |
| MFI53391 | Unassigned | Unassigned | Unassigned | 638_0   | Clustered           | 45 VC_638_0  | 45  | 0.7741 | 1          | 0.7741 | 0 | 0 | 0 | 1 Ref      |
| MFI55889 | Unassigned | Unassigned | Unassigned | 875_0   | Clustered           | 10 VC_875_0  | 10  | 0.988  | 0.99948433 | 0.9875 | 0 | 0 | 0 | 1 Ref      |
| MFI55936 | Unassigned | Unassigned | Unassigned | 1046_0  | Clustered           | 7 VC_1046_0  | 7   | 0.9413 | 1          | 0.9413 | 0 | 0 | 0 | 1 Ref      |
| MFI55946 | Unassigned | Unassigned | Unassigned | 1071_2  | Clustered           | 5 VC_1071_2  | 5   | 0.0534 | 0.99997362 | 0.0534 | 0 | 0 | 0 | 0.9 Ref    |
| MFI55947 | Unassigned | Unassigned | Unassigned | 371_11  | Clustered           | 31 VC_371_11 | 31  | 0.0927 | 1          | 0.0927 | 0 | 0 | 0 | 0.7011 Ref |
| MFI56577 | Unassigned | Unassigned | Unassigned | 818_0   | Clustered           | 20 VC_818_0  | 20  | 0.9601 | 1          | 0.9601 | 0 | 0 | 0 | 1 Ref      |
| MFI56578 | Unassigned | Unassigned | Unassigned | 818_0   | Clustered           | 20 VC_818_0  | 20  | 0.9601 | 1          | 0.9601 | 0 | 0 | 0 | 1 Ref      |
| MFI56580 | Unassigned | Unassigned | Unassigned | 818_0   | Clustered           | 20 VC_818_0  | 20  | 0.9601 | 1          | 0.9601 | 0 | 0 | 0 | 1 Ref      |
| MFI58036 | Unassigned | Unassigned | Unassigned | 540_0   | Clustered           | 15 VC_540_0  | 15  | 0.2866 | 1          | 0.2866 | 0 | 0 | 0 | 1 Ref      |
| MFI58037 | Unassigned | Unassigned | Unassigned | 540_0   | Clustered           | 15 VC_540_0  | 15  | 0.2866 | 1          | 0.2866 | 0 | 0 | 0 | 1 Ref      |
| MFI58038 | Unassigned | Unassigned | Unassigned | 461_0   | Clustered           | 96 VC_461_0  | 96  | 0.9307 | 1          | 0.9307 | 0 | 0 | 0 | 0.9575 Ref |
| MFI58039 | Unassigned | Unassigned | Unassigned | 455_0   | Clustered           | 18 VC_455_0  | 18  | 0.4598 | 1          | 0.4598 | 0 | 0 | 0 | 1 Ref      |
| MFI58040 | Unassigned | Unassigned | Unassigned | 330_0   | Clustered           | 27 VC_330_0  | 27  | 0.5088 | 1          | 0.5088 | 0 | 0 | 0 | 0.8661 Ref |
| MFI58041 | Unassigned | Unassigned | Unassigned | 330_0   | Clustered           | 27 VC_330_0  | 27  | 0.5088 | 1          | 0.5088 | 0 | 0 | 0 | 0.8661 Ref |
| MFI58042 | Unassigned | Unassigned | Unassigned | 455_0   | Clustered           | 18 VC_455_0  | 18  | 0.4598 | 1          | 0.4598 | 0 | 0 | 0 | 1 Ref      |
| MFI58043 | Unassigned | Unassigned | Unassigned | 330_0   | Clustered           | 27 VC_330_0  | 27  | 0.5088 | 1          | 0.5088 | 0 | 0 | 0 | 0.8661 Ref |
| MFI58044 | Unassigned | Unassigned | Unassigned | 330_0   | Clustered           | 27 VC_330_0  | 27  | 0.5088 | 1          | 0.5088 | 0 | 0 | 0 | 0.8661 Ref |
| MFI58045 | Unassigned | Unassigned | Unassigned | 283_64  | Clustered/Singleton | 1 VC_283_64  | 1   | 0      | 1          | 0      | 0 | 0 | 0 | 1 Ref      |
| MFI58046 | Unassigned | Unassigned | Unassigned | 283_189 | Clustered/Singleton | 1 VC_283_189 | 1   | 0      | 1          | 0      | 0 | 0 | 0 | 1 Ref      |
| MFI61328 | Unassigned | Unassigned | Unassigned | 252_0   | Clustered           | 121 VC_252_0 | 121 | 0.7376 | 1          | 0.7376 | 0 | 0 | 0 | 0.9999 Ref |
| MFI66859 | Unassigned | Unassigned | Unassigned | 422_0   | Clustered           | 5 VC_422_0   | 5   | 0.2592 | 0.99999997 | 0.2592 | 0 | 0 | 0 | 1 Ref      |
| MFI72979 | Unassigned | Unassigned | Unassigned | 626_0   | Clustered           | 23 VC_626_0  | 23  | 0.66   | 1          | 0.66   | 0 | 0 | 0 | 0.8379 Ref |
| MFI76161 | Unassigned | Unassigned | Unassigned | 622_0   | Clustered           | 2 VC_622_0   | 2   | 0.0507 | 0.6259393  | 0.0317 | 0 | 0 | 0 | 1 Ref      |
| MFI85717 | Unassigned | Unassigned | Unassigned | 238_0   | Clustered           | 17 VC_238_0  | 17  | 0.6109 | 1          | 0.6109 | 0 | 0 | 0 | 1 Ref      |
| MFI85718 | Unassigned | Unassigned | Unassigned | 1074_0  | Clustered           | 19 VC_1074_0 | 19  | 0.9198 | 1          | 0.9198 | 0 | 0 | 0 | 1 Ref      |
| MFI85719 | Unassigned | Unassigned | Unassigned | 238_0   | Clustered           | 17 VC_238_0  | 17  | 0.6109 | 1          | 0.6109 | 0 | 0 | 0 | 1 Ref      |
| MFI85720 | Unassigned | Unassigned | Unassigned | 238_0   | Clustered           | 17 VC_238_0  | 17  | 0.6109 | 1          | 0.6109 | 0 | 0 | 0 | 1 Ref      |
| MFI85721 | Unassigned | Unassigned | Unassigned | 1074_0  | Clustered           | 19 VC_1074_0 | 19  | 0.9198 | 1          | 0.9198 | 0 | 0 | 0 | 1 Ref      |
| MFI85722 | Unassigned | Unassigned | Unassigned | 237_0   | Clustered           | 4 VC_237_0   | 4   | 0.0429 | 0.99998759 | 0.0429 | 0 | 0 | 0 | 1 Ref      |
| MFI85723 | Unassigned | Unassigned | Unassigned | 1074_0  | Clustered           | 19 VC_1074_0 | 19  | 0.9198 | 1          | 0.9198 | 0 | 0 | 0 | 1 Ref      |
| MFI85724 | Unassigned | Unassigned | Unassigned | 1074_0  | Clustered           | 19 VC_1074_0 | 19  | 0.9198 | 1          | 0.9198 | 0 | 0 | 0 | 1 Ref      |
| MFI85725 | Unassigned | Unassigned | Unassigned | 1074_0  | Clustered           | 19 VC_1074_0 | 19  | 0.9198 | 1          | 0.9198 | 0 | 0 | 0 | 1 Ref      |
| MFI85726 | Unassigned | Unassigned | Unassigned | 887_0   | Clustered           | 18 VC_887_0  | 18  | 0.3663 | 1          | 0.3663 | 0 | 0 | 0 | 1 Ref      |
| MFI85727 | Unassigned | Unassigned | Unassigned | 216_0   | Clustered           | 4 VC_216_0   | 4   | 0.048  | 0.9999878  | 0.048  | 0 | 0 | 0 | 1 Ref      |
| MFI85728 | Unassigned | Unassigned | Unassigned | 888_0   | Clustered           | 28 VC_888_0  | 28  | 0.5497 | 1          | 0.5497 | 0 | 0 | 0 | 1 Ref      |
| MFI85729 | Unassigned | Unassigned | Unassigned | 514_0   | Clustered           | 75 VC_514_0  | 75  | 0.9402 | 1          | 0.9402 | 0 | 0 | 0 | 1 Ref      |
| MFI85730 | Unassigned | Unassigned | Unassigned | 888_0   | Clustered           | 28 VC_888_0  | 28  | 0.5497 | 1          | 0.5497 | 0 | 0 | 0 | 1 Ref      |
| MFI85731 | Unassigned | Unassigned | Unassigned | 857_0   | Clustered           | 11 VC_857_0  | 11  | 0.9712 | 1          | 0.9712 | 0 | 0 | 0 | 1 Ref      |
| MFI85732 | Unassigned | Unassigned | Unassigned | 514_0   | Clustered           | 75 VC_514_0  | 75  | 0.9402 | 1          | 0.9402 | 0 | 0 | 0 | 1 Ref      |
| MFI85733 | Unassigned | Unassigned | Unassigned | 514_0   | Clustered           | 75 VC_514_0  | 75  | 0.9402 | 1          | 0.9402 | 0 | 0 | 0 | 1 Ref      |
| MFI88997 | Unassigned | Unassigned | Unassigned | 28_1    | Clustered           | 53 VC_28_1   | 53  | 0.7164 | 1          | 0.7164 | 0 | 0 | 0 | 0.9325 Ref |
| MFI89170 | Unassigned | Unassigned | Unassigned | 802_0   | Clustered           | 17 VC_802_0  | 17  | 0.8025 | 1          | 0.8025 | 0 | 0 | 0 | 1 Ref      |
| MFI89171 | Unassigned | Unassigned | Unassigned | 802_0   | Clustered           | 17 VC_802_0  | 17  | 0.8025 | 1          | 0.8025 | 0 | 0 | 0 | 1 Ref      |
| MFI89172 | Unassigned | Unassigned | Unassigned | 802_0   | Clustered           | 17 VC_802_0  | 17  | 0.8025 | 1          | 0.8025 | 0 | 0 | 0 | 1 Ref      |
| MFI89173 | Unassigned | Unassigned | Unassigned | 802_0   | Clustered           | 17 VC_802_0  | 17  | 0.8025 | 1          | 0.8025 | 0 | 0 | 0 | 1 Ref      |
| MFI89174 | Unassigned | Unassigned | Unassigned | 802_0   | Clustered           | 17 VC_802_0  | 17  | 0.8025 | 1          | 0.8025 | 0 | 0 | 0 | 1 Ref      |
| MFI89175 | Unassigned | Unassigned | Unassigned | 802_0   | Clustered           | 17 VC_802_0  | 17  | 0.8025 | 1          | 0.8025 | 0 | 0 | 0 | 1 Ref      |
| MFI89176 | Unassigned | Unassigned | Unassigned | 1073_0  | Clustered           | 24 VC_1073_0 | 24  | 0.8388 | 1          | 0.8388 | 0 | 0 | 0 | 1 Ref      |
| MFI89177 | Unassigned | Unassigned | Unassigned | 1073_0  | Clustered           | 24 VC_1073_0 | 24  | 0.8388 | 1          | 0.8388 | 0 | 0 | 0 | 1 Ref      |
| MFI89178 | Unassigned | Unassigned | Unassigned | 1073_0  | Clustered           | 24 VC_1073_0 | 24  | 0.8388 | 1          | 0.8388 | 0 | 0 | 0 | 1 Ref      |
| MFI89179 | Unassigned | Unassigned | Unassigned | 956_0   | Clustered           | 39 VC_956_0  | 39  | 1      | 1          | 1      | 0 | 0 | 0 | 1 Ref      |
| MFI97383 | Unassigned | Unassigned | Unassigned | 1200_0  | Clustered           | 4 VC_1200_0  | 4   | 0.8691 | 0.9999992  | 0.8691 | 0 | 0 | 0 | 1 Ref      |
| MF276773 | Unassigned | Unassigned | Unassigned | 228_0   | Clustered           | 60 VC_228_0  | 60  | 0.942  | 1          | 0.942  | 0 | 0 | 0 | 1 Ref      |
| MF278336 | Unassigned | Unassigned | Unassigned | 988_0   | Clustered           | 2 VC_988_0   | 2   | 0.1586 | 0.95268934 | 0.1511 | 0 | 0 | 0 | 1 Ref      |
| MF281061 | Unassigned | Unassigned | Unassigned | 519_0   | Clustered           | 39 VC_519_0  | 39  | 0.8156 | 1          | 0.8156 | 0 | 0 | 0 | 1 Ref      |
| MF285615 | Unassigned | Unassigned | Unassigned | 823_0   | Clustered           | 124 VC_823_0 | 124 | 0.9492 | 1          | 0.9492 | 0 | 0 | 0 | 1 Ref      |
| MF285616 | Unassigned | Unassigned | Unassigned | 385_0   | Clustered           | 51 VC_385_0  | 51  | 0.8754 | 1          | 0.8754 | 0 | 0 | 0 | 1 Ref      |
| MF285617 | Unassigned | Unassigned | Unassigned | 385_0   | Clustered           | 51 VC_385_0  | 51  | 0.8754 | 1          | 0.8754 | 0 | 0 | 0 | 1 Ref      |
| MF285618 | Unassigned | Unassigned | Unassigned | 488_1   | Clustered           | 8 VC_488_1   | 8   | 0.2927 | 1          | 0.2927 | 0 | 0 | 0 | 1 Ref      |
| MF285619 | Unassigned | Unassigned | Unassigned | 132_0   | Clustered           | 4 VC_132_0   | 4   | 0.036  | 0.99998777 | 0.036  | 0 | 0 | 0 | 1 Ref      |
| MF285620 | Unassigned | Unassigned | Unassigned | 385_0   | Clustered           | 51 VC_385_0  | 51  | 0.8754 | 1          | 0.8754 | 0 | 0 | 0 | 1 Ref      |
| MF288917 | Unassigned | Unassigned | Unassigned | 884_0   | Clustered           | 28 VC_884_0  | 28  | 0.6211 | 1          | 0.6211 | 0 | 0 | 0 | 0.9841 Ref |
| MF288918 | Unassigned | Unassigned | Unassigned | 884_0   | Clustered           | 28 VC_884_0  | 28  | 0.6211 | 1          | 0.6211 | 0 | 0 | 0 | 0.9841 Ref |
| MF288919 | Unassigned | Unassigned | Unassigned | 884_0   | Clustered           | 28 VC_884_0  | 28  | 0.6211 | 1          | 0.6211 | 0 | 0 | 0 | 0.9841 Ref |
| MF288920 | Unassigned | Unassigned | Unassigned | 884_0   | Clustered           | 28 VC_884_0  | 28  | 0.6211 | 1          | 0.6211 | 0 | 0 | 0 | 0.9841 Ref |
| MF288921 | Unassigned | Unassigned | Unassigned | 883_0   | Clustered           | 10 VC_883_0  | 10  | 0.2015 | 1          | 0.2015 | 0 | 0 | 0 | 1 Ref      |
| MF288922 | Unassigned | Unassigned | Unassigned | 883_0   | Clustered           | 10 VC_883_0  | 10  | 0.2015 | 1          | 0.2015 | 0 | 0 | 0 | 1 Ref      |
| MF319184 | Unassigned | Unassigned | Unassigned | 763_2   | Clustered           | 7 VC_763_2   | 7   | 0.2612 | 1          | 0.2612 | 0 | 0 | 0 | 1 Ref      |
| MF324898 | Unassigned | Unassigned | Unassigned | 956_0   | Clustered           | 39 VC_956_0  | 39  | 1      | 1          | 1      | 0 | 0 | 0 | 1 Ref      |
| MF324899 | Unassigned | Unassigned | Unassigned | 216_0   | Clustered           | 4 VC_216_0   | 4   | 0.048  | 0.9999878  | 0.048  | 0 | 0 | 0 | 1 Ref      |
| MF324900 | Unassigned | Unassigned | Unassigned | 956_0   | Clustered           | 39 VC_956_0  | 39  | 1      | 1          | 1      | 0 | 0 | 0 | 1 Ref      |
| MF324901 | Unassigned | Unassigned | Unassigned | 956_0   | Clustered           | 39 VC_956_0  | 39  | 1      | 1          | 1      | 0 | 0 | 0 | 1 Ref      |



|           |            |            |            |         |                     |              |     |        |            |        |   |   |   |            |
|-----------|------------|------------|------------|---------|---------------------|--------------|-----|--------|------------|--------|---|---|---|------------|
| MF324902  | Unassigned | Unassigned | Unassigned | 956_0   | Clustered           | 39 VC_956_0  | 39  | 1      | 1          | 1      | 0 | 0 | 0 | 1 Ref      |
| MF324903  | Unassigned | Unassigned | Unassigned | 956_0   | Clustered           | 39 VC_956_0  | 39  | 1      | 1          | 1      | 0 | 0 | 0 | 1 Ref      |
| MF324904  | Unassigned | Unassigned | Unassigned | 956_0   | Clustered           | 39 VC_956_0  | 39  | 1      | 1          | 1      | 0 | 0 | 0 | 1 Ref      |
| MF324905  | Unassigned | Unassigned | Unassigned | 956_0   | Clustered           | 39 VC_956_0  | 39  | 1      | 1          | 1      | 0 | 0 | 0 | 1 Ref      |
| MF324906  | Unassigned | Unassigned | Unassigned | 802_0   | Clustered           | 17 VC_802_0  | 17  | 0.8025 | 1          | 0.8025 | 0 | 0 | 0 | 1 Ref      |
| MF324907  | Unassigned | Unassigned | Unassigned | 1073_0  | Clustered           | 24 VC_1073_0 | 24  | 0.8388 | 1          | 0.8388 | 0 | 0 | 0 | 1 Ref      |
| MF324908  | Unassigned | Unassigned | Unassigned | 237_2   | Clustered           | 11 VC_237_2  | 11  | 0.1409 | 1          | 0.1409 | 0 | 0 | 0 | 0.9818 Ref |
| MF324909  | Unassigned | Unassigned | Unassigned | 237_2   | Clustered           | 11 VC_237_2  | 11  | 0.1409 | 1          | 0.1409 | 0 | 0 | 0 | 0.9818 Ref |
| MF324910  | Unassigned | Unassigned | Unassigned | 888_0   | Clustered           | 28 VC_888_0  | 28  | 0.5497 | 1          | 0.5497 | 0 | 0 | 0 | 1 Ref      |
| MF324911  | Unassigned | Unassigned | Unassigned | 237_2   | Clustered           | 11 VC_237_2  | 11  | 0.1409 | 1          | 0.1409 | 0 | 0 | 0 | 0.9818 Ref |
| MF324912  | Unassigned | Unassigned | Unassigned | 237_2   | Clustered           | 11 VC_237_2  | 11  | 0.1409 | 1          | 0.1409 | 0 | 0 | 0 | 0.9818 Ref |
| MF324913  | Unassigned | Unassigned | Unassigned | 237_2   | Clustered           | 11 VC_237_2  | 11  | 0.1409 | 1          | 0.1409 | 0 | 0 | 0 | 0.9818 Ref |
| MF324914  | Unassigned | Unassigned | Unassigned | 237_2   | Clustered           | 11 VC_237_2  | 11  | 0.1409 | 1          | 0.1409 | 0 | 0 | 0 | 0.9818 Ref |
| MF324915  | Unassigned | Unassigned | Unassigned | 237_1   | Clustered           | 13 VC_237_1  | 13  | 0.1773 | 1          | 0.1773 | 0 | 0 | 0 | 0.7308 Ref |
| MF327003  | Unassigned | Unassigned | Unassigned | 330_0   | Clustered           | 27 VC_330_0  | 27  | 0.5088 | 1          | 0.5088 | 0 | 0 | 0 | 0.8661 Ref |
| MF327004  | Unassigned | Unassigned | Unassigned | 330_0   | Clustered           | 27 VC_330_0  | 27  | 0.5088 | 1          | 0.5088 | 0 | 0 | 0 | 0.8661 Ref |
| MF327005  | Unassigned | Unassigned | Unassigned | 330_0   | Clustered           | 27 VC_330_0  | 27  | 0.5088 | 1          | 0.5088 | 0 | 0 | 0 | 0.8661 Ref |
| MF327006  | Unassigned | Unassigned | Unassigned | 590_0   | Clustered           | 27 VC_590_0  | 27  | 0.9947 | 1          | 0.9947 | 0 | 0 | 0 | 1 Ref      |
| MF327007  | Unassigned | Unassigned | Unassigned | 283_158 | Clustered/Singleton | 1 VC_283_158 | 1   | 0      | 1          | 0      | 0 | 0 | 0 | 1 Ref      |
| MF327008  | Unassigned | Unassigned | Unassigned | 283_19  | Clustered/Singleton | 1 VC_283_19  | 1   | 0      | 1          | 0      | 0 | 0 | 0 | 1 Ref      |
| MF327009  | Unassigned | Unassigned | Unassigned | 283_20  | Clustered/Singleton | 1 VC_283_20  | 1   | 0      | 1          | 0      | 0 | 0 | 0 | 1 Ref      |
| MF346584  | Unassigned | Unassigned | Unassigned | 698_0   | Clustered           | 26 VC_698_0  | 26  | 0.9366 | 1          | 0.9366 | 0 | 0 | 0 | 1 Ref      |
| MF346933  | Unassigned | Unassigned | Unassigned | 202_0   | Clustered           | 102 VC_202_0 | 102 | 0.4049 | 1          | 0.4049 | 0 | 0 | 0 | 0.7876 Ref |
| MF347636  | Unassigned | Unassigned | Unassigned | 1071_3  | Clustered           | 16 VC_1071_3 | 16  | 0.2354 | 1          | 0.2354 | 0 | 0 | 0 | 0.9667 Ref |
| MF347637  | Unassigned | Unassigned | Unassigned | 1071_3  | Clustered           | 16 VC_1071_3 | 16  | 0.2354 | 1          | 0.2354 | 0 | 0 | 0 | 0.9667 Ref |
| MF347638  | Unassigned | Unassigned | Unassigned | 1071_3  | Clustered           | 16 VC_1071_3 | 16  | 0.2354 | 1          | 0.2354 | 0 | 0 | 0 | 0.9667 Ref |
| MF347639  | Unassigned | Unassigned | Unassigned | 1071_3  | Clustered           | 16 VC_1071_3 | 16  | 0.2354 | 1          | 0.2354 | 0 | 0 | 0 | 0.9667 Ref |
| MF351863  | Unassigned | Unassigned | Unassigned | 432_3   | Clustered/Singleton | 1 VC_432_3   | 1   | 0      | 1          | 0      | 0 | 0 | 0 | 1 Ref      |
| MF356679  | Unassigned | Unassigned | Unassigned | 247_1   | Clustered/Singleton | 1 VC_247_1   | 1   | 0      | 1          | 0      | 0 | 0 | 0 | 1 Ref      |
| MF358541  | Unassigned | Unassigned | Unassigned | 1071_3  | Clustered           | 16 VC_1071_3 | 16  | 0.2354 | 1          | 0.2354 | 0 | 0 | 0 | 0.9667 Ref |
| MF358542  | Unassigned | Unassigned | Unassigned | 1071_3  | Clustered           | 16 VC_1071_3 | 16  | 0.2354 | 1          | 0.2354 | 0 | 0 | 0 | 0.9667 Ref |
| MF360957  | Unassigned | Unassigned | Unassigned | 448_0   | Clustered           | 4 VC_448_0   | 4   | 0.3059 | 0.99978853 | 0.3058 | 0 | 0 | 0 | 1 Ref      |
| MF370225  | Unassigned | Unassigned | Unassigned | 329_1   | Clustered           | 17 VC_329_1  | 17  | 0.0867 | 1          | 0.0867 | 0 | 0 | 0 | 0.8235 Ref |
| MF370964  | Unassigned | Unassigned | Unassigned | 496_1   | Clustered/Singleton | 1 VC_496_1   | 1   | 0      | 1          | 0      | 0 | 0 | 0 | 1 Ref      |
| MF370965  | Unassigned | Unassigned | Unassigned | 896_0   | Clustered           | 5 VC_896_0   | 5   | 0.4981 | 0.99999977 | 0.4981 | 0 | 0 | 0 | 1 Ref      |
| MF373840  | Unassigned | Unassigned | Unassigned | 513_0   | Clustered           | 32 VC_513_0  | 32  | 0.6881 | 1          | 0.6881 | 0 | 0 | 0 | 1 Ref      |
| MF373841  | Unassigned | Unassigned | Unassigned | 237_1   | Clustered           | 13 VC_237_1  | 13  | 0.1773 | 1          | 0.1773 | 0 | 0 | 0 | 0.7308 Ref |
| MF373842  | Unassigned | Unassigned | Unassigned | 956_0   | Clustered           | 39 VC_956_0  | 39  | 1      | 1          | 1      | 0 | 0 | 0 | 1 Ref      |
| MF373843  | Unassigned | Unassigned | Unassigned | 519_0   | Clustered           | 39 VC_519_0  | 39  | 0.8156 | 1          | 0.8156 | 0 | 0 | 0 | 1 Ref      |
| MF374379  | Unassigned | Unassigned | Unassigned | 43_0    | Clustered           | 38 VC_43_0   | 38  | 0.5885 | 1          | 0.5885 | 0 | 0 | 0 | 0.9659 Ref |
| MF375456  | Unassigned | Unassigned | Unassigned | 74_0    | Clustered           | 15 VC_74_0   | 15  | 0.5204 | 1          | 0.5204 | 0 | 0 | 0 | 1 Ref      |
| MF377440  | Unassigned | Unassigned | Unassigned | 236_0   | Clustered           | 72 VC_236_0  | 72  | 0.8104 | 1          | 0.8104 | 0 | 0 | 0 | 1 Ref      |
| MF377441  | Unassigned | Unassigned | Unassigned | 1073_0  | Clustered           | 24 VC_1073_0 | 24  | 0.8388 | 1          | 0.8388 | 0 | 0 | 0 | 1 Ref      |
| MF377442  | Unassigned | Unassigned | Unassigned | 1073_0  | Clustered           | 24 VC_1073_0 | 24  | 0.8388 | 1          | 0.8388 | 0 | 0 | 0 | 1 Ref      |
| MF398190  | Unassigned | Unassigned | Unassigned | 149_8   | Clustered           | 66 VC_149_8  | 66  | 0.4565 | 1          | 0.4565 | 0 | 0 | 0 | 0.8182 Ref |
| MF4002939 | Unassigned | Unassigned | Unassigned | 190_18  | Clustered/Singleton | 1 VC_190_18  | 1   | 0      | 1          | 0      | 0 | 0 | 0 | 1 Ref      |
| MF4003005 | Unassigned | Unassigned | Unassigned | 987_0   | Clustered           | 22 VC_987_0  | 22  | 0.8955 | 1          | 0.8955 | 0 | 0 | 0 | 1 Ref      |
| MF4003006 | Unassigned | Unassigned | Unassigned | 987_0   | Clustered           | 22 VC_987_0  | 22  | 0.8955 | 1          | 0.8955 | 0 | 0 | 0 | 1 Ref      |
| MF4003007 | Unassigned | Unassigned | Unassigned | 1052_2  | Clustered/Singleton | 1 VC_1052_2  | 1   | 0      | 1          | 0      | 0 | 0 | 0 | 1 Ref      |
| MF4005094 | Unassigned | Unassigned | Unassigned | 149_8   | Clustered           | 66 VC_149_8  | 66  | 0.4565 | 1          | 0.4565 | 0 | 0 | 0 | 0.8182 Ref |
| MF407276  | Unassigned | Unassigned | Unassigned | 817_0   | Clustered           | 14 VC_817_0  | 14  | 0.6342 | 1          | 0.6342 | 0 | 0 | 0 | 1 Ref      |
| MF415412  | Unassigned | Unassigned | Unassigned | 938_0   | Clustered           | 99 VC_938_0  | 99  | 0.9119 | 1          | 0.9119 | 0 | 0 | 0 | 0.9928 Ref |
| MF418016  | Unassigned | Unassigned | Unassigned | 88_1    | Clustered/Singleton | 1 VC_88_1    | 1   | 0      | 1          | 0      | 0 | 0 | 0 | 1 Ref      |
| MF422185  | Unassigned | Unassigned | Unassigned | 85_3    | Clustered           | 19 VC_85_3   | 19  | 0.3671 | 1          | 0.3671 | 0 | 0 | 0 | 0.807 Ref  |
| MF428478  | Unassigned | Unassigned | Unassigned | 11_0    | Clustered           | 19 VC_11_0   | 19  | 0.7562 | 1          | 0.7562 | 0 | 0 | 0 | 1 Ref      |
| MF428479  | Unassigned | Unassigned | Unassigned | 11_0    | Clustered           | 19 VC_11_0   | 19  | 0.7562 | 1          | 0.7562 | 0 | 0 | 0 | 1 Ref      |
| MF428480  | Unassigned | Unassigned | Unassigned | 11_0    | Clustered           | 19 VC_11_0   | 19  | 0.7562 | 1          | 0.7562 | 0 | 0 | 0 | 1 Ref      |
| MF428481  | Unassigned | Unassigned | Unassigned | 11_0    | Clustered           | 19 VC_11_0   | 19  | 0.7562 | 1          | 0.7562 | 0 | 0 | 0 | 1 Ref      |
| MF431252  | Unassigned | Unassigned | Unassigned | 637_0   | Clustered           | 115 VC_637_0 | 115 | 0.731  | 1          | 0.731  | 0 | 0 | 0 | 0.8764 Ref |
| MF431615  | Unassigned | Unassigned | Unassigned | 304_0   | Clustered           | 11 VC_304_0  | 11  | 0.7869 | 1          | 0.7869 | 0 | 0 | 0 | 1 Ref      |
| MF431616  | Unassigned | Unassigned | Unassigned | 304_0   | Clustered           | 11 VC_304_0  | 11  | 0.7869 | 1          | 0.7869 | 0 | 0 | 0 | 1 Ref      |
| MF431617  | Unassigned | Unassigned | Unassigned | 304_0   | Clustered           | 11 VC_304_0  | 11  | 0.7869 | 1          | 0.7869 | 0 | 0 | 0 | 1 Ref      |
| MF431726  | Unassigned | Unassigned | Unassigned | 530_0   | Clustered           | 9 VC_530_0   | 9   | 0.8027 | 1          | 0.8027 | 0 | 0 | 0 | 1 Ref      |
| MF431730  | Unassigned | Unassigned | Unassigned | 190_7   | Clustered           | 7 VC_190_7   | 7   | 0.0476 | 1          | 0.0476 | 0 | 0 | 0 | 1 Ref      |
| MF431731  | Unassigned | Unassigned | Unassigned | 190_7   | Clustered           | 7 VC_190_7   | 7   | 0.0476 | 1          | 0.0476 | 0 | 0 | 0 | 1 Ref      |
| MF431732  | Unassigned | Unassigned | Unassigned | 190_7   | Clustered           | 7 VC_190_7   | 7   | 0.0476 | 1          | 0.0476 | 0 | 0 | 0 | 1 Ref      |
| MF431733  | Unassigned | Unassigned | Unassigned | 190_7   | Clustered           | 7 VC_190_7   | 7   | 0.0476 | 1          | 0.0476 | 0 | 0 | 0 | 1 Ref      |
| MF431734  | Unassigned | Unassigned | Unassigned | 190_7   | Clustered           | 7 VC_190_7   | 7   | 0.0476 | 1          | 0.0476 | 0 | 0 | 0 | 1 Ref      |
| MF431735  | Unassigned | Unassigned | Unassigned | 190_7   | Clustered           | 7 VC_190_7   | 7   | 0.0476 | 1          | 0.0476 | 0 | 0 | 0 | 1 Ref      |
| MF431736  | Unassigned | Unassigned | Unassigned | 191_32  | Clustered           | 12 VC_191_32 | 12  | 0.0683 | 1          | 0.0683 | 0 | 0 | 0 | 0.7576 Ref |
| MF431737  | Unassigned | Unassigned | Unassigned | 191_32  | Clustered           | 12 VC_191_32 | 12  | 0.0683 | 1          | 0.0683 | 0 | 0 | 0 | 0.7576 Ref |
| MF431738  | Unassigned | Unassigned | Unassigned | 191_32  | Clustered           | 12 VC_191_32 | 12  | 0.0683 | 1          | 0.0683 | 0 | 0 | 0 | 0.7576 Ref |
| MF431739  | Unassigned | Unassigned | Unassigned | 191_32  | Clustered           | 12 VC_191_32 | 12  | 0.0683 | 1          | 0.0683 | 0 | 0 | 0 | 0.7576 Ref |
| MF431740  | Unassigned | Unassigned | Unassigned | 191_32  | Clustered           | 12 VC_191_32 | 12  | 0.0683 | 1          | 0.0683 | 0 | 0 | 0 | 0.7576 Ref |
| MF431741  | Unassigned | Unassigned | Unassigned | 191_32  | Clustered           | 12 VC_191_32 | 12  | 0.0683 | 1          | 0.0683 | 0 | 0 | 0 | 0.7576 Ref |
| MF443119  | Unassigned | Unassigned | Unassigned | 690_0   | Clustered           | 50 VC_690_0  | 50  | 0.9805 | 1          | 0.9805 | 0 | 0 | 0 | 1 Ref      |
| MF443120  | Unassigned | Unassigned | Unassigned | 690_0   | Clustered           | 50 VC_690_0  | 50  | 0.9805 | 1          | 0.9805 | 0 | 0 | 0 | 1 Ref      |
| MF443121  | Unassigned | Unassigned | Unassigned | 690_0   | Clustered           | 50 VC_690_0  | 50  | 0.9805 | 1          | 0.9805 | 0 | 0 | 0 | 1 Ref      |
| MF443122  | Unassigned | Unassigned | Unassigned | 690_0   | Clustered           | 50 VC_690_0  | 50  | 0.9805 | 1          | 0.9805 | 0 | 0 | 0 | 1 Ref      |
| MF443123  | Unassigned | Unassigned | Unassigned | 690_0   | Clustered           | 50 VC_690_0  | 50  | 0.9805 | 1          | 0.9805 | 0 | 0 | 0 | 1 Ref      |
| MF443124  | Unassigned | Unassigned | Unassigned | 690_0   | Clustered           | 50 VC_690_0  | 50  | 0.9805 | 1          | 0.9805 | 0 | 0 | 0 | 1 Ref      |



|          |            |            |            |        |           |              |     |        |            |        |   |   |   |            |
|----------|------------|------------|------------|--------|-----------|--------------|-----|--------|------------|--------|---|---|---|------------|
| MF443125 | Unassigned | Unassigned | Unassigned | 690.0  | Clustered | 50 VC_690.0  | 50  | 0.9805 | 1          | 0.9805 | 0 | 0 | 0 | 1 Ref      |
| MF443126 | Unassigned | Unassigned | Unassigned | 690.0  | Clustered | 50 VC_690.0  | 50  | 0.9805 | 1          | 0.9805 | 0 | 0 | 0 | 1 Ref      |
| MF443783 | Unassigned | Unassigned | Unassigned | 1213_0 | Clustered | 2 VC_1213_0  | 2   | 1      | 1          | 1      | 0 | 0 | 0 | 1 Ref      |
| MF443784 | Unassigned | Unassigned | Unassigned | 1213_0 | Clustered | 2 VC_1213_0  | 2   | 1      | 1          | 1      | 0 | 0 | 0 | 1 Ref      |
| MF448340 | Unassigned | Unassigned | Unassigned | 443_2  | Clustered | 10 VC_443_2  | 10  | 0.3344 | 1          | 0.3344 | 0 | 0 | 0 | 0.9333 Ref |
| MF448554 | Unassigned | Unassigned | Unassigned | 202_0  | Clustered | 102 VC_202_0 | 102 | 0.4049 | 1          | 0.4049 | 0 | 0 | 0 | 0.7876 Ref |
| MF448555 | Unassigned | Unassigned | Unassigned | 202_0  | Clustered | 102 VC_202_0 | 102 | 0.4049 | 1          | 0.4049 | 0 | 0 | 0 | 0.7876 Ref |
| MF448556 | Unassigned | Unassigned | Unassigned | 202_0  | Clustered | 102 VC_202_0 | 102 | 0.4049 | 1          | 0.4049 | 0 | 0 | 0 | 0.7876 Ref |
| MF448557 | Unassigned | Unassigned | Unassigned | 202_0  | Clustered | 102 VC_202_0 | 102 | 0.4049 | 1          | 0.4049 | 0 | 0 | 0 | 0.7876 Ref |
| MF448558 | Unassigned | Unassigned | Unassigned | 202_0  | Clustered | 102 VC_202_0 | 102 | 0.4049 | 1          | 0.4049 | 0 | 0 | 0 | 0.7876 Ref |
| MF448559 | Unassigned | Unassigned | Unassigned | 202_0  | Clustered | 102 VC_202_0 | 102 | 0.4049 | 1          | 0.4049 | 0 | 0 | 0 | 0.7876 Ref |
| MF448560 | Unassigned | Unassigned | Unassigned | 202_0  | Clustered | 102 VC_202_0 | 102 | 0.4049 | 1          | 0.4049 | 0 | 0 | 0 | 0.7876 Ref |
| MF448561 | Unassigned | Unassigned | Unassigned | 202_0  | Clustered | 102 VC_202_0 | 102 | 0.4049 | 1          | 0.4049 | 0 | 0 | 0 | 0.7876 Ref |
| MF448562 | Unassigned | Unassigned | Unassigned | 202_0  | Clustered | 102 VC_202_0 | 102 | 0.4049 | 1          | 0.4049 | 0 | 0 | 0 | 0.7876 Ref |
| MF448563 | Unassigned | Unassigned | Unassigned | 202_0  | Clustered | 102 VC_202_0 | 102 | 0.4049 | 1          | 0.4049 | 0 | 0 | 0 | 0.7876 Ref |
| MF448564 | Unassigned | Unassigned | Unassigned | 202_0  | Clustered | 102 VC_202_0 | 102 | 0.4049 | 1          | 0.4049 | 0 | 0 | 0 | 0.7876 Ref |
| MF448565 | Unassigned | Unassigned | Unassigned | 202_0  | Clustered | 102 VC_202_0 | 102 | 0.4049 | 1          | 0.4049 | 0 | 0 | 0 | 0.7876 Ref |
| MF448566 | Unassigned | Unassigned | Unassigned | 202_0  | Clustered | 102 VC_202_0 | 102 | 0.4049 | 1          | 0.4049 | 0 | 0 | 0 | 0.7876 Ref |
| MF448567 | Unassigned | Unassigned | Unassigned | 202_0  | Clustered | 102 VC_202_0 | 102 | 0.4049 | 1          | 0.4049 | 0 | 0 | 0 | 0.7876 Ref |
| MF448568 | Unassigned | Unassigned | Unassigned | 202_0  | Clustered | 102 VC_202_0 | 102 | 0.4049 | 1          | 0.4049 | 0 | 0 | 0 | 0.7876 Ref |
| MF448569 | Unassigned | Unassigned | Unassigned | 202_0  | Clustered | 102 VC_202_0 | 102 | 0.4049 | 1          | 0.4049 | 0 | 0 | 0 | 0.7876 Ref |
| MF448570 | Unassigned | Unassigned | Unassigned | 202_0  | Clustered | 102 VC_202_0 | 102 | 0.4049 | 1          | 0.4049 | 0 | 0 | 0 | 0.7876 Ref |
| MF448571 | Unassigned | Unassigned | Unassigned | 202_0  | Clustered | 102 VC_202_0 | 102 | 0.4049 | 1          | 0.4049 | 0 | 0 | 0 | 0.7876 Ref |
| MF448572 | Unassigned | Unassigned | Unassigned | 202_0  | Clustered | 102 VC_202_0 | 102 | 0.4049 | 1          | 0.4049 | 0 | 0 | 0 | 0.7876 Ref |
| MF467948 | Unassigned | Unassigned | Unassigned | 872_0  | Clustered | 31 VC_872_0  | 31  | 0.8151 | 1          | 0.8151 | 0 | 0 | 0 | 0.8194 Ref |
| MF467949 | Unassigned | Unassigned | Unassigned | 872_0  | Clustered | 31 VC_872_0  | 31  | 0.8151 | 1          | 0.8151 | 0 | 0 | 0 | 0.8194 Ref |
| MF468274 | Unassigned | Unassigned | Unassigned | 575_0  | Clustered | 35 VC_575_0  | 35  | 0.8815 | 1          | 0.8815 | 0 | 0 | 0 | 1 Ref      |
| MF472892 | Unassigned | Unassigned | Unassigned | 236.0  | Clustered | 72 VC_236.0  | 72  | 0.8104 | 1          | 0.8104 | 0 | 0 | 0 | 1 Ref      |
| MF472894 | Unassigned | Unassigned | Unassigned | 519_0  | Clustered | 39 VC_519_0  | 39  | 0.8156 | 1          | 0.8156 | 0 | 0 | 0 | 1 Ref      |
| MF472896 | Unassigned | Unassigned | Unassigned | 216.6  | Clustered | 42 VC_216.6  | 42  | 0.473  | 1          | 0.473  | 0 | 0 | 0 | 0.8351 Ref |
| MF476925 | Unassigned | Unassigned | Unassigned | 598_0  | Clustered | 4 VC_598_0   | 4   | 0.0597 | 0.99355358 | 0.0593 | 0 | 0 | 0 | 1 Ref      |
| MF479730 | Unassigned | Unassigned | Unassigned | 600_2  | Clustered | 10 VC_600_2  | 10  | 0.3041 | 1          | 0.3041 | 0 | 0 | 0 | 1 Ref      |
| MF481197 | Unassigned | Unassigned | Unassigned | 1027_0 | Clustered | 20 VC_1027_0 | 20  | 0.7114 | 1          | 0.7114 | 0 | 0 | 0 | 1 Ref      |
| MF490236 | Unassigned | Unassigned | Unassigned | 838_0  | Clustered | 29 VC_838_0  | 29  | 0.8611 | 1          | 0.8611 | 0 | 0 | 0 | 1 Ref      |
| MF490237 | Unassigned | Unassigned | Unassigned | 630_0  | Clustered | 20 VC_630_0  | 20  | 0.8513 | 1          | 0.8513 | 0 | 0 | 0 | 1 Ref      |
| MF490238 | Unassigned | Unassigned | Unassigned | 838_0  | Clustered | 29 VC_838_0  | 29  | 0.8611 | 1          | 0.8611 | 0 | 0 | 0 | 1 Ref      |
| MF490239 | Unassigned | Unassigned | Unassigned | 166_0  | Clustered | 26 VC_166_0  | 26  | 0.7923 | 1          | 0.7923 | 0 | 0 | 0 | 1 Ref      |
| MF490240 | Unassigned | Unassigned | Unassigned | 79_0   | Clustered | 64 VC_79_0   | 64  | 0.4185 | 1          | 0.4185 | 0 | 0 | 0 | 0.7649 Ref |
| MF490241 | Unassigned | Unassigned | Unassigned | 79_7   | Clustered | 33 VC_79_7   | 33  | 0.216  | 1          | 0.216  | 0 | 0 | 0 | 0.8409 Ref |
| MF498773 | Unassigned | Unassigned | Unassigned | 443_2  | Clustered | 10 VC_443_2  | 10  | 0.3344 | 1          | 0.3344 | 0 | 0 | 0 | 0.9333 Ref |
| MF498775 | Unassigned | Unassigned | Unassigned | 443_2  | Clustered | 10 VC_443_2  | 10  | 0.3344 | 1          | 0.3344 | 0 | 0 | 0 | 0.9333 Ref |
| MF498901 | Unassigned | Unassigned | Unassigned | 883_0  | Clustered | 10 VC_883_0  | 10  | 0.2015 | 1          | 0.2015 | 0 | 0 | 0 | 1 Ref      |
| MF537628 | Unassigned | Unassigned | Unassigned | 956_0  | Clustered | 39 VC_956_0  | 39  | 1      | 1          | 1      | 0 | 0 | 0 | 1 Ref      |
| MF541403 | Unassigned | Unassigned | Unassigned | 982_0  | Clustered | 62 VC_982_0  | 62  | 0.8646 | 1          | 0.8646 | 0 | 0 | 0 | 0.743 Ref  |
| MF541404 | Unassigned | Unassigned | Unassigned | 982_0  | Clustered | 62 VC_982_0  | 62  | 0.8646 | 1          | 0.8646 | 0 | 0 | 0 | 0.743 Ref  |
| MF541405 | Unassigned | Unassigned | Unassigned | 982_0  | Clustered | 62 VC_982_0  | 62  | 0.8646 | 1          | 0.8646 | 0 | 0 | 0 | 0.743 Ref  |
| MF541406 | Unassigned | Unassigned | Unassigned | 982_0  | Clustered | 62 VC_982_0  | 62  | 0.8646 | 1          | 0.8646 | 0 | 0 | 0 | 0.743 Ref  |
| MF541407 | Unassigned | Unassigned | Unassigned | 982_0  | Clustered | 62 VC_982_0  | 62  | 0.8646 | 1          | 0.8646 | 0 | 0 | 0 | 0.743 Ref  |
| MF541408 | Unassigned | Unassigned | Unassigned | 982_0  | Clustered | 62 VC_982_0  | 62  | 0.8646 | 1          | 0.8646 | 0 | 0 | 0 | 0.743 Ref  |
| MF541409 | Unassigned | Unassigned | Unassigned | 982_0  | Clustered | 62 VC_982_0  | 62  | 0.8646 | 1          | 0.8646 | 0 | 0 | 0 | 0.743 Ref  |
| MF541410 | Unassigned | Unassigned | Unassigned | 982_0  | Clustered | 62 VC_982_0  | 62  | 0.8646 | 1          | 0.8646 | 0 | 0 | 0 | 0.743 Ref  |
| MF547662 | Unassigned | Unassigned | Unassigned | 473_3  | Clustered | 2 VC_473_3   | 2   | 0.1063 | 0.94203251 | 0.1001 | 0 | 0 | 0 | 1 Ref      |
| MF547663 | Unassigned | Unassigned | Unassigned | 473_3  | Clustered | 2 VC_473_3   | 2   | 0.1063 | 0.94203251 | 0.1001 | 0 | 0 | 0 | 1 Ref      |
| MF564201 | Unassigned | Unassigned | Unassigned | 942_0  | Clustered | 36 VC_942_0  | 36  | 0.7848 | 1          | 0.7848 | 0 | 0 | 0 | 1 Ref      |
| MF574151 | Unassigned | Unassigned | Unassigned | 82_0   | Clustered | 24 VC_82_0   | 24  | 0.7351 | 1          | 0.7351 | 0 | 0 | 0 | 1 Ref      |
| MF580410 | Unassigned | Unassigned | Unassigned | 8_0    | Clustered | 58 VC_8_0    | 58  | 0.8306 | 1          | 0.8306 | 0 | 0 | 0 | 0.9946 Ref |
| MF580759 | Unassigned | Unassigned | Unassigned | 252_0  | Clustered | 121 VC_252_0 | 121 | 0.7376 | 1          | 0.7376 | 0 | 0 | 0 | 0.9999 Ref |
| MF580760 | Unassigned | Unassigned | Unassigned | 252_0  | Clustered | 121 VC_252_0 | 121 | 0.7376 | 1          | 0.7376 | 0 | 0 | 0 | 0.9999 Ref |
| MF580761 | Unassigned | Unassigned | Unassigned | 252_0  | Clustered | 121 VC_252_0 | 121 | 0.7376 | 1          | 0.7376 | 0 | 0 | 0 | 0.9999 Ref |
| MF580762 | Unassigned | Unassigned | Unassigned | 252_0  | Clustered | 121 VC_252_0 | 121 | 0.7376 | 1          | 0.7376 | 0 | 0 | 0 | 0.9999 Ref |
| MF580763 | Unassigned | Unassigned | Unassigned | 252_0  | Clustered | 121 VC_252_0 | 121 | 0.7376 | 1          | 0.7376 | 0 | 0 | 0 | 0.9999 Ref |
| MF580764 | Unassigned | Unassigned | Unassigned | 252_0  | Clustered | 121 VC_252_0 | 121 | 0.7376 | 1          | 0.7376 | 0 | 0 | 0 | 0.9999 Ref |
| MF580765 | Unassigned | Unassigned | Unassigned | 252_0  | Clustered | 121 VC_252_0 | 121 | 0.7376 | 1          | 0.7376 | 0 | 0 | 0 | 0.9999 Ref |
| MF580766 | Unassigned | Unassigned | Unassigned | 252_0  | Clustered | 121 VC_252_0 | 121 | 0.7376 | 1          | 0.7376 | 0 | 0 | 0 | 0.9999 Ref |
| MF580767 | Unassigned | Unassigned | Unassigned | 252_0  | Clustered | 121 VC_252_0 | 121 | 0.7376 | 1          | 0.7376 | 0 | 0 | 0 | 0.9999 Ref |
| MF580768 | Unassigned | Unassigned | Unassigned | 252_0  | Clustered | 121 VC_252_0 | 121 | 0.7376 | 1          | 0.7376 | 0 | 0 | 0 | 0.9999 Ref |
| MF580769 | Unassigned | Unassigned | Unassigned | 252_0  | Clustered | 121 VC_252_0 | 121 | 0.7376 | 1          | 0.7376 | 0 | 0 | 0 | 0.9999 Ref |
| MF580770 | Unassigned | Unassigned | Unassigned | 252_0  | Clustered | 121 VC_252_0 | 121 | 0.7376 | 1          | 0.7376 | 0 | 0 | 0 | 0.9999 Ref |
| MF580771 | Unassigned | Unassigned | Unassigned | 252_0  | Clustered | 121 VC_252_0 | 121 | 0.7376 | 1          | 0.7376 | 0 | 0 | 0 | 0.9999 Ref |
| MF580772 | Unassigned | Unassigned | Unassigned | 252_0  | Clustered | 121 VC_252_0 | 121 | 0.7376 | 1          | 0.7376 | 0 | 0 | 0 | 0.9999 Ref |
| MF580773 | Unassigned | Unassigned | Unassigned | 252_0  | Clustered | 121 VC_252_0 | 121 | 0.7376 | 1          | 0.7376 | 0 | 0 | 0 | 0.9999 Ref |
| MF580774 | Unassigned | Unassigned | Unassigned | 252_0  | Clustered | 121 VC_252_0 | 121 | 0.7376 | 1          | 0.7376 | 0 | 0 | 0 | 0.9999 Ref |
| MF580775 | Unassigned | Unassigned | Unassigned | 252_0  | Clustered | 121 VC_252_0 | 121 | 0.7376 | 1          | 0.7376 | 0 | 0 | 0 | 0.9999 Ref |
| MF580955 | Unassigned | Unassigned | Unassigned | 1215_0 | Clustered | 3 VC_1215_0  | 3   | 1      | 1          | 1      | 0 | 0 | 0 | 1 Ref      |
| MF580956 | Unassigned | Unassigned | Unassigned | 1216_0 | Clustered | 3 VC_1216_0  | 3   | 0.8134 | 0.99225442 | 0.8071 | 0 | 0 | 0 | 1 Ref      |
| MF580957 | Unassigned | Unassigned | Unassigned | 1215_0 | Clustered | 3 VC_1215_0  | 3   | 1      | 1          | 1      | 0 | 0 | 0 | 1 Ref      |
| MF580958 | Unassigned | Unassigned | Unassigned | 1215_0 | Clustered | 3 VC_1215_0  | 3   | 1      | 1          | 1      | 0 | 0 | 0 | 1 Ref      |
| MF580959 | Unassigned | Unassigned | Unassigned | 1216_0 | Clustered | 3 VC_1216_0  | 3   | 0.8134 | 0.99225442 | 0.8071 | 0 | 0 | 0 | 1 Ref      |
| MF580960 | Unassigned | Unassigned | Unassigned | 1216_0 | Clustered | 3 VC_1216_0  | 3   | 0.8134 | 0.99225442 | 0.8071 | 0 | 0 | 0 | 1 Ref      |
| MF580961 | Unassigned | Unassigned | Unassigned | 1217_0 | Clustered | 3 VC_1217_0  | 3   | 0.7992 | 0.99216275 | 0.793  | 0 | 0 | 0 | 1 Ref      |
| MF580962 | Unassigned | Unassigned | Unassigned | 1217_0 | Clustered | 3 VC_1217_0  | 3   | 0.7992 | 0.99216275 | 0.793  | 0 | 0 | 0 | 1 Ref      |



|          |            |            |            |        |                     |              |     |        |            |        |   |   |   |            |
|----------|------------|------------|------------|--------|---------------------|--------------|-----|--------|------------|--------|---|---|---|------------|
| MF595878 | Unassigned | Unassigned | Unassigned | 734_0  | Clustered           | 6 VC_734_0   | 6   | 0.1914 | 0.99996888 | 0.1914 | 0 | 0 | 0 | 1 Ref      |
| MF612071 | Unassigned | Unassigned | Unassigned | 111_0  | Clustered           | 91 VC_111_0  | 91  | 0.9587 | 1          | 0.9587 | 0 | 0 | 0 | 1 Ref      |
| MF612072 | Unassigned | Unassigned | Unassigned | 938_0  | Clustered           | 99 VC_938_0  | 99  | 0.9119 | 1          | 0.9119 | 0 | 0 | 0 | 0.9928 Ref |
| MF612073 | Unassigned | Unassigned | Unassigned | 359_0  | Clustered           | 7 VC_359_0   | 7   | 0.3703 | 1          | 0.3703 | 0 | 0 | 0 | 1 Ref      |
| MF614100 | Unassigned | Unassigned | Unassigned | 705_0  | Clustered           | 11 VC_705_0  | 11  | 0.8861 | 1          | 0.8861 | 0 | 0 | 0 | 1 Ref      |
| MF614627 | Unassigned | Unassigned | Unassigned | 21_0   | Clustered           | 4 VC_21_0    | 4   | 0.5696 | 0.87262442 | 0.4971 | 0 | 0 | 0 | 0.6667 Ref |
| MF614628 | Unassigned | Unassigned | Unassigned | 21_0   | Clustered           | 4 VC_21_0    | 4   | 0.5696 | 0.87262442 | 0.4971 | 0 | 0 | 0 | 0.6667 Ref |
| MF621978 | Unassigned | Unassigned | Unassigned | 70_0   | Clustered           | 27 VC_70_0   | 27  | 0.5981 | 1          | 0.5981 | 0 | 0 | 0 | 0.9886 Ref |
| MF623055 | Unassigned | Unassigned | Unassigned | 79_4   | Clustered           | 3 VC_79_4    | 3   | 0.0106 | 0.99632092 | 0.0105 | 0 | 0 | 0 | 0.6667 Ref |
| MF629150 | Unassigned | Unassigned | Unassigned | 1217_0 | Clustered           | 3 VC_1217_0  | 3   | 0.7992 | 0.99216275 | 0.793  | 0 | 0 | 0 | 1 Ref      |
| MF630921 | Unassigned | Unassigned | Unassigned | 451_0  | Clustered           | 80 VC_451_0  | 80  | 0.9991 | 1          | 0.9991 | 0 | 0 | 0 | 1 Ref      |
| MF663761 | Unassigned | Unassigned | Unassigned | 123_0  | Clustered           | 23 VC_123_0  | 23  | 0.817  | 1          | 0.817  | 0 | 0 | 0 | 1 Ref      |
| MF663786 | Unassigned | Unassigned | Unassigned | 127_0  | Clustered/Singleton | 1 VC_127_0   | 1   | 0      | 1          | 0      | 0 | 0 | 0 | 1 Ref      |
| MF668266 | Unassigned | Unassigned | Unassigned | 1167_0 | Clustered           | 6 VC_1167_0  | 6   | 0.8642 | 0.99999946 | 0.8642 | 0 | 0 | 0 | 1 Ref      |
| MF668267 | Unassigned | Unassigned | Unassigned | 236_0  | Clustered           | 72 VC_236_0  | 72  | 0.8104 | 1          | 0.8104 | 0 | 0 | 0 | 1 Ref      |
| MF668268 | Unassigned | Unassigned | Unassigned | 761_0  | Clustered           | 67 VC_761_0  | 67  | 0.8947 | 1          | 0.8947 | 0 | 0 | 0 | 1 Ref      |
| MF668269 | Unassigned | Unassigned | Unassigned | 216_4  | Clustered           | 13 VC_216_4  | 13  | 0.1657 | 1          | 0.1657 | 0 | 0 | 0 | 1 Ref      |
| MF668270 | Unassigned | Unassigned | Unassigned | 520_15 | Clustered           | 2 VC_520_15  | 2   | 0.0078 | 0.957604   | 0.0075 | 0 | 0 | 0 | 0 Ref      |
| MF668272 | Unassigned | Unassigned | Unassigned | 761_0  | Clustered           | 67 VC_761_0  | 67  | 0.8947 | 1          | 0.8947 | 0 | 0 | 0 | 1 Ref      |
| MF668273 | Unassigned | Unassigned | Unassigned | 1167_0 | Clustered           | 6 VC_1167_0  | 6   | 0.8642 | 0.99999946 | 0.8642 | 0 | 0 | 0 | 1 Ref      |
| MF668274 | Unassigned | Unassigned | Unassigned | 1074_0 | Clustered           | 19 VC_1074_0 | 19  | 0.9198 | 1          | 0.9198 | 0 | 0 | 0 | 1 Ref      |
| MF668275 | Unassigned | Unassigned | Unassigned | 1159_0 | Clustered           | 3 VC_1159_0  | 3   | 0.3304 | 0.98548359 | 0.3256 | 0 | 0 | 0 | 1 Ref      |
| MF668276 | Unassigned | Unassigned | Unassigned | 371_11 | Clustered           | 31 VC_371_11 | 31  | 0.0927 | 1          | 0.0927 | 0 | 0 | 0 | 0.7011 Ref |
| MF668277 | Unassigned | Unassigned | Unassigned | 551_7  | Clustered           | 28 VC_551_7  | 28  | 0.1661 | 1          | 0.1661 | 0 | 0 | 0 | 0.8519 Ref |
| MF668278 | Unassigned | Unassigned | Unassigned | 517_0  | Clustered           | 18 VC_517_0  | 18  | 0.1599 | 1          | 0.1599 | 0 | 0 | 0 | 1 Ref      |
| MF668279 | Unassigned | Unassigned | Unassigned | 1167_0 | Clustered           | 6 VC_1167_0  | 6   | 0.8642 | 0.99999946 | 0.8642 | 0 | 0 | 0 | 1 Ref      |
| MF668280 | Unassigned | Unassigned | Unassigned | 559_0  | Clustered           | 2 VC_559_0   | 2   | 0.0112 | 0.95651281 | 0.0107 | 0 | 0 | 0 | 1 Ref      |
| MF668282 | Unassigned | Unassigned | Unassigned | 224_0  | Clustered           | 19 VC_224_0  | 19  | 0.9416 | 1          | 0.9416 | 0 | 0 | 0 | 1 Ref      |
| MF668283 | Unassigned | Unassigned | Unassigned | 325_35 | Clustered           | 17 VC_325_35 | 17  | 0.0732 | 1          | 0.0732 | 0 | 0 | 0 | 0.7721 Ref |
| MF668284 | Unassigned | Unassigned | Unassigned | 546_3  | Clustered           | 4 VC_546_3   | 4   | 0.0418 | 0.92194988 | 0.0385 | 0 | 0 | 0 | 1 Ref      |
| MF668285 | Unassigned | Unassigned | Unassigned | 1160_0 | Clustered           | 73 VC_1160_0 | 73  | 0.9835 | 1          | 0.9835 | 0 | 0 | 0 | 1 Ref      |
| MF668287 | Unassigned | Unassigned | Unassigned | 520_3  | Clustered/Singleton | 1 VC_520_3   | 1   | 0      | 1          | 0      | 0 | 0 | 0 | 1 Ref      |
| MF668288 | Unassigned | Unassigned | Unassigned | 223_0  | Clustered           | 38 VC_223_0  | 38  | 0.9095 | 1          | 0.9095 | 0 | 0 | 0 | 1 Ref      |
| MF678788 | Unassigned | Unassigned | Unassigned | 695_0  | Clustered           | 48 VC_695_0  | 48  | 0.8162 | 1          | 0.8162 | 0 | 0 | 0 | 1 Ref      |
| MF678789 | Unassigned | Unassigned | Unassigned | 695_0  | Clustered           | 48 VC_695_0  | 48  | 0.8162 | 1          | 0.8162 | 0 | 0 | 0 | 1 Ref      |
| MF678790 | Unassigned | Unassigned | Unassigned | 695_0  | Clustered           | 48 VC_695_0  | 48  | 0.8162 | 1          | 0.8162 | 0 | 0 | 0 | 1 Ref      |
| MF681663 | Unassigned | Unassigned | Unassigned | 191_11 | Clustered/Singleton | 1 VC_191_11  | 1   | 0      | 1          | 0      | 0 | 0 | 0 | 1 Ref      |
| MF683623 | Unassigned | Unassigned | Unassigned | 878_0  | Clustered           | 32 VC_878_0  | 32  | 0.9965 | 1          | 0.9965 | 0 | 0 | 0 | 1 Ref      |
| MF695815 | Unassigned | Unassigned | Unassigned | 243_0  | Clustered           | 2 VC_243_0   | 2   | 0.0637 | 0.95609892 | 0.0609 | 0 | 0 | 0 | 1 Ref      |
| MF716957 | Unassigned | Unassigned | Unassigned | 52_0   | Clustered           | 87 VC_52_0   | 87  | 0.9858 | 1          | 0.9858 | 0 | 0 | 0 | 1 Ref      |
| MF740800 | Unassigned | Unassigned | Unassigned | 428_0  | Clustered           | 33 VC_428_0  | 33  | 0.9915 | 1          | 0.9915 | 0 | 0 | 0 | 1 Ref      |
| MF754111 | Unassigned | Unassigned | Unassigned | 837_0  | Clustered           | 29 VC_837_0  | 29  | 0.9955 | 1          | 0.9955 | 0 | 0 | 0 | 1 Ref      |
| MF754112 | Unassigned | Unassigned | Unassigned | 837_0  | Clustered           | 29 VC_837_0  | 29  | 0.9955 | 1          | 0.9955 | 0 | 0 | 0 | 1 Ref      |
| MF754113 | Unassigned | Unassigned | Unassigned | 882_0  | Clustered           | 20 VC_882_0  | 20  | 0.9917 | 1          | 0.9917 | 0 | 0 | 0 | 1 Ref      |
| MF754114 | Unassigned | Unassigned | Unassigned | 882_0  | Clustered           | 20 VC_882_0  | 20  | 0.9917 | 1          | 0.9917 | 0 | 0 | 0 | 1 Ref      |
| MF754115 | Unassigned | Unassigned | Unassigned | 882_0  | Clustered           | 20 VC_882_0  | 20  | 0.9917 | 1          | 0.9917 | 0 | 0 | 0 | 1 Ref      |
| MF754116 | Unassigned | Unassigned | Unassigned | 882_0  | Clustered           | 20 VC_882_0  | 20  | 0.9917 | 1          | 0.9917 | 0 | 0 | 0 | 1 Ref      |
| MF765814 | Unassigned | Unassigned | Unassigned | 883_1  | Clustered           | 12 VC_883_1  | 12  | 0.2441 | 1          | 0.2441 | 0 | 0 | 0 | 1 Ref      |
| MF766044 | Unassigned | Unassigned | Unassigned | 981_1  | Clustered           | 26 VC_981_1  | 26  | 0.7009 | 1          | 0.7009 | 0 | 0 | 0 | 1 Ref      |
| MF766045 | Unassigned | Unassigned | Unassigned | 981_1  | Clustered           | 26 VC_981_1  | 26  | 0.7009 | 1          | 0.7009 | 0 | 0 | 0 | 1 Ref      |
| MF766046 | Unassigned | Unassigned | Unassigned | 981_1  | Clustered           | 26 VC_981_1  | 26  | 0.7009 | 1          | 0.7009 | 0 | 0 | 0 | 1 Ref      |
| MF766047 | Unassigned | Unassigned | Unassigned | 981_1  | Clustered           | 26 VC_981_1  | 26  | 0.7009 | 1          | 0.7009 | 0 | 0 | 0 | 1 Ref      |
| MF766048 | Unassigned | Unassigned | Unassigned | 981_1  | Clustered           | 26 VC_981_1  | 26  | 0.7009 | 1          | 0.7009 | 0 | 0 | 0 | 1 Ref      |
| MF768469 | Unassigned | Unassigned | Unassigned | 472_0  | Clustered           | 47 VC_472_0  | 47  | 0.9025 | 1          | 0.9025 | 0 | 0 | 0 | 1 Ref      |
| MF768470 | Unassigned | Unassigned | Unassigned | 79_7   | Clustered           | 33 VC_79_7   | 33  | 0.216  | 1          | 0.216  | 0 | 0 | 0 | 0.8409 Ref |
| MF773750 | Unassigned | Unassigned | Unassigned | 515_0  | Clustered           | 16 VC_515_0  | 16  | 0.3793 | 1          | 0.3793 | 0 | 0 | 0 | 1 Ref      |
| MF774688 | Unassigned | Unassigned | Unassigned | 190_30 | Clustered/Singleton | 1 VC_190_30  | 1   | 0      | 1          | 0      | 0 | 0 | 0 | 1 Ref      |
| MF775703 | Unassigned | Unassigned | Unassigned | 202_0  | Clustered           | 102 VC_202_0 | 102 | 0.4049 | 1          | 0.4049 | 0 | 0 | 0 | 0.7876 Ref |
| MF775704 | Unassigned | Unassigned | Unassigned | 202_0  | Clustered           | 102 VC_202_0 | 102 | 0.4049 | 1          | 0.4049 | 0 | 0 | 0 | 0.7876 Ref |
| MF775705 | Unassigned | Unassigned | Unassigned | 202_0  | Clustered           | 102 VC_202_0 | 102 | 0.4049 | 1          | 0.4049 | 0 | 0 | 0 | 0.7876 Ref |
| MF787246 | Unassigned | Unassigned | Unassigned | 526_1  | Clustered/Singleton | 1 VC_526_1   | 1   | 0      | 1          | 0      | 0 | 0 | 0 | 1 Ref      |
| MF788075 | Unassigned | Unassigned | Unassigned | 755_0  | Clustered           | 9 VC_755_0   | 9   | 0.4489 | 1          | 0.4489 | 0 | 0 | 0 | 1 Ref      |
| MF805716 | Unassigned | Unassigned | Unassigned | 344_0  | Clustered           | 21 VC_344_0  | 21  | 0.5436 | 1          | 0.5436 | 0 | 0 | 0 | 1 Ref      |
| MF805809 | Unassigned | Unassigned | Unassigned | 848_0  | Clustered           | 28 VC_848_0  | 28  | 0.7927 | 1          | 0.7927 | 0 | 0 | 0 | 1 Ref      |
| MF807953 | Unassigned | Unassigned | Unassigned | 51_0   | Clustered           | 10 VC_51_0   | 10  | 0.1741 | 1          | 0.1741 | 0 | 0 | 0 | 1 Ref      |
| MF893340 | Unassigned | Unassigned | Unassigned | 78_6   | Clustered/Singleton | 1 VC_78_6    | 1   | 0      | 1          | 0      | 0 | 0 | 0 | 1 Ref      |
| MF919490 | Unassigned | Unassigned | Unassigned | 216_6  | Clustered           | 42 VC_216_6  | 42  | 0.473  | 1          | 0.473  | 0 | 0 | 0 | 0.8351 Ref |
| MF919491 | Unassigned | Unassigned | Unassigned | 765_0  | Clustered           | 132 VC_765_0 | 132 | 1      | 1          | 1      | 0 | 0 | 0 | 1 Ref      |
| MF919492 | Unassigned | Unassigned | Unassigned | 519_0  | Clustered           | 39 VC_519_0  | 39  | 0.8156 | 1          | 0.8156 | 0 | 0 | 0 | 1 Ref      |
| MF919493 | Unassigned | Unassigned | Unassigned | 558_20 | Clustered           | 17 VC_558_20 | 17  | 0.054  | 1          | 0.054  | 0 | 0 | 0 | 0.9926 Ref |
| MF919494 | Unassigned | Unassigned | Unassigned | 558_55 | Clustered/Singleton | 1 VC_558_55  | 1   | 0      | 1          | 0      | 0 | 0 | 0 | 1 Ref      |
| MF919495 | Unassigned | Unassigned | Unassigned | 558_74 | Clustered/Singleton | 1 VC_558_74  | 1   | 0      | 1          | 0      | 0 | 0 | 0 | 1 Ref      |
| MF919496 | Unassigned | Unassigned | Unassigned | 517_1  | Clustered           | 108 VC_517_1 | 108 | 0.8483 | 1          | 0.8483 | 0 | 0 | 0 | 0.9955 Ref |
| MF919497 | Unassigned | Unassigned | Unassigned | 761_0  | Clustered           | 67 VC_761_0  | 67  | 0.8947 | 1          | 0.8947 | 0 | 0 | 0 | 1 Ref      |
| MF919499 | Unassigned | Unassigned | Unassigned | 558_50 | Clustered           | 15 VC_558_50 | 15  | 0.0468 | 1          | 0.0468 | 0 | 0 | 0 | 0.9238 Ref |
| MF919500 | Unassigned | Unassigned | Unassigned | 216_6  | Clustered           | 42 VC_216_6  | 42  | 0.473  | 1          | 0.473  | 0 | 0 | 0 | 0.8351 Ref |
| MF919501 | Unassigned | Unassigned | Unassigned | 520_63 | Clustered/Singleton | 1 VC_520_63  | 1   | 0      | 1          | 0      | 0 | 0 | 0 | 1 Ref      |
| MF919503 | Unassigned | Unassigned | Unassigned | 371_3  | Clustered           | 22 VC_371_3  | 22  | 0.0787 | 1          | 0.0787 | 0 | 0 | 0 | 0.9048 Ref |
| MF919504 | Unassigned | Unassigned | Unassigned | 546_5  | Clustered/Singleton | 1 VC_546_5   | 1   | 0      | 1          | 0      | 0 | 0 | 0 | 1 Ref      |
| MF919505 | Unassigned | Unassigned | Unassigned | 765_0  | Clustered           | 132 VC_765_0 | 132 | 1      | 1          | 1      | 0 | 0 | 0 | 1 Ref      |
| MF919506 | Unassigned | Unassigned | Unassigned | 551_8  | Clustered           | 19 VC_551_8  | 19  | 0.1039 | 1          | 0.1039 | 0 | 0 | 0 | 0.8713 Ref |



|          |            |            |            |        |                     |               |     |        |            |        |   |   |   |        |     |
|----------|------------|------------|------------|--------|---------------------|---------------|-----|--------|------------|--------|---|---|---|--------|-----|
| MF919507 | Unassigned | Unassigned | Unassigned | 371_3  | Clustered           | 22 VC_371_3   | 22  | 0.0787 | 1          | 0.0787 | 0 | 0 | 0 | 0.9048 | Ref |
| MF919508 | Unassigned | Unassigned | Unassigned | 325_56 | Clustered           | 2 VC_325_56   | 2   | 0.0036 | 0.94604798 | 0.0034 | 0 | 0 | 0 | 0      | Ref |
| MF919509 | Unassigned | Unassigned | Unassigned | 517_1  | Clustered           | 108 VC_517_1  | 108 | 0.8483 | 1          | 0.8483 | 0 | 0 | 0 | 0.9955 | Ref |
| MF919510 | Unassigned | Unassigned | Unassigned | 767_0  | Clustered           | 34 VC_767_0   | 34  | 0.9173 | 1          | 0.9173 | 0 | 0 | 0 | 1      | Ref |
| MF919511 | Unassigned | Unassigned | Unassigned | 371_13 | Clustered           | 33 VC_371_13  | 33  | 0.179  | 1          | 0.179  | 0 | 0 | 0 | 0.8769 | Ref |
| MF919512 | Unassigned | Unassigned | Unassigned | 546_6  | Clustered           | 2 VC_546_6    | 2   | 0.0135 | 0.7810929  | 0.0105 | 0 | 0 | 0 | 1      | Ref |
| MF919513 | Unassigned | Unassigned | Unassigned | 558_77 | Clustered           | 3 VC_558_77   | 3   | 0.0065 | 0.90877939 | 0.0059 | 0 | 0 | 0 | 0.6667 | Ref |
| MF919514 | Unassigned | Unassigned | Unassigned | 1093_0 | Clustered           | 40 VC_1093_0  | 40  | 0.8754 | 1          | 0.8754 | 0 | 0 | 0 | 1      | Ref |
| MF919515 | Unassigned | Unassigned | Unassigned | 765_0  | Clustered           | 132 VC_765_0  | 132 | 1      | 1          | 1      | 0 | 0 | 0 | 1      | Ref |
| MF919516 | Unassigned | Unassigned | Unassigned | 765_0  | Clustered           | 132 VC_765_0  | 132 | 1      | 1          | 1      | 0 | 0 | 0 | 1      | Ref |
| MF919517 | Unassigned | Unassigned | Unassigned | 810_0  | Clustered           | 18 VC_810_0   | 18  | 0.9121 | 1          | 0.9121 | 0 | 0 | 0 | 1      | Ref |
| MF919519 | Unassigned | Unassigned | Unassigned | 371_6  | Clustered/Singleton | 1 VC_371_6    | 1   | 0      | 1          | 0      | 0 | 0 | 0 | 1      | Ref |
| MF919520 | Unassigned | Unassigned | Unassigned | 1181_1 | Clustered           | 10 VC_1181_1  | 10  | 0.5828 | 1          | 0.5828 | 0 | 0 | 0 | 1      | Ref |
| MF919521 | Unassigned | Unassigned | Unassigned | 1176_0 | Clustered           | 41 VC_1176_0  | 41  | 0.9558 | 1          | 0.9558 | 0 | 0 | 0 | 0.9976 | Ref |
| MF919522 | Unassigned | Unassigned | Unassigned | 765_0  | Clustered           | 132 VC_765_0  | 132 | 1      | 1          | 1      | 0 | 0 | 0 | 1      | Ref |
| MF919523 | Unassigned | Unassigned | Unassigned | 371_3  | Clustered           | 22 VC_371_3   | 22  | 0.0787 | 1          | 0.0787 | 0 | 0 | 0 | 0.9048 | Ref |
| MF919524 | Unassigned | Unassigned | Unassigned | 551_8  | Clustered           | 19 VC_551_8   | 19  | 0.1039 | 1          | 0.1039 | 0 | 0 | 0 | 0.8713 | Ref |
| MF919525 | Unassigned | Unassigned | Unassigned | 551_8  | Clustered           | 19 VC_551_8   | 19  | 0.1039 | 1          | 0.1039 | 0 | 0 | 0 | 0.8713 | Ref |
| MF919526 | Unassigned | Unassigned | Unassigned | 520_81 | Clustered/Singleton | 1 VC_520_81   | 1   | 0      | 1          | 0      | 0 | 0 | 0 | 1      | Ref |
| MF919527 | Unassigned | Unassigned | Unassigned | 558_82 | Clustered           | 3 VC_558_82   | 3   | 0.0064 | 0.88433874 | 0.0057 | 0 | 0 | 0 | 0.6667 | Ref |
| MF919528 | Unassigned | Unassigned | Unassigned | 371_11 | Clustered           | 31 VC_371_11  | 31  | 0.0927 | 1          | 0.0927 | 0 | 0 | 0 | 0.7011 | Ref |
| MF919529 | Unassigned | Unassigned | Unassigned | 551_8  | Clustered           | 19 VC_551_8   | 19  | 0.1039 | 1          | 0.1039 | 0 | 0 | 0 | 0.8713 | Ref |
| MF919530 | Unassigned | Unassigned | Unassigned | 371_3  | Clustered           | 22 VC_371_3   | 22  | 0.0787 | 1          | 0.0787 | 0 | 0 | 0 | 0.9048 | Ref |
| MF919531 | Unassigned | Unassigned | Unassigned | 216_6  | Clustered           | 42 VC_216_6   | 42  | 0.473  | 1          | 0.473  | 0 | 0 | 0 | 0.8351 | Ref |
| MF919532 | Unassigned | Unassigned | Unassigned | 236_0  | Clustered           | 72 VC_236_0   | 72  | 0.8104 | 1          | 0.8104 | 0 | 0 | 0 | 1      | Ref |
| MF919533 | Unassigned | Unassigned | Unassigned | 765_0  | Clustered           | 132 VC_765_0  | 132 | 1      | 1          | 1      | 0 | 0 | 0 | 1      | Ref |
| MF919534 | Unassigned | Unassigned | Unassigned | 546_2  | Clustered           | 3 VC_546_2    | 3   | 0.0275 | 0.85260342 | 0.0234 | 0 | 0 | 0 | 1      | Ref |
| MF919535 | Unassigned | Unassigned | Unassigned | 551_8  | Clustered           | 19 VC_551_8   | 19  | 0.1039 | 1          | 0.1039 | 0 | 0 | 0 | 0.8713 | Ref |
| MF919536 | Unassigned | Unassigned | Unassigned | 215_2  | Clustered           | 5 VC_215_2    | 5   | 0.0572 | 0.99999997 | 0.0572 | 0 | 0 | 0 | 1      | Ref |
| MF919537 | Unassigned | Unassigned | Unassigned | 1181_1 | Clustered           | 10 VC_1181_1  | 10  | 0.5828 | 1          | 0.5828 | 0 | 0 | 0 | 1      | Ref |
| MF919538 | Unassigned | Unassigned | Unassigned | 216_4  | Clustered           | 13 VC_216_4   | 13  | 0.1657 | 1          | 0.1657 | 0 | 0 | 0 | 1      | Ref |
| MF919539 | Unassigned | Unassigned | Unassigned | 371_11 | Clustered           | 31 VC_371_11  | 31  | 0.0927 | 1          | 0.0927 | 0 | 0 | 0 | 0.7011 | Ref |
| MF919540 | Unassigned | Unassigned | Unassigned | 551_8  | Clustered           | 19 VC_551_8   | 19  | 0.1039 | 1          | 0.1039 | 0 | 0 | 0 | 0.8713 | Ref |
| MF919541 | Unassigned | Unassigned | Unassigned | 551_1  | Clustered           | 4 VC_551_1    | 4   | 0.0159 | 0.99968337 | 0.0159 | 0 | 0 | 0 | 0.6667 | Ref |
| MF919542 | Unassigned | Unassigned | Unassigned | 767_0  | Clustered           | 34 VC_767_0   | 34  | 0.9173 | 1          | 0.9173 | 0 | 0 | 0 | 1      | Ref |
| MF950999 | Unassigned | Unassigned | Unassigned | 185_0  | Clustered           | 3 VC_185_0    | 3   | 0.4487 | 0.97148006 | 0.4359 | 0 | 0 | 0 | 1      | Ref |
| MF974178 | Unassigned | Unassigned | Unassigned | 76_0   | Clustered           | 37 VC_76_0    | 37  | 0.9403 | 1          | 0.9403 | 0 | 0 | 0 | 1      | Ref |
| MF974396 | Unassigned | Unassigned | Unassigned | 688_0  | Clustered           | 2 VC_688_0    | 2   | 0.9946 | 0.5        | 0.4973 | 0 | 0 | 0 | 1      | Ref |
| MF974397 | Unassigned | Unassigned | Unassigned | 688_0  | Clustered           | 2 VC_688_0    | 2   | 0.9946 | 0.5        | 0.4973 | 0 | 0 | 0 | 1      | Ref |
| MF975638 | Unassigned | Unassigned | Unassigned | 975_0  | Clustered           | 11 VC_975_0   | 11  | 0.9687 | 1          | 0.9687 | 0 | 0 | 0 | 1      | Ref |
| MF975720 | Unassigned | Unassigned | Unassigned | 241_0  | Clustered           | 2 VC_241_0    | 2   | 0.072  | 0.95433582 | 0.0687 | 0 | 0 | 0 | 1      | Ref |
| MF979560 | Unassigned | Unassigned | Unassigned | 849_3  | Clustered           | 2 VC_849_3    | 2   | 0.0243 | 0.85188229 | 0.0207 | 0 | 0 | 0 | 1      | Ref |
| MF979561 | Unassigned | Unassigned | Unassigned | 389_0  | Clustered           | 3 VC_389_0    | 3   | 0.0515 | 0.99861557 | 0.0514 | 0 | 0 | 0 | 1      | Ref |
| MF979562 | Unassigned | Unassigned | Unassigned | 1218_0 | Clustered           | 4 VC_1218_0   | 4   | 0.8905 | 0.99530591 | 0.8863 | 0 | 0 | 0 | 1      | Ref |
| MF979563 | Unassigned | Unassigned | Unassigned | 849_3  | Clustered           | 2 VC_849_3    | 2   | 0.0243 | 0.85188229 | 0.0207 | 0 | 0 | 0 | 1      | Ref |
| MF996376 | Unassigned | Unassigned | Unassigned | 576_0  | Clustered           | 4 VC_576_0    | 4   | 0.0606 | 0.99998766 | 0.0606 | 0 | 0 | 0 | 1      | Ref |
| MF999224 | Unassigned | Unassigned | Unassigned | 272_0  | Clustered           | 11 VC_272_0   | 11  | 0.4915 | 1          | 0.4915 | 0 | 0 | 0 | 0.8727 | Ref |
| MG000860 | Unassigned | Unassigned | Unassigned | 85_3   | Clustered           | 19 VC_85_3    | 19  | 0.3671 | 1          | 0.3671 | 0 | 0 | 0 | 0.807  | Ref |
| MG004687 | Unassigned | Unassigned | Unassigned | 452_0  | Clustered           | 66 VC_452_0   | 66  | 0.9248 | 1          | 0.9248 | 0 | 0 | 0 | 1      | Ref |
| MG018224 | Unassigned | Unassigned | Unassigned | 169_0  | Clustered           | 20 VC_169_0   | 20  | 0.7529 | 1          | 0.7529 | 0 | 0 | 0 | 1      | Ref |
| MG018927 | Unassigned | Unassigned | Unassigned | 725_0  | Clustered           | 4 VC_725_0    | 4   | 0.4268 | 0.99997355 | 0.4268 | 0 | 0 | 0 | 1      | Ref |
| MG018928 | Unassigned | Unassigned | Unassigned | 779_1  | Clustered           | 11 VC_779_1   | 11  | 0.1587 | 1          | 0.1587 | 0 | 0 | 0 | 1      | Ref |
| MG018929 | Unassigned | Unassigned | Unassigned | 1027_0 | Clustered           | 20 VC_1027_0  | 20  | 0.7114 | 1          | 0.7114 | 0 | 0 | 0 | 1      | Ref |
| MG018930 | Unassigned | Unassigned | Unassigned | 78_0   | Clustered           | 2 VC_78_0     | 2   | 0.0306 | 0.95617387 | 0.0293 | 0 | 0 | 0 | 1      | Ref |
| MG020111 | Unassigned | Unassigned | Unassigned | 578_0  | Clustered           | 2 VC_578_0    | 2   | 0.1712 | 0.93973606 | 0.1608 | 0 | 0 | 0 | 1      | Ref |
| MG022439 | Unassigned | Unassigned | Unassigned | 772_9  | Clustered           | 7 VC_772_9    | 7   | 0.0369 | 0.87705503 | 0.0324 | 0 | 0 | 0 | 1      | Ref |
| MG022440 | Unassigned | Unassigned | Unassigned | 772_9  | Clustered           | 7 VC_772_9    | 7   | 0.0369 | 0.87705503 | 0.0324 | 0 | 0 | 0 | 1      | Ref |
| MG025518 | Unassigned | Unassigned | Unassigned | 1104_0 | Clustered           | 154 VC_1104_0 | 154 | 0.8484 | 1          | 0.8484 | 0 | 0 | 0 | 1      | Ref |
| MG029509 | Unassigned | Unassigned | Unassigned | 8_0    | Clustered           | 58 VC_8_0     | 58  | 0.8306 | 1          | 0.8306 | 0 | 0 | 0 | 0.9946 | Ref |
| MG029510 | Unassigned | Unassigned | Unassigned | 10_0   | Clustered           | 25 VC_10_0    | 25  | 0.3467 | 1          | 0.3467 | 0 | 0 | 0 | 0.9733 | Ref |
| MG029511 | Unassigned | Unassigned | Unassigned | 8_0    | Clustered           | 58 VC_8_0     | 58  | 0.8306 | 1          | 0.8306 | 0 | 0 | 0 | 0.9946 | Ref |
| MG029512 | Unassigned | Unassigned | Unassigned | 10_0   | Clustered           | 25 VC_10_0    | 25  | 0.3467 | 1          | 0.3467 | 0 | 0 | 0 | 0.9733 | Ref |
| MG029513 | Unassigned | Unassigned | Unassigned | 8_0    | Clustered           | 58 VC_8_0     | 58  | 0.8306 | 1          | 0.8306 | 0 | 0 | 0 | 0.9946 | Ref |
| MG029514 | Unassigned | Unassigned | Unassigned | 8_0    | Clustered           | 58 VC_8_0     | 58  | 0.8306 | 1          | 0.8306 | 0 | 0 | 0 | 0.9946 | Ref |
| MG029515 | Unassigned | Unassigned | Unassigned | 8_0    | Clustered           | 58 VC_8_0     | 58  | 0.8306 | 1          | 0.8306 | 0 | 0 | 0 | 0.9946 | Ref |
| MG029516 | Unassigned | Unassigned | Unassigned | 8_0    | Clustered           | 58 VC_8_0     | 58  | 0.8306 | 1          | 0.8306 | 0 | 0 | 0 | 0.9946 | Ref |
| MG029517 | Unassigned | Unassigned | Unassigned | 8_0    | Clustered           | 58 VC_8_0     | 58  | 0.8306 | 1          | 0.8306 | 0 | 0 | 0 | 0.9946 | Ref |
| MG029518 | Unassigned | Unassigned | Unassigned | 8_0    | Clustered           | 58 VC_8_0     | 58  | 0.8306 | 1          | 0.8306 | 0 | 0 | 0 | 0.9946 | Ref |
| MG030346 | Unassigned | Unassigned | Unassigned | 591_0  | Clustered           | 14 VC_591_0   | 14  | 0.5184 | 1          | 0.5184 | 0 | 0 | 0 | 1      | Ref |
| MG049919 | Unassigned | Unassigned | Unassigned | 575_0  | Clustered           | 35 VC_575_0   | 35  | 0.8815 | 1          | 0.8815 | 0 | 0 | 0 | 1      | Ref |
| MG050172 | Unassigned | Unassigned | Unassigned | 456_0  | Clustered           | 62 VC_456_0   | 62  | 0.9026 | 1          | 0.9026 | 0 | 0 | 0 | 1      | Ref |
| MG065635 | Unassigned | Unassigned | Unassigned | 772_19 | Clustered           | 16 VC_772_19  | 16  | 0.0975 | 0.9970466  | 0.0972 | 0 | 0 | 0 | 0.8083 | Ref |
| MG065636 | Unassigned | Unassigned | Unassigned | 941_0  | Clustered           | 40 VC_941_0   | 40  | 0.6903 | 1          | 0.6903 | 0 | 0 | 0 | 1      | Ref |
| MG065639 | Unassigned | Unassigned | Unassigned | 848_0  | Clustered           | 28 VC_848_0   | 28  | 0.7927 | 1          | 0.7927 | 0 | 0 | 0 | 1      | Ref |
| MG065640 | Unassigned | Unassigned | Unassigned | 941_0  | Clustered           | 40 VC_941_0   | 40  | 0.6903 | 1          | 0.6903 | 0 | 0 | 0 | 1      | Ref |
| MG065641 | Unassigned | Unassigned | Unassigned | 941_0  | Clustered           | 40 VC_941_0   | 40  | 0.6903 | 1          | 0.6903 | 0 | 0 | 0 | 1      | Ref |
| MG065642 | Unassigned | Unassigned | Unassigned | 191_19 | Clustered           | 12 VC_191_19  | 12  | 0.0655 | 1          | 0.0655 | 0 | 0 | 0 | 0.8636 | Ref |
| MG065643 | Unassigned | Unassigned | Unassigned | 941_0  | Clustered           | 40 VC_941_0   | 40  | 0.6903 | 1          | 0.6903 | 0 | 0 | 0 | 1      | Ref |
| MG065644 | Unassigned | Unassigned | Unassigned | 772_0  | Clustered           | 6 VC_772_0    | 6   | 0.0305 | 0.8101283  | 0.0247 | 0 | 0 | 0 | 1      | Ref |
| MG065645 | Unassigned | Unassigned | Unassigned | 848_0  | Clustered           | 28 VC_848_0   | 28  | 0.7927 | 1          | 0.7927 | 0 | 0 | 0 | 1      | Ref |
| MG065646 | Unassigned | Unassigned | Unassigned | 772_16 | Clustered           | 10 VC_772_16  | 10  | 0.0563 | 0.9434928  | 0.0531 | 0 | 0 | 0 | 0.8667 | Ref |



|          |            |            |            |        |                     |              |     |        |            |        |   |   |   |        |     |
|----------|------------|------------|------------|--------|---------------------|--------------|-----|--------|------------|--------|---|---|---|--------|-----|
| MG065647 | Unassigned | Unassigned | Unassigned | 772_16 | Clustered           | 10 VC_772_16 | 10  | 0.0563 | 0.9434928  | 0.0531 | 0 | 0 | 0 | 0.8667 | Ref |
| MG065648 | Unassigned | Unassigned | Unassigned | 835_0  | Clustered           | 67 VC_835_0  | 67  | 0.9624 | 1          | 0.9624 | 0 | 0 | 0 | 1      | Ref |
| MG065649 | Unassigned | Unassigned | Unassigned | 941_0  | Clustered           | 40 VC_941_0  | 40  | 0.6903 | 1          | 0.6903 | 0 | 0 | 0 | 1      | Ref |
| MG065650 | Unassigned | Unassigned | Unassigned | 847_1  | Clustered           | 26 VC_847_1  | 26  | 0.6323 | 1          | 0.6323 | 0 | 0 | 0 | 0.9815 | Ref |
| MG065653 | Unassigned | Unassigned | Unassigned | 772_13 | Clustered/Singleton | 1 VC_772_13  | 1   | 0      | 1          | 0      | 0 | 0 | 0 | 1      | Ref |
| MG065654 | Unassigned | Unassigned | Unassigned | 772_14 | Clustered           | 3 VC_772_14  | 3   | 0.012  | 0.63979507 | 0.0077 | 0 | 0 | 0 | 1      | Ref |
| MG065655 | Unassigned | Unassigned | Unassigned | 772_14 | Clustered           | 3 VC_772_14  | 3   | 0.012  | 0.63979507 | 0.0077 | 0 | 0 | 0 | 1      | Ref |
| MG065656 | Unassigned | Unassigned | Unassigned | 848_0  | Clustered           | 28 VC_848_0  | 28  | 0.7927 | 1          | 0.7927 | 0 | 0 | 0 | 1      | Ref |
| MG065657 | Unassigned | Unassigned | Unassigned | 941_0  | Clustered           | 40 VC_941_0  | 40  | 0.6903 | 1          | 0.6903 | 0 | 0 | 0 | 1      | Ref |
| MG065658 | Unassigned | Unassigned | Unassigned | 772_16 | Clustered           | 10 VC_772_16 | 10  | 0.0563 | 0.9434928  | 0.0531 | 0 | 0 | 0 | 0.8667 | Ref |
| MG065659 | Unassigned | Unassigned | Unassigned | 772_12 | Clustered/Singleton | 1 VC_772_12  | 1   | 0      | 1          | 0      | 0 | 0 | 0 | 1      | Ref |
| MG065661 | Unassigned | Unassigned | Unassigned | 772_16 | Clustered           | 10 VC_772_16 | 10  | 0.0563 | 0.9434928  | 0.0531 | 0 | 0 | 0 | 0.8667 | Ref |
| MG065662 | Unassigned | Unassigned | Unassigned | 772_0  | Clustered           | 6 VC_772_0   | 6   | 0.0305 | 0.8101283  | 0.0247 | 0 | 0 | 0 | 1      | Ref |
| MG065663 | Unassigned | Unassigned | Unassigned | 941_0  | Clustered           | 40 VC_941_0  | 40  | 0.6903 | 1          | 0.6903 | 0 | 0 | 0 | 1      | Ref |
| MG065664 | Unassigned | Unassigned | Unassigned | 329_12 | Clustered           | 2 VC_329_12  | 2   | 0.0041 | 0.72605466 | 0.003  | 0 | 0 | 0 | 1      | Ref |
| MG065665 | Unassigned | Unassigned | Unassigned | 941_0  | Clustered           | 40 VC_941_0  | 40  | 0.6903 | 1          | 0.6903 | 0 | 0 | 0 | 1      | Ref |
| MG065666 | Unassigned | Unassigned | Unassigned | 772_14 | Clustered           | 3 VC_772_14  | 3   | 0.012  | 0.63979507 | 0.0077 | 0 | 0 | 0 | 1      | Ref |
| MG065667 | Unassigned | Unassigned | Unassigned | 941_0  | Clustered           | 40 VC_941_0  | 40  | 0.6903 | 1          | 0.6903 | 0 | 0 | 0 | 1      | Ref |
| MG065669 | Unassigned | Unassigned | Unassigned | 941_0  | Clustered           | 40 VC_941_0  | 40  | 0.6903 | 1          | 0.6903 | 0 | 0 | 0 | 1      | Ref |
| MG065670 | Unassigned | Unassigned | Unassigned | 941_0  | Clustered           | 40 VC_941_0  | 40  | 0.6903 | 1          | 0.6903 | 0 | 0 | 0 | 1      | Ref |
| MG065671 | Unassigned | Unassigned | Unassigned | 941_0  | Clustered           | 40 VC_941_0  | 40  | 0.6903 | 1          | 0.6903 | 0 | 0 | 0 | 1      | Ref |
| MG065672 | Unassigned | Unassigned | Unassigned | 772_0  | Clustered           | 6 VC_772_0   | 6   | 0.0305 | 0.8101283  | 0.0247 | 0 | 0 | 0 | 1      | Ref |
| MG065673 | Unassigned | Unassigned | Unassigned | 941_0  | Clustered           | 40 VC_941_0  | 40  | 0.6903 | 1          | 0.6903 | 0 | 0 | 0 | 1      | Ref |
| MG065674 | Unassigned | Unassigned | Unassigned | 772_0  | Clustered           | 6 VC_772_0   | 6   | 0.0305 | 0.8101283  | 0.0247 | 0 | 0 | 0 | 1      | Ref |
| MG065675 | Unassigned | Unassigned | Unassigned | 941_0  | Clustered           | 40 VC_941_0  | 40  | 0.6903 | 1          | 0.6903 | 0 | 0 | 0 | 1      | Ref |
| MG065677 | Unassigned | Unassigned | Unassigned | 772_0  | Clustered           | 6 VC_772_0   | 6   | 0.0305 | 0.8101283  | 0.0247 | 0 | 0 | 0 | 1      | Ref |
| MG065679 | Unassigned | Unassigned | Unassigned | 941_0  | Clustered           | 40 VC_941_0  | 40  | 0.6903 | 1          | 0.6903 | 0 | 0 | 0 | 1      | Ref |
| MG065680 | Unassigned | Unassigned | Unassigned | 941_0  | Clustered           | 40 VC_941_0  | 40  | 0.6903 | 1          | 0.6903 | 0 | 0 | 0 | 1      | Ref |
| MG065681 | Unassigned | Unassigned | Unassigned | 941_0  | Clustered           | 40 VC_941_0  | 40  | 0.6903 | 1          | 0.6903 | 0 | 0 | 0 | 1      | Ref |
| MG065682 | Unassigned | Unassigned | Unassigned | 772_16 | Clustered           | 10 VC_772_16 | 10  | 0.0563 | 0.9434928  | 0.0531 | 0 | 0 | 0 | 0.8667 | Ref |
| MG065687 | Unassigned | Unassigned | Unassigned | 941_0  | Clustered           | 40 VC_941_0  | 40  | 0.6903 | 1          | 0.6903 | 0 | 0 | 0 | 1      | Ref |
| MG065688 | Unassigned | Unassigned | Unassigned | 456_0  | Clustered           | 62 VC_456_0  | 62  | 0.9026 | 1          | 0.9026 | 0 | 0 | 0 | 1      | Ref |
| MG065689 | Unassigned | Unassigned | Unassigned | 848_0  | Clustered           | 28 VC_848_0  | 28  | 0.7927 | 1          | 0.7927 | 0 | 0 | 0 | 1      | Ref |
| MG065690 | Unassigned | Unassigned | Unassigned | 772_0  | Clustered           | 6 VC_772_0   | 6   | 0.0305 | 0.8101283  | 0.0247 | 0 | 0 | 0 | 1      | Ref |
| MG065691 | Unassigned | Unassigned | Unassigned | 1219_0 | Clustered/Singleton | 1 VC_1219_0  | 1   | 0      | 1          | 0      | 0 | 0 | 0 | 1      | Ref |
| MG065692 | Unassigned | Unassigned | Unassigned | 190_31 | Clustered/Singleton | 1 VC_190_31  | 1   | 0      | 1          | 0      | 0 | 0 | 0 | 1      | Ref |
| MG099933 | Unassigned | Unassigned | Unassigned | 638_0  | Clustered           | 45 VC_638_0  | 45  | 0.7741 | 1          | 0.7741 | 0 | 0 | 0 | 1      | Ref |
| MG099934 | Unassigned | Unassigned | Unassigned | 940_0  | Clustered           | 34 VC_940_0  | 34  | 0.7959 | 1          | 0.7959 | 0 | 0 | 0 | 1      | Ref |
| MG099935 | Unassigned | Unassigned | Unassigned | 866_1  | Clustered           | 20 VC_866_1  | 20  | 0.4814 | 1          | 0.4814 | 0 | 0 | 0 | 1      | Ref |
| MG099936 | Unassigned | Unassigned | Unassigned | 521_0  | Clustered           | 37 VC_521_0  | 37  | 0.912  | 1          | 0.912  | 0 | 0 | 0 | 1      | Ref |
| MG099937 | Unassigned | Unassigned | Unassigned | 940_0  | Clustered           | 34 VC_940_0  | 34  | 0.7959 | 1          | 0.7959 | 0 | 0 | 0 | 1      | Ref |
| MG099938 | Unassigned | Unassigned | Unassigned | 940_0  | Clustered           | 34 VC_940_0  | 34  | 0.7959 | 1          | 0.7959 | 0 | 0 | 0 | 1      | Ref |
| MG099939 | Unassigned | Unassigned | Unassigned | 557_1  | Clustered           | 11 VC_557_1  | 11  | 0.4945 | 1          | 0.4945 | 0 | 0 | 0 | 0.7818 | Ref |
| MG099940 | Unassigned | Unassigned | Unassigned | 868_0  | Clustered           | 25 VC_868_0  | 25  | 0.5791 | 1          | 0.5791 | 0 | 0 | 0 | 1      | Ref |
| MG099941 | Unassigned | Unassigned | Unassigned | 1175_0 | Clustered           | 22 VC_1175_0 | 22  | 0.4562 | 1          | 0.4562 | 0 | 0 | 0 | 1      | Ref |
| MG099942 | Unassigned | Unassigned | Unassigned | 517_1  | Clustered           | 108 VC_517_1 | 108 | 0.8483 | 1          | 0.8483 | 0 | 0 | 0 | 0.9955 | Ref |
| MG099943 | Unassigned | Unassigned | Unassigned | 556_0  | Clustered           | 21 VC_556_0  | 21  | 0.9912 | 1          | 0.9912 | 0 | 0 | 0 | 1      | Ref |
| MG099944 | Unassigned | Unassigned | Unassigned | 940_0  | Clustered           | 34 VC_940_0  | 34  | 0.7959 | 1          | 0.7959 | 0 | 0 | 0 | 1      | Ref |
| MG099945 | Unassigned | Unassigned | Unassigned | 223_0  | Clustered           | 38 VC_223_0  | 38  | 0.9095 | 1          | 0.9095 | 0 | 0 | 0 | 1      | Ref |
| MG099946 | Unassigned | Unassigned | Unassigned | 761_0  | Clustered           | 67 VC_761_0  | 67  | 0.8947 | 1          | 0.8947 | 0 | 0 | 0 | 1      | Ref |
| MG099947 | Unassigned | Unassigned | Unassigned | 215_0  | Clustered           | 5 VC_215_0   | 5   | 0.0724 | 0.99999997 | 0.0724 | 0 | 0 | 0 | 1      | Ref |
| MG099948 | Unassigned | Unassigned | Unassigned | 521_0  | Clustered           | 37 VC_521_0  | 37  | 0.912  | 1          | 0.912  | 0 | 0 | 0 | 1      | Ref |
| MG099949 | Unassigned | Unassigned | Unassigned | 940_0  | Clustered           | 34 VC_940_0  | 34  | 0.7959 | 1          | 0.7959 | 0 | 0 | 0 | 1      | Ref |
| MG099950 | Unassigned | Unassigned | Unassigned | 1169_0 | Clustered           | 7 VC_1169_0  | 7   | 0.9811 | 0.99995613 | 0.981  | 0 | 0 | 0 | 1      | Ref |
| MG099951 | Unassigned | Unassigned | Unassigned | 325_38 | Clustered           | 6 VC_325_38  | 6   | 0.0267 | 1          | 0.0267 | 0 | 0 | 0 | 0.8    | Ref |
| MG099952 | Unassigned | Unassigned | Unassigned | 223_0  | Clustered           | 38 VC_223_0  | 38  | 0.9095 | 1          | 0.9095 | 0 | 0 | 0 | 1      | Ref |
| MG099953 | Unassigned | Unassigned | Unassigned | 551_8  | Clustered           | 19 VC_551_8  | 19  | 0.1039 | 1          | 0.1039 | 0 | 0 | 0 | 0.8713 | Ref |
| MG189906 | Unassigned | Unassigned | Unassigned | 905_0  | Clustered           | 3 VC_905_0   | 3   | 0.3424 | 0.99823775 | 0.3417 | 0 | 0 | 0 | 1      | Ref |
| MG198710 | Unassigned | Unassigned | Unassigned | 123_0  | Clustered           | 23 VC_123_0  | 23  | 0.817  | 1          | 0.817  | 0 | 0 | 0 | 1      | Ref |
| MG198776 | Unassigned | Unassigned | Unassigned | 768_0  | Clustered           | 8 VC_768_0   | 8   | 0.7012 | 1          | 0.7012 | 0 | 0 | 0 | 1      | Ref |
| MG198777 | Unassigned | Unassigned | Unassigned | 768_0  | Clustered           | 8 VC_768_0   | 8   | 0.7012 | 1          | 0.7012 | 0 | 0 | 0 | 1      | Ref |
| MG198778 | Unassigned | Unassigned | Unassigned | 768_0  | Clustered           | 8 VC_768_0   | 8   | 0.7012 | 1          | 0.7012 | 0 | 0 | 0 | 1      | Ref |
| MG198779 | Unassigned | Unassigned | Unassigned | 1160_0 | Clustered           | 73 VC_1160_0 | 73  | 0.9835 | 1          | 0.9835 | 0 | 0 | 0 | 1      | Ref |
| MG198780 | Unassigned | Unassigned | Unassigned | 768_0  | Clustered           | 8 VC_768_0   | 8   | 0.7012 | 1          | 0.7012 | 0 | 0 | 0 | 1      | Ref |
| MG198781 | Unassigned | Unassigned | Unassigned | 1160_0 | Clustered           | 73 VC_1160_0 | 73  | 0.9835 | 1          | 0.9835 | 0 | 0 | 0 | 1      | Ref |
| MG198782 | Unassigned | Unassigned | Unassigned | 1160_0 | Clustered           | 73 VC_1160_0 | 73  | 0.9835 | 1          | 0.9835 | 0 | 0 | 0 | 1      | Ref |
| MG198783 | Unassigned | Unassigned | Unassigned | 410_0  | Clustered           | 7 VC_410_0   | 7   | 0.7905 | 1          | 0.7905 | 0 | 0 | 0 | 1      | Ref |
| MG198784 | Unassigned | Unassigned | Unassigned | 410_0  | Clustered           | 7 VC_410_0   | 7   | 0.7905 | 1          | 0.7905 | 0 | 0 | 0 | 1      | Ref |
| MG198785 | Unassigned | Unassigned | Unassigned | 519_0  | Clustered           | 39 VC_519_0  | 39  | 0.8156 | 1          | 0.8156 | 0 | 0 | 0 | 1      | Ref |
| MG201401 | Unassigned | Unassigned | Unassigned | 72_0   | Clustered           | 2 VC_72_0    | 2   | 0.0777 | 0.95616461 | 0.0743 | 0 | 0 | 0 | 1      | Ref |
| MG208881 | Unassigned | Unassigned | Unassigned | 779_0  | Clustered           | 37 VC_779_0  | 37  | 0.5682 | 1          | 0.5682 | 0 | 0 | 0 | 1      | Ref |
| MG209611 | Unassigned | Unassigned | Unassigned | 932_0  | Clustered           | 2 VC_932_0   | 2   | 0.4438 | 0.89435023 | 0.3969 | 0 | 0 | 0 | 1      | Ref |
| MG210949 | Unassigned | Unassigned | Unassigned | 1160_0 | Clustered           | 73 VC_1160_0 | 73  | 0.9835 | 1          | 0.9835 | 0 | 0 | 0 | 1      | Ref |
| MG214764 | Unassigned | Unassigned | Unassigned | 1222_0 | Clustered           | 3 VC_1222_0  | 3   | 1      | 0          | 0      | 0 | 0 | 0 | 1      | Ref |
| MG241338 | Unassigned | Unassigned | Unassigned | 584_0  | Clustered           | 28 VC_584_0  | 28  | 0.7704 | 1          | 0.7704 | 0 | 0 | 0 | 1      | Ref |
| MG250485 | Unassigned | Unassigned | Unassigned | 129_0  | Clustered           | 43 VC_129_0  | 43  | 0.886  | 1          | 0.886  | 0 | 0 | 0 | 1      | Ref |
| MG250486 | Unassigned | Unassigned | Unassigned | 582_3  | Clustered           | 12 VC_582_3  | 12  | 0.2357 | 1          | 0.2357 | 0 | 0 | 0 | 0.8636 | Ref |
| MG251390 | Unassigned | Unassigned | Unassigned | 452_0  | Clustered           | 66 VC_452_0  | 66  | 0.9248 | 1          | 0.9248 | 0 | 0 | 0 | 1      | Ref |
| MG251391 | Unassigned | Unassigned | Unassigned | 329_1  | Clustered           | 17 VC_329_1  | 17  | 0.0867 | 1          | 0.0867 | 0 | 0 | 0 | 0.8235 | Ref |
| MG251392 | Unassigned | Unassigned | Unassigned | 329_1  | Clustered           | 17 VC_329_1  | 17  | 0.0867 | 1          | 0.0867 | 0 | 0 | 0 | 0.8235 | Ref |
| MG252615 | Unassigned | Unassigned | Unassigned | 638_0  | Clustered           | 45 VC_638_0  | 45  | 0.7741 | 1          | 0.7741 | 0 | 0 | 0 | 1      | Ref |



|          |            |            |            |        |                     |              |     |        |            |        |   |   |   |            |
|----------|------------|------------|------------|--------|---------------------|--------------|-----|--------|------------|--------|---|---|---|------------|
| MG252693 | Unassigned | Unassigned | Unassigned | 634_0  | Clustered           | 3 VC_634_0   | 3   | 0.2046 | 0.99837593 | 0.2043 | 0 | 0 | 0 | 1 Ref      |
| MG253647 | Unassigned | Unassigned | Unassigned | 202_0  | Clustered           | 102 VC_202_0 | 102 | 0.4049 | 1          | 0.4049 | 0 | 0 | 0 | 0.7876 Ref |
| MG253648 | Unassigned | Unassigned | Unassigned | 202_0  | Clustered           | 102 VC_202_0 | 102 | 0.4049 | 1          | 0.4049 | 0 | 0 | 0 | 0.7876 Ref |
| MG253649 | Unassigned | Unassigned | Unassigned | 202_0  | Clustered           | 102 VC_202_0 | 102 | 0.4049 | 1          | 0.4049 | 0 | 0 | 0 | 0.7876 Ref |
| MG253650 | Unassigned | Unassigned | Unassigned | 202_0  | Clustered           | 102 VC_202_0 | 102 | 0.4049 | 1          | 0.4049 | 0 | 0 | 0 | 0.7876 Ref |
| MG253651 | Unassigned | Unassigned | Unassigned | 202_0  | Clustered           | 102 VC_202_0 | 102 | 0.4049 | 1          | 0.4049 | 0 | 0 | 0 | 0.7876 Ref |
| MG253652 | Unassigned | Unassigned | Unassigned | 202_0  | Clustered           | 102 VC_202_0 | 102 | 0.4049 | 1          | 0.4049 | 0 | 0 | 0 | 0.7876 Ref |
| MG253653 | Unassigned | Unassigned | Unassigned | 202_0  | Clustered           | 102 VC_202_0 | 102 | 0.4049 | 1          | 0.4049 | 0 | 0 | 0 | 0.7876 Ref |
| MG264739 | Unassigned | Unassigned | Unassigned | 695_0  | Clustered           | 48 VC_695_0  | 48  | 0.8162 | 1          | 0.8162 | 0 | 0 | 0 | 1 Ref      |
| MG266157 | Unassigned | Unassigned | Unassigned | 131_0  | Clustered           | 17 VC_131_0  | 17  | 0.2671 | 1          | 0.2671 | 0 | 0 | 0 | 1 Ref      |
| MG269973 | Unassigned | Unassigned | Unassigned | 1223_0 | Clustered           | 2 VC_1223_0  | 2   | 1      | 1          | 1      | 0 | 0 | 0 | 1 Ref      |
| MG271909 | Unassigned | Unassigned | Unassigned | 873_0  | Clustered           | 3 VC_873_0   | 3   | 0.9107 | 0.98376334 | 0.8959 | 0 | 0 | 0 | 1 Ref      |
| MG280946 | Unassigned | Unassigned | Unassigned | 592_0  | Clustered           | 50 VC_592_0  | 50  | 0.7314 | 1          | 0.7314 | 0 | 0 | 0 | 1 Ref      |
| MG298964 | Unassigned | Unassigned | Unassigned | 982_0  | Clustered           | 62 VC_982_0  | 62  | 0.8646 | 1          | 0.8646 | 0 | 0 | 0 | 0.743 Ref  |
| MG309717 | Unassigned | Unassigned | Unassigned | 202_0  | Clustered           | 102 VC_202_0 | 102 | 0.4049 | 1          | 0.4049 | 0 | 0 | 0 | 0.7876 Ref |
| MG309718 | Unassigned | Unassigned | Unassigned | 202_0  | Clustered           | 102 VC_202_0 | 102 | 0.4049 | 1          | 0.4049 | 0 | 0 | 0 | 0.7876 Ref |
| MG324353 | Unassigned | Unassigned | Unassigned | 407_0  | Clustered           | 3 VC_407_0   | 3   | 0.3352 | 0.99824791 | 0.3346 | 0 | 0 | 0 | 1 Ref      |
| MG324354 | Unassigned | Unassigned | Unassigned | 407_0  | Clustered           | 3 VC_407_0   | 3   | 0.3352 | 0.99824791 | 0.3346 | 0 | 0 | 0 | 1 Ref      |
| MG366115 | Unassigned | Unassigned | Unassigned | 750_0  | Clustered/Singleton | 1 VC_750_0   | 1   | 0      | 1          | 0      | 0 | 0 | 0 | 1 Ref      |
| MG383452 | Unassigned | Unassigned | Unassigned | 133_27 | Clustered/Singleton | 1 VC_133_27  | 1   | 0      | 1          | 0      | 0 | 0 | 0 | 1 Ref      |
| MG387042 | Unassigned | Unassigned | Unassigned | 190_26 | Clustered/Singleton | 1 VC_190_26  | 1   | 0      | 1          | 0      | 0 | 0 | 0 | 1 Ref      |
| MG407615 | Unassigned | Unassigned | Unassigned | 28_1   | Clustered           | 53 VC_28_1   | 53  | 0.7164 | 1          | 0.7164 | 0 | 0 | 0 | 0.9325 Ref |
| MG428990 | Unassigned | Unassigned | Unassigned | 132_1  | Clustered           | 17 VC_132_1  | 17  | 0.1738 | 1          | 0.1738 | 0 | 0 | 0 | 0.9853 Ref |
| MG428991 | Unassigned | Unassigned | Unassigned | 132_1  | Clustered           | 17 VC_132_1  | 17  | 0.1738 | 1          | 0.1738 | 0 | 0 | 0 | 0.9853 Ref |
| MG428992 | Unassigned | Unassigned | Unassigned | 133_1  | Clustered/Singleton | 1 VC_133_1   | 1   | 0      | 1          | 0      | 0 | 0 | 0 | 1 Ref      |
| MG432137 | Unassigned | Unassigned | Unassigned | 123_0  | Clustered           | 23 VC_123_0  | 23  | 0.817  | 1          | 0.817  | 0 | 0 | 0 | 1 Ref      |
| MG432151 | Unassigned | Unassigned | Unassigned | 472_0  | Clustered           | 47 VC_472_0  | 47  | 0.9025 | 1          | 0.9025 | 0 | 0 | 0 | 1 Ref      |
| MG459218 | Unassigned | Unassigned | Unassigned | 699_0  | Clustered           | 71 VC_699_0  | 71  | 0.9352 | 1          | 0.9352 | 0 | 0 | 0 | 1 Ref      |
| MG459987 | Unassigned | Unassigned | Unassigned | 192_0  | Clustered           | 15 VC_192_0  | 15  | 0.5071 | 1          | 0.5071 | 0 | 0 | 0 | 1 Ref      |
| MG471392 | Unassigned | Unassigned | Unassigned | 386_0  | Clustered           | 49 VC_386_0  | 49  | 0.7941 | 1          | 0.7941 | 0 | 0 | 0 | 1 Ref      |
| MG488277 | Unassigned | Unassigned | Unassigned | 392_0  | Clustered           | 126 VC_392_0 | 126 | 0.9621 | 1          | 0.9621 | 0 | 0 | 0 | 1 Ref      |
| MG515223 | Unassigned | Unassigned | Unassigned | 1224_0 | Clustered           | 19 VC_1224_0 | 19  | 1      | 1          | 1      | 0 | 0 | 0 | 1 Ref      |
| MG518519 | Unassigned | Unassigned | Unassigned | 1224_0 | Clustered           | 19 VC_1224_0 | 19  | 1      | 1          | 1      | 0 | 0 | 0 | 1 Ref      |
| MG518520 | Unassigned | Unassigned | Unassigned | 1224_0 | Clustered           | 19 VC_1224_0 | 19  | 1      | 1          | 1      | 0 | 0 | 0 | 1 Ref      |
| MG543995 | Unassigned | Unassigned | Unassigned | 12_1   | Clustered           | 2 VC_12_1    | 2   | 0.0192 | 0.95739495 | 0.0184 | 0 | 0 | 0 | 1 Ref      |
| MG545917 | Unassigned | Unassigned | Unassigned | 1027_0 | Clustered           | 20 VC_1027_0 | 20  | 0.7114 | 1          | 0.7114 | 0 | 0 | 0 | 1 Ref      |
| MG550110 | Unassigned | Unassigned | Unassigned | 963_0  | Clustered           | 4 VC_963_0   | 4   | 0.8505 | 0.99879268 | 0.8495 | 0 | 0 | 0 | 1 Ref      |
| MG550111 | Unassigned | Unassigned | Unassigned | 963_0  | Clustered           | 4 VC_963_0   | 4   | 0.8505 | 0.99879268 | 0.8495 | 0 | 0 | 0 | 1 Ref      |
| MG550112 | Unassigned | Unassigned | Unassigned | 459_0  | Clustered           | 3 VC_459_0   | 3   | 0.8542 | 0.99054823 | 0.8461 | 0 | 0 | 0 | 1 Ref      |
| MG550113 | Unassigned | Unassigned | Unassigned | 963_0  | Clustered           | 4 VC_963_0   | 4   | 0.8505 | 0.99879268 | 0.8495 | 0 | 0 | 0 | 1 Ref      |
| MG552615 | Unassigned | Unassigned | Unassigned | 938_0  | Clustered           | 99 VC_938_0  | 99  | 0.9119 | 1          | 0.9119 | 0 | 0 | 0 | 0.9928 Ref |
| MG557618 | Unassigned | Unassigned | Unassigned | 149_15 | Clustered           | 16 VC_149_15 | 16  | 0.0788 | 1          | 0.0788 | 0 | 0 | 0 | 0.8083 Ref |
| MG557619 | Unassigned | Unassigned | Unassigned | 9_0    | Clustered           | 38 VC_9_0    | 38  | 0.4895 | 1          | 0.4895 | 0 | 0 | 0 | 1 Ref      |
| MG557979 | Unassigned | Unassigned | Unassigned | 526_0  | Clustered           | 6 VC_526_0   | 6   | 0.4386 | 1          | 0.4386 | 0 | 0 | 0 | 1 Ref      |
| MG563770 | Unassigned | Unassigned | Unassigned | 360_0  | Clustered           | 358 VC_360_0 | 358 | 0.9615 | 1          | 0.9615 | 0 | 0 | 0 | 1 Ref      |
| MG564297 | Unassigned | Unassigned | Unassigned | 12_1   | Clustered           | 2 VC_12_1    | 2   | 0.0192 | 0.95739495 | 0.0184 | 0 | 0 | 0 | 1 Ref      |
| MG575418 | Unassigned | Unassigned | Unassigned | 112_0  | Clustered           | 8 VC_112_0   | 8   | 0.2537 | 1          | 0.2537 | 0 | 0 | 0 | 1 Ref      |
| MG575419 | Unassigned | Unassigned | Unassigned | 112_0  | Clustered           | 8 VC_112_0   | 8   | 0.2537 | 1          | 0.2537 | 0 | 0 | 0 | 1 Ref      |
| MG575421 | Unassigned | Unassigned | Unassigned | 426_1  | Clustered           | 3 VC_426_1   | 3   | 0.1152 | 0.99804615 | 0.1149 | 0 | 0 | 0 | 1 Ref      |
| MG581355 | Unassigned | Unassigned | Unassigned | 835_0  | Clustered           | 67 VC_835_0  | 67  | 0.9624 | 1          | 0.9624 | 0 | 0 | 0 | 1 Ref      |
| MG589383 | Unassigned | Unassigned | Unassigned | 286_12 | Clustered           | 3 VC_286_12  | 3   | 0.0146 | 0.92328265 | 0.0135 | 0 | 0 | 0 | 1 Ref      |
| MG589384 | Unassigned | Unassigned | Unassigned | 328_0  | Clustered           | 11 VC_328_0  | 11  | 0.4707 | 1          | 0.4707 | 0 | 0 | 0 | 1 Ref      |
| MG589385 | Unassigned | Unassigned | Unassigned | 472_0  | Clustered           | 47 VC_472_0  | 47  | 0.9025 | 1          | 0.9025 | 0 | 0 | 0 | 1 Ref      |
| MG589386 | Unassigned | Unassigned | Unassigned | 472_0  | Clustered           | 47 VC_472_0  | 47  | 0.9025 | 1          | 0.9025 | 0 | 0 | 0 | 1 Ref      |
| MG589387 | Unassigned | Unassigned | Unassigned | 229_0  | Clustered           | 32 VC_229_0  | 32  | 0.9119 | 1          | 0.9119 | 0 | 0 | 0 | 1 Ref      |
| MG592390 | Unassigned | Unassigned | Unassigned | 645_0  | Clustered           | 8 VC_645_0   | 8   | 0.3138 | 1          | 0.3138 | 0 | 0 | 0 | 1 Ref      |
| MG592391 | Unassigned | Unassigned | Unassigned | 1041_0 | Clustered           | 9 VC_1041_0  | 9   | 0.6541 | 1          | 0.6541 | 0 | 0 | 0 | 1 Ref      |
| MG592392 | Unassigned | Unassigned | Unassigned | 499_0  | Clustered           | 24 VC_499_0  | 24  | 0.8569 | 1          | 0.8569 | 0 | 0 | 0 | 0.9529 Ref |
| MG592393 | Unassigned | Unassigned | Unassigned | 646_0  | Clustered           | 29 VC_646_0  | 29  | 0.9131 | 1          | 0.9131 | 0 | 0 | 0 | 1 Ref      |
| MG592394 | Unassigned | Unassigned | Unassigned | 1225_0 | Clustered           | 4 VC_1225_0  | 4   | 0.9619 | 0.99374885 | 0.9559 | 0 | 0 | 0 | 1 Ref      |
| MG592395 | Unassigned | Unassigned | Unassigned | 498_0  | Clustered           | 8 VC_498_0   | 8   | 0.3987 | 1          | 0.3987 | 0 | 0 | 0 | 1 Ref      |
| MG592397 | Unassigned | Unassigned | Unassigned | 1050_1 | Clustered           | 29 VC_1050_1 | 29  | 0.4861 | 1          | 0.4861 | 0 | 0 | 0 | 0.9581 Ref |
| MG592398 | Unassigned | Unassigned | Unassigned | 944_0  | Clustered           | 6 VC_944_0   | 6   | 0.8196 | 1          | 0.8196 | 0 | 0 | 0 | 1 Ref      |
| MG592399 | Unassigned | Unassigned | Unassigned | 543_0  | Clustered           | 6 VC_543_0   | 6   | 0.864  | 0.99999948 | 0.864  | 0 | 0 | 0 | 1 Ref      |
| MG592400 | Unassigned | Unassigned | Unassigned | 122_0  | Clustered           | 5 VC_122_0   | 5   | 0.2073 | 0.99999996 | 0.2073 | 0 | 0 | 0 | 1 Ref      |
| MG592401 | Unassigned | Unassigned | Unassigned | 499_0  | Clustered           | 24 VC_499_0  | 24  | 0.8569 | 1          | 0.8569 | 0 | 0 | 0 | 0.9529 Ref |
| MG592402 | Unassigned | Unassigned | Unassigned | 1225_0 | Clustered           | 4 VC_1225_0  | 4   | 0.9619 | 0.99374885 | 0.9559 | 0 | 0 | 0 | 1 Ref      |
| MG592403 | Unassigned | Unassigned | Unassigned | 296_0  | Clustered           | 6 VC_296_0   | 6   | 0.5315 | 1          | 0.5315 | 0 | 0 | 0 | 1 Ref      |
| MG592404 | Unassigned | Unassigned | Unassigned | 296_0  | Clustered           | 6 VC_296_0   | 6   | 0.5315 | 1          | 0.5315 | 0 | 0 | 0 | 1 Ref      |
| MG592405 | Unassigned | Unassigned | Unassigned | 296_0  | Clustered           | 6 VC_296_0   | 6   | 0.5315 | 1          | 0.5315 | 0 | 0 | 0 | 1 Ref      |
| MG592406 | Unassigned | Unassigned | Unassigned | 1050_1 | Clustered           | 29 VC_1050_1 | 29  | 0.4861 | 1          | 0.4861 | 0 | 0 | 0 | 0.9581 Ref |
| MG592407 | Unassigned | Unassigned | Unassigned | 1050_1 | Clustered           | 29 VC_1050_1 | 29  | 0.4861 | 1          | 0.4861 | 0 | 0 | 0 | 0.9581 Ref |
| MG592408 | Unassigned | Unassigned | Unassigned | 1050_1 | Clustered           | 29 VC_1050_1 | 29  | 0.4861 | 1          | 0.4861 | 0 | 0 | 0 | 0.9581 Ref |
| MG592409 | Unassigned | Unassigned | Unassigned | 930_0  | Clustered           | 7 VC_930_0   | 7   | 0.519  | 1          | 0.519  | 0 | 0 | 0 | 1 Ref      |
| MG592410 | Unassigned | Unassigned | Unassigned | 930_0  | Clustered           | 7 VC_930_0   | 7   | 0.519  | 1          | 0.519  | 0 | 0 | 0 | 1 Ref      |
| MG592411 | Unassigned | Unassigned | Unassigned | 1050_0 | Clustered           | 24 VC_1050_0 | 24  | 0.5274 | 1          | 0.5274 | 0 | 0 | 0 | 1 Ref      |
| MG592412 | Unassigned | Unassigned | Unassigned | 248_0  | Clustered           | 11 VC_248_0  | 11  | 0.7031 | 1          | 0.7031 | 0 | 0 | 0 | 1 Ref      |
| MG592414 | Unassigned | Unassigned | Unassigned | 499_0  | Clustered           | 24 VC_499_0  | 24  | 0.8569 | 1          | 0.8569 | 0 | 0 | 0 | 0.9529 Ref |
| MG592415 | Unassigned | Unassigned | Unassigned | 478_0  | Clustered           | 2 VC_478_0   | 2   | 0.3505 | 0.94766489 | 0.3321 | 0 | 0 | 0 | 1 Ref      |
| MG592416 | Unassigned | Unassigned | Unassigned | 1050_1 | Clustered           | 29 VC_1050_1 | 29  | 0.4861 | 1          | 0.4861 | 0 | 0 | 0 | 0.9581 Ref |
| MG592417 | Unassigned | Unassigned | Unassigned | 1050_1 | Clustered           | 29 VC_1050_1 | 29  | 0.4861 | 1          | 0.4861 | 0 | 0 | 0 | 0.9581 Ref |



|          |            |            |            |        |                     |              |    |        |            |        |   |   |   |            |
|----------|------------|------------|------------|--------|---------------------|--------------|----|--------|------------|--------|---|---|---|------------|
| MG592418 | Unassigned | Unassigned | Unassigned | 543_0  | Clustered           | 6 VC_543_0   | 6  | 0.864  | 0.99999948 | 0.864  | 0 | 0 | 0 | 1 Ref      |
| MG592419 | Unassigned | Unassigned | Unassigned | 543_0  | Clustered           | 6 VC_543_0   | 6  | 0.864  | 0.99999948 | 0.864  | 0 | 0 | 0 | 1 Ref      |
| MG592420 | Unassigned | Unassigned | Unassigned | 645_0  | Clustered           | 8 VC_645_0   | 8  | 0.3138 | 1          | 0.3138 | 0 | 0 | 0 | 1 Ref      |
| MG592421 | Unassigned | Unassigned | Unassigned | 1041_0 | Clustered           | 9 VC_1041_0  | 9  | 0.6541 | 1          | 0.6541 | 0 | 0 | 0 | 1 Ref      |
| MG592422 | Unassigned | Unassigned | Unassigned | 122_0  | Clustered           | 5 VC_122_0   | 5  | 0.2073 | 0.99999996 | 0.2073 | 0 | 0 | 0 | 1 Ref      |
| MG592423 | Unassigned | Unassigned | Unassigned | 645_0  | Clustered           | 8 VC_645_0   | 8  | 0.3138 | 1          | 0.3138 | 0 | 0 | 0 | 1 Ref      |
| MG592425 | Unassigned | Unassigned | Unassigned | 122_0  | Clustered           | 5 VC_122_0   | 5  | 0.2073 | 0.99999996 | 0.2073 | 0 | 0 | 0 | 1 Ref      |
| MG592427 | Unassigned | Unassigned | Unassigned | 1225_0 | Clustered           | 4 VC_1225_0  | 4  | 0.9619 | 0.99374885 | 0.9559 | 0 | 0 | 0 | 1 Ref      |
| MG592428 | Unassigned | Unassigned | Unassigned | 1050_1 | Clustered           | 29 VC_1050_1 | 29 | 0.4861 | 1          | 0.4861 | 0 | 0 | 0 | 0.9581 Ref |
| MG592429 | Unassigned | Unassigned | Unassigned | 948_0  | Clustered           | 9 VC_948_0   | 9  | 0.5443 | 1          | 0.5443 | 0 | 0 | 0 | 1 Ref      |
| MG592431 | Unassigned | Unassigned | Unassigned | 827_0  | Clustered           | 6 VC_827_0   | 6  | 0.7493 | 1          | 0.7493 | 0 | 0 | 0 | 1 Ref      |
| MG592432 | Unassigned | Unassigned | Unassigned | 827_0  | Clustered           | 6 VC_827_0   | 6  | 0.7493 | 1          | 0.7493 | 0 | 0 | 0 | 1 Ref      |
| MG592434 | Unassigned | Unassigned | Unassigned | 122_1  | Clustered/Singleton | 1 VC_122_1   | 1  | 0      | 1          | 0      | 0 | 0 | 0 | 1 Ref      |
| MG592435 | Unassigned | Unassigned | Unassigned | 827_0  | Clustered           | 6 VC_827_0   | 6  | 0.7493 | 1          | 0.7493 | 0 | 0 | 0 | 1 Ref      |
| MG592436 | Unassigned | Unassigned | Unassigned | 1041_0 | Clustered           | 9 VC_1041_0  | 9  | 0.6541 | 1          | 0.6541 | 0 | 0 | 0 | 1 Ref      |
| MG592438 | Unassigned | Unassigned | Unassigned | 948_0  | Clustered           | 9 VC_948_0   | 9  | 0.5443 | 1          | 0.5443 | 0 | 0 | 0 | 1 Ref      |
| MG592439 | Unassigned | Unassigned | Unassigned | 645_0  | Clustered           | 8 VC_645_0   | 8  | 0.3138 | 1          | 0.3138 | 0 | 0 | 0 | 1 Ref      |
| MG592441 | Unassigned | Unassigned | Unassigned | 493_8  | Clustered/Singleton | 1 VC_493_8   | 1  | 0      | 1          | 0      | 0 | 0 | 0 | 1 Ref      |
| MG592442 | Unassigned | Unassigned | Unassigned | 924_0  | Clustered           | 34 VC_924_0  | 34 | 0.8942 | 1          | 0.8942 | 0 | 0 | 0 | 0.9768 Ref |
| MG592443 | Unassigned | Unassigned | Unassigned | 1041_0 | Clustered           | 9 VC_1041_0  | 9  | 0.6541 | 1          | 0.6541 | 0 | 0 | 0 | 1 Ref      |
| MG592444 | Unassigned | Unassigned | Unassigned | 645_0  | Clustered           | 8 VC_645_0   | 8  | 0.3138 | 1          | 0.3138 | 0 | 0 | 0 | 1 Ref      |
| MG592445 | Unassigned | Unassigned | Unassigned | 1041_0 | Clustered           | 9 VC_1041_0  | 9  | 0.6541 | 1          | 0.6541 | 0 | 0 | 0 | 1 Ref      |
| MG592447 | Unassigned | Unassigned | Unassigned | 544_0  | Clustered           | 2 VC_544_0   | 2  | 0.3517 | 0.94059057 | 0.3308 | 0 | 0 | 0 | 1 Ref      |
| MG592448 | Unassigned | Unassigned | Unassigned | 122_0  | Clustered           | 5 VC_122_0   | 5  | 0.2073 | 0.99999996 | 0.2073 | 0 | 0 | 0 | 1 Ref      |
| MG592449 | Unassigned | Unassigned | Unassigned | 1041_0 | Clustered           | 9 VC_1041_0  | 9  | 0.6541 | 1          | 0.6541 | 0 | 0 | 0 | 1 Ref      |
| MG592450 | Unassigned | Unassigned | Unassigned | 924_0  | Clustered           | 34 VC_924_0  | 34 | 0.8942 | 1          | 0.8942 | 0 | 0 | 0 | 0.9768 Ref |
| MG592451 | Unassigned | Unassigned | Unassigned | 499_0  | Clustered           | 24 VC_499_0  | 24 | 0.8569 | 1          | 0.8569 | 0 | 0 | 0 | 0.9529 Ref |
| MG592453 | Unassigned | Unassigned | Unassigned | 544_0  | Clustered           | 2 VC_544_0   | 2  | 0.3517 | 0.94059057 | 0.3308 | 0 | 0 | 0 | 1 Ref      |
| MG592454 | Unassigned | Unassigned | Unassigned | 645_0  | Clustered           | 8 VC_645_0   | 8  | 0.3138 | 1          | 0.3138 | 0 | 0 | 0 | 1 Ref      |
| MG592455 | Unassigned | Unassigned | Unassigned | 1225_0 | Clustered           | 4 VC_1225_0  | 4  | 0.9619 | 0.99374885 | 0.9559 | 0 | 0 | 0 | 1 Ref      |
| MG592456 | Unassigned | Unassigned | Unassigned | 531_4  | Clustered/Singleton | 1 VC_531_4   | 1  | 0      | 1          | 0      | 0 | 0 | 0 | 1 Ref      |
| MG592457 | Unassigned | Unassigned | Unassigned | 924_0  | Clustered           | 34 VC_924_0  | 34 | 0.8942 | 1          | 0.8942 | 0 | 0 | 0 | 0.9768 Ref |
| MG592458 | Unassigned | Unassigned | Unassigned | 827_0  | Clustered           | 6 VC_827_0   | 6  | 0.7493 | 1          | 0.7493 | 0 | 0 | 0 | 1 Ref      |
| MG592459 | Unassigned | Unassigned | Unassigned | 497_0  | Clustered/Singleton | 1 VC_497_0   | 1  | 0      | 1          | 0      | 0 | 0 | 0 | 1 Ref      |
| MG592460 | Unassigned | Unassigned | Unassigned | 924_0  | Clustered           | 34 VC_924_0  | 34 | 0.8942 | 1          | 0.8942 | 0 | 0 | 0 | 0.9768 Ref |
| MG592461 | Unassigned | Unassigned | Unassigned | 499_0  | Clustered           | 24 VC_499_0  | 24 | 0.8569 | 1          | 0.8569 | 0 | 0 | 0 | 0.9529 Ref |
| MG592462 | Unassigned | Unassigned | Unassigned | 499_0  | Clustered           | 24 VC_499_0  | 24 | 0.8569 | 1          | 0.8569 | 0 | 0 | 0 | 0.9529 Ref |
| MG592463 | Unassigned | Unassigned | Unassigned | 1050_1 | Clustered           | 29 VC_1050_1 | 29 | 0.4861 | 1          | 0.4861 | 0 | 0 | 0 | 0.9581 Ref |
| MG592464 | Unassigned | Unassigned | Unassigned | 1050_1 | Clustered           | 29 VC_1050_1 | 29 | 0.4861 | 1          | 0.4861 | 0 | 0 | 0 | 0.9581 Ref |
| MG592465 | Unassigned | Unassigned | Unassigned | 645_0  | Clustered           | 8 VC_645_0   | 8  | 0.3138 | 1          | 0.3138 | 0 | 0 | 0 | 1 Ref      |
| MG592466 | Unassigned | Unassigned | Unassigned | 645_0  | Clustered           | 8 VC_645_0   | 8  | 0.3138 | 1          | 0.3138 | 0 | 0 | 0 | 1 Ref      |
| MG592467 | Unassigned | Unassigned | Unassigned | 499_0  | Clustered           | 24 VC_499_0  | 24 | 0.8569 | 1          | 0.8569 | 0 | 0 | 0 | 0.9529 Ref |
| MG592468 | Unassigned | Unassigned | Unassigned | 499_0  | Clustered           | 24 VC_499_0  | 24 | 0.8569 | 1          | 0.8569 | 0 | 0 | 0 | 0.9529 Ref |
| MG592470 | Unassigned | Unassigned | Unassigned | 930_0  | Clustered           | 7 VC_930_0   | 7  | 0.519  | 1          | 0.519  | 0 | 0 | 0 | 1 Ref      |
| MG592471 | Unassigned | Unassigned | Unassigned | 1050_1 | Clustered           | 29 VC_1050_1 | 29 | 0.4861 | 1          | 0.4861 | 0 | 0 | 0 | 0.9581 Ref |
| MG592472 | Unassigned | Unassigned | Unassigned | 499_0  | Clustered           | 24 VC_499_0  | 24 | 0.8569 | 1          | 0.8569 | 0 | 0 | 0 | 0.9529 Ref |
| MG592473 | Unassigned | Unassigned | Unassigned | 497_1  | Clustered/Singleton | 1 VC_497_1   | 1  | 0      | 1          | 0      | 0 | 0 | 0 | 1 Ref      |
| MG592475 | Unassigned | Unassigned | Unassigned | 1050_1 | Clustered           | 29 VC_1050_1 | 29 | 0.4861 | 1          | 0.4861 | 0 | 0 | 0 | 0.9581 Ref |
| MG592476 | Unassigned | Unassigned | Unassigned | 1050_1 | Clustered           | 29 VC_1050_1 | 29 | 0.4861 | 1          | 0.4861 | 0 | 0 | 0 | 0.9581 Ref |
| MG592477 | Unassigned | Unassigned | Unassigned | 646_0  | Clustered           | 29 VC_646_0  | 29 | 0.9131 | 1          | 0.9131 | 0 | 0 | 0 | 1 Ref      |
| MG592478 | Unassigned | Unassigned | Unassigned | 646_0  | Clustered           | 29 VC_646_0  | 29 | 0.9131 | 1          | 0.9131 | 0 | 0 | 0 | 1 Ref      |
| MG592482 | Unassigned | Unassigned | Unassigned | 924_0  | Clustered           | 34 VC_924_0  | 34 | 0.8942 | 1          | 0.8942 | 0 | 0 | 0 | 0.9768 Ref |
| MG592483 | Unassigned | Unassigned | Unassigned | 924_0  | Clustered           | 34 VC_924_0  | 34 | 0.8942 | 1          | 0.8942 | 0 | 0 | 0 | 0.9768 Ref |
| MG592484 | Unassigned | Unassigned | Unassigned | 1190_0 | Clustered           | 2 VC_1190_0  | 2  | 0.5104 | 0.94764538 | 0.4837 | 0 | 0 | 0 | 1 Ref      |
| MG592485 | Unassigned | Unassigned | Unassigned | 1190_0 | Clustered           | 2 VC_1190_0  | 2  | 0.5104 | 0.94764538 | 0.4837 | 0 | 0 | 0 | 1 Ref      |
| MG592486 | Unassigned | Unassigned | Unassigned | 122_0  | Clustered           | 5 VC_122_0   | 5  | 0.2073 | 0.99999996 | 0.2073 | 0 | 0 | 0 | 1 Ref      |
| MG592487 | Unassigned | Unassigned | Unassigned | 948_0  | Clustered           | 9 VC_948_0   | 9  | 0.5443 | 1          | 0.5443 | 0 | 0 | 0 | 1 Ref      |
| MG592488 | Unassigned | Unassigned | Unassigned | 924_0  | Clustered           | 34 VC_924_0  | 34 | 0.8942 | 1          | 0.8942 | 0 | 0 | 0 | 0.9768 Ref |
| MG592489 | Unassigned | Unassigned | Unassigned | 924_0  | Clustered           | 34 VC_924_0  | 34 | 0.8942 | 1          | 0.8942 | 0 | 0 | 0 | 0.9768 Ref |
| MG592490 | Unassigned | Unassigned | Unassigned | 924_0  | Clustered           | 34 VC_924_0  | 34 | 0.8942 | 1          | 0.8942 | 0 | 0 | 0 | 0.9768 Ref |
| MG592492 | Unassigned | Unassigned | Unassigned | 1050_1 | Clustered           | 29 VC_1050_1 | 29 | 0.4861 | 1          | 0.4861 | 0 | 0 | 0 | 0.9581 Ref |
| MG592493 | Unassigned | Unassigned | Unassigned | 1050_1 | Clustered           | 29 VC_1050_1 | 29 | 0.4861 | 1          | 0.4861 | 0 | 0 | 0 | 0.9581 Ref |
| MG592494 | Unassigned | Unassigned | Unassigned | 642_3  | Clustered           | 9 VC_642_3   | 9  | 0.2131 | 1          | 0.2131 | 0 | 0 | 0 | 0.6944 Ref |
| MG592495 | Unassigned | Unassigned | Unassigned | 493_6  | Clustered/Singleton | 1 VC_493_6   | 1  | 0      | 1          | 0      | 0 | 0 | 0 | 1 Ref      |
| MG592496 | Unassigned | Unassigned | Unassigned | 944_0  | Clustered           | 6 VC_944_0   | 6  | 0.8196 | 1          | 0.8196 | 0 | 0 | 0 | 1 Ref      |
| MG592497 | Unassigned | Unassigned | Unassigned | 944_0  | Clustered           | 6 VC_944_0   | 6  | 0.8196 | 1          | 0.8196 | 0 | 0 | 0 | 1 Ref      |
| MG592499 | Unassigned | Unassigned | Unassigned | 499_0  | Clustered           | 24 VC_499_0  | 24 | 0.8569 | 1          | 0.8569 | 0 | 0 | 0 | 0.9529 Ref |
| MG592501 | Unassigned | Unassigned | Unassigned | 642_3  | Clustered           | 9 VC_642_3   | 9  | 0.2131 | 1          | 0.2131 | 0 | 0 | 0 | 0.6944 Ref |
| MG592502 | Unassigned | Unassigned | Unassigned | 924_0  | Clustered           | 34 VC_924_0  | 34 | 0.8942 | 1          | 0.8942 | 0 | 0 | 0 | 0.9768 Ref |
| MG592503 | Unassigned | Unassigned | Unassigned | 924_0  | Clustered           | 34 VC_924_0  | 34 | 0.8942 | 1          | 0.8942 | 0 | 0 | 0 | 0.9768 Ref |
| MG592504 | Unassigned | Unassigned | Unassigned | 924_0  | Clustered           | 34 VC_924_0  | 34 | 0.8942 | 1          | 0.8942 | 0 | 0 | 0 | 0.9768 Ref |
| MG592505 | Unassigned | Unassigned | Unassigned | 924_0  | Clustered           | 34 VC_924_0  | 34 | 0.8942 | 1          | 0.8942 | 0 | 0 | 0 | 0.9768 Ref |
| MG592506 | Unassigned | Unassigned | Unassigned | 642_0  | Clustered           | 7 VC_642_0   | 7  | 0.1508 | 1          | 0.1508 | 0 | 0 | 0 | 0.7619 Ref |
| MG592507 | Unassigned | Unassigned | Unassigned | 248_0  | Clustered           | 11 VC_248_0  | 11 | 0.7031 | 1          | 0.7031 | 0 | 0 | 0 | 1 Ref      |
| MG592508 | Unassigned | Unassigned | Unassigned | 642_3  | Clustered           | 9 VC_642_3   | 9  | 0.2131 | 1          | 0.2131 | 0 | 0 | 0 | 0.6944 Ref |
| MG592509 | Unassigned | Unassigned | Unassigned | 501_0  | Clustered           | 16 VC_501_0  | 16 | 0.9985 | 1          | 0.9985 | 0 | 0 | 0 | 1 Ref      |
| MG592510 | Unassigned | Unassigned | Unassigned | 543_0  | Clustered           | 6 VC_543_0   | 6  | 0.864  | 0.99999948 | 0.864  | 0 | 0 | 0 | 1 Ref      |
| MG592511 | Unassigned | Unassigned | Unassigned | 543_0  | Clustered           | 6 VC_543_0   | 6  | 0.864  | 0.99999948 | 0.864  | 0 | 0 | 0 | 1 Ref      |
| MG592513 | Unassigned | Unassigned | Unassigned | 248_0  | Clustered           | 11 VC_248_0  | 11 | 0.7031 | 1          | 0.7031 | 0 | 0 | 0 | 1 Ref      |
| MG592514 | Unassigned | Unassigned | Unassigned | 642_3  | Clustered           | 9 VC_642_3   | 9  | 0.2131 | 1          | 0.2131 | 0 | 0 | 0 | 0.6944 Ref |
| MG592516 | Unassigned | Unassigned | Unassigned | 924_0  | Clustered           | 34 VC_924_0  | 34 | 0.8942 | 1          | 0.8942 | 0 | 0 | 0 | 0.9768 Ref |



|          |            |            |            |        |                     |              |    |        |            |        |   |   |   |        |     |
|----------|------------|------------|------------|--------|---------------------|--------------|----|--------|------------|--------|---|---|---|--------|-----|
| MG592517 | Unassigned | Unassigned | Unassigned | 924_0  | Clustered           | 34 VC_924_0  | 34 | 0.8942 | 1          | 0.8942 | 0 | 0 | 0 | 0.9768 | Ref |
| MG592518 | Unassigned | Unassigned | Unassigned | 646_0  | Clustered           | 29 VC_646_0  | 29 | 0.9131 | 1          | 0.9131 | 0 | 0 | 0 | 1      | Ref |
| MG592519 | Unassigned | Unassigned | Unassigned | 930_0  | Clustered           | 7 VC_930_0   | 7  | 0.519  | 1          | 0.519  | 0 | 0 | 0 | 1      | Ref |
| MG592520 | Unassigned | Unassigned | Unassigned | 926_0  | Clustered           | 3 VC_926_0   | 3  | 0.9445 | 0.99430386 | 0.9391 | 0 | 0 | 0 | 1      | Ref |
| MG592521 | Unassigned | Unassigned | Unassigned | 930_0  | Clustered           | 7 VC_930_0   | 7  | 0.519  | 1          | 0.519  | 0 | 0 | 0 | 1      | Ref |
| MG592522 | Unassigned | Unassigned | Unassigned | 909_0  | Clustered           | 5 VC_909_0   | 5  | 0.7406 | 0.9999861  | 0.7406 | 0 | 0 | 0 | 1      | Ref |
| MG592523 | Unassigned | Unassigned | Unassigned | 115_0  | Clustered           | 2 VC_115_0   | 2  | 0.4117 | 0.90744399 | 0.3736 | 0 | 0 | 0 | 1      | Ref |
| MG592524 | Unassigned | Unassigned | Unassigned | 248_0  | Clustered           | 11 VC_248_0  | 11 | 0.7031 | 1          | 0.7031 | 0 | 0 | 0 | 1      | Ref |
| MG592525 | Unassigned | Unassigned | Unassigned | 924_0  | Clustered           | 34 VC_924_0  | 34 | 0.8942 | 1          | 0.8942 | 0 | 0 | 0 | 0.9768 | Ref |
| MG592526 | Unassigned | Unassigned | Unassigned | 499_0  | Clustered           | 24 VC_499_0  | 24 | 0.8569 | 1          | 0.8569 | 0 | 0 | 0 | 0.9529 | Ref |
| MG592527 | Unassigned | Unassigned | Unassigned | 248_0  | Clustered           | 11 VC_248_0  | 11 | 0.7031 | 1          | 0.7031 | 0 | 0 | 0 | 1      | Ref |
| MG592528 | Unassigned | Unassigned | Unassigned | 1050_1 | Clustered           | 29 VC_1050_1 | 29 | 0.4861 | 1          | 0.4861 | 0 | 0 | 0 | 0.9581 | Ref |
| MG592529 | Unassigned | Unassigned | Unassigned | 493_2  | Clustered/Singleton | 1 VC_493_2   | 1  | 0      | 1          | 0      | 0 | 0 | 0 | 1      | Ref |
| MG592530 | Unassigned | Unassigned | Unassigned | 924_0  | Clustered           | 34 VC_924_0  | 34 | 0.8942 | 1          | 0.8942 | 0 | 0 | 0 | 0.9768 | Ref |
| MG592531 | Unassigned | Unassigned | Unassigned | 499_0  | Clustered           | 24 VC_499_0  | 24 | 0.8569 | 1          | 0.8569 | 0 | 0 | 0 | 0.9529 | Ref |
| MG592532 | Unassigned | Unassigned | Unassigned | 924_0  | Clustered           | 34 VC_924_0  | 34 | 0.8942 | 1          | 0.8942 | 0 | 0 | 0 | 0.9768 | Ref |
| MG592533 | Unassigned | Unassigned | Unassigned | 1226_0 | Clustered           | 2 VC_1226_0  | 2  | 0.6497 | 0.86822376 | 0.564  | 0 | 0 | 0 | 1      | Ref |
| MG592534 | Unassigned | Unassigned | Unassigned | 924_0  | Clustered           | 34 VC_924_0  | 34 | 0.8942 | 1          | 0.8942 | 0 | 0 | 0 | 0.9768 | Ref |
| MG592535 | Unassigned | Unassigned | Unassigned | 924_0  | Clustered           | 34 VC_924_0  | 34 | 0.8942 | 1          | 0.8942 | 0 | 0 | 0 | 0.9768 | Ref |
| MG592536 | Unassigned | Unassigned | Unassigned | 1227_0 | Clustered           | 6 VC_1227_0  | 6  | 0.9303 | 0.99999969 | 0.9303 | 0 | 0 | 0 | 1      | Ref |
| MG592538 | Unassigned | Unassigned | Unassigned | 1050_0 | Clustered           | 24 VC_1050_0 | 24 | 0.5274 | 1          | 0.5274 | 0 | 0 | 0 | 1      | Ref |
| MG592539 | Unassigned | Unassigned | Unassigned | 924_0  | Clustered           | 34 VC_924_0  | 34 | 0.8942 | 1          | 0.8942 | 0 | 0 | 0 | 0.9768 | Ref |
| MG592540 | Unassigned | Unassigned | Unassigned | 646_0  | Clustered           | 29 VC_646_0  | 29 | 0.9131 | 1          | 0.9131 | 0 | 0 | 0 | 1      | Ref |
| MG592541 | Unassigned | Unassigned | Unassigned | 499_0  | Clustered           | 24 VC_499_0  | 24 | 0.8569 | 1          | 0.8569 | 0 | 0 | 0 | 0.9529 | Ref |
| MG592542 | Unassigned | Unassigned | Unassigned | 499_0  | Clustered           | 24 VC_499_0  | 24 | 0.8569 | 1          | 0.8569 | 0 | 0 | 0 | 0.9529 | Ref |
| MG592543 | Unassigned | Unassigned | Unassigned | 924_0  | Clustered           | 34 VC_924_0  | 34 | 0.8942 | 1          | 0.8942 | 0 | 0 | 0 | 0.9768 | Ref |
| MG592544 | Unassigned | Unassigned | Unassigned | 642_5  | Clustered           | 4 VC_642_5   | 4  | 0.0902 | 0.99996664 | 0.0902 | 0 | 0 | 0 | 1      | Ref |
| MG592545 | Unassigned | Unassigned | Unassigned | 642_0  | Clustered           | 7 VC_642_0   | 7  | 0.1508 | 1          | 0.1508 | 0 | 0 | 0 | 0.7619 | Ref |
| MG592546 | Unassigned | Unassigned | Unassigned | 501_0  | Clustered           | 16 VC_501_0  | 16 | 0.9985 | 1          | 0.9985 | 0 | 0 | 0 | 1      | Ref |
| MG592547 | Unassigned | Unassigned | Unassigned | 499_0  | Clustered           | 24 VC_499_0  | 24 | 0.8569 | 1          | 0.8569 | 0 | 0 | 0 | 0.9529 | Ref |
| MG592549 | Unassigned | Unassigned | Unassigned | 807_0  | Clustered           | 17 VC_807_0  | 17 | 0.907  | 1          | 0.907  | 0 | 0 | 0 | 1      | Ref |
| MG592550 | Unassigned | Unassigned | Unassigned | 807_0  | Clustered           | 17 VC_807_0  | 17 | 0.907  | 1          | 0.907  | 0 | 0 | 0 | 1      | Ref |
| MG592551 | Unassigned | Unassigned | Unassigned | 296_0  | Clustered           | 6 VC_296_0   | 6  | 0.5315 | 1          | 0.5315 | 0 | 0 | 0 | 1      | Ref |
| MG592552 | Unassigned | Unassigned | Unassigned | 646_0  | Clustered           | 29 VC_646_0  | 29 | 0.9131 | 1          | 0.9131 | 0 | 0 | 0 | 1      | Ref |
| MG592553 | Unassigned | Unassigned | Unassigned | 493_16 | Clustered/Singleton | 1 VC_493_16  | 1  | 0      | 1          | 0      | 0 | 0 | 0 | 1      | Ref |
| MG592554 | Unassigned | Unassigned | Unassigned | 1227_0 | Clustered           | 6 VC_1227_0  | 6  | 0.9303 | 0.99999969 | 0.9303 | 0 | 0 | 0 | 1      | Ref |
| MG592555 | Unassigned | Unassigned | Unassigned | 1227_0 | Clustered           | 6 VC_1227_0  | 6  | 0.9303 | 0.99999969 | 0.9303 | 0 | 0 | 0 | 1      | Ref |
| MG592556 | Unassigned | Unassigned | Unassigned | 1227_0 | Clustered           | 6 VC_1227_0  | 6  | 0.9303 | 0.99999969 | 0.9303 | 0 | 0 | 0 | 1      | Ref |
| MG592557 | Unassigned | Unassigned | Unassigned | 924_0  | Clustered           | 34 VC_924_0  | 34 | 0.8942 | 1          | 0.8942 | 0 | 0 | 0 | 0.9768 | Ref |
| MG592558 | Unassigned | Unassigned | Unassigned | 924_0  | Clustered           | 34 VC_924_0  | 34 | 0.8942 | 1          | 0.8942 | 0 | 0 | 0 | 0.9768 | Ref |
| MG592559 | Unassigned | Unassigned | Unassigned | 924_0  | Clustered           | 34 VC_924_0  | 34 | 0.8942 | 1          | 0.8942 | 0 | 0 | 0 | 0.9768 | Ref |
| MG592560 | Unassigned | Unassigned | Unassigned | 1226_0 | Clustered           | 2 VC_1226_0  | 2  | 0.6497 | 0.86822376 | 0.564  | 0 | 0 | 0 | 1      | Ref |
| MG592561 | Unassigned | Unassigned | Unassigned | 499_0  | Clustered           | 24 VC_499_0  | 24 | 0.8569 | 1          | 0.8569 | 0 | 0 | 0 | 0.9529 | Ref |
| MG592562 | Unassigned | Unassigned | Unassigned | 493_1  | Clustered/Singleton | 1 VC_493_1   | 1  | 0      | 1          | 0      | 0 | 0 | 0 | 1      | Ref |
| MG592563 | Unassigned | Unassigned | Unassigned | 1050_0 | Clustered           | 24 VC_1050_0 | 24 | 0.5274 | 1          | 0.5274 | 0 | 0 | 0 | 1      | Ref |
| MG592564 | Unassigned | Unassigned | Unassigned | 1050_0 | Clustered           | 24 VC_1050_0 | 24 | 0.5274 | 1          | 0.5274 | 0 | 0 | 0 | 1      | Ref |
| MG592565 | Unassigned | Unassigned | Unassigned | 1050_0 | Clustered           | 24 VC_1050_0 | 24 | 0.5274 | 1          | 0.5274 | 0 | 0 | 0 | 1      | Ref |
| MG592566 | Unassigned | Unassigned | Unassigned | 948_0  | Clustered           | 9 VC_948_0   | 9  | 0.5443 | 1          | 0.5443 | 0 | 0 | 0 | 1      | Ref |
| MG592567 | Unassigned | Unassigned | Unassigned | 642_0  | Clustered           | 7 VC_642_0   | 7  | 0.1508 | 1          | 0.1508 | 0 | 0 | 0 | 0.7619 | Ref |
| MG592568 | Unassigned | Unassigned | Unassigned | 642_0  | Clustered           | 7 VC_642_0   | 7  | 0.1508 | 1          | 0.1508 | 0 | 0 | 0 | 0.7619 | Ref |
| MG592569 | Unassigned | Unassigned | Unassigned | 646_0  | Clustered           | 29 VC_646_0  | 29 | 0.9131 | 1          | 0.9131 | 0 | 0 | 0 | 1      | Ref |
| MG592570 | Unassigned | Unassigned | Unassigned | 646_0  | Clustered           | 29 VC_646_0  | 29 | 0.9131 | 1          | 0.9131 | 0 | 0 | 0 | 1      | Ref |
| MG592571 | Unassigned | Unassigned | Unassigned | 1050_0 | Clustered           | 24 VC_1050_0 | 24 | 0.5274 | 1          | 0.5274 | 0 | 0 | 0 | 1      | Ref |
| MG592572 | Unassigned | Unassigned | Unassigned | 499_0  | Clustered           | 24 VC_499_0  | 24 | 0.8569 | 1          | 0.8569 | 0 | 0 | 0 | 0.9529 | Ref |
| MG592573 | Unassigned | Unassigned | Unassigned | 5_0    | Clustered           | 30 VC_5_0    | 30 | 0.9647 | 1          | 0.9647 | 0 | 0 | 0 | 1      | Ref |
| MG592576 | Unassigned | Unassigned | Unassigned | 924_0  | Clustered           | 34 VC_924_0  | 34 | 0.8942 | 1          | 0.8942 | 0 | 0 | 0 | 0.9768 | Ref |
| MG592578 | Unassigned | Unassigned | Unassigned | 175_0  | Clustered           | 4 VC_175_0   | 4  | 0.3847 | 0.99998259 | 0.3846 | 0 | 0 | 0 | 1      | Ref |
| MG592579 | Unassigned | Unassigned | Unassigned | 543_0  | Clustered           | 6 VC_543_0   | 6  | 0.864  | 0.99999948 | 0.864  | 0 | 0 | 0 | 1      | Ref |
| MG592581 | Unassigned | Unassigned | Unassigned | 807_0  | Clustered           | 17 VC_807_0  | 17 | 0.907  | 1          | 0.907  | 0 | 0 | 0 | 1      | Ref |
| MG592582 | Unassigned | Unassigned | Unassigned | 807_0  | Clustered           | 17 VC_807_0  | 17 | 0.907  | 1          | 0.907  | 0 | 0 | 0 | 1      | Ref |
| MG592583 | Unassigned | Unassigned | Unassigned | 642_3  | Clustered           | 9 VC_642_3   | 9  | 0.2131 | 1          | 0.2131 | 0 | 0 | 0 | 0.6944 | Ref |
| MG592584 | Unassigned | Unassigned | Unassigned | 944_0  | Clustered           | 6 VC_944_0   | 6  | 0.8196 | 1          | 0.8196 | 0 | 0 | 0 | 1      | Ref |
| MG592585 | Unassigned | Unassigned | Unassigned | 904_0  | Clustered           | 6 VC_904_0   | 6  | 0.233  | 1          | 0.233  | 0 | 0 | 0 | 1      | Ref |
| MG592586 | Unassigned | Unassigned | Unassigned | 904_0  | Clustered           | 6 VC_904_0   | 6  | 0.233  | 1          | 0.233  | 0 | 0 | 0 | 1      | Ref |
| MG592587 | Unassigned | Unassigned | Unassigned | 642_3  | Clustered           | 9 VC_642_3   | 9  | 0.2131 | 1          | 0.2131 | 0 | 0 | 0 | 0.6944 | Ref |
| MG592588 | Unassigned | Unassigned | Unassigned | 248_0  | Clustered           | 11 VC_248_0  | 11 | 0.7031 | 1          | 0.7031 | 0 | 0 | 0 | 1      | Ref |
| MG592589 | Unassigned | Unassigned | Unassigned | 248_0  | Clustered           | 11 VC_248_0  | 11 | 0.7031 | 1          | 0.7031 | 0 | 0 | 0 | 1      | Ref |
| MG592590 | Unassigned | Unassigned | Unassigned | 499_0  | Clustered           | 24 VC_499_0  | 24 | 0.8569 | 1          | 0.8569 | 0 | 0 | 0 | 0.9529 | Ref |
| MG592591 | Unassigned | Unassigned | Unassigned | 1227_0 | Clustered           | 6 VC_1227_0  | 6  | 0.9303 | 0.99999969 | 0.9303 | 0 | 0 | 0 | 1      | Ref |
| MG592592 | Unassigned | Unassigned | Unassigned | 499_0  | Clustered           | 24 VC_499_0  | 24 | 0.8569 | 1          | 0.8569 | 0 | 0 | 0 | 0.9529 | Ref |
| MG592593 | Unassigned | Unassigned | Unassigned | 924_0  | Clustered           | 34 VC_924_0  | 34 | 0.8942 | 1          | 0.8942 | 0 | 0 | 0 | 0.9768 | Ref |
| MG592594 | Unassigned | Unassigned | Unassigned | 924_0  | Clustered           | 34 VC_924_0  | 34 | 0.8942 | 1          | 0.8942 | 0 | 0 | 0 | 0.9768 | Ref |
| MG592595 | Unassigned | Unassigned | Unassigned | 642_3  | Clustered           | 9 VC_642_3   | 9  | 0.2131 | 1          | 0.2131 | 0 | 0 | 0 | 0.6944 | Ref |
| MG592596 | Unassigned | Unassigned | Unassigned | 1229_0 | Clustered           | 7 VC_1229_0  | 7  | 0.9924 | 0.99999987 | 0.9924 | 0 | 0 | 0 | 1      | Ref |
| MG592597 | Unassigned | Unassigned | Unassigned | 924_0  | Clustered           | 34 VC_924_0  | 34 | 0.8942 | 1          | 0.8942 | 0 | 0 | 0 | 0.9768 | Ref |
| MG592598 | Unassigned | Unassigned | Unassigned | 924_0  | Clustered           | 34 VC_924_0  | 34 | 0.8942 | 1          | 0.8942 | 0 | 0 | 0 | 0.9768 | Ref |
| MG592599 | Unassigned | Unassigned | Unassigned | 757_0  | Clustered           | 2 VC_757_0   | 2  | 0.0727 | 0.95527362 | 0.0695 | 0 | 0 | 0 | 1      | Ref |
| MG592600 | Unassigned | Unassigned | Unassigned | 642_0  | Clustered           | 7 VC_642_0   | 7  | 0.1508 | 1          | 0.1508 | 0 | 0 | 0 | 0.7619 | Ref |
| MG592601 | Unassigned | Unassigned | Unassigned | 1050_1 | Clustered           | 29 VC_1050_1 | 29 | 0.4861 | 1          | 0.4861 | 0 | 0 | 0 | 0.9581 | Ref |
| MG592602 | Unassigned | Unassigned | Unassigned | 1050_1 | Clustered           | 29 VC_1050_1 | 29 | 0.4861 | 1          | 0.4861 | 0 | 0 | 0 | 0.9581 | Ref |
| MG592603 | Unassigned | Unassigned | Unassigned | 782_0  | Clustered           | 3 VC_782_0   | 3  | 0.296  | 0.99856285 | 0.2956 | 0 | 0 | 0 | 1      | Ref |



|          |            |            |            |        |                     |               |     |        |            |        |   |   |   |            |
|----------|------------|------------|------------|--------|---------------------|---------------|-----|--------|------------|--------|---|---|---|------------|
| MG592604 | Unassigned | Unassigned | Unassigned | 782_0  | Clustered           | 3 VC_782_0    | 3   | 0.296  | 0.99856285 | 0.2956 | 0 | 0 | 0 | 1 Ref      |
| MG592605 | Unassigned | Unassigned | Unassigned | 924_0  | Clustered           | 34 VC_924_0   | 34  | 0.8942 | 1          | 0.8942 | 0 | 0 | 0 | 0.9768 Ref |
| MG592606 | Unassigned | Unassigned | Unassigned | 924_0  | Clustered           | 34 VC_924_0   | 34  | 0.8942 | 1          | 0.8942 | 0 | 0 | 0 | 0.9768 Ref |
| MG592607 | Unassigned | Unassigned | Unassigned | 924_0  | Clustered           | 34 VC_924_0   | 34  | 0.8942 | 1          | 0.8942 | 0 | 0 | 0 | 0.9768 Ref |
| MG592608 | Unassigned | Unassigned | Unassigned | 646_0  | Clustered           | 29 VC_646_0   | 29  | 0.9131 | 1          | 0.9131 | 0 | 0 | 0 | 1 Ref      |
| MG592609 | Unassigned | Unassigned | Unassigned | 135_0  | Clustered           | 2 VC_135_0    | 2   | 0.0302 | 0.95557467 | 0.0288 | 0 | 0 | 0 | 1 Ref      |
| MG592610 | Unassigned | Unassigned | Unassigned | 782_0  | Clustered           | 3 VC_782_0    | 3   | 0.296  | 0.99856285 | 0.2956 | 0 | 0 | 0 | 1 Ref      |
| MG592611 | Unassigned | Unassigned | Unassigned | 499_0  | Clustered           | 24 VC_499_0   | 24  | 0.8569 | 1          | 0.8569 | 0 | 0 | 0 | 0.9529 Ref |
| MG592612 | Unassigned | Unassigned | Unassigned | 944_0  | Clustered           | 6 VC_944_0    | 6   | 0.8196 | 1          | 0.8196 | 0 | 0 | 0 | 1 Ref      |
| MG592613 | Unassigned | Unassigned | Unassigned | 944_0  | Clustered           | 6 VC_944_0    | 6   | 0.8196 | 1          | 0.8196 | 0 | 0 | 0 | 1 Ref      |
| MG592614 | Unassigned | Unassigned | Unassigned | 646_0  | Clustered           | 29 VC_646_0   | 29  | 0.9131 | 1          | 0.9131 | 0 | 0 | 0 | 1 Ref      |
| MG592617 | Unassigned | Unassigned | Unassigned | 1050_1 | Clustered           | 29 VC_1050_1  | 29  | 0.4861 | 1          | 0.4861 | 0 | 0 | 0 | 0.9581 Ref |
| MG592618 | Unassigned | Unassigned | Unassigned | 1050_1 | Clustered           | 29 VC_1050_1  | 29  | 0.4861 | 1          | 0.4861 | 0 | 0 | 0 | 0.9581 Ref |
| MG592619 | Unassigned | Unassigned | Unassigned | 757_0  | Clustered           | 2 VC_757_0    | 2   | 0.0727 | 0.95527362 | 0.0695 | 0 | 0 | 0 | 1 Ref      |
| MG592620 | Unassigned | Unassigned | Unassigned | 501_0  | Clustered           | 16 VC_501_0   | 16  | 0.9985 | 1          | 0.9985 | 0 | 0 | 0 | 1 Ref      |
| MG592621 | Unassigned | Unassigned | Unassigned | 135_0  | Clustered           | 2 VC_135_0    | 2   | 0.0302 | 0.95557467 | 0.0288 | 0 | 0 | 0 | 1 Ref      |
| MG592622 | Unassigned | Unassigned | Unassigned | 646_0  | Clustered           | 29 VC_646_0   | 29  | 0.9131 | 1          | 0.9131 | 0 | 0 | 0 | 1 Ref      |
| MG592623 | Unassigned | Unassigned | Unassigned | 501_0  | Clustered           | 16 VC_501_0   | 16  | 0.9985 | 1          | 0.9985 | 0 | 0 | 0 | 1 Ref      |
| MG592625 | Unassigned | Unassigned | Unassigned | 1227_0 | Clustered           | 6 VC_1227_0   | 6   | 0.9303 | 0.99999969 | 0.9303 | 0 | 0 | 0 | 1 Ref      |
| MG592626 | Unassigned | Unassigned | Unassigned | 530_0  | Clustered           | 9 VC_530_0    | 9   | 0.8027 | 1          | 0.8027 | 0 | 0 | 0 | 1 Ref      |
| MG592627 | Unassigned | Unassigned | Unassigned | 646_0  | Clustered           | 29 VC_646_0   | 29  | 0.9131 | 1          | 0.9131 | 0 | 0 | 0 | 1 Ref      |
| MG592628 | Unassigned | Unassigned | Unassigned | 646_0  | Clustered           | 29 VC_646_0   | 29  | 0.9131 | 1          | 0.9131 | 0 | 0 | 0 | 1 Ref      |
| MG592629 | Unassigned | Unassigned | Unassigned | 758_0  | Clustered           | 18 VC_758_0   | 18  | 0.738  | 1          | 0.738  | 0 | 0 | 0 | 1 Ref      |
| MG592630 | Unassigned | Unassigned | Unassigned | 642_0  | Clustered           | 7 VC_642_0    | 7   | 0.1508 | 1          | 0.1508 | 0 | 0 | 0 | 0.7619 Ref |
| MG592631 | Unassigned | Unassigned | Unassigned | 924_0  | Clustered           | 34 VC_924_0   | 34  | 0.8942 | 1          | 0.8942 | 0 | 0 | 0 | 0.9768 Ref |
| MG592632 | Unassigned | Unassigned | Unassigned | 1050_0 | Clustered           | 24 VC_1050_0  | 24  | 0.5274 | 1          | 0.5274 | 0 | 0 | 0 | 1 Ref      |
| MG592633 | Unassigned | Unassigned | Unassigned | 1050_0 | Clustered           | 24 VC_1050_0  | 24  | 0.5274 | 1          | 0.5274 | 0 | 0 | 0 | 1 Ref      |
| MG592634 | Unassigned | Unassigned | Unassigned | 1050_0 | Clustered           | 24 VC_1050_0  | 24  | 0.5274 | 1          | 0.5274 | 0 | 0 | 0 | 1 Ref      |
| MG592635 | Unassigned | Unassigned | Unassigned | 1050_0 | Clustered           | 24 VC_1050_0  | 24  | 0.5274 | 1          | 0.5274 | 0 | 0 | 0 | 1 Ref      |
| MG592636 | Unassigned | Unassigned | Unassigned | 1050_0 | Clustered           | 24 VC_1050_0  | 24  | 0.5274 | 1          | 0.5274 | 0 | 0 | 0 | 1 Ref      |
| MG592637 | Unassigned | Unassigned | Unassigned | 1050_0 | Clustered           | 24 VC_1050_0  | 24  | 0.5274 | 1          | 0.5274 | 0 | 0 | 0 | 1 Ref      |
| MG592638 | Unassigned | Unassigned | Unassigned | 1050_0 | Clustered           | 24 VC_1050_0  | 24  | 0.5274 | 1          | 0.5274 | 0 | 0 | 0 | 1 Ref      |
| MG592639 | Unassigned | Unassigned | Unassigned | 1050_0 | Clustered           | 24 VC_1050_0  | 24  | 0.5274 | 1          | 0.5274 | 0 | 0 | 0 | 1 Ref      |
| MG592640 | Unassigned | Unassigned | Unassigned | 1050_0 | Clustered           | 24 VC_1050_0  | 24  | 0.5274 | 1          | 0.5274 | 0 | 0 | 0 | 1 Ref      |
| MG592641 | Unassigned | Unassigned | Unassigned | 646_0  | Clustered           | 29 VC_646_0   | 29  | 0.9131 | 1          | 0.9131 | 0 | 0 | 0 | 1 Ref      |
| MG592642 | Unassigned | Unassigned | Unassigned | 1050_0 | Clustered           | 24 VC_1050_0  | 24  | 0.5274 | 1          | 0.5274 | 0 | 0 | 0 | 1 Ref      |
| MG592644 | Unassigned | Unassigned | Unassigned | 642_3  | Clustered           | 9 VC_642_3    | 9   | 0.2131 | 1          | 0.2131 | 0 | 0 | 0 | 0.6944 Ref |
| MG592645 | Unassigned | Unassigned | Unassigned | 1050_0 | Clustered           | 24 VC_1050_0  | 24  | 0.5274 | 1          | 0.5274 | 0 | 0 | 0 | 1 Ref      |
| MG592646 | Unassigned | Unassigned | Unassigned | 1050_0 | Clustered           | 24 VC_1050_0  | 24  | 0.5274 | 1          | 0.5274 | 0 | 0 | 0 | 1 Ref      |
| MG592647 | Unassigned | Unassigned | Unassigned | 646_0  | Clustered           | 29 VC_646_0   | 29  | 0.9131 | 1          | 0.9131 | 0 | 0 | 0 | 1 Ref      |
| MG592648 | Unassigned | Unassigned | Unassigned | 1050_0 | Clustered           | 24 VC_1050_0  | 24  | 0.5274 | 1          | 0.5274 | 0 | 0 | 0 | 1 Ref      |
| MG592649 | Unassigned | Unassigned | Unassigned | 1050_0 | Clustered           | 24 VC_1050_0  | 24  | 0.5274 | 1          | 0.5274 | 0 | 0 | 0 | 1 Ref      |
| MG592650 | Unassigned | Unassigned | Unassigned | 1050_0 | Clustered           | 24 VC_1050_0  | 24  | 0.5274 | 1          | 0.5274 | 0 | 0 | 0 | 1 Ref      |
| MG592651 | Unassigned | Unassigned | Unassigned | 1050_0 | Clustered           | 24 VC_1050_0  | 24  | 0.5274 | 1          | 0.5274 | 0 | 0 | 0 | 1 Ref      |
| MG592652 | Unassigned | Unassigned | Unassigned | 1050_0 | Clustered           | 24 VC_1050_0  | 24  | 0.5274 | 1          | 0.5274 | 0 | 0 | 0 | 1 Ref      |
| MG592653 | Unassigned | Unassigned | Unassigned | 1050_0 | Clustered           | 24 VC_1050_0  | 24  | 0.5274 | 1          | 0.5274 | 0 | 0 | 0 | 1 Ref      |
| MG592654 | Unassigned | Unassigned | Unassigned | 948_0  | Clustered           | 9 VC_948_0    | 9   | 0.5443 | 1          | 0.5443 | 0 | 0 | 0 | 1 Ref      |
| MG592655 | Unassigned | Unassigned | Unassigned | 1050_1 | Clustered           | 29 VC_1050_1  | 29  | 0.4861 | 1          | 0.4861 | 0 | 0 | 0 | 0.9581 Ref |
| MG592656 | Unassigned | Unassigned | Unassigned | 646_0  | Clustered           | 29 VC_646_0   | 29  | 0.9131 | 1          | 0.9131 | 0 | 0 | 0 | 1 Ref      |
| MG592657 | Unassigned | Unassigned | Unassigned | 948_0  | Clustered           | 9 VC_948_0    | 9   | 0.5443 | 1          | 0.5443 | 0 | 0 | 0 | 1 Ref      |
| MG592658 | Unassigned | Unassigned | Unassigned | 948_0  | Clustered           | 9 VC_948_0    | 9   | 0.5443 | 1          | 0.5443 | 0 | 0 | 0 | 1 Ref      |
| MG592659 | Unassigned | Unassigned | Unassigned | 948_0  | Clustered           | 9 VC_948_0    | 9   | 0.5443 | 1          | 0.5443 | 0 | 0 | 0 | 1 Ref      |
| MG592660 | Unassigned | Unassigned | Unassigned | 175_0  | Clustered           | 4 VC_175_0    | 4   | 0.3847 | 0.99998259 | 0.3846 | 0 | 0 | 0 | 1 Ref      |
| MG592661 | Unassigned | Unassigned | Unassigned | 1041_0 | Clustered           | 9 VC_1041_0   | 9   | 0.6541 | 1          | 0.6541 | 0 | 0 | 0 | 1 Ref      |
| MG592662 | Unassigned | Unassigned | Unassigned | 902_0  | Clustered           | 3 VC_902_0    | 3   | 0.9978 | 0.87589346 | 0.8739 | 0 | 0 | 0 | 1 Ref      |
| MG592664 | Unassigned | Unassigned | Unassigned | 642_5  | Clustered           | 4 VC_642_5    | 4   | 0.0902 | 0.99996664 | 0.0902 | 0 | 0 | 0 | 1 Ref      |
| MG592665 | Unassigned | Unassigned | Unassigned | 642_5  | Clustered           | 4 VC_642_5    | 4   | 0.0902 | 0.99996664 | 0.0902 | 0 | 0 | 0 | 1 Ref      |
| MG592666 | Unassigned | Unassigned | Unassigned | 827_0  | Clustered           | 6 VC_827_0    | 6   | 0.7493 | 1          | 0.7493 | 0 | 0 | 0 | 1 Ref      |
| MG592668 | Unassigned | Unassigned | Unassigned | 930_0  | Clustered           | 7 VC_930_0    | 7   | 0.519  | 1          | 0.519  | 0 | 0 | 0 | 1 Ref      |
| MG592669 | Unassigned | Unassigned | Unassigned | 248_0  | Clustered           | 11 VC_248_0   | 11  | 0.7031 | 1          | 0.7031 | 0 | 0 | 0 | 1 Ref      |
| MG592670 | Unassigned | Unassigned | Unassigned | 248_0  | Clustered           | 11 VC_248_0   | 11  | 0.7031 | 1          | 0.7031 | 0 | 0 | 0 | 1 Ref      |
| MG592671 | Unassigned | Unassigned | Unassigned | 164_9  | Clustered/Singleton | 1 VC_164_9    | 1   | 0      | 1          | 0      | 0 | 0 | 0 | 1 Ref      |
| MG592672 | Unassigned | Unassigned | Unassigned | 902_0  | Clustered           | 3 VC_902_0    | 3   | 0.9978 | 0.87589346 | 0.8739 | 0 | 0 | 0 | 1 Ref      |
| MG593800 | Unassigned | Unassigned | Unassigned | 375_0  | Clustered           | 3 VC_375_0    | 3   | 0.2479 | 0.99807286 | 0.2474 | 0 | 0 | 0 | 1 Ref      |
| MG593802 | Unassigned | Unassigned | Unassigned | 981_1  | Clustered           | 26 VC_981_1   | 26  | 0.7009 | 1          | 0.7009 | 0 | 0 | 0 | 1 Ref      |
| MG593803 | Unassigned | Unassigned | Unassigned | 375_0  | Clustered           | 3 VC_375_0    | 3   | 0.2479 | 0.99807286 | 0.2474 | 0 | 0 | 0 | 1 Ref      |
| MG596799 | Unassigned | Unassigned | Unassigned | 1030_0 | Clustered           | 3 VC_1030_0   | 3   | 0.7895 | 0.99542416 | 0.7859 | 0 | 0 | 0 | 1 Ref      |
| MG596800 | Unassigned | Unassigned | Unassigned | 965_0  | Clustered           | 2 VC_965_0    | 2   | 0.2408 | 0.95689931 | 0.2304 | 0 | 0 | 0 | 1 Ref      |
| MG599035 | Unassigned | Unassigned | Unassigned | 699_0  | Clustered           | 71 VC_699_0   | 71  | 0.9352 | 1          | 0.9352 | 0 | 0 | 0 | 1 Ref      |
| MG602476 | Unassigned | Unassigned | Unassigned | 882_0  | Clustered           | 20 VC_882_0   | 20  | 0.9917 | 1          | 0.9917 | 0 | 0 | 0 | 1 Ref      |
| MG602477 | Unassigned | Unassigned | Unassigned | 187_3  | Clustered           | 9 VC_187_3    | 9   | 0.1971 | 1          | 0.1971 | 0 | 0 | 0 | 0.8611 Ref |
| MG640035 | Unassigned | Unassigned | Unassigned | 909_0  | Clustered           | 5 VC_909_0    | 5   | 0.7406 | 0.9999861  | 0.7406 | 0 | 0 | 0 | 1 Ref      |
| MG641179 | Unassigned | Unassigned | Unassigned | 1104_0 | Clustered           | 154 VC_1104_0 | 154 | 0.8484 | 1          | 0.8484 | 0 | 0 | 0 | 1 Ref      |
| MG641180 | Unassigned | Unassigned | Unassigned | 1104_0 | Clustered           | 154 VC_1104_0 | 154 | 0.8484 | 1          | 0.8484 | 0 | 0 | 0 | 1 Ref      |
| MG641183 | Unassigned | Unassigned | Unassigned | 197_0  | Clustered           | 5 VC_197_0    | 5   | 0.1324 | 0.84698401 | 0.1122 | 0 | 0 | 0 | 1 Ref      |
| MG641184 | Unassigned | Unassigned | Unassigned | 1133_0 | Clustered           | 4 VC_1133_0   | 4   | 0.1253 | 0.975067   | 0.1222 | 0 | 0 | 0 | 1 Ref      |
| MG641185 | Unassigned | Unassigned | Unassigned | 1232_0 | Clustered           | 2 VC_1232_0   | 2   | 0.4709 | 0.85557782 | 0.4029 | 0 | 0 | 0 | 1 Ref      |
| MG641186 | Unassigned | Unassigned | Unassigned | 1104_0 | Clustered           | 154 VC_1104_0 | 154 | 0.8484 | 1          | 0.8484 | 0 | 0 | 0 | 1 Ref      |
| MG641188 | Unassigned | Unassigned | Unassigned | 1233_0 | Clustered           | 16 VC_1233_0  | 16  | 0.8971 | 1          | 0.8971 | 0 | 0 | 0 | 1 Ref      |
| MG646668 | Unassigned | Unassigned | Unassigned | 637_0  | Clustered           | 115 VC_637_0  | 115 | 0.731  | 1          | 0.731  | 0 | 0 | 0 | 0.8764 Ref |
| MG646669 | Unassigned | Unassigned | Unassigned | 329_11 | Clustered           | 15 VC_329_11  | 15  | 0.0791 | 1          | 0.0791 | 0 | 0 | 0 | 0.9333 Ref |



|          |            |            |            |        |                     |              |     |        |            |        |   |   |   |        |     |
|----------|------------|------------|------------|--------|---------------------|--------------|-----|--------|------------|--------|---|---|---|--------|-----|
| MG646670 | Unassigned | Unassigned | Unassigned | 329_11 | Clustered           | 15 VC_329_11 | 15  | 0.0791 | 1          | 0.0791 | 0 | 0 | 0 | 0.9333 | Ref |
| MG646671 | Unassigned | Unassigned | Unassigned | 329_11 | Clustered           | 15 VC_329_11 | 15  | 0.0791 | 1          | 0.0791 | 0 | 0 | 0 | 0.9333 | Ref |
| MG646672 | Unassigned | Unassigned | Unassigned | 329_0  | Clustered           | 2 VC_329_0   | 2   | 0.0051 | 0.95464582 | 0.0048 | 0 | 0 | 0 | 1      | Ref |
| MG649966 | Unassigned | Unassigned | Unassigned | 971_1  | Clustered           | 24 VC_971_1  | 24  | 0.7393 | 1          | 0.7393 | 0 | 0 | 0 | 0.8913 | Ref |
| MG649967 | Unassigned | Unassigned | Unassigned | 971_1  | Clustered           | 24 VC_971_1  | 24  | 0.7393 | 1          | 0.7393 | 0 | 0 | 0 | 0.8913 | Ref |
| MG655267 | Unassigned | Unassigned | Unassigned | 489_1  | Clustered           | 11 VC_489_1  | 11  | 0.4621 | 1          | 0.4621 | 0 | 0 | 0 | 1      | Ref |
| MG655268 | Unassigned | Unassigned | Unassigned | 489_1  | Clustered           | 11 VC_489_1  | 11  | 0.4621 | 1          | 0.4621 | 0 | 0 | 0 | 1      | Ref |
| MG655269 | Unassigned | Unassigned | Unassigned | 489_1  | Clustered           | 11 VC_489_1  | 11  | 0.4621 | 1          | 0.4621 | 0 | 0 | 0 | 1      | Ref |
| MG655270 | Unassigned | Unassigned | Unassigned | 489_1  | Clustered           | 11 VC_489_1  | 11  | 0.4621 | 1          | 0.4621 | 0 | 0 | 0 | 1      | Ref |
| MG656408 | Unassigned | Unassigned | Unassigned | 149_8  | Clustered           | 66 VC_149_8  | 66  | 0.4565 | 1          | 0.4565 | 0 | 0 | 0 | 0.8182 | Ref |
| MG663582 | Unassigned | Unassigned | Unassigned | 1224_0 | Clustered           | 19 VC_1224_0 | 19  | 1      | 1          | 1      | 0 | 0 | 0 | 1      | Ref |
| MG663583 | Unassigned | Unassigned | Unassigned | 1224_0 | Clustered           | 19 VC_1224_0 | 19  | 1      | 1          | 1      | 0 | 0 | 0 | 1      | Ref |
| MG663584 | Unassigned | Unassigned | Unassigned | 1224_0 | Clustered           | 19 VC_1224_0 | 19  | 1      | 1          | 1      | 0 | 0 | 0 | 1      | Ref |
| MG663585 | Unassigned | Unassigned | Unassigned | 1224_0 | Clustered           | 19 VC_1224_0 | 19  | 1      | 1          | 1      | 0 | 0 | 0 | 1      | Ref |
| MG663586 | Unassigned | Unassigned | Unassigned | 1224_0 | Clustered           | 19 VC_1224_0 | 19  | 1      | 1          | 1      | 0 | 0 | 0 | 1      | Ref |
| MG670586 | Unassigned | Unassigned | Unassigned | 1234_0 | Clustered           | 44 VC_1234_0 | 44  | 1      | 1          | 1      | 0 | 0 | 0 | 1      | Ref |
| MG673519 | Unassigned | Unassigned | Unassigned | 813_1  | Clustered           | 24 VC_813_1  | 24  | 0.535  | 1          | 0.535  | 0 | 0 | 0 | 1      | Ref |
| MG674163 | Unassigned | Unassigned | Unassigned | 608_0  | Clustered           | 5 VC_608_0   | 5   | 0.4331 | 0.99999996 | 0.4331 | 0 | 0 | 0 | 1      | Ref |
| MG676223 | Unassigned | Unassigned | Unassigned | 642_2  | Clustered           | 6 VC_642_2   | 6   | 0.1679 | 1          | 0.1679 | 0 | 0 | 0 | 1      | Ref |
| MG676224 | Unassigned | Unassigned | Unassigned | 195_0  | Clustered           | 2 VC_195_0   | 2   | 0.1201 | 0.95680007 | 0.1149 | 0 | 0 | 0 | 1      | Ref |
| MG676225 | Unassigned | Unassigned | Unassigned | 195_0  | Clustered           | 2 VC_195_0   | 2   | 0.1201 | 0.95680007 | 0.1149 | 0 | 0 | 0 | 1      | Ref |
| MG676466 | Unassigned | Unassigned | Unassigned | 755_0  | Clustered           | 9 VC_755_0   | 9   | 0.4489 | 1          | 0.4489 | 0 | 0 | 0 | 1      | Ref |
| MG696114 | Unassigned | Unassigned | Unassigned | 288_2  | Clustered           | 2 VC_288_2   | 2   | 0.0228 | 0.95538559 | 0.0218 | 0 | 0 | 0 | 1      | Ref |
| MG707188 | Unassigned | Unassigned | Unassigned | 173_0  | Clustered           | 2 VC_173_0   | 2   | 0.0799 | 0.95489091 | 0.0763 | 0 | 0 | 0 | 1      | Ref |
| MG708273 | Unassigned | Unassigned | Unassigned | 252_0  | Clustered           | 121 VC_252_0 | 121 | 0.7376 | 1          | 0.7376 | 0 | 0 | 0 | 0.9999 | Ref |
| MG708274 | Unassigned | Unassigned | Unassigned | 252_0  | Clustered           | 121 VC_252_0 | 121 | 0.7376 | 1          | 0.7376 | 0 | 0 | 0 | 0.9999 | Ref |
| MG708275 | Unassigned | Unassigned | Unassigned | 252_0  | Clustered           | 121 VC_252_0 | 121 | 0.7376 | 1          | 0.7376 | 0 | 0 | 0 | 0.9999 | Ref |
| MG708276 | Unassigned | Unassigned | Unassigned | 695_0  | Clustered           | 48 VC_695_0  | 48  | 0.8162 | 1          | 0.8162 | 0 | 0 | 0 | 1      | Ref |
| MG710528 | Unassigned | Unassigned | Unassigned | 42_0   | Clustered           | 49 VC_42_0   | 49  | 0.4517 | 1          | 0.4517 | 0 | 0 | 0 | 0.8597 | Ref |
| MG711460 | Unassigned | Unassigned | Unassigned | 1235_0 | Clustered           | 12 VC_1235_0 | 12  | 0.7997 | 1          | 0.7997 | 0 | 0 | 0 | 1      | Ref |
| MG711461 | Unassigned | Unassigned | Unassigned | 717_0  | Clustered           | 7 VC_717_0   | 7   | 0.5813 | 1          | 0.5813 | 0 | 0 | 0 | 0.9048 | Ref |
| MG711462 | Unassigned | Unassigned | Unassigned | 707_1  | Clustered           | 9 VC_707_1   | 9   | 0.2702 | 1          | 0.2702 | 0 | 0 | 0 | 0.8889 | Ref |
| MG711463 | Unassigned | Unassigned | Unassigned | 804_0  | Clustered           | 2 VC_804_0   | 2   | 0.0559 | 0.95690755 | 0.0535 | 0 | 0 | 0 | 1      | Ref |
| MG711464 | Unassigned | Unassigned | Unassigned | 621_0  | Clustered           | 7 VC_621_0   | 7   | 0.5783 | 1          | 0.5783 | 0 | 0 | 0 | 1      | Ref |
| MG711465 | Unassigned | Unassigned | Unassigned | 606_0  | Clustered           | 4 VC_606_0   | 4   | 0.4507 | 0.99995146 | 0.4507 | 0 | 0 | 0 | 1      | Ref |
| MG711466 | Unassigned | Unassigned | Unassigned | 710_0  | Clustered           | 10 VC_710_0  | 10  | 0.2446 | 1          | 0.2446 | 0 | 0 | 0 | 0.8222 | Ref |
| MG711467 | Unassigned | Unassigned | Unassigned | 711_0  | Clustered           | 3 VC_711_0   | 3   | 0.2312 | 0.99842495 | 0.2309 | 0 | 0 | 0 | 1      | Ref |
| MG720309 | Unassigned | Unassigned | Unassigned | 904_0  | Clustered           | 6 VC_904_0   | 6   | 0.233  | 1          | 0.233  | 0 | 0 | 0 | 1      | Ref |
| MG721208 | Unassigned | Unassigned | Unassigned | 149_21 | Clustered/Singleton | 1 VC_149_21  | 1   | 0      | 1          | 0      | 0 | 0 | 0 | 1      | Ref |
| MG727695 | Unassigned | Unassigned | Unassigned | 708_0  | Clustered           | 47 VC_708_0  | 47  | 0.8654 | 1          | 0.8654 | 0 | 0 | 0 | 1      | Ref |
| MG727696 | Unassigned | Unassigned | Unassigned | 708_0  | Clustered           | 47 VC_708_0  | 47  | 0.8654 | 1          | 0.8654 | 0 | 0 | 0 | 1      | Ref |
| MG727698 | Unassigned | Unassigned | Unassigned | 708_0  | Clustered           | 47 VC_708_0  | 47  | 0.8654 | 1          | 0.8654 | 0 | 0 | 0 | 1      | Ref |
| MG727699 | Unassigned | Unassigned | Unassigned | 708_0  | Clustered           | 47 VC_708_0  | 47  | 0.8654 | 1          | 0.8654 | 0 | 0 | 0 | 1      | Ref |
| MG727700 | Unassigned | Unassigned | Unassigned | 708_0  | Clustered           | 47 VC_708_0  | 47  | 0.8654 | 1          | 0.8654 | 0 | 0 | 0 | 1      | Ref |
| MG727701 | Unassigned | Unassigned | Unassigned | 708_0  | Clustered           | 47 VC_708_0  | 47  | 0.8654 | 1          | 0.8654 | 0 | 0 | 0 | 1      | Ref |
| MG727702 | Unassigned | Unassigned | Unassigned | 708_0  | Clustered           | 47 VC_708_0  | 47  | 0.8654 | 1          | 0.8654 | 0 | 0 | 0 | 1      | Ref |
| MG736918 | Unassigned | Unassigned | Unassigned | 453_0  | Clustered           | 6 VC_453_0   | 6   | 0.114  | 1          | 0.114  | 0 | 0 | 0 | 1      | Ref |
| MG744354 | Unassigned | Unassigned | Unassigned | 634_1  | Clustered           | 6 VC_634_1   | 6   | 0.4228 | 1          | 0.4228 | 0 | 0 | 0 | 1      | Ref |
| MG747435 | Unassigned | Unassigned | Unassigned | 1_0    | Clustered           | 54 VC_1_0    | 54  | 0.8527 | 1          | 0.8527 | 0 | 0 | 0 | 1      | Ref |
| MG748547 | Unassigned | Unassigned | Unassigned | 133_5  | Clustered/Singleton | 1 VC_133_5   | 1   | 0      | 1          | 0      | 0 | 0 | 0 | 1      | Ref |
| MG748548 | Unassigned | Unassigned | Unassigned | 813_1  | Clustered           | 24 VC_813_1  | 24  | 0.535  | 1          | 0.535  | 0 | 0 | 0 | 1      | Ref |
| MG751100 | Unassigned | Unassigned | Unassigned | 491_0  | Clustered           | 36 VC_491_0  | 36  | 0.5336 | 1          | 0.5336 | 0 | 0 | 0 | 0.9714 | Ref |
| MG757152 | Unassigned | Unassigned | Unassigned | 868_0  | Clustered           | 25 VC_868_0  | 25  | 0.5791 | 1          | 0.5791 | 0 | 0 | 0 | 1      | Ref |
| MG757153 | Unassigned | Unassigned | Unassigned | 1072_0 | Clustered           | 2 VC_1072_0  | 2   | 0.0264 | 0.95117401 | 0.0251 | 0 | 0 | 0 | 1      | Ref |
| MG757154 | Unassigned | Unassigned | Unassigned | 872_0  | Clustered           | 31 VC_872_0  | 31  | 0.8151 | 1          | 0.8151 | 0 | 0 | 0 | 0.8194 | Ref |
| MG757155 | Unassigned | Unassigned | Unassigned | 868_0  | Clustered           | 25 VC_868_0  | 25  | 0.5791 | 1          | 0.5791 | 0 | 0 | 0 | 1      | Ref |
| MG757156 | Unassigned | Unassigned | Unassigned | 571_0  | Clustered           | 4 VC_571_0   | 4   | 0.1921 | 0.99998591 | 0.1921 | 0 | 0 | 0 | 1      | Ref |
| MG757157 | Unassigned | Unassigned | Unassigned | 767_0  | Clustered           | 34 VC_767_0  | 34  | 0.9173 | 1          | 0.9173 | 0 | 0 | 0 | 1      | Ref |
| MG757158 | Unassigned | Unassigned | Unassigned | 371_16 | Clustered           | 42 VC_371_16 | 42  | 0.1341 | 1          | 0.1341 | 0 | 0 | 0 | 0.7282 | Ref |
| MG757159 | Unassigned | Unassigned | Unassigned | 371_11 | Clustered           | 31 VC_371_11 | 31  | 0.0927 | 1          | 0.0927 | 0 | 0 | 0 | 0.7011 | Ref |
| MG757160 | Unassigned | Unassigned | Unassigned | 551_6  | Clustered           | 22 VC_551_6  | 22  | 0.1214 | 1          | 0.1214 | 0 | 0 | 0 | 0.8095 | Ref |
| MG757161 | Unassigned | Unassigned | Unassigned | 514_0  | Clustered           | 75 VC_514_0  | 75  | 0.9402 | 1          | 0.9402 | 0 | 0 | 0 | 1      | Ref |
| MG757162 | Unassigned | Unassigned | Unassigned | 508_0  | Clustered           | 32 VC_508_0  | 32  | 0.906  | 1          | 0.906  | 0 | 0 | 0 | 1      | Ref |
| MG757163 | Unassigned | Unassigned | Unassigned | 982_0  | Clustered           | 62 VC_982_0  | 62  | 0.8646 | 1          | 0.8646 | 0 | 0 | 0 | 0.743  | Ref |
| MG757164 | Unassigned | Unassigned | Unassigned | 371_13 | Clustered           | 33 VC_371_13 | 33  | 0.179  | 1          | 0.179  | 0 | 0 | 0 | 0.8769 | Ref |
| MG757165 | Unassigned | Unassigned | Unassigned | 371_13 | Clustered           | 33 VC_371_13 | 33  | 0.179  | 1          | 0.179  | 0 | 0 | 0 | 0.8769 | Ref |
| MG757166 | Unassigned | Unassigned | Unassigned | 767_0  | Clustered           | 34 VC_767_0  | 34  | 0.9173 | 1          | 0.9173 | 0 | 0 | 0 | 1      | Ref |
| MG757167 | Unassigned | Unassigned | Unassigned | 939_0  | Clustered           | 15 VC_939_0  | 15  | 1      | 0          | 0      | 0 | 0 | 0 | 1      | Ref |
| MG763894 | Unassigned | Unassigned | Unassigned | 884_0  | Clustered           | 28 VC_884_0  | 28  | 0.6211 | 1          | 0.6211 | 0 | 0 | 0 | 0.9841 | Ref |
| MG765274 | Unassigned | Unassigned | Unassigned | 634_1  | Clustered           | 6 VC_634_1   | 6   | 0.4228 | 1          | 0.4228 | 0 | 0 | 0 | 1      | Ref |
| MG765275 | Unassigned | Unassigned | Unassigned | 577_0  | Clustered           | 6 VC_577_0   | 6   | 0.9267 | 0.99999993 | 0.9267 | 0 | 0 | 0 | 1      | Ref |
| MG765276 | Unassigned | Unassigned | Unassigned | 634_0  | Clustered           | 3 VC_634_0   | 3   | 0.2046 | 0.99837593 | 0.2043 | 0 | 0 | 0 | 1      | Ref |
| MG765277 | Unassigned | Unassigned | Unassigned | 526_0  | Clustered           | 6 VC_526_0   | 6   | 0.4386 | 1          | 0.4386 | 0 | 0 | 0 | 1      | Ref |
| MG765278 | Unassigned | Unassigned | Unassigned | 577_0  | Clustered           | 6 VC_577_0   | 6   | 0.9267 | 0.99999993 | 0.9267 | 0 | 0 | 0 | 1      | Ref |
| MG765279 | Unassigned | Unassigned | Unassigned | 526_0  | Clustered           | 6 VC_526_0   | 6   | 0.4386 | 1          | 0.4386 | 0 | 0 | 0 | 1      | Ref |
| MG766218 | Unassigned | Unassigned | Unassigned | 96_0   | Clustered           | 30 VC_96_0   | 30  | 0.718  | 1          | 0.718  | 0 | 0 | 0 | 1      | Ref |
| MG766219 | Unassigned | Unassigned | Unassigned | 96_0   | Clustered           | 30 VC_96_0   | 30  | 0.718  | 1          | 0.718  | 0 | 0 | 0 | 1      | Ref |
| MG770211 | Unassigned | Unassigned | Unassigned | 868_0  | Clustered           | 25 VC_868_0  | 25  | 0.5791 | 1          | 0.5791 | 0 | 0 | 0 | 1      | Ref |
| MG770212 | Unassigned | Unassigned | Unassigned | 371_15 | Clustered           | 44 VC_371_15 | 44  | 0.1391 | 1          | 0.1391 | 0 | 0 | 0 | 0.7474 | Ref |
| MG770214 | Unassigned | Unassigned | Unassigned | 868_0  | Clustered           | 25 VC_868_0  | 25  | 0.5791 | 1          | 0.5791 | 0 | 0 | 0 | 1      | Ref |
| MG770215 | Unassigned | Unassigned | Unassigned | 919_0  | Clustered           | 39 VC_919_0  | 39  | 0.9069 | 1          | 0.9069 | 0 | 0 | 0 | 1      | Ref |



|          |            |            |            |         |                     |               |     |        |            |        |   |   |   |            |
|----------|------------|------------|------------|---------|---------------------|---------------|-----|--------|------------|--------|---|---|---|------------|
| MG770216 | Unassigned | Unassigned | Unassigned | 809_0   | Clustered           | 2 VC_809_0    | 2   | 0.1799 | 0.96299906 | 0.1733 | 0 | 0 | 0 | 1 Ref      |
| MG770228 | Unassigned | Unassigned | Unassigned | 779_0   | Clustered           | 37 VC_779_0   | 37  | 0.5682 | 1          | 0.5682 | 0 | 0 | 0 | 1 Ref      |
| MG770379 | Unassigned | Unassigned | Unassigned | 132_1   | Clustered           | 17 VC_132_1   | 17  | 0.1738 | 1          | 0.1738 | 0 | 0 | 0 | 0.9853 Ref |
| MG770897 | Unassigned | Unassigned | Unassigned | 8_0     | Clustered           | 58 VC_8_0     | 58  | 0.8306 | 1          | 0.8306 | 0 | 0 | 0 | 0.9946 Ref |
| MG775042 | Unassigned | Unassigned | Unassigned | 452_0   | Clustered           | 66 VC_452_0   | 66  | 0.9248 | 1          | 0.9248 | 0 | 0 | 0 | 1 Ref      |
| MG775043 | Unassigned | Unassigned | Unassigned | 283_24  | Clustered/Singleton | 1 VC_283_24   | 1   | 0      | 1          | 0      | 0 | 0 | 0 | 1 Ref      |
| MG775258 | Unassigned | Unassigned | Unassigned | 129_0   | Clustered           | 43 VC_129_0   | 43  | 0.886  | 1          | 0.886  | 0 | 0 | 0 | 1 Ref      |
| MG775260 | Unassigned | Unassigned | Unassigned | 842_0   | Clustered           | 2 VC_842_0    | 2   | 0.0559 | 0.95564851 | 0.0534 | 0 | 0 | 0 | 1 Ref      |
| MG781190 | Unassigned | Unassigned | Unassigned | 283_89  | Clustered           | 2 VC_283_89   | 2   | 0.0027 | 0.91264761 | 0.0025 | 0 | 0 | 0 | 1 Ref      |
| MG781191 | Unassigned | Unassigned | Unassigned | 283_89  | Clustered           | 2 VC_283_89   | 2   | 0.0027 | 0.91264761 | 0.0025 | 0 | 0 | 0 | 1 Ref      |
| MG784342 | Unassigned | Unassigned | Unassigned | 828_0   | Clustered           | 3 VC_828_0    | 3   | 0.4748 | 0.99843555 | 0.4741 | 0 | 0 | 0 | 1 Ref      |
| MG788324 | Unassigned | Unassigned | Unassigned | 300_0   | Clustered           | 3 VC_300_0    | 3   | 0.1218 | 0.99841701 | 0.1216 | 0 | 0 | 0 | 0.6667 Ref |
| MG793454 | Unassigned | Unassigned | Unassigned | 219_0   | Clustered           | 5 VC_219_0    | 5   | 0.08   | 0.99999998 | 0.08   | 0 | 0 | 0 | 1 Ref      |
| MG812486 | Unassigned | Unassigned | Unassigned | 325_50  | Clustered           | 4 VC_325_50   | 4   | 0.0182 | 0.99998785 | 0.0182 | 0 | 0 | 0 | 1 Ref      |
| MG812487 | Unassigned | Unassigned | Unassigned | 1093_0  | Clustered           | 40 VC_1093_0  | 40  | 0.8754 | 1          | 0.8754 | 0 | 0 | 0 | 1 Ref      |
| MG812488 | Unassigned | Unassigned | Unassigned | 520_98  | Clustered/Singleton | 1 VC_520_98   | 1   | 0      | 1          | 0      | 0 | 0 | 0 | 1 Ref      |
| MG812489 | Unassigned | Unassigned | Unassigned | 325_50  | Clustered           | 4 VC_325_50   | 4   | 0.0182 | 0.99998785 | 0.0182 | 0 | 0 | 0 | 1 Ref      |
| MG812490 | Unassigned | Unassigned | Unassigned | 508_0   | Clustered           | 32 VC_508_0   | 32  | 0.906  | 1          | 0.906  | 0 | 0 | 0 | 1 Ref      |
| MG812491 | Unassigned | Unassigned | Unassigned | 508_0   | Clustered           | 32 VC_508_0   | 32  | 0.906  | 1          | 0.906  | 0 | 0 | 0 | 1 Ref      |
| MG812492 | Unassigned | Unassigned | Unassigned | 513_0   | Clustered           | 32 VC_513_0   | 32  | 0.6881 | 1          | 0.6881 | 0 | 0 | 0 | 1 Ref      |
| MG812493 | Unassigned | Unassigned | Unassigned | 558_72  | Clustered/Singleton | 1 VC_558_72   | 1   | 0      | 1          | 0      | 0 | 0 | 0 | 1 Ref      |
| MG812494 | Unassigned | Unassigned | Unassigned | 558_68  | Clustered/Singleton | 1 VC_558_68   | 1   | 0      | 1          | 0      | 0 | 0 | 0 | 1 Ref      |
| MG812495 | Unassigned | Unassigned | Unassigned | 325_50  | Clustered           | 4 VC_325_50   | 4   | 0.0182 | 0.99998785 | 0.0182 | 0 | 0 | 0 | 1 Ref      |
| MG812496 | Unassigned | Unassigned | Unassigned | 949_0   | Clustered           | 10 VC_949_0   | 10  | 0.5977 | 1          | 0.5977 | 0 | 0 | 0 | 1 Ref      |
| MG820632 | Unassigned | Unassigned | Unassigned | 765_0   | Clustered           | 132 VC_765_0  | 132 | 1      | 1          | 1      | 0 | 0 | 0 | 1 Ref      |
| MG820633 | Unassigned | Unassigned | Unassigned | 765_0   | Clustered           | 132 VC_765_0  | 132 | 1      | 1          | 1      | 0 | 0 | 0 | 1 Ref      |
| MG820634 | Unassigned | Unassigned | Unassigned | 765_0   | Clustered           | 132 VC_765_0  | 132 | 1      | 1          | 1      | 0 | 0 | 0 | 1 Ref      |
| MG820635 | Unassigned | Unassigned | Unassigned | 765_0   | Clustered           | 132 VC_765_0  | 132 | 1      | 1          | 1      | 0 | 0 | 0 | 1 Ref      |
| MG820636 | Unassigned | Unassigned | Unassigned | 765_0   | Clustered           | 132 VC_765_0  | 132 | 1      | 1          | 1      | 0 | 0 | 0 | 1 Ref      |
| MG820637 | Unassigned | Unassigned | Unassigned | 765_0   | Clustered           | 132 VC_765_0  | 132 | 1      | 1          | 1      | 0 | 0 | 0 | 1 Ref      |
| MG820638 | Unassigned | Unassigned | Unassigned | 765_0   | Clustered           | 132 VC_765_0  | 132 | 1      | 1          | 1      | 0 | 0 | 0 | 1 Ref      |
| MG820639 | Unassigned | Unassigned | Unassigned | 765_0   | Clustered           | 132 VC_765_0  | 132 | 1      | 1          | 1      | 0 | 0 | 0 | 1 Ref      |
| MG820640 | Unassigned | Unassigned | Unassigned | 765_0   | Clustered           | 132 VC_765_0  | 132 | 1      | 1          | 1      | 0 | 0 | 0 | 1 Ref      |
| MG820641 | Unassigned | Unassigned | Unassigned | 765_0   | Clustered           | 132 VC_765_0  | 132 | 1      | 1          | 1      | 0 | 0 | 0 | 1 Ref      |
| MG820642 | Unassigned | Unassigned | Unassigned | 765_0   | Clustered           | 132 VC_765_0  | 132 | 1      | 1          | 1      | 0 | 0 | 0 | 1 Ref      |
| MG820643 | Unassigned | Unassigned | Unassigned | 765_0   | Clustered           | 132 VC_765_0  | 132 | 1      | 1          | 1      | 0 | 0 | 0 | 1 Ref      |
| MG820644 | Unassigned | Unassigned | Unassigned | 765_0   | Clustered           | 132 VC_765_0  | 132 | 1      | 1          | 1      | 0 | 0 | 0 | 1 Ref      |
| MG820645 | Unassigned | Unassigned | Unassigned | 765_0   | Clustered           | 132 VC_765_0  | 132 | 1      | 1          | 1      | 0 | 0 | 0 | 1 Ref      |
| MG832642 | Unassigned | Unassigned | Unassigned | 392_0   | Clustered           | 126 VC_392_0  | 126 | 0.9621 | 1          | 0.9621 | 0 | 0 | 0 | 1 Ref      |
| MG833025 | Unassigned | Unassigned | Unassigned | 392_0   | Clustered           | 126 VC_392_0  | 126 | 0.9621 | 1          | 0.9621 | 0 | 0 | 0 | 1 Ref      |
| MG835568 | Unassigned | Unassigned | Unassigned | 823_0   | Clustered           | 124 VC_823_0  | 124 | 0.9492 | 1          | 0.9492 | 0 | 0 | 0 | 1 Ref      |
| MG839014 | Unassigned | Unassigned | Unassigned | 509_0   | Clustered           | 37 VC_509_0   | 37  | 0.9689 | 1          | 0.9689 | 0 | 0 | 0 | 1 Ref      |
| MG839015 | Unassigned | Unassigned | Unassigned | 1240_0  | Clustered           | 82 VC_1240_0  | 82  | 0.7945 | 1          | 0.7945 | 0 | 0 | 0 | 1 Ref      |
| MG839016 | Unassigned | Unassigned | Unassigned | 1240_0  | Clustered           | 82 VC_1240_0  | 82  | 0.7945 | 1          | 0.7945 | 0 | 0 | 0 | 1 Ref      |
| MG839017 | Unassigned | Unassigned | Unassigned | 1240_0  | Clustered           | 82 VC_1240_0  | 82  | 0.7945 | 1          | 0.7945 | 0 | 0 | 0 | 1 Ref      |
| MG839018 | Unassigned | Unassigned | Unassigned | 1240_0  | Clustered           | 82 VC_1240_0  | 82  | 0.7945 | 1          | 0.7945 | 0 | 0 | 0 | 1 Ref      |
| MG839020 | Unassigned | Unassigned | Unassigned | 1240_0  | Clustered           | 82 VC_1240_0  | 82  | 0.7945 | 1          | 0.7945 | 0 | 0 | 0 | 1 Ref      |
| MG839021 | Unassigned | Unassigned | Unassigned | 1240_0  | Clustered           | 82 VC_1240_0  | 82  | 0.7945 | 1          | 0.7945 | 0 | 0 | 0 | 1 Ref      |
| MG839022 | Unassigned | Unassigned | Unassigned | 1240_0  | Clustered           | 82 VC_1240_0  | 82  | 0.7945 | 1          | 0.7945 | 0 | 0 | 0 | 1 Ref      |
| MG839023 | Unassigned | Unassigned | Unassigned | 1240_0  | Clustered           | 82 VC_1240_0  | 82  | 0.7945 | 1          | 0.7945 | 0 | 0 | 0 | 1 Ref      |
| MG839026 | Unassigned | Unassigned | Unassigned | 1240_0  | Clustered           | 82 VC_1240_0  | 82  | 0.7945 | 1          | 0.7945 | 0 | 0 | 0 | 1 Ref      |
| MG839027 | Unassigned | Unassigned | Unassigned | 1163_0  | Clustered           | 28 VC_1163_0  | 28  | 0.4923 | 1          | 0.4923 | 0 | 0 | 0 | 1 Ref      |
| MG839028 | Unassigned | Unassigned | Unassigned | 1240_0  | Clustered           | 82 VC_1240_0  | 82  | 0.7945 | 1          | 0.7945 | 0 | 0 | 0 | 1 Ref      |
| MG839029 | Unassigned | Unassigned | Unassigned | 1240_0  | Clustered           | 82 VC_1240_0  | 82  | 0.7945 | 1          | 0.7945 | 0 | 0 | 0 | 1 Ref      |
| MG845684 | Unassigned | Unassigned | Unassigned | 472_0   | Clustered           | 47 VC_472_0   | 47  | 0.9025 | 1          | 0.9025 | 0 | 0 | 0 | 1 Ref      |
| MG845865 | Unassigned | Unassigned | Unassigned | 451_0   | Clustered           | 80 VC_451_0   | 80  | 0.9991 | 1          | 0.9991 | 0 | 0 | 0 | 1 Ref      |
| MG852086 | Unassigned | Unassigned | Unassigned | 638_0   | Clustered           | 45 VC_638_0   | 45  | 0.7741 | 1          | 0.7741 | 0 | 0 | 0 | 1 Ref      |
| MG867727 | Unassigned | Unassigned | Unassigned | 283_138 | Clustered/Singleton | 1 VC_283_138  | 1   | 0      | 1          | 0      | 0 | 0 | 0 | 1 Ref      |
| MG872831 | Unassigned | Unassigned | Unassigned | 551_0   | Clustered           | 16 VC_551_0   | 16  | 0.0915 | 1          | 0.0915 | 0 | 0 | 0 | 0.6667 Ref |
| MG872832 | Unassigned | Unassigned | Unassigned | 551_0   | Clustered           | 16 VC_551_0   | 16  | 0.0915 | 1          | 0.0915 | 0 | 0 | 0 | 0.6667 Ref |
| MG872833 | Unassigned | Unassigned | Unassigned | 325_5   | Clustered           | 11 VC_325_5   | 11  | 0.047  | 1          | 0.047  | 0 | 0 | 0 | 0.7636 Ref |
| MG872834 | Unassigned | Unassigned | Unassigned | 685_0   | Clustered           | 16 VC_685_0   | 16  | 0.2972 | 1          | 0.2972 | 0 | 0 | 0 | 0.9167 Ref |
| MG872835 | Unassigned | Unassigned | Unassigned | 225_0   | Clustered           | 32 VC_225_0   | 32  | 0.848  | 1          | 0.848  | 0 | 0 | 0 | 0.996 Ref  |
| MG872836 | Unassigned | Unassigned | Unassigned | 325_50  | Clustered           | 4 VC_325_50   | 4   | 0.0182 | 0.99998785 | 0.0182 | 0 | 0 | 0 | 1 Ref      |
| MG872837 | Unassigned | Unassigned | Unassigned | 551_6   | Clustered           | 22 VC_551_6   | 22  | 0.1214 | 1          | 0.1214 | 0 | 0 | 0 | 0.8095 Ref |
| MG872838 | Unassigned | Unassigned | Unassigned | 556_0   | Clustered           | 21 VC_556_0   | 21  | 0.9912 | 1          | 0.9912 | 0 | 0 | 0 | 1 Ref      |
| MG872839 | Unassigned | Unassigned | Unassigned | 558_14  | Clustered           | 8 VC_558_14   | 8   | 0.0228 | 0.99945246 | 0.0228 | 0 | 0 | 0 | 0.8214 Ref |
| MG872840 | Unassigned | Unassigned | Unassigned | 225_0   | Clustered           | 32 VC_225_0   | 32  | 0.848  | 1          | 0.848  | 0 | 0 | 0 | 0.996 Ref  |
| MG872841 | Unassigned | Unassigned | Unassigned | 520_45  | Clustered           | 7 VC_520_45   | 7   | 0.0635 | 1          | 0.0635 | 0 | 0 | 0 | 0.8095 Ref |
| MG872842 | Unassigned | Unassigned | Unassigned | 225_0   | Clustered           | 32 VC_225_0   | 32  | 0.848  | 1          | 0.848  | 0 | 0 | 0 | 0.996 Ref  |
| MG872843 | Unassigned | Unassigned | Unassigned | 551_0   | Clustered           | 16 VC_551_0   | 16  | 0.0915 | 1          | 0.0915 | 0 | 0 | 0 | 0.6667 Ref |
| MG873442 | Unassigned | Unassigned | Unassigned | 812_0   | Clustered           | 3 VC_812_0    | 3   | 0.1174 | 0.99842379 | 0.1172 | 0 | 0 | 0 | 1 Ref      |
| MG878892 | Unassigned | Unassigned | Unassigned | 878_0   | Clustered           | 32 VC_878_0   | 32  | 0.9965 | 1          | 0.9965 | 0 | 0 | 0 | 1 Ref      |
| MG883709 | Unassigned | Unassigned | Unassigned | 1243_0  | Clustered           | 52 VC_1243_0  | 52  | 0.9126 | 0.92708311 | 0.8461 | 0 | 0 | 0 | 1 Ref      |
| MG883710 | Unassigned | Unassigned | Unassigned | 1245_0  | Clustered           | 2 VC_1245_0   | 2   | 1      | 1          | 1      | 0 | 0 | 0 | 1 Ref      |
| MG883712 | Unassigned | Unassigned | Unassigned | 1197_0  | Clustered           | 15 VC_1197_0  | 15  | 0.8991 | 0.76608394 | 0.6888 | 0 | 0 | 0 | 1 Ref      |
| MG883713 | Unassigned | Unassigned | Unassigned | 1246_0  | Clustered           | 2 VC_1246_0   | 2   | 1      | 1          | 1      | 0 | 0 | 0 | 1 Ref      |
| MG883714 | Unassigned | Unassigned | Unassigned | 1144_0  | Clustered           | 7 VC_1144_0   | 7   | 0.7076 | 1          | 0.7076 | 0 | 0 | 0 | 1 Ref      |
| MG883715 | Unassigned | Unassigned | Unassigned | 672_0   | Clustered           | 12 VC_672_0   | 12  | 1      | 1          | 1      | 0 | 0 | 0 | 1 Ref      |
| MG883717 | Unassigned | Unassigned | Unassigned | 1104_0  | Clustered           | 154 VC_1104_0 | 154 | 0.8484 | 1          | 0.8484 | 0 | 0 | 0 | 1 Ref      |
| MG883718 | Unassigned | Unassigned | Unassigned | 1108_0  | Clustered           | 4 VC_1108_0   | 4   | 0.0485 | 0.99999021 | 0.0485 | 0 | 0 | 0 | 1 Ref      |



|          |            |            |            |        |                     |               |     |        |            |        |   |   |   |            |
|----------|------------|------------|------------|--------|---------------------|---------------|-----|--------|------------|--------|---|---|---|------------|
| MG883719 | Unassigned | Unassigned | Unassigned | 1116_0 | Clustered           | 14 VC_1116_0  | 14  | 0.7927 | 1          | 0.7927 | 0 | 0 | 0 | 1 Ref      |
| MG883720 | Unassigned | Unassigned | Unassigned | 1247_0 | Clustered           | 7 VC_1247_0   | 7   | 0.9086 | 0.9998959  | 0.9086 | 0 | 0 | 0 | 1 Ref      |
| MG883722 | Unassigned | Unassigned | Unassigned | 1125_0 | Clustered           | 20 VC_1125_0  | 20  | 0.5599 | 0          | 0.5599 | 0 | 0 | 0 | 1 Ref      |
| MG883723 | Unassigned | Unassigned | Unassigned | 198_0  | Clustered           | 28 VC_198_0   | 28  | 0.2429 | 0.99971175 | 0.2429 | 0 | 0 | 0 | 1 Ref      |
| MG883724 | Unassigned | Unassigned | Unassigned | 1250_0 | Clustered           | 5 VC_1250_0   | 5   | 0.6384 | 0.99918945 | 0.6379 | 0 | 0 | 0 | 1 Ref      |
| MG883725 | Unassigned | Unassigned | Unassigned | 672_0  | Clustered           | 12 VC_672_0   | 12  | 1      | 1          | 1      | 0 | 0 | 0 | 1 Ref      |
| MG883726 | Unassigned | Unassigned | Unassigned | 1077_0 | Clustered           | 48 VC_1077_0  | 48  | 0.8525 | 1          | 0.8525 | 0 | 0 | 0 | 1 Ref      |
| MG893203 | Unassigned | Unassigned | Unassigned | 882_0  | Clustered           | 20 VC_882_0   | 20  | 0.9917 | 1          | 0.9917 | 0 | 0 | 0 | 1 Ref      |
| MG894052 | Unassigned | Unassigned | Unassigned | 938_0  | Clustered           | 99 VC_938_0   | 99  | 0.9119 | 1          | 0.9119 | 0 | 0 | 0 | 0.9928 Ref |
| MG897799 | Unassigned | Unassigned | Unassigned | 79_0   | Clustered           | 64 VC_79_0    | 64  | 0.4185 | 1          | 0.4185 | 0 | 0 | 0 | 0.7649 Ref |
| MG897800 | Unassigned | Unassigned | Unassigned | 749_0  | Clustered           | 40 VC_749_0   | 40  | 0.7517 | 1          | 0.7517 | 0 | 0 | 0 | 1 Ref      |
| MG913376 | Unassigned | Unassigned | Unassigned | 640_0  | Clustered           | 7 VC_640_0    | 7   | 0.9025 | 1          | 0.9025 | 0 | 0 | 0 | 1 Ref      |
| MG920059 | Unassigned | Unassigned | Unassigned | 509_0  | Clustered           | 37 VC_509_0   | 37  | 0.9689 | 1          | 0.9689 | 0 | 0 | 0 | 1 Ref      |
| MG920060 | Unassigned | Unassigned | Unassigned | 325_23 | Clustered           | 17 VC_325_23  | 17  | 0.0716 | 1          | 0.0716 | 0 | 0 | 0 | 0.6397 Ref |
| MG920061 | Unassigned | Unassigned | Unassigned | 1240_0 | Clustered           | 82 VC_1240_0  | 82  | 0.7945 | 1          | 0.7945 | 0 | 0 | 0 | 1 Ref      |
| MG922974 | Unassigned | Unassigned | Unassigned | 779_0  | Clustered           | 37 VC_779_0   | 37  | 0.5682 | 1          | 0.5682 | 0 | 0 | 0 | 1 Ref      |
| MG925338 | Unassigned | Unassigned | Unassigned | 509_0  | Clustered           | 37 VC_509_0   | 37  | 0.9689 | 1          | 0.9689 | 0 | 0 | 0 | 1 Ref      |
| MG925339 | Unassigned | Unassigned | Unassigned | 371_3  | Clustered           | 22 VC_371_3   | 22  | 0.0787 | 1          | 0.0787 | 0 | 0 | 0 | 0.9048 Ref |
| MG925340 | Unassigned | Unassigned | Unassigned | 325_61 | Clustered           | 8 VC_325_61   | 8   | 0.0395 | 1          | 0.0395 | 0 | 0 | 0 | 0.7857 Ref |
| MG925341 | Unassigned | Unassigned | Unassigned | 514_0  | Clustered           | 75 VC_514_0   | 75  | 0.9402 | 1          | 0.9402 | 0 | 0 | 0 | 1 Ref      |
| MG925342 | Unassigned | Unassigned | Unassigned | 325_61 | Clustered           | 8 VC_325_61   | 8   | 0.0395 | 1          | 0.0395 | 0 | 0 | 0 | 0.7857 Ref |
| MG925343 | Unassigned | Unassigned | Unassigned | 1163_0 | Clustered           | 28 VC_1163_0  | 28  | 0.4923 | 1          | 0.4923 | 0 | 0 | 0 | 1 Ref      |
| MG925344 | Unassigned | Unassigned | Unassigned | 325_5  | Clustered           | 11 VC_325_5   | 11  | 0.047  | 1          | 0.047  | 0 | 0 | 0 | 0.7636 Ref |
| MG925345 | Unassigned | Unassigned | Unassigned | 1163_0 | Clustered           | 28 VC_1163_0  | 28  | 0.4923 | 1          | 0.4923 | 0 | 0 | 0 | 1 Ref      |
| MG925346 | Unassigned | Unassigned | Unassigned | 371_15 | Clustered           | 44 VC_371_15  | 44  | 0.1391 | 1          | 0.1391 | 0 | 0 | 0 | 0.7474 Ref |
| MG925347 | Unassigned | Unassigned | Unassigned | 1163_0 | Clustered           | 28 VC_1163_0  | 28  | 0.4923 | 1          | 0.4923 | 0 | 0 | 0 | 1 Ref      |
| MG925348 | Unassigned | Unassigned | Unassigned | 371_16 | Clustered           | 42 VC_371_16  | 42  | 0.1341 | 1          | 0.1341 | 0 | 0 | 0 | 0.7282 Ref |
| MG925349 | Unassigned | Unassigned | Unassigned | 1046_0 | Clustered           | 7 VC_1046_0   | 7   | 0.9413 | 1          | 0.9413 | 0 | 0 | 0 | 1 Ref      |
| MG925350 | Unassigned | Unassigned | Unassigned | 371_15 | Clustered           | 44 VC_371_15  | 44  | 0.1391 | 1          | 0.1391 | 0 | 0 | 0 | 0.7474 Ref |
| MG925351 | Unassigned | Unassigned | Unassigned | 325_23 | Clustered           | 17 VC_325_23  | 17  | 0.0716 | 1          | 0.0716 | 0 | 0 | 0 | 0.6397 Ref |
| MG925352 | Unassigned | Unassigned | Unassigned | 1240_0 | Clustered           | 82 VC_1240_0  | 82  | 0.7945 | 1          | 0.7945 | 0 | 0 | 0 | 1 Ref      |
| MG925353 | Unassigned | Unassigned | Unassigned | 509_0  | Clustered           | 37 VC_509_0   | 37  | 0.9689 | 1          | 0.9689 | 0 | 0 | 0 | 1 Ref      |
| MG925354 | Unassigned | Unassigned | Unassigned | 520_97 | Clustered/Singleton | 1 VC_520_97   | 1   | 0      | 1          | 0      | 0 | 0 | 0 | 1 Ref      |
| MG925355 | Unassigned | Unassigned | Unassigned | 514_0  | Clustered           | 75 VC_514_0   | 75  | 0.9402 | 1          | 0.9402 | 0 | 0 | 0 | 1 Ref      |
| MG925356 | Unassigned | Unassigned | Unassigned | 371_2  | Clustered           | 8 VC_371_2    | 8   | 0.0232 | 1          | 0.0232 | 0 | 0 | 0 | 0.8571 Ref |
| MG941013 | Unassigned | Unassigned | Unassigned | 853_0  | Clustered           | 2 VC_853_0    | 2   | 0.27   | 0.72985431 | 0.1971 | 0 | 0 | 0 | 1 Ref      |
| MG944216 | Unassigned | Unassigned | Unassigned | 1163_0 | Clustered           | 28 VC_1163_0  | 28  | 0.4923 | 1          | 0.4923 | 0 | 0 | 0 | 1 Ref      |
| MG944217 | Unassigned | Unassigned | Unassigned | 517_1  | Clustered           | 108 VC_517_1  | 108 | 0.8483 | 1          | 0.8483 | 0 | 0 | 0 | 0.9955 Ref |
| MG944218 | Unassigned | Unassigned | Unassigned | 1163_0 | Clustered           | 28 VC_1163_0  | 28  | 0.4923 | 1          | 0.4923 | 0 | 0 | 0 | 1 Ref      |
| MG944219 | Unassigned | Unassigned | Unassigned | 1240_0 | Clustered           | 82 VC_1240_0  | 82  | 0.7945 | 1          | 0.7945 | 0 | 0 | 0 | 1 Ref      |
| MG944220 | Unassigned | Unassigned | Unassigned | 325_26 | Clustered/Singleton | 1 VC_325_26   | 1   | 0      | 0          | 0      | 0 | 0 | 0 | 1 Ref      |
| MG944221 | Unassigned | Unassigned | Unassigned | 325_7  | Clustered           | 3 VC_325_7    | 3   | 0.0085 | 0.99739782 | 0.0085 | 0 | 0 | 0 | 0.6667 Ref |
| MG944222 | Unassigned | Unassigned | Unassigned | 1240_0 | Clustered           | 82 VC_1240_0  | 82  | 0.7945 | 1          | 0.7945 | 0 | 0 | 0 | 1 Ref      |
| MG944223 | Unassigned | Unassigned | Unassigned | 371_13 | Clustered           | 33 VC_371_13  | 33  | 0.179  | 1          | 0.179  | 0 | 0 | 0 | 0.8769 Ref |
| MG944224 | Unassigned | Unassigned | Unassigned | 517_1  | Clustered           | 108 VC_517_1  | 108 | 0.8483 | 1          | 0.8483 | 0 | 0 | 0 | 0.9955 Ref |
| MG944225 | Unassigned | Unassigned | Unassigned | 371_15 | Clustered           | 44 VC_371_15  | 44  | 0.1391 | 1          | 0.1391 | 0 | 0 | 0 | 0.7474 Ref |
| MG944226 | Unassigned | Unassigned | Unassigned | 1163_0 | Clustered           | 28 VC_1163_0  | 28  | 0.4923 | 1          | 0.4923 | 0 | 0 | 0 | 1 Ref      |
| MG944227 | Unassigned | Unassigned | Unassigned | 364_0  | Clustered           | 16 VC_364_0   | 16  | 0.6491 | 1          | 0.6491 | 0 | 0 | 0 | 1 Ref      |
| MG944228 | Unassigned | Unassigned | Unassigned | 364_0  | Clustered           | 16 VC_364_0   | 16  | 0.6491 | 1          | 0.6491 | 0 | 0 | 0 | 1 Ref      |
| MG944229 | Unassigned | Unassigned | Unassigned | 364_0  | Clustered           | 16 VC_364_0   | 16  | 0.6491 | 1          | 0.6491 | 0 | 0 | 0 | 1 Ref      |
| MG944230 | Unassigned | Unassigned | Unassigned | 364_0  | Clustered           | 16 VC_364_0   | 16  | 0.6491 | 1          | 0.6491 | 0 | 0 | 0 | 1 Ref      |
| MG944231 | Unassigned | Unassigned | Unassigned | 364_0  | Clustered           | 16 VC_364_0   | 16  | 0.6491 | 1          | 0.6491 | 0 | 0 | 0 | 1 Ref      |
| MG944232 | Unassigned | Unassigned | Unassigned | 364_0  | Clustered           | 16 VC_364_0   | 16  | 0.6491 | 1          | 0.6491 | 0 | 0 | 0 | 1 Ref      |
| MG944233 | Unassigned | Unassigned | Unassigned | 364_0  | Clustered           | 16 VC_364_0   | 16  | 0.6491 | 1          | 0.6491 | 0 | 0 | 0 | 1 Ref      |
| MG944234 | Unassigned | Unassigned | Unassigned | 364_0  | Clustered           | 16 VC_364_0   | 16  | 0.6491 | 1          | 0.6491 | 0 | 0 | 0 | 1 Ref      |
| MG944235 | Unassigned | Unassigned | Unassigned | 364_0  | Clustered           | 16 VC_364_0   | 16  | 0.6491 | 1          | 0.6491 | 0 | 0 | 0 | 1 Ref      |
| MG944236 | Unassigned | Unassigned | Unassigned | 364_0  | Clustered           | 16 VC_364_0   | 16  | 0.6491 | 1          | 0.6491 | 0 | 0 | 0 | 1 Ref      |
| MG945128 | Unassigned | Unassigned | Unassigned | 1251_0 | Clustered           | 15 VC_1251_0  | 15  | 0.9082 | 1          | 0.9082 | 0 | 0 | 0 | 1 Ref      |
| MG945129 | Unassigned | Unassigned | Unassigned | 1077_0 | Clustered           | 48 VC_1077_0  | 48  | 0.8525 | 1          | 0.8525 | 0 | 0 | 0 | 1 Ref      |
| MG945130 | Unassigned | Unassigned | Unassigned | 1233_0 | Clustered           | 16 VC_1233_0  | 16  | 0.8971 | 1          | 0.8971 | 0 | 0 | 0 | 1 Ref      |
| MG945131 | Unassigned | Unassigned | Unassigned | 1114_0 | Clustered           | 2 VC_1114_0   | 2   | 0.0522 | 0.94760452 | 0.0495 | 0 | 0 | 0 | 1 Ref      |
| MG945135 | Unassigned | Unassigned | Unassigned | 1124_0 | Clustered           | 10 VC_1124_0  | 10  | 0.6268 | 1          | 0.6268 | 0 | 0 | 0 | 1 Ref      |
| MG945136 | Unassigned | Unassigned | Unassigned | 1124_0 | Clustered           | 10 VC_1124_0  | 10  | 0.6268 | 1          | 0.6268 | 0 | 0 | 0 | 1 Ref      |
| MG945138 | Unassigned | Unassigned | Unassigned | 1126_0 | Clustered           | 8 VC_1126_0   | 8   | 0.2864 | 1          | 0.2864 | 0 | 0 | 0 | 1 Ref      |
| MG945139 | Unassigned | Unassigned | Unassigned | 1116_0 | Clustered           | 14 VC_1116_0  | 14  | 0.7927 | 1          | 0.7927 | 0 | 0 | 0 | 1 Ref      |
| MG945140 | Unassigned | Unassigned | Unassigned | 1257_0 | Clustered           | 6 VC_1257_0   | 6   | 0.6517 | 0.99999969 | 0.6517 | 0 | 0 | 0 | 1 Ref      |
| MG945141 | Unassigned | Unassigned | Unassigned | 1211_0 | Clustered           | 25 VC_1211_0  | 25  | 1      | 1          | 1      | 0 | 0 | 0 | 1 Ref      |
| MG945142 | Unassigned | Unassigned | Unassigned | 1136_0 | Clustered           | 2 VC_1136_0   | 2   | 0.58   | 0.88261817 | 0.5119 | 0 | 0 | 0 | 1 Ref      |
| MG945153 | Unassigned | Unassigned | Unassigned | 1104_0 | Clustered           | 154 VC_1104_0 | 154 | 0.8484 | 1          | 0.8484 | 0 | 0 | 0 | 1 Ref      |
| MG945154 | Unassigned | Unassigned | Unassigned | 1119_0 | Clustered           | 20 VC_1119_0  | 20  | 0.6751 | 0.99997892 | 0.6751 | 0 | 0 | 0 | 1 Ref      |
| MG945157 | Unassigned | Unassigned | Unassigned | 1124_0 | Clustered           | 10 VC_1124_0  | 10  | 0.6268 | 1          | 0.6268 | 0 | 0 | 0 | 1 Ref      |
| MG945158 | Unassigned | Unassigned | Unassigned | 1104_0 | Clustered           | 154 VC_1104_0 | 154 | 0.8484 | 1          | 0.8484 | 0 | 0 | 0 | 1 Ref      |
| MG945159 | Unassigned | Unassigned | Unassigned | 1251_0 | Clustered           | 15 VC_1251_0  | 15  | 0.9082 | 1          | 0.9082 | 0 | 0 | 0 | 1 Ref      |
| MG945160 | Unassigned | Unassigned | Unassigned | 1191_0 | Clustered           | 3 VC_1191_0   | 3   | 0.1408 | 0.98976974 | 0.1394 | 0 | 0 | 0 | 1 Ref      |
| MG945161 | Unassigned | Unassigned | Unassigned | 1000_0 | Clustered           | 21 VC_1000_0  | 21  | 0.8437 | 0.99999998 | 0.8437 | 0 | 0 | 0 | 1 Ref      |
| MG945162 | Unassigned | Unassigned | Unassigned | 1127_0 | Clustered           | 19 VC_1127_0  | 19  | 0.7611 | 1          | 0.7611 | 0 | 0 | 0 | 1 Ref      |
| MG945163 | Unassigned | Unassigned | Unassigned | 1104_0 | Clustered           | 154 VC_1104_0 | 154 | 0.8484 | 1          | 0.8484 | 0 | 0 | 0 | 1 Ref      |
| MG945164 | Unassigned | Unassigned | Unassigned | 398_0  | Clustered           | 48 VC_398_0   | 48  | 0.4813 | 1          | 0.4813 | 0 | 0 | 0 | 1 Ref      |
| MG945165 | Unassigned | Unassigned | Unassigned | 1260_0 | Clustered           | 2 VC_1260_0   | 2   | 1      | 1          | 1      | 0 | 0 | 0 | 1 Ref      |
| MG945166 | Unassigned | Unassigned | Unassigned | 1259_0 | Clustered           | 8 VC_1259_0   | 8   | 0.8225 | 1          | 0.8225 | 0 | 0 | 0 | 1 Ref      |
| MG945177 | Unassigned | Unassigned | Unassigned | 1261_0 | Clustered           | 5 VC_1261_0   | 5   | 0.765  | 0.99993003 | 0.7649 | 0 | 0 | 0 | 1 Ref      |



|          |            |            |            |        |                     |               |     |        |            |        |   |   |   |       |
|----------|------------|------------|------------|--------|---------------------|---------------|-----|--------|------------|--------|---|---|---|-------|
| MG945178 | Unassigned | Unassigned | Unassigned | 1062_0 | Clustered           | 45 VC_1062_0  | 45  | 0.9734 | 0.50949847 | 0.4959 | 0 | 0 | 0 | 1 Ref |
| MG945179 | Unassigned | Unassigned | Unassigned | 1148_0 | Clustered           | 16 VC_1148_0  | 16  | 0.8821 | 1          | 0.8821 | 0 | 0 | 0 | 1 Ref |
| MG945181 | Unassigned | Unassigned | Unassigned | 1110_0 | Clustered           | 8 VC_1110_0   | 8   | 0.6915 | 1          | 0.6915 | 0 | 0 | 0 | 1 Ref |
| MG945183 | Unassigned | Unassigned | Unassigned | 1263_0 | Clustered           | 2 VC_1263_0   | 2   | 1      | 1          | 1      | 0 | 0 | 0 | 1 Ref |
| MG945185 | Unassigned | Unassigned | Unassigned | 1191_0 | Clustered           | 3 VC_1191_0   | 3   | 0.1408 | 0.98976974 | 0.1394 | 0 | 0 | 0 | 1 Ref |
| MG945186 | Unassigned | Unassigned | Unassigned | 1122_0 | Clustered           | 10 VC_1122_0  | 10  | 0.9643 | 0.99999697 | 0.9643 | 0 | 0 | 0 | 1 Ref |
| MG945188 | Unassigned | Unassigned | Unassigned | 1251_0 | Clustered           | 15 VC_1251_0  | 15  | 0.9082 | 1          | 0.9082 | 0 | 0 | 0 | 1 Ref |
| MG945189 | Unassigned | Unassigned | Unassigned | 1266_0 | Clustered           | 5 VC_1266_0   | 5   | 1      | 1          | 1      | 0 | 0 | 0 | 1 Ref |
| MG945190 | Unassigned | Unassigned | Unassigned | 1104_0 | Clustered           | 154 VC_1104_0 | 154 | 0.8484 | 1          | 0.8484 | 0 | 0 | 0 | 1 Ref |
| MG945202 | Unassigned | Unassigned | Unassigned | 995_0  | Clustered           | 69 VC_995_0   | 69  | 0.8547 | 1          | 0.8547 | 0 | 0 | 0 | 1 Ref |
| MG945203 | Unassigned | Unassigned | Unassigned | 1104_0 | Clustered           | 154 VC_1104_0 | 154 | 0.8484 | 1          | 0.8484 | 0 | 0 | 0 | 1 Ref |
| MG945204 | Unassigned | Unassigned | Unassigned | 1152_0 | Clustered           | 4 VC_1152_0   | 4   | 0.7206 | 0.99971165 | 0.7204 | 0 | 0 | 0 | 1 Ref |
| MG945205 | Unassigned | Unassigned | Unassigned | 1104_0 | Clustered           | 154 VC_1104_0 | 154 | 0.8484 | 1          | 0.8484 | 0 | 0 | 0 | 1 Ref |
| MG945206 | Unassigned | Unassigned | Unassigned | 1077_0 | Clustered           | 48 VC_1077_0  | 48  | 0.8525 | 1          | 0.8525 | 0 | 0 | 0 | 1 Ref |
| MG945207 | Unassigned | Unassigned | Unassigned | 1104_0 | Clustered           | 154 VC_1104_0 | 154 | 0.8484 | 1          | 0.8484 | 0 | 0 | 0 | 1 Ref |
| MG945208 | Unassigned | Unassigned | Unassigned | 1259_0 | Clustered           | 8 VC_1259_0   | 8   | 0.8225 | 1          | 0.8225 | 0 | 0 | 0 | 1 Ref |
| MG945209 | Unassigned | Unassigned | Unassigned | 1267_0 | Clustered           | 7 VC_1267_0   | 7   | 1      | 1          | 1      | 0 | 0 | 0 | 1 Ref |
| MG945210 | Unassigned | Unassigned | Unassigned | 1194_0 | Clustered           | 5 VC_1194_0   | 5   | 0.5236 | 0.99999899 | 0.5236 | 0 | 0 | 0 | 1 Ref |
| MG945211 | Unassigned | Unassigned | Unassigned | 1110_0 | Clustered           | 8 VC_1110_0   | 8   | 0.6915 | 1          | 0.6915 | 0 | 0 | 0 | 1 Ref |
| MG945212 | Unassigned | Unassigned | Unassigned | 1268_0 | Clustered           | 3 VC_1268_0   | 3   | 0.0807 | 0.6862532  | 0.0554 | 0 | 0 | 0 | 1 Ref |
| MG945213 | Unassigned | Unassigned | Unassigned | 1104_0 | Clustered           | 154 VC_1104_0 | 154 | 0.8484 | 1          | 0.8484 | 0 | 0 | 0 | 1 Ref |
| MG945214 | Unassigned | Unassigned | Unassigned | 1270_0 | Clustered           | 3 VC_1270_0   | 3   | 0.6808 | 0.98688028 | 0.6719 | 0 | 0 | 0 | 1 Ref |
| MG945215 | Unassigned | Unassigned | Unassigned | 672_0  | Clustered           | 12 VC_672_0   | 12  | 1      | 1          | 1      | 0 | 0 | 0 | 1 Ref |
| MG945227 | Unassigned | Unassigned | Unassigned | 1104_0 | Clustered           | 154 VC_1104_0 | 154 | 0.8484 | 1          | 0.8484 | 0 | 0 | 0 | 1 Ref |
| MG945228 | Unassigned | Unassigned | Unassigned | 1151_0 | Clustered           | 9 VC_1151_0   | 9   | 0.8548 | 1          | 0.8548 | 0 | 0 | 0 | 1 Ref |
| MG945229 | Unassigned | Unassigned | Unassigned | 1251_0 | Clustered           | 15 VC_1251_0  | 15  | 0.9082 | 1          | 0.9082 | 0 | 0 | 0 | 1 Ref |
| MG945230 | Unassigned | Unassigned | Unassigned | 1271_0 | Clustered           | 2 VC_1271_0   | 2   | 1      | 1          | 1      | 0 | 0 | 0 | 1 Ref |
| MG945231 | Unassigned | Unassigned | Unassigned | 1128_0 | Clustered           | 2 VC_1128_0   | 2   | 0.0904 | 0.95143313 | 0.086  | 0 | 0 | 0 | 1 Ref |
| MG945232 | Unassigned | Unassigned | Unassigned | 1110_0 | Clustered           | 8 VC_1110_0   | 8   | 0.6915 | 1          | 0.6915 | 0 | 0 | 0 | 1 Ref |
| MG945233 | Unassigned | Unassigned | Unassigned | 1127_0 | Clustered           | 19 VC_1127_0  | 19  | 0.7611 | 1          | 0.7611 | 0 | 0 | 0 | 1 Ref |
| MG945234 | Unassigned | Unassigned | Unassigned | 1146_0 | Clustered           | 3 VC_1146_0   | 3   | 0.3641 | 0.99867077 | 0.3636 | 0 | 0 | 0 | 1 Ref |
| MG945235 | Unassigned | Unassigned | Unassigned | 1272_0 | Clustered           | 5 VC_1272_0   | 5   | 1      | 1          | 1      | 0 | 0 | 0 | 1 Ref |
| MG945236 | Unassigned | Unassigned | Unassigned | 1273_0 | Clustered           | 6 VC_1273_0   | 6   | 0.7385 | 0.9999804  | 0.7385 | 0 | 0 | 0 | 1 Ref |
| MG945237 | Unassigned | Unassigned | Unassigned | 1104_0 | Clustered           | 154 VC_1104_0 | 154 | 0.8484 | 1          | 0.8484 | 0 | 0 | 0 | 1 Ref |
| MG945238 | Unassigned | Unassigned | Unassigned | 1104_0 | Clustered           | 154 VC_1104_0 | 154 | 0.8484 | 1          | 0.8484 | 0 | 0 | 0 | 1 Ref |
| MG945241 | Unassigned | Unassigned | Unassigned | 1256_0 | Clustered           | 4 VC_1256_0   | 4   | 0.581  | 0.94751743 | 0.5505 | 0 | 0 | 0 | 1 Ref |
| MG945252 | Unassigned | Unassigned | Unassigned | 1275_0 | Clustered           | 4 VC_1275_0   | 4   | 1      | 1          | 1      | 0 | 0 | 0 | 1 Ref |
| MG945254 | Unassigned | Unassigned | Unassigned | 743_0  | Clustered           | 15 VC_743_0   | 15  | 1      | 1          | 1      | 0 | 0 | 0 | 1 Ref |
| MG945255 | Unassigned | Unassigned | Unassigned | 1251_0 | Clustered           | 15 VC_1251_0  | 15  | 0.9082 | 1          | 0.9082 | 0 | 0 | 0 | 1 Ref |
| MG945256 | Unassigned | Unassigned | Unassigned | 1253_0 | Clustered           | 16 VC_1233_0  | 16  | 0.8971 | 1          | 0.8971 | 0 | 0 | 0 | 1 Ref |
| MG945257 | Unassigned | Unassigned | Unassigned | 1257_0 | Clustered           | 6 VC_1257_0   | 6   | 0.6517 | 0.99999969 | 0.6517 | 0 | 0 | 0 | 1 Ref |
| MG945258 | Unassigned | Unassigned | Unassigned | 1279_0 | Clustered           | 4 VC_1279_0   | 4   | 0.6058 | 0.76972092 | 0.4663 | 0 | 0 | 0 | 1 Ref |
| MG945260 | Unassigned | Unassigned | Unassigned | 1243_0 | Clustered           | 52 VC_1243_0  | 52  | 0.9126 | 0.92708311 | 0.8461 | 0 | 0 | 0 | 1 Ref |
| MG945261 | Unassigned | Unassigned | Unassigned | 1264_0 | Clustered           | 6 VC_1264_0   | 6   | 0.7062 | 0.92055725 | 0.6501 | 0 | 0 | 0 | 1 Ref |
| MG945263 | Unassigned | Unassigned | Unassigned | 1267_0 | Clustered           | 7 VC_1267_0   | 7   | 1      | 1          | 1      | 0 | 0 | 0 | 1 Ref |
| MG945275 | Unassigned | Unassigned | Unassigned | 1266_0 | Clustered           | 5 VC_1266_0   | 5   | 1      | 1          | 1      | 0 | 0 | 0 | 1 Ref |
| MG945276 | Unassigned | Unassigned | Unassigned | 1256_0 | Clustered           | 4 VC_1256_0   | 4   | 0.581  | 0.94751743 | 0.5505 | 0 | 0 | 0 | 1 Ref |
| MG945278 | Unassigned | Unassigned | Unassigned | 1281_0 | Clustered           | 7 VC_1281_0   | 7   | 0.9212 | 0.99995294 | 0.9212 | 0 | 0 | 0 | 1 Ref |
| MG945279 | Unassigned | Unassigned | Unassigned | 1267_0 | Clustered           | 7 VC_1267_0   | 7   | 1      | 1          | 1      | 0 | 0 | 0 | 1 Ref |
| MG945280 | Unassigned | Unassigned | Unassigned | 1282_0 | Clustered           | 3 VC_1282_0   | 3   | 1      | 1          | 1      | 0 | 0 | 0 | 1 Ref |
| MG945282 | Unassigned | Unassigned | Unassigned | 1243_0 | Clustered           | 52 VC_1243_0  | 52  | 0.9126 | 0.92708311 | 0.8461 | 0 | 0 | 0 | 1 Ref |
| MG945284 | Unassigned | Unassigned | Unassigned | 1197_0 | Clustered           | 15 VC_1197_0  | 15  | 0.8991 | 0.76608394 | 0.6888 | 0 | 0 | 0 | 1 Ref |
| MG945285 | Unassigned | Unassigned | Unassigned | 1281_0 | Clustered           | 7 VC_1281_0   | 7   | 0.9212 | 0.99995294 | 0.9212 | 0 | 0 | 0 | 1 Ref |
| MG945286 | Unassigned | Unassigned | Unassigned | 1125_0 | Clustered           | 20 VC_1125_0  | 20  | 0.5599 | 1          | 0.5599 | 0 | 0 | 0 | 1 Ref |
| MG945309 | Unassigned | Unassigned | Unassigned | 1197_0 | Clustered           | 15 VC_1197_0  | 15  | 0.8991 | 0.76608394 | 0.6888 | 0 | 0 | 0 | 1 Ref |
| MG945314 | Unassigned | Unassigned | Unassigned | 1263_0 | Clustered           | 2 VC_1263_0   | 2   | 1      | 1          | 1      | 0 | 0 | 0 | 1 Ref |
| MG945316 | Unassigned | Unassigned | Unassigned | 1285_0 | Clustered           | 25 VC_1285_0  | 25  | 1      | 1          | 1      | 0 | 0 | 0 | 1 Ref |
| MG945318 | Unassigned | Unassigned | Unassigned | 1104_0 | Clustered           | 154 VC_1104_0 | 154 | 0.8484 | 1          | 0.8484 | 0 | 0 | 0 | 1 Ref |
| MG945319 | Unassigned | Unassigned | Unassigned | 1125_0 | Clustered           | 20 VC_1125_0  | 20  | 0.5599 | 1          | 0.5599 | 0 | 0 | 0 | 1 Ref |
| MG945320 | Unassigned | Unassigned | Unassigned | 1139_0 | Clustered           | 4 VC_1139_0   | 4   | 1      | 1          | 1      | 0 | 0 | 0 | 1 Ref |
| MG945323 | Unassigned | Unassigned | Unassigned | 1251_0 | Clustered           | 15 VC_1251_0  | 15  | 0.9082 | 1          | 0.9082 | 0 | 0 | 0 | 1 Ref |
| MG945324 | Unassigned | Unassigned | Unassigned | 198_0  | Clustered           | 28 VC_198_0   | 28  | 0.2429 | 0.99971175 | 0.2429 | 0 | 0 | 0 | 1 Ref |
| MG945325 | Unassigned | Unassigned | Unassigned | 1104_0 | Clustered           | 154 VC_1104_0 | 154 | 0.8484 | 1          | 0.8484 | 0 | 0 | 0 | 1 Ref |
| MG945327 | Unassigned | Unassigned | Unassigned | 1194_0 | Clustered           | 5 VC_1194_0   | 5   | 0.5236 | 0.99999899 | 0.5236 | 0 | 0 | 0 | 1 Ref |
| MG945328 | Unassigned | Unassigned | Unassigned | 1286_0 | Clustered/Singleton | 1 VC_1286_0   | 1   | 0      | 1          | 0      | 0 | 0 | 0 | 1 Ref |
| MG945329 | Unassigned | Unassigned | Unassigned | 1259_0 | Clustered           | 8 VC_1259_0   | 8   | 0.8225 | 1          | 0.8225 | 0 | 0 | 0 | 1 Ref |
| MG945330 | Unassigned | Unassigned | Unassigned | 1104_0 | Clustered           | 154 VC_1104_0 | 154 | 0.8484 | 1          | 0.8484 | 0 | 0 | 0 | 1 Ref |
| MG945331 | Unassigned | Unassigned | Unassigned | 1287_0 | Clustered           | 7 VC_1287_0   | 7   | 1      | 1          | 1      | 0 | 0 | 0 | 1 Ref |
| MG945332 | Unassigned | Unassigned | Unassigned | 1251_0 | Clustered           | 15 VC_1251_0  | 15  | 0.9082 | 1          | 0.9082 | 0 | 0 | 0 | 1 Ref |
| MG945333 | Unassigned | Unassigned | Unassigned | 1104_0 | Clustered           | 154 VC_1104_0 | 154 | 0.8484 | 1          | 0.8484 | 0 | 0 | 0 | 1 Ref |
| MG945334 | Unassigned | Unassigned | Unassigned | 1127_0 | Clustered           | 19 VC_1127_0  | 19  | 0.7611 | 1          | 0.7611 | 0 | 0 | 0 | 1 Ref |
| MG945335 | Unassigned | Unassigned | Unassigned | 1288_0 | Clustered           | 3 VC_1288_0   | 3   | 1      | 1          | 1      | 0 | 0 | 0 | 1 Ref |
| MG945336 | Unassigned | Unassigned | Unassigned | 1289_0 | Clustered           | 2 VC_1289_0   | 2   | 0.4661 | 0.85557782 | 0.3987 | 0 | 0 | 0 | 1 Ref |
| MG945337 | Unassigned | Unassigned | Unassigned | 1290_0 | Clustered           | 2 VC_1290_0   | 2   | 1      | 1          | 1      | 0 | 0 | 0 | 1 Ref |
| MG945338 | Unassigned | Unassigned | Unassigned | 1125_0 | Clustered           | 20 VC_1125_0  | 20  | 0.5599 | 1          | 0.5599 | 0 | 0 | 0 | 1 Ref |
| MG945339 | Unassigned | Unassigned | Unassigned | 1116_0 | Clustered           | 14 VC_1116_0  | 14  | 0.7927 | 1          | 0.7927 | 0 | 0 | 0 | 1 Ref |
| MG945341 | Unassigned | Unassigned | Unassigned | 672_0  | Clustered           | 12 VC_672_0   | 12  | 1      | 1          | 1      | 0 | 0 | 0 | 1 Ref |
| MG945343 | Unassigned | Unassigned | Unassigned | 1287_0 | Clustered           | 7 VC_1287_0   | 7   | 1      | 1          | 1      | 0 | 0 | 0 | 1 Ref |
| MG945344 | Unassigned | Unassigned | Unassigned | 1285_0 | Clustered           | 25 VC_1285_0  | 25  | 1      | 1          | 1      | 0 | 0 | 0 | 1 Ref |
| MG945345 | Unassigned | Unassigned | Unassigned | 1291_0 | Clustered           | 2 VC_1291_0   | 2   | 1      | 1          | 1      | 0 | 0 | 0 | 1 Ref |
| MG945346 | Unassigned | Unassigned | Unassigned | 1104_0 | Clustered           | 154 VC_1104_0 | 154 | 0.8484 | 1          | 0.8484 | 0 | 0 | 0 | 1 Ref |



|          |            |            |            |        |           |               |     |        |            |        |   |   |   |       |
|----------|------------|------------|------------|--------|-----------|---------------|-----|--------|------------|--------|---|---|---|-------|
| MG945347 | Unassigned | Unassigned | Unassigned | 1125_0 | Clustered | 20 VC_1125_0  | 20  | 0.5599 | 1          | 0.5599 | 0 | 0 | 0 | 1 Ref |
| MG945348 | Unassigned | Unassigned | Unassigned | 1292_0 | Clustered | 3 VC_1292_0   | 3   | 1      | 1          | 1      | 0 | 0 | 0 | 1 Ref |
| MG945349 | Unassigned | Unassigned | Unassigned | 1261_0 | Clustered | 5 VC_1261_0   | 5   | 0.765  | 0.99993003 | 0.7649 | 0 | 0 | 0 | 1 Ref |
| MG945350 | Unassigned | Unassigned | Unassigned | 1293_0 | Clustered | 4 VC_1293_0   | 4   | 0.7847 | 0.99289298 | 0.7791 | 0 | 0 | 0 | 1 Ref |
| MG945351 | Unassigned | Unassigned | Unassigned | 1104_0 | Clustered | 154 VC_1104_0 | 154 | 0.8484 | 1          | 0.8484 | 0 | 0 | 0 | 1 Ref |
| MG945352 | Unassigned | Unassigned | Unassigned | 1193_0 | Clustered | 3 VC_1193_0   | 3   | 0.5473 | 0.99523779 | 0.5447 | 0 | 0 | 0 | 1 Ref |
| MG945354 | Unassigned | Unassigned | Unassigned | 1294_0 | Clustered | 6 VC_1294_0   | 6   | 0.6626 | 0.99999272 | 0.6626 | 0 | 0 | 0 | 1 Ref |
| MG945355 | Unassigned | Unassigned | Unassigned | 1104_0 | Clustered | 154 VC_1104_0 | 154 | 0.8484 | 1          | 0.8484 | 0 | 0 | 0 | 1 Ref |
| MG945357 | Unassigned | Unassigned | Unassigned | 1148_0 | Clustered | 16 VC_1148_0  | 16  | 0.8821 | 1          | 0.8821 | 0 | 0 | 0 | 1 Ref |
| MG945360 | Unassigned | Unassigned | Unassigned | 1295_0 | Clustered | 3 VC_1295_0   | 3   | 1      | 0          | 0      | 0 | 0 | 0 | 1 Ref |
| MG945361 | Unassigned | Unassigned | Unassigned | 1104_0 | Clustered | 154 VC_1104_0 | 154 | 0.8484 | 1          | 0.8484 | 0 | 0 | 0 | 1 Ref |
| MG945362 | Unassigned | Unassigned | Unassigned | 1296_0 | Clustered | 4 VC_1296_0   | 4   | 0.8684 | 0.91151676 | 0.7915 | 0 | 0 | 0 | 1 Ref |
| MG945363 | Unassigned | Unassigned | Unassigned | 1104_0 | Clustered | 154 VC_1104_0 | 154 | 0.8484 | 1          | 0.8484 | 0 | 0 | 0 | 1 Ref |
| MG945364 | Unassigned | Unassigned | Unassigned | 1144_0 | Clustered | 7 VC_1144_0   | 7   | 0.7076 | 1          | 0.7076 | 0 | 0 | 0 | 1 Ref |
| MG945365 | Unassigned | Unassigned | Unassigned | 1259_0 | Clustered | 8 VC_1259_0   | 8   | 0.8225 | 1          | 0.8225 | 0 | 0 | 0 | 1 Ref |
| MG945381 | Unassigned | Unassigned | Unassigned | 1126_0 | Clustered | 8 VC_1126_0   | 8   | 0.2864 | 1          | 0.2864 | 0 | 0 | 0 | 1 Ref |
| MG945382 | Unassigned | Unassigned | Unassigned | 1126_0 | Clustered | 8 VC_1126_0   | 8   | 0.2864 | 1          | 0.2864 | 0 | 0 | 0 | 1 Ref |
| MG945383 | Unassigned | Unassigned | Unassigned | 1127_0 | Clustered | 19 VC_1127_0  | 19  | 0.7611 | 1          | 0.7611 | 0 | 0 | 0 | 1 Ref |
| MG945384 | Unassigned | Unassigned | Unassigned | 1247_0 | Clustered | 7 VC_1247_0   | 7   | 0.9086 | 0.99998959 | 0.9086 | 0 | 0 | 0 | 1 Ref |
| MG945385 | Unassigned | Unassigned | Unassigned | 1125_0 | Clustered | 20 VC_1125_0  | 20  | 0.5599 | 1          | 0.5599 | 0 | 0 | 0 | 1 Ref |
| MG945386 | Unassigned | Unassigned | Unassigned | 1108_0 | Clustered | 4 VC_1108_0   | 4   | 0.0485 | 0.99999021 | 0.0485 | 0 | 0 | 0 | 1 Ref |
| MG945387 | Unassigned | Unassigned | Unassigned | 1104_0 | Clustered | 154 VC_1104_0 | 154 | 0.8484 | 1          | 0.8484 | 0 | 0 | 0 | 1 Ref |
| MG945388 | Unassigned | Unassigned | Unassigned | 1127_0 | Clustered | 19 VC_1127_0  | 19  | 0.7611 | 1          | 0.7611 | 0 | 0 | 0 | 1 Ref |
| MG945389 | Unassigned | Unassigned | Unassigned | 1125_0 | Clustered | 20 VC_1125_0  | 20  | 0.5599 | 1          | 0.5599 | 0 | 0 | 0 | 1 Ref |
| MG945390 | Unassigned | Unassigned | Unassigned | 1243_0 | Clustered | 52 VC_1243_0  | 52  | 0.9126 | 0.92708311 | 0.8461 | 0 | 0 | 0 | 1 Ref |
| MG945391 | Unassigned | Unassigned | Unassigned | 1124_0 | Clustered | 10 VC_1124_0  | 10  | 0.6268 | 1          | 0.6268 | 0 | 0 | 0 | 1 Ref |
| MG945392 | Unassigned | Unassigned | Unassigned | 1272_0 | Clustered | 5 VC_1272_0   | 5   | 1      | 1          | 1      | 0 | 0 | 0 | 1 Ref |
| MG945393 | Unassigned | Unassigned | Unassigned | 1104_0 | Clustered | 154 VC_1104_0 | 154 | 0.8484 | 1          | 0.8484 | 0 | 0 | 0 | 1 Ref |
| MG945394 | Unassigned | Unassigned | Unassigned | 1116_0 | Clustered | 14 VC_1116_0  | 14  | 0.7927 | 1          | 0.7927 | 0 | 0 | 0 | 1 Ref |
| MG945395 | Unassigned | Unassigned | Unassigned | 1297_0 | Clustered | 7 VC_1297_0   | 7   | 1      | 1          | 1      | 0 | 0 | 0 | 1 Ref |
| MG945396 | Unassigned | Unassigned | Unassigned | 1243_0 | Clustered | 52 VC_1243_0  | 52  | 0.9126 | 0.92708311 | 0.8461 | 0 | 0 | 0 | 1 Ref |
| MG945397 | Unassigned | Unassigned | Unassigned | 1298_0 | Clustered | 3 VC_1298_0   | 3   | 0.4889 | 0.98167473 | 0.4799 | 0 | 0 | 0 | 1 Ref |
| MG945398 | Unassigned | Unassigned | Unassigned | 1104_0 | Clustered | 154 VC_1104_0 | 154 | 0.8484 | 1          | 0.8484 | 0 | 0 | 0 | 1 Ref |
| MG945401 | Unassigned | Unassigned | Unassigned | 1251_0 | Clustered | 15 VC_1251_0  | 15  | 0.9082 | 1          | 0.9082 | 0 | 0 | 0 | 1 Ref |
| MG945402 | Unassigned | Unassigned | Unassigned | 1104_0 | Clustered | 154 VC_1104_0 | 154 | 0.8484 | 1          | 0.8484 | 0 | 0 | 0 | 1 Ref |
| MG945403 | Unassigned | Unassigned | Unassigned | 1116_0 | Clustered | 14 VC_1116_0  | 14  | 0.7927 | 1          | 0.7927 | 0 | 0 | 0 | 1 Ref |
| MG945404 | Unassigned | Unassigned | Unassigned | 1267_0 | Clustered | 7 VC_1267_0   | 7   | 1      | 1          | 1      | 0 | 0 | 0 | 1 Ref |
| MG945405 | Unassigned | Unassigned | Unassigned | 1146_0 | Clustered | 3 VC_1146_0   | 3   | 0.3641 | 0.99867077 | 0.3636 | 0 | 0 | 0 | 1 Ref |
| MG945407 | Unassigned | Unassigned | Unassigned | 1104_0 | Clustered | 154 VC_1104_0 | 154 | 0.8484 | 1          | 0.8484 | 0 | 0 | 0 | 1 Ref |
| MG945408 | Unassigned | Unassigned | Unassigned | 1266_0 | Clustered | 5 VC_1266_0   | 5   | 1      | 1          | 1      | 0 | 0 | 0 | 1 Ref |
| MG945409 | Unassigned | Unassigned | Unassigned | 1299_0 | Clustered | 2 VC_1299_0   | 2   | 1      | 1          | 1      | 0 | 0 | 0 | 1 Ref |
| MG945410 | Unassigned | Unassigned | Unassigned | 1125_0 | Clustered | 20 VC_1125_0  | 20  | 0.5599 | 1          | 0.5599 | 0 | 0 | 0 | 1 Ref |
| MG945411 | Unassigned | Unassigned | Unassigned | 1261_0 | Clustered | 5 VC_1261_0   | 5   | 0.765  | 0.99993003 | 0.7649 | 0 | 0 | 0 | 1 Ref |
| MG945412 | Unassigned | Unassigned | Unassigned | 1300_0 | Clustered | 2 VC_1300_0   | 2   | 0.664  | 0.72985431 | 0.4846 | 0 | 0 | 0 | 1 Ref |
| MG945413 | Unassigned | Unassigned | Unassigned | 1148_0 | Clustered | 16 VC_1148_0  | 16  | 0.8821 | 1          | 0.8821 | 0 | 0 | 0 | 1 Ref |
| MG945414 | Unassigned | Unassigned | Unassigned | 1253_0 | Clustered | 6 VC_1253_0   | 6   | 0.6097 | 1          | 0.6097 | 0 | 0 | 0 | 1 Ref |
| MG945415 | Unassigned | Unassigned | Unassigned | 1104_0 | Clustered | 154 VC_1104_0 | 154 | 0.8484 | 1          | 0.8484 | 0 | 0 | 0 | 1 Ref |
| MG945416 | Unassigned | Unassigned | Unassigned | 1125_0 | Clustered | 20 VC_1125_0  | 20  | 0.5599 | 1          | 0.5599 | 0 | 0 | 0 | 1 Ref |
| MG945417 | Unassigned | Unassigned | Unassigned | 1301_0 | Clustered | 2 VC_1301_0   | 2   | 1      | 1          | 1      | 0 | 0 | 0 | 1 Ref |
| MG945418 | Unassigned | Unassigned | Unassigned | 1154_0 | Clustered | 5 VC_1154_0   | 5   | 1      | 1          | 1      | 0 | 0 | 0 | 1 Ref |
| MG945419 | Unassigned | Unassigned | Unassigned | 1301_0 | Clustered | 2 VC_1301_0   | 2   | 1      | 1          | 1      | 0 | 0 | 0 | 1 Ref |
| MG945420 | Unassigned | Unassigned | Unassigned | 1264_0 | Clustered | 6 VC_1264_0   | 6   | 0.7062 | 0.92055725 | 0.6501 | 0 | 0 | 0 | 1 Ref |
| MG945421 | Unassigned | Unassigned | Unassigned | 1297_0 | Clustered | 7 VC_1297_0   | 7   | 1      | 1          | 1      | 0 | 0 | 0 | 1 Ref |
| MG945424 | Unassigned | Unassigned | Unassigned | 1104_0 | Clustered | 154 VC_1104_0 | 154 | 0.8484 | 1          | 0.8484 | 0 | 0 | 0 | 1 Ref |
| MG945425 | Unassigned | Unassigned | Unassigned | 1278_0 | Clustered | 3 VC_1278_0   | 3   | 0.3961 | 0.99705286 | 0.395  | 0 | 0 | 0 | 1 Ref |
| MG945426 | Unassigned | Unassigned | Unassigned | 1151_0 | Clustered | 9 VC_1151_0   | 9   | 0.8548 | 1          | 0.8548 | 0 | 0 | 0 | 1 Ref |
| MG945427 | Unassigned | Unassigned | Unassigned | 1302_0 | Clustered | 3 VC_1302_0   | 3   | 1      | 1          | 1      | 0 | 0 | 0 | 1 Ref |
| MG945429 | Unassigned | Unassigned | Unassigned | 1104_0 | Clustered | 154 VC_1104_0 | 154 | 0.8484 | 1          | 0.8484 | 0 | 0 | 0 | 1 Ref |
| MG945430 | Unassigned | Unassigned | Unassigned | 1127_0 | Clustered | 19 VC_1127_0  | 19  | 0.7611 | 1          | 0.7611 | 0 | 0 | 0 | 1 Ref |
| MG945432 | Unassigned | Unassigned | Unassigned | 1293_0 | Clustered | 4 VC_1293_0   | 4   | 0.7847 | 0.99289298 | 0.7791 | 0 | 0 | 0 | 1 Ref |
| MG945433 | Unassigned | Unassigned | Unassigned | 1197_0 | Clustered | 15 VC_1197_0  | 15  | 0.8991 | 0.76608394 | 0.6888 | 0 | 0 | 0 | 1 Ref |
| MG945434 | Unassigned | Unassigned | Unassigned | 1279_0 | Clustered | 4 VC_1279_0   | 4   | 0.6058 | 0.76972092 | 0.4663 | 0 | 0 | 0 | 1 Ref |
| MG945435 | Unassigned | Unassigned | Unassigned | 1104_0 | Clustered | 154 VC_1104_0 | 154 | 0.8484 | 1          | 0.8484 | 0 | 0 | 0 | 1 Ref |
| MG945437 | Unassigned | Unassigned | Unassigned | 1125_0 | Clustered | 20 VC_1125_0  | 20  | 0.5599 | 1          | 0.5599 | 0 | 0 | 0 | 1 Ref |
| MG945438 | Unassigned | Unassigned | Unassigned | 1104_0 | Clustered | 154 VC_1104_0 | 154 | 0.8484 | 1          | 0.8484 | 0 | 0 | 0 | 1 Ref |
| MG945439 | Unassigned | Unassigned | Unassigned | 1303_0 | Clustered | 6 VC_1303_0   | 6   | 1      | 1          | 1      | 0 | 0 | 0 | 1 Ref |
| MG945441 | Unassigned | Unassigned | Unassigned | 1149_0 | Clustered | 5 VC_1149_0   | 5   | 0.4768 | 0.9999998  | 0.4768 | 0 | 0 | 0 | 1 Ref |
| MG945444 | Unassigned | Unassigned | Unassigned | 1104_0 | Clustered | 154 VC_1104_0 | 154 | 0.8484 | 1          | 0.8484 | 0 | 0 | 0 | 1 Ref |
| MG945445 | Unassigned | Unassigned | Unassigned | 1253_0 | Clustered | 6 VC_1253_0   | 6   | 0.6097 | 1          | 0.6097 | 0 | 0 | 0 | 1 Ref |
| MG945447 | Unassigned | Unassigned | Unassigned | 1127_0 | Clustered | 19 VC_1127_0  | 19  | 0.7611 | 1          | 0.7611 | 0 | 0 | 0 | 1 Ref |
| MG945448 | Unassigned | Unassigned | Unassigned | 1256_0 | Clustered | 4 VC_1256_0   | 4   | 0.581  | 0.94751743 | 0.5505 | 0 | 0 | 0 | 1 Ref |
| MG945449 | Unassigned | Unassigned | Unassigned | 1257_0 | Clustered | 6 VC_1257_0   | 6   | 0.6517 | 0.99999969 | 0.6517 | 0 | 0 | 0 | 1 Ref |
| MG945452 | Unassigned | Unassigned | Unassigned | 1243_0 | Clustered | 52 VC_1243_0  | 52  | 0.9126 | 0.92708311 | 0.8461 | 0 | 0 | 0 | 1 Ref |
| MG945453 | Unassigned | Unassigned | Unassigned | 1211_0 | Clustered | 25 VC_1211_0  | 25  | 1      | 1          | 1      | 0 | 0 | 0 | 1 Ref |
| MG945455 | Unassigned | Unassigned | Unassigned | 1211_0 | Clustered | 25 VC_1211_0  | 25  | 1      | 1          | 1      | 0 | 0 | 0 | 1 Ref |
| MG945456 | Unassigned | Unassigned | Unassigned | 1211_0 | Clustered | 25 VC_1211_0  | 25  | 1      | 1          | 1      | 0 | 0 | 0 | 1 Ref |
| MG945457 | Unassigned | Unassigned | Unassigned | 1233_0 | Clustered | 16 VC_1233_0  | 16  | 0.8971 | 1          | 0.8971 | 0 | 0 | 0 | 1 Ref |
| MG945458 | Unassigned | Unassigned | Unassigned | 1257_0 | Clustered | 6 VC_1257_0   | 6   | 0.6517 | 0.99999969 | 0.6517 | 0 | 0 | 0 | 1 Ref |
| MG945459 | Unassigned | Unassigned | Unassigned | 1104_0 | Clustered | 154 VC_1104_0 | 154 | 0.8484 | 1          | 0.8484 | 0 | 0 | 0 | 1 Ref |
| MG945460 | Unassigned | Unassigned | Unassigned | 1255_0 | Clustered | 4 VC_1255_0   | 4   | 0.248  | 0.99828153 | 0.2476 | 0 | 0 | 0 | 1 Ref |
| MG945461 | Unassigned | Unassigned | Unassigned | 1104_0 | Clustered | 154 VC_1104_0 | 154 | 0.8484 | 1          | 0.8484 | 0 | 0 | 0 | 1 Ref |



|          |            |            |            |        |           |               |     |        |            |        |   |   |   |       |
|----------|------------|------------|------------|--------|-----------|---------------|-----|--------|------------|--------|---|---|---|-------|
| MG945462 | Unassigned | Unassigned | Unassigned | 1261_0 | Clustered | 5 VC_1261_0   | 5   | 0.765  | 0.99993003 | 0.7649 | 0 | 0 | 0 | 1 Ref |
| MG945463 | Unassigned | Unassigned | Unassigned | 1062_0 | Clustered | 45 VC_1062_0  | 45  | 0.9734 | 0.50949847 | 0.4959 | 0 | 0 | 0 | 1 Ref |
| MG945464 | Unassigned | Unassigned | Unassigned | 1245_0 | Clustered | 2 VC_1245_0   | 2   | 1      | 1          | 1      | 0 | 0 | 0 | 1 Ref |
| MG945465 | Unassigned | Unassigned | Unassigned | 995_0  | Clustered | 69 VC_995_0   | 69  | 0.8547 | 1          | 0.8547 | 0 | 0 | 0 | 1 Ref |
| MG945467 | Unassigned | Unassigned | Unassigned | 1104_0 | Clustered | 154 VC_1104_0 | 154 | 0.8484 | 1          | 0.8484 | 0 | 0 | 0 | 1 Ref |
| MG945468 | Unassigned | Unassigned | Unassigned | 1285_0 | Clustered | 25 VC_1285_0  | 25  | 1      | 1          | 1      | 0 | 0 | 0 | 1 Ref |
| MG945469 | Unassigned | Unassigned | Unassigned | 1305_0 | Clustered | 5 VC_1305_0   | 5   | 0.7701 | 0.66985041 | 0.5159 | 0 | 0 | 0 | 1 Ref |
| MG945470 | Unassigned | Unassigned | Unassigned | 1264_0 | Clustered | 6 VC_1264_0   | 6   | 0.7062 | 0.92055725 | 0.6501 | 0 | 0 | 0 | 1 Ref |
| MG945472 | Unassigned | Unassigned | Unassigned | 1119_0 | Clustered | 20 VC_1119_0  | 20  | 0.6751 | 0.99997892 | 0.6751 | 0 | 0 | 0 | 1 Ref |
| MG945473 | Unassigned | Unassigned | Unassigned | 1054_0 | Clustered | 12 VC_1054_0  | 12  | 0.2863 | 0.99746644 | 0.2855 | 0 | 0 | 0 | 1 Ref |
| MG945475 | Unassigned | Unassigned | Unassigned | 1085_0 | Clustered | 2 VC_1085_0   | 2   | 0.5907 | 0.9331928  | 0.5513 | 0 | 0 | 0 | 1 Ref |
| MG945476 | Unassigned | Unassigned | Unassigned | 1104_0 | Clustered | 154 VC_1104_0 | 154 | 0.8484 | 1          | 0.8484 | 0 | 0 | 0 | 1 Ref |
| MG945477 | Unassigned | Unassigned | Unassigned | 995_0  | Clustered | 69 VC_995_0   | 69  | 0.8547 | 1          | 0.8547 | 0 | 0 | 0 | 1 Ref |
| MG945478 | Unassigned | Unassigned | Unassigned | 1295_0 | Clustered | 3 VC_1295_0   | 3   | 1      | 0          | 0      | 0 | 0 | 0 | 1 Ref |
| MG945480 | Unassigned | Unassigned | Unassigned | 1297_0 | Clustered | 7 VC_1297_0   | 7   | 1      | 1          | 1      | 0 | 0 | 0 | 1 Ref |
| MG945481 | Unassigned | Unassigned | Unassigned | 1117_0 | Clustered | 5 VC_1117_0   | 5   | 0.4688 | 0.99999974 | 0.4688 | 0 | 0 | 0 | 1 Ref |
| MG945482 | Unassigned | Unassigned | Unassigned | 1247_0 | Clustered | 7 VC_1247_0   | 7   | 0.9086 | 0.99998959 | 0.9086 | 0 | 0 | 0 | 1 Ref |
| MG945483 | Unassigned | Unassigned | Unassigned | 1306_0 | Clustered | 2 VC_1306_0   | 2   | 1      | 1          | 1      | 0 | 0 | 0 | 1 Ref |
| MG945485 | Unassigned | Unassigned | Unassigned | 1243_0 | Clustered | 52 VC_1243_0  | 52  | 0.9126 | 0.92708311 | 0.8461 | 0 | 0 | 0 | 1 Ref |
| MG945486 | Unassigned | Unassigned | Unassigned | 1104_0 | Clustered | 154 VC_1104_0 | 154 | 0.8484 | 1          | 0.8484 | 0 | 0 | 0 | 1 Ref |
| MG945487 | Unassigned | Unassigned | Unassigned | 1149_0 | Clustered | 5 VC_1149_0   | 5   | 0.4768 | 0.99999998 | 0.4768 | 0 | 0 | 0 | 1 Ref |
| MG945488 | Unassigned | Unassigned | Unassigned | 1276_0 | Clustered | 7 VC_1276_0   | 7   | 0.8695 | 0.99982476 | 0.8693 | 0 | 0 | 0 | 1 Ref |
| MG945489 | Unassigned | Unassigned | Unassigned | 1111_0 | Clustered | 2 VC_1111_0   | 2   | 0.2635 | 0.89847992 | 0.2367 | 0 | 0 | 0 | 1 Ref |
| MG945490 | Unassigned | Unassigned | Unassigned | 1287_0 | Clustered | 7 VC_1287_0   | 7   | 1      | 1          | 1      | 0 | 0 | 0 | 1 Ref |
| MG945492 | Unassigned | Unassigned | Unassigned | 1281_0 | Clustered | 7 VC_1281_0   | 7   | 0.9212 | 0.99995294 | 0.9212 | 0 | 0 | 0 | 1 Ref |
| MG945494 | Unassigned | Unassigned | Unassigned | 1277_0 | Clustered | 14 VC_1277_0  | 14  | 0.8218 | 1          | 0.8218 | 0 | 0 | 0 | 1 Ref |
| MG945495 | Unassigned | Unassigned | Unassigned | 1261_0 | Clustered | 5 VC_1261_0   | 5   | 0.765  | 0.99993003 | 0.7649 | 0 | 0 | 0 | 1 Ref |
| MG945496 | Unassigned | Unassigned | Unassigned | 1255_0 | Clustered | 4 VC_1255_0   | 4   | 0.248  | 0.99828153 | 0.2476 | 0 | 0 | 0 | 1 Ref |
| MG945498 | Unassigned | Unassigned | Unassigned | 1211_0 | Clustered | 25 VC_1211_0  | 25  | 1      | 1          | 1      | 0 | 0 | 0 | 1 Ref |
| MG945499 | Unassigned | Unassigned | Unassigned | 1104_0 | Clustered | 154 VC_1104_0 | 154 | 0.8484 | 1          | 0.8484 | 0 | 0 | 0 | 1 Ref |
| MG945500 | Unassigned | Unassigned | Unassigned | 1308_0 | Clustered | 12 VC_1308_0  | 12  | 0.8184 | 0.9810731  | 0.8029 | 0 | 0 | 0 | 1 Ref |
| MG945501 | Unassigned | Unassigned | Unassigned | 1287_0 | Clustered | 7 VC_1287_0   | 7   | 1      | 1          | 1      | 0 | 0 | 0 | 1 Ref |
| MG945502 | Unassigned | Unassigned | Unassigned | 1197_0 | Clustered | 15 VC_1197_0  | 15  | 0.8991 | 0.76608394 | 0.6888 | 0 | 0 | 0 | 1 Ref |
| MG945504 | Unassigned | Unassigned | Unassigned | 1310_0 | Clustered | 2 VC_1310_0   | 2   | 1      | 1          | 1      | 0 | 0 | 0 | 1 Ref |
| MG945505 | Unassigned | Unassigned | Unassigned | 1149_0 | Clustered | 5 VC_1149_0   | 5   | 0.4768 | 0.99999998 | 0.4768 | 0 | 0 | 0 | 1 Ref |
| MG945506 | Unassigned | Unassigned | Unassigned | 1148_0 | Clustered | 16 VC_1148_0  | 16  | 0.8821 | 1          | 0.8821 | 0 | 0 | 0 | 1 Ref |
| MG945507 | Unassigned | Unassigned | Unassigned | 1148_0 | Clustered | 16 VC_1148_0  | 16  | 0.8821 | 1          | 0.8821 | 0 | 0 | 0 | 1 Ref |
| MG945508 | Unassigned | Unassigned | Unassigned | 1104_0 | Clustered | 154 VC_1104_0 | 154 | 0.8484 | 1          | 0.8484 | 0 | 0 | 0 | 1 Ref |
| MG945509 | Unassigned | Unassigned | Unassigned | 1211_0 | Clustered | 25 VC_1211_0  | 25  | 1      | 1          | 1      | 0 | 0 | 0 | 1 Ref |
| MG945511 | Unassigned | Unassigned | Unassigned | 1243_0 | Clustered | 52 VC_1243_0  | 52  | 0.9126 | 0.92708311 | 0.8461 | 0 | 0 | 0 | 1 Ref |
| MG945512 | Unassigned | Unassigned | Unassigned | 1259_0 | Clustered | 8 VC_1259_0   | 8   | 0.8225 | 1          | 0.8225 | 0 | 0 | 0 | 1 Ref |
| MG945514 | Unassigned | Unassigned | Unassigned | 1127_0 | Clustered | 19 VC_1127_0  | 19  | 0.7611 | 1          | 0.7611 | 0 | 0 | 0 | 1 Ref |
| MG945515 | Unassigned | Unassigned | Unassigned | 1243_0 | Clustered | 52 VC_1243_0  | 52  | 0.9126 | 0.92708311 | 0.8461 | 0 | 0 | 0 | 1 Ref |
| MG945517 | Unassigned | Unassigned | Unassigned | 1104_0 | Clustered | 154 VC_1104_0 | 154 | 0.8484 | 1          | 0.8484 | 0 | 0 | 0 | 1 Ref |
| MG945518 | Unassigned | Unassigned | Unassigned | 1264_0 | Clustered | 6 VC_1264_0   | 6   | 0.7062 | 0.92055725 | 0.6501 | 0 | 0 | 0 | 1 Ref |
| MG945519 | Unassigned | Unassigned | Unassigned | 1138_0 | Clustered | 4 VC_1138_0   | 4   | 0.9437 | 0.98964986 | 0.934  | 0 | 0 | 0 | 1 Ref |
| MG945520 | Unassigned | Unassigned | Unassigned | 672_0  | Clustered | 12 VC_672_0   | 12  | 1      | 1          | 1      | 0 | 0 | 0 | 1 Ref |
| MG945523 | Unassigned | Unassigned | Unassigned | 1230_0 | Clustered | 3 VC_1230_0   | 3   | 0.4802 | 0.82711071 | 0.3971 | 0 | 0 | 0 | 1 Ref |
| MG945524 | Unassigned | Unassigned | Unassigned | 1285_0 | Clustered | 25 VC_1285_0  | 25  | 1      | 1          | 1      | 0 | 0 | 0 | 1 Ref |
| MG945525 | Unassigned | Unassigned | Unassigned | 1144_0 | Clustered | 7 VC_1144_0   | 7   | 0.7076 | 1          | 0.7076 | 0 | 0 | 0 | 1 Ref |
| MG945526 | Unassigned | Unassigned | Unassigned | 1104_0 | Clustered | 154 VC_1104_0 | 154 | 0.8484 | 1          | 0.8484 | 0 | 0 | 0 | 1 Ref |
| MG945529 | Unassigned | Unassigned | Unassigned | 1311_0 | Clustered | 5 VC_1311_0   | 5   | 0.8316 | 0.99879053 | 0.8306 | 0 | 0 | 0 | 1 Ref |
| MG945533 | Unassigned | Unassigned | Unassigned | 1312_0 | Clustered | 3 VC_1312_0   | 3   | 1      | 1          | 1      | 0 | 0 | 0 | 1 Ref |
| MG945534 | Unassigned | Unassigned | Unassigned | 1119_0 | Clustered | 20 VC_1119_0  | 20  | 0.6751 | 0.99997892 | 0.6751 | 0 | 0 | 0 | 1 Ref |
| MG945538 | Unassigned | Unassigned | Unassigned | 1125_0 | Clustered | 20 VC_1125_0  | 20  | 0.5599 | 1          | 0.5599 | 0 | 0 | 0 | 1 Ref |
| MG945539 | Unassigned | Unassigned | Unassigned | 1297_0 | Clustered | 7 VC_1297_0   | 7   | 1      | 1          | 1      | 0 | 0 | 0 | 1 Ref |
| MG945540 | Unassigned | Unassigned | Unassigned | 1259_0 | Clustered | 8 VC_1259_0   | 8   | 0.8225 | 1          | 0.8225 | 0 | 0 | 0 | 1 Ref |
| MG945541 | Unassigned | Unassigned | Unassigned | 1104_0 | Clustered | 154 VC_1104_0 | 154 | 0.8484 | 1          | 0.8484 | 0 | 0 | 0 | 1 Ref |
| MG945542 | Unassigned | Unassigned | Unassigned | 1116_0 | Clustered | 14 VC_1116_0  | 14  | 0.7927 | 1          | 0.7927 | 0 | 0 | 0 | 1 Ref |
| MG945544 | Unassigned | Unassigned | Unassigned | 1252_0 | Clustered | 3 VC_1252_0   | 3   | 0.3237 | 0.99790393 | 0.323  | 0 | 0 | 0 | 1 Ref |
| MG945546 | Unassigned | Unassigned | Unassigned | 198_0  | Clustered | 28 VC_198_0   | 28  | 0.2429 | 0.99971175 | 0.2429 | 0 | 0 | 0 | 1 Ref |
| MG945548 | Unassigned | Unassigned | Unassigned | 1104_0 | Clustered | 154 VC_1104_0 | 154 | 0.8484 | 1          | 0.8484 | 0 | 0 | 0 | 1 Ref |
| MG945549 | Unassigned | Unassigned | Unassigned | 1154_0 | Clustered | 5 VC_1154_0   | 5   | 1      | 1          | 1      | 0 | 0 | 0 | 1 Ref |
| MG945550 | Unassigned | Unassigned | Unassigned | 1116_0 | Clustered | 14 VC_1116_0  | 14  | 0.7927 | 1          | 0.7927 | 0 | 0 | 0 | 1 Ref |
| MG945551 | Unassigned | Unassigned | Unassigned | 672_0  | Clustered | 12 VC_672_0   | 12  | 1      | 1          | 1      | 0 | 0 | 0 | 1 Ref |
| MG945554 | Unassigned | Unassigned | Unassigned | 1319_0 | Clustered | 2 VC_1319_0   | 2   | 1      | 1          | 1      | 0 | 0 | 0 | 1 Ref |
| MG945556 | Unassigned | Unassigned | Unassigned | 1285_0 | Clustered | 25 VC_1285_0  | 25  | 1      | 1          | 1      | 0 | 0 | 0 | 1 Ref |
| MG945557 | Unassigned | Unassigned | Unassigned | 1233_0 | Clustered | 16 VC_1233_0  | 16  | 0.8971 | 1          | 0.8971 | 0 | 0 | 0 | 1 Ref |
| MG945559 | Unassigned | Unassigned | Unassigned | 1104_0 | Clustered | 154 VC_1104_0 | 154 | 0.8484 | 1          | 0.8484 | 0 | 0 | 0 | 1 Ref |
| MG945560 | Unassigned | Unassigned | Unassigned | 1056_0 | Clustered | 4 VC_1056_0   | 4   | 0.169  | 0.84110627 | 0.1421 | 0 | 0 | 0 | 1 Ref |
| MG945561 | Unassigned | Unassigned | Unassigned | 1139_0 | Clustered | 4 VC_1139_0   | 4   | 1      | 1          | 1      | 0 | 0 | 0 | 1 Ref |
| MG945562 | Unassigned | Unassigned | Unassigned | 1285_0 | Clustered | 25 VC_1285_0  | 25  | 1      | 1          | 1      | 0 | 0 | 0 | 1 Ref |
| MG945563 | Unassigned | Unassigned | Unassigned | 1277_0 | Clustered | 14 VC_1277_0  | 14  | 0.8218 | 1          | 0.8218 | 0 | 0 | 0 | 1 Ref |
| MG945564 | Unassigned | Unassigned | Unassigned | 1211_0 | Clustered | 25 VC_1211_0  | 25  | 1      | 1          | 1      | 0 | 0 | 0 | 1 Ref |
| MG945565 | Unassigned | Unassigned | Unassigned | 1104_0 | Clustered | 154 VC_1104_0 | 154 | 0.8484 | 1          | 0.8484 | 0 | 0 | 0 | 1 Ref |
| MG945566 | Unassigned | Unassigned | Unassigned | 1104_0 | Clustered | 154 VC_1104_0 | 154 | 0.8484 | 1          | 0.8484 | 0 | 0 | 0 | 1 Ref |
| MG945567 | Unassigned | Unassigned | Unassigned | 1274_0 | Clustered | 2 VC_1274_0   | 2   | 0.6386 | 0.72985431 | 0.4661 | 0 | 0 | 0 | 1 Ref |
| MG945568 | Unassigned | Unassigned | Unassigned | 1311_0 | Clustered | 5 VC_1311_0   | 5   | 0.8316 | 0.99879053 | 0.8306 | 0 | 0 | 0 | 1 Ref |
| MG945569 | Unassigned | Unassigned | Unassigned | 1122_0 | Clustered | 10 VC_1122_0  | 10  | 0.9643 | 0.99999697 | 0.9643 | 0 | 0 | 0 | 1 Ref |
| MG945570 | Unassigned | Unassigned | Unassigned | 1104_0 | Clustered | 154 VC_1104_0 | 154 | 0.8484 | 1          | 0.8484 | 0 | 0 | 0 | 1 Ref |
| MG945571 | Unassigned | Unassigned | Unassigned | 198_0  | Clustered | 28 VC_198_0   | 28  | 0.2429 | 0.99971175 | 0.2429 | 0 | 0 | 0 | 1 Ref |



|          |            |            |            |        |                     |               |     |        |            |        |   |   |   |       |
|----------|------------|------------|------------|--------|---------------------|---------------|-----|--------|------------|--------|---|---|---|-------|
| MG945572 | Unassigned | Unassigned | Unassigned | 1276_0 | Clustered           | 7 VC_1276_0   | 7   | 0.8695 | 0.99982476 | 0.8693 | 0 | 0 | 0 | 1 Ref |
| MG945573 | Unassigned | Unassigned | Unassigned | 1143_0 | Clustered           | 9 VC_1143_0   | 9   | 0.7268 | 1          | 0.7268 | 0 | 0 | 0 | 1 Ref |
| MG945574 | Unassigned | Unassigned | Unassigned | 1302_0 | Clustered           | 3 VC_1302_0   | 3   | 1      | 1          | 1      | 0 | 0 | 0 | 1 Ref |
| MG945575 | Unassigned | Unassigned | Unassigned | 1319_0 | Clustered           | 2 VC_1319_0   | 2   | 1      | 1          | 1      | 0 | 0 | 0 | 1 Ref |
| MG945576 | Unassigned | Unassigned | Unassigned | 1294_0 | Clustered           | 6 VC_1294_0   | 6   | 0.6626 | 0.99999272 | 0.6626 | 0 | 0 | 0 | 1 Ref |
| MG945578 | Unassigned | Unassigned | Unassigned | 1253_0 | Clustered           | 6 VC_1253_0   | 6   | 0.6097 | 1          | 0.6097 | 0 | 0 | 0 | 1 Ref |
| MG945579 | Unassigned | Unassigned | Unassigned | 1285_0 | Clustered           | 25 VC_1285_0  | 25  | 1      | 1          | 1      | 0 | 0 | 0 | 1 Ref |
| MG945580 | Unassigned | Unassigned | Unassigned | 1258_0 | Clustered           | 3 VC_1258_0   | 3   | 0.2422 | 0.85925819 | 0.2081 | 0 | 0 | 0 | 1 Ref |
| MG945582 | Unassigned | Unassigned | Unassigned | 1268_0 | Clustered           | 3 VC_1268_0   | 3   | 0.0807 | 0.6862532  | 0.0554 | 0 | 0 | 0 | 1 Ref |
| MG945584 | Unassigned | Unassigned | Unassigned | 1275_0 | Clustered           | 4 VC_1275_0   | 4   | 1      | 1          | 1      | 0 | 0 | 0 | 1 Ref |
| MG945585 | Unassigned | Unassigned | Unassigned | 1277_0 | Clustered           | 14 VC_1277_0  | 14  | 0.8218 | 1          | 0.8218 | 0 | 0 | 0 | 1 Ref |
| MG945586 | Unassigned | Unassigned | Unassigned | 1104_0 | Clustered           | 154 VC_1104_0 | 154 | 0.8484 | 1          | 0.8484 | 0 | 0 | 0 | 1 Ref |
| MG945587 | Unassigned | Unassigned | Unassigned | 1104_0 | Clustered           | 154 VC_1104_0 | 154 | 0.8484 | 1          | 0.8484 | 0 | 0 | 0 | 1 Ref |
| MG945589 | Unassigned | Unassigned | Unassigned | 1104_0 | Clustered           | 154 VC_1104_0 | 154 | 0.8484 | 1          | 0.8484 | 0 | 0 | 0 | 1 Ref |
| MG945591 | Unassigned | Unassigned | Unassigned | 1113_0 | Clustered/Singleton | 1 VC_1113_0   | 1   | 0      | 1          | 0      | 0 | 0 | 0 | 1 Ref |
| MG945594 | Unassigned | Unassigned | Unassigned | 1053_0 | Clustered/Singleton | 1 VC_1053_0   | 1   | 0      | 1          | 0      | 0 | 0 | 0 | 1 Ref |
| MG945596 | Unassigned | Unassigned | Unassigned | 1104_0 | Clustered           | 154 VC_1104_0 | 154 | 0.8484 | 1          | 0.8484 | 0 | 0 | 0 | 1 Ref |
| MG945597 | Unassigned | Unassigned | Unassigned | 1105_0 | Clustered           | 3 VC_1105_0   | 3   | 0.0755 | 0.99466875 | 0.0751 | 0 | 0 | 0 | 1 Ref |
| MG945602 | Unassigned | Unassigned | Unassigned | 1104_0 | Clustered           | 154 VC_1104_0 | 154 | 0.8484 | 1          | 0.8484 | 0 | 0 | 0 | 1 Ref |
| MG945605 | Unassigned | Unassigned | Unassigned | 1281_0 | Clustered           | 7 VC_1281_0   | 7   | 0.9212 | 0.99995294 | 0.9212 | 0 | 0 | 0 | 1 Ref |
| MG945609 | Unassigned | Unassigned | Unassigned | 1148_0 | Clustered           | 16 VC_1148_0  | 16  | 0.8821 | 1          | 0.8821 | 0 | 0 | 0 | 1 Ref |
| MG945611 | Unassigned | Unassigned | Unassigned | 1253_0 | Clustered           | 6 VC_1253_0   | 6   | 0.6097 | 1          | 0.6097 | 0 | 0 | 0 | 1 Ref |
| MG945612 | Unassigned | Unassigned | Unassigned | 1285_0 | Clustered           | 25 VC_1285_0  | 25  | 1      | 1          | 1      | 0 | 0 | 0 | 1 Ref |
| MG945613 | Unassigned | Unassigned | Unassigned | 1119_0 | Clustered           | 20 VC_1119_0  | 20  | 0.6751 | 0.99997892 | 0.6751 | 0 | 0 | 0 | 1 Ref |
| MG945614 | Unassigned | Unassigned | Unassigned | 1295_0 | Clustered           | 3 VC_1295_0   | 3   | 1      | 0          | 0      | 0 | 0 | 0 | 1 Ref |
| MG945615 | Unassigned | Unassigned | Unassigned | 1322_0 | Clustered           | 2 VC_1322_0   | 2   | 1      | 1          | 1      | 0 | 0 | 0 | 1 Ref |
| MG945616 | Unassigned | Unassigned | Unassigned | 1197_0 | Clustered           | 15 VC_1197_0  | 15  | 0.8991 | 0.76608394 | 0.6888 | 0 | 0 | 0 | 1 Ref |
| MG945617 | Unassigned | Unassigned | Unassigned | 1310_0 | Clustered           | 2 VC_1310_0   | 2   | 1      | 1          | 1      | 0 | 0 | 0 | 1 Ref |
| MG945618 | Unassigned | Unassigned | Unassigned | 1243_0 | Clustered           | 52 VC_1243_0  | 52  | 0.9126 | 0.92708311 | 0.8461 | 0 | 0 | 0 | 1 Ref |
| MG945619 | Unassigned | Unassigned | Unassigned | 1324_0 | Clustered           | 4 VC_1324_0   | 4   | 0.6008 | 0.54407361 | 0.3269 | 0 | 0 | 0 | 1 Ref |
| MG945620 | Unassigned | Unassigned | Unassigned | 1137_0 | Clustered           | 3 VC_1137_0   | 3   | 0.9176 | 0.93067968 | 0.854  | 0 | 0 | 0 | 1 Ref |
| MG945621 | Unassigned | Unassigned | Unassigned | 1308_0 | Clustered           | 12 VC_1308_0  | 12  | 0.8184 | 0.9810731  | 0.8029 | 0 | 0 | 0 | 1 Ref |
| MG945622 | Unassigned | Unassigned | Unassigned | 1255_0 | Clustered           | 4 VC_1255_0   | 4   | 0.248  | 0.99828153 | 0.2476 | 0 | 0 | 0 | 1 Ref |
| MG945623 | Unassigned | Unassigned | Unassigned | 1194_0 | Clustered           | 5 VC_1194_0   | 5   | 0.5236 | 0.99999899 | 0.5236 | 0 | 0 | 0 | 1 Ref |
| MG945625 | Unassigned | Unassigned | Unassigned | 1250_0 | Clustered           | 5 VC_1250_0   | 5   | 0.6384 | 0.99918945 | 0.6379 | 0 | 0 | 0 | 1 Ref |
| MG945628 | Unassigned | Unassigned | Unassigned | 1303_0 | Clustered           | 6 VC_1303_0   | 6   | 1      | 1          | 1      | 0 | 0 | 0 | 1 Ref |
| MG945629 | Unassigned | Unassigned | Unassigned | 1250_0 | Clustered           | 5 VC_1250_0   | 5   | 0.6384 | 0.99918945 | 0.6379 | 0 | 0 | 0 | 1 Ref |
| MG945631 | Unassigned | Unassigned | Unassigned | 1274_0 | Clustered           | 2 VC_1274_0   | 2   | 0.6386 | 0.72985431 | 0.4661 | 0 | 0 | 0 | 1 Ref |
| MG945632 | Unassigned | Unassigned | Unassigned | 1250_0 | Clustered           | 5 VC_1250_0   | 5   | 0.6384 | 0.99918945 | 0.6379 | 0 | 0 | 0 | 1 Ref |
| MG945633 | Unassigned | Unassigned | Unassigned | 1250_0 | Clustered           | 5 VC_1250_0   | 5   | 0.6384 | 0.99918945 | 0.6379 | 0 | 0 | 0 | 1 Ref |
| MG945634 | Unassigned | Unassigned | Unassigned | 1243_0 | Clustered           | 52 VC_1243_0  | 52  | 0.9126 | 0.92708311 | 0.8461 | 0 | 0 | 0 | 1 Ref |
| MG945635 | Unassigned | Unassigned | Unassigned | 1125_0 | Clustered           | 20 VC_1125_0  | 20  | 0.5599 | 1          | 0.5599 | 0 | 0 | 0 | 1 Ref |
| MG945637 | Unassigned | Unassigned | Unassigned | 1294_0 | Clustered           | 6 VC_1294_0   | 6   | 0.6626 | 0.99999272 | 0.6626 | 0 | 0 | 0 | 1 Ref |
| MG945639 | Unassigned | Unassigned | Unassigned | 1125_0 | Clustered           | 20 VC_1125_0  | 20  | 0.5599 | 1          | 0.5599 | 0 | 0 | 0 | 1 Ref |
| MG945640 | Unassigned | Unassigned | Unassigned | 1285_0 | Clustered           | 25 VC_1285_0  | 25  | 1      | 1          | 1      | 0 | 0 | 0 | 1 Ref |
| MG945641 | Unassigned | Unassigned | Unassigned | 1243_0 | Clustered           | 52 VC_1243_0  | 52  | 0.9126 | 0.92708311 | 0.8461 | 0 | 0 | 0 | 1 Ref |
| MG945642 | Unassigned | Unassigned | Unassigned | 1127_0 | Clustered           | 19 VC_1127_0  | 19  | 0.7611 | 1          | 0.7611 | 0 | 0 | 0 | 1 Ref |
| MG945643 | Unassigned | Unassigned | Unassigned | 1256_0 | Clustered           | 4 VC_1256_0   | 4   | 0.581  | 0.94751743 | 0.5505 | 0 | 0 | 0 | 1 Ref |
| MG945644 | Unassigned | Unassigned | Unassigned | 1140_0 | Clustered           | 4 VC_1140_0   | 4   | 0.1325 | 0.66207199 | 0.0877 | 0 | 0 | 0 | 1 Ref |
| MG945645 | Unassigned | Unassigned | Unassigned | 1116_0 | Clustered           | 14 VC_1116_0  | 14  | 0.7927 | 1          | 0.7927 | 0 | 0 | 0 | 1 Ref |
| MG945646 | Unassigned | Unassigned | Unassigned | 1104_0 | Clustered           | 154 VC_1104_0 | 154 | 0.8484 | 1          | 0.8484 | 0 | 0 | 0 | 1 Ref |
| MG945647 | Unassigned | Unassigned | Unassigned | 1243_0 | Clustered           | 52 VC_1243_0  | 52  | 0.9126 | 0.92708311 | 0.8461 | 0 | 0 | 0 | 1 Ref |
| MG945662 | Unassigned | Unassigned | Unassigned | 1257_0 | Clustered           | 6 VC_1257_0   | 6   | 0.6517 | 0.99999969 | 0.6517 | 0 | 0 | 0 | 1 Ref |
| MG945663 | Unassigned | Unassigned | Unassigned | 995_0  | Clustered           | 69 VC_995_0   | 69  | 0.8547 | 1          | 0.8547 | 0 | 0 | 0 | 1 Ref |
| MG945664 | Unassigned | Unassigned | Unassigned | 1211_0 | Clustered           | 25 VC_1211_0  | 25  | 1      | 1          | 1      | 0 | 0 | 0 | 1 Ref |
| MG945665 | Unassigned | Unassigned | Unassigned | 1287_0 | Clustered           | 7 VC_1287_0   | 7   | 1      | 1          | 1      | 0 | 0 | 0 | 1 Ref |
| MG945667 | Unassigned | Unassigned | Unassigned | 1232_0 | Clustered           | 2 VC_1232_0   | 2   | 0.4709 | 0.85557782 | 0.4029 | 0 | 0 | 0 | 1 Ref |
| MG945668 | Unassigned | Unassigned | Unassigned | 1285_0 | Clustered           | 25 VC_1285_0  | 25  | 1      | 1          | 1      | 0 | 0 | 0 | 1 Ref |
| MG945669 | Unassigned | Unassigned | Unassigned | 198_0  | Clustered           | 28 VC_198_0   | 28  | 0.2429 | 0.99971175 | 0.2429 | 0 | 0 | 0 | 1 Ref |
| MG945670 | Unassigned | Unassigned | Unassigned | 1077_0 | Clustered           | 48 VC_1077_0  | 48  | 0.8525 | 1          | 0.8525 | 0 | 0 | 0 | 1 Ref |
| MG945671 | Unassigned | Unassigned | Unassigned | 1104_0 | Clustered           | 154 VC_1104_0 | 154 | 0.8484 | 1          | 0.8484 | 0 | 0 | 0 | 1 Ref |
| MG945673 | Unassigned | Unassigned | Unassigned | 1104_0 | Clustered           | 154 VC_1104_0 | 154 | 0.8484 | 1          | 0.8484 | 0 | 0 | 0 | 1 Ref |
| MG945674 | Unassigned | Unassigned | Unassigned | 1104_0 | Clustered           | 154 VC_1104_0 | 154 | 0.8484 | 1          | 0.8484 | 0 | 0 | 0 | 1 Ref |
| MG945676 | Unassigned | Unassigned | Unassigned | 1148_0 | Clustered           | 16 VC_1148_0  | 16  | 0.8821 | 1          | 0.8821 | 0 | 0 | 0 | 1 Ref |
| MG945677 | Unassigned | Unassigned | Unassigned | 1230_0 | Clustered           | 3 VC_1230_0   | 3   | 0.4802 | 0.82711071 | 0.3971 | 0 | 0 | 0 | 1 Ref |
| MG945678 | Unassigned | Unassigned | Unassigned | 1155_0 | Clustered           | 2 VC_1155_0   | 2   | 1      | 1          | 1      | 0 | 0 | 0 | 1 Ref |
| MG945680 | Unassigned | Unassigned | Unassigned | 1211_0 | Clustered           | 25 VC_1211_0  | 25  | 1      | 1          | 1      | 0 | 0 | 0 | 1 Ref |
| MG945681 | Unassigned | Unassigned | Unassigned | 1104_0 | Clustered           | 154 VC_1104_0 | 154 | 0.8484 | 1          | 0.8484 | 0 | 0 | 0 | 1 Ref |
| MG945682 | Unassigned | Unassigned | Unassigned | 398_0  | Clustered           | 48 VC_398_0   | 48  | 0.4813 | 1          | 0.4813 | 0 | 0 | 0 | 1 Ref |
| MG945683 | Unassigned | Unassigned | Unassigned | 1211_0 | Clustered           | 25 VC_1211_0  | 25  | 1      | 1          | 1      | 0 | 0 | 0 | 1 Ref |
| MG945685 | Unassigned | Unassigned | Unassigned | 1251_0 | Clustered           | 15 VC_1251_0  | 15  | 0.9082 | 1          | 0.9082 | 0 | 0 | 0 | 1 Ref |
| MG945686 | Unassigned | Unassigned | Unassigned | 672_0  | Clustered           | 12 VC_672_0   | 12  | 1      | 1          | 1      | 0 | 0 | 0 | 1 Ref |
| MG945687 | Unassigned | Unassigned | Unassigned | 1259_0 | Clustered           | 8 VC_1259_0   | 8   | 0.8225 | 1          | 0.8225 | 0 | 0 | 0 | 1 Ref |
| MG945689 | Unassigned | Unassigned | Unassigned | 1122_0 | Clustered           | 10 VC_1122_0  | 10  | 0.9643 | 0.99999697 | 0.9643 | 0 | 0 | 0 | 1 Ref |
| MG945690 | Unassigned | Unassigned | Unassigned | 1326_0 | Clustered           | 2 VC_1326_0   | 2   | 1      | 1          | 1      | 0 | 0 | 0 | 1 Ref |
| MG945691 | Unassigned | Unassigned | Unassigned | 1104_0 | Clustered           | 154 VC_1104_0 | 154 | 0.8484 | 1          | 0.8484 | 0 | 0 | 0 | 1 Ref |
| MG945692 | Unassigned | Unassigned | Unassigned | 1247_0 | Clustered           | 7 VC_1247_0   | 7   | 0.9086 | 0.99998959 | 0.9086 | 0 | 0 | 0 | 1 Ref |
| MG945693 | Unassigned | Unassigned | Unassigned | 1138_0 | Clustered           | 4 VC_1138_0   | 4   | 0.9437 | 0.98964986 | 0.934  | 0 | 0 | 0 | 1 Ref |
| MG945694 | Unassigned | Unassigned | Unassigned | 1127_0 | Clustered           | 19 VC_1127_0  | 19  | 0.7611 | 1          | 0.7611 | 0 | 0 | 0 | 1 Ref |
| MG945696 | Unassigned | Unassigned | Unassigned | 1297_0 | Clustered           | 7 VC_1297_0   | 7   | 1      | 1          | 1      | 0 | 0 | 0 | 1 Ref |
| MG945697 | Unassigned | Unassigned | Unassigned | 1247_0 | Clustered           | 7 VC_1247_0   | 7   | 0.9086 | 0.99998959 | 0.9086 | 0 | 0 | 0 | 1 Ref |



|          |            |            |            |        |           |               |     |        |            |        |   |   |   |       |
|----------|------------|------------|------------|--------|-----------|---------------|-----|--------|------------|--------|---|---|---|-------|
| MG945698 | Unassigned | Unassigned | Unassigned | 1247_0 | Clustered | 7 VC_1247_0   | 7   | 0.9086 | 0.99998959 | 0.9086 | 0 | 0 | 0 | 1 Ref |
| MG945699 | Unassigned | Unassigned | Unassigned | 1104_0 | Clustered | 154 VC_1104_0 | 154 | 0.8484 | 1          | 0.8484 | 0 | 0 | 0 | 1 Ref |
| MG945702 | Unassigned | Unassigned | Unassigned | 1292_0 | Clustered | 3 VC_1292_0   | 3   | 1      | 1          | 1      | 0 | 0 | 0 | 1 Ref |
| MG945703 | Unassigned | Unassigned | Unassigned | 1054_0 | Clustered | 12 VC_1054_0  | 12  | 0.2863 | 0.99746644 | 0.2855 | 0 | 0 | 0 | 1 Ref |
| MG945704 | Unassigned | Unassigned | Unassigned | 1120_0 | Clustered | 7 VC_1120_0   | 7   | 0.2688 | 0.9951868  | 0.2675 | 0 | 0 | 0 | 1 Ref |
| MG945705 | Unassigned | Unassigned | Unassigned | 1104_0 | Clustered | 154 VC_1104_0 | 154 | 0.8484 | 1          | 0.8484 | 0 | 0 | 0 | 1 Ref |
| MG945706 | Unassigned | Unassigned | Unassigned | 1148_0 | Clustered | 16 VC_1148_0  | 16  | 0.8821 | 1          | 0.8821 | 0 | 0 | 0 | 1 Ref |
| MG945708 | Unassigned | Unassigned | Unassigned | 1104_0 | Clustered | 154 VC_1104_0 | 154 | 0.8484 | 1          | 0.8484 | 0 | 0 | 0 | 1 Ref |
| MG945710 | Unassigned | Unassigned | Unassigned | 1104_0 | Clustered | 154 VC_1104_0 | 154 | 0.8484 | 1          | 0.8484 | 0 | 0 | 0 | 1 Ref |
| MG945712 | Unassigned | Unassigned | Unassigned | 1285_0 | Clustered | 25 VC_1285_0  | 25  | 1      | 1          | 1      | 0 | 0 | 0 | 1 Ref |
| MG945713 | Unassigned | Unassigned | Unassigned | 1211_0 | Clustered | 25 VC_1211_0  | 25  | 1      | 1          | 1      | 0 | 0 | 0 | 1 Ref |
| MG945716 | Unassigned | Unassigned | Unassigned | 1211_0 | Clustered | 25 VC_1211_0  | 25  | 1      | 1          | 1      | 0 | 0 | 0 | 1 Ref |
| MG945717 | Unassigned | Unassigned | Unassigned | 1311_0 | Clustered | 5 VC_1311_0   | 5   | 0.8316 | 0.99879053 | 0.8306 | 0 | 0 | 0 | 1 Ref |
| MG945718 | Unassigned | Unassigned | Unassigned | 1110_0 | Clustered | 8 VC_1110_0   | 8   | 0.6915 | 1          | 0.6915 | 0 | 0 | 0 | 1 Ref |
| MG945719 | Unassigned | Unassigned | Unassigned | 1144_0 | Clustered | 7 VC_1144_0   | 7   | 0.7076 | 1          | 0.7076 | 0 | 0 | 0 | 1 Ref |
| MG945721 | Unassigned | Unassigned | Unassigned | 1139_0 | Clustered | 4 VC_1139_0   | 4   | 1      | 1          | 1      | 0 | 0 | 0 | 1 Ref |
| MG945723 | Unassigned | Unassigned | Unassigned | 1252_0 | Clustered | 3 VC_1252_0   | 3   | 0.3237 | 0.99790393 | 0.323  | 0 | 0 | 0 | 1 Ref |
| MG945724 | Unassigned | Unassigned | Unassigned | 1327_0 | Clustered | 4 VC_1327_0   | 4   | 1      | 1          | 1      | 0 | 0 | 0 | 1 Ref |
| MG945725 | Unassigned | Unassigned | Unassigned | 1233_0 | Clustered | 16 VC_1233_0  | 16  | 0.8971 | 1          | 0.8971 | 0 | 0 | 0 | 1 Ref |
| MG945726 | Unassigned | Unassigned | Unassigned | 1151_0 | Clustered | 9 VC_1151_0   | 9   | 0.8548 | 1          | 0.8548 | 0 | 0 | 0 | 1 Ref |
| MG945727 | Unassigned | Unassigned | Unassigned | 1152_0 | Clustered | 4 VC_1152_0   | 4   | 0.7206 | 0.99971165 | 0.7204 | 0 | 0 | 0 | 1 Ref |
| MG945728 | Unassigned | Unassigned | Unassigned | 1104_0 | Clustered | 154 VC_1104_0 | 154 | 0.8484 | 1          | 0.8484 | 0 | 0 | 0 | 1 Ref |
| MG945729 | Unassigned | Unassigned | Unassigned | 1287_0 | Clustered | 7 VC_1287_0   | 7   | 1      | 1          | 1      | 0 | 0 | 0 | 1 Ref |
| MG945730 | Unassigned | Unassigned | Unassigned | 1211_0 | Clustered | 25 VC_1211_0  | 25  | 1      | 1          | 1      | 0 | 0 | 0 | 1 Ref |
| MG945731 | Unassigned | Unassigned | Unassigned | 1104_0 | Clustered | 154 VC_1104_0 | 154 | 0.8484 | 1          | 0.8484 | 0 | 0 | 0 | 1 Ref |
| MG945733 | Unassigned | Unassigned | Unassigned | 1285_0 | Clustered | 25 VC_1285_0  | 25  | 1      | 1          | 1      | 0 | 0 | 0 | 1 Ref |
| MG945734 | Unassigned | Unassigned | Unassigned | 1247_0 | Clustered | 7 VC_1247_0   | 7   | 0.9086 | 0.99998959 | 0.9086 | 0 | 0 | 0 | 1 Ref |
| MG945735 | Unassigned | Unassigned | Unassigned | 1193_0 | Clustered | 3 VC_1193_0   | 3   | 0.5473 | 0.99523779 | 0.5447 | 0 | 0 | 0 | 1 Ref |
| MG945736 | Unassigned | Unassigned | Unassigned | 1116_0 | Clustered | 14 VC_1116_0  | 14  | 0.7927 | 1          | 0.7927 | 0 | 0 | 0 | 1 Ref |
| MG945738 | Unassigned | Unassigned | Unassigned | 1132_0 | Clustered | 2 VC_1132_0   | 2   | 0.0978 | 0.83194774 | 0.0814 | 0 | 0 | 0 | 1 Ref |
| MG945739 | Unassigned | Unassigned | Unassigned | 1311_0 | Clustered | 5 VC_1311_0   | 5   | 0.8316 | 0.99879053 | 0.8306 | 0 | 0 | 0 | 1 Ref |
| MG945740 | Unassigned | Unassigned | Unassigned | 1116_0 | Clustered | 14 VC_1116_0  | 14  | 0.7927 | 1          | 0.7927 | 0 | 0 | 0 | 1 Ref |
| MG945741 | Unassigned | Unassigned | Unassigned | 1137_0 | Clustered | 3 VC_1137_0   | 3   | 0.9176 | 0.93067968 | 0.854  | 0 | 0 | 0 | 1 Ref |
| MG945742 | Unassigned | Unassigned | Unassigned | 1114_0 | Clustered | 2 VC_1114_0   | 2   | 0.0522 | 0.94760452 | 0.0495 | 0 | 0 | 0 | 1 Ref |
| MG945743 | Unassigned | Unassigned | Unassigned | 1243_0 | Clustered | 52 VC_1243_0  | 52  | 0.9126 | 0.92708311 | 0.8461 | 0 | 0 | 0 | 1 Ref |
| MG945744 | Unassigned | Unassigned | Unassigned | 1104_0 | Clustered | 154 VC_1104_0 | 154 | 0.8484 | 1          | 0.8484 | 0 | 0 | 0 | 1 Ref |
| MG945745 | Unassigned | Unassigned | Unassigned | 1251_0 | Clustered | 15 VC_1251_0  | 15  | 0.9082 | 1          | 0.9082 | 0 | 0 | 0 | 1 Ref |
| MG945746 | Unassigned | Unassigned | Unassigned | 1125_0 | Clustered | 20 VC_1125_0  | 20  | 0.5599 | 1          | 0.5599 | 0 | 0 | 0 | 1 Ref |
| MG945747 | Unassigned | Unassigned | Unassigned | 1154_0 | Clustered | 5 VC_1154_0   | 5   | 1      | 1          | 1      | 0 | 0 | 0 | 1 Ref |
| MG945748 | Unassigned | Unassigned | Unassigned | 1196_0 | Clustered | 3 VC_1196_0   | 3   | 0.3378 | 0.99743975 | 0.3369 | 0 | 0 | 0 | 1 Ref |
| MG945750 | Unassigned | Unassigned | Unassigned | 1267_0 | Clustered | 7 VC_1267_0   | 7   | 1      | 1          | 1      | 0 | 0 | 0 | 1 Ref |
| MG945751 | Unassigned | Unassigned | Unassigned | 1281_0 | Clustered | 7 VC_1281_0   | 7   | 0.9212 | 0.99995294 | 0.9212 | 0 | 0 | 0 | 1 Ref |
| MG945752 | Unassigned | Unassigned | Unassigned | 1193_0 | Clustered | 3 VC_1193_0   | 3   | 0.5473 | 0.99523779 | 0.5447 | 0 | 0 | 0 | 1 Ref |
| MG945753 | Unassigned | Unassigned | Unassigned | 1127_0 | Clustered | 19 VC_1127_0  | 19  | 0.7611 | 1          | 0.7611 | 0 | 0 | 0 | 1 Ref |
| MG945754 | Unassigned | Unassigned | Unassigned | 1151_0 | Clustered | 9 VC_1151_0   | 9   | 0.8548 | 1          | 0.8548 | 0 | 0 | 0 | 1 Ref |
| MG945755 | Unassigned | Unassigned | Unassigned | 1293_0 | Clustered | 4 VC_1293_0   | 4   | 0.7847 | 0.99289298 | 0.7791 | 0 | 0 | 0 | 1 Ref |
| MG945756 | Unassigned | Unassigned | Unassigned | 672_0  | Clustered | 12 VC_672_0   | 12  | 1      | 1          | 1      | 0 | 0 | 0 | 1 Ref |
| MG945757 | Unassigned | Unassigned | Unassigned | 1233_0 | Clustered | 16 VC_1233_0  | 16  | 0.8971 | 1          | 0.8971 | 0 | 0 | 0 | 1 Ref |
| MG945758 | Unassigned | Unassigned | Unassigned | 1104_0 | Clustered | 154 VC_1104_0 | 154 | 0.8484 | 1          | 0.8484 | 0 | 0 | 0 | 1 Ref |
| MG945759 | Unassigned | Unassigned | Unassigned | 1143_0 | Clustered | 9 VC_1143_0   | 9   | 0.7268 | 1          | 0.7268 | 0 | 0 | 0 | 1 Ref |
| MG945760 | Unassigned | Unassigned | Unassigned | 1143_0 | Clustered | 9 VC_1143_0   | 9   | 0.7268 | 1          | 0.7268 | 0 | 0 | 0 | 1 Ref |
| MG945761 | Unassigned | Unassigned | Unassigned | 1104_0 | Clustered | 154 VC_1104_0 | 154 | 0.8484 | 1          | 0.8484 | 0 | 0 | 0 | 1 Ref |
| MG945764 | Unassigned | Unassigned | Unassigned | 1148_0 | Clustered | 16 VC_1148_0  | 16  | 0.8821 | 1          | 0.8821 | 0 | 0 | 0 | 1 Ref |
| MG945765 | Unassigned | Unassigned | Unassigned | 1104_0 | Clustered | 154 VC_1104_0 | 154 | 0.8484 | 1          | 0.8484 | 0 | 0 | 0 | 1 Ref |
| MG945766 | Unassigned | Unassigned | Unassigned | 1328_0 | Clustered | 2 VC_1328_0   | 2   | 1      | 1          | 1      | 0 | 0 | 0 | 1 Ref |
| MG945767 | Unassigned | Unassigned | Unassigned | 1125_0 | Clustered | 20 VC_1125_0  | 20  | 0.5599 | 1          | 0.5599 | 0 | 0 | 0 | 1 Ref |
| MG945768 | Unassigned | Unassigned | Unassigned | 1104_0 | Clustered | 154 VC_1104_0 | 154 | 0.8484 | 1          | 0.8484 | 0 | 0 | 0 | 1 Ref |
| MG945769 | Unassigned | Unassigned | Unassigned | 1329_0 | Clustered | 2 VC_1329_0   | 2   | 1      | 1          | 1      | 0 | 0 | 0 | 1 Ref |
| MG945770 | Unassigned | Unassigned | Unassigned | 1104_0 | Clustered | 154 VC_1104_0 | 154 | 0.8484 | 1          | 0.8484 | 0 | 0 | 0 | 1 Ref |
| MG945771 | Unassigned | Unassigned | Unassigned | 1116_0 | Clustered | 14 VC_1116_0  | 14  | 0.7927 | 1          | 0.7927 | 0 | 0 | 0 | 1 Ref |
| MG945774 | Unassigned | Unassigned | Unassigned | 1251_0 | Clustered | 15 VC_1251_0  | 15  | 0.9082 | 1          | 0.9082 | 0 | 0 | 0 | 1 Ref |
| MG945775 | Unassigned | Unassigned | Unassigned | 1108_0 | Clustered | 4 VC_1108_0   | 4   | 0.0485 | 0.99999021 | 0.0485 | 0 | 0 | 0 | 1 Ref |
| MG945776 | Unassigned | Unassigned | Unassigned | 1267_0 | Clustered | 7 VC_1267_0   | 7   | 1      | 1          | 1      | 0 | 0 | 0 | 1 Ref |
| MG945778 | Unassigned | Unassigned | Unassigned | 1288_0 | Clustered | 3 VC_1288_0   | 3   | 1      | 1          | 1      | 0 | 0 | 0 | 1 Ref |
| MG945780 | Unassigned | Unassigned | Unassigned | 1126_0 | Clustered | 8 VC_1126_0   | 8   | 0.2864 | 1          | 0.2864 | 0 | 0 | 0 | 1 Ref |
| MG945781 | Unassigned | Unassigned | Unassigned | 1127_0 | Clustered | 19 VC_1127_0  | 19  | 0.7611 | 1          | 0.7611 | 0 | 0 | 0 | 1 Ref |
| MG945782 | Unassigned | Unassigned | Unassigned | 1287_0 | Clustered | 7 VC_1287_0   | 7   | 1      | 1          | 1      | 0 | 0 | 0 | 1 Ref |
| MG945783 | Unassigned | Unassigned | Unassigned | 1110_0 | Clustered | 8 VC_1110_0   | 8   | 0.6915 | 1          | 0.6915 | 0 | 0 | 0 | 1 Ref |
| MG945784 | Unassigned | Unassigned | Unassigned | 1211_0 | Clustered | 25 VC_1211_0  | 25  | 1      | 1          | 1      | 0 | 0 | 0 | 1 Ref |
| MG945785 | Unassigned | Unassigned | Unassigned | 1152_0 | Clustered | 4 VC_1152_0   | 4   | 0.7206 | 0.99971165 | 0.7204 | 0 | 0 | 0 | 1 Ref |
| MG945786 | Unassigned | Unassigned | Unassigned | 1104_0 | Clustered | 154 VC_1104_0 | 154 | 0.8484 | 1          | 0.8484 | 0 | 0 | 0 | 1 Ref |
| MG945787 | Unassigned | Unassigned | Unassigned | 1104_0 | Clustered | 154 VC_1104_0 | 154 | 0.8484 | 1          | 0.8484 | 0 | 0 | 0 | 1 Ref |
| MG945788 | Unassigned | Unassigned | Unassigned | 1330_0 | Clustered | 2 VC_1330_0   | 2   | 1      | 1          | 1      | 0 | 0 | 0 | 1 Ref |
| MG945789 | Unassigned | Unassigned | Unassigned | 1278_0 | Clustered | 3 VC_1278_0   | 3   | 0.3961 | 0.99705286 | 0.395  | 0 | 0 | 0 | 1 Ref |
| MG945790 | Unassigned | Unassigned | Unassigned | 1211_0 | Clustered | 25 VC_1211_0  | 25  | 1      | 1          | 1      | 0 | 0 | 0 | 1 Ref |
| MG945791 | Unassigned | Unassigned | Unassigned | 1267_0 | Clustered | 7 VC_1267_0   | 7   | 1      | 1          | 1      | 0 | 0 | 0 | 1 Ref |
| MG945792 | Unassigned | Unassigned | Unassigned | 1329_0 | Clustered | 2 VC_1329_0   | 2   | 1      | 1          | 1      | 0 | 0 | 0 | 1 Ref |
| MG945793 | Unassigned | Unassigned | Unassigned | 1104_0 | Clustered | 154 VC_1104_0 | 154 | 0.8484 | 1          | 0.8484 | 0 | 0 | 0 | 1 Ref |
| MG945794 | Unassigned | Unassigned | Unassigned | 1197_0 | Clustered | 15 VC_1197_0  | 15  | 0.8991 | 0.76608394 | 0.6888 | 0 | 0 | 0 | 1 Ref |
| MG945795 | Unassigned | Unassigned | Unassigned | 1330_0 | Clustered | 2 VC_1330_0   | 2   | 1      | 1          | 1      | 0 | 0 | 0 | 1 Ref |
| MG945796 | Unassigned | Unassigned | Unassigned | 1104_0 | Clustered | 154 VC_1104_0 | 154 | 0.8484 | 1          | 0.8484 | 0 | 0 | 0 | 1 Ref |



|          |            |            |            |        |                     |               |     |        |            |        |   |   |   |            |
|----------|------------|------------|------------|--------|---------------------|---------------|-----|--------|------------|--------|---|---|---|------------|
| MG945797 | Unassigned | Unassigned | Unassigned | 1122_0 | Clustered           | 10 VC_1122_0  | 10  | 0.9643 | 0.99999697 | 0.9643 | 0 | 0 | 0 | 1 Ref      |
| MG945798 | Unassigned | Unassigned | Unassigned | 1331_0 | Clustered           | 4 VC_1331_0   | 4   | 0.7343 | 0.99899459 | 0.7335 | 0 | 0 | 0 | 1 Ref      |
| MG945799 | Unassigned | Unassigned | Unassigned | 1196_0 | Clustered           | 3 VC_1196_0   | 3   | 0.3378 | 0.99743975 | 0.3369 | 0 | 0 | 0 | 1 Ref      |
| MG945800 | Unassigned | Unassigned | Unassigned | 1196_0 | Clustered           | 3 VC_1196_0   | 3   | 0.3378 | 0.99743975 | 0.3369 | 0 | 0 | 0 | 1 Ref      |
| MG945801 | Unassigned | Unassigned | Unassigned | 1104_0 | Clustered           | 154 VC_1104_0 | 154 | 0.8484 | 1          | 0.8484 | 0 | 0 | 0 | 1 Ref      |
| MG945802 | Unassigned | Unassigned | Unassigned | 1104_0 | Clustered           | 154 VC_1104_0 | 154 | 0.8484 | 1          | 0.8484 | 0 | 0 | 0 | 1 Ref      |
| MG945803 | Unassigned | Unassigned | Unassigned | 1251_0 | Clustered           | 15 VC_1251_0  | 15  | 0.9082 | 1          | 0.9082 | 0 | 0 | 0 | 1 Ref      |
| MG945804 | Unassigned | Unassigned | Unassigned | 1258_0 | Clustered           | 3 VC_1258_0   | 3   | 0.2422 | 0.85925819 | 0.2081 | 0 | 0 | 0 | 1 Ref      |
| MG945805 | Unassigned | Unassigned | Unassigned | 1144_0 | Clustered           | 7 VC_1144_0   | 7   | 0.7076 | 1          | 0.7076 | 0 | 0 | 0 | 1 Ref      |
| MG945806 | Unassigned | Unassigned | Unassigned | 1285_0 | Clustered           | 25 VC_1285_0  | 25  | 1      | 1          | 1      | 0 | 0 | 0 | 1 Ref      |
| MG945807 | Unassigned | Unassigned | Unassigned | 1117_0 | Clustered           | 5 VC_1117_0   | 5   | 0.4688 | 0.99999974 | 0.4688 | 0 | 0 | 0 | 1 Ref      |
| MG945808 | Unassigned | Unassigned | Unassigned | 1333_0 | Clustered           | 2 VC_1333_0   | 2   | 1      | 1          | 1      | 0 | 0 | 0 | 1 Ref      |
| MG945809 | Unassigned | Unassigned | Unassigned | 1138_0 | Clustered           | 4 VC_1138_0   | 4   | 0.9437 | 0.98964986 | 0.934  | 0 | 0 | 0 | 1 Ref      |
| MG945810 | Unassigned | Unassigned | Unassigned | 1152_0 | Clustered           | 4 VC_1152_0   | 4   | 0.7206 | 0.99971165 | 0.7204 | 0 | 0 | 0 | 1 Ref      |
| MG945811 | Unassigned | Unassigned | Unassigned | 1143_0 | Clustered           | 9 VC_1143_0   | 9   | 0.7268 | 1          | 0.7268 | 0 | 0 | 0 | 1 Ref      |
| MG945812 | Unassigned | Unassigned | Unassigned | 1281_0 | Clustered           | 7 VC_1281_0   | 7   | 0.9212 | 0.99995294 | 0.9212 | 0 | 0 | 0 | 1 Ref      |
| MG945813 | Unassigned | Unassigned | Unassigned | 1211_0 | Clustered           | 25 VC_1211_0  | 25  | 1      | 1          | 1      | 0 | 0 | 0 | 1 Ref      |
| MG945814 | Unassigned | Unassigned | Unassigned | 1285_0 | Clustered           | 25 VC_1285_0  | 25  | 1      | 1          | 1      | 0 | 0 | 0 | 1 Ref      |
| MG945815 | Unassigned | Unassigned | Unassigned | 1257_0 | Clustered           | 6 VC_1257_0   | 6   | 0.6517 | 0.99999969 | 0.6517 | 0 | 0 | 0 | 1 Ref      |
| MG945816 | Unassigned | Unassigned | Unassigned | 1151_0 | Clustered           | 9 VC_1151_0   | 9   | 0.8548 | 1          | 0.8548 | 0 | 0 | 0 | 1 Ref      |
| MG945817 | Unassigned | Unassigned | Unassigned | 1148_0 | Clustered           | 16 VC_1148_0  | 16  | 0.8821 | 1          | 0.8821 | 0 | 0 | 0 | 1 Ref      |
| MG945818 | Unassigned | Unassigned | Unassigned | 1291_0 | Clustered           | 2 VC_1291_0   | 2   | 1      | 1          | 1      | 0 | 0 | 0 | 1 Ref      |
| MG945819 | Unassigned | Unassigned | Unassigned | 1116_0 | Clustered           | 14 VC_1116_0  | 14  | 0.7927 | 1          | 0.7927 | 0 | 0 | 0 | 1 Ref      |
| MG945820 | Unassigned | Unassigned | Unassigned | 1104_0 | Clustered           | 154 VC_1104_0 | 154 | 0.8484 | 1          | 0.8484 | 0 | 0 | 0 | 1 Ref      |
| MG945821 | Unassigned | Unassigned | Unassigned | 1334_0 | Clustered/Singleton | 1 VC_1334_0   | 1   | 0      | 1          | 0      | 0 | 0 | 0 | 1 Ref      |
| MG945822 | Unassigned | Unassigned | Unassigned | 1273_0 | Clustered           | 6 VC_1273_0   | 6   | 0.7385 | 0.9999804  | 0.7385 | 0 | 0 | 0 | 1 Ref      |
| MG945823 | Unassigned | Unassigned | Unassigned | 1328_0 | Clustered           | 2 VC_1328_0   | 2   | 1      | 1          | 1      | 0 | 0 | 0 | 1 Ref      |
| MG945824 | Unassigned | Unassigned | Unassigned | 1305_0 | Clustered           | 5 VC_1305_0   | 5   | 0.7701 | 0.66985041 | 0.5159 | 0 | 0 | 0 | 1 Ref      |
| MG945825 | Unassigned | Unassigned | Unassigned | 1281_0 | Clustered           | 7 VC_1281_0   | 7   | 0.9212 | 0.99995294 | 0.9212 | 0 | 0 | 0 | 1 Ref      |
| MG945826 | Unassigned | Unassigned | Unassigned | 1119_0 | Clustered           | 20 VC_1119_0  | 20  | 0.6751 | 0.99997892 | 0.6751 | 0 | 0 | 0 | 1 Ref      |
| MG945827 | Unassigned | Unassigned | Unassigned | 1146_0 | Clustered           | 3 VC_1146_0   | 3   | 0.3641 | 0.99867077 | 0.3636 | 0 | 0 | 0 | 1 Ref      |
| MG945828 | Unassigned | Unassigned | Unassigned | 1300_0 | Clustered           | 2 VC_1300_0   | 2   | 0.664  | 0.72985431 | 0.4846 | 0 | 0 | 0 | 1 Ref      |
| MG945829 | Unassigned | Unassigned | Unassigned | 1251_0 | Clustered           | 15 VC_1251_0  | 15  | 0.9082 | 1          | 0.9082 | 0 | 0 | 0 | 1 Ref      |
| MG945830 | Unassigned | Unassigned | Unassigned | 1255_0 | Clustered           | 4 VC_1255_0   | 4   | 0.248  | 0.99828153 | 0.2476 | 0 | 0 | 0 | 1 Ref      |
| MG945831 | Unassigned | Unassigned | Unassigned | 1335_0 | Clustered           | 7 VC_1335_0   | 7   | 0.8346 | 0.99999844 | 0.8346 | 0 | 0 | 0 | 1 Ref      |
| MG945832 | Unassigned | Unassigned | Unassigned | 1337_0 | Clustered           | 2 VC_1337_0   | 2   | 1      | 1          | 1      | 0 | 0 | 0 | 1 Ref      |
| MG945835 | Unassigned | Unassigned | Unassigned | 1059_0 | Clustered           | 3 VC_1059_0   | 3   | 0.3928 | 0.9839946  | 0.3865 | 0 | 0 | 0 | 1 Ref      |
| MG945836 | Unassigned | Unassigned | Unassigned | 1077_0 | Clustered           | 48 VC_1077_0  | 48  | 0.8525 | 1          | 0.8525 | 0 | 0 | 0 | 1 Ref      |
| MG945837 | Unassigned | Unassigned | Unassigned | 398_0  | Clustered           | 48 VC_398_0   | 48  | 0.4813 | 1          | 0.4813 | 0 | 0 | 0 | 1 Ref      |
| MG945838 | Unassigned | Unassigned | Unassigned | 995_0  | Clustered           | 69 VC_995_0   | 69  | 0.8547 | 1          | 0.8547 | 0 | 0 | 0 | 1 Ref      |
| MG945839 | Unassigned | Unassigned | Unassigned | 1338_0 | Clustered           | 4 VC_1338_0   | 4   | 1      | 1          | 1      | 0 | 0 | 0 | 1 Ref      |
| MG945840 | Unassigned | Unassigned | Unassigned | 1077_0 | Clustered           | 48 VC_1077_0  | 48  | 0.8525 | 1          | 0.8525 | 0 | 0 | 0 | 1 Ref      |
| MG945842 | Unassigned | Unassigned | Unassigned | 1339_0 | Clustered           | 7 VC_1339_0   | 7   | 0.9177 | 0.99772305 | 0.9156 | 0 | 0 | 0 | 1 Ref      |
| MG945843 | Unassigned | Unassigned | Unassigned | 995_0  | Clustered           | 69 VC_995_0   | 69  | 0.8547 | 1          | 0.8547 | 0 | 0 | 0 | 1 Ref      |
| MG945845 | Unassigned | Unassigned | Unassigned | 1211_0 | Clustered           | 25 VC_1211_0  | 25  | 1      | 1          | 1      | 0 | 0 | 0 | 1 Ref      |
| MG945846 | Unassigned | Unassigned | Unassigned | 1077_0 | Clustered           | 48 VC_1077_0  | 48  | 0.8525 | 1          | 0.8525 | 0 | 0 | 0 | 1 Ref      |
| MG945848 | Unassigned | Unassigned | Unassigned | 1266_0 | Clustered           | 5 VC_1266_0   | 5   | 1      | 1          | 1      | 0 | 0 | 0 | 1 Ref      |
| MG945849 | Unassigned | Unassigned | Unassigned | 1333_0 | Clustered           | 2 VC_1333_0   | 2   | 1      | 1          | 1      | 0 | 0 | 0 | 1 Ref      |
| MG945850 | Unassigned | Unassigned | Unassigned | 1340_0 | Clustered           | 5 VC_1340_0   | 5   | 1      | 1          | 1      | 0 | 0 | 0 | 1 Ref      |
| MG945852 | Unassigned | Unassigned | Unassigned | 1266_0 | Clustered           | 5 VC_1266_0   | 5   | 1      | 1          | 1      | 0 | 0 | 0 | 1 Ref      |
| MG945853 | Unassigned | Unassigned | Unassigned | 1104_0 | Clustered           | 154 VC_1104_0 | 154 | 0.8484 | 1          | 0.8484 | 0 | 0 | 0 | 1 Ref      |
| MG945855 | Unassigned | Unassigned | Unassigned | 1104_0 | Clustered           | 154 VC_1104_0 | 154 | 0.8484 | 1          | 0.8484 | 0 | 0 | 0 | 1 Ref      |
| MG945857 | Unassigned | Unassigned | Unassigned | 1342_0 | Clustered           | 3 VC_1342_0   | 3   | 1      | 1          | 1      | 0 | 0 | 0 | 1 Ref      |
| MG945858 | Unassigned | Unassigned | Unassigned | 1125_0 | Clustered           | 20 VC_1125_0  | 20  | 0.5599 | 1          | 0.5599 | 0 | 0 | 0 | 1 Ref      |
| MG945859 | Unassigned | Unassigned | Unassigned | 1342_0 | Clustered           | 3 VC_1342_0   | 3   | 1      | 1          | 1      | 0 | 0 | 0 | 1 Ref      |
| MG945862 | Unassigned | Unassigned | Unassigned | 1104_0 | Clustered           | 154 VC_1104_0 | 154 | 0.8484 | 1          | 0.8484 | 0 | 0 | 0 | 1 Ref      |
| MG945864 | Unassigned | Unassigned | Unassigned | 1104_0 | Clustered           | 154 VC_1104_0 | 154 | 0.8484 | 1          | 0.8484 | 0 | 0 | 0 | 1 Ref      |
| MG945866 | Unassigned | Unassigned | Unassigned | 1342_0 | Clustered           | 3 VC_1342_0   | 3   | 1      | 1          | 1      | 0 | 0 | 0 | 1 Ref      |
| MG945867 | Unassigned | Unassigned | Unassigned | 1124_0 | Clustered           | 10 VC_1124_0  | 10  | 0.6268 | 1          | 0.6268 | 0 | 0 | 0 | 1 Ref      |
| MG945869 | Unassigned | Unassigned | Unassigned | 1104_0 | Clustered           | 154 VC_1104_0 | 154 | 0.8484 | 1          | 0.8484 | 0 | 0 | 0 | 1 Ref      |
| MG945870 | Unassigned | Unassigned | Unassigned | 1122_0 | Clustered           | 10 VC_1122_0  | 10  | 0.9643 | 0.99999697 | 0.9643 | 0 | 0 | 0 | 1 Ref      |
| MG945909 | Unassigned | Unassigned | Unassigned | 1258_0 | Clustered           | 3 VC_1258_0   | 3   | 0.2422 | 0.85925819 | 0.2081 | 0 | 0 | 0 | 1 Ref      |
| MG957431 | Unassigned | Unassigned | Unassigned | 82_0   | Clustered           | 24 VC_82_0    | 24  | 0.7351 | 1          | 0.7351 | 0 | 0 | 0 | 1 Ref      |
| MG962360 | Unassigned | Unassigned | Unassigned | 1240_0 | Clustered           | 82 VC_1240_0  | 82  | 0.7945 | 1          | 0.7945 | 0 | 0 | 0 | 1 Ref      |
| MG962361 | Unassigned | Unassigned | Unassigned | 520_64 | Clustered/Singleton | 1 VC_520_64   | 1   | 0      | 1          | 0      | 0 | 0 | 0 | 1 Ref      |
| MG962362 | Unassigned | Unassigned | Unassigned | 371_3  | Clustered           | 22 VC_371_3   | 22  | 0.0787 | 1          | 0.0787 | 0 | 0 | 0 | 0.9048 Ref |
| MG962363 | Unassigned | Unassigned | Unassigned | 371_13 | Clustered           | 33 VC_371_13  | 33  | 0.179  | 1          | 0.179  | 0 | 0 | 0 | 0.8769 Ref |
| MG962364 | Unassigned | Unassigned | Unassigned | 236_0  | Clustered           | 72 VC_236_0   | 72  | 0.8104 | 1          | 0.8104 | 0 | 0 | 0 | 1 Ref      |
| MG962365 | Unassigned | Unassigned | Unassigned | 371_16 | Clustered           | 42 VC_371_16  | 42  | 0.1341 | 1          | 0.1341 | 0 | 0 | 0 | 0.7282 Ref |
| MG962367 | Unassigned | Unassigned | Unassigned | 1240_0 | Clustered           | 82 VC_1240_0  | 82  | 0.7945 | 1          | 0.7945 | 0 | 0 | 0 | 1 Ref      |
| MG962368 | Unassigned | Unassigned | Unassigned | 799_1  | Clustered           | 27 VC_799_1   | 27  | 0.8611 | 1          | 0.8611 | 0 | 0 | 0 | 1 Ref      |
| MG962369 | Unassigned | Unassigned | Unassigned | 799_1  | Clustered           | 27 VC_799_1   | 27  | 0.8611 | 1          | 0.8611 | 0 | 0 | 0 | 1 Ref      |
| MG962370 | Unassigned | Unassigned | Unassigned | 325_47 | Clustered           | 2 VC_325_47   | 2   | 0.0045 | 0.9575092  | 0.0043 | 0 | 0 | 0 | 1 Ref      |
| MG962371 | Unassigned | Unassigned | Unassigned | 236_0  | Clustered           | 72 VC_236_0   | 72  | 0.8104 | 1          | 0.8104 | 0 | 0 | 0 | 1 Ref      |
| MG962372 | Unassigned | Unassigned | Unassigned | 325_5  | Clustered           | 11 VC_325_5   | 11  | 0.047  | 1          | 0.047  | 0 | 0 | 0 | 0.7636 Ref |
| MG962373 | Unassigned | Unassigned | Unassigned | 517_1  | Clustered           | 108 VC_517_1  | 108 | 0.8483 | 1          | 0.8483 | 0 | 0 | 0 | 0.9955 Ref |
| MG962374 | Unassigned | Unassigned | Unassigned | 238_0  | Clustered           | 17 VC_238_0   | 17  | 0.6109 | 1          | 0.6109 | 0 | 0 | 0 | 1 Ref      |
| MG962375 | Unassigned | Unassigned | Unassigned | 371_2  | Clustered           | 8 VC_371_2    | 8   | 0.0232 | 1          | 0.0232 | 0 | 0 | 0 | 0.8571 Ref |
| MG962376 | Unassigned | Unassigned | Unassigned | 567_0  | Clustered           | 8 VC_567_0    | 8   | 0.4935 | 1          | 0.4935 | 0 | 0 | 0 | 1 Ref      |
| MG963916 | Unassigned | Unassigned | Unassigned | 772_16 | Clustered           | 10 VC_772_16  | 10  | 0.0563 | 0.9434928  | 0.0531 | 0 | 0 | 0 | 0.8667 Ref |
| MG966531 | Unassigned | Unassigned | Unassigned | 392_0  | Clustered           | 126 VC_392_0  | 126 | 0.9621 | 1          | 0.9621 | 0 | 0 | 0 | 1 Ref      |



|          |            |            |            |        |                     |              |     |        |            |        |   |   |   |            |
|----------|------------|------------|------------|--------|---------------------|--------------|-----|--------|------------|--------|---|---|---|------------|
| MC966533 | Unassigned | Unassigned | Unassigned | 277_0  | Clustered           | 3 VC_277_0   | 3   | 1      | 1          | 1      | 0 | 0 | 0 | 1 Ref      |
| MC967616 | Unassigned | Unassigned | Unassigned | 1006_0 | Clustered           | 8 VC_1006_0  | 8   | 0.7407 | 1          | 0.7407 | 0 | 0 | 0 | 1 Ref      |
| MC967617 | Unassigned | Unassigned | Unassigned | 1006_0 | Clustered           | 8 VC_1006_0  | 8   | 0.7407 | 1          | 0.7407 | 0 | 0 | 0 | 1 Ref      |
| MC967618 | Unassigned | Unassigned | Unassigned | 1006_0 | Clustered           | 8 VC_1006_0  | 8   | 0.7407 | 1          | 0.7407 | 0 | 0 | 0 | 1 Ref      |
| MC969404 | Unassigned | Unassigned | Unassigned | 329_14 | Clustered/Singleton | 1 VC_329_14  | 1   | 0      | 1          | 0      | 0 | 0 | 0 | 1 Ref      |
| MC969405 | Unassigned | Unassigned | Unassigned | 329_1  | Clustered           | 17 VC_329_1  | 17  | 0.0867 | 1          | 0.0867 | 0 | 0 | 0 | 0.8235 Ref |
| MC969406 | Unassigned | Unassigned | Unassigned | 329_1  | Clustered           | 17 VC_329_1  | 17  | 0.0867 | 1          | 0.0867 | 0 | 0 | 0 | 0.8235 Ref |
| MC969408 | Unassigned | Unassigned | Unassigned | 637_0  | Clustered           | 115 VC_637_0 | 115 | 0.731  | 1          | 0.731  | 0 | 0 | 0 | 0.8764 Ref |
| MC969409 | Unassigned | Unassigned | Unassigned | 637_0  | Clustered           | 115 VC_637_0 | 115 | 0.731  | 1          | 0.731  | 0 | 0 | 0 | 0.8764 Ref |
| MC969410 | Unassigned | Unassigned | Unassigned | 637_0  | Clustered           | 115 VC_637_0 | 115 | 0.731  | 1          | 0.731  | 0 | 0 | 0 | 0.8764 Ref |
| MC969411 | Unassigned | Unassigned | Unassigned | 582_6  | Clustered/Singleton | 1 VC_582_6   | 1   | 0      | 1          | 0      | 0 | 0 | 0 | 1 Ref      |
| MC969412 | Unassigned | Unassigned | Unassigned | 190_40 | Clustered           | 2 VC_190_40  | 2   | 0.0083 | 0.95556395 | 0.0079 | 0 | 0 | 0 | 1 Ref      |
| MC969415 | Unassigned | Unassigned | Unassigned | 28_1   | Clustered           | 53 VC_28_1   | 53  | 0.7164 | 1          | 0.7164 | 0 | 0 | 0 | 0.9325 Ref |
| MC972768 | Unassigned | Unassigned | Unassigned | 111_0  | Clustered           | 91 VC_111_0  | 91  | 0.9587 | 1          | 0.9587 | 0 | 0 | 0 | 1 Ref      |
| MC976803 | Unassigned | Unassigned | Unassigned | 813_1  | Clustered           | 24 VC_813_1  | 24  | 0.535  | 1          | 0.535  | 0 | 0 | 0 | 1 Ref      |
| MC983742 | Unassigned | Unassigned | Unassigned | 100_0  | Clustered           | 15 VC_100_0  | 15  | 0.6536 | 1          | 0.6536 | 0 | 0 | 0 | 1 Ref      |
| MC983743 | Unassigned | Unassigned | Unassigned | 779_3  | Clustered           | 7 VC_779_3   | 7   | 0.0766 | 1          | 0.0766 | 0 | 0 | 0 | 0.7143 Ref |
| MC983840 | Unassigned | Unassigned | Unassigned | 813_1  | Clustered           | 24 VC_813_1  | 24  | 0.535  | 1          | 0.535  | 0 | 0 | 0 | 1 Ref      |
| MH000602 | Unassigned | Unassigned | Unassigned | 252_0  | Clustered           | 121 VC_252_0 | 121 | 0.7376 | 1          | 0.7376 | 0 | 0 | 0 | 0.9999 Ref |
| MH000603 | Unassigned | Unassigned | Unassigned | 252_0  | Clustered           | 121 VC_252_0 | 121 | 0.7376 | 1          | 0.7376 | 0 | 0 | 0 | 0.9999 Ref |
| MH000604 | Unassigned | Unassigned | Unassigned | 252_0  | Clustered           | 121 VC_252_0 | 121 | 0.7376 | 1          | 0.7376 | 0 | 0 | 0 | 0.9999 Ref |
| MH000606 | Unassigned | Unassigned | Unassigned | 325_38 | Clustered           | 6 VC_325_38  | 6   | 0.0267 | 1          | 0.0267 | 0 | 0 | 0 | 0.8 Ref    |
| MH000607 | Unassigned | Unassigned | Unassigned | 551_7  | Clustered           | 28 VC_551_7  | 28  | 0.1661 | 1          | 0.1661 | 0 | 0 | 0 | 0.8519 Ref |
| MH001446 | Unassigned | Unassigned | Unassigned | 507_0  | Clustered           | 8 VC_507_0   | 8   | 0.4466 | 1          | 0.4466 | 0 | 0 | 0 | 1 Ref      |
| MH001447 | Unassigned | Unassigned | Unassigned | 568_0  | Clustered           | 8 VC_568_0   | 8   | 0.5738 | 1          | 0.5738 | 0 | 0 | 0 | 1 Ref      |
| MH001448 | Unassigned | Unassigned | Unassigned | 520_59 | Clustered           | 5 VC_520_59  | 5   | 0.0459 | 0.99999997 | 0.0459 | 0 | 0 | 0 | 1 Ref      |
| MH001450 | Unassigned | Unassigned | Unassigned | 507_0  | Clustered           | 8 VC_507_0   | 8   | 0.4466 | 1          | 0.4466 | 0 | 0 | 0 | 1 Ref      |
| MH001451 | Unassigned | Unassigned | Unassigned | 1046_0 | Clustered           | 7 VC_1046_0  | 7   | 0.9413 | 1          | 0.9413 | 0 | 0 | 0 | 1 Ref      |
| MH001452 | Unassigned | Unassigned | Unassigned | 508_0  | Clustered           | 32 VC_508_0  | 32  | 0.906  | 1          | 0.906  | 0 | 0 | 0 | 1 Ref      |
| MH001453 | Unassigned | Unassigned | Unassigned | 236_0  | Clustered           | 72 VC_236_0  | 72  | 0.8104 | 1          | 0.8104 | 0 | 0 | 0 | 1 Ref      |
| MH001454 | Unassigned | Unassigned | Unassigned | 224_0  | Clustered           | 19 VC_224_0  | 19  | 0.9416 | 1          | 0.9416 | 0 | 0 | 0 | 1 Ref      |
| MH001455 | Unassigned | Unassigned | Unassigned | 761_0  | Clustered           | 67 VC_761_0  | 67  | 0.8947 | 1          | 0.8947 | 0 | 0 | 0 | 1 Ref      |
| MH001456 | Unassigned | Unassigned | Unassigned | 761_0  | Clustered           | 67 VC_761_0  | 67  | 0.8947 | 1          | 0.8947 | 0 | 0 | 0 | 1 Ref      |
| MH001457 | Unassigned | Unassigned | Unassigned | 375_0  | Clustered           | 3 VC_375_0   | 3   | 0.2479 | 0.99807286 | 0.2474 | 0 | 0 | 0 | 1 Ref      |
| MH001458 | Unassigned | Unassigned | Unassigned | 325_11 | Clustered/Singleton | 1 VC_325_11  | 1   | 0      | 1          | 0      | 0 | 0 | 0 | 1 Ref      |
| MH001459 | Unassigned | Unassigned | Unassigned | 515_0  | Clustered           | 16 VC_515_0  | 16  | 0.3793 | 1          | 0.3793 | 0 | 0 | 0 | 1 Ref      |
| MH001460 | Unassigned | Unassigned | Unassigned | 981_1  | Clustered           | 26 VC_981_1  | 26  | 0.7009 | 1          | 0.7009 | 0 | 0 | 0 | 1 Ref      |
| MH015249 | Unassigned | Unassigned | Unassigned | 593_0  | Clustered           | 5 VC_593_0   | 5   | 0.4608 | 0.99999995 | 0.4608 | 0 | 0 | 0 | 1 Ref      |
| MH015250 | Unassigned | Unassigned | Unassigned | 833_0  | Clustered           | 16 VC_833_0  | 16  | 0.9351 | 1          | 0.9351 | 0 | 0 | 0 | 1 Ref      |
| MH015251 | Unassigned | Unassigned | Unassigned | 1212_0 | Clustered           | 2 VC_1212_0  | 2   | 1      | 1          | 1      | 0 | 0 | 0 | 1 Ref      |
| MH015252 | Unassigned | Unassigned | Unassigned | 593_0  | Clustered           | 5 VC_593_0   | 5   | 0.4608 | 0.99999995 | 0.4608 | 0 | 0 | 0 | 1 Ref      |
| MH015253 | Unassigned | Unassigned | Unassigned | 833_0  | Clustered           | 16 VC_833_0  | 16  | 0.9351 | 1          | 0.9351 | 0 | 0 | 0 | 1 Ref      |
| MH015254 | Unassigned | Unassigned | Unassigned | 593_0  | Clustered           | 5 VC_593_0   | 5   | 0.4608 | 0.99999995 | 0.4608 | 0 | 0 | 0 | 1 Ref      |
| MH015255 | Unassigned | Unassigned | Unassigned | 977_0  | Clustered           | 2 VC_977_0   | 2   | 0.0806 | 0.93920319 | 0.0757 | 0 | 0 | 0 | 1 Ref      |
| MH015256 | Unassigned | Unassigned | Unassigned | 833_0  | Clustered           | 16 VC_833_0  | 16  | 0.9351 | 1          | 0.9351 | 0 | 0 | 0 | 1 Ref      |
| MH015257 | Unassigned | Unassigned | Unassigned | 833_0  | Clustered           | 16 VC_833_0  | 16  | 0.9351 | 1          | 0.9351 | 0 | 0 | 0 | 1 Ref      |
| MH015258 | Unassigned | Unassigned | Unassigned | 593_0  | Clustered           | 5 VC_593_0   | 5   | 0.4608 | 0.99999995 | 0.4608 | 0 | 0 | 0 | 1 Ref      |
| MH015259 | Unassigned | Unassigned | Unassigned | 833_0  | Clustered           | 16 VC_833_0  | 16  | 0.9351 | 1          | 0.9351 | 0 | 0 | 0 | 1 Ref      |
| MH019215 | Unassigned | Unassigned | Unassigned | 859_0  | Clustered           | 9 VC_859_0   | 9   | 0.9426 | 1          | 0.9426 | 0 | 0 | 0 | 1 Ref      |
| MH019216 | Unassigned | Unassigned | Unassigned | 859_0  | Clustered           | 9 VC_859_0   | 9   | 0.9426 | 1          | 0.9426 | 0 | 0 | 0 | 1 Ref      |
| MH020235 | Unassigned | Unassigned | Unassigned | 520_31 | Clustered           | 11 VC_520_31 | 11  | 0.0897 | 1          | 0.0897 | 0 | 0 | 0 | 0.6 Ref    |
| MH020236 | Unassigned | Unassigned | Unassigned | 325_53 | Clustered           | 7 VC_325_53  | 7   | 0.0242 | 1          | 0.0242 | 0 | 0 | 0 | 0.9048 Ref |
| MH020237 | Unassigned | Unassigned | Unassigned | 215_2  | Clustered           | 5 VC_215_2   | 5   | 0.0572 | 0.99999997 | 0.0572 | 0 | 0 | 0 | 1 Ref      |
| MH020238 | Unassigned | Unassigned | Unassigned | 514_0  | Clustered           | 75 VC_514_0  | 75  | 0.9402 | 1          | 0.9402 | 0 | 0 | 0 | 1 Ref      |
| MH020239 | Unassigned | Unassigned | Unassigned | 940_0  | Clustered           | 34 VC_940_0  | 34  | 0.7959 | 1          | 0.7959 | 0 | 0 | 0 | 1 Ref      |
| MH020240 | Unassigned | Unassigned | Unassigned | 223_0  | Clustered           | 38 VC_223_0  | 38  | 0.9095 | 1          | 0.9095 | 0 | 0 | 0 | 1 Ref      |
| MH020241 | Unassigned | Unassigned | Unassigned | 1176_0 | Clustered           | 41 VC_1176_0 | 41  | 0.9558 | 1          | 0.9558 | 0 | 0 | 0 | 0.9976 Ref |
| MH020244 | Unassigned | Unassigned | Unassigned | 325_23 | Clustered           | 17 VC_325_23 | 17  | 0.0716 | 1          | 0.0716 | 0 | 0 | 0 | 0.6397 Ref |
| MH020246 | Unassigned | Unassigned | Unassigned | 556_0  | Clustered           | 21 VC_556_0  | 21  | 0.9912 | 1          | 0.9912 | 0 | 0 | 0 | 1 Ref      |
| MH020247 | Unassigned | Unassigned | Unassigned | 551_8  | Clustered           | 19 VC_551_8  | 19  | 0.1039 | 1          | 0.1039 | 0 | 0 | 0 | 0.8713 Ref |
| MH020248 | Unassigned | Unassigned | Unassigned | 513_0  | Clustered           | 32 VC_513_0  | 32  | 0.6881 | 1          | 0.6881 | 0 | 0 | 0 | 1 Ref      |
| MH020249 | Unassigned | Unassigned | Unassigned | 517_1  | Clustered           | 108 VC_517_1 | 108 | 0.8483 | 1          | 0.8483 | 0 | 0 | 0 | 0.9955 Ref |
| MH023293 | Unassigned | Unassigned | Unassigned | 461_0  | Clustered           | 96 VC_461_0  | 96  | 0.9307 | 1          | 0.9307 | 0 | 0 | 0 | 0.9575 Ref |
| MH025888 | Unassigned | Unassigned | Unassigned | 565_0  | Clustered           | 20 VC_565_0  | 20  | 0.8398 | 1          | 0.8398 | 0 | 0 | 0 | 1 Ref      |
| MH025889 | Unassigned | Unassigned | Unassigned | 866_1  | Clustered           | 20 VC_866_1  | 20  | 0.4814 | 1          | 0.4814 | 0 | 0 | 0 | 1 Ref      |
| MH025890 | Unassigned | Unassigned | Unassigned | 570_0  | Clustered           | 9 VC_570_0   | 9   | 0.499  | 1          | 0.499  | 0 | 0 | 0 | 1 Ref      |
| MH031343 | Unassigned | Unassigned | Unassigned | 386_0  | Clustered           | 49 VC_386_0  | 49  | 0.7941 | 1          | 0.7941 | 0 | 0 | 0 | 1 Ref      |
| MH042230 | Unassigned | Unassigned | Unassigned | 699_0  | Clustered           | 71 VC_699_0  | 71  | 0.9352 | 1          | 0.9352 | 0 | 0 | 0 | 1 Ref      |
| MH045554 | Unassigned | Unassigned | Unassigned | 1240_0 | Clustered           | 82 VC_1240_0 | 82  | 0.7945 | 1          | 0.7945 | 0 | 0 | 0 | 1 Ref      |
| MH045557 | Unassigned | Unassigned | Unassigned | 1344_0 | Clustered           | 78 VC_1344_0 | 78  | 0.9732 | 1          | 0.9732 | 0 | 0 | 0 | 1 Ref      |
| MH045558 | Unassigned | Unassigned | Unassigned | 1240_0 | Clustered           | 82 VC_1240_0 | 82  | 0.7945 | 1          | 0.7945 | 0 | 0 | 0 | 1 Ref      |
| MH045560 | Unassigned | Unassigned | Unassigned | 1240_0 | Clustered           | 82 VC_1240_0 | 82  | 0.7945 | 1          | 0.7945 | 0 | 0 | 0 | 1 Ref      |
| MH045561 | Unassigned | Unassigned | Unassigned | 1344_0 | Clustered           | 78 VC_1344_0 | 78  | 0.9732 | 1          | 0.9732 | 0 | 0 | 0 | 1 Ref      |
| MH045562 | Unassigned | Unassigned | Unassigned | 1240_0 | Clustered           | 82 VC_1240_0 | 82  | 0.7945 | 1          | 0.7945 | 0 | 0 | 0 | 1 Ref      |
| MH045563 | Unassigned | Unassigned | Unassigned | 1240_0 | Clustered           | 82 VC_1240_0 | 82  | 0.7945 | 1          | 0.7945 | 0 | 0 | 0 | 1 Ref      |
| MH045564 | Unassigned | Unassigned | Unassigned | 1240_0 | Clustered           | 82 VC_1240_0 | 82  | 0.7945 | 1          | 0.7945 | 0 | 0 | 0 | 1 Ref      |
| MH045565 | Unassigned | Unassigned | Unassigned | 1240_0 | Clustered           | 82 VC_1240_0 | 82  | 0.7945 | 1          | 0.7945 | 0 | 0 | 0 | 1 Ref      |
| MH045566 | Unassigned | Unassigned | Unassigned | 1234_0 | Clustered           | 44 VC_1234_0 | 44  | 1      | 1          | 1      | 0 | 0 | 0 | 1 Ref      |
| MH045567 | Unassigned | Unassigned | Unassigned | 1234_0 | Clustered           | 44 VC_1234_0 | 44  | 1      | 1          | 1      | 0 | 0 | 0 | 1 Ref      |
| MH045568 | Unassigned | Unassigned | Unassigned | 1234_0 | Clustered           | 44 VC_1234_0 | 44  | 1      | 1          | 1      | 0 | 0 | 0 | 1 Ref      |
| MH045569 | Unassigned | Unassigned | Unassigned | 761_0  | Clustered           | 67 VC_761_0  | 67  | 0.8947 | 1          | 0.8947 | 0 | 0 | 0 | 1 Ref      |



|          |            |            |            |         |                     |              |     |        |            |        |   |   |   |            |
|----------|------------|------------|------------|---------|---------------------|--------------|-----|--------|------------|--------|---|---|---|------------|
| MH047632 | Unassigned | Unassigned | Unassigned | 513_0   | Clustered           | 32 VC_513_0  | 32  | 0.6881 | 1          | 0.6881 | 0 | 0 | 0 | 1 Ref      |
| MH047633 | Unassigned | Unassigned | Unassigned | 513_0   | Clustered           | 32 VC_513_0  | 32  | 0.6881 | 1          | 0.6881 | 0 | 0 | 0 | 1 Ref      |
| MH051246 | Unassigned | Unassigned | Unassigned | 236_0   | Clustered           | 72 VC_236_0  | 72  | 0.8104 | 1          | 0.8104 | 0 | 0 | 0 | 1 Ref      |
| MH051247 | Unassigned | Unassigned | Unassigned | 517_1   | Clustered           | 108 VC_517_1 | 108 | 0.8483 | 1          | 0.8483 | 0 | 0 | 0 | 0.9955 Ref |
| MH051249 | Unassigned | Unassigned | Unassigned | 508_0   | Clustered           | 32 VC_508_0  | 32  | 0.906  | 1          | 0.906  | 0 | 0 | 0 | 1 Ref      |
| MH051250 | Unassigned | Unassigned | Unassigned | 940_0   | Clustered           | 34 VC_940_0  | 34  | 0.7959 | 1          | 0.7959 | 0 | 0 | 0 | 1 Ref      |
| MH051251 | Unassigned | Unassigned | Unassigned | 371_13  | Clustered           | 33 VC_371_13 | 33  | 0.179  | 1          | 0.179  | 0 | 0 | 0 | 0.8769 Ref |
| MH051252 | Unassigned | Unassigned | Unassigned | 216_6   | Clustered           | 42 VC_216_6  | 42  | 0.473  | 1          | 0.473  | 0 | 0 | 0 | 0.8351 Ref |
| MH051253 | Unassigned | Unassigned | Unassigned | 223_0   | Clustered           | 38 VC_223_0  | 38  | 0.9095 | 1          | 0.9095 | 0 | 0 | 0 | 1 Ref      |
| MH051254 | Unassigned | Unassigned | Unassigned | 940_0   | Clustered           | 34 VC_940_0  | 34  | 0.7959 | 1          | 0.7959 | 0 | 0 | 0 | 1 Ref      |
| MH051255 | Unassigned | Unassigned | Unassigned | 238_0   | Clustered           | 17 VC_238_0  | 17  | 0.6109 | 1          | 0.6109 | 0 | 0 | 0 | 1 Ref      |
| MH051256 | Unassigned | Unassigned | Unassigned | 940_0   | Clustered           | 34 VC_940_0  | 34  | 0.7959 | 1          | 0.7959 | 0 | 0 | 0 | 1 Ref      |
| MH051257 | Unassigned | Unassigned | Unassigned | 520_51  | Clustered/Singleton | 1 VC_520_51  | 1   | 0      | 1          | 0      | 0 | 0 | 0 | 1 Ref      |
| MH051258 | Unassigned | Unassigned | Unassigned | 234_0   | Clustered           | 21 VC_234_0  | 21  | 0.8355 | 1          | 0.8355 | 0 | 0 | 0 | 1 Ref      |
| MH051259 | Unassigned | Unassigned | Unassigned | 513_0   | Clustered           | 32 VC_513_0  | 32  | 0.6881 | 1          | 0.6881 | 0 | 0 | 0 | 1 Ref      |
| MH051260 | Unassigned | Unassigned | Unassigned | 558_61  | Clustered           | 2 VC_558_61  | 2   | 0.0032 | 0.66165479 | 0.0021 | 0 | 0 | 0 | 1 Ref      |
| MH051261 | Unassigned | Unassigned | Unassigned | 558_7   | Clustered/Singleton | 1 VC_558_7   | 1   | 0      | 1          | 0      | 0 | 0 | 0 | 1 Ref      |
| MH051264 | Unassigned | Unassigned | Unassigned | 371_5   | Clustered           | 2 VC_371_5   | 2   | 0.0035 | 0.95771071 | 0.0033 | 0 | 0 | 0 | 1 Ref      |
| MH051265 | Unassigned | Unassigned | Unassigned | 509_0   | Clustered           | 37 VC_509_0  | 37  | 0.9689 | 1          | 0.9689 | 0 | 0 | 0 | 1 Ref      |
| MH051266 | Unassigned | Unassigned | Unassigned | 558_50  | Clustered           | 15 VC_558_50 | 15  | 0.0468 | 1          | 0.0468 | 0 | 0 | 0 | 0.9238 Ref |
| MH051333 | Unassigned | Unassigned | Unassigned | 847_1   | Clustered           | 26 VC_847_1  | 26  | 0.6323 | 1          | 0.6323 | 0 | 0 | 0 | 0.9815 Ref |
| MH051334 | Unassigned | Unassigned | Unassigned | 638_0   | Clustered           | 45 VC_638_0  | 45  | 0.7741 | 1          | 0.7741 | 0 | 0 | 0 | 1 Ref      |
| MH051335 | Unassigned | Unassigned | Unassigned | 618_0   | Clustered           | 13 VC_618_0  | 13  | 0.6252 | 1          | 0.6252 | 0 | 0 | 0 | 1 Ref      |
| MH051911 | Unassigned | Unassigned | Unassigned | 575_0   | Clustered           | 35 VC_575_0  | 35  | 0.8815 | 1          | 0.8815 | 0 | 0 | 0 | 1 Ref      |
| MH051912 | Unassigned | Unassigned | Unassigned | 575_0   | Clustered           | 35 VC_575_0  | 35  | 0.8815 | 1          | 0.8815 | 0 | 0 | 0 | 1 Ref      |
| MH051913 | Unassigned | Unassigned | Unassigned | 290_6   | Clustered           | 12 VC_290_6  | 12  | 0.1149 | 1          | 0.1149 | 0 | 0 | 0 | 0.8182 Ref |
| MH051914 | Unassigned | Unassigned | Unassigned | 329_21  | Clustered/Singleton | 1 VC_329_21  | 1   | 0      | 1          | 0      | 0 | 0 | 0 | 1 Ref      |
| MH051915 | Unassigned | Unassigned | Unassigned | 283_151 | Clustered/Singleton | 1 VC_283_151 | 1   | 0      | 1          | 0      | 0 | 0 | 0 | 1 Ref      |
| MH051916 | Unassigned | Unassigned | Unassigned | 283_170 | Clustered/Singleton | 1 VC_283_170 | 1   | 0      | 1          | 0      | 0 | 0 | 0 | 1 Ref      |
| MH051917 | Unassigned | Unassigned | Unassigned | 290_5   | Clustered           | 14 VC_290_5  | 14  | 0.1422 | 1          | 0.1422 | 0 | 0 | 0 | 0.9231 Ref |
| MH051918 | Unassigned | Unassigned | Unassigned | 576_0   | Clustered           | 4 VC_576_0   | 4   | 0.0606 | 0.99998766 | 0.0606 | 0 | 0 | 0 | 1 Ref      |
| MH059632 | Unassigned | Unassigned | Unassigned | 458_0   | Clustered           | 5 VC_458_0   | 5   | 0.1938 | 0.99999997 | 0.1938 | 0 | 0 | 0 | 1 Ref      |
| MH059635 | Unassigned | Unassigned | Unassigned | 117_0   | Clustered           | 9 VC_117_0   | 9   | 0.9977 | 0.98988637 | 0.9876 | 0 | 0 | 0 | 1 Ref      |
| MH059636 | Unassigned | Unassigned | Unassigned | 490_5   | Clustered/Singleton | 1 VC_490_5   | 1   | 0      | 1          | 0      | 0 | 0 | 0 | 1 Ref      |
| MH059638 | Unassigned | Unassigned | Unassigned | 841_0   | Clustered           | 10 VC_841_0  | 10  | 0.5997 | 1          | 0.5997 | 0 | 0 | 0 | 1 Ref      |
| MH059639 | Unassigned | Unassigned | Unassigned | 393_0   | Clustered           | 7 VC_393_0   | 7   | 0.1775 | 1          | 0.1775 | 0 | 0 | 0 | 1 Ref      |
| MH077576 | Unassigned | Unassigned | Unassigned | 216_6   | Clustered           | 42 VC_216_6  | 42  | 0.473  | 1          | 0.473  | 0 | 0 | 0 | 0.8351 Ref |
| MH077577 | Unassigned | Unassigned | Unassigned | 236_0   | Clustered           | 72 VC_236_0  | 72  | 0.8104 | 1          | 0.8104 | 0 | 0 | 0 | 1 Ref      |
| MH077578 | Unassigned | Unassigned | Unassigned | 520_34  | Clustered/Singleton | 1 VC_520_34  | 1   | 0      | 1          | 0      | 0 | 0 | 0 | 1 Ref      |
| MH077579 | Unassigned | Unassigned | Unassigned | 566_4   | Clustered           | 16 VC_566_4  | 16  | 0.2517 | 0.9999998  | 0.2517 | 0 | 0 | 0 | 0.9417 Ref |
| MH077580 | Unassigned | Unassigned | Unassigned | 520_31  | Clustered           | 11 VC_520_31 | 11  | 0.0897 | 1          | 0.0897 | 0 | 0 | 0 | 0.6 Ref    |
| MH077581 | Unassigned | Unassigned | Unassigned | 517_1   | Clustered           | 108 VC_517_1 | 108 | 0.8483 | 1          | 0.8483 | 0 | 0 | 0 | 0.9955 Ref |
| MH077582 | Unassigned | Unassigned | Unassigned | 371_2   | Clustered           | 8 VC_371_2   | 8   | 0.0232 | 1          | 0.0232 | 0 | 0 | 0 | 0.8571 Ref |
| MH077583 | Unassigned | Unassigned | Unassigned | 514_0   | Clustered           | 75 VC_514_0  | 75  | 0.9402 | 1          | 0.9402 | 0 | 0 | 0 | 1 Ref      |
| MH077584 | Unassigned | Unassigned | Unassigned | 761_0   | Clustered           | 67 VC_761_0  | 67  | 0.8947 | 1          | 0.8947 | 0 | 0 | 0 | 1 Ref      |
| MH102284 | Unassigned | Unassigned | Unassigned | 584_0   | Clustered           | 28 VC_584_0  | 28  | 0.7704 | 1          | 0.7704 | 0 | 0 | 0 | 1 Ref      |
| MH102285 | Unassigned | Unassigned | Unassigned | 190_23  | Clustered           | 10 VC_190_23 | 10  | 0.0704 | 1          | 0.0704 | 0 | 0 | 0 | 0.8444 Ref |
| MH105773 | Unassigned | Unassigned | Unassigned | 607_0   | Clustered           | 16 VC_607_0  | 16  | 0.9179 | 1          | 0.9179 | 0 | 0 | 0 | 1 Ref      |
| MH107028 | Unassigned | Unassigned | Unassigned | 844_0   | Clustered           | 27 VC_844_0  | 27  | 0.9385 | 1          | 0.9385 | 0 | 0 | 0 | 1 Ref      |
| MH107118 | Unassigned | Unassigned | Unassigned | 96_0    | Clustered           | 30 VC_96_0   | 30  | 0.718  | 1          | 0.718  | 0 | 0 | 0 | 1 Ref      |
| MH107769 | Unassigned | Unassigned | Unassigned | 149_12  | Clustered           | 2 VC_149_12  | 2   | 0.0044 | 0.83156708 | 0.0037 | 0 | 0 | 0 | 1 Ref      |
| MH107770 | Unassigned | Unassigned | Unassigned | 423_0   | Clustered           | 45 VC_423_0  | 45  | 0.9484 | 1          | 0.9484 | 0 | 0 | 0 | 1 Ref      |
| MH113812 | Unassigned | Unassigned | Unassigned | 1027_0  | Clustered           | 20 VC_1027_0 | 20  | 0.7114 | 1          | 0.7114 | 0 | 0 | 0 | 1 Ref      |
| MH113813 | Unassigned | Unassigned | Unassigned | 1027_0  | Clustered           | 20 VC_1027_0 | 20  | 0.7114 | 1          | 0.7114 | 0 | 0 | 0 | 1 Ref      |
| MH113814 | Unassigned | Unassigned | Unassigned | 1027_0  | Clustered           | 20 VC_1027_0 | 20  | 0.7114 | 1          | 0.7114 | 0 | 0 | 0 | 1 Ref      |
| MH113815 | Unassigned | Unassigned | Unassigned | 1027_0  | Clustered           | 20 VC_1027_0 | 20  | 0.7114 | 1          | 0.7114 | 0 | 0 | 0 | 1 Ref      |
| MH115576 | Unassigned | Unassigned | Unassigned | 696_1   | Clustered           | 8 VC_696_1   | 8   | 0.5452 | 1          | 0.5452 | 0 | 0 | 0 | 0.9286 Ref |
| MH128984 | Unassigned | Unassigned | Unassigned | 279_0   | Clustered           | 2 VC_279_0   | 2   | 0.1888 | 0.95124665 | 0.1796 | 0 | 0 | 0 | 1 Ref      |
| MH133207 | Unassigned | Unassigned | Unassigned | 701_1   | Clustered           | 2 VC_701_1   | 2   | 0.1304 | 0.95114164 | 0.124  | 0 | 0 | 0 | 1 Ref      |
| MH136584 | Unassigned | Unassigned | Unassigned | 149_8   | Clustered           | 66 VC_149_8  | 66  | 0.4565 | 1          | 0.4565 | 0 | 0 | 0 | 0.8182 Ref |
| MH142219 | Unassigned | Unassigned | Unassigned | 24_0    | Clustered           | 3 VC_24_0    | 3   | 0.3455 | 0.99844825 | 0.345  | 0 | 0 | 0 | 1 Ref      |
| MH142220 | Unassigned | Unassigned | Unassigned | 24_0    | Clustered           | 3 VC_24_0    | 3   | 0.3455 | 0.99844825 | 0.345  | 0 | 0 | 0 | 1 Ref      |
| MH153799 | Unassigned | Unassigned | Unassigned | 1348_0  | Clustered           | 5 VC_1348_0  | 5   | 0.5462 | 0.99999985 | 0.5462 | 0 | 0 | 0 | 1 Ref      |
| MH153800 | Unassigned | Unassigned | Unassigned | 803_0   | Clustered           | 3 VC_803_0   | 3   | 0.0513 | 0.99857736 | 0.0512 | 0 | 0 | 0 | 0.6667 Ref |
| MH153801 | Unassigned | Unassigned | Unassigned | 803_0   | Clustered           | 3 VC_803_0   | 3   | 0.0513 | 0.99857736 | 0.0512 | 0 | 0 | 0 | 0.6667 Ref |
| MH153802 | Unassigned | Unassigned | Unassigned | 1240_0  | Clustered           | 82 VC_1240_0 | 82  | 0.7945 | 1          | 0.7945 | 0 | 0 | 0 | 1 Ref      |
| MH153803 | Unassigned | Unassigned | Unassigned | 1171_0  | Clustered           | 21 VC_1171_0 | 21  | 0.7125 | 1          | 0.7125 | 0 | 0 | 0 | 1 Ref      |
| MH153804 | Unassigned | Unassigned | Unassigned | 726_0   | Clustered           | 3 VC_726_0   | 3   | 0.0381 | 0.88955608 | 0.0339 | 0 | 0 | 0 | 1 Ref      |
| MH153805 | Unassigned | Unassigned | Unassigned | 1240_0  | Clustered           | 82 VC_1240_0 | 82  | 0.7945 | 1          | 0.7945 | 0 | 0 | 0 | 1 Ref      |
| MH153806 | Unassigned | Unassigned | Unassigned | 1240_0  | Clustered           | 82 VC_1240_0 | 82  | 0.7945 | 1          | 0.7945 | 0 | 0 | 0 | 1 Ref      |
| MH153807 | Unassigned | Unassigned | Unassigned | 1070_0  | Clustered           | 2 VC_1070_0  | 2   | 0.1299 | 0.95375267 | 0.1239 | 0 | 0 | 0 | 1 Ref      |
| MH153808 | Unassigned | Unassigned | Unassigned | 1176_0  | Clustered           | 41 VC_1176_0 | 41  | 0.9558 | 1          | 0.9558 | 0 | 0 | 0 | 0.9976 Ref |
| MH153809 | Unassigned | Unassigned | Unassigned | 1093_0  | Clustered           | 40 VC_1093_0 | 40  | 0.8754 | 1          | 0.8754 | 0 | 0 | 0 | 1 Ref      |
| MH153810 | Unassigned | Unassigned | Unassigned | 510_0   | Clustered           | 12 VC_510_0  | 12  | 0.3963 | 1          | 0.3963 | 0 | 0 | 0 | 0.9697 Ref |
| MH153811 | Unassigned | Unassigned | Unassigned | 1240_0  | Clustered           | 82 VC_1240_0 | 82  | 0.7945 | 1          | 0.7945 | 0 | 0 | 0 | 1 Ref      |
| MH153812 | Unassigned | Unassigned | Unassigned | 1070_0  | Clustered           | 2 VC_1070_0  | 2   | 0.1299 | 0.95375267 | 0.1239 | 0 | 0 | 0 | 1 Ref      |
| MH153813 | Unassigned | Unassigned | Unassigned | 1171_0  | Clustered           | 21 VC_1171_0 | 21  | 0.7125 | 1          | 0.7125 | 0 | 0 | 0 | 1 Ref      |
| MH155864 | Unassigned | Unassigned | Unassigned | 514_0   | Clustered           | 75 VC_514_0  | 75  | 0.9402 | 1          | 0.9402 | 0 | 0 | 0 | 1 Ref      |
| MH155865 | Unassigned | Unassigned | Unassigned | 520_38  | Clustered           | 6 VC_520_38  | 6   | 0.0519 | 1          | 0.0519 | 0 | 0 | 0 | 0.8667 Ref |
| MH155866 | Unassigned | Unassigned | Unassigned | 520_4   | Clustered/Singleton | 1 VC_520_4   | 1   | 0      | 1          | 0      | 0 | 0 | 0 | 1 Ref      |
| MH155868 | Unassigned | Unassigned | Unassigned | 1224_0  | Clustered           | 19 VC_1224_0 | 19  | 1      | 1          | 1      | 0 | 0 | 0 | 1 Ref      |



|          |            |            |            |         |                     |              |     |        |            |        |   |   |   |            |
|----------|------------|------------|------------|---------|---------------------|--------------|-----|--------|------------|--------|---|---|---|------------|
| MH155870 | Unassigned | Unassigned | Unassigned | 1351_0  | Clustered           | 2 VC_1351_0  | 2   | 1      | 1          | 1      | 0 | 0 | 0 | 1 Ref      |
| MH155871 | Unassigned | Unassigned | Unassigned | 520_38  | Clustered           | 6 VC_520_38  | 6   | 0.0519 | 1          | 0.0519 | 0 | 0 | 0 | 0.8667 Ref |
| MH155873 | Unassigned | Unassigned | Unassigned | 1352_0  | Clustered           | 31 VC_1352_0 | 31  | 0.849  | 1          | 0.849  | 0 | 0 | 0 | 1 Ref      |
| MH155874 | Unassigned | Unassigned | Unassigned | 371_13  | Clustered           | 33 VC_371_13 | 33  | 0.179  | 1          | 0.179  | 0 | 0 | 0 | 0.8769 Ref |
| MH155875 | Unassigned | Unassigned | Unassigned | 517_1   | Clustered           | 108 VC_517_1 | 108 | 0.8483 | 1          | 0.8483 | 0 | 0 | 0 | 0.9955 Ref |
| MH155876 | Unassigned | Unassigned | Unassigned | 223_0   | Clustered           | 38 VC_223_0  | 38  | 0.9095 | 1          | 0.9095 | 0 | 0 | 0 | 1 Ref      |
| MH155877 | Unassigned | Unassigned | Unassigned | 872_0   | Clustered           | 31 VC_872_0  | 31  | 0.8151 | 1          | 0.8151 | 0 | 0 | 0 | 0.8194 Ref |
| MH155879 | Unassigned | Unassigned | Unassigned | 517_1   | Clustered           | 108 VC_517_1 | 108 | 0.8483 | 1          | 0.8483 | 0 | 0 | 0 | 0.9955 Ref |
| MH155880 | Unassigned | Unassigned | Unassigned | 872_0   | Clustered           | 31 VC_872_0  | 31  | 0.8151 | 1          | 0.8151 | 0 | 0 | 0 | 0.8194 Ref |
| MH159197 | Unassigned | Unassigned | Unassigned | 149_15  | Clustered           | 16 VC_149_15 | 16  | 0.0788 | 1          | 0.0788 | 0 | 0 | 0 | 0.8083 Ref |
| MH160392 | Unassigned | Unassigned | Unassigned | 779_2   | Clustered           | 5 VC_779_2   | 5   | 0.0876 | 0.99999997 | 0.0876 | 0 | 0 | 0 | 1 Ref      |
| MH160766 | Unassigned | Unassigned | Unassigned | 847_1   | Clustered           | 26 VC_847_1  | 26  | 0.6323 | 1          | 0.6323 | 0 | 0 | 0 | 0.9815 Ref |
| MH160767 | Unassigned | Unassigned | Unassigned | 247_0   | Clustered           | 14 VC_247_0  | 14  | 0.9119 | 1          | 0.9119 | 0 | 0 | 0 | 0.967 Ref  |
| MH165274 | Unassigned | Unassigned | Unassigned | 492_1   | Clustered           | 20 VC_492_1  | 20  | 0.4176 | 1          | 0.4176 | 0 | 0 | 0 | 1 Ref      |
| MH171093 | Unassigned | Unassigned | Unassigned | 982_0   | Clustered           | 62 VC_982_0  | 62  | 0.8646 | 1          | 0.8646 | 0 | 0 | 0 | 0.743 Ref  |
| MH171094 | Unassigned | Unassigned | Unassigned | 982_0   | Clustered           | 62 VC_982_0  | 62  | 0.8646 | 1          | 0.8646 | 0 | 0 | 0 | 0.743 Ref  |
| MH171095 | Unassigned | Unassigned | Unassigned | 982_0   | Clustered           | 62 VC_982_0  | 62  | 0.8646 | 1          | 0.8646 | 0 | 0 | 0 | 0.743 Ref  |
| MH171096 | Unassigned | Unassigned | Unassigned | 982_0   | Clustered           | 62 VC_982_0  | 62  | 0.8646 | 1          | 0.8646 | 0 | 0 | 0 | 0.743 Ref  |
| MH171097 | Unassigned | Unassigned | Unassigned | 982_0   | Clustered           | 62 VC_982_0  | 62  | 0.8646 | 1          | 0.8646 | 0 | 0 | 0 | 0.743 Ref  |
| MH171098 | Unassigned | Unassigned | Unassigned | 982_0   | Clustered           | 62 VC_982_0  | 62  | 0.8646 | 1          | 0.8646 | 0 | 0 | 0 | 0.743 Ref  |
| MH172261 | Unassigned | Unassigned | Unassigned | 823_0   | Clustered           | 124 VC_823_0 | 124 | 0.9492 | 1          | 0.9492 | 0 | 0 | 0 | 1 Ref      |
| MH172262 | Unassigned | Unassigned | Unassigned | 823_0   | Clustered           | 124 VC_823_0 | 124 | 0.9492 | 1          | 0.9492 | 0 | 0 | 0 | 1 Ref      |
| MH172263 | Unassigned | Unassigned | Unassigned | 823_0   | Clustered           | 124 VC_823_0 | 124 | 0.9492 | 1          | 0.9492 | 0 | 0 | 0 | 1 Ref      |
| MH172264 | Unassigned | Unassigned | Unassigned | 823_0   | Clustered           | 124 VC_823_0 | 124 | 0.9492 | 1          | 0.9492 | 0 | 0 | 0 | 1 Ref      |
| MH178096 | Unassigned | Unassigned | Unassigned | 33_0    | Clustered           | 4 VC_33_0    | 4   | 0.06   | 0.99994826 | 0.06   | 0 | 0 | 0 | 1 Ref      |
| MH178381 | Unassigned | Unassigned | Unassigned | 975_0   | Clustered           | 11 VC_975_0  | 11  | 0.9687 | 1          | 0.9687 | 0 | 0 | 0 | 1 Ref      |
| MH178382 | Unassigned | Unassigned | Unassigned | 975_0   | Clustered           | 11 VC_975_0  | 11  | 0.9687 | 1          | 0.9687 | 0 | 0 | 0 | 1 Ref      |
| MH179470 | Unassigned | Unassigned | Unassigned | 1189_0  | Clustered           | 9 VC_1189_0  | 9   | 0.968  | 1          | 0.968  | 0 | 0 | 0 | 1 Ref      |
| MH179471 | Unassigned | Unassigned | Unassigned | 1189_0  | Clustered           | 9 VC_1189_0  | 9   | 0.968  | 1          | 0.968  | 0 | 0 | 0 | 1 Ref      |
| MH179472 | Unassigned | Unassigned | Unassigned | 130_0   | Clustered           | 19 VC_130_0  | 19  | 0.6068 | 1          | 0.6068 | 0 | 0 | 0 | 1 Ref      |
| MH179473 | Unassigned | Unassigned | Unassigned | 878_0   | Clustered           | 32 VC_878_0  | 32  | 0.9965 | 1          | 0.9965 | 0 | 0 | 0 | 1 Ref      |
| MH179474 | Unassigned | Unassigned | Unassigned | 369_0   | Clustered           | 6 VC_369_0   | 6   | 0.5924 | 1          | 0.5924 | 0 | 0 | 0 | 1 Ref      |
| MH179475 | Unassigned | Unassigned | Unassigned | 130_0   | Clustered           | 19 VC_130_0  | 19  | 0.6068 | 1          | 0.6068 | 0 | 0 | 0 | 1 Ref      |
| MH179476 | Unassigned | Unassigned | Unassigned | 600_2   | Clustered           | 10 VC_600_2  | 10  | 0.3041 | 1          | 0.3041 | 0 | 0 | 0 | 1 Ref      |
| MH179477 | Unassigned | Unassigned | Unassigned | 600_2   | Clustered           | 10 VC_600_2  | 10  | 0.3041 | 1          | 0.3041 | 0 | 0 | 0 | 1 Ref      |
| MH179478 | Unassigned | Unassigned | Unassigned | 130_0   | Clustered           | 19 VC_130_0  | 19  | 0.6068 | 1          | 0.6068 | 0 | 0 | 0 | 1 Ref      |
| MH179479 | Unassigned | Unassigned | Unassigned | 1189_0  | Clustered           | 9 VC_1189_0  | 9   | 0.968  | 1          | 0.968  | 0 | 0 | 0 | 1 Ref      |
| MH179480 | Unassigned | Unassigned | Unassigned | 842_0   | Clustered           | 2 VC_842_0   | 2   | 0.0559 | 0.95564851 | 0.0534 | 0 | 0 | 0 | 1 Ref      |
| MH181876 | Unassigned | Unassigned | Unassigned | 428_0   | Clustered           | 33 VC_428_0  | 33  | 0.9915 | 1          | 0.9915 | 0 | 0 | 0 | 1 Ref      |
| MH183162 | Unassigned | Unassigned | Unassigned | 1345_1  | Clustered           | 2 VC_1345_1  | 2   | 0.0956 | 0.9561938  | 0.0914 | 0 | 0 | 0 | 1 Ref      |
| MH191398 | Unassigned | Unassigned | Unassigned | 792_0   | Clustered           | 35 VC_792_0  | 35  | 0.9828 | 1          | 0.9828 | 0 | 0 | 0 | 1 Ref      |
| MH193369 | Unassigned | Unassigned | Unassigned | 695_0   | Clustered           | 48 VC_695_0  | 48  | 0.8162 | 1          | 0.8162 | 0 | 0 | 0 | 1 Ref      |
| MH203051 | Unassigned | Unassigned | Unassigned | 190_22  | Clustered           | 3 VC_190_22  | 3   | 0.0186 | 0.9985967  | 0.0185 | 0 | 0 | 0 | 1 Ref      |
| MH203383 | Unassigned | Unassigned | Unassigned | 695_0   | Clustered           | 48 VC_695_0  | 48  | 0.8162 | 1          | 0.8162 | 0 | 0 | 0 | 1 Ref      |
| MH203384 | Unassigned | Unassigned | Unassigned | 695_0   | Clustered           | 48 VC_695_0  | 48  | 0.8162 | 1          | 0.8162 | 0 | 0 | 0 | 1 Ref      |
| MH206183 | Unassigned | Unassigned | Unassigned | 178_0   | Clustered           | 5 VC_178_0   | 5   | 0.7741 | 0.99998991 | 0.7741 | 0 | 0 | 0 | 1 Ref      |
| MH206184 | Unassigned | Unassigned | Unassigned | 178_0   | Clustered           | 5 VC_178_0   | 5   | 0.7741 | 0.99998991 | 0.7741 | 0 | 0 | 0 | 1 Ref      |
| MH218848 | Unassigned | Unassigned | Unassigned | 178_0   | Clustered           | 5 VC_178_0   | 5   | 0.7741 | 0.99998991 | 0.7741 | 0 | 0 | 0 | 1 Ref      |
| MH220877 | Unassigned | Unassigned | Unassigned | 274_0   | Clustered           | 2 VC_274_0   | 2   | 0.0799 | 0.953709   | 0.0762 | 0 | 0 | 0 | 1 Ref      |
| MH221128 | Unassigned | Unassigned | Unassigned | 959_6   | Clustered/Singleton | 1 VC_959_6   | 1   | 0      | 1          | 0      | 0 | 0 | 0 | 1 Ref      |
| MH221129 | Unassigned | Unassigned | Unassigned | 959_5   | Clustered           | 19 VC_959_5  | 19  | 0.2626 | 1          | 0.2626 | 0 | 0 | 0 | 1 Ref      |
| MH229862 | Unassigned | Unassigned | Unassigned | 1353_0  | Clustered           | 10 VC_1353_0 | 10  | 1      | 1          | 1      | 0 | 0 | 0 | 1 Ref      |
| MH229863 | Unassigned | Unassigned | Unassigned | 1353_0  | Clustered           | 10 VC_1353_0 | 10  | 1      | 1          | 1      | 0 | 0 | 0 | 1 Ref      |
| MH229864 | Unassigned | Unassigned | Unassigned | 1353_0  | Clustered           | 10 VC_1353_0 | 10  | 1      | 1          | 1      | 0 | 0 | 0 | 1 Ref      |
| MH229865 | Unassigned | Unassigned | Unassigned | 1353_0  | Clustered           | 10 VC_1353_0 | 10  | 1      | 1          | 1      | 0 | 0 | 0 | 1 Ref      |
| MH230177 | Unassigned | Unassigned | Unassigned | 795_0   | Clustered           | 19 VC_795_0  | 19  | 0.6848 | 1          | 0.6848 | 0 | 0 | 0 | 1 Ref      |
| MH230874 | Unassigned | Unassigned | Unassigned | 371_11  | Clustered           | 31 VC_371_11 | 31  | 0.0927 | 1          | 0.0927 | 0 | 0 | 0 | 0.7011 Ref |
| MH230875 | Unassigned | Unassigned | Unassigned | 371_3   | Clustered           | 22 VC_371_3  | 22  | 0.0787 | 1          | 0.0787 | 0 | 0 | 0 | 0.9048 Ref |
| MH230876 | Unassigned | Unassigned | Unassigned | 325_24  | Clustered           | 3 VC_325_24  | 3   | 0.009  | 0.99853949 | 0.009  | 0 | 0 | 0 | 1 Ref      |
| MH230877 | Unassigned | Unassigned | Unassigned | 517_1   | Clustered           | 108 VC_517_1 | 108 | 0.8483 | 1          | 0.8483 | 0 | 0 | 0 | 0.9955 Ref |
| MH230878 | Unassigned | Unassigned | Unassigned | 325_52  | Clustered           | 5 VC_325_52  | 5   | 0.0147 | 0.99999073 | 0.0147 | 0 | 0 | 0 | 0.7 Ref    |
| MH243438 | Unassigned | Unassigned | Unassigned | 286_1   | Clustered           | 21 VC_286_1  | 21  | 0.1696 | 1          | 0.1696 | 0 | 0 | 0 | 0.9048 Ref |
| MH243439 | Unassigned | Unassigned | Unassigned | 283_181 | Clustered/Singleton | 1 VC_283_181 | 1   | 0      | 1          | 0      | 0 | 0 | 0 | 1 Ref      |
| MH248069 | Unassigned | Unassigned | Unassigned | 898_0   | Clustered           | 10 VC_898_0  | 10  | 0.7284 | 1          | 0.7284 | 0 | 0 | 0 | 1 Ref      |
| MH248138 | Unassigned | Unassigned | Unassigned | 67_3    | Clustered           | 20 VC_67_3   | 20  | 0.3542 | 1          | 0.3542 | 0 | 0 | 0 | 1 Ref      |
| MH248947 | Unassigned | Unassigned | Unassigned | 982_0   | Clustered           | 62 VC_982_0  | 62  | 0.8646 | 1          | 0.8646 | 0 | 0 | 0 | 0.743 Ref  |
| MH252123 | Unassigned | Unassigned | Unassigned | 847_1   | Clustered           | 26 VC_847_1  | 26  | 0.6323 | 1          | 0.6323 | 0 | 0 | 0 | 0.9815 Ref |
| MH252365 | Unassigned | Unassigned | Unassigned | 125_0   | Clustered           | 17 VC_125_0  | 17  | 0.9244 | 1          | 0.9244 | 0 | 0 | 0 | 1 Ref      |
| MH268168 | Unassigned | Unassigned | Unassigned | 130_0   | Clustered           | 19 VC_130_0  | 19  | 0.6068 | 1          | 0.6068 | 0 | 0 | 0 | 1 Ref      |
| MH271291 | Unassigned | Unassigned | Unassigned | 956_0   | Clustered           | 39 VC_956_0  | 39  | 1      | 1          | 1      | 0 | 0 | 0 | 1 Ref      |
| MH271292 | Unassigned | Unassigned | Unassigned | 1343_0  | Clustered           | 21 VC_1343_0 | 21  | 0.9843 | 1          | 0.9843 | 0 | 0 | 0 | 1 Ref      |
| MH271293 | Unassigned | Unassigned | Unassigned | 956_0   | Clustered           | 39 VC_956_0  | 39  | 1      | 1          | 1      | 0 | 0 | 0 | 1 Ref      |
| MH271294 | Unassigned | Unassigned | Unassigned | 956_0   | Clustered           | 39 VC_956_0  | 39  | 1      | 1          | 1      | 0 | 0 | 0 | 1 Ref      |
| MH271295 | Unassigned | Unassigned | Unassigned | 1175_0  | Clustered           | 22 VC_1175_0 | 22  | 0.4562 | 1          | 0.4562 | 0 | 0 | 0 | 1 Ref      |
| MH271296 | Unassigned | Unassigned | Unassigned | 949_0   | Clustered           | 10 VC_949_0  | 10  | 0.5977 | 1          | 0.5977 | 0 | 0 | 0 | 1 Ref      |
| MH271297 | Unassigned | Unassigned | Unassigned | 956_0   | Clustered           | 39 VC_956_0  | 39  | 1      | 1          | 1      | 0 | 0 | 0 | 1 Ref      |
| MH271298 | Unassigned | Unassigned | Unassigned | 1206_0  | Clustered           | 8 VC_1206_0  | 8   | 0.1913 | 1          | 0.1913 | 0 | 0 | 0 | 1 Ref      |
| MH271299 | Unassigned | Unassigned | Unassigned | 956_0   | Clustered           | 39 VC_956_0  | 39  | 1      | 1          | 1      | 0 | 0 | 0 | 1 Ref      |
| MH271300 | Unassigned | Unassigned | Unassigned | 856_1   | Clustered           | 13 VC_856_1  | 13  | 0.5848 | 1          | 0.5848 | 0 | 0 | 0 | 1 Ref      |
| MH271301 | Unassigned | Unassigned | Unassigned | 1343_0  | Clustered           | 21 VC_1343_0 | 21  | 0.9843 | 1          | 0.9843 | 0 | 0 | 0 | 1 Ref      |
| MH271302 | Unassigned | Unassigned | Unassigned | 919_0   | Clustered           | 39 VC_919_0  | 39  | 0.9069 | 1          | 0.9069 | 0 | 0 | 0 | 1 Ref      |



|          |            |            |            |        |                     |              |     |        |            |        |   |   |   |            |
|----------|------------|------------|------------|--------|---------------------|--------------|-----|--------|------------|--------|---|---|---|------------|
| MH271303 | Unassigned | Unassigned | Unassigned | 1349_0 | Clustered           | 7 VC_1349_0  | 7   | 0.2495 | 1          | 0.2495 | 0 | 0 | 0 | 1 Ref      |
| MH271304 | Unassigned | Unassigned | Unassigned | 1352_0 | Clustered           | 31 VC_1352_0 | 31  | 0.849  | 1          | 0.849  | 0 | 0 | 0 | 1 Ref      |
| MH271305 | Unassigned | Unassigned | Unassigned | 410_0  | Clustered           | 7 VC_410_0   | 7   | 0.7905 | 1          | 0.7905 | 0 | 0 | 0 | 1 Ref      |
| MH271306 | Unassigned | Unassigned | Unassigned | 956_0  | Clustered           | 39 VC_956_0  | 39  | 1      | 1          | 1      | 0 | 0 | 0 | 1 Ref      |
| MH271307 | Unassigned | Unassigned | Unassigned | 856_1  | Clustered           | 13 VC_856_1  | 13  | 0.5848 | 1          | 0.5848 | 0 | 0 | 0 | 1 Ref      |
| MH271308 | Unassigned | Unassigned | Unassigned | 1206_0 | Clustered           | 8 VC_1206_0  | 8   | 0.1913 | 1          | 0.1913 | 0 | 0 | 0 | 1 Ref      |
| MH271309 | Unassigned | Unassigned | Unassigned | 956_0  | Clustered           | 39 VC_956_0  | 39  | 1      | 1          | 1      | 0 | 0 | 0 | 1 Ref      |
| MH271310 | Unassigned | Unassigned | Unassigned | 856_1  | Clustered           | 13 VC_856_1  | 13  | 0.5848 | 1          | 0.5848 | 0 | 0 | 0 | 1 Ref      |
| MH271311 | Unassigned | Unassigned | Unassigned | 956_0  | Clustered           | 39 VC_956_0  | 39  | 1      | 1          | 1      | 0 | 0 | 0 | 1 Ref      |
| MH271312 | Unassigned | Unassigned | Unassigned | 1352_0 | Clustered           | 31 VC_1352_0 | 31  | 0.849  | 1          | 0.849  | 0 | 0 | 0 | 1 Ref      |
| MH271313 | Unassigned | Unassigned | Unassigned | 570_0  | Clustered           | 9 VC_570_0   | 9   | 0.499  | 1          | 0.499  | 0 | 0 | 0 | 1 Ref      |
| MH271314 | Unassigned | Unassigned | Unassigned | 956_0  | Clustered           | 39 VC_956_0  | 39  | 1      | 1          | 1      | 0 | 0 | 0 | 1 Ref      |
| MH271315 | Unassigned | Unassigned | Unassigned | 956_0  | Clustered           | 39 VC_956_0  | 39  | 1      | 1          | 1      | 0 | 0 | 0 | 1 Ref      |
| MH271316 | Unassigned | Unassigned | Unassigned | 856_1  | Clustered           | 13 VC_856_1  | 13  | 0.5848 | 1          | 0.5848 | 0 | 0 | 0 | 1 Ref      |
| MH271317 | Unassigned | Unassigned | Unassigned | 1200_0 | Clustered           | 4 VC_1200_0  | 4   | 0.8691 | 0.9999992  | 0.8691 | 0 | 0 | 0 | 1 Ref      |
| MH271318 | Unassigned | Unassigned | Unassigned | 410_0  | Clustered           | 7 VC_410_0   | 7   | 0.7905 | 1          | 0.7905 | 0 | 0 | 0 | 1 Ref      |
| MH271319 | Unassigned | Unassigned | Unassigned | 956_0  | Clustered           | 39 VC_956_0  | 39  | 1      | 1          | 1      | 0 | 0 | 0 | 1 Ref      |
| MH271320 | Unassigned | Unassigned | Unassigned | 1206_0 | Clustered           | 8 VC_1206_0  | 8   | 0.1913 | 1          | 0.1913 | 0 | 0 | 0 | 1 Ref      |
| MH271321 | Unassigned | Unassigned | Unassigned | 1352_0 | Clustered           | 31 VC_1352_0 | 31  | 0.849  | 1          | 0.849  | 0 | 0 | 0 | 1 Ref      |
| MH285980 | Unassigned | Unassigned | Unassigned | 575_0  | Clustered           | 35 VC_575_0  | 35  | 0.8815 | 1          | 0.8815 | 0 | 0 | 0 | 1 Ref      |
| MH299806 | Unassigned | Unassigned | Unassigned | 980_0  | Clustered           | 10 VC_980_0  | 10  | 0.9996 | 1          | 0.9996 | 0 | 0 | 0 | 1 Ref      |
| MH310933 | Unassigned | Unassigned | Unassigned | 495_0  | Clustered           | 39 VC_495_0  | 39  | 0.308  | 1          | 0.308  | 0 | 0 | 0 | 1 Ref      |
| MH310934 | Unassigned | Unassigned | Unassigned | 495_1  | Clustered           | 41 VC_495_1  | 41  | 0.328  | 1          | 0.328  | 0 | 0 | 0 | 0.911 Ref  |
| MH310935 | Unassigned | Unassigned | Unassigned | 495_0  | Clustered           | 39 VC_495_0  | 39  | 0.308  | 1          | 0.308  | 0 | 0 | 0 | 1 Ref      |
| MH310936 | Unassigned | Unassigned | Unassigned | 495_1  | Clustered           | 41 VC_495_1  | 41  | 0.328  | 1          | 0.328  | 0 | 0 | 0 | 0.911 Ref  |
| MH316561 | Unassigned | Unassigned | Unassigned | 558_14 | Clustered           | 8 VC_558_14  | 8   | 0.0228 | 0.99945246 | 0.0228 | 0 | 0 | 0 | 0.8214 Ref |
| MH316562 | Unassigned | Unassigned | Unassigned | 565_0  | Clustered           | 20 VC_565_0  | 20  | 0.8398 | 1          | 0.8398 | 0 | 0 | 0 | 1 Ref      |
| MH316563 | Unassigned | Unassigned | Unassigned | 513_0  | Clustered           | 32 VC_513_0  | 32  | 0.6881 | 1          | 0.6881 | 0 | 0 | 0 | 1 Ref      |
| MH316564 | Unassigned | Unassigned | Unassigned | 520_45 | Clustered           | 7 VC_520_45  | 7   | 0.0635 | 1          | 0.0635 | 0 | 0 | 0 | 0.8095 Ref |
| MH316565 | Unassigned | Unassigned | Unassigned | 509_0  | Clustered           | 37 VC_509_0  | 37  | 0.9689 | 1          | 0.9689 | 0 | 0 | 0 | 1 Ref      |
| MH316566 | Unassigned | Unassigned | Unassigned | 224_0  | Clustered           | 19 VC_224_0  | 19  | 0.9416 | 1          | 0.9416 | 0 | 0 | 0 | 1 Ref      |
| MH316567 | Unassigned | Unassigned | Unassigned | 558_50 | Clustered           | 15 VC_558_50 | 15  | 0.0468 | 1          | 0.0468 | 0 | 0 | 0 | 0.9238 Ref |
| MH316568 | Unassigned | Unassigned | Unassigned | 371_13 | Clustered           | 33 VC_371_13 | 33  | 0.179  | 1          | 0.179  | 0 | 0 | 0 | 0.8769 Ref |
| MH316569 | Unassigned | Unassigned | Unassigned | 956_0  | Clustered           | 39 VC_956_0  | 39  | 1      | 1          | 1      | 0 | 0 | 0 | 1 Ref      |
| MH316570 | Unassigned | Unassigned | Unassigned | 521_0  | Clustered           | 37 VC_521_0  | 37  | 0.912  | 1          | 0.912  | 0 | 0 | 0 | 1 Ref      |
| MH319720 | Unassigned | Unassigned | Unassigned | 438_0  | Clustered           | 6 VC_438_0   | 6   | 0.0917 | 0.99994271 | 0.0917 | 0 | 0 | 0 | 1 Ref      |
| MH319733 | Unassigned | Unassigned | Unassigned | 438_0  | Clustered           | 6 VC_438_0   | 6   | 0.0917 | 0.99994271 | 0.0917 | 0 | 0 | 0 | 1 Ref      |
| MH319737 | Unassigned | Unassigned | Unassigned | 659_0  | Clustered           | 2 VC_659_0   | 2   | 0.0254 | 0.54508917 | 0.0139 | 0 | 0 | 0 | 1 Ref      |
| MH319742 | Unassigned | Unassigned | Unassigned | 438_0  | Clustered           | 6 VC_438_0   | 6   | 0.0917 | 0.99994271 | 0.0917 | 0 | 0 | 0 | 1 Ref      |
| MH319746 | Unassigned | Unassigned | Unassigned | 659_0  | Clustered           | 2 VC_659_0   | 2   | 0.0254 | 0.54508917 | 0.0139 | 0 | 0 | 0 | 1 Ref      |
| MH319749 | Unassigned | Unassigned | Unassigned | 432_6  | Clustered/Singleton | 1 VC_432_6   | 1   | 0      | 1          | 0      | 0 | 0 | 0 | 1 Ref      |
| MH319750 | Unassigned | Unassigned | Unassigned | 439_0  | Clustered           | 2 VC_439_0   | 2   | 0.0291 | 0.90533848 | 0.0263 | 0 | 0 | 0 | 1 Ref      |
| MH319753 | Unassigned | Unassigned | Unassigned | 438_0  | Clustered           | 6 VC_438_0   | 6   | 0.0917 | 0.99994271 | 0.0917 | 0 | 0 | 0 | 1 Ref      |
| MH319754 | Unassigned | Unassigned | Unassigned | 432_7  | Clustered/Singleton | 1 VC_432_7   | 1   | 0      | 1          | 0      | 0 | 0 | 0 | 1 Ref      |
| MH319758 | Unassigned | Unassigned | Unassigned | 438_0  | Clustered           | 6 VC_438_0   | 6   | 0.0917 | 0.99994271 | 0.0917 | 0 | 0 | 0 | 1 Ref      |
| MH319759 | Unassigned | Unassigned | Unassigned | 439_0  | Clustered           | 2 VC_439_0   | 2   | 0.0291 | 0.90533848 | 0.0263 | 0 | 0 | 0 | 1 Ref      |
| MH321490 | Unassigned | Unassigned | Unassigned | 150_0  | Clustered           | 13 VC_150_0  | 13  | 0.2417 | 1          | 0.2417 | 0 | 0 | 0 | 0.9872 Ref |
| MH321491 | Unassigned | Unassigned | Unassigned | 150_0  | Clustered           | 13 VC_150_0  | 13  | 0.2417 | 1          | 0.2417 | 0 | 0 | 0 | 0.9872 Ref |
| MH321492 | Unassigned | Unassigned | Unassigned | 9_0    | Clustered           | 38 VC_9_0    | 38  | 0.4895 | 1          | 0.4895 | 0 | 0 | 0 | 1 Ref      |
| MH321493 | Unassigned | Unassigned | Unassigned | 461_0  | Clustered           | 96 VC_461_0  | 96  | 0.9307 | 1          | 0.9307 | 0 | 0 | 0 | 0.9575 Ref |
| MH327487 | Unassigned | Unassigned | Unassigned | 438_0  | Clustered           | 6 VC_438_0   | 6   | 0.0917 | 0.99994271 | 0.0917 | 0 | 0 | 0 | 1 Ref      |
| MH333064 | Unassigned | Unassigned | Unassigned | 491_0  | Clustered           | 36 VC_491_0  | 36  | 0.5336 | 1          | 0.5336 | 0 | 0 | 0 | 0.9714 Ref |
| MH338234 | Unassigned | Unassigned | Unassigned | 216_6  | Clustered           | 42 VC_216_6  | 42  | 0.473  | 1          | 0.473  | 0 | 0 | 0 | 0.8351 Ref |
| MH338235 | Unassigned | Unassigned | Unassigned | 940_0  | Clustered           | 34 VC_940_0  | 34  | 0.7959 | 1          | 0.7959 | 0 | 0 | 0 | 1 Ref      |
| MH338236 | Unassigned | Unassigned | Unassigned | 221_0  | Clustered           | 22 VC_221_0  | 22  | 0.7447 | 1          | 0.7447 | 0 | 0 | 0 | 1 Ref      |
| MH338237 | Unassigned | Unassigned | Unassigned | 221_0  | Clustered           | 22 VC_221_0  | 22  | 0.7447 | 1          | 0.7447 | 0 | 0 | 0 | 1 Ref      |
| MH338238 | Unassigned | Unassigned | Unassigned | 325_19 | Clustered           | 3 VC_325_19  | 3   | 0.0108 | 0.99859221 | 0.0107 | 0 | 0 | 0 | 1 Ref      |
| MH338239 | Unassigned | Unassigned | Unassigned | 325_60 | Clustered           | 2 VC_325_60  | 2   | 0.0038 | 0.957513   | 0.0036 | 0 | 0 | 0 | 1 Ref      |
| MH338240 | Unassigned | Unassigned | Unassigned | 514_0  | Clustered           | 75 VC_514_0  | 75  | 0.9402 | 1          | 0.9402 | 0 | 0 | 0 | 1 Ref      |
| MH338241 | Unassigned | Unassigned | Unassigned | 940_0  | Clustered           | 34 VC_940_0  | 34  | 0.7959 | 1          | 0.7959 | 0 | 0 | 0 | 1 Ref      |
| MH341451 | Unassigned | Unassigned | Unassigned | 380_0  | Clustered           | 3 VC_380_0   | 3   | 0.1631 | 0.99675097 | 0.1625 | 0 | 0 | 0 | 1 Ref      |
| MH341452 | Unassigned | Unassigned | Unassigned | 378_0  | Clustered           | 9 VC_378_0   | 9   | 0.7603 | 1          | 0.7603 | 0 | 0 | 0 | 1 Ref      |
| MH341453 | Unassigned | Unassigned | Unassigned | 140_0  | Clustered           | 2 VC_140_0   | 2   | 0.4111 | 0.94824791 | 0.3898 | 0 | 0 | 0 | 1 Ref      |
| MH355583 | Unassigned | Unassigned | Unassigned | 695_0  | Clustered           | 48 VC_695_0  | 48  | 0.8162 | 1          | 0.8162 | 0 | 0 | 0 | 1 Ref      |
| MH355584 | Unassigned | Unassigned | Unassigned | 283_45 | Clustered/Singleton | 1 VC_283_45  | 1   | 0      | 1          | 0      | 0 | 0 | 0 | 1 Ref      |
| MH356729 | Unassigned | Unassigned | Unassigned | 838_0  | Clustered           | 29 VC_838_0  | 29  | 0.8611 | 1          | 0.8611 | 0 | 0 | 0 | 1 Ref      |
| MH356730 | Unassigned | Unassigned | Unassigned | 667_1  | Clustered/Singleton | 1 VC_667_1   | 1   | 0      | 1          | 0      | 0 | 0 | 0 | 1 Ref      |
| MH358359 | Unassigned | Unassigned | Unassigned | 637_0  | Clustered           | 115 VC_637_0 | 115 | 0.731  | 1          | 0.731  | 0 | 0 | 0 | 0.8764 Ref |
| MH358458 | Unassigned | Unassigned | Unassigned | 779_0  | Clustered           | 37 VC_779_0  | 37  | 0.5682 | 1          | 0.5682 | 0 | 0 | 0 | 1 Ref      |
| MH359124 | Unassigned | Unassigned | Unassigned | 286_11 | Clustered           | 3 VC_286_11  | 3   | 0.0146 | 0.93460284 | 0.0137 | 0 | 0 | 0 | 1 Ref      |
| MH363700 | Unassigned | Unassigned | Unassigned | 134_0  | Clustered           | 3 VC_134_0   | 3   | 0.0956 | 0.99858494 | 0.0955 | 0 | 0 | 0 | 1 Ref      |
| MH363708 | Unassigned | Unassigned | Unassigned | 705_0  | Clustered           | 11 VC_705_0  | 11  | 0.8861 | 1          | 0.8861 | 0 | 0 | 0 | 1 Ref      |
| MH370358 | Unassigned | Unassigned | Unassigned | 637_0  | Clustered           | 115 VC_637_0 | 115 | 0.731  | 1          | 0.731  | 0 | 0 | 0 | 0.8764 Ref |
| MH370359 | Unassigned | Unassigned | Unassigned | 637_0  | Clustered           | 115 VC_637_0 | 115 | 0.731  | 1          | 0.731  | 0 | 0 | 0 | 0.8764 Ref |
| MH370360 | Unassigned | Unassigned | Unassigned | 637_0  | Clustered           | 115 VC_637_0 | 115 | 0.731  | 1          | 0.731  | 0 | 0 | 0 | 0.8764 Ref |
| MH370361 | Unassigned | Unassigned | Unassigned | 637_0  | Clustered           | 115 VC_637_0 | 115 | 0.731  | 1          | 0.731  | 0 | 0 | 0 | 0.8764 Ref |
| MH370362 | Unassigned | Unassigned | Unassigned | 637_0  | Clustered           | 115 VC_637_0 | 115 | 0.731  | 1          | 0.731  | 0 | 0 | 0 | 0.8764 Ref |
| MH370363 | Unassigned | Unassigned | Unassigned | 637_0  | Clustered           | 115 VC_637_0 | 115 | 0.731  | 1          | 0.731  | 0 | 0 | 0 | 0.8764 Ref |
| MH370365 | Unassigned | Unassigned | Unassigned | 637_0  | Clustered           | 115 VC_637_0 | 115 | 0.731  | 1          | 0.731  | 0 | 0 | 0 | 0.8764 Ref |
| MH370366 | Unassigned | Unassigned | Unassigned | 191_4  | Clustered           | 2 VC_191_4   | 2   | 0.0055 | 0.88936514 | 0.0049 | 0 | 0 | 0 | 1 Ref      |
| MH370367 | Unassigned | Unassigned | Unassigned | 191_9  | Clustered           | 5 VC_191_9   | 5   | 0.0228 | 0.99999662 | 0.0228 | 0 | 0 | 0 | 0.7 Ref    |



|          |            |            |            |        |                     |              |     |        |            |        |   |   |   |            |
|----------|------------|------------|------------|--------|---------------------|--------------|-----|--------|------------|--------|---|---|---|------------|
| MH370368 | Unassigned | Unassigned | Unassigned | 133_3  | Clustered           | 3 VC_133_3   | 3   | 0.0105 | 0.99119575 | 0.0104 | 0 | 0 | 0 | 1 Ref      |
| MH370369 | Unassigned | Unassigned | Unassigned | 191_16 | Clustered           | 12 VC_191_16 | 12  | 0.0643 | 1          | 0.0643 | 0 | 0 | 0 | 0.9394 Ref |
| MH370370 | Unassigned | Unassigned | Unassigned | 133_31 | Clustered           | 6 VC_133_31  | 6   | 0.0263 | 0.99999694 | 0.0263 | 0 | 0 | 0 | 1 Ref      |
| MH370371 | Unassigned | Unassigned | Unassigned | 133_3  | Clustered           | 3 VC_133_3   | 3   | 0.0105 | 0.99119575 | 0.0104 | 0 | 0 | 0 | 1 Ref      |
| MH370372 | Unassigned | Unassigned | Unassigned | 637_0  | Clustered           | 115 VC_637_0 | 115 | 0.731  | 1          | 0.731  | 0 | 0 | 0 | 0.8764 Ref |
| MH370373 | Unassigned | Unassigned | Unassigned | 637_0  | Clustered           | 115 VC_637_0 | 115 | 0.731  | 1          | 0.731  | 0 | 0 | 0 | 0.8764 Ref |
| MH370374 | Unassigned | Unassigned | Unassigned | 637_0  | Clustered           | 115 VC_637_0 | 115 | 0.731  | 1          | 0.731  | 0 | 0 | 0 | 0.8764 Ref |
| MH370375 | Unassigned | Unassigned | Unassigned | 191_29 | Clustered/Singleton | 1 VC_191_29  | 1   | 0      | 1          | 0      | 0 | 0 | 0 | 1 Ref      |
| MH370376 | Unassigned | Unassigned | Unassigned | 191_8  | Clustered           | 2 VC_191_8   | 2   | 0.0055 | 0.91831352 | 0.0051 | 0 | 0 | 0 | 1 Ref      |
| MH370377 | Unassigned | Unassigned | Unassigned | 190_13 | Clustered           | 4 VC_190_13  | 4   | 0.0216 | 0.99997041 | 0.0216 | 0 | 0 | 0 | 0.6667 Ref |
| MH370378 | Unassigned | Unassigned | Unassigned | 190_13 | Clustered           | 4 VC_190_13  | 4   | 0.0216 | 0.99997041 | 0.0216 | 0 | 0 | 0 | 0.6667 Ref |
| MH370379 | Unassigned | Unassigned | Unassigned | 191_23 | Clustered/Singleton | 1 VC_191_23  | 1   | 0      | 1          | 0      | 0 | 0 | 0 | 1 Ref      |
| MH370380 | Unassigned | Unassigned | Unassigned | 191_9  | Clustered           | 5 VC_191_9   | 5   | 0.0228 | 0.99999662 | 0.0228 | 0 | 0 | 0 | 0.7 Ref    |
| MH370381 | Unassigned | Unassigned | Unassigned | 637_0  | Clustered           | 115 VC_637_0 | 115 | 0.731  | 1          | 0.731  | 0 | 0 | 0 | 0.8764 Ref |
| MH370384 | Unassigned | Unassigned | Unassigned | 637_0  | Clustered           | 115 VC_637_0 | 115 | 0.731  | 1          | 0.731  | 0 | 0 | 0 | 0.8764 Ref |
| MH370385 | Unassigned | Unassigned | Unassigned | 637_0  | Clustered           | 115 VC_637_0 | 115 | 0.731  | 1          | 0.731  | 0 | 0 | 0 | 0.8764 Ref |
| MH370386 | Unassigned | Unassigned | Unassigned | 191_5  | Clustered           | 6 VC_191_5   | 6   | 0.0285 | 0.99999996 | 0.0285 | 0 | 0 | 0 | 1 Ref      |
| MH370387 | Unassigned | Unassigned | Unassigned | 28_1   | Clustered           | 53 VC_28_1   | 53  | 0.7164 | 1          | 0.7164 | 0 | 0 | 0 | 0.9325 Ref |
| MH370477 | Unassigned | Unassigned | Unassigned | 394_0  | Clustered           | 2 VC_394_0   | 2   | 0.0211 | 0.957922   | 0.0202 | 0 | 0 | 0 | 1 Ref      |
| MH370478 | Unassigned | Unassigned | Unassigned | 76_0   | Clustered           | 37 VC_76_0   | 37  | 0.9403 | 1          | 0.9403 | 0 | 0 | 0 | 1 Ref      |
| MH371107 | Unassigned | Unassigned | Unassigned | 371_13 | Clustered           | 33 VC_371_13 | 33  | 0.179  | 1          | 0.179  | 0 | 0 | 0 | 0.8769 Ref |
| MH371108 | Unassigned | Unassigned | Unassigned | 856_0  | Clustered           | 7 VC_856_0   | 7   | 0.3463 | 1          | 0.3463 | 0 | 0 | 0 | 1 Ref      |
| MH371109 | Unassigned | Unassigned | Unassigned | 856_0  | Clustered           | 7 VC_856_0   | 7   | 0.3463 | 1          | 0.3463 | 0 | 0 | 0 | 1 Ref      |
| MH371110 | Unassigned | Unassigned | Unassigned | 325_36 | Clustered           | 2 VC_325_36  | 2   | 0.0043 | 0.95751115 | 0.0041 | 0 | 0 | 0 | 1 Ref      |
| MH371111 | Unassigned | Unassigned | Unassigned | 1344_0 | Clustered           | 78 VC_1344_0 | 78  | 0.9732 | 1          | 0.9732 | 0 | 0 | 0 | 1 Ref      |
| MH371112 | Unassigned | Unassigned | Unassigned | 551_6  | Clustered           | 22 VC_551_6  | 22  | 0.1214 | 1          | 0.1214 | 0 | 0 | 0 | 0.8095 Ref |
| MH371113 | Unassigned | Unassigned | Unassigned | 236_0  | Clustered           | 72 VC_236_0  | 72  | 0.8104 | 1          | 0.8104 | 0 | 0 | 0 | 1 Ref      |
| MH371114 | Unassigned | Unassigned | Unassigned | 371_16 | Clustered           | 42 VC_371_16 | 42  | 0.1341 | 1          | 0.1341 | 0 | 0 | 0 | 0.7282 Ref |
| MH371115 | Unassigned | Unassigned | Unassigned | 520_40 | Clustered           | 4 VC_520_40  | 4   | 0.0396 | 0.99998776 | 0.0396 | 0 | 0 | 0 | 1 Ref      |
| MH371116 | Unassigned | Unassigned | Unassigned | 761_0  | Clustered           | 67 VC_761_0  | 67  | 0.8947 | 1          | 0.8947 | 0 | 0 | 0 | 1 Ref      |
| MH371117 | Unassigned | Unassigned | Unassigned | 371_16 | Clustered           | 42 VC_371_16 | 42  | 0.1341 | 1          | 0.1341 | 0 | 0 | 0 | 0.7282 Ref |
| MH371118 | Unassigned | Unassigned | Unassigned | 1344_0 | Clustered           | 78 VC_1344_0 | 78  | 0.9732 | 1          | 0.9732 | 0 | 0 | 0 | 1 Ref      |
| MH371119 | Unassigned | Unassigned | Unassigned | 761_0  | Clustered           | 67 VC_761_0  | 67  | 0.8947 | 1          | 0.8947 | 0 | 0 | 0 | 1 Ref      |
| MH371120 | Unassigned | Unassigned | Unassigned | 520_39 | Clustered/Singleton | 1 VC_520_39  | 1   | 0      | 1          | 0      | 0 | 0 | 0 | 1 Ref      |
| MH371121 | Unassigned | Unassigned | Unassigned | 514_0  | Clustered           | 75 VC_514_0  | 75  | 0.9402 | 1          | 0.9402 | 0 | 0 | 0 | 1 Ref      |
| MH371122 | Unassigned | Unassigned | Unassigned | 225_0  | Clustered           | 32 VC_225_0  | 32  | 0.848  | 1          | 0.848  | 0 | 0 | 0 | 0.996 Ref  |
| MH371123 | Unassigned | Unassigned | Unassigned | 520_33 | Clustered           | 2 VC_520_33  | 2   | 0.0087 | 0.95761571 | 0.0083 | 0 | 0 | 0 | 1 Ref      |
| MH371124 | Unassigned | Unassigned | Unassigned | 1344_0 | Clustered           | 78 VC_1344_0 | 78  | 0.9732 | 1          | 0.9732 | 0 | 0 | 0 | 1 Ref      |
| MH371125 | Unassigned | Unassigned | Unassigned | 371_16 | Clustered           | 42 VC_371_16 | 42  | 0.1341 | 1          | 0.1341 | 0 | 0 | 0 | 0.7282 Ref |
| MH375074 | Unassigned | Unassigned | Unassigned | 695_0  | Clustered           | 48 VC_695_0  | 48  | 0.8162 | 1          | 0.8162 | 0 | 0 | 0 | 1 Ref      |
| MH375593 | Unassigned | Unassigned | Unassigned | 254_0  | Clustered           | 46 VC_254_0  | 46  | 0.5159 | 1          | 0.5159 | 0 | 0 | 0 | 1 Ref      |
| MH375594 | Unassigned | Unassigned | Unassigned | 252_0  | Clustered           | 121 VC_252_0 | 121 | 0.7376 | 1          | 0.7376 | 0 | 0 | 0 | 0.9999 Ref |
| MH375595 | Unassigned | Unassigned | Unassigned | 252_0  | Clustered           | 121 VC_252_0 | 121 | 0.7376 | 1          | 0.7376 | 0 | 0 | 0 | 0.9999 Ref |
| MH375596 | Unassigned | Unassigned | Unassigned | 252_0  | Clustered           | 121 VC_252_0 | 121 | 0.7376 | 1          | 0.7376 | 0 | 0 | 0 | 0.9999 Ref |
| MH375597 | Unassigned | Unassigned | Unassigned | 252_0  | Clustered           | 121 VC_252_0 | 121 | 0.7376 | 1          | 0.7376 | 0 | 0 | 0 | 0.9999 Ref |
| MH375598 | Unassigned | Unassigned | Unassigned | 252_0  | Clustered           | 121 VC_252_0 | 121 | 0.7376 | 1          | 0.7376 | 0 | 0 | 0 | 0.9999 Ref |
| MH375599 | Unassigned | Unassigned | Unassigned | 252_0  | Clustered           | 121 VC_252_0 | 121 | 0.7376 | 1          | 0.7376 | 0 | 0 | 0 | 0.9999 Ref |
| MH375600 | Unassigned | Unassigned | Unassigned | 252_0  | Clustered           | 121 VC_252_0 | 121 | 0.7376 | 1          | 0.7376 | 0 | 0 | 0 | 0.9999 Ref |
| MH375644 | Unassigned | Unassigned | Unassigned | 136_0  | Clustered           | 2 VC_136_0   | 2   | 0.0412 | 0.95741268 | 0.0394 | 0 | 0 | 0 | 1 Ref      |
| MH378441 | Unassigned | Unassigned | Unassigned | 303_0  | Clustered           | 155 VC_303_0 | 155 | 0.9979 | 1          | 0.9979 | 0 | 0 | 0 | 1 Ref      |
| MH378442 | Unassigned | Unassigned | Unassigned | 303_0  | Clustered           | 155 VC_303_0 | 155 | 0.9979 | 1          | 0.9979 | 0 | 0 | 0 | 1 Ref      |
| MH378443 | Unassigned | Unassigned | Unassigned | 303_0  | Clustered           | 155 VC_303_0 | 155 | 0.9979 | 1          | 0.9979 | 0 | 0 | 0 | 1 Ref      |
| MH382198 | Unassigned | Unassigned | Unassigned | 392_0  | Clustered           | 126 VC_392_0 | 126 | 0.9621 | 1          | 0.9621 | 0 | 0 | 0 | 1 Ref      |
| MH383160 | Unassigned | Unassigned | Unassigned | 164_11 | Clustered           | 10 VC_164_11 | 10  | 0.1507 | 1          | 0.1507 | 0 | 0 | 0 | 0.9111 Ref |
| MH384259 | Unassigned | Unassigned | Unassigned | 10_0   | Clustered           | 25 VC_10_0   | 25  | 0.3467 | 1          | 0.3467 | 0 | 0 | 0 | 0.9733 Ref |
| MH384260 | Unassigned | Unassigned | Unassigned | 7_0    | Clustered           | 28 VC_7_0    | 28  | 0.3916 | 1          | 0.3916 | 0 | 0 | 0 | 0.9947 Ref |
| MH384261 | Unassigned | Unassigned | Unassigned | 8_0    | Clustered           | 58 VC_8_0    | 58  | 0.8306 | 1          | 0.8306 | 0 | 0 | 0 | 0.9946 Ref |
| MH389777 | Unassigned | Unassigned | Unassigned | 67_4   | Clustered           | 4 VC_67_4    | 4   | 0.0431 | 0.90943035 | 0.0392 | 0 | 0 | 0 | 1 Ref      |
| MH393889 | Unassigned | Unassigned | Unassigned | 899_0  | Clustered           | 4 VC_899_0   | 4   | 0.2655 | 0.99997104 | 0.2655 | 0 | 0 | 0 | 1 Ref      |
| MH399771 | Unassigned | Unassigned | Unassigned | 520_42 | Clustered/Singleton | 1 VC_520_42  | 1   | 0      | 1          | 0      | 0 | 0 | 0 | 1 Ref      |
| MH399772 | Unassigned | Unassigned | Unassigned | 546_0  | Clustered           | 2 VC_546_0   | 2   | 0.0136 | 0.63748598 | 0.0087 | 0 | 0 | 0 | 1 Ref      |
| MH399773 | Unassigned | Unassigned | Unassigned | 371_16 | Clustered           | 42 VC_371_16 | 42  | 0.1341 | 1          | 0.1341 | 0 | 0 | 0 | 0.7282 Ref |
| MH399774 | Unassigned | Unassigned | Unassigned | 551_0  | Clustered           | 16 VC_551_0  | 16  | 0.0915 | 1          | 0.0915 | 0 | 0 | 0 | 0.6667 Ref |
| MH399775 | Unassigned | Unassigned | Unassigned | 371_15 | Clustered           | 44 VC_371_15 | 44  | 0.1391 | 1          | 0.1391 | 0 | 0 | 0 | 0.7474 Ref |
| MH399776 | Unassigned | Unassigned | Unassigned | 514_0  | Clustered           | 75 VC_514_0  | 75  | 0.9402 | 1          | 0.9402 | 0 | 0 | 0 | 1 Ref      |
| MH399777 | Unassigned | Unassigned | Unassigned | 517_1  | Clustered           | 108 VC_517_1 | 108 | 0.8483 | 1          | 0.8483 | 0 | 0 | 0 | 0.9955 Ref |
| MH399778 | Unassigned | Unassigned | Unassigned | 551_0  | Clustered           | 16 VC_551_0  | 16  | 0.0915 | 1          | 0.0915 | 0 | 0 | 0 | 0.6667 Ref |
| MH399779 | Unassigned | Unassigned | Unassigned | 856_1  | Clustered           | 13 VC_856_1  | 13  | 0.5848 | 1          | 0.5848 | 0 | 0 | 0 | 1 Ref      |
| MH399780 | Unassigned | Unassigned | Unassigned | 371_16 | Clustered           | 42 VC_371_16 | 42  | 0.1341 | 1          | 0.1341 | 0 | 0 | 0 | 0.7282 Ref |
| MH399781 | Unassigned | Unassigned | Unassigned | 954_0  | Clustered           | 13 VC_954_0  | 13  | 0.863  | 1          | 0.863  | 0 | 0 | 0 | 1 Ref      |
| MH399782 | Unassigned | Unassigned | Unassigned | 325_53 | Clustered           | 7 VC_325_53  | 7   | 0.0242 | 1          | 0.0242 | 0 | 0 | 0 | 0.9048 Ref |
| MH399783 | Unassigned | Unassigned | Unassigned | 1344_0 | Clustered           | 78 VC_1344_0 | 78  | 0.9732 | 1          | 0.9732 | 0 | 0 | 0 | 1 Ref      |
| MH399784 | Unassigned | Unassigned | Unassigned | 520_45 | Clustered           | 7 VC_520_45  | 7   | 0.0635 | 1          | 0.0635 | 0 | 0 | 0 | 0.8095 Ref |
| MH399785 | Unassigned | Unassigned | Unassigned | 517_1  | Clustered           | 108 VC_517_1 | 108 | 0.8483 | 1          | 0.8483 | 0 | 0 | 0 | 0.9955 Ref |
| MH399786 | Unassigned | Unassigned | Unassigned | 371_15 | Clustered           | 44 VC_371_15 | 44  | 0.1391 | 1          | 0.1391 | 0 | 0 | 0 | 0.7474 Ref |
| MH399787 | Unassigned | Unassigned | Unassigned | 521_0  | Clustered           | 37 VC_521_0  | 37  | 0.912  | 1          | 0.912  | 0 | 0 | 0 | 1 Ref      |
| MH399788 | Unassigned | Unassigned | Unassigned | 565_0  | Clustered           | 20 VC_565_0  | 20  | 0.8398 | 1          | 0.8398 | 0 | 0 | 0 | 1 Ref      |
| MH399789 | Unassigned | Unassigned | Unassigned | 1164_0 | Clustered           | 25 VC_1164_0 | 25  | 0.7312 | 1          | 0.7312 | 0 | 0 | 0 | 1 Ref      |
| MH400309 | Unassigned | Unassigned | Unassigned | 451_0  | Clustered           | 80 VC_451_0  | 80  | 0.9991 | 1          | 0.9991 | 0 | 0 | 0 | 1 Ref      |
| MH401414 | Unassigned | Unassigned | Unassigned | 7_0    | Clustered           | 28 VC_7_0    | 28  | 0.3916 | 1          | 0.3916 | 0 | 0 | 0 | 0.9947 Ref |
| MH401415 | Unassigned | Unassigned | Unassigned | 7_0    | Clustered           | 28 VC_7_0    | 28  | 0.3916 | 1          | 0.3916 | 0 | 0 | 0 | 0.9947 Ref |



|          |            |            |            |        |                     |              |     |        |            |        |   |   |   |        |     |
|----------|------------|------------|------------|--------|---------------------|--------------|-----|--------|------------|--------|---|---|---|--------|-----|
| MH401416 | Unassigned | Unassigned | Unassigned | 10_0   | Clustered           | 25 VC_10_0   | 25  | 0.3467 | 1          | 0.3467 | 0 | 0 | 0 | 0.9733 | Ref |
| MH412654 | Unassigned | Unassigned | Unassigned | 432_1  | Clustered/Singleton | 1 VC_432_1   | 1   | 0      | 1          | 0      | 0 | 0 | 0 | 1      | Ref |
| MH422554 | Unassigned | Unassigned | Unassigned | 247_0  | Clustered           | 14 VC_247_0  | 14  | 0.9119 | 1          | 0.9119 | 0 | 0 | 0 | 0.967  | Ref |
| MH424443 | Unassigned | Unassigned | Unassigned | 637_0  | Clustered           | 115 VC_637_0 | 115 | 0.731  | 1          | 0.731  | 0 | 0 | 0 | 0.8764 | Ref |
| MH424444 | Unassigned | Unassigned | Unassigned | 540_0  | Clustered           | 15 VC_540_0  | 15  | 0.2866 | 1          | 0.2866 | 0 | 0 | 0 | 1      | Ref |
| MH424445 | Unassigned | Unassigned | Unassigned | 637_0  | Clustered           | 115 VC_637_0 | 115 | 0.731  | 1          | 0.731  | 0 | 0 | 0 | 0.8764 | Ref |
| MH424446 | Unassigned | Unassigned | Unassigned | 461_0  | Clustered           | 96 VC_461_0  | 96  | 0.9307 | 1          | 0.9307 | 0 | 0 | 0 | 0.9575 | Ref |
| MH426724 | Unassigned | Unassigned | Unassigned | 959_3  | Clustered           | 3 VC_959_3   | 3   | 0.0237 | 0.75911548 | 0.018  | 0 | 0 | 0 | 1      | Ref |
| MH426725 | Unassigned | Unassigned | Unassigned | 328_0  | Clustered           | 11 VC_328_0  | 11  | 0.4707 | 1          | 0.4707 | 0 | 0 | 0 | 1      | Ref |
| MH426726 | Unassigned | Unassigned | Unassigned | 359_0  | Clustered           | 7 VC_359_0   | 7   | 0.3703 | 1          | 0.3703 | 0 | 0 | 0 | 1      | Ref |
| MH427377 | Unassigned | Unassigned | Unassigned | 133_22 | Clustered           | 13 VC_133_22 | 13  | 0.0804 | 1          | 0.0804 | 0 | 0 | 0 | 0.8205 | Ref |
| MH431931 | Unassigned | Unassigned | Unassigned | 708_0  | Clustered           | 47 VC_708_0  | 47  | 0.8654 | 1          | 0.8654 | 0 | 0 | 0 | 1      | Ref |
| MH431932 | Unassigned | Unassigned | Unassigned | 708_0  | Clustered           | 47 VC_708_0  | 47  | 0.8654 | 1          | 0.8654 | 0 | 0 | 0 | 1      | Ref |
| MH431933 | Unassigned | Unassigned | Unassigned | 708_0  | Clustered           | 47 VC_708_0  | 47  | 0.8654 | 1          | 0.8654 | 0 | 0 | 0 | 1      | Ref |
| MH431934 | Unassigned | Unassigned | Unassigned | 708_0  | Clustered           | 47 VC_708_0  | 47  | 0.8654 | 1          | 0.8654 | 0 | 0 | 0 | 1      | Ref |
| MH431935 | Unassigned | Unassigned | Unassigned | 708_0  | Clustered           | 47 VC_708_0  | 47  | 0.8654 | 1          | 0.8654 | 0 | 0 | 0 | 1      | Ref |
| MH431936 | Unassigned | Unassigned | Unassigned | 708_0  | Clustered           | 47 VC_708_0  | 47  | 0.8654 | 1          | 0.8654 | 0 | 0 | 0 | 1      | Ref |
| MH431937 | Unassigned | Unassigned | Unassigned | 708_0  | Clustered           | 47 VC_708_0  | 47  | 0.8654 | 1          | 0.8654 | 0 | 0 | 0 | 1      | Ref |
| MH431938 | Unassigned | Unassigned | Unassigned | 1156_0 | Clustered           | 8 VC_1156_0  | 8   | 0.8137 | 1          | 0.8137 | 0 | 0 | 0 | 1      | Ref |
| MH443100 | Unassigned | Unassigned | Unassigned | 32_0   | Clustered/Singleton | 1 VC_32_0    | 1   | 0      | 1          | 0      | 0 | 0 | 0 | 1      | Ref |
| MH444512 | Unassigned | Unassigned | Unassigned | 851_0  | Clustered           | 2 VC_851_0   | 2   | 0.4472 | 0.9410422  | 0.4209 | 0 | 0 | 0 | 1      | Ref |
| MH445380 | Unassigned | Unassigned | Unassigned | 247_0  | Clustered           | 14 VC_247_0  | 14  | 0.9119 | 1          | 0.9119 | 0 | 0 | 0 | 0.967  | Ref |
| MH445381 | Unassigned | Unassigned | Unassigned | 247_0  | Clustered           | 14 VC_247_0  | 14  | 0.9119 | 1          | 0.9119 | 0 | 0 | 0 | 0.967  | Ref |
| MH445453 | Unassigned | Unassigned | Unassigned | 938_0  | Clustered           | 99 VC_938_0  | 99  | 0.9119 | 1          | 0.9119 | 0 | 0 | 0 | 0.9928 | Ref |
| MH447526 | Unassigned | Unassigned | Unassigned | 1354_0 | Clustered           | 3 VC_1354_0  | 3   | 0.983  | 0.9595722  | 0.9432 | 0 | 0 | 0 | 1      | Ref |
| MH450113 | Unassigned | Unassigned | Unassigned | 325_23 | Clustered           | 17 VC_325_23 | 17  | 0.0716 | 1          | 0.0716 | 0 | 0 | 0 | 0.6397 | Ref |
| MH450114 | Unassigned | Unassigned | Unassigned | 1167_0 | Clustered           | 6 VC_1167_0  | 6   | 0.8642 | 0.99999946 | 0.8642 | 0 | 0 | 0 | 1      | Ref |
| MH450115 | Unassigned | Unassigned | Unassigned | 1164_0 | Clustered           | 25 VC_1164_0 | 25  | 0.7312 | 1          | 0.7312 | 0 | 0 | 0 | 1      | Ref |
| MH450116 | Unassigned | Unassigned | Unassigned | 371_16 | Clustered           | 42 VC_371_16 | 42  | 0.1341 | 1          | 0.1341 | 0 | 0 | 0 | 0.7282 | Ref |
| MH450117 | Unassigned | Unassigned | Unassigned | 1160_0 | Clustered           | 73 VC_1160_0 | 73  | 0.9835 | 1          | 0.9835 | 0 | 0 | 0 | 1      | Ref |
| MH450118 | Unassigned | Unassigned | Unassigned | 1160_0 | Clustered           | 73 VC_1160_0 | 73  | 0.9835 | 1          | 0.9835 | 0 | 0 | 0 | 1      | Ref |
| MH450119 | Unassigned | Unassigned | Unassigned | 514_0  | Clustered           | 75 VC_514_0  | 75  | 0.9402 | 1          | 0.9402 | 0 | 0 | 0 | 1      | Ref |
| MH450120 | Unassigned | Unassigned | Unassigned | 802_0  | Clustered           | 17 VC_802_0  | 17  | 0.8025 | 1          | 0.8025 | 0 | 0 | 0 | 1      | Ref |
| MH450121 | Unassigned | Unassigned | Unassigned | 1160_0 | Clustered           | 73 VC_1160_0 | 73  | 0.9835 | 1          | 0.9835 | 0 | 0 | 0 | 1      | Ref |
| MH450122 | Unassigned | Unassigned | Unassigned | 371_16 | Clustered           | 42 VC_371_16 | 42  | 0.1341 | 1          | 0.1341 | 0 | 0 | 0 | 0.7282 | Ref |
| MH450124 | Unassigned | Unassigned | Unassigned | 514_0  | Clustered           | 75 VC_514_0  | 75  | 0.9402 | 1          | 0.9402 | 0 | 0 | 0 | 1      | Ref |
| MH450125 | Unassigned | Unassigned | Unassigned | 1164_0 | Clustered           | 25 VC_1164_0 | 25  | 0.7312 | 1          | 0.7312 | 0 | 0 | 0 | 1      | Ref |
| MH450126 | Unassigned | Unassigned | Unassigned | 514_0  | Clustered           | 75 VC_514_0  | 75  | 0.9402 | 1          | 0.9402 | 0 | 0 | 0 | 1      | Ref |
| MH450127 | Unassigned | Unassigned | Unassigned | 761_0  | Clustered           | 67 VC_761_0  | 67  | 0.8947 | 1          | 0.8947 | 0 | 0 | 0 | 1      | Ref |
| MH450128 | Unassigned | Unassigned | Unassigned | 514_0  | Clustered           | 75 VC_514_0  | 75  | 0.9402 | 1          | 0.9402 | 0 | 0 | 0 | 1      | Ref |
| MH450129 | Unassigned | Unassigned | Unassigned | 1093_0 | Clustered           | 40 VC_1093_0 | 40  | 0.8754 | 1          | 0.8754 | 0 | 0 | 0 | 1      | Ref |
| MH450130 | Unassigned | Unassigned | Unassigned | 325_23 | Clustered           | 17 VC_325_23 | 17  | 0.0716 | 1          | 0.0716 | 0 | 0 | 0 | 0.6397 | Ref |
| MH450131 | Unassigned | Unassigned | Unassigned | 1160_0 | Clustered           | 73 VC_1160_0 | 73  | 0.9835 | 1          | 0.9835 | 0 | 0 | 0 | 1      | Ref |
| MH450132 | Unassigned | Unassigned | Unassigned | 919_0  | Clustered           | 39 VC_919_0  | 39  | 0.9069 | 1          | 0.9069 | 0 | 0 | 0 | 1      | Ref |
| MH450133 | Unassigned | Unassigned | Unassigned | 325_61 | Clustered           | 8 VC_325_61  | 8   | 0.0395 | 1          | 0.0395 | 0 | 0 | 0 | 0.7857 | Ref |
| MH454076 | Unassigned | Unassigned | Unassigned | 1156_0 | Clustered           | 8 VC_1156_0  | 8   | 0.8137 | 1          | 0.8137 | 0 | 0 | 0 | 1      | Ref |
| MH454077 | Unassigned | Unassigned | Unassigned | 708_0  | Clustered           | 47 VC_708_0  | 47  | 0.8654 | 1          | 0.8654 | 0 | 0 | 0 | 1      | Ref |
| MH454078 | Unassigned | Unassigned | Unassigned | 708_0  | Clustered           | 47 VC_708_0  | 47  | 0.8654 | 1          | 0.8654 | 0 | 0 | 0 | 1      | Ref |
| MH454079 | Unassigned | Unassigned | Unassigned | 708_0  | Clustered           | 47 VC_708_0  | 47  | 0.8654 | 1          | 0.8654 | 0 | 0 | 0 | 1      | Ref |
| MH454080 | Unassigned | Unassigned | Unassigned | 1156_0 | Clustered           | 8 VC_1156_0  | 8   | 0.8137 | 1          | 0.8137 | 0 | 0 | 0 | 1      | Ref |
| MH454082 | Unassigned | Unassigned | Unassigned | 708_0  | Clustered           | 47 VC_708_0  | 47  | 0.8654 | 1          | 0.8654 | 0 | 0 | 0 | 1      | Ref |
| MH454083 | Unassigned | Unassigned | Unassigned | 708_0  | Clustered           | 47 VC_708_0  | 47  | 0.8654 | 1          | 0.8654 | 0 | 0 | 0 | 1      | Ref |
| MH454084 | Unassigned | Unassigned | Unassigned | 708_0  | Clustered           | 47 VC_708_0  | 47  | 0.8654 | 1          | 0.8654 | 0 | 0 | 0 | 1      | Ref |
| MH460459 | Unassigned | Unassigned | Unassigned | 393_0  | Clustered           | 7 VC_393_0   | 7   | 0.1775 | 1          | 0.1775 | 0 | 0 | 0 | 1      | Ref |
| MH460460 | Unassigned | Unassigned | Unassigned | 67_4   | Clustered           | 4 VC_67_4    | 4   | 0.0431 | 0.90943035 | 0.0392 | 0 | 0 | 0 | 1      | Ref |
| MH460461 | Unassigned | Unassigned | Unassigned | 67_4   | Clustered           | 4 VC_67_4    | 4   | 0.0431 | 0.90943035 | 0.0392 | 0 | 0 | 0 | 1      | Ref |
| MH460462 | Unassigned | Unassigned | Unassigned | 67_4   | Clustered           | 4 VC_67_4    | 4   | 0.0431 | 0.90943035 | 0.0392 | 0 | 0 | 0 | 1      | Ref |
| MH460463 | Unassigned | Unassigned | Unassigned | 67_3   | Clustered           | 20 VC_67_3   | 20  | 0.3542 | 1          | 0.3542 | 0 | 0 | 0 | 1      | Ref |
| MH460824 | Unassigned | Unassigned | Unassigned | 1156_0 | Clustered           | 8 VC_1156_0  | 8   | 0.8137 | 1          | 0.8137 | 0 | 0 | 0 | 1      | Ref |
| MH460825 | Unassigned | Unassigned | Unassigned | 1156_0 | Clustered           | 8 VC_1156_0  | 8   | 0.8137 | 1          | 0.8137 | 0 | 0 | 0 | 1      | Ref |
| MH460826 | Unassigned | Unassigned | Unassigned | 1156_0 | Clustered           | 8 VC_1156_0  | 8   | 0.8137 | 1          | 0.8137 | 0 | 0 | 0 | 1      | Ref |
| MH460827 | Unassigned | Unassigned | Unassigned | 1156_0 | Clustered           | 8 VC_1156_0  | 8   | 0.8137 | 1          | 0.8137 | 0 | 0 | 0 | 1      | Ref |
| MH460829 | Unassigned | Unassigned | Unassigned | 492_1  | Clustered           | 20 VC_492_1  | 20  | 0.4176 | 1          | 0.4176 | 0 | 0 | 0 | 1      | Ref |
| MH464253 | Unassigned | Unassigned | Unassigned | 451_0  | Clustered           | 80 VC_451_0  | 80  | 0.9991 | 1          | 0.9991 | 0 | 0 | 0 | 1      | Ref |
| MH479909 | Unassigned | Unassigned | Unassigned | 517_1  | Clustered           | 108 VC_517_1 | 108 | 0.8483 | 1          | 0.8483 | 0 | 0 | 0 | 0.9955 | Ref |
| MH479910 | Unassigned | Unassigned | Unassigned | 1178_0 | Clustered           | 24 VC_1178_0 | 24  | 0.9524 | 1          | 0.9524 | 0 | 0 | 0 | 1      | Ref |
| MH479911 | Unassigned | Unassigned | Unassigned | 517_1  | Clustered           | 108 VC_517_1 | 108 | 0.8483 | 1          | 0.8483 | 0 | 0 | 0 | 0.9955 | Ref |
| MH479912 | Unassigned | Unassigned | Unassigned | 525_0  | Clustered           | 25 VC_525_0  | 25  | 0.4597 | 1          | 0.4597 | 0 | 0 | 0 | 1      | Ref |
| MH479913 | Unassigned | Unassigned | Unassigned | 1183_0 | Clustered           | 6 VC_1183_0  | 6   | 0.995  | 0.99996974 | 0.995  | 0 | 0 | 0 | 1      | Ref |
| MH479914 | Unassigned | Unassigned | Unassigned | 371_16 | Clustered           | 42 VC_371_16 | 42  | 0.1341 | 1          | 0.1341 | 0 | 0 | 0 | 0.7282 | Ref |
| MH479915 | Unassigned | Unassigned | Unassigned | 1177_0 | Clustered           | 14 VC_1177_0 | 14  | 0.7847 | 1          | 0.7847 | 0 | 0 | 0 | 0.989  | Ref |
| MH479916 | Unassigned | Unassigned | Unassigned | 371_13 | Clustered           | 33 VC_371_13 | 33  | 0.179  | 1          | 0.179  | 0 | 0 | 0 | 0.8769 | Ref |
| MH479917 | Unassigned | Unassigned | Unassigned | 1178_0 | Clustered           | 24 VC_1178_0 | 24  | 0.9524 | 1          | 0.9524 | 0 | 0 | 0 | 1      | Ref |
| MH479918 | Unassigned | Unassigned | Unassigned | 371_13 | Clustered           | 33 VC_371_13 | 33  | 0.179  | 1          | 0.179  | 0 | 0 | 0 | 0.8769 | Ref |
| MH479919 | Unassigned | Unassigned | Unassigned | 325_61 | Clustered           | 8 VC_325_61  | 8   | 0.0395 | 1          | 0.0395 | 0 | 0 | 0 | 0.7857 | Ref |
| MH479920 | Unassigned | Unassigned | Unassigned | 761_0  | Clustered           | 67 VC_761_0  | 67  | 0.8947 | 1          | 0.8947 | 0 | 0 | 0 | 1      | Ref |
| MH479921 | Unassigned | Unassigned | Unassigned | 371_16 | Clustered           | 42 VC_371_16 | 42  | 0.1341 | 1          | 0.1341 | 0 | 0 | 0 | 0.7282 | Ref |
| MH479923 | Unassigned | Unassigned | Unassigned | 870_0  | Clustered           | 5 VC_870_0   | 5   | 0.424  | 0.99999997 | 0.424  | 0 | 0 | 0 | 1      | Ref |
| MH479924 | Unassigned | Unassigned | Unassigned | 1093_0 | Clustered           | 40 VC_1093_0 | 40  | 0.8754 | 1          | 0.8754 | 0 | 0 | 0 | 1      | Ref |
| MH479925 | Unassigned | Unassigned | Unassigned | 1183_0 | Clustered           | 6 VC_1183_0  | 6   | 0.995  | 0.99996974 | 0.995  | 0 | 0 | 0 | 1      | Ref |
| MH479926 | Unassigned | Unassigned | Unassigned | 1164_0 | Clustered           | 25 VC_1164_0 | 25  | 0.7312 | 1          | 0.7312 | 0 | 0 | 0 | 1      | Ref |



|          |            |            |            |        |                     |              |     |        |            |        |   |   |   |            |
|----------|------------|------------|------------|--------|---------------------|--------------|-----|--------|------------|--------|---|---|---|------------|
| MH479927 | Unassigned | Unassigned | Unassigned | 525_0  | Clustered           | 25 VC_525_0  | 25  | 0.4597 | 1          | 0.4597 | 0 | 0 | 0 | 1 Ref      |
| MH487649 | Unassigned | Unassigned | Unassigned | 187_1  | Clustered           | 7 VC_187_1   | 7   | 0.1423 | 1          | 0.1423 | 0 | 0 | 0 | 1 Ref      |
| MH491167 | Unassigned | Unassigned | Unassigned | 451_0  | Clustered           | 80 VC_451_0  | 80  | 0.9991 | 1          | 0.9991 | 0 | 0 | 0 | 1 Ref      |
| MH491968 | Unassigned | Unassigned | Unassigned | 584_0  | Clustered           | 28 VC_584_0  | 28  | 0.7704 | 1          | 0.7704 | 0 | 0 | 0 | 1 Ref      |
| MH491969 | Unassigned | Unassigned | Unassigned | 772_11 | Clustered           | 6 VC_772_11  | 6   | 0.0305 | 0.84253803 | 0.0257 | 0 | 0 | 0 | 0.8 Ref    |
| MH494197 | Unassigned | Unassigned | Unassigned | 164_2  | Clustered/Singleton | 1 VC_164_2   | 1   | 0      | 1          | 0      | 0 | 0 | 0 | 1 Ref      |
| MH509443 | Unassigned | Unassigned | Unassigned | 517_1  | Clustered           | 108 VC_517_1 | 108 | 0.8483 | 1          | 0.8483 | 0 | 0 | 0 | 0.9955 Ref |
| MH509444 | Unassigned | Unassigned | Unassigned | 236_0  | Clustered           | 72 VC_236_0  | 72  | 0.8104 | 1          | 0.8104 | 0 | 0 | 0 | 1 Ref      |
| MH509445 | Unassigned | Unassigned | Unassigned | 567_0  | Clustered           | 8 VC_567_0   | 8   | 0.4935 | 1          | 0.4935 | 0 | 0 | 0 | 1 Ref      |
| MH509446 | Unassigned | Unassigned | Unassigned | 954_0  | Clustered           | 13 VC_954_0  | 13  | 0.863  | 1          | 0.863  | 0 | 0 | 0 | 1 Ref      |
| MH509447 | Unassigned | Unassigned | Unassigned | 1234_0 | Clustered           | 44 VC_1234_0 | 44  | 1      | 1          | 1      | 0 | 0 | 0 | 1 Ref      |
| MH512890 | Unassigned | Unassigned | Unassigned | 655_0  | Clustered           | 2 VC_655_0   | 2   | 0.0111 | 0.95704495 | 0.0106 | 0 | 0 | 0 | 1 Ref      |
| MH513970 | Unassigned | Unassigned | Unassigned | 372_0  | Clustered           | 24 VC_372_0  | 24  | 0.5539 | 1          | 0.5539 | 0 | 0 | 0 | 1 Ref      |
| MH513971 | Unassigned | Unassigned | Unassigned | 325_0  | Clustered           | 2 VC_325_0   | 2   | 0.0041 | 0.95574439 | 0.0039 | 0 | 0 | 0 | 1 Ref      |
| MH513972 | Unassigned | Unassigned | Unassigned | 551_2  | Clustered           | 17 VC_551_2  | 17  | 0.0973 | 1          | 0.0973 | 0 | 0 | 0 | 0.9779 Ref |
| MH513973 | Unassigned | Unassigned | Unassigned | 371_13 | Clustered           | 33 VC_371_13 | 33  | 0.179  | 1          | 0.179  | 0 | 0 | 0 | 0.8769 Ref |
| MH513974 | Unassigned | Unassigned | Unassigned | 224_0  | Clustered           | 19 VC_224_0  | 19  | 0.9416 | 1          | 0.9416 | 0 | 0 | 0 | 1 Ref      |
| MH513975 | Unassigned | Unassigned | Unassigned | 514_0  | Clustered           | 75 VC_514_0  | 75  | 0.9402 | 1          | 0.9402 | 0 | 0 | 0 | 1 Ref      |
| MH513976 | Unassigned | Unassigned | Unassigned | 509_0  | Clustered           | 37 VC_509_0  | 37  | 0.9689 | 1          | 0.9689 | 0 | 0 | 0 | 1 Ref      |
| MH513977 | Unassigned | Unassigned | Unassigned | 236_0  | Clustered           | 72 VC_236_0  | 72  | 0.8104 | 1          | 0.8104 | 0 | 0 | 0 | 1 Ref      |
| MH513978 | Unassigned | Unassigned | Unassigned | 551_2  | Clustered           | 17 VC_551_2  | 17  | 0.0973 | 1          | 0.0973 | 0 | 0 | 0 | 0.9779 Ref |
| MH513979 | Unassigned | Unassigned | Unassigned | 685_0  | Clustered           | 16 VC_685_0  | 16  | 0.2972 | 1          | 0.2972 | 0 | 0 | 0 | 0.9167 Ref |
| MH513980 | Unassigned | Unassigned | Unassigned | 371_11 | Clustered           | 31 VC_371_11 | 31  | 0.0927 | 1          | 0.0927 | 0 | 0 | 0 | 0.7011 Ref |
| MH513981 | Unassigned | Unassigned | Unassigned | 1240_0 | Clustered           | 82 VC_1240_0 | 82  | 0.7945 | 1          | 0.7945 | 0 | 0 | 0 | 1 Ref      |
| MH513982 | Unassigned | Unassigned | Unassigned | 1163_0 | Clustered           | 28 VC_1163_0 | 28  | 0.4923 | 1          | 0.4923 | 0 | 0 | 0 | 1 Ref      |
| MH513983 | Unassigned | Unassigned | Unassigned | 551_6  | Clustered           | 22 VC_551_6  | 22  | 0.1214 | 1          | 0.1214 | 0 | 0 | 0 | 0.8095 Ref |
| MH513984 | Unassigned | Unassigned | Unassigned | 222_0  | Clustered           | 5 VC_222_0   | 5   | 0.0565 | 0.99999997 | 0.0565 | 0 | 0 | 0 | 1 Ref      |
| MH513985 | Unassigned | Unassigned | Unassigned | 215_1  | Clustered           | 19 VC_215_1  | 19  | 0.4188 | 1          | 0.4188 | 0 | 0 | 0 | 1 Ref      |
| MH523359 | Unassigned | Unassigned | Unassigned | 133_40 | Clustered/Singleton | 1 VC_133_40  | 1   | 0      | 1          | 0      | 0 | 0 | 0 | 1 Ref      |
| MH533020 | Unassigned | Unassigned | Unassigned | 849_0  | Clustered           | 3 VC_849_0   | 3   | 0.069  | 0.9984794  | 0.0689 | 0 | 0 | 0 | 1 Ref      |
| MH536736 | Unassigned | Unassigned | Unassigned | 80_0   | Clustered           | 41 VC_80_0   | 41  | 0.5837 | 1          | 0.5837 | 0 | 0 | 0 | 0.9805 Ref |
| MH536811 | Unassigned | Unassigned | Unassigned | 1072_4 | Clustered           | 4 VC_1072_4  | 4   | 0.0736 | 0.99956559 | 0.0736 | 0 | 0 | 0 | 1 Ref      |
| MH536812 | Unassigned | Unassigned | Unassigned | 557_2  | Clustered/Singleton | 1 VC_557_2   | 1   | 0      | 1          | 0      | 0 | 0 | 0 | 1 Ref      |
| MH536813 | Unassigned | Unassigned | Unassigned | 514_0  | Clustered           | 75 VC_514_0  | 75  | 0.9402 | 1          | 0.9402 | 0 | 0 | 0 | 1 Ref      |
| MH536814 | Unassigned | Unassigned | Unassigned | 1072_4 | Clustered           | 4 VC_1072_4  | 4   | 0.0736 | 0.99956559 | 0.0736 | 0 | 0 | 0 | 1 Ref      |
| MH536815 | Unassigned | Unassigned | Unassigned | 1353_0 | Clustered           | 10 VC_1353_0 | 10  | 1      | 1          | 1      | 0 | 0 | 0 | 1 Ref      |
| MH536816 | Unassigned | Unassigned | Unassigned | 325_27 | Clustered           | 2 VC_325_27  | 2   | 0.0044 | 0.95750955 | 0.0042 | 0 | 0 | 0 | 1 Ref      |
| MH536817 | Unassigned | Unassigned | Unassigned | 517_1  | Clustered           | 108 VC_517_1 | 108 | 0.8483 | 1          | 0.8483 | 0 | 0 | 0 | 0.9955 Ref |
| MH536818 | Unassigned | Unassigned | Unassigned | 1176_0 | Clustered           | 41 VC_1176_0 | 41  | 0.9558 | 1          | 0.9558 | 0 | 0 | 0 | 0.9976 Ref |
| MH536819 | Unassigned | Unassigned | Unassigned | 767_0  | Clustered           | 34 VC_767_0  | 34  | 0.9173 | 1          | 0.9173 | 0 | 0 | 0 | 1 Ref      |
| MH536820 | Unassigned | Unassigned | Unassigned | 551_0  | Clustered           | 16 VC_551_0  | 16  | 0.0915 | 1          | 0.0915 | 0 | 0 | 0 | 0.6667 Ref |
| MH536821 | Unassigned | Unassigned | Unassigned | 236_0  | Clustered           | 72 VC_236_0  | 72  | 0.8104 | 1          | 0.8104 | 0 | 0 | 0 | 1 Ref      |
| MH536822 | Unassigned | Unassigned | Unassigned | 236_0  | Clustered           | 72 VC_236_0  | 72  | 0.8104 | 1          | 0.8104 | 0 | 0 | 0 | 1 Ref      |
| MH536823 | Unassigned | Unassigned | Unassigned | 856_0  | Clustered           | 7 VC_856_0   | 7   | 0.3463 | 1          | 0.3463 | 0 | 0 | 0 | 1 Ref      |
| MH536824 | Unassigned | Unassigned | Unassigned | 767_0  | Clustered           | 34 VC_767_0  | 34  | 0.9173 | 1          | 0.9173 | 0 | 0 | 0 | 1 Ref      |
| MH536825 | Unassigned | Unassigned | Unassigned | 514_0  | Clustered           | 75 VC_514_0  | 75  | 0.9402 | 1          | 0.9402 | 0 | 0 | 0 | 1 Ref      |
| MH536827 | Unassigned | Unassigned | Unassigned | 551_7  | Clustered           | 28 VC_551_7  | 28  | 0.1661 | 1          | 0.1661 | 0 | 0 | 0 | 0.8519 Ref |
| MH536828 | Unassigned | Unassigned | Unassigned | 221_0  | Clustered           | 22 VC_221_0  | 22  | 0.7447 | 1          | 0.7447 | 0 | 0 | 0 | 1 Ref      |
| MH536829 | Unassigned | Unassigned | Unassigned | 551_6  | Clustered           | 22 VC_551_6  | 22  | 0.1214 | 1          | 0.1214 | 0 | 0 | 0 | 0.8095 Ref |
| MH538193 | Unassigned | Unassigned | Unassigned | 884_0  | Clustered           | 28 VC_884_0  | 28  | 0.6211 | 1          | 0.6211 | 0 | 0 | 0 | 0.9841 Ref |
| MH540083 | Unassigned | Unassigned | Unassigned | 340_0  | Clustered           | 31 VC_340_0  | 31  | 0.9549 | 1          | 0.9549 | 0 | 0 | 0 | 1 Ref      |
| MH542234 | Unassigned | Unassigned | Unassigned | 150_0  | Clustered           | 13 VC_150_0  | 13  | 0.2417 | 1          | 0.2417 | 0 | 0 | 0 | 0.9872 Ref |
| MH547045 | Unassigned | Unassigned | Unassigned | 43_0   | Clustered           | 38 VC_43_0   | 38  | 0.5885 | 1          | 0.5885 | 0 | 0 | 0 | 0.9659 Ref |
| MH550421 | Unassigned | Unassigned | Unassigned | 283_88 | Clustered           | 2 VC_283_88  | 2   | 0.0026 | 0.95596547 | 0.0024 | 0 | 0 | 0 | 1 Ref      |
| MH552500 | Unassigned | Unassigned | Unassigned | 673_0  | Clustered           | 15 VC_673_0  | 15  | 0.8234 | 1          | 0.8234 | 0 | 0 | 0 | 0.7619 Ref |
| MH553563 | Unassigned | Unassigned | Unassigned | 283_52 | Clustered/Singleton | 1 VC_283_52  | 1   | 0      | 1          | 0      | 0 | 0 | 0 | 1 Ref      |
| MH560358 | Unassigned | Unassigned | Unassigned | 590_0  | Clustered           | 27 VC_590_0  | 27  | 0.9947 | 1          | 0.9947 | 0 | 0 | 0 | 1 Ref      |
| MH571750 | Unassigned | Unassigned | Unassigned | 329_7  | Clustered           | 18 VC_329_7  | 18  | 0.0938 | 1          | 0.0938 | 0 | 0 | 0 | 0.7778 Ref |
| MH572269 | Unassigned | Unassigned | Unassigned | 398_0  | Clustered           | 48 VC_398_0  | 48  | 0.4813 | 1          | 0.4813 | 0 | 0 | 0 | 1 Ref      |
| MH572274 | Unassigned | Unassigned | Unassigned | 1355_0 | Clustered           | 3 VC_1355_0  | 3   | 1      | 1          | 1      | 0 | 0 | 0 | 1 Ref      |
| MH572275 | Unassigned | Unassigned | Unassigned | 1355_0 | Clustered           | 3 VC_1355_0  | 3   | 1      | 1          | 1      | 0 | 0 | 0 | 1 Ref      |
| MH572276 | Unassigned | Unassigned | Unassigned | 1355_0 | Clustered           | 3 VC_1355_0  | 3   | 1      | 1          | 1      | 0 | 0 | 0 | 1 Ref      |
| MH572277 | Unassigned | Unassigned | Unassigned | 198_0  | Clustered           | 28 VC_198_0  | 28  | 0.2429 | 0.99971175 | 0.2429 | 0 | 0 | 0 | 1 Ref      |
| MH572279 | Unassigned | Unassigned | Unassigned | 404_0  | Clustered           | 25 VC_404_0  | 25  | 0.5649 | 1          | 0.5649 | 0 | 0 | 0 | 1 Ref      |
| MH572280 | Unassigned | Unassigned | Unassigned | 198_0  | Clustered           | 28 VC_198_0  | 28  | 0.2429 | 0.99971175 | 0.2429 | 0 | 0 | 0 | 1 Ref      |
| MH572282 | Unassigned | Unassigned | Unassigned | 198_0  | Clustered           | 28 VC_198_0  | 28  | 0.2429 | 0.99971175 | 0.2429 | 0 | 0 | 0 | 1 Ref      |
| MH572283 | Unassigned | Unassigned | Unassigned | 995_0  | Clustered           | 69 VC_995_0  | 69  | 0.8547 | 1          | 0.8547 | 0 | 0 | 0 | 1 Ref      |
| MH572284 | Unassigned | Unassigned | Unassigned | 995_0  | Clustered           | 69 VC_995_0  | 69  | 0.8547 | 1          | 0.8547 | 0 | 0 | 0 | 1 Ref      |
| MH572285 | Unassigned | Unassigned | Unassigned | 995_0  | Clustered           | 69 VC_995_0  | 69  | 0.8547 | 1          | 0.8547 | 0 | 0 | 0 | 1 Ref      |
| MH572286 | Unassigned | Unassigned | Unassigned | 995_0  | Clustered           | 69 VC_995_0  | 69  | 0.8547 | 1          | 0.8547 | 0 | 0 | 0 | 1 Ref      |
| MH572287 | Unassigned | Unassigned | Unassigned | 1084_0 | Clustered           | 9 VC_1084_0  | 9   | 0.6558 | 1          | 0.6558 | 0 | 0 | 0 | 1 Ref      |
| MH572288 | Unassigned | Unassigned | Unassigned | 1084_0 | Clustered           | 9 VC_1084_0  | 9   | 0.6558 | 1          | 0.6558 | 0 | 0 | 0 | 1 Ref      |
| MH572290 | Unassigned | Unassigned | Unassigned | 198_0  | Clustered           | 28 VC_198_0  | 28  | 0.2429 | 0.99971175 | 0.2429 | 0 | 0 | 0 | 1 Ref      |
| MH572291 | Unassigned | Unassigned | Unassigned | 995_0  | Clustered           | 69 VC_995_0  | 69  | 0.8547 | 1          | 0.8547 | 0 | 0 | 0 | 1 Ref      |
| MH572292 | Unassigned | Unassigned | Unassigned | 995_0  | Clustered           | 69 VC_995_0  | 69  | 0.8547 | 1          | 0.8547 | 0 | 0 | 0 | 1 Ref      |
| MH572293 | Unassigned | Unassigned | Unassigned | 995_0  | Clustered           | 69 VC_995_0  | 69  | 0.8547 | 1          | 0.8547 | 0 | 0 | 0 | 1 Ref      |
| MH572294 | Unassigned | Unassigned | Unassigned | 403_0  | Clustered           | 20 VC_403_0  | 20  | 0.6598 | 1          | 0.6598 | 0 | 0 | 0 | 1 Ref      |
| MH572295 | Unassigned | Unassigned | Unassigned | 403_0  | Clustered           | 20 VC_403_0  | 20  | 0.6598 | 1          | 0.6598 | 0 | 0 | 0 | 1 Ref      |
| MH572296 | Unassigned | Unassigned | Unassigned | 403_0  | Clustered           | 20 VC_403_0  | 20  | 0.6598 | 1          | 0.6598 | 0 | 0 | 0 | 1 Ref      |
| MH572299 | Unassigned | Unassigned | Unassigned | 998_0  | Clustered           | 2 VC_998_0   | 2   | 0.0515 | 0.93901809 | 0.0484 | 0 | 0 | 0 | 1 Ref      |
| MH572300 | Unassigned | Unassigned | Unassigned | 404_0  | Clustered           | 25 VC_404_0  | 25  | 0.5649 | 1          | 0.5649 | 0 | 0 | 0 | 1 Ref      |



[illegible]



|          |            |            |            |        |                     |              |    |        |            |        |   |   |   |       |
|----------|------------|------------|------------|--------|---------------------|--------------|----|--------|------------|--------|---|---|---|-------|
| MH572406 | Unassigned | Unassigned | Unassigned | 404_0  | Clustered           | 25 VC_404_0  | 25 | 0.5649 | 1          | 0.5649 | 0 | 0 | 0 | 1 Ref |
| MH572407 | Unassigned | Unassigned | Unassigned | 1356_0 | Clustered           | 8 VC_1356_0  | 8  | 0.8729 | 0.99998222 | 0.8729 | 0 | 0 | 0 | 1 Ref |
| MH572408 | Unassigned | Unassigned | Unassigned | 1356_0 | Clustered           | 8 VC_1356_0  | 8  | 0.8729 | 0.99998222 | 0.8729 | 0 | 0 | 0 | 1 Ref |
| MH572409 | Unassigned | Unassigned | Unassigned | 1079_0 | Clustered           | 6 VC_1079_0  | 6  | 0.9301 | 0.89096579 | 0.8287 | 0 | 0 | 0 | 1 Ref |
| MH572410 | Unassigned | Unassigned | Unassigned | 1077_0 | Clustered           | 48 VC_1077_0 | 48 | 0.8525 | 1          | 0.8525 | 0 | 0 | 0 | 1 Ref |
| MH572411 | Unassigned | Unassigned | Unassigned | 1077_0 | Clustered           | 48 VC_1077_0 | 48 | 0.8525 | 1          | 0.8525 | 0 | 0 | 0 | 1 Ref |
| MH572412 | Unassigned | Unassigned | Unassigned | 1077_0 | Clustered           | 48 VC_1077_0 | 48 | 0.8525 | 1          | 0.8525 | 0 | 0 | 0 | 1 Ref |
| MH572414 | Unassigned | Unassigned | Unassigned | 1323_0 | Clustered           | 6 VC_1323_0  | 6  | 0.598  | 0.99460389 | 0.5948 | 0 | 0 | 0 | 1 Ref |
| MH572418 | Unassigned | Unassigned | Unassigned | 992_0  | Clustered           | 8 VC_992_0   | 8  | 0.3873 | 1          | 0.3873 | 0 | 0 | 0 | 1 Ref |
| MH572419 | Unassigned | Unassigned | Unassigned | 398_0  | Clustered           | 48 VC_398_0  | 48 | 0.4813 | 1          | 0.4813 | 0 | 0 | 0 | 1 Ref |
| MH572422 | Unassigned | Unassigned | Unassigned | 198_0  | Clustered           | 28 VC_198_0  | 28 | 0.2429 | 0.99971175 | 0.2429 | 0 | 0 | 0 | 1 Ref |
| MH572423 | Unassigned | Unassigned | Unassigned | 995_0  | Clustered           | 69 VC_995_0  | 69 | 0.8547 | 1          | 0.8547 | 0 | 0 | 0 | 1 Ref |
| MH572424 | Unassigned | Unassigned | Unassigned | 995_0  | Clustered           | 69 VC_995_0  | 69 | 0.8547 | 1          | 0.8547 | 0 | 0 | 0 | 1 Ref |
| MH572425 | Unassigned | Unassigned | Unassigned | 998_0  | Clustered           | 2 VC_998_0   | 2  | 0.0515 | 0.93901809 | 0.0484 | 0 | 0 | 0 | 1 Ref |
| MH572426 | Unassigned | Unassigned | Unassigned | 999_0  | Clustered           | 2 VC_999_0   | 2  | 0.0273 | 0.73989325 | 0.0202 | 0 | 0 | 0 | 1 Ref |
| MH572427 | Unassigned | Unassigned | Unassigned | 995_0  | Clustered           | 69 VC_995_0  | 69 | 0.8547 | 1          | 0.8547 | 0 | 0 | 0 | 1 Ref |
| MH572428 | Unassigned | Unassigned | Unassigned | 995_0  | Clustered           | 69 VC_995_0  | 69 | 0.8547 | 1          | 0.8547 | 0 | 0 | 0 | 1 Ref |
| MH572430 | Unassigned | Unassigned | Unassigned | 403_0  | Clustered           | 20 VC_403_0  | 20 | 0.6598 | 1          | 0.6598 | 0 | 0 | 0 | 1 Ref |
| MH572431 | Unassigned | Unassigned | Unassigned | 398_0  | Clustered           | 48 VC_398_0  | 48 | 0.4813 | 1          | 0.4813 | 0 | 0 | 0 | 1 Ref |
| MH572434 | Unassigned | Unassigned | Unassigned | 201_0  | Clustered           | 3 VC_201_0   | 3  | 0.0998 | 0.69690761 | 0.0695 | 0 | 0 | 0 | 1 Ref |
| MH572435 | Unassigned | Unassigned | Unassigned | 404_0  | Clustered           | 25 VC_404_0  | 25 | 0.5649 | 1          | 0.5649 | 0 | 0 | 0 | 1 Ref |
| MH572436 | Unassigned | Unassigned | Unassigned | 404_0  | Clustered           | 25 VC_404_0  | 25 | 0.5649 | 1          | 0.5649 | 0 | 0 | 0 | 1 Ref |
| MH572437 | Unassigned | Unassigned | Unassigned | 404_0  | Clustered           | 25 VC_404_0  | 25 | 0.5649 | 1          | 0.5649 | 0 | 0 | 0 | 1 Ref |
| MH572438 | Unassigned | Unassigned | Unassigned | 198_0  | Clustered           | 28 VC_198_0  | 28 | 0.2429 | 0.99971175 | 0.2429 | 0 | 0 | 0 | 1 Ref |
| MH572439 | Unassigned | Unassigned | Unassigned | 398_0  | Clustered           | 48 VC_398_0  | 48 | 0.4813 | 1          | 0.4813 | 0 | 0 | 0 | 1 Ref |
| MH572441 | Unassigned | Unassigned | Unassigned | 398_0  | Clustered           | 48 VC_398_0  | 48 | 0.4813 | 1          | 0.4813 | 0 | 0 | 0 | 1 Ref |
| MH572443 | Unassigned | Unassigned | Unassigned | 398_0  | Clustered           | 48 VC_398_0  | 48 | 0.4813 | 1          | 0.4813 | 0 | 0 | 0 | 1 Ref |
| MH572444 | Unassigned | Unassigned | Unassigned | 198_0  | Clustered           | 28 VC_198_0  | 28 | 0.2429 | 0.99971175 | 0.2429 | 0 | 0 | 0 | 1 Ref |
| MH572445 | Unassigned | Unassigned | Unassigned | 398_0  | Clustered           | 48 VC_398_0  | 48 | 0.4813 | 1          | 0.4813 | 0 | 0 | 0 | 1 Ref |
| MH572446 | Unassigned | Unassigned | Unassigned | 398_0  | Clustered           | 48 VC_398_0  | 48 | 0.4813 | 1          | 0.4813 | 0 | 0 | 0 | 1 Ref |
| MH572448 | Unassigned | Unassigned | Unassigned | 198_0  | Clustered           | 28 VC_198_0  | 28 | 0.2429 | 0.99971175 | 0.2429 | 0 | 0 | 0 | 1 Ref |
| MH572451 | Unassigned | Unassigned | Unassigned | 398_0  | Clustered           | 48 VC_398_0  | 48 | 0.4813 | 1          | 0.4813 | 0 | 0 | 0 | 1 Ref |
| MH572452 | Unassigned | Unassigned | Unassigned | 198_0  | Clustered           | 28 VC_198_0  | 28 | 0.2429 | 0.99971175 | 0.2429 | 0 | 0 | 0 | 1 Ref |
| MH572453 | Unassigned | Unassigned | Unassigned | 199_0  | Clustered           | 12 VC_199_0  | 12 | 0.448  | 1          | 0.448  | 0 | 0 | 0 | 1 Ref |
| MH572454 | Unassigned | Unassigned | Unassigned | 198_0  | Clustered           | 28 VC_198_0  | 28 | 0.2429 | 0.99971175 | 0.2429 | 0 | 0 | 0 | 1 Ref |
| MH572455 | Unassigned | Unassigned | Unassigned | 992_0  | Clustered           | 8 VC_992_0   | 8  | 0.3873 | 1          | 0.3873 | 0 | 0 | 0 | 1 Ref |
| MH572457 | Unassigned | Unassigned | Unassigned | 1079_0 | Clustered           | 6 VC_1079_0  | 6  | 0.9301 | 0.89096579 | 0.8287 | 0 | 0 | 0 | 1 Ref |
| MH572458 | Unassigned | Unassigned | Unassigned | 1088_0 | Clustered           | 3 VC_1088_0  | 3  | 0.7739 | 0.82711071 | 0.6401 | 0 | 0 | 0 | 1 Ref |
| MH572459 | Unassigned | Unassigned | Unassigned | 1062_0 | Clustered           | 45 VC_1062_0 | 45 | 0.9734 | 0.50949847 | 0.4959 | 0 | 0 | 0 | 1 Ref |
| MH572460 | Unassigned | Unassigned | Unassigned | 1062_0 | Clustered           | 45 VC_1062_0 | 45 | 0.9734 | 0.50949847 | 0.4959 | 0 | 0 | 0 | 1 Ref |
| MH572461 | Unassigned | Unassigned | Unassigned | 1062_0 | Clustered           | 45 VC_1062_0 | 45 | 0.9734 | 0.50949847 | 0.4959 | 0 | 0 | 0 | 1 Ref |
| MH572462 | Unassigned | Unassigned | Unassigned | 1062_0 | Clustered           | 45 VC_1062_0 | 45 | 0.9734 | 0.50949847 | 0.4959 | 0 | 0 | 0 | 1 Ref |
| MH572463 | Unassigned | Unassigned | Unassigned | 1062_0 | Clustered           | 45 VC_1062_0 | 45 | 0.9734 | 0.50949847 | 0.4959 | 0 | 0 | 0 | 1 Ref |
| MH572465 | Unassigned | Unassigned | Unassigned | 1062_0 | Clustered           | 45 VC_1062_0 | 45 | 0.9734 | 0.50949847 | 0.4959 | 0 | 0 | 0 | 1 Ref |
| MH572466 | Unassigned | Unassigned | Unassigned | 995_0  | Clustered           | 69 VC_995_0  | 69 | 0.8547 | 1          | 0.8547 | 0 | 0 | 0 | 1 Ref |
| MH572467 | Unassigned | Unassigned | Unassigned | 1084_0 | Clustered           | 9 VC_1084_0  | 9  | 0.6558 | 1          | 0.6558 | 0 | 0 | 0 | 1 Ref |
| MH572468 | Unassigned | Unassigned | Unassigned | 1084_0 | Clustered           | 9 VC_1084_0  | 9  | 0.6558 | 1          | 0.6558 | 0 | 0 | 0 | 1 Ref |
| MH572469 | Unassigned | Unassigned | Unassigned | 404_0  | Clustered           | 25 VC_404_0  | 25 | 0.5649 | 1          | 0.5649 | 0 | 0 | 0 | 1 Ref |
| MH572470 | Unassigned | Unassigned | Unassigned | 403_0  | Clustered           | 20 VC_403_0  | 20 | 0.6598 | 1          | 0.6598 | 0 | 0 | 0 | 1 Ref |
| MH572471 | Unassigned | Unassigned | Unassigned | 403_0  | Clustered           | 20 VC_403_0  | 20 | 0.6598 | 1          | 0.6598 | 0 | 0 | 0 | 1 Ref |
| MH572472 | Unassigned | Unassigned | Unassigned | 403_0  | Clustered           | 20 VC_403_0  | 20 | 0.6598 | 1          | 0.6598 | 0 | 0 | 0 | 1 Ref |
| MH572473 | Unassigned | Unassigned | Unassigned | 398_0  | Clustered           | 48 VC_398_0  | 48 | 0.4813 | 1          | 0.4813 | 0 | 0 | 0 | 1 Ref |
| MH572475 | Unassigned | Unassigned | Unassigned | 201_0  | Clustered           | 3 VC_201_0   | 3  | 0.0998 | 0.69690761 | 0.0695 | 0 | 0 | 0 | 1 Ref |
| MH572479 | Unassigned | Unassigned | Unassigned | 401_0  | Clustered/Singleton | 1 VC_401_0   | 1  | 0      | 1          | 0      | 0 | 0 | 0 | 1 Ref |
| MH572480 | Unassigned | Unassigned | Unassigned | 404_0  | Clustered           | 25 VC_404_0  | 25 | 0.5649 | 1          | 0.5649 | 0 | 0 | 0 | 1 Ref |
| MH572482 | Unassigned | Unassigned | Unassigned | 1079_0 | Clustered           | 6 VC_1079_0  | 6  | 0.9301 | 0.89096579 | 0.8287 | 0 | 0 | 0 | 1 Ref |
| MH572483 | Unassigned | Unassigned | Unassigned | 1079_0 | Clustered           | 6 VC_1079_0  | 6  | 0.9301 | 0.89096579 | 0.8287 | 0 | 0 | 0 | 1 Ref |
| MH572484 | Unassigned | Unassigned | Unassigned | 1338_0 | Clustered           | 4 VC_1338_0  | 4  | 1      | 1          | 1      | 0 | 0 | 0 | 1 Ref |
| MH572485 | Unassigned | Unassigned | Unassigned | 1323_0 | Clustered           | 6 VC_1323_0  | 6  | 0.598  | 0.99460389 | 0.5948 | 0 | 0 | 0 | 1 Ref |
| MH572486 | Unassigned | Unassigned | Unassigned | 1077_0 | Clustered           | 48 VC_1077_0 | 48 | 0.8525 | 1          | 0.8525 | 0 | 0 | 0 | 1 Ref |
| MH572487 | Unassigned | Unassigned | Unassigned | 398_0  | Clustered           | 48 VC_398_0  | 48 | 0.4813 | 1          | 0.4813 | 0 | 0 | 0 | 1 Ref |
| MH572489 | Unassigned | Unassigned | Unassigned | 1089_0 | Clustered           | 2 VC_1089_0  | 2  | 0.546  | 0.5        | 0.273  | 0 | 0 | 0 | 1 Ref |
| MH572490 | Unassigned | Unassigned | Unassigned | 1357_0 | Clustered           | 6 VC_1357_0  | 6  | 1      | 1          | 1      | 0 | 0 | 0 | 1 Ref |
| MH572491 | Unassigned | Unassigned | Unassigned | 1357_0 | Clustered           | 6 VC_1357_0  | 6  | 1      | 1          | 1      | 0 | 0 | 0 | 1 Ref |
| MH572492 | Unassigned | Unassigned | Unassigned | 398_0  | Clustered           | 48 VC_398_0  | 48 | 0.4813 | 1          | 0.4813 | 0 | 0 | 0 | 1 Ref |
| MH572493 | Unassigned | Unassigned | Unassigned | 398_0  | Clustered           | 48 VC_398_0  | 48 | 0.4813 | 1          | 0.4813 | 0 | 0 | 0 | 1 Ref |
| MH572494 | Unassigned | Unassigned | Unassigned | 398_0  | Clustered           | 48 VC_398_0  | 48 | 0.4813 | 1          | 0.4813 | 0 | 0 | 0 | 1 Ref |
| MH572495 | Unassigned | Unassigned | Unassigned | 995_0  | Clustered           | 69 VC_995_0  | 69 | 0.8547 | 1          | 0.8547 | 0 | 0 | 0 | 1 Ref |
| MH572496 | Unassigned | Unassigned | Unassigned | 1084_0 | Clustered           | 9 VC_1084_0  | 9  | 0.6558 | 1          | 0.6558 | 0 | 0 | 0 | 1 Ref |
| MH572497 | Unassigned | Unassigned | Unassigned | 1084_0 | Clustered           | 9 VC_1084_0  | 9  | 0.6558 | 1          | 0.6558 | 0 | 0 | 0 | 1 Ref |
| MH572498 | Unassigned | Unassigned | Unassigned | 1084_0 | Clustered           | 9 VC_1084_0  | 9  | 0.6558 | 1          | 0.6558 | 0 | 0 | 0 | 1 Ref |
| MH572499 | Unassigned | Unassigned | Unassigned | 1084_0 | Clustered           | 9 VC_1084_0  | 9  | 0.6558 | 1          | 0.6558 | 0 | 0 | 0 | 1 Ref |
| MH572500 | Unassigned | Unassigned | Unassigned | 1084_0 | Clustered           | 9 VC_1084_0  | 9  | 0.6558 | 1          | 0.6558 | 0 | 0 | 0 | 1 Ref |
| MH572503 | Unassigned | Unassigned | Unassigned | 398_0  | Clustered           | 48 VC_398_0  | 48 | 0.4813 | 1          | 0.4813 | 0 | 0 | 0 | 1 Ref |
| MH572504 | Unassigned | Unassigned | Unassigned | 995_0  | Clustered           | 69 VC_995_0  | 69 | 0.8547 | 1          | 0.8547 | 0 | 0 | 0 | 1 Ref |
| MH572505 | Unassigned | Unassigned | Unassigned | 403_0  | Clustered           | 20 VC_403_0  | 20 | 0.6598 | 1          | 0.6598 | 0 | 0 | 0 | 1 Ref |
| MH572506 | Unassigned | Unassigned | Unassigned | 403_0  | Clustered           | 20 VC_403_0  | 20 | 0.6598 | 1          | 0.6598 | 0 | 0 | 0 | 1 Ref |
| MH572507 | Unassigned | Unassigned | Unassigned | 403_0  | Clustered           | 20 VC_403_0  | 20 | 0.6598 | 1          | 0.6598 | 0 | 0 | 0 | 1 Ref |
| MH572508 | Unassigned | Unassigned | Unassigned | 404_0  | Clustered           | 25 VC_404_0  | 25 | 0.5649 | 1          | 0.5649 | 0 | 0 | 0 | 1 Ref |
| MH572509 | Unassigned | Unassigned | Unassigned | 404_0  | Clustered           | 25 VC_404_0  | 25 | 0.5649 | 1          | 0.5649 | 0 | 0 | 0 | 1 Ref |
| MH572510 | Unassigned | Unassigned | Unassigned | 398_0  | Clustered           | 48 VC_398_0  | 48 | 0.4813 | 1          | 0.4813 | 0 | 0 | 0 | 1 Ref |



|          |            |            |            |        |                     |              |     |        |            |        |   |   |   |            |
|----------|------------|------------|------------|--------|---------------------|--------------|-----|--------|------------|--------|---|---|---|------------|
| MH572511 | Unassigned | Unassigned | Unassigned | 398_0  | Clustered           | 48 VC_398_0  | 48  | 0.4813 | 1          | 0.4813 | 0 | 0 | 0 | 1 Ref      |
| MH572512 | Unassigned | Unassigned | Unassigned | 402_0  | Clustered/Singleton | 1 VC_402_0   | 1   | 0      | 1          | 0      | 0 | 0 | 0 | 1 Ref      |
| MH572513 | Unassigned | Unassigned | Unassigned | 199_0  | Clustered           | 12 VC_199_0  | 12  | 0.448  | 1          | 0.448  | 0 | 0 | 0 | 1 Ref      |
| MH572514 | Unassigned | Unassigned | Unassigned | 199_0  | Clustered           | 12 VC_199_0  | 12  | 0.448  | 1          | 0.448  | 0 | 0 | 0 | 1 Ref      |
| MH572515 | Unassigned | Unassigned | Unassigned | 992_0  | Clustered           | 8 VC_992_0   | 8   | 0.3873 | 1          | 0.3873 | 0 | 0 | 0 | 1 Ref      |
| MH572516 | Unassigned | Unassigned | Unassigned | 1356_0 | Clustered           | 8 VC_1356_0  | 8   | 0.8729 | 0.99998222 | 0.8729 | 0 | 0 | 0 | 1 Ref      |
| MH572517 | Unassigned | Unassigned | Unassigned | 1357_0 | Clustered           | 6 VC_1357_0  | 6   | 1      | 1          | 1      | 0 | 0 | 0 | 1 Ref      |
| MH572518 | Unassigned | Unassigned | Unassigned | 1357_0 | Clustered           | 6 VC_1357_0  | 6   | 1      | 1          | 1      | 0 | 0 | 0 | 1 Ref      |
| MH572519 | Unassigned | Unassigned | Unassigned | 1357_0 | Clustered           | 6 VC_1357_0  | 6   | 1      | 1          | 1      | 0 | 0 | 0 | 1 Ref      |
| MH572520 | Unassigned | Unassigned | Unassigned | 1357_0 | Clustered           | 6 VC_1357_0  | 6   | 1      | 1          | 1      | 0 | 0 | 0 | 1 Ref      |
| MH572521 | Unassigned | Unassigned | Unassigned | 1077_0 | Clustered           | 48 VC_1077_0 | 48  | 0.8525 | 1          | 0.8525 | 0 | 0 | 0 | 1 Ref      |
| MH572522 | Unassigned | Unassigned | Unassigned | 1323_0 | Clustered           | 6 VC_1323_0  | 6   | 0.598  | 0.99460389 | 0.5948 | 0 | 0 | 0 | 1 Ref      |
| MH572524 | Unassigned | Unassigned | Unassigned | 1324_0 | Clustered           | 4 VC_1324_0  | 4   | 0.6008 | 0.54407361 | 0.3269 | 0 | 0 | 0 | 1 Ref      |
| MH572525 | Unassigned | Unassigned | Unassigned | 1243_0 | Clustered           | 52 VC_1243_0 | 52  | 0.9126 | 0.92708311 | 0.8461 | 0 | 0 | 0 | 1 Ref      |
| MH572526 | Unassigned | Unassigned | Unassigned | 1243_0 | Clustered           | 52 VC_1243_0 | 52  | 0.9126 | 0.92708311 | 0.8461 | 0 | 0 | 0 | 1 Ref      |
| MH576948 | Unassigned | Unassigned | Unassigned | 950_0  | Clustered           | 38 VC_950_0  | 38  | 0.9443 | 1          | 0.9443 | 0 | 0 | 0 | 1 Ref      |
| MH576949 | Unassigned | Unassigned | Unassigned | 514_0  | Clustered           | 75 VC_514_0  | 75  | 0.9402 | 1          | 0.9402 | 0 | 0 | 0 | 1 Ref      |
| MH576950 | Unassigned | Unassigned | Unassigned | 950_0  | Clustered           | 38 VC_950_0  | 38  | 0.9443 | 1          | 0.9443 | 0 | 0 | 0 | 1 Ref      |
| MH576951 | Unassigned | Unassigned | Unassigned | 950_0  | Clustered           | 38 VC_950_0  | 38  | 0.9443 | 1          | 0.9443 | 0 | 0 | 0 | 1 Ref      |
| MH576952 | Unassigned | Unassigned | Unassigned | 950_0  | Clustered           | 38 VC_950_0  | 38  | 0.9443 | 1          | 0.9443 | 0 | 0 | 0 | 1 Ref      |
| MH576953 | Unassigned | Unassigned | Unassigned | 551_7  | Clustered           | 28 VC_551_7  | 28  | 0.1661 | 1          | 0.1661 | 0 | 0 | 0 | 0.8519 Ref |
| MH576954 | Unassigned | Unassigned | Unassigned | 371_4  | Clustered           | 5 VC_371_4   | 5   | 0.0135 | 0.99999971 | 0.0135 | 0 | 0 | 0 | 1 Ref      |
| MH576955 | Unassigned | Unassigned | Unassigned | 950_0  | Clustered           | 38 VC_950_0  | 38  | 0.9443 | 1          | 0.9443 | 0 | 0 | 0 | 1 Ref      |
| MH576956 | Unassigned | Unassigned | Unassigned | 551_1  | Clustered           | 4 VC_551_1   | 4   | 0.0159 | 0.99968337 | 0.0159 | 0 | 0 | 0 | 0.6667 Ref |
| MH576957 | Unassigned | Unassigned | Unassigned | 950_0  | Clustered           | 38 VC_950_0  | 38  | 0.9443 | 1          | 0.9443 | 0 | 0 | 0 | 1 Ref      |
| MH576958 | Unassigned | Unassigned | Unassigned | 371_13 | Clustered           | 33 VC_371_13 | 33  | 0.179  | 1          | 0.179  | 0 | 0 | 0 | 0.8769 Ref |
| MH576959 | Unassigned | Unassigned | Unassigned | 325_23 | Clustered           | 17 VC_325_23 | 17  | 0.0716 | 1          | 0.0716 | 0 | 0 | 0 | 0.6397 Ref |
| MH576960 | Unassigned | Unassigned | Unassigned | 767_0  | Clustered           | 34 VC_767_0  | 34  | 0.9173 | 1          | 0.9173 | 0 | 0 | 0 | 1 Ref      |
| MH576961 | Unassigned | Unassigned | Unassigned | 950_0  | Clustered           | 38 VC_950_0  | 38  | 0.9443 | 1          | 0.9443 | 0 | 0 | 0 | 1 Ref      |
| MH576962 | Unassigned | Unassigned | Unassigned | 1158_0 | Clustered           | 3 VC_1158_0  | 3   | 0.3179 | 0.99335558 | 0.3158 | 0 | 0 | 0 | 1 Ref      |
| MH576963 | Unassigned | Unassigned | Unassigned | 1344_0 | Clustered           | 78 VC_1344_0 | 78  | 0.9732 | 1          | 0.9732 | 0 | 0 | 0 | 1 Ref      |
| MH576964 | Unassigned | Unassigned | Unassigned | 1071_0 | Clustered           | 20 VC_1071_0 | 20  | 0.3268 | 1          | 0.3268 | 0 | 0 | 0 | 0.9842 Ref |
| MH576965 | Unassigned | Unassigned | Unassigned | 1071_0 | Clustered           | 20 VC_1071_0 | 20  | 0.3268 | 1          | 0.3268 | 0 | 0 | 0 | 0.9842 Ref |
| MH576966 | Unassigned | Unassigned | Unassigned | 238_0  | Clustered           | 17 VC_238_0  | 17  | 0.6109 | 1          | 0.6109 | 0 | 0 | 0 | 1 Ref      |
| MH576967 | Unassigned | Unassigned | Unassigned | 371_4  | Clustered           | 5 VC_371_4   | 5   | 0.0135 | 0.99999971 | 0.0135 | 0 | 0 | 0 | 1 Ref      |
| MH576968 | Unassigned | Unassigned | Unassigned | 1071_0 | Clustered           | 20 VC_1071_0 | 20  | 0.3268 | 1          | 0.3268 | 0 | 0 | 0 | 0.9842 Ref |
| MH576969 | Unassigned | Unassigned | Unassigned | 1176_0 | Clustered           | 41 VC_1176_0 | 41  | 0.9558 | 1          | 0.9558 | 0 | 0 | 0 | 0.9976 Ref |
| MH576970 | Unassigned | Unassigned | Unassigned | 371_15 | Clustered           | 44 VC_371_15 | 44  | 0.1391 | 1          | 0.1391 | 0 | 0 | 0 | 0.7474 Ref |
| MH576971 | Unassigned | Unassigned | Unassigned | 325_23 | Clustered           | 17 VC_325_23 | 17  | 0.0716 | 1          | 0.0716 | 0 | 0 | 0 | 0.6397 Ref |
| MH576972 | Unassigned | Unassigned | Unassigned | 570_0  | Clustered           | 9 VC_570_0   | 9   | 0.499  | 1          | 0.499  | 0 | 0 | 0 | 1 Ref      |
| MH576973 | Unassigned | Unassigned | Unassigned | 888_1  | Clustered           | 3 VC_888_1   | 3   | 0.0289 | 0.99848448 | 0.0289 | 0 | 0 | 0 | 1 Ref      |
| MH576974 | Unassigned | Unassigned | Unassigned | 325_23 | Clustered           | 17 VC_325_23 | 17  | 0.0716 | 1          | 0.0716 | 0 | 0 | 0 | 0.6397 Ref |
| MH576975 | Unassigned | Unassigned | Unassigned | 325_46 | Clustered           | 2 VC_325_46  | 2   | 0.004  | 0.95751617 | 0.0039 | 0 | 0 | 0 | 1 Ref      |
| MH576976 | Unassigned | Unassigned | Unassigned | 869_0  | Clustered           | 9 VC_869_0   | 9   | 0.2624 | 1          | 0.2624 | 0 | 0 | 0 | 1 Ref      |
| MH576977 | Unassigned | Unassigned | Unassigned | 509_0  | Clustered           | 37 VC_509_0  | 37  | 0.9689 | 1          | 0.9689 | 0 | 0 | 0 | 1 Ref      |
| MH579717 | Unassigned | Unassigned | Unassigned | 480_0  | Clustered           | 19 VC_480_0  | 19  | 0.5445 | 1          | 0.5445 | 0 | 0 | 0 | 1 Ref      |
| MH586730 | Unassigned | Unassigned | Unassigned | 1049_0 | Clustered           | 8 VC_1049_0  | 8   | 0.6413 | 1          | 0.6413 | 0 | 0 | 0 | 1 Ref      |
| MH586731 | Unassigned | Unassigned | Unassigned | 329_0  | Clustered           | 2 VC_329_0   | 2   | 0.0051 | 0.95464582 | 0.0048 | 0 | 0 | 0 | 1 Ref      |
| MH587638 | Unassigned | Unassigned | Unassigned | 823_0  | Clustered           | 124 VC_823_0 | 124 | 0.9492 | 1          | 0.9492 | 0 | 0 | 0 | 1 Ref      |
| MH588544 | Unassigned | Unassigned | Unassigned | 976_3  | Clustered           | 2 VC_976_3   | 2   | 0.0258 | 0.88402892 | 0.0228 | 0 | 0 | 0 | 1 Ref      |
| MH588545 | Unassigned | Unassigned | Unassigned | 976_2  | Clustered           | 2 VC_976_2   | 2   | 0.0278 | 0.95410794 | 0.0266 | 0 | 0 | 0 | 1 Ref      |
| MH590587 | Unassigned | Unassigned | Unassigned | 551_8  | Clustered           | 19 VC_551_8  | 19  | 0.1039 | 1          | 0.1039 | 0 | 0 | 0 | 0.8713 Ref |
| MH590588 | Unassigned | Unassigned | Unassigned | 371_11 | Clustered           | 31 VC_371_11 | 31  | 0.0927 | 1          | 0.0927 | 0 | 0 | 0 | 0.7011 Ref |
| MH590589 | Unassigned | Unassigned | Unassigned | 1072_2 | Clustered           | 5 VC_1072_2  | 5   | 0.1003 | 0.99999315 | 0.1003 | 0 | 0 | 0 | 1 Ref      |
| MH590591 | Unassigned | Unassigned | Unassigned | 508_0  | Clustered           | 32 VC_508_0  | 32  | 0.906  | 1          | 0.906  | 0 | 0 | 0 | 1 Ref      |
| MH590592 | Unassigned | Unassigned | Unassigned | 556_0  | Clustered           | 21 VC_556_0  | 21  | 0.9912 | 1          | 0.9912 | 0 | 0 | 0 | 1 Ref      |
| MH590593 | Unassigned | Unassigned | Unassigned | 558_22 | Clustered           | 4 VC_558_22  | 4   | 0.01   | 0.99312819 | 0.0099 | 0 | 0 | 0 | 0.8333 Ref |
| MH590594 | Unassigned | Unassigned | Unassigned | 371_10 | Clustered/Singleton | 1 VC_371_10  | 1   | 0      | 1          | 0      | 0 | 0 | 0 | 1 Ref      |
| MH590595 | Unassigned | Unassigned | Unassigned | 325_53 | Clustered           | 7 VC_325_53  | 7   | 0.0242 | 1          | 0.0242 | 0 | 0 | 0 | 0.9048 Ref |
| MH590596 | Unassigned | Unassigned | Unassigned | 520_78 | Clustered           | 2 VC_520_78  | 2   | 0.008  | 0.95761153 | 0.0076 | 0 | 0 | 0 | 1 Ref      |
| MH590597 | Unassigned | Unassigned | Unassigned | 1071_0 | Clustered           | 20 VC_1071_0 | 20  | 0.3268 | 1          | 0.3268 | 0 | 0 | 0 | 0.9842 Ref |
| MH590598 | Unassigned | Unassigned | Unassigned | 520_25 | Clustered/Singleton | 1 VC_520_25  | 1   | 0      | 1          | 0      | 0 | 0 | 0 | 1 Ref      |
| MH590599 | Unassigned | Unassigned | Unassigned | 1071_0 | Clustered           | 20 VC_1071_0 | 20  | 0.3268 | 1          | 0.3268 | 0 | 0 | 0 | 0.9842 Ref |
| MH590600 | Unassigned | Unassigned | Unassigned | 1352_0 | Clustered           | 31 VC_1352_0 | 31  | 0.849  | 1          | 0.849  | 0 | 0 | 0 | 1 Ref      |
| MH590601 | Unassigned | Unassigned | Unassigned | 981_1  | Clustered           | 26 VC_981_1  | 26  | 0.7009 | 1          | 0.7009 | 0 | 0 | 0 | 1 Ref      |
| MH590602 | Unassigned | Unassigned | Unassigned | 520_38 | Clustered           | 6 VC_520_38  | 6   | 0.0519 | 1          | 0.0519 | 0 | 0 | 0 | 0.8667 Ref |
| MH590603 | Unassigned | Unassigned | Unassigned | 1182_1 | Clustered/Singleton | 1 VC_1182_1  | 1   | 0      | 1          | 0      | 0 | 0 | 0 | 1 Ref      |
| MH590604 | Unassigned | Unassigned | Unassigned | 1163_0 | Clustered           | 28 VC_1163_0 | 28  | 0.4923 | 1          | 0.4923 | 0 | 0 | 0 | 1 Ref      |
| MH590605 | Unassigned | Unassigned | Unassigned | 761_0  | Clustered           | 67 VC_761_0  | 67  | 0.8947 | 1          | 0.8947 | 0 | 0 | 0 | 1 Ref      |
| MH590606 | Unassigned | Unassigned | Unassigned | 1163_0 | Clustered           | 28 VC_1163_0 | 28  | 0.4923 | 1          | 0.4923 | 0 | 0 | 0 | 1 Ref      |
| MH595538 | Unassigned | Unassigned | Unassigned | 346_3  | Clustered/Singleton | 1 VC_346_3   | 1   | 0      | 1          | 0      | 0 | 0 | 0 | 1 Ref      |
| MH598512 | Unassigned | Unassigned | Unassigned | 828_0  | Clustered           | 3 VC_828_0   | 3   | 0.4748 | 0.99843555 | 0.4741 | 0 | 0 | 0 | 1 Ref      |
| MH598798 | Unassigned | Unassigned | Unassigned | 480_0  | Clustered           | 19 VC_480_0  | 19  | 0.5445 | 1          | 0.5445 | 0 | 0 | 0 | 1 Ref      |
| MH598800 | Unassigned | Unassigned | Unassigned | 480_0  | Clustered           | 19 VC_480_0  | 19  | 0.5445 | 1          | 0.5445 | 0 | 0 | 0 | 1 Ref      |
| MH598802 | Unassigned | Unassigned | Unassigned | 480_0  | Clustered           | 19 VC_480_0  | 19  | 0.5445 | 1          | 0.5445 | 0 | 0 | 0 | 1 Ref      |
| MH598803 | Unassigned | Unassigned | Unassigned | 480_0  | Clustered           | 19 VC_480_0  | 19  | 0.5445 | 1          | 0.5445 | 0 | 0 | 0 | 1 Ref      |
| MH598804 | Unassigned | Unassigned | Unassigned | 480_0  | Clustered           | 19 VC_480_0  | 19  | 0.5445 | 1          | 0.5445 | 0 | 0 | 0 | 1 Ref      |
| MH598805 | Unassigned | Unassigned | Unassigned | 480_0  | Clustered           | 19 VC_480_0  | 19  | 0.5445 | 1          | 0.5445 | 0 | 0 | 0 | 1 Ref      |
| MH598807 | Unassigned | Unassigned | Unassigned | 480_0  | Clustered           | 19 VC_480_0  | 19  | 0.5445 | 1          | 0.5445 | 0 | 0 | 0 | 1 Ref      |
| MH599087 | Unassigned | Unassigned | Unassigned | 882_0  | Clustered           | 20 VC_882_0  | 20  | 0.9917 | 1          | 0.9917 | 0 | 0 | 0 | 1 Ref      |
| MH606185 | Unassigned | Unassigned | Unassigned | 85_5   | Clustered/Singleton | 1 VC_85_5    | 1   | 0      | 1          | 0      | 0 | 0 | 0 | 1 Ref      |



|          |            |            |            |        |                     |              |     |        |            |        |   |   |   |        |     |
|----------|------------|------------|------------|--------|---------------------|--------------|-----|--------|------------|--------|---|---|---|--------|-----|
| MH616963 | Unassigned | Unassigned | Unassigned | 673_0  | Clustered           | 15 VC_673_0  | 15  | 0.8234 | 1          | 0.8234 | 0 | 0 | 0 | 0.7619 | Ref |
| MH618488 | Unassigned | Unassigned | Unassigned | 108_0  | Clustered           | 33 VC_108_0  | 33  | 0.949  | 1          | 0.949  | 0 | 0 | 0 | 1      | Ref |
| MH629685 | Unassigned | Unassigned | Unassigned | 432_16 | Clustered/Singleton | 1 VC_432_16  | 1   | 0      | 1          | 0      | 0 | 0 | 0 | 1      | Ref |
| MH631453 | Unassigned | Unassigned | Unassigned | 592_0  | Clustered           | 50 VC_592_0  | 50  | 0.7314 | 1          | 0.7314 | 0 | 0 | 0 | 1      | Ref |
| MH631454 | Unassigned | Unassigned | Unassigned | 191_19 | Clustered           | 12 VC_191_19 | 12  | 0.0655 | 1          | 0.0655 | 0 | 0 | 0 | 0.8636 | Ref |
| MH632117 | Unassigned | Unassigned | Unassigned | 325_49 | Clustered           | 4 VC_325_49  | 4   | 0.014  | 0.99995965 | 0.014  | 0 | 0 | 0 | 1      | Ref |
| MH632118 | Unassigned | Unassigned | Unassigned | 325_27 | Clustered           | 2 VC_325_27  | 2   | 0.0044 | 0.95750955 | 0.0044 | 0 | 0 | 0 | 1      | Ref |
| MH632119 | Unassigned | Unassigned | Unassigned | 520_93 | Clustered           | 2 VC_520_93  | 2   | 0.0104 | 0.95762079 | 0.0099 | 0 | 0 | 0 | 1      | Ref |
| MH633484 | Unassigned | Unassigned | Unassigned | 938_0  | Clustered           | 99 VC_938_0  | 99  | 0.9119 | 1          | 0.9119 | 0 | 0 | 0 | 0.9928 | Ref |
| MH633485 | Unassigned | Unassigned | Unassigned | 938_0  | Clustered           | 99 VC_938_0  | 99  | 0.9119 | 1          | 0.9119 | 0 | 0 | 0 | 0.9928 | Ref |
| MH633486 | Unassigned | Unassigned | Unassigned | 938_0  | Clustered           | 99 VC_938_0  | 99  | 0.9119 | 1          | 0.9119 | 0 | 0 | 0 | 0.9928 | Ref |
| MH633487 | Unassigned | Unassigned | Unassigned | 938_0  | Clustered           | 99 VC_938_0  | 99  | 0.9119 | 1          | 0.9119 | 0 | 0 | 0 | 0.9928 | Ref |
| MH638294 | Unassigned | Unassigned | Unassigned | 162_0  | Clustered           | 18 VC_162_0  | 18  | 0.7403 | 1          | 0.7403 | 0 | 0 | 0 | 0.8627 | Ref |
| MH638309 | Unassigned | Unassigned | Unassigned | 187_3  | Clustered           | 9 VC_187_3   | 9   | 0.1971 | 1          | 0.1971 | 0 | 0 | 0 | 0.8611 | Ref |
| MH638310 | Unassigned | Unassigned | Unassigned | 883_0  | Clustered           | 10 VC_883_0  | 10  | 0.2015 | 1          | 0.2015 | 0 | 0 | 0 | 1      | Ref |
| MH638311 | Unassigned | Unassigned | Unassigned | 884_0  | Clustered           | 28 VC_884_0  | 28  | 0.6211 | 1          | 0.6211 | 0 | 0 | 0 | 0.9841 | Ref |
| MH638312 | Unassigned | Unassigned | Unassigned | 187_3  | Clustered           | 9 VC_187_3   | 9   | 0.1971 | 1          | 0.1971 | 0 | 0 | 0 | 0.8611 | Ref |
| MH643777 | Unassigned | Unassigned | Unassigned | 179_0  | Clustered           | 53 VC_179_0  | 53  | 0.9137 | 1          | 0.9137 | 0 | 0 | 0 | 1      | Ref |
| MH643778 | Unassigned | Unassigned | Unassigned | 179_0  | Clustered           | 53 VC_179_0  | 53  | 0.9137 | 1          | 0.9137 | 0 | 0 | 0 | 1      | Ref |
| MH645904 | Unassigned | Unassigned | Unassigned | 972_0  | Clustered           | 6 VC_972_0   | 6   | 0.2892 | 1          | 0.2892 | 0 | 0 | 0 | 1      | Ref |
| MH651166 | Unassigned | Unassigned | Unassigned | 1093_0 | Clustered           | 40 VC_1093_0 | 40  | 0.8754 | 1          | 0.8754 | 0 | 0 | 0 | 1      | Ref |
| MH651167 | Unassigned | Unassigned | Unassigned | 685_0  | Clustered           | 16 VC_685_0  | 16  | 0.2972 | 1          | 0.2972 | 0 | 0 | 0 | 0.9167 | Ref |
| MH651168 | Unassigned | Unassigned | Unassigned | 1093_0 | Clustered           | 40 VC_1093_0 | 40  | 0.8754 | 1          | 0.8754 | 0 | 0 | 0 | 1      | Ref |
| MH651169 | Unassigned | Unassigned | Unassigned | 520_45 | Clustered           | 7 VC_520_45  | 7   | 0.0635 | 1          | 0.0635 | 0 | 0 | 0 | 0.8095 | Ref |
| MH651170 | Unassigned | Unassigned | Unassigned | 517_1  | Clustered           | 108 VC_517_1 | 108 | 0.8483 | 1          | 0.8483 | 0 | 0 | 0 | 0.9955 | Ref |
| MH651171 | Unassigned | Unassigned | Unassigned | 238_0  | Clustered           | 17 VC_238_0  | 17  | 0.6109 | 1          | 0.6109 | 0 | 0 | 0 | 1      | Ref |
| MH651172 | Unassigned | Unassigned | Unassigned | 1072_2 | Clustered           | 5 VC_1072_2  | 5   | 0.1003 | 0.99999315 | 0.1003 | 0 | 0 | 0 | 1      | Ref |
| MH651174 | Unassigned | Unassigned | Unassigned | 551_6  | Clustered           | 22 VC_551_6  | 22  | 0.1214 | 1          | 0.1214 | 0 | 0 | 0 | 0.8095 | Ref |
| MH651175 | Unassigned | Unassigned | Unassigned | 371_16 | Clustered           | 42 VC_371_16 | 42  | 0.1341 | 1          | 0.1341 | 0 | 0 | 0 | 0.7282 | Ref |
| MH651176 | Unassigned | Unassigned | Unassigned | 557_1  | Clustered           | 11 VC_557_1  | 11  | 0.4945 | 1          | 0.4945 | 0 | 0 | 0 | 0.7818 | Ref |
| MH651177 | Unassigned | Unassigned | Unassigned | 371_4  | Clustered           | 5 VC_371_4   | 5   | 0.0135 | 0.99999971 | 0.0135 | 0 | 0 | 0 | 1      | Ref |
| MH651178 | Unassigned | Unassigned | Unassigned | 520_32 | Clustered/Singleton | 1 VC_520_32  | 1   | 0      | 1          | 0      | 0 | 0 | 0 | 1      | Ref |
| MH651179 | Unassigned | Unassigned | Unassigned | 514_0  | Clustered           | 75 VC_514_0  | 75  | 0.9402 | 1          | 0.9402 | 0 | 0 | 0 | 1      | Ref |
| MH651180 | Unassigned | Unassigned | Unassigned | 325_38 | Clustered           | 6 VC_325_38  | 6   | 0.0267 | 1          | 0.0267 | 0 | 0 | 0 | 0.8    | Ref |
| MH651181 | Unassigned | Unassigned | Unassigned | 1344_0 | Clustered           | 78 VC_1344_0 | 78  | 0.9732 | 1          | 0.9732 | 0 | 0 | 0 | 1      | Ref |
| MH651182 | Unassigned | Unassigned | Unassigned | 890_0  | Clustered           | 3 VC_890_0   | 3   | 0.3565 | 0.99830951 | 0.3559 | 0 | 0 | 0 | 1      | Ref |
| MH651183 | Unassigned | Unassigned | Unassigned | 520_41 | Clustered           | 2 VC_520_41  | 2   | 0.0139 | 0.95761457 | 0.0134 | 0 | 0 | 0 | 1      | Ref |
| MH651184 | Unassigned | Unassigned | Unassigned | 371_15 | Clustered           | 44 VC_371_15 | 44  | 0.1391 | 1          | 0.1391 | 0 | 0 | 0 | 0.7474 | Ref |
| MH651185 | Unassigned | Unassigned | Unassigned | 557_1  | Clustered           | 11 VC_557_1  | 11  | 0.4945 | 1          | 0.4945 | 0 | 0 | 0 | 0.7818 | Ref |
| MH651186 | Unassigned | Unassigned | Unassigned | 371_16 | Clustered           | 42 VC_371_16 | 42  | 0.1341 | 1          | 0.1341 | 0 | 0 | 0 | 0.7282 | Ref |
| MH651188 | Unassigned | Unassigned | Unassigned | 520_80 | Clustered           | 3 VC_520_80  | 3   | 0.0295 | 0.99859904 | 0.0295 | 0 | 0 | 0 | 1      | Ref |
| MH651189 | Unassigned | Unassigned | Unassigned | 406_0  | Clustered           | 11 VC_406_0  | 11  | 0.9449 | 1          | 0.9449 | 0 | 0 | 0 | 1      | Ref |
| MH651190 | Unassigned | Unassigned | Unassigned | 981_1  | Clustered           | 26 VC_981_1  | 26  | 0.7009 | 1          | 0.7009 | 0 | 0 | 0 | 1      | Ref |
| MH669000 | Unassigned | Unassigned | Unassigned | 1095_0 | Clustered           | 16 VC_1095_0 | 16  | 0.458  | 1          | 0.458  | 0 | 0 | 0 | 1      | Ref |
| MH669001 | Unassigned | Unassigned | Unassigned | 520_21 | Clustered/Singleton | 1 VC_520_21  | 1   | 0      | 1          | 0      | 0 | 0 | 0 | 1      | Ref |
| MH669002 | Unassigned | Unassigned | Unassigned | 551_6  | Clustered           | 22 VC_551_6  | 22  | 0.1214 | 1          | 0.1214 | 0 | 0 | 0 | 0.8095 | Ref |
| MH669003 | Unassigned | Unassigned | Unassigned | 520_80 | Clustered           | 3 VC_520_80  | 3   | 0.0295 | 0.99859904 | 0.0295 | 0 | 0 | 0 | 1      | Ref |
| MH669004 | Unassigned | Unassigned | Unassigned | 981_1  | Clustered           | 26 VC_981_1  | 26  | 0.7009 | 1          | 0.7009 | 0 | 0 | 0 | 1      | Ref |
| MH669006 | Unassigned | Unassigned | Unassigned | 872_0  | Clustered           | 31 VC_872_0  | 31  | 0.8151 | 1          | 0.8151 | 0 | 0 | 0 | 0.8194 | Ref |
| MH669007 | Unassigned | Unassigned | Unassigned | 767_0  | Clustered           | 34 VC_767_0  | 34  | 0.9173 | 1          | 0.9173 | 0 | 0 | 0 | 1      | Ref |
| MH669008 | Unassigned | Unassigned | Unassigned | 558_50 | Clustered           | 15 VC_558_50 | 15  | 0.0468 | 1          | 0.0468 | 0 | 0 | 0 | 0.9238 | Ref |
| MH669011 | Unassigned | Unassigned | Unassigned | 325_44 | Clustered           | 3 VC_325_44  | 3   | 0.0157 | 0.99859171 | 0.0157 | 0 | 0 | 0 | 1      | Ref |
| MH669012 | Unassigned | Unassigned | Unassigned | 520_73 | Clustered           | 2 VC_520_73  | 2   | 0.0107 | 0.95762743 | 0.0103 | 0 | 0 | 0 | 1      | Ref |
| MH669013 | Unassigned | Unassigned | Unassigned | 767_0  | Clustered           | 34 VC_767_0  | 34  | 0.9173 | 1          | 0.9173 | 0 | 0 | 0 | 1      | Ref |
| MH669014 | Unassigned | Unassigned | Unassigned | 520_69 | Clustered/Singleton | 1 VC_520_69  | 1   | 0      | 1          | 0      | 0 | 0 | 0 | 1      | Ref |
| MH669015 | Unassigned | Unassigned | Unassigned | 1178_0 | Clustered           | 24 VC_1178_0 | 24  | 0.9524 | 1          | 0.9524 | 0 | 0 | 0 | 1      | Ref |
| MH669016 | Unassigned | Unassigned | Unassigned | 981_1  | Clustered           | 26 VC_981_1  | 26  | 0.7009 | 1          | 0.7009 | 0 | 0 | 0 | 1      | Ref |
| MH669017 | Unassigned | Unassigned | Unassigned | 546_4  | Clustered           | 16 VC_546_4  | 16  | 0.2517 | 0.9999998  | 0.2517 | 0 | 0 | 0 | 0.9417 | Ref |
| MH669274 | Unassigned | Unassigned | Unassigned | 779_0  | Clustered           | 37 VC_779_0  | 37  | 0.5682 | 1          | 0.5682 | 0 | 0 | 0 | 1      | Ref |
| MH674343 | Unassigned | Unassigned | Unassigned | 233_0  | Clustered           | 2 VC_233_0   | 2   | 0.7179 | 0.72985431 | 0.5239 | 0 | 0 | 0 | 1      | Ref |
| MH675552 | Unassigned | Unassigned | Unassigned | 1018_1 | Clustered           | 10 VC_1018_1 | 10  | 0.7518 | 1          | 0.7518 | 0 | 0 | 0 | 0.8    | Ref |
| MH675927 | Unassigned | Unassigned | Unassigned | 848_0  | Clustered           | 28 VC_848_0  | 28  | 0.7927 | 1          | 0.7927 | 0 | 0 | 0 | 1      | Ref |
| MH684921 | Unassigned | Unassigned | Unassigned | 70_0   | Clustered           | 27 VC_70_0   | 27  | 0.5981 | 1          | 0.5981 | 0 | 0 | 0 | 0.9886 | Ref |
| MH688040 | Unassigned | Unassigned | Unassigned | 133_22 | Clustered           | 13 VC_133_22 | 13  | 0.0804 | 1          | 0.0804 | 0 | 0 | 0 | 0.8205 | Ref |
| MH688453 | Unassigned | Unassigned | Unassigned | 938_0  | Clustered           | 99 VC_938_0  | 99  | 0.9119 | 1          | 0.9119 | 0 | 0 | 0 | 0.9928 | Ref |
| MH697575 | Unassigned | Unassigned | Unassigned | 325_52 | Clustered           | 5 VC_325_52  | 5   | 0.0147 | 0.99999073 | 0.0147 | 0 | 0 | 0 | 0.7    | Ref |
| MH697576 | Unassigned | Unassigned | Unassigned | 521_0  | Clustered           | 37 VC_521_0  | 37  | 0.912  | 1          | 0.912  | 0 | 0 | 0 | 1      | Ref |
| MH697577 | Unassigned | Unassigned | Unassigned | 810_0  | Clustered           | 18 VC_810_0  | 18  | 0.9121 | 1          | 0.9121 | 0 | 0 | 0 | 1      | Ref |
| MH697578 | Unassigned | Unassigned | Unassigned | 236_0  | Clustered           | 72 VC_236_0  | 72  | 0.8104 | 1          | 0.8104 | 0 | 0 | 0 | 1      | Ref |
| MH697579 | Unassigned | Unassigned | Unassigned | 558_73 | Clustered           | 2 VC_558_73  | 2   | 0.0033 | 0.84374839 | 0.0028 | 0 | 0 | 0 | 1      | Ref |
| MH697580 | Unassigned | Unassigned | Unassigned | 406_0  | Clustered           | 11 VC_406_0  | 11  | 0.9449 | 1          | 0.9449 | 0 | 0 | 0 | 1      | Ref |
| MH697581 | Unassigned | Unassigned | Unassigned | 325_40 | Clustered           | 2 VC_325_40  | 2   | 0.004  | 0.95574341 | 0.0038 | 0 | 0 | 0 | 1      | Ref |
| MH697582 | Unassigned | Unassigned | Unassigned | 546_4  | Clustered           | 16 VC_546_4  | 16  | 0.2517 | 0.9999998  | 0.2517 | 0 | 0 | 0 | 0.9417 | Ref |
| MH697583 | Unassigned | Unassigned | Unassigned | 546_4  | Clustered           | 16 VC_546_4  | 16  | 0.2517 | 0.9999998  | 0.2517 | 0 | 0 | 0 | 0.9417 | Ref |
| MH697584 | Unassigned | Unassigned | Unassigned | 508_0  | Clustered           | 32 VC_508_0  | 32  | 0.906  | 1          | 0.906  | 0 | 0 | 0 | 1      | Ref |
| MH697585 | Unassigned | Unassigned | Unassigned | 521_0  | Clustered           | 37 VC_521_0  | 37  | 0.912  | 1          | 0.912  | 0 | 0 | 0 | 1      | Ref |
| MH697586 | Unassigned | Unassigned | Unassigned | 558_20 | Clustered           | 17 VC_558_20 | 17  | 0.054  | 1          | 0.054  | 0 | 0 | 0 | 0.9926 | Ref |
| MH697587 | Unassigned | Unassigned | Unassigned | 763_1  | Clustered           | 9 VC_763_1   | 9   | 0.3706 | 1          | 0.3706 | 0 | 0 | 0 | 1      | Ref |
| MH697588 | Unassigned | Unassigned | Unassigned | 517_1  | Clustered           | 108 VC_517_1 | 108 | 0.8483 | 1          | 0.8483 | 0 | 0 | 0 | 0.9955 | Ref |
| MH697590 | Unassigned | Unassigned | Unassigned | 558_20 | Clustered           | 17 VC_558_20 | 17  | 0.054  | 1          | 0.054  | 0 | 0 | 0 | 0.9926 | Ref |
| MH697591 | Unassigned | Unassigned | Unassigned | 216_6  | Clustered           | 42 VC_216_6  | 42  | 0.473  | 1          | 0.473  | 0 | 0 | 0 | 0.8351 | Ref |



|          |            |            |            |        |                     |              |     |        |            |        |   |   |   |            |
|----------|------------|------------|------------|--------|---------------------|--------------|-----|--------|------------|--------|---|---|---|------------|
| MH697592 | Unassigned | Unassigned | Unassigned | 238_0  | Clustered           | 17 VC_238_0  | 17  | 0.6109 | 1          | 0.6109 | 0 | 0 | 0 | 1 Ref      |
| MH697593 | Unassigned | Unassigned | Unassigned | 521_0  | Clustered           | 37 VC_521_0  | 37  | 0.912  | 1          | 0.912  | 0 | 0 | 0 | 1 Ref      |
| MH707430 | Unassigned | Unassigned | Unassigned | 1358_0 | Clustered           | 5 VC_1358_0  | 5   | 1      | 1          | 1      | 0 | 0 | 0 | 1 Ref      |
| MH709120 | Unassigned | Unassigned | Unassigned | 133_17 | Clustered/Singleton | 1 VC_133_17  | 1   | 0      | 1          | 0      | 0 | 0 | 0 | 1 Ref      |
| MH709121 | Unassigned | Unassigned | Unassigned | 133_10 | Clustered           | 10 VC_133_10 | 10  | 0.0527 | 1          | 0.0527 | 0 | 0 | 0 | 1 Ref      |
| MH713599 | Unassigned | Unassigned | Unassigned | 492_1  | Clustered           | 20 VC_492_1  | 20  | 0.4176 | 1          | 0.4176 | 0 | 0 | 0 | 1 Ref      |
| MH717096 | Unassigned | Unassigned | Unassigned | 30_1   | Clustered           | 16 VC_30_1   | 16  | 0.1973 | 1          | 0.1973 | 0 | 0 | 0 | 0.8333 Ref |
| MH717097 | Unassigned | Unassigned | Unassigned | 461_0  | Clustered           | 96 VC_461_0  | 96  | 0.9307 | 1          | 0.9307 | 0 | 0 | 0 | 0.9575 Ref |
| MH717098 | Unassigned | Unassigned | Unassigned | 392_0  | Clustered           | 126 VC_392_0 | 126 | 0.9621 | 1          | 0.9621 | 0 | 0 | 0 | 1 Ref      |
| MH717099 | Unassigned | Unassigned | Unassigned | 392_0  | Clustered           | 126 VC_392_0 | 126 | 0.9621 | 1          | 0.9621 | 0 | 0 | 0 | 1 Ref      |
| MH717709 | Unassigned | Unassigned | Unassigned | 385_0  | Clustered           | 51 VC_385_0  | 51  | 0.8754 | 1          | 0.8754 | 0 | 0 | 0 | 1 Ref      |
| MH719189 | Unassigned | Unassigned | Unassigned | 251_0  | Clustered           | 22 VC_251_0  | 22  | 0.6508 | 1          | 0.6508 | 0 | 0 | 0 | 1 Ref      |
| MH719190 | Unassigned | Unassigned | Unassigned | 251_0  | Clustered           | 22 VC_251_0  | 22  | 0.6508 | 1          | 0.6508 | 0 | 0 | 0 | 1 Ref      |
| MH719191 | Unassigned | Unassigned | Unassigned | 251_0  | Clustered           | 22 VC_251_0  | 22  | 0.6508 | 1          | 0.6508 | 0 | 0 | 0 | 1 Ref      |
| MH719192 | Unassigned | Unassigned | Unassigned | 251_0  | Clustered           | 22 VC_251_0  | 22  | 0.6508 | 1          | 0.6508 | 0 | 0 | 0 | 1 Ref      |
| MH719193 | Unassigned | Unassigned | Unassigned | 251_0  | Clustered           | 22 VC_251_0  | 22  | 0.6508 | 1          | 0.6508 | 0 | 0 | 0 | 1 Ref      |
| MH719194 | Unassigned | Unassigned | Unassigned | 251_0  | Clustered           | 22 VC_251_0  | 22  | 0.6508 | 1          | 0.6508 | 0 | 0 | 0 | 1 Ref      |
| MH719195 | Unassigned | Unassigned | Unassigned | 251_0  | Clustered           | 22 VC_251_0  | 22  | 0.6508 | 1          | 0.6508 | 0 | 0 | 0 | 1 Ref      |
| MH725810 | Unassigned | Unassigned | Unassigned | 76_0   | Clustered           | 37 VC_76_0   | 37  | 0.9403 | 1          | 0.9403 | 0 | 0 | 0 | 1 Ref      |
| MH727543 | Unassigned | Unassigned | Unassigned | 558_2  | Clustered           | 2 VC_558_2   | 2   | 0.0032 | 0.66859979 | 0.0021 | 0 | 0 | 0 | 1 Ref      |
| MH727544 | Unassigned | Unassigned | Unassigned | 236_0  | Clustered           | 72 VC_236_0  | 72  | 0.8104 | 1          | 0.8104 | 0 | 0 | 0 | 1 Ref      |
| MH727546 | Unassigned | Unassigned | Unassigned | 508_0  | Clustered           | 32 VC_508_0  | 32  | 0.906  | 1          | 0.906  | 0 | 0 | 0 | 1 Ref      |
| MH727547 | Unassigned | Unassigned | Unassigned | 767_0  | Clustered           | 34 VC_767_0  | 34  | 0.9173 | 1          | 0.9173 | 0 | 0 | 0 | 1 Ref      |
| MH727548 | Unassigned | Unassigned | Unassigned | 520_5  | Clustered/Singleton | 1 VC_520_5   | 1   | 0      | 1          | 0      | 0 | 0 | 0 | 1 Ref      |
| MH727549 | Unassigned | Unassigned | Unassigned | 810_0  | Clustered           | 18 VC_810_0  | 18  | 0.9121 | 1          | 0.9121 | 0 | 0 | 0 | 1 Ref      |
| MH727551 | Unassigned | Unassigned | Unassigned | 546_4  | Clustered           | 16 VC_546_4  | 16  | 0.2517 | 0.9999998  | 0.2517 | 0 | 0 | 0 | 0.9417 Ref |
| MH727552 | Unassigned | Unassigned | Unassigned | 767_0  | Clustered           | 34 VC_767_0  | 34  | 0.9173 | 1          | 0.9173 | 0 | 0 | 0 | 1 Ref      |
| MH727553 | Unassigned | Unassigned | Unassigned | 939_0  | Clustered           | 15 VC_939_0  | 15  | 1      | 0          | 0      | 0 | 0 | 0 | 1 Ref      |
| MH727554 | Unassigned | Unassigned | Unassigned | 514_0  | Clustered           | 75 VC_514_0  | 75  | 0.9402 | 1          | 0.9402 | 0 | 0 | 0 | 1 Ref      |
| MH727555 | Unassigned | Unassigned | Unassigned | 371_16 | Clustered           | 42 VC_371_16 | 42  | 0.1341 | 1          | 0.1341 | 0 | 0 | 0 | 0.7282 Ref |
| MH727557 | Unassigned | Unassigned | Unassigned | 551_6  | Clustered           | 22 VC_551_6  | 22  | 0.1214 | 1          | 0.1214 | 0 | 0 | 0 | 0.8095 Ref |
| MH727558 | Unassigned | Unassigned | Unassigned | 558_56 | Clustered/Singleton | 1 VC_558_56  | 1   | 0      | 1          | 0      | 0 | 0 | 0 | 1 Ref      |
| MH727559 | Unassigned | Unassigned | Unassigned | 889_0  | Clustered           | 16 VC_889_0  | 16  | 0.2969 | 1          | 0.2969 | 0 | 0 | 0 | 1 Ref      |
| MH727560 | Unassigned | Unassigned | Unassigned | 1199_0 | Clustered           | 8 VC_1199_0  | 8   | 0.7928 | 1          | 0.7928 | 0 | 0 | 0 | 1 Ref      |
| MH727561 | Unassigned | Unassigned | Unassigned | 372_1  | Clustered           | 9 VC_372_1   | 9   | 0.194  | 1          | 0.194  | 0 | 0 | 0 | 1 Ref      |
| MH727562 | Unassigned | Unassigned | Unassigned | 939_0  | Clustered           | 15 VC_939_0  | 15  | 1      | 0          | 0      | 0 | 0 | 0 | 1 Ref      |
| MH727563 | Unassigned | Unassigned | Unassigned | 517_1  | Clustered           | 108 VC_517_1 | 108 | 0.8483 | 1          | 0.8483 | 0 | 0 | 0 | 0.9955 Ref |
| MH727564 | Unassigned | Unassigned | Unassigned | 1071_0 | Clustered           | 20 VC_1071_0 | 20  | 0.3268 | 1          | 0.3268 | 0 | 0 | 0 | 0.9842 Ref |
| MH727593 | Unassigned | Unassigned | Unassigned | 184_0  | Clustered           | 2 VC_184_0   | 2   | 0.7964 | 0.93668477 | 0.746  | 0 | 0 | 0 | 1 Ref      |
| MH729818 | Unassigned | Unassigned | Unassigned | 452_0  | Clustered           | 66 VC_452_0  | 66  | 0.9248 | 1          | 0.9248 | 0 | 0 | 0 | 1 Ref      |
| MH729819 | Unassigned | Unassigned | Unassigned | 584_0  | Clustered           | 28 VC_584_0  | 28  | 0.7704 | 1          | 0.7704 | 0 | 0 | 0 | 1 Ref      |
| MH729874 | Unassigned | Unassigned | Unassigned | 491_0  | Clustered           | 36 VC_491_0  | 36  | 0.5336 | 1          | 0.5336 | 0 | 0 | 0 | 0.9714 Ref |
| MH730557 | Unassigned | Unassigned | Unassigned | 1359_0 | Clustered           | 11 VC_1359_0 | 11  | 1      | 0          | 0      | 0 | 0 | 0 | 1 Ref      |
| MH733496 | Unassigned | Unassigned | Unassigned | 779_0  | Clustered           | 37 VC_779_0  | 37  | 0.5682 | 1          | 0.5682 | 0 | 0 | 0 | 1 Ref      |
| MH744414 | Unassigned | Unassigned | Unassigned | 325_10 | Clustered           | 3 VC_325_10  | 3   | 0.012  | 0.99859169 | 0.012  | 0 | 0 | 0 | 1 Ref      |
| MH744415 | Unassigned | Unassigned | Unassigned | 520_36 | Clustered/Singleton | 1 VC_520_36  | 1   | 0      | 1          | 0      | 0 | 0 | 0 | 1 Ref      |
| MH744416 | Unassigned | Unassigned | Unassigned | 1344_0 | Clustered           | 78 VC_1344_0 | 78  | 0.9732 | 1          | 0.9732 | 0 | 0 | 0 | 1 Ref      |
| MH744417 | Unassigned | Unassigned | Unassigned | 371_16 | Clustered           | 42 VC_371_16 | 42  | 0.1341 | 1          | 0.1341 | 0 | 0 | 0 | 0.7282 Ref |
| MH744418 | Unassigned | Unassigned | Unassigned | 1158_1 | Clustered           | 2 VC_1158_1  | 2   | 0.1372 | 0.89820314 | 0.1233 | 0 | 0 | 0 | 1 Ref      |
| MH744419 | Unassigned | Unassigned | Unassigned | 1074_0 | Clustered           | 19 VC_1074_0 | 19  | 0.9198 | 1          | 0.9198 | 0 | 0 | 0 | 1 Ref      |
| MH744420 | Unassigned | Unassigned | Unassigned | 588_0  | Clustered           | 2 VC_588_0   | 2   | 0.0832 | 0.94395095 | 0.0785 | 0 | 0 | 0 | 1 Ref      |
| MH744421 | Unassigned | Unassigned | Unassigned | 1160_0 | Clustered           | 73 VC_1160_0 | 73  | 0.9835 | 1          | 0.9835 | 0 | 0 | 0 | 1 Ref      |
| MH744422 | Unassigned | Unassigned | Unassigned | 558_52 | Clustered/Singleton | 1 VC_558_52  | 1   | 0      | 1          | 0      | 0 | 0 | 0 | 1 Ref      |
| MH744423 | Unassigned | Unassigned | Unassigned | 372_2  | Clustered           | 5 VC_372_2   | 5   | 0.072  | 0.99999997 | 0.072  | 0 | 0 | 0 | 0.9 Ref    |
| MH744424 | Unassigned | Unassigned | Unassigned | 767_0  | Clustered           | 34 VC_767_0  | 34  | 0.9173 | 1          | 0.9173 | 0 | 0 | 0 | 1 Ref      |
| MH744425 | Unassigned | Unassigned | Unassigned | 887_0  | Clustered           | 18 VC_887_0  | 18  | 0.3663 | 1          | 0.3663 | 0 | 0 | 0 | 1 Ref      |
| MH746814 | Unassigned | Unassigned | Unassigned | 700_0  | Clustered           | 10 VC_700_0  | 10  | 0.8076 | 1          | 0.8076 | 0 | 0 | 0 | 1 Ref      |
| MH746817 | Unassigned | Unassigned | Unassigned | 171_0  | Clustered           | 8 VC_171_0   | 8   | 0.5884 | 1          | 0.5884 | 0 | 0 | 0 | 1 Ref      |
| MH751506 | Unassigned | Unassigned | Unassigned | 283_92 | Clustered           | 4 VC_283_92  | 4   | 0.0079 | 0.9999582  | 0.0079 | 0 | 0 | 0 | 1 Ref      |
| MH752385 | Unassigned | Unassigned | Unassigned | 104_0  | Clustered           | 6 VC_104_0   | 6   | 0.8291 | 1          | 0.8291 | 0 | 0 | 0 | 1 Ref      |
| MH752840 | Unassigned | Unassigned | Unassigned | 772_11 | Clustered           | 6 VC_772_11  | 6   | 0.0305 | 0.84253803 | 0.0257 | 0 | 0 | 0 | 0.8 Ref    |
| MH763831 | Unassigned | Unassigned | Unassigned | 699_0  | Clustered           | 71 VC_699_0  | 71  | 0.9352 | 1          | 0.9352 | 0 | 0 | 0 | 1 Ref      |
| MH779498 | Unassigned | Unassigned | Unassigned | 558_49 | Clustered           | 7 VC_558_49  | 7   | 0.0194 | 0.99510369 | 0.0193 | 0 | 0 | 0 | 0.8571 Ref |
| MH779499 | Unassigned | Unassigned | Unassigned | 767_0  | Clustered           | 34 VC_767_0  | 34  | 0.9173 | 1          | 0.9173 | 0 | 0 | 0 | 1 Ref      |
| MH779500 | Unassigned | Unassigned | Unassigned | 371_3  | Clustered           | 22 VC_371_3  | 22  | 0.0787 | 1          | 0.0787 | 0 | 0 | 0 | 0.9048 Ref |
| MH779501 | Unassigned | Unassigned | Unassigned | 767_0  | Clustered           | 34 VC_767_0  | 34  | 0.9173 | 1          | 0.9173 | 0 | 0 | 0 | 1 Ref      |
| MH779502 | Unassigned | Unassigned | Unassigned | 558_54 | Clustered/Singleton | 1 VC_558_54  | 1   | 0      | 1          | 0      | 0 | 0 | 0 | 1 Ref      |
| MH779503 | Unassigned | Unassigned | Unassigned | 551_6  | Clustered           | 22 VC_551_6  | 22  | 0.1214 | 1          | 0.1214 | 0 | 0 | 0 | 0.8095 Ref |
| MH779504 | Unassigned | Unassigned | Unassigned | 557_1  | Clustered           | 11 VC_557_1  | 11  | 0.4945 | 1          | 0.4945 | 0 | 0 | 0 | 0.7818 Ref |
| MH779505 | Unassigned | Unassigned | Unassigned | 761_0  | Clustered           | 67 VC_761_0  | 67  | 0.8947 | 1          | 0.8947 | 0 | 0 | 0 | 1 Ref      |
| MH779506 | Unassigned | Unassigned | Unassigned | 950_0  | Clustered           | 38 VC_950_0  | 38  | 0.9443 | 1          | 0.9443 | 0 | 0 | 0 | 1 Ref      |
| MH779507 | Unassigned | Unassigned | Unassigned | 761_0  | Clustered           | 67 VC_761_0  | 67  | 0.8947 | 1          | 0.8947 | 0 | 0 | 0 | 1 Ref      |
| MH779508 | Unassigned | Unassigned | Unassigned | 767_0  | Clustered           | 34 VC_767_0  | 34  | 0.9173 | 1          | 0.9173 | 0 | 0 | 0 | 1 Ref      |
| MH779509 | Unassigned | Unassigned | Unassigned | 761_0  | Clustered           | 67 VC_761_0  | 67  | 0.8947 | 1          | 0.8947 | 0 | 0 | 0 | 1 Ref      |
| MH779510 | Unassigned | Unassigned | Unassigned | 767_0  | Clustered           | 34 VC_767_0  | 34  | 0.9173 | 1          | 0.9173 | 0 | 0 | 0 | 1 Ref      |
| MH779511 | Unassigned | Unassigned | Unassigned | 888_0  | Clustered           | 28 VC_888_0  | 28  | 0.5497 | 1          | 0.5497 | 0 | 0 | 0 | 1 Ref      |
| MH779512 | Unassigned | Unassigned | Unassigned | 1344_0 | Clustered           | 78 VC_1344_0 | 78  | 0.9732 | 1          | 0.9732 | 0 | 0 | 0 | 1 Ref      |
| MH779513 | Unassigned | Unassigned | Unassigned | 761_0  | Clustered           | 67 VC_761_0  | 67  | 0.8947 | 1          | 0.8947 | 0 | 0 | 0 | 1 Ref      |
| MH779514 | Unassigned | Unassigned | Unassigned | 761_0  | Clustered           | 67 VC_761_0  | 67  | 0.8947 | 1          | 0.8947 | 0 | 0 | 0 | 1 Ref      |
| MH779515 | Unassigned | Unassigned | Unassigned | 761_0  | Clustered           | 67 VC_761_0  | 67  | 0.8947 | 1          | 0.8947 | 0 | 0 | 0 | 1 Ref      |
| MH779516 | Unassigned | Unassigned | Unassigned | 371_16 | Clustered           | 42 VC_371_16 | 42  | 0.1341 | 1          | 0.1341 | 0 | 0 | 0 | 0.7282 Ref |



|          |            |            |            |        |                     |              |     |        |            |        |   |   |   |            |
|----------|------------|------------|------------|--------|---------------------|--------------|-----|--------|------------|--------|---|---|---|------------|
| MH779517 | Unassigned | Unassigned | Unassigned | 223_0  | Clustered           | 38 VC_223_0  | 38  | 0.9095 | 1          | 0.9095 | 0 | 0 | 0 | 1 Ref      |
| MH779518 | Unassigned | Unassigned | Unassigned | 690_0  | Clustered           | 50 VC_690_0  | 50  | 0.9805 | 1          | 0.9805 | 0 | 0 | 0 | 1 Ref      |
| MH779519 | Unassigned | Unassigned | Unassigned | 690_0  | Clustered           | 50 VC_690_0  | 50  | 0.9805 | 1          | 0.9805 | 0 | 0 | 0 | 1 Ref      |
| MH779520 | Unassigned | Unassigned | Unassigned | 690_0  | Clustered           | 50 VC_690_0  | 50  | 0.9805 | 1          | 0.9805 | 0 | 0 | 0 | 1 Ref      |
| MH779521 | Unassigned | Unassigned | Unassigned | 690_0  | Clustered           | 50 VC_690_0  | 50  | 0.9805 | 1          | 0.9805 | 0 | 0 | 0 | 1 Ref      |
| MH779522 | Unassigned | Unassigned | Unassigned | 690_0  | Clustered           | 50 VC_690_0  | 50  | 0.9805 | 1          | 0.9805 | 0 | 0 | 0 | 1 Ref      |
| MH779523 | Unassigned | Unassigned | Unassigned | 690_0  | Clustered           | 50 VC_690_0  | 50  | 0.9805 | 1          | 0.9805 | 0 | 0 | 0 | 1 Ref      |
| MH779524 | Unassigned | Unassigned | Unassigned | 690_0  | Clustered           | 50 VC_690_0  | 50  | 0.9805 | 1          | 0.9805 | 0 | 0 | 0 | 1 Ref      |
| MH779525 | Unassigned | Unassigned | Unassigned | 690_0  | Clustered           | 50 VC_690_0  | 50  | 0.9805 | 1          | 0.9805 | 0 | 0 | 0 | 1 Ref      |
| MH779526 | Unassigned | Unassigned | Unassigned | 690_0  | Clustered           | 50 VC_690_0  | 50  | 0.9805 | 1          | 0.9805 | 0 | 0 | 0 | 1 Ref      |
| MH779527 | Unassigned | Unassigned | Unassigned | 690_0  | Clustered           | 50 VC_690_0  | 50  | 0.9805 | 1          | 0.9805 | 0 | 0 | 0 | 1 Ref      |
| MH779619 | Unassigned | Unassigned | Unassigned | 392_0  | Clustered           | 126 VC_392_0 | 126 | 0.9621 | 1          | 0.9621 | 0 | 0 | 0 | 1 Ref      |
| MH791395 | Unassigned | Unassigned | Unassigned | 592_0  | Clustered           | 50 VC_592_0  | 50  | 0.7314 | 1          | 0.7314 | 0 | 0 | 0 | 1 Ref      |
| MH791396 | Unassigned | Unassigned | Unassigned | 592_0  | Clustered           | 50 VC_592_0  | 50  | 0.7314 | 1          | 0.7314 | 0 | 0 | 0 | 1 Ref      |
| MH791397 | Unassigned | Unassigned | Unassigned | 92_0   | Clustered           | 22 VC_92_0   | 22  | 0.5639 | 1          | 0.5639 | 0 | 0 | 0 | 1 Ref      |
| MH791398 | Unassigned | Unassigned | Unassigned | 443_2  | Clustered           | 10 VC_443_2  | 10  | 0.3344 | 1          | 0.3344 | 0 | 0 | 0 | 0.9333 Ref |
| MH791399 | Unassigned | Unassigned | Unassigned | 76_0   | Clustered           | 37 VC_76_0   | 37  | 0.9403 | 1          | 0.9403 | 0 | 0 | 0 | 1 Ref      |
| MH791400 | Unassigned | Unassigned | Unassigned | 330_0  | Clustered           | 27 VC_330_0  | 27  | 0.5088 | 1          | 0.5088 | 0 | 0 | 0 | 0.8661 Ref |
| MH791402 | Unassigned | Unassigned | Unassigned | 461_0  | Clustered           | 96 VC_461_0  | 96  | 0.9307 | 1          | 0.9307 | 0 | 0 | 0 | 0.9575 Ref |
| MH791403 | Unassigned | Unassigned | Unassigned | 166_0  | Clustered           | 26 VC_166_0  | 26  | 0.7923 | 1          | 0.7923 | 0 | 0 | 0 | 1 Ref      |
| MH791404 | Unassigned | Unassigned | Unassigned | 443_2  | Clustered           | 10 VC_443_2  | 10  | 0.3344 | 1          | 0.3344 | 0 | 0 | 0 | 0.9333 Ref |
| MH791405 | Unassigned | Unassigned | Unassigned | 133_6  | Clustered/Singleton | 1 VC_133_6   | 1   | 0      | 1          | 0      | 0 | 0 | 0 | 1 Ref      |
| MH791406 | Unassigned | Unassigned | Unassigned | 166_0  | Clustered           | 26 VC_166_0  | 26  | 0.7923 | 1          | 0.7923 | 0 | 0 | 0 | 1 Ref      |
| MH791408 | Unassigned | Unassigned | Unassigned | 76_0   | Clustered           | 37 VC_76_0   | 37  | 0.9403 | 1          | 0.9403 | 0 | 0 | 0 | 1 Ref      |
| MH791409 | Unassigned | Unassigned | Unassigned | 290_6  | Clustered           | 12 VC_290_6  | 12  | 0.1149 | 1          | 0.1149 | 0 | 0 | 0 | 0.8182 Ref |
| MH791410 | Unassigned | Unassigned | Unassigned | 461_0  | Clustered           | 96 VC_461_0  | 96  | 0.9307 | 1          | 0.9307 | 0 | 0 | 0 | 0.9575 Ref |
| MH791411 | Unassigned | Unassigned | Unassigned | 164_11 | Clustered           | 10 VC_164_11 | 10  | 0.1507 | 1          | 0.1507 | 0 | 0 | 0 | 0.9111 Ref |
| MH791412 | Unassigned | Unassigned | Unassigned | 461_0  | Clustered           | 96 VC_461_0  | 96  | 0.9307 | 1          | 0.9307 | 0 | 0 | 0 | 0.9575 Ref |
| MH791413 | Unassigned | Unassigned | Unassigned | 330_0  | Clustered           | 27 VC_330_0  | 27  | 0.5088 | 1          | 0.5088 | 0 | 0 | 0 | 0.8661 Ref |
| MH791414 | Unassigned | Unassigned | Unassigned | 443_0  | Clustered           | 2 VC_443_0   | 2   | 0.029  | 0.87409603 | 0.0253 | 0 | 0 | 0 | 1 Ref      |
| MH791415 | Unassigned | Unassigned | Unassigned | 108_0  | Clustered           | 33 VC_108_0  | 33  | 0.949  | 1          | 0.949  | 0 | 0 | 0 | 1 Ref      |
| MH791416 | Unassigned | Unassigned | Unassigned | 76_0   | Clustered           | 37 VC_76_0   | 37  | 0.9403 | 1          | 0.9403 | 0 | 0 | 0 | 1 Ref      |
| MH800198 | Unassigned | Unassigned | Unassigned | 700_0  | Clustered           | 10 VC_700_0  | 10  | 0.8076 | 1          | 0.8076 | 0 | 0 | 0 | 1 Ref      |
| MH800199 | Unassigned | Unassigned | Unassigned | 700_0  | Clustered           | 10 VC_700_0  | 10  | 0.8076 | 1          | 0.8076 | 0 | 0 | 0 | 1 Ref      |
| MH800200 | Unassigned | Unassigned | Unassigned | 699_0  | Clustered           | 71 VC_699_0  | 71  | 0.9352 | 1          | 0.9352 | 0 | 0 | 0 | 1 Ref      |
| MH807810 | Unassigned | Unassigned | Unassigned | 458_0  | Clustered           | 5 VC_458_0   | 5   | 0.1938 | 0.99999997 | 0.1938 | 0 | 0 | 0 | 1 Ref      |
| MH807811 | Unassigned | Unassigned | Unassigned | 984_0  | Clustered           | 38 VC_984_0  | 38  | 0.9758 | 1          | 0.9758 | 0 | 0 | 0 | 1 Ref      |
| MH807812 | Unassigned | Unassigned | Unassigned | 131_0  | Clustered           | 17 VC_131_0  | 17  | 0.2671 | 1          | 0.2671 | 0 | 0 | 0 | 1 Ref      |
| MH807813 | Unassigned | Unassigned | Unassigned | 458_0  | Clustered           | 5 VC_458_0   | 5   | 0.1938 | 0.99999997 | 0.1938 | 0 | 0 | 0 | 1 Ref      |
| MH807814 | Unassigned | Unassigned | Unassigned | 984_0  | Clustered           | 38 VC_984_0  | 38  | 0.9758 | 1          | 0.9758 | 0 | 0 | 0 | 1 Ref      |
| MH807815 | Unassigned | Unassigned | Unassigned | 458_0  | Clustered           | 5 VC_458_0   | 5   | 0.1938 | 0.99999997 | 0.1938 | 0 | 0 | 0 | 1 Ref      |
| MH807816 | Unassigned | Unassigned | Unassigned | 984_0  | Clustered           | 38 VC_984_0  | 38  | 0.9758 | 1          | 0.9758 | 0 | 0 | 0 | 1 Ref      |
| MH807817 | Unassigned | Unassigned | Unassigned | 458_0  | Clustered           | 5 VC_458_0   | 5   | 0.1938 | 0.99999997 | 0.1938 | 0 | 0 | 0 | 1 Ref      |
| MH807818 | Unassigned | Unassigned | Unassigned | 984_0  | Clustered           | 38 VC_984_0  | 38  | 0.9758 | 1          | 0.9758 | 0 | 0 | 0 | 1 Ref      |
| MH807819 | Unassigned | Unassigned | Unassigned | 984_0  | Clustered           | 38 VC_984_0  | 38  | 0.9758 | 1          | 0.9758 | 0 | 0 | 0 | 1 Ref      |
| MH807820 | Unassigned | Unassigned | Unassigned | 131_0  | Clustered           | 17 VC_131_0  | 17  | 0.2671 | 1          | 0.2671 | 0 | 0 | 0 | 1 Ref      |
| MH809528 | Unassigned | Unassigned | Unassigned | 577_0  | Clustered           | 6 VC_577_0   | 6   | 0.9267 | 0.99999993 | 0.9267 | 0 | 0 | 0 | 1 Ref      |
| MH809529 | Unassigned | Unassigned | Unassigned | 526_0  | Clustered           | 6 VC_526_0   | 6   | 0.4386 | 1          | 0.4386 | 0 | 0 | 0 | 1 Ref      |
| MH809530 | Unassigned | Unassigned | Unassigned | 526_0  | Clustered           | 6 VC_526_0   | 6   | 0.4386 | 1          | 0.4386 | 0 | 0 | 0 | 1 Ref      |
| MH809531 | Unassigned | Unassigned | Unassigned | 526_0  | Clustered           | 6 VC_526_0   | 6   | 0.4386 | 1          | 0.4386 | 0 | 0 | 0 | 1 Ref      |
| MH809534 | Unassigned | Unassigned | Unassigned | 386_0  | Clustered           | 49 VC_386_0  | 49  | 0.7941 | 1          | 0.7941 | 0 | 0 | 0 | 1 Ref      |
| MH809535 | Unassigned | Unassigned | Unassigned | 283_34 | Clustered           | 4 VC_283_34  | 4   | 0.0082 | 0.9997481  | 0.0082 | 0 | 0 | 0 | 1 Ref      |
| MH816848 | Unassigned | Unassigned | Unassigned | 848_0  | Clustered           | 28 VC_848_0  | 28  | 0.7927 | 1          | 0.7927 | 0 | 0 | 0 | 1 Ref      |
| MH816966 | Unassigned | Unassigned | Unassigned | 618_0  | Clustered           | 13 VC_618_0  | 13  | 0.6252 | 1          | 0.6252 | 0 | 0 | 0 | 1 Ref      |
| MH817022 | Unassigned | Unassigned | Unassigned | 818_0  | Clustered           | 20 VC_818_0  | 20  | 0.9601 | 1          | 0.9601 | 0 | 0 | 0 | 1 Ref      |
| MH823906 | Unassigned | Unassigned | Unassigned | 669_0  | Clustered           | 21 VC_669_0  | 21  | 0.3623 | 1          | 0.3623 | 0 | 0 | 0 | 1 Ref      |
| MH825697 | Unassigned | Unassigned | Unassigned | 558_12 | Clustered           | 3 VC_558_12  | 3   | 0.0064 | 0.87854253 | 0.0057 | 0 | 0 | 0 | 1 Ref      |
| MH825698 | Unassigned | Unassigned | Unassigned | 1361_0 | Clustered           | 6 VC_1361_0  | 6   | 0.2371 | 1          | 0.2371 | 0 | 0 | 0 | 1 Ref      |
| MH825699 | Unassigned | Unassigned | Unassigned | 727_0  | Clustered           | 11 VC_727_0  | 11  | 0.5054 | 1          | 0.5054 | 0 | 0 | 0 | 1 Ref      |
| MH825700 | Unassigned | Unassigned | Unassigned | 1344_0 | Clustered           | 78 VC_1344_0 | 78  | 0.9732 | 1          | 0.9732 | 0 | 0 | 0 | 1 Ref      |
| MH825701 | Unassigned | Unassigned | Unassigned | 216_4  | Clustered           | 13 VC_216_4  | 13  | 0.1657 | 1          | 0.1657 | 0 | 0 | 0 | 1 Ref      |
| MH825702 | Unassigned | Unassigned | Unassigned | 371_15 | Clustered           | 44 VC_371_15 | 44  | 0.1391 | 1          | 0.1391 | 0 | 0 | 0 | 0.7474 Ref |
| MH825703 | Unassigned | Unassigned | Unassigned | 1073_0 | Clustered           | 24 VC_1073_0 | 24  | 0.8388 | 1          | 0.8388 | 0 | 0 | 0 | 1 Ref      |
| MH825704 | Unassigned | Unassigned | Unassigned | 216_6  | Clustered           | 42 VC_216_6  | 42  | 0.473  | 1          | 0.473  | 0 | 0 | 0 | 0.8351 Ref |
| MH825705 | Unassigned | Unassigned | Unassigned | 371_15 | Clustered           | 44 VC_371_15 | 44  | 0.1391 | 1          | 0.1391 | 0 | 0 | 0 | 0.7474 Ref |
| MH825706 | Unassigned | Unassigned | Unassigned | 1353_0 | Clustered           | 10 VC_1353_0 | 10  | 1      | 1          | 1      | 0 | 0 | 0 | 1 Ref      |
| MH825707 | Unassigned | Unassigned | Unassigned | 520_30 | Clustered           | 2 VC_520_30  | 2   | 0.0073 | 0.9544492  | 0.0069 | 0 | 0 | 0 | 1 Ref      |
| MH825709 | Unassigned | Unassigned | Unassigned | 216_3  | Clustered           | 8 VC_216_3   | 8   | 0.0701 | 1          | 0.0701 | 0 | 0 | 0 | 0.8571 Ref |
| MH825710 | Unassigned | Unassigned | Unassigned | 517_1  | Clustered           | 108 VC_517_1 | 108 | 0.8483 | 1          | 0.8483 | 0 | 0 | 0 | 0.9955 Ref |
| MH825711 | Unassigned | Unassigned | Unassigned | 1164_0 | Clustered           | 25 VC_1164_0 | 25  | 0.7312 | 1          | 0.7312 | 0 | 0 | 0 | 1 Ref      |
| MH825713 | Unassigned | Unassigned | Unassigned | 558_50 | Clustered           | 15 VC_558_50 | 15  | 0.0468 | 1          | 0.0468 | 0 | 0 | 0 | 0.9238 Ref |
| MH834594 | Unassigned | Unassigned | Unassigned | 951_0  | Clustered           | 3 VC_951_0   | 3   | 0.1049 | 0.99921864 | 0.1048 | 0 | 0 | 0 | 1 Ref      |
| MH834595 | Unassigned | Unassigned | Unassigned | 1166_0 | Clustered           | 20 VC_1166_0 | 20  | 0.99   | 1          | 0.99   | 0 | 0 | 0 | 1 Ref      |
| MH834596 | Unassigned | Unassigned | Unassigned | 1234_0 | Clustered           | 44 VC_1234_0 | 44  | 1      | 1          | 1      | 0 | 0 | 0 | 1 Ref      |
| MH834597 | Unassigned | Unassigned | Unassigned | 951_0  | Clustered           | 3 VC_951_0   | 3   | 0.1049 | 0.99921864 | 0.1048 | 0 | 0 | 0 | 1 Ref      |
| MH834598 | Unassigned | Unassigned | Unassigned | 1036_0 | Clustered           | 11 VC_1036_0 | 11  | 0.656  | 1          | 0.656  | 0 | 0 | 0 | 0.8727 Ref |
| MH834599 | Unassigned | Unassigned | Unassigned | 1234_0 | Clustered           | 44 VC_1234_0 | 44  | 1      | 1          | 1      | 0 | 0 | 0 | 1 Ref      |
| MH834600 | Unassigned | Unassigned | Unassigned | 888_0  | Clustered           | 28 VC_888_0  | 28  | 0.5497 | 1          | 0.5497 | 0 | 0 | 0 | 1 Ref      |
| MH834602 | Unassigned | Unassigned | Unassigned | 1234_0 | Clustered           | 44 VC_1234_0 | 44  | 1      | 1          | 1      | 0 | 0 | 0 | 1 Ref      |
| MH834603 | Unassigned | Unassigned | Unassigned | 1035_0 | Clustered           | 6 VC_1035_0  | 6   | 0.4854 | 1          | 0.4854 | 0 | 0 | 0 | 1 Ref      |
| MH834604 | Unassigned | Unassigned | Unassigned | 1234_0 | Clustered           | 44 VC_1234_0 | 44  | 1      | 1          | 1      | 0 | 0 | 0 | 1 Ref      |



|          |            |            |            |         |                     |              |     |        |            |        |   |   |   |            |
|----------|------------|------------|------------|---------|---------------------|--------------|-----|--------|------------|--------|---|---|---|------------|
| MH834605 | Unassigned | Unassigned | Unassigned | 1035_0  | Clustered           | 6 VC_1035_0  | 6   | 0.4854 | 1          | 0.4854 | 0 | 0 | 0 | 1 Ref      |
| MH834606 | Unassigned | Unassigned | Unassigned | 1166_0  | Clustered           | 20 VC_1166_0 | 20  | 0.99   | 1          | 0.99   | 0 | 0 | 0 | 1 Ref      |
| MH834607 | Unassigned | Unassigned | Unassigned | 1362_0  | Clustered           | 6 VC_1362_0  | 6   | 1      | 1          | 1      | 0 | 0 | 0 | 1 Ref      |
| MH834608 | Unassigned | Unassigned | Unassigned | 1166_0  | Clustered           | 20 VC_1166_0 | 20  | 0.99   | 1          | 0.99   | 0 | 0 | 0 | 1 Ref      |
| MH834609 | Unassigned | Unassigned | Unassigned | 1166_0  | Clustered           | 20 VC_1166_0 | 20  | 0.99   | 1          | 0.99   | 0 | 0 | 0 | 1 Ref      |
| MH834610 | Unassigned | Unassigned | Unassigned | 1207_0  | Clustered           | 29 VC_1207_0 | 29  | 0.8225 | 1          | 0.8225 | 0 | 0 | 0 | 1 Ref      |
| MH834611 | Unassigned | Unassigned | Unassigned | 1035_0  | Clustered           | 6 VC_1035_0  | 6   | 0.4854 | 1          | 0.4854 | 0 | 0 | 0 | 1 Ref      |
| MH834612 | Unassigned | Unassigned | Unassigned | 1036_0  | Clustered           | 11 VC_1036_0 | 11  | 0.656  | 1          | 0.656  | 0 | 0 | 0 | 0.8727 Ref |
| MH834613 | Unassigned | Unassigned | Unassigned | 571_0   | Clustered           | 4 VC_571_0   | 4   | 0.1921 | 0.99998591 | 0.1921 | 0 | 0 | 0 | 1 Ref      |
| MH834614 | Unassigned | Unassigned | Unassigned | 1035_0  | Clustered           | 6 VC_1035_0  | 6   | 0.4854 | 1          | 0.4854 | 0 | 0 | 0 | 1 Ref      |
| MH834615 | Unassigned | Unassigned | Unassigned | 565_0   | Clustered           | 20 VC_565_0  | 20  | 0.8398 | 1          | 0.8398 | 0 | 0 | 0 | 1 Ref      |
| MH834616 | Unassigned | Unassigned | Unassigned | 1166_0  | Clustered           | 20 VC_1166_0 | 20  | 0.99   | 1          | 0.99   | 0 | 0 | 0 | 1 Ref      |
| MH834617 | Unassigned | Unassigned | Unassigned | 520_45  | Clustered           | 7 VC_520_45  | 7   | 0.0635 | 1          | 0.0635 | 0 | 0 | 0 | 0.8095 Ref |
| MH834618 | Unassigned | Unassigned | Unassigned | 1166_0  | Clustered           | 20 VC_1166_0 | 20  | 0.99   | 1          | 0.99   | 0 | 0 | 0 | 1 Ref      |
| MH834619 | Unassigned | Unassigned | Unassigned | 1207_0  | Clustered           | 29 VC_1207_0 | 29  | 0.8225 | 1          | 0.8225 | 0 | 0 | 0 | 1 Ref      |
| MH834620 | Unassigned | Unassigned | Unassigned | 1166_0  | Clustered           | 20 VC_1166_0 | 20  | 0.99   | 1          | 0.99   | 0 | 0 | 0 | 1 Ref      |
| MH834621 | Unassigned | Unassigned | Unassigned | 1037_0  | Clustered           | 6 VC_1037_0  | 6   | 0.6798 | 1          | 0.6798 | 0 | 0 | 0 | 1 Ref      |
| MH834622 | Unassigned | Unassigned | Unassigned | 1362_0  | Clustered           | 6 VC_1362_0  | 6   | 1      | 1          | 1      | 0 | 0 | 0 | 1 Ref      |
| MH834623 | Unassigned | Unassigned | Unassigned | 1035_0  | Clustered           | 6 VC_1035_0  | 6   | 0.4854 | 1          | 0.4854 | 0 | 0 | 0 | 1 Ref      |
| MH834624 | Unassigned | Unassigned | Unassigned | 1166_0  | Clustered           | 20 VC_1166_0 | 20  | 0.99   | 1          | 0.99   | 0 | 0 | 0 | 1 Ref      |
| MH834625 | Unassigned | Unassigned | Unassigned | 1036_0  | Clustered           | 11 VC_1036_0 | 11  | 0.656  | 1          | 0.656  | 0 | 0 | 0 | 0.8727 Ref |
| MH834626 | Unassigned | Unassigned | Unassigned | 1234_0  | Clustered           | 44 VC_1234_0 | 44  | 1      | 1          | 1      | 0 | 0 | 0 | 1 Ref      |
| MH834627 | Unassigned | Unassigned | Unassigned | 1037_0  | Clustered           | 6 VC_1037_0  | 6   | 0.6798 | 1          | 0.6798 | 0 | 0 | 0 | 1 Ref      |
| MH834628 | Unassigned | Unassigned | Unassigned | 951_0   | Clustered           | 3 VC_951_0   | 3   | 0.1049 | 0.99921864 | 0.1048 | 0 | 0 | 0 | 1 Ref      |
| MH834629 | Unassigned | Unassigned | Unassigned | 1207_0  | Clustered           | 29 VC_1207_0 | 29  | 0.8225 | 1          | 0.8225 | 0 | 0 | 0 | 1 Ref      |
| MH837542 | Unassigned | Unassigned | Unassigned | 302_0   | Clustered           | 2 VC_302_0   | 2   | 0.1917 | 0.94974203 | 0.182  | 0 | 0 | 0 | 1 Ref      |
| MH837543 | Unassigned | Unassigned | Unassigned | 302_0   | Clustered           | 2 VC_302_0   | 2   | 0.1917 | 0.94974203 | 0.182  | 0 | 0 | 0 | 1 Ref      |
| MH837626 | Unassigned | Unassigned | Unassigned | 283_159 | Clustered/Singleton | 1 VC_283_159 | 1   | 0      | 1          | 0      | 0 | 0 | 0 | 1 Ref      |
| MH844528 | Unassigned | Unassigned | Unassigned | 149_8   | Clustered           | 66 VC_149_8  | 66  | 0.4565 | 1          | 0.4565 | 0 | 0 | 0 | 0.8182 Ref |
| MH844529 | Unassigned | Unassigned | Unassigned | 149_8   | Clustered           | 66 VC_149_8  | 66  | 0.4565 | 1          | 0.4565 | 0 | 0 | 0 | 0.8182 Ref |
| MH844531 | Unassigned | Unassigned | Unassigned | 938_0   | Clustered           | 99 VC_938_0  | 99  | 0.9119 | 1          | 0.9119 | 0 | 0 | 0 | 0.9928 Ref |
| MH853786 | Unassigned | Unassigned | Unassigned | 698_0   | Clustered           | 26 VC_698_0  | 26  | 0.9366 | 1          | 0.9366 | 0 | 0 | 0 | 1 Ref      |
| MH853787 | Unassigned | Unassigned | Unassigned | 698_0   | Clustered           | 26 VC_698_0  | 26  | 0.9366 | 1          | 0.9366 | 0 | 0 | 0 | 1 Ref      |
| MH853788 | Unassigned | Unassigned | Unassigned | 698_0   | Clustered           | 26 VC_698_0  | 26  | 0.9366 | 1          | 0.9366 | 0 | 0 | 0 | 1 Ref      |
| MH880817 | Unassigned | Unassigned | Unassigned | 92_0    | Clustered           | 22 VC_92_0   | 22  | 0.5639 | 1          | 0.5639 | 0 | 0 | 0 | 1 Ref      |
| MH884508 | Unassigned | Unassigned | Unassigned | 475_4   | Clustered/Singleton | 1 VC_475_4   | 1   | 0      | 1          | 0      | 0 | 0 | 0 | 1 Ref      |
| MH884511 | Unassigned | Unassigned | Unassigned | 87_2    | Clustered/Singleton | 1 VC_87_2    | 1   | 0      | 1          | 0      | 0 | 0 | 0 | 1 Ref      |
| MH884512 | Unassigned | Unassigned | Unassigned | 622_0   | Clustered           | 2 VC_622_0   | 2   | 0.0507 | 0.6259393  | 0.0317 | 0 | 0 | 0 | 1 Ref      |
| MH884513 | Unassigned | Unassigned | Unassigned | 100_0   | Clustered           | 15 VC_100_0  | 15  | 0.6536 | 1          | 0.6536 | 0 | 0 | 0 | 1 Ref      |
| MH884514 | Unassigned | Unassigned | Unassigned | 101_0   | Clustered           | 3 VC_101_0   | 3   | 0.3621 | 0.99764884 | 0.3612 | 0 | 0 | 0 | 1 Ref      |
| MH885472 | Unassigned | Unassigned | Unassigned | 111_0   | Clustered           | 91 VC_111_0  | 91  | 0.9587 | 1          | 0.9587 | 0 | 0 | 0 | 1 Ref      |
| MH892350 | Unassigned | Unassigned | Unassigned | 256_0   | Clustered           | 14 VC_256_0  | 14  | 0.2368 | 1          | 0.2368 | 0 | 0 | 0 | 1 Ref      |
| MH892351 | Unassigned | Unassigned | Unassigned | 252_0   | Clustered           | 121 VC_252_0 | 121 | 0.7376 | 1          | 0.7376 | 0 | 0 | 0 | 0.9999 Ref |
| MH892352 | Unassigned | Unassigned | Unassigned | 252_0   | Clustered           | 121 VC_252_0 | 121 | 0.7376 | 1          | 0.7376 | 0 | 0 | 0 | 0.9999 Ref |
| MH892353 | Unassigned | Unassigned | Unassigned | 252_0   | Clustered           | 121 VC_252_0 | 121 | 0.7376 | 1          | 0.7376 | 0 | 0 | 0 | 0.9999 Ref |
| MH892354 | Unassigned | Unassigned | Unassigned | 252_0   | Clustered           | 121 VC_252_0 | 121 | 0.7376 | 1          | 0.7376 | 0 | 0 | 0 | 0.9999 Ref |
| MH892355 | Unassigned | Unassigned | Unassigned | 255_0   | Clustered           | 13 VC_255_0  | 13  | 0.2048 | 1          | 0.2048 | 0 | 0 | 0 | 1 Ref      |
| MH892356 | Unassigned | Unassigned | Unassigned | 252_0   | Clustered           | 121 VC_252_0 | 121 | 0.7376 | 1          | 0.7376 | 0 | 0 | 0 | 0.9999 Ref |
| MH892357 | Unassigned | Unassigned | Unassigned | 252_0   | Clustered           | 121 VC_252_0 | 121 | 0.7376 | 1          | 0.7376 | 0 | 0 | 0 | 0.9999 Ref |
| MH892358 | Unassigned | Unassigned | Unassigned | 252_0   | Clustered           | 121 VC_252_0 | 121 | 0.7376 | 1          | 0.7376 | 0 | 0 | 0 | 0.9999 Ref |
| MH892359 | Unassigned | Unassigned | Unassigned | 252_0   | Clustered           | 121 VC_252_0 | 121 | 0.7376 | 1          | 0.7376 | 0 | 0 | 0 | 0.9999 Ref |
| MH892360 | Unassigned | Unassigned | Unassigned | 252_0   | Clustered           | 121 VC_252_0 | 121 | 0.7376 | 1          | 0.7376 | 0 | 0 | 0 | 0.9999 Ref |
| MH892361 | Unassigned | Unassigned | Unassigned | 252_0   | Clustered           | 121 VC_252_0 | 121 | 0.7376 | 1          | 0.7376 | 0 | 0 | 0 | 0.9999 Ref |
| MH892362 | Unassigned | Unassigned | Unassigned | 254_0   | Clustered           | 46 VC_254_0  | 46  | 0.5159 | 1          | 0.5159 | 0 | 0 | 0 | 1 Ref      |
| MH892363 | Unassigned | Unassigned | Unassigned | 254_0   | Clustered           | 46 VC_254_0  | 46  | 0.5159 | 1          | 0.5159 | 0 | 0 | 0 | 1 Ref      |
| MH892364 | Unassigned | Unassigned | Unassigned | 254_0   | Clustered           | 46 VC_254_0  | 46  | 0.5159 | 1          | 0.5159 | 0 | 0 | 0 | 1 Ref      |
| MH892365 | Unassigned | Unassigned | Unassigned | 256_0   | Clustered           | 14 VC_256_0  | 14  | 0.2368 | 1          | 0.2368 | 0 | 0 | 0 | 1 Ref      |
| MH892366 | Unassigned | Unassigned | Unassigned | 254_0   | Clustered           | 46 VC_254_0  | 46  | 0.5159 | 1          | 0.5159 | 0 | 0 | 0 | 1 Ref      |
| MH892367 | Unassigned | Unassigned | Unassigned | 255_0   | Clustered           | 13 VC_255_0  | 13  | 0.2048 | 1          | 0.2048 | 0 | 0 | 0 | 1 Ref      |
| MH892368 | Unassigned | Unassigned | Unassigned | 256_0   | Clustered           | 14 VC_256_0  | 14  | 0.2368 | 1          | 0.2368 | 0 | 0 | 0 | 1 Ref      |
| MH892369 | Unassigned | Unassigned | Unassigned | 256_0   | Clustered           | 14 VC_256_0  | 14  | 0.2368 | 1          | 0.2368 | 0 | 0 | 0 | 1 Ref      |
| MH892370 | Unassigned | Unassigned | Unassigned | 256_0   | Clustered           | 14 VC_256_0  | 14  | 0.2368 | 1          | 0.2368 | 0 | 0 | 0 | 1 Ref      |
| MH892371 | Unassigned | Unassigned | Unassigned | 256_0   | Clustered           | 14 VC_256_0  | 14  | 0.2368 | 1          | 0.2368 | 0 | 0 | 0 | 1 Ref      |
| MH892372 | Unassigned | Unassigned | Unassigned | 256_0   | Clustered           | 14 VC_256_0  | 14  | 0.2368 | 1          | 0.2368 | 0 | 0 | 0 | 1 Ref      |
| MH892373 | Unassigned | Unassigned | Unassigned | 255_0   | Clustered           | 13 VC_255_0  | 13  | 0.2048 | 1          | 0.2048 | 0 | 0 | 0 | 1 Ref      |
| MH892374 | Unassigned | Unassigned | Unassigned | 256_0   | Clustered           | 14 VC_256_0  | 14  | 0.2368 | 1          | 0.2368 | 0 | 0 | 0 | 1 Ref      |
| MH892375 | Unassigned | Unassigned | Unassigned | 252_0   | Clustered           | 121 VC_252_0 | 121 | 0.7376 | 1          | 0.7376 | 0 | 0 | 0 | 0.9999 Ref |
| MH892376 | Unassigned | Unassigned | Unassigned | 254_0   | Clustered           | 46 VC_254_0  | 46  | 0.5159 | 1          | 0.5159 | 0 | 0 | 0 | 1 Ref      |
| MH892377 | Unassigned | Unassigned | Unassigned | 252_0   | Clustered           | 121 VC_252_0 | 121 | 0.7376 | 1          | 0.7376 | 0 | 0 | 0 | 0.9999 Ref |
| MH892378 | Unassigned | Unassigned | Unassigned | 252_0   | Clustered           | 121 VC_252_0 | 121 | 0.7376 | 1          | 0.7376 | 0 | 0 | 0 | 0.9999 Ref |
| MH892379 | Unassigned | Unassigned | Unassigned | 252_0   | Clustered           | 121 VC_252_0 | 121 | 0.7376 | 1          | 0.7376 | 0 | 0 | 0 | 0.9999 Ref |
| MH892380 | Unassigned | Unassigned | Unassigned | 252_0   | Clustered           | 121 VC_252_0 | 121 | 0.7376 | 1          | 0.7376 | 0 | 0 | 0 | 0.9999 Ref |
| MH892381 | Unassigned | Unassigned | Unassigned | 252_0   | Clustered           | 121 VC_252_0 | 121 | 0.7376 | 1          | 0.7376 | 0 | 0 | 0 | 0.9999 Ref |
| MH892382 | Unassigned | Unassigned | Unassigned | 252_0   | Clustered           | 121 VC_252_0 | 121 | 0.7376 | 1          | 0.7376 | 0 | 0 | 0 | 0.9999 Ref |
| MH892383 | Unassigned | Unassigned | Unassigned | 254_0   | Clustered           | 46 VC_254_0  | 46  | 0.5159 | 1          | 0.5159 | 0 | 0 | 0 | 1 Ref      |
| MH892384 | Unassigned | Unassigned | Unassigned | 254_0   | Clustered           | 46 VC_254_0  | 46  | 0.5159 | 1          | 0.5159 | 0 | 0 | 0 | 1 Ref      |
| MH892385 | Unassigned | Unassigned | Unassigned | 254_0   | Clustered           | 46 VC_254_0  | 46  | 0.5159 | 1          | 0.5159 | 0 | 0 | 0 | 1 Ref      |
| MH899585 | Unassigned | Unassigned | Unassigned | 780_0   | Clustered           | 8 VC_780_0   | 8   | 0.5207 | 1          | 0.5207 | 0 | 0 | 0 | 1 Ref      |
| MH910036 | Unassigned | Unassigned | Unassigned | 1036_0  | Clustered           | 11 VC_1036_0 | 11  | 0.656  | 1          | 0.656  | 0 | 0 | 0 | 0.8727 Ref |
| MH910037 | Unassigned | Unassigned | Unassigned | 1036_0  | Clustered           | 11 VC_1036_0 | 11  | 0.656  | 1          | 0.656  | 0 | 0 | 0 | 0.8727 Ref |
| MH910038 | Unassigned | Unassigned | Unassigned | 237_3   | Clustered           | 8 VC_237_3   | 8   | 0.1092 | 1          | 0.1092 | 0 | 0 | 0 | 1 Ref      |



|          |            |            |            |        |                     |              |     |        |            |        |   |   |   |   |            |
|----------|------------|------------|------------|--------|---------------------|--------------|-----|--------|------------|--------|---|---|---|---|------------|
| MHB10039 | Unassigned | Unassigned | Unassigned | 237_3  | Clustered           | 8 VC_237_3   | 8   | 0.1092 | 1          | 0.1092 | 0 | 0 | 0 | 0 | 1 Ref      |
| MHB10040 | Unassigned | Unassigned | Unassigned | 558_33 | Clustered/Singleton | 1 VC_558_33  | 1   | 0      | 1          | 0      | 0 | 0 | 0 | 0 | 1 Ref      |
| MHB10041 | Unassigned | Unassigned | Unassigned | 1056_0 | Clustered           | 11 VC_1056_0 | 11  | 0.656  | 1          | 0.656  | 0 | 0 | 0 | 0 | 0.8727 Ref |
| MHB10042 | Unassigned | Unassigned | Unassigned | 237_3  | Clustered           | 8 VC_237_3   | 8   | 0.1092 | 1          | 0.1092 | 0 | 0 | 0 | 0 | 1 Ref      |
| MHB17278 | Unassigned | Unassigned | Unassigned | 575_0  | Clustered           | 35 VC_575_0  | 35  | 0.8815 | 1          | 0.8815 | 0 | 0 | 0 | 0 | 1 Ref      |
| MHB20362 | Unassigned | Unassigned | Unassigned | 330_0  | Clustered           | 27 VC_330_0  | 27  | 0.5088 | 1          | 0.5088 | 0 | 0 | 0 | 0 | 0.8661 Ref |
| MHB20639 | Unassigned | Unassigned | Unassigned | 655_7  | Clustered           | 3 VC_655_7   | 3   | 0.0166 | 0.99856978 | 0.0166 | 0 | 0 | 0 | 0 | 1 Ref      |
| MHB20640 | Unassigned | Unassigned | Unassigned | 655_7  | Clustered           | 3 VC_655_7   | 3   | 0.0166 | 0.99856978 | 0.0166 | 0 | 0 | 0 | 0 | 1 Ref      |
| MHB25090 | Unassigned | Unassigned | Unassigned | 882_0  | Clustered           | 20 VC_882_0  | 20  | 0.9917 | 1          | 0.9917 | 0 | 0 | 0 | 0 | 1 Ref      |
| MHB25091 | Unassigned | Unassigned | Unassigned | 904_2  | Clustered           | 7 VC_904_2   | 7   | 0.2857 | 1          | 0.2857 | 0 | 0 | 0 | 0 | 1 Ref      |
| MHB25092 | Unassigned | Unassigned | Unassigned | 1050_1 | Clustered           | 29 VC_1050_1 | 29  | 0.4861 | 1          | 0.4861 | 0 | 0 | 0 | 0 | 0.9581 Ref |
| MHB25094 | Unassigned | Unassigned | Unassigned | 972_0  | Clustered           | 6 VC_972_0   | 6   | 0.2892 | 1          | 0.2892 | 0 | 0 | 0 | 0 | 1 Ref      |
| MHB26055 | Unassigned | Unassigned | Unassigned | 521_0  | Clustered           | 37 VC_521_0  | 37  | 0.912  | 1          | 0.912  | 0 | 0 | 0 | 0 | 1 Ref      |
| MHB26056 | Unassigned | Unassigned | Unassigned | 768_0  | Clustered           | 8 VC_768_0   | 8   | 0.7012 | 1          | 0.7012 | 0 | 0 | 0 | 0 | 1 Ref      |
| MHB26057 | Unassigned | Unassigned | Unassigned | 768_0  | Clustered           | 8 VC_768_0   | 8   | 0.7012 | 1          | 0.7012 | 0 | 0 | 0 | 0 | 1 Ref      |
| MHB26058 | Unassigned | Unassigned | Unassigned | 234_0  | Clustered           | 21 VC_234_0  | 21  | 0.8355 | 1          | 0.8355 | 0 | 0 | 0 | 0 | 1 Ref      |
| MHB26059 | Unassigned | Unassigned | Unassigned | 568_0  | Clustered           | 8 VC_568_0   | 8   | 0.5738 | 1          | 0.5738 | 0 | 0 | 0 | 0 | 1 Ref      |
| MHB26060 | Unassigned | Unassigned | Unassigned | 371_1  | Clustered           | 11 VC_371_1  | 11  | 0.0379 | 1          | 0.0379 | 0 | 0 | 0 | 0 | 0.8545 Ref |
| MHB26061 | Unassigned | Unassigned | Unassigned | 1199_0 | Clustered           | 8 VC_1199_0  | 8   | 0.7928 | 1          | 0.7928 | 0 | 0 | 0 | 0 | 1 Ref      |
| MHB26062 | Unassigned | Unassigned | Unassigned | 556_0  | Clustered           | 21 VC_556_0  | 21  | 0.9912 | 1          | 0.9912 | 0 | 0 | 0 | 0 | 1 Ref      |
| MHB29319 | Unassigned | Unassigned | Unassigned | 132_0  | Clustered           | 4 VC_132_0   | 4   | 0.036  | 0.99998777 | 0.036  | 0 | 0 | 0 | 0 | 1 Ref      |
| MHB31003 | Unassigned | Unassigned | Unassigned | 1054_0 | Clustered           | 12 VC_1054_0 | 12  | 0.2863 | 0.99746644 | 0.2855 | 0 | 0 | 0 | 0 | 1 Ref      |
| MHB31004 | Unassigned | Unassigned | Unassigned | 1077_0 | Clustered           | 48 VC_1077_0 | 48  | 0.8525 | 1          | 0.8525 | 0 | 0 | 0 | 0 | 1 Ref      |
| MHB37457 | Unassigned | Unassigned | Unassigned | 254_0  | Clustered           | 46 VC_254_0  | 46  | 0.5159 | 1          | 0.5159 | 0 | 0 | 0 | 0 | 1 Ref      |
| MHB37458 | Unassigned | Unassigned | Unassigned | 252_0  | Clustered           | 121 VC_252_0 | 121 | 0.7376 | 1          | 0.7376 | 0 | 0 | 0 | 0 | 0.9999 Ref |
| MHB37459 | Unassigned | Unassigned | Unassigned | 252_0  | Clustered           | 121 VC_252_0 | 121 | 0.7376 | 1          | 0.7376 | 0 | 0 | 0 | 0 | 0.9999 Ref |
| MHB37460 | Unassigned | Unassigned | Unassigned | 254_0  | Clustered           | 46 VC_254_0  | 46  | 0.5159 | 1          | 0.5159 | 0 | 0 | 0 | 0 | 1 Ref      |
| MHB37461 | Unassigned | Unassigned | Unassigned | 252_0  | Clustered           | 121 VC_252_0 | 121 | 0.7376 | 1          | 0.7376 | 0 | 0 | 0 | 0 | 0.9999 Ref |
| MHB37462 | Unassigned | Unassigned | Unassigned | 252_0  | Clustered           | 121 VC_252_0 | 121 | 0.7376 | 1          | 0.7376 | 0 | 0 | 0 | 0 | 0.9999 Ref |
| MHB37463 | Unassigned | Unassigned | Unassigned | 254_0  | Clustered           | 46 VC_254_0  | 46  | 0.5159 | 1          | 0.5159 | 0 | 0 | 0 | 0 | 1 Ref      |
| MHB37464 | Unassigned | Unassigned | Unassigned | 254_0  | Clustered           | 46 VC_254_0  | 46  | 0.5159 | 1          | 0.5159 | 0 | 0 | 0 | 0 | 1 Ref      |
| MHB37465 | Unassigned | Unassigned | Unassigned | 252_0  | Clustered           | 121 VC_252_0 | 121 | 0.7376 | 1          | 0.7376 | 0 | 0 | 0 | 0 | 0.9999 Ref |
| MHB37466 | Unassigned | Unassigned | Unassigned | 252_0  | Clustered           | 121 VC_252_0 | 121 | 0.7376 | 1          | 0.7376 | 0 | 0 | 0 | 0 | 0.9999 Ref |
| MHB37467 | Unassigned | Unassigned | Unassigned | 252_0  | Clustered           | 121 VC_252_0 | 121 | 0.7376 | 1          | 0.7376 | 0 | 0 | 0 | 0 | 0.9999 Ref |
| MHB37468 | Unassigned | Unassigned | Unassigned | 252_0  | Clustered           | 121 VC_252_0 | 121 | 0.7376 | 1          | 0.7376 | 0 | 0 | 0 | 0 | 0.9999 Ref |
| MHB37469 | Unassigned | Unassigned | Unassigned | 252_0  | Clustered           | 121 VC_252_0 | 121 | 0.7376 | 1          | 0.7376 | 0 | 0 | 0 | 0 | 0.9999 Ref |
| MHB37470 | Unassigned | Unassigned | Unassigned | 252_0  | Clustered           | 121 VC_252_0 | 121 | 0.7376 | 1          | 0.7376 | 0 | 0 | 0 | 0 | 0.9999 Ref |
| MHB37471 | Unassigned | Unassigned | Unassigned | 252_0  | Clustered           | 121 VC_252_0 | 121 | 0.7376 | 1          | 0.7376 | 0 | 0 | 0 | 0 | 0.9999 Ref |
| MHB37472 | Unassigned | Unassigned | Unassigned | 252_0  | Clustered           | 121 VC_252_0 | 121 | 0.7376 | 1          | 0.7376 | 0 | 0 | 0 | 0 | 0.9999 Ref |
| MHB37473 | Unassigned | Unassigned | Unassigned | 254_0  | Clustered           | 46 VC_254_0  | 46  | 0.5159 | 1          | 0.5159 | 0 | 0 | 0 | 0 | 1 Ref      |
| MHB37474 | Unassigned | Unassigned | Unassigned | 252_0  | Clustered           | 121 VC_252_0 | 121 | 0.7376 | 1          | 0.7376 | 0 | 0 | 0 | 0 | 0.9999 Ref |
| MHB37475 | Unassigned | Unassigned | Unassigned | 254_0  | Clustered           | 46 VC_254_0  | 46  | 0.5159 | 1          | 0.5159 | 0 | 0 | 0 | 0 | 1 Ref      |
| MHB37476 | Unassigned | Unassigned | Unassigned | 254_0  | Clustered           | 46 VC_254_0  | 46  | 0.5159 | 1          | 0.5159 | 0 | 0 | 0 | 0 | 1 Ref      |
| MHB37477 | Unassigned | Unassigned | Unassigned | 252_0  | Clustered           | 121 VC_252_0 | 121 | 0.7376 | 1          | 0.7376 | 0 | 0 | 0 | 0 | 0.9999 Ref |
| MHB37478 | Unassigned | Unassigned | Unassigned | 254_0  | Clustered           | 46 VC_254_0  | 46  | 0.5159 | 1          | 0.5159 | 0 | 0 | 0 | 0 | 1 Ref      |
| MHB37479 | Unassigned | Unassigned | Unassigned | 254_0  | Clustered           | 46 VC_254_0  | 46  | 0.5159 | 1          | 0.5159 | 0 | 0 | 0 | 0 | 1 Ref      |
| MHB37480 | Unassigned | Unassigned | Unassigned | 252_0  | Clustered           | 121 VC_252_0 | 121 | 0.7376 | 1          | 0.7376 | 0 | 0 | 0 | 0 | 0.9999 Ref |
| MHB37481 | Unassigned | Unassigned | Unassigned | 252_0  | Clustered           | 121 VC_252_0 | 121 | 0.7376 | 1          | 0.7376 | 0 | 0 | 0 | 0 | 0.9999 Ref |
| MHB37482 | Unassigned | Unassigned | Unassigned | 252_0  | Clustered           | 121 VC_252_0 | 121 | 0.7376 | 1          | 0.7376 | 0 | 0 | 0 | 0 | 0.9999 Ref |
| MHB37483 | Unassigned | Unassigned | Unassigned | 252_0  | Clustered           | 121 VC_252_0 | 121 | 0.7376 | 1          | 0.7376 | 0 | 0 | 0 | 0 | 0.9999 Ref |
| MHB37484 | Unassigned | Unassigned | Unassigned | 254_0  | Clustered           | 46 VC_254_0  | 46  | 0.5159 | 1          | 0.5159 | 0 | 0 | 0 | 0 | 1 Ref      |
| MHB37485 | Unassigned | Unassigned | Unassigned | 252_0  | Clustered           | 121 VC_252_0 | 121 | 0.7376 | 1          | 0.7376 | 0 | 0 | 0 | 0 | 0.9999 Ref |
| MHB37486 | Unassigned | Unassigned | Unassigned | 252_0  | Clustered           | 121 VC_252_0 | 121 | 0.7376 | 1          | 0.7376 | 0 | 0 | 0 | 0 | 0.9999 Ref |
| MHB37487 | Unassigned | Unassigned | Unassigned | 252_0  | Clustered           | 121 VC_252_0 | 121 | 0.7376 | 1          | 0.7376 | 0 | 0 | 0 | 0 | 0.9999 Ref |
| MHB37488 | Unassigned | Unassigned | Unassigned | 252_0  | Clustered           | 121 VC_252_0 | 121 | 0.7376 | 1          | 0.7376 | 0 | 0 | 0 | 0 | 0.9999 Ref |
| MHB37489 | Unassigned | Unassigned | Unassigned | 252_0  | Clustered           | 121 VC_252_0 | 121 | 0.7376 | 1          | 0.7376 | 0 | 0 | 0 | 0 | 0.9999 Ref |
| MHB37490 | Unassigned | Unassigned | Unassigned | 252_0  | Clustered           | 121 VC_252_0 | 121 | 0.7376 | 1          | 0.7376 | 0 | 0 | 0 | 0 | 0.9999 Ref |
| MHB37491 | Unassigned | Unassigned | Unassigned | 252_0  | Clustered           | 121 VC_252_0 | 121 | 0.7376 | 1          | 0.7376 | 0 | 0 | 0 | 0 | 0.9999 Ref |
| MHB37492 | Unassigned | Unassigned | Unassigned | 252_0  | Clustered           | 121 VC_252_0 | 121 | 0.7376 | 1          | 0.7376 | 0 | 0 | 0 | 0 | 0.9999 Ref |
| MHB37493 | Unassigned | Unassigned | Unassigned | 252_0  | Clustered           | 121 VC_252_0 | 121 | 0.7376 | 1          | 0.7376 | 0 | 0 | 0 | 0 | 0.9999 Ref |
| MHB37494 | Unassigned | Unassigned | Unassigned | 254_0  | Clustered           | 46 VC_254_0  | 46  | 0.5159 | 1          | 0.5159 | 0 | 0 | 0 | 0 | 1 Ref      |
| MHB37495 | Unassigned | Unassigned | Unassigned | 252_0  | Clustered           | 121 VC_252_0 | 121 | 0.7376 | 1          | 0.7376 | 0 | 0 | 0 | 0 | 0.9999 Ref |
| MHB37496 | Unassigned | Unassigned | Unassigned | 252_0  | Clustered           | 121 VC_252_0 | 121 | 0.7376 | 1          | 0.7376 | 0 | 0 | 0 | 0 | 0.9999 Ref |
| MHB37497 | Unassigned | Unassigned | Unassigned | 252_0  | Clustered           | 121 VC_252_0 | 121 | 0.7376 | 1          | 0.7376 | 0 | 0 | 0 | 0 | 0.9999 Ref |
| MHB37498 | Unassigned | Unassigned | Unassigned | 254_0  | Clustered           | 46 VC_254_0  | 46  | 0.5159 | 1          | 0.5159 | 0 | 0 | 0 | 0 | 1 Ref      |
| MHB37499 | Unassigned | Unassigned | Unassigned | 252_0  | Clustered           | 121 VC_252_0 | 121 | 0.7376 | 1          | 0.7376 | 0 | 0 | 0 | 0 | 0.9999 Ref |
| MHB37500 | Unassigned | Unassigned | Unassigned | 252_0  | Clustered           | 121 VC_252_0 | 121 | 0.7376 | 1          | 0.7376 | 0 | 0 | 0 | 0 | 0.9999 Ref |
| MHB37501 | Unassigned | Unassigned | Unassigned | 252_0  | Clustered           | 121 VC_252_0 | 121 | 0.7376 | 1          | 0.7376 | 0 | 0 | 0 | 0 | 0.9999 Ref |
| MHB37502 | Unassigned | Unassigned | Unassigned | 254_0  | Clustered           | 46 VC_254_0  | 46  | 0.5159 | 1          | 0.5159 | 0 | 0 | 0 | 0 | 1 Ref      |
| MHB37503 | Unassigned | Unassigned | Unassigned | 254_0  | Clustered           | 46 VC_254_0  | 46  | 0.5159 | 1          | 0.5159 | 0 | 0 | 0 | 0 | 1 Ref      |
| MHB37504 | Unassigned | Unassigned | Unassigned | 252_0  | Clustered           | 121 VC_252_0 | 121 | 0.7376 | 1          | 0.7376 | 0 | 0 | 0 | 0 | 0.9999 Ref |
| MHB37505 | Unassigned | Unassigned | Unassigned | 254_0  | Clustered           | 46 VC_254_0  | 46  | 0.5159 | 1          | 0.5159 | 0 | 0 | 0 | 0 | 1 Ref      |
| MHB37506 | Unassigned | Unassigned | Unassigned | 252_0  | Clustered           | 121 VC_252_0 | 121 | 0.7376 | 1          | 0.7376 | 0 | 0 | 0 | 0 | 0.9999 Ref |
| MHB37507 | Unassigned | Unassigned | Unassigned | 254_0  | Clustered           | 46 VC_254_0  | 46  | 0.5159 | 1          | 0.5159 | 0 | 0 | 0 | 0 | 1 Ref      |
| MHB37508 | Unassigned | Unassigned | Unassigned | 252_0  | Clustered           | 121 VC_252_0 | 121 | 0.7376 | 1          | 0.7376 | 0 | 0 | 0 | 0 | 0.9999 Ref |
| MHB37509 | Unassigned | Unassigned | Unassigned | 254_0  | Clustered           | 46 VC_254_0  | 46  | 0.5159 | 1          | 0.5159 | 0 | 0 | 0 | 0 | 1 Ref      |
| MHB37510 | Unassigned | Unassigned | Unassigned | 254_0  | Clustered           | 46 VC_254_0  | 46  | 0.5159 | 1          | 0.5159 | 0 | 0 | 0 | 0 | 1 Ref      |
| MHB37511 | Unassigned | Unassigned | Unassigned | 254_0  | Clustered           | 46 VC_254_0  | 46  | 0.5159 | 1          | 0.5159 | 0 | 0 | 0 | 0 | 1 Ref      |
| MHB39157 | Unassigned | Unassigned | Unassigned | 1363_0 | Clustered           | 2 VC_1363_0  | 2   | 0.8326 | 0.72985431 | 0.6077 | 0 | 0 | 0 | 0 | 1 Ref      |
| MHB40212 | Unassigned | Unassigned | Unassigned | 133_22 | Clustered           | 13 VC_133_22 | 13  | 0.0804 | 1          | 0.0804 | 0 | 0 | 0 | 0 | 0.8205 Ref |
| MHB72260 | Unassigned | Unassigned | Unassigned | 96_0   | Clustered           | 30 VC_96_0   | 30  | 0.718  | 1          | 0.718  | 0 | 0 | 0 | 0 | 1 Ref      |



|          |            |            |            |         |                     |              |     |        |            |        |   |   |   |        |     |
|----------|------------|------------|------------|---------|---------------------|--------------|-----|--------|------------|--------|---|---|---|--------|-----|
| MH973661 | Unassigned | Unassigned | Unassigned | 252_0   | Clustered           | 121 VC_252_0 | 121 | 0.7376 | 1          | 0.7376 | 0 | 0 | 0 | 0.9999 | Ref |
| MH973662 | Unassigned | Unassigned | Unassigned | 252_0   | Clustered           | 121 VC_252_0 | 121 | 0.7376 | 1          | 0.7376 | 0 | 0 | 0 | 0.9999 | Ref |
| MH973663 | Unassigned | Unassigned | Unassigned | 255_0   | Clustered           | 13 VC_255_0  | 13  | 0.2048 | 1          | 0.2048 | 0 | 0 | 0 | 1      | Ref |
| MH973725 | Unassigned | Unassigned | Unassigned | 472_0   | Clustered           | 47 VC_472_0  | 47  | 0.9025 | 1          | 0.9025 | 0 | 0 | 0 | 1      | Ref |
| MH976506 | Unassigned | Unassigned | Unassigned | 1093_0  | Clustered           | 40 VC_1093_0 | 40  | 0.8754 | 1          | 0.8754 | 0 | 0 | 0 | 1      | Ref |
| MH976507 | Unassigned | Unassigned | Unassigned | 1093_0  | Clustered           | 40 VC_1093_0 | 40  | 0.8754 | 1          | 0.8754 | 0 | 0 | 0 | 1      | Ref |
| MH976508 | Unassigned | Unassigned | Unassigned | 1093_0  | Clustered           | 40 VC_1093_0 | 40  | 0.8754 | 1          | 0.8754 | 0 | 0 | 0 | 1      | Ref |
| MH976509 | Unassigned | Unassigned | Unassigned | 1093_0  | Clustered           | 40 VC_1093_0 | 40  | 0.8754 | 1          | 0.8754 | 0 | 0 | 0 | 1      | Ref |
| MH976510 | Unassigned | Unassigned | Unassigned | 1093_0  | Clustered           | 40 VC_1093_0 | 40  | 0.8754 | 1          | 0.8754 | 0 | 0 | 0 | 1      | Ref |
| MH976511 | Unassigned | Unassigned | Unassigned | 1093_0  | Clustered           | 40 VC_1093_0 | 40  | 0.8754 | 1          | 0.8754 | 0 | 0 | 0 | 1      | Ref |
| MH976512 | Unassigned | Unassigned | Unassigned | 1093_0  | Clustered           | 40 VC_1093_0 | 40  | 0.8754 | 1          | 0.8754 | 0 | 0 | 0 | 1      | Ref |
| MH976513 | Unassigned | Unassigned | Unassigned | 1093_0  | Clustered           | 40 VC_1093_0 | 40  | 0.8754 | 1          | 0.8754 | 0 | 0 | 0 | 1      | Ref |
| MH976514 | Unassigned | Unassigned | Unassigned | 1093_0  | Clustered           | 40 VC_1093_0 | 40  | 0.8754 | 1          | 0.8754 | 0 | 0 | 0 | 1      | Ref |
| MH976515 | Unassigned | Unassigned | Unassigned | 890_1   | Clustered           | 4 VC_890_1   | 4   | 0.4613 | 0.99998458 | 0.4613 | 0 | 0 | 0 | 1      | Ref |
| MH976516 | Unassigned | Unassigned | Unassigned | 768_0   | Clustered           | 8 VC_768_0   | 8   | 0.7012 | 1          | 0.7012 | 0 | 0 | 0 | 1      | Ref |
| MH976517 | Unassigned | Unassigned | Unassigned | 513_0   | Clustered           | 32 VC_513_0  | 32  | 0.6881 | 1          | 0.6881 | 0 | 0 | 0 | 1      | Ref |
| MH976518 | Unassigned | Unassigned | Unassigned | 1093_0  | Clustered           | 40 VC_1093_0 | 40  | 0.8754 | 1          | 0.8754 | 0 | 0 | 0 | 1      | Ref |
| MH976519 | Unassigned | Unassigned | Unassigned | 1093_0  | Clustered           | 40 VC_1093_0 | 40  | 0.8754 | 1          | 0.8754 | 0 | 0 | 0 | 1      | Ref |
| MH979674 | Unassigned | Unassigned | Unassigned | 423_0   | Clustered           | 45 VC_423_0  | 45  | 0.9484 | 1          | 0.9484 | 0 | 0 | 0 | 1      | Ref |
| MH983004 | Unassigned | Unassigned | Unassigned | 272_0   | Clustered           | 11 VC_272_0  | 11  | 0.4915 | 1          | 0.4915 | 0 | 0 | 0 | 0.8727 | Ref |
| MH992121 | Unassigned | Unassigned | Unassigned | 283_188 | Clustered/Singleton | 1 VC_283_188 | 1   | 0      | 1          | 0      | 0 | 0 | 0 | 1      | Ref |
| MH992122 | Unassigned | Unassigned | Unassigned | 286_10  | Clustered           | 9 VC_286_10  | 9   | 0.0615 | 0.99999878 | 0.0615 | 0 | 0 | 0 | 0.6667 | Ref |
| MH992123 | Unassigned | Unassigned | Unassigned | 779_0   | Clustered           | 37 VC_779_0  | 37  | 0.5682 | 1          | 0.5682 | 0 | 0 | 0 | 1      | Ref |
| MH992131 | Unassigned | Unassigned | Unassigned | 805_0   | Clustered           | 4 VC_805_0   | 4   | 0.9081 | 0.99622688 | 0.9046 | 0 | 0 | 0 | 1      | Ref |
| MH992154 | Unassigned | Unassigned | Unassigned | 1364_0  | Clustered           | 3 VC_1364_0  | 3   | 1      | 1          | 1      | 0 | 0 | 0 | 1      | Ref |
| MH992155 | Unassigned | Unassigned | Unassigned | 1365_0  | Clustered           | 3 VC_1365_0  | 3   | 1      | 1          | 1      | 0 | 0 | 0 | 1      | Ref |
| MH992156 | Unassigned | Unassigned | Unassigned | 995_0   | Clustered           | 69 VC_995_0  | 69  | 0.8547 | 1          | 0.8547 | 0 | 0 | 0 | 1      | Ref |
| MH992157 | Unassigned | Unassigned | Unassigned | 198_0   | Clustered           | 28 VC_198_0  | 28  | 0.2429 | 0.99971175 | 0.2429 | 0 | 0 | 0 | 1      | Ref |
| MH992158 | Unassigned | Unassigned | Unassigned | 327_0   | Clustered           | 12 VC_327_0  | 12  | 0.8925 | 1          | 0.8925 | 0 | 0 | 0 | 1      | Ref |
| MH992159 | Unassigned | Unassigned | Unassigned | 1339_0  | Clustered           | 7 VC_1339_0  | 7   | 0.9177 | 0.99772305 | 0.9156 | 0 | 0 | 0 | 1      | Ref |
| MH992160 | Unassigned | Unassigned | Unassigned | 327_0   | Clustered           | 12 VC_327_0  | 12  | 0.8925 | 1          | 0.8925 | 0 | 0 | 0 | 1      | Ref |
| MH992161 | Unassigned | Unassigned | Unassigned | 995_0   | Clustered           | 69 VC_995_0  | 69  | 0.8547 | 1          | 0.8547 | 0 | 0 | 0 | 1      | Ref |
| MH992163 | Unassigned | Unassigned | Unassigned | 1077_0  | Clustered           | 48 VC_1077_0 | 48  | 0.8525 | 1          | 0.8525 | 0 | 0 | 0 | 1      | Ref |
| MH992164 | Unassigned | Unassigned | Unassigned | 1077_0  | Clustered           | 48 VC_1077_0 | 48  | 0.8525 | 1          | 0.8525 | 0 | 0 | 0 | 1      | Ref |
| MH992165 | Unassigned | Unassigned | Unassigned | 1066_0  | Clustered           | 52 VC_1066_0 | 52  | 0.7682 | 1          | 0.7682 | 0 | 0 | 0 | 1      | Ref |
| MH992167 | Unassigned | Unassigned | Unassigned | 1367_0  | Clustered           | 2 VC_1367_0  | 2   | 1      | 1          | 1      | 0 | 0 | 0 | 1      | Ref |
| MH992169 | Unassigned | Unassigned | Unassigned | 997_0   | Clustered/Singleton | 1 VC_997_0   | 1   | 0      | 1          | 0      | 0 | 0 | 0 | 1      | Ref |
| MH992170 | Unassigned | Unassigned | Unassigned | 1059_0  | Clustered           | 3 VC_1059_0  | 3   | 0.3928 | 0.9839946  | 0.3865 | 0 | 0 | 0 | 1      | Ref |
| MH992171 | Unassigned | Unassigned | Unassigned | 1368_0  | Clustered           | 2 VC_1368_0  | 2   | 1      | 1          | 1      | 0 | 0 | 0 | 1      | Ref |
| MH992173 | Unassigned | Unassigned | Unassigned | 1324_0  | Clustered           | 4 VC_1324_0  | 4   | 0.6008 | 0.54407361 | 0.3269 | 0 | 0 | 0 | 1      | Ref |
| MH992174 | Unassigned | Unassigned | Unassigned | 198_0   | Clustered           | 28 VC_198_0  | 28  | 0.2429 | 0.99971175 | 0.2429 | 0 | 0 | 0 | 1      | Ref |
| MH992175 | Unassigned | Unassigned | Unassigned | 1339_0  | Clustered           | 7 VC_1339_0  | 7   | 0.9177 | 0.99772305 | 0.9156 | 0 | 0 | 0 | 1      | Ref |
| MH992177 | Unassigned | Unassigned | Unassigned | 327_0   | Clustered           | 12 VC_327_0  | 12  | 0.8925 | 1          | 0.8925 | 0 | 0 | 0 | 1      | Ref |
| MH992178 | Unassigned | Unassigned | Unassigned | 327_0   | Clustered           | 12 VC_327_0  | 12  | 0.8925 | 1          | 0.8925 | 0 | 0 | 0 | 1      | Ref |
| MH992180 | Unassigned | Unassigned | Unassigned | 1062_0  | Clustered           | 45 VC_1062_0 | 45  | 0.9734 | 0.50949847 | 0.4959 | 0 | 0 | 0 | 1      | Ref |
| MH992181 | Unassigned | Unassigned | Unassigned | 200_0   | Clustered/Singleton | 1 VC_200_0   | 1   | 0      | 1          | 0      | 0 | 0 | 0 | 1      | Ref |
| MH992182 | Unassigned | Unassigned | Unassigned | 198_0   | Clustered           | 28 VC_198_0  | 28  | 0.2429 | 0.99971175 | 0.2429 | 0 | 0 | 0 | 1      | Ref |
| MH992184 | Unassigned | Unassigned | Unassigned | 995_0   | Clustered           | 69 VC_995_0  | 69  | 0.8547 | 1          | 0.8547 | 0 | 0 | 0 | 1      | Ref |
| MH992185 | Unassigned | Unassigned | Unassigned | 995_0   | Clustered           | 69 VC_995_0  | 69  | 0.8547 | 1          | 0.8547 | 0 | 0 | 0 | 1      | Ref |
| MH992189 | Unassigned | Unassigned | Unassigned | 327_0   | Clustered           | 12 VC_327_0  | 12  | 0.8925 | 1          | 0.8925 | 0 | 0 | 0 | 1      | Ref |
| MH992191 | Unassigned | Unassigned | Unassigned | 327_0   | Clustered           | 12 VC_327_0  | 12  | 0.8925 | 1          | 0.8925 | 0 | 0 | 0 | 1      | Ref |
| MH992192 | Unassigned | Unassigned | Unassigned | 1077_0  | Clustered           | 48 VC_1077_0 | 48  | 0.8525 | 1          | 0.8525 | 0 | 0 | 0 | 1      | Ref |
| MH992193 | Unassigned | Unassigned | Unassigned | 1059_0  | Clustered           | 3 VC_1059_0  | 3   | 0.3928 | 0.9839946  | 0.3865 | 0 | 0 | 0 | 1      | Ref |
| MH992194 | Unassigned | Unassigned | Unassigned | 327_0   | Clustered           | 12 VC_327_0  | 12  | 0.8925 | 1          | 0.8925 | 0 | 0 | 0 | 1      | Ref |
| MH992195 | Unassigned | Unassigned | Unassigned | 398_0   | Clustered           | 48 VC_398_0  | 48  | 0.4813 | 1          | 0.4813 | 0 | 0 | 0 | 1      | Ref |
| MH992196 | Unassigned | Unassigned | Unassigned | 1365_0  | Clustered           | 3 VC_1365_0  | 3   | 1      | 1          | 1      | 0 | 0 | 0 | 1      | Ref |
| MH992197 | Unassigned | Unassigned | Unassigned | 327_0   | Clustered           | 12 VC_327_0  | 12  | 0.8925 | 1          | 0.8925 | 0 | 0 | 0 | 1      | Ref |
| MH992199 | Unassigned | Unassigned | Unassigned | 1077_0  | Clustered           | 48 VC_1077_0 | 48  | 0.8525 | 1          | 0.8525 | 0 | 0 | 0 | 1      | Ref |
| MH992200 | Unassigned | Unassigned | Unassigned | 1339_0  | Clustered           | 7 VC_1339_0  | 7   | 0.9177 | 0.99772305 | 0.9156 | 0 | 0 | 0 | 1      | Ref |
| MH992202 | Unassigned | Unassigned | Unassigned | 1077_0  | Clustered           | 48 VC_1077_0 | 48  | 0.8525 | 1          | 0.8525 | 0 | 0 | 0 | 1      | Ref |
| MH992205 | Unassigned | Unassigned | Unassigned | 1365_0  | Clustered           | 3 VC_1365_0  | 3   | 1      | 1          | 1      | 0 | 0 | 0 | 1      | Ref |
| MH992206 | Unassigned | Unassigned | Unassigned | 1077_0  | Clustered           | 48 VC_1077_0 | 48  | 0.8525 | 1          | 0.8525 | 0 | 0 | 0 | 1      | Ref |
| MH992207 | Unassigned | Unassigned | Unassigned | 327_0   | Clustered           | 12 VC_327_0  | 12  | 0.8925 | 1          | 0.8925 | 0 | 0 | 0 | 1      | Ref |
| MH992208 | Unassigned | Unassigned | Unassigned | 1077_0  | Clustered           | 48 VC_1077_0 | 48  | 0.8525 | 1          | 0.8525 | 0 | 0 | 0 | 1      | Ref |
| MH992210 | Unassigned | Unassigned | Unassigned | 198_0   | Clustered           | 28 VC_198_0  | 28  | 0.2429 | 0.99971175 | 0.2429 | 0 | 0 | 0 | 1      | Ref |
| MH992211 | Unassigned | Unassigned | Unassigned | 398_0   | Clustered           | 48 VC_398_0  | 48  | 0.4813 | 1          | 0.4813 | 0 | 0 | 0 | 1      | Ref |
| MH992213 | Unassigned | Unassigned | Unassigned | 995_0   | Clustered           | 69 VC_995_0  | 69  | 0.8547 | 1          | 0.8547 | 0 | 0 | 0 | 1      | Ref |
| MH992214 | Unassigned | Unassigned | Unassigned | 1077_0  | Clustered           | 48 VC_1077_0 | 48  | 0.8525 | 1          | 0.8525 | 0 | 0 | 0 | 1      | Ref |
| MH992215 | Unassigned | Unassigned | Unassigned | 1077_0  | Clustered           | 48 VC_1077_0 | 48  | 0.8525 | 1          | 0.8525 | 0 | 0 | 0 | 1      | Ref |
| MH992216 | Unassigned | Unassigned | Unassigned | 1077_0  | Clustered           | 48 VC_1077_0 | 48  | 0.8525 | 1          | 0.8525 | 0 | 0 | 0 | 1      | Ref |
| MH992217 | Unassigned | Unassigned | Unassigned | 1077_0  | Clustered           | 48 VC_1077_0 | 48  | 0.8525 | 1          | 0.8525 | 0 | 0 | 0 | 1      | Ref |
| MH992218 | Unassigned | Unassigned | Unassigned | 327_0   | Clustered           | 12 VC_327_0  | 12  | 0.8925 | 1          | 0.8925 | 0 | 0 | 0 | 1      | Ref |
| MH992219 | Unassigned | Unassigned | Unassigned | 1077_0  | Clustered           | 48 VC_1077_0 | 48  | 0.8525 | 1          | 0.8525 | 0 | 0 | 0 | 1      | Ref |
| MH992220 | Unassigned | Unassigned | Unassigned | 1077_0  | Clustered           | 48 VC_1077_0 | 48  | 0.8525 | 1          | 0.8525 | 0 | 0 | 0 | 1      | Ref |
| MH992222 | Unassigned | Unassigned | Unassigned | 1077_0  | Clustered           | 48 VC_1077_0 | 48  | 0.8525 | 1          | 0.8525 | 0 | 0 | 0 | 1      | Ref |
| MH992509 | Unassigned | Unassigned | Unassigned | 637_0   | Clustered           | 115 VC_637_0 | 115 | 0.731  | 1          | 0.731  | 0 | 0 | 0 | 0.8764 | Ref |
| MH992510 | Unassigned | Unassigned | Unassigned | 283_129 | Clustered/Singleton | 1 VC_283_129 | 1   | 0      | 1          | 0      | 0 | 0 | 0 | 1      | Ref |
| MH992513 | Unassigned | Unassigned | Unassigned | 878_0   | Clustered           | 32 VC_878_0  | 32  | 0.9965 | 1          | 0.9965 | 0 | 0 | 0 | 1      | Ref |
| MH999279 | Unassigned | Unassigned | Unassigned | 897_0   | Clustered           | 6 VC_897_0   | 6   | 0.4156 | 1          | 0.4156 | 0 | 0 | 0 | 1      | Ref |
| MH999280 | Unassigned | Unassigned | Unassigned | 815_0   | Clustered           | 8 VC_815_0   | 8   | 0.9801 | 1          | 0.9801 | 0 | 0 | 0 | 1      | Ref |
| MK002701 | Unassigned | Unassigned | Unassigned | 352_0   | Clustered           | 3 VC_352_0   | 3   | 0.7306 | 0.98867275 | 0.7223 | 0 | 0 | 0 | 1      | Ref |



|          |            |            |            |        |                     |              |    |        |            |        |   |   |   |            |
|----------|------------|------------|------------|--------|---------------------|--------------|----|--------|------------|--------|---|---|---|------------|
| MK005300 | Unassigned | Unassigned | Unassigned | 191_20 | Clustered/Singleton | 1 VC_191_20  | 1  | 0      | 1          | 0      | 0 | 0 | 0 | 1 Ref      |
| MK016490 | Unassigned | Unassigned | Unassigned | 744_0  | Clustered           | 10 VC_744_0  | 10 | 0.7049 | 1          | 0.7049 | 0 | 0 | 0 | 1 Ref      |
| MK016491 | Unassigned | Unassigned | Unassigned | 551_5  | Clustered           | 2 VC_551_5   | 2  | 0.0054 | 0.95548062 | 0.0052 | 0 | 0 | 0 | 1 Ref      |
| MK016492 | Unassigned | Unassigned | Unassigned | 525_0  | Clustered           | 25 VC_525_0  | 25 | 0.4597 | 1          | 0.4597 | 0 | 0 | 0 | 1 Ref      |
| MK016494 | Unassigned | Unassigned | Unassigned | 520_31 | Clustered           | 11 VC_520_31 | 11 | 0.0897 | 1          | 0.0897 | 0 | 0 | 0 | 0.6 Ref    |
| MK016495 | Unassigned | Unassigned | Unassigned | 1162_0 | Clustered           | 10 VC_1162_0 | 10 | 0.5715 | 1          | 0.5715 | 0 | 0 | 0 | 1 Ref      |
| MK016496 | Unassigned | Unassigned | Unassigned | 520_77 | Clustered           | 3 VC_520_77  | 3  | 0.0218 | 0.99859911 | 0.0218 | 0 | 0 | 0 | 1 Ref      |
| MK016497 | Unassigned | Unassigned | Unassigned | 1162_0 | Clustered           | 10 VC_1162_0 | 10 | 0.5715 | 1          | 0.5715 | 0 | 0 | 0 | 1 Ref      |
| MK016498 | Unassigned | Unassigned | Unassigned | 551_5  | Clustered           | 2 VC_551_5   | 2  | 0.0054 | 0.95548062 | 0.0052 | 0 | 0 | 0 | 1 Ref      |
| MK016499 | Unassigned | Unassigned | Unassigned | 519_0  | Clustered           | 39 VC_519_0  | 39 | 0.8156 | 1          | 0.8156 | 0 | 0 | 0 | 1 Ref      |
| MK016500 | Unassigned | Unassigned | Unassigned | 744_0  | Clustered           | 10 VC_744_0  | 10 | 0.7049 | 1          | 0.7049 | 0 | 0 | 0 | 1 Ref      |
| MK016501 | Unassigned | Unassigned | Unassigned | 563_0  | Clustered           | 2 VC_563_0   | 2  | 0.0727 | 0.956426   | 0.0695 | 0 | 0 | 0 | 1 Ref      |
| MK016502 | Unassigned | Unassigned | Unassigned | 551_0  | Clustered           | 16 VC_551_0  | 16 | 0.0915 | 1          | 0.0915 | 0 | 0 | 0 | 0.6667 Ref |
| MK016503 | Unassigned | Unassigned | Unassigned | 236_0  | Clustered           | 72 VC_236_0  | 72 | 0.8104 | 1          | 0.8104 | 0 | 0 | 0 | 1 Ref      |
| MK016504 | Unassigned | Unassigned | Unassigned | 520_90 | Clustered/Singleton | 1 VC_520_90  | 1  | 0      | 1          | 0      | 0 | 0 | 0 | 1 Ref      |
| MK016662 | Unassigned | Unassigned | Unassigned | 340_0  | Clustered           | 31 VC_340_0  | 31 | 0.9549 | 1          | 0.9549 | 0 | 0 | 0 | 1 Ref      |
| MK016664 | Unassigned | Unassigned | Unassigned | 435_1  | Clustered/Singleton | 1 VC_435_1   | 1  | 0      | 1          | 0      | 0 | 0 | 0 | 1 Ref      |
| MK017819 | Unassigned | Unassigned | Unassigned | 1022_0 | Clustered           | 4 VC_1022_0  | 4  | 0.8047 | 0.99996089 | 0.8046 | 0 | 0 | 0 | 1 Ref      |
| MK017820 | Unassigned | Unassigned | Unassigned | 899_0  | Clustered           | 4 VC_899_0   | 4  | 0.2655 | 0.99997104 | 0.2655 | 0 | 0 | 0 | 1 Ref      |
| MK024806 | Unassigned | Unassigned | Unassigned | 582_3  | Clustered           | 12 VC_582_3  | 12 | 0.2357 | 1          | 0.2357 | 0 | 0 | 0 | 0.8636 Ref |
| MK033136 | Unassigned | Unassigned | Unassigned | 451_0  | Clustered           | 80 VC_451_0  | 80 | 0.9991 | 1          | 0.9991 | 0 | 0 | 0 | 1 Ref      |
| MK033137 | Unassigned | Unassigned | Unassigned | 130_0  | Clustered           | 19 VC_130_0  | 19 | 0.6068 | 1          | 0.6068 | 0 | 0 | 0 | 1 Ref      |
| MK034952 | Unassigned | Unassigned | Unassigned | 2_0    | Clustered           | 4 VC_2_0     | 4  | 0.1311 | 0.99998692 | 0.1311 | 0 | 0 | 0 | 1 Ref      |
| MK047717 | Unassigned | Unassigned | Unassigned | 286_15 | Clustered           | 2 VC_286_15  | 2  | 0.0073 | 0.75626308 | 0.0055 | 0 | 0 | 0 | 1 Ref      |
| MK047718 | Unassigned | Unassigned | Unassigned | 286_17 | Clustered           | 8 VC_286_17  | 8  | 0.0535 | 0.99997829 | 0.0535 | 0 | 0 | 0 | 0.6071 Ref |
| MK050846 | Unassigned | Unassigned | Unassigned | 191_32 | Clustered           | 12 VC_191_32 | 12 | 0.0683 | 1          | 0.0683 | 0 | 0 | 0 | 0.7576 Ref |
| MK053931 | Unassigned | Unassigned | Unassigned | 878_0  | Clustered           | 32 VC_878_0  | 32 | 0.9965 | 1          | 0.9965 | 0 | 0 | 0 | 1 Ref      |
| MK054204 | Unassigned | Unassigned | Unassigned | 599_0  | Clustered           | 50 VC_599_0  | 50 | 0.9989 | 1          | 0.9989 | 0 | 0 | 0 | 1 Ref      |
| MK054205 | Unassigned | Unassigned | Unassigned | 599_0  | Clustered           | 50 VC_599_0  | 50 | 0.9989 | 1          | 0.9989 | 0 | 0 | 0 | 1 Ref      |
| MK054206 | Unassigned | Unassigned | Unassigned | 599_0  | Clustered           | 50 VC_599_0  | 50 | 0.9989 | 1          | 0.9989 | 0 | 0 | 0 | 1 Ref      |
| MK054207 | Unassigned | Unassigned | Unassigned | 599_0  | Clustered           | 50 VC_599_0  | 50 | 0.9989 | 1          | 0.9989 | 0 | 0 | 0 | 1 Ref      |
| MK054208 | Unassigned | Unassigned | Unassigned | 599_0  | Clustered           | 50 VC_599_0  | 50 | 0.9989 | 1          | 0.9989 | 0 | 0 | 0 | 1 Ref      |
| MK054209 | Unassigned | Unassigned | Unassigned | 599_0  | Clustered           | 50 VC_599_0  | 50 | 0.9989 | 1          | 0.9989 | 0 | 0 | 0 | 1 Ref      |
| MK054210 | Unassigned | Unassigned | Unassigned | 599_0  | Clustered           | 50 VC_599_0  | 50 | 0.9989 | 1          | 0.9989 | 0 | 0 | 0 | 1 Ref      |
| MK054211 | Unassigned | Unassigned | Unassigned | 599_0  | Clustered           | 50 VC_599_0  | 50 | 0.9989 | 1          | 0.9989 | 0 | 0 | 0 | 1 Ref      |
| MK054212 | Unassigned | Unassigned | Unassigned | 599_0  | Clustered           | 50 VC_599_0  | 50 | 0.9989 | 1          | 0.9989 | 0 | 0 | 0 | 1 Ref      |
| MK054213 | Unassigned | Unassigned | Unassigned | 599_0  | Clustered           | 50 VC_599_0  | 50 | 0.9989 | 1          | 0.9989 | 0 | 0 | 0 | 1 Ref      |
| MK054214 | Unassigned | Unassigned | Unassigned | 599_0  | Clustered           | 50 VC_599_0  | 50 | 0.9989 | 1          | 0.9989 | 0 | 0 | 0 | 1 Ref      |
| MK054215 | Unassigned | Unassigned | Unassigned | 599_0  | Clustered           | 50 VC_599_0  | 50 | 0.9989 | 1          | 0.9989 | 0 | 0 | 0 | 1 Ref      |
| MK054216 | Unassigned | Unassigned | Unassigned | 599_0  | Clustered           | 50 VC_599_0  | 50 | 0.9989 | 1          | 0.9989 | 0 | 0 | 0 | 1 Ref      |
| MK054217 | Unassigned | Unassigned | Unassigned | 599_0  | Clustered           | 50 VC_599_0  | 50 | 0.9989 | 1          | 0.9989 | 0 | 0 | 0 | 1 Ref      |
| MK054218 | Unassigned | Unassigned | Unassigned | 599_0  | Clustered           | 50 VC_599_0  | 50 | 0.9989 | 1          | 0.9989 | 0 | 0 | 0 | 1 Ref      |
| MK054219 | Unassigned | Unassigned | Unassigned | 599_0  | Clustered           | 50 VC_599_0  | 50 | 0.9989 | 1          | 0.9989 | 0 | 0 | 0 | 1 Ref      |
| MK054220 | Unassigned | Unassigned | Unassigned | 599_0  | Clustered           | 50 VC_599_0  | 50 | 0.9989 | 1          | 0.9989 | 0 | 0 | 0 | 1 Ref      |
| MK054221 | Unassigned | Unassigned | Unassigned | 599_0  | Clustered           | 50 VC_599_0  | 50 | 0.9989 | 1          | 0.9989 | 0 | 0 | 0 | 1 Ref      |
| MK054222 | Unassigned | Unassigned | Unassigned | 599_0  | Clustered           | 50 VC_599_0  | 50 | 0.9989 | 1          | 0.9989 | 0 | 0 | 0 | 1 Ref      |
| MK054223 | Unassigned | Unassigned | Unassigned | 599_0  | Clustered           | 50 VC_599_0  | 50 | 0.9989 | 1          | 0.9989 | 0 | 0 | 0 | 1 Ref      |
| MK054224 | Unassigned | Unassigned | Unassigned | 599_0  | Clustered           | 50 VC_599_0  | 50 | 0.9989 | 1          | 0.9989 | 0 | 0 | 0 | 1 Ref      |
| MK054225 | Unassigned | Unassigned | Unassigned | 599_0  | Clustered           | 50 VC_599_0  | 50 | 0.9989 | 1          | 0.9989 | 0 | 0 | 0 | 1 Ref      |
| MK054226 | Unassigned | Unassigned | Unassigned | 599_0  | Clustered           | 50 VC_599_0  | 50 | 0.9989 | 1          | 0.9989 | 0 | 0 | 0 | 1 Ref      |
| MK054227 | Unassigned | Unassigned | Unassigned | 599_0  | Clustered           | 50 VC_599_0  | 50 | 0.9989 | 1          | 0.9989 | 0 | 0 | 0 | 1 Ref      |
| MK054228 | Unassigned | Unassigned | Unassigned | 599_0  | Clustered           | 50 VC_599_0  | 50 | 0.9989 | 1          | 0.9989 | 0 | 0 | 0 | 1 Ref      |
| MK054229 | Unassigned | Unassigned | Unassigned | 599_0  | Clustered           | 50 VC_599_0  | 50 | 0.9989 | 1          | 0.9989 | 0 | 0 | 0 | 1 Ref      |
| MK054230 | Unassigned | Unassigned | Unassigned | 599_0  | Clustered           | 50 VC_599_0  | 50 | 0.9989 | 1          | 0.9989 | 0 | 0 | 0 | 1 Ref      |
| MK054231 | Unassigned | Unassigned | Unassigned | 599_0  | Clustered           | 50 VC_599_0  | 50 | 0.9989 | 1          | 0.9989 | 0 | 0 | 0 | 1 Ref      |
| MK054232 | Unassigned | Unassigned | Unassigned | 599_0  | Clustered           | 50 VC_599_0  | 50 | 0.9989 | 1          | 0.9989 | 0 | 0 | 0 | 1 Ref      |
| MK054233 | Unassigned | Unassigned | Unassigned | 599_0  | Clustered           | 50 VC_599_0  | 50 | 0.9989 | 1          | 0.9989 | 0 | 0 | 0 | 1 Ref      |
| MK054234 | Unassigned | Unassigned | Unassigned | 599_0  | Clustered           | 50 VC_599_0  | 50 | 0.9989 | 1          | 0.9989 | 0 | 0 | 0 | 1 Ref      |
| MK054235 | Unassigned | Unassigned | Unassigned | 599_0  | Clustered           | 50 VC_599_0  | 50 | 0.9989 | 1          | 0.9989 | 0 | 0 | 0 | 1 Ref      |
| MK054236 | Unassigned | Unassigned | Unassigned | 599_0  | Clustered           | 50 VC_599_0  | 50 | 0.9989 | 1          | 0.9989 | 0 | 0 | 0 | 1 Ref      |
| MK054237 | Unassigned | Unassigned | Unassigned | 599_0  | Clustered           | 50 VC_599_0  | 50 | 0.9989 | 1          | 0.9989 | 0 | 0 | 0 | 1 Ref      |
| MK059749 | Unassigned | Unassigned | Unassigned | 372_2  | Clustered           | 5 VC_372_2   | 5  | 0.072  | 0.99999997 | 0.072  | 0 | 0 | 0 | 0.9 Ref    |
| MK061407 | Unassigned | Unassigned | Unassigned | 939_0  | Clustered           | 15 VC_939_0  | 15 | 1      | 0          | 0      | 0 | 0 | 0 | 1 Ref      |
| MK061408 | Unassigned | Unassigned | Unassigned | 216_4  | Clustered           | 13 VC_216_4  | 13 | 0.1657 | 1          | 0.1657 | 0 | 0 | 0 | 1 Ref      |
| MK061409 | Unassigned | Unassigned | Unassigned | 225_0  | Clustered           | 32 VC_225_0  | 32 | 0.848  | 1          | 0.848  | 0 | 0 | 0 | 0.996 Ref  |
| MK061410 | Unassigned | Unassigned | Unassigned | 1177_0 | Clustered           | 14 VC_1177_0 | 14 | 0.7847 | 1          | 0.7847 | 0 | 0 | 0 | 0.989 Ref  |
| MK061411 | Unassigned | Unassigned | Unassigned | 508_0  | Clustered           | 32 VC_508_0  | 32 | 0.906  | 1          | 0.906  | 0 | 0 | 0 | 1 Ref      |
| MK061412 | Unassigned | Unassigned | Unassigned | 1072_3 | Clustered           | 6 VC_1072_3  | 6  | 0.1304 | 0.99999994 | 0.1304 | 0 | 0 | 0 | 0.8667 Ref |
| MK061413 | Unassigned | Unassigned | Unassigned | 1207_0 | Clustered           | 29 VC_1207_0 | 29 | 0.8225 | 1          | 0.8225 | 0 | 0 | 0 | 1 Ref      |
| MK061414 | Unassigned | Unassigned | Unassigned | 509_0  | Clustered           | 37 VC_509_0  | 37 | 0.9689 | 1          | 0.9689 | 0 | 0 | 0 | 1 Ref      |
| MK061415 | Unassigned | Unassigned | Unassigned | 325_37 | Clustered           | 3 VC_325_37  | 3  | 0.008  | 0.99634936 | 0.008  | 0 | 0 | 0 | 0.6667 Ref |
| MK064562 | Unassigned | Unassigned | Unassigned | 1354_0 | Clustered           | 3 VC_1354_0  | 3  | 0.983  | 0.9595722  | 0.9432 | 0 | 0 | 0 | 1 Ref      |
| MK064563 | Unassigned | Unassigned | Unassigned | 1354_0 | Clustered           | 3 VC_1354_0  | 3  | 0.983  | 0.9595722  | 0.9432 | 0 | 0 | 0 | 1 Ref      |
| MK064564 | Unassigned | Unassigned | Unassigned | 350_0  | Clustered           | 2 VC_350_0   | 2  | 0.324  | 0.93865445 | 0.3041 | 0 | 0 | 0 | 1 Ref      |
| MK064565 | Unassigned | Unassigned | Unassigned | 348_0  | Clustered           | 22 VC_348_0  | 22 | 0.9602 | 1          | 0.9602 | 0 | 0 | 0 | 1 Ref      |
| MK069403 | Unassigned | Unassigned | Unassigned | 673_0  | Clustered           | 15 VC_673_0  | 15 | 0.8234 | 1          | 0.8234 | 0 | 0 | 0 | 0.7619 Ref |
| MK071653 | Unassigned | Unassigned | Unassigned | 1363_0 | Clustered           | 2 VC_1363_0  | 2  | 0.8326 | 0.72985431 | 0.6077 | 0 | 0 | 0 | 1 Ref      |
| MK075001 | Unassigned | Unassigned | Unassigned | 15_1   | Clustered           | 9 VC_15_1    | 9  | 0.182  | 1          | 0.182  | 0 | 0 | 0 | 0.8889 Ref |
| MK075002 | Unassigned | Unassigned | Unassigned | 15_0   | Clustered           | 3 VC_15_0    | 3  | 0.0481 | 0.9985346  | 0.048  | 0 | 0 | 0 | 1 Ref      |
| MK075003 | Unassigned | Unassigned | Unassigned | 11_0   | Clustered           | 19 VC_11_0   | 19 | 0.7562 | 1          | 0.7562 | 0 | 0 | 0 | 1 Ref      |
| MK075004 | Unassigned | Unassigned | Unassigned | 15_1   | Clustered           | 9 VC_15_1    | 9  | 0.182  | 1          | 0.182  | 0 | 0 | 0 | 0.8889 Ref |



|           |            |            |            |        |                     |              |     |        |            |        |   |   |   |            |
|-----------|------------|------------|------------|--------|---------------------|--------------|-----|--------|------------|--------|---|---|---|------------|
| MK075006  | Unassigned | Unassigned | Unassigned | 11_0   | Clustered           | 19 VC_11_0   | 19  | 0.7562 | 1          | 0.7562 | 0 | 0 | 0 | 1 Ref      |
| MK080312  | Unassigned | Unassigned | Unassigned | 1218_0 | Clustered           | 4 VC_1218_0  | 4   | 0.8905 | 0.99530591 | 0.8863 | 0 | 0 | 0 | 1 Ref      |
| MK084630  | Unassigned | Unassigned | Unassigned | 818_0  | Clustered           | 20 VC_818_0  | 20  | 0.9601 | 1          | 0.9601 | 0 | 0 | 0 | 1 Ref      |
| MK085976  | Unassigned | Unassigned | Unassigned | 704_0  | Clustered           | 16 VC_704_0  | 16  | 0.7274 | 1          | 0.7274 | 0 | 0 | 0 | 1 Ref      |
| MK088078  | Unassigned | Unassigned | Unassigned | 185_0  | Clustered           | 3 VC_185_0   | 3   | 0.4487 | 0.97148006 | 0.4359 | 0 | 0 | 0 | 1 Ref      |
| MK089780  | Unassigned | Unassigned | Unassigned | 699_0  | Clustered           | 71 VC_699_0  | 71  | 0.9352 | 1          | 0.9352 | 0 | 0 | 0 | 1 Ref      |
| MK095192  | Unassigned | Unassigned | Unassigned | 984_0  | Clustered           | 38 VC_984_0  | 38  | 0.9758 | 1          | 0.9758 | 0 | 0 | 0 | 1 Ref      |
| MK095193  | Unassigned | Unassigned | Unassigned | 984_0  | Clustered           | 38 VC_984_0  | 38  | 0.9758 | 1          | 0.9758 | 0 | 0 | 0 | 1 Ref      |
| MK095194  | Unassigned | Unassigned | Unassigned | 984_0  | Clustered           | 38 VC_984_0  | 38  | 0.9758 | 1          | 0.9758 | 0 | 0 | 0 | 1 Ref      |
| MK095195  | Unassigned | Unassigned | Unassigned | 984_0  | Clustered           | 38 VC_984_0  | 38  | 0.9758 | 1          | 0.9758 | 0 | 0 | 0 | 1 Ref      |
| MK095196  | Unassigned | Unassigned | Unassigned | 984_0  | Clustered           | 38 VC_984_0  | 38  | 0.9758 | 1          | 0.9758 | 0 | 0 | 0 | 1 Ref      |
| MK095197  | Unassigned | Unassigned | Unassigned | 984_0  | Clustered           | 38 VC_984_0  | 38  | 0.9758 | 1          | 0.9758 | 0 | 0 | 0 | 1 Ref      |
| MK095198  | Unassigned | Unassigned | Unassigned | 984_0  | Clustered           | 38 VC_984_0  | 38  | 0.9758 | 1          | 0.9758 | 0 | 0 | 0 | 1 Ref      |
| MK095199  | Unassigned | Unassigned | Unassigned | 984_0  | Clustered           | 38 VC_984_0  | 38  | 0.9758 | 1          | 0.9758 | 0 | 0 | 0 | 1 Ref      |
| MK095200  | Unassigned | Unassigned | Unassigned | 984_0  | Clustered           | 38 VC_984_0  | 38  | 0.9758 | 1          | 0.9758 | 0 | 0 | 0 | 1 Ref      |
| MK095201  | Unassigned | Unassigned | Unassigned | 984_0  | Clustered           | 38 VC_984_0  | 38  | 0.9758 | 1          | 0.9758 | 0 | 0 | 0 | 1 Ref      |
| MK095202  | Unassigned | Unassigned | Unassigned | 984_0  | Clustered           | 38 VC_984_0  | 38  | 0.9758 | 1          | 0.9758 | 0 | 0 | 0 | 1 Ref      |
| MK095203  | Unassigned | Unassigned | Unassigned | 984_0  | Clustered           | 38 VC_984_0  | 38  | 0.9758 | 1          | 0.9758 | 0 | 0 | 0 | 1 Ref      |
| MK095204  | Unassigned | Unassigned | Unassigned | 984_0  | Clustered           | 38 VC_984_0  | 38  | 0.9758 | 1          | 0.9758 | 0 | 0 | 0 | 1 Ref      |
| MK095205  | Unassigned | Unassigned | Unassigned | 984_0  | Clustered           | 38 VC_984_0  | 38  | 0.9758 | 1          | 0.9758 | 0 | 0 | 0 | 1 Ref      |
| MK095206  | Unassigned | Unassigned | Unassigned | 984_0  | Clustered           | 38 VC_984_0  | 38  | 0.9758 | 1          | 0.9758 | 0 | 0 | 0 | 1 Ref      |
| MK095207  | Unassigned | Unassigned | Unassigned | 984_0  | Clustered           | 38 VC_984_0  | 38  | 0.9758 | 1          | 0.9758 | 0 | 0 | 0 | 1 Ref      |
| MK095208  | Unassigned | Unassigned | Unassigned | 984_0  | Clustered           | 38 VC_984_0  | 38  | 0.9758 | 1          | 0.9758 | 0 | 0 | 0 | 1 Ref      |
| MK095209  | Unassigned | Unassigned | Unassigned | 984_0  | Clustered           | 38 VC_984_0  | 38  | 0.9758 | 1          | 0.9758 | 0 | 0 | 0 | 1 Ref      |
| MK095210  | Unassigned | Unassigned | Unassigned | 984_0  | Clustered           | 38 VC_984_0  | 38  | 0.9758 | 1          | 0.9758 | 0 | 0 | 0 | 1 Ref      |
| MK095211  | Unassigned | Unassigned | Unassigned | 984_0  | Clustered           | 38 VC_984_0  | 38  | 0.9758 | 1          | 0.9758 | 0 | 0 | 0 | 1 Ref      |
| MK097141  | Unassigned | Unassigned | Unassigned | 642_2  | Clustered           | 6 VC_642_2   | 6   | 0.1679 | 1          | 0.1679 | 0 | 0 | 0 | 1 Ref      |
| MK105819  | Unassigned | Unassigned | Unassigned | 356_0  | Clustered           | 2 VC_356_0   | 2   | 0.1992 | 0.93211095 | 0.1857 | 0 | 0 | 0 | 1 Ref      |
| MK105855  | Unassigned | Unassigned | Unassigned | 705_0  | Clustered           | 11 VC_705_0  | 11  | 0.8861 | 1          | 0.8861 | 0 | 0 | 0 | 1 Ref      |
| MK112526  | Unassigned | Unassigned | Unassigned | 1160_0 | Clustered           | 73 VC_1160_0 | 73  | 0.9835 | 1          | 0.9835 | 0 | 0 | 0 | 1 Ref      |
| MK112527  | Unassigned | Unassigned | Unassigned | 371_15 | Clustered           | 44 VC_371_15 | 44  | 0.1391 | 1          | 0.1391 | 0 | 0 | 0 | 0.7474 Ref |
| MK112528  | Unassigned | Unassigned | Unassigned | 1160_0 | Clustered           | 73 VC_1160_0 | 73  | 0.9835 | 1          | 0.9835 | 0 | 0 | 0 | 1 Ref      |
| MK112529  | Unassigned | Unassigned | Unassigned | 1160_0 | Clustered           | 73 VC_1160_0 | 73  | 0.9835 | 1          | 0.9835 | 0 | 0 | 0 | 1 Ref      |
| MK112530  | Unassigned | Unassigned | Unassigned | 325_41 | Clustered           | 2 VC_325_41  | 2   | 0.0036 | 0.94071129 | 0.0034 | 0 | 0 | 0 | 1 Ref      |
| MK112531  | Unassigned | Unassigned | Unassigned | 1160_0 | Clustered           | 73 VC_1160_0 | 73  | 0.9835 | 1          | 0.9835 | 0 | 0 | 0 | 1 Ref      |
| MK112532  | Unassigned | Unassigned | Unassigned | 325_33 | Clustered           | 4 VC_325_33  | 4   | 0.0149 | 0.99998565 | 0.0149 | 0 | 0 | 0 | 1 Ref      |
| MK112533  | Unassigned | Unassigned | Unassigned | 558_51 | Clustered/Singleton | 1 VC_558_51  | 1   | 0      | 1          | 0      | 0 | 0 | 0 | 1 Ref      |
| MK112534  | Unassigned | Unassigned | Unassigned | 558_10 | Clustered/Singleton | 1 VC_558_10  | 1   | 0      | 1          | 0      | 0 | 0 | 0 | 1 Ref      |
| MK112535  | Unassigned | Unassigned | Unassigned | 1160_0 | Clustered           | 73 VC_1160_0 | 73  | 0.9835 | 1          | 0.9835 | 0 | 0 | 0 | 1 Ref      |
| MK112536  | Unassigned | Unassigned | Unassigned | 371_15 | Clustered           | 44 VC_371_15 | 44  | 0.1391 | 1          | 0.1391 | 0 | 0 | 0 | 0.7474 Ref |
| MK112537  | Unassigned | Unassigned | Unassigned | 236_0  | Clustered           | 72 VC_236_0  | 72  | 0.8104 | 1          | 0.8104 | 0 | 0 | 0 | 1 Ref      |
| MK112538  | Unassigned | Unassigned | Unassigned | 1160_0 | Clustered           | 73 VC_1160_0 | 73  | 0.9835 | 1          | 0.9835 | 0 | 0 | 0 | 1 Ref      |
| MK112539  | Unassigned | Unassigned | Unassigned | 371_11 | Clustered           | 31 VC_371_11 | 31  | 0.0927 | 1          | 0.0927 | 0 | 0 | 0 | 0.7011 Ref |
| MK112540  | Unassigned | Unassigned | Unassigned | 325_48 | Clustered           | 2 VC_325_48  | 2   | 0.0039 | 0.95008941 | 0.0037 | 0 | 0 | 0 | 1 Ref      |
| MK112541  | Unassigned | Unassigned | Unassigned | 558_47 | Clustered           | 3 VC_558_47  | 3   | 0.0064 | 0.80043943 | 0.0051 | 0 | 0 | 0 | 1 Ref      |
| MK112542  | Unassigned | Unassigned | Unassigned | 371_16 | Clustered           | 42 VC_371_16 | 42  | 0.1341 | 1          | 0.1341 | 0 | 0 | 0 | 0.7282 Ref |
| MK112543  | Unassigned | Unassigned | Unassigned | 514_0  | Clustered           | 75 VC_514_0  | 75  | 0.9402 | 1          | 0.9402 | 0 | 0 | 0 | 1 Ref      |
| MK112544  | Unassigned | Unassigned | Unassigned | 371_12 | Clustered           | 4 VC_371_12  | 4   | 0.0126 | 0.99998489 | 0.0126 | 0 | 0 | 0 | 0.8333 Ref |
| MK112545  | Unassigned | Unassigned | Unassigned | 558_47 | Clustered           | 3 VC_558_47  | 3   | 0.0064 | 0.80043943 | 0.0051 | 0 | 0 | 0 | 1 Ref      |
| MK112546  | Unassigned | Unassigned | Unassigned | 371_11 | Clustered           | 31 VC_371_11 | 31  | 0.0927 | 1          | 0.0927 | 0 | 0 | 0 | 0.7011 Ref |
| MK112547  | Unassigned | Unassigned | Unassigned | 525_0  | Clustered           | 25 VC_525_0  | 25  | 0.4597 | 1          | 0.4597 | 0 | 0 | 0 | 1 Ref      |
| MK112548  | Unassigned | Unassigned | Unassigned | 558_47 | Clustered           | 3 VC_558_47  | 3   | 0.0064 | 0.80043943 | 0.0051 | 0 | 0 | 0 | 1 Ref      |
| MK112549  | Unassigned | Unassigned | Unassigned | 558_34 | Clustered/Singleton | 1 VC_558_34  | 1   | 0      | 1          | 0      | 0 | 0 | 0 | 1 Ref      |
| MK112550  | Unassigned | Unassigned | Unassigned | 1224_0 | Clustered           | 19 VC_1224_0 | 19  | 1      | 1          | 1      | 0 | 0 | 0 | 1 Ref      |
| MK112551  | Unassigned | Unassigned | Unassigned | 371_11 | Clustered           | 31 VC_371_11 | 31  | 0.0927 | 1          | 0.0927 | 0 | 0 | 0 | 0.7011 Ref |
| MK112552  | Unassigned | Unassigned | Unassigned | 371_2  | Clustered           | 8 VC_371_2   | 8   | 0.0232 | 1          | 0.0232 | 0 | 0 | 0 | 0.8571 Ref |
| MK112553  | Unassigned | Unassigned | Unassigned | 371_16 | Clustered           | 42 VC_371_16 | 42  | 0.1341 | 1          | 0.1341 | 0 | 0 | 0 | 0.7282 Ref |
| MK112554  | Unassigned | Unassigned | Unassigned | 558_49 | Clustered           | 7 VC_558_49  | 7   | 0.0194 | 0.99510369 | 0.0193 | 0 | 0 | 0 | 0.8571 Ref |
| MK112555  | Unassigned | Unassigned | Unassigned | 371_15 | Clustered           | 44 VC_371_15 | 44  | 0.1391 | 1          | 0.1391 | 0 | 0 | 0 | 0.7474 Ref |
| MK112556  | Unassigned | Unassigned | Unassigned | 520_74 | Clustered           | 2 VC_520_74  | 2   | 0.0075 | 0.95760586 | 0.0072 | 0 | 0 | 0 | 1 Ref      |
| MK112901  | Unassigned | Unassigned | Unassigned | 461_0  | Clustered           | 96 VC_461_0  | 96  | 0.9307 | 1          | 0.9307 | 0 | 0 | 0 | 0.9575 Ref |
| MK1125140 | Unassigned | Unassigned | Unassigned | 695_0  | Clustered           | 48 VC_695_0  | 48  | 0.8162 | 1          | 0.8162 | 0 | 0 | 0 | 1 Ref      |
| MK1125141 | Unassigned | Unassigned | Unassigned | 705_0  | Clustered           | 11 VC_705_0  | 11  | 0.8861 | 1          | 0.8861 | 0 | 0 | 0 | 1 Ref      |
| MK1134560 | Unassigned | Unassigned | Unassigned | 823_0  | Clustered           | 124 VC_823_0 | 124 | 0.9492 | 1          | 0.9492 | 0 | 0 | 0 | 1 Ref      |
| MK134568  | Unassigned | Unassigned | Unassigned | 111_0  | Clustered           | 91 VC_111_0  | 91  | 0.9587 | 1          | 0.9587 | 0 | 0 | 0 | 1 Ref      |
| MK138526  | Unassigned | Unassigned | Unassigned | 76_0   | Clustered           | 37 VC_76_0   | 37  | 0.9403 | 1          | 0.9403 | 0 | 0 | 0 | 1 Ref      |
| MK138527  | Unassigned | Unassigned | Unassigned | 835_0  | Clustered           | 67 VC_835_0  | 67  | 0.9624 | 1          | 0.9624 | 0 | 0 | 0 | 1 Ref      |
| MK144667  | Unassigned | Unassigned | Unassigned | 179_0  | Clustered           | 53 VC_179_0  | 53  | 0.9137 | 1          | 0.9137 | 0 | 0 | 0 | 1 Ref      |
| MK165087  | Unassigned | Unassigned | Unassigned | 722_0  | Clustered           | 13 VC_722_0  | 13  | 0.5104 | 1          | 0.5104 | 0 | 0 | 0 | 1 Ref      |
| MK165657  | Unassigned | Unassigned | Unassigned | 749_0  | Clustered           | 40 VC_749_0  | 40  | 0.7517 | 1          | 0.7517 | 0 | 0 | 0 | 1 Ref      |
| MK165658  | Unassigned | Unassigned | Unassigned | 749_0  | Clustered           | 40 VC_749_0  | 40  | 0.7517 | 1          | 0.7517 | 0 | 0 | 0 | 1 Ref      |
| MK170160  | Unassigned | Unassigned | Unassigned | 700_0  | Clustered           | 10 VC_700_0  | 10  | 0.8076 | 1          | 0.8076 | 0 | 0 | 0 | 1 Ref      |
| MK170446  | Unassigned | Unassigned | Unassigned | 938_0  | Clustered           | 99 VC_938_0  | 99  | 0.9119 | 1          | 0.9119 | 0 | 0 | 0 | 0.9928 Ref |
| MK202159  | Unassigned | Unassigned | Unassigned | 255_0  | Clustered           | 13 VC_255_0  | 13  | 0.2048 | 1          | 0.2048 | 0 | 0 | 0 | 1 Ref      |
| MK202160  | Unassigned | Unassigned | Unassigned | 255_0  | Clustered           | 13 VC_255_0  | 13  | 0.2048 | 1          | 0.2048 | 0 | 0 | 0 | 1 Ref      |
| MK202161  | Unassigned | Unassigned | Unassigned | 255_0  | Clustered           | 13 VC_255_0  | 13  | 0.2048 | 1          | 0.2048 | 0 | 0 | 0 | 1 Ref      |
| MK203841  | Unassigned | Unassigned | Unassigned | 823_0  | Clustered           | 124 VC_823_0 | 124 | 0.9492 | 1          | 0.9492 | 0 | 0 | 0 | 1 Ref      |
| MK211557  | Unassigned | Unassigned | Unassigned | 12_2   | Clustered           | 19 VC_12_2   | 19  | 0.2018 | 1          | 0.2018 | 0 | 0 | 0 | 1 Ref      |
| MK213795  | Unassigned | Unassigned | Unassigned | 315_0  | Clustered           | 12 VC_315_0  | 12  | 0.8947 | 1          | 0.8947 | 0 | 0 | 0 | 1 Ref      |
| MK213796  | Unassigned | Unassigned | Unassigned | 575_0  | Clustered           | 35 VC_575_0  | 35  | 0.8815 | 1          | 0.8815 | 0 | 0 | 0 | 1 Ref      |
| MK214385  | Unassigned | Unassigned | Unassigned | 540_0  | Clustered           | 15 VC_540_0  | 15  | 0.2866 | 1          | 0.2866 | 0 | 0 | 0 | 1 Ref      |



|          |            |            |            |        |                     |              |     |        |            |        |   |   |   |            |
|----------|------------|------------|------------|--------|---------------------|--------------|-----|--------|------------|--------|---|---|---|------------|
| MK215646 | Unassigned | Unassigned | Unassigned | 883_0  | Clustered           | 10 VC_883_0  | 10  | 0.2015 | 1          | 0.2015 | 0 | 0 | 0 | 1 Ref      |
| MK224497 | Unassigned | Unassigned | Unassigned | 234_0  | Clustered           | 21 VC_234_0  | 21  | 0.8355 | 1          | 0.8355 | 0 | 0 | 0 | 1 Ref      |
| MK224498 | Unassigned | Unassigned | Unassigned | 76_0   | Clustered           | 37 VC_76_0   | 37  | 0.9403 | 1          | 0.9403 | 0 | 0 | 0 | 1 Ref      |
| MK224592 | Unassigned | Unassigned | Unassigned | 520_95 | Clustered/Singleton | 1 VC_520_95  | 1   | 0      | 1          | 0      | 0 | 0 | 0 | 1 Ref      |
| MK234886 | Unassigned | Unassigned | Unassigned | 290_5  | Clustered           | 14 VC_290_5  | 14  | 0.1422 | 1          | 0.1422 | 0 | 0 | 0 | 0.9231 Ref |
| MK238400 | Unassigned | Unassigned | Unassigned | 673_0  | Clustered           | 15 VC_673_0  | 15  | 0.8234 | 1          | 0.8234 | 0 | 0 | 0 | 0.7619 Ref |
| MK240351 | Unassigned | Unassigned | Unassigned | 492_0  | Clustered           | 2 VC_492_0   | 2   | 0.0158 | 0.6640397  | 0.0105 | 0 | 0 | 0 | 1 Ref      |
| MK240575 | Unassigned | Unassigned | Unassigned | 1351_0 | Clustered           | 2 VC_1351_0  | 2   | 1      | 1          | 1      | 0 | 0 | 0 | 1 Ref      |
| MK249126 | Unassigned | Unassigned | Unassigned | 637_0  | Clustered           | 115 VC_637_0 | 115 | 0.731  | 1          | 0.731  | 0 | 0 | 0 | 0.8764 Ref |
| MK249127 | Unassigned | Unassigned | Unassigned | 1066_0 | Clustered           | 52 VC_1066_0 | 52  | 0.7682 | 1          | 0.7682 | 0 | 0 | 0 | 1 Ref      |
| MK249128 | Unassigned | Unassigned | Unassigned | 1066_0 | Clustered           | 52 VC_1066_0 | 52  | 0.7682 | 1          | 0.7682 | 0 | 0 | 0 | 1 Ref      |
| MK249129 | Unassigned | Unassigned | Unassigned | 1066_0 | Clustered           | 52 VC_1066_0 | 52  | 0.7682 | 1          | 0.7682 | 0 | 0 | 0 | 1 Ref      |
| MK249131 | Unassigned | Unassigned | Unassigned | 1000_0 | Clustered           | 21 VC_1000_0 | 21  | 0.8437 | 0.99999998 | 0.8437 | 0 | 0 | 0 | 1 Ref      |
| MK249132 | Unassigned | Unassigned | Unassigned | 1067_0 | Clustered           | 2 VC_1067_0  | 2   | 0.012  | 0.85807772 | 0.0103 | 0 | 0 | 0 | 1 Ref      |
| MK249133 | Unassigned | Unassigned | Unassigned | 1062_0 | Clustered           | 45 VC_1062_0 | 45  | 0.9734 | 0.50949847 | 0.4959 | 0 | 0 | 0 | 1 Ref      |
| MK249135 | Unassigned | Unassigned | Unassigned | 994_0  | Clustered/Singleton | 1 VC_994_0   | 1   | 0      | 1          | 0      | 0 | 0 | 0 | 1 Ref      |
| MK249138 | Unassigned | Unassigned | Unassigned | 1062_0 | Clustered           | 45 VC_1062_0 | 45  | 0.9734 | 0.50949847 | 0.4959 | 0 | 0 | 0 | 1 Ref      |
| MK249139 | Unassigned | Unassigned | Unassigned | 1066_0 | Clustered           | 52 VC_1066_0 | 52  | 0.7682 | 1          | 0.7682 | 0 | 0 | 0 | 1 Ref      |
| MK249141 | Unassigned | Unassigned | Unassigned | 995_0  | Clustered           | 69 VC_995_0  | 69  | 0.8547 | 1          | 0.8547 | 0 | 0 | 0 | 1 Ref      |
| MK249143 | Unassigned | Unassigned | Unassigned | 398_0  | Clustered           | 48 VC_398_0  | 48  | 0.4813 | 1          | 0.4813 | 0 | 0 | 0 | 1 Ref      |
| MK249144 | Unassigned | Unassigned | Unassigned | 1000_0 | Clustered           | 21 VC_1000_0 | 21  | 0.8437 | 0.99999998 | 0.8437 | 0 | 0 | 0 | 1 Ref      |
| MK249147 | Unassigned | Unassigned | Unassigned | 995_0  | Clustered           | 69 VC_995_0  | 69  | 0.8547 | 1          | 0.8547 | 0 | 0 | 0 | 1 Ref      |
| MK249148 | Unassigned | Unassigned | Unassigned | 1264_0 | Clustered           | 6 VC_1264_0  | 6   | 0.7062 | 0.92055725 | 0.6501 | 0 | 0 | 0 | 1 Ref      |
| MK249149 | Unassigned | Unassigned | Unassigned | 1066_0 | Clustered           | 52 VC_1066_0 | 52  | 0.7682 | 1          | 0.7682 | 0 | 0 | 0 | 1 Ref      |
| MK249150 | Unassigned | Unassigned | Unassigned | 1066_0 | Clustered           | 52 VC_1066_0 | 52  | 0.7682 | 1          | 0.7682 | 0 | 0 | 0 | 1 Ref      |
| MK249151 | Unassigned | Unassigned | Unassigned | 398_0  | Clustered           | 48 VC_398_0  | 48  | 0.4813 | 1          | 0.4813 | 0 | 0 | 0 | 1 Ref      |
| MK249153 | Unassigned | Unassigned | Unassigned | 1066_0 | Clustered           | 52 VC_1066_0 | 52  | 0.7682 | 1          | 0.7682 | 0 | 0 | 0 | 1 Ref      |
| MK249154 | Unassigned | Unassigned | Unassigned | 1066_0 | Clustered           | 52 VC_1066_0 | 52  | 0.7682 | 1          | 0.7682 | 0 | 0 | 0 | 1 Ref      |
| MK249155 | Unassigned | Unassigned | Unassigned | 1066_0 | Clustered           | 52 VC_1066_0 | 52  | 0.7682 | 1          | 0.7682 | 0 | 0 | 0 | 1 Ref      |
| MK249156 | Unassigned | Unassigned | Unassigned | 1000_0 | Clustered           | 21 VC_1000_0 | 21  | 0.8437 | 0.99999998 | 0.8437 | 0 | 0 | 0 | 1 Ref      |
| MK249158 | Unassigned | Unassigned | Unassigned | 1066_0 | Clustered           | 52 VC_1066_0 | 52  | 0.7682 | 1          | 0.7682 | 0 | 0 | 0 | 1 Ref      |
| MK249159 | Unassigned | Unassigned | Unassigned | 1000_0 | Clustered           | 21 VC_1000_0 | 21  | 0.8437 | 0.99999998 | 0.8437 | 0 | 0 | 0 | 1 Ref      |
| MK249160 | Unassigned | Unassigned | Unassigned | 1000_0 | Clustered           | 21 VC_1000_0 | 21  | 0.8437 | 0.99999998 | 0.8437 | 0 | 0 | 0 | 1 Ref      |
| MK249162 | Unassigned | Unassigned | Unassigned | 1066_0 | Clustered           | 52 VC_1066_0 | 52  | 0.7682 | 1          | 0.7682 | 0 | 0 | 0 | 1 Ref      |
| MK249163 | Unassigned | Unassigned | Unassigned | 1066_0 | Clustered           | 52 VC_1066_0 | 52  | 0.7682 | 1          | 0.7682 | 0 | 0 | 0 | 1 Ref      |
| MK249165 | Unassigned | Unassigned | Unassigned | 995_0  | Clustered           | 69 VC_995_0  | 69  | 0.8547 | 1          | 0.8547 | 0 | 0 | 0 | 1 Ref      |
| MK249166 | Unassigned | Unassigned | Unassigned | 1066_0 | Clustered           | 52 VC_1066_0 | 52  | 0.7682 | 1          | 0.7682 | 0 | 0 | 0 | 1 Ref      |
| MK249167 | Unassigned | Unassigned | Unassigned | 1000_0 | Clustered           | 21 VC_1000_0 | 21  | 0.8437 | 0.99999998 | 0.8437 | 0 | 0 | 0 | 1 Ref      |
| MK249168 | Unassigned | Unassigned | Unassigned | 1066_0 | Clustered           | 52 VC_1066_0 | 52  | 0.7682 | 1          | 0.7682 | 0 | 0 | 0 | 1 Ref      |
| MK249174 | Unassigned | Unassigned | Unassigned | 1066_0 | Clustered           | 52 VC_1066_0 | 52  | 0.7682 | 1          | 0.7682 | 0 | 0 | 0 | 1 Ref      |
| MK249176 | Unassigned | Unassigned | Unassigned | 1066_0 | Clustered           | 52 VC_1066_0 | 52  | 0.7682 | 1          | 0.7682 | 0 | 0 | 0 | 1 Ref      |
| MK249178 | Unassigned | Unassigned | Unassigned | 1066_0 | Clustered           | 52 VC_1066_0 | 52  | 0.7682 | 1          | 0.7682 | 0 | 0 | 0 | 1 Ref      |
| MK249179 | Unassigned | Unassigned | Unassigned | 1000_0 | Clustered           | 21 VC_1000_0 | 21  | 0.8437 | 0.99999998 | 0.8437 | 0 | 0 | 0 | 1 Ref      |
| MK249180 | Unassigned | Unassigned | Unassigned | 1066_0 | Clustered           | 52 VC_1066_0 | 52  | 0.7682 | 1          | 0.7682 | 0 | 0 | 0 | 1 Ref      |
| MK249181 | Unassigned | Unassigned | Unassigned | 1000_0 | Clustered           | 21 VC_1000_0 | 21  | 0.8437 | 0.99999998 | 0.8437 | 0 | 0 | 0 | 1 Ref      |
| MK249185 | Unassigned | Unassigned | Unassigned | 995_0  | Clustered           | 69 VC_995_0  | 69  | 0.8547 | 1          | 0.8547 | 0 | 0 | 0 | 1 Ref      |
| MK249188 | Unassigned | Unassigned | Unassigned | 1066_0 | Clustered           | 52 VC_1066_0 | 52  | 0.7682 | 1          | 0.7682 | 0 | 0 | 0 | 1 Ref      |
| MK249189 | Unassigned | Unassigned | Unassigned | 999_0  | Clustered           | 2 VC_999_0   | 2   | 0.0273 | 0.73989325 | 0.0202 | 0 | 0 | 0 | 1 Ref      |
| MK249190 | Unassigned | Unassigned | Unassigned | 995_0  | Clustered           | 69 VC_995_0  | 69  | 0.8547 | 1          | 0.8547 | 0 | 0 | 0 | 1 Ref      |
| MK249191 | Unassigned | Unassigned | Unassigned | 1062_0 | Clustered           | 45 VC_1062_0 | 45  | 0.9734 | 0.50949847 | 0.4959 | 0 | 0 | 0 | 1 Ref      |
| MK249192 | Unassigned | Unassigned | Unassigned | 1066_0 | Clustered           | 52 VC_1066_0 | 52  | 0.7682 | 1          | 0.7682 | 0 | 0 | 0 | 1 Ref      |
| MK249194 | Unassigned | Unassigned | Unassigned | 1066_0 | Clustered           | 52 VC_1066_0 | 52  | 0.7682 | 1          | 0.7682 | 0 | 0 | 0 | 1 Ref      |
| MK249195 | Unassigned | Unassigned | Unassigned | 1066_0 | Clustered           | 52 VC_1066_0 | 52  | 0.7682 | 1          | 0.7682 | 0 | 0 | 0 | 1 Ref      |
| MK249196 | Unassigned | Unassigned | Unassigned | 1066_0 | Clustered           | 52 VC_1066_0 | 52  | 0.7682 | 1          | 0.7682 | 0 | 0 | 0 | 1 Ref      |
| MK249197 | Unassigned | Unassigned | Unassigned | 995_0  | Clustered           | 69 VC_995_0  | 69  | 0.8547 | 1          | 0.8547 | 0 | 0 | 0 | 1 Ref      |
| MK249198 | Unassigned | Unassigned | Unassigned | 1066_0 | Clustered           | 52 VC_1066_0 | 52  | 0.7682 | 1          | 0.7682 | 0 | 0 | 0 | 1 Ref      |
| MK249199 | Unassigned | Unassigned | Unassigned | 1062_0 | Clustered           | 45 VC_1062_0 | 45  | 0.9734 | 0.50949847 | 0.4959 | 0 | 0 | 0 | 1 Ref      |
| MK249201 | Unassigned | Unassigned | Unassigned | 995_0  | Clustered           | 69 VC_995_0  | 69  | 0.8547 | 1          | 0.8547 | 0 | 0 | 0 | 1 Ref      |
| MK249202 | Unassigned | Unassigned | Unassigned | 995_0  | Clustered           | 69 VC_995_0  | 69  | 0.8547 | 1          | 0.8547 | 0 | 0 | 0 | 1 Ref      |
| MK249203 | Unassigned | Unassigned | Unassigned | 995_0  | Clustered           | 69 VC_995_0  | 69  | 0.8547 | 1          | 0.8547 | 0 | 0 | 0 | 1 Ref      |
| MK249204 | Unassigned | Unassigned | Unassigned | 1066_0 | Clustered           | 52 VC_1066_0 | 52  | 0.7682 | 1          | 0.7682 | 0 | 0 | 0 | 1 Ref      |
| MK249205 | Unassigned | Unassigned | Unassigned | 1067_0 | Clustered           | 2 VC_1067_0  | 2   | 0.012  | 0.85807772 | 0.0103 | 0 | 0 | 0 | 1 Ref      |
| MK249207 | Unassigned | Unassigned | Unassigned | 1062_0 | Clustered           | 45 VC_1062_0 | 45  | 0.9734 | 0.50949847 | 0.4959 | 0 | 0 | 0 | 1 Ref      |
| MK249208 | Unassigned | Unassigned | Unassigned | 1062_0 | Clustered           | 45 VC_1062_0 | 45  | 0.9734 | 0.50949847 | 0.4959 | 0 | 0 | 0 | 1 Ref      |
| MK249211 | Unassigned | Unassigned | Unassigned | 995_0  | Clustered           | 69 VC_995_0  | 69  | 0.8547 | 1          | 0.8547 | 0 | 0 | 0 | 1 Ref      |
| MK249212 | Unassigned | Unassigned | Unassigned | 1066_0 | Clustered           | 52 VC_1066_0 | 52  | 0.7682 | 1          | 0.7682 | 0 | 0 | 0 | 1 Ref      |
| MK249213 | Unassigned | Unassigned | Unassigned | 995_0  | Clustered           | 69 VC_995_0  | 69  | 0.8547 | 1          | 0.8547 | 0 | 0 | 0 | 1 Ref      |
| MK249214 | Unassigned | Unassigned | Unassigned | 1066_0 | Clustered           | 52 VC_1066_0 | 52  | 0.7682 | 1          | 0.7682 | 0 | 0 | 0 | 1 Ref      |
| MK249215 | Unassigned | Unassigned | Unassigned | 1087_0 | Clustered           | 5 VC_1087_0  | 5   | 0.8109 | 0.98759579 | 0.8008 | 0 | 0 | 0 | 1 Ref      |
| MK249216 | Unassigned | Unassigned | Unassigned | 1364_0 | Clustered           | 3 VC_1364_0  | 3   | 1      | 1          | 1      | 0 | 0 | 0 | 1 Ref      |
| MK249217 | Unassigned | Unassigned | Unassigned | 1364_0 | Clustered           | 3 VC_1364_0  | 3   | 1      | 1          | 1      | 0 | 0 | 0 | 1 Ref      |
| MK249218 | Unassigned | Unassigned | Unassigned | 1339_0 | Clustered           | 7 VC_1339_0  | 7   | 0.9177 | 0.99772305 | 0.9156 | 0 | 0 | 0 | 1 Ref      |
| MK249219 | Unassigned | Unassigned | Unassigned | 1066_0 | Clustered           | 52 VC_1066_0 | 52  | 0.7682 | 1          | 0.7682 | 0 | 0 | 0 | 1 Ref      |
| MK249221 | Unassigned | Unassigned | Unassigned | 995_0  | Clustered           | 69 VC_995_0  | 69  | 0.8547 | 1          | 0.8547 | 0 | 0 | 0 | 1 Ref      |
| MK249222 | Unassigned | Unassigned | Unassigned | 1068_0 | Clustered           | 5 VC_1068_0  | 5   | 1      | 1          | 1      | 0 | 0 | 0 | 1 Ref      |
| MK249223 | Unassigned | Unassigned | Unassigned | 398_0  | Clustered           | 48 VC_398_0  | 48  | 0.4813 | 1          | 0.4813 | 0 | 0 | 0 | 1 Ref      |
| MK249228 | Unassigned | Unassigned | Unassigned | 1062_0 | Clustered           | 45 VC_1062_0 | 45  | 0.9734 | 0.50949847 | 0.4959 | 0 | 0 | 0 | 1 Ref      |
| MK249229 | Unassigned | Unassigned | Unassigned | 1339_0 | Clustered           | 7 VC_1339_0  | 7   | 0.9177 | 0.99772305 | 0.9156 | 0 | 0 | 0 | 1 Ref      |
| MK249231 | Unassigned | Unassigned | Unassigned | 398_0  | Clustered           | 48 VC_398_0  | 48  | 0.4813 | 1          | 0.4813 | 0 | 0 | 0 | 1 Ref      |
| MK249232 | Unassigned | Unassigned | Unassigned | 1062_0 | Clustered           | 45 VC_1062_0 | 45  | 0.9734 | 0.50949847 | 0.4959 | 0 | 0 | 0 | 1 Ref      |
| MK249233 | Unassigned | Unassigned | Unassigned | 1339_0 | Clustered           | 7 VC_1339_0  | 7   | 0.9177 | 0.99772305 | 0.9156 | 0 | 0 | 0 | 1 Ref      |



|          |            |            |            |        |           |              |    |        |            |        |   |   |   |   |            |
|----------|------------|------------|------------|--------|-----------|--------------|----|--------|------------|--------|---|---|---|---|------------|
| MK249308 | Unassigned | Unassigned | Unassigned | 592_0  | Clustered | 50 VC_592_0  | 50 | 0.7314 | 1          | 0.7314 | 0 | 0 | 0 | 0 | 1 Ref      |
| MK249872 | Unassigned | Unassigned | Unassigned | 643_0  | Clustered | 2 VC_643_0   | 2  | 0.1092 | 0.95085347 | 0.1038 | 0 | 0 | 0 | 0 | 1 Ref      |
| MK250015 | Unassigned | Unassigned | Unassigned | 1210_2 | Clustered | 4 VC_1210_2  | 4  | 0.1183 | 0.92062211 | 0.109  | 0 | 0 | 0 | 0 | 1 Ref      |
| MK250016 | Unassigned | Unassigned | Unassigned | 1210_2 | Clustered | 4 VC_1210_2  | 4  | 0.1183 | 0.92062211 | 0.109  | 0 | 0 | 0 | 0 | 1 Ref      |
| MK250017 | Unassigned | Unassigned | Unassigned | 1210_2 | Clustered | 4 VC_1210_2  | 4  | 0.1183 | 0.92062211 | 0.109  | 0 | 0 | 0 | 0 | 1 Ref      |
| MK250018 | Unassigned | Unassigned | Unassigned | 1210_2 | Clustered | 4 VC_1210_2  | 4  | 0.1183 | 0.92062211 | 0.109  | 0 | 0 | 0 | 0 | 1 Ref      |
| MK250019 | Unassigned | Unassigned | Unassigned | 1210_3 | Clustered | 2 VC_1210_3  | 2  | 0.0366 | 0.68120968 | 0.0249 | 0 | 0 | 0 | 0 | 1 Ref      |
| MK250020 | Unassigned | Unassigned | Unassigned | 1210_1 | Clustered | 7 VC_1210_1  | 7  | 0.2693 | 0.99874141 | 0.2689 | 0 | 0 | 0 | 0 | 1 Ref      |
| MK250021 | Unassigned | Unassigned | Unassigned | 1210_0 | Clustered | 2 VC_1210_0  | 2  | 0.0367 | 0.68120968 | 0.025  | 0 | 0 | 0 | 0 | 1 Ref      |
| MK250022 | Unassigned | Unassigned | Unassigned | 1210_1 | Clustered | 7 VC_1210_1  | 7  | 0.2693 | 0.99874141 | 0.2689 | 0 | 0 | 0 | 0 | 1 Ref      |
| MK250023 | Unassigned | Unassigned | Unassigned | 1210_0 | Clustered | 2 VC_1210_0  | 2  | 0.0367 | 0.68120968 | 0.025  | 0 | 0 | 0 | 0 | 1 Ref      |
| MK250024 | Unassigned | Unassigned | Unassigned | 1210_1 | Clustered | 7 VC_1210_1  | 7  | 0.2693 | 0.99874141 | 0.2689 | 0 | 0 | 0 | 0 | 1 Ref      |
| MK250025 | Unassigned | Unassigned | Unassigned | 1210_1 | Clustered | 7 VC_1210_1  | 7  | 0.2693 | 0.99874141 | 0.2689 | 0 | 0 | 0 | 0 | 1 Ref      |
| MK250026 | Unassigned | Unassigned | Unassigned | 1210_1 | Clustered | 7 VC_1210_1  | 7  | 0.2693 | 0.99874141 | 0.2689 | 0 | 0 | 0 | 0 | 1 Ref      |
| MK250027 | Unassigned | Unassigned | Unassigned | 1210_1 | Clustered | 7 VC_1210_1  | 7  | 0.2693 | 0.99874141 | 0.2689 | 0 | 0 | 0 | 0 | 1 Ref      |
| MK250028 | Unassigned | Unassigned | Unassigned | 1210_1 | Clustered | 7 VC_1210_1  | 7  | 0.2693 | 0.99874141 | 0.2689 | 0 | 0 | 0 | 0 | 1 Ref      |
| MK250029 | Unassigned | Unassigned | Unassigned | 1210_3 | Clustered | 2 VC_1210_3  | 2  | 0.0366 | 0.68120968 | 0.0249 | 0 | 0 | 0 | 0 | 1 Ref      |
| MK250904 | Unassigned | Unassigned | Unassigned | 149_15 | Clustered | 16 VC_149_15 | 16 | 0.0788 | 1          | 0.0788 | 0 | 0 | 0 | 0 | 0.8083 Ref |
| MK257719 | Unassigned | Unassigned | Unassigned | 699_0  | Clustered | 71 VC_699_0  | 71 | 0.9352 | 1          | 0.9352 | 0 | 0 | 0 | 0 | 1 Ref      |
| MK257720 | Unassigned | Unassigned | Unassigned | 699_0  | Clustered | 71 VC_699_0  | 71 | 0.9352 | 1          | 0.9352 | 0 | 0 | 0 | 0 | 1 Ref      |
| MK257721 | Unassigned | Unassigned | Unassigned | 699_0  | Clustered | 71 VC_699_0  | 71 | 0.9352 | 1          | 0.9352 | 0 | 0 | 0 | 0 | 1 Ref      |
| MK257722 | Unassigned | Unassigned | Unassigned | 699_0  | Clustered | 71 VC_699_0  | 71 | 0.9352 | 1          | 0.9352 | 0 | 0 | 0 | 0 | 1 Ref      |
| MK257723 | Unassigned | Unassigned | Unassigned | 699_0  | Clustered | 71 VC_699_0  | 71 | 0.9352 | 1          | 0.9352 | 0 | 0 | 0 | 0 | 1 Ref      |
| MK257744 | Unassigned | Unassigned | Unassigned | 477_0  | Clustered | 4 VC_477_0   | 4  | 0.9836 | 0.99748973 | 0.9811 | 0 | 0 | 0 | 0 | 1 Ref      |
| MK268344 | Unassigned | Unassigned | Unassigned | 164_0  | Clustered | 3 VC_164_0   | 3  | 0.0298 | 0.82983726 | 0.0247 | 0 | 0 | 0 | 0 | 1 Ref      |
| MK268686 | Unassigned | Unassigned | Unassigned | 91_0   | Clustered | 22 VC_91_0   | 22 | 0.5318 | 1          | 0.5318 | 0 | 0 | 0 | 0 | 1 Ref      |
| MK278859 | Unassigned | Unassigned | Unassigned | 699_0  | Clustered | 71 VC_699_0  | 71 | 0.9352 | 1          | 0.9352 | 0 | 0 | 0 | 0 | 1 Ref      |
| MK278860 | Unassigned | Unassigned | Unassigned | 492_2  | Clustered | 8 VC_492_2   | 8  | 0.1221 | 0.98786574 | 0.1206 | 0 | 0 | 0 | 0 | 1 Ref      |
| MK278861 | Unassigned | Unassigned | Unassigned | 938_0  | Clustered | 99 VC_938_0  | 99 | 0.9119 | 1          | 0.9119 | 0 | 0 | 0 | 0 | 0.9928 Ref |
| MK279840 | Unassigned | Unassigned | Unassigned | 574_0  | Clustered | 7 VC_574_0   | 7  | 0.2734 | 1          | 0.2734 | 0 | 0 | 0 | 0 | 1 Ref      |
| MK279841 | Unassigned | Unassigned | Unassigned | 728_0  | Clustered | 3 VC_728_0   | 3  | 0.4017 | 0.99850259 | 0.4011 | 0 | 0 | 0 | 0 | 1 Ref      |
| MK279842 | Unassigned | Unassigned | Unassigned | 939_0  | Clustered | 15 VC_939_0  | 15 | 1      | 0          | 0      | 0 | 0 | 0 | 0 | 1 Ref      |
| MK279843 | Unassigned | Unassigned | Unassigned | 371_11 | Clustered | 31 VC_371_11 | 31 | 0.0927 | 1          | 0.0927 | 0 | 0 | 0 | 0 | 0.7011 Ref |
| MK279844 | Unassigned | Unassigned | Unassigned | 1160_0 | Clustered | 73 VC_1160_0 | 73 | 0.9835 | 1          | 0.9835 | 0 | 0 | 0 | 0 | 1 Ref      |
| MK279845 | Unassigned | Unassigned | Unassigned | 1160_0 | Clustered | 73 VC_1160_0 | 73 | 0.9835 | 1          | 0.9835 | 0 | 0 | 0 | 0 | 1 Ref      |
| MK279846 | Unassigned | Unassigned | Unassigned | 371_16 | Clustered | 42 VC_371_16 | 42 | 0.1341 | 1          | 0.1341 | 0 | 0 | 0 | 0 | 0.7282 Ref |
| MK279847 | Unassigned | Unassigned | Unassigned | 1160_0 | Clustered | 73 VC_1160_0 | 73 | 0.9835 | 1          | 0.9835 | 0 | 0 | 0 | 0 | 1 Ref      |
| MK279849 | Unassigned | Unassigned | Unassigned | 546_7  | Clustered | 4 VC_546_7   | 4  | 0.041  | 0.9963251  | 0.0408 | 0 | 0 | 0 | 0 | 1 Ref      |
| MK279850 | Unassigned | Unassigned | Unassigned | 371_13 | Clustered | 33 VC_371_13 | 33 | 0.179  | 1          | 0.179  | 0 | 0 | 0 | 0 | 0.8769 Ref |
| MK279851 | Unassigned | Unassigned | Unassigned | 1160_0 | Clustered | 73 VC_1160_0 | 73 | 0.9835 | 1          | 0.9835 | 0 | 0 | 0 | 0 | 1 Ref      |
| MK279852 | Unassigned | Unassigned | Unassigned | 371_16 | Clustered | 42 VC_371_16 | 42 | 0.1341 | 1          | 0.1341 | 0 | 0 | 0 | 0 | 0.7282 Ref |
| MK279853 | Unassigned | Unassigned | Unassigned | 1096_0 | Clustered | 5 VC_1096_0  | 5  | 0.8566 | 0.99869977 | 0.8555 | 0 | 0 | 0 | 0 | 1 Ref      |
| MK279854 | Unassigned | Unassigned | Unassigned | 1160_0 | Clustered | 73 VC_1160_0 | 73 | 0.9835 | 1          | 0.9835 | 0 | 0 | 0 | 0 | 1 Ref      |
| MK279855 | Unassigned | Unassigned | Unassigned | 371_15 | Clustered | 44 VC_371_15 | 44 | 0.1391 | 1          | 0.1391 | 0 | 0 | 0 | 0 | 0.7474 Ref |
| MK279856 | Unassigned | Unassigned | Unassigned | 1160_0 | Clustered | 73 VC_1160_0 | 73 | 0.9835 | 1          | 0.9835 | 0 | 0 | 0 | 0 | 1 Ref      |
| MK279857 | Unassigned | Unassigned | Unassigned | 217_0  | Clustered | 5 VC_217_0   | 5  | 0.069  | 0.99999998 | 0.069  | 0 | 0 | 0 | 0 | 1 Ref      |
| MK279858 | Unassigned | Unassigned | Unassigned | 371_13 | Clustered | 33 VC_371_13 | 33 | 0.179  | 1          | 0.179  | 0 | 0 | 0 | 0 | 0.8769 Ref |
| MK279859 | Unassigned | Unassigned | Unassigned | 371_15 | Clustered | 44 VC_371_15 | 44 | 0.1391 | 1          | 0.1391 | 0 | 0 | 0 | 0 | 0.7474 Ref |
| MK279860 | Unassigned | Unassigned | Unassigned | 1160_0 | Clustered | 73 VC_1160_0 | 73 | 0.9835 | 1          | 0.9835 | 0 | 0 | 0 | 0 | 1 Ref      |
| MK279861 | Unassigned | Unassigned | Unassigned | 371_15 | Clustered | 44 VC_371_15 | 44 | 0.1391 | 1          | 0.1391 | 0 | 0 | 0 | 0 | 0.7474 Ref |
| MK279862 | Unassigned | Unassigned | Unassigned | 1160_0 | Clustered | 73 VC_1160_0 | 73 | 0.9835 | 1          | 0.9835 | 0 | 0 | 0 | 0 | 1 Ref      |
| MK279863 | Unassigned | Unassigned | Unassigned | 1160_0 | Clustered | 73 VC_1160_0 | 73 | 0.9835 | 1          | 0.9835 | 0 | 0 | 0 | 0 | 1 Ref      |
| MK279864 | Unassigned | Unassigned | Unassigned | 371_13 | Clustered | 33 VC_371_13 | 33 | 0.179  | 1          | 0.179  | 0 | 0 | 0 | 0 | 0.8769 Ref |
| MK279865 | Unassigned | Unassigned | Unassigned | 371_11 | Clustered | 31 VC_371_11 | 31 | 0.0927 | 1          | 0.0927 | 0 | 0 | 0 | 0 | 0.7011 Ref |
| MK279866 | Unassigned | Unassigned | Unassigned | 371_15 | Clustered | 44 VC_371_15 | 44 | 0.1391 | 1          | 0.1391 | 0 | 0 | 0 | 0 | 0.7474 Ref |
| MK279867 | Unassigned | Unassigned | Unassigned | 1160_0 | Clustered | 73 VC_1160_0 | 73 | 0.9835 | 1          | 0.9835 | 0 | 0 | 0 | 0 | 1 Ref      |
| MK279868 | Unassigned | Unassigned | Unassigned | 1160_0 | Clustered | 73 VC_1160_0 | 73 | 0.9835 | 1          | 0.9835 | 0 | 0 | 0 | 0 | 1 Ref      |
| MK279869 | Unassigned | Unassigned | Unassigned | 1160_0 | Clustered | 73 VC_1160_0 | 73 | 0.9835 | 1          | 0.9835 | 0 | 0 | 0 | 0 | 1 Ref      |
| MK279870 | Unassigned | Unassigned | Unassigned | 371_11 | Clustered | 31 VC_371_11 | 31 | 0.0927 | 1          | 0.0927 | 0 | 0 | 0 | 0 | 0.7011 Ref |
| MK279871 | Unassigned | Unassigned | Unassigned | 371_16 | Clustered | 42 VC_371_16 | 42 | 0.1341 | 1          | 0.1341 | 0 | 0 | 0 | 0 | 0.7282 Ref |
| MK279872 | Unassigned | Unassigned | Unassigned | 1160_0 | Clustered | 73 VC_1160_0 | 73 | 0.9835 | 1          | 0.9835 | 0 | 0 | 0 | 0 | 1 Ref      |
| MK279873 | Unassigned | Unassigned | Unassigned | 371_11 | Clustered | 31 VC_371_11 | 31 | 0.0927 | 1          | 0.0927 | 0 | 0 | 0 | 0 | 0.7011 Ref |
| MK279874 | Unassigned | Unassigned | Unassigned | 1160_0 | Clustered | 73 VC_1160_0 | 73 | 0.9835 | 1          | 0.9835 | 0 | 0 | 0 | 0 | 1 Ref      |
| MK279875 | Unassigned | Unassigned | Unassigned | 1160_0 | Clustered | 73 VC_1160_0 | 73 | 0.9835 | 1          | 0.9835 | 0 | 0 | 0 | 0 | 1 Ref      |
| MK279876 | Unassigned | Unassigned | Unassigned | 1160_0 | Clustered | 73 VC_1160_0 | 73 | 0.9835 | 1          | 0.9835 | 0 | 0 | 0 | 0 | 1 Ref      |
| MK279877 | Unassigned | Unassigned | Unassigned | 371_3  | Clustered | 22 VC_371_3  | 22 | 0.0787 | 1          | 0.0787 | 0 | 0 | 0 | 0 | 0.9048 Ref |
| MK279878 | Unassigned | Unassigned | Unassigned | 371_11 | Clustered | 31 VC_371_11 | 31 | 0.0927 | 1          | 0.0927 | 0 | 0 | 0 | 0 | 0.7011 Ref |
| MK279879 | Unassigned | Unassigned | Unassigned | 371_15 | Clustered | 44 VC_371_15 | 44 | 0.1391 | 1          | 0.1391 | 0 | 0 | 0 | 0 | 0.7474 Ref |
| MK279880 | Unassigned | Unassigned | Unassigned | 1160_0 | Clustered | 73 VC_1160_0 | 73 | 0.9835 | 1          | 0.9835 | 0 | 0 | 0 | 0 | 1 Ref      |
| MK279881 | Unassigned | Unassigned | Unassigned | 371_15 | Clustered | 44 VC_371_15 | 44 | 0.1391 | 1          | 0.1391 | 0 | 0 | 0 | 0 | 0.7474 Ref |
| MK279882 | Unassigned | Unassigned | Unassigned | 371_15 | Clustered | 44 VC_371_15 | 44 | 0.1391 | 1          | 0.1391 | 0 | 0 | 0 | 0 | 0.7474 Ref |
| MK279883 | Unassigned | Unassigned | Unassigned | 371_13 | Clustered | 33 VC_371_13 | 33 | 0.179  | 1          | 0.179  | 0 | 0 | 0 | 0 | 0.8769 Ref |
| MK279884 | Unassigned | Unassigned | Unassigned | 1160_0 | Clustered | 73 VC_1160_0 | 73 | 0.9835 | 1          | 0.9835 | 0 | 0 | 0 | 0 | 1 Ref      |
| MK279885 | Unassigned | Unassigned | Unassigned | 371_15 | Clustered | 44 VC_371_15 | 44 | 0.1391 | 1          | 0.1391 | 0 | 0 | 0 | 0 | 0.7474 Ref |
| MK279886 | Unassigned | Unassigned | Unassigned | 1160_0 | Clustered | 73 VC_1160_0 | 73 | 0.9835 | 1          | 0.9835 | 0 | 0 | 0 | 0 | 1 Ref      |
| MK279887 | Unassigned | Unassigned | Unassigned | 371_15 | Clustered | 44 VC_371_15 | 44 | 0.1391 | 1          | 0.1391 | 0 | 0 | 0 | 0 | 0.7474 Ref |
| MK279888 | Unassigned | Unassigned | Unassigned | 371_15 | Clustered | 44 VC_371_15 | 44 | 0.1391 | 1          | 0.1391 | 0 | 0 | 0 | 0 | 0.7474 Ref |
| MK279889 | Unassigned | Unassigned | Unassigned | 371_2  | Clustered | 8 VC_371_2   | 8  | 0.0232 | 1          | 0.0232 | 0 | 0 | 0 | 0 | 0.8571 Ref |
| MK279890 | Unassigned | Unassigned | Unassigned | 371_13 | Clustered | 33 VC_371_13 | 33 | 0.179  | 1          | 0.179  | 0 | 0 | 0 | 0 | 0.8769 Ref |
| MK279891 | Unassigned | Unassigned | Unassigned | 371_13 | Clustered | 33 VC_371_13 | 33 | 0.179  | 1          | 0.179  | 0 | 0 | 0 | 0 | 0.8769 Ref |
| MK279892 | Unassigned | Unassigned | Unassigned | 1160_0 | Clustered | 73 VC_1160_0 | 73 | 0.9835 | 1          | 0.9835 | 0 | 0 | 0 | 0 | 1 Ref      |



|          |            |            |            |         |                     |              |     |        |            |        |   |   |   |            |
|----------|------------|------------|------------|---------|---------------------|--------------|-----|--------|------------|--------|---|---|---|------------|
| MK279893 | Unassigned | Unassigned | Unassigned | 954_0   | Clustered           | 13 VC_954_0  | 13  | 0.863  | 1          | 0.863  | 0 | 0 | 0 | 1 Ref      |
| MK279894 | Unassigned | Unassigned | Unassigned | 371_11  | Clustered           | 31 VC_371_11 | 31  | 0.0927 | 1          | 0.0927 | 0 | 0 | 0 | 0.7011 Ref |
| MK279895 | Unassigned | Unassigned | Unassigned | 371_11  | Clustered           | 31 VC_371_11 | 31  | 0.0927 | 1          | 0.0927 | 0 | 0 | 0 | 0.7011 Ref |
| MK279896 | Unassigned | Unassigned | Unassigned | 1160_0  | Clustered           | 73 VC_1160_0 | 73  | 0.9835 | 1          | 0.9835 | 0 | 0 | 0 | 1 Ref      |
| MK279897 | Unassigned | Unassigned | Unassigned | 371_11  | Clustered           | 31 VC_371_11 | 31  | 0.0927 | 1          | 0.0927 | 0 | 0 | 0 | 0.7011 Ref |
| MK279898 | Unassigned | Unassigned | Unassigned | 517_0   | Clustered           | 18 VC_517_0  | 18  | 0.1599 | 1          | 0.1599 | 0 | 0 | 0 | 1 Ref      |
| MK279900 | Unassigned | Unassigned | Unassigned | 919_0   | Clustered           | 39 VC_919_0  | 39  | 0.9069 | 1          | 0.9069 | 0 | 0 | 0 | 1 Ref      |
| MK279901 | Unassigned | Unassigned | Unassigned | 1160_0  | Clustered           | 73 VC_1160_0 | 73  | 0.9835 | 1          | 0.9835 | 0 | 0 | 0 | 1 Ref      |
| MK279902 | Unassigned | Unassigned | Unassigned | 517_1   | Clustered           | 108 VC_517_1 | 108 | 0.8483 | 1          | 0.8483 | 0 | 0 | 0 | 0.9955 Ref |
| MK279903 | Unassigned | Unassigned | Unassigned | 514_0   | Clustered           | 75 VC_514_0  | 75  | 0.9402 | 1          | 0.9402 | 0 | 0 | 0 | 1 Ref      |
| MK279904 | Unassigned | Unassigned | Unassigned | 371_4   | Clustered           | 5 VC_371_4   | 5   | 0.0135 | 0.99999971 | 0.0135 | 0 | 0 | 0 | 1 Ref      |
| MK279905 | Unassigned | Unassigned | Unassigned | 887_0   | Clustered           | 18 VC_887_0  | 18  | 0.3663 | 1          | 0.3663 | 0 | 0 | 0 | 1 Ref      |
| MK279906 | Unassigned | Unassigned | Unassigned | 557_1   | Clustered           | 11 VC_557_1  | 11  | 0.4945 | 1          | 0.4945 | 0 | 0 | 0 | 0.7818 Ref |
| MK279907 | Unassigned | Unassigned | Unassigned | 1160_0  | Clustered           | 73 VC_1160_0 | 73  | 0.9835 | 1          | 0.9835 | 0 | 0 | 0 | 1 Ref      |
| MK279908 | Unassigned | Unassigned | Unassigned | 371_3   | Clustered           | 22 VC_371_3  | 22  | 0.0787 | 1          | 0.0787 | 0 | 0 | 0 | 0.9048 Ref |
| MK279909 | Unassigned | Unassigned | Unassigned | 566_0   | Clustered           | 2 VC_566_0   | 2   | 0.0989 | 0.95622526 | 0.0945 | 0 | 0 | 0 | 1 Ref      |
| MK279910 | Unassigned | Unassigned | Unassigned | 371_1   | Clustered           | 11 VC_371_1  | 11  | 0.0379 | 1          | 0.0379 | 0 | 0 | 0 | 0.8545 Ref |
| MK279911 | Unassigned | Unassigned | Unassigned | 1175_0  | Clustered           | 22 VC_1175_0 | 22  | 0.4562 | 1          | 0.4562 | 0 | 0 | 0 | 1 Ref      |
| MK279912 | Unassigned | Unassigned | Unassigned | 1175_0  | Clustered           | 22 VC_1175_0 | 22  | 0.4562 | 1          | 0.4562 | 0 | 0 | 0 | 1 Ref      |
| MK279913 | Unassigned | Unassigned | Unassigned | 514_0   | Clustered           | 75 VC_514_0  | 75  | 0.9402 | 1          | 0.9402 | 0 | 0 | 0 | 1 Ref      |
| MK284518 | Unassigned | Unassigned | Unassigned | 514_0   | Clustered           | 75 VC_514_0  | 75  | 0.9402 | 1          | 0.9402 | 0 | 0 | 0 | 1 Ref      |
| MK284519 | Unassigned | Unassigned | Unassigned | 513_0   | Clustered           | 32 VC_513_0  | 32  | 0.6881 | 1          | 0.6881 | 0 | 0 | 0 | 1 Ref      |
| MK284520 | Unassigned | Unassigned | Unassigned | 685_0   | Clustered           | 16 VC_685_0  | 16  | 0.2972 | 1          | 0.2972 | 0 | 0 | 0 | 0.9167 Ref |
| MK284521 | Unassigned | Unassigned | Unassigned | 1177_0  | Clustered           | 14 VC_1177_0 | 14  | 0.7847 | 1          | 0.7847 | 0 | 0 | 0 | 0.989 Ref  |
| MK284522 | Unassigned | Unassigned | Unassigned | 216_4   | Clustered           | 13 VC_216_4  | 13  | 0.1657 | 1          | 0.1657 | 0 | 0 | 0 | 1 Ref      |
| MK284526 | Unassigned | Unassigned | Unassigned | 818_0   | Clustered           | 20 VC_818_0  | 20  | 0.9601 | 1          | 0.9601 | 0 | 0 | 0 | 1 Ref      |
| MK284527 | Unassigned | Unassigned | Unassigned | 818_0   | Clustered           | 20 VC_818_0  | 20  | 0.9601 | 1          | 0.9601 | 0 | 0 | 0 | 1 Ref      |
| MK284528 | Unassigned | Unassigned | Unassigned | 818_0   | Clustered           | 20 VC_818_0  | 20  | 0.9601 | 1          | 0.9601 | 0 | 0 | 0 | 1 Ref      |
| MK286578 | Unassigned | Unassigned | Unassigned | 592_0   | Clustered           | 50 VC_592_0  | 50  | 0.7314 | 1          | 0.7314 | 0 | 0 | 0 | 1 Ref      |
| MK288021 | Unassigned | Unassigned | Unassigned | 475_8   | Clustered           | 2 VC_475_8   | 2   | 0.0291 | 0.90184699 | 0.0262 | 0 | 0 | 0 | 1 Ref      |
| MK288022 | Unassigned | Unassigned | Unassigned | 1006_0  | Clustered           | 8 VC_1006_0  | 8   | 0.7407 | 1          | 0.7407 | 0 | 0 | 0 | 1 Ref      |
| MK290737 | Unassigned | Unassigned | Unassigned | 331_0   | Clustered           | 4 VC_331_0   | 4   | 0.0884 | 0.99998775 | 0.0884 | 0 | 0 | 0 | 1 Ref      |
| MK290738 | Unassigned | Unassigned | Unassigned | 331_0   | Clustered           | 4 VC_331_0   | 4   | 0.0884 | 0.99998775 | 0.0884 | 0 | 0 | 0 | 1 Ref      |
| MK290764 | Unassigned | Unassigned | Unassigned | 12_0    | Clustered           | 21 VC_12_0   | 21  | 0.2274 | 1          | 0.2274 | 0 | 0 | 0 | 0.9571 Ref |
| MK291441 | Unassigned | Unassigned | Unassigned | 922_0   | Clustered           | 2 VC_922_0   | 2   | 0.42   | 0.90478487 | 0.38   | 0 | 0 | 0 | 1 Ref      |
| MK291443 | Unassigned | Unassigned | Unassigned | 922_0   | Clustered           | 2 VC_922_0   | 2   | 0.42   | 0.90478487 | 0.38   | 0 | 0 | 0 | 1 Ref      |
| MK295203 | Unassigned | Unassigned | Unassigned | 290_7   | Clustered/Singleton | 1 VC_290_7   | 1   | 0      | 0          | 0      | 0 | 0 | 0 | 1 Ref      |
| MK295204 | Unassigned | Unassigned | Unassigned | 288_2   | Clustered           | 2 VC_288_2   | 2   | 0.0228 | 0.95538559 | 0.0218 | 0 | 0 | 0 | 1 Ref      |
| MK301437 | Unassigned | Unassigned | Unassigned | 202_0   | Clustered           | 102 VC_202_0 | 102 | 0.4049 | 1          | 0.4049 | 0 | 0 | 0 | 0.7876 Ref |
| MK301442 | Unassigned | Unassigned | Unassigned | 690_0   | Clustered           | 50 VC_690_0  | 50  | 0.9805 | 1          | 0.9805 | 0 | 0 | 0 | 1 Ref      |
| MK301443 | Unassigned | Unassigned | Unassigned | 690_0   | Clustered           | 50 VC_690_0  | 50  | 0.9805 | 1          | 0.9805 | 0 | 0 | 0 | 1 Ref      |
| MK301532 | Unassigned | Unassigned | Unassigned | 451_0   | Clustered           | 80 VC_451_0  | 80  | 0.9991 | 1          | 0.9991 | 0 | 0 | 0 | 1 Ref      |
| MK305884 | Unassigned | Unassigned | Unassigned | 761_0   | Clustered           | 67 VC_761_0  | 67  | 0.8947 | 1          | 0.8947 | 0 | 0 | 0 | 1 Ref      |
| MK305885 | Unassigned | Unassigned | Unassigned | 954_0   | Clustered           | 13 VC_954_0  | 13  | 0.863  | 1          | 0.863  | 0 | 0 | 0 | 1 Ref      |
| MK305887 | Unassigned | Unassigned | Unassigned | 940_0   | Clustered           | 34 VC_940_0  | 34  | 0.7959 | 1          | 0.7959 | 0 | 0 | 0 | 1 Ref      |
| MK305888 | Unassigned | Unassigned | Unassigned | 727_0   | Clustered           | 11 VC_727_0  | 11  | 0.5054 | 1          | 0.5054 | 0 | 0 | 0 | 1 Ref      |
| MK305889 | Unassigned | Unassigned | Unassigned | 1178_0  | Clustered           | 24 VC_1178_0 | 24  | 0.9524 | 1          | 0.9524 | 0 | 0 | 0 | 1 Ref      |
| MK305890 | Unassigned | Unassigned | Unassigned | 1369_0  | Clustered           | 3 VC_1369_0  | 3   | 0.9809 | 0.9595722  | 0.9412 | 0 | 0 | 0 | 1 Ref      |
| MK305891 | Unassigned | Unassigned | Unassigned | 859_0   | Clustered           | 9 VC_859_0   | 9   | 0.9426 | 1          | 0.9426 | 0 | 0 | 0 | 1 Ref      |
| MK305892 | Unassigned | Unassigned | Unassigned | 939_0   | Clustered           | 15 VC_939_0  | 15  | 1      | 0          | 0      | 0 | 0 | 0 | 1 Ref      |
| MK305893 | Unassigned | Unassigned | Unassigned | 325_55  | Clustered           | 2 VC_325_55  | 2   | 0.0061 | 0.95750995 | 0.0058 | 0 | 0 | 0 | 1 Ref      |
| MK308637 | Unassigned | Unassigned | Unassigned | 1163_0  | Clustered           | 28 VC_1163_0 | 28  | 0.4923 | 1          | 0.4923 | 0 | 0 | 0 | 1 Ref      |
| MK308638 | Unassigned | Unassigned | Unassigned | 1360_0  | Clustered           | 31 VC_1360_0 | 31  | 0.8837 | 1          | 0.8837 | 0 | 0 | 0 | 1 Ref      |
| MK308674 | Unassigned | Unassigned | Unassigned | 346_0   | Clustered           | 4 VC_346_0   | 4   | 0.4606 | 0.99997905 | 0.4606 | 0 | 0 | 0 | 1 Ref      |
| MK308675 | Unassigned | Unassigned | Unassigned | 346_0   | Clustered           | 4 VC_346_0   | 4   | 0.4606 | 0.99997905 | 0.4606 | 0 | 0 | 0 | 1 Ref      |
| MK308676 | Unassigned | Unassigned | Unassigned | 346_0   | Clustered           | 4 VC_346_0   | 4   | 0.4606 | 0.99997905 | 0.4606 | 0 | 0 | 0 | 1 Ref      |
| MK308677 | Unassigned | Unassigned | Unassigned | 346_0   | Clustered           | 4 VC_346_0   | 4   | 0.4606 | 0.99997905 | 0.4606 | 0 | 0 | 0 | 1 Ref      |
| MK310138 | Unassigned | Unassigned | Unassigned | 237_0   | Clustered           | 4 VC_237_0   | 4   | 0.0429 | 0.99998759 | 0.0429 | 0 | 0 | 0 | 1 Ref      |
| MK310139 | Unassigned | Unassigned | Unassigned | 371_5   | Clustered           | 2 VC_371_5   | 2   | 0.0035 | 0.95771071 | 0.0033 | 0 | 0 | 0 | 1 Ref      |
| MK310140 | Unassigned | Unassigned | Unassigned | 514_0   | Clustered           | 75 VC_514_0  | 75  | 0.9402 | 1          | 0.9402 | 0 | 0 | 0 | 1 Ref      |
| MK310141 | Unassigned | Unassigned | Unassigned | 325_16  | Clustered           | 2 VC_325_16  | 2   | 0.0095 | 0.95751393 | 0.0091 | 0 | 0 | 0 | 1 Ref      |
| MK310142 | Unassigned | Unassigned | Unassigned | 325_61  | Clustered           | 8 VC_325_61  | 8   | 0.0395 | 1          | 0.0395 | 0 | 0 | 0 | 0.7857 Ref |
| MK310143 | Unassigned | Unassigned | Unassigned | 558_32  | Clustered/Singleton | 1 VC_558_32  | 1   | 0      | 1          | 0      | 0 | 0 | 0 | 1 Ref      |
| MK310144 | Unassigned | Unassigned | Unassigned | 887_0   | Clustered           | 18 VC_887_0  | 18  | 0.3663 | 1          | 0.3663 | 0 | 0 | 0 | 1 Ref      |
| MK310145 | Unassigned | Unassigned | Unassigned | 517_1   | Clustered           | 108 VC_517_1 | 108 | 0.8483 | 1          | 0.8483 | 0 | 0 | 0 | 0.9955 Ref |
| MK310146 | Unassigned | Unassigned | Unassigned | 761_0   | Clustered           | 67 VC_761_0  | 67  | 0.8947 | 1          | 0.8947 | 0 | 0 | 0 | 1 Ref      |
| MK310182 | Unassigned | Unassigned | Unassigned | 392_0   | Clustered           | 126 VC_392_0 | 126 | 0.9621 | 1          | 0.9621 | 0 | 0 | 0 | 1 Ref      |
| MK310183 | Unassigned | Unassigned | Unassigned | 813_0   | Clustered           | 12 VC_813_0  | 12  | 0.2347 | 1          | 0.2347 | 0 | 0 | 0 | 1 Ref      |
| MK310184 | Unassigned | Unassigned | Unassigned | 290_6   | Clustered           | 12 VC_290_6  | 12  | 0.1149 | 1          | 0.1149 | 0 | 0 | 0 | 0.8182 Ref |
| MK317959 | Unassigned | Unassigned | Unassigned | 80_0    | Clustered           | 41 VC_80_0   | 41  | 0.5837 | 1          | 0.5837 | 0 | 0 | 0 | 0.9805 Ref |
| MK318076 | Unassigned | Unassigned | Unassigned | 79_7    | Clustered           | 33 VC_79_7   | 33  | 0.216  | 1          | 0.216  | 0 | 0 | 0 | 0.8409 Ref |
| MK318083 | Unassigned | Unassigned | Unassigned | 195_1   | Clustered/Singleton | 1 VC_195_1   | 1   | 0      | 1          | 0      | 0 | 0 | 0 | 1 Ref      |
| MK327140 | Unassigned | Unassigned | Unassigned | 460_0   | Clustered           | 19 VC_460_0  | 19  | 0.3744 | 1          | 0.3744 | 0 | 0 | 0 | 1 Ref      |
| MK327928 | Unassigned | Unassigned | Unassigned | 283_18  | Clustered/Singleton | 1 VC_283_18  | 1   | 0      | 1          | 0      | 0 | 0 | 0 | 1 Ref      |
| MK327929 | Unassigned | Unassigned | Unassigned | 283_127 | Clustered/Singleton | 1 VC_283_127 | 1   | 0      | 1          | 0      | 0 | 0 | 0 | 1 Ref      |
| MK327930 | Unassigned | Unassigned | Unassigned | 772_19  | Clustered           | 16 VC_772_19 | 16  | 0.0975 | 0.9970466  | 0.0972 | 0 | 0 | 0 | 0.8083 Ref |
| MK327931 | Unassigned | Unassigned | Unassigned | 164_11  | Clustered           | 10 VC_164_11 | 10  | 0.1507 | 1          | 0.1507 | 0 | 0 | 0 | 0.9111 Ref |
| MK327932 | Unassigned | Unassigned | Unassigned | 590_0   | Clustered           | 27 VC_590_0  | 27  | 0.9947 | 1          | 0.9947 | 0 | 0 | 0 | 1 Ref      |
| MK327933 | Unassigned | Unassigned | Unassigned | 286_4   | Clustered/Singleton | 1 VC_286_4   | 1   | 0      | 1          | 0      | 0 | 0 | 0 | 1 Ref      |
| MK327934 | Unassigned | Unassigned | Unassigned | 286_1   | Clustered           | 21 VC_286_1  | 21  | 0.1696 | 1          | 0.1696 | 0 | 0 | 0 | 0.9048 Ref |
| MK327935 | Unassigned | Unassigned | Unassigned | 590_0   | Clustered           | 27 VC_590_0  | 27  | 0.9947 | 1          | 0.9947 | 0 | 0 | 0 | 1 Ref      |



|          |            |            |            |         |                     |              |     |        |            |        |   |   |   |            |
|----------|------------|------------|------------|---------|---------------------|--------------|-----|--------|------------|--------|---|---|---|------------|
| MK327936 | Unassigned | Unassigned | Unassigned | 283_133 | Clustered/Singleton | 1 VC_283_133 | 1   | 0      | 1          | 0      | 0 | 0 | 0 | 1 Ref      |
| MK327937 | Unassigned | Unassigned | Unassigned | 283_16  | Clustered/Singleton | 1 VC_283_16  | 1   | 0      | 1          | 0      | 0 | 0 | 0 | 1 Ref      |
| MK327939 | Unassigned | Unassigned | Unassigned | 283_119 | Clustered/Singleton | 1 VC_283_119 | 1   | 0      | 1          | 0      | 0 | 0 | 0 | 1 Ref      |
| MK327940 | Unassigned | Unassigned | Unassigned | 283_121 | Clustered           | 2 VC_283_121 | 2   | 0.0026 | 0.90700595 | 0.0023 | 0 | 0 | 0 | 1 Ref      |
| MK327941 | Unassigned | Unassigned | Unassigned | 590_0   | Clustered           | 27 VC_590_0  | 27  | 0.9947 | 1          | 0.9947 | 0 | 0 | 0 | 1 Ref      |
| MK327942 | Unassigned | Unassigned | Unassigned | 283_156 | Clustered/Singleton | 1 VC_283_156 | 1   | 0      | 1          | 0      | 0 | 0 | 0 | 1 Ref      |
| MK327943 | Unassigned | Unassigned | Unassigned | 286_1   | Clustered           | 21 VC_286_1  | 21  | 0.1696 | 1          | 0.1696 | 0 | 0 | 0 | 0.9048 Ref |
| MK327944 | Unassigned | Unassigned | Unassigned | 283_134 | Clustered/Singleton | 1 VC_283_134 | 1   | 0      | 1          | 0      | 0 | 0 | 0 | 1 Ref      |
| MK327945 | Unassigned | Unassigned | Unassigned | 283_121 | Clustered           | 2 VC_283_121 | 2   | 0.0026 | 0.90700595 | 0.0023 | 0 | 0 | 0 | 1 Ref      |
| MK327946 | Unassigned | Unassigned | Unassigned | 283_17  | Clustered/Singleton | 1 VC_283_17  | 1   | 0      | 1          | 0      | 0 | 0 | 0 | 1 Ref      |
| MK327947 | Unassigned | Unassigned | Unassigned | 590_0   | Clustered           | 27 VC_590_0  | 27  | 0.9947 | 1          | 0.9947 | 0 | 0 | 0 | 1 Ref      |
| MK330684 | Unassigned | Unassigned | Unassigned | 878_0   | Clustered           | 32 VC_878_0  | 32  | 0.9965 | 1          | 0.9965 | 0 | 0 | 0 | 1 Ref      |
| MK331930 | Unassigned | Unassigned | Unassigned | 149_8   | Clustered           | 66 VC_149_8  | 66  | 0.4565 | 1          | 0.4565 | 0 | 0 | 0 | 0.8182 Ref |
| MK331931 | Unassigned | Unassigned | Unassigned | 149_8   | Clustered           | 66 VC_149_8  | 66  | 0.4565 | 1          | 0.4565 | 0 | 0 | 0 | 0.8182 Ref |
| MK335533 | Unassigned | Unassigned | Unassigned | 575_0   | Clustered           | 35 VC_575_0  | 35  | 0.8815 | 1          | 0.8815 | 0 | 0 | 0 | 1 Ref      |
| MK340760 | Unassigned | Unassigned | Unassigned | 79_9    | Clustered           | 2 VC_79_9    | 2   | 0.0061 | 0.94860001 | 0.0058 | 0 | 0 | 0 | 1 Ref      |
| MK340761 | Unassigned | Unassigned | Unassigned | 76_0    | Clustered           | 37 VC_76_0   | 37  | 0.9403 | 1          | 0.9403 | 0 | 0 | 0 | 1 Ref      |
| MK340941 | Unassigned | Unassigned | Unassigned | 242_0   | Clustered           | 2 VC_242_0   | 2   | 0.0867 | 0.95379254 | 0.0827 | 0 | 0 | 0 | 1 Ref      |
| MK348510 | Unassigned | Unassigned | Unassigned | 8_0     | Clustered           | 58 VC_8_0    | 58  | 0.8306 | 1          | 0.8306 | 0 | 0 | 0 | 0.9946 Ref |
| MK359299 | Unassigned | Unassigned | Unassigned | 325_23  | Clustered           | 17 VC_325_23 | 17  | 0.0716 | 1          | 0.0716 | 0 | 0 | 0 | 0.6397 Ref |
| MK359300 | Unassigned | Unassigned | Unassigned | 325_53  | Clustered           | 7 VC_325_53  | 7   | 0.0242 | 1          | 0.0242 | 0 | 0 | 0 | 0.9048 Ref |
| MK359301 | Unassigned | Unassigned | Unassigned | 517_1   | Clustered           | 108 VC_517_1 | 108 | 0.8483 | 1          | 0.8483 | 0 | 0 | 0 | 0.9955 Ref |
| MK359302 | Unassigned | Unassigned | Unassigned | 868_0   | Clustered           | 25 VC_868_0  | 25  | 0.5791 | 1          | 0.5791 | 0 | 0 | 0 | 1 Ref      |
| MK359303 | Unassigned | Unassigned | Unassigned | 558_14  | Clustered           | 8 VC_558_14  | 8   | 0.0228 | 0.99945246 | 0.0228 | 0 | 0 | 0 | 0.8214 Ref |
| MK359304 | Unassigned | Unassigned | Unassigned | 325_53  | Clustered           | 7 VC_325_53  | 7   | 0.0242 | 1          | 0.0242 | 0 | 0 | 0 | 0.9048 Ref |
| MK359305 | Unassigned | Unassigned | Unassigned | 558_62  | Clustered/Singleton | 1 VC_558_62  | 1   | 0      | 1          | 0      | 0 | 0 | 0 | 1 Ref      |
| MK359306 | Unassigned | Unassigned | Unassigned | 558_53  | Clustered/Singleton | 1 VC_558_53  | 1   | 0      | 1          | 0      | 0 | 0 | 0 | 1 Ref      |
| MK359307 | Unassigned | Unassigned | Unassigned | 520_92  | Clustered           | 5 VC_520_92  | 5   | 0.0663 | 0.99999997 | 0.0663 | 0 | 0 | 0 | 1 Ref      |
| MK359308 | Unassigned | Unassigned | Unassigned | 558_77  | Clustered           | 3 VC_558_77  | 3   | 0.0065 | 0.90877939 | 0.0059 | 0 | 0 | 0 | 0.6667 Ref |
| MK359309 | Unassigned | Unassigned | Unassigned | 551_7   | Clustered           | 28 VC_551_7  | 28  | 0.1661 | 1          | 0.1661 | 0 | 0 | 0 | 0.8519 Ref |
| MK359310 | Unassigned | Unassigned | Unassigned | 517_0   | Clustered           | 18 VC_517_0  | 18  | 0.1599 | 1          | 0.1599 | 0 | 0 | 0 | 1 Ref      |
| MK359311 | Unassigned | Unassigned | Unassigned | 558_14  | Clustered           | 8 VC_558_14  | 8   | 0.0228 | 0.99945246 | 0.0228 | 0 | 0 | 0 | 0.8214 Ref |
| MK359312 | Unassigned | Unassigned | Unassigned | 325_35  | Clustered           | 17 VC_325_35 | 17  | 0.0732 | 1          | 0.0732 | 0 | 0 | 0 | 0.7721 Ref |
| MK359313 | Unassigned | Unassigned | Unassigned | 1175_0  | Clustered           | 22 VC_1175_0 | 22  | 0.4562 | 1          | 0.4562 | 0 | 0 | 0 | 1 Ref      |
| MK359314 | Unassigned | Unassigned | Unassigned | 558_50  | Clustered           | 15 VC_558_50 | 15  | 0.0468 | 1          | 0.0468 | 0 | 0 | 0 | 0.9238 Ref |
| MK359315 | Unassigned | Unassigned | Unassigned | 520_80  | Clustered           | 3 VC_520_80  | 3   | 0.0295 | 0.99859904 | 0.0295 | 0 | 0 | 0 | 1 Ref      |
| MK359316 | Unassigned | Unassigned | Unassigned | 325_33  | Clustered           | 4 VC_325_33  | 4   | 0.0149 | 0.99998565 | 0.0149 | 0 | 0 | 0 | 1 Ref      |
| MK359317 | Unassigned | Unassigned | Unassigned | 558_59  | Clustered/Singleton | 1 VC_558_59  | 1   | 0      | 1          | 0      | 0 | 0 | 0 | 1 Ref      |
| MK359318 | Unassigned | Unassigned | Unassigned | 558_61  | Clustered           | 2 VC_558_61  | 2   | 0.0032 | 0.66165479 | 0.0021 | 0 | 0 | 0 | 1 Ref      |
| MK359319 | Unassigned | Unassigned | Unassigned | 954_0   | Clustered           | 13 VC_954_0  | 13  | 0.863  | 1          | 0.863  | 0 | 0 | 0 | 1 Ref      |
| MK359320 | Unassigned | Unassigned | Unassigned | 551_0   | Clustered           | 16 VC_551_0  | 16  | 0.0915 | 1          | 0.0915 | 0 | 0 | 0 | 0.6667 Ref |
| MK359321 | Unassigned | Unassigned | Unassigned | 558_13  | Clustered/Singleton | 1 VC_558_13  | 1   | 0      | 1          | 0      | 0 | 0 | 0 | 1 Ref      |
| MK359322 | Unassigned | Unassigned | Unassigned | 517_0   | Clustered           | 18 VC_517_0  | 18  | 0.1599 | 1          | 0.1599 | 0 | 0 | 0 | 1 Ref      |
| MK359323 | Unassigned | Unassigned | Unassigned | 517_1   | Clustered           | 108 VC_517_1 | 108 | 0.8483 | 1          | 0.8483 | 0 | 0 | 0 | 0.9955 Ref |
| MK359324 | Unassigned | Unassigned | Unassigned | 558_9   | Clustered           | 3 VC_558_9   | 3   | 0.0064 | 0.82911529 | 0.0053 | 0 | 0 | 0 | 0.6667 Ref |
| MK359325 | Unassigned | Unassigned | Unassigned | 517_1   | Clustered           | 108 VC_517_1 | 108 | 0.8483 | 1          | 0.8483 | 0 | 0 | 0 | 0.9955 Ref |
| MK359326 | Unassigned | Unassigned | Unassigned | 558_20  | Clustered           | 17 VC_558_20 | 17  | 0.054  | 1          | 0.054  | 0 | 0 | 0 | 0.9926 Ref |
| MK359327 | Unassigned | Unassigned | Unassigned | 558_45  | Clustered/Singleton | 1 VC_558_45  | 1   | 0      | 1          | 0      | 0 | 0 | 0 | 1 Ref      |
| MK359328 | Unassigned | Unassigned | Unassigned | 558_17  | Clustered/Singleton | 1 VC_558_17  | 1   | 0      | 1          | 0      | 0 | 0 | 0 | 1 Ref      |
| MK359329 | Unassigned | Unassigned | Unassigned | 558_69  | Clustered/Singleton | 1 VC_558_69  | 1   | 0      | 1          | 0      | 0 | 0 | 0 | 1 Ref      |
| MK359330 | Unassigned | Unassigned | Unassigned | 558_66  | Clustered/Singleton | 1 VC_558_66  | 1   | 0      | 1          | 0      | 0 | 0 | 0 | 1 Ref      |
| MK359331 | Unassigned | Unassigned | Unassigned | 325_10  | Clustered           | 3 VC_325_10  | 3   | 0.012  | 0.99859169 | 0.012  | 0 | 0 | 0 | 1 Ref      |
| MK359332 | Unassigned | Unassigned | Unassigned | 1071_0  | Clustered           | 20 VC_1071_0 | 20  | 0.3268 | 1          | 0.3268 | 0 | 0 | 0 | 0.9842 Ref |
| MK359333 | Unassigned | Unassigned | Unassigned | 558_28  | Clustered/Singleton | 1 VC_558_28  | 1   | 0      | 1          | 0      | 0 | 0 | 0 | 1 Ref      |
| MK359334 | Unassigned | Unassigned | Unassigned | 558_49  | Clustered           | 7 VC_558_49  | 7   | 0.0194 | 0.99510369 | 0.0193 | 0 | 0 | 0 | 0.8571 Ref |
| MK359335 | Unassigned | Unassigned | Unassigned | 558_20  | Clustered           | 17 VC_558_20 | 17  | 0.054  | 1          | 0.054  | 0 | 0 | 0 | 0.9926 Ref |
| MK359336 | Unassigned | Unassigned | Unassigned | 558_36  | Clustered           | 4 VC_558_36  | 4   | 0.0096 | 0.85913852 | 0.0082 | 0 | 0 | 0 | 1 Ref      |
| MK359337 | Unassigned | Unassigned | Unassigned | 558_43  | Clustered/Singleton | 1 VC_558_43  | 1   | 0      | 1          | 0      | 0 | 0 | 0 | 1 Ref      |
| MK359338 | Unassigned | Unassigned | Unassigned | 558_20  | Clustered           | 17 VC_558_20 | 17  | 0.054  | 1          | 0.054  | 0 | 0 | 0 | 0.9926 Ref |
| MK359339 | Unassigned | Unassigned | Unassigned | 558_20  | Clustered           | 17 VC_558_20 | 17  | 0.054  | 1          | 0.054  | 0 | 0 | 0 | 0.9926 Ref |
| MK359340 | Unassigned | Unassigned | Unassigned | 517_1   | Clustered           | 108 VC_517_1 | 108 | 0.8483 | 1          | 0.8483 | 0 | 0 | 0 | 0.9955 Ref |
| MK359341 | Unassigned | Unassigned | Unassigned | 514_0   | Clustered           | 75 VC_514_0  | 75  | 0.9402 | 1          | 0.9402 | 0 | 0 | 0 | 1 Ref      |
| MK359342 | Unassigned | Unassigned | Unassigned | 558_15  | Clustered/Singleton | 1 VC_558_15  | 1   | 0      | 1          | 0      | 0 | 0 | 0 | 1 Ref      |
| MK359343 | Unassigned | Unassigned | Unassigned | 520_57  | Clustered/Singleton | 1 VC_520_57  | 1   | 0      | 1          | 0      | 0 | 0 | 0 | 1 Ref      |
| MK359344 | Unassigned | Unassigned | Unassigned | 558_30  | Clustered           | 3 VC_558_30  | 3   | 0.0064 | 0.76574053 | 0.0049 | 0 | 0 | 0 | 1 Ref      |
| MK359345 | Unassigned | Unassigned | Unassigned | 558_44  | Clustered/Singleton | 1 VC_558_44  | 1   | 0      | 1          | 0      | 0 | 0 | 0 | 1 Ref      |
| MK359346 | Unassigned | Unassigned | Unassigned | 558_71  | Clustered/Singleton | 1 VC_558_71  | 1   | 0      | 1          | 0      | 0 | 0 | 0 | 1 Ref      |
| MK359347 | Unassigned | Unassigned | Unassigned | 558_20  | Clustered           | 17 VC_558_20 | 17  | 0.054  | 1          | 0.054  | 0 | 0 | 0 | 0.9926 Ref |
| MK359348 | Unassigned | Unassigned | Unassigned | 558_12  | Clustered           | 3 VC_558_12  | 3   | 0.0064 | 0.87854253 | 0.0057 | 0 | 0 | 0 | 1 Ref      |
| MK359349 | Unassigned | Unassigned | Unassigned | 558_46  | Clustered/Singleton | 1 VC_558_46  | 1   | 0      | 1          | 0      | 0 | 0 | 0 | 1 Ref      |
| MK359350 | Unassigned | Unassigned | Unassigned | 558_64  | Clustered/Singleton | 1 VC_558_64  | 1   | 0      | 1          | 0      | 0 | 0 | 0 | 1 Ref      |
| MK359351 | Unassigned | Unassigned | Unassigned | 1071_0  | Clustered           | 20 VC_1071_0 | 20  | 0.3268 | 1          | 0.3268 | 0 | 0 | 0 | 0.9842 Ref |
| MK359352 | Unassigned | Unassigned | Unassigned | 223_0   | Clustered           | 38 VC_223_0  | 38  | 0.9095 | 1          | 0.9095 | 0 | 0 | 0 | 1 Ref      |
| MK359353 | Unassigned | Unassigned | Unassigned | 558_4   | Clustered/Singleton | 1 VC_558_4   | 1   | 0      | 1          | 0      | 0 | 0 | 0 | 1 Ref      |
| MK359354 | Unassigned | Unassigned | Unassigned | 325_5   | Clustered           | 11 VC_325_5  | 11  | 0.047  | 1          | 0.047  | 0 | 0 | 0 | 0.7636 Ref |
| MK359355 | Unassigned | Unassigned | Unassigned | 558_3   | Clustered/Singleton | 1 VC_558_3   | 1   | 0      | 1          | 0      | 0 | 0 | 0 | 1 Ref      |
| MK359356 | Unassigned | Unassigned | Unassigned | 517_1   | Clustered           | 108 VC_517_1 | 108 | 0.8483 | 1          | 0.8483 | 0 | 0 | 0 | 0.9955 Ref |
| MK359357 | Unassigned | Unassigned | Unassigned | 509_0   | Clustered           | 37 VC_509_0  | 37  | 0.9689 | 1          | 0.9689 | 0 | 0 | 0 | 1 Ref      |
| MK359358 | Unassigned | Unassigned | Unassigned | 558_14  | Clustered           | 8 VC_558_14  | 8   | 0.0228 | 0.99945246 | 0.0228 | 0 | 0 | 0 | 0.8214 Ref |
| MK359359 | Unassigned | Unassigned | Unassigned | 558_73  | Clustered           | 2 VC_558_73  | 2   | 0.0033 | 0.84374839 | 0.0028 | 0 | 0 | 0 | 1 Ref      |
| MK359360 | Unassigned | Unassigned | Unassigned | 223_0   | Clustered           | 38 VC_223_0  | 38  | 0.9095 | 1          | 0.9095 | 0 | 0 | 0 | 1 Ref      |



|          |            |            |            |         |                     |              |     |        |            |        |   |   |   |            |
|----------|------------|------------|------------|---------|---------------------|--------------|-----|--------|------------|--------|---|---|---|------------|
| MK359361 | Unassigned | Unassigned | Unassigned | 558_27  | Clustered           | 2 VC_558_27  | 2   | 0.0032 | 0.64135461 | 0.002  | 0 | 0 | 0 | 1 Ref      |
| MK359362 | Unassigned | Unassigned | Unassigned | 558_20  | Clustered           | 17 VC_558_20 | 17  | 0.054  | 1          | 0.054  | 0 | 0 | 0 | 0.9926 Ref |
| MK359363 | Unassigned | Unassigned | Unassigned | 558_36  | Clustered           | 4 VC_558_36  | 4   | 0.0096 | 0.85913852 | 0.0082 | 0 | 0 | 0 | 1 Ref      |
| MK359364 | Unassigned | Unassigned | Unassigned | 558_39  | Clustered           | 3 VC_558_39  | 3   | 0.0063 | 0.73849574 | 0.0047 | 0 | 0 | 0 | 0.6667 Ref |
| MK359365 | Unassigned | Unassigned | Unassigned | 558_50  | Clustered           | 15 VC_558_50 | 15  | 0.0468 | 1          | 0.0468 | 0 | 0 | 0 | 0.9238 Ref |
| MK359366 | Unassigned | Unassigned | Unassigned | 558_36  | Clustered           | 4 VC_558_36  | 4   | 0.0096 | 0.85913852 | 0.0082 | 0 | 0 | 0 | 1 Ref      |
| MK359990 | Unassigned | Unassigned | Unassigned | 632_0   | Clustered           | 37 VC_632_0  | 37  | 0.581  | 1          | 0.581  | 0 | 0 | 0 | 0.9234 Ref |
| MK360024 | Unassigned | Unassigned | Unassigned | 695_0   | Clustered           | 48 VC_695_0  | 48  | 0.8162 | 1          | 0.8162 | 0 | 0 | 0 | 1 Ref      |
| MK360025 | Unassigned | Unassigned | Unassigned | 968_0   | Clustered           | 4 VC_968_0   | 4   | 0.2959 | 0.99997642 | 0.2959 | 0 | 0 | 0 | 1 Ref      |
| MK370036 | Unassigned | Unassigned | Unassigned | 191_1   | Clustered/Singleton | 1 VC_191_1   | 1   | 0      | 1          | 0      | 0 | 0 | 0 | 1 Ref      |
| MK372342 | Unassigned | Unassigned | Unassigned | 456_0   | Clustered           | 62 VC_456_0  | 62  | 0.9026 | 1          | 0.9026 | 0 | 0 | 0 | 1 Ref      |
| MK373770 | Unassigned | Unassigned | Unassigned | 813_1   | Clustered           | 24 VC_813_1  | 24  | 0.535  | 1          | 0.535  | 0 | 0 | 0 | 1 Ref      |
| MK373771 | Unassigned | Unassigned | Unassigned | 452_0   | Clustered           | 66 VC_452_0  | 66  | 0.9248 | 1          | 0.9248 | 0 | 0 | 0 | 1 Ref      |
| MK373772 | Unassigned | Unassigned | Unassigned | 1228_0  | Clustered           | 2 VC_1228_0  | 2   | 0.9902 | 0.72985431 | 0.7227 | 0 | 0 | 0 | 1 Ref      |
| MK373773 | Unassigned | Unassigned | Unassigned | 452_0   | Clustered           | 66 VC_452_0  | 66  | 0.9248 | 1          | 0.9248 | 0 | 0 | 0 | 1 Ref      |
| MK373774 | Unassigned | Unassigned | Unassigned | 286_3   | Clustered           | 2 VC_286_3   | 2   | 0.0073 | 0.74885804 | 0.0055 | 0 | 0 | 0 | 1 Ref      |
| MK373775 | Unassigned | Unassigned | Unassigned | 286_3   | Clustered           | 2 VC_286_3   | 2   | 0.0073 | 0.74885804 | 0.0055 | 0 | 0 | 0 | 1 Ref      |
| MK373776 | Unassigned | Unassigned | Unassigned | 618_0   | Clustered           | 13 VC_618_0  | 13  | 0.6252 | 1          | 0.6252 | 0 | 0 | 0 | 1 Ref      |
| MK373777 | Unassigned | Unassigned | Unassigned | 618_0   | Clustered           | 13 VC_618_0  | 13  | 0.6252 | 1          | 0.6252 | 0 | 0 | 0 | 1 Ref      |
| MK373778 | Unassigned | Unassigned | Unassigned | 286_1   | Clustered           | 21 VC_286_1  | 21  | 0.1696 | 1          | 0.1696 | 0 | 0 | 0 | 0.9048 Ref |
| MK373779 | Unassigned | Unassigned | Unassigned | 283_124 | Clustered/Singleton | 1 VC_283_124 | 1   | 0      | 1          | 0      | 0 | 0 | 0 | 1 Ref      |
| MK373780 | Unassigned | Unassigned | Unassigned | 772_19  | Clustered           | 16 VC_772_19 | 16  | 0.0975 | 0.9970466  | 0.0972 | 0 | 0 | 0 | 0.8083 Ref |
| MK373781 | Unassigned | Unassigned | Unassigned | 283_53  | Clustered/Singleton | 1 VC_283_53  | 1   | 0      | 1          | 0      | 0 | 0 | 0 | 1 Ref      |
| MK373782 | Unassigned | Unassigned | Unassigned | 286_1   | Clustered           | 21 VC_286_1  | 21  | 0.1696 | 1          | 0.1696 | 0 | 0 | 0 | 0.9048 Ref |
| MK373783 | Unassigned | Unassigned | Unassigned | 132_1   | Clustered           | 17 VC_132_1  | 17  | 0.1738 | 1          | 0.1738 | 0 | 0 | 0 | 0.9853 Ref |
| MK373784 | Unassigned | Unassigned | Unassigned | 286_1   | Clustered           | 21 VC_286_1  | 21  | 0.1696 | 1          | 0.1696 | 0 | 0 | 0 | 0.9048 Ref |
| MK373785 | Unassigned | Unassigned | Unassigned | 283_12  | Clustered/Singleton | 1 VC_283_12  | 1   | 0      | 1          | 0      | 0 | 0 | 0 | 1 Ref      |
| MK373786 | Unassigned | Unassigned | Unassigned | 283_43  | Clustered/Singleton | 1 VC_283_43  | 1   | 0      | 1          | 0      | 0 | 0 | 0 | 1 Ref      |
| MK373787 | Unassigned | Unassigned | Unassigned | 283_76  | Clustered/Singleton | 1 VC_283_76  | 1   | 0      | 1          | 0      | 0 | 0 | 0 | 1 Ref      |
| MK373788 | Unassigned | Unassigned | Unassigned | 847_1   | Clustered           | 26 VC_847_1  | 26  | 0.6323 | 1          | 0.6323 | 0 | 0 | 0 | 0.9815 Ref |
| MK373789 | Unassigned | Unassigned | Unassigned | 835_0   | Clustered           | 67 VC_835_0  | 67  | 0.9624 | 1          | 0.9624 | 0 | 0 | 0 | 1 Ref      |
| MK373790 | Unassigned | Unassigned | Unassigned | 835_0   | Clustered           | 67 VC_835_0  | 67  | 0.9624 | 1          | 0.9624 | 0 | 0 | 0 | 1 Ref      |
| MK373791 | Unassigned | Unassigned | Unassigned | 835_0   | Clustered           | 67 VC_835_0  | 67  | 0.9624 | 1          | 0.9624 | 0 | 0 | 0 | 1 Ref      |
| MK373792 | Unassigned | Unassigned | Unassigned | 190_1   | Clustered/Singleton | 1 VC_190_1   | 1   | 0      | 1          | 0      | 0 | 0 | 0 | 1 Ref      |
| MK373793 | Unassigned | Unassigned | Unassigned | 456_0   | Clustered           | 62 VC_456_0  | 62  | 0.9026 | 1          | 0.9026 | 0 | 0 | 0 | 1 Ref      |
| MK373794 | Unassigned | Unassigned | Unassigned | 722_0   | Clustered           | 13 VC_722_0  | 13  | 0.5104 | 1          | 0.5104 | 0 | 0 | 0 | 1 Ref      |
| MK373795 | Unassigned | Unassigned | Unassigned | 722_0   | Clustered           | 13 VC_722_0  | 13  | 0.5104 | 1          | 0.5104 | 0 | 0 | 0 | 1 Ref      |
| MK373796 | Unassigned | Unassigned | Unassigned | 190_9   | Clustered/Singleton | 1 VC_190_9   | 1   | 0      | 1          | 0      | 0 | 0 | 0 | 1 Ref      |
| MK373797 | Unassigned | Unassigned | Unassigned | 190_2   | Clustered           | 2 VC_190_2   | 2   | 0.0073 | 0.95531062 | 0.007  | 0 | 0 | 0 | 1 Ref      |
| MK373798 | Unassigned | Unassigned | Unassigned | 941_0   | Clustered           | 40 VC_941_0  | 40  | 0.6903 | 1          | 0.6903 | 0 | 0 | 0 | 1 Ref      |
| MK373799 | Unassigned | Unassigned | Unassigned | 190_2   | Clustered           | 2 VC_190_2   | 2   | 0.0073 | 0.95531062 | 0.007  | 0 | 0 | 0 | 1 Ref      |
| MK376953 | Unassigned | Unassigned | Unassigned | 799_1   | Clustered           | 27 VC_799_1  | 27  | 0.8611 | 1          | 0.8611 | 0 | 0 | 0 | 1 Ref      |
| MK376954 | Unassigned | Unassigned | Unassigned | 767_0   | Clustered           | 34 VC_767_0  | 34  | 0.9173 | 1          | 0.9173 | 0 | 0 | 0 | 1 Ref      |
| MK376955 | Unassigned | Unassigned | Unassigned | 237_3   | Clustered           | 8 VC_237_3   | 8   | 0.1092 | 1          | 0.1092 | 0 | 0 | 0 | 1 Ref      |
| MK376956 | Unassigned | Unassigned | Unassigned | 1181_1  | Clustered           | 10 VC_1181_1 | 10  | 0.5828 | 1          | 0.5828 | 0 | 0 | 0 | 1 Ref      |
| MK376957 | Unassigned | Unassigned | Unassigned | 799_1   | Clustered           | 27 VC_799_1  | 27  | 0.8611 | 1          | 0.8611 | 0 | 0 | 0 | 1 Ref      |
| MK376958 | Unassigned | Unassigned | Unassigned | 954_0   | Clustered           | 13 VC_954_0  | 13  | 0.863  | 1          | 0.863  | 0 | 0 | 0 | 1 Ref      |
| MK376959 | Unassigned | Unassigned | Unassigned | 1181_1  | Clustered           | 10 VC_1181_1 | 10  | 0.5828 | 1          | 0.5828 | 0 | 0 | 0 | 1 Ref      |
| MK376960 | Unassigned | Unassigned | Unassigned | 767_0   | Clustered           | 34 VC_767_0  | 34  | 0.9173 | 1          | 0.9173 | 0 | 0 | 0 | 1 Ref      |
| MK376961 | Unassigned | Unassigned | Unassigned | 557_1   | Clustered           | 11 VC_557_1  | 11  | 0.4945 | 1          | 0.4945 | 0 | 0 | 0 | 0.7818 Ref |
| MK376962 | Unassigned | Unassigned | Unassigned | 767_0   | Clustered           | 34 VC_767_0  | 34  | 0.9173 | 1          | 0.9173 | 0 | 0 | 0 | 1 Ref      |
| MK376963 | Unassigned | Unassigned | Unassigned | 856_1   | Clustered           | 13 VC_856_1  | 13  | 0.5848 | 1          | 0.5848 | 0 | 0 | 0 | 1 Ref      |
| MK380014 | Unassigned | Unassigned | Unassigned | 452_0   | Clustered           | 66 VC_452_0  | 66  | 0.9248 | 1          | 0.9248 | 0 | 0 | 0 | 1 Ref      |
| MK380015 | Unassigned | Unassigned | Unassigned | 823_0   | Clustered           | 124 VC_823_0 | 124 | 0.9492 | 1          | 0.9492 | 0 | 0 | 0 | 1 Ref      |
| MK380016 | Unassigned | Unassigned | Unassigned | 823_0   | Clustered           | 124 VC_823_0 | 124 | 0.9492 | 1          | 0.9492 | 0 | 0 | 0 | 1 Ref      |
| MK387309 | Unassigned | Unassigned | Unassigned | 644_0   | Clustered           | 5 VC_644_0   | 5   | 0.6649 | 0.99999975 | 0.6649 | 0 | 0 | 0 | 1 Ref      |
| MK387337 | Unassigned | Unassigned | Unassigned | 845_0   | Clustered           | 3 VC_845_0   | 3   | 0.3348 | 0.99831497 | 0.3343 | 0 | 0 | 0 | 1 Ref      |
| MK387869 | Unassigned | Unassigned | Unassigned | 112_0   | Clustered           | 8 VC_112_0   | 8   | 0.2537 | 1          | 0.2537 | 0 | 0 | 0 | 1 Ref      |
| MK388689 | Unassigned | Unassigned | Unassigned | 846_0   | Clustered           | 2 VC_846_0   | 2   | 0.5455 | 0.92357512 | 0.5038 | 0 | 0 | 0 | 1 Ref      |
| MK388859 | Unassigned | Unassigned | Unassigned | 181_0   | Clustered           | 5 VC_181_0   | 5   | 0.1168 | 0.99999995 | 0.1168 | 0 | 0 | 0 | 1 Ref      |
| MK392363 | Unassigned | Unassigned | Unassigned | 981_1   | Clustered           | 26 VC_981_1  | 26  | 0.7009 | 1          | 0.7009 | 0 | 0 | 0 | 1 Ref      |
| MK392364 | Unassigned | Unassigned | Unassigned | 981_1   | Clustered           | 26 VC_981_1  | 26  | 0.7009 | 1          | 0.7009 | 0 | 0 | 0 | 1 Ref      |
| MK392365 | Unassigned | Unassigned | Unassigned | 981_1   | Clustered           | 26 VC_981_1  | 26  | 0.7009 | 1          | 0.7009 | 0 | 0 | 0 | 1 Ref      |
| MK392366 | Unassigned | Unassigned | Unassigned | 981_1   | Clustered           | 26 VC_981_1  | 26  | 0.7009 | 1          | 0.7009 | 0 | 0 | 0 | 1 Ref      |
| MK392367 | Unassigned | Unassigned | Unassigned | 521_0   | Clustered           | 37 VC_521_0  | 37  | 0.912  | 1          | 0.912  | 0 | 0 | 0 | 1 Ref      |
| MK392368 | Unassigned | Unassigned | Unassigned | 1037_0  | Clustered           | 6 VC_1037_0  | 6   | 0.6798 | 1          | 0.6798 | 0 | 0 | 0 | 1 Ref      |
| MK393882 | Unassigned | Unassigned | Unassigned | 191_16  | Clustered           | 12 VC_191_16 | 12  | 0.0643 | 1          | 0.0643 | 0 | 0 | 0 | 0.9394 Ref |
| MK408758 | Unassigned | Unassigned | Unassigned | 843_0   | Clustered           | 5 VC_843_0   | 5   | 0.2843 | 0.99999994 | 0.2843 | 0 | 0 | 0 | 1 Ref      |
| MK411746 | Unassigned | Unassigned | Unassigned | 1370_0  | Clustered           | 2 VC_1370_0  | 2   | 0.8214 | 0.91237788 | 0.7494 | 0 | 0 | 0 | 1 Ref      |
| MK416007 | Unassigned | Unassigned | Unassigned | 242_1   | Clustered           | 20 VC_242_1  | 20  | 0.684  | 1          | 0.684  | 0 | 0 | 0 | 0.8368 Ref |
| MK416008 | Unassigned | Unassigned | Unassigned | 35_0    | Clustered           | 6 VC_35_0    | 6   | 0.2254 | 1          | 0.2254 | 0 | 0 | 0 | 0.9333 Ref |
| MK416009 | Unassigned | Unassigned | Unassigned | 6_0     | Clustered           | 44 VC_6_0    | 44  | 0.908  | 1          | 0.908  | 0 | 0 | 0 | 1 Ref      |
| MK416010 | Unassigned | Unassigned | Unassigned | 476_0   | Clustered           | 19 VC_476_0  | 19  | 0.7814 | 1          | 0.7814 | 0 | 0 | 0 | 1 Ref      |
| MK416011 | Unassigned | Unassigned | Unassigned | 6_0     | Clustered           | 44 VC_6_0    | 44  | 0.908  | 1          | 0.908  | 0 | 0 | 0 | 1 Ref      |
| MK416012 | Unassigned | Unassigned | Unassigned | 6_0     | Clustered           | 44 VC_6_0    | 44  | 0.908  | 1          | 0.908  | 0 | 0 | 0 | 1 Ref      |
| MK416013 | Unassigned | Unassigned | Unassigned | 35_0    | Clustered           | 6 VC_35_0    | 6   | 0.2254 | 1          | 0.2254 | 0 | 0 | 0 | 0.9333 Ref |
| MK416014 | Unassigned | Unassigned | Unassigned | 243_0   | Clustered           | 2 VC_243_0   | 2   | 0.0637 | 0.95609892 | 0.0609 | 0 | 0 | 0 | 1 Ref      |
| MK416015 | Unassigned | Unassigned | Unassigned | 229_0   | Clustered           | 32 VC_229_0  | 32  | 0.9119 | 1          | 0.9119 | 0 | 0 | 0 | 1 Ref      |
| MK416017 | Unassigned | Unassigned | Unassigned | 244_0   | Clustered           | 12 VC_244_0  | 12  | 0.4039 | 1          | 0.4039 | 0 | 0 | 0 | 1 Ref      |
| MK416018 | Unassigned | Unassigned | Unassigned | 228_0   | Clustered           | 60 VC_228_0  | 60  | 0.942  | 1          | 0.942  | 0 | 0 | 0 | 1 Ref      |
| MK416019 | Unassigned | Unassigned | Unassigned | 242_1   | Clustered           | 20 VC_242_1  | 20  | 0.684  | 1          | 0.684  | 0 | 0 | 0 | 0.8368 Ref |



|          |            |            |            |       |                     |             |    |        |            |        |   |   |   |            |
|----------|------------|------------|------------|-------|---------------------|-------------|----|--------|------------|--------|---|---|---|------------|
| MK416020 | Unassigned | Unassigned | Unassigned | 6_0   | Clustered           | 44 VC_6_0   | 44 | 0.908  | 1          | 0.908  | 0 | 0 | 0 | 1 Ref      |
| MK416022 | Unassigned | Unassigned | Unassigned | 35_0  | Clustered           | 6 VC_35_0   | 6  | 0.2254 | 1          | 0.2254 | 0 | 0 | 0 | 0.9333 Ref |
| MK417514 | Unassigned | Unassigned | Unassigned | 149_8 | Clustered           | 66 VC_149_8 | 66 | 0.4565 | 1          | 0.4565 | 0 | 0 | 0 | 0.8182 Ref |
| MK417515 | Unassigned | Unassigned | Unassigned | 149_8 | Clustered           | 66 VC_149_8 | 66 | 0.4565 | 1          | 0.4565 | 0 | 0 | 0 | 0.8182 Ref |
| MK417516 | Unassigned | Unassigned | Unassigned | 149_8 | Clustered           | 66 VC_149_8 | 66 | 0.4565 | 1          | 0.4565 | 0 | 0 | 0 | 0.8182 Ref |
| MK421971 | Unassigned | Unassigned | Unassigned | 491_0 | Clustered           | 36 VC_491_0 | 36 | 0.5336 | 1          | 0.5336 | 0 | 0 | 0 | 0.9714 Ref |
| MK422448 | Unassigned | Unassigned | Unassigned | 476_0 | Clustered           | 19 VC_476_0 | 19 | 0.7814 | 1          | 0.7814 | 0 | 0 | 0 | 1 Ref      |
| MK422449 | Unassigned | Unassigned | Unassigned | 6_0   | Clustered           | 44 VC_6_0   | 44 | 0.908  | 1          | 0.908  | 0 | 0 | 0 | 1 Ref      |
| MK422451 | Unassigned | Unassigned | Unassigned | 723_0 | Clustered           | 9 VC_723_0  | 9  | 0.7138 | 1          | 0.7138 | 0 | 0 | 0 | 1 Ref      |
| MK422453 | Unassigned | Unassigned | Unassigned | 6_0   | Clustered           | 44 VC_6_0   | 44 | 0.908  | 1          | 0.908  | 0 | 0 | 0 | 1 Ref      |
| MK422454 | Unassigned | Unassigned | Unassigned | 6_0   | Clustered           | 44 VC_6_0   | 44 | 0.908  | 1          | 0.908  | 0 | 0 | 0 | 1 Ref      |
| MK422455 | Unassigned | Unassigned | Unassigned | 242_1 | Clustered           | 20 VC_242_1 | 20 | 0.684  | 1          | 0.684  | 0 | 0 | 0 | 0.8368 Ref |
| MK424903 | Unassigned | Unassigned | Unassigned | 277_0 | Clustered           | 3 VC_277_0  | 3  | 1      | 1          | 1      | 0 | 0 | 0 | 1 Ref      |
| MK433259 | Unassigned | Unassigned | Unassigned | 872_0 | Clustered           | 31 VC_872_0 | 31 | 0.8151 | 1          | 0.8151 | 0 | 0 | 0 | 0.8194 Ref |
| MK433260 | Unassigned | Unassigned | Unassigned | 872_0 | Clustered           | 31 VC_872_0 | 31 | 0.8151 | 1          | 0.8151 | 0 | 0 | 0 | 0.8194 Ref |
| MK433261 | Unassigned | Unassigned | Unassigned | 868_0 | Clustered           | 25 VC_868_0 | 25 | 0.5791 | 1          | 0.5791 | 0 | 0 | 0 | 1 Ref      |
| MK433262 | Unassigned | Unassigned | Unassigned | 551_8 | Clustered           | 19 VC_551_8 | 19 | 0.1039 | 1          | 0.1039 | 0 | 0 | 0 | 0.8713 Ref |
| MK433263 | Unassigned | Unassigned | Unassigned | 868_0 | Clustered           | 25 VC_868_0 | 25 | 0.5791 | 1          | 0.5791 | 0 | 0 | 0 | 1 Ref      |
| MK433265 | Unassigned | Unassigned | Unassigned | 868_0 | Clustered           | 25 VC_868_0 | 25 | 0.5791 | 1          | 0.5791 | 0 | 0 | 0 | 1 Ref      |
| MK433266 | Unassigned | Unassigned | Unassigned | 373_0 | Clustered           | 10 VC_373_0 | 10 | 0.7471 | 1          | 0.7471 | 0 | 0 | 0 | 1 Ref      |
| MK433267 | Unassigned | Unassigned | Unassigned | 868_0 | Clustered           | 25 VC_868_0 | 25 | 0.5791 | 1          | 0.5791 | 0 | 0 | 0 | 1 Ref      |
| MK433268 | Unassigned | Unassigned | Unassigned | 872_0 | Clustered           | 31 VC_872_0 | 31 | 0.8151 | 1          | 0.8151 | 0 | 0 | 0 | 0.8194 Ref |
| MK433269 | Unassigned | Unassigned | Unassigned | 872_0 | Clustered           | 31 VC_872_0 | 31 | 0.8151 | 1          | 0.8151 | 0 | 0 | 0 | 0.8194 Ref |
| MK433270 | Unassigned | Unassigned | Unassigned | 982_0 | Clustered           | 62 VC_982_0 | 62 | 0.8646 | 1          | 0.8646 | 0 | 0 | 0 | 0.743 Ref  |
| MK433271 | Unassigned | Unassigned | Unassigned | 982_0 | Clustered           | 62 VC_982_0 | 62 | 0.8646 | 1          | 0.8646 | 0 | 0 | 0 | 0.743 Ref  |
| MK433272 | Unassigned | Unassigned | Unassigned | 767_0 | Clustered           | 34 VC_767_0 | 34 | 0.9173 | 1          | 0.9173 | 0 | 0 | 0 | 1 Ref      |
| MK433273 | Unassigned | Unassigned | Unassigned | 514_0 | Clustered           | 75 VC_514_0 | 75 | 0.9402 | 1          | 0.9402 | 0 | 0 | 0 | 1 Ref      |
| MK433274 | Unassigned | Unassigned | Unassigned | 685_0 | Clustered           | 16 VC_685_0 | 16 | 0.2972 | 1          | 0.2972 | 0 | 0 | 0 | 0.9167 Ref |
| MK433275 | Unassigned | Unassigned | Unassigned | 685_0 | Clustered           | 16 VC_685_0 | 16 | 0.2972 | 1          | 0.2972 | 0 | 0 | 0 | 0.9167 Ref |
| MK433276 | Unassigned | Unassigned | Unassigned | 982_0 | Clustered           | 62 VC_982_0 | 62 | 0.8646 | 1          | 0.8646 | 0 | 0 | 0 | 0.743 Ref  |
| MK433277 | Unassigned | Unassigned | Unassigned | 761_0 | Clustered           | 67 VC_761_0 | 67 | 0.8947 | 1          | 0.8947 | 0 | 0 | 0 | 1 Ref      |
| MK433278 | Unassigned | Unassigned | Unassigned | 982_0 | Clustered           | 62 VC_982_0 | 62 | 0.8646 | 1          | 0.8646 | 0 | 0 | 0 | 0.743 Ref  |
| MK433279 | Unassigned | Unassigned | Unassigned | 761_0 | Clustered           | 67 VC_761_0 | 67 | 0.8947 | 1          | 0.8947 | 0 | 0 | 0 | 1 Ref      |
| MK433577 | Unassigned | Unassigned | Unassigned | 6_0   | Clustered           | 44 VC_6_0   | 44 | 0.908  | 1          | 0.908  | 0 | 0 | 0 | 1 Ref      |
| MK433578 | Unassigned | Unassigned | Unassigned | 6_0   | Clustered           | 44 VC_6_0   | 44 | 0.908  | 1          | 0.908  | 0 | 0 | 0 | 1 Ref      |
| MK433579 | Unassigned | Unassigned | Unassigned | 242_1 | Clustered           | 20 VC_242_1 | 20 | 0.684  | 1          | 0.684  | 0 | 0 | 0 | 0.8368 Ref |
| MK433580 | Unassigned | Unassigned | Unassigned | 6_0   | Clustered           | 44 VC_6_0   | 44 | 0.908  | 1          | 0.908  | 0 | 0 | 0 | 1 Ref      |
| MK433581 | Unassigned | Unassigned | Unassigned | 6_0   | Clustered           | 44 VC_6_0   | 44 | 0.908  | 1          | 0.908  | 0 | 0 | 0 | 1 Ref      |
| MK433582 | Unassigned | Unassigned | Unassigned | 6_0   | Clustered           | 44 VC_6_0   | 44 | 0.908  | 1          | 0.908  | 0 | 0 | 0 | 1 Ref      |
| MK443264 | Unassigned | Unassigned | Unassigned | 6_0   | Clustered           | 37 VC_6_0   | 37 | 0.9403 | 1          | 0.9403 | 0 | 0 | 0 | 1 Ref      |
| MK443265 | Unassigned | Unassigned | Unassigned | 76_0  | Clustered           | 1 VC_76_0   | 1  | 0      | 0          | 0      | 0 | 0 | 0 | 1 Ref      |
| MK443266 | Unassigned | Unassigned | Unassigned | 76_1  | Clustered/Singleton | 1 VC_76_1   | 1  | 0      | 0          | 0      | 0 | 0 | 0 | 1 Ref      |
| MK448230 | Unassigned | Unassigned | Unassigned | 167_0 | Clustered           | 3 VC_167_0  | 3  | 0.6952 | 0.99826575 | 0.694  | 0 | 0 | 0 | 0.8368 Ref |
| MK448231 | Unassigned | Unassigned | Unassigned | 242_1 | Clustered           | 20 VC_242_1 | 20 | 0.684  | 1          | 0.684  | 0 | 0 | 0 | 0.6944 Ref |
| MK448233 | Unassigned | Unassigned | Unassigned | 31_0  | Clustered           | 9 VC_31_0   | 9  | 0.3435 | 1          | 0.3435 | 0 | 0 | 0 | 0.6944 Ref |
| MK448234 | Unassigned | Unassigned | Unassigned | 31_0  | Clustered           | 9 VC_31_0   | 9  | 0.3435 | 1          | 0.3435 | 0 | 0 | 0 | 0.9353 Ref |
| MK448235 | Unassigned | Unassigned | Unassigned | 35_0  | Clustered           | 6 VC_35_0   | 6  | 0.2254 | 1          | 0.2254 | 0 | 0 | 0 | 0.6944 Ref |
| MK448237 | Unassigned | Unassigned | Unassigned | 31_0  | Clustered           | 9 VC_31_0   | 9  | 0.3435 | 1          | 0.3435 | 0 | 0 | 0 | 0.9353 Ref |
| MK448667 | Unassigned | Unassigned | Unassigned | 35_0  | Clustered           | 6 VC_35_0   | 6  | 0.2254 | 1          | 0.2254 | 0 | 0 | 0 | 0.8379 Ref |
| MK448671 | Unassigned | Unassigned | Unassigned | 626_0 | Clustered           | 23 VC_626_0 | 23 | 0.66   | 1          | 0.66   | 0 | 0 | 0 | 1 Ref      |
| MK448673 | Unassigned | Unassigned | Unassigned | 412_0 | Clustered           | 39 VC_412_0 | 39 | 0.845  | 1          | 0.845  | 0 | 0 | 0 | 0.7582 Ref |
| MK448674 | Unassigned | Unassigned | Unassigned | 775_1 | Clustered           | 14 VC_775_1 | 14 | 0.2797 | 1          | 0.2797 | 0 | 0 | 0 | 0.9234 Ref |
| MK448675 | Unassigned | Unassigned | Unassigned | 632_0 | Clustered           | 37 VC_632_0 | 37 | 0.581  | 1          | 0.581  | 0 | 0 | 0 | 0.8187 Ref |
| MK448676 | Unassigned | Unassigned | Unassigned | 293_3 | Clustered           | 19 VC_293_3 | 19 | 0.2627 | 1          | 0.2627 | 0 | 0 | 0 | 0.8187 Ref |
| MK448678 | Unassigned | Unassigned | Unassigned | 293_3 | Clustered           | 19 VC_293_3 | 19 | 0.2627 | 1          | 0.2627 | 0 | 0 | 0 | 1 Ref      |
| MK448680 | Unassigned | Unassigned | Unassigned | 773_0 | Clustered           | 23 VC_773_0 | 23 | 0.5514 | 1          | 0.5514 | 0 | 0 | 0 | 1 Ref      |
| MK448681 | Unassigned | Unassigned | Unassigned | 419_0 | Clustered           | 5 VC_419_0  | 5  | 0.2498 | 0.99999997 | 0.2498 | 0 | 0 | 0 | 1 Ref      |
| MK448683 | Unassigned | Unassigned | Unassigned | 636_0 | Clustered           | 9 VC_636_0  | 9  | 0.2422 | 1          | 0.2422 | 0 | 0 | 0 | 0.9722 Ref |
| MK448684 | Unassigned | Unassigned | Unassigned | 636_0 | Clustered           | 9 VC_636_0  | 9  | 0.2422 | 1          | 0.2422 | 0 | 0 | 0 | 0.9722 Ref |
| MK448684 | Unassigned | Unassigned | Unassigned | 419_0 | Clustered           | 5 VC_419_0  | 5  | 0.2498 | 0.99999997 | 0.2498 | 0 | 0 | 0 | 1 Ref      |
| MK448685 | Unassigned | Unassigned | Unassigned | 317_0 | Clustered           | 18 VC_317_0 | 18 | 0.3304 | 1          | 0.3304 | 0 | 0 | 0 | 1 Ref      |
| MK448686 | Unassigned | Unassigned | Unassigned | 416_0 | Clustered           | 14 VC_416_0 | 14 | 0.2592 | 1          | 0.2592 | 0 | 0 | 0 | 0.989 Ref  |
| MK448688 | Unassigned | Unassigned | Unassigned | 293_3 | Clustered           | 19 VC_293_3 | 19 | 0.2627 | 1          | 0.2627 | 0 | 0 | 0 | 0.8187 Ref |
| MK448689 | Unassigned | Unassigned | Unassigned | 773_0 | Clustered           | 23 VC_773_0 | 23 | 0.5514 | 1          | 0.5514 | 0 | 0 | 0 | 1 Ref      |
| MK448690 | Unassigned | Unassigned | Unassigned | 293_3 | Clustered           | 19 VC_293_3 | 19 | 0.2627 | 1          | 0.2627 | 0 | 0 | 0 | 0.8187 Ref |
| MK448692 | Unassigned | Unassigned | Unassigned | 431_0 | Clustered           | 9 VC_431_0  | 9  | 0.1673 | 1          | 0.1673 | 0 | 0 | 0 | 1 Ref      |
| MK448693 | Unassigned | Unassigned | Unassigned | 773_0 | Clustered           | 23 VC_773_0 | 23 | 0.5514 | 1          | 0.5514 | 0 | 0 | 0 | 1 Ref      |
| MK448694 | Unassigned | Unassigned | Unassigned | 293_3 | Clustered           | 19 VC_293_3 | 19 | 0.2627 | 1          | 0.2627 | 0 | 0 | 0 | 0.8187 Ref |
| MK448696 | Unassigned | Unassigned | Unassigned | 773_0 | Clustered           | 23 VC_773_0 | 23 | 0.5514 | 1          | 0.5514 | 0 | 0 | 0 | 1 Ref      |
| MK448697 | Unassigned | Unassigned | Unassigned | 773_0 | Clustered           | 23 VC_773_0 | 23 | 0.5514 | 1          | 0.5514 | 0 | 0 | 0 | 1 Ref      |
| MK448698 | Unassigned | Unassigned | Unassigned | 419_0 | Clustered           | 5 VC_419_0  | 5  | 0.2498 | 0.99999997 | 0.2498 | 0 | 0 | 0 | 1 Ref      |
| MK448699 | Unassigned | Unassigned | Unassigned | 773_0 | Clustered           | 23 VC_773_0 | 23 | 0.5514 | 1          | 0.5514 | 0 | 0 | 0 | 1 Ref      |
| MK448700 | Unassigned | Unassigned | Unassigned | 626_0 | Clustered           | 23 VC_626_0 | 23 | 0.66   | 1          | 0.66   | 0 | 0 | 0 | 0.8379 Ref |
| MK448702 | Unassigned | Unassigned | Unassigned | 431_0 | Clustered           | 9 VC_431_0  | 9  | 0.1673 | 1          | 0.1673 | 0 | 0 | 0 | 1 Ref      |
| MK448704 | Unassigned | Unassigned | Unassigned | 292_0 | Clustered           | 4 VC_292_0  | 4  | 0.1677 | 0.99998671 | 0.1677 | 0 | 0 | 0 | 1 Ref      |
| MK448706 | Unassigned | Unassigned | Unassigned | 317_1 | Clustered           | 2 VC_317_1  | 2  | 0.0186 | 0.95657151 | 0.0178 | 0 | 0 | 0 | 1 Ref      |
| MK448707 | Unassigned | Unassigned | Unassigned | 292_0 | Clustered           | 4 VC_292_0  | 4  | 0.1677 | 0.99998671 | 0.1677 | 0 | 0 | 0 | 1 Ref      |
| MK448708 | Unassigned | Unassigned | Unassigned | 412_0 | Clustered           | 39 VC_412_0 | 39 | 0.845  | 1          | 0.845  | 0 | 0 | 0 | 1 Ref      |
| MK448709 | Unassigned | Unassigned | Unassigned | 292_0 | Clustered           | 4 VC_292_0  | 4  | 0.1677 | 0.99998671 | 0.1677 | 0 | 0 | 0 | 1 Ref      |
| MK448710 | Unassigned | Unassigned | Unassigned | 292_0 | Clustered           | 4 VC_292_0  | 4  | 0.1677 | 0.99998671 | 0.1677 | 0 | 0 | 0 | 1 Ref      |
| MK448711 | Unassigned | Unassigned | Unassigned | 431_0 | Clustered           | 9 VC_431_0  | 9  | 0.1673 | 1          | 0.1673 | 0 | 0 | 0 | 1 Ref      |
| MK448714 | Unassigned | Unassigned | Unassigned | 412_0 | Clustered           | 39 VC_412_0 | 39 | 0.845  | 1          | 0.845  | 0 | 0 | 0 | 1 Ref      |



|          |            |            |            |       |                     |             |    |        |            |        |   |   |   |   |            |
|----------|------------|------------|------------|-------|---------------------|-------------|----|--------|------------|--------|---|---|---|---|------------|
| MK448716 | Unassigned | Unassigned | Unassigned | 431_0 | Clustered           | 9 VC_431_0  | 9  | 0.1673 | 1          | 0.1673 | 0 | 0 | 0 | 0 | 1 Ref      |
| MK448720 | Unassigned | Unassigned | Unassigned | 626_0 | Clustered           | 23 VC_626_0 | 23 | 0.66   |            | 0.66   | 0 | 0 | 0 | 0 | 0.8379 Ref |
| MK448721 | Unassigned | Unassigned | Unassigned | 317_1 | Clustered           | 2 VC_317_1  | 2  | 0.0186 | 0.95657151 | 0.0178 | 0 | 0 | 0 | 0 | 1 Ref      |
| MK448724 | Unassigned | Unassigned | Unassigned | 431_0 | Clustered           | 9 VC_431_0  | 9  | 0.1673 | 1          | 0.1673 | 0 | 0 | 0 | 0 | 1 Ref      |
| MK448730 | Unassigned | Unassigned | Unassigned | 431_0 | Clustered           | 9 VC_431_0  | 9  | 0.1673 | 1          | 0.1673 | 0 | 0 | 0 | 0 | 1 Ref      |
| MK448732 | Unassigned | Unassigned | Unassigned | 333_0 | Clustered           | 25 VC_333_0 | 25 | 0.4681 | 1          | 0.4681 | 0 | 0 | 0 | 0 | 1 Ref      |
| MK448733 | Unassigned | Unassigned | Unassigned | 413_0 | Clustered           | 3 VC_413_0  | 3  | 0.0415 | 0.99841754 | 0.0415 | 0 | 0 | 0 | 0 | 1 Ref      |
| MK448735 | Unassigned | Unassigned | Unassigned | 323_1 | Clustered           | 9 VC_323_1  | 9  | 0.1798 | 1          | 0.1798 | 0 | 0 | 0 | 0 | 0.75 Ref   |
| MK448739 | Unassigned | Unassigned | Unassigned | 333_0 | Clustered           | 25 VC_333_0 | 25 | 0.4681 | 1          | 0.4681 | 0 | 0 | 0 | 0 | 1 Ref      |
| MK448740 | Unassigned | Unassigned | Unassigned | 293_2 | Clustered           | 2 VC_293_2  | 2  | 0.0311 | 0.95710449 | 0.0298 | 0 | 0 | 0 | 0 | 1 Ref      |
| MK448741 | Unassigned | Unassigned | Unassigned | 632_0 | Clustered           | 37 VC_632_0 | 37 | 0.581  | 1          | 0.581  | 0 | 0 | 0 | 0 | 0.9234 Ref |
| MK448744 | Unassigned | Unassigned | Unassigned | 431_0 | Clustered           | 9 VC_431_0  | 9  | 0.1673 | 1          | 0.1673 | 0 | 0 | 0 | 0 | 1 Ref      |
| MK448745 | Unassigned | Unassigned | Unassigned | 431_0 | Clustered           | 9 VC_431_0  | 9  | 0.1673 | 1          | 0.1673 | 0 | 0 | 0 | 0 | 1 Ref      |
| MK448750 | Unassigned | Unassigned | Unassigned | 293_0 | Clustered/Singleton | 1 VC_293_0  | 1  | 0      | 1          | 0      | 0 | 0 | 0 | 0 | 1 Ref      |
| MK448752 | Unassigned | Unassigned | Unassigned | 632_0 | Clustered           | 37 VC_632_0 | 37 | 0.581  | 1          | 0.581  | 0 | 0 | 0 | 0 | 0.9234 Ref |
| MK448757 | Unassigned | Unassigned | Unassigned | 323_1 | Clustered           | 9 VC_323_1  | 9  | 0.1798 | 1          | 0.1798 | 0 | 0 | 0 | 0 | 0.75 Ref   |
| MK448758 | Unassigned | Unassigned | Unassigned | 323_1 | Clustered           | 9 VC_323_1  | 9  | 0.1798 | 1          | 0.1798 | 0 | 0 | 0 | 0 | 0.75 Ref   |
| MK448759 | Unassigned | Unassigned | Unassigned | 323_1 | Clustered           | 9 VC_323_1  | 9  | 0.1798 | 1          | 0.1798 | 0 | 0 | 0 | 0 | 0.75 Ref   |
| MK448762 | Unassigned | Unassigned | Unassigned | 416_0 | Clustered           | 14 VC_416_0 | 14 | 0.2592 | 1          | 0.2592 | 0 | 0 | 0 | 0 | 0.989 Ref  |
| MK448763 | Unassigned | Unassigned | Unassigned | 317_0 | Clustered           | 18 VC_317_0 | 18 | 0.3304 | 1          | 0.3304 | 0 | 0 | 0 | 0 | 1 Ref      |
| MK448765 | Unassigned | Unassigned | Unassigned | 775_1 | Clustered           | 14 VC_775_1 | 14 | 0.2797 | 1          | 0.2797 | 0 | 0 | 0 | 0 | 0.7582 Ref |
| MK448766 | Unassigned | Unassigned | Unassigned | 773_0 | Clustered           | 23 VC_773_0 | 23 | 0.5514 | 1          | 0.5514 | 0 | 0 | 0 | 0 | 1 Ref      |
| MK448767 | Unassigned | Unassigned | Unassigned | 317_0 | Clustered           | 18 VC_317_0 | 18 | 0.3304 | 1          | 0.3304 | 0 | 0 | 0 | 0 | 1 Ref      |
| MK448769 | Unassigned | Unassigned | Unassigned | 419_0 | Clustered           | 5 VC_419_0  | 5  | 0.2498 | 0.99999997 | 0.2498 | 0 | 0 | 0 | 0 | 1 Ref      |
| MK448771 | Unassigned | Unassigned | Unassigned | 317_0 | Clustered           | 18 VC_317_0 | 18 | 0.3304 | 1          | 0.3304 | 0 | 0 | 0 | 0 | 1 Ref      |
| MK448772 | Unassigned | Unassigned | Unassigned | 293_3 | Clustered           | 19 VC_293_3 | 19 | 0.2627 | 1          | 0.2627 | 0 | 0 | 0 | 0 | 0.8187 Ref |
| MK448773 | Unassigned | Unassigned | Unassigned | 317_0 | Clustered           | 18 VC_317_0 | 18 | 0.3304 | 1          | 0.3304 | 0 | 0 | 0 | 0 | 1 Ref      |
| MK448774 | Unassigned | Unassigned | Unassigned | 317_0 | Clustered           | 18 VC_317_0 | 18 | 0.3304 | 1          | 0.3304 | 0 | 0 | 0 | 0 | 1 Ref      |
| MK448775 | Unassigned | Unassigned | Unassigned | 775_1 | Clustered           | 14 VC_775_1 | 14 | 0.2797 | 1          | 0.2797 | 0 | 0 | 0 | 0 | 0.7582 Ref |
| MK448777 | Unassigned | Unassigned | Unassigned | 317_0 | Clustered           | 18 VC_317_0 | 18 | 0.3304 | 1          | 0.3304 | 0 | 0 | 0 | 0 | 1 Ref      |
| MK448778 | Unassigned | Unassigned | Unassigned | 293_3 | Clustered           | 19 VC_293_3 | 19 | 0.2627 | 1          | 0.2627 | 0 | 0 | 0 | 0 | 0.8187 Ref |
| MK448779 | Unassigned | Unassigned | Unassigned | 773_0 | Clustered           | 23 VC_773_0 | 23 | 0.5514 | 1          | 0.5514 | 0 | 0 | 0 | 0 | 1 Ref      |
| MK448782 | Unassigned | Unassigned | Unassigned | 293_3 | Clustered           | 19 VC_293_3 | 19 | 0.2627 | 1          | 0.2627 | 0 | 0 | 0 | 0 | 0.8187 Ref |
| MK448783 | Unassigned | Unassigned | Unassigned | 773_0 | Clustered           | 23 VC_773_0 | 23 | 0.5514 | 1          | 0.5514 | 0 | 0 | 0 | 0 | 1 Ref      |
| MK448784 | Unassigned | Unassigned | Unassigned | 636_0 | Clustered           | 9 VC_636_0  | 9  | 0.2422 | 1          | 0.2422 | 0 | 0 | 0 | 0 | 0.9722 Ref |
| MK448784 | Unassigned | Unassigned | Unassigned | 773_0 | Clustered           | 23 VC_773_0 | 23 | 0.5514 | 1          | 0.5514 | 0 | 0 | 0 | 0 | 1 Ref      |
| MK448786 | Unassigned | Unassigned | Unassigned | 317_0 | Clustered           | 18 VC_317_0 | 18 | 0.3304 | 1          | 0.3304 | 0 | 0 | 0 | 0 | 1 Ref      |
| MK448788 | Unassigned | Unassigned | Unassigned | 416_0 | Clustered           | 14 VC_416_0 | 14 | 0.2592 | 1          | 0.2592 | 0 | 0 | 0 | 0 | 0.989 Ref  |
| MK448789 | Unassigned | Unassigned | Unassigned | 773_0 | Clustered           | 23 VC_773_0 | 23 | 0.5514 | 1          | 0.5514 | 0 | 0 | 0 | 0 | 1 Ref      |
| MK448790 | Unassigned | Unassigned | Unassigned | 636_0 | Clustered           | 9 VC_636_0  | 9  | 0.2422 | 1          | 0.2422 | 0 | 0 | 0 | 0 | 0.9722 Ref |
| MK448791 | Unassigned | Unassigned | Unassigned | 416_0 | Clustered           | 14 VC_416_0 | 14 | 0.2592 | 1          | 0.2592 | 0 | 0 | 0 | 0 | 0.989 Ref  |
| MK448793 | Unassigned | Unassigned | Unassigned | 416_0 | Clustered           | 14 VC_416_0 | 14 | 0.2592 | 1          | 0.2592 | 0 | 0 | 0 | 0 | 0.989 Ref  |
| MK448794 | Unassigned | Unassigned | Unassigned | 775_1 | Clustered           | 14 VC_775_1 | 14 | 0.2797 | 1          | 0.2797 | 0 | 0 | 0 | 0 | 0.7582 Ref |
| MK448795 | Unassigned | Unassigned | Unassigned | 775_1 | Clustered           | 14 VC_775_1 | 14 | 0.2797 | 1          | 0.2797 | 0 | 0 | 0 | 0 | 0.7582 Ref |
| MK448797 | Unassigned | Unassigned | Unassigned | 773_0 | Clustered           | 23 VC_773_0 | 23 | 0.5514 | 1          | 0.5514 | 0 | 0 | 0 | 0 | 1 Ref      |
| MK448798 | Unassigned | Unassigned | Unassigned | 636_0 | Clustered           | 9 VC_636_0  | 9  | 0.2422 | 1          | 0.2422 | 0 | 0 | 0 | 0 | 0.9722 Ref |
| MK448804 | Unassigned | Unassigned | Unassigned | 335_0 | Clustered           | 6 VC_335_0  | 6  | 0.3678 | 1          | 0.3678 | 0 | 0 | 0 | 0 | 1 Ref      |
| MK448805 | Unassigned | Unassigned | Unassigned | 335_0 | Clustered           | 6 VC_335_0  | 6  | 0.3678 | 1          | 0.3678 | 0 | 0 | 0 | 0 | 1 Ref      |
| MK448807 | Unassigned | Unassigned | Unassigned | 335_0 | Clustered           | 6 VC_335_0  | 6  | 0.3678 | 1          | 0.3678 | 0 | 0 | 0 | 0 | 1 Ref      |
| MK448808 | Unassigned | Unassigned | Unassigned | 335_0 | Clustered           | 6 VC_335_0  | 6  | 0.3678 | 1          | 0.3678 | 0 | 0 | 0 | 0 | 1 Ref      |
| MK448811 | Unassigned | Unassigned | Unassigned | 632_0 | Clustered           | 37 VC_632_0 | 37 | 0.581  | 1          | 0.581  | 0 | 0 | 0 | 0 | 0.9234 Ref |
| MK448814 | Unassigned | Unassigned | Unassigned | 317_2 | Clustered           | 20 VC_317_2 | 20 | 0.1976 | 1          | 0.1976 | 0 | 0 | 0 | 0 | 0.6842 Ref |
| MK448815 | Unassigned | Unassigned | Unassigned | 335_0 | Clustered           | 6 VC_335_0  | 6  | 0.3678 | 1          | 0.3678 | 0 | 0 | 0 | 0 | 1 Ref      |
| MK448818 | Unassigned | Unassigned | Unassigned | 623_0 | Clustered/Singleton | 1 VC_623_0  | 1  | 0      | 1          | 0      | 0 | 0 | 0 | 0 | 1 Ref      |
| MK448819 | Unassigned | Unassigned | Unassigned | 632_0 | Clustered           | 37 VC_632_0 | 37 | 0.581  | 1          | 0.581  | 0 | 0 | 0 | 0 | 0.9234 Ref |
| MK448821 | Unassigned | Unassigned | Unassigned | 323_0 | Clustered           | 2 VC_323_0  | 2  | 0.0281 | 0.95656566 | 0.0269 | 0 | 0 | 0 | 0 | 1 Ref      |
| MK448822 | Unassigned | Unassigned | Unassigned | 323_0 | Clustered           | 2 VC_323_0  | 2  | 0.0281 | 0.95656566 | 0.0269 | 0 | 0 | 0 | 0 | 1 Ref      |
| MK448824 | Unassigned | Unassigned | Unassigned | 259_0 | Clustered           | 3 VC_259_0  | 3  | 0.1148 | 0.99858602 | 0.1146 | 0 | 0 | 0 | 0 | 1 Ref      |
| MK448828 | Unassigned | Unassigned | Unassigned | 632_0 | Clustered           | 37 VC_632_0 | 37 | 0.581  | 1          | 0.581  | 0 | 0 | 0 | 0 | 0.9234 Ref |
| MK448831 | Unassigned | Unassigned | Unassigned | 412_0 | Clustered           | 39 VC_412_0 | 39 | 0.845  | 1          | 0.845  | 0 | 0 | 0 | 0 | 1 Ref      |
| MK448832 | Unassigned | Unassigned | Unassigned | 294_0 | Clustered           | 2 VC_294_0  | 2  | 0.0836 | 0.95731776 | 0.0801 | 0 | 0 | 0 | 0 | 1 Ref      |
| MK448833 | Unassigned | Unassigned | Unassigned | 636_0 | Clustered           | 9 VC_636_0  | 9  | 0.2422 | 1          | 0.2422 | 0 | 0 | 0 | 0 | 0.9722 Ref |
| MK448834 | Unassigned | Unassigned | Unassigned | 412_0 | Clustered           | 39 VC_412_0 | 39 | 0.845  | 1          | 0.845  | 0 | 0 | 0 | 0 | 1 Ref      |
| MK448839 | Unassigned | Unassigned | Unassigned | 626_0 | Clustered           | 23 VC_626_0 | 23 | 0.66   | 1          | 0.66   | 0 | 0 | 0 | 0 | 0.8379 Ref |
| MK448841 | Unassigned | Unassigned | Unassigned | 626_0 | Clustered           | 23 VC_626_0 | 23 | 0.66   | 1          | 0.66   | 0 | 0 | 0 | 0 | 0.8379 Ref |
| MK448843 | Unassigned | Unassigned | Unassigned | 626_0 | Clustered           | 23 VC_626_0 | 23 | 0.66   | 1          | 0.66   | 0 | 0 | 0 | 0 | 0.8379 Ref |
| MK448845 | Unassigned | Unassigned | Unassigned | 317_0 | Clustered           | 18 VC_317_0 | 18 | 0.3304 | 1          | 0.3304 | 0 | 0 | 0 | 0 | 1 Ref      |
| MK448850 | Unassigned | Unassigned | Unassigned | 293_3 | Clustered           | 19 VC_293_3 | 19 | 0.2627 | 1          | 0.2627 | 0 | 0 | 0 | 0 | 0.8187 Ref |
| MK448852 | Unassigned | Unassigned | Unassigned | 773_0 | Clustered           | 23 VC_773_0 | 23 | 0.5514 | 1          | 0.5514 | 0 | 0 | 0 | 0 | 1 Ref      |
| MK448853 | Unassigned | Unassigned | Unassigned | 317_0 | Clustered           | 18 VC_317_0 | 18 | 0.3304 | 1          | 0.3304 | 0 | 0 | 0 | 0 | 1 Ref      |
| MK448854 | Unassigned | Unassigned | Unassigned | 775_0 | Clustered           | 3 VC_775_0  | 3  | 0.0364 | 0.99850073 | 0.0364 | 0 | 0 | 0 | 0 | 1 Ref      |
| MK448855 | Unassigned | Unassigned | Unassigned | 317_0 | Clustered           | 18 VC_317_0 | 18 | 0.3304 | 1          | 0.3304 | 0 | 0 | 0 | 0 | 1 Ref      |
| MK448858 | Unassigned | Unassigned | Unassigned | 775_1 | Clustered           | 14 VC_775_1 | 14 | 0.2797 | 1          | 0.2797 | 0 | 0 | 0 | 0 | 0.7582 Ref |
| MK448859 | Unassigned | Unassigned | Unassigned | 293_3 | Clustered           | 19 VC_293_3 | 19 | 0.2627 | 1          | 0.2627 | 0 | 0 | 0 | 0 | 0.8187 Ref |
| MK448861 | Unassigned | Unassigned | Unassigned | 412_0 | Clustered           | 39 VC_412_0 | 39 | 0.845  | 1          | 0.845  | 0 | 0 | 0 | 0 | 1 Ref      |
| MK448862 | Unassigned | Unassigned | Unassigned | 416_0 | Clustered           | 14 VC_416_0 | 14 | 0.2592 | 1          | 0.2592 | 0 | 0 | 0 | 0 | 0.989 Ref  |
| MK448864 | Unassigned | Unassigned | Unassigned | 775_1 | Clustered           | 14 VC_775_1 | 14 | 0.2797 | 1          | 0.2797 | 0 | 0 | 0 | 0 | 0.7582 Ref |
| MK448866 | Unassigned | Unassigned | Unassigned | 773_0 | Clustered           | 23 VC_773_0 | 23 | 0.5514 | 1          | 0.5514 | 0 | 0 | 0 | 0 | 1 Ref      |
| MK448867 | Unassigned | Unassigned | Unassigned | 773_0 | Clustered           | 23 VC_773_0 | 23 | 0.5514 | 1          | 0.5514 | 0 | 0 | 0 | 0 | 1 Ref      |
| MK448868 | Unassigned | Unassigned | Unassigned | 773_0 | Clustered           | 23 VC_773_0 | 23 | 0.5514 | 1          | 0.5514 | 0 | 0 | 0 | 0 | 1 Ref      |
| MK448871 | Unassigned | Unassigned | Unassigned | 773_0 | Clustered           | 23 VC_773_0 | 23 | 0.5514 | 1          | 0.5514 | 0 | 0 | 0 | 0 | 1 Ref      |
| MK448874 | Unassigned | Unassigned | Unassigned | 412_0 | Clustered           | 39 VC_412_0 | 39 | 0.845  | 1          | 0.845  | 0 | 0 | 0 | 0 | 1 Ref      |



|          |            |            |            |       |                     |             |    |        |            |        |   |   |   |            |
|----------|------------|------------|------------|-------|---------------------|-------------|----|--------|------------|--------|---|---|---|------------|
| MK448875 | Unassigned | Unassigned | Unassigned | 412_0 | Clustered           | 39 VC_412_0 | 39 | 0.845  | 1          | 0.845  | 0 | 0 | 0 | 1 Ref      |
| MK448877 | Unassigned | Unassigned | Unassigned | 293_3 | Clustered           | 19 VC_293_3 | 19 | 0.2627 | 1          | 0.2627 | 0 | 0 | 0 | 0.8187 Ref |
| MK448881 | Unassigned | Unassigned | Unassigned | 317_2 | Clustered           | 20 VC_317_2 | 20 | 0.1976 | 1          | 0.1976 | 0 | 0 | 0 | 0.6842 Ref |
| MK448882 | Unassigned | Unassigned | Unassigned | 317_2 | Clustered           | 20 VC_317_2 | 20 | 0.1976 | 1          | 0.1976 | 0 | 0 | 0 | 0.6842 Ref |
| MK448886 | Unassigned | Unassigned | Unassigned | 412_0 | Clustered           | 39 VC_412_0 | 39 | 0.845  | 1          | 0.845  | 0 | 0 | 0 | 1 Ref      |
| MK448887 | Unassigned | Unassigned | Unassigned | 412_0 | Clustered           | 39 VC_412_0 | 39 | 0.845  | 1          | 0.845  | 0 | 0 | 0 | 1 Ref      |
| MK448890 | Unassigned | Unassigned | Unassigned | 625_0 | Clustered           | 2 VC_625_0  | 2  | 0.0259 | 0.92480562 | 0.0239 | 0 | 0 | 0 | 1 Ref      |
| MK448893 | Unassigned | Unassigned | Unassigned | 323_1 | Clustered           | 9 VC_323_1  | 9  | 0.1798 | 1          | 0.1798 | 0 | 0 | 0 | 0.75 Ref   |
| MK448895 | Unassigned | Unassigned | Unassigned | 419_0 | Clustered           | 5 VC_419_0  | 5  | 0.2498 | 0.99999997 | 0.2498 | 0 | 0 | 0 | 1 Ref      |
| MK448896 | Unassigned | Unassigned | Unassigned | 317_2 | Clustered           | 20 VC_317_2 | 20 | 0.1976 | 1          | 0.1976 | 0 | 0 | 0 | 0.6842 Ref |
| MK448897 | Unassigned | Unassigned | Unassigned | 412_0 | Clustered           | 39 VC_412_0 | 39 | 0.845  | 1          | 0.845  | 0 | 0 | 0 | 1 Ref      |
| MK448898 | Unassigned | Unassigned | Unassigned | 412_0 | Clustered           | 39 VC_412_0 | 39 | 0.845  | 1          | 0.845  | 0 | 0 | 0 | 1 Ref      |
| MK448899 | Unassigned | Unassigned | Unassigned | 253_0 | Clustered/Singleton | 1 VC_253_0  | 1  | 0      | 1          | 0      | 0 | 0 | 0 | 1 Ref      |
| MK448900 | Unassigned | Unassigned | Unassigned | 317_4 | Clustered/Singleton | 1 VC_317_4  | 1  | 0      | 1          | 0      | 0 | 0 | 0 | 1 Ref      |
| MK448901 | Unassigned | Unassigned | Unassigned | 333_0 | Clustered           | 25 VC_333_0 | 25 | 0.4681 | 1          | 0.4681 | 0 | 0 | 0 | 1 Ref      |
| MK448902 | Unassigned | Unassigned | Unassigned | 137_1 | Clustered/Singleton | 1 VC_137_1  | 1  | 0      | 1          | 0      | 0 | 0 | 0 | 1 Ref      |
| MK448904 | Unassigned | Unassigned | Unassigned | 413_0 | Clustered           | 3 VC_413_0  | 3  | 0.0415 | 0.99841754 | 0.0415 | 0 | 0 | 0 | 1 Ref      |
| MK448905 | Unassigned | Unassigned | Unassigned | 412_0 | Clustered           | 39 VC_412_0 | 39 | 0.845  | 1          | 0.845  | 0 | 0 | 0 | 1 Ref      |
| MK448909 | Unassigned | Unassigned | Unassigned | 317_2 | Clustered           | 20 VC_317_2 | 20 | 0.1976 | 1          | 0.1976 | 0 | 0 | 0 | 0.6842 Ref |
| MK448910 | Unassigned | Unassigned | Unassigned | 137_0 | Clustered           | 3 VC_137_0  | 3  | 0.1129 | 0.998547   | 0.1128 | 0 | 0 | 0 | 1 Ref      |
| MK448912 | Unassigned | Unassigned | Unassigned | 333_0 | Clustered           | 25 VC_333_0 | 25 | 0.4681 | 1          | 0.4681 | 0 | 0 | 0 | 1 Ref      |
| MK448914 | Unassigned | Unassigned | Unassigned | 333_0 | Clustered           | 25 VC_333_0 | 25 | 0.4681 | 1          | 0.4681 | 0 | 0 | 0 | 1 Ref      |
| MK448915 | Unassigned | Unassigned | Unassigned | 323_1 | Clustered           | 9 VC_323_1  | 9  | 0.1798 | 1          | 0.1798 | 0 | 0 | 0 | 0.75 Ref   |
| MK448917 | Unassigned | Unassigned | Unassigned | 293_2 | Clustered           | 2 VC_293_2  | 2  | 0.0311 | 0.95710449 | 0.0298 | 0 | 0 | 0 | 1 Ref      |
| MK448918 | Unassigned | Unassigned | Unassigned | 333_0 | Clustered           | 25 VC_333_0 | 25 | 0.4681 | 1          | 0.4681 | 0 | 0 | 0 | 1 Ref      |
| MK448920 | Unassigned | Unassigned | Unassigned | 333_0 | Clustered           | 25 VC_333_0 | 25 | 0.4681 | 1          | 0.4681 | 0 | 0 | 0 | 1 Ref      |
| MK448923 | Unassigned | Unassigned | Unassigned | 431_0 | Clustered           | 9 VC_431_0  | 9  | 0.1673 | 1          | 0.1673 | 0 | 0 | 0 | 1 Ref      |
| MK448925 | Unassigned | Unassigned | Unassigned | 412_0 | Clustered           | 39 VC_412_0 | 39 | 0.845  | 1          | 0.845  | 0 | 0 | 0 | 1 Ref      |
| MK448927 | Unassigned | Unassigned | Unassigned | 412_0 | Clustered           | 39 VC_412_0 | 39 | 0.845  | 1          | 0.845  | 0 | 0 | 0 | 1 Ref      |
| MK448930 | Unassigned | Unassigned | Unassigned | 625_0 | Clustered           | 2 VC_625_0  | 2  | 0.0259 | 0.92480562 | 0.0239 | 0 | 0 | 0 | 1 Ref      |
| MK448931 | Unassigned | Unassigned | Unassigned | 293_3 | Clustered           | 19 VC_293_3 | 19 | 0.2627 | 1          | 0.2627 | 0 | 0 | 0 | 0.8187 Ref |
| MK448933 | Unassigned | Unassigned | Unassigned | 775_0 | Clustered           | 3 VC_775_0  | 3  | 0.0364 | 0.99850073 | 0.0364 | 0 | 0 | 0 | 1 Ref      |
| MK448934 | Unassigned | Unassigned | Unassigned | 626_0 | Clustered           | 23 VC_626_0 | 23 | 0.66   | 1          | 0.66   | 0 | 0 | 0 | 0.8379 Ref |
| MK448939 | Unassigned | Unassigned | Unassigned | 323_1 | Clustered           | 9 VC_323_1  | 9  | 0.1798 | 1          | 0.1798 | 0 | 0 | 0 | 0.75 Ref   |
| MK448941 | Unassigned | Unassigned | Unassigned | 775_1 | Clustered           | 14 VC_775_1 | 14 | 0.2797 | 1          | 0.2797 | 0 | 0 | 0 | 0.7582 Ref |
| MK448942 | Unassigned | Unassigned | Unassigned | 317_0 | Clustered           | 18 VC_317_0 | 18 | 0.3304 | 1          | 0.3304 | 0 | 0 | 0 | 1 Ref      |
| MK448943 | Unassigned | Unassigned | Unassigned | 317_0 | Clustered           | 18 VC_317_0 | 18 | 0.3304 | 1          | 0.3304 | 0 | 0 | 0 | 1 Ref      |
| MK448944 | Unassigned | Unassigned | Unassigned | 775_1 | Clustered           | 14 VC_775_1 | 14 | 0.2797 | 1          | 0.2797 | 0 | 0 | 0 | 0.7582 Ref |
| MK448945 | Unassigned | Unassigned | Unassigned | 775_1 | Clustered           | 14 VC_775_1 | 14 | 0.2797 | 1          | 0.2797 | 0 | 0 | 0 | 0.7582 Ref |
| MK448946 | Unassigned | Unassigned | Unassigned | 775_1 | Clustered           | 14 VC_775_1 | 14 | 0.2797 | 1          | 0.2797 | 0 | 0 | 0 | 0.7582 Ref |
| MK448947 | Unassigned | Unassigned | Unassigned | 773_0 | Clustered           | 23 VC_773_0 | 23 | 0.5514 | 1          | 0.5514 | 0 | 0 | 0 | 1 Ref      |
| MK448949 | Unassigned | Unassigned | Unassigned | 416_0 | Clustered           | 14 VC_416_0 | 14 | 0.2592 | 1          | 0.2592 | 0 | 0 | 0 | 0.989 Ref  |
| MK448950 | Unassigned | Unassigned | Unassigned | 775_0 | Clustered           | 3 VC_775_0  | 3  | 0.0364 | 0.99850073 | 0.0364 | 0 | 0 | 0 | 1 Ref      |
| MK448951 | Unassigned | Unassigned | Unassigned | 416_0 | Clustered           | 14 VC_416_0 | 14 | 0.2592 | 1          | 0.2592 | 0 | 0 | 0 | 0.989 Ref  |
| MK448952 | Unassigned | Unassigned | Unassigned | 773_0 | Clustered           | 23 VC_773_0 | 23 | 0.5514 | 1          | 0.5514 | 0 | 0 | 0 | 1 Ref      |
| MK448953 | Unassigned | Unassigned | Unassigned | 775_1 | Clustered           | 14 VC_775_1 | 14 | 0.2797 | 1          | 0.2797 | 0 | 0 | 0 | 0.7582 Ref |
| MK448954 | Unassigned | Unassigned | Unassigned | 416_0 | Clustered           | 14 VC_416_0 | 14 | 0.2592 | 1          | 0.2592 | 0 | 0 | 0 | 0.989 Ref  |
| MK448955 | Unassigned | Unassigned | Unassigned | 293_3 | Clustered           | 19 VC_293_3 | 19 | 0.2627 | 1          | 0.2627 | 0 | 0 | 0 | 0.8187 Ref |
| MK448957 | Unassigned | Unassigned | Unassigned | 775_1 | Clustered           | 14 VC_775_1 | 14 | 0.2797 | 1          | 0.2797 | 0 | 0 | 0 | 0.7582 Ref |
| MK448958 | Unassigned | Unassigned | Unassigned | 416_0 | Clustered           | 14 VC_416_0 | 14 | 0.2592 | 1          | 0.2592 | 0 | 0 | 0 | 0.989 Ref  |
| MK448959 | Unassigned | Unassigned | Unassigned | 416_0 | Clustered           | 14 VC_416_0 | 14 | 0.2592 | 1          | 0.2592 | 0 | 0 | 0 | 0.989 Ref  |
| MK448960 | Unassigned | Unassigned | Unassigned | 416_0 | Clustered           | 14 VC_416_0 | 14 | 0.2592 | 1          | 0.2592 | 0 | 0 | 0 | 0.989 Ref  |
| MK448961 | Unassigned | Unassigned | Unassigned | 773_0 | Clustered           | 23 VC_773_0 | 23 | 0.5514 | 1          | 0.5514 | 0 | 0 | 0 | 1 Ref      |
| MK448962 | Unassigned | Unassigned | Unassigned | 293_3 | Clustered           | 19 VC_293_3 | 19 | 0.2627 | 1          | 0.2627 | 0 | 0 | 0 | 0.8187 Ref |
| MK448963 | Unassigned | Unassigned | Unassigned | 317_0 | Clustered           | 18 VC_317_0 | 18 | 0.3304 | 1          | 0.3304 | 0 | 0 | 0 | 1 Ref      |
| MK448964 | Unassigned | Unassigned | Unassigned | 317_0 | Clustered           | 18 VC_317_0 | 18 | 0.3304 | 1          | 0.3304 | 0 | 0 | 0 | 1 Ref      |
| MK448965 | Unassigned | Unassigned | Unassigned | 416_0 | Clustered           | 14 VC_416_0 | 14 | 0.2592 | 1          | 0.2592 | 0 | 0 | 0 | 0.989 Ref  |
| MK448966 | Unassigned | Unassigned | Unassigned | 293_3 | Clustered           | 19 VC_293_3 | 19 | 0.2627 | 1          | 0.2627 | 0 | 0 | 0 | 0.8187 Ref |
| MK448967 | Unassigned | Unassigned | Unassigned | 636_0 | Clustered           | 9 VC_636_0  | 9  | 0.2422 | 1          | 0.2422 | 0 | 0 | 0 | 0.9722 Ref |
| MK448968 | Unassigned | Unassigned | Unassigned | 773_0 | Clustered           | 23 VC_773_0 | 23 | 0.5514 | 1          | 0.5514 | 0 | 0 | 0 | 1 Ref      |
| MK448969 | Unassigned | Unassigned | Unassigned | 317_0 | Clustered           | 18 VC_317_0 | 18 | 0.3304 | 1          | 0.3304 | 0 | 0 | 0 | 1 Ref      |
| MK448970 | Unassigned | Unassigned | Unassigned | 775_1 | Clustered           | 14 VC_775_1 | 14 | 0.2797 | 1          | 0.2797 | 0 | 0 | 0 | 0.7582 Ref |
| MK448972 | Unassigned | Unassigned | Unassigned | 317_0 | Clustered           | 18 VC_317_0 | 18 | 0.3304 | 1          | 0.3304 | 0 | 0 | 0 | 1 Ref      |
| MK448973 | Unassigned | Unassigned | Unassigned | 293_3 | Clustered           | 19 VC_293_3 | 19 | 0.2627 | 1          | 0.2627 | 0 | 0 | 0 | 0.8187 Ref |
| MK448974 | Unassigned | Unassigned | Unassigned | 773_0 | Clustered           | 23 VC_773_0 | 23 | 0.5514 | 1          | 0.5514 | 0 | 0 | 0 | 1 Ref      |
| MK448975 | Unassigned | Unassigned | Unassigned | 293_3 | Clustered           | 19 VC_293_3 | 19 | 0.2627 | 1          | 0.2627 | 0 | 0 | 0 | 0.8187 Ref |
| MK448976 | Unassigned | Unassigned | Unassigned | 773_0 | Clustered           | 23 VC_773_0 | 23 | 0.5514 | 1          | 0.5514 | 0 | 0 | 0 | 1 Ref      |
| MK448977 | Unassigned | Unassigned | Unassigned | 416_0 | Clustered           | 14 VC_416_0 | 14 | 0.2592 | 1          | 0.2592 | 0 | 0 | 0 | 0.989 Ref  |
| MK448982 | Unassigned | Unassigned | Unassigned | 318_0 | Clustered           | 3 VC_318_0  | 3  | 0.0414 | 0.98579852 | 0.0408 | 0 | 0 | 0 | 1 Ref      |
| MK448983 | Unassigned | Unassigned | Unassigned | 632_0 | Clustered           | 37 VC_632_0 | 37 | 0.581  | 1          | 0.581  | 0 | 0 | 0 | 0.9234 Ref |
| MK448988 | Unassigned | Unassigned | Unassigned | 317_2 | Clustered           | 20 VC_317_2 | 20 | 0.1976 | 1          | 0.1976 | 0 | 0 | 0 | 0.6842 Ref |
| MK448989 | Unassigned | Unassigned | Unassigned | 317_2 | Clustered           | 20 VC_317_2 | 20 | 0.1976 | 1          | 0.1976 | 0 | 0 | 0 | 0.6842 Ref |
| MK448991 | Unassigned | Unassigned | Unassigned | 335_0 | Clustered           | 6 VC_335_0  | 6  | 0.3678 | 1          | 0.3678 | 0 | 0 | 0 | 1 Ref      |
| MK448995 | Unassigned | Unassigned | Unassigned | 293_1 | Clustered/Singleton | 1 VC_293_1  | 1  | 0      | 1          | 0      | 0 | 0 | 0 | 1 Ref      |
| MK448997 | Unassigned | Unassigned | Unassigned | 626_0 | Clustered           | 23 VC_626_0 | 23 | 0.66   | 1          | 0.66   | 0 | 0 | 0 | 0.8379 Ref |
| MK449000 | Unassigned | Unassigned | Unassigned | 334_0 | Clustered/Singleton | 1 VC_334_0  | 1  | 0      | 1          | 0      | 0 | 0 | 0 | 1 Ref      |
| MK449002 | Unassigned | Unassigned | Unassigned | 259_0 | Clustered           | 3 VC_259_0  | 3  | 0.1148 | 0.99858602 | 0.1146 | 0 | 0 | 0 | 1 Ref      |
| MK449003 | Unassigned | Unassigned | Unassigned | 259_0 | Clustered           | 3 VC_259_0  | 3  | 0.1148 | 0.99858602 | 0.1146 | 0 | 0 | 0 | 1 Ref      |
| MK449004 | Unassigned | Unassigned | Unassigned | 293_3 | Clustered           | 19 VC_293_3 | 19 | 0.2627 | 1          | 0.2627 | 0 | 0 | 0 | 0.8187 Ref |
| MK449006 | Unassigned | Unassigned | Unassigned | 412_0 | Clustered           | 39 VC_412_0 | 39 | 0.845  | 1          | 0.845  | 0 | 0 | 0 | 1 Ref      |
| MK449008 | Unassigned | Unassigned | Unassigned | 294_0 | Clustered           | 2 VC_294_0  | 2  | 0.0836 | 0.95731776 | 0.0801 | 0 | 0 | 0 | 1 Ref      |



|          |            |            |            |        |                     |              |     |        |            |        |   |   |   |            |
|----------|------------|------------|------------|--------|---------------------|--------------|-----|--------|------------|--------|---|---|---|------------|
| MK449009 | Unassigned | Unassigned | Unassigned | 412_0  | Clustered           | 39 VC_412_0  | 39  | 0.845  | 1          | 0.845  | 0 | 0 | 0 | 1 Ref      |
| MK449010 | Unassigned | Unassigned | Unassigned | 636_0  | Clustered           | 9 VC_636_0   | 9   | 0.2422 | 1          | 0.2422 | 0 | 0 | 0 | 0.9722 Ref |
| MK449012 | Unassigned | Unassigned | Unassigned | 317_0  | Clustered           | 18 VC_317_0  | 18  | 0.3304 | 1          | 0.3304 | 0 | 0 | 0 | 1 Ref      |
| MK450421 | Unassigned | Unassigned | Unassigned | 373_0  | Clustered           | 10 VC_373_0  | 10  | 0.7471 | 1          | 0.7471 | 0 | 0 | 0 | 1 Ref      |
| MK450422 | Unassigned | Unassigned | Unassigned | 558_65 | Clustered           | 2 VC_558_65  | 2   | 0.0032 | 0.61174182 | 0.0019 | 0 | 0 | 0 | 1 Ref      |
| MK450423 | Unassigned | Unassigned | Unassigned | 558_22 | Clustered           | 4 VC_558_22  | 4   | 0.01   | 0.99312819 | 0.0099 | 0 | 0 | 0 | 0.8333 Ref |
| MK450424 | Unassigned | Unassigned | Unassigned | 558_41 | Clustered/Singleton | 1 VC_558_41  | 1   | 0      | 1          | 0      | 0 | 0 | 0 | 1 Ref      |
| MK450425 | Unassigned | Unassigned | Unassigned | 558_57 | Clustered/Singleton | 1 VC_558_57  | 1   | 0      | 1          | 0      | 0 | 0 | 0 | 1 Ref      |
| MK450426 | Unassigned | Unassigned | Unassigned | 373_0  | Clustered           | 10 VC_373_0  | 10  | 0.7471 | 1          | 0.7471 | 0 | 0 | 0 | 1 Ref      |
| MK450427 | Unassigned | Unassigned | Unassigned | 558_14 | Clustered           | 8 VC_558_14  | 8   | 0.0228 | 0.99945246 | 0.0228 | 0 | 0 | 0 | 0.8214 Ref |
| MK450428 | Unassigned | Unassigned | Unassigned | 866_1  | Clustered           | 20 VC_866_1  | 20  | 0.4814 | 1          | 0.4814 | 0 | 0 | 0 | 1 Ref      |
| MK450429 | Unassigned | Unassigned | Unassigned | 558_50 | Clustered           | 15 VC_558_50 | 15  | 0.0468 | 1          | 0.0468 | 0 | 0 | 0 | 0.9238 Ref |
| MK450430 | Unassigned | Unassigned | Unassigned | 866_1  | Clustered           | 20 VC_866_1  | 20  | 0.4814 | 1          | 0.4814 | 0 | 0 | 0 | 1 Ref      |
| MK450431 | Unassigned | Unassigned | Unassigned | 373_0  | Clustered           | 10 VC_373_0  | 10  | 0.7471 | 1          | 0.7471 | 0 | 0 | 0 | 1 Ref      |
| MK450432 | Unassigned | Unassigned | Unassigned | 558_20 | Clustered           | 17 VC_558_20 | 17  | 0.054  | 1          | 0.054  | 0 | 0 | 0 | 0.9926 Ref |
| MK450433 | Unassigned | Unassigned | Unassigned | 373_0  | Clustered           | 10 VC_373_0  | 10  | 0.7471 | 1          | 0.7471 | 0 | 0 | 0 | 1 Ref      |
| MK450434 | Unassigned | Unassigned | Unassigned | 558_50 | Clustered           | 15 VC_558_50 | 15  | 0.0468 | 1          | 0.0468 | 0 | 0 | 0 | 0.9238 Ref |
| MK450435 | Unassigned | Unassigned | Unassigned | 866_1  | Clustered           | 20 VC_866_1  | 20  | 0.4814 | 1          | 0.4814 | 0 | 0 | 0 | 1 Ref      |
| MK450436 | Unassigned | Unassigned | Unassigned | 866_1  | Clustered           | 20 VC_866_1  | 20  | 0.4814 | 1          | 0.4814 | 0 | 0 | 0 | 1 Ref      |
| MK450538 | Unassigned | Unassigned | Unassigned | 15_1   | Clustered           | 9 VC_15_1    | 9   | 0.182  | 1          | 0.182  | 0 | 0 | 0 | 0.8889 Ref |
| MK450543 | Unassigned | Unassigned | Unassigned | 352_0  | Clustered           | 3 VC_352_0   | 3   | 0.7306 | 0.98867275 | 0.7223 | 0 | 0 | 0 | 1 Ref      |
| MK455769 | Unassigned | Unassigned | Unassigned | 1027_0 | Clustered           | 20 VC_1027_0 | 20  | 0.7114 | 1          | 0.7114 | 0 | 0 | 0 | 1 Ref      |
| MK455770 | Unassigned | Unassigned | Unassigned | 1027_0 | Clustered           | 20 VC_1027_0 | 20  | 0.7114 | 1          | 0.7114 | 0 | 0 | 0 | 1 Ref      |
| MK460245 | Unassigned | Unassigned | Unassigned | 981_1  | Clustered           | 26 VC_981_1  | 26  | 0.7009 | 1          | 0.7009 | 0 | 0 | 0 | 1 Ref      |
| MK460246 | Unassigned | Unassigned | Unassigned | 237_3  | Clustered           | 8 VC_237_3   | 8   | 0.1092 | 1          | 0.1092 | 0 | 0 | 0 | 1 Ref      |
| MK460247 | Unassigned | Unassigned | Unassigned | 236_0  | Clustered           | 72 VC_236_0  | 72  | 0.8104 | 1          | 0.8104 | 0 | 0 | 0 | 1 Ref      |
| MK460248 | Unassigned | Unassigned | Unassigned | 1071_3 | Clustered           | 16 VC_1071_3 | 16  | 0.2354 | 1          | 0.2354 | 0 | 0 | 0 | 0.9667 Ref |
| MK468591 | Unassigned | Unassigned | Unassigned | 225_0  | Clustered           | 32 VC_225_0  | 32  | 0.848  | 1          | 0.848  | 0 | 0 | 0 | 0.996 Ref  |
| MK473373 | Unassigned | Unassigned | Unassigned | 1030_0 | Clustered           | 3 VC_1030_0  | 3   | 0.7895 | 0.99542416 | 0.7859 | 0 | 0 | 0 | 1 Ref      |
| MK473382 | Unassigned | Unassigned | Unassigned | 647_0  | Clustered           | 11 VC_647_0  | 11  | 0.598  | 1          | 0.598  | 0 | 0 | 0 | 1 Ref      |
| MK474470 | Unassigned | Unassigned | Unassigned | 837_0  | Clustered           | 29 VC_837_0  | 29  | 0.9955 | 1          | 0.9955 | 0 | 0 | 0 | 1 Ref      |
| MK479295 | Unassigned | Unassigned | Unassigned | 540_0  | Clustered           | 15 VC_540_0  | 15  | 0.2866 | 1          | 0.2866 | 0 | 0 | 0 | 1 Ref      |
| MK482688 | Unassigned | Unassigned | Unassigned | 329_7  | Clustered           | 18 VC_329_7  | 18  | 0.0938 | 1          | 0.0938 | 0 | 0 | 0 | 0.7778 Ref |
| MK482689 | Unassigned | Unassigned | Unassigned | 329_7  | Clustered           | 18 VC_329_7  | 18  | 0.0938 | 1          | 0.0938 | 0 | 0 | 0 | 0.7778 Ref |
| MK482690 | Unassigned | Unassigned | Unassigned | 329_7  | Clustered           | 18 VC_329_7  | 18  | 0.0938 | 1          | 0.0938 | 0 | 0 | 0 | 0.7778 Ref |
| MK483107 | Unassigned | Unassigned | Unassigned | 530_0  | Clustered           | 9 VC_530_0   | 9   | 0.8027 | 1          | 0.8027 | 0 | 0 | 0 | 1 Ref      |
| MK494087 | Unassigned | Unassigned | Unassigned | 215_1  | Clustered           | 19 VC_215_1  | 19  | 0.4188 | 1          | 0.4188 | 0 | 0 | 0 | 1 Ref      |
| MK494088 | Unassigned | Unassigned | Unassigned | 517_1  | Clustered           | 108 VC_517_1 | 108 | 0.8483 | 1          | 0.8483 | 0 | 0 | 0 | 0.9955 Ref |
| MK494089 | Unassigned | Unassigned | Unassigned | 1046_0 | Clustered           | 7 VC_1046_0  | 7   | 0.9413 | 1          | 0.9413 | 0 | 0 | 0 | 1 Ref      |
| MK494090 | Unassigned | Unassigned | Unassigned | 223_0  | Clustered           | 38 VC_223_0  | 38  | 0.9095 | 1          | 0.9095 | 0 | 0 | 0 | 1 Ref      |
| MK494091 | Unassigned | Unassigned | Unassigned | 940_0  | Clustered           | 34 VC_940_0  | 34  | 0.7959 | 1          | 0.7959 | 0 | 0 | 0 | 1 Ref      |
| MK494092 | Unassigned | Unassigned | Unassigned | 887_0  | Clustered           | 18 VC_887_0  | 18  | 0.3663 | 1          | 0.3663 | 0 | 0 | 0 | 1 Ref      |
| MK494093 | Unassigned | Unassigned | Unassigned | 517_1  | Clustered           | 108 VC_517_1 | 108 | 0.8483 | 1          | 0.8483 | 0 | 0 | 0 | 0.9955 Ref |
| MK494094 | Unassigned | Unassigned | Unassigned | 517_1  | Clustered           | 108 VC_517_1 | 108 | 0.8483 | 1          | 0.8483 | 0 | 0 | 0 | 0.9955 Ref |
| MK494095 | Unassigned | Unassigned | Unassigned | 810_0  | Clustered           | 18 VC_810_0  | 18  | 0.9121 | 1          | 0.9121 | 0 | 0 | 0 | 1 Ref      |
| MK494096 | Unassigned | Unassigned | Unassigned | 514_0  | Clustered           | 75 VC_514_0  | 75  | 0.9402 | 1          | 0.9402 | 0 | 0 | 0 | 1 Ref      |
| MK494097 | Unassigned | Unassigned | Unassigned | 517_1  | Clustered           | 108 VC_517_1 | 108 | 0.8483 | 1          | 0.8483 | 0 | 0 | 0 | 0.9955 Ref |
| MK494098 | Unassigned | Unassigned | Unassigned | 869_0  | Clustered           | 9 VC_869_0   | 9   | 0.2624 | 1          | 0.2624 | 0 | 0 | 0 | 1 Ref      |
| MK494099 | Unassigned | Unassigned | Unassigned | 686_0  | Clustered           | 2 VC_686_0   | 2   | 0.2147 | 0.9539194  | 0.2048 | 0 | 0 | 0 | 1 Ref      |
| MK494100 | Unassigned | Unassigned | Unassigned | 887_0  | Clustered           | 18 VC_887_0  | 18  | 0.3663 | 1          | 0.3663 | 0 | 0 | 0 | 1 Ref      |
| MK494101 | Unassigned | Unassigned | Unassigned | 517_1  | Clustered           | 108 VC_517_1 | 108 | 0.8483 | 1          | 0.8483 | 0 | 0 | 0 | 0.9955 Ref |
| MK494102 | Unassigned | Unassigned | Unassigned | 565_0  | Clustered           | 20 VC_565_0  | 20  | 0.8398 | 1          | 0.8398 | 0 | 0 | 0 | 1 Ref      |
| MK494103 | Unassigned | Unassigned | Unassigned | 950_0  | Clustered           | 38 VC_950_0  | 38  | 0.9443 | 1          | 0.9443 | 0 | 0 | 0 | 1 Ref      |
| MK494104 | Unassigned | Unassigned | Unassigned | 371_16 | Clustered           | 42 VC_371_16 | 42  | 0.1341 | 1          | 0.1341 | 0 | 0 | 0 | 0.7282 Ref |
| MK494105 | Unassigned | Unassigned | Unassigned | 762_0  | Clustered           | 9 VC_762_0   | 9   | 0.0885 | 1          | 0.0885 | 0 | 0 | 0 | 1 Ref      |
| MK494106 | Unassigned | Unassigned | Unassigned | 866_1  | Clustered           | 20 VC_866_1  | 20  | 0.4814 | 1          | 0.4814 | 0 | 0 | 0 | 1 Ref      |
| MK494107 | Unassigned | Unassigned | Unassigned | 1074_0 | Clustered           | 19 VC_1074_0 | 19  | 0.9198 | 1          | 0.9198 | 0 | 0 | 0 | 1 Ref      |
| MK494108 | Unassigned | Unassigned | Unassigned | 225_0  | Clustered           | 32 VC_225_0  | 32  | 0.848  | 1          | 0.848  | 0 | 0 | 0 | 0.996 Ref  |
| MK494109 | Unassigned | Unassigned | Unassigned | 866_1  | Clustered           | 20 VC_866_1  | 20  | 0.4814 | 1          | 0.4814 | 0 | 0 | 0 | 1 Ref      |
| MK494110 | Unassigned | Unassigned | Unassigned | 520_45 | Clustered           | 7 VC_520_45  | 7   | 0.0635 | 1          | 0.0635 | 0 | 0 | 0 | 0.8095 Ref |
| MK494111 | Unassigned | Unassigned | Unassigned | 950_0  | Clustered           | 38 VC_950_0  | 38  | 0.9443 | 1          | 0.9443 | 0 | 0 | 0 | 1 Ref      |
| MK494112 | Unassigned | Unassigned | Unassigned | 1071_3 | Clustered           | 16 VC_1071_3 | 16  | 0.2354 | 1          | 0.2354 | 0 | 0 | 0 | 0.9667 Ref |
| MK494113 | Unassigned | Unassigned | Unassigned | 222_0  | Clustered           | 5 VC_222_0   | 5   | 0.0565 | 0.99999997 | 0.0565 | 0 | 0 | 0 | 1 Ref      |
| MK494114 | Unassigned | Unassigned | Unassigned | 507_0  | Clustered           | 8 VC_507_0   | 8   | 0.4466 | 1          | 0.4466 | 0 | 0 | 0 | 1 Ref      |
| MK494115 | Unassigned | Unassigned | Unassigned | 517_0  | Clustered           | 18 VC_517_0  | 18  | 0.1599 | 1          | 0.1599 | 0 | 0 | 0 | 1 Ref      |
| MK494116 | Unassigned | Unassigned | Unassigned | 325_30 | Clustered           | 4 VC_325_30  | 4   | 0.0144 | 0.99998616 | 0.0144 | 0 | 0 | 0 | 0.8333 Ref |
| MK494117 | Unassigned | Unassigned | Unassigned | 517_0  | Clustered           | 18 VC_517_0  | 18  | 0.1599 | 1          | 0.1599 | 0 | 0 | 0 | 1 Ref      |
| MK494118 | Unassigned | Unassigned | Unassigned | 520_72 | Clustered/Singleton | 1 VC_520_72  | 1   | 0      | 1          | 0      | 0 | 0 | 0 | 1 Ref      |
| MK494119 | Unassigned | Unassigned | Unassigned | 237_0  | Clustered           | 4 VC_237_0   | 4   | 0.0429 | 0.99998759 | 0.0429 | 0 | 0 | 0 | 1 Ref      |
| MK494121 | Unassigned | Unassigned | Unassigned | 866_1  | Clustered           | 20 VC_866_1  | 20  | 0.4814 | 1          | 0.4814 | 0 | 0 | 0 | 1 Ref      |
| MK494122 | Unassigned | Unassigned | Unassigned | 519_0  | Clustered           | 39 VC_519_0  | 39  | 0.8156 | 1          | 0.8156 | 0 | 0 | 0 | 1 Ref      |
| MK494123 | Unassigned | Unassigned | Unassigned | 939_0  | Clustered           | 15 VC_939_0  | 15  | 1      | 0          | 0      | 0 | 0 | 0 | 1 Ref      |
| MK494124 | Unassigned | Unassigned | Unassigned | 515_0  | Clustered           | 16 VC_515_0  | 16  | 0.3793 | 1          | 0.3793 | 0 | 0 | 0 | 1 Ref      |
| MK494125 | Unassigned | Unassigned | Unassigned | 517_1  | Clustered           | 108 VC_517_1 | 108 | 0.8483 | 1          | 0.8483 | 0 | 0 | 0 | 0.9955 Ref |
| MK494126 | Unassigned | Unassigned | Unassigned | 517_1  | Clustered           | 108 VC_517_1 | 108 | 0.8483 | 1          | 0.8483 | 0 | 0 | 0 | 0.9955 Ref |
| MK494127 | Unassigned | Unassigned | Unassigned | 513_0  | Clustered           | 32 VC_513_0  | 32  | 0.6881 | 1          | 0.6881 | 0 | 0 | 0 | 1 Ref      |
| MK494128 | Unassigned | Unassigned | Unassigned | 514_0  | Clustered           | 75 VC_514_0  | 75  | 0.9402 | 1          | 0.9402 | 0 | 0 | 0 | 1 Ref      |
| MK494129 | Unassigned | Unassigned | Unassigned | 517_0  | Clustered           | 18 VC_517_0  | 18  | 0.1599 | 1          | 0.1599 | 0 | 0 | 0 | 1 Ref      |
| MK494130 | Unassigned | Unassigned | Unassigned | 221_0  | Clustered           | 22 VC_221_0  | 22  | 0.7447 | 1          | 0.7447 | 0 | 0 | 0 | 1 Ref      |
| MK494131 | Unassigned | Unassigned | Unassigned | 507_0  | Clustered           | 8 VC_507_0   | 8   | 0.4466 | 1          | 0.4466 | 0 | 0 | 0 | 1 Ref      |
| MK494132 | Unassigned | Unassigned | Unassigned | 507_0  | Clustered           | 8 VC_507_0   | 8   | 0.4466 | 1          | 0.4466 | 0 | 0 | 0 | 1 Ref      |



|          |            |            |            |        |           |              |    |        |            |        |   |   |   |       |
|----------|------------|------------|------------|--------|-----------|--------------|----|--------|------------|--------|---|---|---|-------|
| MK496679 | Unassigned | Unassigned | Unassigned | 1371_0 | Clustered | 5 VC_1371_0  | 5  | 0.7004 | 0.52188382 | 0.3656 | 0 | 0 | 0 | 1 Ref |
| MK496680 | Unassigned | Unassigned | Unassigned | 1371_0 | Clustered | 5 VC_1371_0  | 5  | 0.7004 | 0.52188382 | 0.3656 | 0 | 0 | 0 | 1 Ref |
| MK496681 | Unassigned | Unassigned | Unassigned | 1373_0 | Clustered | 2 VC_1373_0  | 2  | 0.6485 | 0.86822376 | 0.563  | 0 | 0 | 0 | 1 Ref |
| MK496682 | Unassigned | Unassigned | Unassigned | 1367_0 | Clustered | 2 VC_1367_0  | 2  | 1      | 1          | 1      | 0 | 0 | 0 | 1 Ref |
| MK496683 | Unassigned | Unassigned | Unassigned | 1374_0 | Clustered | 2 VC_1374_0  | 2  | 1      | 1          | 1      | 0 | 0 | 0 | 1 Ref |
| MK496685 | Unassigned | Unassigned | Unassigned | 1264_0 | Clustered | 6 VC_1264_0  | 6  | 0.7062 | 0.92055725 | 0.6501 | 0 | 0 | 0 | 1 Ref |
| MK496686 | Unassigned | Unassigned | Unassigned | 1375_0 | Clustered | 2 VC_1375_0  | 2  | 1      | 1          | 1      | 0 | 0 | 0 | 1 Ref |
| MK496688 | Unassigned | Unassigned | Unassigned | 1376_0 | Clustered | 3 VC_1376_0  | 3  | 1      | 1          | 1      | 0 | 0 | 0 | 1 Ref |
| MK496689 | Unassigned | Unassigned | Unassigned | 1377_0 | Clustered | 3 VC_1377_0  | 3  | 1      | 0          | 0      | 0 | 0 | 0 | 1 Ref |
| MK496690 | Unassigned | Unassigned | Unassigned | 1376_0 | Clustered | 3 VC_1376_0  | 3  | 1      | 1          | 1      | 0 | 0 | 0 | 1 Ref |
| MK496692 | Unassigned | Unassigned | Unassigned | 1326_0 | Clustered | 2 VC_1326_0  | 2  | 1      | 1          | 1      | 0 | 0 | 0 | 1 Ref |
| MK496693 | Unassigned | Unassigned | Unassigned | 1197_0 | Clustered | 15 VC_1197_0 | 15 | 0.8991 | 0.76608394 | 0.6888 | 0 | 0 | 0 | 1 Ref |
| MK496694 | Unassigned | Unassigned | Unassigned | 1243_0 | Clustered | 52 VC_1243_0 | 52 | 0.9126 | 0.92708311 | 0.8461 | 0 | 0 | 0 | 1 Ref |
| MK496696 | Unassigned | Unassigned | Unassigned | 1297_0 | Clustered | 7 VC_1297_0  | 7  | 1      | 1          | 1      | 0 | 0 | 0 | 1 Ref |
| MK496697 | Unassigned | Unassigned | Unassigned | 1378_0 | Clustered | 2 VC_1378_0  | 2  | 1      | 1          | 1      | 0 | 0 | 0 | 1 Ref |
| MK496698 | Unassigned | Unassigned | Unassigned | 1372_0 | Clustered | 2 VC_1372_0  | 2  | 0.1774 | 0.73645537 | 0.1307 | 0 | 0 | 0 | 1 Ref |
| MK496699 | Unassigned | Unassigned | Unassigned | 1379_0 | Clustered | 2 VC_1379_0  | 2  | 1      | 1          | 1      | 0 | 0 | 0 | 1 Ref |
| MK496700 | Unassigned | Unassigned | Unassigned | 1377_0 | Clustered | 3 VC_1377_0  | 3  | 1      | 0          | 0      | 0 | 0 | 0 | 1 Ref |
| MK496701 | Unassigned | Unassigned | Unassigned | 1380_0 | Clustered | 2 VC_1380_0  | 2  | 1      | 1          | 1      | 0 | 0 | 0 | 1 Ref |
| MK496702 | Unassigned | Unassigned | Unassigned | 1380_0 | Clustered | 2 VC_1380_0  | 2  | 1      | 1          | 1      | 0 | 0 | 0 | 1 Ref |
| MK496704 | Unassigned | Unassigned | Unassigned | 1296_0 | Clustered | 4 VC_1296_0  | 4  | 0.8684 | 0.91151676 | 0.7915 | 0 | 0 | 0 | 1 Ref |
| MK496710 | Unassigned | Unassigned | Unassigned | 1381_0 | Clustered | 3 VC_1381_0  | 3  | 1      | 1          | 1      | 0 | 0 | 0 | 1 Ref |
| MK496711 | Unassigned | Unassigned | Unassigned | 1297_0 | Clustered | 7 VC_1297_0  | 7  | 1      | 1          | 1      | 0 | 0 | 0 | 1 Ref |
| MK496712 | Unassigned | Unassigned | Unassigned | 1382_0 | Clustered | 2 VC_1382_0  | 2  | 1      | 1          | 1      | 0 | 0 | 0 | 1 Ref |
| MK496714 | Unassigned | Unassigned | Unassigned | 1134_0 | Clustered | 5 VC_1134_0  | 5  | 0.129  | 0.7637089  | 0.0985 | 0 | 0 | 0 | 1 Ref |
| MK496716 | Unassigned | Unassigned | Unassigned | 1383_0 | Clustered | 2 VC_1383_0  | 2  | 0.6415 | 0.72985431 | 0.4682 | 0 | 0 | 0 | 1 Ref |
| MK496717 | Unassigned | Unassigned | Unassigned | 1384_0 | Clustered | 2 VC_1384_0  | 2  | 1      | 1          | 1      | 0 | 0 | 0 | 1 Ref |
| MK496719 | Unassigned | Unassigned | Unassigned | 1112_0 | Clustered | 2 VC_1112_0  | 2  | 0.2212 | 0.72377355 | 0.1601 | 0 | 0 | 0 | 1 Ref |
| MK496720 | Unassigned | Unassigned | Unassigned | 1385_0 | Clustered | 2 VC_1385_0  | 2  | 1      | 1          | 1      | 0 | 0 | 0 | 1 Ref |
| MK496721 | Unassigned | Unassigned | Unassigned | 1386_0 | Clustered | 3 VC_1386_0  | 3  | 1      | 0          | 0      | 0 | 0 | 0 | 1 Ref |
| MK496723 | Unassigned | Unassigned | Unassigned | 1054_0 | Clustered | 12 VC_1054_0 | 12 | 0.2863 | 0.99746644 | 0.2855 | 0 | 0 | 0 | 1 Ref |
| MK496725 | Unassigned | Unassigned | Unassigned | 1387_0 | Clustered | 3 VC_1387_0  | 3  | 0.7373 | 0.96173875 | 0.709  | 0 | 0 | 0 | 1 Ref |
| MK496729 | Unassigned | Unassigned | Unassigned | 1296_0 | Clustered | 4 VC_1296_0  | 4  | 0.8684 | 0.91151676 | 0.7915 | 0 | 0 | 0 | 1 Ref |
| MK496732 | Unassigned | Unassigned | Unassigned | 1292_0 | Clustered | 3 VC_1292_0  | 3  | 1      | 1          | 1      | 0 | 0 | 0 | 1 Ref |
| MK496738 | Unassigned | Unassigned | Unassigned | 1112_0 | Clustered | 2 VC_1112_0  | 2  | 0.2212 | 0.72377355 | 0.1601 | 0 | 0 | 0 | 1 Ref |
| MK496743 | Unassigned | Unassigned | Unassigned | 1105_0 | Clustered | 3 VC_1105_0  | 3  | 0.0755 | 0.99466875 | 0.0751 | 0 | 0 | 0 | 1 Ref |
| MK496744 | Unassigned | Unassigned | Unassigned | 1105_0 | Clustered | 3 VC_1105_0  | 3  | 0.0755 | 0.99466875 | 0.0751 | 0 | 0 | 0 | 1 Ref |
| MK496745 | Unassigned | Unassigned | Unassigned | 1147_0 | Clustered | 3 VC_1147_0  | 3  | 0.4334 | 0.65335909 | 0.2832 | 0 | 0 | 0 | 1 Ref |
| MK496746 | Unassigned | Unassigned | Unassigned | 1387_0 | Clustered | 3 VC_1387_0  | 3  | 0.7373 | 0.96173875 | 0.709  | 0 | 0 | 0 | 1 Ref |
| MK496748 | Unassigned | Unassigned | Unassigned | 1388_0 | Clustered | 2 VC_1388_0  | 2  | 1      | 1          | 1      | 0 | 0 | 0 | 1 Ref |
| MK496750 | Unassigned | Unassigned | Unassigned | 1389_0 | Clustered | 2 VC_1389_0  | 2  | 0.6339 | 0.72985431 | 0.4627 | 0 | 0 | 0 | 1 Ref |
| MK496753 | Unassigned | Unassigned | Unassigned | 1390_0 | Clustered | 2 VC_1390_0  | 2  | 1      | 1          | 1      | 0 | 0 | 0 | 1 Ref |
| MK496754 | Unassigned | Unassigned | Unassigned | 1119_0 | Clustered | 20 VC_1119_0 | 20 | 0.6751 | 0.99997892 | 0.6751 | 0 | 0 | 0 | 1 Ref |
| MK496756 | Unassigned | Unassigned | Unassigned | 1391_0 | Clustered | 2 VC_1391_0  | 2  | 1      | 1          | 1      | 0 | 0 | 0 | 1 Ref |
| MK496757 | Unassigned | Unassigned | Unassigned | 1303_0 | Clustered | 6 VC_1303_0  | 6  | 1      | 1          | 1      | 0 | 0 | 0 | 1 Ref |
| MK496758 | Unassigned | Unassigned | Unassigned | 1392_0 | Clustered | 2 VC_1392_0  | 2  | 1      | 1          | 1      | 0 | 0 | 0 | 1 Ref |
| MK496760 | Unassigned | Unassigned | Unassigned | 1373_0 | Clustered | 2 VC_1373_0  | 2  | 0.6485 | 0.86822376 | 0.563  | 0 | 0 | 0 | 1 Ref |
| MK496761 | Unassigned | Unassigned | Unassigned | 1374_0 | Clustered | 2 VC_1374_0  | 2  | 1      | 1          | 1      | 0 | 0 | 0 | 1 Ref |
| MK496764 | Unassigned | Unassigned | Unassigned | 1375_0 | Clustered | 2 VC_1375_0  | 2  | 1      | 1          | 1      | 0 | 0 | 0 | 1 Ref |
| MK496765 | Unassigned | Unassigned | Unassigned | 1294_0 | Clustered | 6 VC_1294_0  | 6  | 0.6626 | 0.99999272 | 0.6626 | 0 | 0 | 0 | 1 Ref |
| MK496766 | Unassigned | Unassigned | Unassigned | 1376_0 | Clustered | 3 VC_1376_0  | 3  | 1      | 1          | 1      | 0 | 0 | 0 | 1 Ref |
| MK496767 | Unassigned | Unassigned | Unassigned | 1381_0 | Clustered | 3 VC_1381_0  | 3  | 1      | 1          | 1      | 0 | 0 | 0 | 1 Ref |
| MK496768 | Unassigned | Unassigned | Unassigned | 1381_0 | Clustered | 3 VC_1381_0  | 3  | 1      | 1          | 1      | 0 | 0 | 0 | 1 Ref |
| MK496770 | Unassigned | Unassigned | Unassigned | 1393_0 | Clustered | 2 VC_1393_0  | 2  | 1      | 1          | 1      | 0 | 0 | 0 | 1 Ref |
| MK496771 | Unassigned | Unassigned | Unassigned | 1393_0 | Clustered | 2 VC_1393_0  | 2  | 1      | 1          | 1      | 0 | 0 | 0 | 1 Ref |
| MK496772 | Unassigned | Unassigned | Unassigned | 1372_0 | Clustered | 2 VC_1372_0  | 2  | 0.1774 | 0.73645537 | 0.1307 | 0 | 0 | 0 | 1 Ref |
| MK496774 | Unassigned | Unassigned | Unassigned | 1197_0 | Clustered | 15 VC_1197_0 | 15 | 0.8991 | 0.76608394 | 0.6888 | 0 | 0 | 0 | 1 Ref |
| MK496775 | Unassigned | Unassigned | Unassigned | 1243_0 | Clustered | 52 VC_1243_0 | 52 | 0.9126 | 0.92708311 | 0.8461 | 0 | 0 | 0 | 1 Ref |
| MK496776 | Unassigned | Unassigned | Unassigned | 1371_0 | Clustered | 5 VC_1371_0  | 5  | 0.7004 | 0.52188382 | 0.3656 | 0 | 0 | 0 | 1 Ref |
| MK496779 | Unassigned | Unassigned | Unassigned | 1134_0 | Clustered | 5 VC_1134_0  | 5  | 0.129  | 0.7637089  | 0.0985 | 0 | 0 | 0 | 1 Ref |
| MK496780 | Unassigned | Unassigned | Unassigned | 1378_0 | Clustered | 2 VC_1378_0  | 2  | 1      | 1          | 1      | 0 | 0 | 0 | 1 Ref |
| MK496781 | Unassigned | Unassigned | Unassigned | 1386_0 | Clustered | 3 VC_1386_0  | 3  | 1      | 0          | 0      | 0 | 0 | 0 | 1 Ref |
| MK496782 | Unassigned | Unassigned | Unassigned | 1296_0 | Clustered | 4 VC_1296_0  | 4  | 0.8684 | 0.91151676 | 0.7915 | 0 | 0 | 0 | 1 Ref |
| MK496784 | Unassigned | Unassigned | Unassigned | 1377_0 | Clustered | 3 VC_1377_0  | 3  | 1      | 0          | 0      | 0 | 0 | 0 | 1 Ref |
| MK496785 | Unassigned | Unassigned | Unassigned | 1379_0 | Clustered | 2 VC_1379_0  | 2  | 1      | 1          | 1      | 0 | 0 | 0 | 1 Ref |
| MK496786 | Unassigned | Unassigned | Unassigned | 1386_0 | Clustered | 3 VC_1386_0  | 3  | 1      | 0          | 0      | 0 | 0 | 0 | 1 Ref |
| MK496787 | Unassigned | Unassigned | Unassigned | 1382_0 | Clustered | 2 VC_1382_0  | 2  | 1      | 1          | 1      | 0 | 0 | 0 | 1 Ref |
| MK496790 | Unassigned | Unassigned | Unassigned | 1383_0 | Clustered | 2 VC_1383_0  | 2  | 0.6415 | 0.72985431 | 0.4682 | 0 | 0 | 0 | 1 Ref |
| MK496792 | Unassigned | Unassigned | Unassigned | 1134_0 | Clustered | 5 VC_1134_0  | 5  | 0.129  | 0.7637089  | 0.0985 | 0 | 0 | 0 | 1 Ref |
| MK496796 | Unassigned | Unassigned | Unassigned | 1385_0 | Clustered | 2 VC_1385_0  | 2  | 1      | 1          | 1      | 0 | 0 | 0 | 1 Ref |
| MK496804 | Unassigned | Unassigned | Unassigned | 1384_0 | Clustered | 2 VC_1384_0  | 2  | 1      | 1          | 1      | 0 | 0 | 0 | 1 Ref |
| MK496805 | Unassigned | Unassigned | Unassigned | 1119_0 | Clustered | 20 VC_1119_0 | 20 | 0.6751 | 0.99997892 | 0.6751 | 0 | 0 | 0 | 1 Ref |
| MK496808 | Unassigned | Unassigned | Unassigned | 1392_0 | Clustered | 2 VC_1392_0  | 2  | 1      | 1          | 1      | 0 | 0 | 0 | 1 Ref |
| MK496811 | Unassigned | Unassigned | Unassigned | 1387_0 | Clustered | 3 VC_1387_0  | 3  | 0.7373 | 0.96173875 | 0.709  | 0 | 0 | 0 | 1 Ref |
| MK496812 | Unassigned | Unassigned | Unassigned | 1119_0 | Clustered | 20 VC_1119_0 | 20 | 0.6751 | 0.99997892 | 0.6751 | 0 | 0 | 0 | 1 Ref |
| MK496813 | Unassigned | Unassigned | Unassigned | 1119_0 | Clustered | 20 VC_1119_0 | 20 | 0.6751 | 0.99997892 | 0.6751 | 0 | 0 | 0 | 1 Ref |
| MK496815 | Unassigned | Unassigned | Unassigned | 1388_0 | Clustered | 2 VC_1388_0  | 2  | 1      | 1          | 1      | 0 | 0 | 0 | 1 Ref |
| MK496816 | Unassigned | Unassigned | Unassigned | 1389_0 | Clustered | 2 VC_1389_0  | 2  | 0.6339 | 0.72985431 | 0.4627 | 0 | 0 | 0 | 1 Ref |
| MK496818 | Unassigned | Unassigned | Unassigned | 1390_0 | Clustered | 2 VC_1390_0  | 2  | 1      | 1          | 1      | 0 | 0 | 0 | 1 Ref |
| MK496820 | Unassigned | Unassigned | Unassigned | 1394_0 | Clustered | 2 VC_1394_0  | 2  | 1      | 1          | 1      | 0 | 0 | 0 | 1 Ref |
| MK496824 | Unassigned | Unassigned | Unassigned | 1391_0 | Clustered | 2 VC_1391_0  | 2  | 1      | 1          | 1      | 0 | 0 | 0 | 1 Ref |



|          |            |            |            |        |                     |              |    |        |            |        |   |   |   |            |
|----------|------------|------------|------------|--------|---------------------|--------------|----|--------|------------|--------|---|---|---|------------|
| MK496825 | Unassigned | Unassigned | Unassigned | 995_0  | Clustered           | 69 VC_995_0  | 69 | 0.8547 | 1          | 0.8547 | 0 | 0 | 0 | 1 Ref      |
| MK501729 | Unassigned | Unassigned | Unassigned | 1176_0 | Clustered           | 41 VC_1176_0 | 41 | 0.9558 | 1          | 0.9558 | 0 | 0 | 0 | 0.9976 Ref |
| MK501730 | Unassigned | Unassigned | Unassigned | 1176_0 | Clustered           | 41 VC_1176_0 | 41 | 0.9558 | 1          | 0.9558 | 0 | 0 | 0 | 0.9976 Ref |
| MK504442 | Unassigned | Unassigned | Unassigned | 578_0  | Clustered           | 2 VC_578_0   | 2  | 0.1712 | 0.93973606 | 0.1608 | 0 | 0 | 0 | 1 Ref      |
| MK504443 | Unassigned | Unassigned | Unassigned | 95_0   | Clustered           | 3 VC_95_0    | 3  | 0.2092 | 0.99852577 | 0.2089 | 0 | 0 | 0 | 1 Ref      |
| MK504444 | Unassigned | Unassigned | Unassigned | 526_3  | Clustered/Singleton | 1 VC_526_3   | 1  | 0      | 1          | 0      | 0 | 0 | 0 | 1 Ref      |
| MK504446 | Unassigned | Unassigned | Unassigned | 95_0   | Clustered           | 3 VC_95_0    | 3  | 0.2092 | 0.99852577 | 0.2089 | 0 | 0 | 0 | 1 Ref      |
| MK509462 | Unassigned | Unassigned | Unassigned | 131_2  | Clustered           | 7 VC_131_2   | 7  | 0.0685 | 1          | 0.0685 | 0 | 0 | 0 | 0.9048 Ref |
| MK510962 | Unassigned | Unassigned | Unassigned | 747_0  | Clustered           | 23 VC_747_0  | 23 | 0.8202 | 1          | 0.8202 | 0 | 0 | 0 | 1 Ref      |
| MK510963 | Unassigned | Unassigned | Unassigned | 747_0  | Clustered           | 23 VC_747_0  | 23 | 0.8202 | 1          | 0.8202 | 0 | 0 | 0 | 1 Ref      |
| MK510964 | Unassigned | Unassigned | Unassigned | 747_0  | Clustered           | 23 VC_747_0  | 23 | 0.8202 | 1          | 0.8202 | 0 | 0 | 0 | 1 Ref      |
| MK510965 | Unassigned | Unassigned | Unassigned | 747_0  | Clustered           | 23 VC_747_0  | 23 | 0.8202 | 1          | 0.8202 | 0 | 0 | 0 | 1 Ref      |
| MK510966 | Unassigned | Unassigned | Unassigned | 748_0  | Clustered           | 12 VC_748_0  | 12 | 0.6879 | 1          | 0.6879 | 0 | 0 | 0 | 1 Ref      |
| MK510967 | Unassigned | Unassigned | Unassigned | 748_0  | Clustered           | 12 VC_748_0  | 12 | 0.6879 | 1          | 0.6879 | 0 | 0 | 0 | 1 Ref      |
| MK510968 | Unassigned | Unassigned | Unassigned | 747_0  | Clustered           | 23 VC_747_0  | 23 | 0.8202 | 1          | 0.8202 | 0 | 0 | 0 | 1 Ref      |
| MK510969 | Unassigned | Unassigned | Unassigned | 747_0  | Clustered           | 23 VC_747_0  | 23 | 0.8202 | 1          | 0.8202 | 0 | 0 | 0 | 1 Ref      |
| MK510970 | Unassigned | Unassigned | Unassigned | 747_0  | Clustered           | 23 VC_747_0  | 23 | 0.8202 | 1          | 0.8202 | 0 | 0 | 0 | 1 Ref      |
| MK510971 | Unassigned | Unassigned | Unassigned | 747_0  | Clustered           | 23 VC_747_0  | 23 | 0.8202 | 1          | 0.8202 | 0 | 0 | 0 | 1 Ref      |
| MK510972 | Unassigned | Unassigned | Unassigned | 748_0  | Clustered           | 12 VC_748_0  | 12 | 0.6879 | 1          | 0.6879 | 0 | 0 | 0 | 1 Ref      |
| MK510973 | Unassigned | Unassigned | Unassigned | 748_0  | Clustered           | 12 VC_748_0  | 12 | 0.6879 | 1          | 0.6879 | 0 | 0 | 0 | 1 Ref      |
| MK510974 | Unassigned | Unassigned | Unassigned | 747_0  | Clustered           | 23 VC_747_0  | 23 | 0.8202 | 1          | 0.8202 | 0 | 0 | 0 | 1 Ref      |
| MK510975 | Unassigned | Unassigned | Unassigned | 747_0  | Clustered           | 23 VC_747_0  | 23 | 0.8202 | 1          | 0.8202 | 0 | 0 | 0 | 1 Ref      |
| MK510976 | Unassigned | Unassigned | Unassigned | 747_0  | Clustered           | 23 VC_747_0  | 23 | 0.8202 | 1          | 0.8202 | 0 | 0 | 0 | 1 Ref      |
| MK510977 | Unassigned | Unassigned | Unassigned | 748_0  | Clustered           | 12 VC_748_0  | 12 | 0.6879 | 1          | 0.6879 | 0 | 0 | 0 | 1 Ref      |
| MK510978 | Unassigned | Unassigned | Unassigned | 747_0  | Clustered           | 23 VC_747_0  | 23 | 0.8202 | 1          | 0.8202 | 0 | 0 | 0 | 1 Ref      |
| MK510979 | Unassigned | Unassigned | Unassigned | 748_0  | Clustered           | 12 VC_748_0  | 12 | 0.6879 | 1          | 0.6879 | 0 | 0 | 0 | 1 Ref      |
| MK510980 | Unassigned | Unassigned | Unassigned | 748_0  | Clustered           | 12 VC_748_0  | 12 | 0.6879 | 1          | 0.6879 | 0 | 0 | 0 | 1 Ref      |
| MK510981 | Unassigned | Unassigned | Unassigned | 748_0  | Clustered           | 12 VC_748_0  | 12 | 0.6879 | 1          | 0.6879 | 0 | 0 | 0 | 1 Ref      |
| MK510982 | Unassigned | Unassigned | Unassigned | 748_0  | Clustered           | 12 VC_748_0  | 12 | 0.6879 | 1          | 0.6879 | 0 | 0 | 0 | 1 Ref      |
| MK510983 | Unassigned | Unassigned | Unassigned | 748_0  | Clustered           | 12 VC_748_0  | 12 | 0.6879 | 1          | 0.6879 | 0 | 0 | 0 | 1 Ref      |
| MK510984 | Unassigned | Unassigned | Unassigned | 747_0  | Clustered           | 23 VC_747_0  | 23 | 0.8202 | 1          | 0.8202 | 0 | 0 | 0 | 1 Ref      |
| MK510985 | Unassigned | Unassigned | Unassigned | 747_0  | Clustered           | 23 VC_747_0  | 23 | 0.8202 | 1          | 0.8202 | 0 | 0 | 0 | 1 Ref      |
| MK510986 | Unassigned | Unassigned | Unassigned | 747_0  | Clustered           | 23 VC_747_0  | 23 | 0.8202 | 1          | 0.8202 | 0 | 0 | 0 | 1 Ref      |
| MK510987 | Unassigned | Unassigned | Unassigned | 747_0  | Clustered           | 23 VC_747_0  | 23 | 0.8202 | 1          | 0.8202 | 0 | 0 | 0 | 1 Ref      |
| MK510988 | Unassigned | Unassigned | Unassigned | 747_0  | Clustered           | 23 VC_747_0  | 23 | 0.8202 | 1          | 0.8202 | 0 | 0 | 0 | 1 Ref      |
| MK510989 | Unassigned | Unassigned | Unassigned | 748_0  | Clustered           | 12 VC_748_0  | 12 | 0.6879 | 1          | 0.6879 | 0 | 0 | 0 | 1 Ref      |
| MK510990 | Unassigned | Unassigned | Unassigned | 747_0  | Clustered           | 23 VC_747_0  | 23 | 0.8202 | 1          | 0.8202 | 0 | 0 | 0 | 1 Ref      |
| MK510991 | Unassigned | Unassigned | Unassigned | 748_0  | Clustered           | 12 VC_748_0  | 12 | 0.6879 | 1          | 0.6879 | 0 | 0 | 0 | 1 Ref      |
| MK510992 | Unassigned | Unassigned | Unassigned | 747_0  | Clustered           | 23 VC_747_0  | 23 | 0.8202 | 1          | 0.8202 | 0 | 0 | 0 | 1 Ref      |
| MK510993 | Unassigned | Unassigned | Unassigned | 747_0  | Clustered           | 23 VC_747_0  | 23 | 0.8202 | 1          | 0.8202 | 0 | 0 | 0 | 1 Ref      |
| MK511001 | Unassigned | Unassigned | Unassigned | 297_1  | Clustered           | 20 VC_297_1  | 20 | 0.5653 | 1          | 0.5653 | 0 | 0 | 0 | 0.7684 Ref |
| MK511002 | Unassigned | Unassigned | Unassigned | 297_1  | Clustered           | 20 VC_297_1  | 20 | 0.5653 | 1          | 0.5653 | 0 | 0 | 0 | 0.7684 Ref |
| MK511003 | Unassigned | Unassigned | Unassigned | 297_1  | Clustered           | 20 VC_297_1  | 20 | 0.5653 | 1          | 0.5653 | 0 | 0 | 0 | 0.7684 Ref |
| MK511004 | Unassigned | Unassigned | Unassigned | 297_1  | Clustered           | 20 VC_297_1  | 20 | 0.5653 | 1          | 0.5653 | 0 | 0 | 0 | 0.7684 Ref |
| MK511005 | Unassigned | Unassigned | Unassigned | 297_1  | Clustered           | 20 VC_297_1  | 20 | 0.5653 | 1          | 0.5653 | 0 | 0 | 0 | 0.7684 Ref |
| MK511006 | Unassigned | Unassigned | Unassigned | 297_1  | Clustered           | 20 VC_297_1  | 20 | 0.5653 | 1          | 0.5653 | 0 | 0 | 0 | 0.7684 Ref |
| MK511007 | Unassigned | Unassigned | Unassigned | 297_1  | Clustered           | 20 VC_297_1  | 20 | 0.5653 | 1          | 0.5653 | 0 | 0 | 0 | 0.7684 Ref |
| MK511008 | Unassigned | Unassigned | Unassigned | 297_1  | Clustered           | 20 VC_297_1  | 20 | 0.5653 | 1          | 0.5653 | 0 | 0 | 0 | 0.7684 Ref |
| MK511009 | Unassigned | Unassigned | Unassigned | 297_1  | Clustered           | 20 VC_297_1  | 20 | 0.5653 | 1          | 0.5653 | 0 | 0 | 0 | 0.7684 Ref |
| MK511010 | Unassigned | Unassigned | Unassigned | 297_1  | Clustered           | 20 VC_297_1  | 20 | 0.5653 | 1          | 0.5653 | 0 | 0 | 0 | 0.7684 Ref |
| MK511011 | Unassigned | Unassigned | Unassigned | 297_1  | Clustered           | 20 VC_297_1  | 20 | 0.5653 | 1          | 0.5653 | 0 | 0 | 0 | 0.7684 Ref |
| MK511012 | Unassigned | Unassigned | Unassigned | 297_1  | Clustered           | 20 VC_297_1  | 20 | 0.5653 | 1          | 0.5653 | 0 | 0 | 0 | 0.7684 Ref |
| MK511013 | Unassigned | Unassigned | Unassigned | 297_1  | Clustered           | 20 VC_297_1  | 20 | 0.5653 | 1          | 0.5653 | 0 | 0 | 0 | 0.7684 Ref |
| MK511014 | Unassigned | Unassigned | Unassigned | 297_1  | Clustered           | 20 VC_297_1  | 20 | 0.5653 | 1          | 0.5653 | 0 | 0 | 0 | 0.7684 Ref |
| MK511015 | Unassigned | Unassigned | Unassigned | 297_1  | Clustered           | 20 VC_297_1  | 20 | 0.5653 | 1          | 0.5653 | 0 | 0 | 0 | 0.7684 Ref |
| MK511016 | Unassigned | Unassigned | Unassigned | 297_1  | Clustered           | 20 VC_297_1  | 20 | 0.5653 | 1          | 0.5653 | 0 | 0 | 0 | 0.7684 Ref |
| MK511017 | Unassigned | Unassigned | Unassigned | 179_0  | Clustered           | 53 VC_179_0  | 53 | 0.9137 | 1          | 0.9137 | 0 | 0 | 0 | 1 Ref      |
| MK511018 | Unassigned | Unassigned | Unassigned | 179_0  | Clustered           | 53 VC_179_0  | 53 | 0.9137 | 1          | 0.9137 | 0 | 0 | 0 | 1 Ref      |
| MK511019 | Unassigned | Unassigned | Unassigned | 179_0  | Clustered           | 53 VC_179_0  | 53 | 0.9137 | 1          | 0.9137 | 0 | 0 | 0 | 1 Ref      |
| MK511020 | Unassigned | Unassigned | Unassigned | 179_0  | Clustered           | 53 VC_179_0  | 53 | 0.9137 | 1          | 0.9137 | 0 | 0 | 0 | 1 Ref      |
| MK511021 | Unassigned | Unassigned | Unassigned | 179_0  | Clustered           | 53 VC_179_0  | 53 | 0.9137 | 1          | 0.9137 | 0 | 0 | 0 | 1 Ref      |
| MK511022 | Unassigned | Unassigned | Unassigned | 179_0  | Clustered           | 53 VC_179_0  | 53 | 0.9137 | 1          | 0.9137 | 0 | 0 | 0 | 1 Ref      |
| MK511023 | Unassigned | Unassigned | Unassigned | 179_0  | Clustered           | 53 VC_179_0  | 53 | 0.9137 | 1          | 0.9137 | 0 | 0 | 0 | 1 Ref      |
| MK511024 | Unassigned | Unassigned | Unassigned | 179_0  | Clustered           | 53 VC_179_0  | 53 | 0.9137 | 1          | 0.9137 | 0 | 0 | 0 | 1 Ref      |
| MK511025 | Unassigned | Unassigned | Unassigned | 179_0  | Clustered           | 53 VC_179_0  | 53 | 0.9137 | 1          | 0.9137 | 0 | 0 | 0 | 1 Ref      |
| MK511026 | Unassigned | Unassigned | Unassigned | 179_0  | Clustered           | 53 VC_179_0  | 53 | 0.9137 | 1          | 0.9137 | 0 | 0 | 0 | 1 Ref      |
| MK511027 | Unassigned | Unassigned | Unassigned | 179_0  | Clustered           | 53 VC_179_0  | 53 | 0.9137 | 1          | 0.9137 | 0 | 0 | 0 | 1 Ref      |
| MK511028 | Unassigned | Unassigned | Unassigned | 179_0  | Clustered           | 53 VC_179_0  | 53 | 0.9137 | 1          | 0.9137 | 0 | 0 | 0 | 1 Ref      |
| MK511029 | Unassigned | Unassigned | Unassigned | 179_0  | Clustered           | 53 VC_179_0  | 53 | 0.9137 | 1          | 0.9137 | 0 | 0 | 0 | 1 Ref      |
| MK511030 | Unassigned | Unassigned | Unassigned | 179_0  | Clustered           | 53 VC_179_0  | 53 | 0.9137 | 1          | 0.9137 | 0 | 0 | 0 | 1 Ref      |
| MK511031 | Unassigned | Unassigned | Unassigned | 179_0  | Clustered           | 53 VC_179_0  | 53 | 0.9137 | 1          | 0.9137 | 0 | 0 | 0 | 1 Ref      |
| MK511032 | Unassigned | Unassigned | Unassigned | 179_0  | Clustered           | 53 VC_179_0  | 53 | 0.9137 | 1          | 0.9137 | 0 | 0 | 0 | 1 Ref      |
| MK511033 | Unassigned | Unassigned | Unassigned | 179_0  | Clustered           | 53 VC_179_0  | 53 | 0.9137 | 1          | 0.9137 | 0 | 0 | 0 | 1 Ref      |
| MK511034 | Unassigned | Unassigned | Unassigned | 179_0  | Clustered           | 53 VC_179_0  | 53 | 0.9137 | 1          | 0.9137 | 0 | 0 | 0 | 1 Ref      |
| MK511035 | Unassigned | Unassigned | Unassigned | 179_0  | Clustered           | 53 VC_179_0  | 53 | 0.9137 | 1          | 0.9137 | 0 | 0 | 0 | 1 Ref      |
| MK511036 | Unassigned | Unassigned | Unassigned | 179_0  | Clustered           | 53 VC_179_0  | 53 | 0.9137 | 1          | 0.9137 | 0 | 0 | 0 | 1 Ref      |
| MK511037 | Unassigned | Unassigned | Unassigned | 179_0  | Clustered           | 53 VC_179_0  | 53 | 0.9137 | 1          | 0.9137 | 0 | 0 | 0 | 1 Ref      |
| MK511038 | Unassigned | Unassigned | Unassigned | 179_0  | Clustered           | 53 VC_179_0  | 53 | 0.9137 | 1          | 0.9137 | 0 | 0 | 0 | 1 Ref      |
| MK511039 | Unassigned | Unassigned | Unassigned | 630_0  | Clustered           | 20 VC_630_0  | 20 | 0.8513 | 1          | 0.8513 | 0 | 0 | 0 | 1 Ref      |
| MK511040 | Unassigned | Unassigned | Unassigned | 630_0  | Clustered           | 20 VC_630_0  | 20 | 0.8513 | 1          | 0.8513 | 0 | 0 | 0 | 1 Ref      |
| MK511041 | Unassigned | Unassigned | Unassigned | 630_0  | Clustered           | 20 VC_630_0  | 20 | 0.8513 | 1          | 0.8513 | 0 | 0 | 0 | 1 Ref      |



|          |            |            |            |        |                     |              |     |        |            |        |   |   |   |            |
|----------|------------|------------|------------|--------|---------------------|--------------|-----|--------|------------|--------|---|---|---|------------|
| MKS11042 | Unassigned | Unassigned | Unassigned | 630_0  | Clustered           | 20 VC_630_0  | 20  | 0.8513 | 1          | 0.8513 | 0 | 0 | 0 | 1 Ref      |
| MKS11043 | Unassigned | Unassigned | Unassigned | 630_0  | Clustered           | 20 VC_630_0  | 20  | 0.8513 | 1          | 0.8513 | 0 | 0 | 0 | 1 Ref      |
| MKS11044 | Unassigned | Unassigned | Unassigned | 630_0  | Clustered           | 20 VC_630_0  | 20  | 0.8513 | 1          | 0.8513 | 0 | 0 | 0 | 1 Ref      |
| MKS11045 | Unassigned | Unassigned | Unassigned | 630_0  | Clustered           | 20 VC_630_0  | 20  | 0.8513 | 1          | 0.8513 | 0 | 0 | 0 | 1 Ref      |
| MKS11046 | Unassigned | Unassigned | Unassigned | 630_0  | Clustered           | 20 VC_630_0  | 20  | 0.8513 | 1          | 0.8513 | 0 | 0 | 0 | 1 Ref      |
| MKS11047 | Unassigned | Unassigned | Unassigned | 630_0  | Clustered           | 20 VC_630_0  | 20  | 0.8513 | 1          | 0.8513 | 0 | 0 | 0 | 1 Ref      |
| MKS11048 | Unassigned | Unassigned | Unassigned | 630_0  | Clustered           | 20 VC_630_0  | 20  | 0.8513 | 1          | 0.8513 | 0 | 0 | 0 | 1 Ref      |
| MKS11049 | Unassigned | Unassigned | Unassigned | 630_0  | Clustered           | 20 VC_630_0  | 20  | 0.8513 | 1          | 0.8513 | 0 | 0 | 0 | 1 Ref      |
| MKS11050 | Unassigned | Unassigned | Unassigned | 630_0  | Clustered           | 20 VC_630_0  | 20  | 0.8513 | 1          | 0.8513 | 0 | 0 | 0 | 1 Ref      |
| MKS11051 | Unassigned | Unassigned | Unassigned | 630_0  | Clustered           | 20 VC_630_0  | 20  | 0.8513 | 1          | 0.8513 | 0 | 0 | 0 | 1 Ref      |
| MKS11057 | Unassigned | Unassigned | Unassigned | 251_0  | Clustered           | 22 VC_251_0  | 22  | 0.6508 | 1          | 0.6508 | 0 | 0 | 0 | 1 Ref      |
| MKS11058 | Unassigned | Unassigned | Unassigned | 251_0  | Clustered           | 22 VC_251_0  | 22  | 0.6508 | 1          | 0.6508 | 0 | 0 | 0 | 1 Ref      |
| MKS11059 | Unassigned | Unassigned | Unassigned | 251_0  | Clustered           | 22 VC_251_0  | 22  | 0.6508 | 1          | 0.6508 | 0 | 0 | 0 | 1 Ref      |
| MKS11060 | Unassigned | Unassigned | Unassigned | 251_0  | Clustered           | 22 VC_251_0  | 22  | 0.6508 | 1          | 0.6508 | 0 | 0 | 0 | 1 Ref      |
| MKS11061 | Unassigned | Unassigned | Unassigned | 251_0  | Clustered           | 22 VC_251_0  | 22  | 0.6508 | 1          | 0.6508 | 0 | 0 | 0 | 1 Ref      |
| MKS11063 | Unassigned | Unassigned | Unassigned | 251_0  | Clustered           | 22 VC_251_0  | 22  | 0.6508 | 1          | 0.6508 | 0 | 0 | 0 | 1 Ref      |
| MKS11064 | Unassigned | Unassigned | Unassigned | 251_0  | Clustered           | 22 VC_251_0  | 22  | 0.6508 | 1          | 0.6508 | 0 | 0 | 0 | 1 Ref      |
| MKS11065 | Unassigned | Unassigned | Unassigned | 251_0  | Clustered           | 22 VC_251_0  | 22  | 0.6508 | 1          | 0.6508 | 0 | 0 | 0 | 1 Ref      |
| MKS11066 | Unassigned | Unassigned | Unassigned | 2_0    | Clustered           | 4 VC_2_0     | 4   | 0.1311 | 0.99998692 | 0.1311 | 0 | 0 | 0 | 1 Ref      |
| MKS12531 | Unassigned | Unassigned | Unassigned | 178_0  | Clustered           | 5 VC_178_0   | 5   | 0.7741 | 0.99998991 | 0.7741 | 0 | 0 | 0 | 1 Ref      |
| MKS14281 | Unassigned | Unassigned | Unassigned | 489_1  | Clustered           | 11 VC_489_1  | 11  | 0.4621 | 1          | 0.4621 | 0 | 0 | 0 | 1 Ref      |
| MKS14282 | Unassigned | Unassigned | Unassigned | 959_0  | Clustered           | 5 VC_959_0   | 5   | 0.0499 | 0.99999231 | 0.0499 | 0 | 0 | 0 | 1 Ref      |
| MKS14283 | Unassigned | Unassigned | Unassigned | 612_0  | Clustered           | 9 VC_612_0   | 9   | 0.9545 | 1          | 0.9545 | 0 | 0 | 0 | 1 Ref      |
| MKS21904 | Unassigned | Unassigned | Unassigned | 938_0  | Clustered           | 99 VC_938_0  | 99  | 0.9119 | 1          | 0.9119 | 0 | 0 | 0 | 0.9928 Ref |
| MKS21905 | Unassigned | Unassigned | Unassigned | 823_0  | Clustered           | 124 VC_823_0 | 124 | 0.9492 | 1          | 0.9492 | 0 | 0 | 0 | 1 Ref      |
| MKS21906 | Unassigned | Unassigned | Unassigned | 123_0  | Clustered           | 23 VC_123_0  | 23  | 0.817  | 1          | 0.817  | 0 | 0 | 0 | 1 Ref      |
| MKS21907 | Unassigned | Unassigned | Unassigned | 192_0  | Clustered           | 15 VC_192_0  | 15  | 0.5071 | 1          | 0.5071 | 0 | 0 | 0 | 1 Ref      |
| MKS24176 | Unassigned | Unassigned | Unassigned | 329_18 | Clustered           | 7 VC_329_18  | 7   | 0.0328 | 1          | 0.0328 | 0 | 0 | 0 | 0.8095 Ref |
| MKS24177 | Unassigned | Unassigned | Unassigned | 230_0  | Clustered           | 3 VC_230_0   | 3   | 0.0739 | 0.9934951  | 0.0734 | 0 | 0 | 0 | 0.6667 Ref |
| MKS24178 | Unassigned | Unassigned | Unassigned | 286_11 | Clustered           | 3 VC_286_11  | 3   | 0.0146 | 0.93460284 | 0.0137 | 0 | 0 | 0 | 1 Ref      |
| MKS24485 | Unassigned | Unassigned | Unassigned | 234_0  | Clustered           | 21 VC_234_0  | 21  | 0.8355 | 1          | 0.8355 | 0 | 0 | 0 | 1 Ref      |
| MKS24486 | Unassigned | Unassigned | Unassigned | 372_0  | Clustered           | 24 VC_372_0  | 24  | 0.5539 | 1          | 0.5539 | 0 | 0 | 0 | 1 Ref      |
| MKS24487 | Unassigned | Unassigned | Unassigned | 956_0  | Clustered           | 39 VC_956_0  | 39  | 1      | 1          | 1      | 0 | 0 | 0 | 1 Ref      |
| MKS24488 | Unassigned | Unassigned | Unassigned | 234_0  | Clustered           | 21 VC_234_0  | 21  | 0.8355 | 1          | 0.8355 | 0 | 0 | 0 | 1 Ref      |
| MKS24489 | Unassigned | Unassigned | Unassigned | 225_0  | Clustered           | 32 VC_225_0  | 32  | 0.848  | 1          | 0.848  | 0 | 0 | 0 | 0.996 Ref  |
| MKS24490 | Unassigned | Unassigned | Unassigned | 372_1  | Clustered           | 9 VC_372_1   | 9   | 0.194  | 1          | 0.194  | 0 | 0 | 0 | 1 Ref      |
| MKS24491 | Unassigned | Unassigned | Unassigned | 216_6  | Clustered           | 42 VC_216_6  | 42  | 0.473  | 1          | 0.473  | 0 | 0 | 0 | 0.8351 Ref |
| MKS24493 | Unassigned | Unassigned | Unassigned | 761_0  | Clustered           | 67 VC_761_0  | 67  | 0.8947 | 1          | 0.8947 | 0 | 0 | 0 | 1 Ref      |
| MKS24494 | Unassigned | Unassigned | Unassigned | 761_0  | Clustered           | 67 VC_761_0  | 67  | 0.8947 | 1          | 0.8947 | 0 | 0 | 0 | 1 Ref      |
| MKS24495 | Unassigned | Unassigned | Unassigned | 956_0  | Clustered           | 39 VC_956_0  | 39  | 1      | 1          | 1      | 0 | 0 | 0 | 1 Ref      |
| MKS24496 | Unassigned | Unassigned | Unassigned | 513_0  | Clustered           | 32 VC_513_0  | 32  | 0.6881 | 1          | 0.6881 | 0 | 0 | 0 | 1 Ref      |
| MKS24497 | Unassigned | Unassigned | Unassigned | 325_21 | Clustered           | 5 VC_325_21  | 5   | 0.0209 | 0.99999976 | 0.0209 | 0 | 0 | 0 | 0.8 Ref    |
| MKS24498 | Unassigned | Unassigned | Unassigned | 365_0  | Clustered           | 20 VC_365_0  | 20  | 0.8398 | 1          | 0.8398 | 0 | 0 | 0 | 1 Ref      |
| MKS24499 | Unassigned | Unassigned | Unassigned | 325_22 | Clustered/Singleton | 1 VC_325_22  | 1   | 0      | 1          | 0      | 0 | 0 | 0 | 1 Ref      |
| MKS24500 | Unassigned | Unassigned | Unassigned | 521_0  | Clustered           | 37 VC_521_0  | 37  | 0.912  | 1          | 0.912  | 0 | 0 | 0 | 1 Ref      |
| MKS24501 | Unassigned | Unassigned | Unassigned | 1181_0 | Clustered           | 2 VC_1181_0  | 2   | 0.0461 | 0.95126432 | 0.0439 | 0 | 0 | 0 | 1 Ref      |
| MKS24502 | Unassigned | Unassigned | Unassigned | 1344_0 | Clustered           | 78 VC_1344_0 | 78  | 0.9732 | 1          | 0.9732 | 0 | 0 | 0 | 1 Ref      |
| MKS24503 | Unassigned | Unassigned | Unassigned | 520_87 | Clustered/Singleton | 1 VC_520_87  | 1   | 0      | 1          | 0      | 0 | 0 | 0 | 1 Ref      |
| MKS24504 | Unassigned | Unassigned | Unassigned | 546_4  | Clustered           | 16 VC_546_4  | 16  | 0.2517 | 0.9999998  | 0.2517 | 0 | 0 | 0 | 0.9417 Ref |
| MKS24505 | Unassigned | Unassigned | Unassigned | 1184_0 | Clustered           | 5 VC_1184_0  | 5   | 0.6591 | 0.99999982 | 0.6591 | 0 | 0 | 0 | 1 Ref      |
| MKS24506 | Unassigned | Unassigned | Unassigned | 325_35 | Clustered           | 17 VC_325_35 | 17  | 0.0732 | 1          | 0.0732 | 0 | 0 | 0 | 0.7721 Ref |
| MKS24507 | Unassigned | Unassigned | Unassigned | 221_0  | Clustered           | 22 VC_221_0  | 22  | 0.7447 | 1          | 0.7447 | 0 | 0 | 0 | 1 Ref      |
| MKS24508 | Unassigned | Unassigned | Unassigned | 519_0  | Clustered           | 39 VC_519_0  | 39  | 0.8156 | 1          | 0.8156 | 0 | 0 | 0 | 1 Ref      |
| MKS24509 | Unassigned | Unassigned | Unassigned | 521_0  | Clustered           | 37 VC_521_0  | 37  | 0.912  | 1          | 0.912  | 0 | 0 | 0 | 1 Ref      |
| MKS24510 | Unassigned | Unassigned | Unassigned | 1352_0 | Clustered           | 31 VC_1352_0 | 31  | 0.849  | 1          | 0.849  | 0 | 0 | 0 | 1 Ref      |
| MKS24511 | Unassigned | Unassigned | Unassigned | 221_0  | Clustered           | 22 VC_221_0  | 22  | 0.7447 | 1          | 0.7447 | 0 | 0 | 0 | 1 Ref      |
| MKS24512 | Unassigned | Unassigned | Unassigned | 371_1  | Clustered           | 11 VC_371_1  | 11  | 0.0379 | 1          | 0.0379 | 0 | 0 | 0 | 0.8545 Ref |
| MKS24513 | Unassigned | Unassigned | Unassigned | 221_0  | Clustered           | 22 VC_221_0  | 22  | 0.7447 | 1          | 0.7447 | 0 | 0 | 0 | 1 Ref      |
| MKS24514 | Unassigned | Unassigned | Unassigned | 221_0  | Clustered           | 22 VC_221_0  | 22  | 0.7447 | 1          | 0.7447 | 0 | 0 | 0 | 1 Ref      |
| MKS24515 | Unassigned | Unassigned | Unassigned | 521_0  | Clustered           | 37 VC_521_0  | 37  | 0.912  | 1          | 0.912  | 0 | 0 | 0 | 1 Ref      |
| MKS24516 | Unassigned | Unassigned | Unassigned | 546_9  | Clustered/Singleton | 1 VC_546_9   | 1   | 0      | 1          | 0      | 0 | 0 | 0 | 1 Ref      |
| MKS24517 | Unassigned | Unassigned | Unassigned | 520_38 | Clustered           | 6 VC_520_38  | 6   | 0.0519 | 1          | 0.0519 | 0 | 0 | 0 | 0.8667 Ref |
| MKS24518 | Unassigned | Unassigned | Unassigned | 521_0  | Clustered           | 37 VC_521_0  | 37  | 0.912  | 1          | 0.912  | 0 | 0 | 0 | 1 Ref      |
| MKS24519 | Unassigned | Unassigned | Unassigned | 221_0  | Clustered           | 22 VC_221_0  | 22  | 0.7447 | 1          | 0.7447 | 0 | 0 | 0 | 1 Ref      |
| MKS24520 | Unassigned | Unassigned | Unassigned | 521_0  | Clustered           | 37 VC_521_0  | 37  | 0.912  | 1          | 0.912  | 0 | 0 | 0 | 1 Ref      |
| MKS24521 | Unassigned | Unassigned | Unassigned | 546_4  | Clustered           | 16 VC_546_4  | 16  | 0.2517 | 0.9999998  | 0.2517 | 0 | 0 | 0 | 0.9417 Ref |
| MKS24522 | Unassigned | Unassigned | Unassigned | 521_0  | Clustered           | 37 VC_521_0  | 37  | 0.912  | 1          | 0.912  | 0 | 0 | 0 | 1 Ref      |
| MKS24523 | Unassigned | Unassigned | Unassigned | 325_16 | Clustered           | 2 VC_325_16  | 2   | 0.0095 | 0.95751393 | 0.0091 | 0 | 0 | 0 | 1 Ref      |
| MKS24524 | Unassigned | Unassigned | Unassigned | 981_1  | Clustered           | 26 VC_981_1  | 26  | 0.7009 | 1          | 0.7009 | 0 | 0 | 0 | 1 Ref      |
| MKS24525 | Unassigned | Unassigned | Unassigned | 325_45 | Clustered/Singleton | 1 VC_325_45  | 1   | 0      | 1          | 0      | 0 | 0 | 0 | 1 Ref      |
| MKS24526 | Unassigned | Unassigned | Unassigned | 371_1  | Clustered           | 11 VC_371_1  | 11  | 0.0379 | 1          | 0.0379 | 0 | 0 | 0 | 0.8545 Ref |
| MKS24527 | Unassigned | Unassigned | Unassigned | 546_4  | Clustered           | 16 VC_546_4  | 16  | 0.2517 | 0.9999998  | 0.2517 | 0 | 0 | 0 | 0.9417 Ref |
| MKS24528 | Unassigned | Unassigned | Unassigned | 521_0  | Clustered           | 37 VC_521_0  | 37  | 0.912  | 1          | 0.912  | 0 | 0 | 0 | 1 Ref      |
| MKS24529 | Unassigned | Unassigned | Unassigned | 546_4  | Clustered           | 16 VC_546_4  | 16  | 0.2517 | 0.9999998  | 0.2517 | 0 | 0 | 0 | 0.9417 Ref |
| MKS24530 | Unassigned | Unassigned | Unassigned | 222_0  | Clustered           | 5 VC_222_0   | 5   | 0.0565 | 0.99999997 | 0.0565 | 0 | 0 | 0 | 1 Ref      |
| MKS24531 | Unassigned | Unassigned | Unassigned | 325_35 | Clustered           | 17 VC_325_35 | 17  | 0.0732 | 1          | 0.0732 | 0 | 0 | 0 | 0.7721 Ref |
| MKS42015 | Unassigned | Unassigned | Unassigned | 638_0  | Clustered           | 45 VC_638_0  | 45  | 0.7741 | 1          | 0.7741 | 0 | 0 | 0 | 1 Ref      |
| MKS42821 | Unassigned | Unassigned | Unassigned | 392_0  | Clustered           | 126 VC_392_0 | 126 | 0.9621 | 1          | 0.9621 | 0 | 0 | 0 | 1 Ref      |
| MKS52140 | Unassigned | Unassigned | Unassigned | 66_0   | Clustered           | 2 VC_66_0    | 2   | 0.1995 | 0.95487418 | 0.1905 | 0 | 0 | 0 | 1 Ref      |
| MKS52141 | Unassigned | Unassigned | Unassigned | 66_0   | Clustered           | 2 VC_66_0    | 2   | 0.1995 | 0.95487418 | 0.1905 | 0 | 0 | 0 | 1 Ref      |
| MKS52327 | Unassigned | Unassigned | Unassigned | 344_3  | Clustered/Singleton | 1 VC_344_3   | 1   | 0      | 1          | 0      | 0 | 0 | 0 | 1 Ref      |



|          |            |            |            |        |           |               |     |        |            |        |   |   |   |            |
|----------|------------|------------|------------|--------|-----------|---------------|-----|--------|------------|--------|---|---|---|------------|
| MK559427 | Unassigned | Unassigned | Unassigned | 565_0  | Clustered | 20 VC_565_0   | 20  | 0.8398 | 1          | 0.8398 | 0 | 0 | 0 | 1 Ref      |
| MK559428 | Unassigned | Unassigned | Unassigned | 225_0  | Clustered | 32 VC_225_0   | 32  | 0.848  | 1          | 0.848  | 0 | 0 | 0 | 0.996 Ref  |
| MK559429 | Unassigned | Unassigned | Unassigned | 551_6  | Clustered | 22 VC_551_6   | 22  | 0.1214 | 1          | 0.1214 | 0 | 0 | 0 | 0.8095 Ref |
| MK559459 | Unassigned | Unassigned | Unassigned | 904_0  | Clustered | 6 VC_904_0    | 6   | 0.233  | 1          | 0.233  | 0 | 0 | 0 | 1 Ref      |
| MK562502 | Unassigned | Unassigned | Unassigned | 330_0  | Clustered | 27 VC_330_0   | 27  | 0.5088 | 1          | 0.5088 | 0 | 0 | 0 | 0.8661 Ref |
| MK562503 | Unassigned | Unassigned | Unassigned | 111_0  | Clustered | 91 VC_111_0   | 91  | 0.9587 | 1          | 0.9587 | 0 | 0 | 0 | 1 Ref      |
| MK562504 | Unassigned | Unassigned | Unassigned | 330_0  | Clustered | 27 VC_330_0   | 27  | 0.5088 | 1          | 0.5088 | 0 | 0 | 0 | 0.8661 Ref |
| MK562505 | Unassigned | Unassigned | Unassigned | 330_0  | Clustered | 27 VC_330_0   | 27  | 0.5088 | 1          | 0.5088 | 0 | 0 | 0 | 0.8661 Ref |
| MK568062 | Unassigned | Unassigned | Unassigned | 428_0  | Clustered | 33 VC_428_0   | 33  | 0.9915 | 1          | 0.9915 | 0 | 0 | 0 | 1 Ref      |
| MK568540 | Unassigned | Unassigned | Unassigned | 531_0  | Clustered | 9 VC_531_0    | 9   | 0.26   | 1          | 0.26   | 0 | 0 | 0 | 1 Ref      |
| MK570053 | Unassigned | Unassigned | Unassigned | 1395_0 | Clustered | 3 VC_1395_0   | 3   | 0.7761 | 0.9639009  | 0.7481 | 0 | 0 | 0 | 1 Ref      |
| MK570054 | Unassigned | Unassigned | Unassigned | 1395_0 | Clustered | 3 VC_1395_0   | 3   | 0.7761 | 0.9639009  | 0.7481 | 0 | 0 | 0 | 1 Ref      |
| MK570055 | Unassigned | Unassigned | Unassigned | 1395_0 | Clustered | 3 VC_1395_0   | 3   | 0.7761 | 0.9639009  | 0.7481 | 0 | 0 | 0 | 1 Ref      |
| MK570225 | Unassigned | Unassigned | Unassigned | 108_0  | Clustered | 33 VC_108_0   | 33  | 0.949  | 1          | 0.949  | 0 | 0 | 0 | 1 Ref      |
| MK573636 | Unassigned | Unassigned | Unassigned | 590_0  | Clustered | 27 VC_590_0   | 27  | 0.9947 | 1          | 0.9947 | 0 | 0 | 0 | 1 Ref      |
| MK574011 | Unassigned | Unassigned | Unassigned | 117_0  | Clustered | 9 VC_117_0    | 9   | 0.9977 | 0.9898637  | 0.9876 | 0 | 0 | 0 | 1 Ref      |
| MK574078 | Unassigned | Unassigned | Unassigned | 749_0  | Clustered | 40 VC_749_0   | 40  | 0.7517 | 1          | 0.7517 | 0 | 0 | 0 | 1 Ref      |
| MK577502 | Unassigned | Unassigned | Unassigned | 600_0  | Clustered | 3 VC_600_0    | 3   | 0.0541 | 0.97110069 | 0.0526 | 0 | 0 | 0 | 1 Ref      |
| MK578530 | Unassigned | Unassigned | Unassigned | 637_1  | Clustered | 27 VC_637_1   | 27  | 0.2578 | 1          | 0.2578 | 0 | 0 | 0 | 0.9858 Ref |
| MK580972 | Unassigned | Unassigned | Unassigned | 506_0  | Clustered | 8 VC_506_0    | 8   | 0.7376 | 1          | 0.7376 | 0 | 0 | 0 | 1 Ref      |
| MK584893 | Unassigned | Unassigned | Unassigned | 149_8  | Clustered | 66 VC_149_8   | 66  | 0.4565 | 1          | 0.4565 | 0 | 0 | 0 | 0.8182 Ref |
| MK598851 | Unassigned | Unassigned | Unassigned | 111_0  | Clustered | 91 VC_111_0   | 91  | 0.9587 | 1          | 0.9587 | 0 | 0 | 0 | 1 Ref      |
| MK599315 | Unassigned | Unassigned | Unassigned | 344_1  | Clustered | 3 VC_344_1    | 3   | 0.0359 | 0.93348877 | 0.0335 | 0 | 0 | 0 | 1 Ref      |
| MK599416 | Unassigned | Unassigned | Unassigned | 461_0  | Clustered | 96 VC_461_0   | 96  | 0.9307 | 1          | 0.9307 | 0 | 0 | 0 | 0.9575 Ref |
| MK605242 | Unassigned | Unassigned | Unassigned | 1173_0 | Clustered | 6 VC_1173_0   | 6   | 0.9951 | 0.99999296 | 0.9951 | 0 | 0 | 0 | 1 Ref      |
| MK605243 | Unassigned | Unassigned | Unassigned | 1173_0 | Clustered | 6 VC_1173_0   | 6   | 0.9951 | 0.99999296 | 0.9951 | 0 | 0 | 0 | 1 Ref      |
| MK605244 | Unassigned | Unassigned | Unassigned | 1173_0 | Clustered | 6 VC_1173_0   | 6   | 0.9951 | 0.99999296 | 0.9951 | 0 | 0 | 0 | 1 Ref      |
| MK605245 | Unassigned | Unassigned | Unassigned | 1173_0 | Clustered | 6 VC_1173_0   | 6   | 0.9951 | 0.99999296 | 0.9951 | 0 | 0 | 0 | 1 Ref      |
| MK605246 | Unassigned | Unassigned | Unassigned | 1173_0 | Clustered | 6 VC_1173_0   | 6   | 0.9951 | 0.99999296 | 0.9951 | 0 | 0 | 0 | 1 Ref      |
| MK608335 | Unassigned | Unassigned | Unassigned | 385_0  | Clustered | 51 VC_385_0   | 51  | 0.8754 | 1          | 0.8754 | 0 | 0 | 0 | 1 Ref      |
| MK608336 | Unassigned | Unassigned | Unassigned | 966_0  | Clustered | 3 VC_966_0    | 3   | 0.3549 | 0.99840333 | 0.3543 | 0 | 0 | 0 | 1 Ref      |
| MK610268 | Unassigned | Unassigned | Unassigned | 451_0  | Clustered | 80 VC_451_0   | 80  | 0.9991 | 1          | 0.9991 | 0 | 0 | 0 | 1 Ref      |
| MK613343 | Unassigned | Unassigned | Unassigned | 305_0  | Clustered | 12 VC_305_0   | 12  | 0.5745 | 1          | 0.5745 | 0 | 0 | 0 | 0.8485 Ref |
| MK613344 | Unassigned | Unassigned | Unassigned | 305_0  | Clustered | 12 VC_305_0   | 12  | 0.5745 | 1          | 0.5745 | 0 | 0 | 0 | 0.8485 Ref |
| MK613345 | Unassigned | Unassigned | Unassigned | 305_0  | Clustered | 12 VC_305_0   | 12  | 0.5745 | 1          | 0.5745 | 0 | 0 | 0 | 0.8485 Ref |
| MK613346 | Unassigned | Unassigned | Unassigned | 304_0  | Clustered | 11 VC_304_0   | 11  | 0.7869 | 1          | 0.7869 | 0 | 0 | 0 | 1 Ref      |
| MK618657 | Unassigned | Unassigned | Unassigned | 938_0  | Clustered | 99 VC_938_0   | 99  | 0.9119 | 1          | 0.9119 | 0 | 0 | 0 | 0.9928 Ref |
| MK618658 | Unassigned | Unassigned | Unassigned | 823_0  | Clustered | 124 VC_823_0  | 124 | 0.9492 | 1          | 0.9492 | 0 | 0 | 0 | 1 Ref      |
| MK618715 | Unassigned | Unassigned | Unassigned | 359_0  | Clustered | 7 VC_359_0    | 7   | 0.3703 | 1          | 0.3703 | 0 | 0 | 0 | 1 Ref      |
| MK618716 | Unassigned | Unassigned | Unassigned | 12_0   | Clustered | 21 VC_12_0    | 21  | 0.2274 | 1          | 0.2274 | 0 | 0 | 0 | 0.9571 Ref |
| MK620893 | Unassigned | Unassigned | Unassigned | 551_7  | Clustered | 28 VC_551_7   | 28  | 0.1661 | 1          | 0.1661 | 0 | 0 | 0 | 0.8519 Ref |
| MK620894 | Unassigned | Unassigned | Unassigned | 1158_0 | Clustered | 3 VC_1158_0   | 3   | 0.3179 | 0.99335558 | 0.3158 | 0 | 0 | 0 | 1 Ref      |
| MK620895 | Unassigned | Unassigned | Unassigned | 1240_0 | Clustered | 82 VC_1240_0  | 82  | 0.7945 | 1          | 0.7945 | 0 | 0 | 0 | 1 Ref      |
| MK620896 | Unassigned | Unassigned | Unassigned | 1072_0 | Clustered | 2 VC_1072_0   | 2   | 0.0264 | 0.95117401 | 0.0251 | 0 | 0 | 0 | 1 Ref      |
| MK620897 | Unassigned | Unassigned | Unassigned | 1344_0 | Clustered | 78 VC_1344_0  | 78  | 0.9732 | 1          | 0.9732 | 0 | 0 | 0 | 1 Ref      |
| MK620898 | Unassigned | Unassigned | Unassigned | 508_0  | Clustered | 32 VC_508_0   | 32  | 0.906  | 1          | 0.906  | 0 | 0 | 0 | 1 Ref      |
| MK620900 | Unassigned | Unassigned | Unassigned | 1369_0 | Clustered | 3 VC_1369_0   | 3   | 0.9809 | 0.9595722  | 0.9412 | 0 | 0 | 0 | 1 Ref      |
| MK620901 | Unassigned | Unassigned | Unassigned | 1163_0 | Clustered | 28 VC_1163_0  | 28  | 0.4923 | 1          | 0.4923 | 0 | 0 | 0 | 1 Ref      |
| MK620902 | Unassigned | Unassigned | Unassigned | 1240_0 | Clustered | 82 VC_1240_0  | 82  | 0.7945 | 1          | 0.7945 | 0 | 0 | 0 | 1 Ref      |
| MK620903 | Unassigned | Unassigned | Unassigned | 1240_0 | Clustered | 82 VC_1240_0  | 82  | 0.7945 | 1          | 0.7945 | 0 | 0 | 0 | 1 Ref      |
| MK620904 | Unassigned | Unassigned | Unassigned | 1163_0 | Clustered | 28 VC_1163_0  | 28  | 0.4923 | 1          | 0.4923 | 0 | 0 | 0 | 1 Ref      |
| MK620905 | Unassigned | Unassigned | Unassigned | 1240_0 | Clustered | 82 VC_1240_0  | 82  | 0.7945 | 1          | 0.7945 | 0 | 0 | 0 | 1 Ref      |
| MK629527 | Unassigned | Unassigned | Unassigned | 743_0  | Clustered | 15 VC_743_0   | 15  | 1      | 1          | 1      | 0 | 0 | 0 | 1 Ref      |
| MK629528 | Unassigned | Unassigned | Unassigned | 156_0  | Clustered | 12 VC_156_0   | 12  | 0.9062 | 1          | 0.9062 | 0 | 0 | 0 | 1 Ref      |
| MK630230 | Unassigned | Unassigned | Unassigned | 192_0  | Clustered | 15 VC_192_0   | 15  | 0.5071 | 1          | 0.5071 | 0 | 0 | 0 | 1 Ref      |
| MK637516 | Unassigned | Unassigned | Unassigned | 969_0  | Clustered | 3 VC_969_0    | 3   | 0.8314 | 0.99762851 | 0.8295 | 0 | 0 | 0 | 1 Ref      |
| MK639187 | Unassigned | Unassigned | Unassigned | 286_13 | Clustered | 10 VC_286_13  | 10  | 0.0698 | 0.99999929 | 0.0698 | 0 | 0 | 0 | 0.9556 Ref |
| MK651787 | Unassigned | Unassigned | Unassigned | 705_0  | Clustered | 11 VC_705_0   | 11  | 0.8861 | 1          | 0.8861 | 0 | 0 | 0 | 1 Ref      |
| MK656892 | Unassigned | Unassigned | Unassigned | 149_8  | Clustered | 66 VC_149_8   | 66  | 0.4565 | 1          | 0.4565 | 0 | 0 | 0 | 0.8182 Ref |
| MK658834 | Unassigned | Unassigned | Unassigned | 9_0    | Clustered | 38 VC_9_0     | 38  | 0.4895 | 1          | 0.4895 | 0 | 0 | 0 | 1 Ref      |
| MK660712 | Unassigned | Unassigned | Unassigned | 949_0  | Clustered | 10 VC_949_0   | 10  | 0.5977 | 1          | 0.5977 | 0 | 0 | 0 | 1 Ref      |
| MK660714 | Unassigned | Unassigned | Unassigned | 1160_0 | Clustered | 73 VC_1160_0  | 73  | 0.9835 | 1          | 0.9835 | 0 | 0 | 0 | 1 Ref      |
| MK672798 | Unassigned | Unassigned | Unassigned | 795_0  | Clustered | 19 VC_795_0   | 19  | 0.6848 | 1          | 0.6848 | 0 | 0 | 0 | 1 Ref      |
| MK672799 | Unassigned | Unassigned | Unassigned | 299_0  | Clustered | 24 VC_299_0   | 24  | 0.9905 | 1          | 0.9905 | 0 | 0 | 0 | 1 Ref      |
| MK672800 | Unassigned | Unassigned | Unassigned | 299_0  | Clustered | 24 VC_299_0   | 24  | 0.9905 | 1          | 0.9905 | 0 | 0 | 0 | 1 Ref      |
| MK672801 | Unassigned | Unassigned | Unassigned | 299_0  | Clustered | 24 VC_299_0   | 24  | 0.9905 | 1          | 0.9905 | 0 | 0 | 0 | 1 Ref      |
| MK672803 | Unassigned | Unassigned | Unassigned | 299_0  | Clustered | 24 VC_299_0   | 24  | 0.9905 | 1          | 0.9905 | 0 | 0 | 0 | 1 Ref      |
| MK672804 | Unassigned | Unassigned | Unassigned | 299_0  | Clustered | 24 VC_299_0   | 24  | 0.9905 | 1          | 0.9905 | 0 | 0 | 0 | 1 Ref      |
| MK673511 | Unassigned | Unassigned | Unassigned | 428_0  | Clustered | 33 VC_428_0   | 33  | 0.9915 | 1          | 0.9915 | 0 | 0 | 0 | 1 Ref      |
| MK685667 | Unassigned | Unassigned | Unassigned | 123_0  | Clustered | 23 VC_123_0   | 23  | 0.817  | 1          | 0.817  | 0 | 0 | 0 | 1 Ref      |
| MK685668 | Unassigned | Unassigned | Unassigned | 386_0  | Clustered | 49 VC_386_0   | 49  | 0.7941 | 1          | 0.7941 | 0 | 0 | 0 | 1 Ref      |
| MK686068 | Unassigned | Unassigned | Unassigned | 373_0  | Clustered | 10 VC_373_0   | 10  | 0.7471 | 1          | 0.7471 | 0 | 0 | 0 | 1 Ref      |
| MK686069 | Unassigned | Unassigned | Unassigned | 373_0  | Clustered | 10 VC_373_0   | 10  | 0.7471 | 1          | 0.7471 | 0 | 0 | 0 | 1 Ref      |
| MK686071 | Unassigned | Unassigned | Unassigned | 975_0  | Clustered | 11 VC_975_0   | 11  | 0.9687 | 1          | 0.9687 | 0 | 0 | 0 | 1 Ref      |
| MK689364 | Unassigned | Unassigned | Unassigned | 442_2  | Clustered | 4 VC_442_2    | 4   | 0.0844 | 0.99988129 | 0.0844 | 0 | 0 | 0 | 0.8333 Ref |
| MK693005 | Unassigned | Unassigned | Unassigned | 111_0  | Clustered | 91 VC_111_0   | 91  | 0.9587 | 1          | 0.9587 | 0 | 0 | 0 | 1 Ref      |
| MK693030 | Unassigned | Unassigned | Unassigned | 91_0   | Clustered | 22 VC_91_0    | 22  | 0.5318 | 1          | 0.5318 | 0 | 0 | 0 | 1 Ref      |
| MK714353 | Unassigned | Unassigned | Unassigned | 31_0   | Clustered | 9 VC_31_0     | 9   | 0.3435 | 1          | 0.3435 | 0 | 0 | 0 | 0.6944 Ref |
| MK719701 | Unassigned | Unassigned | Unassigned | 1396_0 | Clustered | 110 VC_1396_0 | 110 | 1      | 1          | 1      | 0 | 0 | 0 | 0.9746 Ref |
| MK719702 | Unassigned | Unassigned | Unassigned | 1396_0 | Clustered | 110 VC_1396_0 | 110 | 1      | 1          | 1      | 0 | 0 | 0 | 0.9746 Ref |
| MK719703 | Unassigned | Unassigned | Unassigned | 1396_0 | Clustered | 110 VC_1396_0 | 110 | 1      | 1          | 1      | 0 | 0 | 0 | 0.9746 Ref |



[illegible]



|          |            |            |            |        |           |              |     |        |            |        |   |   |   |            |
|----------|------------|------------|------------|--------|-----------|--------------|-----|--------|------------|--------|---|---|---|------------|
| MK737943 | Unassigned | Unassigned | Unassigned | 950_0  | Clustered | 38 VC_950_0  | 38  | 0.9443 | 1          | 0.9443 | 0 | 0 | 0 | 1 Ref      |
| MK737944 | Unassigned | Unassigned | Unassigned | 1348_0 | Clustered | 5 VC_1348_0  | 5   | 0.5462 | 0.99999985 | 0.5462 | 0 | 0 | 0 | 1 Ref      |
| MK756083 | Unassigned | Unassigned | Unassigned | 912_0  | Clustered | 76 VC_912_0  | 76  | 0.979  | 1          | 0.979  | 0 | 0 | 0 | 1 Ref      |
| MK756084 | Unassigned | Unassigned | Unassigned | 912_0  | Clustered | 76 VC_912_0  | 76  | 0.979  | 1          | 0.979  | 0 | 0 | 0 | 1 Ref      |
| MK756085 | Unassigned | Unassigned | Unassigned | 912_0  | Clustered | 76 VC_912_0  | 76  | 0.979  | 1          | 0.979  | 0 | 0 | 0 | 1 Ref      |
| MK756086 | Unassigned | Unassigned | Unassigned | 912_0  | Clustered | 76 VC_912_0  | 76  | 0.979  | 1          | 0.979  | 0 | 0 | 0 | 1 Ref      |
| MK756087 | Unassigned | Unassigned | Unassigned | 912_0  | Clustered | 76 VC_912_0  | 76  | 0.979  | 1          | 0.979  | 0 | 0 | 0 | 1 Ref      |
| MK756088 | Unassigned | Unassigned | Unassigned | 912_0  | Clustered | 76 VC_912_0  | 76  | 0.979  | 1          | 0.979  | 0 | 0 | 0 | 1 Ref      |
| MK756089 | Unassigned | Unassigned | Unassigned | 912_0  | Clustered | 76 VC_912_0  | 76  | 0.979  | 1          | 0.979  | 0 | 0 | 0 | 1 Ref      |
| MK756090 | Unassigned | Unassigned | Unassigned | 912_0  | Clustered | 76 VC_912_0  | 76  | 0.979  | 1          | 0.979  | 0 | 0 | 0 | 1 Ref      |
| MK756091 | Unassigned | Unassigned | Unassigned | 912_0  | Clustered | 76 VC_912_0  | 76  | 0.979  | 1          | 0.979  | 0 | 0 | 0 | 1 Ref      |
| MK756092 | Unassigned | Unassigned | Unassigned | 912_0  | Clustered | 76 VC_912_0  | 76  | 0.979  | 1          | 0.979  | 0 | 0 | 0 | 1 Ref      |
| MK756093 | Unassigned | Unassigned | Unassigned | 912_0  | Clustered | 76 VC_912_0  | 76  | 0.979  | 1          | 0.979  | 0 | 0 | 0 | 1 Ref      |
| MK756094 | Unassigned | Unassigned | Unassigned | 912_0  | Clustered | 76 VC_912_0  | 76  | 0.979  | 1          | 0.979  | 0 | 0 | 0 | 1 Ref      |
| MK756095 | Unassigned | Unassigned | Unassigned | 912_0  | Clustered | 76 VC_912_0  | 76  | 0.979  | 1          | 0.979  | 0 | 0 | 0 | 1 Ref      |
| MK756096 | Unassigned | Unassigned | Unassigned | 912_0  | Clustered | 76 VC_912_0  | 76  | 0.979  | 1          | 0.979  | 0 | 0 | 0 | 1 Ref      |
| MK757445 | Unassigned | Unassigned | Unassigned | 551_7  | Clustered | 28 VC_551_7  | 28  | 0.1661 | 1          | 0.1661 | 0 | 0 | 0 | 0.8519 Ref |
| MK757446 | Unassigned | Unassigned | Unassigned | 568_0  | Clustered | 8 VC_568_0   | 8   | 0.5738 | 1          | 0.5738 | 0 | 0 | 0 | 1 Ref      |
| MK757447 | Unassigned | Unassigned | Unassigned | 1240_0 | Clustered | 82 VC_1240_0 | 82  | 0.7945 | 1          | 0.7945 | 0 | 0 | 0 | 1 Ref      |
| MK757448 | Unassigned | Unassigned | Unassigned | 1362_0 | Clustered | 6 VC_1362_0  | 6   | 1      | 1          | 1      | 0 | 0 | 0 | 1 Ref      |
| MK757449 | Unassigned | Unassigned | Unassigned | 1360_0 | Clustered | 31 VC_1360_0 | 31  | 0.8837 | 1          | 0.8837 | 0 | 0 | 0 | 1 Ref      |
| MK759854 | Unassigned | Unassigned | Unassigned | 461_0  | Clustered | 96 VC_461_0  | 96  | 0.9307 | 1          | 0.9307 | 0 | 0 | 0 | 0.9575 Ref |
| MK759883 | Unassigned | Unassigned | Unassigned | 637_1  | Clustered | 27 VC_637_1  | 27  | 0.2578 | 1          | 0.2578 | 0 | 0 | 0 | 0.9858 Ref |
| MK759884 | Unassigned | Unassigned | Unassigned | 328_0  | Clustered | 11 VC_328_0  | 11  | 0.4707 | 1          | 0.4707 | 0 | 0 | 0 | 1 Ref      |
| MK759918 | Unassigned | Unassigned | Unassigned | 731_0  | Clustered | 2 VC_731_0   | 2   | 0.3697 | 0.94979793 | 0.3512 | 0 | 0 | 0 | 1 Ref      |
| MK761195 | Unassigned | Unassigned | Unassigned | 637_0  | Clustered | 115 VC_637_0 | 115 | 0.731  | 1          | 0.731  | 0 | 0 | 0 | 0.8764 Ref |
| MK761196 | Unassigned | Unassigned | Unassigned | 637_0  | Clustered | 115 VC_637_0 | 115 | 0.731  | 1          | 0.731  | 0 | 0 | 0 | 0.8764 Ref |
| MK761197 | Unassigned | Unassigned | Unassigned | 637_0  | Clustered | 115 VC_637_0 | 115 | 0.731  | 1          | 0.731  | 0 | 0 | 0 | 0.8764 Ref |
| MK761198 | Unassigned | Unassigned | Unassigned | 637_0  | Clustered | 115 VC_637_0 | 115 | 0.731  | 1          | 0.731  | 0 | 0 | 0 | 0.8764 Ref |
| MK761199 | Unassigned | Unassigned | Unassigned | 637_0  | Clustered | 115 VC_637_0 | 115 | 0.731  | 1          | 0.731  | 0 | 0 | 0 | 0.8764 Ref |
| MK764384 | Unassigned | Unassigned | Unassigned | 96_0   | Clustered | 30 VC_96_0   | 30  | 0.718  | 1          | 0.718  | 0 | 0 | 0 | 1 Ref      |
| MK764436 | Unassigned | Unassigned | Unassigned | 1040_0 | Clustered | 23 VC_1040_0 | 23  | 0.9605 | 1          | 0.9605 | 0 | 0 | 0 | 1 Ref      |
| MK764437 | Unassigned | Unassigned | Unassigned | 1023_0 | Clustered | 8 VC_1023_0  | 8   | 0.8574 | 1          | 0.8574 | 0 | 0 | 0 | 1 Ref      |
| MK764438 | Unassigned | Unassigned | Unassigned | 1040_0 | Clustered | 23 VC_1040_0 | 23  | 0.9605 | 1          | 0.9605 | 0 | 0 | 0 | 1 Ref      |
| MK764439 | Unassigned | Unassigned | Unassigned | 1040_0 | Clustered | 23 VC_1040_0 | 23  | 0.9605 | 1          | 0.9605 | 0 | 0 | 0 | 1 Ref      |
| MK764440 | Unassigned | Unassigned | Unassigned | 1023_0 | Clustered | 8 VC_1023_0  | 8   | 0.8574 | 1          | 0.8574 | 0 | 0 | 0 | 1 Ref      |
| MK764441 | Unassigned | Unassigned | Unassigned | 1157_0 | Clustered | 24 VC_1157_0 | 24  | 1      | 1          | 1      | 0 | 0 | 0 | 1 Ref      |
| MK764442 | Unassigned | Unassigned | Unassigned | 1021_0 | Clustered | 10 VC_1021_0 | 10  | 0.8876 | 1          | 0.8876 | 0 | 0 | 0 | 1 Ref      |
| MK764443 | Unassigned | Unassigned | Unassigned | 1040_0 | Clustered | 23 VC_1040_0 | 23  | 0.9605 | 1          | 0.9605 | 0 | 0 | 0 | 1 Ref      |
| MK764444 | Unassigned | Unassigned | Unassigned | 1040_0 | Clustered | 23 VC_1040_0 | 23  | 0.9605 | 1          | 0.9605 | 0 | 0 | 0 | 1 Ref      |
| MK764445 | Unassigned | Unassigned | Unassigned | 1021_0 | Clustered | 10 VC_1021_0 | 10  | 0.8876 | 1          | 0.8876 | 0 | 0 | 0 | 1 Ref      |
| MK764446 | Unassigned | Unassigned | Unassigned | 1040_0 | Clustered | 23 VC_1040_0 | 23  | 0.9605 | 1          | 0.9605 | 0 | 0 | 0 | 1 Ref      |
| MK764447 | Unassigned | Unassigned | Unassigned | 1040_0 | Clustered | 23 VC_1040_0 | 23  | 0.9605 | 1          | 0.9605 | 0 | 0 | 0 | 1 Ref      |
| MK764448 | Unassigned | Unassigned | Unassigned | 1021_0 | Clustered | 10 VC_1021_0 | 10  | 0.8876 | 1          | 0.8876 | 0 | 0 | 0 | 1 Ref      |
| MK764449 | Unassigned | Unassigned | Unassigned | 1157_0 | Clustered | 24 VC_1157_0 | 24  | 1      | 1          | 1      | 0 | 0 | 0 | 1 Ref      |
| MK764450 | Unassigned | Unassigned | Unassigned | 1023_0 | Clustered | 8 VC_1023_0  | 8   | 0.8574 | 1          | 0.8574 | 0 | 0 | 0 | 1 Ref      |
| MK765551 | Unassigned | Unassigned | Unassigned | 1398_0 | Clustered | 2 VC_1398_0  | 2   | 1      | 1          | 1      | 0 | 0 | 0 | 1 Ref      |
| MK765552 | Unassigned | Unassigned | Unassigned | 1283_0 | Clustered | 26 VC_1283_0 | 26  | 0.5446 | 1          | 0.5446 | 0 | 0 | 0 | 1 Ref      |
| MK765553 | Unassigned | Unassigned | Unassigned | 1283_0 | Clustered | 26 VC_1283_0 | 26  | 0.5446 | 1          | 0.5446 | 0 | 0 | 0 | 1 Ref      |
| MK765555 | Unassigned | Unassigned | Unassigned | 1325_0 | Clustered | 7 VC_1325_0  | 7   | 0.9166 | 0.99999981 | 0.9166 | 0 | 0 | 0 | 1 Ref      |
| MK765556 | Unassigned | Unassigned | Unassigned | 1283_0 | Clustered | 26 VC_1283_0 | 26  | 0.5446 | 1          | 0.5446 | 0 | 0 | 0 | 1 Ref      |
| MK765557 | Unassigned | Unassigned | Unassigned | 1211_0 | Clustered | 25 VC_1211_0 | 25  | 1      | 1          | 1      | 0 | 0 | 0 | 1 Ref      |
| MK765558 | Unassigned | Unassigned | Unassigned | 1399_0 | Clustered | 9 VC_1399_0  | 9   | 1      | 0          | 0      | 0 | 0 | 0 | 1 Ref      |
| MK765559 | Unassigned | Unassigned | Unassigned | 1119_0 | Clustered | 20 VC_1119_0 | 20  | 0.6751 | 0.99997892 | 0.6751 | 0 | 0 | 0 | 1 Ref      |
| MK765560 | Unassigned | Unassigned | Unassigned | 1283_0 | Clustered | 26 VC_1283_0 | 26  | 0.5446 | 1          | 0.5446 | 0 | 0 | 0 | 1 Ref      |
| MK765561 | Unassigned | Unassigned | Unassigned | 1243_0 | Clustered | 52 VC_1243_0 | 52  | 0.9126 | 0.92708311 | 0.8461 | 0 | 0 | 0 | 1 Ref      |
| MK765562 | Unassigned | Unassigned | Unassigned | 1283_0 | Clustered | 26 VC_1283_0 | 26  | 0.5446 | 1          | 0.5446 | 0 | 0 | 0 | 1 Ref      |
| MK765563 | Unassigned | Unassigned | Unassigned | 1243_0 | Clustered | 52 VC_1243_0 | 52  | 0.9126 | 0.92708311 | 0.8461 | 0 | 0 | 0 | 1 Ref      |
| MK765564 | Unassigned | Unassigned | Unassigned | 1243_0 | Clustered | 52 VC_1243_0 | 52  | 0.9126 | 0.92708311 | 0.8461 | 0 | 0 | 0 | 1 Ref      |
| MK765565 | Unassigned | Unassigned | Unassigned | 1283_0 | Clustered | 26 VC_1283_0 | 26  | 0.5446 | 1          | 0.5446 | 0 | 0 | 0 | 1 Ref      |
| MK765567 | Unassigned | Unassigned | Unassigned | 1325_0 | Clustered | 7 VC_1325_0  | 7   | 0.9166 | 0.99999981 | 0.9166 | 0 | 0 | 0 | 1 Ref      |
| MK765568 | Unassigned | Unassigned | Unassigned | 1243_0 | Clustered | 52 VC_1243_0 | 52  | 0.9126 | 0.92708311 | 0.8461 | 0 | 0 | 0 | 1 Ref      |
| MK765569 | Unassigned | Unassigned | Unassigned | 1243_0 | Clustered | 52 VC_1243_0 | 52  | 0.9126 | 0.92708311 | 0.8461 | 0 | 0 | 0 | 1 Ref      |
| MK765571 | Unassigned | Unassigned | Unassigned | 1285_0 | Clustered | 25 VC_1285_0 | 25  | 1      | 1          | 1      | 0 | 0 | 0 | 1 Ref      |
| MK765572 | Unassigned | Unassigned | Unassigned | 1280_0 | Clustered | 2 VC_1280_0  | 2   | 0.0695 | 0.94944661 | 0.066  | 0 | 0 | 0 | 1 Ref      |
| MK765573 | Unassigned | Unassigned | Unassigned | 1400_0 | Clustered | 2 VC_1400_0  | 2   | 1      | 1          | 1      | 0 | 0 | 0 | 1 Ref      |
| MK765574 | Unassigned | Unassigned | Unassigned | 1285_0 | Clustered | 25 VC_1285_0 | 25  | 1      | 1          | 1      | 0 | 0 | 0 | 1 Ref      |
| MK765575 | Unassigned | Unassigned | Unassigned | 1401_0 | Clustered | 2 VC_1401_0  | 2   | 1      | 1          | 1      | 0 | 0 | 0 | 1 Ref      |
| MK765576 | Unassigned | Unassigned | Unassigned | 1285_0 | Clustered | 25 VC_1285_0 | 25  | 1      | 1          | 1      | 0 | 0 | 0 | 1 Ref      |
| MK765577 | Unassigned | Unassigned | Unassigned | 1285_0 | Clustered | 25 VC_1285_0 | 25  | 1      | 1          | 1      | 0 | 0 | 0 | 1 Ref      |
| MK765578 | Unassigned | Unassigned | Unassigned | 1401_0 | Clustered | 2 VC_1401_0  | 2   | 1      | 1          | 1      | 0 | 0 | 0 | 1 Ref      |
| MK765579 | Unassigned | Unassigned | Unassigned | 1062_0 | Clustered | 45 VC_1062_0 | 45  | 0.9734 | 0.50949847 | 0.4959 | 0 | 0 | 0 | 1 Ref      |
| MK765580 | Unassigned | Unassigned | Unassigned | 1285_0 | Clustered | 25 VC_1285_0 | 25  | 1      | 1          | 1      | 0 | 0 | 0 | 1 Ref      |
| MK765581 | Unassigned | Unassigned | Unassigned | 1399_0 | Clustered | 9 VC_1399_0  | 9   | 1      | 0          | 0      | 0 | 0 | 0 | 1 Ref      |
| MK765582 | Unassigned | Unassigned | Unassigned | 1062_0 | Clustered | 45 VC_1062_0 | 45  | 0.9734 | 0.50949847 | 0.4959 | 0 | 0 | 0 | 1 Ref      |
| MK765583 | Unassigned | Unassigned | Unassigned | 1308_0 | Clustered | 12 VC_1308_0 | 12  | 0.8184 | 0.9810731  | 0.8029 | 0 | 0 | 0 | 1 Ref      |
| MK765587 | Unassigned | Unassigned | Unassigned | 1402_0 | Clustered | 14 VC_1402_0 | 14  | 0.1673 | 0.51390354 | 0.086  | 0 | 0 | 0 | 1 Ref      |
| MK765588 | Unassigned | Unassigned | Unassigned | 1402_0 | Clustered | 14 VC_1402_0 | 14  | 0.1673 | 0.51390354 | 0.086  | 0 | 0 | 0 | 1 Ref      |
| MK765589 | Unassigned | Unassigned | Unassigned | 1403_0 | Clustered | 28 VC_1403_0 | 28  | 0.753  | 1          | 0.753  | 0 | 0 | 0 | 1 Ref      |
| MK765590 | Unassigned | Unassigned | Unassigned | 1277_0 | Clustered | 14 VC_1277_0 | 14  | 0.8218 | 1          | 0.8218 | 0 | 0 | 0 | 1 Ref      |
| MK765591 | Unassigned | Unassigned | Unassigned | 1283_0 | Clustered | 26 VC_1283_0 | 26  | 0.5446 | 1          | 0.5446 | 0 | 0 | 0 | 1 Ref      |



|          |            |            |            |        |                     |               |     |        |            |        |   |   |   |            |
|----------|------------|------------|------------|--------|---------------------|---------------|-----|--------|------------|--------|---|---|---|------------|
| MK765592 | Unassigned | Unassigned | Unassigned | 1283_0 | Clustered           | 26 VC_1283_0  | 26  | 0.5446 | 1          | 0.5446 | 0 | 0 | 0 | 1 Ref      |
| MK765593 | Unassigned | Unassigned | Unassigned | 1283_0 | Clustered           | 26 VC_1283_0  | 26  | 0.5446 | 1          | 0.5446 | 0 | 0 | 0 | 1 Ref      |
| MK765594 | Unassigned | Unassigned | Unassigned | 1243_0 | Clustered           | 52 VC_1243_0  | 52  | 0.9126 | 0.92708311 | 0.8461 | 0 | 0 | 0 | 1 Ref      |
| MK765596 | Unassigned | Unassigned | Unassigned | 1283_0 | Clustered           | 26 VC_1283_0  | 26  | 0.5446 | 1          | 0.5446 | 0 | 0 | 0 | 1 Ref      |
| MK765598 | Unassigned | Unassigned | Unassigned | 1402_0 | Clustered           | 14 VC_1402_0  | 14  | 0.1673 | 0.51390354 | 0.086  | 0 | 0 | 0 | 1 Ref      |
| MK765599 | Unassigned | Unassigned | Unassigned | 1402_0 | Clustered           | 14 VC_1402_0  | 14  | 0.1673 | 0.51390354 | 0.086  | 0 | 0 | 0 | 1 Ref      |
| MK765600 | Unassigned | Unassigned | Unassigned | 1325_0 | Clustered           | 7 VC_1325_0   | 7   | 0.9166 | 0.99999981 | 0.9166 | 0 | 0 | 0 | 1 Ref      |
| MK765601 | Unassigned | Unassigned | Unassigned | 1303_0 | Clustered           | 6 VC_1303_0   | 6   | 1      | 1          | 1      | 0 | 0 | 0 | 1 Ref      |
| MK765602 | Unassigned | Unassigned | Unassigned | 1140_0 | Clustered           | 4 VC_1140_0   | 4   | 0.1325 | 0.66207199 | 0.0877 | 0 | 0 | 0 | 1 Ref      |
| MK765603 | Unassigned | Unassigned | Unassigned | 1119_0 | Clustered           | 20 VC_1119_0  | 20  | 0.6751 | 0.99997892 | 0.6751 | 0 | 0 | 0 | 1 Ref      |
| MK765604 | Unassigned | Unassigned | Unassigned | 1399_0 | Clustered           | 9 VC_1399_0   | 9   | 1      | 0          | 0      | 0 | 0 | 0 | 1 Ref      |
| MK765605 | Unassigned | Unassigned | Unassigned | 1406_0 | Clustered           | 2 VC_1406_0   | 2   | 1      | 1          | 1      | 0 | 0 | 0 | 1 Ref      |
| MK765606 | Unassigned | Unassigned | Unassigned | 1283_0 | Clustered           | 26 VC_1283_0  | 26  | 0.5446 | 1          | 0.5446 | 0 | 0 | 0 | 1 Ref      |
| MK765607 | Unassigned | Unassigned | Unassigned | 1283_0 | Clustered           | 26 VC_1283_0  | 26  | 0.5446 | 1          | 0.5446 | 0 | 0 | 0 | 1 Ref      |
| MK765609 | Unassigned | Unassigned | Unassigned | 1283_0 | Clustered           | 26 VC_1283_0  | 26  | 0.5446 | 1          | 0.5446 | 0 | 0 | 0 | 1 Ref      |
| MK765610 | Unassigned | Unassigned | Unassigned | 1325_0 | Clustered           | 7 VC_1325_0   | 7   | 0.9166 | 0.99999981 | 0.9166 | 0 | 0 | 0 | 1 Ref      |
| MK765611 | Unassigned | Unassigned | Unassigned | 1283_0 | Clustered           | 26 VC_1283_0  | 26  | 0.5446 | 1          | 0.5446 | 0 | 0 | 0 | 1 Ref      |
| MK765612 | Unassigned | Unassigned | Unassigned | 1283_0 | Clustered           | 26 VC_1283_0  | 26  | 0.5446 | 1          | 0.5446 | 0 | 0 | 0 | 1 Ref      |
| MK765613 | Unassigned | Unassigned | Unassigned | 1283_0 | Clustered           | 26 VC_1283_0  | 26  | 0.5446 | 1          | 0.5446 | 0 | 0 | 0 | 1 Ref      |
| MK765615 | Unassigned | Unassigned | Unassigned | 1283_0 | Clustered           | 26 VC_1283_0  | 26  | 0.5446 | 1          | 0.5446 | 0 | 0 | 0 | 1 Ref      |
| MK765617 | Unassigned | Unassigned | Unassigned | 1325_0 | Clustered           | 7 VC_1325_0   | 7   | 0.9166 | 0.99999981 | 0.9166 | 0 | 0 | 0 | 1 Ref      |
| MK765620 | Unassigned | Unassigned | Unassigned | 1104_0 | Clustered           | 154 VC_1104_0 | 154 | 0.8484 | 1          | 0.8484 | 0 | 0 | 0 | 1 Ref      |
| MK765621 | Unassigned | Unassigned | Unassigned | 1119_0 | Clustered           | 20 VC_1119_0  | 20  | 0.6751 | 0.99997892 | 0.6751 | 0 | 0 | 0 | 1 Ref      |
| MK765622 | Unassigned | Unassigned | Unassigned | 1399_0 | Clustered           | 9 VC_1399_0   | 9   | 1      | 0          | 0      | 0 | 0 | 0 | 1 Ref      |
| MK765623 | Unassigned | Unassigned | Unassigned | 1402_0 | Clustered           | 14 VC_1402_0  | 14  | 0.1673 | 0.51390354 | 0.086  | 0 | 0 | 0 | 1 Ref      |
| MK765625 | Unassigned | Unassigned | Unassigned | 1402_0 | Clustered           | 14 VC_1402_0  | 14  | 0.1673 | 0.51390354 | 0.086  | 0 | 0 | 0 | 1 Ref      |
| MK765626 | Unassigned | Unassigned | Unassigned | 1404_0 | Clustered/Singleton | 1 VC_1404_0   | 1   | 0      | 1          | 0      | 0 | 0 | 0 | 1 Ref      |
| MK765628 | Unassigned | Unassigned | Unassigned | 1402_0 | Clustered           | 14 VC_1402_0  | 14  | 0.1673 | 0.51390354 | 0.086  | 0 | 0 | 0 | 1 Ref      |
| MK765630 | Unassigned | Unassigned | Unassigned | 1402_0 | Clustered           | 14 VC_1402_0  | 14  | 0.1673 | 0.51390354 | 0.086  | 0 | 0 | 0 | 1 Ref      |
| MK765631 | Unassigned | Unassigned | Unassigned | 1402_0 | Clustered           | 14 VC_1402_0  | 14  | 0.1673 | 0.51390354 | 0.086  | 0 | 0 | 0 | 1 Ref      |
| MK765633 | Unassigned | Unassigned | Unassigned | 1283_0 | Clustered           | 26 VC_1283_0  | 26  | 0.5446 | 1          | 0.5446 | 0 | 0 | 0 | 1 Ref      |
| MK765634 | Unassigned | Unassigned | Unassigned | 1402_0 | Clustered           | 14 VC_1402_0  | 14  | 0.1673 | 0.51390354 | 0.086  | 0 | 0 | 0 | 1 Ref      |
| MK765638 | Unassigned | Unassigned | Unassigned | 1243_0 | Clustered           | 52 VC_1243_0  | 52  | 0.9126 | 0.92708311 | 0.8461 | 0 | 0 | 0 | 1 Ref      |
| MK765639 | Unassigned | Unassigned | Unassigned | 1062_0 | Clustered           | 45 VC_1062_0  | 45  | 0.9734 | 0.50949847 | 0.4959 | 0 | 0 | 0 | 1 Ref      |
| MK765640 | Unassigned | Unassigned | Unassigned | 1399_0 | Clustered           | 9 VC_1399_0   | 9   | 1      | 0          | 0      | 0 | 0 | 0 | 1 Ref      |
| MK765641 | Unassigned | Unassigned | Unassigned | 1406_0 | Clustered           | 2 VC_1406_0   | 2   | 1      | 1          | 1      | 0 | 0 | 0 | 1 Ref      |
| MK765642 | Unassigned | Unassigned | Unassigned | 1062_0 | Clustered           | 45 VC_1062_0  | 45  | 0.9734 | 0.50949847 | 0.4959 | 0 | 0 | 0 | 1 Ref      |
| MK765643 | Unassigned | Unassigned | Unassigned | 1062_0 | Clustered           | 45 VC_1062_0  | 45  | 0.9734 | 0.50949847 | 0.4959 | 0 | 0 | 0 | 1 Ref      |
| MK765644 | Unassigned | Unassigned | Unassigned | 1062_0 | Clustered           | 45 VC_1062_0  | 45  | 0.9734 | 0.50949847 | 0.4959 | 0 | 0 | 0 | 1 Ref      |
| MK765645 | Unassigned | Unassigned | Unassigned | 1077_0 | Clustered           | 48 VC_1077_0  | 48  | 0.8525 | 1          | 0.8525 | 0 | 0 | 0 | 1 Ref      |
| MK765646 | Unassigned | Unassigned | Unassigned | 1062_0 | Clustered           | 45 VC_1062_0  | 45  | 0.9734 | 0.50949847 | 0.4959 | 0 | 0 | 0 | 1 Ref      |
| MK765648 | Unassigned | Unassigned | Unassigned | 1283_0 | Clustered           | 26 VC_1283_0  | 26  | 0.5446 | 1          | 0.5446 | 0 | 0 | 0 | 1 Ref      |
| MK765649 | Unassigned | Unassigned | Unassigned | 1282_0 | Clustered           | 3 VC_1282_0   | 3   | 1      | 1          | 1      | 0 | 0 | 0 | 1 Ref      |
| MK765650 | Unassigned | Unassigned | Unassigned | 1398_0 | Clustered           | 2 VC_1398_0   | 2   | 1      | 1          | 1      | 0 | 0 | 0 | 1 Ref      |
| MK765651 | Unassigned | Unassigned | Unassigned | 1283_0 | Clustered           | 26 VC_1283_0  | 26  | 0.5446 | 1          | 0.5446 | 0 | 0 | 0 | 1 Ref      |
| MK765653 | Unassigned | Unassigned | Unassigned | 1331_0 | Clustered           | 4 VC_1331_0   | 4   | 0.7343 | 0.99899459 | 0.7335 | 0 | 0 | 0 | 1 Ref      |
| MK765654 | Unassigned | Unassigned | Unassigned | 1399_0 | Clustered           | 9 VC_1399_0   | 9   | 1      | 0          | 0      | 0 | 0 | 0 | 1 Ref      |
| MK765655 | Unassigned | Unassigned | Unassigned | 1211_0 | Clustered           | 25 VC_1211_0  | 25  | 1      | 1          | 1      | 0 | 0 | 0 | 1 Ref      |
| MK765656 | Unassigned | Unassigned | Unassigned | 1399_0 | Clustered           | 9 VC_1399_0   | 9   | 1      | 0          | 0      | 0 | 0 | 0 | 1 Ref      |
| MK765657 | Unassigned | Unassigned | Unassigned | 1283_0 | Clustered           | 26 VC_1283_0  | 26  | 0.5446 | 1          | 0.5446 | 0 | 0 | 0 | 1 Ref      |
| MK765658 | Unassigned | Unassigned | Unassigned | 1283_0 | Clustered           | 26 VC_1283_0  | 26  | 0.5446 | 1          | 0.5446 | 0 | 0 | 0 | 1 Ref      |
| MK765659 | Unassigned | Unassigned | Unassigned | 1325_0 | Clustered           | 7 VC_1325_0   | 7   | 0.9166 | 0.99999981 | 0.9166 | 0 | 0 | 0 | 1 Ref      |
| MK765660 | Unassigned | Unassigned | Unassigned | 1283_0 | Clustered           | 26 VC_1283_0  | 26  | 0.5446 | 1          | 0.5446 | 0 | 0 | 0 | 1 Ref      |
| MK765661 | Unassigned | Unassigned | Unassigned | 1211_0 | Clustered           | 25 VC_1211_0  | 25  | 1      | 1          | 1      | 0 | 0 | 0 | 1 Ref      |
| MK765662 | Unassigned | Unassigned | Unassigned | 1400_0 | Clustered           | 2 VC_1400_0   | 2   | 1      | 1          | 1      | 0 | 0 | 0 | 1 Ref      |
| MK765663 | Unassigned | Unassigned | Unassigned | 1399_0 | Clustered           | 9 VC_1399_0   | 9   | 1      | 0          | 0      | 0 | 0 | 0 | 1 Ref      |
| MK765664 | Unassigned | Unassigned | Unassigned | 1325_0 | Clustered           | 7 VC_1325_0   | 7   | 0.9166 | 0.99999981 | 0.9166 | 0 | 0 | 0 | 1 Ref      |
| MK765666 | Unassigned | Unassigned | Unassigned | 1283_0 | Clustered           | 26 VC_1283_0  | 26  | 0.5446 | 1          | 0.5446 | 0 | 0 | 0 | 1 Ref      |
| MK765667 | Unassigned | Unassigned | Unassigned | 1211_0 | Clustered           | 25 VC_1211_0  | 25  | 1      | 1          | 1      | 0 | 0 | 0 | 1 Ref      |
| MK765668 | Unassigned | Unassigned | Unassigned | 1399_0 | Clustered           | 9 VC_1399_0   | 9   | 1      | 0          | 0      | 0 | 0 | 0 | 1 Ref      |
| MK765669 | Unassigned | Unassigned | Unassigned | 1119_0 | Clustered           | 20 VC_1119_0  | 20  | 0.6751 | 0.99997892 | 0.6751 | 0 | 0 | 0 | 1 Ref      |
| MK770409 | Unassigned | Unassigned | Unassigned | 637_0  | Clustered           | 115 VC_637_0  | 115 | 0.731  | 1          | 0.731  | 0 | 0 | 0 | 0.8764 Ref |
| MK770410 | Unassigned | Unassigned | Unassigned | 191_31 | Clustered           | 2 VC_191_31   | 2   | 0.0057 | 0.92424379 | 0.0052 | 0 | 0 | 0 | 1 Ref      |
| MK770411 | Unassigned | Unassigned | Unassigned | 428_0  | Clustered           | 33 VC_428_0   | 33  | 0.9915 | 1          | 0.9915 | 0 | 0 | 0 | 1 Ref      |
| MK770412 | Unassigned | Unassigned | Unassigned | 328_0  | Clustered           | 11 VC_328_0   | 11  | 0.4707 | 1          | 0.4707 | 0 | 0 | 0 | 1 Ref      |
| MK770413 | Unassigned | Unassigned | Unassigned | 428_0  | Clustered           | 33 VC_428_0   | 33  | 0.9915 | 1          | 0.9915 | 0 | 0 | 0 | 1 Ref      |
| MK770414 | Unassigned | Unassigned | Unassigned | 28_1   | Clustered           | 53 VC_28_1    | 53  | 0.7164 | 1          | 0.7164 | 0 | 0 | 0 | 0.9325 Ref |
| MK770415 | Unassigned | Unassigned | Unassigned | 28_1   | Clustered           | 53 VC_28_1    | 53  | 0.7164 | 1          | 0.7164 | 0 | 0 | 0 | 0.9325 Ref |
| MK773491 | Unassigned | Unassigned | Unassigned | 164_0  | Clustered           | 3 VC_164_0    | 3   | 0.0298 | 0.82983726 | 0.0247 | 0 | 0 | 0 | 1 Ref      |
| MK774614 | Unassigned | Unassigned | Unassigned | 442_4  | Clustered           | 2 VC_442_4    | 2   | 0.0254 | 0.91859498 | 0.0233 | 0 | 0 | 0 | 1 Ref      |
| MK778457 | Unassigned | Unassigned | Unassigned | 585_1  | Clustered           | 3 VC_585_1    | 3   | 0.0313 | 0.99857668 | 0.0312 | 0 | 0 | 0 | 1 Ref      |
| MK779875 | Unassigned | Unassigned | Unassigned | 800_0  | Clustered           | 3 VC_800_0    | 3   | 0.4591 | 0.9984737  | 0.4584 | 0 | 0 | 0 | 1 Ref      |
| MK792752 | Unassigned | Unassigned | Unassigned | 739_0  | Clustered           | 26 VC_739_0   | 26  | 0.9571 | 1          | 0.9571 | 0 | 0 | 0 | 1 Ref      |
| MK795384 | Unassigned | Unassigned | Unassigned | 134_0  | Clustered           | 3 VC_134_0    | 3   | 0.0956 | 0.99858494 | 0.0955 | 0 | 0 | 0 | 1 Ref      |
| MK795385 | Unassigned | Unassigned | Unassigned | 823_0  | Clustered           | 124 VC_823_0  | 124 | 0.9492 | 1          | 0.9492 | 0 | 0 | 0 | 1 Ref      |
| MK796244 | Unassigned | Unassigned | Unassigned | 971_1  | Clustered           | 24 VC_971_1   | 24  | 0.7393 | 1          | 0.7393 | 0 | 0 | 0 | 0.8913 Ref |
| MK796797 | Unassigned | Unassigned | Unassigned | 807_0  | Clustered           | 17 VC_807_0   | 17  | 0.907  | 1          | 0.907  | 0 | 0 | 0 | 1 Ref      |
| MK797984 | Unassigned | Unassigned | Unassigned | 165_0  | Clustered           | 4 VC_165_0    | 4   | 0.2247 | 0.99998328 | 0.2247 | 0 | 0 | 0 | 1 Ref      |
| MK798142 | Unassigned | Unassigned | Unassigned | 123_0  | Clustered           | 23 VC_123_0   | 23  | 0.817  | 1          | 0.817  | 0 | 0 | 0 | 1 Ref      |
| MK798143 | Unassigned | Unassigned | Unassigned | 64_0   | Clustered           | 3 VC_64_0     | 3   | 0.5503 | 0.99785685 | 0.5491 | 0 | 0 | 0 | 1 Ref      |
| MK798144 | Unassigned | Unassigned | Unassigned | 64_0   | Clustered           | 3 VC_64_0     | 3   | 0.5503 | 0.99785685 | 0.5491 | 0 | 0 | 0 | 1 Ref      |



|          |            |            |            |        |                     |              |    |        |            |        |   |   |   |            |
|----------|------------|------------|------------|--------|---------------------|--------------|----|--------|------------|--------|---|---|---|------------|
| MK799650 | Unassigned | Unassigned | Unassigned | 77_0   | Clustered           | 20 VC_77_0   | 20 | 0.9657 | 1          | 0.9657 | 0 | 0 | 0 | 1 Ref      |
| MK799832 | Unassigned | Unassigned | Unassigned | 432_13 | Clustered/Singleton | 1 VC_432_13  | 1  | 0      | 1          | 0      | 0 | 0 | 0 | 1 Ref      |
| MK800154 | Unassigned | Unassigned | Unassigned | 108_0  | Clustered           | 33 VC_108_0  | 33 | 0.949  | 1          | 0.949  | 0 | 0 | 0 | 1 Ref      |
| MK801680 | Unassigned | Unassigned | Unassigned | 8_0    | Clustered           | 58 VC_8_0    | 58 | 0.8306 | 1          | 0.8306 | 0 | 0 | 0 | 0.9946 Ref |
| MK801681 | Unassigned | Unassigned | Unassigned | 8_0    | Clustered           | 58 VC_8_0    | 58 | 0.8306 | 1          | 0.8306 | 0 | 0 | 0 | 0.9946 Ref |
| MK801682 | Unassigned | Unassigned | Unassigned | 9_0    | Clustered           | 38 VC_9_0    | 38 | 0.4895 | 1          | 0.4895 | 0 | 0 | 0 | 1 Ref      |
| MK801683 | Unassigned | Unassigned | Unassigned | 9_0    | Clustered           | 38 VC_9_0    | 38 | 0.4895 | 1          | 0.4895 | 0 | 0 | 0 | 1 Ref      |
| MK801721 | Unassigned | Unassigned | Unassigned | 1176_0 | Clustered           | 41 VC_1176_0 | 41 | 0.9558 | 1          | 0.9558 | 0 | 0 | 0 | 0.9976 Ref |
| MK801722 | Unassigned | Unassigned | Unassigned | 1071_0 | Clustered           | 20 VC_1071_0 | 20 | 0.3268 | 1          | 0.3268 | 0 | 0 | 0 | 0.9842 Ref |
| MK801723 | Unassigned | Unassigned | Unassigned | 949_0  | Clustered           | 10 VC_949_0  | 10 | 0.5977 | 1          | 0.5977 | 0 | 0 | 0 | 1 Ref      |
| MK801724 | Unassigned | Unassigned | Unassigned | 1176_0 | Clustered           | 41 VC_1176_0 | 41 | 0.9558 | 1          | 0.9558 | 0 | 0 | 0 | 0.9976 Ref |
| MK801725 | Unassigned | Unassigned | Unassigned | 510_0  | Clustered           | 12 VC_510_0  | 12 | 0.3963 | 1          | 0.3963 | 0 | 0 | 0 | 0.9697 Ref |
| MK801726 | Unassigned | Unassigned | Unassigned | 551_0  | Clustered           | 16 VC_551_0  | 16 | 0.0915 | 1          | 0.0915 | 0 | 0 | 0 | 0.6667 Ref |
| MK801727 | Unassigned | Unassigned | Unassigned | 525_0  | Clustered           | 25 VC_525_0  | 25 | 0.4597 | 1          | 0.4597 | 0 | 0 | 0 | 1 Ref      |
| MK801728 | Unassigned | Unassigned | Unassigned | 868_0  | Clustered           | 25 VC_868_0  | 25 | 0.5791 | 1          | 0.5791 | 0 | 0 | 0 | 1 Ref      |
| MK801730 | Unassigned | Unassigned | Unassigned | 1344_0 | Clustered           | 78 VC_1344_0 | 78 | 0.9732 | 1          | 0.9732 | 0 | 0 | 0 | 1 Ref      |
| MK801731 | Unassigned | Unassigned | Unassigned | 1343_0 | Clustered           | 21 VC_1343_0 | 21 | 0.9843 | 1          | 0.9843 | 0 | 0 | 0 | 1 Ref      |
| MK801732 | Unassigned | Unassigned | Unassigned | 1343_0 | Clustered           | 21 VC_1343_0 | 21 | 0.9843 | 1          | 0.9843 | 0 | 0 | 0 | 1 Ref      |
| MK801733 | Unassigned | Unassigned | Unassigned | 868_0  | Clustered           | 25 VC_868_0  | 25 | 0.5791 | 1          | 0.5791 | 0 | 0 | 0 | 1 Ref      |
| MK801734 | Unassigned | Unassigned | Unassigned | 1175_0 | Clustered           | 22 VC_1175_0 | 22 | 0.4562 | 1          | 0.4562 | 0 | 0 | 0 | 1 Ref      |
| MK801735 | Unassigned | Unassigned | Unassigned | 216_0  | Clustered           | 4 VC_216_0   | 4  | 0.048  | 0.9999878  | 0.048  | 0 | 0 | 0 | 1 Ref      |
| MK803322 | Unassigned | Unassigned | Unassigned | 167_0  | Clustered           | 3 VC_167_0   | 3  | 0.6952 | 0.99826575 | 0.694  | 0 | 0 | 0 | 1 Ref      |
| MK804891 | Unassigned | Unassigned | Unassigned | 369_0  | Clustered           | 6 VC_369_0   | 6  | 0.5924 | 1          | 0.5924 | 0 | 0 | 0 | 1 Ref      |
| MK804892 | Unassigned | Unassigned | Unassigned | 369_0  | Clustered           | 6 VC_369_0   | 6  | 0.5924 | 1          | 0.5924 | 0 | 0 | 0 | 1 Ref      |
| MK804893 | Unassigned | Unassigned | Unassigned | 865_0  | Clustered           | 2 VC_865_0   | 2  | 0.0766 | 0.9388444  | 0.0719 | 0 | 0 | 0 | 1 Ref      |
| MK809530 | Unassigned | Unassigned | Unassigned | 191_32 | Clustered           | 12 VC_191_32 | 12 | 0.0683 | 1          | 0.0683 | 0 | 0 | 0 | 0.7576 Ref |
| MK813938 | Unassigned | Unassigned | Unassigned | 865_1  | Clustered/Singleton | 1 VC_865_1   | 1  | 0      | 1          | 0      | 0 | 0 | 0 | 1 Ref      |
| MK813939 | Unassigned | Unassigned | Unassigned | 865_0  | Clustered           | 2 VC_865_0   | 2  | 0.0766 | 0.9388444  | 0.0719 | 0 | 0 | 0 | 1 Ref      |
| MK813940 | Unassigned | Unassigned | Unassigned | 639_0  | Clustered           | 2 VC_639_0   | 2  | 0.2791 | 0.95526917 | 0.2666 | 0 | 0 | 0 | 1 Ref      |
| MK813941 | Unassigned | Unassigned | Unassigned | 865_2  | Clustered/Singleton | 1 VC_865_2   | 1  | 0      | 1          | 0      | 0 | 0 | 0 | 1 Ref      |
| MK814748 | Unassigned | Unassigned | Unassigned | 216_1  | Clustered/Singleton | 1 VC_216_1   | 1  | 0      | 1          | 0      | 0 | 0 | 0 | 1 Ref      |
| MK814749 | Unassigned | Unassigned | Unassigned | 1160_0 | Clustered           | 73 VC_1160_0 | 73 | 0.9835 | 1          | 0.9835 | 0 | 0 | 0 | 1 Ref      |
| MK814750 | Unassigned | Unassigned | Unassigned | 1184_0 | Clustered           | 5 VC_1184_0  | 5  | 0.6591 | 0.99999982 | 0.6591 | 0 | 0 | 0 | 1 Ref      |
| MK814751 | Unassigned | Unassigned | Unassigned | 508_0  | Clustered           | 32 VC_508_0  | 32 | 0.906  | 1          | 0.906  | 0 | 0 | 0 | 1 Ref      |
| MK814752 | Unassigned | Unassigned | Unassigned | 557_1  | Clustered           | 11 VC_557_1  | 11 | 0.4945 | 1          | 0.4945 | 0 | 0 | 0 | 0.7818 Ref |
| MK814753 | Unassigned | Unassigned | Unassigned | 1234_0 | Clustered           | 44 VC_1234_0 | 44 | 1      | 1          | 1      | 0 | 0 | 0 | 1 Ref      |
| MK814754 | Unassigned | Unassigned | Unassigned | 325_31 | Clustered/Singleton | 1 VC_325_31  | 1  | 0      | 1          | 0      | 0 | 0 | 0 | 1 Ref      |
| MK814755 | Unassigned | Unassigned | Unassigned | 525_0  | Clustered           | 25 VC_525_0  | 25 | 0.4597 | 1          | 0.4597 | 0 | 0 | 0 | 1 Ref      |
| MK814756 | Unassigned | Unassigned | Unassigned | 803_0  | Clustered           | 3 VC_803_0   | 3  | 0.0513 | 0.99857736 | 0.0512 | 0 | 0 | 0 | 0.6667 Ref |
| MK814757 | Unassigned | Unassigned | Unassigned | 1176_0 | Clustered           | 41 VC_1176_0 | 41 | 0.9558 | 1          | 0.9558 | 0 | 0 | 0 | 0.9976 Ref |
| MK814758 | Unassigned | Unassigned | Unassigned | 519_0  | Clustered           | 39 VC_519_0  | 39 | 0.8156 | 1          | 0.8156 | 0 | 0 | 0 | 1 Ref      |
| MK814759 | Unassigned | Unassigned | Unassigned | 1180_0 | Clustered           | 3 VC_1180_0  | 3  | 0.5161 | 0.9981786  | 0.5151 | 0 | 0 | 0 | 1 Ref      |
| MK814760 | Unassigned | Unassigned | Unassigned | 1098_0 | Clustered           | 4 VC_1098_0  | 4  | 0.5465 | 0.99996462 | 0.5465 | 0 | 0 | 0 | 1 Ref      |
| MK814761 | Unassigned | Unassigned | Unassigned | 1178_0 | Clustered           | 24 VC_1178_0 | 24 | 0.9524 | 1          | 0.9524 | 0 | 0 | 0 | 1 Ref      |
| MK814762 | Unassigned | Unassigned | Unassigned | 1163_0 | Clustered           | 28 VC_1163_0 | 28 | 0.4923 | 1          | 0.4923 | 0 | 0 | 0 | 1 Ref      |
| MK816297 | Unassigned | Unassigned | Unassigned | 796_0  | Clustered           | 5 VC_796_0   | 5  | 0.3352 | 0.99999997 | 0.3352 | 0 | 0 | 0 | 1 Ref      |
| MK817115 | Unassigned | Unassigned | Unassigned | 164_11 | Clustered           | 10 VC_164_11 | 10 | 0.1507 | 1          | 0.1507 | 0 | 0 | 0 | 0.9111 Ref |
| MK819239 | Unassigned | Unassigned | Unassigned | 295_0  | Clustered           | 2 VC_295_0   | 2  | 0.0336 | 0.94464231 | 0.0317 | 0 | 0 | 0 | 1 Ref      |
| MK820013 | Unassigned | Unassigned | Unassigned | 1027_0 | Clustered           | 20 VC_1027_0 | 20 | 0.7114 | 1          | 0.7114 | 0 | 0 | 0 | 1 Ref      |
| MK820638 | Unassigned | Unassigned | Unassigned | 325_23 | Clustered           | 17 VC_325_23 | 17 | 0.0716 | 1          | 0.0716 | 0 | 0 | 0 | 0.6397 Ref |
| MK820639 | Unassigned | Unassigned | Unassigned | 519_0  | Clustered           | 39 VC_519_0  | 39 | 0.8156 | 1          | 0.8156 | 0 | 0 | 0 | 1 Ref      |
| MK820640 | Unassigned | Unassigned | Unassigned | 950_0  | Clustered           | 38 VC_950_0  | 38 | 0.9443 | 1          | 0.9443 | 0 | 0 | 0 | 1 Ref      |
| MK820641 | Unassigned | Unassigned | Unassigned | 685_0  | Clustered           | 16 VC_685_0  | 16 | 0.2972 | 1          | 0.2972 | 0 | 0 | 0 | 0.9167 Ref |
| MK820642 | Unassigned | Unassigned | Unassigned | 525_0  | Clustered           | 25 VC_525_0  | 25 | 0.4597 | 1          | 0.4597 | 0 | 0 | 0 | 1 Ref      |
| MK837009 | Unassigned | Unassigned | Unassigned | 79_5   | Clustered           | 2 VC_79_5    | 2  | 0.0046 | 0.92781966 | 0.0043 | 0 | 0 | 0 | 1 Ref      |
| MK837010 | Unassigned | Unassigned | Unassigned | 79_6   | Clustered           | 11 VC_79_6   | 11 | 0.0528 | 1          | 0.0528 | 0 | 0 | 0 | 0.7455 Ref |
| MK837011 | Unassigned | Unassigned | Unassigned | 472_0  | Clustered           | 47 VC_472_0  | 47 | 0.9025 | 1          | 0.9025 | 0 | 0 | 0 | 1 Ref      |
| MK837012 | Unassigned | Unassigned | Unassigned | 472_0  | Clustered           | 47 VC_472_0  | 47 | 0.9025 | 1          | 0.9025 | 0 | 0 | 0 | 1 Ref      |
| MK838107 | Unassigned | Unassigned | Unassigned | 878_0  | Clustered           | 32 VC_878_0  | 32 | 0.9965 | 1          | 0.9965 | 0 | 0 | 0 | 1 Ref      |
| MK838108 | Unassigned | Unassigned | Unassigned | 878_0  | Clustered           | 32 VC_878_0  | 32 | 0.9965 | 1          | 0.9965 | 0 | 0 | 0 | 1 Ref      |
| MK838109 | Unassigned | Unassigned | Unassigned | 878_0  | Clustered           | 32 VC_878_0  | 32 | 0.9965 | 1          | 0.9965 | 0 | 0 | 0 | 1 Ref      |
| MK838110 | Unassigned | Unassigned | Unassigned | 878_0  | Clustered           | 32 VC_878_0  | 32 | 0.9965 | 1          | 0.9965 | 0 | 0 | 0 | 1 Ref      |
| MK838111 | Unassigned | Unassigned | Unassigned | 878_0  | Clustered           | 32 VC_878_0  | 32 | 0.9965 | 1          | 0.9965 | 0 | 0 | 0 | 1 Ref      |
| MK838113 | Unassigned | Unassigned | Unassigned | 597_0  | Clustered           | 6 VC_597_0   | 6  | 0.1801 | 1          | 0.1801 | 0 | 0 | 0 | 1 Ref      |
| MK838116 | Unassigned | Unassigned | Unassigned | 442_0  | Clustered           | 4 VC_442_0   | 4  | 0.0842 | 0.99996321 | 0.0842 | 0 | 0 | 0 | 1 Ref      |
| MK863032 | Unassigned | Unassigned | Unassigned | 779_3  | Clustered           | 7 VC_779_3   | 7  | 0.0766 | 1          | 0.0766 | 0 | 0 | 0 | 0.7143 Ref |
| MK864263 | Unassigned | Unassigned | Unassigned | 1176_0 | Clustered           | 41 VC_1176_0 | 41 | 0.9558 | 1          | 0.9558 | 0 | 0 | 0 | 0.9976 Ref |
| MK864264 | Unassigned | Unassigned | Unassigned | 1178_0 | Clustered           | 24 VC_1178_0 | 24 | 0.9524 | 1          | 0.9524 | 0 | 0 | 0 | 1 Ref      |
| MK864265 | Unassigned | Unassigned | Unassigned | 1178_0 | Clustered           | 24 VC_1178_0 | 24 | 0.9524 | 1          | 0.9524 | 0 | 0 | 0 | 1 Ref      |
| MK864266 | Unassigned | Unassigned | Unassigned | 1178_0 | Clustered           | 24 VC_1178_0 | 24 | 0.9524 | 1          | 0.9524 | 0 | 0 | 0 | 1 Ref      |
| MK864267 | Unassigned | Unassigned | Unassigned | 1178_0 | Clustered           | 24 VC_1178_0 | 24 | 0.9524 | 1          | 0.9524 | 0 | 0 | 0 | 1 Ref      |
| MK867354 | Unassigned | Unassigned | Unassigned | 432_5  | Clustered/Singleton | 1 VC_432_5   | 1  | 0      | 1          | 0      | 0 | 0 | 0 | 1 Ref      |
| MK867835 | Unassigned | Unassigned | Unassigned | 191_27 | Clustered/Singleton | 1 VC_191_27  | 1  | 0      | 1          | 0      | 0 | 0 | 0 | 1 Ref      |
| MK875791 | Unassigned | Unassigned | Unassigned | 919_0  | Clustered           | 39 VC_919_0  | 39 | 0.9069 | 1          | 0.9069 | 0 | 0 | 0 | 1 Ref      |
| MK875793 | Unassigned | Unassigned | Unassigned | 525_0  | Clustered           | 25 VC_525_0  | 25 | 0.4597 | 1          | 0.4597 | 0 | 0 | 0 | 1 Ref      |
| MK875795 | Unassigned | Unassigned | Unassigned | 919_0  | Clustered           | 39 VC_919_0  | 39 | 0.9069 | 1          | 0.9069 | 0 | 0 | 0 | 1 Ref      |
| MK875796 | Unassigned | Unassigned | Unassigned | 525_0  | Clustered           | 25 VC_525_0  | 25 | 0.4597 | 1          | 0.4597 | 0 | 0 | 0 | 1 Ref      |
| MK875797 | Unassigned | Unassigned | Unassigned | 1175_0 | Clustered           | 22 VC_1175_0 | 22 | 0.4562 | 1          | 0.4562 | 0 | 0 | 0 | 1 Ref      |
| MK875798 | Unassigned | Unassigned | Unassigned | 1352_0 | Clustered           | 31 VC_1352_0 | 31 | 0.849  | 1          | 0.849  | 0 | 0 | 0 | 1 Ref      |
| MK875799 | Unassigned | Unassigned | Unassigned | 517_0  | Clustered           | 18 VC_517_0  | 18 | 0.1599 | 1          | 0.1599 | 0 | 0 | 0 | 1 Ref      |
| MK875800 | Unassigned | Unassigned | Unassigned | 514_0  | Clustered           | 75 VC_514_0  | 75 | 0.9402 | 1          | 0.9402 | 0 | 0 | 0 | 1 Ref      |



|          |            |            |            |         |                     |              |     |        |            |        |   |   |   |        |       |
|----------|------------|------------|------------|---------|---------------------|--------------|-----|--------|------------|--------|---|---|---|--------|-------|
| MK878895 | Unassigned | Unassigned | Unassigned | 517_1   | Clustered           | 08 VC_517_1  | 108 | 0.8483 | 1          | 0.8483 | 0 | 0 | 0 | 0.9955 | Ref   |
| MK878896 | Unassigned | Unassigned | Unassigned | 1176_0  | Clustered           | 41 VC_1176_0 | 41  | 0.9558 |            | 0.9558 | 0 | 0 | 0 | 0.9976 | Ref   |
| MK878897 | Unassigned | Unassigned | Unassigned | 558_38  | Clustered           | 2 VC_558_38  | 2   | 0.0032 | 0.64328629 | 0.002  | 0 | 0 | 0 |        | 1 Ref |
| MK878898 | Unassigned | Unassigned | Unassigned | 525_0   | Clustered           | 25 VC_525_0  | 25  | 0.4597 | 1          | 0.4597 | 0 | 0 | 0 |        | 1 Ref |
| MK878899 | Unassigned | Unassigned | Unassigned | 1344_0  | Clustered           | 78 VC_1344_0 | 78  | 0.9732 | 1          | 0.9732 | 0 | 0 | 0 |        | 1 Ref |
| MK878900 | Unassigned | Unassigned | Unassigned | 889_0   | Clustered           | 16 VC_889_0  | 16  | 0.2969 | 1          | 0.2969 | 0 | 0 | 0 |        | 1 Ref |
| MK878901 | Unassigned | Unassigned | Unassigned | 1177_0  | Clustered           | 14 VC_1177_0 | 14  | 0.7847 | 1          | 0.7847 | 0 | 0 | 0 | 0.989  | Ref   |
| MK878903 | Unassigned | Unassigned | Unassigned | 866_1   | Clustered           | 20 VC_866_1  | 20  | 0.4814 | 1          | 0.4814 | 0 | 0 | 0 |        | 1 Ref |
| MK878904 | Unassigned | Unassigned | Unassigned | 1360_0  | Clustered           | 31 VC_1360_0 | 31  | 0.8837 | 1          | 0.8837 | 0 | 0 | 0 |        | 1 Ref |
| MK878905 | Unassigned | Unassigned | Unassigned | 517_1   | Clustered           | 108 VC_517_1 | 108 | 0.8483 | 1          | 0.8483 | 0 | 0 | 0 | 0.9955 | Ref   |
| MK880124 | Unassigned | Unassigned | Unassigned | 1206_0  | Clustered           | 8 VC_1206_0  | 8   | 0.1913 | 1          | 0.1913 | 0 | 0 | 0 |        | 1 Ref |
| MK883717 | Unassigned | Unassigned | Unassigned | 772_4   | Clustered           | 4 VC_772_4   | 4   | 0.0181 | 0.73018303 | 0.0132 | 0 | 0 | 0 |        | 1 Ref |
| MK883718 | Unassigned | Unassigned | Unassigned | 772_4   | Clustered           | 4 VC_772_4   | 4   | 0.0181 | 0.73018303 | 0.0132 | 0 | 0 | 0 |        | 1 Ref |
| MK886800 | Unassigned | Unassigned | Unassigned | 283_164 | Clustered           | 2 VC_283_164 | 2   | 0.003  | 0.93475788 | 0.0028 | 0 | 0 | 0 |        | 1 Ref |
| MK893987 | Unassigned | Unassigned | Unassigned | 667_2   | Clustered/Singleton | 1 VC_667_2   | 1   | 0      |            | 0      | 0 | 0 | 0 |        | 1 Ref |
| MK894432 | Unassigned | Unassigned | Unassigned | 1163_0  | Clustered           | 28 VC_1163_0 | 28  | 0.4923 | 1          | 0.4923 | 0 | 0 | 0 |        | 1 Ref |
| MK894433 | Unassigned | Unassigned | Unassigned | 223_0   | Clustered           | 38 VC_223_0  | 38  | 0.9095 | 1          | 0.9095 | 0 | 0 | 0 |        | 1 Ref |
| MK894434 | Unassigned | Unassigned | Unassigned | 1344_0  | Clustered           | 78 VC_1344_0 | 78  | 0.9732 | 1          | 0.9732 | 0 | 0 | 0 |        | 1 Ref |
| MK894435 | Unassigned | Unassigned | Unassigned | 1360_0  | Clustered           | 31 VC_1360_0 | 31  | 0.8837 | 1          | 0.8837 | 0 | 0 | 0 |        | 1 Ref |
| MK894436 | Unassigned | Unassigned | Unassigned | 1098_0  | Clustered           | 4 VC_1098_0  | 4   | 0.5465 | 0.99996462 | 0.5465 | 0 | 0 | 0 |        | 1 Ref |
| MK894438 | Unassigned | Unassigned | Unassigned | 1360_0  | Clustered           | 31 VC_1360_0 | 31  | 0.8837 | 1          | 0.8837 | 0 | 0 | 0 |        | 1 Ref |
| MK895508 | Unassigned | Unassigned | Unassigned | 971_1   | Clustered           | 24 VC_971_1  | 24  | 0.7393 | 1          | 0.7393 | 0 | 0 | 0 | 0.8913 | Ref   |
| MK903033 | Unassigned | Unassigned | Unassigned | 96_0    | Clustered           | 30 VC_96_0   | 30  | 0.718  | 1          | 0.718  | 0 | 0 | 0 |        | 1 Ref |
| MK903277 | Unassigned | Unassigned | Unassigned | 451_0   | Clustered           | 80 VC_451_0  | 80  | 0.9991 | 1          | 0.9991 | 0 | 0 | 0 |        | 1 Ref |
| MK903278 | Unassigned | Unassigned | Unassigned | 74_0    | Clustered           | 15 VC_74_0   | 15  | 0.5204 | 1          | 0.5204 | 0 | 0 | 0 |        | 1 Ref |
| MK903279 | Unassigned | Unassigned | Unassigned | 451_0   | Clustered           | 80 VC_451_0  | 80  | 0.9991 | 1          | 0.9991 | 0 | 0 | 0 |        | 1 Ref |
| MK903281 | Unassigned | Unassigned | Unassigned | 451_0   | Clustered           | 80 VC_451_0  | 80  | 0.9991 | 1          | 0.9991 | 0 | 0 | 0 |        | 1 Ref |
| MK903282 | Unassigned | Unassigned | Unassigned | 618_0   | Clustered           | 13 VC_618_0  | 13  | 0.6252 | 1          | 0.6252 | 0 | 0 | 0 |        | 1 Ref |
| MK903278 | Unassigned | Unassigned | Unassigned | 823_0   | Clustered           | 124 VC_823_0 | 124 | 0.9492 | 1          | 0.9492 | 0 | 0 | 0 |        | 1 Ref |
| MK907226 | Unassigned | Unassigned | Unassigned | 456_0   | Clustered           | 62 VC_456_0  | 62  | 0.9026 | 1          | 0.9026 | 0 | 0 | 0 |        | 1 Ref |
| MK907227 | Unassigned | Unassigned | Unassigned | 456_0   | Clustered           | 62 VC_456_0  | 62  | 0.9026 | 1          | 0.9026 | 0 | 0 | 0 |        | 1 Ref |
| MK907228 | Unassigned | Unassigned | Unassigned | 456_0   | Clustered           | 62 VC_456_0  | 62  | 0.9026 | 1          | 0.9026 | 0 | 0 | 0 |        | 1 Ref |
| MK907229 | Unassigned | Unassigned | Unassigned | 456_0   | Clustered           | 62 VC_456_0  | 62  | 0.9026 | 1          | 0.9026 | 0 | 0 | 0 |        | 1 Ref |
| MK907230 | Unassigned | Unassigned | Unassigned | 456_0   | Clustered           | 62 VC_456_0  | 62  | 0.9026 | 1          | 0.9026 | 0 | 0 | 0 |        | 1 Ref |
| MK907231 | Unassigned | Unassigned | Unassigned | 456_0   | Clustered           | 62 VC_456_0  | 62  | 0.9026 | 1          | 0.9026 | 0 | 0 | 0 |        | 1 Ref |
| MK907232 | Unassigned | Unassigned | Unassigned | 456_0   | Clustered           | 62 VC_456_0  | 62  | 0.9026 | 1          | 0.9026 | 0 | 0 | 0 |        | 1 Ref |
| MK907233 | Unassigned | Unassigned | Unassigned | 456_0   | Clustered           | 62 VC_456_0  | 62  | 0.9026 | 1          | 0.9026 | 0 | 0 | 0 |        | 1 Ref |
| MK907234 | Unassigned | Unassigned | Unassigned | 456_0   | Clustered           | 62 VC_456_0  | 62  | 0.9026 | 1          | 0.9026 | 0 | 0 | 0 |        | 1 Ref |
| MK907235 | Unassigned | Unassigned | Unassigned | 456_0   | Clustered           | 62 VC_456_0  | 62  | 0.9026 | 1          | 0.9026 | 0 | 0 | 0 |        | 1 Ref |
| MK907236 | Unassigned | Unassigned | Unassigned | 228_0   | Clustered           | 60 VC_228_0  | 60  | 0.942  | 1          | 0.942  | 0 | 0 | 0 |        | 1 Ref |
| MK907237 | Unassigned | Unassigned | Unassigned | 228_0   | Clustered           | 60 VC_228_0  | 60  | 0.942  | 1          | 0.942  | 0 | 0 | 0 |        | 1 Ref |
| MK907238 | Unassigned | Unassigned | Unassigned | 228_0   | Clustered           | 60 VC_228_0  | 60  | 0.942  | 1          | 0.942  | 0 | 0 | 0 |        | 1 Ref |
| MK907239 | Unassigned | Unassigned | Unassigned | 228_0   | Clustered           | 60 VC_228_0  | 60  | 0.942  | 1          | 0.942  | 0 | 0 | 0 |        | 1 Ref |
| MK907240 | Unassigned | Unassigned | Unassigned | 456_0   | Clustered           | 62 VC_456_0  | 62  | 0.9026 | 1          | 0.9026 | 0 | 0 | 0 |        | 1 Ref |
| MK907241 | Unassigned | Unassigned | Unassigned | 456_0   | Clustered           | 62 VC_456_0  | 62  | 0.9026 | 1          | 0.9026 | 0 | 0 | 0 |        | 1 Ref |
| MK907242 | Unassigned | Unassigned | Unassigned | 456_0   | Clustered           | 62 VC_456_0  | 62  | 0.9026 | 1          | 0.9026 | 0 | 0 | 0 |        | 1 Ref |
| MK907243 | Unassigned | Unassigned | Unassigned | 456_0   | Clustered           | 62 VC_456_0  | 62  | 0.9026 | 1          | 0.9026 | 0 | 0 | 0 |        | 1 Ref |
| MK907244 | Unassigned | Unassigned | Unassigned | 456_0   | Clustered           | 62 VC_456_0  | 62  | 0.9026 | 1          | 0.9026 | 0 | 0 | 0 |        | 1 Ref |
| MK907245 | Unassigned | Unassigned | Unassigned | 456_0   | Clustered           | 62 VC_456_0  | 62  | 0.9026 | 1          | 0.9026 | 0 | 0 | 0 |        | 1 Ref |
| MK907246 | Unassigned | Unassigned | Unassigned | 456_0   | Clustered           | 62 VC_456_0  | 62  | 0.9026 | 1          | 0.9026 | 0 | 0 | 0 |        | 1 Ref |
| MK907247 | Unassigned | Unassigned | Unassigned | 456_0   | Clustered           | 62 VC_456_0  | 62  | 0.9026 | 1          | 0.9026 | 0 | 0 | 0 |        | 1 Ref |
| MK907248 | Unassigned | Unassigned | Unassigned | 456_0   | Clustered           | 62 VC_456_0  | 62  | 0.9026 | 1          | 0.9026 | 0 | 0 | 0 |        | 1 Ref |
| MK907249 | Unassigned | Unassigned | Unassigned | 456_0   | Clustered           | 62 VC_456_0  | 62  | 0.9026 | 1          | 0.9026 | 0 | 0 | 0 |        | 1 Ref |
| MK907250 | Unassigned | Unassigned | Unassigned | 456_0   | Clustered           | 62 VC_456_0  | 62  | 0.9026 | 1          | 0.9026 | 0 | 0 | 0 |        | 1 Ref |
| MK907251 | Unassigned | Unassigned | Unassigned | 456_0   | Clustered           | 62 VC_456_0  | 62  | 0.9026 | 1          | 0.9026 | 0 | 0 | 0 |        | 1 Ref |
| MK907252 | Unassigned | Unassigned | Unassigned | 456_0   | Clustered           | 62 VC_456_0  | 62  | 0.9026 | 1          | 0.9026 | 0 | 0 | 0 |        | 1 Ref |
| MK907253 | Unassigned | Unassigned | Unassigned | 456_0   | Clustered           | 62 VC_456_0  | 62  | 0.9026 | 1          | 0.9026 | 0 | 0 | 0 |        | 1 Ref |
| MK907254 | Unassigned | Unassigned | Unassigned | 456_0   | Clustered           | 62 VC_456_0  | 62  | 0.9026 | 1          | 0.9026 | 0 | 0 | 0 |        | 1 Ref |
| MK907255 | Unassigned | Unassigned | Unassigned | 456_0   | Clustered           | 62 VC_456_0  | 62  | 0.9026 | 1          | 0.9026 | 0 | 0 | 0 |        | 1 Ref |
| MK907256 | Unassigned | Unassigned | Unassigned | 456_0   | Clustered           | 62 VC_456_0  | 62  | 0.9026 | 1          | 0.9026 | 0 | 0 | 0 |        | 1 Ref |
| MK907257 | Unassigned | Unassigned | Unassigned | 456_0   | Clustered           | 62 VC_456_0  | 62  | 0.9026 | 1          | 0.9026 | 0 | 0 | 0 |        | 1 Ref |
| MK907258 | Unassigned | Unassigned | Unassigned | 456_0   | Clustered           | 62 VC_456_0  | 62  | 0.9026 | 1          | 0.9026 | 0 | 0 | 0 |        | 1 Ref |
| MK907259 | Unassigned | Unassigned | Unassigned | 456_0   | Clustered           | 62 VC_456_0  | 62  | 0.9026 | 1          | 0.9026 | 0 | 0 | 0 |        | 1 Ref |
| MK907260 | Unassigned | Unassigned | Unassigned | 456_0   | Clustered           | 62 VC_456_0  | 62  | 0.9026 | 1          | 0.9026 | 0 | 0 | 0 |        | 1 Ref |
| MK907261 | Unassigned | Unassigned | Unassigned | 456_0   | Clustered           | 62 VC_456_0  | 62  | 0.9026 | 1          | 0.9026 | 0 | 0 | 0 |        | 1 Ref |
| MK907262 | Unassigned | Unassigned | Unassigned | 456_0   | Clustered           | 62 VC_456_0  | 62  | 0.9026 | 1          | 0.9026 | 0 | 0 | 0 |        | 1 Ref |
| MK907263 | Unassigned | Unassigned | Unassigned | 456_0   | Clustered           | 62 VC_456_0  | 62  | 0.9026 | 1          | 0.9026 | 0 | 0 | 0 |        | 1 Ref |
| MK907264 | Unassigned | Unassigned | Unassigned | 456_0   | Clustered           | 62 VC_456_0  | 62  | 0.9026 | 1          | 0.9026 | 0 | 0 | 0 |        | 1 Ref |
| MK907265 | Unassigned | Unassigned | Unassigned | 456_0   | Clustered           | 62 VC_456_0  | 62  | 0.9026 | 1          | 0.9026 | 0 | 0 | 0 |        | 1 Ref |
| MK907266 | Unassigned | Unassigned | Unassigned | 456_0   | Clustered           | 62 VC_456_0  | 62  | 0.9026 | 1          | 0.9026 | 0 | 0 | 0 |        | 1 Ref |
| MK907267 | Unassigned | Unassigned | Unassigned | 191_13  | Clustered           | 5 VC_191_13  | 5   | 0.0233 | 0.99999927 | 0.0233 | 0 | 0 | 0 |        | 1 Ref |
| MK907268 | Unassigned | Unassigned | Unassigned | 191_13  | Clustered           | 5 VC_191_13  | 5   | 0.0233 | 0.99999927 | 0.0233 | 0 | 0 | 0 |        | 1 Ref |
| MK907269 | Unassigned | Unassigned | Unassigned | 191_13  | Clustered           | 5 VC_191_13  | 5   | 0.0233 | 0.99999927 | 0.0233 | 0 | 0 | 0 |        | 1 Ref |
| MK907270 | Unassigned | Unassigned | Unassigned | 191_13  | Clustered           | 5 VC_191_13  | 5   | 0.0233 | 0.99999927 | 0.0233 | 0 | 0 | 0 |        | 1 Ref |
| MK907271 | Unassigned | Unassigned | Unassigned | 191_13  | Clustered           | 5 VC_191_13  | 5   | 0.0233 | 0.99999927 | 0.0233 | 0 | 0 | 0 |        | 1 Ref |
| MK907272 | Unassigned | Unassigned | Unassigned | 456_0   | Clustered           | 62 VC_456_0  | 62  | 0.9026 | 1          | 0.9026 | 0 | 0 | 0 |        | 1 Ref |
| MK907273 | Unassigned | Unassigned | Unassigned | 456_0   | Clustered           | 62 VC_456_0  | 62  | 0.9026 | 1          | 0.9026 | 0 | 0 | 0 |        | 1 Ref |
| MK907274 | Unassigned | Unassigned | Unassigned | 456_0   | Clustered           | 62 VC_456_0  | 62  | 0.9026 | 1          | 0.9026 | 0 | 0 | 0 |        | 1 Ref |
| MK907275 | Unassigned | Unassigned | Unassigned | 456_0   | Clustered           | 62 VC_456_0  | 62  | 0.9026 | 1          | 0.9026 | 0 | 0 | 0 |        | 1 Ref |
| MK907276 | Unassigned | Unassigned | Unassigned | 456_0   | Clustered           | 62 VC_456_0  | 62  | 0.9026 | 1          | 0.9026 | 0 | 0 | 0 |        | 1 Ref |
| MK907285 | Unassigned | Unassigned | Unassigned | 386_0   | Clustered           | 49 VC_386_0  | 49  | 0.7941 | 1          | 0.7941 | 0 | 0 | 0 |        | 1 Ref |



|          |            |            |            |         |                     |              |    |        |            |        |   |   |   |        |     |
|----------|------------|------------|------------|---------|---------------------|--------------|----|--------|------------|--------|---|---|---|--------|-----|
| MK907780 | Unassigned | Unassigned | Unassigned | 971_1   | Clustered           | 24 VC_971_1  | 24 | 0.7393 | 1          | 0.7393 | 0 | 0 | 0 | 0.8913 | Ref |
| MK919469 | Unassigned | Unassigned | Unassigned | 525_1   | Clustered           | 5 VC_525_1   | 5  | 0.0485 | 0.99999947 | 0.0485 | 0 | 0 | 0 | 0.9    | Ref |
| MK919470 | Unassigned | Unassigned | Unassigned | 1176_0  | Clustered           | 41 VC_1176_0 | 41 | 0.9558 | 1          | 0.9558 | 0 | 0 | 0 | 0.9976 | Ref |
| MK919471 | Unassigned | Unassigned | Unassigned | 1240_0  | Clustered           | 82 VC_1240_0 | 82 | 0.7945 | 1          | 0.7945 | 0 | 0 | 0 | 1      | Ref |
| MK919472 | Unassigned | Unassigned | Unassigned | 216_6   | Clustered           | 42 VC_216_6  | 42 | 0.473  | 1          | 0.473  | 0 | 0 | 0 | 0.8351 | Ref |
| MK919473 | Unassigned | Unassigned | Unassigned | 802_0   | Clustered           | 17 VC_802_0  | 17 | 0.8025 | 1          | 0.8025 | 0 | 0 | 0 | 1      | Ref |
| MK919474 | Unassigned | Unassigned | Unassigned | 856_1   | Clustered           | 13 VC_856_1  | 13 | 0.5848 | 1          | 0.5848 | 0 | 0 | 0 | 1      | Ref |
| MK919475 | Unassigned | Unassigned | Unassigned | 761_0   | Clustered           | 67 VC_761_0  | 67 | 0.8947 | 1          | 0.8947 | 0 | 0 | 0 | 1      | Ref |
| MK919476 | Unassigned | Unassigned | Unassigned | 1160_0  | Clustered           | 73 VC_1160_0 | 73 | 0.9835 | 1          | 0.9835 | 0 | 0 | 0 | 1      | Ref |
| MK919477 | Unassigned | Unassigned | Unassigned | 866_1   | Clustered           | 20 VC_866_1  | 20 | 0.4814 | 1          | 0.4814 | 0 | 0 | 0 | 1      | Ref |
| MK919478 | Unassigned | Unassigned | Unassigned | 1183_0  | Clustered           | 6 VC_1183_0  | 6  | 0.995  | 0.99996974 | 0.995  | 0 | 0 | 0 | 1      | Ref |
| MK919479 | Unassigned | Unassigned | Unassigned | 1073_0  | Clustered           | 24 VC_1073_0 | 24 | 0.8388 | 1          | 0.8388 | 0 | 0 | 0 | 1      | Ref |
| MK919480 | Unassigned | Unassigned | Unassigned | 519_0   | Clustered           | 39 VC_519_0  | 39 | 0.8156 | 1          | 0.8156 | 0 | 0 | 0 | 1      | Ref |
| MK919481 | Unassigned | Unassigned | Unassigned | 866_1   | Clustered           | 20 VC_866_1  | 20 | 0.4814 | 1          | 0.4814 | 0 | 0 | 0 | 1      | Ref |
| MK919482 | Unassigned | Unassigned | Unassigned | 810_0   | Clustered           | 18 VC_810_0  | 18 | 0.9121 | 1          | 0.9121 | 0 | 0 | 0 | 1      | Ref |
| MK919483 | Unassigned | Unassigned | Unassigned | 525_0   | Clustered           | 25 VC_525_0  | 25 | 0.4597 | 1          | 0.4597 | 0 | 0 | 0 | 1      | Ref |
| MK919484 | Unassigned | Unassigned | Unassigned | 1160_0  | Clustered           | 73 VC_1160_0 | 73 | 0.9835 | 1          | 0.9835 | 0 | 0 | 0 | 1      | Ref |
| MK922546 | Unassigned | Unassigned | Unassigned | 96_0    | Clustered           | 30 VC_96_0   | 30 | 0.718  | 1          | 0.718  | 0 | 0 | 0 | 1      | Ref |
| MK922547 | Unassigned | Unassigned | Unassigned | 96_0    | Clustered           | 30 VC_96_0   | 30 | 0.718  | 1          | 0.718  | 0 | 0 | 0 | 1      | Ref |
| MK922548 | Unassigned | Unassigned | Unassigned | 96_0    | Clustered           | 30 VC_96_0   | 30 | 0.718  | 1          | 0.718  | 0 | 0 | 0 | 1      | Ref |
| MK929790 | Unassigned | Unassigned | Unassigned | 1407_0  | Clustered           | 2 VC_1407_0  | 2  | 0.8176 | 0.81445332 | 0.6659 | 0 | 0 | 0 | 1      | Ref |
| MK931297 | Unassigned | Unassigned | Unassigned | 779_0   | Clustered           | 37 VC_779_0  | 37 | 0.5682 | 1          | 0.5682 | 0 | 0 | 0 | 1      | Ref |
| MK931438 | Unassigned | Unassigned | Unassigned | 638_0   | Clustered           | 45 VC_638_0  | 45 | 0.7741 | 1          | 0.7741 | 0 | 0 | 0 | 1      | Ref |
| MK931439 | Unassigned | Unassigned | Unassigned | 638_0   | Clustered           | 45 VC_638_0  | 45 | 0.7741 | 1          | 0.7741 | 0 | 0 | 0 | 1      | Ref |
| MK931440 | Unassigned | Unassigned | Unassigned | 638_0   | Clustered           | 45 VC_638_0  | 45 | 0.7741 | 1          | 0.7741 | 0 | 0 | 0 | 1      | Ref |
| MK931441 | Unassigned | Unassigned | Unassigned | 638_0   | Clustered           | 45 VC_638_0  | 45 | 0.7741 | 1          | 0.7741 | 0 | 0 | 0 | 1      | Ref |
| MK931442 | Unassigned | Unassigned | Unassigned | 938_0   | Clustered           | 99 VC_938_0  | 99 | 0.9119 | 1          | 0.9119 | 0 | 0 | 0 | 0.9928 | Ref |
| MK931443 | Unassigned | Unassigned | Unassigned | 938_0   | Clustered           | 99 VC_938_0  | 99 | 0.9119 | 1          | 0.9119 | 0 | 0 | 0 | 0.9928 | Ref |
| MK931444 | Unassigned | Unassigned | Unassigned | 938_0   | Clustered           | 99 VC_938_0  | 99 | 0.9119 | 1          | 0.9119 | 0 | 0 | 0 | 0.9928 | Ref |
| MK931445 | Unassigned | Unassigned | Unassigned | 938_0   | Clustered           | 99 VC_938_0  | 99 | 0.9119 | 1          | 0.9119 | 0 | 0 | 0 | 0.9928 | Ref |
| MK931446 | Unassigned | Unassigned | Unassigned | 637_1   | Clustered           | 27 VC_637_1  | 27 | 0.2578 | 1          | 0.2578 | 0 | 0 | 0 | 0.9858 | Ref |
| MK932884 | Unassigned | Unassigned | Unassigned | 851_0   | Clustered           | 2 VC_851_0   | 2  | 0.4472 | 0.9410422  | 0.4209 | 0 | 0 | 0 | 1      | Ref |
| MK934841 | Unassigned | Unassigned | Unassigned | 251_0   | Clustered           | 22 VC_251_0  | 22 | 0.6508 | 1          | 0.6508 | 0 | 0 | 0 | 1      | Ref |
| MK936475 | Unassigned | Unassigned | Unassigned | 96_0    | Clustered           | 30 VC_96_0   | 30 | 0.718  | 1          | 0.718  | 0 | 0 | 0 | 1      | Ref |
| MK936476 | Unassigned | Unassigned | Unassigned | 96_0    | Clustered           | 30 VC_96_0   | 30 | 0.718  | 1          | 0.718  | 0 | 0 | 0 | 1      | Ref |
| MK937591 | Unassigned | Unassigned | Unassigned | 1349_0  | Clustered           | 7 VC_1349_0  | 7  | 0.2495 | 1          | 0.2495 | 0 | 0 | 0 | 1      | Ref |
| MK937593 | Unassigned | Unassigned | Unassigned | 551_0   | Clustered           | 16 VC_551_0  | 16 | 0.0915 | 1          | 0.0915 | 0 | 0 | 0 | 0.6667 | Ref |
| MK937594 | Unassigned | Unassigned | Unassigned | 1093_0  | Clustered           | 40 VC_1093_0 | 40 | 0.8754 | 1          | 0.8754 | 0 | 0 | 0 | 1      | Ref |
| MK937595 | Unassigned | Unassigned | Unassigned | 374_0   | Clustered           | 2 VC_374_0   | 2  | 0.1258 | 0.95578317 | 0.1203 | 0 | 0 | 0 | 1      | Ref |
| MK937596 | Unassigned | Unassigned | Unassigned | 856_1   | Clustered           | 13 VC_856_1  | 13 | 0.5848 | 1          | 0.5848 | 0 | 0 | 0 | 1      | Ref |
| MK937597 | Unassigned | Unassigned | Unassigned | 557_0   | Clustered           | 3 VC_557_0   | 3  | 0.0814 | 0.99853279 | 0.0812 | 0 | 0 | 0 | 0.6667 | Ref |
| MK937598 | Unassigned | Unassigned | Unassigned | 1234_0  | Clustered           | 44 VC_1234_0 | 44 | 1      | 1          | 1      | 0 | 0 | 0 | 1      | Ref |
| MK937599 | Unassigned | Unassigned | Unassigned | 1177_0  | Clustered           | 14 VC_1177_0 | 14 | 0.7847 | 1          | 0.7847 | 0 | 0 | 0 | 0.989  | Ref |
| MK937600 | Unassigned | Unassigned | Unassigned | 888_0   | Clustered           | 28 VC_888_0  | 28 | 0.5497 | 1          | 0.5497 | 0 | 0 | 0 | 1      | Ref |
| MK937601 | Unassigned | Unassigned | Unassigned | 1093_0  | Clustered           | 40 VC_1093_0 | 40 | 0.8754 | 1          | 0.8754 | 0 | 0 | 0 | 1      | Ref |
| MK937602 | Unassigned | Unassigned | Unassigned | 1163_0  | Clustered           | 28 VC_1163_0 | 28 | 0.4923 | 1          | 0.4923 | 0 | 0 | 0 | 1      | Ref |
| MK937603 | Unassigned | Unassigned | Unassigned | 1178_0  | Clustered           | 24 VC_1178_0 | 24 | 0.9524 | 1          | 0.9524 | 0 | 0 | 0 | 1      | Ref |
| MK937604 | Unassigned | Unassigned | Unassigned | 519_0   | Clustered           | 39 VC_519_0  | 39 | 0.8156 | 1          | 0.8156 | 0 | 0 | 0 | 1      | Ref |
| MK937606 | Unassigned | Unassigned | Unassigned | 1349_0  | Clustered           | 7 VC_1349_0  | 7  | 0.2495 | 1          | 0.2495 | 0 | 0 | 0 | 1      | Ref |
| MK937607 | Unassigned | Unassigned | Unassigned | 1095_0  | Clustered           | 16 VC_1095_0 | 16 | 0.458  | 1          | 0.458  | 0 | 0 | 0 | 1      | Ref |
| MK937608 | Unassigned | Unassigned | Unassigned | 1349_0  | Clustered           | 7 VC_1349_0  | 7  | 0.2495 | 1          | 0.2495 | 0 | 0 | 0 | 1      | Ref |
| MK937610 | Unassigned | Unassigned | Unassigned | 1234_0  | Clustered           | 44 VC_1234_0 | 44 | 1      | 1          | 1      | 0 | 0 | 0 | 1      | Ref |
| MK937611 | Unassigned | Unassigned | Unassigned | 1095_0  | Clustered           | 16 VC_1095_0 | 16 | 0.458  | 1          | 0.458  | 0 | 0 | 0 | 1      | Ref |
| MK937612 | Unassigned | Unassigned | Unassigned | 763_1   | Clustered           | 9 VC_763_1   | 9  | 0.3706 | 1          | 0.3706 | 0 | 0 | 0 | 1      | Ref |
| MK937613 | Unassigned | Unassigned | Unassigned | 1199_0  | Clustered           | 8 VC_1199_0  | 8  | 0.7928 | 1          | 0.7928 | 0 | 0 | 0 | 1      | Ref |
| MK940809 | Unassigned | Unassigned | Unassigned | 8_0     | Clustered           | 58 VC_8_0    | 58 | 0.8306 | 1          | 0.8306 | 0 | 0 | 0 | 0.9946 | Ref |
| MK947458 | Unassigned | Unassigned | Unassigned | 191_16  | Clustered           | 12 VC_191_16 | 12 | 0.0643 | 1          | 0.0643 | 0 | 0 | 0 | 0.9394 | Ref |
| MK947459 | Unassigned | Unassigned | Unassigned | 191_17  | Clustered           | 4 VC_191_17  | 4  | 0.0166 | 0.99930063 | 0.0166 | 0 | 0 | 0 | 0.8333 | Ref |
| MK947460 | Unassigned | Unassigned | Unassigned | 461_0   | Clustered           | 96 VC_461_0  | 96 | 0.9307 | 1          | 0.9307 | 0 | 0 | 0 | 0.9575 | Ref |
| MK962626 | Unassigned | Unassigned | Unassigned | 779_1   | Clustered           | 11 VC_779_1  | 11 | 0.1587 | 1          | 0.1587 | 0 | 0 | 0 | 1      | Ref |
| MK962627 | Unassigned | Unassigned | Unassigned | 171_0   | Clustered           | 8 VC_171_0   | 8  | 0.5884 | 1          | 0.5884 | 0 | 0 | 0 | 1      | Ref |
| MK962628 | Unassigned | Unassigned | Unassigned | 157_0   | Clustered           | 3 VC_157_0   | 3  | 0.3732 | 0.99808097 | 0.3725 | 0 | 0 | 0 | 1      | Ref |
| MK962629 | Unassigned | Unassigned | Unassigned | 779_1   | Clustered           | 11 VC_779_1  | 11 | 0.1587 | 1          | 0.1587 | 0 | 0 | 0 | 1      | Ref |
| MK962630 | Unassigned | Unassigned | Unassigned | 779_1   | Clustered           | 11 VC_779_1  | 11 | 0.1587 | 1          | 0.1587 | 0 | 0 | 0 | 1      | Ref |
| MK962631 | Unassigned | Unassigned | Unassigned | 779_1   | Clustered           | 11 VC_779_1  | 11 | 0.1587 | 1          | 0.1587 | 0 | 0 | 0 | 1      | Ref |
| MK962632 | Unassigned | Unassigned | Unassigned | 779_1   | Clustered           | 11 VC_779_1  | 11 | 0.1587 | 1          | 0.1587 | 0 | 0 | 0 | 1      | Ref |
| MK962633 | Unassigned | Unassigned | Unassigned | 171_0   | Clustered           | 8 VC_171_0   | 8  | 0.5884 | 1          | 0.5884 | 0 | 0 | 0 | 1      | Ref |
| MK962634 | Unassigned | Unassigned | Unassigned | 171_0   | Clustered           | 8 VC_171_0   | 8  | 0.5884 | 1          | 0.5884 | 0 | 0 | 0 | 1      | Ref |
| MK962635 | Unassigned | Unassigned | Unassigned | 751_0   | Clustered           | 4 VC_751_0   | 4  | 0.1763 | 0.99998526 | 0.1763 | 0 | 0 | 0 | 1      | Ref |
| MK962636 | Unassigned | Unassigned | Unassigned | 751_0   | Clustered           | 4 VC_751_0   | 4  | 0.1763 | 0.99998526 | 0.1763 | 0 | 0 | 0 | 1      | Ref |
| MK962637 | Unassigned | Unassigned | Unassigned | 751_0   | Clustered           | 4 VC_751_0   | 4  | 0.1763 | 0.99998526 | 0.1763 | 0 | 0 | 0 | 1      | Ref |
| MK962638 | Unassigned | Unassigned | Unassigned | 157_0   | Clustered           | 3 VC_157_0   | 3  | 0.3732 | 0.99808097 | 0.3725 | 0 | 0 | 0 | 1      | Ref |
| MK962639 | Unassigned | Unassigned | Unassigned | 779_1   | Clustered           | 11 VC_779_1  | 11 | 0.1587 | 1          | 0.1587 | 0 | 0 | 0 | 1      | Ref |
| MK962640 | Unassigned | Unassigned | Unassigned | 157_0   | Clustered           | 3 VC_157_0   | 3  | 0.3732 | 0.99808097 | 0.3725 | 0 | 0 | 0 | 1      | Ref |
| MK962641 | Unassigned | Unassigned | Unassigned | 779_1   | Clustered           | 11 VC_779_1  | 11 | 0.1587 | 1          | 0.1587 | 0 | 0 | 0 | 1      | Ref |
| MK962749 | Unassigned | Unassigned | Unassigned | 772_1   | Clustered           | 2 VC_772_1   | 2  | 0.006  | 0.57682361 | 0.0034 | 0 | 0 | 0 | 1      | Ref |
| MK962750 | Unassigned | Unassigned | Unassigned | 283_169 | Clustered/Singleton | 1 VC_283_169 | 1  | 0      | 1          | 0      | 0 | 0 | 0 | 1      | Ref |
| MK962751 | Unassigned | Unassigned | Unassigned | 942_0   | Clustered           | 36 VC_942_0  | 36 | 0.7848 | 1          | 0.7848 | 0 | 0 | 0 | 1      | Ref |
| MK962752 | Unassigned | Unassigned | Unassigned | 283_120 | Clustered/Singleton | 1 VC_283_120 | 1  | 0      | 1          | 0      | 0 | 0 | 0 | 1      | Ref |
| MK962753 | Unassigned | Unassigned | Unassigned | 590_0   | Clustered           | 27 VC_590_0  | 27 | 0.9947 | 1          | 0.9947 | 0 | 0 | 0 | 1      | Ref |
| MK962754 | Unassigned | Unassigned | Unassigned | 286_1   | Clustered           | 21 VC_286_1  | 21 | 0.1696 | 1          | 0.1696 | 0 | 0 | 0 | 0.9048 | Ref |



|          |            |            |            |         |                     |              |     |        |            |        |   |   |   |            |
|----------|------------|------------|------------|---------|---------------------|--------------|-----|--------|------------|--------|---|---|---|------------|
| MK962755 | Unassigned | Unassigned | Unassigned | 283_35  | Clustered/Singleton | 1 VC_283_35  | 1   | 0      | 1          | 0      | 0 | 0 | 0 | 1 Ref      |
| MK962756 | Unassigned | Unassigned | Unassigned | 286_1   | Clustered           | 21 VC_286_1  | 21  | 0.1696 | 1          | 0.1696 | 0 | 0 | 0 | 0.9048 Ref |
| MK962757 | Unassigned | Unassigned | Unassigned | 286_1   | Clustered           | 21 VC_286_1  | 21  | 0.1696 | 1          | 0.1696 | 0 | 0 | 0 | 0.9048 Ref |
| MK962758 | Unassigned | Unassigned | Unassigned | 329_3   | Clustered           | 24 VC_329_3  | 24  | 0.1206 | 1          | 0.1206 | 0 | 0 | 0 | 0.7283 Ref |
| MK965969 | Unassigned | Unassigned | Unassigned | 329_1   | Clustered           | 17 VC_329_1  | 17  | 0.0867 | 1          | 0.0867 | 0 | 0 | 0 | 0.8235 Ref |
| MK965970 | Unassigned | Unassigned | Unassigned | 329_1   | Clustered           | 17 VC_329_1  | 17  | 0.0867 | 1          | 0.0867 | 0 | 0 | 0 | 0.8235 Ref |
| MK967377 | Unassigned | Unassigned | Unassigned | 1177_0  | Clustered           | 14 VC_1177_0 | 14  | 0.7847 | 1          | 0.7847 | 0 | 0 | 0 | 0.989 Ref  |
| MK967378 | Unassigned | Unassigned | Unassigned | 890_0   | Clustered           | 3 VC_890_0   | 3   | 0.3565 | 0.99830951 | 0.3559 | 0 | 0 | 0 | 1 Ref      |
| MK967379 | Unassigned | Unassigned | Unassigned | 546_4   | Clustered           | 16 VC_546_4  | 16  | 0.2517 | 0.9999998  | 0.2517 | 0 | 0 | 0 | 0.9417 Ref |
| MK967381 | Unassigned | Unassigned | Unassigned | 1178_0  | Clustered           | 24 VC_1178_0 | 24  | 0.9524 | 1          | 0.9524 | 0 | 0 | 0 | 1 Ref      |
| MK967382 | Unassigned | Unassigned | Unassigned | 224_0   | Clustered           | 19 VC_224_0  | 19  | 0.9416 | 1          | 0.9416 | 0 | 0 | 0 | 1 Ref      |
| MK967383 | Unassigned | Unassigned | Unassigned | 919_0   | Clustered           | 39 VC_919_0  | 39  | 0.9069 | 1          | 0.9069 | 0 | 0 | 0 | 1 Ref      |
| MK967384 | Unassigned | Unassigned | Unassigned | 525_1   | Clustered           | 5 VC_525_1   | 5   | 0.0485 | 0.99999947 | 0.0485 | 0 | 0 | 0 | 0.9 Ref    |
| MK967385 | Unassigned | Unassigned | Unassigned | 919_0   | Clustered           | 39 VC_919_0  | 39  | 0.9069 | 1          | 0.9069 | 0 | 0 | 0 | 1 Ref      |
| MK967386 | Unassigned | Unassigned | Unassigned | 872_0   | Clustered           | 31 VC_872_0  | 31  | 0.8151 | 1          | 0.8151 | 0 | 0 | 0 | 0.8194 Ref |
| MK967387 | Unassigned | Unassigned | Unassigned | 325_19  | Clustered           | 3 VC_325_19  | 3   | 0.0108 | 0.99859221 | 0.0107 | 0 | 0 | 0 | 1 Ref      |
| MK967388 | Unassigned | Unassigned | Unassigned | 1240_0  | Clustered           | 82 VC_1240_0 | 82  | 0.7945 | 1          | 0.7945 | 0 | 0 | 0 | 1 Ref      |
| MK967389 | Unassigned | Unassigned | Unassigned | 1176_0  | Clustered           | 41 VC_1176_0 | 41  | 0.9558 | 1          | 0.9558 | 0 | 0 | 0 | 0.9976 Ref |
| MK967390 | Unassigned | Unassigned | Unassigned | 868_0   | Clustered           | 25 VC_868_0  | 25  | 0.5791 | 1          | 0.5791 | 0 | 0 | 0 | 1 Ref      |
| MK967391 | Unassigned | Unassigned | Unassigned | 1240_0  | Clustered           | 82 VC_1240_0 | 82  | 0.7945 | 1          | 0.7945 | 0 | 0 | 0 | 1 Ref      |
| MK967392 | Unassigned | Unassigned | Unassigned | 954_0   | Clustered           | 13 VC_954_0  | 13  | 0.863  | 1          | 0.863  | 0 | 0 | 0 | 1 Ref      |
| MK967393 | Unassigned | Unassigned | Unassigned | 953_0   | Clustered           | 2 VC_953_0   | 2   | 0.2116 | 0.94820857 | 0.2007 | 0 | 0 | 0 | 1 Ref      |
| MK967394 | Unassigned | Unassigned | Unassigned | 1240_0  | Clustered           | 82 VC_1240_0 | 82  | 0.7945 | 1          | 0.7945 | 0 | 0 | 0 | 1 Ref      |
| MK967395 | Unassigned | Unassigned | Unassigned | 216_4   | Clustered           | 13 VC_216_4  | 13  | 0.1657 | 1          | 0.1657 | 0 | 0 | 0 | 1 Ref      |
| MK967396 | Unassigned | Unassigned | Unassigned | 1093_0  | Clustered           | 40 VC_1093_0 | 40  | 0.8754 | 1          | 0.8754 | 0 | 0 | 0 | 1 Ref      |
| MK967397 | Unassigned | Unassigned | Unassigned | 520_94  | Clustered/Singleton | 1 VC_520_94  | 1   | 0      | 1          | 0      | 0 | 0 | 0 | 1 Ref      |
| MK967398 | Unassigned | Unassigned | Unassigned | 802_0   | Clustered           | 17 VC_802_0  | 17  | 0.8025 | 1          | 0.8025 | 0 | 0 | 0 | 1 Ref      |
| MK967399 | Unassigned | Unassigned | Unassigned | 514_0   | Clustered           | 75 VC_514_0  | 75  | 0.9402 | 1          | 0.9402 | 0 | 0 | 0 | 1 Ref      |
| MK967400 | Unassigned | Unassigned | Unassigned | 1240_0  | Clustered           | 82 VC_1240_0 | 82  | 0.7945 | 1          | 0.7945 | 0 | 0 | 0 | 1 Ref      |
| MK967401 | Unassigned | Unassigned | Unassigned | 325_46  | Clustered           | 2 VC_325_46  | 2   | 0.004  | 0.95751617 | 0.0039 | 0 | 0 | 0 | 1 Ref      |
| MK967402 | Unassigned | Unassigned | Unassigned | 546_4   | Clustered           | 16 VC_546_4  | 16  | 0.2517 | 0.9999998  | 0.2517 | 0 | 0 | 0 | 0.9417 Ref |
| MK972685 | Unassigned | Unassigned | Unassigned | 28_1    | Clustered           | 53 VC_28_1   | 53  | 0.7164 | 1          | 0.7164 | 0 | 0 | 0 | 0.9325 Ref |
| MK972686 | Unassigned | Unassigned | Unassigned | 28_1    | Clustered           | 53 VC_28_1   | 53  | 0.7164 | 1          | 0.7164 | 0 | 0 | 0 | 0.9325 Ref |
| MK972687 | Unassigned | Unassigned | Unassigned | 28_1    | Clustered           | 53 VC_28_1   | 53  | 0.7164 | 1          | 0.7164 | 0 | 0 | 0 | 0.9325 Ref |
| MK972690 | Unassigned | Unassigned | Unassigned | 133_21  | Clustered/Singleton | 1 VC_133_21  | 1   | 0      | 1          | 0      | 0 | 0 | 0 | 1 Ref      |
| MK972691 | Unassigned | Unassigned | Unassigned | 637_0   | Clustered           | 115 VC_637_0 | 115 | 0.731  | 1          | 0.731  | 0 | 0 | 0 | 0.8764 Ref |
| MK972692 | Unassigned | Unassigned | Unassigned | 28_1    | Clustered           | 53 VC_28_1   | 53  | 0.7164 | 1          | 0.7164 | 0 | 0 | 0 | 0.9325 Ref |
| MK972693 | Unassigned | Unassigned | Unassigned | 28_1    | Clustered           | 53 VC_28_1   | 53  | 0.7164 | 1          | 0.7164 | 0 | 0 | 0 | 0.9325 Ref |
| MK972694 | Unassigned | Unassigned | Unassigned | 28_1    | Clustered           | 53 VC_28_1   | 53  | 0.7164 | 1          | 0.7164 | 0 | 0 | 0 | 0.9325 Ref |
| MK972698 | Unassigned | Unassigned | Unassigned | 133_48  | Clustered           | 2 VC_133_48  | 2   | 0.0052 | 0.93639952 | 0.0048 | 0 | 0 | 0 | 1 Ref      |
| MK972699 | Unassigned | Unassigned | Unassigned | 133_48  | Clustered           | 2 VC_133_48  | 2   | 0.0052 | 0.93639952 | 0.0048 | 0 | 0 | 0 | 1 Ref      |
| MK972700 | Unassigned | Unassigned | Unassigned | 637_0   | Clustered           | 115 VC_637_0 | 115 | 0.731  | 1          | 0.731  | 0 | 0 | 0 | 0.8764 Ref |
| MK972701 | Unassigned | Unassigned | Unassigned | 637_0   | Clustered           | 115 VC_637_0 | 115 | 0.731  | 1          | 0.731  | 0 | 0 | 0 | 0.8764 Ref |
| MK972702 | Unassigned | Unassigned | Unassigned | 637_0   | Clustered           | 115 VC_637_0 | 115 | 0.731  | 1          | 0.731  | 0 | 0 | 0 | 0.8764 Ref |
| MK972703 | Unassigned | Unassigned | Unassigned | 637_0   | Clustered           | 115 VC_637_0 | 115 | 0.731  | 1          | 0.731  | 0 | 0 | 0 | 0.8764 Ref |
| MK972704 | Unassigned | Unassigned | Unassigned | 191_3   | Clustered           | 5 VC_191_3   | 5   | 0.0231 | 0.99999849 | 0.0231 | 0 | 0 | 0 | 0.8 Ref    |
| MK972705 | Unassigned | Unassigned | Unassigned | 637_0   | Clustered           | 115 VC_637_0 | 115 | 0.731  | 1          | 0.731  | 0 | 0 | 0 | 0.8764 Ref |
| MK972706 | Unassigned | Unassigned | Unassigned | 637_0   | Clustered           | 115 VC_637_0 | 115 | 0.731  | 1          | 0.731  | 0 | 0 | 0 | 0.8764 Ref |
| MK972707 | Unassigned | Unassigned | Unassigned | 191_3   | Clustered           | 5 VC_191_3   | 5   | 0.0231 | 0.99999849 | 0.0231 | 0 | 0 | 0 | 0.8 Ref    |
| MK972708 | Unassigned | Unassigned | Unassigned | 191_31  | Clustered           | 2 VC_191_31  | 2   | 0.0057 | 0.92424379 | 0.0052 | 0 | 0 | 0 | 1 Ref      |
| MK972709 | Unassigned | Unassigned | Unassigned | 191_3   | Clustered           | 5 VC_191_3   | 5   | 0.0231 | 0.99999849 | 0.0231 | 0 | 0 | 0 | 0.8 Ref    |
| MK972710 | Unassigned | Unassigned | Unassigned | 228_0   | Clustered           | 60 VC_228_0  | 60  | 0.942  | 1          | 0.942  | 0 | 0 | 0 | 1 Ref      |
| MK972711 | Unassigned | Unassigned | Unassigned | 228_0   | Clustered           | 60 VC_228_0  | 60  | 0.942  | 1          | 0.942  | 0 | 0 | 0 | 1 Ref      |
| MK972712 | Unassigned | Unassigned | Unassigned | 5_0     | Clustered           | 30 VC_5_0    | 30  | 0.9647 | 1          | 0.9647 | 0 | 0 | 0 | 1 Ref      |
| MK972713 | Unassigned | Unassigned | Unassigned | 5_0     | Clustered           | 30 VC_5_0    | 30  | 0.9647 | 1          | 0.9647 | 0 | 0 | 0 | 1 Ref      |
| MK972714 | Unassigned | Unassigned | Unassigned | 5_0     | Clustered           | 30 VC_5_0    | 30  | 0.9647 | 1          | 0.9647 | 0 | 0 | 0 | 1 Ref      |
| MK972715 | Unassigned | Unassigned | Unassigned | 190_20  | Clustered           | 4 VC_190_20  | 4   | 0.0229 | 0.99997885 | 0.0229 | 0 | 0 | 0 | 1 Ref      |
| MK972716 | Unassigned | Unassigned | Unassigned | 190_20  | Clustered           | 4 VC_190_20  | 4   | 0.0229 | 0.99997885 | 0.0229 | 0 | 0 | 0 | 1 Ref      |
| MK972717 | Unassigned | Unassigned | Unassigned | 191_16  | Clustered           | 12 VC_191_16 | 12  | 0.0643 | 1          | 0.0643 | 0 | 0 | 0 | 0.9394 Ref |
| MK972831 | Unassigned | Unassigned | Unassigned | 575_0   | Clustered           | 35 VC_575_0  | 35  | 0.8815 | 1          | 0.8815 | 0 | 0 | 0 | 1 Ref      |
| MK976036 | Unassigned | Unassigned | Unassigned | 22_0    | Clustered           | 11 VC_22_0   | 11  | 0.5163 | 1          | 0.5163 | 0 | 0 | 0 | 1 Ref      |
| MK977694 | Unassigned | Unassigned | Unassigned | 283_190 | Clustered/Singleton | 1 VC_283_190 | 1   | 0      | 1          | 0      | 0 | 0 | 0 | 1 Ref      |
| MK977697 | Unassigned | Unassigned | Unassigned | 1240_0  | Clustered           | 82 VC_1240_0 | 82  | 0.7945 | 1          | 0.7945 | 0 | 0 | 0 | 1 Ref      |
| MK977698 | Unassigned | Unassigned | Unassigned | 1352_0  | Clustered           | 31 VC_1352_0 | 31  | 0.849  | 1          | 0.849  | 0 | 0 | 0 | 1 Ref      |
| MK977699 | Unassigned | Unassigned | Unassigned | 767_0   | Clustered           | 34 VC_767_0  | 34  | 0.9173 | 1          | 0.9173 | 0 | 0 | 0 | 1 Ref      |
| MK977700 | Unassigned | Unassigned | Unassigned | 768_0   | Clustered           | 8 VC_768_0   | 8   | 0.7012 | 1          | 0.7012 | 0 | 0 | 0 | 1 Ref      |
| MK977701 | Unassigned | Unassigned | Unassigned | 686_1   | Clustered           | 2 VC_686_1   | 2   | 0.2204 | 0.91327915 | 0.2013 | 0 | 0 | 0 | 1 Ref      |
| MK977702 | Unassigned | Unassigned | Unassigned | 1093_0  | Clustered           | 40 VC_1093_0 | 40  | 0.8754 | 1          | 0.8754 | 0 | 0 | 0 | 1 Ref      |
| MK977705 | Unassigned | Unassigned | Unassigned | 1182_0  | Clustered           | 4 VC_1182_0  | 4   | 0.2845 | 0.99997676 | 0.2845 | 0 | 0 | 0 | 1 Ref      |
| MK977706 | Unassigned | Unassigned | Unassigned | 1199_0  | Clustered           | 8 VC_1199_0  | 8   | 0.7928 | 1          | 0.7928 | 0 | 0 | 0 | 1 Ref      |
| MK977708 | Unassigned | Unassigned | Unassigned | 521_0   | Clustered           | 37 VC_521_0  | 37  | 0.912  | 1          | 0.912  | 0 | 0 | 0 | 1 Ref      |
| MK977709 | Unassigned | Unassigned | Unassigned | 523_0   | Clustered/Singleton | 1 VC_523_0   | 1   | 0      | 1          | 0      | 0 | 0 | 0 | 1 Ref      |
| MK977710 | Unassigned | Unassigned | Unassigned | 1199_0  | Clustered           | 8 VC_1199_0  | 8   | 0.7928 | 1          | 0.7928 | 0 | 0 | 0 | 1 Ref      |
| MK977711 | Unassigned | Unassigned | Unassigned | 1071_3  | Clustered           | 16 VC_1071_3 | 16  | 0.2354 | 1          | 0.2354 | 0 | 0 | 0 | 0.9667 Ref |
| MK977712 | Unassigned | Unassigned | Unassigned | 1199_0  | Clustered           | 8 VC_1199_0  | 8   | 0.7928 | 1          | 0.7928 | 0 | 0 | 0 | 1 Ref      |
| MK977713 | Unassigned | Unassigned | Unassigned | 225_0   | Clustered           | 32 VC_225_0  | 32  | 0.848  | 1          | 0.848  | 0 | 0 | 0 | 0.996 Ref  |
| MK977714 | Unassigned | Unassigned | Unassigned | 1199_0  | Clustered           | 8 VC_1199_0  | 8   | 0.7928 | 1          | 0.7928 | 0 | 0 | 0 | 1 Ref      |
| MK977715 | Unassigned | Unassigned | Unassigned | 1199_0  | Clustered           | 8 VC_1199_0  | 8   | 0.7928 | 1          | 0.7928 | 0 | 0 | 0 | 1 Ref      |
| MK982307 | Unassigned | Unassigned | Unassigned | 695_0   | Clustered           | 48 VC_695_0  | 48  | 0.8162 | 1          | 0.8162 | 0 | 0 | 0 | 1 Ref      |
| MK994515 | Unassigned | Unassigned | Unassigned | 488_1   | Clustered           | 8 VC_488_1   | 8   | 0.2927 | 1          | 0.2927 | 0 | 0 | 0 | 1 Ref      |
| MN010755 | Unassigned | Unassigned | Unassigned | 1344_0  | Clustered           | 78 VC_1344_0 | 78  | 0.9732 | 1          | 0.9732 | 0 | 0 | 0 | 1 Ref      |



|          |            |            |            |         |                     |              |     |        |            |        |   |   |   |            |
|----------|------------|------------|------------|---------|---------------------|--------------|-----|--------|------------|--------|---|---|---|------------|
| MN010756 | Unassigned | Unassigned | Unassigned | 567_0   | Clustered           | 8 VC_567_0   | 8   | 0.4935 | 1          | 0.4935 | 0 | 0 | 0 | 1 Ref      |
| MN010757 | Unassigned | Unassigned | Unassigned | 519_0   | Clustered           | 39 VC_519_0  | 39  | 0.8156 | 1          | 0.8156 | 0 | 0 | 0 | 1 Ref      |
| MN010758 | Unassigned | Unassigned | Unassigned | 406_0   | Clustered           | 11 VC_406_0  | 11  | 0.9449 | 1          | 0.9449 | 0 | 0 | 0 | 1 Ref      |
| MN010759 | Unassigned | Unassigned | Unassigned | 1344_0  | Clustered           | 78 VC_1344_0 | 78  | 0.9732 | 1          | 0.9732 | 0 | 0 | 0 | 1 Ref      |
| MN010760 | Unassigned | Unassigned | Unassigned | 1178_0  | Clustered           | 24 VC_1178_0 | 24  | 0.9524 | 1          | 0.9524 | 0 | 0 | 0 | 1 Ref      |
| MN010761 | Unassigned | Unassigned | Unassigned | 799_1   | Clustered           | 27 VC_799_1  | 27  | 0.8611 | 1          | 0.8611 | 0 | 0 | 0 | 1 Ref      |
| MN010762 | Unassigned | Unassigned | Unassigned | 1176_0  | Clustered           | 41 VC_1176_0 | 41  | 0.9558 | 1          | 0.9558 | 0 | 0 | 0 | 0.9976 Ref |
| MN013074 | Unassigned | Unassigned | Unassigned | 385_0   | Clustered           | 51 VC_385_0  | 51  | 0.8754 | 1          | 0.8754 | 0 | 0 | 0 | 1 Ref      |
| MN013075 | Unassigned | Unassigned | Unassigned | 937_0   | Clustered           | 40 VC_937_0  | 40  | 0.6809 | 1          | 0.6809 | 0 | 0 | 0 | 0.9359 Ref |
| MN013076 | Unassigned | Unassigned | Unassigned | 937_0   | Clustered           | 40 VC_937_0  | 40  | 0.6809 | 1          | 0.6809 | 0 | 0 | 0 | 0.9359 Ref |
| MN013077 | Unassigned | Unassigned | Unassigned | 849_6   | Clustered           | 7 VC_849_6   | 7   | 0.164  | 0.99999999 | 0.164  | 0 | 0 | 0 | 0.9524 Ref |
| MN013078 | Unassigned | Unassigned | Unassigned | 937_0   | Clustered           | 40 VC_937_0  | 40  | 0.6809 | 1          | 0.6809 | 0 | 0 | 0 | 0.9359 Ref |
| MN013079 | Unassigned | Unassigned | Unassigned | 937_0   | Clustered           | 40 VC_937_0  | 40  | 0.6809 | 1          | 0.6809 | 0 | 0 | 0 | 0.9359 Ref |
| MN013080 | Unassigned | Unassigned | Unassigned | 937_0   | Clustered           | 40 VC_937_0  | 40  | 0.6809 | 1          | 0.6809 | 0 | 0 | 0 | 0.9359 Ref |
| MN013082 | Unassigned | Unassigned | Unassigned | 393_0   | Clustered           | 7 VC_393_0   | 7   | 0.1775 | 1          | 0.1775 | 0 | 0 | 0 | 1 Ref      |
| MN013083 | Unassigned | Unassigned | Unassigned | 937_0   | Clustered           | 40 VC_937_0  | 40  | 0.6809 | 1          | 0.6809 | 0 | 0 | 0 | 0.9359 Ref |
| MN013085 | Unassigned | Unassigned | Unassigned | 393_0   | Clustered           | 7 VC_393_0   | 7   | 0.1775 | 1          | 0.1775 | 0 | 0 | 0 | 1 Ref      |
| MN013086 | Unassigned | Unassigned | Unassigned | 37_1    | Clustered           | 3 VC_37_1    | 3   | 0.0833 | 0.9484635  | 0.079  | 0 | 0 | 0 | 1 Ref      |
| MN013087 | Unassigned | Unassigned | Unassigned | 937_0   | Clustered           | 40 VC_937_0  | 40  | 0.6809 | 1          | 0.6809 | 0 | 0 | 0 | 0.9359 Ref |
| MN013088 | Unassigned | Unassigned | Unassigned | 104_0   | Clustered           | 6 VC_104_0   | 6   | 0.8291 | 1          | 0.8291 | 0 | 0 | 0 | 1 Ref      |
| MN013089 | Unassigned | Unassigned | Unassigned | 187_1   | Clustered           | 7 VC_187_1   | 7   | 0.1423 | 1          | 0.1423 | 0 | 0 | 0 | 1 Ref      |
| MN013356 | Unassigned | Unassigned | Unassigned | 76_0    | Clustered           | 37 VC_76_0   | 37  | 0.9403 | 1          | 0.9403 | 0 | 0 | 0 | 1 Ref      |
| MN016939 | Unassigned | Unassigned | Unassigned | 228_0   | Clustered           | 60 VC_228_0  | 60  | 0.942  | 1          | 0.942  | 0 | 0 | 0 | 1 Ref      |
| MN018232 | Unassigned | Unassigned | Unassigned | 432_14  | Clustered/Singleton | 1 VC_432_14  | 1   | 0      | 1          | 0      | 0 | 0 | 0 | 1 Ref      |
| MN019128 | Unassigned | Unassigned | Unassigned | 585_0   | Clustered           | 4 VC_585_0   | 4   | 0.0533 | 0.99998755 | 0.0533 | 0 | 0 | 0 | 1 Ref      |
| MN022785 | Unassigned | Unassigned | Unassigned | 283_130 | Clustered/Singleton | 1 VC_283_130 | 1   | 0      | 1          | 0      | 0 | 0 | 0 | 1 Ref      |
| MN022787 | Unassigned | Unassigned | Unassigned | 190_14  | Clustered           | 3 VC_190_14  | 3   | 0.0144 | 0.99696852 | 0.0143 | 0 | 0 | 0 | 0.6667 Ref |
| MN023176 | Unassigned | Unassigned | Unassigned | 860_0   | Clustered           | 16 VC_860_0  | 16  | 0.9964 | 1          | 0.9964 | 0 | 0 | 0 | 1 Ref      |
| MN023177 | Unassigned | Unassigned | Unassigned | 860_0   | Clustered           | 16 VC_860_0  | 16  | 0.9964 | 1          | 0.9964 | 0 | 0 | 0 | 1 Ref      |
| MN023178 | Unassigned | Unassigned | Unassigned | 860_0   | Clustered           | 16 VC_860_0  | 16  | 0.9964 | 1          | 0.9964 | 0 | 0 | 0 | 1 Ref      |
| MN023179 | Unassigned | Unassigned | Unassigned | 860_0   | Clustered           | 16 VC_860_0  | 16  | 0.9964 | 1          | 0.9964 | 0 | 0 | 0 | 1 Ref      |
| MN023180 | Unassigned | Unassigned | Unassigned | 860_0   | Clustered           | 16 VC_860_0  | 16  | 0.9964 | 1          | 0.9964 | 0 | 0 | 0 | 1 Ref      |
| MN023181 | Unassigned | Unassigned | Unassigned | 860_0   | Clustered           | 16 VC_860_0  | 16  | 0.9964 | 1          | 0.9964 | 0 | 0 | 0 | 1 Ref      |
| MN023182 | Unassigned | Unassigned | Unassigned | 860_0   | Clustered           | 16 VC_860_0  | 16  | 0.9964 | 1          | 0.9964 | 0 | 0 | 0 | 1 Ref      |
| MN023183 | Unassigned | Unassigned | Unassigned | 860_0   | Clustered           | 16 VC_860_0  | 16  | 0.9964 | 1          | 0.9964 | 0 | 0 | 0 | 1 Ref      |
| MN023184 | Unassigned | Unassigned | Unassigned | 860_0   | Clustered           | 16 VC_860_0  | 16  | 0.9964 | 1          | 0.9964 | 0 | 0 | 0 | 1 Ref      |
| MN023185 | Unassigned | Unassigned | Unassigned | 860_0   | Clustered           | 16 VC_860_0  | 16  | 0.9964 | 1          | 0.9964 | 0 | 0 | 0 | 1 Ref      |
| MN023186 | Unassigned | Unassigned | Unassigned | 860_0   | Clustered           | 16 VC_860_0  | 16  | 0.9964 | 1          | 0.9964 | 0 | 0 | 0 | 1 Ref      |
| MN023187 | Unassigned | Unassigned | Unassigned | 860_0   | Clustered           | 16 VC_860_0  | 16  | 0.9964 | 1          | 0.9964 | 0 | 0 | 0 | 1 Ref      |
| MN023188 | Unassigned | Unassigned | Unassigned | 860_0   | Clustered           | 16 VC_860_0  | 16  | 0.9964 | 1          | 0.9964 | 0 | 0 | 0 | 1 Ref      |
| MN023189 | Unassigned | Unassigned | Unassigned | 860_0   | Clustered           | 16 VC_860_0  | 16  | 0.9964 | 1          | 0.9964 | 0 | 0 | 0 | 1 Ref      |
| MN023190 | Unassigned | Unassigned | Unassigned | 860_0   | Clustered           | 16 VC_860_0  | 16  | 0.9964 | 1          | 0.9964 | 0 | 0 | 0 | 1 Ref      |
| MN023191 | Unassigned | Unassigned | Unassigned | 860_0   | Clustered           | 16 VC_860_0  | 16  | 0.9964 | 1          | 0.9964 | 0 | 0 | 0 | 1 Ref      |
| MN026740 | Unassigned | Unassigned | Unassigned | 392_0   | Clustered           | 126 VC_392_0 | 126 | 0.9621 | 1          | 0.9621 | 0 | 0 | 0 | 1 Ref      |
| MN026741 | Unassigned | Unassigned | Unassigned | 190_23  | Clustered           | 10 VC_190_23 | 10  | 0.0704 | 1          | 0.0704 | 0 | 0 | 0 | 0.8444 Ref |
| MN027503 | Unassigned | Unassigned | Unassigned | 92_0    | Clustered           | 22 VC_92_0   | 22  | 0.5639 | 1          | 0.5639 | 0 | 0 | 0 | 1 Ref      |
| MN028536 | Unassigned | Unassigned | Unassigned | 11_0    | Clustered           | 19 VC_11_0   | 19  | 0.7562 | 1          | 0.7562 | 0 | 0 | 0 | 1 Ref      |
| MN029011 | Unassigned | Unassigned | Unassigned | 796_0   | Clustered           | 5 VC_796_0   | 5   | 0.3352 | 0.99999997 | 0.3352 | 0 | 0 | 0 | 1 Ref      |
| MN032614 | Unassigned | Unassigned | Unassigned | 442_3   | Clustered           | 3 VC_442_3   | 3   | 0.0529 | 0.99675181 | 0.0527 | 0 | 0 | 0 | 1 Ref      |
| MN038175 | Unassigned | Unassigned | Unassigned | 669_3   | Clustered/Singleton | 1 VC_669_3   | 1   | 0      | 1          | 0      | 0 | 0 | 0 | 1 Ref      |
| MN038176 | Unassigned | Unassigned | Unassigned | 884_0   | Clustered           | 28 VC_884_0  | 28  | 0.6211 | 1          | 0.6211 | 0 | 0 | 0 | 0.9841 Ref |
| MN038177 | Unassigned | Unassigned | Unassigned | 618_0   | Clustered           | 13 VC_618_0  | 13  | 0.6252 | 1          | 0.6252 | 0 | 0 | 0 | 1 Ref      |
| MN038178 | Unassigned | Unassigned | Unassigned | 883_1   | Clustered           | 12 VC_883_1  | 12  | 0.2441 | 1          | 0.2441 | 0 | 0 | 0 | 1 Ref      |
| MN038179 | Unassigned | Unassigned | Unassigned | 884_0   | Clustered           | 28 VC_884_0  | 28  | 0.6211 | 1          | 0.6211 | 0 | 0 | 0 | 0.9841 Ref |
| MN043729 | Unassigned | Unassigned | Unassigned | 85_10   | Clustered/Singleton | 1 VC_85_10   | 1   | 0      | 1          | 0      | 0 | 0 | 0 | 1 Ref      |
| MN043730 | Unassigned | Unassigned | Unassigned | 85_4    | Clustered           | 3 VC_85_4    | 3   | 0.0294 | 0.98125255 | 0.0288 | 0 | 0 | 0 | 1 Ref      |
| MN045228 | Unassigned | Unassigned | Unassigned | 149_12  | Clustered           | 2 VC_149_12  | 2   | 0.0044 | 0.83156708 | 0.0037 | 0 | 0 | 0 | 1 Ref      |
| MN045229 | Unassigned | Unassigned | Unassigned | 792_0   | Clustered           | 35 VC_792_0  | 35  | 0.9828 | 1          | 0.9828 | 0 | 0 | 0 | 1 Ref      |
| MN045230 | Unassigned | Unassigned | Unassigned | 132_1   | Clustered           | 17 VC_132_1  | 17  | 0.1738 | 1          | 0.1738 | 0 | 0 | 0 | 0.9853 Ref |
| MN045231 | Unassigned | Unassigned | Unassigned | 813_1   | Clustered           | 24 VC_813_1  | 24  | 0.535  | 1          | 0.535  | 0 | 0 | 0 | 1 Ref      |
| MN047438 | Unassigned | Unassigned | Unassigned | 149_8   | Clustered           | 66 VC_149_8  | 66  | 0.4565 | 1          | 0.4565 | 0 | 0 | 0 | 0.8182 Ref |
| MN047793 | Unassigned | Unassigned | Unassigned | 68_1    | Clustered/Singleton | 1 VC_68_1    | 1   | 0      | 1          | 0      | 0 | 0 | 0 | 1 Ref      |
| MN052874 | Unassigned | Unassigned | Unassigned | 823_0   | Clustered           | 124 VC_823_0 | 124 | 0.9492 | 1          | 0.9492 | 0 | 0 | 0 | 1 Ref      |
| MN055691 | Unassigned | Unassigned | Unassigned | 941_0   | Clustered           | 40 VC_941_0  | 40  | 0.6903 | 1          | 0.6903 | 0 | 0 | 0 | 1 Ref      |
| MN061582 | Unassigned | Unassigned | Unassigned | 699_0   | Clustered           | 71 VC_699_0  | 71  | 0.9352 | 1          | 0.9352 | 0 | 0 | 0 | 1 Ref      |
| MN062185 | Unassigned | Unassigned | Unassigned | 530_0   | Clustered           | 9 VC_530_0   | 9   | 0.8027 | 1          | 0.8027 | 0 | 0 | 0 | 1 Ref      |
| MN062186 | Unassigned | Unassigned | Unassigned | 779_3   | Clustered           | 7 VC_779_3   | 7   | 0.0766 | 1          | 0.0766 | 0 | 0 | 0 | 0.7143 Ref |
| MN062187 | Unassigned | Unassigned | Unassigned | 749_0   | Clustered           | 40 VC_749_0  | 40  | 0.7517 | 1          | 0.7517 | 0 | 0 | 0 | 1 Ref      |
| MN062188 | Unassigned | Unassigned | Unassigned | 591_0   | Clustered           | 14 VC_591_0  | 14  | 0.5184 | 1          | 0.5184 | 0 | 0 | 0 | 1 Ref      |
| MN062701 | Unassigned | Unassigned | Unassigned | 546_4   | Clustered           | 16 VC_546_4  | 16  | 0.2517 | 0.9999998  | 0.2517 | 0 | 0 | 0 | 0.9417 Ref |
| MN062702 | Unassigned | Unassigned | Unassigned | 1240_0  | Clustered           | 82 VC_1240_0 | 82  | 0.7945 | 1          | 0.7945 | 0 | 0 | 0 | 1 Ref      |
| MN062704 | Unassigned | Unassigned | Unassigned | 1176_0  | Clustered           | 41 VC_1176_0 | 41  | 0.9558 | 1          | 0.9558 | 0 | 0 | 0 | 0.9976 Ref |
| MN062706 | Unassigned | Unassigned | Unassigned | 513_0   | Clustered           | 32 VC_513_0  | 32  | 0.6881 | 1          | 0.6881 | 0 | 0 | 0 | 1 Ref      |
| MN062707 | Unassigned | Unassigned | Unassigned | 558_77  | Clustered           | 3 VC_558_77  | 3   | 0.0065 | 0.90877939 | 0.0059 | 0 | 0 | 0 | 0.6667 Ref |
| MN062708 | Unassigned | Unassigned | Unassigned | 217_1   | Clustered/Singleton | 1 VC_217_1   | 1   | 0      | 1          | 0      | 0 | 0 | 0 | 1 Ref      |
| MN062709 | Unassigned | Unassigned | Unassigned | 1240_0  | Clustered           | 82 VC_1240_0 | 82  | 0.7945 | 1          | 0.7945 | 0 | 0 | 0 | 1 Ref      |
| MN062710 | Unassigned | Unassigned | Unassigned | 325_52  | Clustered           | 5 VC_325_52  | 5   | 0.0147 | 0.99999073 | 0.0147 | 0 | 0 | 0 | 0.7 Ref    |
| MN062711 | Unassigned | Unassigned | Unassigned | 1361_0  | Clustered           | 6 VC_1361_0  | 6   | 0.2371 | 1          | 0.2371 | 0 | 0 | 0 | 1 Ref      |
| MN062712 | Unassigned | Unassigned | Unassigned | 513_0   | Clustered           | 32 VC_513_0  | 32  | 0.6881 | 1          | 0.6881 | 0 | 0 | 0 | 1 Ref      |
| MN062713 | Unassigned | Unassigned | Unassigned | 1240_0  | Clustered           | 82 VC_1240_0 | 82  | 0.7945 | 1          | 0.7945 | 0 | 0 | 0 | 1 Ref      |
| MN062714 | Unassigned | Unassigned | Unassigned | 1234_0  | Clustered           | 44 VC_1234_0 | 44  | 1      | 1          | 1      | 0 | 0 | 0 | 1 Ref      |



|          |            |            |            |        |                     |              |     |        |            |        |   |   |   |        |     |
|----------|------------|------------|------------|--------|---------------------|--------------|-----|--------|------------|--------|---|---|---|--------|-----|
| MN062715 | Unassigned | Unassigned | Unassigned | 685_0  | Clustered           | 16 VC_685_0  | 16  | 0.2972 | 1          | 0.2972 | 0 | 0 | 0 | 0.9167 | Ref |
| MN062716 | Unassigned | Unassigned | Unassigned | 919_0  | Clustered           | 39 VC_919_0  | 39  | 0.9069 | 1          | 0.9069 | 0 | 0 | 0 | 1      | Ref |
| MN062717 | Unassigned | Unassigned | Unassigned | 1234_0 | Clustered           | 44 VC_1234_0 | 44  | 1      | 1          | 1      | 0 | 0 | 0 | 1      | Ref |
| MN062718 | Unassigned | Unassigned | Unassigned | 514_0  | Clustered           | 75 VC_514_0  | 75  | 0.9402 | 1          | 0.9402 | 0 | 0 | 0 | 1      | Ref |
| MN062719 | Unassigned | Unassigned | Unassigned | 1352_0 | Clustered           | 31 VC_1352_0 | 31  | 0.849  | 1          | 0.849  | 0 | 0 | 0 | 1      | Ref |
| MN065183 | Unassigned | Unassigned | Unassigned | 20_0   | Clustered           | 5 VC_20_0    | 5   | 0.4387 | 0.99999934 | 0.4387 | 0 | 0 | 0 | 1      | Ref |
| MN066127 | Unassigned | Unassigned | Unassigned | 133_22 | Clustered           | 13 VC_133_22 | 13  | 0.0804 | 1          | 0.0804 | 0 | 0 | 0 | 0.8205 | Ref |
| MN067333 | Unassigned | Unassigned | Unassigned | 42_0   | Clustered           | 49 VC_42_0   | 49  | 0.4517 | 1          | 0.4517 | 0 | 0 | 0 | 0.8597 | Ref |
| MN067430 | Unassigned | Unassigned | Unassigned | 451_0  | Clustered           | 80 VC_451_0  | 80  | 0.9991 | 1          | 0.9991 | 0 | 0 | 0 | 1      | Ref |
| MN070121 | Unassigned | Unassigned | Unassigned | 540_0  | Clustered           | 15 VC_540_0  | 15  | 0.2866 | 1          | 0.2866 | 0 | 0 | 0 | 1      | Ref |
| MN078104 | Unassigned | Unassigned | Unassigned | 830_0  | Clustered           | 6 VC_830_0   | 6   | 0.6536 | 1          | 0.6536 | 0 | 0 | 0 | 1      | Ref |
| MN080711 | Unassigned | Unassigned | Unassigned | 386_0  | Clustered           | 49 VC_386_0  | 49  | 0.7941 | 1          | 0.7941 | 0 | 0 | 0 | 1      | Ref |
| MN082624 | Unassigned | Unassigned | Unassigned | 818_0  | Clustered           | 20 VC_818_0  | 20  | 0.9601 | 1          | 0.9601 | 0 | 0 | 0 | 1      | Ref |
| MN087708 | Unassigned | Unassigned | Unassigned | 490_1  | Clustered           | 5 VC_490_1   | 5   | 0.0447 | 0.99999996 | 0.0447 | 0 | 0 | 0 | 1      | Ref |
| MN090155 | Unassigned | Unassigned | Unassigned | 585_1  | Clustered           | 3 VC_585_1   | 3   | 0.0313 | 0.99857668 | 0.0312 | 0 | 0 | 0 | 1      | Ref |
| MN091625 | Unassigned | Unassigned | Unassigned | 149_5  | Clustered/Singleton | 1 VC_149_5   | 1   | 0      | 1          | 0      | 0 | 0 | 0 | 1      | Ref |
| MN091626 | Unassigned | Unassigned | Unassigned | 449_0  | Clustered           | 7 VC_449_0   | 7   | 0.6015 | 1          | 0.6015 | 0 | 0 | 0 | 1      | Ref |
| MN094788 | Unassigned | Unassigned | Unassigned | 66_1   | Clustered/Singleton | 1 VC_66_1    | 1   | 0      | 1          | 0      | 0 | 0 | 0 | 1      | Ref |
| MN095770 | Unassigned | Unassigned | Unassigned | 196_0  | Clustered           | 2 VC_196_0   | 2   | 0.0218 | 0.95762696 | 0.0209 | 0 | 0 | 0 | 1      | Ref |
| MN095771 | Unassigned | Unassigned | Unassigned | 284_0  | Clustered           | 3 VC_284_0   | 3   | 0.0495 | 0.99860966 | 0.0494 | 0 | 0 | 0 | 1      | Ref |
| MN095772 | Unassigned | Unassigned | Unassigned | 506_0  | Clustered           | 8 VC_506_0   | 8   | 0.7376 | 1          | 0.7376 | 0 | 0 | 0 | 1      | Ref |
| MN096356 | Unassigned | Unassigned | Unassigned | 519_0  | Clustered           | 39 VC_519_0  | 39  | 0.8156 | 1          | 0.8156 | 0 | 0 | 0 | 1      | Ref |
| MN096357 | Unassigned | Unassigned | Unassigned | 1031_0 | Clustered           | 4 VC_1031_0  | 4   | 0.7884 | 0.99997621 | 0.7884 | 0 | 0 | 0 | 1      | Ref |
| MN096358 | Unassigned | Unassigned | Unassigned | 1031_0 | Clustered           | 4 VC_1031_0  | 4   | 0.7884 | 0.99997621 | 0.7884 | 0 | 0 | 0 | 1      | Ref |
| MN096359 | Unassigned | Unassigned | Unassigned | 509_0  | Clustered           | 37 VC_509_0  | 37  | 0.9689 | 1          | 0.9689 | 0 | 0 | 0 | 1      | Ref |
| MN096360 | Unassigned | Unassigned | Unassigned | 509_0  | Clustered           | 37 VC_509_0  | 37  | 0.9689 | 1          | 0.9689 | 0 | 0 | 0 | 1      | Ref |
| MN096361 | Unassigned | Unassigned | Unassigned | 551_0  | Clustered           | 16 VC_551_0  | 16  | 0.0915 | 1          | 0.0915 | 0 | 0 | 0 | 0.6667 | Ref |
| MN096363 | Unassigned | Unassigned | Unassigned | 870_0  | Clustered           | 5 VC_870_0   | 5   | 0.424  | 0.99999997 | 0.424  | 0 | 0 | 0 | 1      | Ref |
| MN096364 | Unassigned | Unassigned | Unassigned | 551_8  | Clustered           | 19 VC_551_8  | 19  | 0.1039 | 1          | 0.1039 | 0 | 0 | 0 | 0.8713 | Ref |
| MN096365 | Unassigned | Unassigned | Unassigned | 1176_0 | Clustered           | 41 VC_1176_0 | 41  | 0.9558 | 1          | 0.9558 | 0 | 0 | 0 | 0.9976 | Ref |
| MN096366 | Unassigned | Unassigned | Unassigned | 371_2  | Clustered           | 8 VC_371_2   | 8   | 0.0232 | 1          | 0.0232 | 0 | 0 | 0 | 0.8571 | Ref |
| MN096367 | Unassigned | Unassigned | Unassigned | 1163_0 | Clustered           | 28 VC_1163_0 | 28  | 0.4923 | 1          | 0.4923 | 0 | 0 | 0 | 1      | Ref |
| MN096368 | Unassigned | Unassigned | Unassigned | 514_0  | Clustered           | 75 VC_514_0  | 75  | 0.9402 | 1          | 0.9402 | 0 | 0 | 0 | 1      | Ref |
| MN096370 | Unassigned | Unassigned | Unassigned | 557_0  | Clustered           | 3 VC_557_0   | 3   | 0.0814 | 0.99853279 | 0.0812 | 0 | 0 | 0 | 0.6667 | Ref |
| MN096371 | Unassigned | Unassigned | Unassigned | 1071_3 | Clustered           | 16 VC_1071_3 | 16  | 0.2354 | 1          | 0.2354 | 0 | 0 | 0 | 0.9667 | Ref |
| MN096372 | Unassigned | Unassigned | Unassigned | 940_0  | Clustered           | 34 VC_940_0  | 34  | 0.7959 | 1          | 0.7959 | 0 | 0 | 0 | 1      | Ref |
| MN096373 | Unassigned | Unassigned | Unassigned | 982_0  | Clustered           | 62 VC_982_0  | 62  | 0.8646 | 1          | 0.8646 | 0 | 0 | 0 | 0.743  | Ref |
| MN096374 | Unassigned | Unassigned | Unassigned | 856_1  | Clustered           | 13 VC_856_1  | 13  | 0.5848 | 1          | 0.5848 | 0 | 0 | 0 | 1      | Ref |
| MN096375 | Unassigned | Unassigned | Unassigned | 982_0  | Clustered           | 62 VC_982_0  | 62  | 0.8646 | 1          | 0.8646 | 0 | 0 | 0 | 0.743  | Ref |
| MN096376 | Unassigned | Unassigned | Unassigned | 218_0  | Clustered           | 3 VC_218_0   | 3   | 0.0481 | 0.99860979 | 0.0481 | 0 | 0 | 0 | 1      | Ref |
| MN096377 | Unassigned | Unassigned | Unassigned | 889_0  | Clustered           | 16 VC_889_0  | 16  | 0.2969 | 1          | 0.2969 | 0 | 0 | 0 | 1      | Ref |
| MN096378 | Unassigned | Unassigned | Unassigned | 1163_0 | Clustered           | 28 VC_1163_0 | 28  | 0.4923 | 1          | 0.4923 | 0 | 0 | 0 | 1      | Ref |
| MN096379 | Unassigned | Unassigned | Unassigned | 982_0  | Clustered           | 62 VC_982_0  | 62  | 0.8646 | 1          | 0.8646 | 0 | 0 | 0 | 0.743  | Ref |
| MN096380 | Unassigned | Unassigned | Unassigned | 888_0  | Clustered           | 28 VC_888_0  | 28  | 0.5497 | 1          | 0.5497 | 0 | 0 | 0 | 1      | Ref |
| MN096381 | Unassigned | Unassigned | Unassigned | 982_0  | Clustered           | 62 VC_982_0  | 62  | 0.8646 | 1          | 0.8646 | 0 | 0 | 0 | 0.743  | Ref |
| MN096382 | Unassigned | Unassigned | Unassigned | 887_0  | Clustered           | 18 VC_887_0  | 18  | 0.3663 | 1          | 0.3663 | 0 | 0 | 0 | 1      | Ref |
| MN098325 | Unassigned | Unassigned | Unassigned | 96_0   | Clustered           | 30 VC_96_0   | 30  | 0.718  | 1          | 0.718  | 0 | 0 | 0 | 1      | Ref |
| MN098326 | Unassigned | Unassigned | Unassigned | 792_0  | Clustered           | 35 VC_792_0  | 35  | 0.9828 | 1          | 0.9828 | 0 | 0 | 0 | 1      | Ref |
| MN098327 | Unassigned | Unassigned | Unassigned | 242_1  | Clustered           | 20 VC_242_1  | 20  | 0.684  | 1          | 0.684  | 0 | 0 | 0 | 0.8368 | Ref |
| MN098328 | Unassigned | Unassigned | Unassigned | 506_0  | Clustered           | 8 VC_506_0   | 8   | 0.7376 | 1          | 0.7376 | 0 | 0 | 0 | 1      | Ref |
| MN098329 | Unassigned | Unassigned | Unassigned | 392_0  | Clustered           | 126 VC_392_0 | 126 | 0.9621 | 1          | 0.9621 | 0 | 0 | 0 | 1      | Ref |
| MN101216 | Unassigned | Unassigned | Unassigned | 823_0  | Clustered           | 124 VC_823_0 | 124 | 0.9492 | 1          | 0.9492 | 0 | 0 | 0 | 1      | Ref |
| MN101217 | Unassigned | Unassigned | Unassigned | 111_0  | Clustered           | 91 VC_111_0  | 91  | 0.9587 | 1          | 0.9587 | 0 | 0 | 0 | 1      | Ref |
| MN101218 | Unassigned | Unassigned | Unassigned | 823_0  | Clustered           | 124 VC_823_0 | 124 | 0.9492 | 1          | 0.9492 | 0 | 0 | 0 | 1      | Ref |
| MN101219 | Unassigned | Unassigned | Unassigned | 111_0  | Clustered           | 91 VC_111_0  | 91  | 0.9587 | 1          | 0.9587 | 0 | 0 | 0 | 1      | Ref |
| MN101220 | Unassigned | Unassigned | Unassigned | 111_0  | Clustered           | 91 VC_111_0  | 91  | 0.9587 | 1          | 0.9587 | 0 | 0 | 0 | 1      | Ref |
| MN101221 | Unassigned | Unassigned | Unassigned | 668_2  | Clustered/Singleton | 1 VC_668_2   | 1   | 0      | 1          | 0      | 0 | 0 | 0 | 1      | Ref |
| MN101222 | Unassigned | Unassigned | Unassigned | 586_0  | Clustered           | 3 VC_586_0   | 3   | 0.0495 | 0.99859933 | 0.0495 | 0 | 0 | 0 | 1      | Ref |
| MN101223 | Unassigned | Unassigned | Unassigned | 668_0  | Clustered           | 25 VC_668_0  | 25  | 0.5539 | 1          | 0.5539 | 0 | 0 | 0 | 0.96   | Ref |
| MN101224 | Unassigned | Unassigned | Unassigned | 668_3  | Clustered/Singleton | 1 VC_668_3   | 1   | 0      | 1          | 0      | 0 | 0 | 0 | 1      | Ref |
| MN101225 | Unassigned | Unassigned | Unassigned | 491_1  | Clustered/Singleton | 1 VC_491_1   | 1   | 0      | 1          | 0      | 0 | 0 | 0 | 1      | Ref |
| MN101226 | Unassigned | Unassigned | Unassigned | 491_0  | Clustered           | 36 VC_491_0  | 36  | 0.5336 | 1          | 0.5336 | 0 | 0 | 0 | 0.9714 | Ref |
| MN101227 | Unassigned | Unassigned | Unassigned | 823_0  | Clustered           | 124 VC_823_0 | 124 | 0.9492 | 1          | 0.9492 | 0 | 0 | 0 | 1      | Ref |
| MN101228 | Unassigned | Unassigned | Unassigned | 192_0  | Clustered           | 15 VC_192_0  | 15  | 0.5071 | 1          | 0.5071 | 0 | 0 | 0 | 1      | Ref |
| MN101229 | Unassigned | Unassigned | Unassigned | 491_0  | Clustered           | 36 VC_491_0  | 36  | 0.5336 | 1          | 0.5336 | 0 | 0 | 0 | 0.9714 | Ref |
| MN101230 | Unassigned | Unassigned | Unassigned | 491_0  | Clustered           | 36 VC_491_0  | 36  | 0.5336 | 1          | 0.5336 | 0 | 0 | 0 | 0.9714 | Ref |
| MN102098 | Unassigned | Unassigned | Unassigned | 442_0  | Clustered           | 4 VC_442_0   | 4   | 0.0842 | 0.99996321 | 0.0842 | 0 | 0 | 0 | 1      | Ref |
| MN103542 | Unassigned | Unassigned | Unassigned | 108_0  | Clustered           | 33 VC_108_0  | 33  | 0.949  | 1          | 0.949  | 0 | 0 | 0 | 1      | Ref |
| MN103543 | Unassigned | Unassigned | Unassigned | 344_1  | Clustered           | 3 VC_344_1   | 3   | 0.0359 | 0.93348877 | 0.0335 | 0 | 0 | 0 | 1      | Ref |
| MN114082 | Unassigned | Unassigned | Unassigned | 980_0  | Clustered           | 10 VC_980_0  | 10  | 0.9996 | 1          | 0.9996 | 0 | 0 | 0 | 1      | Ref |
| MN114083 | Unassigned | Unassigned | Unassigned | 980_0  | Clustered           | 10 VC_980_0  | 10  | 0.9996 | 1          | 0.9996 | 0 | 0 | 0 | 1      | Ref |
| MN116494 | Unassigned | Unassigned | Unassigned | 111_0  | Clustered           | 91 VC_111_0  | 91  | 0.9587 | 1          | 0.9587 | 0 | 0 | 0 | 1      | Ref |
| MN117721 | Unassigned | Unassigned | Unassigned | 792_0  | Clustered           | 35 VC_792_0  | 35  | 0.9828 | 1          | 0.9828 | 0 | 0 | 0 | 1      | Ref |
| MN119376 | Unassigned | Unassigned | Unassigned | 1224_0 | Clustered           | 19 VC_1224_0 | 19  | 1      | 1          | 1      | 0 | 0 | 0 | 1      | Ref |
| MN119377 | Unassigned | Unassigned | Unassigned | 325_42 | Clustered           | 4 VC_325_42  | 4   | 0.0112 | 0.99980442 | 0.0112 | 0 | 0 | 0 | 0.6667 | Ref |
| MN119378 | Unassigned | Unassigned | Unassigned | 565_0  | Clustered           | 20 VC_565_0  | 20  | 0.8398 | 1          | 0.8398 | 0 | 0 | 0 | 1      | Ref |
| MN119379 | Unassigned | Unassigned | Unassigned | 325_10 | Clustered           | 3 VC_325_10  | 3   | 0.012  | 0.99859169 | 0.012  | 0 | 0 | 0 | 1      | Ref |
| MN122072 | Unassigned | Unassigned | Unassigned | 792_0  | Clustered           | 35 VC_792_0  | 35  | 0.9828 | 1          | 0.9828 | 0 | 0 | 0 | 1      | Ref |
| MN128593 | Unassigned | Unassigned | Unassigned | 980_0  | Clustered           | 10 VC_980_0  | 10  | 0.9996 | 1          | 0.9996 | 0 | 0 | 0 | 1      | Ref |
| MN128594 | Unassigned | Unassigned | Unassigned | 739_0  | Clustered           | 26 VC_739_0  | 26  | 0.9571 | 1          | 0.9571 | 0 | 0 | 0 | 1      | Ref |
| MN131137 | Unassigned | Unassigned | Unassigned | 442_0  | Clustered           | 4 VC_442_0   | 4   | 0.0842 | 0.99996321 | 0.0842 | 0 | 0 | 0 | 1      | Ref |



|          |            |            |            |        |                     |              |     |        |            |        |   |   |   |        |     |
|----------|------------|------------|------------|--------|---------------------|--------------|-----|--------|------------|--------|---|---|---|--------|-----|
| MN131141 | Unassigned | Unassigned | Unassigned | 79_7   | Clustered           | 33 VC_79_7   | 33  | 0.216  | 1          | 0.216  | 0 | 0 | 0 | 0.8409 | Ref |
| MN131142 | Unassigned | Unassigned | Unassigned | 79_7   | Clustered           | 33 VC_79_7   | 33  | 0.216  | 1          | 0.216  | 0 | 0 | 0 | 0.8409 | Ref |
| MN131143 | Unassigned | Unassigned | Unassigned | 79_7   | Clustered           | 33 VC_79_7   | 33  | 0.216  | 1          | 0.216  | 0 | 0 | 0 | 0.8409 | Ref |
| MN136198 | Unassigned | Unassigned | Unassigned | 792_0  | Clustered           | 35 VC_792_0  | 35  | 0.9828 | 1          | 0.9828 | 0 | 0 | 0 | 1      | Ref |
| MN148435 | Unassigned | Unassigned | Unassigned | 813_1  | Clustered           | 24 VC_813_1  | 24  | 0.535  | 1          | 0.535  | 0 | 0 | 0 | 1      | Ref |
| MN149903 | Unassigned | Unassigned | Unassigned | 823_0  | Clustered           | 124 VC_823_0 | 124 | 0.9492 | 1          | 0.9492 | 0 | 0 | 0 | 1      | Ref |
| MN149904 | Unassigned | Unassigned | Unassigned | 385_0  | Clustered           | 51 VC_385_0  | 51  | 0.8754 | 1          | 0.8754 | 0 | 0 | 0 | 1      | Ref |
| MN150686 | Unassigned | Unassigned | Unassigned | 187_0  | Clustered           | 4 VC_187_0   | 4   | 0.0661 | 0.99994098 | 0.0661 | 0 | 0 | 0 | 1      | Ref |
| MN150710 | Unassigned | Unassigned | Unassigned | 96_0   | Clustered           | 30 VC_96_0   | 30  | 0.718  | 1          | 0.718  | 0 | 0 | 0 | 1      | Ref |
| MN153503 | Unassigned | Unassigned | Unassigned | 883_4  | Clustered/Singleton | 1 VC_883_4   | 1   | 0      | 1          | 0      | 0 | 0 | 0 | 1      | Ref |
| MN153797 | Unassigned | Unassigned | Unassigned | 575_0  | Clustered           | 35 VC_575_0  | 35  | 0.8815 | 1          | 0.8815 | 0 | 0 | 0 | 1      | Ref |
| MN159079 | Unassigned | Unassigned | Unassigned | 442_0  | Clustered           | 4 VC_442_0   | 4   | 0.0842 | 0.99996321 | 0.0842 | 0 | 0 | 0 | 1      | Ref |
| MN161573 | Unassigned | Unassigned | Unassigned | 28_1   | Clustered           | 53 VC_28_1   | 53  | 0.7164 | 1          | 0.7164 | 0 | 0 | 0 | 0.9325 | Ref |
| MN163280 | Unassigned | Unassigned | Unassigned | 192_0  | Clustered           | 15 VC_192_0  | 15  | 0.5071 | 1          | 0.5071 | 0 | 0 | 0 | 1      | Ref |
| MN163281 | Unassigned | Unassigned | Unassigned | 780_0  | Clustered           | 8 VC_780_0   | 8   | 0.5207 | 1          | 0.5207 | 0 | 0 | 0 | 1      | Ref |
| MN164484 | Unassigned | Unassigned | Unassigned | 456_0  | Clustered           | 62 VC_456_0  | 62  | 0.9026 | 1          | 0.9026 | 0 | 0 | 0 | 1      | Ref |
| MN166083 | Unassigned | Unassigned | Unassigned | 698_0  | Clustered           | 26 VC_698_0  | 26  | 0.9366 | 1          | 0.9366 | 0 | 0 | 0 | 1      | Ref |
| MN166823 | Unassigned | Unassigned | Unassigned | 242_1  | Clustered           | 20 VC_242_1  | 20  | 0.684  | 1          | 0.684  | 0 | 0 | 0 | 0.8368 | Ref |
| MN172529 | Unassigned | Unassigned | Unassigned | 739_0  | Clustered           | 26 VC_739_0  | 26  | 0.9571 | 1          | 0.9571 | 0 | 0 | 0 | 1      | Ref |
| MN175603 | Unassigned | Unassigned | Unassigned | 1352_0 | Clustered           | 31 VC_1352_0 | 31  | 0.849  | 1          | 0.849  | 0 | 0 | 0 | 1      | Ref |
| MN175604 | Unassigned | Unassigned | Unassigned | 522_0  | Clustered           | 3 VC_522_0   | 3   | 0.0836 | 0.9985266  | 0.0835 | 0 | 0 | 0 | 1      | Ref |
| MN176217 | Unassigned | Unassigned | Unassigned | 618_0  | Clustered           | 13 VC_618_0  | 13  | 0.6252 | 1          | 0.6252 | 0 | 0 | 0 | 1      | Ref |
| MN176219 | Unassigned | Unassigned | Unassigned | 104_0  | Clustered           | 6 VC_104_0   | 6   | 0.8291 | 1          | 0.8291 | 0 | 0 | 0 | 1      | Ref |
| MN176222 | Unassigned | Unassigned | Unassigned | 103_0  | Clustered           | 6 VC_103_0   | 6   | 0.7337 | 1          | 0.7337 | 0 | 0 | 0 | 1      | Ref |
| MN176223 | Unassigned | Unassigned | Unassigned | 103_0  | Clustered           | 6 VC_103_0   | 6   | 0.7337 | 1          | 0.7337 | 0 | 0 | 0 | 1      | Ref |
| MN176224 | Unassigned | Unassigned | Unassigned | 103_0  | Clustered           | 6 VC_103_0   | 6   | 0.7337 | 1          | 0.7337 | 0 | 0 | 0 | 1      | Ref |
| MN176225 | Unassigned | Unassigned | Unassigned | 103_0  | Clustered           | 6 VC_103_0   | 6   | 0.7337 | 1          | 0.7337 | 0 | 0 | 0 | 1      | Ref |
| MN176226 | Unassigned | Unassigned | Unassigned | 103_0  | Clustered           | 6 VC_103_0   | 6   | 0.7337 | 1          | 0.7337 | 0 | 0 | 0 | 1      | Ref |
| MN176227 | Unassigned | Unassigned | Unassigned | 104_0  | Clustered           | 6 VC_104_0   | 6   | 0.8291 | 1          | 0.8291 | 0 | 0 | 0 | 1      | Ref |
| MN176228 | Unassigned | Unassigned | Unassigned | 104_0  | Clustered           | 6 VC_104_0   | 6   | 0.8291 | 1          | 0.8291 | 0 | 0 | 0 | 1      | Ref |
| MN176229 | Unassigned | Unassigned | Unassigned | 103_0  | Clustered           | 6 VC_103_0   | 6   | 0.7337 | 1          | 0.7337 | 0 | 0 | 0 | 1      | Ref |
| MN176572 | Unassigned | Unassigned | Unassigned | 111_0  | Clustered           | 91 VC_111_0  | 91  | 0.9587 | 1          | 0.9587 | 0 | 0 | 0 | 1      | Ref |
| MN176573 | Unassigned | Unassigned | Unassigned | 111_0  | Clustered           | 91 VC_111_0  | 91  | 0.9587 | 1          | 0.9587 | 0 | 0 | 0 | 1      | Ref |
| MN176574 | Unassigned | Unassigned | Unassigned | 823_0  | Clustered           | 124 VC_823_0 | 124 | 0.9492 | 1          | 0.9492 | 0 | 0 | 0 | 1      | Ref |
| MN180248 | Unassigned | Unassigned | Unassigned | 22_0   | Clustered           | 11 VC_22_0   | 11  | 0.5163 | 1          | 0.5163 | 0 | 0 | 0 | 1      | Ref |
| MN180249 | Unassigned | Unassigned | Unassigned | 22_0   | Clustered           | 11 VC_22_0   | 11  | 0.5163 | 1          | 0.5163 | 0 | 0 | 0 | 1      | Ref |
| MN180250 | Unassigned | Unassigned | Unassigned | 22_0   | Clustered           | 11 VC_22_0   | 11  | 0.5163 | 1          | 0.5163 | 0 | 0 | 0 | 1      | Ref |
| MN180251 | Unassigned | Unassigned | Unassigned | 22_0   | Clustered           | 11 VC_22_0   | 11  | 0.5163 | 1          | 0.5163 | 0 | 0 | 0 | 1      | Ref |
| MN180252 | Unassigned | Unassigned | Unassigned | 22_0   | Clustered           | 11 VC_22_0   | 11  | 0.5163 | 1          | 0.5163 | 0 | 0 | 0 | 1      | Ref |
| MN183279 | Unassigned | Unassigned | Unassigned | 1073_0 | Clustered           | 24 VC_1073_0 | 24  | 0.8388 | 1          | 0.8388 | 0 | 0 | 0 | 1      | Ref |
| MN183280 | Unassigned | Unassigned | Unassigned | 558_60 | Clustered/Singleton | 1 VC_558_60  | 1   | 0      | 1          | 0      | 0 | 0 | 0 | 1      | Ref |
| MN183281 | Unassigned | Unassigned | Unassigned | 1234_0 | Clustered           | 44 VC_1234_0 | 44  | 1      | 1          | 1      | 0 | 0 | 0 | 1      | Ref |
| MN183282 | Unassigned | Unassigned | Unassigned | 1043_0 | Clustered           | 2 VC_1043_0  | 2   | 0.0576 | 0.95654247 | 0.0551 | 0 | 0 | 0 | 1      | Ref |
| MN183283 | Unassigned | Unassigned | Unassigned | 1073_0 | Clustered           | 24 VC_1073_0 | 24  | 0.8388 | 1          | 0.8388 | 0 | 0 | 0 | 1      | Ref |
| MN183284 | Unassigned | Unassigned | Unassigned | 1171_0 | Clustered           | 21 VC_1171_0 | 21  | 0.7125 | 1          | 0.7125 | 0 | 0 | 0 | 1      | Ref |
| MN183285 | Unassigned | Unassigned | Unassigned | 558_18 | Clustered/Singleton | 1 VC_558_18  | 1   | 0      | 1          | 0      | 0 | 0 | 0 | 1      | Ref |
| MN183286 | Unassigned | Unassigned | Unassigned | 546_4  | Clustered           | 16 VC_546_4  | 16  | 0.2517 | 0.9999998  | 0.2517 | 0 | 0 | 0 | 0.9417 | Ref |
| MN184885 | Unassigned | Unassigned | Unassigned | 395_0  | Clustered           | 5 VC_395_0   | 5   | 0.1021 | 0.99999998 | 0.1021 | 0 | 0 | 0 | 1      | Ref |
| MN184887 | Unassigned | Unassigned | Unassigned | 582_0  | Clustered           | 4 VC_582_0   | 4   | 0.0589 | 0.99996986 | 0.0589 | 0 | 0 | 0 | 1      | Ref |
| MN187550 | Unassigned | Unassigned | Unassigned | 476_0  | Clustered           | 19 VC_476_0  | 19  | 0.7814 | 1          | 0.7814 | 0 | 0 | 0 | 1      | Ref |
| MN187969 | Unassigned | Unassigned | Unassigned | 191_19 | Clustered           | 12 VC_191_19 | 12  | 0.0655 | 1          | 0.0655 | 0 | 0 | 0 | 0.8636 | Ref |
| MN191861 | Unassigned | Unassigned | Unassigned | 70_0   | Clustered           | 27 VC_70_0   | 27  | 0.5981 | 1          | 0.5981 | 0 | 0 | 0 | 0.9886 | Ref |
| MN197465 | Unassigned | Unassigned | Unassigned | 191_10 | Clustered/Singleton | 1 VC_191_10  | 1   | 0      | 1          | 0      | 0 | 0 | 0 | 1      | Ref |
| MN200777 | Unassigned | Unassigned | Unassigned | 26_0   | Clustered           | 4 VC_26_0    | 4   | 0.7433 | 0.99936153 | 0.7428 | 0 | 0 | 0 | 1      | Ref |
| MN200778 | Unassigned | Unassigned | Unassigned | 26_0   | Clustered           | 4 VC_26_0    | 4   | 0.7433 | 0.99936153 | 0.7428 | 0 | 0 | 0 | 1      | Ref |
| MN204492 | Unassigned | Unassigned | Unassigned | 872_0  | Clustered           | 31 VC_872_0  | 31  | 0.8151 | 1          | 0.8151 | 0 | 0 | 0 | 0.8194 | Ref |
| MN204493 | Unassigned | Unassigned | Unassigned | 920_0  | Clustered           | 2 VC_920_0   | 2   | 0.1671 | 0.95556296 | 0.1597 | 0 | 0 | 0 | 1      | Ref |
| MN204494 | Unassigned | Unassigned | Unassigned | 872_0  | Clustered           | 31 VC_872_0  | 31  | 0.8151 | 1          | 0.8151 | 0 | 0 | 0 | 0.8194 | Ref |
| MN204495 | Unassigned | Unassigned | Unassigned | 872_0  | Clustered           | 31 VC_872_0  | 31  | 0.8151 | 1          | 0.8151 | 0 | 0 | 0 | 0.8194 | Ref |
| MN204496 | Unassigned | Unassigned | Unassigned | 872_0  | Clustered           | 31 VC_872_0  | 31  | 0.8151 | 1          | 0.8151 | 0 | 0 | 0 | 0.8194 | Ref |
| MN204497 | Unassigned | Unassigned | Unassigned | 872_0  | Clustered           | 31 VC_872_0  | 31  | 0.8151 | 1          | 0.8151 | 0 | 0 | 0 | 0.8194 | Ref |
| MN204498 | Unassigned | Unassigned | Unassigned | 982_0  | Clustered           | 62 VC_982_0  | 62  | 0.8646 | 1          | 0.8646 | 0 | 0 | 0 | 0.743  | Ref |
| MN204499 | Unassigned | Unassigned | Unassigned | 1074_0 | Clustered           | 19 VC_1074_0 | 19  | 0.9198 | 1          | 0.9198 | 0 | 0 | 0 | 1      | Ref |
| MN204500 | Unassigned | Unassigned | Unassigned | 872_0  | Clustered           | 31 VC_872_0  | 31  | 0.8151 | 1          | 0.8151 | 0 | 0 | 0 | 0.8194 | Ref |
| MN204501 | Unassigned | Unassigned | Unassigned | 799_1  | Clustered           | 27 VC_799_1  | 27  | 0.8611 | 1          | 0.8611 | 0 | 0 | 0 | 1      | Ref |
| MN204503 | Unassigned | Unassigned | Unassigned | 1074_0 | Clustered           | 19 VC_1074_0 | 19  | 0.9198 | 1          | 0.9198 | 0 | 0 | 0 | 1      | Ref |
| MN204504 | Unassigned | Unassigned | Unassigned | 872_0  | Clustered           | 31 VC_872_0  | 31  | 0.8151 | 1          | 0.8151 | 0 | 0 | 0 | 0.8194 | Ref |
| MN212906 | Unassigned | Unassigned | Unassigned | 699_0  | Clustered           | 71 VC_699_0  | 71  | 0.9352 | 1          | 0.9352 | 0 | 0 | 0 | 1      | Ref |
| MN215888 | Unassigned | Unassigned | Unassigned | 882_0  | Clustered           | 20 VC_882_0  | 20  | 0.9917 | 1          | 0.9917 | 0 | 0 | 0 | 1      | Ref |
| MN218190 | Unassigned | Unassigned | Unassigned | 191_16 | Clustered           | 12 VC_191_16 | 12  | 0.0643 | 1          | 0.0643 | 0 | 0 | 0 | 0.9394 | Ref |
| MN218191 | Unassigned | Unassigned | Unassigned | 191_16 | Clustered           | 12 VC_191_16 | 12  | 0.0643 | 1          | 0.0643 | 0 | 0 | 0 | 0.9394 | Ref |
| MN218775 | Unassigned | Unassigned | Unassigned | 451_0  | Clustered           | 80 VC_451_0  | 80  | 0.9991 | 1          | 0.9991 | 0 | 0 | 0 | 1      | Ref |
| MN224564 | Unassigned | Unassigned | Unassigned | 1353_0 | Clustered           | 10 VC_1353_0 | 10  | 1      | 1          | 1      | 0 | 0 | 0 | 1      | Ref |
| MN224565 | Unassigned | Unassigned | Unassigned | 1353_0 | Clustered           | 10 VC_1353_0 | 10  | 1      | 1          | 1      | 0 | 0 | 0 | 1      | Ref |
| MN227145 | Unassigned | Unassigned | Unassigned | 329_11 | Clustered           | 15 VC_329_11 | 15  | 0.0791 | 1          | 0.0791 | 0 | 0 | 0 | 0.9333 | Ref |
| MN228696 | Unassigned | Unassigned | Unassigned | 783_0  | Clustered           | 3 VC_783_0   | 3   | 0.0639 | 0.99854307 | 0.0638 | 0 | 0 | 0 | 1      | Ref |
| MN234161 | Unassigned | Unassigned | Unassigned | 1176_0 | Clustered           | 41 VC_1176_0 | 41  | 0.9558 | 1          | 0.9558 | 0 | 0 | 0 | 0.9976 | Ref |
| MN234162 | Unassigned | Unassigned | Unassigned | 572_0  | Clustered           | 16 VC_572_0  | 16  | 0.7286 | 1          | 0.7286 | 0 | 0 | 0 | 1      | Ref |
| MN234163 | Unassigned | Unassigned | Unassigned | 1240_0 | Clustered           | 82 VC_1240_0 | 82  | 0.7945 | 1          | 0.7945 | 0 | 0 | 0 | 1      | Ref |
| MN234164 | Unassigned | Unassigned | Unassigned | 857_0  | Clustered           | 11 VC_857_0  | 11  | 0.9712 | 1          | 0.9712 | 0 | 0 | 0 | 1      | Ref |
| MN234165 | Unassigned | Unassigned | Unassigned | 236_1  | Clustered           | 5 VC_236_1   | 5   | 0.0358 | 0.99999997 | 0.0358 | 0 | 0 | 0 | 1      | Ref |



|          |            |            |            |        |           |              |    |        |            |        |   |   |   |            |
|----------|------------|------------|------------|--------|-----------|--------------|----|--------|------------|--------|---|---|---|------------|
| MN234166 | Unassigned | Unassigned | Unassigned | 869_0  | Clustered | 9 VC_869_0   | 9  | 0.2624 | 1          | 0.2624 | 0 | 0 | 0 | 1 Ref      |
| MN234167 | Unassigned | Unassigned | Unassigned | 225_0  | Clustered | 32 VC_225_0  | 32 | 0.848  | 1          | 0.848  | 0 | 0 | 0 | 0.996 Ref  |
| MN234168 | Unassigned | Unassigned | Unassigned | 1164_0 | Clustered | 25 VC_1164_0 | 25 | 0.7312 | 1          | 0.7312 | 0 | 0 | 0 | 1 Ref      |
| MN234169 | Unassigned | Unassigned | Unassigned | 215_1  | Clustered | 19 VC_215_1  | 19 | 0.4188 | 1          | 0.4188 | 0 | 0 | 0 | 1 Ref      |
| MN234171 | Unassigned | Unassigned | Unassigned | 372_0  | Clustered | 24 VC_372_0  | 24 | 0.5539 | 1          | 0.5539 | 0 | 0 | 0 | 1 Ref      |
| MN234174 | Unassigned | Unassigned | Unassigned | 236_1  | Clustered | 5 VC_236_1   | 5  | 0.0358 | 0.99999997 | 0.0358 | 0 | 0 | 0 | 1 Ref      |
| MN234176 | Unassigned | Unassigned | Unassigned | 237_2  | Clustered | 11 VC_237_2  | 11 | 0.1409 | 1          | 0.1409 | 0 | 0 | 0 | 0.9818 Ref |
| MN234177 | Unassigned | Unassigned | Unassigned | 1240_0 | Clustered | 82 VC_1240_0 | 82 | 0.7945 | 1          | 0.7945 | 0 | 0 | 0 | 1 Ref      |
| MN234179 | Unassigned | Unassigned | Unassigned | 1176_0 | Clustered | 41 VC_1176_0 | 41 | 0.9558 | 1          | 0.9558 | 0 | 0 | 0 | 0.9976 Ref |
| MN234181 | Unassigned | Unassigned | Unassigned | 1240_0 | Clustered | 82 VC_1240_0 | 82 | 0.7945 | 1          | 0.7945 | 0 | 0 | 0 | 1 Ref      |
| MN234182 | Unassigned | Unassigned | Unassigned | 236_0  | Clustered | 72 VC_236_0  | 72 | 0.8104 | 1          | 0.8104 | 0 | 0 | 0 | 1 Ref      |
| MN234183 | Unassigned | Unassigned | Unassigned | 762_0  | Clustered | 9 VC_762_0   | 9  | 0.0885 | 1          | 0.0885 | 0 | 0 | 0 | 1 Ref      |
| MN234185 | Unassigned | Unassigned | Unassigned | 762_0  | Clustered | 9 VC_762_0   | 9  | 0.0885 | 1          | 0.0885 | 0 | 0 | 0 | 1 Ref      |
| MN234187 | Unassigned | Unassigned | Unassigned | 888_1  | Clustered | 3 VC_888_1   | 3  | 0.0289 | 0.99848448 | 0.0289 | 0 | 0 | 0 | 1 Ref      |
| MN234190 | Unassigned | Unassigned | Unassigned | 572_0  | Clustered | 16 VC_572_0  | 16 | 0.7286 | 1          | 0.7286 | 0 | 0 | 0 | 1 Ref      |
| MN234192 | Unassigned | Unassigned | Unassigned | 981_1  | Clustered | 26 VC_981_1  | 26 | 0.7009 | 1          | 0.7009 | 0 | 0 | 0 | 1 Ref      |
| MN234193 | Unassigned | Unassigned | Unassigned | 558_36 | Clustered | 4 VC_558_36  | 4  | 0.0096 | 0.85913852 | 0.0082 | 0 | 0 | 0 | 1 Ref      |
| MN234194 | Unassigned | Unassigned | Unassigned | 1164_0 | Clustered | 25 VC_1164_0 | 25 | 0.7312 | 1          | 0.7312 | 0 | 0 | 0 | 1 Ref      |
| MN234195 | Unassigned | Unassigned | Unassigned | 518_0  | Clustered | 6 VC_518_0   | 6  | 0.1295 | 1          | 0.1295 | 0 | 0 | 0 | 1 Ref      |
| MN234196 | Unassigned | Unassigned | Unassigned | 510_0  | Clustered | 12 VC_510_0  | 12 | 0.3963 | 1          | 0.3963 | 0 | 0 | 0 | 0.9697 Ref |
| MN234197 | Unassigned | Unassigned | Unassigned | 236_0  | Clustered | 72 VC_236_0  | 72 | 0.8104 | 1          | 0.8104 | 0 | 0 | 0 | 1 Ref      |
| MN234198 | Unassigned | Unassigned | Unassigned | 236_0  | Clustered | 72 VC_236_0  | 72 | 0.8104 | 1          | 0.8104 | 0 | 0 | 0 | 1 Ref      |
| MN234199 | Unassigned | Unassigned | Unassigned | 237_1  | Clustered | 13 VC_237_1  | 13 | 0.1773 | 1          | 0.1773 | 0 | 0 | 0 | 0.7308 Ref |
| MN234200 | Unassigned | Unassigned | Unassigned | 225_0  | Clustered | 32 VC_225_0  | 32 | 0.848  | 1          | 0.848  | 0 | 0 | 0 | 0.996 Ref  |
| MN234201 | Unassigned | Unassigned | Unassigned | 236_1  | Clustered | 5 VC_236_1   | 5  | 0.0358 | 0.99999997 | 0.0358 | 0 | 0 | 0 | 1 Ref      |
| MN234203 | Unassigned | Unassigned | Unassigned | 216_6  | Clustered | 42 VC_216_6  | 42 | 0.473  | 1          | 0.473  | 0 | 0 | 0 | 0.8351 Ref |
| MN234204 | Unassigned | Unassigned | Unassigned | 1240_0 | Clustered | 82 VC_1240_0 | 82 | 0.7945 | 1          | 0.7945 | 0 | 0 | 0 | 1 Ref      |
| MN234205 | Unassigned | Unassigned | Unassigned | 236_0  | Clustered | 72 VC_236_0  | 72 | 0.8104 | 1          | 0.8104 | 0 | 0 | 0 | 1 Ref      |
| MN234206 | Unassigned | Unassigned | Unassigned | 1099_0 | Clustered | 2 VC_1099_0  | 2  | 0.2612 | 0.94673154 | 0.2473 | 0 | 0 | 0 | 1 Ref      |
| MN234207 | Unassigned | Unassigned | Unassigned | 572_0  | Clustered | 16 VC_572_0  | 16 | 0.7286 | 1          | 0.7286 | 0 | 0 | 0 | 1 Ref      |
| MN234208 | Unassigned | Unassigned | Unassigned | 981_1  | Clustered | 26 VC_981_1  | 26 | 0.7009 | 1          | 0.7009 | 0 | 0 | 0 | 1 Ref      |
| MN234209 | Unassigned | Unassigned | Unassigned | 225_0  | Clustered | 32 VC_225_0  | 32 | 0.848  | 1          | 0.848  | 0 | 0 | 0 | 0.996 Ref  |
| MN234211 | Unassigned | Unassigned | Unassigned | 1099_0 | Clustered | 2 VC_1099_0  | 2  | 0.2612 | 0.94673154 | 0.2473 | 0 | 0 | 0 | 1 Ref      |
| MN234212 | Unassigned | Unassigned | Unassigned | 325_52 | Clustered | 5 VC_325_52  | 5  | 0.0147 | 0.99999073 | 0.0147 | 0 | 0 | 0 | 0.7 Ref    |
| MN234213 | Unassigned | Unassigned | Unassigned | 949_0  | Clustered | 10 VC_949_0  | 10 | 0.5977 | 1          | 0.5977 | 0 | 0 | 0 | 1 Ref      |
| MN234214 | Unassigned | Unassigned | Unassigned | 1166_0 | Clustered | 20 VC_1166_0 | 20 | 0.99   | 1          | 0.99   | 0 | 0 | 0 | 1 Ref      |
| MN234215 | Unassigned | Unassigned | Unassigned | 919_0  | Clustered | 39 VC_919_0  | 39 | 0.9069 | 1          | 0.9069 | 0 | 0 | 0 | 1 Ref      |
| MN234216 | Unassigned | Unassigned | Unassigned | 864_0  | Clustered | 2 VC_864_0   | 2  | 1      | 1          | 1      | 0 | 0 | 0 | 1 Ref      |
| MN234217 | Unassigned | Unassigned | Unassigned | 857_0  | Clustered | 11 VC_857_0  | 11 | 0.9712 | 1          | 0.9712 | 0 | 0 | 0 | 1 Ref      |
| MN234219 | Unassigned | Unassigned | Unassigned | 857_0  | Clustered | 9 VC_762_0   | 9  | 0.0885 | 1          | 0.0885 | 0 | 0 | 0 | 1 Ref      |
| MN234220 | Unassigned | Unassigned | Unassigned | 572_0  | Clustered | 16 VC_572_0  | 16 | 0.7286 | 1          | 0.7286 | 0 | 0 | 0 | 1 Ref      |
| MN234221 | Unassigned | Unassigned | Unassigned | 1164_0 | Clustered | 25 VC_1164_0 | 25 | 0.7312 | 1          | 0.7312 | 0 | 0 | 0 | 1 Ref      |
| MN234222 | Unassigned | Unassigned | Unassigned | 1240_0 | Clustered | 82 VC_1240_0 | 82 | 0.7945 | 1          | 0.7945 | 0 | 0 | 0 | 1 Ref      |
| MN234223 | Unassigned | Unassigned | Unassigned | 509_0  | Clustered | 37 VC_509_0  | 37 | 0.9689 | 1          | 0.9689 | 0 | 0 | 0 | 1 Ref      |
| MN234224 | Unassigned | Unassigned | Unassigned | 857_0  | Clustered | 11 VC_857_0  | 11 | 0.9712 | 1          | 0.9712 | 0 | 0 | 0 | 1 Ref      |
| MN234225 | Unassigned | Unassigned | Unassigned | 508_0  | Clustered | 32 VC_508_0  | 32 | 0.906  | 1          | 0.906  | 0 | 0 | 0 | 1 Ref      |
| MN234226 | Unassigned | Unassigned | Unassigned | 236_1  | Clustered | 5 VC_236_1   | 5  | 0.0358 | 0.99999997 | 0.0358 | 0 | 0 | 0 | 1 Ref      |
| MN234227 | Unassigned | Unassigned | Unassigned | 565_0  | Clustered | 20 VC_565_0  | 20 | 0.8398 | 1          | 0.8398 | 0 | 0 | 0 | 1 Ref      |
| MN234228 | Unassigned | Unassigned | Unassigned | 888_0  | Clustered | 28 VC_888_0  | 28 | 0.5497 | 1          | 0.5497 | 0 | 0 | 0 | 1 Ref      |
| MN234230 | Unassigned | Unassigned | Unassigned | 236_0  | Clustered | 72 VC_236_0  | 72 | 0.8104 | 1          | 0.8104 | 0 | 0 | 0 | 1 Ref      |
| MN234231 | Unassigned | Unassigned | Unassigned | 236_0  | Clustered | 72 VC_236_0  | 72 | 0.8104 | 1          | 0.8104 | 0 | 0 | 0 | 1 Ref      |
| MN234232 | Unassigned | Unassigned | Unassigned | 572_0  | Clustered | 16 VC_572_0  | 16 | 0.7286 | 1          | 0.7286 | 0 | 0 | 0 | 1 Ref      |
| MN234233 | Unassigned | Unassigned | Unassigned | 1200_0 | Clustered | 4 VC_1200_0  | 4  | 0.8691 | 0.9999992  | 0.8691 | 0 | 0 | 0 | 1 Ref      |
| MN234234 | Unassigned | Unassigned | Unassigned | 1074_0 | Clustered | 19 VC_1074_0 | 19 | 0.9198 | 1          | 0.9198 | 0 | 0 | 0 | 1 Ref      |
| MN234235 | Unassigned | Unassigned | Unassigned | 225_0  | Clustered | 32 VC_225_0  | 32 | 0.848  | 1          | 0.848  | 0 | 0 | 0 | 0.996 Ref  |
| MN234236 | Unassigned | Unassigned | Unassigned | 518_0  | Clustered | 6 VC_518_0   | 6  | 0.1295 | 1          | 0.1295 | 0 | 0 | 0 | 1 Ref      |
| MN241318 | Unassigned | Unassigned | Unassigned | 92_0   | Clustered | 22 VC_92_0   | 22 | 0.5639 | 1          | 0.5639 | 0 | 0 | 0 | 1 Ref      |
| MN252582 | Unassigned | Unassigned | Unassigned | 386_0  | Clustered | 49 VC_386_0  | 49 | 0.7941 | 1          | 0.7941 | 0 | 0 | 0 | 1 Ref      |
| MN263053 | Unassigned | Unassigned | Unassigned | 178_0  | Clustered | 5 VC_178_0   | 5  | 0.7741 | 0.99998991 | 0.7741 | 0 | 0 | 0 | 1 Ref      |
| MN270258 | Unassigned | Unassigned | Unassigned | 632_0  | Clustered | 37 VC_632_0  | 37 | 0.581  | 1          | 0.581  | 0 | 0 | 0 | 0.9234 Ref |
| MN270259 | Unassigned | Unassigned | Unassigned | 632_0  | Clustered | 37 VC_632_0  | 37 | 0.581  | 1          | 0.581  | 0 | 0 | 0 | 0.9234 Ref |
| MN270260 | Unassigned | Unassigned | Unassigned | 632_0  | Clustered | 37 VC_632_0  | 37 | 0.581  | 1          | 0.581  | 0 | 0 | 0 | 0.9234 Ref |
| MN270261 | Unassigned | Unassigned | Unassigned | 632_0  | Clustered | 37 VC_632_0  | 37 | 0.581  | 1          | 0.581  | 0 | 0 | 0 | 0.9234 Ref |
| MN270262 | Unassigned | Unassigned | Unassigned | 632_0  | Clustered | 37 VC_632_0  | 37 | 0.581  | 1          | 0.581  | 0 | 0 | 0 | 0.9234 Ref |
| MN270263 | Unassigned | Unassigned | Unassigned | 632_0  | Clustered | 37 VC_632_0  | 37 | 0.581  | 1          | 0.581  | 0 | 0 | 0 | 0.9234 Ref |
| MN270264 | Unassigned | Unassigned | Unassigned | 632_0  | Clustered | 37 VC_632_0  | 37 | 0.581  | 1          | 0.581  | 0 | 0 | 0 | 0.9234 Ref |
| MN270265 | Unassigned | Unassigned | Unassigned | 632_0  | Clustered | 37 VC_632_0  | 37 | 0.581  | 1          | 0.581  | 0 | 0 | 0 | 0.9234 Ref |
| MN270266 | Unassigned | Unassigned | Unassigned | 632_0  | Clustered | 37 VC_632_0  | 37 | 0.581  | 1          | 0.581  | 0 | 0 | 0 | 0.9234 Ref |
| MN270267 | Unassigned | Unassigned | Unassigned | 632_0  | Clustered | 37 VC_632_0  | 37 | 0.581  | 1          | 0.581  | 0 | 0 | 0 | 0.9234 Ref |
| MN270268 | Unassigned | Unassigned | Unassigned | 632_0  | Clustered | 37 VC_632_0  | 37 | 0.581  | 1          | 0.581  | 0 | 0 | 0 | 0.9234 Ref |
| MN270269 | Unassigned | Unassigned | Unassigned | 632_0  | Clustered | 37 VC_632_0  | 37 | 0.581  | 1          | 0.581  | 0 | 0 | 0 | 0.9234 Ref |
| MN270270 | Unassigned | Unassigned | Unassigned | 632_0  | Clustered | 37 VC_632_0  | 37 | 0.581  | 1          | 0.581  | 0 | 0 | 0 | 0.9234 Ref |
| MN270271 | Unassigned | Unassigned | Unassigned | 632_0  | Clustered | 37 VC_632_0  | 37 | 0.581  | 1          | 0.581  | 0 | 0 | 0 | 0.9234 Ref |
| MN270272 | Unassigned | Unassigned | Unassigned | 632_0  | Clustered | 37 VC_632_0  | 37 | 0.581  | 1          | 0.581  | 0 | 0 | 0 | 0.9234 Ref |
| MN270273 | Unassigned | Unassigned | Unassigned | 632_0  | Clustered | 37 VC_632_0  | 37 | 0.581  | 1          | 0.581  | 0 | 0 | 0 | 0.9234 Ref |
| MN270274 | Unassigned | Unassigned | Unassigned | 632_0  | Clustered | 37 VC_632_0  | 37 | 0.581  | 1          | 0.581  | 0 | 0 | 0 | 0.9234 Ref |
| MN270275 | Unassigned | Unassigned | Unassigned | 632_0  | Clustered | 37 VC_632_0  | 37 | 0.581  | 1          | 0.581  | 0 | 0 | 0 | 0.9234 Ref |
| MN270276 | Unassigned | Unassigned | Unassigned | 632_0  | Clustered | 37 VC_632_0  | 37 | 0.581  | 1          | 0.581  | 0 | 0 | 0 | 0.9234 Ref |
| MN270277 | Unassigned | Unassigned | Unassigned | 632_0  | Clustered | 37 VC_632_0  | 37 | 0.581  | 1          | 0.581  | 0 | 0 | 0 | 0.9234 Ref |
| MN270278 | Unassigned | Unassigned | Unassigned | 632_0  | Clustered | 37 VC_632_0  | 37 | 0.581  | 1          | 0.581  | 0 | 0 | 0 | 0.9234 Ref |
| MN270279 | Unassigned | Unassigned | Unassigned | 632_0  | Clustered | 37 VC_632_0  | 37 | 0.581  | 1          | 0.581  | 0 | 0 | 0 | 0.9234 Ref |



|          |            |            |            |        |                     |              |     |        |            |        |   |   |   |            |
|----------|------------|------------|------------|--------|---------------------|--------------|-----|--------|------------|--------|---|---|---|------------|
| MN270887 | Unassigned | Unassigned | Unassigned | 984_0  | Clustered           | 38 VC_984_0  | 38  | 0.9758 | 1          | 0.9758 | 0 | 0 | 0 | 1 Ref      |
| MN270888 | Unassigned | Unassigned | Unassigned | 984_0  | Clustered           | 38 VC_984_0  | 38  | 0.9758 | 1          | 0.9758 | 0 | 0 | 0 | 1 Ref      |
| MN270891 | Unassigned | Unassigned | Unassigned | 331_0  | Clustered           | 4 VC_331_0   | 4   | 0.0884 | 0.99998775 | 0.0884 | 0 | 0 | 0 | 1 Ref      |
| MN270892 | Unassigned | Unassigned | Unassigned | 331_0  | Clustered           | 4 VC_331_0   | 4   | 0.0884 | 0.99998775 | 0.0884 | 0 | 0 | 0 | 1 Ref      |
| MN271656 | Unassigned | Unassigned | Unassigned | 984_0  | Clustered           | 38 VC_984_0  | 38  | 0.9758 | 1          | 0.9758 | 0 | 0 | 0 | 1 Ref      |
| MN276049 | Unassigned | Unassigned | Unassigned | 701_0  | Clustered           | 2 VC_701_0   | 2   | 0.1487 | 0.95249915 | 0.1417 | 0 | 0 | 0 | 1 Ref      |
| MN276192 | Unassigned | Unassigned | Unassigned | 558_40 | Clustered/Singleton | 1 VC_558_40  | 1   | 0      | 1          | 0      | 0 | 0 | 0 | 1 Ref      |
| MN284892 | Unassigned | Unassigned | Unassigned | 1344_0 | Clustered           | 78 VC_1344_0 | 78  | 0.9732 | 1          | 0.9732 | 0 | 0 | 0 | 1 Ref      |
| MN284893 | Unassigned | Unassigned | Unassigned | 372_1  | Clustered           | 9 VC_372_1   | 9   | 0.194  | 1          | 0.194  | 0 | 0 | 0 | 1 Ref      |
| MN284894 | Unassigned | Unassigned | Unassigned | 1224_0 | Clustered           | 19 VC_1224_0 | 19  | 1      | 1          | 1      | 0 | 0 | 0 | 1 Ref      |
| MN284895 | Unassigned | Unassigned | Unassigned | 237_3  | Clustered           | 8 VC_237_3   | 8   | 0.1092 | 1          | 0.1092 | 0 | 0 | 0 | 1 Ref      |
| MN284896 | Unassigned | Unassigned | Unassigned | 799_1  | Clustered           | 27 VC_799_1  | 27  | 0.8611 | 1          | 0.8611 | 0 | 0 | 0 | 1 Ref      |
| MN284897 | Unassigned | Unassigned | Unassigned | 802_0  | Clustered           | 17 VC_802_0  | 17  | 0.8025 | 1          | 0.8025 | 0 | 0 | 0 | 1 Ref      |
| MN284898 | Unassigned | Unassigned | Unassigned | 224_0  | Clustered           | 19 VC_224_0  | 19  | 0.9416 | 1          | 0.9416 | 0 | 0 | 0 | 1 Ref      |
| MN284899 | Unassigned | Unassigned | Unassigned | 982_0  | Clustered           | 62 VC_982_0  | 62  | 0.8646 | 1          | 0.8646 | 0 | 0 | 0 | 0.743 Ref  |
| MN284900 | Unassigned | Unassigned | Unassigned | 514_0  | Clustered           | 75 VC_514_0  | 75  | 0.9402 | 1          | 0.9402 | 0 | 0 | 0 | 1 Ref      |
| MN284901 | Unassigned | Unassigned | Unassigned | 1163_0 | Clustered           | 28 VC_1163_0 | 28  | 0.4923 | 1          | 0.4923 | 0 | 0 | 0 | 1 Ref      |
| MN284902 | Unassigned | Unassigned | Unassigned | 1164_0 | Clustered           | 25 VC_1164_0 | 25  | 0.7312 | 1          | 0.7312 | 0 | 0 | 0 | 1 Ref      |
| MN284904 | Unassigned | Unassigned | Unassigned | 799_1  | Clustered           | 27 VC_799_1  | 27  | 0.8611 | 1          | 0.8611 | 0 | 0 | 0 | 1 Ref      |
| MN284905 | Unassigned | Unassigned | Unassigned | 517_0  | Clustered           | 18 VC_517_0  | 18  | 0.1599 | 1          | 0.1599 | 0 | 0 | 0 | 1 Ref      |
| MN284906 | Unassigned | Unassigned | Unassigned | 919_0  | Clustered           | 39 VC_919_0  | 39  | 0.9069 | 1          | 0.9069 | 0 | 0 | 0 | 1 Ref      |
| MN284907 | Unassigned | Unassigned | Unassigned | 1178_0 | Clustered           | 24 VC_1178_0 | 24  | 0.9524 | 1          | 0.9524 | 0 | 0 | 0 | 1 Ref      |
| MN284908 | Unassigned | Unassigned | Unassigned | 565_0  | Clustered           | 20 VC_565_0  | 20  | 0.8398 | 1          | 0.8398 | 0 | 0 | 0 | 1 Ref      |
| MN294712 | Unassigned | Unassigned | Unassigned | 699_0  | Clustered           | 71 VC_699_0  | 71  | 0.9352 | 1          | 0.9352 | 0 | 0 | 0 | 1 Ref      |
| MN296515 | Unassigned | Unassigned | Unassigned | 575_0  | Clustered           | 35 VC_575_0  | 35  | 0.8815 | 1          | 0.8815 | 0 | 0 | 0 | 1 Ref      |
| MN304941 | Unassigned | Unassigned | Unassigned | 149_15 | Clustered           | 16 VC_149_15 | 16  | 0.0788 | 1          | 0.0788 | 0 | 0 | 0 | 0.8083 Ref |
| MN310541 | Unassigned | Unassigned | Unassigned | 220_0  | Clustered           | 4 VC_220_0   | 4   | 0.0615 | 0.99998802 | 0.0615 | 0 | 0 | 0 | 1 Ref      |
| MN310542 | Unassigned | Unassigned | Unassigned | 225_0  | Clustered           | 32 VC_225_0  | 32  | 0.848  | 1          | 0.848  | 0 | 0 | 0 | 0.996 Ref  |
| MN310543 | Unassigned | Unassigned | Unassigned | 1163_0 | Clustered           | 28 VC_1163_0 | 28  | 0.4923 | 1          | 0.4923 | 0 | 0 | 0 | 1 Ref      |
| MN310544 | Unassigned | Unassigned | Unassigned | 520_75 | Clustered/Singleton | 1 VC_520_75  | 1   | 0      | 1          | 0      | 0 | 0 | 0 | 1 Ref      |
| MN310545 | Unassigned | Unassigned | Unassigned | 520_82 | Clustered/Singleton | 1 VC_520_82  | 1   | 0      | 1          | 0      | 0 | 0 | 0 | 1 Ref      |
| MN310546 | Unassigned | Unassigned | Unassigned | 1360_0 | Clustered           | 31 VC_1360_0 | 31  | 0.8837 | 1          | 0.8837 | 0 | 0 | 0 | 1 Ref      |
| MN310547 | Unassigned | Unassigned | Unassigned | 221_0  | Clustered           | 22 VC_221_0  | 22  | 0.7447 | 1          | 0.7447 | 0 | 0 | 0 | 1 Ref      |
| MN310548 | Unassigned | Unassigned | Unassigned | 520_7  | Clustered/Singleton | 1 VC_520_7   | 1   | 0      | 1          | 0      | 0 | 0 | 0 | 1 Ref      |
| MN310549 | Unassigned | Unassigned | Unassigned | 919_0  | Clustered           | 39 VC_919_0  | 39  | 0.9069 | 1          | 0.9069 | 0 | 0 | 0 | 1 Ref      |
| MN311487 | Unassigned | Unassigned | Unassigned | 1262_0 | Clustered           | 2 VC_1262_0  | 2   | 0.1193 | 0.95613564 | 0.1141 | 0 | 0 | 0 | 1 Ref      |
| MN311488 | Unassigned | Unassigned | Unassigned | 1062_0 | Clustered           | 45 VC_1062_0 | 45  | 0.9734 | 0.50949847 | 0.4959 | 0 | 0 | 0 | 1 Ref      |
| MN311489 | Unassigned | Unassigned | Unassigned | 1062_0 | Clustered           | 45 VC_1062_0 | 45  | 0.9734 | 0.50949847 | 0.4959 | 0 | 0 | 0 | 1 Ref      |
| MN311490 | Unassigned | Unassigned | Unassigned | 1062_0 | Clustered           | 45 VC_1062_0 | 45  | 0.9734 | 0.50949847 | 0.4959 | 0 | 0 | 0 | 1 Ref      |
| MN311491 | Unassigned | Unassigned | Unassigned | 1062_0 | Clustered           | 45 VC_1062_0 | 45  | 0.9734 | 0.50949847 | 0.4959 | 0 | 0 | 0 | 1 Ref      |
| MN311492 | Unassigned | Unassigned | Unassigned | 1262_0 | Clustered           | 2 VC_1262_0  | 2   | 0.1193 | 0.95613564 | 0.1141 | 0 | 0 | 0 | 1 Ref      |
| MN311493 | Unassigned | Unassigned | Unassigned | 1243_0 | Clustered           | 52 VC_1243_0 | 52  | 0.9126 | 0.92708311 | 0.8461 | 0 | 0 | 0 | 1 Ref      |
| MN313256 | Unassigned | Unassigned | Unassigned | 644_0  | Clustered           | 5 VC_644_0   | 5   | 0.6649 | 0.99999975 | 0.6649 | 0 | 0 | 0 | 1 Ref      |
| MN316588 | Unassigned | Unassigned | Unassigned | 190_14 | Clustered           | 3 VC_190_14  | 3   | 0.0144 | 0.99696852 | 0.0143 | 0 | 0 | 0 | 0.6667 Ref |
| MN317029 | Unassigned | Unassigned | Unassigned | 597_0  | Clustered           | 6 VC_597_0   | 6   | 0.1801 | 1          | 0.1801 | 0 | 0 | 0 | 1 Ref      |
| MN329673 | Unassigned | Unassigned | Unassigned | 1093_0 | Clustered           | 40 VC_1093_0 | 40  | 0.8754 | 1          | 0.8754 | 0 | 0 | 0 | 1 Ref      |
| MN329674 | Unassigned | Unassigned | Unassigned | 939_0  | Clustered           | 15 VC_939_0  | 15  | 1      | 0          | 0      | 0 | 0 | 0 | 1 Ref      |
| MN329675 | Unassigned | Unassigned | Unassigned | 1234_0 | Clustered           | 44 VC_1234_0 | 44  | 1      | 1          | 1      | 0 | 0 | 0 | 1 Ref      |
| MN329676 | Unassigned | Unassigned | Unassigned | 939_0  | Clustered           | 15 VC_939_0  | 15  | 1      | 0          | 0      | 0 | 0 | 0 | 1 Ref      |
| MN329677 | Unassigned | Unassigned | Unassigned | 1093_0 | Clustered           | 40 VC_1093_0 | 40  | 0.8754 | 1          | 0.8754 | 0 | 0 | 0 | 1 Ref      |
| MN329678 | Unassigned | Unassigned | Unassigned | 765_0  | Clustered           | 132 VC_765_0 | 132 | 1      | 1          | 1      | 0 | 0 | 0 | 1 Ref      |
| MN329679 | Unassigned | Unassigned | Unassigned | 1344_0 | Clustered           | 78 VC_1344_0 | 78  | 0.9732 | 1          | 0.9732 | 0 | 0 | 0 | 1 Ref      |
| MN334766 | Unassigned | Unassigned | Unassigned | 488_2  | Clustered           | 2 VC_488_2   | 2   | 0.0325 | 0.95511029 | 0.0311 | 0 | 0 | 0 | 1 Ref      |
| MN335248 | Unassigned | Unassigned | Unassigned | 177_0  | Clustered           | 5 VC_177_0   | 5   | 0.7468 | 0.99885646 | 0.746  | 0 | 0 | 0 | 1 Ref      |
| MN336261 | Unassigned | Unassigned | Unassigned | 149_8  | Clustered           | 66 VC_149_8  | 66  | 0.4565 | 1          | 0.4565 | 0 | 0 | 0 | 0.8182 Ref |
| MN336262 | Unassigned | Unassigned | Unassigned | 149_8  | Clustered           | 66 VC_149_8  | 66  | 0.4565 | 1          | 0.4565 | 0 | 0 | 0 | 0.8182 Ref |
| MN336263 | Unassigned | Unassigned | Unassigned | 149_8  | Clustered           | 66 VC_149_8  | 66  | 0.4565 | 1          | 0.4565 | 0 | 0 | 0 | 0.8182 Ref |
| MN336264 | Unassigned | Unassigned | Unassigned | 637_0  | Clustered           | 115 VC_637_0 | 115 | 0.731  | 1          | 0.731  | 0 | 0 | 0 | 0.8764 Ref |
| MN336265 | Unassigned | Unassigned | Unassigned | 637_0  | Clustered           | 115 VC_637_0 | 115 | 0.731  | 1          | 0.731  | 0 | 0 | 0 | 0.8764 Ref |
| MN336266 | Unassigned | Unassigned | Unassigned | 637_0  | Clustered           | 115 VC_637_0 | 115 | 0.731  | 1          | 0.731  | 0 | 0 | 0 | 0.8764 Ref |
| MN337573 | Unassigned | Unassigned | Unassigned | 575_0  | Clustered           | 35 VC_575_0  | 35  | 0.8815 | 1          | 0.8815 | 0 | 0 | 0 | 1 Ref      |
| MN337887 | Unassigned | Unassigned | Unassigned | 690_0  | Clustered           | 50 VC_690_0  | 50  | 0.9805 | 1          | 0.9805 | 0 | 0 | 0 | 1 Ref      |
| MN340231 | Unassigned | Unassigned | Unassigned | 30_1   | Clustered           | 16 VC_30_1   | 16  | 0.1973 | 1          | 0.1973 | 0 | 0 | 0 | 0.8333 Ref |
| MN342150 | Unassigned | Unassigned | Unassigned | 133_22 | Clustered           | 13 VC_133_22 | 13  | 0.0804 | 1          | 0.0804 | 0 | 0 | 0 | 0.8205 Ref |
| MN342151 | Unassigned | Unassigned | Unassigned | 330_0  | Clustered           | 27 VC_330_0  | 27  | 0.5088 | 1          | 0.5088 | 0 | 0 | 0 | 0.8661 Ref |
| MN342247 | Unassigned | Unassigned | Unassigned | 575_0  | Clustered           | 35 VC_575_0  | 35  | 0.8815 | 1          | 0.8815 | 0 | 0 | 0 | 1 Ref      |
| MN346464 | Unassigned | Unassigned | Unassigned | 187_4  | Clustered/Singleton | 1 VC_187_4   | 1   | 0      | 1          | 0      | 0 | 0 | 0 | 1 Ref      |
| MN369737 | Unassigned | Unassigned | Unassigned | 1240_0 | Clustered           | 82 VC_1240_0 | 82  | 0.7945 | 1          | 0.7945 | 0 | 0 | 0 | 1 Ref      |
| MN369738 | Unassigned | Unassigned | Unassigned | 371_14 | Clustered/Singleton | 1 VC_371_14  | 1   | 0      | 1          | 0      | 0 | 0 | 0 | 1 Ref      |
| MN369739 | Unassigned | Unassigned | Unassigned | 520_17 | Clustered/Singleton | 1 VC_520_17  | 1   | 0      | 1          | 0      | 0 | 0 | 0 | 1 Ref      |
| MN369740 | Unassigned | Unassigned | Unassigned | 1176_0 | Clustered           | 41 VC_1176_0 | 41  | 0.9558 | 1          | 0.9558 | 0 | 0 | 0 | 0.9976 Ref |
| MN369741 | Unassigned | Unassigned | Unassigned | 225_0  | Clustered           | 32 VC_225_0  | 32  | 0.848  | 1          | 0.848  | 0 | 0 | 0 | 0.996 Ref  |
| MN369742 | Unassigned | Unassigned | Unassigned | 236_0  | Clustered           | 72 VC_236_0  | 72  | 0.8104 | 1          | 0.8104 | 0 | 0 | 0 | 1 Ref      |
| MN369743 | Unassigned | Unassigned | Unassigned | 1071_3 | Clustered           | 16 VC_1071_3 | 16  | 0.2354 | 1          | 0.2354 | 0 | 0 | 0 | 0.9667 Ref |
| MN369744 | Unassigned | Unassigned | Unassigned | 371_11 | Clustered           | 31 VC_371_11 | 31  | 0.0927 | 1          | 0.0927 | 0 | 0 | 0 | 0.7011 Ref |
| MN369745 | Unassigned | Unassigned | Unassigned | 1344_0 | Clustered           | 78 VC_1344_0 | 78  | 0.9732 | 1          | 0.9732 | 0 | 0 | 0 | 1 Ref      |
| MN369746 | Unassigned | Unassigned | Unassigned | 236_0  | Clustered           | 72 VC_236_0  | 72  | 0.8104 | 1          | 0.8104 | 0 | 0 | 0 | 1 Ref      |
| MN369747 | Unassigned | Unassigned | Unassigned | 1360_0 | Clustered           | 31 VC_1360_0 | 31  | 0.8837 | 1          | 0.8837 | 0 | 0 | 0 | 1 Ref      |
| MN369748 | Unassigned | Unassigned | Unassigned | 216_0  | Clustered           | 4 VC_216_0   | 4   | 0.048  | 0.9999878  | 0.048  | 0 | 0 | 0 | 1 Ref      |
| MN369749 | Unassigned | Unassigned | Unassigned | 520_19 | Clustered           | 2 VC_520_19  | 2   | 0.0098 | 0.95761552 | 0.0094 | 0 | 0 | 0 | 1 Ref      |
| MN369750 | Unassigned | Unassigned | Unassigned | 1071_0 | Clustered           | 20 VC_1071_0 | 20  | 0.3268 | 1          | 0.3268 | 0 | 0 | 0 | 0.9842 Ref |



|          |            |            |            |        |                     |              |     |        |            |        |   |   |   |            |
|----------|------------|------------|------------|--------|---------------------|--------------|-----|--------|------------|--------|---|---|---|------------|
| MN369751 | Unassigned | Unassigned | Unassigned | 520_85 | Clustered           | 2 VC_520_85  | 2   | 0.0148 | 0.95762405 | 0.0142 | 0 | 0 | 0 | 1 Ref      |
| MN369752 | Unassigned | Unassigned | Unassigned | 520_10 | Clustered/Singleton | 1 VC_520_10  | 1   | 0      | 1          | 0      | 0 | 0 | 0 | 1 Ref      |
| MN369753 | Unassigned | Unassigned | Unassigned | 767_0  | Clustered           | 34 VC_767_0  | 34  | 0.9173 | 1          | 0.9173 | 0 | 0 | 0 | 1 Ref      |
| MN369754 | Unassigned | Unassigned | Unassigned | 1072_4 | Clustered           | 4 VC_1072_4  | 4   | 0.0736 | 0.99956559 | 0.0736 | 0 | 0 | 0 | 1 Ref      |
| MN369755 | Unassigned | Unassigned | Unassigned | 520_33 | Clustered           | 2 VC_520_33  | 2   | 0.0087 | 0.95761571 | 0.0083 | 0 | 0 | 0 | 1 Ref      |
| MN369756 | Unassigned | Unassigned | Unassigned | 224_0  | Clustered           | 19 VC_224_0  | 19  | 0.9416 | 1          | 0.9416 | 0 | 0 | 0 | 1 Ref      |
| MN369757 | Unassigned | Unassigned | Unassigned | 1071_0 | Clustered           | 20 VC_1071_0 | 20  | 0.3268 | 1          | 0.3268 | 0 | 0 | 0 | 0.9842 Ref |
| MN369758 | Unassigned | Unassigned | Unassigned | 510_0  | Clustered           | 12 VC_510_0  | 12  | 0.3963 | 1          | 0.3963 | 0 | 0 | 0 | 0.9697 Ref |
| MN369759 | Unassigned | Unassigned | Unassigned | 372_0  | Clustered           | 24 VC_372_0  | 24  | 0.5539 | 1          | 0.5539 | 0 | 0 | 0 | 1 Ref      |
| MN369760 | Unassigned | Unassigned | Unassigned | 325_36 | Clustered           | 2 VC_325_36  | 2   | 0.0043 | 0.95751115 | 0.0041 | 0 | 0 | 0 | 1 Ref      |
| MN369761 | Unassigned | Unassigned | Unassigned | 234_0  | Clustered           | 21 VC_234_0  | 21  | 0.8355 | 1          | 0.8355 | 0 | 0 | 0 | 1 Ref      |
| MN369762 | Unassigned | Unassigned | Unassigned | 237_2  | Clustered           | 11 VC_237_2  | 11  | 0.1409 | 1          | 0.1409 | 0 | 0 | 0 | 0.9818 Ref |
| MN369763 | Unassigned | Unassigned | Unassigned | 225_0  | Clustered           | 32 VC_225_0  | 32  | 0.848  | 1          | 0.848  | 0 | 0 | 0 | 0.996 Ref  |
| MN369764 | Unassigned | Unassigned | Unassigned | 225_0  | Clustered           | 32 VC_225_0  | 32  | 0.848  | 1          | 0.848  | 0 | 0 | 0 | 0.996 Ref  |
| MN369765 | Unassigned | Unassigned | Unassigned | 1162_0 | Clustered           | 10 VC_1162_0 | 10  | 0.5715 | 1          | 0.5715 | 0 | 0 | 0 | 1 Ref      |
| MN369766 | Unassigned | Unassigned | Unassigned | 767_0  | Clustered           | 34 VC_767_0  | 34  | 0.9173 | 1          | 0.9173 | 0 | 0 | 0 | 1 Ref      |
| MN379460 | Unassigned | Unassigned | Unassigned | 121_0  | Clustered           | 4 VC_121_0   | 4   | 0.1814 | 0.99998531 | 0.1814 | 0 | 0 | 0 | 1 Ref      |
| MN379629 | Unassigned | Unassigned | Unassigned | 1409_0 | Clustered           | 2 VC_1409_0  | 2   | 1      | 1          | 1      | 0 | 0 | 0 | 1 Ref      |
| MN379630 | Unassigned | Unassigned | Unassigned | 1122_0 | Clustered           | 10 VC_1122_0 | 10  | 0.9643 | 0.99999697 | 0.9643 | 0 | 0 | 0 | 1 Ref      |
| MN379632 | Unassigned | Unassigned | Unassigned | 1081_0 | Clustered/Singleton | 1 VC_1081_0  | 1   | 0      | 1          | 0      | 0 | 0 | 0 | 1 Ref      |
| MN379633 | Unassigned | Unassigned | Unassigned | 1054_0 | Clustered           | 12 VC_1054_0 | 12  | 0.2863 | 0.99746644 | 0.2855 | 0 | 0 | 0 | 1 Ref      |
| MN379636 | Unassigned | Unassigned | Unassigned | 1409_0 | Clustered           | 2 VC_1409_0  | 2   | 1      | 1          | 1      | 0 | 0 | 0 | 1 Ref      |
| MN379637 | Unassigned | Unassigned | Unassigned | 1233_0 | Clustered           | 16 VC_1233_0 | 16  | 0.8971 | 1          | 0.8971 | 0 | 0 | 0 | 1 Ref      |
| MN379638 | Unassigned | Unassigned | Unassigned | 1277_0 | Clustered           | 14 VC_1277_0 | 14  | 0.8218 | 1          | 0.8218 | 0 | 0 | 0 | 1 Ref      |
| MN379639 | Unassigned | Unassigned | Unassigned | 1410_0 | Clustered           | 2 VC_1410_0  | 2   | 1      | 1          | 1      | 0 | 0 | 0 | 1 Ref      |
| MN379640 | Unassigned | Unassigned | Unassigned | 1122_0 | Clustered           | 10 VC_1122_0 | 10  | 0.9643 | 0.99999697 | 0.9643 | 0 | 0 | 0 | 1 Ref      |
| MN379641 | Unassigned | Unassigned | Unassigned | 1153_0 | Clustered           | 2 VC_1153_0  | 2   | 0.073  | 0.80562642 | 0.0588 | 0 | 0 | 0 | 1 Ref      |
| MN379643 | Unassigned | Unassigned | Unassigned | 1411_0 | Clustered           | 2 VC_1411_0  | 2   | 1      | 1          | 1      | 0 | 0 | 0 | 1 Ref      |
| MN379645 | Unassigned | Unassigned | Unassigned | 1275_0 | Clustered           | 4 VC_1275_0  | 4   | 1      | 1          | 1      | 0 | 0 | 0 | 1 Ref      |
| MN379646 | Unassigned | Unassigned | Unassigned | 1410_0 | Clustered           | 2 VC_1410_0  | 2   | 1      | 1          | 1      | 0 | 0 | 0 | 1 Ref      |
| MN379647 | Unassigned | Unassigned | Unassigned | 1233_0 | Clustered           | 16 VC_1233_0 | 16  | 0.8971 | 1          | 0.8971 | 0 | 0 | 0 | 1 Ref      |
| MN379648 | Unassigned | Unassigned | Unassigned | 1277_0 | Clustered           | 14 VC_1277_0 | 14  | 0.8218 | 1          | 0.8218 | 0 | 0 | 0 | 1 Ref      |
| MN379650 | Unassigned | Unassigned | Unassigned | 1411_0 | Clustered           | 2 VC_1411_0  | 2   | 1      | 1          | 1      | 0 | 0 | 0 | 1 Ref      |
| MN379651 | Unassigned | Unassigned | Unassigned | 1054_0 | Clustered           | 12 VC_1054_0 | 12  | 0.2863 | 0.99746644 | 0.2855 | 0 | 0 | 0 | 1 Ref      |
| MN379739 | Unassigned | Unassigned | Unassigned | 191_16 | Clustered           | 12 VC_191_16 | 12  | 0.0643 | 1          | 0.0643 | 0 | 0 | 0 | 0.9394 Ref |
| MN379740 | Unassigned | Unassigned | Unassigned | 428_0  | Clustered           | 33 VC_428_0  | 33  | 0.9915 | 1          | 0.9915 | 0 | 0 | 0 | 1 Ref      |
| MN379832 | Unassigned | Unassigned | Unassigned | 938_0  | Clustered           | 99 VC_938_0  | 99  | 0.9119 | 1          | 0.9119 | 0 | 0 | 0 | 0.9928 Ref |
| MN380459 | Unassigned | Unassigned | Unassigned | 111_0  | Clustered           | 91 VC_111_0  | 91  | 0.9587 | 1          | 0.9587 | 0 | 0 | 0 | 1 Ref      |
| MN384978 | Unassigned | Unassigned | Unassigned | 452_0  | Clustered           | 66 VC_452_0  | 66  | 0.9248 | 1          | 0.9248 | 0 | 0 | 0 | 1 Ref      |
| MN384979 | Unassigned | Unassigned | Unassigned | 133_9  | Clustered           | 3 VC_133_9   | 3   | 0.0099 | 0.98457109 | 0.0098 | 0 | 0 | 0 | 1 Ref      |
| MN385565 | Unassigned | Unassigned | Unassigned | 303_0  | Clustered           | 155 VC_303_0 | 155 | 0.9979 | 1          | 0.9979 | 0 | 0 | 0 | 1 Ref      |
| MN393078 | Unassigned | Unassigned | Unassigned | 637_0  | Clustered           | 115 VC_637_0 | 115 | 0.731  | 1          | 0.731  | 0 | 0 | 0 | 0.8764 Ref |
| MN393079 | Unassigned | Unassigned | Unassigned | 540_0  | Clustered           | 15 VC_540_0  | 15  | 0.2866 | 1          | 0.2866 | 0 | 0 | 0 | 1 Ref      |
| MN393473 | Unassigned | Unassigned | Unassigned | 575_0  | Clustered           | 35 VC_575_0  | 35  | 0.8815 | 1          | 0.8815 | 0 | 0 | 0 | 1 Ref      |
| MN395285 | Unassigned | Unassigned | Unassigned | 938_0  | Clustered           | 99 VC_938_0  | 99  | 0.9119 | 1          | 0.9119 | 0 | 0 | 0 | 0.9928 Ref |
| MN395286 | Unassigned | Unassigned | Unassigned | 938_0  | Clustered           | 99 VC_938_0  | 99  | 0.9119 | 1          | 0.9119 | 0 | 0 | 0 | 0.9928 Ref |
| MN395291 | Unassigned | Unassigned | Unassigned | 699_0  | Clustered           | 71 VC_699_0  | 71  | 0.9352 | 1          | 0.9352 | 0 | 0 | 0 | 1 Ref      |
| MN402506 | Unassigned | Unassigned | Unassigned | 495_1  | Clustered           | 41 VC_495_1  | 41  | 0.328  | 1          | 0.328  | 0 | 0 | 0 | 0.911 Ref  |
| MN414250 | Unassigned | Unassigned | Unassigned | 451_0  | Clustered           | 80 VC_451_0  | 80  | 0.9991 | 1          | 0.9991 | 0 | 0 | 0 | 1 Ref      |
| MN417334 | Unassigned | Unassigned | Unassigned | 1022_0 | Clustered           | 4 VC_1022_0  | 4   | 0.8047 | 0.99996089 | 0.8046 | 0 | 0 | 0 | 1 Ref      |
| MN419153 | Unassigned | Unassigned | Unassigned | 495_0  | Clustered           | 39 VC_495_0  | 39  | 0.308  | 1          | 0.308  | 0 | 0 | 0 | 1 Ref      |
| MN428049 | Unassigned | Unassigned | Unassigned | 508_0  | Clustered           | 32 VC_508_0  | 32  | 0.906  | 1          | 0.906  | 0 | 0 | 0 | 1 Ref      |
| MN428050 | Unassigned | Unassigned | Unassigned | 372_0  | Clustered           | 24 VC_372_0  | 24  | 0.5539 | 1          | 0.5539 | 0 | 0 | 0 | 1 Ref      |
| MN428051 | Unassigned | Unassigned | Unassigned | 520_92 | Clustered           | 5 VC_520_92  | 5   | 0.0663 | 0.99999997 | 0.0663 | 0 | 0 | 0 | 1 Ref      |
| MN428052 | Unassigned | Unassigned | Unassigned | 556_0  | Clustered           | 21 VC_556_0  | 21  | 0.9912 | 1          | 0.9912 | 0 | 0 | 0 | 1 Ref      |
| MN428053 | Unassigned | Unassigned | Unassigned | 522_1  | Clustered           | 5 VC_522_1   | 5   | 0.1017 | 0.99999997 | 0.1017 | 0 | 0 | 0 | 0.8 Ref    |
| MN428054 | Unassigned | Unassigned | Unassigned | 325_35 | Clustered           | 17 VC_325_35 | 17  | 0.0732 | 1          | 0.0732 | 0 | 0 | 0 | 0.7721 Ref |
| MN428056 | Unassigned | Unassigned | Unassigned | 939_0  | Clustered           | 15 VC_939_0  | 15  | 1      | 0          | 0      | 0 | 0 | 0 | 1 Ref      |
| MN428058 | Unassigned | Unassigned | Unassigned | 556_0  | Clustered           | 21 VC_556_0  | 21  | 0.9912 | 1          | 0.9912 | 0 | 0 | 0 | 1 Ref      |
| MN428059 | Unassigned | Unassigned | Unassigned | 551_6  | Clustered           | 22 VC_551_6  | 22  | 0.1214 | 1          | 0.1214 | 0 | 0 | 0 | 0.8095 Ref |
| MN428060 | Unassigned | Unassigned | Unassigned | 1071_0 | Clustered           | 20 VC_1071_0 | 20  | 0.3268 | 1          | 0.3268 | 0 | 0 | 0 | 0.9842 Ref |
| MN428061 | Unassigned | Unassigned | Unassigned | 939_0  | Clustered           | 15 VC_939_0  | 15  | 1      | 0          | 0      | 0 | 0 | 0 | 1 Ref      |
| MN428062 | Unassigned | Unassigned | Unassigned | 1344_0 | Clustered           | 78 VC_1344_0 | 78  | 0.9732 | 1          | 0.9732 | 0 | 0 | 0 | 1 Ref      |
| MN428063 | Unassigned | Unassigned | Unassigned | 767_0  | Clustered           | 34 VC_767_0  | 34  | 0.9173 | 1          | 0.9173 | 0 | 0 | 0 | 1 Ref      |
| MN428064 | Unassigned | Unassigned | Unassigned | 1344_0 | Clustered           | 78 VC_1344_0 | 78  | 0.9732 | 1          | 0.9732 | 0 | 0 | 0 | 1 Ref      |
| MN428065 | Unassigned | Unassigned | Unassigned | 558_38 | Clustered           | 2 VC_558_38  | 2   | 0.0032 | 0.64328629 | 0.002  | 0 | 0 | 0 | 1 Ref      |
| MN428066 | Unassigned | Unassigned | Unassigned | 558_20 | Clustered           | 17 VC_558_20 | 17  | 0.054  | 1          | 0.054  | 0 | 0 | 0 | 0.9926 Ref |
| MN432485 | Unassigned | Unassigned | Unassigned | 941_0  | Clustered           | 40 VC_941_0  | 40  | 0.6903 | 1          | 0.6903 | 0 | 0 | 0 | 1 Ref      |
| MN433707 | Unassigned | Unassigned | Unassigned | 699_0  | Clustered           | 71 VC_699_0  | 71  | 0.9352 | 1          | 0.9352 | 0 | 0 | 0 | 1 Ref      |
| MN434093 | Unassigned | Unassigned | Unassigned | 823_0  | Clustered           | 124 VC_823_0 | 124 | 0.9492 | 1          | 0.9492 | 0 | 0 | 0 | 1 Ref      |
| MN434094 | Unassigned | Unassigned | Unassigned | 192_0  | Clustered           | 15 VC_192_0  | 15  | 0.5071 | 1          | 0.5071 | 0 | 0 | 0 | 1 Ref      |
| MN434095 | Unassigned | Unassigned | Unassigned | 491_0  | Clustered           | 36 VC_491_0  | 36  | 0.5336 | 1          | 0.5336 | 0 | 0 | 0 | 0.9714 Ref |
| MN434096 | Unassigned | Unassigned | Unassigned | 192_0  | Clustered           | 15 VC_192_0  | 15  | 0.5071 | 1          | 0.5071 | 0 | 0 | 0 | 1 Ref      |
| MN444868 | Unassigned | Unassigned | Unassigned | 371_3  | Clustered           | 22 VC_371_3  | 22  | 0.0787 | 1          | 0.0787 | 0 | 0 | 0 | 0.9048 Ref |
| MN444869 | Unassigned | Unassigned | Unassigned | 325_6  | Clustered/Singleton | 1 VC_325_6   | 1   | 0      | 1          | 0      | 0 | 0 | 0 | 1 Ref      |
| MN444870 | Unassigned | Unassigned | Unassigned | 890_1  | Clustered           | 4 VC_890_1   | 4   | 0.4613 | 0.99998458 | 0.4613 | 0 | 0 | 0 | 1 Ref      |
| MN444871 | Unassigned | Unassigned | Unassigned | 919_0  | Clustered           | 39 VC_919_0  | 39  | 0.9069 | 1          | 0.9069 | 0 | 0 | 0 | 1 Ref      |
| MN444872 | Unassigned | Unassigned | Unassigned | 509_0  | Clustered           | 37 VC_509_0  | 37  | 0.9689 | 1          | 0.9689 | 0 | 0 | 0 | 1 Ref      |
| MN444873 | Unassigned | Unassigned | Unassigned | 509_0  | Clustered           | 37 VC_509_0  | 37  | 0.9689 | 1          | 0.9689 | 0 | 0 | 0 | 1 Ref      |
| MN444874 | Unassigned | Unassigned | Unassigned | 868_0  | Clustered           | 25 VC_868_0  | 25  | 0.5791 | 1          | 0.5791 | 0 | 0 | 0 | 1 Ref      |
| MN444875 | Unassigned | Unassigned | Unassigned | 761_0  | Clustered           | 67 VC_761_0  | 67  | 0.8947 | 1          | 0.8947 | 0 | 0 | 0 | 1 Ref      |



|          |            |            |            |         |                     |              |     |        |            |        |   |   |   |            |
|----------|------------|------------|------------|---------|---------------------|--------------|-----|--------|------------|--------|---|---|---|------------|
| MN444876 | Unassigned | Unassigned | Unassigned | 1071_4  | Clustered/Singleton | 1 VC_1071_4  | 1   | 0      | 1          | 0      | 0 | 0 | 0 | 1 Ref      |
| MN444877 | Unassigned | Unassigned | Unassigned | 1352_0  | Clustered           | 31 VC_1352_0 | 31  | 0.849  | 1          | 0.849  | 0 | 0 | 0 | 1 Ref      |
| MN444878 | Unassigned | Unassigned | Unassigned | 919_0   | Clustered           | 39 VC_919_0  | 39  | 0.9069 | 1          | 0.9069 | 0 | 0 | 0 | 1 Ref      |
| MN445182 | Unassigned | Unassigned | Unassigned | 190_34  | Clustered/Singleton | 1 VC_190_34  | 1   | 0      | 1          | 0      | 0 | 0 | 0 | 1 Ref      |
| MN445183 | Unassigned | Unassigned | Unassigned | 489_0   | Clustered           | 3 VC_489_0   | 3   | 0.0677 | 0.98259158 | 0.0666 | 0 | 0 | 0 | 1 Ref      |
| MN445184 | Unassigned | Unassigned | Unassigned | 133_42  | Clustered/Singleton | 1 VC_133_42  | 1   | 0      | 1          | 0      | 0 | 0 | 0 | 1 Ref      |
| MN445185 | Unassigned | Unassigned | Unassigned | 959_5   | Clustered           | 19 VC_959_5  | 19  | 0.2626 | 1          | 0.2626 | 0 | 0 | 0 | 1 Ref      |
| MN450150 | Unassigned | Unassigned | Unassigned | 387_0   | Clustered           | 3 VC_387_0   | 3   | 0.0424 | 0.99861589 | 0.0423 | 0 | 0 | 0 | 1 Ref      |
| MN453779 | Unassigned | Unassigned | Unassigned | 442_3   | Clustered           | 3 VC_442_3   | 3   | 0.0529 | 0.99675181 | 0.0527 | 0 | 0 | 0 | 1 Ref      |
| MN461279 | Unassigned | Unassigned | Unassigned | 364_0   | Clustered           | 16 VC_364_0  | 16  | 0.6491 | 1          | 0.6491 | 0 | 0 | 0 | 1 Ref      |
| MN478375 | Unassigned | Unassigned | Unassigned | 74_0    | Clustered           | 15 VC_74_0   | 15  | 0.5204 | 1          | 0.5204 | 0 | 0 | 0 | 1 Ref      |
| MN478377 | Unassigned | Unassigned | Unassigned | 192_2   | Clustered/Singleton | 1 VC_192_2   | 1   | 0      | 1          | 0      | 0 | 0 | 0 | 1 Ref      |
| MN478483 | Unassigned | Unassigned | Unassigned | 132_1   | Clustered           | 17 VC_132_1  | 17  | 0.1738 | 1          | 0.1738 | 0 | 0 | 0 | 0.9853 Ref |
| MN481365 | Unassigned | Unassigned | Unassigned | 392_0   | Clustered           | 126 VC_392_0 | 126 | 0.9621 | 1          | 0.9621 | 0 | 0 | 0 | 1 Ref      |
| MN481366 | Unassigned | Unassigned | Unassigned | 392_0   | Clustered           | 126 VC_392_0 | 126 | 0.9621 | 1          | 0.9621 | 0 | 0 | 0 | 1 Ref      |
| MN481367 | Unassigned | Unassigned | Unassigned | 329_11  | Clustered           | 15 VC_329_11 | 15  | 0.0791 | 1          | 0.0791 | 0 | 0 | 0 | 0.9333 Ref |
| MN484599 | Unassigned | Unassigned | Unassigned | 1071_0  | Clustered           | 20 VC_1071_0 | 20  | 0.3268 | 1          | 0.3268 | 0 | 0 | 0 | 0.9842 Ref |
| MN484600 | Unassigned | Unassigned | Unassigned | 1166_0  | Clustered           | 20 VC_1166_0 | 20  | 0.99   | 1          | 0.99   | 0 | 0 | 0 | 1 Ref      |
| MN484601 | Unassigned | Unassigned | Unassigned | 1098_0  | Clustered           | 4 VC_1098_0  | 4   | 0.5465 | 0.99996462 | 0.5465 | 0 | 0 | 0 | 1 Ref      |
| MN496305 | Unassigned | Unassigned | Unassigned | 599_0   | Clustered           | 50 VC_599_0  | 50  | 0.9989 | 1          | 0.9989 | 0 | 0 | 0 | 1 Ref      |
| MN496306 | Unassigned | Unassigned | Unassigned | 599_0   | Clustered           | 50 VC_599_0  | 50  | 0.9989 | 1          | 0.9989 | 0 | 0 | 0 | 1 Ref      |
| MN496307 | Unassigned | Unassigned | Unassigned | 599_0   | Clustered           | 50 VC_599_0  | 50  | 0.9989 | 1          | 0.9989 | 0 | 0 | 0 | 1 Ref      |
| MN496308 | Unassigned | Unassigned | Unassigned | 599_0   | Clustered           | 50 VC_599_0  | 50  | 0.9989 | 1          | 0.9989 | 0 | 0 | 0 | 1 Ref      |
| MN497953 | Unassigned | Unassigned | Unassigned | 514_0   | Clustered           | 75 VC_514_0  | 75  | 0.9402 | 1          | 0.9402 | 0 | 0 | 0 | 1 Ref      |
| MN497954 | Unassigned | Unassigned | Unassigned | 1343_0  | Clustered           | 21 VC_1343_0 | 21  | 0.9843 | 1          | 0.9843 | 0 | 0 | 0 | 1 Ref      |
| MN504636 | Unassigned | Unassigned | Unassigned | 465_0   | Clustered           | 7 VC_465_0   | 7   | 0.3322 | 1          | 0.3322 | 0 | 0 | 0 | 1 Ref      |
| MN508614 | Unassigned | Unassigned | Unassigned | 283_0   | Clustered           | 2 VC_283_0   | 2   | 0.0025 | 0.94936553 | 0.0024 | 0 | 0 | 0 | 1 Ref      |
| MN508615 | Unassigned | Unassigned | Unassigned | 813_1   | Clustered           | 24 VC_813_1  | 24  | 0.535  | 1          | 0.535  | 0 | 0 | 0 | 1 Ref      |
| MN508616 | Unassigned | Unassigned | Unassigned | 283_110 | Clustered           | 2 VC_283_110 | 2   | 0.0027 | 0.90910416 | 0.0024 | 0 | 0 | 0 | 1 Ref      |
| MN508617 | Unassigned | Unassigned | Unassigned | 283_110 | Clustered           | 2 VC_283_110 | 2   | 0.0027 | 0.90910416 | 0.0024 | 0 | 0 | 0 | 1 Ref      |
| MN508618 | Unassigned | Unassigned | Unassigned | 283_0   | Clustered           | 2 VC_283_0   | 2   | 0.0025 | 0.94936553 | 0.0024 | 0 | 0 | 0 | 1 Ref      |
| MN508619 | Unassigned | Unassigned | Unassigned | 472_0   | Clustered           | 47 VC_472_0  | 47  | 0.9025 | 1          | 0.9025 | 0 | 0 | 0 | 1 Ref      |
| MN508620 | Unassigned | Unassigned | Unassigned | 80_0    | Clustered           | 41 VC_80_0   | 41  | 0.5837 | 1          | 0.5837 | 0 | 0 | 0 | 0.9805 Ref |
| MN508621 | Unassigned | Unassigned | Unassigned | 669_0   | Clustered           | 21 VC_669_0  | 21  | 0.3623 | 1          | 0.3623 | 0 | 0 | 0 | 1 Ref      |
| MN508622 | Unassigned | Unassigned | Unassigned | 669_0   | Clustered           | 21 VC_669_0  | 21  | 0.3623 | 1          | 0.3623 | 0 | 0 | 0 | 1 Ref      |
| MN508623 | Unassigned | Unassigned | Unassigned | 669_0   | Clustered           | 21 VC_669_0  | 21  | 0.3623 | 1          | 0.3623 | 0 | 0 | 0 | 1 Ref      |
| MN508624 | Unassigned | Unassigned | Unassigned | 669_0   | Clustered           | 21 VC_669_0  | 21  | 0.3623 | 1          | 0.3623 | 0 | 0 | 0 | 1 Ref      |
| MN508817 | Unassigned | Unassigned | Unassigned | 669_2   | Clustered/Singleton | 1 VC_669_2   | 1   | 0      | 1          | 0.3623 | 0 | 0 | 0 | 1 Ref      |
| MN509793 | Unassigned | Unassigned | Unassigned | 878_0   | Clustered           | 32 VC_878_0  | 32  | 0.9965 | 1          | 0.9965 | 0 | 0 | 0 | 1 Ref      |
| MN510331 | Unassigned | Unassigned | Unassigned | 451_0   | Clustered           | 80 VC_451_0  | 80  | 0.9991 | 1          | 0.9991 | 0 | 0 | 0 | 1 Ref      |
| MN512538 | Unassigned | Unassigned | Unassigned | 354_0   | Clustered           | 4 VC_354_0   | 4   | 0.1749 | 0.99998684 | 0.1749 | 0 | 0 | 0 | 0.8333 Ref |
| MN516421 | Unassigned | Unassigned | Unassigned | 698_0   | Clustered           | 26 VC_698_0  | 26  | 0.9366 | 1          | 0.9366 | 0 | 0 | 0 | 1 Ref      |
| MN516422 | Unassigned | Unassigned | Unassigned | 698_0   | Clustered           | 26 VC_698_0  | 26  | 0.9366 | 1          | 0.9366 | 0 | 0 | 0 | 1 Ref      |
| MN518893 | Unassigned | Unassigned | Unassigned | 451_0   | Clustered           | 80 VC_451_0  | 80  | 0.9991 | 1          | 0.9991 | 0 | 0 | 0 | 1 Ref      |
| MN518894 | Unassigned | Unassigned | Unassigned | 451_0   | Clustered           | 80 VC_451_0  | 80  | 0.9991 | 1          | 0.9991 | 0 | 0 | 0 | 1 Ref      |
| MN528768 | Unassigned | Unassigned | Unassigned | 534_0   | Clustered           | 9 VC_534_0   | 9   | 0.99   | 1          | 0.99   | 0 | 0 | 0 | 1 Ref      |
| MN534316 | Unassigned | Unassigned | Unassigned | 260_0   | Clustered           | 13 VC_260_0  | 13  | 0.3705 | 1          | 0.3705 | 0 | 0 | 0 | 1 Ref      |
| MN534317 | Unassigned | Unassigned | Unassigned | 260_0   | Clustered           | 13 VC_260_0  | 13  | 0.3705 | 1          | 0.3705 | 0 | 0 | 0 | 1 Ref      |
| MN534320 | Unassigned | Unassigned | Unassigned | 262_0   | Clustered           | 5 VC_262_0   | 5   | 0.0724 | 0.99999989 | 0.0724 | 0 | 0 | 0 | 1 Ref      |
| MN536023 | Unassigned | Unassigned | Unassigned | 16_0    | Clustered           | 12 VC_16_0   | 12  | 0.6615 | 1          | 0.6615 | 0 | 0 | 0 | 1 Ref      |
| MN536027 | Unassigned | Unassigned | Unassigned | 251_0   | Clustered           | 22 VC_251_0  | 22  | 0.6508 | 1          | 0.6508 | 0 | 0 | 0 | 1 Ref      |
| MN539736 | Unassigned | Unassigned | Unassigned | 149_8   | Clustered           | 66 VC_149_8  | 66  | 0.4565 | 1          | 0.4565 | 0 | 0 | 0 | 0.8182 Ref |
| MN539737 | Unassigned | Unassigned | Unassigned | 149_8   | Clustered           | 66 VC_149_8  | 66  | 0.4565 | 1          | 0.4565 | 0 | 0 | 0 | 0.8182 Ref |
| MN539738 | Unassigned | Unassigned | Unassigned | 149_8   | Clustered           | 66 VC_149_8  | 66  | 0.4565 | 1          | 0.4565 | 0 | 0 | 0 | 0.8182 Ref |
| MN549360 | Unassigned | Unassigned | Unassigned | 1052_3  | Clustered           | 5 VC_1052_3  | 5   | 0.185  | 0.98656048 | 0.1825 | 0 | 0 | 0 | 1 Ref      |
| MN549361 | Unassigned | Unassigned | Unassigned | 1052_3  | Clustered           | 5 VC_1052_3  | 5   | 0.185  | 0.98656048 | 0.1825 | 0 | 0 | 0 | 1 Ref      |
| MN552143 | Unassigned | Unassigned | Unassigned | 800_0   | Clustered           | 3 VC_800_0   | 3   | 0.4591 | 0.9984737  | 0.4584 | 0 | 0 | 0 | 1 Ref      |
| MN552144 | Unassigned | Unassigned | Unassigned | 268_0   | Clustered           | 7 VC_268_0   | 7   | 0.3427 | 1          | 0.3427 | 0 | 0 | 0 | 1 Ref      |
| MN552145 | Unassigned | Unassigned | Unassigned | 474_0   | Clustered           | 14 VC_474_0  | 14  | 0.8466 | 1          | 0.8466 | 0 | 0 | 0 | 1 Ref      |
| MN552146 | Unassigned | Unassigned | Unassigned | 861_0   | Clustered           | 9 VC_861_0   | 9   | 0.5869 | 1          | 0.5869 | 0 | 0 | 0 | 1 Ref      |
| MN552147 | Unassigned | Unassigned | Unassigned | 862_0   | Clustered           | 11 VC_862_0  | 11  | 0.6745 | 1          | 0.6745 | 0 | 0 | 0 | 1 Ref      |
| MN552148 | Unassigned | Unassigned | Unassigned | 202_0   | Clustered           | 102 VC_202_0 | 102 | 0.4049 | 1          | 0.4049 | 0 | 0 | 0 | 0.7876 Ref |
| MN552149 | Unassigned | Unassigned | Unassigned | 202_0   | Clustered           | 102 VC_202_0 | 102 | 0.4049 | 1          | 0.4049 | 0 | 0 | 0 | 0.7876 Ref |
| MN552150 | Unassigned | Unassigned | Unassigned | 202_0   | Clustered           | 102 VC_202_0 | 102 | 0.4049 | 1          | 0.4049 | 0 | 0 | 0 | 0.7876 Ref |
| MN553583 | Unassigned | Unassigned | Unassigned | 838_0   | Clustered           | 29 VC_838_0  | 29  | 0.8611 | 1          | 0.8611 | 0 | 0 | 0 | 1 Ref      |
| MN553584 | Unassigned | Unassigned | Unassigned | 838_0   | Clustered           | 29 VC_838_0  | 29  | 0.8611 | 1          | 0.8611 | 0 | 0 | 0 | 1 Ref      |
| MN553585 | Unassigned | Unassigned | Unassigned | 423_0   | Clustered           | 45 VC_423_0  | 45  | 0.9484 | 1          | 0.9484 | 0 | 0 | 0 | 1 Ref      |
| MN553586 | Unassigned | Unassigned | Unassigned | 472_0   | Clustered           | 47 VC_472_0  | 47  | 0.9025 | 1          | 0.9025 | 0 | 0 | 0 | 1 Ref      |
| MN553587 | Unassigned | Unassigned | Unassigned | 423_0   | Clustered           | 45 VC_423_0  | 45  | 0.9484 | 1          | 0.9484 | 0 | 0 | 0 | 1 Ref      |
| MN553588 | Unassigned | Unassigned | Unassigned | 423_0   | Clustered           | 45 VC_423_0  | 45  | 0.9484 | 1          | 0.9484 | 0 | 0 | 0 | 1 Ref      |
| MN553589 | Unassigned | Unassigned | Unassigned | 423_0   | Clustered           | 45 VC_423_0  | 45  | 0.9484 | 1          | 0.9484 | 0 | 0 | 0 | 1 Ref      |
| MN562749 | Unassigned | Unassigned | Unassigned | 472_0   | Clustered           | 47 VC_472_0  | 47  | 0.9025 | 1          | 0.9025 | 0 | 0 | 0 | 1 Ref      |
| MN563783 | Unassigned | Unassigned | Unassigned | 80_0    | Clustered           | 41 VC_80_0   | 41  | 0.5837 | 1          | 0.5837 | 0 | 0 | 0 | 0.9805 Ref |
| MN563784 | Unassigned | Unassigned | Unassigned | 344_0   | Clustered           | 21 VC_344_0  | 21  | 0.5436 | 1          | 0.5436 | 0 | 0 | 0 | 1 Ref      |
| MN563785 | Unassigned | Unassigned | Unassigned | 76_0    | Clustered           | 37 VC_76_0   | 37  | 0.9403 | 1          | 0.9403 | 0 | 0 | 0 | 1 Ref      |
| MN563793 | Unassigned | Unassigned | Unassigned | 5_0     | Clustered           | 30 VC_5_0    | 30  | 0.9647 | 1          | 0.9647 | 0 | 0 | 0 | 1 Ref      |
| MN564818 | Unassigned | Unassigned | Unassigned | 80_0    | Clustered           | 41 VC_80_0   | 41  | 0.5837 | 1          | 0.5837 | 0 | 0 | 0 | 0.9805 Ref |
| MN580668 | Unassigned | Unassigned | Unassigned | 283_179 | Clustered/Singleton | 1 VC_283_179 | 1   | 0      | 1          | 0      | 0 | 0 | 0 | 1 Ref      |
| MN585130 | Unassigned | Unassigned | Unassigned | 823_0   | Clustered           | 124 VC_823_0 | 124 | 0.9492 | 1          | 0.9492 | 0 | 0 | 0 | 1 Ref      |
| MN585963 | Unassigned | Unassigned | Unassigned | 1176_0  | Clustered           | 41 VC_1176_0 | 41  | 0.9558 | 1          | 0.9558 | 0 | 0 | 0 | 0.9976 Ref |
| MN585964 | Unassigned | Unassigned | Unassigned | 556_0   | Clustered           | 21 VC_556_0  | 21  | 0.9912 | 1          | 0.9912 | 0 | 0 | 0 | 1 Ref      |



|          |            |            |            |        |                     |              |    |        |            |        |   |   |   |        |     |
|----------|------------|------------|------------|--------|---------------------|--------------|----|--------|------------|--------|---|---|---|--------|-----|
| MN585965 | Unassigned | Unassigned | Unassigned | 371_13 | Clustered           | 33 VC_371_13 | 33 | 0.179  | 1          | 0.179  | 0 | 0 | 0 | 0.8769 | Ref |
| MN585966 | Unassigned | Unassigned | Unassigned | 522_1  | Clustered           | 5 VC_522_1   | 5  | 0.1017 | 0.99999997 | 0.1017 | 0 | 0 | 0 | 0.8    | Ref |
| MN585967 | Unassigned | Unassigned | Unassigned | 371_1  | Clustered           | 11 VC_371_1  | 11 | 0.0379 | 1          | 0.0379 | 0 | 0 | 0 | 0.8545 | Ref |
| MN585968 | Unassigned | Unassigned | Unassigned | 216_2  | Clustered           | 2 VC_216_2   | 2  | 0.0139 | 0.95744997 | 0.0133 | 0 | 0 | 0 | 1      | Ref |
| MN585969 | Unassigned | Unassigned | Unassigned | 514_0  | Clustered           | 75 VC_514_0  | 75 | 0.9402 | 1          | 0.9402 | 0 | 0 | 0 | 1      | Ref |
| MN585970 | Unassigned | Unassigned | Unassigned | 325_20 | Clustered/Singleton | 1 VC_325_20  | 1  | 0      | 1          | 0      | 0 | 0 | 0 | 1      | Ref |
| MN585971 | Unassigned | Unassigned | Unassigned | 799_1  | Clustered           | 27 VC_799_1  | 27 | 0.8611 | 1          | 0.8611 | 0 | 0 | 0 | 1      | Ref |
| MN585972 | Unassigned | Unassigned | Unassigned | 1169_0 | Clustered           | 7 VC_1169_0  | 7  | 0.9811 | 0.99995613 | 0.981  | 0 | 0 | 0 | 1      | Ref |
| MN585973 | Unassigned | Unassigned | Unassigned | 520_31 | Clustered           | 11 VC_520_31 | 11 | 0.0897 | 1          | 0.0897 | 0 | 0 | 0 | 0.6    | Ref |
| MN585974 | Unassigned | Unassigned | Unassigned | 225_0  | Clustered           | 32 VC_225_0  | 32 | 0.848  | 1          | 0.848  | 0 | 0 | 0 | 0.996  | Ref |
| MN585975 | Unassigned | Unassigned | Unassigned | 520_89 | Clustered/Singleton | 1 VC_520_89  | 1  | 0      | 1          | 0      | 0 | 0 | 0 | 1      | Ref |
| MN585976 | Unassigned | Unassigned | Unassigned | 325_24 | Clustered           | 3 VC_325_24  | 3  | 0.009  | 0.99853949 | 0.009  | 0 | 0 | 0 | 1      | Ref |
| MN585977 | Unassigned | Unassigned | Unassigned | 519_0  | Clustered           | 39 VC_519_0  | 39 | 0.8156 | 1          | 0.8156 | 0 | 0 | 0 | 1      | Ref |
| MN585978 | Unassigned | Unassigned | Unassigned | 225_0  | Clustered           | 32 VC_225_0  | 32 | 0.848  | 1          | 0.848  | 0 | 0 | 0 | 0.996  | Ref |
| MN585979 | Unassigned | Unassigned | Unassigned | 225_0  | Clustered           | 32 VC_225_0  | 32 | 0.848  | 1          | 0.848  | 0 | 0 | 0 | 0.996  | Ref |
| MN585980 | Unassigned | Unassigned | Unassigned | 1352_0 | Clustered           | 31 VC_1352_0 | 31 | 0.849  | 1          | 0.849  | 0 | 0 | 0 | 1      | Ref |
| MN585981 | Unassigned | Unassigned | Unassigned | 216_6  | Clustered           | 42 VC_216_6  | 42 | 0.473  | 1          | 0.473  | 0 | 0 | 0 | 0.8351 | Ref |
| MN585982 | Unassigned | Unassigned | Unassigned | 799_1  | Clustered           | 27 VC_799_1  | 27 | 0.8611 | 1          | 0.8611 | 0 | 0 | 0 | 1      | Ref |
| MN585983 | Unassigned | Unassigned | Unassigned | 216_6  | Clustered           | 42 VC_216_6  | 42 | 0.473  | 1          | 0.473  | 0 | 0 | 0 | 0.8351 | Ref |
| MN585984 | Unassigned | Unassigned | Unassigned | 514_0  | Clustered           | 75 VC_514_0  | 75 | 0.9402 | 1          | 0.9402 | 0 | 0 | 0 | 1      | Ref |
| MN585985 | Unassigned | Unassigned | Unassigned | 325_37 | Clustered           | 3 VC_325_37  | 3  | 0.008  | 0.99634936 | 0.008  | 0 | 0 | 0 | 0.6667 | Ref |
| MN585986 | Unassigned | Unassigned | Unassigned | 1352_0 | Clustered           | 31 VC_1352_0 | 31 | 0.849  | 1          | 0.849  | 0 | 0 | 0 | 1      | Ref |
| MN585987 | Unassigned | Unassigned | Unassigned | 520_59 | Clustered           | 5 VC_520_59  | 5  | 0.0459 | 0.99999997 | 0.0459 | 0 | 0 | 0 | 1      | Ref |
| MN585988 | Unassigned | Unassigned | Unassigned | 799_1  | Clustered           | 27 VC_799_1  | 27 | 0.8611 | 1          | 0.8611 | 0 | 0 | 0 | 1      | Ref |
| MN585989 | Unassigned | Unassigned | Unassigned | 215_0  | Clustered           | 5 VC_215_0   | 5  | 0.0724 | 0.99999997 | 0.0724 | 0 | 0 | 0 | 1      | Ref |
| MN585990 | Unassigned | Unassigned | Unassigned | 1344_0 | Clustered           | 78 VC_1344_0 | 78 | 0.9732 | 1          | 0.9732 | 0 | 0 | 0 | 1      | Ref |
| MN585991 | Unassigned | Unassigned | Unassigned | 325_51 | Clustered           | 2 VC_325_51  | 2  | 0.0039 | 0.95663826 | 0.0037 | 0 | 0 | 0 | 1      | Ref |
| MN585992 | Unassigned | Unassigned | Unassigned | 764_0  | Clustered           | 4 VC_764_0   | 4  | 0.3556 | 0.99997469 | 0.3556 | 0 | 0 | 0 | 1      | Ref |
| MN585993 | Unassigned | Unassigned | Unassigned | 571_0  | Clustered           | 4 VC_571_0   | 4  | 0.1921 | 0.99998591 | 0.1921 | 0 | 0 | 0 | 1      | Ref |
| MN585994 | Unassigned | Unassigned | Unassigned | 225_0  | Clustered           | 32 VC_225_0  | 32 | 0.848  | 1          | 0.848  | 0 | 0 | 0 | 0.996  | Ref |
| MN585995 | Unassigned | Unassigned | Unassigned | 520_11 | Clustered/Singleton | 1 VC_520_11  | 1  | 0      | 1          | 0      | 0 | 0 | 0 | 1      | Ref |
| MN585996 | Unassigned | Unassigned | Unassigned | 799_1  | Clustered           | 27 VC_799_1  | 27 | 0.8611 | 1          | 0.8611 | 0 | 0 | 0 | 1      | Ref |
| MN585997 | Unassigned | Unassigned | Unassigned | 325_56 | Clustered           | 2 VC_325_56  | 2  | 0.0036 | 0.94604798 | 0.0034 | 0 | 0 | 0 | 0      | Ref |
| MN585998 | Unassigned | Unassigned | Unassigned | 216_6  | Clustered           | 42 VC_216_6  | 42 | 0.473  | 1          | 0.473  | 0 | 0 | 0 | 0.8351 | Ref |
| MN585999 | Unassigned | Unassigned | Unassigned | 325_5  | Clustered           | 11 VC_325_5  | 11 | 0.047  | 1          | 0.047  | 0 | 0 | 0 | 0.7636 | Ref |
| MN586000 | Unassigned | Unassigned | Unassigned | 325_35 | Clustered           | 17 VC_325_35 | 17 | 0.0732 | 1          | 0.0732 | 0 | 0 | 0 | 0.7721 | Ref |
| MN586001 | Unassigned | Unassigned | Unassigned | 520_18 | Clustered/Singleton | 1 VC_520_18  | 1  | 0      | 1          | 0      | 0 | 0 | 0 | 1      | Ref |
| MN586002 | Unassigned | Unassigned | Unassigned | 216_2  | Clustered           | 2 VC_216_2   | 2  | 0.0139 | 0.95744997 | 0.0133 | 0 | 0 | 0 | 1      | Ref |
| MN586003 | Unassigned | Unassigned | Unassigned | 572_0  | Clustered           | 16 VC_572_0  | 16 | 0.7286 | 1          | 0.7286 | 0 | 0 | 0 | 1      | Ref |
| MN586004 | Unassigned | Unassigned | Unassigned | 520_6  | Clustered           | 3 VC_520_6   | 3  | 0.0276 | 0.99859841 | 0.0276 | 0 | 0 | 0 | 1      | Ref |
| MN586005 | Unassigned | Unassigned | Unassigned | 520_59 | Clustered           | 5 VC_520_59  | 5  | 0.0459 | 0.99999997 | 0.0459 | 0 | 0 | 0 | 1      | Ref |
| MN586006 | Unassigned | Unassigned | Unassigned | 221_0  | Clustered           | 22 VC_221_0  | 22 | 0.7447 | 1          | 0.7447 | 0 | 0 | 0 | 1      | Ref |
| MN586007 | Unassigned | Unassigned | Unassigned | 1352_0 | Clustered           | 31 VC_1352_0 | 31 | 0.849  | 1          | 0.849  | 0 | 0 | 0 | 1      | Ref |
| MN586008 | Unassigned | Unassigned | Unassigned | 1344_0 | Clustered           | 78 VC_1344_0 | 78 | 0.9732 | 1          | 0.9732 | 0 | 0 | 0 | 1      | Ref |
| MN586009 | Unassigned | Unassigned | Unassigned | 982_0  | Clustered           | 62 VC_982_0  | 62 | 0.8646 | 1          | 0.8646 | 0 | 0 | 0 | 0.743  | Ref |
| MN586010 | Unassigned | Unassigned | Unassigned | 1344_0 | Clustered           | 78 VC_1344_0 | 78 | 0.9732 | 1          | 0.9732 | 0 | 0 | 0 | 1      | Ref |
| MN586011 | Unassigned | Unassigned | Unassigned | 520_41 | Clustered           | 2 VC_520_41  | 2  | 0.0139 | 0.95761457 | 0.0134 | 0 | 0 | 0 | 1      | Ref |
| MN586012 | Unassigned | Unassigned | Unassigned | 520_66 | Clustered/Singleton | 1 VC_520_66  | 1  | 0      | 1          | 0      | 0 | 0 | 0 | 1      | Ref |
| MN586013 | Unassigned | Unassigned | Unassigned | 551_0  | Clustered           | 16 VC_551_0  | 16 | 0.0915 | 1          | 0.0915 | 0 | 0 | 0 | 0.6667 | Ref |
| MN586014 | Unassigned | Unassigned | Unassigned | 1183_0 | Clustered           | 6 VC_1183_0  | 6  | 0.995  | 0.99996974 | 0.995  | 0 | 0 | 0 | 1      | Ref |
| MN586015 | Unassigned | Unassigned | Unassigned | 919_0  | Clustered           | 39 VC_919_0  | 39 | 0.9069 | 1          | 0.9069 | 0 | 0 | 0 | 1      | Ref |
| MN586016 | Unassigned | Unassigned | Unassigned | 940_0  | Clustered           | 34 VC_940_0  | 34 | 0.7959 | 1          | 0.7959 | 0 | 0 | 0 | 1      | Ref |
| MN586017 | Unassigned | Unassigned | Unassigned | 551_7  | Clustered           | 28 VC_551_7  | 28 | 0.1661 | 1          | 0.1661 | 0 | 0 | 0 | 0.8519 | Ref |
| MN586018 | Unassigned | Unassigned | Unassigned | 887_0  | Clustered           | 18 VC_887_0  | 18 | 0.3663 | 1          | 0.3663 | 0 | 0 | 0 | 1      | Ref |
| MN586019 | Unassigned | Unassigned | Unassigned | 551_7  | Clustered           | 28 VC_551_7  | 28 | 0.1661 | 1          | 0.1661 | 0 | 0 | 0 | 0.8519 | Ref |
| MN586021 | Unassigned | Unassigned | Unassigned | 1170_0 | Clustered           | 3 VC_1170_0  | 3  | 0.3275 | 0.99834213 | 0.327  | 0 | 0 | 0 | 1      | Ref |
| MN586022 | Unassigned | Unassigned | Unassigned | 1096_0 | Clustered           | 5 VC_1096_0  | 5  | 0.8566 | 0.99869977 | 0.8555 | 0 | 0 | 0 | 1      | Ref |
| MN586023 | Unassigned | Unassigned | Unassigned | 887_0  | Clustered           | 18 VC_887_0  | 18 | 0.3663 | 1          | 0.3663 | 0 | 0 | 0 | 1      | Ref |
| MN586024 | Unassigned | Unassigned | Unassigned | 763_1  | Clustered           | 9 VC_763_1   | 9  | 0.3706 | 1          | 0.3706 | 0 | 0 | 0 | 1      | Ref |
| MN586026 | Unassigned | Unassigned | Unassigned | 1095_0 | Clustered           | 16 VC_1095_0 | 16 | 0.458  | 1          | 0.458  | 0 | 0 | 0 | 1      | Ref |
| MN586027 | Unassigned | Unassigned | Unassigned | 1370_0 | Clustered           | 2 VC_1370_0  | 2  | 0.8214 | 0.91237788 | 0.7494 | 0 | 0 | 0 | 1      | Ref |
| MN586028 | Unassigned | Unassigned | Unassigned | 1095_0 | Clustered           | 16 VC_1095_0 | 16 | 0.458  | 1          | 0.458  | 0 | 0 | 0 | 1      | Ref |
| MN586029 | Unassigned | Unassigned | Unassigned | 546_1  | Clustered           | 2 VC_546_1   | 2  | 0.0136 | 0.68405151 | 0.0093 | 0 | 0 | 0 | 1      | Ref |
| MN586030 | Unassigned | Unassigned | Unassigned | 888_0  | Clustered           | 28 VC_888_0  | 28 | 0.5497 | 1          | 0.5497 | 0 | 0 | 0 | 1      | Ref |
| MN586031 | Unassigned | Unassigned | Unassigned | 1176_0 | Clustered           | 41 VC_1176_0 | 41 | 0.9558 | 1          | 0.9558 | 0 | 0 | 0 | 0.9976 | Ref |
| MN586032 | Unassigned | Unassigned | Unassigned | 551_2  | Clustered           | 17 VC_551_2  | 17 | 0.0973 | 1          | 0.0973 | 0 | 0 | 0 | 0.9779 | Ref |
| MN586034 | Unassigned | Unassigned | Unassigned | 551_6  | Clustered           | 22 VC_551_6  | 22 | 0.1214 | 1          | 0.1214 | 0 | 0 | 0 | 0.8095 | Ref |
| MN586035 | Unassigned | Unassigned | Unassigned | 551_7  | Clustered           | 28 VC_551_7  | 28 | 0.1661 | 1          | 0.1661 | 0 | 0 | 0 | 0.8519 | Ref |
| MN586036 | Unassigned | Unassigned | Unassigned | 919_0  | Clustered           | 39 VC_919_0  | 39 | 0.9069 | 1          | 0.9069 | 0 | 0 | 0 | 1      | Ref |
| MN586037 | Unassigned | Unassigned | Unassigned | 551_6  | Clustered           | 22 VC_551_6  | 22 | 0.1214 | 1          | 0.1214 | 0 | 0 | 0 | 0.8095 | Ref |
| MN586038 | Unassigned | Unassigned | Unassigned | 515_0  | Clustered           | 16 VC_515_0  | 16 | 0.3793 | 1          | 0.3793 | 0 | 0 | 0 | 1      | Ref |
| MN586039 | Unassigned | Unassigned | Unassigned | 223_0  | Clustered           | 38 VC_223_0  | 38 | 0.9095 | 1          | 0.9095 | 0 | 0 | 0 | 1      | Ref |
| MN586041 | Unassigned | Unassigned | Unassigned | 551_7  | Clustered           | 28 VC_551_7  | 28 | 0.1661 | 1          | 0.1661 | 0 | 0 | 0 | 0.8519 | Ref |
| MN586042 | Unassigned | Unassigned | Unassigned | 1352_0 | Clustered           | 31 VC_1352_0 | 31 | 0.849  | 1          | 0.849  | 0 | 0 | 0 | 1      | Ref |
| MN586043 | Unassigned | Unassigned | Unassigned | 551_1  | Clustered           | 4 VC_551_1   | 4  | 0.0159 | 0.99968337 | 0.0159 | 0 | 0 | 0 | 0.6667 | Ref |
| MN586044 | Unassigned | Unassigned | Unassigned | 551_1  | Clustered           | 4 VC_551_1   | 4  | 0.0159 | 0.99968337 | 0.0159 | 0 | 0 | 0 | 0.6667 | Ref |
| MN586045 | Unassigned | Unassigned | Unassigned | 508_0  | Clustered           | 32 VC_508_0  | 32 | 0.906  | 1          | 0.906  | 0 | 0 | 0 | 1      | Ref |
| MN586046 | Unassigned | Unassigned | Unassigned | 508_0  | Clustered           | 32 VC_508_0  | 32 | 0.906  | 1          | 0.906  | 0 | 0 | 0 | 1      | Ref |
| MN586047 | Unassigned | Unassigned | Unassigned | 1095_0 | Clustered           | 16 VC_1095_0 | 16 | 0.458  | 1          | 0.458  | 0 | 0 | 0 | 1      | Ref |
| MN586048 | Unassigned | Unassigned | Unassigned | 514_0  | Clustered           | 75 VC_514_0  | 75 | 0.9402 | 1          | 0.9402 | 0 | 0 | 0 | 1      | Ref |
| MN586049 | Unassigned | Unassigned | Unassigned | 919_0  | Clustered           | 39 VC_919_0  | 39 | 0.9069 | 1          | 0.9069 | 0 | 0 | 0 | 1      | Ref |



|          |            |            |            |        |                     |              |     |        |            |        |   |   |   |        |     |
|----------|------------|------------|------------|--------|---------------------|--------------|-----|--------|------------|--------|---|---|---|--------|-----|
| MN586050 | Unassigned | Unassigned | Unassigned | 551_7  | Clustered           | 28 VC_551_7  | 28  | 0.1661 | 1          | 0.1661 | 0 | 0 | 0 | 0.8519 | Ref |
| MN586051 | Unassigned | Unassigned | Unassigned | 551_2  | Clustered           | 17 VC_551_2  | 17  | 0.0973 | 1          | 0.0973 | 0 | 0 | 0 | 0.9779 | Ref |
| MN586052 | Unassigned | Unassigned | Unassigned | 888_0  | Clustered           | 28 VC_888_0  | 28  | 0.5497 | 1          | 0.5497 | 0 | 0 | 0 | 1      | Ref |
| MN586053 | Unassigned | Unassigned | Unassigned | 1179_0 | Clustered           | 3 VC_1179_0  | 3   | 0.7588 | 0.96819872 | 0.7347 | 0 | 0 | 0 | 1      | Ref |
| MN586054 | Unassigned | Unassigned | Unassigned | 872_0  | Clustered           | 31 VC_872_0  | 31  | 0.8151 | 1          | 0.8151 | 0 | 0 | 0 | 0.8194 | Ref |
| MN586055 | Unassigned | Unassigned | Unassigned | 1175_0 | Clustered           | 22 VC_1175_0 | 22  | 0.4562 | 1          | 0.4562 | 0 | 0 | 0 | 1      | Ref |
| MN586056 | Unassigned | Unassigned | Unassigned | 872_0  | Clustered           | 31 VC_872_0  | 31  | 0.8151 | 1          | 0.8151 | 0 | 0 | 0 | 0.8194 | Ref |
| MN586057 | Unassigned | Unassigned | Unassigned | 919_0  | Clustered           | 39 VC_919_0  | 39  | 0.9069 | 1          | 0.9069 | 0 | 0 | 0 | 1      | Ref |
| MN586058 | Unassigned | Unassigned | Unassigned | 371_1  | Clustered           | 11 VC_371_1  | 11  | 0.0379 | 1          | 0.0379 | 0 | 0 | 0 | 0.8545 | Ref |
| MN586059 | Unassigned | Unassigned | Unassigned | 1352_0 | Clustered           | 31 VC_1352_0 | 31  | 0.849  | 1          | 0.849  | 0 | 0 | 0 | 1      | Ref |
| MN586060 | Unassigned | Unassigned | Unassigned | 940_0  | Clustered           | 34 VC_940_0  | 34  | 0.7959 | 1          | 0.7959 | 0 | 0 | 0 | 1      | Ref |
| MN586061 | Unassigned | Unassigned | Unassigned | 1160_0 | Clustered           | 73 VC_1160_0 | 73  | 0.9835 | 1          | 0.9835 | 0 | 0 | 0 | 1      | Ref |
| MN586062 | Unassigned | Unassigned | Unassigned | 940_0  | Clustered           | 34 VC_940_0  | 34  | 0.7959 | 1          | 0.7959 | 0 | 0 | 0 | 1      | Ref |
| MN586063 | Unassigned | Unassigned | Unassigned | 513_0  | Clustered           | 32 VC_513_0  | 32  | 0.6881 | 1          | 0.6881 | 0 | 0 | 0 | 1      | Ref |
| MN592896 | Unassigned | Unassigned | Unassigned | 925_0  | Clustered/Singleton | 1 VC_925_0   | 1   | 0      | 1          | 0      | 0 | 0 | 0 | 1      | Ref |
| MN592897 | Unassigned | Unassigned | Unassigned | 296_0  | Clustered           | 6 VC_296_0   | 6   | 0.5315 | 1          | 0.5315 | 0 | 0 | 0 | 1      | Ref |
| MN602045 | Unassigned | Unassigned | Unassigned | 423_0  | Clustered           | 45 VC_423_0  | 45  | 0.9484 | 1          | 0.9484 | 0 | 0 | 0 | 1      | Ref |
| MN602266 | Unassigned | Unassigned | Unassigned | 936_0  | Clustered           | 2 VC_936_0   | 2   | 0.9284 | 0.81445332 | 0.7561 | 0 | 0 | 0 | 1      | Ref |
| MN602267 | Unassigned | Unassigned | Unassigned | 936_0  | Clustered           | 2 VC_936_0   | 2   | 0.9284 | 0.81445332 | 0.7561 | 0 | 0 | 0 | 1      | Ref |
| MN602268 | Unassigned | Unassigned | Unassigned | 977_1  | Clustered           | 2 VC_977_1   | 2   | 0.079  | 0.93977186 | 0.0743 | 0 | 0 | 0 | 1      | Ref |
| MN604053 | Unassigned | Unassigned | Unassigned | 591_0  | Clustered           | 14 VC_591_0  | 14  | 0.5184 | 1          | 0.5184 | 0 | 0 | 0 | 1      | Ref |
| MN604230 | Unassigned | Unassigned | Unassigned | 144_0  | Clustered           | 2 VC_144_0   | 2   | 0.4237 | 0.94768242 | 0.4015 | 0 | 0 | 0 | 1      | Ref |
| MN604238 | Unassigned | Unassigned | Unassigned | 699_0  | Clustered           | 71 VC_699_0  | 71  | 0.9352 | 1          | 0.9352 | 0 | 0 | 0 | 1      | Ref |
| MN604239 | Unassigned | Unassigned | Unassigned | 699_0  | Clustered           | 71 VC_699_0  | 71  | 0.9352 | 1          | 0.9352 | 0 | 0 | 0 | 1      | Ref |
| MN604407 | Unassigned | Unassigned | Unassigned | 328_0  | Clustered           | 11 VC_328_0  | 11  | 0.4707 | 1          | 0.4707 | 0 | 0 | 0 | 1      | Ref |
| MN604698 | Unassigned | Unassigned | Unassigned | 144_0  | Clustered           | 2 VC_144_0   | 2   | 0.4237 | 0.94768242 | 0.4015 | 0 | 0 | 0 | 1      | Ref |
| MN614471 | Unassigned | Unassigned | Unassigned | 699_0  | Clustered           | 71 VC_699_0  | 71  | 0.9352 | 1          | 0.9352 | 0 | 0 | 0 | 1      | Ref |
| MN615698 | Unassigned | Unassigned | Unassigned | 423_0  | Clustered           | 45 VC_423_0  | 45  | 0.9484 | 1          | 0.9484 | 0 | 0 | 0 | 1      | Ref |
| MN615699 | Unassigned | Unassigned | Unassigned | 423_0  | Clustered           | 45 VC_423_0  | 45  | 0.9484 | 1          | 0.9484 | 0 | 0 | 0 | 1      | Ref |
| MN615700 | Unassigned | Unassigned | Unassigned | 79_7   | Clustered           | 33 VC_79_7   | 33  | 0.216  | 1          | 0.216  | 0 | 0 | 0 | 0.8409 | Ref |
| MN615701 | Unassigned | Unassigned | Unassigned | 79_7   | Clustered           | 33 VC_79_7   | 33  | 0.216  | 1          | 0.216  | 0 | 0 | 0 | 0.8409 | Ref |
| MN615702 | Unassigned | Unassigned | Unassigned | 79_7   | Clustered           | 33 VC_79_7   | 33  | 0.216  | 1          | 0.216  | 0 | 0 | 0 | 0.8409 | Ref |
| MN617773 | Unassigned | Unassigned | Unassigned | 450_0  | Clustered           | 16 VC_450_0  | 16  | 0.9564 | 1          | 0.9564 | 0 | 0 | 0 | 1      | Ref |
| MN617840 | Unassigned | Unassigned | Unassigned | 1240_0 | Clustered           | 82 VC_1240_0 | 82  | 0.7945 | 1          | 0.7945 | 0 | 0 | 0 | 1      | Ref |
| MN617841 | Unassigned | Unassigned | Unassigned | 887_0  | Clustered           | 18 VC_887_0  | 18  | 0.3663 | 1          | 0.3663 | 0 | 0 | 0 | 1      | Ref |
| MN617842 | Unassigned | Unassigned | Unassigned | 950_0  | Clustered           | 38 VC_950_0  | 38  | 0.9443 | 1          | 0.9443 | 0 | 0 | 0 | 1      | Ref |
| MN617843 | Unassigned | Unassigned | Unassigned | 372_2  | Clustered           | 5 VC_372_2   | 5   | 0.072  | 0.99999997 | 0.072  | 0 | 0 | 0 | 0.9    | Ref |
| MN617844 | Unassigned | Unassigned | Unassigned | 940_0  | Clustered           | 34 VC_940_0  | 34  | 0.7959 | 1          | 0.7959 | 0 | 0 | 0 | 1      | Ref |
| MN617845 | Unassigned | Unassigned | Unassigned | 325_1  | Clustered           | 2 VC_325_1   | 2   | 0.0043 | 0.95663348 | 0.0041 | 0 | 0 | 0 | 1      | Ref |
| MN642089 | Unassigned | Unassigned | Unassigned | 442_1  | Clustered           | 3 VC_442_1   | 3   | 0.0538 | 0.99419552 | 0.0535 | 0 | 0 | 0 | 1      | Ref |
| MN648195 | Unassigned | Unassigned | Unassigned | 492_1  | Clustered           | 20 VC_492_1  | 20  | 0.4176 | 1          | 0.4176 | 0 | 0 | 0 | 1      | Ref |
| MN648445 | Unassigned | Unassigned | Unassigned | 286_17 | Clustered           | 8 VC_286_17  | 8   | 0.0535 | 0.99997829 | 0.0535 | 0 | 0 | 0 | 0.6071 | Ref |
| MN651570 | Unassigned | Unassigned | Unassigned | 699_0  | Clustered           | 71 VC_699_0  | 71  | 0.9352 | 1          | 0.9352 | 0 | 0 | 0 | 1      | Ref |
| MN655998 | Unassigned | Unassigned | Unassigned | 590_0  | Clustered           | 27 VC_590_0  | 27  | 0.9947 | 1          | 0.9947 | 0 | 0 | 0 | 1      | Ref |
| MN655999 | Unassigned | Unassigned | Unassigned | 329_11 | Clustered           | 15 VC_329_11 | 15  | 0.0791 | 1          | 0.0791 | 0 | 0 | 0 | 0.9333 | Ref |
| MN656993 | Unassigned | Unassigned | Unassigned | 836_0  | Clustered           | 9 VC_836_0   | 9   | 0.7733 | 1          | 0.7733 | 0 | 0 | 0 | 1      | Ref |
| MN662249 | Unassigned | Unassigned | Unassigned | 492_1  | Clustered           | 20 VC_492_1  | 20  | 0.4176 | 1          | 0.4176 | 0 | 0 | 0 | 1      | Ref |
| MN688132 | Unassigned | Unassigned | Unassigned | 33_0   | Clustered           | 4 VC_33_0    | 4   | 0.06   | 0.99994826 | 0.06   | 0 | 0 | 0 | 1      | Ref |
| MN689503 | Unassigned | Unassigned | Unassigned | 690_0  | Clustered           | 50 VC_690_0  | 50  | 0.9805 | 1          | 0.9805 | 0 | 0 | 0 | 1      | Ref |
| MN689504 | Unassigned | Unassigned | Unassigned | 690_0  | Clustered           | 50 VC_690_0  | 50  | 0.9805 | 1          | 0.9805 | 0 | 0 | 0 | 1      | Ref |
| MN689505 | Unassigned | Unassigned | Unassigned | 690_0  | Clustered           | 50 VC_690_0  | 50  | 0.9805 | 1          | 0.9805 | 0 | 0 | 0 | 1      | Ref |
| MN689506 | Unassigned | Unassigned | Unassigned | 690_0  | Clustered           | 50 VC_690_0  | 50  | 0.9805 | 1          | 0.9805 | 0 | 0 | 0 | 1      | Ref |
| MN689507 | Unassigned | Unassigned | Unassigned | 690_0  | Clustered           | 50 VC_690_0  | 50  | 0.9805 | 1          | 0.9805 | 0 | 0 | 0 | 1      | Ref |
| MN689508 | Unassigned | Unassigned | Unassigned | 690_0  | Clustered           | 50 VC_690_0  | 50  | 0.9805 | 1          | 0.9805 | 0 | 0 | 0 | 1      | Ref |
| MN689509 | Unassigned | Unassigned | Unassigned | 260_0  | Clustered           | 13 VC_260_0  | 13  | 0.3705 | 1          | 0.3705 | 0 | 0 | 0 | 1      | Ref |
| MN689510 | Unassigned | Unassigned | Unassigned | 690_0  | Clustered           | 50 VC_690_0  | 50  | 0.9805 | 1          | 0.9805 | 0 | 0 | 0 | 1      | Ref |
| MN689511 | Unassigned | Unassigned | Unassigned | 690_0  | Clustered           | 50 VC_690_0  | 50  | 0.9805 | 1          | 0.9805 | 0 | 0 | 0 | 1      | Ref |
| MN689512 | Unassigned | Unassigned | Unassigned | 690_0  | Clustered           | 50 VC_690_0  | 50  | 0.9805 | 1          | 0.9805 | 0 | 0 | 0 | 1      | Ref |
| MN689513 | Unassigned | Unassigned | Unassigned | 690_0  | Clustered           | 50 VC_690_0  | 50  | 0.9805 | 1          | 0.9805 | 0 | 0 | 0 | 1      | Ref |
| MN689514 | Unassigned | Unassigned | Unassigned | 202_0  | Clustered           | 102 VC_202_0 | 102 | 0.4049 | 1          | 0.4049 | 0 | 0 | 0 | 0.7876 | Ref |
| MN689515 | Unassigned | Unassigned | Unassigned | 690_0  | Clustered           | 50 VC_690_0  | 50  | 0.9805 | 1          | 0.9805 | 0 | 0 | 0 | 1      | Ref |
| MN689516 | Unassigned | Unassigned | Unassigned | 260_0  | Clustered           | 13 VC_260_0  | 13  | 0.3705 | 1          | 0.3705 | 0 | 0 | 0 | 1      | Ref |
| MN689517 | Unassigned | Unassigned | Unassigned | 202_0  | Clustered           | 102 VC_202_0 | 102 | 0.4049 | 1          | 0.4049 | 0 | 0 | 0 | 0.7876 | Ref |
| MN689518 | Unassigned | Unassigned | Unassigned | 202_0  | Clustered           | 102 VC_202_0 | 102 | 0.4049 | 1          | 0.4049 | 0 | 0 | 0 | 0.7876 | Ref |
| MN689519 | Unassigned | Unassigned | Unassigned | 202_0  | Clustered           | 102 VC_202_0 | 102 | 0.4049 | 1          | 0.4049 | 0 | 0 | 0 | 0.7876 | Ref |
| MN689520 | Unassigned | Unassigned | Unassigned | 202_0  | Clustered           | 102 VC_202_0 | 102 | 0.4049 | 1          | 0.4049 | 0 | 0 | 0 | 0.7876 | Ref |
| MN689521 | Unassigned | Unassigned | Unassigned | 260_0  | Clustered           | 13 VC_260_0  | 13  | 0.3705 | 1          | 0.3705 | 0 | 0 | 0 | 1      | Ref |
| MN689522 | Unassigned | Unassigned | Unassigned | 202_0  | Clustered           | 102 VC_202_0 | 102 | 0.4049 | 1          | 0.4049 | 0 | 0 | 0 | 0.7876 | Ref |
| MN689523 | Unassigned | Unassigned | Unassigned | 202_0  | Clustered           | 102 VC_202_0 | 102 | 0.4049 | 1          | 0.4049 | 0 | 0 | 0 | 0.7876 | Ref |
| MN689524 | Unassigned | Unassigned | Unassigned | 202_0  | Clustered           | 102 VC_202_0 | 102 | 0.4049 | 1          | 0.4049 | 0 | 0 | 0 | 0.7876 | Ref |
| MN689525 | Unassigned | Unassigned | Unassigned | 202_0  | Clustered           | 102 VC_202_0 | 102 | 0.4049 | 1          | 0.4049 | 0 | 0 | 0 | 0.7876 | Ref |
| MN689526 | Unassigned | Unassigned | Unassigned | 690_0  | Clustered           | 50 VC_690_0  | 50  | 0.9805 | 1          | 0.9805 | 0 | 0 | 0 | 1      | Ref |
| MN689527 | Unassigned | Unassigned | Unassigned | 690_0  | Clustered           | 50 VC_690_0  | 50  | 0.9805 | 1          | 0.9805 | 0 | 0 | 0 | 1      | Ref |
| MN689528 | Unassigned | Unassigned | Unassigned | 690_0  | Clustered           | 50 VC_690_0  | 50  | 0.9805 | 1          | 0.9805 | 0 | 0 | 0 | 1      | Ref |
| MN689529 | Unassigned | Unassigned | Unassigned | 690_0  | Clustered           | 50 VC_690_0  | 50  | 0.9805 | 1          | 0.9805 | 0 | 0 | 0 | 1      | Ref |
| MN689530 | Unassigned | Unassigned | Unassigned | 260_0  | Clustered           | 13 VC_260_0  | 13  | 0.3705 | 1          | 0.3705 | 0 | 0 | 0 | 1      | Ref |
| MN689531 | Unassigned | Unassigned | Unassigned | 690_0  | Clustered           | 50 VC_690_0  | 50  | 0.9805 | 1          | 0.9805 | 0 | 0 | 0 | 1      | Ref |
| MN689532 | Unassigned | Unassigned | Unassigned | 690_0  | Clustered           | 50 VC_690_0  | 50  | 0.9805 | 1          | 0.9805 | 0 | 0 | 0 | 1      | Ref |
| MN689533 | Unassigned | Unassigned | Unassigned | 690_0  | Clustered           | 50 VC_690_0  | 50  | 0.9805 | 1          | 0.9805 | 0 | 0 | 0 | 1      | Ref |
| MN689778 | Unassigned | Unassigned | Unassigned | 123_0  | Clustered           | 23 VC_123_0  | 23  | 0.817  | 1          | 0.817  | 0 | 0 | 0 | 1      | Ref |
| MN689779 | Unassigned | Unassigned | Unassigned | 938_0  | Clustered           | 99 VC_938_0  | 99  | 0.9119 | 1          | 0.9119 | 0 | 0 | 0 | 0.9928 | Ref |



|          |            |            |            |         |                     |              |     |        |            |        |   |   |   |            |
|----------|------------|------------|------------|---------|---------------------|--------------|-----|--------|------------|--------|---|---|---|------------|
| MN690600 | Unassigned | Unassigned | Unassigned | 16_0    | Clustered           | 12 VC_16_0   | 12  | 0.6615 | 1          | 0.6615 | 0 | 0 | 0 | 1 Ref      |
| MN692672 | Unassigned | Unassigned | Unassigned | 423_0   | Clustered           | 45 VC_423_0  | 45  | 0.9484 | 1          | 0.9484 | 0 | 0 | 0 | 1 Ref      |
| MN692673 | Unassigned | Unassigned | Unassigned | 461_0   | Clustered           | 96 VC_461_0  | 96  | 0.9307 | 1          | 0.9307 | 0 | 0 | 0 | 0.9575 Ref |
| MN695334 | Unassigned | Unassigned | Unassigned | 432_0   | Clustered           | 2 VC_432_0   | 2   | 0.0362 | 0.95680396 | 0.0346 | 0 | 0 | 0 | 1 Ref      |
| MN695335 | Unassigned | Unassigned | Unassigned | 432_0   | Clustered           | 2 VC_432_0   | 2   | 0.0362 | 0.95680396 | 0.0346 | 0 | 0 | 0 | 1 Ref      |
| MN698239 | Unassigned | Unassigned | Unassigned | 470_0   | Clustered           | 3 VC_470_0   | 3   | 0.5552 | 0.99823354 | 0.5543 | 0 | 0 | 0 | 1 Ref      |
| MN698240 | Unassigned | Unassigned | Unassigned | 1003_0  | Clustered           | 4 VC_1003_0  | 4   | 0.8718 | 0.99983781 | 0.8716 | 0 | 0 | 0 | 1 Ref      |
| MN698241 | Unassigned | Unassigned | Unassigned | 470_0   | Clustered           | 3 VC_470_0   | 3   | 0.5552 | 0.99823354 | 0.5543 | 0 | 0 | 0 | 1 Ref      |
| MN698242 | Unassigned | Unassigned | Unassigned | 485_0   | Clustered           | 3 VC_485_0   | 3   | 0.2389 | 0.99844364 | 0.2385 | 0 | 0 | 0 | 1 Ref      |
| MN698243 | Unassigned | Unassigned | Unassigned | 485_0   | Clustered           | 3 VC_485_0   | 3   | 0.2389 | 0.99844364 | 0.2385 | 0 | 0 | 0 | 1 Ref      |
| MN698245 | Unassigned | Unassigned | Unassigned | 1003_0  | Clustered           | 4 VC_1003_0  | 4   | 0.8718 | 0.99983781 | 0.8716 | 0 | 0 | 0 | 1 Ref      |
| MN698246 | Unassigned | Unassigned | Unassigned | 1003_0  | Clustered           | 4 VC_1003_0  | 4   | 0.8718 | 0.99983781 | 0.8716 | 0 | 0 | 0 | 1 Ref      |
| MN698247 | Unassigned | Unassigned | Unassigned | 485_0   | Clustered           | 3 VC_485_0   | 3   | 0.2389 | 0.99844364 | 0.2385 | 0 | 0 | 0 | 1 Ref      |
| MN698248 | Unassigned | Unassigned | Unassigned | 1003_0  | Clustered           | 4 VC_1003_0  | 4   | 0.8718 | 0.99983781 | 0.8716 | 0 | 0 | 0 | 1 Ref      |
| MN703405 | Unassigned | Unassigned | Unassigned | 221_0   | Clustered           | 22 VC_221_0  | 22  | 0.7447 | 1          | 0.7447 | 0 | 0 | 0 | 1 Ref      |
| MN703406 | Unassigned | Unassigned | Unassigned | 888_0   | Clustered           | 28 VC_888_0  | 28  | 0.5497 | 1          | 0.5497 | 0 | 0 | 0 | 1 Ref      |
| MN703407 | Unassigned | Unassigned | Unassigned | 1345_0  | Clustered           | 2 VC_1345_0  | 2   | 0.1133 | 0.95579173 | 0.1083 | 0 | 0 | 0 | 1 Ref      |
| MN703408 | Unassigned | Unassigned | Unassigned | 217_0   | Clustered           | 5 VC_217_0   | 5   | 0.069  | 0.99999998 | 0.069  | 0 | 0 | 0 | 1 Ref      |
| MN703409 | Unassigned | Unassigned | Unassigned | 1166_0  | Clustered           | 20 VC_1166_0 | 20  | 0.99   | 1          | 0.99   | 0 | 0 | 0 | 1 Ref      |
| MN703410 | Unassigned | Unassigned | Unassigned | 888_0   | Clustered           | 28 VC_888_0  | 28  | 0.5497 | 1          | 0.5497 | 0 | 0 | 0 | 1 Ref      |
| MN703411 | Unassigned | Unassigned | Unassigned | 1074_0  | Clustered           | 19 VC_1074_0 | 19  | 0.9198 | 1          | 0.9198 | 0 | 0 | 0 | 1 Ref      |
| MN703412 | Unassigned | Unassigned | Unassigned | 1164_0  | Clustered           | 25 VC_1164_0 | 25  | 0.7312 | 1          | 0.7312 | 0 | 0 | 0 | 1 Ref      |
| MN703413 | Unassigned | Unassigned | Unassigned | 1207_0  | Clustered           | 29 VC_1207_0 | 29  | 0.8225 | 1          | 0.8225 | 0 | 0 | 0 | 1 Ref      |
| MN703414 | Unassigned | Unassigned | Unassigned | 1345_0  | Clustered           | 2 VC_1345_0  | 2   | 0.1133 | 0.95579173 | 0.1083 | 0 | 0 | 0 | 1 Ref      |
| MN703415 | Unassigned | Unassigned | Unassigned | 371_20  | Clustered/Singleton | 1 VC_371_20  | 1   | 0      | 1          | 0      | 0 | 0 | 0 | 1 Ref      |
| MN709127 | Unassigned | Unassigned | Unassigned | 590_0   | Clustered           | 27 VC_590_0  | 27  | 0.9947 | 1          | 0.9947 | 0 | 0 | 0 | 1 Ref      |
| MN709128 | Unassigned | Unassigned | Unassigned | 492_1   | Clustered           | 20 VC_492_1  | 20  | 0.4176 | 1          | 0.4176 | 0 | 0 | 0 | 1 Ref      |
| MN710383 | Unassigned | Unassigned | Unassigned | 589_0   | Clustered           | 2 VC_589_0   | 2   | 1      | 1          | 1      | 0 | 0 | 0 | 1 Ref      |
| MN715150 | Unassigned | Unassigned | Unassigned | 451_0   | Clustered           | 80 VC_451_0  | 80  | 0.9991 | 1          | 0.9991 | 0 | 0 | 0 | 1 Ref      |
| MN715356 | Unassigned | Unassigned | Unassigned | 813_1   | Clustered           | 24 VC_813_1  | 24  | 0.535  | 1          | 0.535  | 0 | 0 | 0 | 1 Ref      |
| MN716856 | Unassigned | Unassigned | Unassigned | 283_131 | Clustered/Singleton | 1 VC_283_131 | 1   | 0      | 1          | 0      | 0 | 0 | 0 | 1 Ref      |
| MN718463 | Unassigned | Unassigned | Unassigned | 766_0   | Clustered           | 2 VC_766_0   | 2   | 0.2674 | 0.94916107 | 0.2538 | 0 | 0 | 0 | 1 Ref      |
| MN719123 | Unassigned | Unassigned | Unassigned | 17_0    | Clustered           | 9 VC_17_0    | 9   | 0.6969 | 1          | 0.6969 | 0 | 0 | 0 | 1 Ref      |
| MN722429 | Unassigned | Unassigned | Unassigned | 637_0   | Clustered           | 115 VC_637_0 | 115 | 0.731  | 1          | 0.731  | 0 | 0 | 0 | 0.8764 Ref |
| MN723850 | Unassigned | Unassigned | Unassigned | 492_1   | Clustered           | 20 VC_492_1  | 20  | 0.4176 | 1          | 0.4176 | 0 | 0 | 0 | 1 Ref      |
| MN727882 | Unassigned | Unassigned | Unassigned | 100_0   | Clustered           | 15 VC_100_0  | 15  | 0.6536 | 1          | 0.6536 | 0 | 0 | 0 | 1 Ref      |
| MN728683 | Unassigned | Unassigned | Unassigned | 223_0   | Clustered           | 38 VC_223_0  | 38  | 0.9095 | 1          | 0.9095 | 0 | 0 | 0 | 1 Ref      |
| MN728684 | Unassigned | Unassigned | Unassigned | 517_1   | Clustered           | 108 VC_517_1 | 108 | 0.8483 | 1          | 0.8483 | 0 | 0 | 0 | 0.9955 Ref |
| MN729595 | Unassigned | Unassigned | Unassigned | 129_0   | Clustered           | 43 VC_129_0  | 43  | 0.886  | 1          | 0.886  | 0 | 0 | 0 | 1 Ref      |
| MN729596 | Unassigned | Unassigned | Unassigned | 129_0   | Clustered           | 43 VC_129_0  | 43  | 0.886  | 1          | 0.886  | 0 | 0 | 0 | 1 Ref      |
| MN729597 | Unassigned | Unassigned | Unassigned | 129_0   | Clustered           | 43 VC_129_0  | 43  | 0.886  | 1          | 0.886  | 0 | 0 | 0 | 1 Ref      |
| MN729598 | Unassigned | Unassigned | Unassigned | 129_0   | Clustered           | 43 VC_129_0  | 43  | 0.886  | 1          | 0.886  | 0 | 0 | 0 | 1 Ref      |
| MN729599 | Unassigned | Unassigned | Unassigned | 129_0   | Clustered           | 43 VC_129_0  | 43  | 0.886  | 1          | 0.886  | 0 | 0 | 0 | 1 Ref      |
| MN729600 | Unassigned | Unassigned | Unassigned | 129_0   | Clustered           | 43 VC_129_0  | 43  | 0.886  | 1          | 0.886  | 0 | 0 | 0 | 1 Ref      |
| MN732867 | Unassigned | Unassigned | Unassigned | 582_0   | Clustered           | 4 VC_582_0   | 4   | 0.0589 | 0.99996986 | 0.0589 | 0 | 0 | 0 | 1 Ref      |
| MN732883 | Unassigned | Unassigned | Unassigned | 492_1   | Clustered           | 20 VC_492_1  | 20  | 0.4176 | 1          | 0.4176 | 0 | 0 | 0 | 1 Ref      |
| MN732896 | Unassigned | Unassigned | Unassigned | 1010_0  | Clustered           | 2 VC_1010_0  | 2   | 0.2036 | 0.77337265 | 0.1574 | 0 | 0 | 0 | 1 Ref      |
| MN734437 | Unassigned | Unassigned | Unassigned | 752_0   | Clustered           | 3 VC_752_0   | 3   | 0.0788 | 0.9984602  | 0.0787 | 0 | 0 | 0 | 1 Ref      |
| MN734438 | Unassigned | Unassigned | Unassigned | 752_0   | Clustered           | 3 VC_752_0   | 3   | 0.0788 | 0.9984602  | 0.0787 | 0 | 0 | 0 | 1 Ref      |
| MN734439 | Unassigned | Unassigned | Unassigned | 752_0   | Clustered           | 3 VC_752_0   | 3   | 0.0788 | 0.9984602  | 0.0787 | 0 | 0 | 0 | 1 Ref      |
| MN735429 | Unassigned | Unassigned | Unassigned | 1160_0  | Clustered           | 73 VC_1160_0 | 73  | 0.9835 | 1          | 0.9835 | 0 | 0 | 0 | 1 Ref      |
| MN735430 | Unassigned | Unassigned | Unassigned | 1240_0  | Clustered           | 82 VC_1240_0 | 82  | 0.7945 | 1          | 0.7945 | 0 | 0 | 0 | 1 Ref      |
| MN735431 | Unassigned | Unassigned | Unassigned | 520_12  | Clustered/Singleton | 1 VC_520_12  | 1   | 0      | 1          | 0      | 0 | 0 | 0 | 1 Ref      |
| MN735432 | Unassigned | Unassigned | Unassigned | 1046_0  | Clustered           | 7 VC_1046_0  | 7   | 0.9413 | 1          | 0.9413 | 0 | 0 | 0 | 1 Ref      |
| MN735434 | Unassigned | Unassigned | Unassigned | 558_79  | Clustered/Singleton | 1 VC_558_79  | 1   | 0      | 1          | 0      | 0 | 0 | 0 | 1 Ref      |
| MN735435 | Unassigned | Unassigned | Unassigned | 1240_0  | Clustered           | 82 VC_1240_0 | 82  | 0.7945 | 1          | 0.7945 | 0 | 0 | 0 | 1 Ref      |
| MN737551 | Unassigned | Unassigned | Unassigned | 461_0   | Clustered           | 96 VC_461_0  | 96  | 0.9307 | 1          | 0.9307 | 0 | 0 | 0 | 0.9575 Ref |
| MN737622 | Unassigned | Unassigned | Unassigned | 233_0   | Clustered           | 2 VC_233_0   | 2   | 0.7179 | 0.72985431 | 0.5239 | 0 | 0 | 0 | 1 Ref      |
| MN781580 | Unassigned | Unassigned | Unassigned | 283_21  | Clustered/Singleton | 1 VC_283_21  | 1   | 0      | 1          | 0      | 0 | 0 | 0 | 1 Ref      |
| MN781674 | Unassigned | Unassigned | Unassigned | 942_0   | Clustered           | 36 VC_942_0  | 36  | 0.7848 | 1          | 0.7848 | 0 | 0 | 0 | 1 Ref      |
| MN782535 | Unassigned | Unassigned | Unassigned | 492_1   | Clustered           | 20 VC_492_1  | 20  | 0.4176 | 1          | 0.4176 | 0 | 0 | 0 | 1 Ref      |
| MN783016 | Unassigned | Unassigned | Unassigned | 938_0   | Clustered           | 99 VC_938_0  | 99  | 0.9119 | 1          | 0.9119 | 0 | 0 | 0 | 0.9928 Ref |
| MN788369 | Unassigned | Unassigned | Unassigned | 131_0   | Clustered           | 17 VC_131_0  | 17  | 0.2671 | 1          | 0.2671 | 0 | 0 | 0 | 1 Ref      |
| MN794000 | Unassigned | Unassigned | Unassigned | 111_0   | Clustered           | 91 VC_111_0  | 91  | 0.9587 | 1          | 0.9587 | 0 | 0 | 0 | 1 Ref      |
| MN794001 | Unassigned | Unassigned | Unassigned | 111_0   | Clustered           | 91 VC_111_0  | 91  | 0.9587 | 1          | 0.9587 | 0 | 0 | 0 | 1 Ref      |
| MN794002 | Unassigned | Unassigned | Unassigned | 111_0   | Clustered           | 91 VC_111_0  | 91  | 0.9587 | 1          | 0.9587 | 0 | 0 | 0 | 1 Ref      |
| MN794003 | Unassigned | Unassigned | Unassigned | 111_0   | Clustered           | 91 VC_111_0  | 91  | 0.9587 | 1          | 0.9587 | 0 | 0 | 0 | 1 Ref      |
| MN794232 | Unassigned | Unassigned | Unassigned | 531_1   | Clustered           | 6 VC_531_1   | 6   | 0.1481 | 0.99978665 | 0.148  | 0 | 0 | 0 | 1 Ref      |
| MN807240 | Unassigned | Unassigned | Unassigned | 1027_0  | Clustered           | 20 VC_1027_0 | 20  | 0.7114 | 1          | 0.7114 | 0 | 0 | 0 | 1 Ref      |
| MN807246 | Unassigned | Unassigned | Unassigned | 1240_0  | Clustered           | 82 VC_1240_0 | 82  | 0.7945 | 1          | 0.7945 | 0 | 0 | 0 | 1 Ref      |
| MN807247 | Unassigned | Unassigned | Unassigned | 515_0   | Clustered           | 16 VC_515_0  | 16  | 0.3793 | 1          | 0.3793 | 0 | 0 | 0 | 1 Ref      |
| MN807248 | Unassigned | Unassigned | Unassigned | 519_0   | Clustered           | 39 VC_519_0  | 39  | 0.8156 | 1          | 0.8156 | 0 | 0 | 0 | 1 Ref      |
| MN807249 | Unassigned | Unassigned | Unassigned | 519_0   | Clustered           | 39 VC_519_0  | 39  | 0.8156 | 1          | 0.8156 | 0 | 0 | 0 | 1 Ref      |
| MN807250 | Unassigned | Unassigned | Unassigned | 519_0   | Clustered           | 39 VC_519_0  | 39  | 0.8156 | 1          | 0.8156 | 0 | 0 | 0 | 1 Ref      |
| MN807295 | Unassigned | Unassigned | Unassigned | 699_0   | Clustered           | 71 VC_699_0  | 71  | 0.9352 | 1          | 0.9352 | 0 | 0 | 0 | 1 Ref      |
| MN812203 | Unassigned | Unassigned | Unassigned | 1021_0  | Clustered           | 10 VC_1021_0 | 10  | 0.8876 | 1          | 0.8876 | 0 | 0 | 0 | 1 Ref      |
| MN812204 | Unassigned | Unassigned | Unassigned | 1021_0  | Clustered           | 10 VC_1021_0 | 10  | 0.8876 | 1          | 0.8876 | 0 | 0 | 0 | 1 Ref      |
| MN812205 | Unassigned | Unassigned | Unassigned | 1021_0  | Clustered           | 10 VC_1021_0 | 10  | 0.8876 | 1          | 0.8876 | 0 | 0 | 0 | 1 Ref      |
| MN812206 | Unassigned | Unassigned | Unassigned | 1013_0  | Clustered           | 34 VC_1013_0 | 34  | 0.9939 | 1          | 0.9939 | 0 | 0 | 0 | 1 Ref      |
| MN812207 | Unassigned | Unassigned | Unassigned | 1013_0  | Clustered           | 34 VC_1013_0 | 34  | 0.9939 | 1          | 0.9939 | 0 | 0 | 0 | 1 Ref      |
| MN812208 | Unassigned | Unassigned | Unassigned | 1013_0  | Clustered           | 34 VC_1013_0 | 34  | 0.9939 | 1          | 0.9939 | 0 | 0 | 0 | 1 Ref      |



|          |            |            |            |        |                     |              |     |        |            |        |   |   |   |            |
|----------|------------|------------|------------|--------|---------------------|--------------|-----|--------|------------|--------|---|---|---|------------|
| MN812209 | Unassigned | Unassigned | Unassigned | 1013_0 | Clustered           | 34 VC_1013_0 | 34  | 0.9939 | 1          | 0.9939 | 0 | 0 | 0 | 1 Ref      |
| MN812210 | Unassigned | Unassigned | Unassigned | 1013_0 | Clustered           | 34 VC_1013_0 | 34  | 0.9939 | 1          | 0.9939 | 0 | 0 | 0 | 1 Ref      |
| MN812212 | Unassigned | Unassigned | Unassigned | 1013_0 | Clustered           | 34 VC_1013_0 | 34  | 0.9939 | 1          | 0.9939 | 0 | 0 | 0 | 1 Ref      |
| MN812213 | Unassigned | Unassigned | Unassigned | 1013_0 | Clustered           | 34 VC_1013_0 | 34  | 0.9939 | 1          | 0.9939 | 0 | 0 | 0 | 1 Ref      |
| MN812214 | Unassigned | Unassigned | Unassigned | 1013_0 | Clustered           | 34 VC_1013_0 | 34  | 0.9939 | 1          | 0.9939 | 0 | 0 | 0 | 1 Ref      |
| MN812215 | Unassigned | Unassigned | Unassigned | 1013_0 | Clustered           | 34 VC_1013_0 | 34  | 0.9939 | 1          | 0.9939 | 0 | 0 | 0 | 1 Ref      |
| MN812216 | Unassigned | Unassigned | Unassigned | 1013_0 | Clustered           | 34 VC_1013_0 | 34  | 0.9939 | 1          | 0.9939 | 0 | 0 | 0 | 1 Ref      |
| MN812217 | Unassigned | Unassigned | Unassigned | 1013_0 | Clustered           | 34 VC_1013_0 | 34  | 0.9939 | 1          | 0.9939 | 0 | 0 | 0 | 1 Ref      |
| MN812218 | Unassigned | Unassigned | Unassigned | 1013_0 | Clustered           | 34 VC_1013_0 | 34  | 0.9939 | 1          | 0.9939 | 0 | 0 | 0 | 1 Ref      |
| MN812219 | Unassigned | Unassigned | Unassigned | 1013_0 | Clustered           | 34 VC_1013_0 | 34  | 0.9939 | 1          | 0.9939 | 0 | 0 | 0 | 1 Ref      |
| MN812220 | Unassigned | Unassigned | Unassigned | 1013_0 | Clustered           | 34 VC_1013_0 | 34  | 0.9939 | 1          | 0.9939 | 0 | 0 | 0 | 1 Ref      |
| MN812221 | Unassigned | Unassigned | Unassigned | 1013_0 | Clustered           | 34 VC_1013_0 | 34  | 0.9939 | 1          | 0.9939 | 0 | 0 | 0 | 1 Ref      |
| MN812222 | Unassigned | Unassigned | Unassigned | 1013_0 | Clustered           | 34 VC_1013_0 | 34  | 0.9939 | 1          | 0.9939 | 0 | 0 | 0 | 1 Ref      |
| MN812223 | Unassigned | Unassigned | Unassigned | 1013_0 | Clustered           | 34 VC_1013_0 | 34  | 0.9939 | 1          | 0.9939 | 0 | 0 | 0 | 1 Ref      |
| MN812224 | Unassigned | Unassigned | Unassigned | 1013_0 | Clustered           | 34 VC_1013_0 | 34  | 0.9939 | 1          | 0.9939 | 0 | 0 | 0 | 1 Ref      |
| MN812225 | Unassigned | Unassigned | Unassigned | 1013_0 | Clustered           | 34 VC_1013_0 | 34  | 0.9939 | 1          | 0.9939 | 0 | 0 | 0 | 1 Ref      |
| MN812226 | Unassigned | Unassigned | Unassigned | 1013_0 | Clustered           | 34 VC_1013_0 | 34  | 0.9939 | 1          | 0.9939 | 0 | 0 | 0 | 1 Ref      |
| MN812227 | Unassigned | Unassigned | Unassigned | 1013_0 | Clustered           | 34 VC_1013_0 | 34  | 0.9939 | 1          | 0.9939 | 0 | 0 | 0 | 1 Ref      |
| MN812228 | Unassigned | Unassigned | Unassigned | 1013_0 | Clustered           | 34 VC_1013_0 | 34  | 0.9939 | 1          | 0.9939 | 0 | 0 | 0 | 1 Ref      |
| MN812229 | Unassigned | Unassigned | Unassigned | 1013_0 | Clustered           | 34 VC_1013_0 | 34  | 0.9939 | 1          | 0.9939 | 0 | 0 | 0 | 1 Ref      |
| MN812230 | Unassigned | Unassigned | Unassigned | 1013_0 | Clustered           | 34 VC_1013_0 | 34  | 0.9939 | 1          | 0.9939 | 0 | 0 | 0 | 1 Ref      |
| MN812231 | Unassigned | Unassigned | Unassigned | 1013_0 | Clustered           | 34 VC_1013_0 | 34  | 0.9939 | 1          | 0.9939 | 0 | 0 | 0 | 1 Ref      |
| MN812232 | Unassigned | Unassigned | Unassigned | 1013_0 | Clustered           | 34 VC_1013_0 | 34  | 0.9939 | 1          | 0.9939 | 0 | 0 | 0 | 1 Ref      |
| MN812233 | Unassigned | Unassigned | Unassigned | 1013_0 | Clustered           | 34 VC_1013_0 | 34  | 0.9939 | 1          | 0.9939 | 0 | 0 | 0 | 1 Ref      |
| MN812234 | Unassigned | Unassigned | Unassigned | 1013_0 | Clustered           | 34 VC_1013_0 | 34  | 0.9939 | 1          | 0.9939 | 0 | 0 | 0 | 1 Ref      |
| MN812235 | Unassigned | Unassigned | Unassigned | 1013_0 | Clustered           | 34 VC_1013_0 | 34  | 0.9939 | 1          | 0.9939 | 0 | 0 | 0 | 1 Ref      |
| MN812236 | Unassigned | Unassigned | Unassigned | 1013_0 | Clustered           | 34 VC_1013_0 | 34  | 0.9939 | 1          | 0.9939 | 0 | 0 | 0 | 1 Ref      |
| MN812237 | Unassigned | Unassigned | Unassigned | 1013_0 | Clustered           | 34 VC_1013_0 | 34  | 0.9939 | 1          | 0.9939 | 0 | 0 | 0 | 1 Ref      |
| MN812238 | Unassigned | Unassigned | Unassigned | 1013_0 | Clustered           | 34 VC_1013_0 | 34  | 0.9939 | 1          | 0.9939 | 0 | 0 | 0 | 1 Ref      |
| MN812240 | Unassigned | Unassigned | Unassigned | 1013_0 | Clustered           | 34 VC_1013_0 | 34  | 0.9939 | 1          | 0.9939 | 0 | 0 | 0 | 1 Ref      |
| MN812241 | Unassigned | Unassigned | Unassigned | 1013_0 | Clustered           | 34 VC_1013_0 | 34  | 0.9939 | 1          | 0.9939 | 0 | 0 | 0 | 1 Ref      |
| MN812685 | Unassigned | Unassigned | Unassigned | 841_0  | Clustered           | 10 VC_841_0  | 10  | 0.5997 | 1          | 0.5997 | 0 | 0 | 0 | 1 Ref      |
| MN812686 | Unassigned | Unassigned | Unassigned | 451_0  | Clustered           | 80 VC_451_0  | 80  | 0.9991 | 1          | 0.9991 | 0 | 0 | 0 | 1 Ref      |
| MN812687 | Unassigned | Unassigned | Unassigned | 841_0  | Clustered           | 10 VC_841_0  | 10  | 0.5997 | 1          | 0.5997 | 0 | 0 | 0 | 1 Ref      |
| MN812688 | Unassigned | Unassigned | Unassigned | 792_0  | Clustered           | 35 VC_792_0  | 35  | 0.9828 | 1          | 0.9828 | 0 | 0 | 0 | 1 Ref      |
| MN812690 | Unassigned | Unassigned | Unassigned | 984_0  | Clustered           | 38 VC_984_0  | 38  | 0.9758 | 1          | 0.9758 | 0 | 0 | 0 | 1 Ref      |
| MN812691 | Unassigned | Unassigned | Unassigned | 841_0  | Clustered           | 10 VC_841_0  | 10  | 0.5997 | 1          | 0.5997 | 0 | 0 | 0 | 1 Ref      |
| MN812692 | Unassigned | Unassigned | Unassigned | 984_0  | Clustered           | 38 VC_984_0  | 38  | 0.9758 | 1          | 0.9758 | 0 | 0 | 0 | 1 Ref      |
| MN812693 | Unassigned | Unassigned | Unassigned | 393_0  | Clustered           | 7 VC_393_0   | 7   | 0.1775 | 1          | 0.1775 | 0 | 0 | 0 | 1 Ref      |
| MN812694 | Unassigned | Unassigned | Unassigned | 78_4   | Clustered           | 1 VC_78_4    | 1   | 0      | 0          | 0      | 0 | 0 | 0 | 1 Ref      |
| MN812722 | Unassigned | Unassigned | Unassigned | 354_0  | Clustered           | 4 VC_354_0   | 4   | 0.1749 | 0.99998684 | 0.1749 | 0 | 0 | 0 | 0.8333 Ref |
| MN813048 | Unassigned | Unassigned | Unassigned | 131_0  | Clustered           | 17 VC_131_0  | 17  | 0.2671 | 1          | 0.2671 | 0 | 0 | 0 | 1 Ref      |
| MN813049 | Unassigned | Unassigned | Unassigned | 131_0  | Clustered           | 17 VC_131_0  | 17  | 0.2671 | 1          | 0.2671 | 0 | 0 | 0 | 1 Ref      |
| MN813050 | Unassigned | Unassigned | Unassigned | 131_0  | Clustered           | 17 VC_131_0  | 17  | 0.2671 | 1          | 0.2671 | 0 | 0 | 0 | 1 Ref      |
| MN813051 | Unassigned | Unassigned | Unassigned | 131_0  | Clustered           | 17 VC_131_0  | 17  | 0.2671 | 1          | 0.2671 | 0 | 0 | 0 | 1 Ref      |
| MN813052 | Unassigned | Unassigned | Unassigned | 131_0  | Clustered           | 17 VC_131_0  | 17  | 0.2671 | 1          | 0.2671 | 0 | 0 | 0 | 1 Ref      |
| MN813053 | Unassigned | Unassigned | Unassigned | 131_0  | Clustered           | 17 VC_131_0  | 17  | 0.2671 | 1          | 0.2671 | 0 | 0 | 0 | 1 Ref      |
| MN813675 | Unassigned | Unassigned | Unassigned | 765_0  | Clustered           | 132 VC_765_0 | 132 | 1      | 1          | 1      | 0 | 0 | 0 | 1 Ref      |
| MN813676 | Unassigned | Unassigned | Unassigned | 1207_0 | Clustered           | 29 VC_1207_0 | 29  | 0.8225 | 1          | 0.8225 | 0 | 0 | 0 | 1 Ref      |
| MN813677 | Unassigned | Unassigned | Unassigned | 765_0  | Clustered           | 132 VC_765_0 | 132 | 1      | 1          | 1      | 0 | 0 | 0 | 1 Ref      |
| MN813678 | Unassigned | Unassigned | Unassigned | 508_0  | Clustered           | 32 VC_508_0  | 32  | 0.906  | 1          | 0.906  | 0 | 0 | 0 | 1 Ref      |
| MN813679 | Unassigned | Unassigned | Unassigned | 765_0  | Clustered           | 132 VC_765_0 | 132 | 1      | 1          | 1      | 0 | 0 | 0 | 1 Ref      |
| MN813680 | Unassigned | Unassigned | Unassigned | 1160_0 | Clustered           | 73 VC_1160_0 | 73  | 0.9835 | 1          | 0.9835 | 0 | 0 | 0 | 1 Ref      |
| MN813682 | Unassigned | Unassigned | Unassigned | 1349_0 | Clustered           | 7 VC_1349_0  | 7   | 0.2495 | 1          | 0.2495 | 0 | 0 | 0 | 1 Ref      |
| MN813683 | Unassigned | Unassigned | Unassigned | 765_0  | Clustered           | 132 VC_765_0 | 132 | 1      | 1          | 1      | 0 | 0 | 0 | 1 Ref      |
| MN813684 | Unassigned | Unassigned | Unassigned | 1349_0 | Clustered           | 7 VC_1349_0  | 7   | 0.2495 | 1          | 0.2495 | 0 | 0 | 0 | 1 Ref      |
| MN813687 | Unassigned | Unassigned | Unassigned | 573_0  | Clustered           | 2 VC_573_0   | 2   | 0.11   | 0.95639318 | 0.1052 | 0 | 0 | 0 | 1 Ref      |
| MN813688 | Unassigned | Unassigned | Unassigned | 765_0  | Clustered           | 132 VC_765_0 | 132 | 1      | 1          | 1      | 0 | 0 | 0 | 1 Ref      |
| MN813689 | Unassigned | Unassigned | Unassigned | 765_0  | Clustered           | 132 VC_765_0 | 132 | 1      | 1          | 1      | 0 | 0 | 0 | 1 Ref      |
| MN813690 | Unassigned | Unassigned | Unassigned | 765_0  | Clustered           | 132 VC_765_0 | 132 | 1      | 1          | 1      | 0 | 0 | 0 | 1 Ref      |
| MN813691 | Unassigned | Unassigned | Unassigned | 765_0  | Clustered           | 132 VC_765_0 | 132 | 1      | 1          | 1      | 0 | 0 | 0 | 1 Ref      |
| MN813692 | Unassigned | Unassigned | Unassigned | 765_0  | Clustered           | 132 VC_765_0 | 132 | 1      | 1          | 1      | 0 | 0 | 0 | 1 Ref      |
| MN813693 | Unassigned | Unassigned | Unassigned | 372_4  | Clustered           | 3 VC_372_4   | 3   | 0.033  | 0.99853257 | 0.0329 | 0 | 0 | 0 | 1 Ref      |
| MN813694 | Unassigned | Unassigned | Unassigned | 1177_0 | Clustered           | 14 VC_1177_0 | 14  | 0.7847 | 1          | 0.7847 | 0 | 0 | 0 | 0.989 Ref  |
| MN813695 | Unassigned | Unassigned | Unassigned | 950_0  | Clustered           | 38 VC_950_0  | 38  | 0.9443 | 1          | 0.9443 | 0 | 0 | 0 | 1 Ref      |
| MN813696 | Unassigned | Unassigned | Unassigned | 517_1  | Clustered           | 108 VC_517_1 | 108 | 0.8483 | 1          | 0.8483 | 0 | 0 | 0 | 0.9955 Ref |
| MN813697 | Unassigned | Unassigned | Unassigned | 517_0  | Clustered           | 18 VC_517_0  | 18  | 0.1599 | 1          | 0.1599 | 0 | 0 | 0 | 1 Ref      |
| MN813698 | Unassigned | Unassigned | Unassigned | 1183_0 | Clustered           | 6 VC_1183_0  | 6   | 0.995  | 0.99996974 | 0.995  | 0 | 0 | 0 | 1 Ref      |
| MN813699 | Unassigned | Unassigned | Unassigned | 514_0  | Clustered           | 75 VC_514_0  | 75  | 0.9402 | 1          | 0.9402 | 0 | 0 | 0 | 1 Ref      |
| MN813700 | Unassigned | Unassigned | Unassigned | 325_12 | Clustered/Singleton | 1 VC_325_12  | 1   | 0      | 1          | 0      | 0 | 0 | 0 | 1 Ref      |
| MN830254 | Unassigned | Unassigned | Unassigned | 877_0  | Clustered           | 2 VC_877_0   | 2   | 0.7762 | 0.86822376 | 0.6739 | 0 | 0 | 0 | 1 Ref      |
| MN830255 | Unassigned | Unassigned | Unassigned | 877_0  | Clustered           | 2 VC_877_0   | 2   | 0.7762 | 0.86822376 | 0.6739 | 0 | 0 | 0 | 1 Ref      |
| MN830256 | Unassigned | Unassigned | Unassigned | 309_0  | Clustered           | 3 VC_309_0   | 3   | 0.1265 | 0.99498896 | 0.1258 | 0 | 0 | 0 | 1 Ref      |
| MN830258 | Unassigned | Unassigned | Unassigned | 272_0  | Clustered           | 11 VC_272_0  | 11  | 0.4915 | 1          | 0.4915 | 0 | 0 | 0 | 0.8727 Ref |
| MN840485 | Unassigned | Unassigned | Unassigned | 456_0  | Clustered           | 62 VC_456_0  | 62  | 0.9026 | 1          | 0.9026 | 0 | 0 | 0 | 1 Ref      |
| MN840486 | Unassigned | Unassigned | Unassigned | 591_0  | Clustered           | 14 VC_591_0  | 14  | 0.5184 | 1          | 0.5184 | 0 | 0 | 0 | 1 Ref      |
| MN844877 | Unassigned | Unassigned | Unassigned | 154_0  | Clustered           | 4 VC_154_0   | 4   | 0.1766 | 0.99995106 | 0.1766 | 0 | 0 | 0 | 1 Ref      |
| MN850564 | Unassigned | Unassigned | Unassigned | 329_3  | Clustered           | 24 VC_329_3  | 24  | 0.1206 | 1          | 0.1206 | 0 | 0 | 0 | 0.7283 Ref |
| MN850565 | Unassigned | Unassigned | Unassigned | 847_1  | Clustered           | 26 VC_847_1  | 26  | 0.6323 | 1          | 0.6323 | 0 | 0 | 0 | 0.9815 Ref |
| MN850566 | Unassigned | Unassigned | Unassigned | 329_3  | Clustered           | 24 VC_329_3  | 24  | 0.1206 | 1          | 0.1206 | 0 | 0 | 0 | 0.7283 Ref |
| MN850567 | Unassigned | Unassigned | Unassigned | 941_0  | Clustered           | 40 VC_941_0  | 40  | 0.6903 | 1          | 0.6903 | 0 | 0 | 0 | 1 Ref      |



|          |            |            |            |        |           |              |     |        |            |        |   |   |   |   |            |
|----------|------------|------------|------------|--------|-----------|--------------|-----|--------|------------|--------|---|---|---|---|------------|
| MN850568 | Unassigned | Unassigned | Unassigned | 156_0  | Clustered | 12 VC_156_0  | 12  | 0.9062 | 1          | 0.9062 | 0 | 0 | 0 | 0 | 1 Ref      |
| MN850569 | Unassigned | Unassigned | Unassigned | 941_0  | Clustered | 40 VC_941_0  | 40  | 0.6903 | 1          | 0.6903 | 0 | 0 | 0 | 0 | 1 Ref      |
| MN850570 | Unassigned | Unassigned | Unassigned | 156_0  | Clustered | 12 VC_156_0  | 12  | 0.9062 | 1          | 0.9062 | 0 | 0 | 0 | 0 | 1 Ref      |
| MN850571 | Unassigned | Unassigned | Unassigned | 847_1  | Clustered | 26 VC_847_1  | 26  | 0.6323 | 1          | 0.6323 | 0 | 0 | 0 | 0 | 0.9815 Ref |
| MN850572 | Unassigned | Unassigned | Unassigned | 941_0  | Clustered | 40 VC_941_0  | 40  | 0.6903 | 1          | 0.6903 | 0 | 0 | 0 | 0 | 1 Ref      |
| MN850573 | Unassigned | Unassigned | Unassigned | 848_0  | Clustered | 28 VC_848_0  | 28  | 0.7927 | 1          | 0.7927 | 0 | 0 | 0 | 0 | 1 Ref      |
| MN850574 | Unassigned | Unassigned | Unassigned | 590_0  | Clustered | 27 VC_590_0  | 27  | 0.9947 | 1          | 0.9947 | 0 | 0 | 0 | 0 | 1 Ref      |
| MN850575 | Unassigned | Unassigned | Unassigned | 835_0  | Clustered | 67 VC_835_0  | 67  | 0.9624 | 1          | 0.9624 | 0 | 0 | 0 | 0 | 1 Ref      |
| MN850576 | Unassigned | Unassigned | Unassigned | 772_19 | Clustered | 16 VC_772_19 | 16  | 0.0975 | 0.9970466  | 0.0972 | 0 | 0 | 0 | 0 | 0.8083 Ref |
| MN850577 | Unassigned | Unassigned | Unassigned | 329_3  | Clustered | 24 VC_329_3  | 24  | 0.1206 | 1          | 0.1206 | 0 | 0 | 0 | 0 | 0.7283 Ref |
| MN850578 | Unassigned | Unassigned | Unassigned | 772_19 | Clustered | 16 VC_772_19 | 16  | 0.0975 | 0.9970466  | 0.0972 | 0 | 0 | 0 | 0 | 0.8083 Ref |
| MN850579 | Unassigned | Unassigned | Unassigned | 286_1  | Clustered | 21 VC_286_1  | 21  | 0.1696 | 1          | 0.1696 | 0 | 0 | 0 | 0 | 0.9048 Ref |
| MN850580 | Unassigned | Unassigned | Unassigned | 329_3  | Clustered | 24 VC_329_3  | 24  | 0.1206 | 1          | 0.1206 | 0 | 0 | 0 | 0 | 0.7283 Ref |
| MN850581 | Unassigned | Unassigned | Unassigned | 705_0  | Clustered | 11 VC_705_0  | 11  | 0.8861 | 1          | 0.8861 | 0 | 0 | 0 | 0 | 1 Ref      |
| MN850582 | Unassigned | Unassigned | Unassigned | 942_0  | Clustered | 36 VC_942_0  | 36  | 0.7848 | 1          | 0.7848 | 0 | 0 | 0 | 0 | 1 Ref      |
| MN850583 | Unassigned | Unassigned | Unassigned | 156_0  | Clustered | 12 VC_156_0  | 12  | 0.9062 | 1          | 0.9062 | 0 | 0 | 0 | 0 | 1 Ref      |
| MN850584 | Unassigned | Unassigned | Unassigned | 848_0  | Clustered | 28 VC_848_0  | 28  | 0.7927 | 1          | 0.7927 | 0 | 0 | 0 | 0 | 1 Ref      |
| MN850585 | Unassigned | Unassigned | Unassigned | 329_3  | Clustered | 24 VC_329_3  | 24  | 0.1206 | 1          | 0.1206 | 0 | 0 | 0 | 0 | 0.7283 Ref |
| MN850586 | Unassigned | Unassigned | Unassigned | 942_0  | Clustered | 36 VC_942_0  | 36  | 0.7848 | 1          | 0.7848 | 0 | 0 | 0 | 0 | 1 Ref      |
| MN850587 | Unassigned | Unassigned | Unassigned | 330_0  | Clustered | 27 VC_330_0  | 27  | 0.5088 | 1          | 0.5088 | 0 | 0 | 0 | 0 | 0.8661 Ref |
| MN850588 | Unassigned | Unassigned | Unassigned | 705_0  | Clustered | 11 VC_705_0  | 11  | 0.8861 | 1          | 0.8861 | 0 | 0 | 0 | 0 | 1 Ref      |
| MN850589 | Unassigned | Unassigned | Unassigned | 835_0  | Clustered | 67 VC_835_0  | 67  | 0.9624 | 1          | 0.9624 | 0 | 0 | 0 | 0 | 1 Ref      |
| MN850590 | Unassigned | Unassigned | Unassigned | 286_1  | Clustered | 21 VC_286_1  | 21  | 0.1696 | 1          | 0.1696 | 0 | 0 | 0 | 0 | 0.9048 Ref |
| MN850591 | Unassigned | Unassigned | Unassigned | 941_0  | Clustered | 40 VC_941_0  | 40  | 0.6903 | 1          | 0.6903 | 0 | 0 | 0 | 0 | 1 Ref      |
| MN850592 | Unassigned | Unassigned | Unassigned | 156_0  | Clustered | 12 VC_156_0  | 12  | 0.9062 | 1          | 0.9062 | 0 | 0 | 0 | 0 | 1 Ref      |
| MN850593 | Unassigned | Unassigned | Unassigned | 772_20 | Clustered | 2 VC_772_20  | 2   | 0.006  | 0.58868587 | 0.0035 | 0 | 0 | 0 | 0 | 1 Ref      |
| MN850594 | Unassigned | Unassigned | Unassigned | 792_0  | Clustered | 35 VC_792_0  | 35  | 0.9828 | 1          | 0.9828 | 0 | 0 | 0 | 0 | 1 Ref      |
| MN850595 | Unassigned | Unassigned | Unassigned | 772_19 | Clustered | 16 VC_772_19 | 16  | 0.0975 | 0.9970466  | 0.0972 | 0 | 0 | 0 | 0 | 0.8083 Ref |
| MN850596 | Unassigned | Unassigned | Unassigned | 942_0  | Clustered | 36 VC_942_0  | 36  | 0.7848 | 1          | 0.7848 | 0 | 0 | 0 | 0 | 1 Ref      |
| MN850597 | Unassigned | Unassigned | Unassigned | 772_19 | Clustered | 16 VC_772_19 | 16  | 0.0975 | 0.9970466  | 0.0972 | 0 | 0 | 0 | 0 | 0.8083 Ref |
| MN850598 | Unassigned | Unassigned | Unassigned | 847_1  | Clustered | 26 VC_847_1  | 26  | 0.6323 | 1          | 0.6323 | 0 | 0 | 0 | 0 | 0.9815 Ref |
| MN850600 | Unassigned | Unassigned | Unassigned | 941_0  | Clustered | 40 VC_941_0  | 40  | 0.6903 | 1          | 0.6903 | 0 | 0 | 0 | 0 | 1 Ref      |
| MN850601 | Unassigned | Unassigned | Unassigned | 848_0  | Clustered | 28 VC_848_0  | 28  | 0.7927 | 1          | 0.7927 | 0 | 0 | 0 | 0 | 1 Ref      |
| MN850602 | Unassigned | Unassigned | Unassigned | 941_0  | Clustered | 40 VC_941_0  | 40  | 0.6903 | 1          | 0.6903 | 0 | 0 | 0 | 0 | 1 Ref      |
| MN850603 | Unassigned | Unassigned | Unassigned | 329_3  | Clustered | 24 VC_329_3  | 24  | 0.1206 | 1          | 0.1206 | 0 | 0 | 0 | 0 | 0.7283 Ref |
| MN850604 | Unassigned | Unassigned | Unassigned | 942_0  | Clustered | 36 VC_942_0  | 36  | 0.7848 | 1          | 0.7848 | 0 | 0 | 0 | 0 | 1 Ref      |
| MN850605 | Unassigned | Unassigned | Unassigned | 329_3  | Clustered | 24 VC_329_3  | 24  | 0.1206 | 1          | 0.1206 | 0 | 0 | 0 | 0 | 0.7283 Ref |
| MN850606 | Unassigned | Unassigned | Unassigned | 942_0  | Clustered | 36 VC_942_0  | 36  | 0.7848 | 1          | 0.7848 | 0 | 0 | 0 | 0 | 1 Ref      |
| MN850607 | Unassigned | Unassigned | Unassigned | 941_0  | Clustered | 40 VC_941_0  | 40  | 0.6903 | 1          | 0.6903 | 0 | 0 | 0 | 0 | 1 Ref      |
| MN850608 | Unassigned | Unassigned | Unassigned | 156_0  | Clustered | 12 VC_156_0  | 12  | 0.9062 | 1          | 0.9062 | 0 | 0 | 0 | 0 | 1 Ref      |
| MN850609 | Unassigned | Unassigned | Unassigned | 290_6  | Clustered | 12 VC_290_6  | 12  | 0.1149 | 1          | 0.1149 | 0 | 0 | 0 | 0 | 0.8182 Ref |
| MN850610 | Unassigned | Unassigned | Unassigned | 329_3  | Clustered | 24 VC_329_3  | 24  | 0.1206 | 1          | 0.1206 | 0 | 0 | 0 | 0 | 0.7283 Ref |
| MN850611 | Unassigned | Unassigned | Unassigned | 329_3  | Clustered | 24 VC_329_3  | 24  | 0.1206 | 1          | 0.1206 | 0 | 0 | 0 | 0 | 0.7283 Ref |
| MN850612 | Unassigned | Unassigned | Unassigned | 772_19 | Clustered | 16 VC_772_19 | 16  | 0.0975 | 0.9970466  | 0.0972 | 0 | 0 | 0 | 0 | 0.8083 Ref |
| MN850613 | Unassigned | Unassigned | Unassigned | 942_0  | Clustered | 36 VC_942_0  | 36  | 0.7848 | 1          | 0.7848 | 0 | 0 | 0 | 0 | 1 Ref      |
| MN850614 | Unassigned | Unassigned | Unassigned | 329_3  | Clustered | 24 VC_329_3  | 24  | 0.1206 | 1          | 0.1206 | 0 | 0 | 0 | 0 | 0.7283 Ref |
| MN850615 | Unassigned | Unassigned | Unassigned | 590_0  | Clustered | 27 VC_590_0  | 27  | 0.9947 | 1          | 0.9947 | 0 | 0 | 0 | 0 | 1 Ref      |
| MN850616 | Unassigned | Unassigned | Unassigned | 637_0  | Clustered | 115 VC_637_0 | 115 | 0.731  | 1          | 0.731  | 0 | 0 | 0 | 0 | 0.8764 Ref |
| MN850617 | Unassigned | Unassigned | Unassigned | 156_0  | Clustered | 12 VC_156_0  | 12  | 0.9062 | 1          | 0.9062 | 0 | 0 | 0 | 0 | 1 Ref      |
| MN850618 | Unassigned | Unassigned | Unassigned | 847_1  | Clustered | 26 VC_847_1  | 26  | 0.6323 | 1          | 0.6323 | 0 | 0 | 0 | 0 | 0.9815 Ref |
| MN850619 | Unassigned | Unassigned | Unassigned | 329_3  | Clustered | 24 VC_329_3  | 24  | 0.1206 | 1          | 0.1206 | 0 | 0 | 0 | 0 | 0.7283 Ref |
| MN850620 | Unassigned | Unassigned | Unassigned | 942_0  | Clustered | 36 VC_942_0  | 36  | 0.7848 | 1          | 0.7848 | 0 | 0 | 0 | 0 | 1 Ref      |
| MN850621 | Unassigned | Unassigned | Unassigned | 290_6  | Clustered | 12 VC_290_6  | 12  | 0.1149 | 1          | 0.1149 | 0 | 0 | 0 | 0 | 0.8182 Ref |
| MN850622 | Unassigned | Unassigned | Unassigned | 286_17 | Clustered | 8 VC_286_17  | 8   | 0.0535 | 0.99997829 | 0.0535 | 0 | 0 | 0 | 0 | 0.6071 Ref |
| MN850623 | Unassigned | Unassigned | Unassigned | 705_0  | Clustered | 11 VC_705_0  | 11  | 0.8861 | 1          | 0.8861 | 0 | 0 | 0 | 0 | 1 Ref      |
| MN850624 | Unassigned | Unassigned | Unassigned | 156_0  | Clustered | 12 VC_156_0  | 12  | 0.9062 | 1          | 0.9062 | 0 | 0 | 0 | 0 | 1 Ref      |
| MN850625 | Unassigned | Unassigned | Unassigned | 156_0  | Clustered | 12 VC_156_0  | 12  | 0.9062 | 1          | 0.9062 | 0 | 0 | 0 | 0 | 1 Ref      |
| MN850626 | Unassigned | Unassigned | Unassigned | 772_19 | Clustered | 16 VC_772_19 | 16  | 0.0975 | 0.9970466  | 0.0972 | 0 | 0 | 0 | 0 | 0.8083 Ref |
| MN850627 | Unassigned | Unassigned | Unassigned | 772_19 | Clustered | 16 VC_772_19 | 16  | 0.0975 | 0.9970466  | 0.0972 | 0 | 0 | 0 | 0 | 0.8083 Ref |
| MN850628 | Unassigned | Unassigned | Unassigned | 835_0  | Clustered | 67 VC_835_0  | 67  | 0.9624 | 1          | 0.9624 | 0 | 0 | 0 | 0 | 1 Ref      |
| MN850629 | Unassigned | Unassigned | Unassigned | 835_0  | Clustered | 67 VC_835_0  | 67  | 0.9624 | 1          | 0.9624 | 0 | 0 | 0 | 0 | 1 Ref      |
| MN850630 | Unassigned | Unassigned | Unassigned | 772_10 | Clustered | 8 VC_772_10  | 8   | 0.0433 | 0.9088183  | 0.0394 | 0 | 0 | 0 | 0 | 0.9286 Ref |
| MN850631 | Unassigned | Unassigned | Unassigned | 329_2  | Clustered | 2 VC_329_2   | 2   | 0.0049 | 0.95560085 | 0.0047 | 0 | 0 | 0 | 0 | 1 Ref      |
| MN850632 | Unassigned | Unassigned | Unassigned | 848_0  | Clustered | 28 VC_848_0  | 28  | 0.7927 | 1          | 0.7927 | 0 | 0 | 0 | 0 | 1 Ref      |
| MN850633 | Unassigned | Unassigned | Unassigned | 329_3  | Clustered | 24 VC_329_3  | 24  | 0.1206 | 1          | 0.1206 | 0 | 0 | 0 | 0 | 0.7283 Ref |
| MN850634 | Unassigned | Unassigned | Unassigned | 942_0  | Clustered | 36 VC_942_0  | 36  | 0.7848 | 1          | 0.7848 | 0 | 0 | 0 | 0 | 1 Ref      |
| MN850635 | Unassigned | Unassigned | Unassigned | 329_3  | Clustered | 24 VC_329_3  | 24  | 0.1206 | 1          | 0.1206 | 0 | 0 | 0 | 0 | 0.7283 Ref |
| MN850636 | Unassigned | Unassigned | Unassigned | 329_3  | Clustered | 24 VC_329_3  | 24  | 0.1206 | 1          | 0.1206 | 0 | 0 | 0 | 0 | 0.7283 Ref |
| MN850637 | Unassigned | Unassigned | Unassigned | 329_2  | Clustered | 2 VC_329_2   | 2   | 0.0049 | 0.95560085 | 0.0047 | 0 | 0 | 0 | 0 | 1 Ref      |
| MN850638 | Unassigned | Unassigned | Unassigned | 942_0  | Clustered | 36 VC_942_0  | 36  | 0.7848 | 1          | 0.7848 | 0 | 0 | 0 | 0 | 1 Ref      |
| MN850639 | Unassigned | Unassigned | Unassigned | 329_3  | Clustered | 24 VC_329_3  | 24  | 0.1206 | 1          | 0.1206 | 0 | 0 | 0 | 0 | 0.7283 Ref |
| MN850640 | Unassigned | Unassigned | Unassigned | 941_0  | Clustered | 40 VC_941_0  | 40  | 0.6903 | 1          | 0.6903 | 0 | 0 | 0 | 0 | 1 Ref      |
| MN850641 | Unassigned | Unassigned | Unassigned | 942_0  | Clustered | 36 VC_942_0  | 36  | 0.7848 | 1          | 0.7848 | 0 | 0 | 0 | 0 | 1 Ref      |
| MN850642 | Unassigned | Unassigned | Unassigned | 772_16 | Clustered | 10 VC_772_16 | 10  | 0.0563 | 0.9434928  | 0.0531 | 0 | 0 | 0 | 0 | 0.8667 Ref |
| MN850643 | Unassigned | Unassigned | Unassigned | 942_0  | Clustered | 36 VC_942_0  | 36  | 0.7848 | 1          | 0.7848 | 0 | 0 | 0 | 0 | 1 Ref      |
| MN850644 | Unassigned | Unassigned | Unassigned | 329_3  | Clustered | 24 VC_329_3  | 24  | 0.1206 | 1          | 0.1206 | 0 | 0 | 0 | 0 | 0.7283 Ref |
| MN850645 | Unassigned | Unassigned | Unassigned | 848_0  | Clustered | 28 VC_848_0  | 28  | 0.7927 | 1          | 0.7927 | 0 | 0 | 0 | 0 | 1 Ref      |
| MN850646 | Unassigned | Unassigned | Unassigned | 772_6  | Clustered | 3 VC_772_6   | 3   | 0.012  | 0.63979507 | 0.0077 | 0 | 0 | 0 | 0 | 1 Ref      |
| MN850647 | Unassigned | Unassigned | Unassigned | 329_3  | Clustered | 24 VC_329_3  | 24  | 0.1206 | 1          | 0.1206 | 0 | 0 | 0 | 0 | 0.7283 Ref |
| MN850648 | Unassigned | Unassigned | Unassigned | 847_1  | Clustered | 26 VC_847_1  | 26  | 0.6323 | 1          | 0.6323 | 0 | 0 | 0 | 0 | 0.9815 Ref |
| MN850649 | Unassigned | Unassigned | Unassigned | 772_6  | Clustered | 3 VC_772_6   | 3   | 0.012  | 0.63979507 | 0.0077 | 0 | 0 | 0 | 0 | 1 Ref      |



|          |            |            |            |        |                     |              |    |        |            |        |   |   |   |            |
|----------|------------|------------|------------|--------|---------------------|--------------|----|--------|------------|--------|---|---|---|------------|
| MN850650 | Unassigned | Unassigned | Unassigned | 835_0  | Clustered           | 67 VC_835_0  | 67 | 0.9624 | 1          | 0.9624 | 0 | 0 | 0 | 1 Ref      |
| MN850651 | Unassigned | Unassigned | Unassigned | 286_2  | Clustered/Singleton | 1 VC_286_2   | 1  | 0      | 1          | 0      | 0 | 0 | 0 | 1 Ref      |
| MN854830 | Unassigned | Unassigned | Unassigned | 91_0   | Clustered           | 22 VC_91_0   | 22 | 0.5318 | 1          | 0.5318 | 0 | 0 | 0 | 1 Ref      |
| MN862068 | Unassigned | Unassigned | Unassigned | 467_0  | Clustered           | 5 VC_467_0   | 5  | 0.6874 | 0.99999996 | 0.6874 | 0 | 0 | 0 | 1 Ref      |
| MN862333 | Unassigned | Unassigned | Unassigned | 995_0  | Clustered           | 69 VC_995_0  | 69 | 0.8547 | 1          | 0.8547 | 0 | 0 | 0 | 1 Ref      |
| MN862335 | Unassigned | Unassigned | Unassigned | 995_0  | Clustered           | 69 VC_995_0  | 69 | 0.8547 | 1          | 0.8547 | 0 | 0 | 0 | 1 Ref      |
| MN862338 | Unassigned | Unassigned | Unassigned | 1066_0 | Clustered           | 52 VC_1066_0 | 52 | 0.7682 | 1          | 0.7682 | 0 | 0 | 0 | 1 Ref      |
| MN862339 | Unassigned | Unassigned | Unassigned | 996_0  | Clustered           | 2 VC_996_0   | 2  | 0.0422 | 0.59038153 | 0.0249 | 0 | 0 | 0 | 1 Ref      |
| MN862340 | Unassigned | Unassigned | Unassigned | 996_0  | Clustered           | 2 VC_996_0   | 2  | 0.0422 | 0.59038153 | 0.0249 | 0 | 0 | 0 | 1 Ref      |
| MN862341 | Unassigned | Unassigned | Unassigned | 995_0  | Clustered           | 69 VC_995_0  | 69 | 0.8547 | 1          | 0.8547 | 0 | 0 | 0 | 1 Ref      |
| MN862343 | Unassigned | Unassigned | Unassigned | 198_0  | Clustered           | 28 VC_198_0  | 28 | 0.2429 | 0.99971175 | 0.2429 | 0 | 0 | 0 | 1 Ref      |
| MN862345 | Unassigned | Unassigned | Unassigned | 197_0  | Clustered           | 5 VC_197_0   | 5  | 0.1324 | 0.84698401 | 0.1122 | 0 | 0 | 0 | 1 Ref      |
| MN862346 | Unassigned | Unassigned | Unassigned | 1077_0 | Clustered           | 48 VC_1077_0 | 48 | 0.8525 | 1          | 0.8525 | 0 | 0 | 0 | 1 Ref      |
| MN864145 | Unassigned | Unassigned | Unassigned | 286_6  | Clustered/Singleton | 1 VC_286_6   | 1  | 0      | 1          | 0      | 0 | 0 | 0 | 1 Ref      |
| MN864865 | Unassigned | Unassigned | Unassigned | 492_2  | Clustered           | 8 VC_492_2   | 8  | 0.1221 | 0.98786574 | 0.1206 | 0 | 0 | 0 | 1 Ref      |
| MN871441 | Unassigned | Unassigned | Unassigned | 443_2  | Clustered           | 10 VC_443_2  | 10 | 0.3344 | 1          | 0.3344 | 0 | 0 | 0 | 0.9333 Ref |
| MN871442 | Unassigned | Unassigned | Unassigned | 443_2  | Clustered           | 10 VC_443_2  | 10 | 0.3344 | 1          | 0.3344 | 0 | 0 | 0 | 0.9333 Ref |
| MN871443 | Unassigned | Unassigned | Unassigned | 108_0  | Clustered           | 33 VC_108_0  | 33 | 0.949  | 1          | 0.949  | 0 | 0 | 0 | 1 Ref      |
| MN871444 | Unassigned | Unassigned | Unassigned | 347_0  | Clustered           | 3 VC_347_0   | 3  | 0.1545 | 0.9984446  | 0.1543 | 0 | 0 | 0 | 1 Ref      |
| MN871445 | Unassigned | Unassigned | Unassigned | 347_0  | Clustered           | 3 VC_347_0   | 3  | 0.1545 | 0.9984446  | 0.1543 | 0 | 0 | 0 | 1 Ref      |
| MN871446 | Unassigned | Unassigned | Unassigned | 488_0  | Clustered           | 8 VC_488_0   | 8  | 0.2938 | 1          | 0.2938 | 0 | 0 | 0 | 1 Ref      |
| MN871447 | Unassigned | Unassigned | Unassigned | 488_0  | Clustered           | 8 VC_488_0   | 8  | 0.2938 | 1          | 0.2938 | 0 | 0 | 0 | 1 Ref      |
| MN871448 | Unassigned | Unassigned | Unassigned | 488_0  | Clustered           | 8 VC_488_0   | 8  | 0.2938 | 1          | 0.2938 | 0 | 0 | 0 | 1 Ref      |
| MN871449 | Unassigned | Unassigned | Unassigned | 488_0  | Clustered           | 8 VC_488_0   | 8  | 0.2938 | 1          | 0.2938 | 0 | 0 | 0 | 1 Ref      |
| MN871450 | Unassigned | Unassigned | Unassigned | 592_0  | Clustered           | 50 VC_592_0  | 50 | 0.7314 | 1          | 0.7314 | 0 | 0 | 0 | 1 Ref      |
| MN871451 | Unassigned | Unassigned | Unassigned | 488_0  | Clustered           | 8 VC_488_0   | 8  | 0.2938 | 1          | 0.2938 | 0 | 0 | 0 | 1 Ref      |
| MN871452 | Unassigned | Unassigned | Unassigned | 488_0  | Clustered           | 8 VC_488_0   | 8  | 0.2938 | 1          | 0.2938 | 0 | 0 | 0 | 1 Ref      |
| MN871453 | Unassigned | Unassigned | Unassigned | 488_0  | Clustered           | 8 VC_488_0   | 8  | 0.2938 | 1          | 0.2938 | 0 | 0 | 0 | 1 Ref      |
| MN871454 | Unassigned | Unassigned | Unassigned | 80_0   | Clustered           | 41 VC_80_0   | 41 | 0.5837 | 1          | 0.5837 | 0 | 0 | 0 | 0.9805 Ref |
| MN871455 | Unassigned | Unassigned | Unassigned | 423_0  | Clustered           | 45 VC_423_0  | 45 | 0.9484 | 1          | 0.9484 | 0 | 0 | 0 | 1 Ref      |
| MN871456 | Unassigned | Unassigned | Unassigned | 166_0  | Clustered           | 26 VC_166_0  | 26 | 0.7923 | 1          | 0.7923 | 0 | 0 | 0 | 1 Ref      |
| MN871457 | Unassigned | Unassigned | Unassigned | 79_6   | Clustered           | 11 VC_79_6   | 11 | 0.0528 | 1          | 0.0528 | 0 | 0 | 0 | 0.7455 Ref |
| MN871458 | Unassigned | Unassigned | Unassigned | 79_0   | Clustered           | 64 VC_79_0   | 64 | 0.4185 | 1          | 0.4185 | 0 | 0 | 0 | 0.7649 Ref |
| MN871459 | Unassigned | Unassigned | Unassigned | 79_0   | Clustered           | 64 VC_79_0   | 64 | 0.4185 | 1          | 0.4185 | 0 | 0 | 0 | 0.7649 Ref |
| MN871460 | Unassigned | Unassigned | Unassigned | 79_6   | Clustered           | 11 VC_79_6   | 11 | 0.0528 | 1          | 0.0528 | 0 | 0 | 0 | 0.7455 Ref |
| MN871461 | Unassigned | Unassigned | Unassigned | 79_0   | Clustered           | 64 VC_79_0   | 64 | 0.4185 | 1          | 0.4185 | 0 | 0 | 0 | 0.7649 Ref |
| MN871462 | Unassigned | Unassigned | Unassigned | 79_0   | Clustered           | 64 VC_79_0   | 64 | 0.4185 | 1          | 0.4185 | 0 | 0 | 0 | 0.7649 Ref |
| MN871463 | Unassigned | Unassigned | Unassigned | 166_0  | Clustered           | 26 VC_166_0  | 26 | 0.7923 | 1          | 0.7923 | 0 | 0 | 0 | 1 Ref      |
| MN871464 | Unassigned | Unassigned | Unassigned | 79_0   | Clustered           | 64 VC_79_0   | 64 | 0.4185 | 1          | 0.4185 | 0 | 0 | 0 | 0.7649 Ref |
| MN871465 | Unassigned | Unassigned | Unassigned | 79_0   | Clustered           | 64 VC_79_0   | 64 | 0.4185 | 1          | 0.4185 | 0 | 0 | 0 | 0.7649 Ref |
| MN871466 | Unassigned | Unassigned | Unassigned | 79_0   | Clustered           | 64 VC_79_0   | 64 | 0.4185 | 1          | 0.4185 | 0 | 0 | 0 | 0.7649 Ref |
| MN871467 | Unassigned | Unassigned | Unassigned | 79_6   | Clustered           | 11 VC_79_6   | 11 | 0.0528 | 1          | 0.0528 | 0 | 0 | 0 | 0.7455 Ref |
| MN871468 | Unassigned | Unassigned | Unassigned | 79_9   | Clustered           | 2 VC_79_9    | 2  | 0.0061 | 0.94860001 | 0.0058 | 0 | 0 | 0 | 1 Ref      |
| MN871469 | Unassigned | Unassigned | Unassigned | 166_0  | Clustered           | 26 VC_166_0  | 26 | 0.7923 | 1          | 0.7923 | 0 | 0 | 0 | 1 Ref      |
| MN871470 | Unassigned | Unassigned | Unassigned | 76_0   | Clustered           | 37 VC_76_0   | 37 | 0.9403 | 1          | 0.9403 | 0 | 0 | 0 | 1 Ref      |
| MN871471 | Unassigned | Unassigned | Unassigned | 796_0  | Clustered           | 5 VC_796_0   | 5  | 0.3352 | 0.99999997 | 0.3352 | 0 | 0 | 0 | 1 Ref      |
| MN871472 | Unassigned | Unassigned | Unassigned | 796_0  | Clustered           | 5 VC_796_0   | 5  | 0.3352 | 0.99999997 | 0.3352 | 0 | 0 | 0 | 1 Ref      |
| MN871473 | Unassigned | Unassigned | Unassigned | 79_0   | Clustered           | 64 VC_79_0   | 64 | 0.4185 | 1          | 0.4185 | 0 | 0 | 0 | 0.7649 Ref |
| MN871474 | Unassigned | Unassigned | Unassigned | 796_0  | Clustered           | 5 VC_796_0   | 5  | 0.3352 | 0.99999997 | 0.3352 | 0 | 0 | 0 | 1 Ref      |
| MN871475 | Unassigned | Unassigned | Unassigned | 133_29 | Clustered           | 2 VC_133_29  | 2  | 0.0052 | 0.8586516  | 0.0044 | 0 | 0 | 0 | 1 Ref      |
| MN871476 | Unassigned | Unassigned | Unassigned | 472_0  | Clustered           | 47 VC_472_0  | 47 | 0.9025 | 1          | 0.9025 | 0 | 0 | 0 | 1 Ref      |
| MN871478 | Unassigned | Unassigned | Unassigned | 166_0  | Clustered           | 26 VC_166_0  | 26 | 0.7923 | 1          | 0.7923 | 0 | 0 | 0 | 1 Ref      |
| MN871479 | Unassigned | Unassigned | Unassigned | 79_0   | Clustered           | 64 VC_79_0   | 64 | 0.4185 | 1          | 0.4185 | 0 | 0 | 0 | 0.7649 Ref |
| MN871480 | Unassigned | Unassigned | Unassigned | 344_0  | Clustered           | 21 VC_344_0  | 21 | 0.5436 | 1          | 0.5436 | 0 | 0 | 0 | 1 Ref      |
| MN871481 | Unassigned | Unassigned | Unassigned | 76_0   | Clustered           | 37 VC_76_0   | 37 | 0.9403 | 1          | 0.9403 | 0 | 0 | 0 | 1 Ref      |
| MN871482 | Unassigned | Unassigned | Unassigned | 166_0  | Clustered           | 26 VC_166_0  | 26 | 0.7923 | 1          | 0.7923 | 0 | 0 | 0 | 1 Ref      |
| MN871483 | Unassigned | Unassigned | Unassigned | 423_0  | Clustered           | 45 VC_423_0  | 45 | 0.9484 | 1          | 0.9484 | 0 | 0 | 0 | 1 Ref      |
| MN871484 | Unassigned | Unassigned | Unassigned | 472_0  | Clustered           | 47 VC_472_0  | 47 | 0.9025 | 1          | 0.9025 | 0 | 0 | 0 | 1 Ref      |
| MN871485 | Unassigned | Unassigned | Unassigned | 79_0   | Clustered           | 64 VC_79_0   | 64 | 0.4185 | 1          | 0.4185 | 0 | 0 | 0 | 0.7649 Ref |
| MN871486 | Unassigned | Unassigned | Unassigned | 166_0  | Clustered           | 26 VC_166_0  | 26 | 0.7923 | 1          | 0.7923 | 0 | 0 | 0 | 1 Ref      |
| MN871487 | Unassigned | Unassigned | Unassigned | 79_0   | Clustered           | 64 VC_79_0   | 64 | 0.4185 | 1          | 0.4185 | 0 | 0 | 0 | 0.7649 Ref |
| MN871488 | Unassigned | Unassigned | Unassigned | 76_0   | Clustered           | 37 VC_76_0   | 37 | 0.9403 | 1          | 0.9403 | 0 | 0 | 0 | 1 Ref      |
| MN871489 | Unassigned | Unassigned | Unassigned | 344_0  | Clustered           | 21 VC_344_0  | 21 | 0.5436 | 1          | 0.5436 | 0 | 0 | 0 | 1 Ref      |
| MN871490 | Unassigned | Unassigned | Unassigned | 461_0  | Clustered           | 96 VC_461_0  | 96 | 0.9307 | 1          | 0.9307 | 0 | 0 | 0 | 0.9575 Ref |
| MN871491 | Unassigned | Unassigned | Unassigned | 133_36 | Clustered           | 2 VC_133_36  | 2  | 0.0052 | 0.86421148 | 0.0045 | 0 | 0 | 0 | 1 Ref      |
| MN871492 | Unassigned | Unassigned | Unassigned | 133_36 | Clustered           | 2 VC_133_36  | 2  | 0.0052 | 0.86421148 | 0.0045 | 0 | 0 | 0 | 1 Ref      |
| MN871493 | Unassigned | Unassigned | Unassigned | 133_37 | Clustered/Singleton | 1 VC_133_37  | 1  | 0      | 1          | 0      | 0 | 0 | 0 | 1 Ref      |
| MN871494 | Unassigned | Unassigned | Unassigned | 133_12 | Clustered           | 2 VC_133_12  | 2  | 0.0051 | 0.8672083  | 0.0044 | 0 | 0 | 0 | 1 Ref      |
| MN871495 | Unassigned | Unassigned | Unassigned | 133_12 | Clustered           | 2 VC_133_12  | 2  | 0.0051 | 0.8672083  | 0.0044 | 0 | 0 | 0 | 1 Ref      |
| MN871496 | Unassigned | Unassigned | Unassigned | 133_43 | Clustered           | 4 VC_133_43  | 4  | 0.015  | 0.99995682 | 0.015  | 0 | 0 | 0 | 1 Ref      |
| MN871497 | Unassigned | Unassigned | Unassigned | 133_43 | Clustered           | 4 VC_133_43  | 4  | 0.015  | 0.99995682 | 0.015  | 0 | 0 | 0 | 1 Ref      |
| MN871498 | Unassigned | Unassigned | Unassigned | 133_43 | Clustered           | 4 VC_133_43  | 4  | 0.015  | 0.99995682 | 0.015  | 0 | 0 | 0 | 1 Ref      |
| MN871499 | Unassigned | Unassigned | Unassigned | 133_43 | Clustered           | 4 VC_133_43  | 4  | 0.015  | 0.99995682 | 0.015  | 0 | 0 | 0 | 1 Ref      |
| MN871500 | Unassigned | Unassigned | Unassigned | 133_19 | Clustered           | 2 VC_133_19  | 2  | 0.0051 | 0.8696643  | 0.0044 | 0 | 0 | 0 | 1 Ref      |
| MN871501 | Unassigned | Unassigned | Unassigned | 133_29 | Clustered           | 2 VC_133_29  | 2  | 0.0052 | 0.8586516  | 0.0044 | 0 | 0 | 0 | 1 Ref      |
| MN871502 | Unassigned | Unassigned | Unassigned | 133_38 | Clustered/Singleton | 1 VC_133_38  | 1  | 0      | 1          | 0      | 0 | 0 | 0 | 1 Ref      |
| MN871503 | Unassigned | Unassigned | Unassigned | 461_0  | Clustered           | 96 VC_461_0  | 96 | 0.9307 | 1          | 0.9307 | 0 | 0 | 0 | 0.9575 Ref |
| MN871504 | Unassigned | Unassigned | Unassigned | 133_10 | Clustered           | 10 VC_133_10 | 10 | 0.0527 | 1          | 0.0527 | 0 | 0 | 0 | 1 Ref      |
| MN871505 | Unassigned | Unassigned | Unassigned | 972_0  | Clustered           | 6 VC_972_0   | 6  | 0.2892 | 1          | 0.2892 | 0 | 0 | 0 | 1 Ref      |
| MN871506 | Unassigned | Unassigned | Unassigned | 904_2  | Clustered           | 7 VC_904_2   | 7  | 0.2857 | 1          | 0.2857 | 0 | 0 | 0 | 1 Ref      |
| MN871507 | Unassigned | Unassigned | Unassigned | 600_0  | Clustered           | 3 VC_600_0   | 3  | 0.0541 | 0.97110069 | 0.0526 | 0 | 0 | 0 | 1 Ref      |



|          |            |            |            |        |                     |              |    |        |            |        |   |   |   |        |     |
|----------|------------|------------|------------|--------|---------------------|--------------|----|--------|------------|--------|---|---|---|--------|-----|
| MN871508 | Unassigned | Unassigned | Unassigned | 79_0   | Clustered           | 64 VC_79_0   | 64 | 0.4185 | 1          | 0.4185 | 0 | 0 | 0 | 0.7649 | Ref |
| MN871509 | Unassigned | Unassigned | Unassigned | 79_0   | Clustered           | 64 VC_79_0   | 64 | 0.4185 | 1          | 0.4185 | 0 | 0 | 0 | 0.7649 | Ref |
| MN871510 | Unassigned | Unassigned | Unassigned | 972_0  | Clustered           | 6 VC_972_0   | 6  | 0.2892 | 1          | 0.2892 | 0 | 0 | 0 | 1      | Ref |
| MN871511 | Unassigned | Unassigned | Unassigned | 972_0  | Clustered           | 6 VC_972_0   | 6  | 0.2892 | 1          | 0.2892 | 0 | 0 | 0 | 1      | Ref |
| MN876841 | Unassigned | Unassigned | Unassigned | 348_0  | Clustered           | 22 VC_348_0  | 22 | 0.9602 | 1          | 0.9602 | 0 | 0 | 0 | 1      | Ref |
| MN876842 | Unassigned | Unassigned | Unassigned | 348_0  | Clustered           | 22 VC_348_0  | 22 | 0.9602 | 1          | 0.9602 | 0 | 0 | 0 | 1      | Ref |
| MN876843 | Unassigned | Unassigned | Unassigned | 348_0  | Clustered           | 22 VC_348_0  | 22 | 0.9602 | 1          | 0.9602 | 0 | 0 | 0 | 1      | Ref |
| MN876845 | Unassigned | Unassigned | Unassigned | 440_0  | Clustered           | 4 VC_440_0   | 4  | 1      | 1          | 1      | 0 | 0 | 0 | 1      | Ref |
| MN882349 | Unassigned | Unassigned | Unassigned | 590_0  | Clustered           | 27 VC_590_0  | 27 | 0.9947 | 1          | 0.9947 | 0 | 0 | 0 | 1      | Ref |
| MN882542 | Unassigned | Unassigned | Unassigned | 329_18 | Clustered           | 7 VC_329_18  | 7  | 0.0328 | 1          | 0.0328 | 0 | 0 | 0 | 0.8095 | Ref |
| MN882551 | Unassigned | Unassigned | Unassigned | 1413_0 | Clustered           | 2 VC_1413_0  | 2  | 0.6796 | 0.89435023 | 0.6078 | 0 | 0 | 0 | 1      | Ref |
| MN882552 | Unassigned | Unassigned | Unassigned | 1413_0 | Clustered           | 2 VC_1413_0  | 2  | 0.6796 | 0.89435023 | 0.6078 | 0 | 0 | 0 | 1      | Ref |
| MN882610 | Unassigned | Unassigned | Unassigned | 490_1  | Clustered           | 5 VC_490_1   | 5  | 0.0447 | 0.99999996 | 0.0447 | 0 | 0 | 0 | 1      | Ref |
| MN890136 | Unassigned | Unassigned | Unassigned | 721_0  | Clustered           | 9 VC_721_0   | 9  | 1      | 1          | 1      | 0 | 0 | 0 | 1      | Ref |
| MN890137 | Unassigned | Unassigned | Unassigned | 721_0  | Clustered           | 9 VC_721_0   | 9  | 1      | 1          | 1      | 0 | 0 | 0 | 1      | Ref |
| MN890138 | Unassigned | Unassigned | Unassigned | 721_0  | Clustered           | 9 VC_721_0   | 9  | 1      | 1          | 1      | 0 | 0 | 0 | 1      | Ref |
| MN890139 | Unassigned | Unassigned | Unassigned | 721_0  | Clustered           | 9 VC_721_0   | 9  | 1      | 1          | 1      | 0 | 0 | 0 | 1      | Ref |
| MN890140 | Unassigned | Unassigned | Unassigned | 721_0  | Clustered           | 9 VC_721_0   | 9  | 1      | 1          | 1      | 0 | 0 | 0 | 1      | Ref |
| MN890141 | Unassigned | Unassigned | Unassigned | 721_0  | Clustered           | 9 VC_721_0   | 9  | 1      | 1          | 1      | 0 | 0 | 0 | 1      | Ref |
| MN890142 | Unassigned | Unassigned | Unassigned | 721_0  | Clustered           | 9 VC_721_0   | 9  | 1      | 1          | 1      | 0 | 0 | 0 | 1      | Ref |
| MN890143 | Unassigned | Unassigned | Unassigned | 721_0  | Clustered           | 9 VC_721_0   | 9  | 1      | 1          | 1      | 0 | 0 | 0 | 1      | Ref |
| MN892483 | Unassigned | Unassigned | Unassigned | 1240_0 | Clustered           | 82 VC_1240_0 | 82 | 0.7945 | 1          | 0.7945 | 0 | 0 | 0 | 1      | Ref |
| MN892484 | Unassigned | Unassigned | Unassigned | 519_0  | Clustered           | 39 VC_519_0  | 39 | 0.8156 | 1          | 0.8156 | 0 | 0 | 0 | 1      | Ref |
| MN892486 | Unassigned | Unassigned | Unassigned | 519_0  | Clustered           | 39 VC_519_0  | 39 | 0.8156 | 1          | 0.8156 | 0 | 0 | 0 | 1      | Ref |
| MN892487 | Unassigned | Unassigned | Unassigned | 221_0  | Clustered           | 22 VC_221_0  | 22 | 0.7447 | 1          | 0.7447 | 0 | 0 | 0 | 1      | Ref |
| MN894885 | Unassigned | Unassigned | Unassigned | 590_0  | Clustered           | 27 VC_590_0  | 27 | 0.9947 | 1          | 0.9947 | 0 | 0 | 0 | 1      | Ref |
| MN895434 | Unassigned | Unassigned | Unassigned | 283_39 | Clustered/Singleton | 1 VC_283_39  | 1  | 0      | 1          | 0      | 0 | 0 | 0 | 1      | Ref |
| MN895435 | Unassigned | Unassigned | Unassigned | 283_51 | Clustered/Singleton | 1 VC_283_51  | 1  | 0      | 1          | 0      | 0 | 0 | 0 | 1      | Ref |
| MN895436 | Unassigned | Unassigned | Unassigned | 283_48 | Clustered/Singleton | 1 VC_283_48  | 1  | 0      | 1          | 0      | 0 | 0 | 0 | 1      | Ref |
| MN895437 | Unassigned | Unassigned | Unassigned | 283_31 | Clustered/Singleton | 1 VC_283_31  | 1  | 0      | 1          | 0      | 0 | 0 | 0 | 1      | Ref |
| MN895438 | Unassigned | Unassigned | Unassigned | 283_44 | Clustered/Singleton | 1 VC_283_44  | 1  | 0      | 1          | 0      | 0 | 0 | 0 | 1      | Ref |
| MN901520 | Unassigned | Unassigned | Unassigned | 310_0  | Clustered           | 33 VC_310_0  | 33 | 0.8771 | 1          | 0.8771 | 0 | 0 | 0 | 1      | Ref |
| MN901521 | Unassigned | Unassigned | Unassigned | 310_0  | Clustered           | 33 VC_310_0  | 33 | 0.8771 | 1          | 0.8771 | 0 | 0 | 0 | 1      | Ref |
| MN901924 | Unassigned | Unassigned | Unassigned | 423_0  | Clustered           | 45 VC_423_0  | 45 | 0.9484 | 1          | 0.9484 | 0 | 0 | 0 | 1      | Ref |
| MN904502 | Unassigned | Unassigned | Unassigned | 980_0  | Clustered           | 10 VC_980_0  | 10 | 0.9996 | 1          | 0.9996 | 0 | 0 | 0 | 1      | Ref |
| MN904510 | Unassigned | Unassigned | Unassigned | 12_2   | Clustered           | 19 VC_12_2   | 19 | 0.2018 | 1          | 0.2018 | 0 | 0 | 0 | 1      | Ref |
| MN905160 | Unassigned | Unassigned | Unassigned | 78_3   | Clustered           | 11 VC_78_3   | 11 | 0.2572 | 1          | 0.2572 | 0 | 0 | 0 | 1      | Ref |
| MN906996 | Unassigned | Unassigned | Unassigned | 838_0  | Clustered           | 29 VC_838_0  | 29 | 0.8611 | 1          | 0.8611 | 0 | 0 | 0 | 1      | Ref |
| MN908683 | Unassigned | Unassigned | Unassigned | 519_0  | Clustered           | 39 VC_519_0  | 39 | 0.8156 | 1          | 0.8156 | 0 | 0 | 0 | 1      | Ref |
| MN908685 | Unassigned | Unassigned | Unassigned | 1100_0 | Clustered           | 2 VC_1100_0  | 2  | 0.1285 | 0.94673154 | 0.1217 | 0 | 0 | 0 | 1      | Ref |
| MN908689 | Unassigned | Unassigned | Unassigned | 1207_0 | Clustered           | 29 VC_1207_0 | 29 | 0.8225 | 1          | 0.8225 | 0 | 0 | 0 | 1      | Ref |
| MN908690 | Unassigned | Unassigned | Unassigned | 856_1  | Clustered           | 13 VC_856_1  | 13 | 0.5848 | 1          | 0.5848 | 0 | 0 | 0 | 1      | Ref |
| MN908691 | Unassigned | Unassigned | Unassigned | 1182_0 | Clustered           | 4 VC_1182_0  | 4  | 0.2845 | 0.99997676 | 0.2845 | 0 | 0 | 0 | 1      | Ref |
| MN908692 | Unassigned | Unassigned | Unassigned | 236_0  | Clustered           | 72 VC_236_0  | 72 | 0.8104 | 1          | 0.8104 | 0 | 0 | 0 | 1      | Ref |
| MN908693 | Unassigned | Unassigned | Unassigned | 510_0  | Clustered           | 12 VC_510_0  | 12 | 0.3963 | 1          | 0.3963 | 0 | 0 | 0 | 0.9697 | Ref |
| MN927225 | Unassigned | Unassigned | Unassigned | 638_0  | Clustered           | 45 VC_638_0  | 45 | 0.7741 | 1          | 0.7741 | 0 | 0 | 0 | 1      | Ref |
| MN927226 | Unassigned | Unassigned | Unassigned | 638_0  | Clustered           | 45 VC_638_0  | 45 | 0.7741 | 1          | 0.7741 | 0 | 0 | 0 | 1      | Ref |
| MN929097 | Unassigned | Unassigned | Unassigned | 831_0  | Clustered           | 5 VC_831_0   | 5  | 0.4369 | 0.99999952 | 0.4369 | 0 | 0 | 0 | 1      | Ref |
| MN935200 | Unassigned | Unassigned | Unassigned | 149_28 | Clustered/Singleton | 1 VC_149_28  | 1  | 0      | 1          | 0      | 0 | 0 | 0 | 1      | Ref |
| MN937349 | Unassigned | Unassigned | Unassigned | 671_0  | Clustered           | 5 VC_671_0   | 5  | 0.5289 | 0.99999996 | 0.5289 | 0 | 0 | 0 | 1      | Ref |
| MN939408 | Unassigned | Unassigned | Unassigned | 108_0  | Clustered           | 33 VC_108_0  | 33 | 0.949  | 1          | 0.949  | 0 | 0 | 0 | 1      | Ref |
| MN939539 | Unassigned | Unassigned | Unassigned | 739_0  | Clustered           | 26 VC_739_0  | 26 | 0.9571 | 1          | 0.9571 | 0 | 0 | 0 | 1      | Ref |
| MN939540 | Unassigned | Unassigned | Unassigned | 739_0  | Clustered           | 26 VC_739_0  | 26 | 0.9571 | 1          | 0.9571 | 0 | 0 | 0 | 1      | Ref |
| MN940411 | Unassigned | Unassigned | Unassigned | 85_11  | Clustered/Singleton | 1 VC_85_11   | 1  | 0      | 1          | 0      | 0 | 0 | 0 | 1      | Ref |
| MN945899 | Unassigned | Unassigned | Unassigned | 371_16 | Clustered           | 42 VC_371_16 | 42 | 0.1341 | 1          | 0.1341 | 0 | 0 | 0 | 0.7282 | Ref |
| MN945901 | Unassigned | Unassigned | Unassigned | 237_2  | Clustered           | 11 VC_237_2  | 11 | 0.1409 | 1          | 0.1409 | 0 | 0 | 0 | 0.9818 | Ref |
| MN945902 | Unassigned | Unassigned | Unassigned | 956_0  | Clustered           | 39 VC_956_0  | 39 | 1      | 1          | 1      | 0 | 0 | 0 | 1      | Ref |
| MN945903 | Unassigned | Unassigned | Unassigned | 371_13 | Clustered           | 33 VC_371_13 | 33 | 0.179  | 1          | 0.179  | 0 | 0 | 0 | 0.8769 | Ref |
| MN945904 | Unassigned | Unassigned | Unassigned | 234_0  | Clustered           | 21 VC_234_0  | 21 | 0.8355 | 1          | 0.8355 | 0 | 0 | 0 | 1      | Ref |
| MN945905 | Unassigned | Unassigned | Unassigned | 868_0  | Clustered           | 25 VC_868_0  | 25 | 0.5791 | 1          | 0.5791 | 0 | 0 | 0 | 1      | Ref |
| MN953776 | Unassigned | Unassigned | Unassigned | 133_14 | Clustered           | 3 VC_133_14  | 3  | 0.0102 | 0.96327256 | 0.0098 | 0 | 0 | 0 | 1      | Ref |
| MN954399 | Unassigned | Unassigned | Unassigned | 971_1  | Clustered           | 24 VC_971_1  | 24 | 0.7393 | 1          | 0.7393 | 0 | 0 | 0 | 0.8913 | Ref |
| MN956514 | Unassigned | Unassigned | Unassigned | 190_25 | Clustered/Singleton | 1 VC_190_25  | 1  | 0      | 1          | 0      | 0 | 0 | 0 | 1      | Ref |
| MN958086 | Unassigned | Unassigned | Unassigned | 971_1  | Clustered           | 24 VC_971_1  | 24 | 0.7393 | 1          | 0.7393 | 0 | 0 | 0 | 0.8913 | Ref |
| MN966730 | Unassigned | Unassigned | Unassigned | 971_1  | Clustered           | 24 VC_971_1  | 24 | 0.7393 | 1          | 0.7393 | 0 | 0 | 0 | 0.8913 | Ref |
| MN966731 | Unassigned | Unassigned | Unassigned | 971_1  | Clustered           | 24 VC_971_1  | 24 | 0.7393 | 1          | 0.7393 | 0 | 0 | 0 | 0.8913 | Ref |
| MN966732 | Unassigned | Unassigned | Unassigned | 971_1  | Clustered           | 24 VC_971_1  | 24 | 0.7393 | 1          | 0.7393 | 0 | 0 | 0 | 0.8913 | Ref |
| MN970211 | Unassigned | Unassigned | Unassigned | 190_13 | Clustered           | 4 VC_190_13  | 4  | 0.0216 | 0.99997041 | 0.0216 | 0 | 0 | 0 | 0.6667 | Ref |
| MN974282 | Unassigned | Unassigned | Unassigned | 837_0  | Clustered           | 29 VC_837_0  | 29 | 0.9955 | 1          | 0.9955 | 0 | 0 | 0 | 1      | Ref |
| MN988459 | Unassigned | Unassigned | Unassigned | 886_0  | Clustered           | 2 VC_886_0   | 2  | 0.1375 | 0.95352335 | 0.1311 | 0 | 0 | 0 | 1      | Ref |
| MN988460 | Unassigned | Unassigned | Unassigned | 1403_0 | Clustered           | 28 VC_1403_0 | 28 | 0.753  | 1          | 0.753  | 0 | 0 | 0 | 1      | Ref |
| MN988461 | Unassigned | Unassigned | Unassigned | 1414_0 | Clustered           | 4 VC_1414_0  | 4  | 1      | 0          | 0      | 0 | 0 | 0 | 1      | Ref |
| MN988462 | Unassigned | Unassigned | Unassigned | 1414_0 | Clustered           | 4 VC_1414_0  | 4  | 1      | 0          | 0      | 0 | 0 | 0 | 1      | Ref |
| MN988463 | Unassigned | Unassigned | Unassigned | 1414_0 | Clustered           | 4 VC_1414_0  | 4  | 1      | 0          | 0      | 0 | 0 | 0 | 1      | Ref |
| MN988465 | Unassigned | Unassigned | Unassigned | 468_0  | Clustered           | 4 VC_468_0   | 4  | 0.143  | 0.99998478 | 0.143  | 0 | 0 | 0 | 1      | Ref |
| MN988466 | Unassigned | Unassigned | Unassigned | 987_0  | Clustered           | 22 VC_987_0  | 22 | 0.8955 | 1          | 0.8955 | 0 | 0 | 0 | 1      | Ref |
| MN988467 | Unassigned | Unassigned | Unassigned | 1403_0 | Clustered           | 28 VC_1403_0 | 28 | 0.753  | 1          | 0.753  | 0 | 0 | 0 | 1      | Ref |
| MN988468 | Unassigned | Unassigned | Unassigned | 1045_0 | Clustered           | 2 VC_1045_0  | 2  | 0.4318 | 0.94398033 | 0.4076 | 0 | 0 | 0 | 1      | Ref |
| MN988469 | Unassigned | Unassigned | Unassigned | 1403_0 | Clustered           | 28 VC_1403_0 | 28 | 0.753  | 1          | 0.753  | 0 | 0 | 0 | 1      | Ref |
| MN988470 | Unassigned | Unassigned | Unassigned | 970_0  | Clustered           | 9 VC_970_0   | 9  | 0.9685 | 1          | 0.9685 | 0 | 0 | 0 | 1      | Ref |
| MN988471 | Unassigned | Unassigned | Unassigned | 1403_0 | Clustered           | 28 VC_1403_0 | 28 | 0.753  | 1          | 0.753  | 0 | 0 | 0 | 1      | Ref |



|          |            |            |            |        |                     |    |           |    |        |            |        |   |   |   |   |   |       |
|----------|------------|------------|------------|--------|---------------------|----|-----------|----|--------|------------|--------|---|---|---|---|---|-------|
| MN988472 | Unassigned | Unassigned | Unassigned | 1414_0 | Clustered           | 4  | VC_1414_0 | 4  | 1      | 0          | 0      | 0 | 0 | 0 | 0 | 0 | 1 Ref |
| MN988473 | Unassigned | Unassigned | Unassigned | 1403_0 | Clustered           | 28 | VC_1403_0 | 28 | 0.753  | 1          | 0.753  | 0 | 0 | 0 | 0 | 0 | 1 Ref |
| MN988474 | Unassigned | Unassigned | Unassigned | 1403_0 | Clustered           | 28 | VC_1403_0 | 28 | 0.753  | 1          | 0.753  | 0 | 0 | 0 | 0 | 0 | 1 Ref |
| MN988475 | Unassigned | Unassigned | Unassigned | 1403_0 | Clustered           | 28 | VC_1403_0 | 28 | 0.753  | 1          | 0.753  | 0 | 0 | 0 | 0 | 0 | 1 Ref |
| MN988478 | Unassigned | Unassigned | Unassigned | 1403_0 | Clustered           | 28 | VC_1403_0 | 28 | 0.753  | 1          | 0.753  | 0 | 0 | 0 | 0 | 0 | 1 Ref |
| MN988479 | Unassigned | Unassigned | Unassigned | 1403_0 | Clustered           | 28 | VC_1403_0 | 28 | 0.753  | 1          | 0.753  | 0 | 0 | 0 | 0 | 0 | 1 Ref |
| MN988480 | Unassigned | Unassigned | Unassigned | 1403_0 | Clustered           | 28 | VC_1403_0 | 28 | 0.753  | 1          | 0.753  | 0 | 0 | 0 | 0 | 0 | 1 Ref |
| MN988481 | Unassigned | Unassigned | Unassigned | 1403_0 | Clustered           | 28 | VC_1403_0 | 28 | 0.753  | 1          | 0.753  | 0 | 0 | 0 | 0 | 0 | 1 Ref |
| MN988482 | Unassigned | Unassigned | Unassigned | 946_0  | Clustered           | 11 | VC_946_0  | 11 | 0.7352 | 1          | 0.7352 | 0 | 0 | 0 | 0 | 0 | 1 Ref |
| MN988484 | Unassigned | Unassigned | Unassigned | 970_0  | Clustered           | 9  | VC_970_0  | 9  | 0.9685 | 1          | 0.9685 | 0 | 0 | 0 | 0 | 0 | 1 Ref |
| MN988485 | Unassigned | Unassigned | Unassigned | 1415_0 | Clustered           | 2  | VC_1415_0 | 2  | 1      | 1          | 1      | 0 | 0 | 0 | 0 | 0 | 1 Ref |
| MN988486 | Unassigned | Unassigned | Unassigned | 1052_4 | Clustered           | 6  | VC_1052_4 | 6  | 0.2437 | 0.99795925 | 0.2432 | 0 | 0 | 0 | 0 | 0 | 1 Ref |
| MN988488 | Unassigned | Unassigned | Unassigned | 987_0  | Clustered           | 22 | VC_987_0  | 22 | 0.8955 | 1          | 0.8955 | 0 | 0 | 0 | 0 | 0 | 1 Ref |
| MN988489 | Unassigned | Unassigned | Unassigned | 1403_0 | Clustered           | 28 | VC_1403_0 | 28 | 0.753  | 1          | 0.753  | 0 | 0 | 0 | 0 | 0 | 1 Ref |
| MN988490 | Unassigned | Unassigned | Unassigned | 771_0  | Clustered           | 2  | VC_771_0  | 2  | 0.762  | 0.91600907 | 0.698  | 0 | 0 | 0 | 0 | 0 | 1 Ref |
| MN988491 | Unassigned | Unassigned | Unassigned | 1403_0 | Clustered           | 28 | VC_1403_0 | 28 | 0.753  | 1          | 0.753  | 0 | 0 | 0 | 0 | 0 | 1 Ref |
| MN988492 | Unassigned | Unassigned | Unassigned | 987_0  | Clustered           | 22 | VC_987_0  | 22 | 0.8955 | 1          | 0.8955 | 0 | 0 | 0 | 0 | 0 | 1 Ref |
| MN988493 | Unassigned | Unassigned | Unassigned | 987_0  | Clustered           | 22 | VC_987_0  | 22 | 0.8955 | 1          | 0.8955 | 0 | 0 | 0 | 0 | 0 | 1 Ref |
| MN988494 | Unassigned | Unassigned | Unassigned | 1403_0 | Clustered           | 28 | VC_1403_0 | 28 | 0.753  | 1          | 0.753  | 0 | 0 | 0 | 0 | 0 | 1 Ref |
| MN988495 | Unassigned | Unassigned | Unassigned | 970_0  | Clustered           | 9  | VC_970_0  | 9  | 0.9685 | 1          | 0.9685 | 0 | 0 | 0 | 0 | 0 | 1 Ref |
| MN988496 | Unassigned | Unassigned | Unassigned | 770_0  | Clustered           | 5  | VC_770_0  | 5  | 0.8394 | 0.99999405 | 0.8394 | 0 | 0 | 0 | 0 | 0 | 1 Ref |
| MN988498 | Unassigned | Unassigned | Unassigned | 1403_0 | Clustered           | 28 | VC_1403_0 | 28 | 0.753  | 1          | 0.753  | 0 | 0 | 0 | 0 | 0 | 1 Ref |
| MN988499 | Unassigned | Unassigned | Unassigned | 1403_0 | Clustered           | 28 | VC_1403_0 | 28 | 0.753  | 1          | 0.753  | 0 | 0 | 0 | 0 | 0 | 1 Ref |
| MN988500 | Unassigned | Unassigned | Unassigned | 946_0  | Clustered           | 11 | VC_946_0  | 11 | 0.7352 | 1          | 0.7352 | 0 | 0 | 0 | 0 | 0 | 1 Ref |
| MN988501 | Unassigned | Unassigned | Unassigned | 946_0  | Clustered           | 11 | VC_946_0  | 11 | 0.7352 | 1          | 0.7352 | 0 | 0 | 0 | 0 | 0 | 1 Ref |
| MN988502 | Unassigned | Unassigned | Unassigned | 771_0  | Clustered           | 2  | VC_771_0  | 2  | 0.762  | 0.91600907 | 0.698  | 0 | 0 | 0 | 0 | 0 | 1 Ref |
| MN988503 | Unassigned | Unassigned | Unassigned | 1403_0 | Clustered           | 28 | VC_1403_0 | 28 | 0.753  | 1          | 0.753  | 0 | 0 | 0 | 0 | 0 | 1 Ref |
| MN988504 | Unassigned | Unassigned | Unassigned | 1403_0 | Clustered           | 28 | VC_1403_0 | 28 | 0.753  | 1          | 0.753  | 0 | 0 | 0 | 0 | 0 | 1 Ref |
| MN988505 | Unassigned | Unassigned | Unassigned | 724_1  | Clustered           | 6  | VC_724_1  | 6  | 0.4379 | 1          | 0.4379 | 0 | 0 | 0 | 0 | 0 | 1 Ref |
| MN988506 | Unassigned | Unassigned | Unassigned | 724_1  | Clustered           | 6  | VC_724_1  | 6  | 0.4379 | 1          | 0.4379 | 0 | 0 | 0 | 0 | 0 | 1 Ref |
| MN988507 | Unassigned | Unassigned | Unassigned | 759_0  | Clustered           | 3  | VC_759_0  | 3  | 0.4748 | 0.99813327 | 0.4739 | 0 | 0 | 0 | 0 | 0 | 1 Ref |
| MN988508 | Unassigned | Unassigned | Unassigned | 946_0  | Clustered           | 11 | VC_946_0  | 11 | 0.7352 | 1          | 0.7352 | 0 | 0 | 0 | 0 | 0 | 1 Ref |
| MN988509 | Unassigned | Unassigned | Unassigned | 1052_4 | Clustered           | 6  | VC_1052_4 | 6  | 0.2437 | 0.99795925 | 0.2432 | 0 | 0 | 0 | 0 | 0 | 1 Ref |
| MN988510 | Unassigned | Unassigned | Unassigned | 759_0  | Clustered           | 3  | VC_759_0  | 3  | 0.4748 | 0.99813327 | 0.4739 | 0 | 0 | 0 | 0 | 0 | 1 Ref |
| MN988511 | Unassigned | Unassigned | Unassigned | 1403_0 | Clustered           | 28 | VC_1403_0 | 28 | 0.753  | 1          | 0.753  | 0 | 0 | 0 | 0 | 0 | 1 Ref |
| MN988512 | Unassigned | Unassigned | Unassigned | 987_0  | Clustered           | 22 | VC_987_0  | 22 | 0.8955 | 1          | 0.8955 | 0 | 0 | 0 | 0 | 0 | 1 Ref |
| MN988513 | Unassigned | Unassigned | Unassigned | 987_0  | Clustered           | 22 | VC_987_0  | 22 | 0.8955 | 1          | 0.8955 | 0 | 0 | 0 | 0 | 0 | 1 Ref |
| MN988514 | Unassigned | Unassigned | Unassigned | 987_0  | Clustered           | 22 | VC_987_0  | 22 | 0.8955 | 1          | 0.8955 | 0 | 0 | 0 | 0 | 0 | 1 Ref |
| MN988515 | Unassigned | Unassigned | Unassigned | 1416_0 | Clustered           | 5  | VC_1416_0 | 5  | 0.9955 | 0.99988353 | 0.9954 | 0 | 0 | 0 | 0 | 0 | 1 Ref |
| MN988516 | Unassigned | Unassigned | Unassigned | 1045_0 | Clustered           | 2  | VC_1045_0 | 2  | 0.4318 | 0.94398033 | 0.4076 | 0 | 0 | 0 | 0 | 0 | 1 Ref |
| MN988518 | Unassigned | Unassigned | Unassigned | 1403_0 | Clustered           | 28 | VC_1403_0 | 28 | 0.753  | 1          | 0.753  | 0 | 0 | 0 | 0 | 0 | 1 Ref |
| MN988520 | Unassigned | Unassigned | Unassigned | 1052_4 | Clustered           | 6  | VC_1052_4 | 6  | 0.2437 | 0.99795925 | 0.2432 | 0 | 0 | 0 | 0 | 0 | 1 Ref |
| MN988521 | Unassigned | Unassigned | Unassigned | 1203_0 | Clustered           | 7  | VC_1203_0 | 7  | 0.6515 | 1          | 0.6515 | 0 | 0 | 0 | 0 | 0 | 1 Ref |
| MN988522 | Unassigned | Unassigned | Unassigned | 1203_0 | Clustered           | 7  | VC_1203_0 | 7  | 0.6515 | 1          | 0.6515 | 0 | 0 | 0 | 0 | 0 | 1 Ref |
| MN988523 | Unassigned | Unassigned | Unassigned | 1203_0 | Clustered           | 7  | VC_1203_0 | 7  | 0.6515 | 1          | 0.6515 | 0 | 0 | 0 | 0 | 0 | 1 Ref |
| MN988524 | Unassigned | Unassigned | Unassigned | 1203_0 | Clustered           | 7  | VC_1203_0 | 7  | 0.6515 | 1          | 0.6515 | 0 | 0 | 0 | 0 | 0 | 1 Ref |
| MN988525 | Unassigned | Unassigned | Unassigned | 1203_0 | Clustered           | 7  | VC_1203_0 | 7  | 0.6515 | 1          | 0.6515 | 0 | 0 | 0 | 0 | 0 | 1 Ref |
| MN988526 | Unassigned | Unassigned | Unassigned | 342_0  | Clustered           | 2  | VC_342_0  | 2  | 0.1817 | 0.93411407 | 0.1698 | 0 | 0 | 0 | 0 | 0 | 1 Ref |
| MN988527 | Unassigned | Unassigned | Unassigned | 759_0  | Clustered           | 3  | VC_759_0  | 3  | 0.4748 | 0.99813327 | 0.4739 | 0 | 0 | 0 | 0 | 0 | 1 Ref |
| MN988528 | Unassigned | Unassigned | Unassigned | 987_0  | Clustered           | 22 | VC_987_0  | 22 | 0.8955 | 1          | 0.8955 | 0 | 0 | 0 | 0 | 0 | 1 Ref |
| MN988529 | Unassigned | Unassigned | Unassigned | 987_0  | Clustered           | 22 | VC_987_0  | 22 | 0.8955 | 1          | 0.8955 | 0 | 0 | 0 | 0 | 0 | 1 Ref |
| MN988530 | Unassigned | Unassigned | Unassigned | 946_0  | Clustered           | 11 | VC_946_0  | 11 | 0.7352 | 1          | 0.7352 | 0 | 0 | 0 | 0 | 0 | 1 Ref |
| MN988531 | Unassigned | Unassigned | Unassigned | 970_0  | Clustered           | 9  | VC_970_0  | 9  | 0.9685 | 1          | 0.9685 | 0 | 0 | 0 | 0 | 0 | 1 Ref |
| MN988532 | Unassigned | Unassigned | Unassigned | 1052_4 | Clustered           | 6  | VC_1052_4 | 6  | 0.2437 | 0.99795925 | 0.2432 | 0 | 0 | 0 | 0 | 0 | 1 Ref |
| MN988533 | Unassigned | Unassigned | Unassigned | 908_0  | Clustered           | 3  | VC_908_0  | 3  | 0.5083 | 0.9972453  | 0.5069 | 0 | 0 | 0 | 0 | 0 | 1 Ref |
| MN988534 | Unassigned | Unassigned | Unassigned | 1052_4 | Clustered           | 6  | VC_1052_4 | 6  | 0.2437 | 0.99795925 | 0.2432 | 0 | 0 | 0 | 0 | 0 | 1 Ref |
| MN988535 | Unassigned | Unassigned | Unassigned | 1416_0 | Clustered           | 5  | VC_1416_0 | 5  | 0.9955 | 0.99988353 | 0.9954 | 0 | 0 | 0 | 0 | 0 | 1 Ref |
| MN988536 | Unassigned | Unassigned | Unassigned | 935_0  | Clustered           | 2  | VC_935_0  | 2  | 0.7079 | 0.72985431 | 0.5167 | 0 | 0 | 0 | 0 | 0 | 1 Ref |
| MN988537 | Unassigned | Unassigned | Unassigned | 970_0  | Clustered           | 9  | VC_970_0  | 9  | 0.9685 | 1          | 0.9685 | 0 | 0 | 0 | 0 | 0 | 1 Ref |
| MN988538 | Unassigned | Unassigned | Unassigned | 908_0  | Clustered           | 3  | VC_908_0  | 3  | 0.5083 | 0.9972453  | 0.5069 | 0 | 0 | 0 | 0 | 0 | 1 Ref |
| MN988540 | Unassigned | Unassigned | Unassigned | 1416_0 | Clustered           | 5  | VC_1416_0 | 5  | 0.9955 | 0.99988353 | 0.9954 | 0 | 0 | 0 | 0 | 0 | 1 Ref |
| MN988541 | Unassigned | Unassigned | Unassigned | 468_0  | Clustered           | 4  | VC_468_0  | 4  | 0.143  | 0.99998478 | 0.143  | 0 | 0 | 0 | 0 | 0 | 1 Ref |
| MN988543 | Unassigned | Unassigned | Unassigned | 724_1  | Clustered           | 6  | VC_724_1  | 6  | 0.4379 | 1          | 0.4379 | 0 | 0 | 0 | 0 | 0 | 1 Ref |
| MN988544 | Unassigned | Unassigned | Unassigned | 970_0  | Clustered           | 9  | VC_970_0  | 9  | 0.9685 | 1          | 0.9685 | 0 | 0 | 0 | 0 | 0 | 1 Ref |
| MN988545 | Unassigned | Unassigned | Unassigned | 946_0  | Clustered           | 11 | VC_946_0  | 11 | 0.7352 | 1          | 0.7352 | 0 | 0 | 0 | 0 | 0 | 1 Ref |
| MN988546 | Unassigned | Unassigned | Unassigned | 970_0  | Clustered           | 9  | VC_970_0  | 9  | 0.9685 | 1          | 0.9685 | 0 | 0 | 0 | 0 | 0 | 1 Ref |
| MN988547 | Unassigned | Unassigned | Unassigned | 724_1  | Clustered           | 6  | VC_724_1  | 6  | 0.4379 | 1          | 0.4379 | 0 | 0 | 0 | 0 | 0 | 1 Ref |
| MN988548 | Unassigned | Unassigned | Unassigned | 724_1  | Clustered           | 6  | VC_724_1  | 6  | 0.4379 | 1          | 0.4379 | 0 | 0 | 0 | 0 | 0 | 1 Ref |
| MN988549 | Unassigned | Unassigned | Unassigned | 946_0  | Clustered           | 11 | VC_946_0  | 11 | 0.7352 | 1          | 0.7352 | 0 | 0 | 0 | 0 | 0 | 1 Ref |
| MN988550 | Unassigned | Unassigned | Unassigned | 1415_0 | Clustered           | 2  | VC_1415_0 | 2  | 1      | 1          | 1      | 0 | 0 | 0 | 0 | 0 | 1 Ref |
| MN988551 | Unassigned | Unassigned | Unassigned | 744_0  | Clustered           | 10 | VC_744_0  | 10 | 0.7049 | 1          | 0.7049 | 0 | 0 | 0 | 0 | 0 | 1 Ref |
| MN988552 | Unassigned | Unassigned | Unassigned | 990_0  | Clustered           | 3  | VC_990_0  | 3  | 0.6363 | 0.99819562 | 0.6351 | 0 | 0 | 0 | 0 | 0 | 1 Ref |
| MN988553 | Unassigned | Unassigned | Unassigned | 1052_4 | Clustered           | 6  | VC_1052_4 | 6  | 0.2437 | 0.99795925 | 0.2432 | 0 | 0 | 0 | 0 | 0 | 1 Ref |
| MN988554 | Unassigned | Unassigned | Unassigned | 468_0  | Clustered           | 4  | VC_468_0  | 4  | 0.143  | 0.99998478 | 0.143  | 0 | 0 | 0 | 0 | 0 | 1 Ref |
| MN988556 | Unassigned | Unassigned | Unassigned | 342_0  | Clustered           | 2  | VC_342_0  | 2  | 0.1817 | 0.93411407 | 0.1698 | 0 | 0 | 0 | 0 | 0 | 1 Ref |
| MN988557 | Unassigned | Unassigned | Unassigned | 970_0  | Clustered           | 9  | VC_970_0  | 9  | 0.9685 | 1          | 0.9685 | 0 | 0 | 0 | 0 | 0 | 1 Ref |
| MN988558 | Unassigned | Unassigned | Unassigned | 886_0  | Clustered           | 2  | VC_886_0  | 2  | 0.1375 | 0.95352335 | 0.1311 | 0 | 0 | 0 | 0 | 0 | 1 Ref |
| MN988559 | Unassigned | Unassigned | Unassigned | 1203_0 | Clustered           | 7  | VC_1203_0 | 7  | 0.6515 | 1          | 0.6515 | 0 | 0 | 0 | 0 | 0 | 1 Ref |
| MN988560 | Unassigned | Unassigned | Unassigned | 1203_1 | Clustered/Singleton | 1  | VC_1203_1 | 1  | 0      | 1          | 0      | 0 | 0 | 0 | 0 | 0 | 1 Ref |
| MN988561 | Unassigned | Unassigned | Unassigned | 1203_0 | Clustered           | 7  | VC_1203_0 | 7  | 0.6515 | 1          | 0.6515 | 0 | 0 | 0 | 0 | 0 | 1 Ref |
| MN994275 | Unassigned | Unassigned | Unassigned | 1224_0 | Clustered           | 19 | VC_1224_0 | 19 | 1      | 1          | 1      | 0 | 0 | 0 | 0 | 0 | 1 Ref |



|          |            |            |            |         |                     |              |     |        |            |        |   |   |   |        |     |
|----------|------------|------------|------------|---------|---------------------|--------------|-----|--------|------------|--------|---|---|---|--------|-----|
| MN994496 | Unassigned | Unassigned | Unassigned | 190_15  | Clustered           | 3 VC_190_15  | 3   | 0.0146 | 0.99759465 | 0.0145 | 0 | 0 | 0 | 0.6667 | Ref |
| MN994497 | Unassigned | Unassigned | Unassigned | 283_185 | Clustered/Singleton | 1 VC_283_185 | 1   | 0      | 1          | 0      | 0 | 0 | 0 | 1      | Ref |
| MN994498 | Unassigned | Unassigned | Unassigned | 329_10  | Clustered/Singleton | 1 VC_329_10  | 1   | 0      | 1          | 0      | 0 | 0 | 0 | 1      | Ref |
| MN994499 | Unassigned | Unassigned | Unassigned | 329_5   | Clustered/Singleton | 1 VC_329_5   | 1   | 0      | 1          | 0      | 0 | 0 | 0 | 1      | Ref |
| MN994500 | Unassigned | Unassigned | Unassigned | 584_0   | Clustered           | 28 VC_584_0  | 28  | 0.7704 | 0          | 0.7704 | 0 | 0 | 0 | 1      | Ref |
| MN994501 | Unassigned | Unassigned | Unassigned | 191_16  | Clustered           | 12 VC_191_16 | 12  | 0.0643 | 1          | 0.0643 | 0 | 0 | 0 | 0.9394 | Ref |
| MN994502 | Unassigned | Unassigned | Unassigned | 190_13  | Clustered           | 4 VC_190_13  | 4   | 0.0216 | 0.99997041 | 0.0216 | 0 | 0 | 0 | 0.6667 | Ref |
| MN994503 | Unassigned | Unassigned | Unassigned | 329_8   | Clustered           | 2 VC_329_8   | 2   | 0.0048 | 0.95654014 | 0.0046 | 0 | 0 | 0 | 1      | Ref |
| MN994504 | Unassigned | Unassigned | Unassigned | 190_3   | Clustered/Singleton | 1 VC_190_3   | 1   | 0      | 1          | 0      | 0 | 0 | 0 | 1      | Ref |
| MN996301 | Unassigned | Unassigned | Unassigned | 160_0   | Clustered           | 2 VC_160_0   | 2   | 0.4956 | 0.94363853 | 0.4677 | 0 | 0 | 0 | 1      | Ref |
| MPU46938 | Unassigned | Unassigned | Unassigned | 554_0   | Clustered           | 2 VC_554_0   | 2   | 0.2292 | 0.95193785 | 0.2181 | 0 | 0 | 0 | 1      | Ref |
| MT001829 | Unassigned | Unassigned | Unassigned | 164_0   | Clustered           | 3 VC_164_0   | 3   | 0.0298 | 0.82983726 | 0.0247 | 0 | 0 | 0 | 1      | Ref |
| MT002875 | Unassigned | Unassigned | Unassigned | 896_0   | Clustered           | 5 VC_896_0   | 5   | 0.4981 | 0.99999977 | 0.4981 | 0 | 0 | 0 | 1      | Ref |
| MT002975 | Unassigned | Unassigned | Unassigned | 879_0   | Clustered           | 36 VC_879_0  | 36  | 0.994  | 1          | 0.994  | 0 | 0 | 0 | 1      | Ref |
| MT004791 | Unassigned | Unassigned | Unassigned | 191_5   | Clustered           | 6 VC_191_5   | 6   | 0.0285 | 0.99999996 | 0.0285 | 0 | 0 | 0 | 1      | Ref |
| MT006214 | Unassigned | Unassigned | Unassigned | 673_0   | Clustered           | 15 VC_673_0  | 15  | 0.8234 | 1          | 0.8234 | 0 | 0 | 0 | 0.7619 | Ref |
| MT006233 | Unassigned | Unassigned | Unassigned | 745_0   | Clustered           | 4 VC_745_0   | 4   | 0.5585 | 0.99995802 | 0.5585 | 0 | 0 | 0 | 1      | Ref |
| MT006234 | Unassigned | Unassigned | Unassigned | 1418_0  | Clustered           | 2 VC_1418_0  | 2   | 1      | 1          | 1      | 0 | 0 | 0 | 1      | Ref |
| MT006235 | Unassigned | Unassigned | Unassigned | 1418_0  | Clustered           | 2 VC_1418_0  | 2   | 1      | 1          | 1      | 0 | 0 | 0 | 1      | Ref |
| MT006237 | Unassigned | Unassigned | Unassigned | 1198_0  | Clustered           | 3 VC_1198_0  | 3   | 0.2794 | 0.95148141 | 0.2658 | 0 | 0 | 0 | 1      | Ref |
| MT006238 | Unassigned | Unassigned | Unassigned | 745_0   | Clustered           | 4 VC_745_0   | 4   | 0.5585 | 0.99995802 | 0.5585 | 0 | 0 | 0 | 1      | Ref |
| MT006239 | Unassigned | Unassigned | Unassigned | 745_0   | Clustered           | 4 VC_745_0   | 4   | 0.5585 | 0.99995802 | 0.5585 | 0 | 0 | 0 | 1      | Ref |
| MT006240 | Unassigned | Unassigned | Unassigned | 745_0   | Clustered           | 4 VC_745_0   | 4   | 0.5585 | 0.99995802 | 0.5585 | 0 | 0 | 0 | 1      | Ref |
| MT012302 | Unassigned | Unassigned | Unassigned | 125_0   | Clustered           | 17 VC_125_0  | 17  | 0.9244 | 1          | 0.9244 | 0 | 0 | 0 | 1      | Ref |
| MT012729 | Unassigned | Unassigned | Unassigned | 540_0   | Clustered           | 15 VC_540_0  | 15  | 0.2866 | 1          | 0.2866 | 0 | 0 | 0 | 1      | Ref |
| MT012730 | Unassigned | Unassigned | Unassigned | 428_0   | Clustered           | 33 VC_428_0  | 33  | 0.9915 | 1          | 0.9915 | 0 | 0 | 0 | 1      | Ref |
| MT013111 | Unassigned | Unassigned | Unassigned | 9_0     | Clustered           | 38 VC_9_0    | 38  | 0.4895 | 1          | 0.4895 | 0 | 0 | 0 | 1      | Ref |
| MT023084 | Unassigned | Unassigned | Unassigned | 576_0   | Clustered           | 4 VC_576_0   | 4   | 0.0606 | 0.99998766 | 0.0606 | 0 | 0 | 0 | 1      | Ref |
| MT024860 | Unassigned | Unassigned | Unassigned | 1234_0  | Clustered           | 44 VC_1234_0 | 44  | 1      | 1          | 1      | 0 | 0 | 0 | 1      | Ref |
| MT024861 | Unassigned | Unassigned | Unassigned | 223_0   | Clustered           | 38 VC_223_0  | 38  | 0.9095 | 1          | 0.9095 | 0 | 0 | 0 | 1      | Ref |
| MT024863 | Unassigned | Unassigned | Unassigned | 1361_0  | Clustered           | 6 VC_1361_0  | 6   | 0.2371 | 1          | 0.2371 | 0 | 0 | 0 | 1      | Ref |
| MT024864 | Unassigned | Unassigned | Unassigned | 1240_0  | Clustered           | 82 VC_1240_0 | 82  | 0.7945 | 1          | 0.7945 | 0 | 0 | 0 | 1      | Ref |
| MT024865 | Unassigned | Unassigned | Unassigned | 1072_1  | Clustered           | 2 VC_1072_1  | 2   | 0.0259 | 0.95128042 | 0.0246 | 0 | 0 | 0 | 1      | Ref |
| MT024866 | Unassigned | Unassigned | Unassigned | 519_0   | Clustered           | 39 VC_519_0  | 39  | 0.8156 | 1          | 0.8156 | 0 | 0 | 0 | 1      | Ref |
| MT024867 | Unassigned | Unassigned | Unassigned | 1362_0  | Clustered           | 6 VC_1362_0  | 6   | 1      | 1          | 1      | 0 | 0 | 0 | 1      | Ref |
| MT024868 | Unassigned | Unassigned | Unassigned | 1073_0  | Clustered           | 24 VC_1073_0 | 24  | 0.8388 | 1          | 0.8388 | 0 | 0 | 0 | 1      | Ref |
| MT024869 | Unassigned | Unassigned | Unassigned | 1207_0  | Clustered           | 29 VC_1207_0 | 29  | 0.8225 | 1          | 0.8225 | 0 | 0 | 0 | 1      | Ref |
| MT024870 | Unassigned | Unassigned | Unassigned | 1362_0  | Clustered           | 6 VC_1362_0  | 6   | 1      | 1          | 1      | 0 | 0 | 0 | 1      | Ref |
| MT024871 | Unassigned | Unassigned | Unassigned | 1207_0  | Clustered           | 29 VC_1207_0 | 29  | 0.8225 | 1          | 0.8225 | 0 | 0 | 0 | 1      | Ref |
| MT024872 | Unassigned | Unassigned | Unassigned | 1072_1  | Clustered           | 2 VC_1072_1  | 2   | 0.0259 | 0.95128042 | 0.0246 | 0 | 0 | 0 | 1      | Ref |
| MT028297 | Unassigned | Unassigned | Unassigned | 812_1   | Clustered           | 4 VC_812_1   | 4   | 0.2266 | 0.99998426 | 0.2266 | 0 | 0 | 0 | 1      | Ref |
| MT047590 | Unassigned | Unassigned | Unassigned | 440_0   | Clustered           | 4 VC_440_0   | 4   | 1      | 1          | 1      | 0 | 0 | 0 | 1      | Ref |
| MT066160 | Unassigned | Unassigned | Unassigned | 754_0   | Clustered           | 8 VC_754_0   | 8   | 0.752  | 1          | 0.752  | 0 | 0 | 0 | 1      | Ref |
| MT074134 | Unassigned | Unassigned | Unassigned | 1007_0  | Clustered           | 19 VC_1007_0 | 19  | 0.86   | 1          | 0.86   | 0 | 0 | 0 | 1      | Ref |
| MT074135 | Unassigned | Unassigned | Unassigned | 1007_0  | Clustered           | 19 VC_1007_0 | 19  | 0.86   | 1          | 0.86   | 0 | 0 | 0 | 1      | Ref |
| MT074136 | Unassigned | Unassigned | Unassigned | 1018_1  | Clustered           | 10 VC_1018_1 | 10  | 0.7518 | 1          | 0.7518 | 0 | 0 | 0 | 0.8    | Ref |
| MT074137 | Unassigned | Unassigned | Unassigned | 1419_0  | Clustered           | 6 VC_1419_0  | 6   | 0.9543 | 0.99999304 | 0.9543 | 0 | 0 | 0 | 1      | Ref |
| MT074138 | Unassigned | Unassigned | Unassigned | 1018_1  | Clustered           | 10 VC_1018_1 | 10  | 0.7518 | 1          | 0.7518 | 0 | 0 | 0 | 0.8    | Ref |
| MT074139 | Unassigned | Unassigned | Unassigned | 1419_0  | Clustered           | 6 VC_1419_0  | 6   | 0.9543 | 0.99999304 | 0.9543 | 0 | 0 | 0 | 1      | Ref |
| MT074140 | Unassigned | Unassigned | Unassigned | 1419_0  | Clustered           | 6 VC_1419_0  | 6   | 0.9543 | 0.99999304 | 0.9543 | 0 | 0 | 0 | 1      | Ref |
| MT074141 | Unassigned | Unassigned | Unassigned | 1419_0  | Clustered           | 6 VC_1419_0  | 6   | 0.9543 | 0.99999304 | 0.9543 | 0 | 0 | 0 | 1      | Ref |
| MT074142 | Unassigned | Unassigned | Unassigned | 1419_0  | Clustered           | 6 VC_1419_0  | 6   | 0.9543 | 0.99999304 | 0.9543 | 0 | 0 | 0 | 1      | Ref |
| MT074143 | Unassigned | Unassigned | Unassigned | 1007_0  | Clustered           | 19 VC_1007_0 | 19  | 0.86   | 1          | 0.86   | 0 | 0 | 0 | 1      | Ref |
| MT074144 | Unassigned | Unassigned | Unassigned | 1007_0  | Clustered           | 19 VC_1007_0 | 19  | 0.86   | 1          | 0.86   | 0 | 0 | 0 | 1      | Ref |
| MT074145 | Unassigned | Unassigned | Unassigned | 1007_0  | Clustered           | 19 VC_1007_0 | 19  | 0.86   | 1          | 0.86   | 0 | 0 | 0 | 1      | Ref |
| MT074146 | Unassigned | Unassigned | Unassigned | 1419_0  | Clustered           | 6 VC_1419_0  | 6   | 0.9543 | 0.99999304 | 0.9543 | 0 | 0 | 0 | 1      | Ref |
| MT074147 | Unassigned | Unassigned | Unassigned | 1007_0  | Clustered           | 19 VC_1007_0 | 19  | 0.86   | 1          | 0.86   | 0 | 0 | 0 | 1      | Ref |
| MT074148 | Unassigned | Unassigned | Unassigned | 1007_0  | Clustered           | 19 VC_1007_0 | 19  | 0.86   | 1          | 0.86   | 0 | 0 | 0 | 1      | Ref |
| MT074149 | Unassigned | Unassigned | Unassigned | 1007_0  | Clustered           | 19 VC_1007_0 | 19  | 0.86   | 1          | 0.86   | 0 | 0 | 0 | 1      | Ref |
| MT074150 | Unassigned | Unassigned | Unassigned | 1007_0  | Clustered           | 19 VC_1007_0 | 19  | 0.86   | 1          | 0.86   | 0 | 0 | 0 | 1      | Ref |
| MT074151 | Unassigned | Unassigned | Unassigned | 1007_0  | Clustered           | 19 VC_1007_0 | 19  | 0.86   | 1          | 0.86   | 0 | 0 | 0 | 1      | Ref |
| MT074152 | Unassigned | Unassigned | Unassigned | 1007_0  | Clustered           | 19 VC_1007_0 | 19  | 0.86   | 1          | 0.86   | 0 | 0 | 0 | 1      | Ref |
| MT074153 | Unassigned | Unassigned | Unassigned | 1007_0  | Clustered           | 19 VC_1007_0 | 19  | 0.86   | 1          | 0.86   | 0 | 0 | 0 | 1      | Ref |
| MT074154 | Unassigned | Unassigned | Unassigned | 1007_0  | Clustered           | 19 VC_1007_0 | 19  | 0.86   | 1          | 0.86   | 0 | 0 | 0 | 1      | Ref |
| MT074155 | Unassigned | Unassigned | Unassigned | 1007_0  | Clustered           | 19 VC_1007_0 | 19  | 0.86   | 1          | 0.86   | 0 | 0 | 0 | 1      | Ref |
| MT074156 | Unassigned | Unassigned | Unassigned | 1007_0  | Clustered           | 19 VC_1007_0 | 19  | 0.86   | 1          | 0.86   | 0 | 0 | 0 | 1      | Ref |
| MT074157 | Unassigned | Unassigned | Unassigned | 1007_0  | Clustered           | 19 VC_1007_0 | 19  | 0.86   | 1          | 0.86   | 0 | 0 | 0 | 1      | Ref |
| MT074158 | Unassigned | Unassigned | Unassigned | 1007_0  | Clustered           | 19 VC_1007_0 | 19  | 0.86   | 1          | 0.86   | 0 | 0 | 0 | 1      | Ref |
| MT074159 | Unassigned | Unassigned | Unassigned | 1007_0  | Clustered           | 19 VC_1007_0 | 19  | 0.86   | 1          | 0.86   | 0 | 0 | 0 | 1      | Ref |
| MT074160 | Unassigned | Unassigned | Unassigned | 1007_0  | Clustered           | 19 VC_1007_0 | 19  | 0.86   | 1          | 0.86   | 0 | 0 | 0 | 1      | Ref |
| MT074429 | Unassigned | Unassigned | Unassigned | 1218_0  | Clustered           | 4 VC_1218_0  | 4   | 0.8905 | 0.99530591 | 0.8863 | 0 | 0 | 0 | 1      | Ref |
| MT074430 | Unassigned | Unassigned | Unassigned | 637_1   | Clustered           | 27 VC_637_1  | 27  | 0.2578 | 1          | 0.2578 | 0 | 0 | 0 | 0.9858 | Ref |
| MT074431 | Unassigned | Unassigned | Unassigned | 637_0   | Clustered           | 115 VC_637_0 | 115 | 0.731  | 1          | 0.731  | 0 | 0 | 0 | 0.8764 | Ref |
| MT074432 | Unassigned | Unassigned | Unassigned | 637_0   | Clustered           | 115 VC_637_0 | 115 | 0.731  | 1          | 0.731  | 0 | 0 | 0 | 0.8764 | Ref |
| MT074433 | Unassigned | Unassigned | Unassigned | 941_0   | Clustered           | 40 VC_941_0  | 40  | 0.6903 | 1          | 0.6903 | 0 | 0 | 0 | 1      | Ref |
| MT074434 | Unassigned | Unassigned | Unassigned | 428_0   | Clustered           | 33 VC_428_0  | 33  | 0.9915 | 1          | 0.9915 | 0 | 0 | 0 | 1      | Ref |
| MT074435 | Unassigned | Unassigned | Unassigned | 428_0   | Clustered           | 33 VC_428_0  | 33  | 0.9915 | 1          | 0.9915 | 0 | 0 | 0 | 1      | Ref |
| MT074436 | Unassigned | Unassigned | Unassigned | 428_0   | Clustered           | 33 VC_428_0  | 33  | 0.9915 | 1          | 0.9915 | 0 | 0 | 0 | 1      | Ref |
| MT074437 | Unassigned | Unassigned | Unassigned | 428_0   | Clustered           | 33 VC_428_0  | 33  | 0.9915 | 1          | 0.9915 | 0 | 0 | 0 | 1      | Ref |
| MT074438 | Unassigned | Unassigned | Unassigned | 428_0   | Clustered           | 33 VC_428_0  | 33  | 0.9915 | 1          | 0.9915 | 0 | 0 | 0 | 1      | Ref |
| MT074439 | Unassigned | Unassigned | Unassigned | 428_0   | Clustered           | 33 VC_428_0  | 33  | 0.9915 | 1          | 0.9915 | 0 | 0 | 0 | 1      | Ref |



|          |            |            |            |        |                     |              |     |        |            |        |   |   |   |            |
|----------|------------|------------|------------|--------|---------------------|--------------|-----|--------|------------|--------|---|---|---|------------|
| MT074440 | Unassigned | Unassigned | Unassigned | 1218_0 | Clustered           | 4 VC_1218_0  | 4   | 0.8905 | 0.99530591 | 0.8863 | 0 | 0 | 0 | 1 Ref      |
| MT074441 | Unassigned | Unassigned | Unassigned | 428_0  | Clustered           | 33 VC_428_0  | 33  | 0.9915 | 1          | 0.9915 | 0 | 0 | 0 | 1 Ref      |
| MT074442 | Unassigned | Unassigned | Unassigned | 428_0  | Clustered           | 33 VC_428_0  | 33  | 0.9915 | 1          | 0.9915 | 0 | 0 | 0 | 1 Ref      |
| MT074443 | Unassigned | Unassigned | Unassigned | 428_0  | Clustered           | 33 VC_428_0  | 33  | 0.9915 | 1          | 0.9915 | 0 | 0 | 0 | 1 Ref      |
| MT074444 | Unassigned | Unassigned | Unassigned | 428_0  | Clustered           | 33 VC_428_0  | 33  | 0.9915 | 1          | 0.9915 | 0 | 0 | 0 | 1 Ref      |
| MT074445 | Unassigned | Unassigned | Unassigned | 428_0  | Clustered           | 33 VC_428_0  | 33  | 0.9915 | 1          | 0.9915 | 0 | 0 | 0 | 1 Ref      |
| MT074446 | Unassigned | Unassigned | Unassigned | 428_0  | Clustered           | 33 VC_428_0  | 33  | 0.9915 | 1          | 0.9915 | 0 | 0 | 0 | 1 Ref      |
| MT074447 | Unassigned | Unassigned | Unassigned | 191_30 | Clustered           | 2 VC_191_30  | 2   | 0.0061 | 0.95531751 | 0.0058 | 0 | 0 | 0 | 1 Ref      |
| MT074448 | Unassigned | Unassigned | Unassigned | 190_7  | Clustered           | 7 VC_190_7   | 7   | 0.0476 | 1          | 0.0476 | 0 | 0 | 0 | 1 Ref      |
| MT074449 | Unassigned | Unassigned | Unassigned | 191_32 | Clustered           | 12 VC_191_32 | 12  | 0.0683 | 1          | 0.0683 | 0 | 0 | 0 | 0.7576 Ref |
| MT074450 | Unassigned | Unassigned | Unassigned | 191_16 | Clustered           | 12 VC_191_16 | 12  | 0.0643 | 1          | 0.0643 | 0 | 0 | 0 | 0.9394 Ref |
| MT074451 | Unassigned | Unassigned | Unassigned | 637_0  | Clustered           | 115 VC_637_0 | 115 | 0.731  | 1          | 0.731  | 0 | 0 | 0 | 0.8764 Ref |
| MT074452 | Unassigned | Unassigned | Unassigned | 191_5  | Clustered           | 6 VC_191_5   | 6   | 0.0285 | 0.99999996 | 0.0285 | 0 | 0 | 0 | 1 Ref      |
| MT074453 | Unassigned | Unassigned | Unassigned | 191_3  | Clustered           | 5 VC_191_3   | 5   | 0.0231 | 0.99999849 | 0.0231 | 0 | 0 | 0 | 0.8 Ref    |
| MT074454 | Unassigned | Unassigned | Unassigned | 191_8  | Clustered           | 2 VC_191_8   | 2   | 0.0055 | 0.91831352 | 0.0051 | 0 | 0 | 0 | 1 Ref      |
| MT074455 | Unassigned | Unassigned | Unassigned | 191_4  | Clustered           | 2 VC_191_4   | 2   | 0.0055 | 0.88936514 | 0.0049 | 0 | 0 | 0 | 1 Ref      |
| MT074456 | Unassigned | Unassigned | Unassigned | 191_5  | Clustered           | 6 VC_191_5   | 6   | 0.0285 | 0.99999996 | 0.0285 | 0 | 0 | 0 | 1 Ref      |
| MT074457 | Unassigned | Unassigned | Unassigned | 191_3  | Clustered           | 5 VC_191_3   | 5   | 0.0231 | 0.99999849 | 0.0231 | 0 | 0 | 0 | 0.8 Ref    |
| MT074458 | Unassigned | Unassigned | Unassigned | 191_16 | Clustered           | 12 VC_191_16 | 12  | 0.0643 | 1          | 0.0643 | 0 | 0 | 0 | 0.9394 Ref |
| MT074459 | Unassigned | Unassigned | Unassigned | 191_9  | Clustered           | 5 VC_191_9   | 5   | 0.0228 | 0.99999662 | 0.0228 | 0 | 0 | 0 | 0.7 Ref    |
| MT074460 | Unassigned | Unassigned | Unassigned | 191_5  | Clustered           | 6 VC_191_5   | 6   | 0.0285 | 0.99999996 | 0.0285 | 0 | 0 | 0 | 1 Ref      |
| MT074461 | Unassigned | Unassigned | Unassigned | 191_30 | Clustered           | 2 VC_191_30  | 2   | 0.0061 | 0.95531751 | 0.0058 | 0 | 0 | 0 | 1 Ref      |
| MT074462 | Unassigned | Unassigned | Unassigned | 637_0  | Clustered           | 115 VC_637_0 | 115 | 0.731  | 1          | 0.731  | 0 | 0 | 0 | 0.8764 Ref |
| MT074463 | Unassigned | Unassigned | Unassigned | 191_5  | Clustered           | 6 VC_191_5   | 6   | 0.0285 | 0.99999996 | 0.0285 | 0 | 0 | 0 | 1 Ref      |
| MT074464 | Unassigned | Unassigned | Unassigned | 191_12 | Clustered/Singleton | 1 VC_191_12  | 1   | 0      | 1          | 0      | 0 | 0 | 0 | 1 Ref      |
| MT074465 | Unassigned | Unassigned | Unassigned | 191_32 | Clustered           | 12 VC_191_32 | 12  | 0.0683 | 1          | 0.0683 | 0 | 0 | 0 | 0.7576 Ref |
| MT074466 | Unassigned | Unassigned | Unassigned | 191_9  | Clustered           | 5 VC_191_9   | 5   | 0.0228 | 0.99999662 | 0.0228 | 0 | 0 | 0 | 0.7 Ref    |
| MT074467 | Unassigned | Unassigned | Unassigned | 191_7  | Clustered/Singleton | 1 VC_191_7   | 1   | 0      | 1          | 0      | 0 | 0 | 0 | 1 Ref      |
| MT074468 | Unassigned | Unassigned | Unassigned | 191_6  | Clustered/Singleton | 1 VC_191_6   | 1   | 0      | 1          | 0      | 0 | 0 | 0 | 1 Ref      |
| MT074469 | Unassigned | Unassigned | Unassigned | 133_3  | Clustered           | 3 VC_133_3   | 3   | 0.0105 | 0.99119575 | 0.0104 | 0 | 0 | 0 | 1 Ref      |
| MT074470 | Unassigned | Unassigned | Unassigned | 133_23 | Clustered/Singleton | 1 VC_133_23  | 1   | 0      | 1          | 0      | 0 | 0 | 0 | 1 Ref      |
| MT074471 | Unassigned | Unassigned | Unassigned | 133_45 | Clustered           | 2 VC_133_45  | 2   | 0.0052 | 0.9489868  | 0.0049 | 0 | 0 | 0 | 1 Ref      |
| MT074472 | Unassigned | Unassigned | Unassigned | 133_2  | Clustered/Singleton | 1 VC_133_2   | 1   | 0      | 1          | 0      | 0 | 0 | 0 | 1 Ref      |
| MT074473 | Unassigned | Unassigned | Unassigned | 637_0  | Clustered           | 115 VC_637_0 | 115 | 0.731  | 1          | 0.731  | 0 | 0 | 0 | 0.8764 Ref |
| MT074474 | Unassigned | Unassigned | Unassigned | 133_41 | Clustered/Singleton | 1 VC_133_41  | 1   | 0      | 1          | 0      | 0 | 0 | 0 | 1 Ref      |
| MT074475 | Unassigned | Unassigned | Unassigned | 133_19 | Clustered           | 2 VC_133_19  | 2   | 0.0051 | 0.8696643  | 0.0044 | 0 | 0 | 0 | 1 Ref      |
| MT074476 | Unassigned | Unassigned | Unassigned | 133_31 | Clustered           | 6 VC_133_31  | 6   | 0.0263 | 0.99999694 | 0.0263 | 0 | 0 | 0 | 1 Ref      |
| MT074477 | Unassigned | Unassigned | Unassigned | 133_8  | Clustered/Singleton | 1 VC_133_8   | 1   | 0      | 1          | 0      | 0 | 0 | 0 | 1 Ref      |
| MT074478 | Unassigned | Unassigned | Unassigned | 133_39 | Clustered/Singleton | 1 VC_133_39  | 1   | 0      | 1          | 0      | 0 | 0 | 0 | 1 Ref      |
| MT074479 | Unassigned | Unassigned | Unassigned | 133_47 | Clustered/Singleton | 1 VC_133_47  | 1   | 0      | 1          | 0      | 0 | 0 | 0 | 1 Ref      |
| MT074480 | Unassigned | Unassigned | Unassigned | 133_45 | Clustered           | 2 VC_133_45  | 2   | 0.0052 | 0.9489868  | 0.0049 | 0 | 0 | 0 | 1 Ref      |
| MT074481 | Unassigned | Unassigned | Unassigned | 637_0  | Clustered           | 115 VC_637_0 | 115 | 0.731  | 1          | 0.731  | 0 | 0 | 0 | 0.8764 Ref |
| MT074482 | Unassigned | Unassigned | Unassigned | 637_0  | Clustered           | 115 VC_637_0 | 115 | 0.731  | 1          | 0.731  | 0 | 0 | 0 | 0.8764 Ref |
| MT074483 | Unassigned | Unassigned | Unassigned | 637_0  | Clustered           | 115 VC_637_0 | 115 | 0.731  | 1          | 0.731  | 0 | 0 | 0 | 0.8764 Ref |
| MT074484 | Unassigned | Unassigned | Unassigned | 637_0  | Clustered           | 115 VC_637_0 | 115 | 0.731  | 1          | 0.731  | 0 | 0 | 0 | 0.8764 Ref |
| MT075871 | Unassigned | Unassigned | Unassigned | 836_0  | Clustered           | 9 VC_836_0   | 9   | 0.7733 | 1          | 0.7733 | 0 | 0 | 0 | 1 Ref      |
| MT078988 | Unassigned | Unassigned | Unassigned | 131_2  | Clustered           | 7 VC_131_2   | 7   | 0.0685 | 1          | 0.0685 | 0 | 0 | 0 | 0.9048 Ref |
| MT080102 | Unassigned | Unassigned | Unassigned | 838_0  | Clustered           | 29 VC_838_0  | 29  | 0.8611 | 1          | 0.8611 | 0 | 0 | 0 | 1 Ref      |
| MT080103 | Unassigned | Unassigned | Unassigned | 190_29 | Clustered/Singleton | 1 VC_190_29  | 1   | 0      | 1          | 0      | 0 | 0 | 0 | 1 Ref      |
| MT080582 | Unassigned | Unassigned | Unassigned | 149_11 | Clustered           | 4 VC_149_11  | 4   | 0.0203 | 0.9998357  | 0.0203 | 0 | 0 | 0 | 1 Ref      |
| MT080583 | Unassigned | Unassigned | Unassigned | 149_11 | Clustered           | 4 VC_149_11  | 4   | 0.0203 | 0.9998357  | 0.0203 | 0 | 0 | 0 | 1 Ref      |
| MT080584 | Unassigned | Unassigned | Unassigned | 153_0  | Clustered           | 25 VC_153_0  | 25  | 0.7729 | 1          | 0.7729 | 0 | 0 | 0 | 1 Ref      |
| MT080585 | Unassigned | Unassigned | Unassigned | 149_17 | Clustered           | 4 VC_149_17  | 4   | 0.013  | 0.99951815 | 0.013  | 0 | 0 | 0 | 1 Ref      |
| MT080586 | Unassigned | Unassigned | Unassigned | 149_11 | Clustered           | 4 VC_149_11  | 4   | 0.0203 | 0.9998357  | 0.0203 | 0 | 0 | 0 | 1 Ref      |
| MT080587 | Unassigned | Unassigned | Unassigned | 153_0  | Clustered           | 25 VC_153_0  | 25  | 0.7729 | 1          | 0.7729 | 0 | 0 | 0 | 1 Ref      |
| MT080588 | Unassigned | Unassigned | Unassigned | 153_0  | Clustered           | 25 VC_153_0  | 25  | 0.7729 | 1          | 0.7729 | 0 | 0 | 0 | 1 Ref      |
| MT080589 | Unassigned | Unassigned | Unassigned | 149_17 | Clustered           | 4 VC_149_17  | 4   | 0.013  | 0.99951815 | 0.013  | 0 | 0 | 0 | 1 Ref      |
| MT080590 | Unassigned | Unassigned | Unassigned | 153_0  | Clustered           | 25 VC_153_0  | 25  | 0.7729 | 1          | 0.7729 | 0 | 0 | 0 | 1 Ref      |
| MT080591 | Unassigned | Unassigned | Unassigned | 149_17 | Clustered           | 4 VC_149_17  | 4   | 0.013  | 0.99951815 | 0.013  | 0 | 0 | 0 | 1 Ref      |
| MT080592 | Unassigned | Unassigned | Unassigned | 149_0  | Clustered           | 5 VC_149_0   | 5   | 0.0281 | 0.99999897 | 0.0281 | 0 | 0 | 0 | 1 Ref      |
| MT080593 | Unassigned | Unassigned | Unassigned | 149_22 | Clustered           | 2 VC_149_22  | 2   | 0.0062 | 0.92916562 | 0.0058 | 0 | 0 | 0 | 1 Ref      |
| MT080594 | Unassigned | Unassigned | Unassigned | 149_11 | Clustered           | 4 VC_149_11  | 4   | 0.0203 | 0.9998357  | 0.0203 | 0 | 0 | 0 | 1 Ref      |
| MT080595 | Unassigned | Unassigned | Unassigned | 153_0  | Clustered           | 25 VC_153_0  | 25  | 0.7729 | 1          | 0.7729 | 0 | 0 | 0 | 1 Ref      |
| MT080596 | Unassigned | Unassigned | Unassigned | 149_22 | Clustered           | 2 VC_149_22  | 2   | 0.0062 | 0.92916562 | 0.0058 | 0 | 0 | 0 | 1 Ref      |
| MT080597 | Unassigned | Unassigned | Unassigned | 149_0  | Clustered           | 5 VC_149_0   | 5   | 0.0281 | 0.99999897 | 0.0281 | 0 | 0 | 0 | 1 Ref      |
| MT080598 | Unassigned | Unassigned | Unassigned | 149_0  | Clustered           | 5 VC_149_0   | 5   | 0.0281 | 0.99999897 | 0.0281 | 0 | 0 | 0 | 1 Ref      |
| MT080599 | Unassigned | Unassigned | Unassigned | 149_0  | Clustered           | 5 VC_149_0   | 5   | 0.0281 | 0.99999897 | 0.0281 | 0 | 0 | 0 | 1 Ref      |
| MT080600 | Unassigned | Unassigned | Unassigned | 149_8  | Clustered           | 66 VC_149_8  | 66  | 0.4565 | 1          | 0.4565 | 0 | 0 | 0 | 0.8182 Ref |
| MT080601 | Unassigned | Unassigned | Unassigned | 149_17 | Clustered           | 4 VC_149_17  | 4   | 0.013  | 0.99951815 | 0.013  | 0 | 0 | 0 | 1 Ref      |
| MT080602 | Unassigned | Unassigned | Unassigned | 149_8  | Clustered           | 66 VC_149_8  | 66  | 0.4565 | 1          | 0.4565 | 0 | 0 | 0 | 0.8182 Ref |
| MT080603 | Unassigned | Unassigned | Unassigned | 149_0  | Clustered           | 5 VC_149_0   | 5   | 0.0281 | 0.99999897 | 0.0281 | 0 | 0 | 0 | 1 Ref      |
| MT084350 | Unassigned | Unassigned | Unassigned | 280_0  | Clustered           | 2 VC_280_0   | 2   | 0.34   | 0.95158328 | 0.3235 | 0 | 0 | 0 | 1 Ref      |
| MT090077 | Unassigned | Unassigned | Unassigned | 111_0  | Clustered           | 91 VC_111_0  | 91  | 0.9587 | 1          | 0.9587 | 0 | 0 | 0 | 1 Ref      |
| MT094431 | Unassigned | Unassigned | Unassigned | 130_0  | Clustered           | 19 VC_130_0  | 19  | 0.6068 | 1          | 0.6068 | 0 | 0 | 0 | 1 Ref      |
| MT104465 | Unassigned | Unassigned | Unassigned | 129_0  | Clustered           | 43 VC_129_0  | 43  | 0.886  | 1          | 0.886  | 0 | 0 | 0 | 1 Ref      |
| MT104466 | Unassigned | Unassigned | Unassigned | 129_0  | Clustered           | 43 VC_129_0  | 43  | 0.886  | 1          | 0.886  | 0 | 0 | 0 | 1 Ref      |
| MT104468 | Unassigned | Unassigned | Unassigned | 155_0  | Clustered           | 14 VC_155_0  | 14  | 0.6095 | 1          | 0.6095 | 0 | 0 | 0 | 1 Ref      |
| MT104469 | Unassigned | Unassigned | Unassigned | 155_0  | Clustered           | 14 VC_155_0  | 14  | 0.6095 | 1          | 0.6095 | 0 | 0 | 0 | 1 Ref      |
| MT104470 | Unassigned | Unassigned | Unassigned | 155_0  | Clustered           | 14 VC_155_0  | 14  | 0.6095 | 1          | 0.6095 | 0 | 0 | 0 | 1 Ref      |
| MT104471 | Unassigned | Unassigned | Unassigned | 155_0  | Clustered           | 14 VC_155_0  | 14  | 0.6095 | 1          | 0.6095 | 0 | 0 | 0 | 1 Ref      |
| MT104472 | Unassigned | Unassigned | Unassigned | 155_0  | Clustered           | 14 VC_155_0  | 14  | 0.6095 | 1          | 0.6095 | 0 | 0 | 0 | 1 Ref      |



|          |            |            |            |        |                     |              |     |        |            |        |   |   |   |            |
|----------|------------|------------|------------|--------|---------------------|--------------|-----|--------|------------|--------|---|---|---|------------|
| MT104473 | Unassigned | Unassigned | Unassigned | 697_0  | Clustered           | 5 VC_697_0   | 5   | 0.8303 | 0.99999971 | 0.8303 | 0 | 0 | 0 | 1 Ref      |
| MT104475 | Unassigned | Unassigned | Unassigned | 697_0  | Clustered           | 5 VC_697_0   | 5   | 0.8303 | 0.99999971 | 0.8303 | 0 | 0 | 0 | 1 Ref      |
| MT104476 | Unassigned | Unassigned | Unassigned | 155_0  | Clustered           | 14 VC_155_0  | 14  | 0.6095 | 1          | 0.6095 | 0 | 0 | 0 | 1 Ref      |
| MT104477 | Unassigned | Unassigned | Unassigned | 155_0  | Clustered           | 14 VC_155_0  | 14  | 0.6095 | 1          | 0.6095 | 0 | 0 | 0 | 1 Ref      |
| MT108723 | Unassigned | Unassigned | Unassigned | 472_0  | Clustered           | 47 VC_472_0  | 47  | 0.9025 | 1          | 0.9025 | 0 | 0 | 0 | 1 Ref      |
| MT108724 | Unassigned | Unassigned | Unassigned | 472_0  | Clustered           | 47 VC_472_0  | 47  | 0.9025 | 1          | 0.9025 | 0 | 0 | 0 | 1 Ref      |
| MT108725 | Unassigned | Unassigned | Unassigned | 464_0  | Clustered           | 8 VC_464_0   | 8   | 0.2629 | 1          | 0.2629 | 0 | 0 | 0 | 1 Ref      |
| MT108726 | Unassigned | Unassigned | Unassigned | 80_0   | Clustered           | 41 VC_80_0   | 41  | 0.5837 | 1          | 0.5837 | 0 | 0 | 0 | 0.9805 Ref |
| MT108727 | Unassigned | Unassigned | Unassigned | 79_7   | Clustered           | 33 VC_79_7   | 33  | 0.216  | 1          | 0.216  | 0 | 0 | 0 | 0.8409 Ref |
| MT108728 | Unassigned | Unassigned | Unassigned | 77_0   | Clustered           | 20 VC_77_0   | 20  | 0.9657 | 1          | 0.9657 | 0 | 0 | 0 | 1 Ref      |
| MT108729 | Unassigned | Unassigned | Unassigned | 79_6   | Clustered           | 11 VC_79_6   | 11  | 0.0528 | 1          | 0.0528 | 0 | 0 | 0 | 0.7455 Ref |
| MT108730 | Unassigned | Unassigned | Unassigned | 77_0   | Clustered           | 20 VC_77_0   | 20  | 0.9657 | 1          | 0.9657 | 0 | 0 | 0 | 1 Ref      |
| MT108731 | Unassigned | Unassigned | Unassigned | 464_0  | Clustered           | 8 VC_464_0   | 8   | 0.2629 | 1          | 0.2629 | 0 | 0 | 0 | 1 Ref      |
| MT110073 | Unassigned | Unassigned | Unassigned | 905_0  | Clustered           | 3 VC_905_0   | 3   | 0.3424 | 0.99823775 | 0.3417 | 0 | 0 | 0 | 1 Ref      |
| MT114158 | Unassigned | Unassigned | Unassigned | 517_1  | Clustered           | 108 VC_517_1 | 108 | 0.8483 | 1          | 0.8483 | 0 | 0 | 0 | 0.9955 Ref |
| MT114159 | Unassigned | Unassigned | Unassigned | 810_0  | Clustered           | 18 VC_810_0  | 18  | 0.9121 | 1          | 0.9121 | 0 | 0 | 0 | 1 Ref      |
| MT114160 | Unassigned | Unassigned | Unassigned | 868_0  | Clustered           | 25 VC_868_0  | 25  | 0.5791 | 1          | 0.5791 | 0 | 0 | 0 | 1 Ref      |
| MT114161 | Unassigned | Unassigned | Unassigned | 1073_0 | Clustered           | 24 VC_1073_0 | 24  | 0.8388 | 1          | 0.8388 | 0 | 0 | 0 | 1 Ref      |
| MT114162 | Unassigned | Unassigned | Unassigned | 1072_3 | Clustered           | 6 VC_1072_3  | 6   | 0.1304 | 0.99999994 | 0.1304 | 0 | 0 | 0 | 0.8667 Ref |
| MT114164 | Unassigned | Unassigned | Unassigned | 520_76 | Clustered           | 2 VC_520_76  | 2   | 0.0092 | 0.95761376 | 0.0088 | 0 | 0 | 0 | 1 Ref      |
| MT114165 | Unassigned | Unassigned | Unassigned | 551_2  | Clustered           | 17 VC_551_2  | 17  | 0.0973 | 1          | 0.0973 | 0 | 0 | 0 | 0.9779 Ref |
| MT114166 | Unassigned | Unassigned | Unassigned | 1171_0 | Clustered           | 21 VC_1171_0 | 21  | 0.7125 | 1          | 0.7125 | 0 | 0 | 0 | 1 Ref      |
| MT114167 | Unassigned | Unassigned | Unassigned | 520_28 | Clustered           | 2 VC_520_28  | 2   | 0.0137 | 0.95761531 | 0.0131 | 0 | 0 | 0 | 1 Ref      |
| MT118288 | Unassigned | Unassigned | Unassigned | 472_0  | Clustered           | 47 VC_472_0  | 47  | 0.9025 | 1          | 0.9025 | 0 | 0 | 0 | 1 Ref      |
| MT118289 | Unassigned | Unassigned | Unassigned | 79_4   | Clustered           | 3 VC_79_4    | 3   | 0.0106 | 0.99632092 | 0.0105 | 0 | 0 | 0 | 0.6667 Ref |
| MT118290 | Unassigned | Unassigned | Unassigned | 79_7   | Clustered           | 33 VC_79_7   | 33  | 0.216  | 1          | 0.216  | 0 | 0 | 0 | 0.8409 Ref |
| MT118291 | Unassigned | Unassigned | Unassigned | 79_0   | Clustered           | 64 VC_79_0   | 64  | 0.4185 | 1          | 0.4185 | 0 | 0 | 0 | 0.7649 Ref |
| MT118292 | Unassigned | Unassigned | Unassigned | 79_4   | Clustered           | 3 VC_79_4    | 3   | 0.0106 | 0.99632092 | 0.0105 | 0 | 0 | 0 | 0.6667 Ref |
| MT118293 | Unassigned | Unassigned | Unassigned | 80_0   | Clustered           | 41 VC_80_0   | 41  | 0.5837 | 1          | 0.5837 | 0 | 0 | 0 | 0.9805 Ref |
| MT118294 | Unassigned | Unassigned | Unassigned | 77_0   | Clustered           | 20 VC_77_0   | 20  | 0.9657 | 1          | 0.9657 | 0 | 0 | 0 | 1 Ref      |
| MT118295 | Unassigned | Unassigned | Unassigned | 77_0   | Clustered           | 20 VC_77_0   | 20  | 0.9657 | 1          | 0.9657 | 0 | 0 | 0 | 1 Ref      |
| MT118297 | Unassigned | Unassigned | Unassigned | 79_0   | Clustered           | 64 VC_79_0   | 64  | 0.4185 | 1          | 0.4185 | 0 | 0 | 0 | 0.7649 Ref |
| MT118298 | Unassigned | Unassigned | Unassigned | 79_0   | Clustered           | 64 VC_79_0   | 64  | 0.4185 | 1          | 0.4185 | 0 | 0 | 0 | 0.7649 Ref |
| MT118299 | Unassigned | Unassigned | Unassigned | 79_0   | Clustered           | 64 VC_79_0   | 64  | 0.4185 | 1          | 0.4185 | 0 | 0 | 0 | 0.7649 Ref |
| MT118300 | Unassigned | Unassigned | Unassigned | 77_0   | Clustered           | 20 VC_77_0   | 20  | 0.9657 | 1          | 0.9657 | 0 | 0 | 0 | 1 Ref      |
| MT118301 | Unassigned | Unassigned | Unassigned | 630_0  | Clustered           | 20 VC_630_0  | 20  | 0.8513 | 1          | 0.8513 | 0 | 0 | 0 | 1 Ref      |
| MT118302 | Unassigned | Unassigned | Unassigned | 166_0  | Clustered           | 26 VC_166_0  | 26  | 0.7923 | 1          | 0.7923 | 0 | 0 | 0 | 1 Ref      |
| MT118303 | Unassigned | Unassigned | Unassigned | 80_0   | Clustered           | 41 VC_80_0   | 41  | 0.5837 | 1          | 0.5837 | 0 | 0 | 0 | 0.9805 Ref |
| MT118304 | Unassigned | Unassigned | Unassigned | 749_0  | Clustered           | 40 VC_749_0  | 40  | 0.7517 | 1          | 0.7517 | 0 | 0 | 0 | 1 Ref      |
| MT118305 | Unassigned | Unassigned | Unassigned | 749_0  | Clustered           | 40 VC_749_0  | 40  | 0.7517 | 1          | 0.7517 | 0 | 0 | 0 | 1 Ref      |
| MT119359 | Unassigned | Unassigned | Unassigned | 695_0  | Clustered           | 48 VC_695_0  | 48  | 0.8162 | 1          | 0.8162 | 0 | 0 | 0 | 1 Ref      |
| MT119360 | Unassigned | Unassigned | Unassigned | 691_1  | Clustered           | 5 VC_691_1   | 5   | 0.4358 | 0.99999993 | 0.4358 | 0 | 0 | 0 | 1 Ref      |
| MT119361 | Unassigned | Unassigned | Unassigned | 691_1  | Clustered           | 5 VC_691_1   | 5   | 0.4358 | 0.99999993 | 0.4358 | 0 | 0 | 0 | 1 Ref      |
| MT119362 | Unassigned | Unassigned | Unassigned | 472_0  | Clustered           | 47 VC_472_0  | 47  | 0.9025 | 1          | 0.9025 | 0 | 0 | 0 | 1 Ref      |
| MT119363 | Unassigned | Unassigned | Unassigned | 79_0   | Clustered           | 64 VC_79_0   | 64  | 0.4185 | 1          | 0.4185 | 0 | 0 | 0 | 0.7649 Ref |
| MT119364 | Unassigned | Unassigned | Unassigned | 80_0   | Clustered           | 41 VC_80_0   | 41  | 0.5837 | 1          | 0.5837 | 0 | 0 | 0 | 0.9805 Ref |
| MT119365 | Unassigned | Unassigned | Unassigned | 79_0   | Clustered           | 64 VC_79_0   | 64  | 0.4185 | 1          | 0.4185 | 0 | 0 | 0 | 0.7649 Ref |
| MT119366 | Unassigned | Unassigned | Unassigned | 79_7   | Clustered           | 33 VC_79_7   | 33  | 0.216  | 1          | 0.216  | 0 | 0 | 0 | 0.8409 Ref |
| MT119367 | Unassigned | Unassigned | Unassigned | 80_0   | Clustered           | 41 VC_80_0   | 41  | 0.5837 | 1          | 0.5837 | 0 | 0 | 0 | 0.9805 Ref |
| MT119368 | Unassigned | Unassigned | Unassigned | 79_0   | Clustered           | 64 VC_79_0   | 64  | 0.4185 | 1          | 0.4185 | 0 | 0 | 0 | 0.7649 Ref |
| MT119369 | Unassigned | Unassigned | Unassigned | 79_7   | Clustered           | 33 VC_79_7   | 33  | 0.216  | 1          | 0.216  | 0 | 0 | 0 | 0.8409 Ref |
| MT119370 | Unassigned | Unassigned | Unassigned | 80_0   | Clustered           | 41 VC_80_0   | 41  | 0.5837 | 1          | 0.5837 | 0 | 0 | 0 | 0.9805 Ref |
| MT119371 | Unassigned | Unassigned | Unassigned | 472_0  | Clustered           | 47 VC_472_0  | 47  | 0.9025 | 1          | 0.9025 | 0 | 0 | 0 | 1 Ref      |
| MT119372 | Unassigned | Unassigned | Unassigned | 80_0   | Clustered           | 41 VC_80_0   | 41  | 0.5837 | 1          | 0.5837 | 0 | 0 | 0 | 0.9805 Ref |
| MT119373 | Unassigned | Unassigned | Unassigned | 472_0  | Clustered           | 47 VC_472_0  | 47  | 0.9025 | 1          | 0.9025 | 0 | 0 | 0 | 1 Ref      |
| MT119374 | Unassigned | Unassigned | Unassigned | 80_0   | Clustered           | 41 VC_80_0   | 41  | 0.5837 | 1          | 0.5837 | 0 | 0 | 0 | 0.9805 Ref |
| MT119375 | Unassigned | Unassigned | Unassigned | 80_0   | Clustered           | 41 VC_80_0   | 41  | 0.5837 | 1          | 0.5837 | 0 | 0 | 0 | 0.9805 Ref |
| MT119376 | Unassigned | Unassigned | Unassigned | 79_0   | Clustered           | 64 VC_79_0   | 64  | 0.4185 | 1          | 0.4185 | 0 | 0 | 0 | 0.7649 Ref |
| MT119377 | Unassigned | Unassigned | Unassigned | 80_0   | Clustered           | 41 VC_80_0   | 41  | 0.5837 | 1          | 0.5837 | 0 | 0 | 0 | 0.9805 Ref |
| MT119378 | Unassigned | Unassigned | Unassigned | 80_0   | Clustered           | 41 VC_80_0   | 41  | 0.5837 | 1          | 0.5837 | 0 | 0 | 0 | 0.9805 Ref |
| MT119766 | Unassigned | Unassigned | Unassigned | 934_0  | Clustered           | 2 VC_934_0   | 2   | 0.8613 | 0.92499224 | 0.7967 | 0 | 0 | 0 | 1 Ref      |
| MT121960 | Unassigned | Unassigned | Unassigned | 1420_0 | Clustered           | 5 VC_1420_0  | 5   | 1      | 1          | 1      | 0 | 0 | 0 | 1 Ref      |
| MT121964 | Unassigned | Unassigned | Unassigned | 1420_0 | Clustered           | 5 VC_1420_0  | 5   | 1      | 1          | 1      | 0 | 0 | 0 | 1 Ref      |
| MT121966 | Unassigned | Unassigned | Unassigned | 241_0  | Clustered           | 2 VC_241_0   | 2   | 0.072  | 0.95433582 | 0.0687 | 0 | 0 | 0 | 1 Ref      |
| MT121967 | Unassigned | Unassigned | Unassigned | 355_0  | Clustered           | 2 VC_355_0   | 2   | 0.0513 | 0.93418388 | 0.0479 | 0 | 0 | 0 | 1 Ref      |
| MT127619 | Unassigned | Unassigned | Unassigned | 941_0  | Clustered           | 40 VC_941_0  | 40  | 0.6903 | 1          | 0.6903 | 0 | 0 | 0 | 1 Ref      |
| MT127620 | Unassigned | Unassigned | Unassigned | 813_1  | Clustered           | 24 VC_813_1  | 24  | 0.535  | 1          | 0.535  | 0 | 0 | 0 | 1 Ref      |
| MT129652 | Unassigned | Unassigned | Unassigned | 290_0  | Clustered           | 10 VC_290_0  | 10  | 0.0981 | 1          | 0.0981 | 0 | 0 | 0 | 1 Ref      |
| MT129653 | Unassigned | Unassigned | Unassigned | 813_1  | Clustered           | 24 VC_813_1  | 24  | 0.535  | 1          | 0.535  | 0 | 0 | 0 | 1 Ref      |
| MT129654 | Unassigned | Unassigned | Unassigned | 290_6  | Clustered           | 12 VC_290_6  | 12  | 0.1149 | 1          | 0.1149 | 0 | 0 | 0 | 0.8182 Ref |
| MT129655 | Unassigned | Unassigned | Unassigned | 813_1  | Clustered           | 24 VC_813_1  | 24  | 0.535  | 1          | 0.535  | 0 | 0 | 0 | 1 Ref      |
| MT133560 | Unassigned | Unassigned | Unassigned | 344_0  | Clustered           | 21 VC_344_0  | 21  | 0.5436 | 1          | 0.5436 | 0 | 0 | 0 | 1 Ref      |
| MT133561 | Unassigned | Unassigned | Unassigned | 79_0   | Clustered           | 64 VC_79_0   | 64  | 0.4185 | 1          | 0.4185 | 0 | 0 | 0 | 0.7649 Ref |
| MT133562 | Unassigned | Unassigned | Unassigned | 79_0   | Clustered           | 64 VC_79_0   | 64  | 0.4185 | 1          | 0.4185 | 0 | 0 | 0 | 0.7649 Ref |
| MT133563 | Unassigned | Unassigned | Unassigned | 80_0   | Clustered           | 41 VC_80_0   | 41  | 0.5837 | 1          | 0.5837 | 0 | 0 | 0 | 0.9805 Ref |
| MT135024 | Unassigned | Unassigned | Unassigned | 531_6  | Clustered/Singleton | 1 VC_531_6   | 1   | 0      | 1          | 0      | 0 | 0 | 0 | 1 Ref      |
| MT135025 | Unassigned | Unassigned | Unassigned | 531_5  | Clustered/Singleton | 1 VC_531_5   | 1   | 0      | 1          | 0      | 0 | 0 | 0 | 1 Ref      |
| MT135026 | Unassigned | Unassigned | Unassigned | 531_1  | Clustered           | 6 VC_531_1   | 6   | 0.1481 | 0.99978665 | 0.148  | 0 | 0 | 0 | 1 Ref      |
| MT135176 | Unassigned | Unassigned | Unassigned | 242_1  | Clustered           | 20 VC_242_1  | 20  | 0.684  | 1          | 0.684  | 0 | 0 | 0 | 0.8368 Ref |
| MT135255 | Unassigned | Unassigned | Unassigned | 1149_0 | Clustered           | 5 VC_1149_0  | 5   | 0.4768 | 0.99999998 | 0.4768 | 0 | 0 | 0 | 1 Ref      |
| MT135256 | Unassigned | Unassigned | Unassigned | 1117_0 | Clustered           | 5 VC_1117_0  | 5   | 0.4688 | 0.99999974 | 0.4688 | 0 | 0 | 0 | 1 Ref      |



|          |            |            |            |        |           |               |     |        |            |        |   |   |   |       |
|----------|------------|------------|------------|--------|-----------|---------------|-----|--------|------------|--------|---|---|---|-------|
| MTI35257 | Unassigned | Unassigned | Unassigned | 1104_0 | Clustered | 154 VC_1104_0 | 154 | 0.8484 | 1          | 0.8484 | 0 | 0 | 0 | 1 Ref |
| MTI35258 | Unassigned | Unassigned | Unassigned | 1124_0 | Clustered | 10 VC_1124_0  | 10  | 0.6268 | 1          | 0.6268 | 0 | 0 | 0 | 1 Ref |
| MTI35259 | Unassigned | Unassigned | Unassigned | 1126_0 | Clustered | 8 VC_1126_0   | 8   | 0.2864 | 1          | 0.2864 | 0 | 0 | 0 | 1 Ref |
| MTI35261 | Unassigned | Unassigned | Unassigned | 1110_0 | Clustered | 8 VC_1110_0   | 8   | 0.6915 | 1          | 0.6915 | 0 | 0 | 0 | 1 Ref |
| MTI35262 | Unassigned | Unassigned | Unassigned | 1421_0 | Clustered | 4 VC_1421_0   | 4   | 1      | 1          | 1      | 0 | 0 | 0 | 1 Ref |
| MTI35263 | Unassigned | Unassigned | Unassigned | 1104_0 | Clustered | 154 VC_1104_0 | 154 | 0.8484 | 1          | 0.8484 | 0 | 0 | 0 | 1 Ref |
| MTI35264 | Unassigned | Unassigned | Unassigned | 1104_0 | Clustered | 154 VC_1104_0 | 154 | 0.8484 | 1          | 0.8484 | 0 | 0 | 0 | 1 Ref |
| MTI35265 | Unassigned | Unassigned | Unassigned | 1311_0 | Clustered | 5 VC_1311_0   | 5   | 0.8316 | 0.99879053 | 0.8306 | 0 | 0 | 0 | 1 Ref |
| MTI35266 | Unassigned | Unassigned | Unassigned | 1117_0 | Clustered | 5 VC_1117_0   | 5   | 0.4688 | 0.99999974 | 0.4688 | 0 | 0 | 0 | 1 Ref |
| MTI35267 | Unassigned | Unassigned | Unassigned | 1148_0 | Clustered | 16 VC_1148_0  | 16  | 0.8821 | 1          | 0.8821 | 0 | 0 | 0 | 1 Ref |
| MTI35269 | Unassigned | Unassigned | Unassigned | 1341_0 | Clustered | 2 VC_1341_0   | 2   | 0.7733 | 0.5        | 0.3867 | 0 | 0 | 0 | 1 Ref |
| MTI35271 | Unassigned | Unassigned | Unassigned | 1148_0 | Clustered | 16 VC_1148_0  | 16  | 0.8821 | 1          | 0.8821 | 0 | 0 | 0 | 1 Ref |
| MTI35272 | Unassigned | Unassigned | Unassigned | 1104_0 | Clustered | 154 VC_1104_0 | 154 | 0.8484 | 1          | 0.8484 | 0 | 0 | 0 | 1 Ref |
| MTI35273 | Unassigned | Unassigned | Unassigned | 1104_0 | Clustered | 154 VC_1104_0 | 154 | 0.8484 | 1          | 0.8484 | 0 | 0 | 0 | 1 Ref |
| MTI35274 | Unassigned | Unassigned | Unassigned | 1421_0 | Clustered | 4 VC_1421_0   | 4   | 1      | 1          | 1      | 0 | 0 | 0 | 1 Ref |
| MTI35275 | Unassigned | Unassigned | Unassigned | 1149_0 | Clustered | 5 VC_1149_0   | 5   | 0.4768 | 0.9999998  | 0.4768 | 0 | 0 | 0 | 1 Ref |
| MTI35276 | Unassigned | Unassigned | Unassigned | 1283_0 | Clustered | 26 VC_1283_0  | 26  | 0.5446 | 1          | 0.5446 | 0 | 0 | 0 | 1 Ref |
| MTI35277 | Unassigned | Unassigned | Unassigned | 1127_0 | Clustered | 19 VC_1127_0  | 19  | 0.7611 | 1          | 0.7611 | 0 | 0 | 0 | 1 Ref |
| MTI35278 | Unassigned | Unassigned | Unassigned | 1104_0 | Clustered | 154 VC_1104_0 | 154 | 0.8484 | 1          | 0.8484 | 0 | 0 | 0 | 1 Ref |
| MTI35281 | Unassigned | Unassigned | Unassigned | 1148_0 | Clustered | 16 VC_1148_0  | 16  | 0.8821 | 1          | 0.8821 | 0 | 0 | 0 | 1 Ref |
| MTI35282 | Unassigned | Unassigned | Unassigned | 1111_0 | Clustered | 2 VC_1111_0   | 2   | 0.2635 | 0.89847992 | 0.2367 | 0 | 0 | 0 | 1 Ref |
| MTI35284 | Unassigned | Unassigned | Unassigned | 1422_0 | Clustered | 2 VC_1422_0   | 2   | 1      | 1          | 1      | 0 | 0 | 0 | 1 Ref |
| MTI35285 | Unassigned | Unassigned | Unassigned | 1423_0 | Clustered | 8 VC_1423_0   | 8   | 0.896  | 0.99983932 | 0.8959 | 0 | 0 | 0 | 1 Ref |
| MTI35286 | Unassigned | Unassigned | Unassigned | 1423_0 | Clustered | 8 VC_1423_0   | 8   | 0.896  | 0.99983932 | 0.8959 | 0 | 0 | 0 | 1 Ref |
| MTI35287 | Unassigned | Unassigned | Unassigned | 1425_0 | Clustered | 7 VC_1425_0   | 7   | 0.6976 | 0.99999999 | 0.6976 | 0 | 0 | 0 | 1 Ref |
| MTI35288 | Unassigned | Unassigned | Unassigned | 1424_0 | Clustered | 8 VC_1424_0   | 8   | 0.7842 | 1          | 0.7842 | 0 | 0 | 0 | 1 Ref |
| MTI35289 | Unassigned | Unassigned | Unassigned | 1423_0 | Clustered | 8 VC_1423_0   | 8   | 0.896  | 0.99983932 | 0.8959 | 0 | 0 | 0 | 1 Ref |
| MTI35290 | Unassigned | Unassigned | Unassigned | 1424_0 | Clustered | 8 VC_1424_0   | 8   | 0.7842 | 1          | 0.7842 | 0 | 0 | 0 | 1 Ref |
| MTI35291 | Unassigned | Unassigned | Unassigned | 1424_0 | Clustered | 8 VC_1424_0   | 8   | 0.7842 | 1          | 0.7842 | 0 | 0 | 0 | 1 Ref |
| MTI35292 | Unassigned | Unassigned | Unassigned | 1426_0 | Clustered | 4 VC_1426_0   | 4   | 1      | 1          | 1      | 0 | 0 | 0 | 1 Ref |
| MTI35293 | Unassigned | Unassigned | Unassigned | 1426_0 | Clustered | 4 VC_1426_0   | 4   | 1      | 1          | 1      | 0 | 0 | 0 | 1 Ref |
| MTI35294 | Unassigned | Unassigned | Unassigned | 1425_0 | Clustered | 7 VC_1425_0   | 7   | 0.6976 | 0.99999999 | 0.6976 | 0 | 0 | 0 | 1 Ref |
| MTI35296 | Unassigned | Unassigned | Unassigned | 1426_0 | Clustered | 4 VC_1426_0   | 4   | 1      | 1          | 1      | 0 | 0 | 0 | 1 Ref |
| MTI35297 | Unassigned | Unassigned | Unassigned | 1423_0 | Clustered | 8 VC_1423_0   | 8   | 0.896  | 0.99983932 | 0.8959 | 0 | 0 | 0 | 1 Ref |
| MTI35298 | Unassigned | Unassigned | Unassigned | 1425_0 | Clustered | 7 VC_1425_0   | 7   | 0.6976 | 0.99999999 | 0.6976 | 0 | 0 | 0 | 1 Ref |
| MTI35299 | Unassigned | Unassigned | Unassigned | 1425_0 | Clustered | 7 VC_1425_0   | 7   | 0.6976 | 0.99999999 | 0.6976 | 0 | 0 | 0 | 1 Ref |
| MTI35301 | Unassigned | Unassigned | Unassigned | 1424_0 | Clustered | 8 VC_1424_0   | 8   | 0.7842 | 1          | 0.7842 | 0 | 0 | 0 | 1 Ref |
| MTI35302 | Unassigned | Unassigned | Unassigned | 1423_0 | Clustered | 8 VC_1423_0   | 8   | 0.896  | 0.99983932 | 0.8959 | 0 | 0 | 0 | 1 Ref |
| MTI35303 | Unassigned | Unassigned | Unassigned | 1424_0 | Clustered | 8 VC_1424_0   | 8   | 0.7842 | 1          | 0.7842 | 0 | 0 | 0 | 1 Ref |
| MTI35304 | Unassigned | Unassigned | Unassigned | 1425_0 | Clustered | 7 VC_1425_0   | 7   | 0.6976 | 0.99999999 | 0.6976 | 0 | 0 | 0 | 1 Ref |
| MTI35305 | Unassigned | Unassigned | Unassigned | 1426_0 | Clustered | 4 VC_1426_0   | 4   | 1      | 1          | 1      | 0 | 0 | 0 | 1 Ref |
| MTI35306 | Unassigned | Unassigned | Unassigned | 1425_0 | Clustered | 7 VC_1425_0   | 7   | 0.6976 | 0.99999999 | 0.6976 | 0 | 0 | 0 | 1 Ref |
| MTI35307 | Unassigned | Unassigned | Unassigned | 1424_0 | Clustered | 8 VC_1424_0   | 8   | 0.7842 | 1          | 0.7842 | 0 | 0 | 0 | 1 Ref |
| MTI35308 | Unassigned | Unassigned | Unassigned | 1423_0 | Clustered | 8 VC_1423_0   | 8   | 0.896  | 0.99983932 | 0.8959 | 0 | 0 | 0 | 1 Ref |
| MTI35309 | Unassigned | Unassigned | Unassigned | 1424_0 | Clustered | 8 VC_1424_0   | 8   | 0.7842 | 1          | 0.7842 | 0 | 0 | 0 | 1 Ref |
| MTI35310 | Unassigned | Unassigned | Unassigned | 1425_0 | Clustered | 7 VC_1425_0   | 7   | 0.6976 | 0.99999999 | 0.6976 | 0 | 0 | 0 | 1 Ref |
| MTI35311 | Unassigned | Unassigned | Unassigned | 1424_0 | Clustered | 8 VC_1424_0   | 8   | 0.7842 | 1          | 0.7842 | 0 | 0 | 0 | 1 Ref |
| MTI35314 | Unassigned | Unassigned | Unassigned | 1423_0 | Clustered | 8 VC_1423_0   | 8   | 0.896  | 0.99983932 | 0.8959 | 0 | 0 | 0 | 1 Ref |
| MTI35326 | Unassigned | Unassigned | Unassigned | 1308_0 | Clustered | 12 VC_1308_0  | 12  | 0.8184 | 0.9810731  | 0.8029 | 0 | 0 | 0 | 1 Ref |
| MTI35328 | Unassigned | Unassigned | Unassigned | 1309_0 | Clustered | 2 VC_1309_0   | 2   | 0.309  | 0.72985431 | 0.2255 | 0 | 0 | 0 | 1 Ref |
| MTI35329 | Unassigned | Unassigned | Unassigned | 1259_0 | Clustered | 8 VC_1259_0   | 8   | 0.8225 | 1          | 0.8225 | 0 | 0 | 0 | 1 Ref |
| MTI35330 | Unassigned | Unassigned | Unassigned | 1285_0 | Clustered | 25 VC_1285_0  | 25  | 1      | 1          | 1      | 0 | 0 | 0 | 1 Ref |
| MTI35331 | Unassigned | Unassigned | Unassigned | 1298_0 | Clustered | 3 VC_1298_0   | 3   | 0.4889 | 0.98167473 | 0.4799 | 0 | 0 | 0 | 1 Ref |
| MTI35332 | Unassigned | Unassigned | Unassigned | 1427_0 | Clustered | 2 VC_1427_0   | 2   | 1      | 1          | 1      | 0 | 0 | 0 | 1 Ref |
| MTI35333 | Unassigned | Unassigned | Unassigned | 1277_0 | Clustered | 14 VC_1277_0  | 14  | 0.8218 | 1          | 0.8218 | 0 | 0 | 0 | 1 Ref |
| MTI35334 | Unassigned | Unassigned | Unassigned | 1110_0 | Clustered | 8 VC_1110_0   | 8   | 0.6915 | 1          | 0.6915 | 0 | 0 | 0 | 1 Ref |
| MTI35335 | Unassigned | Unassigned | Unassigned | 1340_0 | Clustered | 5 VC_1340_0   | 5   | 1      | 1          | 1      | 0 | 0 | 0 | 1 Ref |
| MTI35336 | Unassigned | Unassigned | Unassigned | 1251_0 | Clustered | 15 VC_1251_0  | 15  | 0.9082 | 1          | 0.9082 | 0 | 0 | 0 | 1 Ref |
| MTI35337 | Unassigned | Unassigned | Unassigned | 1144_0 | Clustered | 7 VC_1144_0   | 7   | 0.7076 | 1          | 0.7076 | 0 | 0 | 0 | 1 Ref |
| MTI35338 | Unassigned | Unassigned | Unassigned | 1104_0 | Clustered | 154 VC_1104_0 | 154 | 0.8484 | 1          | 0.8484 | 0 | 0 | 0 | 1 Ref |
| MTI35339 | Unassigned | Unassigned | Unassigned | 1233_0 | Clustered | 16 VC_1233_0  | 16  | 0.8971 | 1          | 0.8971 | 0 | 0 | 0 | 1 Ref |
| MTI35340 | Unassigned | Unassigned | Unassigned | 1340_0 | Clustered | 5 VC_1340_0   | 5   | 1      | 1          | 1      | 0 | 0 | 0 | 1 Ref |
| MTI35342 | Unassigned | Unassigned | Unassigned | 1211_0 | Clustered | 25 VC_1211_0  | 25  | 1      | 1          | 1      | 0 | 0 | 0 | 1 Ref |
| MTI35343 | Unassigned | Unassigned | Unassigned | 1312_0 | Clustered | 3 VC_1312_0   | 3   | 1      | 1          | 1      | 0 | 0 | 0 | 1 Ref |
| MTI35344 | Unassigned | Unassigned | Unassigned | 672_0  | Clustered | 12 VC_672_0   | 12  | 1      | 1          | 1      | 0 | 0 | 0 | 1 Ref |
| MTI35345 | Unassigned | Unassigned | Unassigned | 1268_0 | Clustered | 3 VC_1268_0   | 3   | 0.0807 | 0.6862532  | 0.0554 | 0 | 0 | 0 | 1 Ref |
| MTI35346 | Unassigned | Unassigned | Unassigned | 1428_0 | Clustered | 2 VC_1428_0   | 2   | 1      | 1          | 1      | 0 | 0 | 0 | 1 Ref |
| MTI35347 | Unassigned | Unassigned | Unassigned | 1243_0 | Clustered | 52 VC_1243_0  | 52  | 0.9126 | 0.92708311 | 0.8461 | 0 | 0 | 0 | 1 Ref |
| MTI35348 | Unassigned | Unassigned | Unassigned | 1233_0 | Clustered | 16 VC_1233_0  | 16  | 0.8971 | 1          | 0.8971 | 0 | 0 | 0 | 1 Ref |
| MTI35349 | Unassigned | Unassigned | Unassigned | 1315_0 | Clustered | 4 VC_1315_0   | 4   | 0.8005 | 0.98875328 | 0.7915 | 0 | 0 | 0 | 1 Ref |
| MTI35350 | Unassigned | Unassigned | Unassigned | 1331_0 | Clustered | 4 VC_1331_0   | 4   | 0.7343 | 0.99899459 | 0.7335 | 0 | 0 | 0 | 1 Ref |
| MTI35351 | Unassigned | Unassigned | Unassigned | 1122_0 | Clustered | 10 VC_1122_0  | 10  | 0.9643 | 0.99999697 | 0.9643 | 0 | 0 | 0 | 1 Ref |
| MTI35352 | Unassigned | Unassigned | Unassigned | 1243_0 | Clustered | 52 VC_1243_0  | 52  | 0.9126 | 0.92708311 | 0.8461 | 0 | 0 | 0 | 1 Ref |
| MTI35353 | Unassigned | Unassigned | Unassigned | 1305_0 | Clustered | 5 VC_1305_0   | 5   | 0.7701 | 0.66985041 | 0.5159 | 0 | 0 | 0 | 1 Ref |
| MTI35354 | Unassigned | Unassigned | Unassigned | 1260_0 | Clustered | 2 VC_1260_0   | 2   | 1      | 1          | 1      | 0 | 0 | 0 | 1 Ref |
| MTI35355 | Unassigned | Unassigned | Unassigned | 1243_0 | Clustered | 52 VC_1243_0  | 52  | 0.9126 | 0.92708311 | 0.8461 | 0 | 0 | 0 | 1 Ref |
| MTI35357 | Unassigned | Unassigned | Unassigned | 1271_0 | Clustered | 2 VC_1271_0   | 2   | 1      | 1          | 1      | 0 | 0 | 0 | 1 Ref |
| MTI35358 | Unassigned | Unassigned | Unassigned | 1273_0 | Clustered | 6 VC_1273_0   | 6   | 0.7385 | 0.9999804  | 0.7385 | 0 | 0 | 0 | 1 Ref |
| MTI35359 | Unassigned | Unassigned | Unassigned | 1429_0 | Clustered | 8 VC_1429_0   | 8   | 0.9714 | 0.94517081 | 0.9182 | 0 | 0 | 0 | 1 Ref |
| MTI35361 | Unassigned | Unassigned | Unassigned | 1233_0 | Clustered | 16 VC_1233_0  | 16  | 0.8971 | 1          | 0.8971 | 0 | 0 | 0 | 1 Ref |
| MTI35363 | Unassigned | Unassigned | Unassigned | 1315_0 | Clustered | 4 VC_1315_0   | 4   | 0.8005 | 0.98875328 | 0.7915 | 0 | 0 | 0 | 1 Ref |



|          |            |            |            |        |           |              |    |        |            |        |   |   |   |       |
|----------|------------|------------|------------|--------|-----------|--------------|----|--------|------------|--------|---|---|---|-------|
| MT135365 | Unassigned | Unassigned | Unassigned | 1289_0 | Clustered | 2 VC_1289_0  | 2  | 0.4661 | 0.85557782 | 0.3987 | 0 | 0 | 0 | 1 Ref |
| MT135366 | Unassigned | Unassigned | Unassigned | 1243_0 | Clustered | 52 VC_1243_0 | 52 | 0.9126 | 0.92708311 | 0.8461 | 0 | 0 | 0 | 1 Ref |
| MT135367 | Unassigned | Unassigned | Unassigned | 1253_0 | Clustered | 6 VC_1253_0  | 6  | 0.6097 | 1          | 0.6097 | 0 | 0 | 0 | 1 Ref |
| MT135368 | Unassigned | Unassigned | Unassigned | 1429_0 | Clustered | 8 VC_1429_0  | 8  | 0.9714 | 0.94517081 | 0.9182 | 0 | 0 | 0 | 1 Ref |
| MT135369 | Unassigned | Unassigned | Unassigned | 1430_0 | Clustered | 4 VC_1430_0  | 4  | 1      | 1          | 1      | 0 | 0 | 0 | 1 Ref |
| MT135370 | Unassigned | Unassigned | Unassigned | 1335_0 | Clustered | 7 VC_1335_0  | 7  | 0.8346 | 0.99999844 | 0.8346 | 0 | 0 | 0 | 1 Ref |
| MT135371 | Unassigned | Unassigned | Unassigned | 1192_0 | Clustered | 3 VC_1192_0  | 3  | 0.407  | 0.99427327 | 0.4046 | 0 | 0 | 0 | 1 Ref |
| MT135372 | Unassigned | Unassigned | Unassigned | 1322_0 | Clustered | 2 VC_1322_0  | 2  | 1      | 1          | 1      | 0 | 0 | 0 | 1 Ref |
| MT135373 | Unassigned | Unassigned | Unassigned | 1335_0 | Clustered | 7 VC_1335_0  | 7  | 0.8346 | 0.99999844 | 0.8346 | 0 | 0 | 0 | 1 Ref |
| MT135374 | Unassigned | Unassigned | Unassigned | 1429_0 | Clustered | 8 VC_1429_0  | 8  | 0.9714 | 0.94517081 | 0.9182 | 0 | 0 | 0 | 1 Ref |
| MT135375 | Unassigned | Unassigned | Unassigned | 1431_0 | Clustered | 3 VC_1431_0  | 3  | 1      | 1          | 1      | 0 | 0 | 0 | 1 Ref |
| MT135376 | Unassigned | Unassigned | Unassigned | 1340_0 | Clustered | 5 VC_1340_0  | 5  | 1      | 1          | 1      | 0 | 0 | 0 | 1 Ref |
| MT135377 | Unassigned | Unassigned | Unassigned | 1273_0 | Clustered | 6 VC_1273_0  | 6  | 0.7385 | 0.9999804  | 0.7385 | 0 | 0 | 0 | 1 Ref |
| MT135378 | Unassigned | Unassigned | Unassigned | 1429_0 | Clustered | 8 VC_1429_0  | 8  | 0.9714 | 0.94517081 | 0.9182 | 0 | 0 | 0 | 1 Ref |
| MT135379 | Unassigned | Unassigned | Unassigned | 1277_0 | Clustered | 14 VC_1277_0 | 14 | 0.8218 | 1          | 0.8218 | 0 | 0 | 0 | 1 Ref |
| MT135380 | Unassigned | Unassigned | Unassigned | 1270_0 | Clustered | 3 VC_1270_0  | 3  | 0.6808 | 0.98688028 | 0.6719 | 0 | 0 | 0 | 1 Ref |
| MT135381 | Unassigned | Unassigned | Unassigned | 1243_0 | Clustered | 52 VC_1243_0 | 52 | 0.9126 | 0.92708311 | 0.8461 | 0 | 0 | 0 | 1 Ref |
| MT135382 | Unassigned | Unassigned | Unassigned | 1243_0 | Clustered | 52 VC_1243_0 | 52 | 0.9126 | 0.92708311 | 0.8461 | 0 | 0 | 0 | 1 Ref |
| MT135383 | Unassigned | Unassigned | Unassigned | 1327_0 | Clustered | 4 VC_1327_0  | 4  | 1      | 1          | 1      | 0 | 0 | 0 | 1 Ref |
| MT135384 | Unassigned | Unassigned | Unassigned | 1233_0 | Clustered | 16 VC_1233_0 | 16 | 0.8971 | 1          | 0.8971 | 0 | 0 | 0 | 1 Ref |
| MT135385 | Unassigned | Unassigned | Unassigned | 1288_0 | Clustered | 3 VC_1288_0  | 3  | 1      | 1          | 1      | 0 | 0 | 0 | 1 Ref |
| MT135387 | Unassigned | Unassigned | Unassigned | 1243_0 | Clustered | 52 VC_1243_0 | 52 | 0.9126 | 0.92708311 | 0.8461 | 0 | 0 | 0 | 1 Ref |
| MT135388 | Unassigned | Unassigned | Unassigned | 1272_0 | Clustered | 5 VC_1272_0  | 5  | 1      | 1          | 1      | 0 | 0 | 0 | 1 Ref |
| MT135389 | Unassigned | Unassigned | Unassigned | 1421_0 | Clustered | 4 VC_1421_0  | 4  | 1      | 1          | 1      | 0 | 0 | 0 | 1 Ref |
| MT135391 | Unassigned | Unassigned | Unassigned | 1277_0 | Clustered | 14 VC_1277_0 | 14 | 0.8218 | 1          | 0.8218 | 0 | 0 | 0 | 1 Ref |
| MT135392 | Unassigned | Unassigned | Unassigned | 1315_0 | Clustered | 4 VC_1315_0  | 4  | 0.8005 | 0.98875328 | 0.7915 | 0 | 0 | 0 | 1 Ref |
| MT135393 | Unassigned | Unassigned | Unassigned | 1340_0 | Clustered | 5 VC_1340_0  | 5  | 1      | 1          | 1      | 0 | 0 | 0 | 1 Ref |
| MT135394 | Unassigned | Unassigned | Unassigned | 1246_0 | Clustered | 2 VC_1246_0  | 2  | 1      | 1          | 1      | 0 | 0 | 0 | 1 Ref |
| MT135395 | Unassigned | Unassigned | Unassigned | 1428_0 | Clustered | 2 VC_1428_0  | 2  | 1      | 1          | 1      | 0 | 0 | 0 | 1 Ref |
| MT135396 | Unassigned | Unassigned | Unassigned | 1430_0 | Clustered | 4 VC_1430_0  | 4  | 1      | 1          | 1      | 0 | 0 | 0 | 1 Ref |
| MT135397 | Unassigned | Unassigned | Unassigned | 1307_0 | Clustered | 2 VC_1307_0  | 2  | 0.522  | 0.72985431 | 0.381  | 0 | 0 | 0 | 1 Ref |
| MT135399 | Unassigned | Unassigned | Unassigned | 1429_0 | Clustered | 8 VC_1429_0  | 8  | 0.9714 | 0.94517081 | 0.9182 | 0 | 0 | 0 | 1 Ref |
| MT135400 | Unassigned | Unassigned | Unassigned | 1305_0 | Clustered | 5 VC_1305_0  | 5  | 0.7701 | 0.66985041 | 0.5159 | 0 | 0 | 0 | 1 Ref |
| MT135401 | Unassigned | Unassigned | Unassigned | 1277_0 | Clustered | 14 VC_1277_0 | 14 | 0.8218 | 1          | 0.8218 | 0 | 0 | 0 | 1 Ref |
| MT135402 | Unassigned | Unassigned | Unassigned | 1305_0 | Clustered | 5 VC_1305_0  | 5  | 0.7701 | 0.66985041 | 0.5159 | 0 | 0 | 0 | 1 Ref |
| MT135403 | Unassigned | Unassigned | Unassigned | 1327_0 | Clustered | 4 VC_1327_0  | 4  | 1      | 1          | 1      | 0 | 0 | 0 | 1 Ref |
| MT135404 | Unassigned | Unassigned | Unassigned | 672_0  | Clustered | 12 VC_672_0  | 12 | 1      | 1          | 1      | 0 | 0 | 0 | 1 Ref |
| MT135405 | Unassigned | Unassigned | Unassigned | 1069_0 | Clustered | 4 VC_1069_0  | 4  | 1      | 1          | 1      | 0 | 0 | 0 | 1 Ref |
| MT135406 | Unassigned | Unassigned | Unassigned | 1285_0 | Clustered | 25 VC_1285_0 | 25 | 1      | 1          | 1      | 0 | 0 | 0 | 1 Ref |
| MT135407 | Unassigned | Unassigned | Unassigned | 1307_0 | Clustered | 2 VC_1307_0  | 2  | 0.522  | 0.72985431 | 0.381  | 0 | 0 | 0 | 1 Ref |
| MT135408 | Unassigned | Unassigned | Unassigned | 1315_0 | Clustered | 4 VC_1315_0  | 4  | 0.8005 | 0.98875328 | 0.7915 | 0 | 0 | 0 | 1 Ref |
| MT135409 | Unassigned | Unassigned | Unassigned | 1233_0 | Clustered | 16 VC_1233_0 | 16 | 0.8971 | 1          | 0.8971 | 0 | 0 | 0 | 1 Ref |
| MT135410 | Unassigned | Unassigned | Unassigned | 1290_0 | Clustered | 2 VC_1290_0  | 2  | 1      | 1          | 1      | 0 | 0 | 0 | 1 Ref |
| MT135411 | Unassigned | Unassigned | Unassigned | 1302_0 | Clustered | 3 VC_1302_0  | 3  | 1      | 1          | 1      | 0 | 0 | 0 | 1 Ref |
| MT135412 | Unassigned | Unassigned | Unassigned | 672_0  | Clustered | 12 VC_672_0  | 12 | 1      | 1          | 1      | 0 | 0 | 0 | 1 Ref |
| MT135413 | Unassigned | Unassigned | Unassigned | 1421_0 | Clustered | 4 VC_1421_0  | 4  | 1      | 1          | 1      | 0 | 0 | 0 | 1 Ref |
| MT135414 | Unassigned | Unassigned | Unassigned | 1429_0 | Clustered | 8 VC_1429_0  | 8  | 0.9714 | 0.94517081 | 0.9182 | 0 | 0 | 0 | 1 Ref |
| MT135415 | Unassigned | Unassigned | Unassigned | 1278_0 | Clustered | 3 VC_1278_0  | 3  | 0.3961 | 0.99705286 | 0.395  | 0 | 0 | 0 | 1 Ref |
| MT135416 | Unassigned | Unassigned | Unassigned | 1312_0 | Clustered | 3 VC_1312_0  | 3  | 1      | 1          | 1      | 0 | 0 | 0 | 1 Ref |
| MT135418 | Unassigned | Unassigned | Unassigned | 1335_0 | Clustered | 7 VC_1335_0  | 7  | 0.8346 | 0.99999844 | 0.8346 | 0 | 0 | 0 | 1 Ref |
| MT135419 | Unassigned | Unassigned | Unassigned | 1429_0 | Clustered | 8 VC_1429_0  | 8  | 0.9714 | 0.94517081 | 0.9182 | 0 | 0 | 0 | 1 Ref |
| MT135420 | Unassigned | Unassigned | Unassigned | 1306_0 | Clustered | 2 VC_1306_0  | 2  | 1      | 1          | 1      | 0 | 0 | 0 | 1 Ref |
| MT135421 | Unassigned | Unassigned | Unassigned | 1337_0 | Clustered | 2 VC_1337_0  | 2  | 1      | 1          | 1      | 0 | 0 | 0 | 1 Ref |
| MT135422 | Unassigned | Unassigned | Unassigned | 1192_0 | Clustered | 3 VC_1192_0  | 3  | 0.407  | 0.99427327 | 0.4046 | 0 | 0 | 0 | 1 Ref |
| MT135423 | Unassigned | Unassigned | Unassigned | 1270_0 | Clustered | 3 VC_1270_0  | 3  | 0.6808 | 0.98688028 | 0.6719 | 0 | 0 | 0 | 1 Ref |
| MT135424 | Unassigned | Unassigned | Unassigned | 1144_0 | Clustered | 7 VC_1144_0  | 7  | 0.7076 | 1          | 0.7076 | 0 | 0 | 0 | 1 Ref |
| MT135425 | Unassigned | Unassigned | Unassigned | 1283_0 | Clustered | 26 VC_1283_0 | 26 | 0.5446 | 1          | 0.5446 | 0 | 0 | 0 | 1 Ref |
| MT135426 | Unassigned | Unassigned | Unassigned | 1273_0 | Clustered | 6 VC_1273_0  | 6  | 0.7385 | 0.9999804  | 0.7385 | 0 | 0 | 0 | 1 Ref |
| MT135427 | Unassigned | Unassigned | Unassigned | 1273_0 | Clustered | 6 VC_1273_0  | 6  | 0.7385 | 0.9999804  | 0.7385 | 0 | 0 | 0 | 1 Ref |
| MT135429 | Unassigned | Unassigned | Unassigned | 1341_0 | Clustered | 2 VC_1341_0  | 2  | 0.7733 | 0.5        | 0.3867 | 0 | 0 | 0 | 1 Ref |
| MT135430 | Unassigned | Unassigned | Unassigned | 1335_0 | Clustered | 7 VC_1335_0  | 7  | 0.8346 | 0.99999844 | 0.8346 | 0 | 0 | 0 | 1 Ref |
| MT135431 | Unassigned | Unassigned | Unassigned | 1285_0 | Clustered | 25 VC_1285_0 | 25 | 1      | 1          | 1      | 0 | 0 | 0 | 1 Ref |
| MT135432 | Unassigned | Unassigned | Unassigned | 1192_0 | Clustered | 3 VC_1192_0  | 3  | 0.407  | 0.99427327 | 0.4046 | 0 | 0 | 0 | 1 Ref |
| MT135433 | Unassigned | Unassigned | Unassigned | 1253_0 | Clustered | 6 VC_1253_0  | 6  | 0.6097 | 1          | 0.6097 | 0 | 0 | 0 | 1 Ref |
| MT135434 | Unassigned | Unassigned | Unassigned | 1279_0 | Clustered | 4 VC_1279_0  | 4  | 0.6058 | 0.76972092 | 0.4663 | 0 | 0 | 0 | 1 Ref |
| MT135435 | Unassigned | Unassigned | Unassigned | 1233_0 | Clustered | 16 VC_1233_0 | 16 | 0.8971 | 1          | 0.8971 | 0 | 0 | 0 | 1 Ref |
| MT135436 | Unassigned | Unassigned | Unassigned | 1427_0 | Clustered | 2 VC_1427_0  | 2  | 1      | 1          | 1      | 0 | 0 | 0 | 1 Ref |
| MT135437 | Unassigned | Unassigned | Unassigned | 1277_0 | Clustered | 14 VC_1277_0 | 14 | 0.8218 | 1          | 0.8218 | 0 | 0 | 0 | 1 Ref |
| MT135438 | Unassigned | Unassigned | Unassigned | 1431_0 | Clustered | 3 VC_1431_0  | 3  | 1      | 1          | 1      | 0 | 0 | 0 | 1 Ref |
| MT135439 | Unassigned | Unassigned | Unassigned | 1252_0 | Clustered | 3 VC_1252_0  | 3  | 0.3237 | 0.99790393 | 0.323  | 0 | 0 | 0 | 1 Ref |
| MT135440 | Unassigned | Unassigned | Unassigned | 1194_0 | Clustered | 5 VC_1194_0  | 5  | 0.5236 | 0.99999899 | 0.5236 | 0 | 0 | 0 | 1 Ref |
| MT135441 | Unassigned | Unassigned | Unassigned | 1251_0 | Clustered | 15 VC_1251_0 | 15 | 0.9082 | 1          | 0.9082 | 0 | 0 | 0 | 1 Ref |
| MT135443 | Unassigned | Unassigned | Unassigned | 1272_0 | Clustered | 5 VC_1272_0  | 5  | 1      | 1          | 1      | 0 | 0 | 0 | 1 Ref |
| MT135444 | Unassigned | Unassigned | Unassigned | 1243_0 | Clustered | 52 VC_1243_0 | 52 | 0.9126 | 0.92708311 | 0.8461 | 0 | 0 | 0 | 1 Ref |
| MT135445 | Unassigned | Unassigned | Unassigned | 1277_0 | Clustered | 14 VC_1277_0 | 14 | 0.8218 | 1          | 0.8218 | 0 | 0 | 0 | 1 Ref |
| MT135446 | Unassigned | Unassigned | Unassigned | 1194_0 | Clustered | 5 VC_1194_0  | 5  | 0.5236 | 0.99999899 | 0.5236 | 0 | 0 | 0 | 1 Ref |
| MT135447 | Unassigned | Unassigned | Unassigned | 1293_0 | Clustered | 4 VC_1293_0  | 4  | 0.7847 | 0.99289298 | 0.7791 | 0 | 0 | 0 | 1 Ref |
| MT135451 | Unassigned | Unassigned | Unassigned | 1279_0 | Clustered | 4 VC_1279_0  | 4  | 0.6058 | 0.76972092 | 0.4663 | 0 | 0 | 0 | 1 Ref |
| MT135453 | Unassigned | Unassigned | Unassigned | 1431_0 | Clustered | 3 VC_1431_0  | 3  | 1      | 1          | 1      | 0 | 0 | 0 | 1 Ref |
| MT135454 | Unassigned | Unassigned | Unassigned | 1430_0 | Clustered | 4 VC_1430_0  | 4  | 1      | 1          | 1      | 0 | 0 | 0 | 1 Ref |
| MT135455 | Unassigned | Unassigned | Unassigned | 1335_0 | Clustered | 7 VC_1335_0  | 7  | 0.8346 | 0.99999844 | 0.8346 | 0 | 0 | 0 | 1 Ref |



|          |            |            |            |         |                     |              |    |        |            |        |   |   |   |            |
|----------|------------|------------|------------|---------|---------------------|--------------|----|--------|------------|--------|---|---|---|------------|
| MT135456 | Unassigned | Unassigned | Unassigned | 1327_0  | Clustered           | 4 VC_1327_0  | 4  | 1      | 1          | 1      | 0 | 0 | 0 | 1 Ref      |
| MT135457 | Unassigned | Unassigned | Unassigned | 1331_0  | Clustered           | 4 VC_1331_0  | 4  | 0.7343 | 0.99899459 | 0.7335 | 0 | 0 | 0 | 1 Ref      |
| MT135458 | Unassigned | Unassigned | Unassigned | 1285_0  | Clustered           | 25 VC_1285_0 | 25 | 1      | 1          | 1      | 0 | 0 | 0 | 1 Ref      |
| MT135459 | Unassigned | Unassigned | Unassigned | 1335_0  | Clustered           | 7 VC_1335_0  | 7  | 0.8346 | 0.99999844 | 0.8346 | 0 | 0 | 0 | 1 Ref      |
| MT135460 | Unassigned | Unassigned | Unassigned | 1430_0  | Clustered           | 4 VC_1430_0  | 4  | 1      | 1          | 1      | 0 | 0 | 0 | 1 Ref      |
| MT135461 | Unassigned | Unassigned | Unassigned | 1298_0  | Clustered           | 3 VC_1298_0  | 3  | 0.4889 | 0.98167473 | 0.4799 | 0 | 0 | 0 | 1 Ref      |
| MT135462 | Unassigned | Unassigned | Unassigned | 1272_0  | Clustered           | 5 VC_1272_0  | 5  | 1      | 1          | 1      | 0 | 0 | 0 | 1 Ref      |
| MT135463 | Unassigned | Unassigned | Unassigned | 1429_0  | Clustered           | 8 VC_1429_0  | 8  | 0.9714 | 0.94517081 | 0.9182 | 0 | 0 | 0 | 1 Ref      |
| MT136606 | Unassigned | Unassigned | Unassigned | 829_0   | Clustered           | 5 VC_829_0   | 5  | 0.8821 | 0.99999832 | 0.8821 | 0 | 0 | 0 | 1 Ref      |
| MT150133 | Unassigned | Unassigned | Unassigned | 290_5   | Clustered           | 14 VC_290_5  | 14 | 0.1422 | 1          | 0.1422 | 0 | 0 | 0 | 0.9231 Ref |
| MT151604 | Unassigned | Unassigned | Unassigned | 85_12   | Clustered/Singleton | 1 VC_85_12   | 1  | 0      | 1          | 0      | 0 | 0 | 0 | 1 Ref      |
| MT152150 | Unassigned | Unassigned | Unassigned | 631_0   | Clustered           | 3 VC_631_0   | 3  | 0.1213 | 0.99819199 | 0.1211 | 0 | 0 | 0 | 1 Ref      |
| MT152698 | Unassigned | Unassigned | Unassigned | 1002_0  | Clustered           | 2 VC_1002_0  | 2  | 0.1809 | 0.72090768 | 0.1304 | 0 | 0 | 0 | 1 Ref      |
| MT157285 | Unassigned | Unassigned | Unassigned | 668_0   | Clustered           | 25 VC_668_0  | 25 | 0.5539 | 1          | 0.5539 | 0 | 0 | 0 | 0.96 Ref   |
| MT161381 | Unassigned | Unassigned | Unassigned | 125_0   | Clustered           | 17 VC_125_0  | 17 | 0.9244 | 1          | 0.9244 | 0 | 0 | 0 | 1 Ref      |
| MT161382 | Unassigned | Unassigned | Unassigned | 125_0   | Clustered           | 17 VC_125_0  | 17 | 0.9244 | 1          | 0.9244 | 0 | 0 | 0 | 1 Ref      |
| MT161383 | Unassigned | Unassigned | Unassigned | 125_0   | Clustered           | 17 VC_125_0  | 17 | 0.9244 | 1          | 0.9244 | 0 | 0 | 0 | 1 Ref      |
| MT161384 | Unassigned | Unassigned | Unassigned | 125_0   | Clustered           | 17 VC_125_0  | 17 | 0.9244 | 1          | 0.9244 | 0 | 0 | 0 | 1 Ref      |
| MT162466 | Unassigned | Unassigned | Unassigned | 435_0   | Clustered           | 2 VC_435_0   | 2  | 0.0423 | 0.95727719 | 0.0405 | 0 | 0 | 0 | 1 Ref      |
| MT162467 | Unassigned | Unassigned | Unassigned | 435_0   | Clustered           | 2 VC_435_0   | 2  | 0.0423 | 0.95727719 | 0.0405 | 0 | 0 | 0 | 1 Ref      |
| MT176424 | Unassigned | Unassigned | Unassigned | 283_27  | Clustered/Singleton | 1 VC_283_27  | 1  | 0      | 1          | 0      | 0 | 0 | 0 | 1 Ref      |
| MT176425 | Unassigned | Unassigned | Unassigned | 283_49  | Clustered/Singleton | 1 VC_283_49  | 1  | 0      | 1          | 0      | 0 | 0 | 0 | 1 Ref      |
| MT176426 | Unassigned | Unassigned | Unassigned | 283_28  | Clustered/Singleton | 1 VC_283_28  | 1  | 0      | 1          | 0      | 0 | 0 | 0 | 1 Ref      |
| MT178275 | Unassigned | Unassigned | Unassigned | 582_3   | Clustered           | 12 VC_582_3  | 12 | 0.2357 | 1          | 0.2357 | 0 | 0 | 0 | 0.8636 Ref |
| MT178448 | Unassigned | Unassigned | Unassigned | 837_0   | Clustered           | 29 VC_837_0  | 29 | 0.9955 | 1          | 0.9955 | 0 | 0 | 0 | 1 Ref      |
| MT178766 | Unassigned | Unassigned | Unassigned | 739_0   | Clustered           | 26 VC_739_0  | 26 | 0.9571 | 1          | 0.9571 | 0 | 0 | 0 | 1 Ref      |
| MT178767 | Unassigned | Unassigned | Unassigned | 739_0   | Clustered           | 26 VC_739_0  | 26 | 0.9571 | 1          | 0.9571 | 0 | 0 | 0 | 1 Ref      |
| MT179807 | Unassigned | Unassigned | Unassigned | 283_161 | Clustered/Singleton | 1 VC_283_161 | 1  | 0      | 1          | 0      | 0 | 0 | 0 | 1 Ref      |
| MT188223 | Unassigned | Unassigned | Unassigned | 700_0   | Clustered           | 10 VC_700_0  | 10 | 0.8076 | 1          | 0.8076 | 0 | 0 | 0 | 1 Ref      |
| MT188662 | Unassigned | Unassigned | Unassigned | 17_0    | Clustered           | 9 VC_17_0    | 9  | 0.6969 | 1          | 0.6969 | 0 | 0 | 0 | 1 Ref      |
| MT188663 | Unassigned | Unassigned | Unassigned | 17_0    | Clustered           | 9 VC_17_0    | 9  | 0.6969 | 1          | 0.6969 | 0 | 0 | 0 | 1 Ref      |
| MT188664 | Unassigned | Unassigned | Unassigned | 17_0    | Clustered           | 9 VC_17_0    | 9  | 0.6969 | 1          | 0.6969 | 0 | 0 | 0 | 1 Ref      |
| MT188665 | Unassigned | Unassigned | Unassigned | 17_0    | Clustered           | 9 VC_17_0    | 9  | 0.6969 | 1          | 0.6969 | 0 | 0 | 0 | 1 Ref      |
| MT188666 | Unassigned | Unassigned | Unassigned | 17_0    | Clustered           | 9 VC_17_0    | 9  | 0.6969 | 1          | 0.6969 | 0 | 0 | 0 | 1 Ref      |
| MT193276 | Unassigned | Unassigned | Unassigned | 647_0   | Clustered           | 11 VC_647_0  | 11 | 0.598  | 1          | 0.598  | 0 | 0 | 0 | 1 Ref      |
| MT193890 | Unassigned | Unassigned | Unassigned | 17_0    | Clustered           | 9 VC_17_0    | 9  | 0.6969 | 1          | 0.6969 | 0 | 0 | 0 | 1 Ref      |
| MT197175 | Unassigned | Unassigned | Unassigned | 111_0   | Clustered           | 91 VC_111_0  | 91 | 0.9587 | 1          | 0.9587 | 0 | 0 | 0 | 1 Ref      |
| MT197176 | Unassigned | Unassigned | Unassigned | 111_0   | Clustered           | 91 VC_111_0  | 91 | 0.9587 | 1          | 0.9587 | 0 | 0 | 0 | 1 Ref      |
| MT210154 | Unassigned | Unassigned | Unassigned | 934_0   | Clustered           | 2 VC_934_0   | 2  | 0.8613 | 0.92499224 | 0.7967 | 0 | 0 | 0 | 1 Ref      |
| MT215167 | Unassigned | Unassigned | Unassigned | 82_0    | Clustered           | 24 VC_82_0   | 24 | 0.7351 | 1          | 0.7351 | 0 | 0 | 0 | 1 Ref      |
| MT226657 | Unassigned | Unassigned | Unassigned | 149_8   | Clustered           | 66 VC_149_8  | 66 | 0.4565 | 1          | 0.4565 | 0 | 0 | 0 | 0.8182 Ref |
| MT227924 | Unassigned | Unassigned | Unassigned | 354_0   | Clustered           | 4 VC_354_0   | 4  | 0.1749 | 0.99998684 | 0.1749 | 0 | 0 | 0 | 0.8333 Ref |
| MT227925 | Unassigned | Unassigned | Unassigned | 989_0   | Clustered           | 2 VC_989_0   | 2  | 0.1205 | 0.95251219 | 0.1148 | 0 | 0 | 0 | 1 Ref      |
| MT230534 | Unassigned | Unassigned | Unassigned | 792_0   | Clustered           | 35 VC_792_0  | 35 | 0.9828 | 1          | 0.9828 | 0 | 0 | 0 | 1 Ref      |
| MT233524 | Unassigned | Unassigned | Unassigned | 190_39  | Clustered/Singleton | 1 VC_190_39  | 1  | 0      | 1          | 0      | 0 | 0 | 0 | 1 Ref      |
| MT234338 | Unassigned | Unassigned | Unassigned | 786_0   | Clustered           | 3 VC_786_0   | 3  | 0.0814 | 0.99854097 | 0.0813 | 0 | 0 | 0 | 1 Ref      |
| MT234339 | Unassigned | Unassigned | Unassigned | 786_0   | Clustered           | 3 VC_786_0   | 3  | 0.0814 | 0.99854097 | 0.0813 | 0 | 0 | 0 | 1 Ref      |
| MT234340 | Unassigned | Unassigned | Unassigned | 786_0   | Clustered           | 3 VC_786_0   | 3  | 0.0814 | 0.99854097 | 0.0813 | 0 | 0 | 0 | 1 Ref      |
| MT234341 | Unassigned | Unassigned | Unassigned | 969_0   | Clustered           | 3 VC_969_0   | 3  | 0.8314 | 0.99762851 | 0.8295 | 0 | 0 | 0 | 1 Ref      |
| MT234342 | Unassigned | Unassigned | Unassigned | 1052_0  | Clustered           | 2 VC_1052_0  | 2  | 0.0778 | 0.94600647 | 0.0736 | 0 | 0 | 0 | 1 Ref      |
| MT234343 | Unassigned | Unassigned | Unassigned | 1052_0  | Clustered           | 2 VC_1052_0  | 2  | 0.0778 | 0.94600647 | 0.0736 | 0 | 0 | 0 | 1 Ref      |
| MT234670 | Unassigned | Unassigned | Unassigned | 1433_0  | Clustered           | 2 VC_1433_0  | 2  | 1      | 1          | 1      | 0 | 0 | 0 | 1 Ref      |
| MT239398 | Unassigned | Unassigned | Unassigned | 228_0   | Clustered           | 60 VC_228_0  | 60 | 0.942  | 1          | 0.942  | 0 | 0 | 0 | 1 Ref      |
| MT241605 | Unassigned | Unassigned | Unassigned | 171_0   | Clustered           | 8 VC_171_0   | 8  | 0.5884 | 1          | 0.5884 | 0 | 0 | 0 | 1 Ref      |
| MT241607 | Unassigned | Unassigned | Unassigned | 171_0   | Clustered           | 8 VC_171_0   | 8  | 0.5884 | 1          | 0.5884 | 0 | 0 | 0 | 1 Ref      |
| MT251347 | Unassigned | Unassigned | Unassigned | 359_0   | Clustered           | 7 VC_359_0   | 7  | 0.3703 | 1          | 0.3703 | 0 | 0 | 0 | 1 Ref      |
| MT251348 | Unassigned | Unassigned | Unassigned | 359_0   | Clustered           | 7 VC_359_0   | 7  | 0.3703 | 1          | 0.3703 | 0 | 0 | 0 | 1 Ref      |
| MT254578 | Unassigned | Unassigned | Unassigned | 475_2   | Clustered           | 3 VC_475_2   | 3  | 0.0585 | 0.98883022 | 0.0578 | 0 | 0 | 0 | 1 Ref      |
| MT261384 | Unassigned | Unassigned | Unassigned | 476_0   | Clustered           | 19 VC_476_0  | 19 | 0.7814 | 1          | 0.7814 | 0 | 0 | 0 | 1 Ref      |
| MT263719 | Unassigned | Unassigned | Unassigned | 699_0   | Clustered           | 71 VC_699_0  | 71 | 0.9352 | 1          | 0.9352 | 0 | 0 | 0 | 1 Ref      |
| MT270409 | Unassigned | Unassigned | Unassigned | 977_1   | Clustered           | 2 VC_977_1   | 2  | 0.079  | 0.93977186 | 0.0743 | 0 | 0 | 0 | 1 Ref      |
| MT276994 | Unassigned | Unassigned | Unassigned | 1189_0  | Clustered           | 9 VC_1189_0  | 9  | 0.968  | 1          | 0.968  | 0 | 0 | 0 | 1 Ref      |
| MT310850 | Unassigned | Unassigned | Unassigned | 799_1   | Clustered           | 27 VC_799_1  | 27 | 0.8611 | 1          | 0.8611 | 0 | 0 | 0 | 1 Ref      |
| MT310851 | Unassigned | Unassigned | Unassigned | 1240_0  | Clustered           | 82 VC_1240_0 | 82 | 0.7945 | 1          | 0.7945 | 0 | 0 | 0 | 1 Ref      |
| MT310852 | Unassigned | Unassigned | Unassigned | 872_0   | Clustered           | 31 VC_872_0  | 31 | 0.8151 | 1          | 0.8151 | 0 | 0 | 0 | 0.8194 Ref |
| MT310853 | Unassigned | Unassigned | Unassigned | 1234_0  | Clustered           | 44 VC_1234_0 | 44 | 1      | 1          | 1      | 0 | 0 | 0 | 1 Ref      |
| MT310854 | Unassigned | Unassigned | Unassigned | 872_0   | Clustered           | 31 VC_872_0  | 31 | 0.8151 | 1          | 0.8151 | 0 | 0 | 0 | 0.8194 Ref |
| MT310855 | Unassigned | Unassigned | Unassigned | 1162_0  | Clustered           | 10 VC_1162_0 | 10 | 0.5715 | 1          | 0.5715 | 0 | 0 | 0 | 1 Ref      |
| MT310856 | Unassigned | Unassigned | Unassigned | 1240_0  | Clustered           | 82 VC_1240_0 | 82 | 0.7945 | 1          | 0.7945 | 0 | 0 | 0 | 1 Ref      |
| MT310858 | Unassigned | Unassigned | Unassigned | 216_7   | Clustered/Singleton | 1 VC_216_7   | 1  | 0      | 1          | 0      | 0 | 0 | 0 | 1 Ref      |
| MT310859 | Unassigned | Unassigned | Unassigned | 237_3   | Clustered           | 8 VC_237_3   | 8  | 0.1092 | 1          | 0.1092 | 0 | 0 | 0 | 1 Ref      |
| MT310860 | Unassigned | Unassigned | Unassigned | 237_3   | Clustered           | 8 VC_237_3   | 8  | 0.1092 | 1          | 0.1092 | 0 | 0 | 0 | 1 Ref      |
| MT310861 | Unassigned | Unassigned | Unassigned | 1240_0  | Clustered           | 82 VC_1240_0 | 82 | 0.7945 | 1          | 0.7945 | 0 | 0 | 0 | 1 Ref      |
| MT310863 | Unassigned | Unassigned | Unassigned | 981_1   | Clustered           | 26 VC_981_1  | 26 | 0.7009 | 1          | 0.7009 | 0 | 0 | 0 | 1 Ref      |
| MT310864 | Unassigned | Unassigned | Unassigned | 1344_0  | Clustered           | 78 VC_1344_0 | 78 | 0.9732 | 1          | 0.9732 | 0 | 0 | 0 | 1 Ref      |
| MT310865 | Unassigned | Unassigned | Unassigned | 1071_2  | Clustered           | 5 VC_1071_2  | 5  | 0.0534 | 0.99997362 | 0.0534 | 0 | 0 | 0 | 0.9 Ref    |
| MT310866 | Unassigned | Unassigned | Unassigned | 1240_0  | Clustered           | 82 VC_1240_0 | 82 | 0.7945 | 1          | 0.7945 | 0 | 0 | 0 | 1 Ref      |
| MT310867 | Unassigned | Unassigned | Unassigned | 371_12  | Clustered           | 4 VC_371_12  | 4  | 0.0126 | 0.99998489 | 0.0126 | 0 | 0 | 0 | 0.8333 Ref |
| MT310868 | Unassigned | Unassigned | Unassigned | 371_11  | Clustered           | 31 VC_371_11 | 31 | 0.0927 | 1          | 0.0927 | 0 | 0 | 0 | 0.7011 Ref |
| MT310869 | Unassigned | Unassigned | Unassigned | 1360_0  | Clustered           | 31 VC_1360_0 | 31 | 0.8837 | 1          | 0.8837 | 0 | 0 | 0 | 1 Ref      |
| MT310870 | Unassigned | Unassigned | Unassigned | 372_0   | Clustered           | 24 VC_372_0  | 24 | 0.5539 | 1          | 0.5539 | 0 | 0 | 0 | 1 Ref      |



|          |            |            |            |        |                     |              |     |        |            |        |   |   |   |            |
|----------|------------|------------|------------|--------|---------------------|--------------|-----|--------|------------|--------|---|---|---|------------|
| MT310871 | Unassigned | Unassigned | Unassigned | 509_0  | Clustered           | 37 VC_509_0  | 37  | 0.9689 | 1          | 0.9689 | 0 | 0 | 0 | 1 Ref      |
| MT310872 | Unassigned | Unassigned | Unassigned | 1178_0 | Clustered           | 24 VC_1178_0 | 24  | 0.9524 | 1          | 0.9524 | 0 | 0 | 0 | 1 Ref      |
| MT310873 | Unassigned | Unassigned | Unassigned | 1240_0 | Clustered           | 82 VC_1240_0 | 82  | 0.7945 | 1          | 0.7945 | 0 | 0 | 0 | 1 Ref      |
| MT310874 | Unassigned | Unassigned | Unassigned | 857_0  | Clustered           | 11 VC_857_0  | 11  | 0.9712 | 1          | 0.9712 | 0 | 0 | 0 | 1 Ref      |
| MT310875 | Unassigned | Unassigned | Unassigned | 1360_0 | Clustered           | 31 VC_1360_0 | 31  | 0.8837 | 1          | 0.8837 | 0 | 0 | 0 | 1 Ref      |
| MT310876 | Unassigned | Unassigned | Unassigned | 215_1  | Clustered           | 19 VC_215_1  | 19  | 0.4188 | 1          | 0.4188 | 0 | 0 | 0 | 1 Ref      |
| MT310877 | Unassigned | Unassigned | Unassigned | 216_6  | Clustered           | 42 VC_216_6  | 42  | 0.473  | 1          | 0.473  | 0 | 0 | 0 | 0.8351 Ref |
| MT310878 | Unassigned | Unassigned | Unassigned | 513_0  | Clustered           | 32 VC_513_0  | 32  | 0.6881 | 1          | 0.6881 | 0 | 0 | 0 | 1 Ref      |
| MT310879 | Unassigned | Unassigned | Unassigned | 513_0  | Clustered           | 32 VC_513_0  | 32  | 0.6881 | 1          | 0.6881 | 0 | 0 | 0 | 1 Ref      |
| MT310880 | Unassigned | Unassigned | Unassigned | 513_0  | Clustered           | 32 VC_513_0  | 32  | 0.6881 | 1          | 0.6881 | 0 | 0 | 0 | 1 Ref      |
| MT310881 | Unassigned | Unassigned | Unassigned | 513_0  | Clustered           | 32 VC_513_0  | 32  | 0.6881 | 1          | 0.6881 | 0 | 0 | 0 | 1 Ref      |
| MT310882 | Unassigned | Unassigned | Unassigned | 234_0  | Clustered           | 21 VC_234_0  | 21  | 0.8355 | 1          | 0.8355 | 0 | 0 | 0 | 1 Ref      |
| MT310883 | Unassigned | Unassigned | Unassigned | 215_1  | Clustered           | 19 VC_215_1  | 19  | 0.4188 | 1          | 0.4188 | 0 | 0 | 0 | 1 Ref      |
| MT310884 | Unassigned | Unassigned | Unassigned | 215_1  | Clustered           | 19 VC_215_1  | 19  | 0.4188 | 1          | 0.4188 | 0 | 0 | 0 | 1 Ref      |
| MT310885 | Unassigned | Unassigned | Unassigned | 215_1  | Clustered           | 19 VC_215_1  | 19  | 0.4188 | 1          | 0.4188 | 0 | 0 | 0 | 1 Ref      |
| MT310886 | Unassigned | Unassigned | Unassigned | 216_6  | Clustered           | 42 VC_216_6  | 42  | 0.473  | 1          | 0.473  | 0 | 0 | 0 | 0.8351 Ref |
| MT310887 | Unassigned | Unassigned | Unassigned | 1360_0 | Clustered           | 31 VC_1360_0 | 31  | 0.8837 | 1          | 0.8837 | 0 | 0 | 0 | 1 Ref      |
| MT310888 | Unassigned | Unassigned | Unassigned | 1360_0 | Clustered           | 31 VC_1360_0 | 31  | 0.8837 | 1          | 0.8837 | 0 | 0 | 0 | 1 Ref      |
| MT310889 | Unassigned | Unassigned | Unassigned | 1360_0 | Clustered           | 31 VC_1360_0 | 31  | 0.8837 | 1          | 0.8837 | 0 | 0 | 0 | 1 Ref      |
| MT310890 | Unassigned | Unassigned | Unassigned | 1360_0 | Clustered           | 31 VC_1360_0 | 31  | 0.8837 | 1          | 0.8837 | 0 | 0 | 0 | 1 Ref      |
| MT310891 | Unassigned | Unassigned | Unassigned | 1360_0 | Clustered           | 31 VC_1360_0 | 31  | 0.8837 | 1          | 0.8837 | 0 | 0 | 0 | 1 Ref      |
| MT310892 | Unassigned | Unassigned | Unassigned | 509_0  | Clustered           | 37 VC_509_0  | 37  | 0.9689 | 1          | 0.9689 | 0 | 0 | 0 | 1 Ref      |
| MT310893 | Unassigned | Unassigned | Unassigned | 520_38 | Clustered           | 6 VC_520_38  | 6   | 0.0519 | 1          | 0.0519 | 0 | 0 | 0 | 0.8667 Ref |
| MT310895 | Unassigned | Unassigned | Unassigned | 1073_0 | Clustered           | 24 VC_1073_0 | 24  | 0.8388 | 1          | 0.8388 | 0 | 0 | 0 | 1 Ref      |
| MT310896 | Unassigned | Unassigned | Unassigned | 1234_0 | Clustered           | 44 VC_1234_0 | 44  | 1      | 1          | 1      | 0 | 0 | 0 | 1 Ref      |
| MT310897 | Unassigned | Unassigned | Unassigned | 325_5  | Clustered           | 11 VC_325_5  | 11  | 0.047  | 1          | 0.047  | 0 | 0 | 0 | 0.7636 Ref |
| MT310898 | Unassigned | Unassigned | Unassigned | 1158_1 | Clustered           | 2 VC_1158_1  | 2   | 0.1372 | 0.89820314 | 0.1233 | 0 | 0 | 0 | 1 Ref      |
| MT311645 | Unassigned | Unassigned | Unassigned | 190_23 | Clustered           | 10 VC_190_23 | 10  | 0.0704 | 1          | 0.0704 | 0 | 0 | 0 | 0.8444 Ref |
| MT316458 | Unassigned | Unassigned | Unassigned | 1344_0 | Clustered           | 78 VC_1344_0 | 78  | 0.9732 | 1          | 0.9732 | 0 | 0 | 0 | 1 Ref      |
| MT316459 | Unassigned | Unassigned | Unassigned | 1344_0 | Clustered           | 78 VC_1344_0 | 78  | 0.9732 | 1          | 0.9732 | 0 | 0 | 0 | 1 Ref      |
| MT316460 | Unassigned | Unassigned | Unassigned | 371_11 | Clustered           | 31 VC_371_11 | 31  | 0.0927 | 1          | 0.0927 | 0 | 0 | 0 | 0.7011 Ref |
| MT316461 | Unassigned | Unassigned | Unassigned | 728_0  | Clustered           | 3 VC_728_0   | 3   | 0.4017 | 0.99850259 | 0.4011 | 0 | 0 | 0 | 1 Ref      |
| MT316462 | Unassigned | Unassigned | Unassigned | 1344_0 | Clustered           | 78 VC_1344_0 | 78  | 0.9732 | 1          | 0.9732 | 0 | 0 | 0 | 1 Ref      |
| MT316463 | Unassigned | Unassigned | Unassigned | 371_11 | Clustered           | 31 VC_371_11 | 31  | 0.0927 | 1          | 0.0927 | 0 | 0 | 0 | 0.7011 Ref |
| MT322327 | Unassigned | Unassigned | Unassigned | 329_17 | Clustered           | 4 VC_329_17  | 4   | 0.0163 | 0.99996247 | 0.0163 | 0 | 0 | 0 | 1 Ref      |
| MT325768 | Unassigned | Unassigned | Unassigned | 211_3  | Clustered/Singleton | 1 VC_211_3   | 1   | 0      | 0          | 0      | 0 | 0 | 0 | 1 Ref      |
| MT331608 | Unassigned | Unassigned | Unassigned | 835_0  | Clustered           | 67 VC_835_0  | 67  | 0.9624 | 1          | 0.9624 | 0 | 0 | 0 | 1 Ref      |
| MT334653 | Unassigned | Unassigned | Unassigned | 669_1  | Clustered           | 10 VC_669_1  | 10  | 0.1268 | 1          | 0.1268 | 0 | 0 | 0 | 0.9778 Ref |
| MT338525 | Unassigned | Unassigned | Unassigned | 149_8  | Clustered           | 66 VC_149_8  | 66  | 0.4565 | 1          | 0.4565 | 0 | 0 | 0 | 0.8182 Ref |
| MT341500 | Unassigned | Unassigned | Unassigned | 669_0  | Clustered           | 21 VC_669_0  | 21  | 0.3623 | 1          | 0.3623 | 0 | 0 | 0 | 1 Ref      |
| MT344103 | Unassigned | Unassigned | Unassigned | 1188_0 | Clustered           | 3 VC_1188_0  | 3   | 0.9001 | 0.9944138  | 0.8951 | 0 | 0 | 0 | 1 Ref      |
| MT344104 | Unassigned | Unassigned | Unassigned | 1188_0 | Clustered           | 3 VC_1188_0  | 3   | 0.9001 | 0.9944138  | 0.8951 | 0 | 0 | 0 | 1 Ref      |
| MT344105 | Unassigned | Unassigned | Unassigned | 1188_0 | Clustered           | 3 VC_1188_0  | 3   | 0.9001 | 0.9944138  | 0.8951 | 0 | 0 | 0 | 1 Ref      |
| MT349888 | Unassigned | Unassigned | Unassigned | 79_0   | Clustered           | 64 VC_79_0   | 64  | 0.4185 | 1          | 0.4185 | 0 | 0 | 0 | 0.7649 Ref |
| MT350292 | Unassigned | Unassigned | Unassigned | 451_0  | Clustered           | 80 VC_451_0  | 80  | 0.9991 | 1          | 0.9991 | 0 | 0 | 0 | 1 Ref      |
| MT350293 | Unassigned | Unassigned | Unassigned | 392_0  | Clustered           | 126 VC_392_0 | 126 | 0.9621 | 1          | 0.9621 | 0 | 0 | 0 | 1 Ref      |
| MT354569 | Unassigned | Unassigned | Unassigned | 725_0  | Clustered           | 4 VC_725_0   | 4   | 0.4268 | 0.99997355 | 0.4268 | 0 | 0 | 0 | 1 Ref      |
| MT354570 | Unassigned | Unassigned | Unassigned | 155_0  | Clustered           | 14 VC_155_0  | 14  | 0.6095 | 1          | 0.6095 | 0 | 0 | 0 | 1 Ref      |
| MT360680 | Unassigned | Unassigned | Unassigned | 111_0  | Clustered           | 91 VC_111_0  | 91  | 0.9587 | 1          | 0.9587 | 0 | 0 | 0 | 1 Ref      |
| MT360681 | Unassigned | Unassigned | Unassigned | 941_0  | Clustered           | 40 VC_941_0  | 40  | 0.6903 | 1          | 0.6903 | 0 | 0 | 0 | 1 Ref      |
| MT361768 | Unassigned | Unassigned | Unassigned | 162_0  | Clustered           | 18 VC_162_0  | 18  | 0.7403 | 1          | 0.7403 | 0 | 0 | 0 | 0.8627 Ref |
| MT361972 | Unassigned | Unassigned | Unassigned | 696_1  | Clustered           | 8 VC_696_1   | 8   | 0.5452 | 1          | 0.5452 | 0 | 0 | 0 | 0.9286 Ref |
| MT366568 | Unassigned | Unassigned | Unassigned | 8_0    | Clustered           | 58 VC_8_0    | 58  | 0.8306 | 1          | 0.8306 | 0 | 0 | 0 | 0.9946 Ref |
| MT366580 | Unassigned | Unassigned | Unassigned | 231_0  | Clustered           | 3 VC_231_0   | 3   | 0.236  | 0.99824503 | 0.2356 | 0 | 0 | 0 | 1 Ref      |
| MT366760 | Unassigned | Unassigned | Unassigned | 65_0   | Clustered           | 2 VC_65_0    | 2   | 0.1825 | 0.9555882  | 0.1744 | 0 | 0 | 0 | 1 Ref      |
| MT366761 | Unassigned | Unassigned | Unassigned | 65_0   | Clustered           | 2 VC_65_0    | 2   | 0.1825 | 0.9555882  | 0.1744 | 0 | 0 | 0 | 1 Ref      |
| MT366762 | Unassigned | Unassigned | Unassigned | 136_0  | Clustered           | 2 VC_136_0   | 2   | 0.0412 | 0.95741268 | 0.0394 | 0 | 0 | 0 | 1 Ref      |
| MT366931 | Unassigned | Unassigned | Unassigned | 450_0  | Clustered           | 16 VC_450_0  | 16  | 0.9564 | 1          | 0.9564 | 0 | 0 | 0 | 1 Ref      |
| MT366932 | Unassigned | Unassigned | Unassigned | 450_0  | Clustered           | 16 VC_450_0  | 16  | 0.9564 | 1          | 0.9564 | 0 | 0 | 0 | 1 Ref      |
| MT366933 | Unassigned | Unassigned | Unassigned | 450_0  | Clustered           | 16 VC_450_0  | 16  | 0.9564 | 1          | 0.9564 | 0 | 0 | 0 | 1 Ref      |
| MT366934 | Unassigned | Unassigned | Unassigned | 450_0  | Clustered           | 16 VC_450_0  | 16  | 0.9564 | 1          | 0.9564 | 0 | 0 | 0 | 1 Ref      |
| MT366935 | Unassigned | Unassigned | Unassigned | 450_0  | Clustered           | 16 VC_450_0  | 16  | 0.9564 | 1          | 0.9564 | 0 | 0 | 0 | 1 Ref      |
| MT366936 | Unassigned | Unassigned | Unassigned | 450_0  | Clustered           | 16 VC_450_0  | 16  | 0.9564 | 1          | 0.9564 | 0 | 0 | 0 | 1 Ref      |
| MT366937 | Unassigned | Unassigned | Unassigned | 450_0  | Clustered           | 16 VC_450_0  | 16  | 0.9564 | 1          | 0.9564 | 0 | 0 | 0 | 1 Ref      |
| MT366938 | Unassigned | Unassigned | Unassigned | 450_0  | Clustered           | 16 VC_450_0  | 16  | 0.9564 | 1          | 0.9564 | 0 | 0 | 0 | 1 Ref      |
| MT366939 | Unassigned | Unassigned | Unassigned | 450_0  | Clustered           | 16 VC_450_0  | 16  | 0.9564 | 1          | 0.9564 | 0 | 0 | 0 | 1 Ref      |
| MT366940 | Unassigned | Unassigned | Unassigned | 450_0  | Clustered           | 16 VC_450_0  | 16  | 0.9564 | 1          | 0.9564 | 0 | 0 | 0 | 1 Ref      |
| MT366941 | Unassigned | Unassigned | Unassigned | 450_0  | Clustered           | 16 VC_450_0  | 16  | 0.9564 | 1          | 0.9564 | 0 | 0 | 0 | 1 Ref      |
| MT366942 | Unassigned | Unassigned | Unassigned | 450_0  | Clustered           | 16 VC_450_0  | 16  | 0.9564 | 1          | 0.9564 | 0 | 0 | 0 | 1 Ref      |
| MT366943 | Unassigned | Unassigned | Unassigned | 450_0  | Clustered           | 16 VC_450_0  | 16  | 0.9564 | 1          | 0.9564 | 0 | 0 | 0 | 1 Ref      |
| MT366944 | Unassigned | Unassigned | Unassigned | 450_0  | Clustered           | 16 VC_450_0  | 16  | 0.9564 | 1          | 0.9564 | 0 | 0 | 0 | 1 Ref      |
| MT366945 | Unassigned | Unassigned | Unassigned | 89_2   | Clustered           | 5 VC_89_2    | 5   | 0.2033 | 0.99999643 | 0.2033 | 0 | 0 | 0 | 1 Ref      |
| MT366946 | Unassigned | Unassigned | Unassigned | 89_2   | Clustered           | 5 VC_89_2    | 5   | 0.2033 | 0.99999643 | 0.2033 | 0 | 0 | 0 | 1 Ref      |
| MT366947 | Unassigned | Unassigned | Unassigned | 89_2   | Clustered           | 5 VC_89_2    | 5   | 0.2033 | 0.99999643 | 0.2033 | 0 | 0 | 0 | 1 Ref      |
| MT366948 | Unassigned | Unassigned | Unassigned | 89_2   | Clustered           | 5 VC_89_2    | 5   | 0.2033 | 0.99999643 | 0.2033 | 0 | 0 | 0 | 1 Ref      |
| MT374852 | Unassigned | Unassigned | Unassigned | 50_0   | Clustered           | 9 VC_50_0    | 9   | 0.5531 | 1          | 0.5531 | 0 | 0 | 0 | 1 Ref      |
| MT374853 | Unassigned | Unassigned | Unassigned | 50_0   | Clustered           | 9 VC_50_0    | 9   | 0.5531 | 1          | 0.5531 | 0 | 0 | 0 | 1 Ref      |
| MT374854 | Unassigned | Unassigned | Unassigned | 50_0   | Clustered           | 9 VC_50_0    | 9   | 0.5531 | 1          | 0.5531 | 0 | 0 | 0 | 1 Ref      |
| MT374855 | Unassigned | Unassigned | Unassigned | 228_0  | Clustered           | 60 VC_228_0  | 60  | 0.942  | 1          | 0.942  | 0 | 0 | 0 | 1 Ref      |
| MT374856 | Unassigned | Unassigned | Unassigned | 50_0   | Clustered           | 9 VC_50_0    | 9   | 0.5531 | 1          | 0.5531 | 0 | 0 | 0 | 1 Ref      |
| MT374857 | Unassigned | Unassigned | Unassigned | 228_0  | Clustered           | 60 VC_228_0  | 60  | 0.942  | 1          | 0.942  | 0 | 0 | 0 | 1 Ref      |



|          |            |            |            |        |                     |              |     |        |            |        |   |   |   |            |
|----------|------------|------------|------------|--------|---------------------|--------------|-----|--------|------------|--------|---|---|---|------------|
| MT374858 | Unassigned | Unassigned | Unassigned | 228_0  | Clustered           | 60 VC_228_0  | 60  | 0.942  | 1          | 0.942  | 0 | 0 | 0 | 1 Ref      |
| MT374859 | Unassigned | Unassigned | Unassigned | 386_0  | Clustered           | 49 VC_386_0  | 49  | 0.7941 | 1          | 0.7941 | 0 | 0 | 0 | 1 Ref      |
| MT375042 | Unassigned | Unassigned | Unassigned | 125_0  | Clustered           | 17 VC_125_0  | 17  | 0.9244 | 1          | 0.9244 | 0 | 0 | 0 | 1 Ref      |
| MT375519 | Unassigned | Unassigned | Unassigned | 487_0  | Clustered           | 2 VC_487_0   | 2   | 0.2529 | 0.94924918 | 0.2401 | 0 | 0 | 0 | 1 Ref      |
| MT375520 | Unassigned | Unassigned | Unassigned | 480_0  | Clustered           | 19 VC_480_0  | 19  | 0.5445 | 1          | 0.5445 | 0 | 0 | 0 | 1 Ref      |
| MT375521 | Unassigned | Unassigned | Unassigned | 480_0  | Clustered           | 19 VC_480_0  | 19  | 0.5445 | 1          | 0.5445 | 0 | 0 | 0 | 1 Ref      |
| MT375525 | Unassigned | Unassigned | Unassigned | 486_0  | Clustered           | 18 VC_486_0  | 18  | 0.887  | 1          | 0.887  | 0 | 0 | 0 | 1 Ref      |
| MT375526 | Unassigned | Unassigned | Unassigned | 480_0  | Clustered           | 19 VC_480_0  | 19  | 0.5445 | 1          | 0.5445 | 0 | 0 | 0 | 1 Ref      |
| MT375527 | Unassigned | Unassigned | Unassigned | 480_0  | Clustered           | 19 VC_480_0  | 19  | 0.5445 | 1          | 0.5445 | 0 | 0 | 0 | 1 Ref      |
| MT375528 | Unassigned | Unassigned | Unassigned | 480_0  | Clustered           | 19 VC_480_0  | 19  | 0.5445 | 1          | 0.5445 | 0 | 0 | 0 | 1 Ref      |
| MT375529 | Unassigned | Unassigned | Unassigned | 487_0  | Clustered           | 2 VC_487_0   | 2   | 0.2529 | 0.94924918 | 0.2401 | 0 | 0 | 0 | 1 Ref      |
| MT375530 | Unassigned | Unassigned | Unassigned | 480_0  | Clustered           | 19 VC_480_0  | 19  | 0.5445 | 1          | 0.5445 | 0 | 0 | 0 | 1 Ref      |
| MT375531 | Unassigned | Unassigned | Unassigned | 480_0  | Clustered           | 19 VC_480_0  | 19  | 0.5445 | 1          | 0.5445 | 0 | 0 | 0 | 1 Ref      |
| MT380195 | Unassigned | Unassigned | Unassigned | 192_0  | Clustered           | 15 VC_192_0  | 15  | 0.5071 | 1          | 0.5071 | 0 | 0 | 0 | 1 Ref      |
| MT385367 | Unassigned | Unassigned | Unassigned | 492_1  | Clustered           | 20 VC_492_1  | 20  | 0.4176 | 1          | 0.4176 | 0 | 0 | 0 | 1 Ref      |
| MT408532 | Unassigned | Unassigned | Unassigned | 432_4  | Clustered/Singleton | 1 VC_432_4   | 1   | 0      | 1          | 0      | 0 | 0 | 0 | 1 Ref      |
| MT409116 | Unassigned | Unassigned | Unassigned | 492_1  | Clustered           | 20 VC_492_1  | 20  | 0.4176 | 1          | 0.4176 | 0 | 0 | 0 | 1 Ref      |
| MT409176 | Unassigned | Unassigned | Unassigned | 329_16 | Clustered           | 4 VC_329_16  | 4   | 0.0158 | 0.9999807  | 0.0158 | 0 | 0 | 0 | 1 Ref      |
| MT411892 | Unassigned | Unassigned | Unassigned | 149_9  | Clustered           | 3 VC_149_9   | 3   | 0.0084 | 0.97854556 | 0.0082 | 0 | 0 | 0 | 1 Ref      |
| MT413450 | Unassigned | Unassigned | Unassigned | 79_0   | Clustered           | 64 VC_79_0   | 64  | 0.4185 | 1          | 0.4185 | 0 | 0 | 0 | 0.7649 Ref |
| MT416090 | Unassigned | Unassigned | Unassigned | 839_0  | Clustered           | 5 VC_839_0   | 5   | 0.165  | 0.99999995 | 0.165  | 0 | 0 | 0 | 1 Ref      |
| MT419366 | Unassigned | Unassigned | Unassigned | 385_0  | Clustered           | 51 VC_385_0  | 51  | 0.8754 | 1          | 0.8754 | 0 | 0 | 0 | 1 Ref      |
| MT422786 | Unassigned | Unassigned | Unassigned | 100_0  | Clustered           | 15 VC_100_0  | 15  | 0.6536 | 1          | 0.6536 | 0 | 0 | 0 | 1 Ref      |
| MT423823 | Unassigned | Unassigned | Unassigned | 11_0   | Clustered           | 19 VC_11_0   | 19  | 0.7562 | 1          | 0.7562 | 0 | 0 | 0 | 1 Ref      |
| MT423824 | Unassigned | Unassigned | Unassigned | 11_0   | Clustered           | 19 VC_11_0   | 19  | 0.7562 | 1          | 0.7562 | 0 | 0 | 0 | 1 Ref      |
| MT424636 | Unassigned | Unassigned | Unassigned | 340_0  | Clustered           | 31 VC_340_0  | 31  | 0.9549 | 1          | 0.9549 | 0 | 0 | 0 | 1 Ref      |
| MT425185 | Unassigned | Unassigned | Unassigned | 823_0  | Clustered           | 124 VC_823_0 | 124 | 0.9492 | 1          | 0.9492 | 0 | 0 | 0 | 1 Ref      |
| MT426122 | Unassigned | Unassigned | Unassigned | 1174_0 | Clustered           | 4 VC_1174_0  | 4   | 1      | 1          | 1      | 0 | 0 | 0 | 1 Ref      |
| MT427400 | Unassigned | Unassigned | Unassigned | 575_0  | Clustered           | 35 VC_575_0  | 35  | 0.8815 | 1          | 0.8815 | 0 | 0 | 0 | 1 Ref      |
| MT430910 | Unassigned | Unassigned | Unassigned | 463_0  | Clustered           | 4 VC_463_0   | 4   | 0.7906 | 0.99997156 | 0.7906 | 0 | 0 | 0 | 1 Ref      |
| MT431535 | Unassigned | Unassigned | Unassigned | 912_0  | Clustered           | 76 VC_912_0  | 76  | 0.979  | 1          | 0.979  | 0 | 0 | 0 | 1 Ref      |
| MT438396 | Unassigned | Unassigned | Unassigned | 582_3  | Clustered           | 12 VC_582_3  | 12  | 0.2357 | 1          | 0.2357 | 0 | 0 | 0 | 0.8636 Ref |
| MT438761 | Unassigned | Unassigned | Unassigned | 739_0  | Clustered           | 26 VC_739_0  | 26  | 0.9571 | 1          | 0.9571 | 0 | 0 | 0 | 1 Ref      |
| MT442039 | Unassigned | Unassigned | Unassigned | 972_0  | Clustered           | 6 VC_972_0   | 6   | 0.2892 | 1          | 0.2892 | 0 | 0 | 0 | 1 Ref      |
| MT446386 | Unassigned | Unassigned | Unassigned | 813_1  | Clustered           | 24 VC_813_1  | 24  | 0.535  | 1          | 0.535  | 0 | 0 | 0 | 1 Ref      |
| MT446387 | Unassigned | Unassigned | Unassigned | 283_61 | Clustered/Singleton | 1 VC_283_61  | 1   | 0      | 1          | 0      | 0 | 0 | 0 | 1 Ref      |
| MT446388 | Unassigned | Unassigned | Unassigned | 329_7  | Clustered           | 18 VC_329_7  | 18  | 0.0938 | 1          | 0.0938 | 0 | 0 | 0 | 0.7778 Ref |
| MT446389 | Unassigned | Unassigned | Unassigned | 835_0  | Clustered           | 67 VC_835_0  | 67  | 0.9624 | 1          | 0.9624 | 0 | 0 | 0 | 1 Ref      |
| MT446390 | Unassigned | Unassigned | Unassigned | 286_10 | Clustered           | 9 VC_286_10  | 9   | 0.0615 | 0.99999878 | 0.0615 | 0 | 0 | 0 | 0.6667 Ref |
| MT446391 | Unassigned | Unassigned | Unassigned | 835_0  | Clustered           | 67 VC_835_0  | 67  | 0.9624 | 1          | 0.9624 | 0 | 0 | 0 | 1 Ref      |
| MT446392 | Unassigned | Unassigned | Unassigned | 290_3  | Clustered           | 2 VC_290_3   | 2   | 0.0102 | 0.92273843 | 0.0094 | 0 | 0 | 0 | 1 Ref      |
| MT446393 | Unassigned | Unassigned | Unassigned | 451_0  | Clustered           | 80 VC_451_0  | 80  | 0.9991 | 1          | 0.9991 | 0 | 0 | 0 | 1 Ref      |
| MT446394 | Unassigned | Unassigned | Unassigned | 451_0  | Clustered           | 80 VC_451_0  | 80  | 0.9991 | 1          | 0.9991 | 0 | 0 | 0 | 1 Ref      |
| MT446396 | Unassigned | Unassigned | Unassigned | 290_0  | Clustered           | 10 VC_290_0  | 10  | 0.0981 | 1          | 0.0981 | 0 | 0 | 0 | 1 Ref      |
| MT446397 | Unassigned | Unassigned | Unassigned | 792_0  | Clustered           | 35 VC_792_0  | 35  | 0.9828 | 1          | 0.9828 | 0 | 0 | 0 | 1 Ref      |
| MT446398 | Unassigned | Unassigned | Unassigned | 792_0  | Clustered           | 35 VC_792_0  | 35  | 0.9828 | 1          | 0.9828 | 0 | 0 | 0 | 1 Ref      |
| MT446399 | Unassigned | Unassigned | Unassigned | 792_0  | Clustered           | 35 VC_792_0  | 35  | 0.9828 | 1          | 0.9828 | 0 | 0 | 0 | 1 Ref      |
| MT446400 | Unassigned | Unassigned | Unassigned | 792_0  | Clustered           | 35 VC_792_0  | 35  | 0.9828 | 1          | 0.9828 | 0 | 0 | 0 | 1 Ref      |
| MT446402 | Unassigned | Unassigned | Unassigned | 792_0  | Clustered           | 35 VC_792_0  | 35  | 0.9828 | 1          | 0.9828 | 0 | 0 | 0 | 1 Ref      |
| MT446403 | Unassigned | Unassigned | Unassigned | 792_0  | Clustered           | 35 VC_792_0  | 35  | 0.9828 | 1          | 0.9828 | 0 | 0 | 0 | 1 Ref      |
| MT446405 | Unassigned | Unassigned | Unassigned | 618_0  | Clustered           | 13 VC_618_0  | 13  | 0.6252 | 1          | 0.6252 | 0 | 0 | 0 | 1 Ref      |
| MT446406 | Unassigned | Unassigned | Unassigned | 792_0  | Clustered           | 35 VC_792_0  | 35  | 0.9828 | 1          | 0.9828 | 0 | 0 | 0 | 1 Ref      |
| MT446407 | Unassigned | Unassigned | Unassigned | 813_0  | Clustered           | 12 VC_813_0  | 12  | 0.2347 | 1          | 0.2347 | 0 | 0 | 0 | 1 Ref      |
| MT446408 | Unassigned | Unassigned | Unassigned | 618_0  | Clustered           | 13 VC_618_0  | 13  | 0.6252 | 1          | 0.6252 | 0 | 0 | 0 | 1 Ref      |
| MT446409 | Unassigned | Unassigned | Unassigned | 792_0  | Clustered           | 35 VC_792_0  | 35  | 0.9828 | 1          | 0.9828 | 0 | 0 | 0 | 1 Ref      |
| MT446410 | Unassigned | Unassigned | Unassigned | 813_1  | Clustered           | 24 VC_813_1  | 24  | 0.535  | 1          | 0.535  | 0 | 0 | 0 | 1 Ref      |
| MT446411 | Unassigned | Unassigned | Unassigned | 290_0  | Clustered           | 10 VC_290_0  | 10  | 0.0981 | 1          | 0.0981 | 0 | 0 | 0 | 1 Ref      |
| MT446412 | Unassigned | Unassigned | Unassigned | 290_0  | Clustered           | 10 VC_290_0  | 10  | 0.0981 | 1          | 0.0981 | 0 | 0 | 0 | 1 Ref      |
| MT446413 | Unassigned | Unassigned | Unassigned | 813_0  | Clustered           | 12 VC_813_0  | 12  | 0.2347 | 1          | 0.2347 | 0 | 0 | 0 | 1 Ref      |
| MT446414 | Unassigned | Unassigned | Unassigned | 813_0  | Clustered           | 12 VC_813_0  | 12  | 0.2347 | 1          | 0.2347 | 0 | 0 | 0 | 1 Ref      |
| MT446415 | Unassigned | Unassigned | Unassigned | 290_0  | Clustered           | 10 VC_290_0  | 10  | 0.0981 | 1          | 0.0981 | 0 | 0 | 0 | 1 Ref      |
| MT446416 | Unassigned | Unassigned | Unassigned | 164_1  | Clustered/Singleton | 1 VC_164_1   | 1   | 0      | 1          | 0      | 0 | 0 | 0 | 1 Ref      |
| MT446417 | Unassigned | Unassigned | Unassigned | 823_0  | Clustered           | 124 VC_823_0 | 124 | 0.9492 | 1          | 0.9492 | 0 | 0 | 0 | 1 Ref      |
| MT446418 | Unassigned | Unassigned | Unassigned | 823_0  | Clustered           | 124 VC_823_0 | 124 | 0.9492 | 1          | 0.9492 | 0 | 0 | 0 | 1 Ref      |
| MT446419 | Unassigned | Unassigned | Unassigned | 792_0  | Clustered           | 35 VC_792_0  | 35  | 0.9828 | 1          | 0.9828 | 0 | 0 | 0 | 1 Ref      |
| MT446420 | Unassigned | Unassigned | Unassigned | 290_1  | Clustered           | 8 VC_290_1   | 8   | 0.0757 | 1          | 0.0757 | 0 | 0 | 0 | 0.8571 Ref |
| MT446421 | Unassigned | Unassigned | Unassigned | 290_0  | Clustered           | 10 VC_290_0  | 10  | 0.0981 | 1          | 0.0981 | 0 | 0 | 0 | 1 Ref      |
| MT446422 | Unassigned | Unassigned | Unassigned | 290_1  | Clustered           | 8 VC_290_1   | 8   | 0.0757 | 1          | 0.0757 | 0 | 0 | 0 | 0.8571 Ref |
| MT446423 | Unassigned | Unassigned | Unassigned | 286_5  | Clustered/Singleton | 1 VC_286_5   | 1   | 0      | 1          | 0      | 0 | 0 | 0 | 1 Ref      |
| MT448616 | Unassigned | Unassigned | Unassigned | 971_1  | Clustered           | 24 VC_971_1  | 24  | 0.7393 | 1          | 0.7393 | 0 | 0 | 0 | 0.8913 Ref |
| MT448617 | Unassigned | Unassigned | Unassigned | 971_1  | Clustered           | 24 VC_971_1  | 24  | 0.7393 | 1          | 0.7393 | 0 | 0 | 0 | 0.8913 Ref |
| MT451873 | Unassigned | Unassigned | Unassigned | 904_1  | Clustered           | 4 VC_904_1   | 4   | 0.1486 | 0.99997723 | 0.1486 | 0 | 0 | 0 | 1 Ref      |
| MT451985 | Unassigned | Unassigned | Unassigned | 1240_0 | Clustered           | 82 VC_1240_0 | 82  | 0.7945 | 1          | 0.7945 | 0 | 0 | 0 | 1 Ref      |
| MT457475 | Unassigned | Unassigned | Unassigned | 777_0  | Clustered           | 3 VC_777_0   | 3   | 0.4763 | 0.9961812  | 0.4745 | 0 | 0 | 0 | 1 Ref      |
| MT457552 | Unassigned | Unassigned | Unassigned | 287_0  | Clustered           | 2 VC_287_0   | 2   | 0.0279 | 0.95771461 | 0.0267 | 0 | 0 | 0 | 1 Ref      |
| MT457553 | Unassigned | Unassigned | Unassigned | 287_0  | Clustered           | 2 VC_287_0   | 2   | 0.0279 | 0.95771461 | 0.0267 | 0 | 0 | 0 | 1 Ref      |
| MT459144 | Unassigned | Unassigned | Unassigned | 971_1  | Clustered           | 24 VC_971_1  | 24  | 0.7393 | 1          | 0.7393 | 0 | 0 | 0 | 0.8913 Ref |
| MT459794 | Unassigned | Unassigned | Unassigned | 817_0  | Clustered           | 14 VC_817_0  | 14  | 0.6342 | 1          | 0.6342 | 0 | 0 | 0 | 1 Ref      |
| MT460514 | Unassigned | Unassigned | Unassigned | 971_1  | Clustered           | 24 VC_971_1  | 24  | 0.7393 | 1          | 0.7393 | 0 | 0 | 0 | 0.8913 Ref |
| MT460515 | Unassigned | Unassigned | Unassigned | 971_1  | Clustered           | 24 VC_971_1  | 24  | 0.7393 | 1          | 0.7393 | 0 | 0 | 0 | 0.8913 Ref |
| MT460516 | Unassigned | Unassigned | Unassigned | 971_1  | Clustered           | 24 VC_971_1  | 24  | 0.7393 | 1          | 0.7393 | 0 | 0 | 0 | 0.8913 Ref |



|          |            |            |            |        |           |               |     |        |            |        |   |   |   |            |
|----------|------------|------------|------------|--------|-----------|---------------|-----|--------|------------|--------|---|---|---|------------|
| MT460517 | Unassigned | Unassigned | Unassigned | 971_1  | Clustered | 24 VC_971_1   | 24  | 0.7393 | 1          | 0.7393 | 0 | 0 | 0 | 0.8913 Ref |
| MT460518 | Unassigned | Unassigned | Unassigned | 971_1  | Clustered | 24 VC_971_1   | 24  | 0.7393 | 1          | 0.7393 | 0 | 0 | 0 | 0.8913 Ref |
| MT465573 | Unassigned | Unassigned | Unassigned | 394_0  | Clustered | 2 VC_394_0    | 2   | 0.0211 | 0.957922   | 0.0202 | 0 | 0 | 0 | 1 Ref      |
| MT478991 | Unassigned | Unassigned | Unassigned | 590_0  | Clustered | 27 VC_590_0   | 27  | 0.9947 | 1          | 0.9947 | 0 | 0 | 0 | 1 Ref      |
| MT478992 | Unassigned | Unassigned | Unassigned | 584_0  | Clustered | 28 VC_584_0   | 28  | 0.7704 | 1          | 0.7704 | 0 | 0 | 0 | 1 Ref      |
| MT478993 | Unassigned | Unassigned | Unassigned | 835_0  | Clustered | 67 VC_835_0   | 67  | 0.9624 | 1          | 0.9624 | 0 | 0 | 0 | 1 Ref      |
| MT490303 | Unassigned | Unassigned | Unassigned | 928_0  | Clustered | 3 VC_928_0    | 3   | 0.7844 | 0.9944138  | 0.78   | 0 | 0 | 0 | 1 Ref      |
| MT490373 | Unassigned | Unassigned | Unassigned | 517_1  | Clustered | 108 VC_517_1  | 108 | 0.8483 | 1          | 0.8483 | 0 | 0 | 0 | 0.9955 Ref |
| MT491204 | Unassigned | Unassigned | Unassigned | 79_6   | Clustered | 11 VC_79_6    | 11  | 0.0528 | 1          | 0.0528 | 0 | 0 | 0 | 0.7455 Ref |
| MT491205 | Unassigned | Unassigned | Unassigned | 79_6   | Clustered | 11 VC_79_6    | 11  | 0.0528 | 1          | 0.0528 | 0 | 0 | 0 | 0.7455 Ref |
| MT491206 | Unassigned | Unassigned | Unassigned | 79_6   | Clustered | 11 VC_79_6    | 11  | 0.0528 | 1          | 0.0528 | 0 | 0 | 0 | 0.7455 Ref |
| MT491207 | Unassigned | Unassigned | Unassigned | 631_0  | Clustered | 3 VC_631_0    | 3   | 0.1213 | 0.99819199 | 0.1211 | 0 | 0 | 0 | 1 Ref      |
| MT491208 | Unassigned | Unassigned | Unassigned | 631_0  | Clustered | 3 VC_631_0    | 3   | 0.1213 | 0.99819199 | 0.1211 | 0 | 0 | 0 | 1 Ref      |
| MT495635 | Unassigned | Unassigned | Unassigned | 54_0   | Clustered | 6 VC_54_0     | 6   | 0.6725 | 0.99999999 | 0.6725 | 0 | 0 | 0 | 1 Ref      |
| MT496969 | Unassigned | Unassigned | Unassigned | 451_0  | Clustered | 80 VC_451_0   | 80  | 0.9991 | 1          | 0.9991 | 0 | 0 | 0 | 1 Ref      |
| MT496970 | Unassigned | Unassigned | Unassigned | 847_1  | Clustered | 26 VC_847_1   | 26  | 0.6323 | 1          | 0.6323 | 0 | 0 | 0 | 0.9815 Ref |
| MT496971 | Unassigned | Unassigned | Unassigned | 452_0  | Clustered | 66 VC_452_0   | 66  | 0.9248 | 1          | 0.9248 | 0 | 0 | 0 | 1 Ref      |
| MT497017 | Unassigned | Unassigned | Unassigned | 1015_0 | Clustered | 62 VC_1015_0  | 62  | 0.9947 | 1          | 0.9947 | 0 | 0 | 0 | 1 Ref      |
| MT497065 | Unassigned | Unassigned | Unassigned | 1015_0 | Clustered | 62 VC_1015_0  | 62  | 0.9947 | 1          | 0.9947 | 0 | 0 | 0 | 1 Ref      |
| MT497066 | Unassigned | Unassigned | Unassigned | 1015_0 | Clustered | 62 VC_1015_0  | 62  | 0.9947 | 1          | 0.9947 | 0 | 0 | 0 | 1 Ref      |
| MT497067 | Unassigned | Unassigned | Unassigned | 1015_0 | Clustered | 62 VC_1015_0  | 62  | 0.9947 | 1          | 0.9947 | 0 | 0 | 0 | 1 Ref      |
| MT497068 | Unassigned | Unassigned | Unassigned | 1015_0 | Clustered | 62 VC_1015_0  | 62  | 0.9947 | 1          | 0.9947 | 0 | 0 | 0 | 1 Ref      |
| MT497069 | Unassigned | Unassigned | Unassigned | 1015_0 | Clustered | 62 VC_1015_0  | 62  | 0.9947 | 1          | 0.9947 | 0 | 0 | 0 | 1 Ref      |
| MT497070 | Unassigned | Unassigned | Unassigned | 1015_0 | Clustered | 62 VC_1015_0  | 62  | 0.9947 | 1          | 0.9947 | 0 | 0 | 0 | 1 Ref      |
| MT497071 | Unassigned | Unassigned | Unassigned | 1015_0 | Clustered | 62 VC_1015_0  | 62  | 0.9947 | 1          | 0.9947 | 0 | 0 | 0 | 1 Ref      |
| MT497072 | Unassigned | Unassigned | Unassigned | 1015_0 | Clustered | 62 VC_1015_0  | 62  | 0.9947 | 1          | 0.9947 | 0 | 0 | 0 | 1 Ref      |
| MT497073 | Unassigned | Unassigned | Unassigned | 1015_0 | Clustered | 62 VC_1015_0  | 62  | 0.9947 | 1          | 0.9947 | 0 | 0 | 0 | 1 Ref      |
| MT497074 | Unassigned | Unassigned | Unassigned | 1015_0 | Clustered | 62 VC_1015_0  | 62  | 0.9947 | 1          | 0.9947 | 0 | 0 | 0 | 1 Ref      |
| MT497075 | Unassigned | Unassigned | Unassigned | 1015_0 | Clustered | 62 VC_1015_0  | 62  | 0.9947 | 1          | 0.9947 | 0 | 0 | 0 | 1 Ref      |
| MT497076 | Unassigned | Unassigned | Unassigned | 1015_0 | Clustered | 62 VC_1015_0  | 62  | 0.9947 | 1          | 0.9947 | 0 | 0 | 0 | 1 Ref      |
| MT497077 | Unassigned | Unassigned | Unassigned | 1015_0 | Clustered | 62 VC_1015_0  | 62  | 0.9947 | 1          | 0.9947 | 0 | 0 | 0 | 1 Ref      |
| MT497078 | Unassigned | Unassigned | Unassigned | 1015_0 | Clustered | 62 VC_1015_0  | 62  | 0.9947 | 1          | 0.9947 | 0 | 0 | 0 | 1 Ref      |
| MT497079 | Unassigned | Unassigned | Unassigned | 1015_0 | Clustered | 62 VC_1015_0  | 62  | 0.9947 | 1          | 0.9947 | 0 | 0 | 0 | 1 Ref      |
| MT497080 | Unassigned | Unassigned | Unassigned | 1015_0 | Clustered | 62 VC_1015_0  | 62  | 0.9947 | 1          | 0.9947 | 0 | 0 | 0 | 1 Ref      |
| MT497081 | Unassigned | Unassigned | Unassigned | 1015_0 | Clustered | 62 VC_1015_0  | 62  | 0.9947 | 1          | 0.9947 | 0 | 0 | 0 | 1 Ref      |
| MT497082 | Unassigned | Unassigned | Unassigned | 1015_0 | Clustered | 62 VC_1015_0  | 62  | 0.9947 | 1          | 0.9947 | 0 | 0 | 0 | 1 Ref      |
| MT497083 | Unassigned | Unassigned | Unassigned | 1015_0 | Clustered | 62 VC_1015_0  | 62  | 0.9947 | 1          | 0.9947 | 0 | 0 | 0 | 1 Ref      |
| MT497084 | Unassigned | Unassigned | Unassigned | 1015_0 | Clustered | 62 VC_1015_0  | 62  | 0.9947 | 1          | 0.9947 | 0 | 0 | 0 | 1 Ref      |
| MT497085 | Unassigned | Unassigned | Unassigned | 1015_0 | Clustered | 62 VC_1015_0  | 62  | 0.9947 | 1          | 0.9947 | 0 | 0 | 0 | 1 Ref      |
| MT497086 | Unassigned | Unassigned | Unassigned | 1015_0 | Clustered | 62 VC_1015_0  | 62  | 0.9947 | 1          | 0.9947 | 0 | 0 | 0 | 1 Ref      |
| MT497087 | Unassigned | Unassigned | Unassigned | 1015_0 | Clustered | 62 VC_1015_0  | 62  | 0.9947 | 1          | 0.9947 | 0 | 0 | 0 | 1 Ref      |
| MT497088 | Unassigned | Unassigned | Unassigned | 1015_0 | Clustered | 62 VC_1015_0  | 62  | 0.9947 | 1          | 0.9947 | 0 | 0 | 0 | 1 Ref      |
| MT497089 | Unassigned | Unassigned | Unassigned | 1015_0 | Clustered | 62 VC_1015_0  | 62  | 0.9947 | 1          | 0.9947 | 0 | 0 | 0 | 1 Ref      |
| MT497090 | Unassigned | Unassigned | Unassigned | 1015_0 | Clustered | 62 VC_1015_0  | 62  | 0.9947 | 1          | 0.9947 | 0 | 0 | 0 | 1 Ref      |
| MT497091 | Unassigned | Unassigned | Unassigned | 1015_0 | Clustered | 62 VC_1015_0  | 62  | 0.9947 | 1          | 0.9947 | 0 | 0 | 0 | 1 Ref      |
| MT497092 | Unassigned | Unassigned | Unassigned | 1015_0 | Clustered | 62 VC_1015_0  | 62  | 0.9947 | 1          | 0.9947 | 0 | 0 | 0 | 1 Ref      |
| MT497093 | Unassigned | Unassigned | Unassigned | 1015_0 | Clustered | 62 VC_1015_0  | 62  | 0.9947 | 1          | 0.9947 | 0 | 0 | 0 | 1 Ref      |
| MT497094 | Unassigned | Unassigned | Unassigned | 1015_0 | Clustered | 62 VC_1015_0  | 62  | 0.9947 | 1          | 0.9947 | 0 | 0 | 0 | 1 Ref      |
| MT497095 | Unassigned | Unassigned | Unassigned | 1015_0 | Clustered | 62 VC_1015_0  | 62  | 0.9947 | 1          | 0.9947 | 0 | 0 | 0 | 1 Ref      |
| MT497096 | Unassigned | Unassigned | Unassigned | 1015_0 | Clustered | 62 VC_1015_0  | 62  | 0.9947 | 1          | 0.9947 | 0 | 0 | 0 | 1 Ref      |
| MT497097 | Unassigned | Unassigned | Unassigned | 1015_0 | Clustered | 62 VC_1015_0  | 62  | 0.9947 | 1          | 0.9947 | 0 | 0 | 0 | 1 Ref      |
| MT497098 | Unassigned | Unassigned | Unassigned | 1015_0 | Clustered | 62 VC_1015_0  | 62  | 0.9947 | 1          | 0.9947 | 0 | 0 | 0 | 1 Ref      |
| MT497099 | Unassigned | Unassigned | Unassigned | 1015_0 | Clustered | 62 VC_1015_0  | 62  | 0.9947 | 1          | 0.9947 | 0 | 0 | 0 | 1 Ref      |
| MT497100 | Unassigned | Unassigned | Unassigned | 1015_0 | Clustered | 62 VC_1015_0  | 62  | 0.9947 | 1          | 0.9947 | 0 | 0 | 0 | 1 Ref      |
| MT497101 | Unassigned | Unassigned | Unassigned | 1015_0 | Clustered | 62 VC_1015_0  | 62  | 0.9947 | 1          | 0.9947 | 0 | 0 | 0 | 1 Ref      |
| MT497102 | Unassigned | Unassigned | Unassigned | 1015_0 | Clustered | 62 VC_1015_0  | 62  | 0.9947 | 1          | 0.9947 | 0 | 0 | 0 | 1 Ref      |
| MT497103 | Unassigned | Unassigned | Unassigned | 1015_0 | Clustered | 62 VC_1015_0  | 62  | 0.9947 | 1          | 0.9947 | 0 | 0 | 0 | 1 Ref      |
| MT497104 | Unassigned | Unassigned | Unassigned | 1015_0 | Clustered | 62 VC_1015_0  | 62  | 0.9947 | 1          | 0.9947 | 0 | 0 | 0 | 1 Ref      |
| MT497105 | Unassigned | Unassigned | Unassigned | 1015_0 | Clustered | 62 VC_1015_0  | 62  | 0.9947 | 1          | 0.9947 | 0 | 0 | 0 | 1 Ref      |
| MT497106 | Unassigned | Unassigned | Unassigned | 1015_0 | Clustered | 62 VC_1015_0  | 62  | 0.9947 | 1          | 0.9947 | 0 | 0 | 0 | 1 Ref      |
| MT497107 | Unassigned | Unassigned | Unassigned | 1015_0 | Clustered | 62 VC_1015_0  | 62  | 0.9947 | 1          | 0.9947 | 0 | 0 | 0 | 1 Ref      |
| MT497108 | Unassigned | Unassigned | Unassigned | 1015_0 | Clustered | 62 VC_1015_0  | 62  | 0.9947 | 1          | 0.9947 | 0 | 0 | 0 | 1 Ref      |
| MT497109 | Unassigned | Unassigned | Unassigned | 1015_0 | Clustered | 62 VC_1015_0  | 62  | 0.9947 | 1          | 0.9947 | 0 | 0 | 0 | 1 Ref      |
| MT497110 | Unassigned | Unassigned | Unassigned | 1015_0 | Clustered | 62 VC_1015_0  | 62  | 0.9947 | 1          | 0.9947 | 0 | 0 | 0 | 1 Ref      |
| MT497111 | Unassigned | Unassigned | Unassigned | 1015_0 | Clustered | 62 VC_1015_0  | 62  | 0.9947 | 1          | 0.9947 | 0 | 0 | 0 | 1 Ref      |
| MT497112 | Unassigned | Unassigned | Unassigned | 1015_0 | Clustered | 62 VC_1015_0  | 62  | 0.9947 | 1          | 0.9947 | 0 | 0 | 0 | 1 Ref      |
| MT497113 | Unassigned | Unassigned | Unassigned | 1015_0 | Clustered | 62 VC_1015_0  | 62  | 0.9947 | 1          | 0.9947 | 0 | 0 | 0 | 1 Ref      |
| MT497114 | Unassigned | Unassigned | Unassigned | 1015_0 | Clustered | 62 VC_1015_0  | 62  | 0.9947 | 1          | 0.9947 | 0 | 0 | 0 | 1 Ref      |
| MT497115 | Unassigned | Unassigned | Unassigned | 1015_0 | Clustered | 62 VC_1015_0  | 62  | 0.9947 | 1          | 0.9947 | 0 | 0 | 0 | 1 Ref      |
| MT497116 | Unassigned | Unassigned | Unassigned | 1015_0 | Clustered | 62 VC_1015_0  | 62  | 0.9947 | 1          | 0.9947 | 0 | 0 | 0 | 1 Ref      |
| MT497117 | Unassigned | Unassigned | Unassigned | 1015_0 | Clustered | 62 VC_1015_0  | 62  | 0.9947 | 1          | 0.9947 | 0 | 0 | 0 | 1 Ref      |
| MT497118 | Unassigned | Unassigned | Unassigned | 1015_0 | Clustered | 62 VC_1015_0  | 62  | 0.9947 | 1          | 0.9947 | 0 | 0 | 0 | 1 Ref      |
| MT497119 | Unassigned | Unassigned | Unassigned | 1015_0 | Clustered | 62 VC_1015_0  | 62  | 0.9947 | 1          | 0.9947 | 0 | 0 | 0 | 1 Ref      |
| MT497120 | Unassigned | Unassigned | Unassigned | 1015_0 | Clustered | 62 VC_1015_0  | 62  | 0.9947 | 1          | 0.9947 | 0 | 0 | 0 | 1 Ref      |
| MT497121 | Unassigned | Unassigned | Unassigned | 1015_0 | Clustered | 62 VC_1015_0  | 62  | 0.9947 | 1          | 0.9947 | 0 | 0 | 0 | 1 Ref      |
| MT497122 | Unassigned | Unassigned | Unassigned | 1015_0 | Clustered | 62 VC_1015_0  | 62  | 0.9947 | 1          | 0.9947 | 0 | 0 | 0 | 1 Ref      |
| MT497123 | Unassigned | Unassigned | Unassigned | 1015_0 | Clustered | 62 VC_1015_0  | 62  | 0.9947 | 1          | 0.9947 | 0 | 0 | 0 | 1 Ref      |
| MT497124 | Unassigned | Unassigned | Unassigned | 1015_0 | Clustered | 62 VC_1015_0  | 62  | 0.9947 | 1          | 0.9947 | 0 | 0 | 0 | 1 Ref      |
| MT497125 | Unassigned | Unassigned | Unassigned | 1015_0 | Clustered | 62 VC_1015_0  | 62  | 0.9947 | 1          | 0.9947 | 0 | 0 | 0 | 1 Ref      |
| MT497224 | Unassigned | Unassigned | Unassigned | 1396_0 | Clustered | 110 VC_1396_0 | 110 | 1      | 1          | 1      | 0 | 0 | 0 | 0.9746 Ref |
| MT497225 | Unassigned | Unassigned | Unassigned | 1396_0 | Clustered | 110 VC_1396_0 | 110 | 1      | 1          | 1      | 0 | 0 | 0 | 0.9746 Ref |



[illegible]



|          |            |            |            |         |                     |              |     |        |            |        |   |   |   |        |     |
|----------|------------|------------|------------|---------|---------------------|--------------|-----|--------|------------|--------|---|---|---|--------|-----|
| MT498066 | Unassigned | Unassigned | Unassigned | 216_6   | Clustered           | 42 VC_216_6  | 42  | 0.473  | 1          | 0.473  | 0 | 0 | 0 | 0.8351 | Ref |
| MT498067 | Unassigned | Unassigned | Unassigned | 1344_0  | Clustered           | 78 VC_1344_0 | 78  | 0.9732 | 1          | 0.9732 | 0 | 0 | 0 | 1      | Ref |
| MT498086 | Unassigned | Unassigned | Unassigned | 133_33  | Clustered/Singleton | 1 VC_133_33  | 1   | 0      | 1          | 0      | 0 | 0 | 0 | 1      | Ref |
| MT498087 | Unassigned | Unassigned | Unassigned | 592_0   | Clustered           | 50 VC_592_0  | 50  | 0.7314 | 1          | 0.7314 | 0 | 0 | 0 | 1      | Ref |
| MT498088 | Unassigned | Unassigned | Unassigned | 592_0   | Clustered           | 50 VC_592_0  | 50  | 0.7314 | 1          | 0.7314 | 0 | 0 | 0 | 1      | Ref |
| MT500540 | Unassigned | Unassigned | Unassigned | 379_0   | Clustered           | 5 VC_379_0   | 5   | 0.4779 | 0.99999992 | 0.4779 | 0 | 0 | 0 | 0.9    | Ref |
| MT501516 | Unassigned | Unassigned | Unassigned | 837_0   | Clustered           | 29 VC_837_0  | 29  | 0.9955 | 1          | 0.9955 | 0 | 0 | 0 | 1      | Ref |
| MT511058 | Unassigned | Unassigned | Unassigned | 456_0   | Clustered           | 62 VC_456_0  | 62  | 0.9026 | 1          | 0.9026 | 0 | 0 | 0 | 1      | Ref |
| MT514532 | Unassigned | Unassigned | Unassigned | 100_0   | Clustered           | 15 VC_100_0  | 15  | 0.6536 | 1          | 0.6536 | 0 | 0 | 0 | 1      | Ref |
| MT515751 | Unassigned | Unassigned | Unassigned | 283_34  | Clustered           | 4 VC_283_34  | 4   | 0.0082 | 0.9997481  | 0.0082 | 0 | 0 | 0 | 1      | Ref |
| MT515752 | Unassigned | Unassigned | Unassigned | 283_100 | Clustered           | 2 VC_283_100 | 2   | 0.0027 | 0.90891788 | 0.0024 | 0 | 0 | 0 | 1      | Ref |
| MT515753 | Unassigned | Unassigned | Unassigned | 283_136 | Clustered           | 2 VC_283_136 | 2   | 0.0026 | 0.94116137 | 0.0024 | 0 | 0 | 0 | 1      | Ref |
| MT515754 | Unassigned | Unassigned | Unassigned | 283_67  | Clustered           | 2 VC_283_67  | 2   | 0.0027 | 0.90726003 | 0.0025 | 0 | 0 | 0 | 1      | Ref |
| MT515755 | Unassigned | Unassigned | Unassigned | 283_136 | Clustered           | 2 VC_283_136 | 2   | 0.0026 | 0.94116137 | 0.0024 | 0 | 0 | 0 | 1      | Ref |
| MT515756 | Unassigned | Unassigned | Unassigned | 283_180 | Clustered/Singleton | 1 VC_283_180 | 1   | 0      | 1          | 0      | 0 | 0 | 0 | 1      | Ref |
| MT515757 | Unassigned | Unassigned | Unassigned | 386_0   | Clustered           | 49 VC_386_0  | 49  | 0.7941 | 1          | 0.7941 | 0 | 0 | 0 | 1      | Ref |
| MT520979 | Unassigned | Unassigned | Unassigned | 695_0   | Clustered           | 48 VC_695_0  | 48  | 0.8162 | 1          | 0.8162 | 0 | 0 | 0 | 1      | Ref |
| MT521990 | Unassigned | Unassigned | Unassigned | 1344_0  | Clustered           | 78 VC_1344_0 | 78  | 0.9732 | 1          | 0.9732 | 0 | 0 | 0 | 1      | Ref |
| MT521994 | Unassigned | Unassigned | Unassigned | 799_1   | Clustered           | 27 VC_799_1  | 27  | 0.8611 | 1          | 0.8611 | 0 | 0 | 0 | 1      | Ref |
| MT521995 | Unassigned | Unassigned | Unassigned | 522_1   | Clustered           | 5 VC_522_1   | 5   | 0.1017 | 0.99999997 | 0.1017 | 0 | 0 | 0 | 0.8    | Ref |
| MT521996 | Unassigned | Unassigned | Unassigned | 567_0   | Clustered           | 8 VC_567_0   | 8   | 0.4935 | 1          | 0.4935 | 0 | 0 | 0 | 1      | Ref |
| MT521997 | Unassigned | Unassigned | Unassigned | 410_0   | Clustered           | 7 VC_410_0   | 7   | 0.7905 | 1          | 0.7905 | 0 | 0 | 0 | 1      | Ref |
| MT521998 | Unassigned | Unassigned | Unassigned | 1178_0  | Clustered           | 24 VC_1178_0 | 24  | 0.9524 | 1          | 0.9524 | 0 | 0 | 0 | 1      | Ref |
| MT521999 | Unassigned | Unassigned | Unassigned | 685_0   | Clustered           | 16 VC_685_0  | 16  | 0.2972 | 1          | 0.2972 | 0 | 0 | 0 | 0.9167 | Ref |
| MT522001 | Unassigned | Unassigned | Unassigned | 1343_0  | Clustered           | 21 VC_1343_0 | 21  | 0.9843 | 1          | 0.9843 | 0 | 0 | 0 | 1      | Ref |
| MT522002 | Unassigned | Unassigned | Unassigned | 515_0   | Clustered           | 16 VC_515_0  | 16  | 0.3793 | 1          | 0.3793 | 0 | 0 | 0 | 1      | Ref |
| MT522003 | Unassigned | Unassigned | Unassigned | 1343_0  | Clustered           | 21 VC_1343_0 | 21  | 0.9843 | 1          | 0.9843 | 0 | 0 | 0 | 1      | Ref |
| MT522004 | Unassigned | Unassigned | Unassigned | 220_0   | Clustered           | 4 VC_220_0   | 4   | 0.0615 | 0.99998802 | 0.0615 | 0 | 0 | 0 | 1      | Ref |
| MT522005 | Unassigned | Unassigned | Unassigned | 551_8   | Clustered           | 19 VC_551_8  | 19  | 0.1039 | 1          | 0.1039 | 0 | 0 | 0 | 0.8713 | Ref |
| MT522006 | Unassigned | Unassigned | Unassigned | 1177_0  | Clustered           | 14 VC_1177_0 | 14  | 0.7847 | 1          | 0.7847 | 0 | 0 | 0 | 0.989  | Ref |
| MT522007 | Unassigned | Unassigned | Unassigned | 224_0   | Clustered           | 19 VC_224_0  | 19  | 0.9416 | 1          | 0.9416 | 0 | 0 | 0 | 1      | Ref |
| MT526905 | Unassigned | Unassigned | Unassigned | 283_100 | Clustered           | 2 VC_283_100 | 2   | 0.0027 | 0.90891788 | 0.0024 | 0 | 0 | 0 | 1      | Ref |
| MT533174 | Unassigned | Unassigned | Unassigned | 290_1   | Clustered           | 8 VC_290_1   | 8   | 0.0757 | 1          | 0.0757 | 0 | 0 | 0 | 0.8571 | Ref |
| MT536174 | Unassigned | Unassigned | Unassigned | 469_0   | Clustered           | 2 VC_469_0   | 2   | 0.1492 | 0.95658144 | 0.1427 | 0 | 0 | 0 | 1      | Ref |
| MT542512 | Unassigned | Unassigned | Unassigned | 386_0   | Clustered           | 49 VC_386_0  | 49  | 0.7941 | 1          | 0.7941 | 0 | 0 | 0 | 1      | Ref |
| MT542697 | Unassigned | Unassigned | Unassigned | 823_0   | Clustered           | 124 VC_823_0 | 124 | 0.9492 | 1          | 0.9492 | 0 | 0 | 0 | 1      | Ref |
| MT543041 | Unassigned | Unassigned | Unassigned | 392_0   | Clustered           | 126 VC_392_0 | 126 | 0.9621 | 1          | 0.9621 | 0 | 0 | 0 | 1      | Ref |
| MT552976 | Unassigned | Unassigned | Unassigned | 849_4   | Clustered           | 2 VC_849_4   | 2   | 0.0239 | 0.86481074 | 0.0206 | 0 | 0 | 0 | 1      | Ref |
| MT553335 | Unassigned | Unassigned | Unassigned | 558_1   | Clustered           | 2 VC_558_1   | 2   | 0.0032 | 0.78405032 | 0.0025 | 0 | 0 | 0 | 0      | Ref |
| MT553336 | Unassigned | Unassigned | Unassigned | 1176_0  | Clustered           | 41 VC_1176_0 | 41  | 0.9558 | 1          | 0.9558 | 0 | 0 | 0 | 0.9976 | Ref |
| MT553337 | Unassigned | Unassigned | Unassigned | 219_0   | Clustered           | 5 VC_219_0   | 5   | 0.08   | 0.99999998 | 0.08   | 0 | 0 | 0 | 1      | Ref |
| MT553338 | Unassigned | Unassigned | Unassigned | 517_1   | Clustered           | 108 VC_517_1 | 108 | 0.8483 | 1          | 0.8483 | 0 | 0 | 0 | 0.9955 | Ref |
| MT553339 | Unassigned | Unassigned | Unassigned | 1240_0  | Clustered           | 82 VC_1240_0 | 82  | 0.7945 | 1          | 0.7945 | 0 | 0 | 0 | 1      | Ref |
| MT553340 | Unassigned | Unassigned | Unassigned | 1163_0  | Clustered           | 28 VC_1163_0 | 28  | 0.4923 | 1          | 0.4923 | 0 | 0 | 0 | 1      | Ref |
| MT553341 | Unassigned | Unassigned | Unassigned | 1240_0  | Clustered           | 82 VC_1240_0 | 82  | 0.7945 | 1          | 0.7945 | 0 | 0 | 0 | 1      | Ref |
| MT553343 | Unassigned | Unassigned | Unassigned | 1240_0  | Clustered           | 82 VC_1240_0 | 82  | 0.7945 | 1          | 0.7945 | 0 | 0 | 0 | 1      | Ref |
| MT553344 | Unassigned | Unassigned | Unassigned | 406_0   | Clustered           | 11 VC_406_0  | 11  | 0.9449 | 1          | 0.9449 | 0 | 0 | 0 | 1      | Ref |
| MT553345 | Unassigned | Unassigned | Unassigned | 520_40  | Clustered           | 4 VC_520_40  | 4   | 0.0396 | 0.99998776 | 0.0396 | 0 | 0 | 0 | 1      | Ref |
| MT553346 | Unassigned | Unassigned | Unassigned | 517_1   | Clustered           | 108 VC_517_1 | 108 | 0.8483 | 1          | 0.8483 | 0 | 0 | 0 | 0.9955 | Ref |
| MT554104 | Unassigned | Unassigned | Unassigned | 149_18  | Clustered/Singleton | 1 VC_149_18  | 1   | 0      | 1          | 0      | 0 | 0 | 0 | 1      | Ref |
| MT559526 | Unassigned | Unassigned | Unassigned | 111_0   | Clustered           | 91 VC_111_0  | 91  | 0.9587 | 1          | 0.9587 | 0 | 0 | 0 | 1      | Ref |
| MT559527 | Unassigned | Unassigned | Unassigned | 111_0   | Clustered           | 91 VC_111_0  | 91  | 0.9587 | 1          | 0.9587 | 0 | 0 | 0 | 1      | Ref |
| MT559528 | Unassigned | Unassigned | Unassigned | 123_0   | Clustered           | 23 VC_123_0  | 23  | 0.817  | 1          | 0.817  | 0 | 0 | 0 | 1      | Ref |
| MT560058 | Unassigned | Unassigned | Unassigned | 669_5   | Clustered/Singleton | 1 VC_669_5   | 1   | 0      | 1          | 0      | 0 | 0 | 0 | 1      | Ref |
| MT560059 | Unassigned | Unassigned | Unassigned | 849_4   | Clustered           | 2 VC_849_4   | 2   | 0.0239 | 0.86481074 | 0.0206 | 0 | 0 | 0 | 1      | Ref |
| MT577844 | Unassigned | Unassigned | Unassigned | 190_4   | Clustered/Singleton | 1 VC_190_4   | 1   | 0      | 1          | 0      | 0 | 0 | 0 | 1      | Ref |
| MT580116 | Unassigned | Unassigned | Unassigned | 476_0   | Clustered           | 19 VC_476_0  | 19  | 0.7814 | 1          | 0.7814 | 0 | 0 | 0 | 1      | Ref |
| MT580117 | Unassigned | Unassigned | Unassigned | 476_0   | Clustered           | 19 VC_476_0  | 19  | 0.7814 | 1          | 0.7814 | 0 | 0 | 0 | 1      | Ref |
| MT580897 | Unassigned | Unassigned | Unassigned | 491_0   | Clustered           | 36 VC_491_0  | 36  | 0.5336 | 1          | 0.5336 | 0 | 0 | 0 | 0.9714 | Ref |
| MT584805 | Unassigned | Unassigned | Unassigned | 884_0   | Clustered           | 28 VC_884_0  | 28  | 0.6211 | 1          | 0.6211 | 0 | 0 | 0 | 0.9841 | Ref |
| MT585273 | Unassigned | Unassigned | Unassigned | 912_0   | Clustered           | 76 VC_912_0  | 76  | 0.979  | 1          | 0.979  | 0 | 0 | 0 | 1      | Ref |
| MT585274 | Unassigned | Unassigned | Unassigned | 912_0   | Clustered           | 76 VC_912_0  | 76  | 0.979  | 1          | 0.979  | 0 | 0 | 0 | 1      | Ref |
| MT585275 | Unassigned | Unassigned | Unassigned | 912_0   | Clustered           | 76 VC_912_0  | 76  | 0.979  | 1          | 0.979  | 0 | 0 | 0 | 1      | Ref |
| MT585276 | Unassigned | Unassigned | Unassigned | 912_0   | Clustered           | 76 VC_912_0  | 76  | 0.979  | 1          | 0.979  | 0 | 0 | 0 | 1      | Ref |
| MT585277 | Unassigned | Unassigned | Unassigned | 912_0   | Clustered           | 76 VC_912_0  | 76  | 0.979  | 1          | 0.979  | 0 | 0 | 0 | 1      | Ref |
| MT585278 | Unassigned | Unassigned | Unassigned | 912_0   | Clustered           | 76 VC_912_0  | 76  | 0.979  | 1          | 0.979  | 0 | 0 | 0 | 1      | Ref |
| MT585279 | Unassigned | Unassigned | Unassigned | 912_0   | Clustered           | 76 VC_912_0  | 76  | 0.979  | 1          | 0.979  | 0 | 0 | 0 | 1      | Ref |
| MT585280 | Unassigned | Unassigned | Unassigned | 912_0   | Clustered           | 76 VC_912_0  | 76  | 0.979  | 1          | 0.979  | 0 | 0 | 0 | 1      | Ref |
| MT585281 | Unassigned | Unassigned | Unassigned | 912_0   | Clustered           | 76 VC_912_0  | 76  | 0.979  | 1          | 0.979  | 0 | 0 | 0 | 1      | Ref |
| MT585282 | Unassigned | Unassigned | Unassigned | 912_0   | Clustered           | 76 VC_912_0  | 76  | 0.979  | 1          | 0.979  | 0 | 0 | 0 | 1      | Ref |
| MT585283 | Unassigned | Unassigned | Unassigned | 912_0   | Clustered           | 76 VC_912_0  | 76  | 0.979  | 1          | 0.979  | 0 | 0 | 0 | 1      | Ref |
| MT585284 | Unassigned | Unassigned | Unassigned | 912_0   | Clustered           | 76 VC_912_0  | 76  | 0.979  | 1          | 0.979  | 0 | 0 | 0 | 1      | Ref |
| MT585285 | Unassigned | Unassigned | Unassigned | 912_0   | Clustered           | 76 VC_912_0  | 76  | 0.979  | 1          | 0.979  | 0 | 0 | 0 | 1      | Ref |
| MT585286 | Unassigned | Unassigned | Unassigned | 912_0   | Clustered           | 76 VC_912_0  | 76  | 0.979  | 1          | 0.979  | 0 | 0 | 0 | 1      | Ref |
| MT585287 | Unassigned | Unassigned | Unassigned | 912_0   | Clustered           | 76 VC_912_0  | 76  | 0.979  | 1          | 0.979  | 0 | 0 | 0 | 1      | Ref |
| MT585288 | Unassigned | Unassigned | Unassigned | 912_0   | Clustered           | 76 VC_912_0  | 76  | 0.979  | 1          | 0.979  | 0 | 0 | 0 | 1      | Ref |
| MT585289 | Unassigned | Unassigned | Unassigned | 912_0   | Clustered           | 76 VC_912_0  | 76  | 0.979  | 1          | 0.979  | 0 | 0 | 0 | 1      | Ref |
| MT585290 | Unassigned | Unassigned | Unassigned | 912_0   | Clustered           | 76 VC_912_0  | 76  | 0.979  | 1          | 0.979  | 0 | 0 | 0 | 1      | Ref |
| MT585291 | Unassigned | Unassigned | Unassigned | 912_0   | Clustered           | 76 VC_912_0  | 76  | 0.979  | 1          | 0.979  | 0 | 0 | 0 | 1      | Ref |
| MT585292 | Unassigned | Unassigned | Unassigned | 912_0   | Clustered           | 76 VC_912_0  | 76  | 0.979  | 1          | 0.979  | 0 | 0 | 0 | 1      | Ref |
| MT585293 | Unassigned | Unassigned | Unassigned | 912_0   | Clustered           | 76 VC_912_0  | 76  | 0.979  | 1          | 0.979  | 0 | 0 | 0 | 1      | Ref |



|          |            |            |            |         |                     |              |     |        |            |        |   |   |   |            |
|----------|------------|------------|------------|---------|---------------------|--------------|-----|--------|------------|--------|---|---|---|------------|
| MT585294 | Unassigned | Unassigned | Unassigned | 912_0   | Clustered           | 76 VC_912_0  | 76  | 0.979  | 1          | 0.979  | 0 | 0 | 0 | 1 Ref      |
| MT585295 | Unassigned | Unassigned | Unassigned | 912_0   | Clustered           | 76 VC_912_0  | 76  | 0.979  | 1          | 0.979  | 0 | 0 | 0 | 1 Ref      |
| MT585296 | Unassigned | Unassigned | Unassigned | 912_0   | Clustered           | 76 VC_912_0  | 76  | 0.979  | 1          | 0.979  | 0 | 0 | 0 | 1 Ref      |
| MT585297 | Unassigned | Unassigned | Unassigned | 912_0   | Clustered           | 76 VC_912_0  | 76  | 0.979  | 1          | 0.979  | 0 | 0 | 0 | 1 Ref      |
| MT585298 | Unassigned | Unassigned | Unassigned | 912_0   | Clustered           | 76 VC_912_0  | 76  | 0.979  | 1          | 0.979  | 0 | 0 | 0 | 1 Ref      |
| MT585299 | Unassigned | Unassigned | Unassigned | 912_0   | Clustered           | 76 VC_912_0  | 76  | 0.979  | 1          | 0.979  | 0 | 0 | 0 | 1 Ref      |
| MT585300 | Unassigned | Unassigned | Unassigned | 912_0   | Clustered           | 76 VC_912_0  | 76  | 0.979  | 1          | 0.979  | 0 | 0 | 0 | 1 Ref      |
| MT585301 | Unassigned | Unassigned | Unassigned | 912_0   | Clustered           | 76 VC_912_0  | 76  | 0.979  | 1          | 0.979  | 0 | 0 | 0 | 1 Ref      |
| MT585302 | Unassigned | Unassigned | Unassigned | 912_0   | Clustered           | 76 VC_912_0  | 76  | 0.979  | 1          | 0.979  | 0 | 0 | 0 | 1 Ref      |
| MT585303 | Unassigned | Unassigned | Unassigned | 912_0   | Clustered           | 76 VC_912_0  | 76  | 0.979  | 1          | 0.979  | 0 | 0 | 0 | 1 Ref      |
| MT585304 | Unassigned | Unassigned | Unassigned | 912_0   | Clustered           | 76 VC_912_0  | 76  | 0.979  | 1          | 0.979  | 0 | 0 | 0 | 1 Ref      |
| MT585305 | Unassigned | Unassigned | Unassigned | 912_0   | Clustered           | 76 VC_912_0  | 76  | 0.979  | 1          | 0.979  | 0 | 0 | 0 | 1 Ref      |
| MT585306 | Unassigned | Unassigned | Unassigned | 912_0   | Clustered           | 76 VC_912_0  | 76  | 0.979  | 1          | 0.979  | 0 | 0 | 0 | 1 Ref      |
| MT585307 | Unassigned | Unassigned | Unassigned | 912_0   | Clustered           | 76 VC_912_0  | 76  | 0.979  | 1          | 0.979  | 0 | 0 | 0 | 1 Ref      |
| MT585308 | Unassigned | Unassigned | Unassigned | 912_0   | Clustered           | 76 VC_912_0  | 76  | 0.979  | 1          | 0.979  | 0 | 0 | 0 | 1 Ref      |
| MT585309 | Unassigned | Unassigned | Unassigned | 912_0   | Clustered           | 76 VC_912_0  | 76  | 0.979  | 1          | 0.979  | 0 | 0 | 0 | 1 Ref      |
| MT585310 | Unassigned | Unassigned | Unassigned | 912_0   | Clustered           | 76 VC_912_0  | 76  | 0.979  | 1          | 0.979  | 0 | 0 | 0 | 1 Ref      |
| MT585311 | Unassigned | Unassigned | Unassigned | 912_0   | Clustered           | 76 VC_912_0  | 76  | 0.979  | 1          | 0.979  | 0 | 0 | 0 | 1 Ref      |
| MT585312 | Unassigned | Unassigned | Unassigned | 912_0   | Clustered           | 76 VC_912_0  | 76  | 0.979  | 1          | 0.979  | 0 | 0 | 0 | 1 Ref      |
| MT585313 | Unassigned | Unassigned | Unassigned | 912_0   | Clustered           | 76 VC_912_0  | 76  | 0.979  | 1          | 0.979  | 0 | 0 | 0 | 1 Ref      |
| MT585314 | Unassigned | Unassigned | Unassigned | 912_0   | Clustered           | 76 VC_912_0  | 76  | 0.979  | 1          | 0.979  | 0 | 0 | 0 | 1 Ref      |
| MT585315 | Unassigned | Unassigned | Unassigned | 912_0   | Clustered           | 76 VC_912_0  | 76  | 0.979  | 1          | 0.979  | 0 | 0 | 0 | 1 Ref      |
| MT586120 | Unassigned | Unassigned | Unassigned | 657_0   | Clustered           | 3 VC_657_0   | 3   | 0.0217 | 0.9528126  | 0.0201 | 0 | 0 | 0 | 1 Ref      |
| MT588083 | Unassigned | Unassigned | Unassigned | 637_0   | Clustered           | 115 VC_637_0 | 115 | 0.731  | 1          | 0.731  | 0 | 0 | 0 | 0.8764 Ref |
| MT591577 | Unassigned | Unassigned | Unassigned | 50_0    | Clustered           | 9 VC_50_0    | 9   | 0.5531 | 1          | 0.5531 | 0 | 0 | 0 | 1 Ref      |
| MT596499 | Unassigned | Unassigned | Unassigned | 667_0   | Clustered           | 7 VC_667_0   | 7   | 0.4101 | 1          | 0.4101 | 0 | 0 | 0 | 1 Ref      |
| MT596501 | Unassigned | Unassigned | Unassigned | 150_0   | Clustered           | 13 VC_150_0  | 13  | 0.2417 | 1          | 0.2417 | 0 | 0 | 0 | 0.9872 Ref |
| MT596502 | Unassigned | Unassigned | Unassigned | 150_0   | Clustered           | 13 VC_150_0  | 13  | 0.2417 | 1          | 0.2417 | 0 | 0 | 0 | 0.9872 Ref |
| MT596503 | Unassigned | Unassigned | Unassigned | 150_0   | Clustered           | 13 VC_150_0  | 13  | 0.2417 | 1          | 0.2417 | 0 | 0 | 0 | 0.9872 Ref |
| MT596504 | Unassigned | Unassigned | Unassigned | 150_0   | Clustered           | 13 VC_150_0  | 13  | 0.2417 | 1          | 0.2417 | 0 | 0 | 0 | 0.9872 Ref |
| MT596505 | Unassigned | Unassigned | Unassigned | 150_0   | Clustered           | 13 VC_150_0  | 13  | 0.2417 | 1          | 0.2417 | 0 | 0 | 0 | 0.9872 Ref |
| MT596506 | Unassigned | Unassigned | Unassigned | 150_0   | Clustered           | 13 VC_150_0  | 13  | 0.2417 | 1          | 0.2417 | 0 | 0 | 0 | 0.9872 Ref |
| MT601270 | Unassigned | Unassigned | Unassigned | 87_0    | Clustered           | 8 VC_87_0    | 8   | 0.5545 | 1          | 0.5545 | 0 | 0 | 0 | 1 Ref      |
| MT601271 | Unassigned | Unassigned | Unassigned | 87_0    | Clustered           | 8 VC_87_0    | 8   | 0.5545 | 1          | 0.5545 | 0 | 0 | 0 | 1 Ref      |
| MT601272 | Unassigned | Unassigned | Unassigned | 89_1    | Clustered           | 2 VC_89_1    | 2   | 0.0447 | 0.9464689  | 0.0423 | 0 | 0 | 0 | 1 Ref      |
| MT601273 | Unassigned | Unassigned | Unassigned | 89_0    | Clustered           | 2 VC_89_0    | 2   | 0.0451 | 0.92849471 | 0.0419 | 0 | 0 | 0 | 1 Ref      |
| MT601274 | Unassigned | Unassigned | Unassigned | 89_0    | Clustered           | 2 VC_89_0    | 2   | 0.0451 | 0.92849471 | 0.0419 | 0 | 0 | 0 | 1 Ref      |
| MT611523 | Unassigned | Unassigned | Unassigned | 290_0   | Clustered           | 10 VC_290_0  | 10  | 0.0981 | 1          | 0.0981 | 0 | 0 | 0 | 1 Ref      |
| MT612088 | Unassigned | Unassigned | Unassigned | 531_0   | Clustered           | 9 VC_531_0   | 9   | 0.26   | 1          | 0.26   | 0 | 0 | 0 | 1 Ref      |
| MT612089 | Unassigned | Unassigned | Unassigned | 531_0   | Clustered           | 9 VC_531_0   | 9   | 0.26   | 1          | 0.26   | 0 | 0 | 0 | 1 Ref      |
| MT613935 | Unassigned | Unassigned | Unassigned | 125_0   | Clustered           | 17 VC_125_0  | 17  | 0.9244 | 1          | 0.9244 | 0 | 0 | 0 | 1 Ref      |
| MT623546 | Unassigned | Unassigned | Unassigned | 700_0   | Clustered           | 10 VC_700_0  | 10  | 0.8076 | 1          | 0.8076 | 0 | 0 | 0 | 1 Ref      |
| MT623578 | Unassigned | Unassigned | Unassigned | 793_0   | Clustered           | 12 VC_793_0  | 12  | 0.8531 | 1          | 0.8531 | 0 | 0 | 0 | 1 Ref      |
| MT625440 | Unassigned | Unassigned | Unassigned | 386_0   | Clustered           | 49 VC_386_0  | 49  | 0.7941 | 1          | 0.7941 | 0 | 0 | 0 | 1 Ref      |
| MT627482 | Unassigned | Unassigned | Unassigned | 695_0   | Clustered           | 48 VC_695_0  | 48  | 0.8162 | 1          | 0.8162 | 0 | 0 | 0 | 1 Ref      |
| MT630408 | Unassigned | Unassigned | Unassigned | 283_155 | Clustered           | 2 VC_283_155 | 2   | 0.0027 | 0.9528577  | 0.0026 | 0 | 0 | 0 | 1 Ref      |
| MT630433 | Unassigned | Unassigned | Unassigned | 830_0   | Clustered           | 6 VC_830_0   | 6   | 0.6536 | 1          | 0.6536 | 0 | 0 | 0 | 1 Ref      |
| MT632017 | Unassigned | Unassigned | Unassigned | 637_0   | Clustered           | 115 VC_637_0 | 115 | 0.731  | 1          | 0.731  | 0 | 0 | 0 | 0.8764 Ref |
| MT632018 | Unassigned | Unassigned | Unassigned | 637_0   | Clustered           | 115 VC_637_0 | 115 | 0.731  | 1          | 0.731  | 0 | 0 | 0 | 0.8764 Ref |
| MT632019 | Unassigned | Unassigned | Unassigned | 637_0   | Clustered           | 115 VC_637_0 | 115 | 0.731  | 1          | 0.731  | 0 | 0 | 0 | 0.8764 Ref |
| MT632020 | Unassigned | Unassigned | Unassigned | 637_0   | Clustered           | 115 VC_637_0 | 115 | 0.731  | 1          | 0.731  | 0 | 0 | 0 | 0.8764 Ref |
| MT633129 | Unassigned | Unassigned | Unassigned | 699_0   | Clustered           | 71 VC_699_0  | 71  | 0.9352 | 1          | 0.9352 | 0 | 0 | 0 | 1 Ref      |
| MT635598 | Unassigned | Unassigned | Unassigned | 1008_0  | Clustered           | 4 VC_1008_0  | 4   | 0.6602 | 0.99993542 | 0.6601 | 0 | 0 | 0 | 1 Ref      |
| MT639639 | Unassigned | Unassigned | Unassigned | 570_0   | Clustered           | 9 VC_570_0   | 9   | 0.499  | 1          | 0.499  | 0 | 0 | 0 | 1 Ref      |
| MT639640 | Unassigned | Unassigned | Unassigned | 1093_0  | Clustered           | 40 VC_1093_0 | 40  | 0.8754 | 1          | 0.8754 | 0 | 0 | 0 | 1 Ref      |
| MT639641 | Unassigned | Unassigned | Unassigned | 1171_0  | Clustered           | 21 VC_1171_0 | 21  | 0.7125 | 1          | 0.7125 | 0 | 0 | 0 | 1 Ref      |
| MT639642 | Unassigned | Unassigned | Unassigned | 1344_0  | Clustered           | 78 VC_1344_0 | 78  | 0.9732 | 1          | 0.9732 | 0 | 0 | 0 | 1 Ref      |
| MT639643 | Unassigned | Unassigned | Unassigned | 1343_0  | Clustered           | 21 VC_1343_0 | 21  | 0.9843 | 1          | 0.9843 | 0 | 0 | 0 | 1 Ref      |
| MT639644 | Unassigned | Unassigned | Unassigned | 325_61  | Clustered           | 8 VC_325_61  | 8   | 0.0395 | 1          | 0.0395 | 0 | 0 | 0 | 0.7857 Ref |
| MT639645 | Unassigned | Unassigned | Unassigned | 218_0   | Clustered           | 3 VC_218_0   | 3   | 0.0481 | 0.99860979 | 0.0481 | 0 | 0 | 0 | 1 Ref      |
| MT639646 | Unassigned | Unassigned | Unassigned | 1345_1  | Clustered           | 2 VC_1345_1  | 2   | 0.0956 | 0.9561938  | 0.0914 | 0 | 0 | 0 | 1 Ref      |
| MT639647 | Unassigned | Unassigned | Unassigned | 1344_0  | Clustered           | 78 VC_1344_0 | 78  | 0.9732 | 1          | 0.9732 | 0 | 0 | 0 | 1 Ref      |
| MT639648 | Unassigned | Unassigned | Unassigned | 372_0   | Clustered           | 24 VC_372_0  | 24  | 0.5539 | 1          | 0.5539 | 0 | 0 | 0 | 1 Ref      |
| MT639649 | Unassigned | Unassigned | Unassigned | 1234_0  | Clustered           | 44 VC_1234_0 | 44  | 1      | 1          | 1      | 0 | 0 | 0 | 1 Ref      |
| MT639650 | Unassigned | Unassigned | Unassigned | 525_1   | Clustered           | 5 VC_525_1   | 5   | 0.0485 | 0.99999947 | 0.0485 | 0 | 0 | 0 | 0.9 Ref    |
| MT639651 | Unassigned | Unassigned | Unassigned | 1178_0  | Clustered           | 24 VC_1178_0 | 24  | 0.9524 | 1          | 0.9524 | 0 | 0 | 0 | 1 Ref      |
| MT639652 | Unassigned | Unassigned | Unassigned | 508_0   | Clustered           | 32 VC_508_0  | 32  | 0.906  | 1          | 0.906  | 0 | 0 | 0 | 1 Ref      |
| MT639653 | Unassigned | Unassigned | Unassigned | 1207_0  | Clustered           | 29 VC_1207_0 | 29  | 0.8225 | 1          | 0.8225 | 0 | 0 | 0 | 1 Ref      |
| MT639654 | Unassigned | Unassigned | Unassigned | 325_23  | Clustered           | 17 VC_325_23 | 17  | 0.0716 | 1          | 0.0716 | 0 | 0 | 0 | 0.6397 Ref |
| MT647605 | Unassigned | Unassigned | Unassigned | 486_0   | Clustered           | 18 VC_486_0  | 18  | 0.887  | 1          | 0.887  | 0 | 0 | 0 | 1 Ref      |
| MT647607 | Unassigned | Unassigned | Unassigned | 765_0   | Clustered           | 132 VC_765_0 | 132 | 1      | 1          | 1      | 0 | 0 | 0 | 1 Ref      |
| MT653137 | Unassigned | Unassigned | Unassigned | 637_0   | Clustered           | 115 VC_637_0 | 115 | 0.731  | 1          | 0.731  | 0 | 0 | 0 | 0.8764 Ref |
| MT653143 | Unassigned | Unassigned | Unassigned | 190_36  | Clustered/Singleton | 1 VC_190_36  | 1   | 0      | 1          | 0      | 0 | 0 | 0 | 1 Ref      |
| MT653144 | Unassigned | Unassigned | Unassigned | 637_0   | Clustered           | 115 VC_637_0 | 115 | 0.731  | 1          | 0.731  | 0 | 0 | 0 | 0.8764 Ref |
| MT653145 | Unassigned | Unassigned | Unassigned | 191_32  | Clustered           | 12 VC_191_32 | 12  | 0.0683 | 1          | 0.0683 | 0 | 0 | 0 | 0.7576 Ref |
| MT653146 | Unassigned | Unassigned | Unassigned | 190_37  | Clustered/Singleton | 1 VC_190_37  | 1   | 0      | 1          | 0      | 0 | 0 | 0 | 1 Ref      |
| MT657330 | Unassigned | Unassigned | Unassigned | 810_0   | Clustered           | 18 VC_810_0  | 18  | 0.9121 | 1          | 0.9121 | 0 | 0 | 0 | 1 Ref      |
| MT657331 | Unassigned | Unassigned | Unassigned | 514_0   | Clustered           | 75 VC_514_0  | 75  | 0.9402 | 1          | 0.9402 | 0 | 0 | 0 | 1 Ref      |
| MT657332 | Unassigned | Unassigned | Unassigned | 1344_0  | Clustered           | 78 VC_1344_0 | 78  | 0.9732 | 1          | 0.9732 | 0 | 0 | 0 | 1 Ref      |
| MT657333 | Unassigned | Unassigned | Unassigned | 1171_0  | Clustered           | 21 VC_1171_0 | 21  | 0.7125 | 1          | 0.7125 | 0 | 0 | 0 | 1 Ref      |
| MT657334 | Unassigned | Unassigned | Unassigned | 1360_0  | Clustered           | 31 VC_1360_0 | 31  | 0.8837 | 1          | 0.8837 | 0 | 0 | 0 | 1 Ref      |



|          |            |            |            |         |                     |              |     |        |            |        |   |   |   |        |     |
|----------|------------|------------|------------|---------|---------------------|--------------|-----|--------|------------|--------|---|---|---|--------|-----|
| MT657335 | Unassigned | Unassigned | Unassigned | 510_0   | Clustered           | 12 VC_510_0  | 12  | 0.3963 | 1          | 0.3963 | 0 | 0 | 0 | 0.9697 | Ref |
| MT657336 | Unassigned | Unassigned | Unassigned | 1352_0  | Clustered           | 31 VC_1352_0 | 31  | 0.849  | 1          | 0.849  | 0 | 0 | 0 | 1      | Ref |
| MT657337 | Unassigned | Unassigned | Unassigned | 1360_0  | Clustered           | 31 VC_1360_0 | 31  | 0.8837 | 1          | 0.8837 | 0 | 0 | 0 | 1      | Ref |
| MT657338 | Unassigned | Unassigned | Unassigned | 223_0   | Clustered           | 38 VC_223_0  | 38  | 0.9095 | 1          | 0.9095 | 0 | 0 | 0 | 1      | Ref |
| MT657339 | Unassigned | Unassigned | Unassigned | 1182_0  | Clustered           | 4 VC_1182_0  | 4   | 0.2845 | 0.99997676 | 0.2845 | 0 | 0 | 0 | 1      | Ref |
| MT657340 | Unassigned | Unassigned | Unassigned | 872_0   | Clustered           | 31 VC_872_0  | 31  | 0.8151 | 1          | 0.8151 | 0 | 0 | 0 | 0.8194 | Ref |
| MT657341 | Unassigned | Unassigned | Unassigned | 763_2   | Clustered           | 7 VC_763_2   | 7   | 0.2612 | 1          | 0.2612 | 0 | 0 | 0 | 1      | Ref |
| MT657342 | Unassigned | Unassigned | Unassigned | 325_35  | Clustered           | 17 VC_325_35 | 17  | 0.0732 | 1          | 0.0732 | 0 | 0 | 0 | 0.7721 | Ref |
| MT657343 | Unassigned | Unassigned | Unassigned | 1163_0  | Clustered           | 28 VC_1163_0 | 28  | 0.4923 | 1          | 0.4923 | 0 | 0 | 0 | 1      | Ref |
| MT657344 | Unassigned | Unassigned | Unassigned | 1163_0  | Clustered           | 28 VC_1163_0 | 28  | 0.4923 | 1          | 0.4923 | 0 | 0 | 0 | 1      | Ref |
| MT658802 | Unassigned | Unassigned | Unassigned | 763_2   | Clustered           | 7 VC_763_2   | 7   | 0.2612 | 1          | 0.2612 | 0 | 0 | 0 | 1      | Ref |
| MT658803 | Unassigned | Unassigned | Unassigned | 763_1   | Clustered           | 9 VC_763_1   | 9   | 0.3706 | 1          | 0.3706 | 0 | 0 | 0 | 1      | Ref |
| MT658804 | Unassigned | Unassigned | Unassigned | 216_6   | Clustered           | 42 VC_216_6  | 42  | 0.473  | 1          | 0.473  | 0 | 0 | 0 | 0.8351 | Ref |
| MT658805 | Unassigned | Unassigned | Unassigned | 890_0   | Clustered           | 3 VC_890_0   | 3   | 0.3565 | 0.99830951 | 0.3559 | 0 | 0 | 0 | 1      | Ref |
| MT661596 | Unassigned | Unassigned | Unassigned | 489_2   | Clustered/Singleton | 1 VC_489_2   | 1   | 0      | 1          | 0      | 0 | 0 | 0 | 1      | Ref |
| MT661597 | Unassigned | Unassigned | Unassigned | 695_0   | Clustered           | 48 VC_695_0  | 48  | 0.8162 | 1          | 0.8162 | 0 | 0 | 0 | 1      | Ref |
| MT661598 | Unassigned | Unassigned | Unassigned | 695_0   | Clustered           | 48 VC_695_0  | 48  | 0.8162 | 1          | 0.8162 | 0 | 0 | 0 | 1      | Ref |
| MT662115 | Unassigned | Unassigned | Unassigned | 5_0     | Clustered           | 30 VC_5_0    | 30  | 0.9647 | 1          | 0.9647 | 0 | 0 | 0 | 1      | Ref |
| MT663719 | Unassigned | Unassigned | Unassigned | 428_0   | Clustered           | 33 VC_428_0  | 33  | 0.9915 | 1          | 0.9915 | 0 | 0 | 0 | 1      | Ref |
| MT664722 | Unassigned | Unassigned | Unassigned | 812_1   | Clustered           | 4 VC_812_1   | 4   | 0.2266 | 0.99998426 | 0.2266 | 0 | 0 | 0 | 1      | Ref |
| MT664984 | Unassigned | Unassigned | Unassigned | 169_0   | Clustered           | 20 VC_169_0  | 20  | 0.7529 | 1          | 0.7529 | 0 | 0 | 0 | 1      | Ref |
| MT668623 | Unassigned | Unassigned | Unassigned | 739_0   | Clustered           | 26 VC_739_0  | 26  | 0.9571 | 1          | 0.9571 | 0 | 0 | 0 | 1      | Ref |
| MT668624 | Unassigned | Unassigned | Unassigned | 739_0   | Clustered           | 26 VC_739_0  | 26  | 0.9571 | 1          | 0.9571 | 0 | 0 | 0 | 1      | Ref |
| MT670417 | Unassigned | Unassigned | Unassigned | 78_3    | Clustered           | 11 VC_78_3   | 11  | 0.2572 | 1          | 0.2572 | 0 | 0 | 0 | 1      | Ref |
| MT670418 | Unassigned | Unassigned | Unassigned | 78_3    | Clustered           | 11 VC_78_3   | 11  | 0.2572 | 1          | 0.2572 | 0 | 0 | 0 | 1      | Ref |
| MT670419 | Unassigned | Unassigned | Unassigned | 78_3    | Clustered           | 11 VC_78_3   | 11  | 0.2572 | 1          | 0.2572 | 0 | 0 | 0 | 1      | Ref |
| MT670420 | Unassigned | Unassigned | Unassigned | 78_3    | Clustered           | 11 VC_78_3   | 11  | 0.2572 | 1          | 0.2572 | 0 | 0 | 0 | 1      | Ref |
| MT670421 | Unassigned | Unassigned | Unassigned | 78_3    | Clustered           | 11 VC_78_3   | 11  | 0.2572 | 1          | 0.2572 | 0 | 0 | 0 | 1      | Ref |
| MT670422 | Unassigned | Unassigned | Unassigned | 78_3    | Clustered           | 11 VC_78_3   | 11  | 0.2572 | 1          | 0.2572 | 0 | 0 | 0 | 1      | Ref |
| MT675124 | Unassigned | Unassigned | Unassigned | 592_0   | Clustered           | 50 VC_592_0  | 50  | 0.7314 | 1          | 0.7314 | 0 | 0 | 0 | 1      | Ref |
| MT675125 | Unassigned | Unassigned | Unassigned | 592_0   | Clustered           | 50 VC_592_0  | 50  | 0.7314 | 1          | 0.7314 | 0 | 0 | 0 | 1      | Ref |
| MT675126 | Unassigned | Unassigned | Unassigned | 592_0   | Clustered           | 50 VC_592_0  | 50  | 0.7314 | 1          | 0.7314 | 0 | 0 | 0 | 1      | Ref |
| MT677933 | Unassigned | Unassigned | Unassigned | 637_1   | Clustered           | 27 VC_637_1  | 27  | 0.2578 | 1          | 0.2578 | 0 | 0 | 0 | 0.9858 | Ref |
| MT677934 | Unassigned | Unassigned | Unassigned | 637_0   | Clustered           | 115 VC_637_0 | 115 | 0.731  | 1          | 0.731  | 0 | 0 | 0 | 0.8764 | Ref |
| MT679221 | Unassigned | Unassigned | Unassigned | 959_5   | Clustered           | 19 VC_959_5  | 19  | 0.2626 | 1          | 0.2626 | 0 | 0 | 0 | 1      | Ref |
| MT680615 | Unassigned | Unassigned | Unassigned | 452_0   | Clustered           | 66 VC_452_0  | 66  | 0.9248 | 1          | 0.9248 | 0 | 0 | 0 | 1      | Ref |
| MT681669 | Unassigned | Unassigned | Unassigned | 392_0   | Clustered           | 126 VC_392_0 | 126 | 0.9621 | 1          | 0.9621 | 0 | 0 | 0 | 1      | Ref |
| MT682064 | Unassigned | Unassigned | Unassigned | 460_0   | Clustered           | 19 VC_460_0  | 19  | 0.3744 | 1          | 0.3744 | 0 | 0 | 0 | 1      | Ref |
| MT682065 | Unassigned | Unassigned | Unassigned | 111_0   | Clustered           | 91 VC_111_0  | 91  | 0.9587 | 1          | 0.9587 | 0 | 0 | 0 | 1      | Ref |
| MT682386 | Unassigned | Unassigned | Unassigned | 878_0   | Clustered           | 32 VC_878_0  | 32  | 0.9965 | 1          | 0.9965 | 0 | 0 | 0 | 1      | Ref |
| MT682387 | Unassigned | Unassigned | Unassigned | 878_0   | Clustered           | 32 VC_878_0  | 32  | 0.9965 | 1          | 0.9965 | 0 | 0 | 0 | 1      | Ref |
| MT682388 | Unassigned | Unassigned | Unassigned | 878_0   | Clustered           | 32 VC_878_0  | 32  | 0.9965 | 1          | 0.9965 | 0 | 0 | 0 | 1      | Ref |
| MT682389 | Unassigned | Unassigned | Unassigned | 878_0   | Clustered           | 32 VC_878_0  | 32  | 0.9965 | 1          | 0.9965 | 0 | 0 | 0 | 1      | Ref |
| MT682390 | Unassigned | Unassigned | Unassigned | 878_0   | Clustered           | 32 VC_878_0  | 32  | 0.9965 | 1          | 0.9965 | 0 | 0 | 0 | 1      | Ref |
| MT682391 | Unassigned | Unassigned | Unassigned | 878_0   | Clustered           | 32 VC_878_0  | 32  | 0.9965 | 1          | 0.9965 | 0 | 0 | 0 | 1      | Ref |
| MT682705 | Unassigned | Unassigned | Unassigned | 722_0   | Clustered           | 13 VC_722_0  | 13  | 0.5104 | 1          | 0.5104 | 0 | 0 | 0 | 1      | Ref |
| MT682706 | Unassigned | Unassigned | Unassigned | 456_0   | Clustered           | 62 VC_456_0  | 62  | 0.9026 | 1          | 0.9026 | 0 | 0 | 0 | 1      | Ref |
| MT682707 | Unassigned | Unassigned | Unassigned | 451_0   | Clustered           | 80 VC_451_0  | 80  | 0.9991 | 1          | 0.9991 | 0 | 0 | 0 | 1      | Ref |
| MT682708 | Unassigned | Unassigned | Unassigned | 779_0   | Clustered           | 37 VC_779_0  | 37  | 0.5682 | 1          | 0.5682 | 0 | 0 | 0 | 1      | Ref |
| MT682709 | Unassigned | Unassigned | Unassigned | 283_171 | Clustered/Singleton | 1 VC_283_171 | 1   | 0      | 1          | 0      | 0 | 0 | 0 | 1      | Ref |
| MT682710 | Unassigned | Unassigned | Unassigned | 283_72  | Clustered/Singleton | 1 VC_283_72  | 1   | 0      | 1          | 0      | 0 | 0 | 0 | 1      | Ref |
| MT682711 | Unassigned | Unassigned | Unassigned | 290_5   | Clustered           | 14 VC_290_5  | 14  | 0.1422 | 1          | 0.1422 | 0 | 0 | 0 | 0.9231 | Ref |
| MT682712 | Unassigned | Unassigned | Unassigned | 283_77  | Clustered           | 2 VC_283_77  | 2   | 0.0025 | 0.95407419 | 0.0024 | 0 | 0 | 0 | 1      | Ref |
| MT682713 | Unassigned | Unassigned | Unassigned | 283_54  | Clustered/Singleton | 1 VC_283_54  | 1   | 0      | 1          | 0      | 0 | 0 | 0 | 1      | Ref |
| MT682714 | Unassigned | Unassigned | Unassigned | 283_74  | Clustered/Singleton | 1 VC_283_74  | 1   | 0      | 1          | 0      | 0 | 0 | 0 | 1      | Ref |
| MT682715 | Unassigned | Unassigned | Unassigned | 575_0   | Clustered           | 35 VC_575_0  | 35  | 0.8815 | 1          | 0.8815 | 0 | 0 | 0 | 1      | Ref |
| MT682716 | Unassigned | Unassigned | Unassigned | 772_20  | Clustered           | 2 VC_772_20  | 2   | 0.006  | 0.58868587 | 0.0035 | 0 | 0 | 0 | 1      | Ref |
| MT684586 | Unassigned | Unassigned | Unassigned | 520_47  | Clustered/Singleton | 1 VC_520_47  | 1   | 0      | 1          | 0      | 0 | 0 | 0 | 1      | Ref |
| MT684587 | Unassigned | Unassigned | Unassigned | 1360_0  | Clustered           | 31 VC_1360_0 | 31  | 0.8837 | 1          | 0.8837 | 0 | 0 | 0 | 1      | Ref |
| MT684588 | Unassigned | Unassigned | Unassigned | 521_0   | Clustered           | 37 VC_521_0  | 37  | 0.912  | 1          | 0.912  | 0 | 0 | 0 | 1      | Ref |
| MT684589 | Unassigned | Unassigned | Unassigned | 872_0   | Clustered           | 31 VC_872_0  | 31  | 0.8151 | 1          | 0.8151 | 0 | 0 | 0 | 0.8194 | Ref |
| MT684590 | Unassigned | Unassigned | Unassigned | 1071_2  | Clustered           | 5 VC_1071_2  | 5   | 0.0534 | 0.99997362 | 0.0534 | 0 | 0 | 0 | 0.9    | Ref |
| MT684591 | Unassigned | Unassigned | Unassigned | 1343_0  | Clustered           | 21 VC_1343_0 | 21  | 0.9843 | 1          | 0.9843 | 0 | 0 | 0 | 1      | Ref |
| MT684592 | Unassigned | Unassigned | Unassigned | 1343_0  | Clustered           | 21 VC_1343_0 | 21  | 0.9843 | 1          | 0.9843 | 0 | 0 | 0 | 1      | Ref |
| MT684593 | Unassigned | Unassigned | Unassigned | 520_15  | Clustered           | 2 VC_520_15  | 2   | 0.0078 | 0.957604   | 0.0075 | 0 | 0 | 0 | 0      | Ref |
| MT684594 | Unassigned | Unassigned | Unassigned | 810_0   | Clustered           | 18 VC_810_0  | 18  | 0.9121 | 1          | 0.9121 | 0 | 0 | 0 | 1      | Ref |
| MT684595 | Unassigned | Unassigned | Unassigned | 520_14  | Clustered/Singleton | 1 VC_520_14  | 1   | 0      | 1          | 0      | 0 | 0 | 0 | 1      | Ref |
| MT684596 | Unassigned | Unassigned | Unassigned | 1224_0  | Clustered           | 19 VC_1224_0 | 19  | 1      | 1          | 1      | 0 | 0 | 0 | 1      | Ref |
| MT684597 | Unassigned | Unassigned | Unassigned | 520_6   | Clustered           | 3 VC_520_6   | 3   | 0.0276 | 0.99859841 | 0.0276 | 0 | 0 | 0 | 1      | Ref |
| MT684598 | Unassigned | Unassigned | Unassigned | 1072_5  | Clustered           | 3 VC_1072_5  | 3   | 0.0475 | 0.98997321 | 0.047  | 0 | 0 | 0 | 1      | Ref |
| MT684599 | Unassigned | Unassigned | Unassigned | 890_1   | Clustered           | 4 VC_890_1   | 4   | 0.4613 | 0.99998458 | 0.4613 | 0 | 0 | 0 | 1      | Ref |
| MT684600 | Unassigned | Unassigned | Unassigned | 872_0   | Clustered           | 31 VC_872_0  | 31  | 0.8151 | 1          | 0.8151 | 0 | 0 | 0 | 0.8194 | Ref |
| MT684601 | Unassigned | Unassigned | Unassigned | 520_6   | Clustered           | 3 VC_520_6   | 3   | 0.0276 | 0.99859841 | 0.0276 | 0 | 0 | 0 | 1      | Ref |
| MT684602 | Unassigned | Unassigned | Unassigned | 568_0   | Clustered           | 8 VC_568_0   | 8   | 0.5738 | 1          | 0.5738 | 0 | 0 | 0 | 1      | Ref |
| MT701586 | Unassigned | Unassigned | Unassigned | 125_0   | Clustered           | 17 VC_125_0  | 17  | 0.9244 | 1          | 0.9244 | 0 | 0 | 0 | 1      | Ref |
| MT701587 | Unassigned | Unassigned | Unassigned | 242_1   | Clustered           | 20 VC_242_1  | 20  | 0.684  | 1          | 0.684  | 0 | 0 | 0 | 0.8368 | Ref |
| MT701588 | Unassigned | Unassigned | Unassigned | 491_0   | Clustered           | 36 VC_491_0  | 36  | 0.5336 | 1          | 0.5336 | 0 | 0 | 0 | 0.9714 | Ref |
| MT701589 | Unassigned | Unassigned | Unassigned | 111_0   | Clustered           | 91 VC_111_0  | 91  | 0.9587 | 1          | 0.9587 | 0 | 0 | 0 | 1      | Ref |
| MT701591 | Unassigned | Unassigned | Unassigned | 1_0     | Clustered           | 54 VC_1_0    | 54  | 0.8527 | 1          | 0.8527 | 0 | 0 | 0 | 1      | Ref |
| MT701592 | Unassigned | Unassigned | Unassigned | 937_0   | Clustered           | 40 VC_937_0  | 40  | 0.6809 | 1          | 0.6809 | 0 | 0 | 0 | 0.9359 | Ref |
| MT701593 | Unassigned | Unassigned | Unassigned | 376_0   | Clustered           | 3 VC_376_0   | 3   | 0.2389 | 0.99789919 | 0.2384 | 0 | 0 | 0 | 1      | Ref |



|          |            |            |            |        |                     |              |     |        |            |        |   |   |   |            |
|----------|------------|------------|------------|--------|---------------------|--------------|-----|--------|------------|--------|---|---|---|------------|
| MT701594 | Unassigned | Unassigned | Unassigned | 981_1  | Clustered           | 26 VC_981_1  | 26  | 0.7009 | 1          | 0.7009 | 0 | 0 | 0 | 1 Ref      |
| MT701595 | Unassigned | Unassigned | Unassigned | 376_0  | Clustered           | 3 VC_376_0   | 3   | 0.2389 | 0.99789919 | 0.2384 | 0 | 0 | 0 | 1 Ref      |
| MT701596 | Unassigned | Unassigned | Unassigned | 376_0  | Clustered           | 3 VC_376_0   | 3   | 0.2389 | 0.99789919 | 0.2384 | 0 | 0 | 0 | 1 Ref      |
| MT701597 | Unassigned | Unassigned | Unassigned | 981_1  | Clustered           | 26 VC_981_1  | 26  | 0.7009 | 1          | 0.7009 | 0 | 0 | 0 | 1 Ref      |
| MT701598 | Unassigned | Unassigned | Unassigned | 982_0  | Clustered           | 62 VC_982_0  | 62  | 0.8646 | 1          | 0.8646 | 0 | 0 | 0 | 0.743 Ref  |
| MT708544 | Unassigned | Unassigned | Unassigned | 987_0  | Clustered           | 22 VC_987_0  | 22  | 0.8955 | 1          | 0.8955 | 0 | 0 | 0 | 1 Ref      |
| MT708545 | Unassigned | Unassigned | Unassigned | 481_0  | Clustered           | 8 VC_481_0   | 8   | 0.1348 | 1          | 0.1348 | 0 | 0 | 0 | 1 Ref      |
| MT708546 | Unassigned | Unassigned | Unassigned | 987_0  | Clustered           | 22 VC_987_0  | 22  | 0.8955 | 1          | 0.8955 | 0 | 0 | 0 | 1 Ref      |
| MT708547 | Unassigned | Unassigned | Unassigned | 164_10 | Clustered           | 5 VC_164_10  | 5   | 0.0615 | 0.96483582 | 0.0593 | 0 | 0 | 0 | 1 Ref      |
| MT708548 | Unassigned | Unassigned | Unassigned | 981_1  | Clustered           | 26 VC_981_1  | 26  | 0.7009 | 1          | 0.7009 | 0 | 0 | 0 | 1 Ref      |
| MT708549 | Unassigned | Unassigned | Unassigned | 536_0  | Clustered           | 3 VC_536_0   | 3   | 0.0878 | 0.9985359  | 0.0877 | 0 | 0 | 0 | 1 Ref      |
| MT708550 | Unassigned | Unassigned | Unassigned | 125_0  | Clustered           | 17 VC_125_0  | 17  | 0.9244 | 1          | 0.9244 | 0 | 0 | 0 | 1 Ref      |
| MT710307 | Unassigned | Unassigned | Unassigned | 959_1  | Clustered           | 8 VC_959_1   | 8   | 0.0878 | 0.98435099 | 0.0864 | 0 | 0 | 0 | 1 Ref      |
| MT711523 | Unassigned | Unassigned | Unassigned | 638_0  | Clustered           | 45 VC_638_0  | 45  | 0.7741 | 1          | 0.7741 | 0 | 0 | 0 | 1 Ref      |
| MT711524 | Unassigned | Unassigned | Unassigned | 638_0  | Clustered           | 45 VC_638_0  | 45  | 0.7741 | 1          | 0.7741 | 0 | 0 | 0 | 1 Ref      |
| MT711525 | Unassigned | Unassigned | Unassigned | 638_0  | Clustered           | 45 VC_638_0  | 45  | 0.7741 | 1          | 0.7741 | 0 | 0 | 0 | 1 Ref      |
| MT711526 | Unassigned | Unassigned | Unassigned | 638_0  | Clustered           | 45 VC_638_0  | 45  | 0.7741 | 1          | 0.7741 | 0 | 0 | 0 | 1 Ref      |
| MT711527 | Unassigned | Unassigned | Unassigned | 638_0  | Clustered           | 45 VC_638_0  | 45  | 0.7741 | 1          | 0.7741 | 0 | 0 | 0 | 1 Ref      |
| MT711528 | Unassigned | Unassigned | Unassigned | 638_0  | Clustered           | 45 VC_638_0  | 45  | 0.7741 | 1          | 0.7741 | 0 | 0 | 0 | 1 Ref      |
| MT711887 | Unassigned | Unassigned | Unassigned | 130_0  | Clustered           | 19 VC_130_0  | 19  | 0.6068 | 1          | 0.6068 | 0 | 0 | 0 | 1 Ref      |
| MT711888 | Unassigned | Unassigned | Unassigned | 127_2  | Clustered/Singleton | 1 VC_127_2   | 1   | 0      | 1          | 0      | 0 | 0 | 0 | 1 Ref      |
| MT711889 | Unassigned | Unassigned | Unassigned | 129_0  | Clustered           | 43 VC_129_0  | 43  | 0.886  | 1          | 0.886  | 0 | 0 | 0 | 1 Ref      |
| MT711890 | Unassigned | Unassigned | Unassigned | 129_0  | Clustered           | 43 VC_129_0  | 43  | 0.886  | 1          | 0.886  | 0 | 0 | 0 | 1 Ref      |
| MT711975 | Unassigned | Unassigned | Unassigned | 727_0  | Clustered           | 11 VC_727_0  | 11  | 0.5054 | 1          | 0.5054 | 0 | 0 | 0 | 1 Ref      |
| MT711976 | Unassigned | Unassigned | Unassigned | 1071_5 | Clustered/Singleton | 1 VC_1071_5  | 1   | 0      | 1          | 0      | 0 | 0 | 0 | 1 Ref      |
| MT711978 | Unassigned | Unassigned | Unassigned | 982_0  | Clustered           | 62 VC_982_0  | 62  | 0.8646 | 1          | 0.8646 | 0 | 0 | 0 | 0.743 Ref  |
| MT711979 | Unassigned | Unassigned | Unassigned | 982_0  | Clustered           | 62 VC_982_0  | 62  | 0.8646 | 1          | 0.8646 | 0 | 0 | 0 | 0.743 Ref  |
| MT713136 | Unassigned | Unassigned | Unassigned | 443_2  | Clustered           | 10 VC_443_2  | 10  | 0.3344 | 1          | 0.3344 | 0 | 0 | 0 | 0.9333 Ref |
| MT720689 | Unassigned | Unassigned | Unassigned | 909_0  | Clustered           | 5 VC_909_0   | 5   | 0.7406 | 0.9999861  | 0.7406 | 0 | 0 | 0 | 1 Ref      |
| MT723932 | Unassigned | Unassigned | Unassigned | 521_0  | Clustered           | 37 VC_521_0  | 37  | 0.912  | 1          | 0.912  | 0 | 0 | 0 | 1 Ref      |
| MT723933 | Unassigned | Unassigned | Unassigned | 728_0  | Clustered           | 3 VC_728_0   | 3   | 0.4017 | 0.99850259 | 0.4011 | 0 | 0 | 0 | 1 Ref      |
| MT723934 | Unassigned | Unassigned | Unassigned | 1093_0 | Clustered           | 40 VC_1093_0 | 40  | 0.8754 | 1          | 0.8754 | 0 | 0 | 0 | 1 Ref      |
| MT723935 | Unassigned | Unassigned | Unassigned | 1176_0 | Clustered           | 41 VC_1176_0 | 41  | 0.9558 | 1          | 0.9558 | 0 | 0 | 0 | 0.9976 Ref |
| MT723936 | Unassigned | Unassigned | Unassigned | 1176_0 | Clustered           | 41 VC_1176_0 | 41  | 0.9558 | 1          | 0.9558 | 0 | 0 | 0 | 0.9976 Ref |
| MT723937 | Unassigned | Unassigned | Unassigned | 1093_0 | Clustered           | 40 VC_1093_0 | 40  | 0.8754 | 1          | 0.8754 | 0 | 0 | 0 | 1 Ref      |
| MT723938 | Unassigned | Unassigned | Unassigned | 525_0  | Clustered           | 25 VC_525_0  | 25  | 0.4597 | 1          | 0.4597 | 0 | 0 | 0 | 1 Ref      |
| MT723939 | Unassigned | Unassigned | Unassigned | 517_1  | Clustered           | 108 VC_517_1 | 108 | 0.8483 | 1          | 0.8483 | 0 | 0 | 0 | 0.9955 Ref |
| MT723940 | Unassigned | Unassigned | Unassigned | 237_1  | Clustered           | 13 VC_237_1  | 13  | 0.1773 | 1          | 0.1773 | 0 | 0 | 0 | 0.7308 Ref |
| MT723941 | Unassigned | Unassigned | Unassigned | 1093_0 | Clustered           | 40 VC_1093_0 | 40  | 0.8754 | 1          | 0.8754 | 0 | 0 | 0 | 1 Ref      |
| MT723942 | Unassigned | Unassigned | Unassigned | 1176_0 | Clustered           | 41 VC_1176_0 | 41  | 0.9558 | 1          | 0.9558 | 0 | 0 | 0 | 0.9976 Ref |
| MT723943 | Unassigned | Unassigned | Unassigned | 551_0  | Clustered           | 16 VC_551_0  | 16  | 0.0915 | 1          | 0.0915 | 0 | 0 | 0 | 0.6667 Ref |
| MT723944 | Unassigned | Unassigned | Unassigned | 558_39 | Clustered           | 3 VC_558_39  | 3   | 0.0063 | 0.73849574 | 0.0047 | 0 | 0 | 0 | 0.6667 Ref |
| MT723945 | Unassigned | Unassigned | Unassigned | 558_21 | Clustered/Singleton | 1 VC_558_21  | 1   | 0      | 1          | 0      | 0 | 0 | 0 | 1 Ref      |
| MT732432 | Unassigned | Unassigned | Unassigned | 1019_0 | Clustered           | 5 VC_1019_0  | 5   | 0.866  | 0.99999999 | 0.866  | 0 | 0 | 0 | 1 Ref      |
| MT732433 | Unassigned | Unassigned | Unassigned | 1019_0 | Clustered           | 5 VC_1019_0  | 5   | 0.866  | 0.99999999 | 0.866  | 0 | 0 | 0 | 1 Ref      |
| MT732434 | Unassigned | Unassigned | Unassigned | 1019_0 | Clustered           | 5 VC_1019_0  | 5   | 0.866  | 0.99999999 | 0.866  | 0 | 0 | 0 | 1 Ref      |
| MT732435 | Unassigned | Unassigned | Unassigned | 1016_0 | Clustered           | 8 VC_1016_0  | 8   | 0.9481 | 1          | 0.9481 | 0 | 0 | 0 | 1 Ref      |
| MT732436 | Unassigned | Unassigned | Unassigned | 1016_0 | Clustered           | 8 VC_1016_0  | 8   | 0.9481 | 1          | 0.9481 | 0 | 0 | 0 | 1 Ref      |
| MT732437 | Unassigned | Unassigned | Unassigned | 1016_0 | Clustered           | 8 VC_1016_0  | 8   | 0.9481 | 1          | 0.9481 | 0 | 0 | 0 | 1 Ref      |
| MT732438 | Unassigned | Unassigned | Unassigned | 1016_0 | Clustered           | 8 VC_1016_0  | 8   | 0.9481 | 1          | 0.9481 | 0 | 0 | 0 | 1 Ref      |
| MT732439 | Unassigned | Unassigned | Unassigned | 1016_0 | Clustered           | 8 VC_1016_0  | 8   | 0.9481 | 1          | 0.9481 | 0 | 0 | 0 | 1 Ref      |
| MT732440 | Unassigned | Unassigned | Unassigned | 1016_0 | Clustered           | 8 VC_1016_0  | 8   | 0.9481 | 1          | 0.9481 | 0 | 0 | 0 | 1 Ref      |
| MT732441 | Unassigned | Unassigned | Unassigned | 1016_0 | Clustered           | 8 VC_1016_0  | 8   | 0.9481 | 1          | 0.9481 | 0 | 0 | 0 | 1 Ref      |
| MT732442 | Unassigned | Unassigned | Unassigned | 1016_0 | Clustered           | 8 VC_1016_0  | 8   | 0.9481 | 1          | 0.9481 | 0 | 0 | 0 | 1 Ref      |
| MT732443 | Unassigned | Unassigned | Unassigned | 445_0  | Clustered           | 2 VC_445_0   | 2   | 0.3978 | 0.92263554 | 0.3671 | 0 | 0 | 0 | 1 Ref      |
| MT732444 | Unassigned | Unassigned | Unassigned | 445_0  | Clustered           | 2 VC_445_0   | 2   | 0.3978 | 0.92263554 | 0.3671 | 0 | 0 | 0 | 1 Ref      |
| MT732445 | Unassigned | Unassigned | Unassigned | 1011_0 | Clustered           | 9 VC_1011_0  | 9   | 1      | 1          | 1      | 0 | 0 | 0 | 1 Ref      |
| MT732446 | Unassigned | Unassigned | Unassigned | 1011_0 | Clustered           | 9 VC_1011_0  | 9   | 1      | 1          | 1      | 0 | 0 | 0 | 1 Ref      |
| MT732447 | Unassigned | Unassigned | Unassigned | 1011_0 | Clustered           | 9 VC_1011_0  | 9   | 1      | 1          | 1      | 0 | 0 | 0 | 1 Ref      |
| MT732448 | Unassigned | Unassigned | Unassigned | 1011_0 | Clustered           | 9 VC_1011_0  | 9   | 1      | 1          | 1      | 0 | 0 | 0 | 1 Ref      |
| MT732449 | Unassigned | Unassigned | Unassigned | 1011_0 | Clustered           | 9 VC_1011_0  | 9   | 1      | 1          | 1      | 0 | 0 | 0 | 1 Ref      |
| MT732450 | Unassigned | Unassigned | Unassigned | 1438_0 | Clustered           | 6 VC_1438_0  | 6   | 1      | 0          | 0      | 0 | 0 | 0 | 1 Ref      |
| MT732451 | Unassigned | Unassigned | Unassigned | 1438_0 | Clustered           | 6 VC_1438_0  | 6   | 1      | 0          | 0      | 0 | 0 | 0 | 1 Ref      |
| MT732452 | Unassigned | Unassigned | Unassigned | 1438_0 | Clustered           | 6 VC_1438_0  | 6   | 1      | 0          | 0      | 0 | 0 | 0 | 1 Ref      |
| MT732453 | Unassigned | Unassigned | Unassigned | 1438_0 | Clustered           | 6 VC_1438_0  | 6   | 1      | 0          | 0      | 0 | 0 | 0 | 1 Ref      |
| MT732454 | Unassigned | Unassigned | Unassigned | 1438_0 | Clustered           | 6 VC_1438_0  | 6   | 1      | 0          | 0      | 0 | 0 | 0 | 1 Ref      |
| MT732455 | Unassigned | Unassigned | Unassigned | 1438_0 | Clustered           | 6 VC_1438_0  | 6   | 1      | 0          | 0      | 0 | 0 | 0 | 1 Ref      |
| MT732458 | Unassigned | Unassigned | Unassigned | 1417_0 | Clustered           | 15 VC_1417_0 | 15  | 0.9982 | 1          | 0.9982 | 0 | 0 | 0 | 1 Ref      |
| MT732459 | Unassigned | Unassigned | Unassigned | 1417_0 | Clustered           | 15 VC_1417_0 | 15  | 0.9982 | 1          | 0.9982 | 0 | 0 | 0 | 1 Ref      |
| MT732460 | Unassigned | Unassigned | Unassigned | 1417_0 | Clustered           | 15 VC_1417_0 | 15  | 0.9982 | 1          | 0.9982 | 0 | 0 | 0 | 1 Ref      |
| MT732461 | Unassigned | Unassigned | Unassigned | 1417_0 | Clustered           | 15 VC_1417_0 | 15  | 0.9982 | 1          | 0.9982 | 0 | 0 | 0 | 1 Ref      |
| MT732462 | Unassigned | Unassigned | Unassigned | 1417_0 | Clustered           | 15 VC_1417_0 | 15  | 0.9982 | 1          | 0.9982 | 0 | 0 | 0 | 1 Ref      |
| MT732463 | Unassigned | Unassigned | Unassigned | 1417_0 | Clustered           | 15 VC_1417_0 | 15  | 0.9982 | 1          | 0.9982 | 0 | 0 | 0 | 1 Ref      |
| MT732464 | Unassigned | Unassigned | Unassigned | 1417_0 | Clustered           | 15 VC_1417_0 | 15  | 0.9982 | 1          | 0.9982 | 0 | 0 | 0 | 1 Ref      |
| MT732465 | Unassigned | Unassigned | Unassigned | 1417_0 | Clustered           | 15 VC_1417_0 | 15  | 0.9982 | 1          | 0.9982 | 0 | 0 | 0 | 1 Ref      |
| MT732466 | Unassigned | Unassigned | Unassigned | 1417_0 | Clustered           | 15 VC_1417_0 | 15  | 0.9982 | 1          | 0.9982 | 0 | 0 | 0 | 1 Ref      |
| MT732467 | Unassigned | Unassigned | Unassigned | 1417_0 | Clustered           | 15 VC_1417_0 | 15  | 0.9982 | 1          | 0.9982 | 0 | 0 | 0 | 1 Ref      |
| MT732468 | Unassigned | Unassigned | Unassigned | 1417_0 | Clustered           | 15 VC_1417_0 | 15  | 0.9982 | 1          | 0.9982 | 0 | 0 | 0 | 1 Ref      |
| MT732469 | Unassigned | Unassigned | Unassigned | 1417_0 | Clustered           | 15 VC_1417_0 | 15  | 0.9982 | 1          | 0.9982 | 0 | 0 | 0 | 1 Ref      |
| MT732470 | Unassigned | Unassigned | Unassigned | 1417_0 | Clustered           | 15 VC_1417_0 | 15  | 0.9982 | 1          | 0.9982 | 0 | 0 | 0 | 1 Ref      |
| MT732471 | Unassigned | Unassigned | Unassigned | 1417_0 | Clustered           | 15 VC_1417_0 | 15  | 0.9982 | 1          | 0.9982 | 0 | 0 | 0 | 1 Ref      |



|          |            |            |            |        |                     |              |     |        |            |        |   |   |   |            |
|----------|------------|------------|------------|--------|---------------------|--------------|-----|--------|------------|--------|---|---|---|------------|
| MT732472 | Unassigned | Unassigned | Unassigned | 1417_0 | Clustered           | 15 VC_1417_0 | 15  | 0.9982 | 1          | 0.9982 | 0 | 0 | 0 | 1 Ref      |
| MT735629 | Unassigned | Unassigned | Unassigned | 904_0  | Clustered           | 6 VC_904_0   | 6   | 0.233  | 1          | 0.233  | 0 | 0 | 0 | 1 Ref      |
| MT740244 | Unassigned | Unassigned | Unassigned | 812_1  | Clustered           | 4 VC_812_1   | 4   | 0.2266 | 0.99998426 | 0.2266 | 0 | 0 | 0 | 1 Ref      |
| MT740291 | Unassigned | Unassigned | Unassigned | 637_0  | Clustered           | 115 VC_637_0 | 115 | 0.731  | 1          | 0.731  | 0 | 0 | 0 | 0.8764 Ref |
| MT740314 | Unassigned | Unassigned | Unassigned | 772_5  | Clustered/Singleton | 1 VC_772_5   | 1   | 0      | 1          | 0      | 0 | 0 | 0 | 1 Ref      |
| MT740726 | Unassigned | Unassigned | Unassigned | 1205_0 | Clustered           | 3 VC_1205_0  | 3   | 0.9212 | 0.99501814 | 0.9166 | 0 | 0 | 0 | 1 Ref      |
| MT740727 | Unassigned | Unassigned | Unassigned | 162_0  | Clustered           | 18 VC_162_0  | 18  | 0.7403 | 1          | 0.7403 | 0 | 0 | 0 | 0.8627 Ref |
| MT740728 | Unassigned | Unassigned | Unassigned | 70_0   | Clustered           | 27 VC_70_0   | 27  | 0.5981 | 1          | 0.5981 | 0 | 0 | 0 | 0.9886 Ref |
| MT740730 | Unassigned | Unassigned | Unassigned | 162_0  | Clustered           | 18 VC_162_0  | 18  | 0.7403 | 1          | 0.7403 | 0 | 0 | 0 | 0.8627 Ref |
| MT740731 | Unassigned | Unassigned | Unassigned | 162_0  | Clustered           | 18 VC_162_0  | 18  | 0.7403 | 1          | 0.7403 | 0 | 0 | 0 | 0.8627 Ref |
| MT740732 | Unassigned | Unassigned | Unassigned | 162_0  | Clustered           | 18 VC_162_0  | 18  | 0.7403 | 1          | 0.7403 | 0 | 0 | 0 | 0.8627 Ref |
| MT740733 | Unassigned | Unassigned | Unassigned | 162_0  | Clustered           | 18 VC_162_0  | 18  | 0.7403 | 1          | 0.7403 | 0 | 0 | 0 | 0.8627 Ref |
| MT740734 | Unassigned | Unassigned | Unassigned | 357_0  | Clustered           | 53 VC_357_0  | 53  | 0.8979 | 1          | 0.8979 | 0 | 0 | 0 | 1 Ref      |
| MT740736 | Unassigned | Unassigned | Unassigned | 162_0  | Clustered           | 18 VC_162_0  | 18  | 0.7403 | 1          | 0.7403 | 0 | 0 | 0 | 0.8627 Ref |
| MT740737 | Unassigned | Unassigned | Unassigned | 161_0  | Clustered           | 3 VC_161_0   | 3   | 0.5777 | 0.99804396 | 0.5765 | 0 | 0 | 0 | 1 Ref      |
| MT740738 | Unassigned | Unassigned | Unassigned | 162_0  | Clustered           | 18 VC_162_0  | 18  | 0.7403 | 1          | 0.7403 | 0 | 0 | 0 | 0.8627 Ref |
| MT740739 | Unassigned | Unassigned | Unassigned | 162_0  | Clustered           | 18 VC_162_0  | 18  | 0.7403 | 1          | 0.7403 | 0 | 0 | 0 | 0.8627 Ref |
| MT740740 | Unassigned | Unassigned | Unassigned | 162_0  | Clustered           | 18 VC_162_0  | 18  | 0.7403 | 1          | 0.7403 | 0 | 0 | 0 | 0.8627 Ref |
| MT740741 | Unassigned | Unassigned | Unassigned | 161_0  | Clustered           | 3 VC_161_0   | 3   | 0.5777 | 0.99804396 | 0.5765 | 0 | 0 | 0 | 1 Ref      |
| MT740742 | Unassigned | Unassigned | Unassigned | 162_0  | Clustered           | 18 VC_162_0  | 18  | 0.7403 | 1          | 0.7403 | 0 | 0 | 0 | 0.8627 Ref |
| MT740743 | Unassigned | Unassigned | Unassigned | 1205_0 | Clustered           | 3 VC_1205_0  | 3   | 0.9212 | 0.99501814 | 0.9166 | 0 | 0 | 0 | 1 Ref      |
| MT740745 | Unassigned | Unassigned | Unassigned | 1205_0 | Clustered           | 3 VC_1205_0  | 3   | 0.9212 | 0.99501814 | 0.9166 | 0 | 0 | 0 | 1 Ref      |
| MT741943 | Unassigned | Unassigned | Unassigned | 492_1  | Clustered           | 20 VC_492_1  | 20  | 0.4176 | 1          | 0.4176 | 0 | 0 | 0 | 1 Ref      |
| MT741944 | Unassigned | Unassigned | Unassigned | 699_0  | Clustered           | 71 VC_699_0  | 71  | 0.9352 | 1          | 0.9352 | 0 | 0 | 0 | 1 Ref      |
| MT745954 | Unassigned | Unassigned | Unassigned | 704_0  | Clustered           | 16 VC_704_0  | 16  | 0.7274 | 1          | 0.7274 | 0 | 0 | 0 | 1 Ref      |
| MT745955 | Unassigned | Unassigned | Unassigned | 704_0  | Clustered           | 16 VC_704_0  | 16  | 0.7274 | 1          | 0.7274 | 0 | 0 | 0 | 1 Ref      |
| MT745956 | Unassigned | Unassigned | Unassigned | 704_0  | Clustered           | 16 VC_704_0  | 16  | 0.7274 | 1          | 0.7274 | 0 | 0 | 0 | 1 Ref      |
| MT747434 | Unassigned | Unassigned | Unassigned | 967_0  | Clustered           | 16 VC_967_0  | 16  | 0.8971 | 1          | 0.8971 | 0 | 0 | 0 | 1 Ref      |
| MT757392 | Unassigned | Unassigned | Unassigned | 123_0  | Clustered           | 23 VC_123_0  | 23  | 0.817  | 1          | 0.817  | 0 | 0 | 0 | 1 Ref      |
| MT757399 | Unassigned | Unassigned | Unassigned | 967_0  | Clustered           | 16 VC_967_0  | 16  | 0.8971 | 1          | 0.8971 | 0 | 0 | 0 | 1 Ref      |
| MT758688 | Unassigned | Unassigned | Unassigned | 888_0  | Clustered           | 28 VC_888_0  | 28  | 0.5497 | 1          | 0.5497 | 0 | 0 | 0 | 1 Ref      |
| MT758689 | Unassigned | Unassigned | Unassigned | 93_0   | Clustered           | 2 VC_93_0    | 2   | 0.1063 | 0.95665672 | 0.1017 | 0 | 0 | 0 | 1 Ref      |
| MT764206 | Unassigned | Unassigned | Unassigned | 283_80 | Clustered/Singleton | 1 VC_283_80  | 1   | 0      | 1          | 0      | 0 | 0 | 0 | 1 Ref      |
| MT764207 | Unassigned | Unassigned | Unassigned | 428_0  | Clustered           | 33 VC_428_0  | 33  | 0.9915 | 1          | 0.9915 | 0 | 0 | 0 | 1 Ref      |
| MT764208 | Unassigned | Unassigned | Unassigned | 590_0  | Clustered           | 27 VC_590_0  | 27  | 0.9947 | 1          | 0.9947 | 0 | 0 | 0 | 1 Ref      |
| MT767883 | Unassigned | Unassigned | Unassigned | 754_0  | Clustered           | 8 VC_754_0   | 8   | 0.752  | 1          | 0.752  | 0 | 0 | 0 | 1 Ref      |
| MT768059 | Unassigned | Unassigned | Unassigned | 428_0  | Clustered           | 33 VC_428_0  | 33  | 0.9915 | 1          | 0.9915 | 0 | 0 | 0 | 1 Ref      |
| MT768060 | Unassigned | Unassigned | Unassigned | 461_0  | Clustered           | 96 VC_461_0  | 96  | 0.9307 | 1          | 0.9307 | 0 | 0 | 0 | 0.9575 Ref |
| MT770738 | Unassigned | Unassigned | Unassigned | 724_0  | Clustered           | 3 VC_724_0   | 3   | 0.1586 | 0.99815158 | 0.1583 | 0 | 0 | 0 | 1 Ref      |
| MT771339 | Unassigned | Unassigned | Unassigned | 1161_0 | Clustered           | 2 VC_1161_0  | 2   | 0.0296 | 0.95737719 | 0.0283 | 0 | 0 | 0 | 1 Ref      |
| MT771340 | Unassigned | Unassigned | Unassigned | 325_59 | Clustered/Singleton | 1 VC_325_59  | 1   | 0      | 1          | 0      | 0 | 0 | 0 | 1 Ref      |
| MT771341 | Unassigned | Unassigned | Unassigned | 1177_0 | Clustered           | 14 VC_1177_0 | 14  | 0.7847 | 1          | 0.7847 | 0 | 0 | 0 | 0.989 Ref  |
| MT771342 | Unassigned | Unassigned | Unassigned | 1175_0 | Clustered           | 22 VC_1175_0 | 22  | 0.4562 | 1          | 0.4562 | 0 | 0 | 0 | 1 Ref      |
| MT771344 | Unassigned | Unassigned | Unassigned | 1360_0 | Clustered           | 31 VC_1360_0 | 31  | 0.8837 | 1          | 0.8837 | 0 | 0 | 0 | 1 Ref      |
| MT771345 | Unassigned | Unassigned | Unassigned | 570_0  | Clustered           | 9 VC_570_0   | 9   | 0.499  | 1          | 0.499  | 0 | 0 | 0 | 1 Ref      |
| MT771347 | Unassigned | Unassigned | Unassigned | 1043_0 | Clustered           | 2 VC_1043_0  | 2   | 0.0576 | 0.95654247 | 0.0551 | 0 | 0 | 0 | 1 Ref      |
| MT771348 | Unassigned | Unassigned | Unassigned | 570_0  | Clustered           | 9 VC_570_0   | 9   | 0.499  | 1          | 0.499  | 0 | 0 | 0 | 1 Ref      |
| MT771349 | Unassigned | Unassigned | Unassigned | 887_0  | Clustered           | 18 VC_887_0  | 18  | 0.3663 | 1          | 0.3663 | 0 | 0 | 0 | 1 Ref      |
| MT771350 | Unassigned | Unassigned | Unassigned | 1240_0 | Clustered           | 82 VC_1240_0 | 82  | 0.7945 | 1          | 0.7945 | 0 | 0 | 0 | 1 Ref      |
| MT774375 | Unassigned | Unassigned | Unassigned | 502_1  | Clustered           | 6 VC_502_1   | 6   | 0.234  | 1          | 0.234  | 0 | 0 | 0 | 1 Ref      |
| MT774376 | Unassigned | Unassigned | Unassigned | 502_1  | Clustered           | 6 VC_502_1   | 6   | 0.234  | 1          | 0.234  | 0 | 0 | 0 | 1 Ref      |
| MT774378 | Unassigned | Unassigned | Unassigned | 1018_1 | Clustered           | 10 VC_1018_1 | 10  | 0.7518 | 1          | 0.7518 | 0 | 0 | 0 | 0.8 Ref    |
| MT774379 | Unassigned | Unassigned | Unassigned | 502_1  | Clustered           | 6 VC_502_1   | 6   | 0.234  | 1          | 0.234  | 0 | 0 | 0 | 1 Ref      |
| MT774380 | Unassigned | Unassigned | Unassigned | 502_1  | Clustered           | 6 VC_502_1   | 6   | 0.234  | 1          | 0.234  | 0 | 0 | 0 | 1 Ref      |
| MT774381 | Unassigned | Unassigned | Unassigned | 673_0  | Clustered           | 15 VC_673_0  | 15  | 0.8234 | 1          | 0.8234 | 0 | 0 | 0 | 0.7619 Ref |
| MT774382 | Unassigned | Unassigned | Unassigned | 502_1  | Clustered           | 6 VC_502_1   | 6   | 0.234  | 1          | 0.234  | 0 | 0 | 0 | 1 Ref      |
| MT774383 | Unassigned | Unassigned | Unassigned | 673_0  | Clustered           | 15 VC_673_0  | 15  | 0.8234 | 1          | 0.8234 | 0 | 0 | 0 | 0.7619 Ref |
| MT774384 | Unassigned | Unassigned | Unassigned | 673_0  | Clustered           | 15 VC_673_0  | 15  | 0.8234 | 1          | 0.8234 | 0 | 0 | 0 | 0.7619 Ref |
| MT774385 | Unassigned | Unassigned | Unassigned | 1018_1 | Clustered           | 10 VC_1018_1 | 10  | 0.7518 | 1          | 0.7518 | 0 | 0 | 0 | 0.8 Ref    |
| MT774386 | Unassigned | Unassigned | Unassigned | 673_0  | Clustered           | 15 VC_673_0  | 15  | 0.8234 | 1          | 0.8234 | 0 | 0 | 0 | 0.7619 Ref |
| MT774387 | Unassigned | Unassigned | Unassigned | 1018_1 | Clustered           | 10 VC_1018_1 | 10  | 0.7518 | 1          | 0.7518 | 0 | 0 | 0 | 0.8 Ref    |
| MT774388 | Unassigned | Unassigned | Unassigned | 1018_1 | Clustered           | 10 VC_1018_1 | 10  | 0.7518 | 1          | 0.7518 | 0 | 0 | 0 | 0.8 Ref    |
| MT774389 | Unassigned | Unassigned | Unassigned | 1018_0 | Clustered           | 2 VC_1018_0  | 2   | 0.0851 | 0.94401932 | 0.0804 | 0 | 0 | 0 | 1 Ref      |
| MT774390 | Unassigned | Unassigned | Unassigned | 1018_1 | Clustered           | 10 VC_1018_1 | 10  | 0.7518 | 1          | 0.7518 | 0 | 0 | 0 | 0.8 Ref    |
| MT774391 | Unassigned | Unassigned | Unassigned | 1018_1 | Clustered           | 10 VC_1018_1 | 10  | 0.7518 | 1          | 0.7518 | 0 | 0 | 0 | 0.8 Ref    |
| MT774392 | Unassigned | Unassigned | Unassigned | 1018_1 | Clustered           | 10 VC_1018_1 | 10  | 0.7518 | 1          | 0.7518 | 0 | 0 | 0 | 0.8 Ref    |
| MT774393 | Unassigned | Unassigned | Unassigned | 675_0  | Clustered           | 2 VC_675_0   | 2   | 0.081  | 0.95018582 | 0.077  | 0 | 0 | 0 | 1 Ref      |
| MT774394 | Unassigned | Unassigned | Unassigned | 673_0  | Clustered           | 15 VC_673_0  | 15  | 0.8234 | 1          | 0.8234 | 0 | 0 | 0 | 0.7619 Ref |
| MT774395 | Unassigned | Unassigned | Unassigned | 502_4  | Clustered           | 3 VC_502_4   | 3   | 0.0997 | 0.99715347 | 0.0994 | 0 | 0 | 0 | 1 Ref      |
| MT774396 | Unassigned | Unassigned | Unassigned | 502_5  | Clustered           | 2 VC_502_5   | 2   | 0.0539 | 0.93577964 | 0.0505 | 0 | 0 | 0 | 1 Ref      |
| MT774397 | Unassigned | Unassigned | Unassigned | 502_4  | Clustered           | 3 VC_502_4   | 3   | 0.0997 | 0.99715347 | 0.0994 | 0 | 0 | 0 | 1 Ref      |
| MT774398 | Unassigned | Unassigned | Unassigned | 502_4  | Clustered           | 3 VC_502_4   | 3   | 0.0997 | 0.99715347 | 0.0994 | 0 | 0 | 0 | 1 Ref      |
| MT774399 | Unassigned | Unassigned | Unassigned | 502_3  | Clustered           | 2 VC_502_3   | 2   | 0.0724 | 0.95171362 | 0.0689 | 0 | 0 | 0 | 1 Ref      |
| MT774400 | Unassigned | Unassigned | Unassigned | 502_7  | Clustered/Singleton | 1 VC_502_7   | 1   | 0      | 1          | 0      | 0 | 0 | 0 | 1 Ref      |
| MT774401 | Unassigned | Unassigned | Unassigned | 502_2  | Clustered/Singleton | 1 VC_502_2   | 1   | 0      | 1          | 0      | 0 | 0 | 0 | 1 Ref      |
| MT774403 | Unassigned | Unassigned | Unassigned | 502_3  | Clustered           | 2 VC_502_3   | 2   | 0.0724 | 0.95171362 | 0.0689 | 0 | 0 | 0 | 1 Ref      |
| MT774404 | Unassigned | Unassigned | Unassigned | 502_6  | Clustered           | 2 VC_502_6   | 2   | 0.0804 | 0.95171362 | 0.0765 | 0 | 0 | 0 | 1 Ref      |
| MT774405 | Unassigned | Unassigned | Unassigned | 502_5  | Clustered           | 2 VC_502_5   | 2   | 0.0539 | 0.93577964 | 0.0505 | 0 | 0 | 0 | 1 Ref      |
| MT774407 | Unassigned | Unassigned | Unassigned | 502_6  | Clustered           | 2 VC_502_6   | 2   | 0.0804 | 0.95171362 | 0.0765 | 0 | 0 | 0 | 1 Ref      |
| MT774487 | Unassigned | Unassigned | Unassigned | 28_1   | Clustered           | 53 VC_28_1   | 53  | 0.7164 | 1          | 0.7164 | 0 | 0 | 0 | 0.9325 Ref |
| MT776806 | Unassigned | Unassigned | Unassigned | 571_0  | Clustered           | 4 VC_571_0   | 4   | 0.1921 | 0.99998591 | 0.1921 | 0 | 0 | 0 | 1 Ref      |



|           |            |            |            |         |                     |              |     |        |            |        |   |   |   |            |
|-----------|------------|------------|------------|---------|---------------------|--------------|-----|--------|------------|--------|---|---|---|------------|
| MT776807  | Unassigned | Unassigned | Unassigned | 1344_0  | Clustered           | 78 VC_1344_0 | 78  | 0.9732 | 1          | 0.9732 | 0 | 0 | 0 | 1 Ref      |
| MT776808  | Unassigned | Unassigned | Unassigned | 919_0   | Clustered           | 39 VC_919_0  | 39  | 0.9069 | 1          | 0.9069 | 0 | 0 | 0 | 1 Ref      |
| MT776809  | Unassigned | Unassigned | Unassigned | 919_0   | Clustered           | 39 VC_919_0  | 39  | 0.9069 | 1          | 0.9069 | 0 | 0 | 0 | 1 Ref      |
| MT776810  | Unassigned | Unassigned | Unassigned | 919_0   | Clustered           | 39 VC_919_0  | 39  | 0.9069 | 1          | 0.9069 | 0 | 0 | 0 | 1 Ref      |
| MT776811  | Unassigned | Unassigned | Unassigned | 1073_0  | Clustered           | 24 VC_1073_0 | 24  | 0.8388 | 1          | 0.8388 | 0 | 0 | 0 | 1 Ref      |
| MT776812  | Unassigned | Unassigned | Unassigned | 325_37  | Clustered           | 3 VC_325_37  | 3   | 0.008  | 0.99634936 | 0.008  | 0 | 0 | 0 | 0.6667 Ref |
| MT776813  | Unassigned | Unassigned | Unassigned | 371_9   | Clustered           | 4 VC_371_9   | 4   | 0.0109 | 0.9999766  | 0.0109 | 0 | 0 | 0 | 0.6667 Ref |
| MT777452  | Unassigned | Unassigned | Unassigned | 818_0   | Clustered           | 20 VC_818_0  | 20  | 0.9601 | 1          | 0.9601 | 0 | 0 | 0 | 1 Ref      |
| MT7778837 | Unassigned | Unassigned | Unassigned | 1052_3  | Clustered           | 5 VC_1052_3  | 5   | 0.185  | 0.98656048 | 0.1825 | 0 | 0 | 0 | 1 Ref      |
| MT7778838 | Unassigned | Unassigned | Unassigned | 724_0   | Clustered           | 3 VC_724_0   | 3   | 0.1586 | 0.99815158 | 0.1583 | 0 | 0 | 0 | 1 Ref      |
| MT7778839 | Unassigned | Unassigned | Unassigned | 1052_3  | Clustered           | 5 VC_1052_3  | 5   | 0.185  | 0.98656048 | 0.1825 | 0 | 0 | 0 | 1 Ref      |
| MT7778840 | Unassigned | Unassigned | Unassigned | 990_0   | Clustered           | 3 VC_990_0   | 3   | 0.6363 | 0.99819562 | 0.6351 | 0 | 0 | 0 | 1 Ref      |
| MT782071  | Unassigned | Unassigned | Unassigned | 286_13  | Clustered           | 10 VC_286_13 | 10  | 0.0698 | 0.99999929 | 0.0698 | 0 | 0 | 0 | 0.9556 Ref |
| MT786458  | Unassigned | Unassigned | Unassigned | 149_15  | Clustered           | 16 VC_149_15 | 16  | 0.0788 | 1          | 0.0788 | 0 | 0 | 0 | 0.8083 Ref |
| MT787017  | Unassigned | Unassigned | Unassigned | 149_3   | Clustered/Singleton | 1 VC_149_3   | 1   | 0      | 1          | 0      | 0 | 0 | 0 | 1 Ref      |
| MT795651  | Unassigned | Unassigned | Unassigned | 614_0   | Clustered           | 5 VC_614_0   | 5   | 0.2395 | 0.99999997 | 0.2395 | 0 | 0 | 0 | 1 Ref      |
| MT799840  | Unassigned | Unassigned | Unassigned | 959_5   | Clustered           | 19 VC_959_5  | 19  | 0.2626 | 1          | 0.2626 | 0 | 0 | 0 | 1 Ref      |
| MT806185  | Unassigned | Unassigned | Unassigned | 1008_0  | Clustered           | 4 VC_1008_0  | 4   | 0.6602 | 0.99993542 | 0.6601 | 0 | 0 | 0 | 1 Ref      |
| MT806186  | Unassigned | Unassigned | Unassigned | 1008_0  | Clustered           | 4 VC_1008_0  | 4   | 0.6602 | 0.99993542 | 0.6601 | 0 | 0 | 0 | 1 Ref      |
| MT808983  | Unassigned | Unassigned | Unassigned | 451_0   | Clustered           | 80 VC_451_0  | 80  | 0.9991 | 1          | 0.9991 | 0 | 0 | 0 | 1 Ref      |
| MT811961  | Unassigned | Unassigned | Unassigned | 346_1   | Clustered           | 2 VC_346_1   | 2   | 0.1238 | 0.95353448 | 0.1181 | 0 | 0 | 0 | 1 Ref      |
| MT813140  | Unassigned | Unassigned | Unassigned | 823_0   | Clustered           | 124 VC_823_0 | 124 | 0.9492 | 1          | 0.9492 | 0 | 0 | 0 | 1 Ref      |
| MT813141  | Unassigned | Unassigned | Unassigned | 823_0   | Clustered           | 124 VC_823_0 | 124 | 0.9492 | 1          | 0.9492 | 0 | 0 | 0 | 1 Ref      |
| MT813142  | Unassigned | Unassigned | Unassigned | 385_0   | Clustered           | 51 VC_385_0  | 51  | 0.8754 | 1          | 0.8754 | 0 | 0 | 0 | 1 Ref      |
| MT813197  | Unassigned | Unassigned | Unassigned | 30_1    | Clustered           | 16 VC_30_1   | 16  | 0.1973 | 1          | 0.1973 | 0 | 0 | 0 | 0.8333 Ref |
| MT818415  | Unassigned | Unassigned | Unassigned | 1352_0  | Clustered           | 31 VC_1352_0 | 31  | 0.849  | 1          | 0.849  | 0 | 0 | 0 | 1 Ref      |
| MT818416  | Unassigned | Unassigned | Unassigned | 558_29  | Clustered/Singleton | 1 VC_558_29  | 1   | 0      | 1          | 0      | 0 | 0 | 0 | 1 Ref      |
| MT818417  | Unassigned | Unassigned | Unassigned | 517_1   | Clustered           | 108 VC_517_1 | 108 | 0.8483 | 1          | 0.8483 | 0 | 0 | 0 | 0.9955 Ref |
| MT818418  | Unassigned | Unassigned | Unassigned | 556_0   | Clustered           | 21 VC_556_0  | 21  | 0.9912 | 1          | 0.9912 | 0 | 0 | 0 | 1 Ref      |
| MT818419  | Unassigned | Unassigned | Unassigned | 372_0   | Clustered           | 24 VC_372_0  | 24  | 0.5539 | 1          | 0.5539 | 0 | 0 | 0 | 1 Ref      |
| MT818420  | Unassigned | Unassigned | Unassigned | 1343_0  | Clustered           | 21 VC_1343_0 | 21  | 0.9843 | 1          | 0.9843 | 0 | 0 | 0 | 1 Ref      |
| MT818421  | Unassigned | Unassigned | Unassigned | 810_0   | Clustered           | 18 VC_810_0  | 18  | 0.9121 | 1          | 0.9121 | 0 | 0 | 0 | 1 Ref      |
| MT818422  | Unassigned | Unassigned | Unassigned | 761_0   | Clustered           | 67 VC_761_0  | 67  | 0.8947 | 1          | 0.8947 | 0 | 0 | 0 | 1 Ref      |
| MT818423  | Unassigned | Unassigned | Unassigned | 558_35  | Clustered/Singleton | 1 VC_558_35  | 1   | 0      | 1          | 0      | 0 | 0 | 0 | 1 Ref      |
| MT818424  | Unassigned | Unassigned | Unassigned | 1175_0  | Clustered           | 22 VC_1175_0 | 22  | 0.4562 | 1          | 0.4562 | 0 | 0 | 0 | 1 Ref      |
| MT818425  | Unassigned | Unassigned | Unassigned | 556_0   | Clustered           | 21 VC_556_0  | 21  | 0.9912 | 1          | 0.9912 | 0 | 0 | 0 | 1 Ref      |
| MT818426  | Unassigned | Unassigned | Unassigned | 1031_0  | Clustered           | 4 VC_1031_0  | 4   | 0.7884 | 0.99997621 | 0.7884 | 0 | 0 | 0 | 1 Ref      |
| MT818427  | Unassigned | Unassigned | Unassigned | 1234_0  | Clustered           | 44 VC_1234_0 | 44  | 1      | 1          | 1      | 0 | 0 | 0 | 1 Ref      |
| MT822284  | Unassigned | Unassigned | Unassigned | 395_0   | Clustered           | 5 VC_395_0   | 5   | 0.1021 | 0.99999998 | 0.1021 | 0 | 0 | 0 | 1 Ref      |
| MT822285  | Unassigned | Unassigned | Unassigned | 395_0   | Clustered           | 5 VC_395_0   | 5   | 0.1021 | 0.99999998 | 0.1021 | 0 | 0 | 0 | 1 Ref      |
| MT822286  | Unassigned | Unassigned | Unassigned | 395_0   | Clustered           | 5 VC_395_0   | 5   | 0.1021 | 0.99999998 | 0.1021 | 0 | 0 | 0 | 1 Ref      |
| MT822287  | Unassigned | Unassigned | Unassigned | 395_0   | Clustered           | 5 VC_395_0   | 5   | 0.1021 | 0.99999998 | 0.1021 | 0 | 0 | 0 | 1 Ref      |
| MT822288  | Unassigned | Unassigned | Unassigned | 393_0   | Clustered           | 7 VC_393_0   | 7   | 0.1775 | 1          | 0.1775 | 0 | 0 | 0 | 1 Ref      |
| MT828551  | Unassigned | Unassigned | Unassigned | 283_34  | Clustered           | 4 VC_283_34  | 4   | 0.0082 | 0.9997481  | 0.0082 | 0 | 0 | 0 | 1 Ref      |
| MT828552  | Unassigned | Unassigned | Unassigned | 283_23  | Clustered/Singleton | 1 VC_283_23  | 1   | 0      | 1          | 0      | 0 | 0 | 0 | 1 Ref      |
| MT828553  | Unassigned | Unassigned | Unassigned | 283_34  | Clustered           | 4 VC_283_34  | 4   | 0.0082 | 0.9997481  | 0.0082 | 0 | 0 | 0 | 1 Ref      |
| MT829326  | Unassigned | Unassigned | Unassigned | 695_0   | Clustered           | 48 VC_695_0  | 48  | 0.8162 | 1          | 0.8162 | 0 | 0 | 0 | 1 Ref      |
| MT830620  | Unassigned | Unassigned | Unassigned | 315_0   | Clustered           | 12 VC_315_0  | 12  | 0.8947 | 1          | 0.8947 | 0 | 0 | 0 | 1 Ref      |
| MT833282  | Unassigned | Unassigned | Unassigned | 329_18  | Clustered           | 7 VC_329_18  | 7   | 0.0328 | 1          | 0.0328 | 0 | 0 | 0 | 0.8095 Ref |
| MT833283  | Unassigned | Unassigned | Unassigned | 191_18  | Clustered           | 2 VC_191_18  | 2   | 0.0057 | 0.91903589 | 0.0053 | 0 | 0 | 0 | 0 Ref      |
| MT833387  | Unassigned | Unassigned | Unassigned | 30_1    | Clustered           | 16 VC_30_1   | 16  | 0.1973 | 1          | 0.1973 | 0 | 0 | 0 | 0.8333 Ref |
| MT843274  | Unassigned | Unassigned | Unassigned | 190_20  | Clustered           | 4 VC_190_20  | 4   | 0.0229 | 0.99997885 | 0.0229 | 0 | 0 | 0 | 1 Ref      |
| MT843275  | Unassigned | Unassigned | Unassigned | 411_0   | Clustered           | 3 VC_411_0   | 3   | 0.1239 | 0.98986341 | 0.1227 | 0 | 0 | 0 | 1 Ref      |
| MT856905  | Unassigned | Unassigned | Unassigned | 92_0    | Clustered           | 22 VC_92_0   | 22  | 0.5639 | 1          | 0.5639 | 0 | 0 | 0 | 1 Ref      |
| MT857001  | Unassigned | Unassigned | Unassigned | 695_0   | Clustered           | 48 VC_695_0  | 48  | 0.8162 | 1          | 0.8162 | 0 | 0 | 0 | 1 Ref      |
| MT857002  | Unassigned | Unassigned | Unassigned | 131_3   | Clustered/Singleton | 1 VC_131_3   | 1   | 0      | 1          | 0      | 0 | 0 | 0 | 1 Ref      |
| MT862763  | Unassigned | Unassigned | Unassigned | 451_0   | Clustered           | 80 VC_451_0  | 80  | 0.9991 | 1          | 0.9991 | 0 | 0 | 0 | 1 Ref      |
| MT863714  | Unassigned | Unassigned | Unassigned | 844_0   | Clustered           | 27 VC_844_0  | 27  | 0.9385 | 1          | 0.9385 | 0 | 0 | 0 | 1 Ref      |
| MT863715  | Unassigned | Unassigned | Unassigned | 844_0   | Clustered           | 27 VC_844_0  | 27  | 0.9385 | 1          | 0.9385 | 0 | 0 | 0 | 1 Ref      |
| MT863716  | Unassigned | Unassigned | Unassigned | 844_0   | Clustered           | 27 VC_844_0  | 27  | 0.9385 | 1          | 0.9385 | 0 | 0 | 0 | 1 Ref      |
| MT863717  | Unassigned | Unassigned | Unassigned | 844_0   | Clustered           | 27 VC_844_0  | 27  | 0.9385 | 1          | 0.9385 | 0 | 0 | 0 | 1 Ref      |
| MT863718  | Unassigned | Unassigned | Unassigned | 844_0   | Clustered           | 27 VC_844_0  | 27  | 0.9385 | 1          | 0.9385 | 0 | 0 | 0 | 1 Ref      |
| MT863719  | Unassigned | Unassigned | Unassigned | 844_0   | Clustered           | 27 VC_844_0  | 27  | 0.9385 | 1          | 0.9385 | 0 | 0 | 0 | 1 Ref      |
| MT863720  | Unassigned | Unassigned | Unassigned | 844_0   | Clustered           | 27 VC_844_0  | 27  | 0.9385 | 1          | 0.9385 | 0 | 0 | 0 | 1 Ref      |
| MT863721  | Unassigned | Unassigned | Unassigned | 844_0   | Clustered           | 27 VC_844_0  | 27  | 0.9385 | 1          | 0.9385 | 0 | 0 | 0 | 1 Ref      |
| MT863722  | Unassigned | Unassigned | Unassigned | 844_0   | Clustered           | 27 VC_844_0  | 27  | 0.9385 | 1          | 0.9385 | 0 | 0 | 0 | 1 Ref      |
| MT863723  | Unassigned | Unassigned | Unassigned | 844_0   | Clustered           | 27 VC_844_0  | 27  | 0.9385 | 1          | 0.9385 | 0 | 0 | 0 | 1 Ref      |
| MT863724  | Unassigned | Unassigned | Unassigned | 844_0   | Clustered           | 27 VC_844_0  | 27  | 0.9385 | 1          | 0.9385 | 0 | 0 | 0 | 1 Ref      |
| MT863725  | Unassigned | Unassigned | Unassigned | 844_0   | Clustered           | 27 VC_844_0  | 27  | 0.9385 | 1          | 0.9385 | 0 | 0 | 0 | 1 Ref      |
| MT863726  | Unassigned | Unassigned | Unassigned | 844_0   | Clustered           | 27 VC_844_0  | 27  | 0.9385 | 1          | 0.9385 | 0 | 0 | 0 | 1 Ref      |
| MT863727  | Unassigned | Unassigned | Unassigned | 844_0   | Clustered           | 27 VC_844_0  | 27  | 0.9385 | 1          | 0.9385 | 0 | 0 | 0 | 1 Ref      |
| MT863728  | Unassigned | Unassigned | Unassigned | 844_0   | Clustered           | 27 VC_844_0  | 27  | 0.9385 | 1          | 0.9385 | 0 | 0 | 0 | 1 Ref      |
| MT863729  | Unassigned | Unassigned | Unassigned | 844_0   | Clustered           | 27 VC_844_0  | 27  | 0.9385 | 1          | 0.9385 | 0 | 0 | 0 | 1 Ref      |
| MT863730  | Unassigned | Unassigned | Unassigned | 844_0   | Clustered           | 27 VC_844_0  | 27  | 0.9385 | 1          | 0.9385 | 0 | 0 | 0 | 1 Ref      |
| MT863731  | Unassigned | Unassigned | Unassigned | 844_0   | Clustered           | 27 VC_844_0  | 27  | 0.9385 | 1          | 0.9385 | 0 | 0 | 0 | 1 Ref      |
| MT880872  | Unassigned | Unassigned | Unassigned | 213_0   | Clustered           | 2 VC_213_0   | 2   | 0.4293 | 0.95300227 | 0.4091 | 0 | 0 | 0 | 1 Ref      |
| MT884006  | Unassigned | Unassigned | Unassigned | 283_184 | Clustered           | 2 VC_283_184 | 2   | 0.0025 | 0.93531224 | 0.0023 | 0 | 0 | 0 | 1 Ref      |
| MT884007  | Unassigned | Unassigned | Unassigned | 283_184 | Clustered           | 2 VC_283_184 | 2   | 0.0025 | 0.93531224 | 0.0023 | 0 | 0 | 0 | 1 Ref      |
| MT884008  | Unassigned | Unassigned | Unassigned | 772_10  | Clustered           | 8 VC_772_10  | 8   | 0.0433 | 0.9088183  | 0.0394 | 0 | 0 | 0 | 0.9286 Ref |
| MT884009  | Unassigned | Unassigned | Unassigned | 772_10  | Clustered           | 8 VC_772_10  | 8   | 0.0433 | 0.9088183  | 0.0394 | 0 | 0 | 0 | 0.9286 Ref |
| MT884010  | Unassigned | Unassigned | Unassigned | 772_10  | Clustered           | 8 VC_772_10  | 8   | 0.0433 | 0.9088183  | 0.0394 | 0 | 0 | 0 | 0.9286 Ref |



|          |            |            |            |        |                     |              |     |        |            |        |   |   |   |        |     |
|----------|------------|------------|------------|--------|---------------------|--------------|-----|--------|------------|--------|---|---|---|--------|-----|
| MT884011 | Unassigned | Unassigned | Unassigned | 772_10 | Clustered           | 8 VC_772_10  | 8   | 0.0433 | 0.9088183  | 0.0394 | 0 | 0 | 0 | 0.9286 | Ref |
| MT884012 | Unassigned | Unassigned | Unassigned | 835_0  | Clustered           | 67 VC_835_0  | 67  | 0.9624 | 1          | 0.9624 | 0 | 0 | 0 | 1      | Ref |
| MT884013 | Unassigned | Unassigned | Unassigned | 835_0  | Clustered           | 67 VC_835_0  | 67  | 0.9624 | 1          | 0.9624 | 0 | 0 | 0 | 1      | Ref |
| MT884014 | Unassigned | Unassigned | Unassigned | 835_0  | Clustered           | 67 VC_835_0  | 67  | 0.9624 | 1          | 0.9624 | 0 | 0 | 0 | 1      | Ref |
| MT884015 | Unassigned | Unassigned | Unassigned | 835_0  | Clustered           | 67 VC_835_0  | 67  | 0.9624 | 1          | 0.9624 | 0 | 0 | 0 | 1      | Ref |
| MT887289 | Unassigned | Unassigned | Unassigned | 329_18 | Clustered           | 7 VC_329_18  | 7   | 0.0328 | 1          | 0.0328 | 0 | 0 | 0 | 0.8095 | Ref |
| MT889364 | Unassigned | Unassigned | Unassigned | 1362_0 | Clustered           | 6 VC_1362_0  | 6   | 1      | 1          | 1      | 0 | 0 | 0 | 1      | Ref |
| MT889365 | Unassigned | Unassigned | Unassigned | 1234_0 | Clustered           | 44 VC_1234_0 | 44  | 1      | 1          | 1      | 0 | 0 | 0 | 1      | Ref |
| MT889366 | Unassigned | Unassigned | Unassigned | 1207_0 | Clustered           | 29 VC_1207_0 | 29  | 0.8225 | 1          | 0.8225 | 0 | 0 | 0 | 1      | Ref |
| MT889367 | Unassigned | Unassigned | Unassigned | 919_0  | Clustered           | 39 VC_919_0  | 39  | 0.9069 | 1          | 0.9069 | 0 | 0 | 0 | 1      | Ref |
| MT889368 | Unassigned | Unassigned | Unassigned | 868_0  | Clustered           | 25 VC_868_0  | 25  | 0.5791 | 1          | 0.5791 | 0 | 0 | 0 | 1      | Ref |
| MT889369 | Unassigned | Unassigned | Unassigned | 371_9  | Clustered           | 4 VC_371_9   | 4   | 0.0109 | 0.9999766  | 0.0109 | 0 | 0 | 0 | 0.6667 | Ref |
| MT889370 | Unassigned | Unassigned | Unassigned | 868_0  | Clustered           | 25 VC_868_0  | 25  | 0.5791 | 1          | 0.5791 | 0 | 0 | 0 | 1      | Ref |
| MT889371 | Unassigned | Unassigned | Unassigned | 1350_0 | Clustered           | 2 VC_1350_0  | 2   | 0.1631 | 0.95304852 | 0.1555 | 0 | 0 | 0 | 1      | Ref |
| MT889372 | Unassigned | Unassigned | Unassigned | 1234_0 | Clustered           | 44 VC_1234_0 | 44  | 1      | 1          | 1      | 0 | 0 | 0 | 1      | Ref |
| MT889373 | Unassigned | Unassigned | Unassigned | 1166_0 | Clustered           | 20 VC_1166_0 | 20  | 0.99   | 1          | 0.99   | 0 | 0 | 0 | 1      | Ref |
| MT889374 | Unassigned | Unassigned | Unassigned | 520_1  | Clustered/Singleton | 1 VC_520_1   | 1   | 0      | 1          | 0      | 0 | 0 | 0 | 1      | Ref |
| MT889375 | Unassigned | Unassigned | Unassigned | 1207_0 | Clustered           | 29 VC_1207_0 | 29  | 0.8225 | 1          | 0.8225 | 0 | 0 | 0 | 1      | Ref |
| MT889376 | Unassigned | Unassigned | Unassigned | 1207_0 | Clustered           | 29 VC_1207_0 | 29  | 0.8225 | 1          | 0.8225 | 0 | 0 | 0 | 1      | Ref |
| MT889378 | Unassigned | Unassigned | Unassigned | 919_0  | Clustered           | 39 VC_919_0  | 39  | 0.9069 | 1          | 0.9069 | 0 | 0 | 0 | 1      | Ref |
| MT889379 | Unassigned | Unassigned | Unassigned | 868_0  | Clustered           | 25 VC_868_0  | 25  | 0.5791 | 1          | 0.5791 | 0 | 0 | 0 | 1      | Ref |
| MT889381 | Unassigned | Unassigned | Unassigned | 372_1  | Clustered           | 9 VC_372_1   | 9   | 0.194  | 1          | 0.194  | 0 | 0 | 0 | 1      | Ref |
| MT889382 | Unassigned | Unassigned | Unassigned | 517_1  | Clustered           | 108 VC_517_1 | 108 | 0.8483 | 1          | 0.8483 | 0 | 0 | 0 | 0.9955 | Ref |
| MT889383 | Unassigned | Unassigned | Unassigned | 889_0  | Clustered           | 16 VC_889_0  | 16  | 0.2969 | 1          | 0.2969 | 0 | 0 | 0 | 1      | Ref |
| MT889384 | Unassigned | Unassigned | Unassigned | 325_14 | Clustered           | 3 VC_325_14  | 3   | 0.0094 | 0.99859159 | 0.0094 | 0 | 0 | 0 | 1      | Ref |
| MT889385 | Unassigned | Unassigned | Unassigned | 565_0  | Clustered           | 20 VC_565_0  | 20  | 0.8398 | 1          | 0.8398 | 0 | 0 | 0 | 1      | Ref |
| MT889386 | Unassigned | Unassigned | Unassigned | 517_1  | Clustered           | 108 VC_517_1 | 108 | 0.8483 | 1          | 0.8483 | 0 | 0 | 0 | 0.9955 | Ref |
| MT889388 | Unassigned | Unassigned | Unassigned | 1073_0 | Clustered           | 24 VC_1073_0 | 24  | 0.8388 | 1          | 0.8388 | 0 | 0 | 0 | 1      | Ref |
| MT889389 | Unassigned | Unassigned | Unassigned | 1234_0 | Clustered           | 44 VC_1234_0 | 44  | 1      | 1          | 1      | 0 | 0 | 0 | 1      | Ref |
| MT889390 | Unassigned | Unassigned | Unassigned | 517_1  | Clustered           | 108 VC_517_1 | 108 | 0.8483 | 1          | 0.8483 | 0 | 0 | 0 | 0.9955 | Ref |
| MT889391 | Unassigned | Unassigned | Unassigned | 889_0  | Clustered           | 16 VC_889_0  | 16  | 0.2969 | 1          | 0.2969 | 0 | 0 | 0 | 1      | Ref |
| MT889392 | Unassigned | Unassigned | Unassigned | 1234_0 | Clustered           | 44 VC_1234_0 | 44  | 1      | 1          | 1      | 0 | 0 | 0 | 1      | Ref |
| MT889393 | Unassigned | Unassigned | Unassigned | 767_0  | Clustered           | 34 VC_767_0  | 34  | 0.9173 | 1          | 0.9173 | 0 | 0 | 0 | 1      | Ref |
| MT889394 | Unassigned | Unassigned | Unassigned | 1170_0 | Clustered           | 3 VC_1170_0  | 3   | 0.3275 | 0.99834213 | 0.327  | 0 | 0 | 0 | 1      | Ref |
| MT889395 | Unassigned | Unassigned | Unassigned | 558_11 | Clustered           | 2 VC_558_11  | 2   | 0.0032 | 0.78528587 | 0.0025 | 0 | 0 | 0 | 1      | Ref |
| MT889396 | Unassigned | Unassigned | Unassigned | 520_92 | Clustered           | 5 VC_520_92  | 5   | 0.0663 | 0.99999997 | 0.0663 | 0 | 0 | 0 | 1      | Ref |
| MT889397 | Unassigned | Unassigned | Unassigned | 520_92 | Clustered           | 5 VC_520_92  | 5   | 0.0663 | 0.99999997 | 0.0663 | 0 | 0 | 0 | 1      | Ref |
| MT889398 | Unassigned | Unassigned | Unassigned | 525_0  | Clustered           | 25 VC_525_0  | 25  | 0.4597 | 1          | 0.4597 | 0 | 0 | 0 | 1      | Ref |
| MT894004 | Unassigned | Unassigned | Unassigned | 123_0  | Clustered           | 23 VC_123_0  | 23  | 0.817  | 1          | 0.817  | 0 | 0 | 0 | 1      | Ref |
| MT894005 | Unassigned | Unassigned | Unassigned | 938_0  | Clustered           | 99 VC_938_0  | 99  | 0.9119 | 1          | 0.9119 | 0 | 0 | 0 | 0.9928 | Ref |
| MT897901 | Unassigned | Unassigned | Unassigned | 371_18 | Clustered           | 10 VC_371_18 | 10  | 0.0302 | 1          | 0.0302 | 0 | 0 | 0 | 0.8    | Ref |
| MT897902 | Unassigned | Unassigned | Unassigned | 371_3  | Clustered           | 22 VC_371_3  | 22  | 0.0787 | 1          | 0.0787 | 0 | 0 | 0 | 0.9048 | Ref |
| MT897903 | Unassigned | Unassigned | Unassigned | 371_0  | Clustered           | 2 VC_371_0   | 2   | 0.0032 | 0.94731972 | 0.003  | 0 | 0 | 0 | 1      | Ref |
| MT897904 | Unassigned | Unassigned | Unassigned | 520_50 | Clustered/Singleton | 1 VC_520_50  | 1   | 0      | 1          | 0      | 0 | 0 | 0 | 1      | Ref |
| MT897905 | Unassigned | Unassigned | Unassigned | 1071_2 | Clustered           | 5 VC_1071_2  | 5   | 0.0534 | 0.99997362 | 0.0534 | 0 | 0 | 0 | 0.9    | Ref |
| MT897906 | Unassigned | Unassigned | Unassigned | 1207_0 | Clustered           | 29 VC_1207_0 | 29  | 0.8225 | 1          | 0.8225 | 0 | 0 | 0 | 1      | Ref |
| MT897907 | Unassigned | Unassigned | Unassigned | 514_0  | Clustered           | 75 VC_514_0  | 75  | 0.9402 | 1          | 0.9402 | 0 | 0 | 0 | 1      | Ref |
| MT897908 | Unassigned | Unassigned | Unassigned | 859_0  | Clustered           | 9 VC_859_0   | 9   | 0.9426 | 1          | 0.9426 | 0 | 0 | 0 | 1      | Ref |
| MT897909 | Unassigned | Unassigned | Unassigned | 371_16 | Clustered           | 42 VC_371_16 | 42  | 0.1341 | 1          | 0.1341 | 0 | 0 | 0 | 0.7282 | Ref |
| MT897910 | Unassigned | Unassigned | Unassigned | 372_0  | Clustered           | 24 VC_372_0  | 24  | 0.5539 | 1          | 0.5539 | 0 | 0 | 0 | 1      | Ref |
| MT899443 | Unassigned | Unassigned | Unassigned | 730_0  | Clustered           | 9 VC_730_0   | 9   | 1      | 1          | 1      | 0 | 0 | 0 | 1      | Ref |
| MT899444 | Unassigned | Unassigned | Unassigned | 730_0  | Clustered           | 9 VC_730_0   | 9   | 1      | 1          | 1      | 0 | 0 | 0 | 1      | Ref |
| MT899504 | Unassigned | Unassigned | Unassigned | 8_0    | Clustered           | 58 VC_8_0    | 58  | 0.8306 | 1          | 0.8306 | 0 | 0 | 0 | 0.9946 | Ref |
| MT900487 | Unassigned | Unassigned | Unassigned | 333_0  | Clustered           | 25 VC_333_0  | 25  | 0.4681 | 1          | 0.4681 | 0 | 0 | 0 | 1      | Ref |
| MT900488 | Unassigned | Unassigned | Unassigned | 412_0  | Clustered           | 39 VC_412_0  | 39  | 0.845  | 1          | 0.845  | 0 | 0 | 0 | 1      | Ref |
| MT902335 | Unassigned | Unassigned | Unassigned | 422_0  | Clustered           | 5 VC_422_0   | 5   | 0.2592 | 0.99999997 | 0.2592 | 0 | 0 | 0 | 1      | Ref |
| MT909815 | Unassigned | Unassigned | Unassigned | 92_0   | Clustered           | 22 VC_92_0   | 22  | 0.5639 | 1          | 0.5639 | 0 | 0 | 0 | 1      | Ref |
| MT920315 | Unassigned | Unassigned | Unassigned | 490_6  | Clustered/Singleton | 1 VC_490_6   | 1   | 0      | 1          | 0      | 0 | 0 | 0 | 1      | Ref |
| MT926124 | Unassigned | Unassigned | Unassigned | 96_0   | Clustered           | 30 VC_96_0   | 30  | 0.718  | 1          | 0.718  | 0 | 0 | 0 | 1      | Ref |
| MT932211 | Unassigned | Unassigned | Unassigned | 848_0  | Clustered           | 28 VC_848_0  | 28  | 0.7927 | 1          | 0.7927 | 0 | 0 | 0 | 1      | Ref |
| MT932212 | Unassigned | Unassigned | Unassigned | 28_1   | Clustered           | 53 VC_28_1   | 53  | 0.7164 | 1          | 0.7164 | 0 | 0 | 0 | 0.9325 | Ref |
| MT932213 | Unassigned | Unassigned | Unassigned | 283_93 | Clustered/Singleton | 1 VC_283_93  | 1   | 0      | 1          | 0      | 0 | 0 | 0 | 1      | Ref |
| MT932329 | Unassigned | Unassigned | Unassigned | 843_0  | Clustered           | 5 VC_843_0   | 5   | 0.2843 | 0.99999994 | 0.2843 | 0 | 0 | 0 | 1      | Ref |
| MT933737 | Unassigned | Unassigned | Unassigned | 79_0   | Clustered           | 64 VC_79_0   | 64  | 0.4185 | 1          | 0.4185 | 0 | 0 | 0 | 0.7649 | Ref |
| MT936332 | Unassigned | Unassigned | Unassigned | 859_0  | Clustered           | 9 VC_859_0   | 9   | 0.9426 | 1          | 0.9426 | 0 | 0 | 0 | 1      | Ref |
| MT939241 | Unassigned | Unassigned | Unassigned | 691_0  | Clustered           | 2 VC_691_0   | 2   | 0.1052 | 0.95343038 | 0.1003 | 0 | 0 | 0 | 1      | Ref |
| MT939252 | Unassigned | Unassigned | Unassigned | 111_0  | Clustered           | 91 VC_111_0  | 91  | 0.9587 | 1          | 0.9587 | 0 | 0 | 0 | 1      | Ref |
| MT939253 | Unassigned | Unassigned | Unassigned | 582_3  | Clustered           | 12 VC_582_3  | 12  | 0.2357 | 1          | 0.2357 | 0 | 0 | 0 | 0.8636 | Ref |
| MT939486 | Unassigned | Unassigned | Unassigned | 164_7  | Clustered           | 7 VC_164_7   | 7   | 0.0956 | 0.99998    | 0.0956 | 0 | 0 | 0 | 1      | Ref |
| MT939487 | Unassigned | Unassigned | Unassigned | 164_7  | Clustered           | 7 VC_164_7   | 7   | 0.0956 | 0.99998    | 0.0956 | 0 | 0 | 0 | 1      | Ref |
| MT939488 | Unassigned | Unassigned | Unassigned | 164_7  | Clustered           | 7 VC_164_7   | 7   | 0.0956 | 0.99998    | 0.0956 | 0 | 0 | 0 | 1      | Ref |
| MT941682 | Unassigned | Unassigned | Unassigned | 1027_0 | Clustered           | 20 VC_1027_0 | 20  | 0.7114 | 1          | 0.7114 | 0 | 0 | 0 | 1      | Ref |
| MT944117 | Unassigned | Unassigned | Unassigned | 847_1  | Clustered           | 26 VC_847_1  | 26  | 0.6323 | 1          | 0.6323 | 0 | 0 | 0 | 0.9815 | Ref |
| MT947439 | Unassigned | Unassigned | Unassigned | 303_0  | Clustered           | 155 VC_303_0 | 155 | 0.9979 | 1          | 0.9979 | 0 | 0 | 0 | 1      | Ref |
| MT949699 | Unassigned | Unassigned | Unassigned | 492_2  | Clustered           | 8 VC_492_2   | 8   | 0.1221 | 0.98786574 | 0.1206 | 0 | 0 | 0 | 1      | Ref |
| MT951623 | Unassigned | Unassigned | Unassigned | 835_0  | Clustered           | 67 VC_835_0  | 67  | 0.9624 | 1          | 0.9624 | 0 | 0 | 0 | 1      | Ref |
| MT952005 | Unassigned | Unassigned | Unassigned | 597_0  | Clustered           | 6 VC_597_0   | 6   | 0.1801 | 1          | 0.1801 | 0 | 0 | 0 | 1      | Ref |
| MT952844 | Unassigned | Unassigned | Unassigned | 525_0  | Clustered           | 25 VC_525_0  | 25  | 0.4597 | 1          | 0.4597 | 0 | 0 | 0 | 1      | Ref |
| MT952845 | Unassigned | Unassigned | Unassigned | 1206_0 | Clustered           | 8 VC_1206_0  | 8   | 0.1913 | 1          | 0.1913 | 0 | 0 | 0 | 1      | Ref |
| MT952846 | Unassigned | Unassigned | Unassigned | 1240_0 | Clustered           | 82 VC_1240_0 | 82  | 0.7945 | 1          | 0.7945 | 0 | 0 | 0 | 1      | Ref |
| MT952847 | Unassigned | Unassigned | Unassigned | 325_38 | Clustered           | 6 VC_325_38  | 6   | 0.0267 | 1          | 0.0267 | 0 | 0 | 0 | 0.8    | Ref |



|          |            |            |            |         |                     |              |     |        |            |        |   |   |   |            |
|----------|------------|------------|------------|---------|---------------------|--------------|-----|--------|------------|--------|---|---|---|------------|
| MT952848 | Unassigned | Unassigned | Unassigned | 1440_0  | Clustered           | 4 VC_1440_0  | 4   | 1      | 1          | 1      | 0 | 0 | 0 | 1 Ref      |
| MT952849 | Unassigned | Unassigned | Unassigned | 371_12  | Clustered           | 4 VC_371_12  | 4   | 0.0126 | 0.99998489 | 0.0126 | 0 | 0 | 0 | 0.8333 Ref |
| MT952850 | Unassigned | Unassigned | Unassigned | 1344_0  | Clustered           | 78 VC_1344_0 | 78  | 0.9732 | 1          | 0.9732 | 0 | 0 | 0 | 1 Ref      |
| MT952851 | Unassigned | Unassigned | Unassigned | 509_0   | Clustered           | 37 VC_509_0  | 37  | 0.9689 | 1          | 0.9689 | 0 | 0 | 0 | 1 Ref      |
| MT952852 | Unassigned | Unassigned | Unassigned | 1072_4  | Clustered           | 4 VC_1072_4  | 4   | 0.0736 | 0.99956559 | 0.0736 | 0 | 0 | 0 | 1 Ref      |
| MT952853 | Unassigned | Unassigned | Unassigned | 1166_0  | Clustered           | 20 VC_1166_0 | 20  | 0.99   | 1          | 0.99   | 0 | 0 | 0 | 1 Ref      |
| MT952854 | Unassigned | Unassigned | Unassigned | 551_6   | Clustered           | 22 VC_551_6  | 22  | 0.1214 | 1          | 0.1214 | 0 | 0 | 0 | 0.8095 Ref |
| MT956952 | Unassigned | Unassigned | Unassigned | 272_0   | Clustered           | 11 VC_272_0  | 11  | 0.4915 | 1          | 0.4915 | 0 | 0 | 0 | 0.8727 Ref |
| MT966872 | Unassigned | Unassigned | Unassigned | 823_0   | Clustered           | 124 VC_823_0 | 124 | 0.9492 | 1          | 0.9492 | 0 | 0 | 0 | 1 Ref      |
| MT966873 | Unassigned | Unassigned | Unassigned | 823_0   | Clustered           | 124 VC_823_0 | 124 | 0.9492 | 1          | 0.9492 | 0 | 0 | 0 | 1 Ref      |
| MT968995 | Unassigned | Unassigned | Unassigned | 283_173 | Clustered/Singleton | 1 VC_283_173 | 1   | 0      | 1          | 0      | 0 | 0 | 0 | 1 Ref      |
| MT974436 | Unassigned | Unassigned | Unassigned | 133_7   | Clustered/Singleton | 1 VC_133_7   | 1   | 0      | 1          | 0      | 0 | 0 | 0 | 1 Ref      |
| MT975991 | Unassigned | Unassigned | Unassigned | 1441_0  | Clustered           | 2 VC_1441_0  | 2   | 1      | 1          | 1      | 0 | 0 | 0 | 1 Ref      |
| MT980836 | Unassigned | Unassigned | Unassigned | 337_0   | Clustered           | 6 VC_337_0   | 6   | 0.6058 | 1          | 0.6058 | 0 | 0 | 0 | 1 Ref      |
| MT980837 | Unassigned | Unassigned | Unassigned | 337_0   | Clustered           | 6 VC_337_0   | 6   | 0.6058 | 1          | 0.6058 | 0 | 0 | 0 | 1 Ref      |
| MT980838 | Unassigned | Unassigned | Unassigned | 337_0   | Clustered           | 6 VC_337_0   | 6   | 0.6058 | 1          | 0.6058 | 0 | 0 | 0 | 1 Ref      |
| MT980839 | Unassigned | Unassigned | Unassigned | 337_0   | Clustered           | 6 VC_337_0   | 6   | 0.6058 | 1          | 0.6058 | 0 | 0 | 0 | 1 Ref      |
| MT980840 | Unassigned | Unassigned | Unassigned | 337_0   | Clustered           | 6 VC_337_0   | 6   | 0.6058 | 1          | 0.6058 | 0 | 0 | 0 | 1 Ref      |
| MT980841 | Unassigned | Unassigned | Unassigned | 337_0   | Clustered           | 6 VC_337_0   | 6   | 0.6058 | 1          | 0.6058 | 0 | 0 | 0 | 1 Ref      |
| MT984581 | Unassigned | Unassigned | Unassigned | 283_91  | Clustered           | 11 VC_283_91 | 11  | 0.0285 | 1          | 0.0285 | 0 | 0 | 0 | 1 Ref      |
| MT986025 | Unassigned | Unassigned | Unassigned | 767_0   | Clustered           | 34 VC_767_0  | 34  | 0.9173 | 1          | 0.9173 | 0 | 0 | 0 | 1 Ref      |
| MT986026 | Unassigned | Unassigned | Unassigned | 1240_0  | Clustered           | 82 VC_1240_0 | 82  | 0.7945 | 1          | 0.7945 | 0 | 0 | 0 | 1 Ref      |
| MT986027 | Unassigned | Unassigned | Unassigned | 1240_0  | Clustered           | 82 VC_1240_0 | 82  | 0.7945 | 1          | 0.7945 | 0 | 0 | 0 | 1 Ref      |
| MT986028 | Unassigned | Unassigned | Unassigned | 857_0   | Clustered           | 11 VC_857_0  | 11  | 0.9712 | 1          | 0.9712 | 0 | 0 | 0 | 1 Ref      |
| MT986029 | Unassigned | Unassigned | Unassigned | 868_0   | Clustered           | 25 VC_868_0  | 25  | 0.5791 | 1          | 0.5791 | 0 | 0 | 0 | 1 Ref      |
| MT992243 | Unassigned | Unassigned | Unassigned | 608_0   | Clustered           | 5 VC_608_0   | 5   | 0.4331 | 0.99999996 | 0.4331 | 0 | 0 | 0 | 1 Ref      |
| MT995926 | Unassigned | Unassigned | Unassigned | 344_0   | Clustered           | 21 VC_344_0  | 21  | 0.5436 | 1          | 0.5436 | 0 | 0 | 0 | 1 Ref      |
| MT995927 | Unassigned | Unassigned | Unassigned | 344_0   | Clustered           | 21 VC_344_0  | 21  | 0.5436 | 1          | 0.5436 | 0 | 0 | 0 | 1 Ref      |
| MT995928 | Unassigned | Unassigned | Unassigned | 344_0   | Clustered           | 21 VC_344_0  | 21  | 0.5436 | 1          | 0.5436 | 0 | 0 | 0 | 1 Ref      |
| MW001214 | Unassigned | Unassigned | Unassigned | 87_0    | Clustered           | 8 VC_87_0    | 8   | 0.5545 | 1          | 0.5545 | 0 | 0 | 0 | 1 Ref      |
| MW001769 | Unassigned | Unassigned | Unassigned | 389_0   | Clustered           | 3 VC_389_0   | 3   | 0.0515 | 0.99861557 | 0.0514 | 0 | 0 | 0 | 1 Ref      |
| MW004544 | Unassigned | Unassigned | Unassigned | 92_0    | Clustered           | 22 VC_92_0   | 22  | 0.5639 | 1          | 0.5639 | 0 | 0 | 0 | 1 Ref      |
| MW004545 | Unassigned | Unassigned | Unassigned | 92_0    | Clustered           | 22 VC_92_0   | 22  | 0.5639 | 1          | 0.5639 | 0 | 0 | 0 | 1 Ref      |
| MW006474 | Unassigned | Unassigned | Unassigned | 329_1   | Clustered           | 17 VC_329_1  | 17  | 0.0867 | 1          | 0.0867 | 0 | 0 | 0 | 0.8235 Ref |
| MW006475 | Unassigned | Unassigned | Unassigned | 329_1   | Clustered           | 17 VC_329_1  | 17  | 0.0867 | 1          | 0.0867 | 0 | 0 | 0 | 0.8235 Ref |
| MW006476 | Unassigned | Unassigned | Unassigned | 133_11  | Clustered           | 2 VC_133_11  | 2   | 0.006  | 0.93904954 | 0.0056 | 0 | 0 | 0 | 1 Ref      |
| MW006477 | Unassigned | Unassigned | Unassigned | 582_5   | Clustered           | 4 VC_582_5   | 4   | 0.0528 | 0.99935625 | 0.0527 | 0 | 0 | 0 | 0.8333 Ref |
| MW006478 | Unassigned | Unassigned | Unassigned | 191_0   | Clustered           | 2 VC_191_0   | 2   | 0.0067 | 0.95760971 | 0.0064 | 0 | 0 | 0 | 1 Ref      |
| MW006479 | Unassigned | Unassigned | Unassigned | 190_40  | Clustered           | 2 VC_190_40  | 2   | 0.0083 | 0.95556395 | 0.0079 | 0 | 0 | 0 | 1 Ref      |
| MW006480 | Unassigned | Unassigned | Unassigned | 133_11  | Clustered           | 2 VC_133_11  | 2   | 0.006  | 0.93904954 | 0.0056 | 0 | 0 | 0 | 1 Ref      |
| MW006481 | Unassigned | Unassigned | Unassigned | 191_0   | Clustered           | 2 VC_191_0   | 2   | 0.0067 | 0.95760971 | 0.0064 | 0 | 0 | 0 | 1 Ref      |
| MW006482 | Unassigned | Unassigned | Unassigned | 329_1   | Clustered           | 17 VC_329_1  | 17  | 0.0867 | 1          | 0.0867 | 0 | 0 | 0 | 0.8235 Ref |
| MW012634 | Unassigned | Unassigned | Unassigned | 818_0   | Clustered           | 20 VC_818_0  | 20  | 0.9601 | 1          | 0.9601 | 0 | 0 | 0 | 1 Ref      |
| MW013502 | Unassigned | Unassigned | Unassigned | 28_1    | Clustered           | 53 VC_28_1   | 53  | 0.7164 | 1          | 0.7164 | 0 | 0 | 0 | 0.9325 Ref |
| MW013503 | Unassigned | Unassigned | Unassigned | 28_1    | Clustered           | 53 VC_28_1   | 53  | 0.7164 | 1          | 0.7164 | 0 | 0 | 0 | 0.9325 Ref |
| MW015080 | Unassigned | Unassigned | Unassigned | 340_0   | Clustered           | 31 VC_340_0  | 31  | 0.9549 | 1          | 0.9549 | 0 | 0 | 0 | 1 Ref      |
| MW015081 | Unassigned | Unassigned | Unassigned | 432_12  | Clustered/Singleton | 1 VC_432_12  | 1   | 0      | 1          | 0      | 0 | 0 | 0 | 1 Ref      |
| MW021748 | Unassigned | Unassigned | Unassigned | 584_0   | Clustered           | 28 VC_584_0  | 28  | 0.7704 | 1          | 0.7704 | 0 | 0 | 0 | 1 Ref      |
| MW021749 | Unassigned | Unassigned | Unassigned | 669_1   | Clustered           | 10 VC_669_1  | 10  | 0.1268 | 1          | 0.1268 | 0 | 0 | 0 | 0.9778 Ref |
| MW021750 | Unassigned | Unassigned | Unassigned | 584_0   | Clustered           | 28 VC_584_0  | 28  | 0.7704 | 1          | 0.7704 | 0 | 0 | 0 | 1 Ref      |
| MW021751 | Unassigned | Unassigned | Unassigned | 669_0   | Clustered           | 21 VC_669_0  | 21  | 0.3623 | 1          | 0.3623 | 0 | 0 | 0 | 1 Ref      |
| MW021752 | Unassigned | Unassigned | Unassigned | 491_0   | Clustered           | 36 VC_491_0  | 36  | 0.5336 | 1          | 0.5336 | 0 | 0 | 0 | 0.9714 Ref |
| MW021753 | Unassigned | Unassigned | Unassigned | 133_22  | Clustered           | 13 VC_133_22 | 13  | 0.0804 | 1          | 0.0804 | 0 | 0 | 0 | 0.8205 Ref |
| MW021754 | Unassigned | Unassigned | Unassigned | 133_44  | Clustered/Singleton | 1 VC_133_44  | 1   | 0      | 1          | 0      | 0 | 0 | 0 | 1 Ref      |
| MW021755 | Unassigned | Unassigned | Unassigned | 1346_0  | Clustered           | 10 VC_1346_0 | 10  | 0.7784 | 1          | 0.7784 | 0 | 0 | 0 | 1 Ref      |
| MW021756 | Unassigned | Unassigned | Unassigned | 669_0   | Clustered           | 21 VC_669_0  | 21  | 0.3623 | 1          | 0.3623 | 0 | 0 | 0 | 1 Ref      |
| MW021757 | Unassigned | Unassigned | Unassigned | 133_22  | Clustered           | 13 VC_133_22 | 13  | 0.0804 | 1          | 0.0804 | 0 | 0 | 0 | 0.8205 Ref |
| MW021758 | Unassigned | Unassigned | Unassigned | 488_1   | Clustered           | 8 VC_488_1   | 8   | 0.2927 | 1          | 0.2927 | 0 | 0 | 0 | 1 Ref      |
| MW021760 | Unassigned | Unassigned | Unassigned | 133_46  | Clustered/Singleton | 1 VC_133_46  | 1   | 0      | 1          | 0      | 0 | 0 | 0 | 1 Ref      |
| MW021762 | Unassigned | Unassigned | Unassigned | 937_0   | Clustered           | 40 VC_937_0  | 40  | 0.6809 | 1          | 0.6809 | 0 | 0 | 0 | 0.9359 Ref |
| MW021763 | Unassigned | Unassigned | Unassigned | 1346_0  | Clustered           | 10 VC_1346_0 | 10  | 0.7784 | 1          | 0.7784 | 0 | 0 | 0 | 1 Ref      |
| MW021764 | Unassigned | Unassigned | Unassigned | 937_0   | Clustered           | 40 VC_937_0  | 40  | 0.6809 | 1          | 0.6809 | 0 | 0 | 0 | 0.9359 Ref |
| MW021765 | Unassigned | Unassigned | Unassigned | 937_0   | Clustered           | 40 VC_937_0  | 40  | 0.6809 | 1          | 0.6809 | 0 | 0 | 0 | 0.9359 Ref |
| MW021766 | Unassigned | Unassigned | Unassigned | 1346_0  | Clustered           | 10 VC_1346_0 | 10  | 0.7784 | 1          | 0.7784 | 0 | 0 | 0 | 1 Ref      |
| MW023914 | Unassigned | Unassigned | Unassigned | 481_0   | Clustered           | 8 VC_481_0   | 8   | 0.1348 | 1          | 0.1348 | 0 | 0 | 0 | 1 Ref      |
| MW032452 | Unassigned | Unassigned | Unassigned | 585_0   | Clustered           | 4 VC_585_0   | 4   | 0.0533 | 0.99998755 | 0.0533 | 0 | 0 | 0 | 1 Ref      |
| MW032477 | Unassigned | Unassigned | Unassigned | 202_0   | Clustered           | 102 VC_202_0 | 102 | 0.4049 | 1          | 0.4049 | 0 | 0 | 0 | 0.7876 Ref |
| MW041632 | Unassigned | Unassigned | Unassigned | 202_0   | Clustered           | 102 VC_202_0 | 102 | 0.4049 | 1          | 0.4049 | 0 | 0 | 0 | 0.7876 Ref |
| MW041633 | Unassigned | Unassigned | Unassigned | 202_0   | Clustered           | 102 VC_202_0 | 102 | 0.4049 | 1          | 0.4049 | 0 | 0 | 0 | 0.7876 Ref |
| MW041634 | Unassigned | Unassigned | Unassigned | 202_0   | Clustered           | 102 VC_202_0 | 102 | 0.4049 | 1          | 0.4049 | 0 | 0 | 0 | 0.7876 Ref |
| MW041635 | Unassigned | Unassigned | Unassigned | 202_0   | Clustered           | 102 VC_202_0 | 102 | 0.4049 | 1          | 0.4049 | 0 | 0 | 0 | 0.7876 Ref |
| MW041636 | Unassigned | Unassigned | Unassigned | 202_0   | Clustered           | 102 VC_202_0 | 102 | 0.4049 | 1          | 0.4049 | 0 | 0 | 0 | 0.7876 Ref |
| MW041637 | Unassigned | Unassigned | Unassigned | 202_0   | Clustered           | 102 VC_202_0 | 102 | 0.4049 | 1          | 0.4049 | 0 | 0 | 0 | 0.7876 Ref |
| MW041638 | Unassigned | Unassigned | Unassigned | 202_0   | Clustered           | 102 VC_202_0 | 102 | 0.4049 | 1          | 0.4049 | 0 | 0 | 0 | 0.7876 Ref |
| MW041639 | Unassigned | Unassigned | Unassigned | 202_0   | Clustered           | 102 VC_202_0 | 102 | 0.4049 | 1          | 0.4049 | 0 | 0 | 0 | 0.7876 Ref |
| MW041640 | Unassigned | Unassigned | Unassigned | 202_0   | Clustered           | 102 VC_202_0 | 102 | 0.4049 | 1          | 0.4049 | 0 | 0 | 0 | 0.7876 Ref |
| MW042787 | Unassigned | Unassigned | Unassigned | 823_0   | Clustered           | 124 VC_823_0 | 124 | 0.9492 | 1          | 0.9492 | 0 | 0 | 0 | 1 Ref      |
| MW042788 | Unassigned | Unassigned | Unassigned | 823_0   | Clustered           | 124 VC_823_0 | 124 | 0.9492 | 1          | 0.9492 | 0 | 0 | 0 | 1 Ref      |
| MW042789 | Unassigned | Unassigned | Unassigned | 823_0   | Clustered           | 124 VC_823_0 | 124 | 0.9492 | 1          | 0.9492 | 0 | 0 | 0 | 1 Ref      |
| MW042790 | Unassigned | Unassigned | Unassigned | 823_0   | Clustered           | 124 VC_823_0 | 124 | 0.9492 | 1          | 0.9492 | 0 | 0 | 0 | 1 Ref      |
| MW042791 | Unassigned | Unassigned | Unassigned | 823_0   | Clustered           | 124 VC_823_0 | 124 | 0.9492 | 1          | 0.9492 | 0 | 0 | 0 | 1 Ref      |



|          |            |            |            |        |                     |              |     |        |            |        |   |   |   |            |
|----------|------------|------------|------------|--------|---------------------|--------------|-----|--------|------------|--------|---|---|---|------------|
| MW042792 | Unassigned | Unassigned | Unassigned | 823_0  | Clustered           | 124 VC_823_0 | 124 | 0.9492 | 1          | 0.9492 | 0 | 0 | 0 | 1 Ref      |
| MW042793 | Unassigned | Unassigned | Unassigned | 823_0  | Clustered           | 124 VC_823_0 | 124 | 0.9492 | 1          | 0.9492 | 0 | 0 | 0 | 1 Ref      |
| MW042794 | Unassigned | Unassigned | Unassigned | 823_0  | Clustered           | 124 VC_823_0 | 124 | 0.9492 | 1          | 0.9492 | 0 | 0 | 0 | 1 Ref      |
| MW042795 | Unassigned | Unassigned | Unassigned | 823_0  | Clustered           | 124 VC_823_0 | 124 | 0.9492 | 1          | 0.9492 | 0 | 0 | 0 | 1 Ref      |
| MW042796 | Unassigned | Unassigned | Unassigned | 823_0  | Clustered           | 124 VC_823_0 | 124 | 0.9492 | 1          | 0.9492 | 0 | 0 | 0 | 1 Ref      |
| MW042797 | Unassigned | Unassigned | Unassigned | 823_0  | Clustered           | 124 VC_823_0 | 124 | 0.9492 | 1          | 0.9492 | 0 | 0 | 0 | 1 Ref      |
| MW042798 | Unassigned | Unassigned | Unassigned | 823_0  | Clustered           | 124 VC_823_0 | 124 | 0.9492 | 1          | 0.9492 | 0 | 0 | 0 | 1 Ref      |
| MW042799 | Unassigned | Unassigned | Unassigned | 823_0  | Clustered           | 124 VC_823_0 | 124 | 0.9492 | 1          | 0.9492 | 0 | 0 | 0 | 1 Ref      |
| MW042800 | Unassigned | Unassigned | Unassigned | 823_0  | Clustered           | 124 VC_823_0 | 124 | 0.9492 | 1          | 0.9492 | 0 | 0 | 0 | 1 Ref      |
| MW042801 | Unassigned | Unassigned | Unassigned | 823_0  | Clustered           | 124 VC_823_0 | 124 | 0.9492 | 1          | 0.9492 | 0 | 0 | 0 | 1 Ref      |
| MW042802 | Unassigned | Unassigned | Unassigned | 937_0  | Clustered           | 40 VC_937_0  | 40  | 0.6809 | 1          | 0.6809 | 0 | 0 | 0 | 0.9359 Ref |
| MW042803 | Unassigned | Unassigned | Unassigned | 823_0  | Clustered           | 124 VC_823_0 | 124 | 0.9492 | 1          | 0.9492 | 0 | 0 | 0 | 1 Ref      |
| MW042804 | Unassigned | Unassigned | Unassigned | 823_0  | Clustered           | 124 VC_823_0 | 124 | 0.9492 | 1          | 0.9492 | 0 | 0 | 0 | 1 Ref      |
| MW042805 | Unassigned | Unassigned | Unassigned | 823_0  | Clustered           | 124 VC_823_0 | 124 | 0.9492 | 1          | 0.9492 | 0 | 0 | 0 | 1 Ref      |
| MW042806 | Unassigned | Unassigned | Unassigned | 823_0  | Clustered           | 124 VC_823_0 | 124 | 0.9492 | 1          | 0.9492 | 0 | 0 | 0 | 1 Ref      |
| MW042807 | Unassigned | Unassigned | Unassigned | 823_0  | Clustered           | 124 VC_823_0 | 124 | 0.9492 | 1          | 0.9492 | 0 | 0 | 0 | 1 Ref      |
| MW042808 | Unassigned | Unassigned | Unassigned | 823_0  | Clustered           | 124 VC_823_0 | 124 | 0.9492 | 1          | 0.9492 | 0 | 0 | 0 | 1 Ref      |
| MW042809 | Unassigned | Unassigned | Unassigned | 823_0  | Clustered           | 124 VC_823_0 | 124 | 0.9492 | 1          | 0.9492 | 0 | 0 | 0 | 1 Ref      |
| MW042810 | Unassigned | Unassigned | Unassigned | 823_0  | Clustered           | 124 VC_823_0 | 124 | 0.9492 | 1          | 0.9492 | 0 | 0 | 0 | 1 Ref      |
| MW042811 | Unassigned | Unassigned | Unassigned | 823_0  | Clustered           | 124 VC_823_0 | 124 | 0.9492 | 1          | 0.9492 | 0 | 0 | 0 | 1 Ref      |
| MW042812 | Unassigned | Unassigned | Unassigned | 823_0  | Clustered           | 124 VC_823_0 | 124 | 0.9492 | 1          | 0.9492 | 0 | 0 | 0 | 1 Ref      |
| MW043865 | Unassigned | Unassigned | Unassigned | 988_0  | Clustered           | 2 VC_988_0   | 2   | 0.1586 | 0.95268934 | 0.1511 | 0 | 0 | 0 | 1 Ref      |
| MW055901 | Unassigned | Unassigned | Unassigned | 1177_0 | Clustered           | 14 VC_1177_0 | 14  | 0.7847 | 1          | 0.7847 | 0 | 0 | 0 | 0.989 Ref  |
| MW055902 | Unassigned | Unassigned | Unassigned | 519_0  | Clustered           | 39 VC_519_0  | 39  | 0.8156 | 1          | 0.8156 | 0 | 0 | 0 | 1 Ref      |
| MW055903 | Unassigned | Unassigned | Unassigned | 1343_0 | Clustered           | 21 VC_1343_0 | 21  | 0.9843 | 1          | 0.9843 | 0 | 0 | 0 | 1 Ref      |
| MW055904 | Unassigned | Unassigned | Unassigned | 221_0  | Clustered           | 22 VC_221_0  | 22  | 0.7447 | 1          | 0.7447 | 0 | 0 | 0 | 1 Ref      |
| MW055905 | Unassigned | Unassigned | Unassigned | 872_0  | Clustered           | 31 VC_872_0  | 31  | 0.8151 | 1          | 0.8151 | 0 | 0 | 0 | 0.8194 Ref |
| MW055906 | Unassigned | Unassigned | Unassigned | 372_2  | Clustered           | 5 VC_372_2   | 5   | 0.072  | 0.99999997 | 0.072  | 0 | 0 | 0 | 0.9 Ref    |
| MW055907 | Unassigned | Unassigned | Unassigned | 1344_0 | Clustered           | 78 VC_1344_0 | 78  | 0.9732 | 1          | 0.9732 | 0 | 0 | 0 | 1 Ref      |
| MW055908 | Unassigned | Unassigned | Unassigned | 1175_0 | Clustered           | 22 VC_1175_0 | 22  | 0.4562 | 1          | 0.4562 | 0 | 0 | 0 | 1 Ref      |
| MW055909 | Unassigned | Unassigned | Unassigned | 1344_0 | Clustered           | 78 VC_1344_0 | 78  | 0.9732 | 1          | 0.9732 | 0 | 0 | 0 | 1 Ref      |
| MW055910 | Unassigned | Unassigned | Unassigned | 1207_0 | Clustered           | 29 VC_1207_0 | 29  | 0.8225 | 1          | 0.8225 | 0 | 0 | 0 | 1 Ref      |
| MW055911 | Unassigned | Unassigned | Unassigned | 1240_0 | Clustered           | 82 VC_1240_0 | 82  | 0.7945 | 1          | 0.7945 | 0 | 0 | 0 | 1 Ref      |
| MW055912 | Unassigned | Unassigned | Unassigned | 1164_0 | Clustered           | 25 VC_1164_0 | 25  | 0.7312 | 1          | 0.7312 | 0 | 0 | 0 | 1 Ref      |
| MW055914 | Unassigned | Unassigned | Unassigned | 1360_0 | Clustered           | 31 VC_1360_0 | 31  | 0.8837 | 1          | 0.8837 | 0 | 0 | 0 | 1 Ref      |
| MW055915 | Unassigned | Unassigned | Unassigned | 520_61 | Clustered/Singleton | 1 VC_520_61  | 1   | 0      | 1          | 0      | 0 | 0 | 0 | 1 Ref      |
| MW056501 | Unassigned | Unassigned | Unassigned | 699_0  | Clustered           | 71 VC_699_0  | 71  | 0.9352 | 1          | 0.9352 | 0 | 0 | 0 | 1 Ref      |
| MW056502 | Unassigned | Unassigned | Unassigned | 699_0  | Clustered           | 71 VC_699_0  | 71  | 0.9352 | 1          | 0.9352 | 0 | 0 | 0 | 1 Ref      |
| MW056503 | Unassigned | Unassigned | Unassigned | 699_0  | Clustered           | 71 VC_699_0  | 71  | 0.9352 | 1          | 0.9352 | 0 | 0 | 0 | 1 Ref      |
| MW057854 | Unassigned | Unassigned | Unassigned | 396_0  | Clustered           | 2 VC_396_0   | 2   | 0.0714 | 0.95759359 | 0.0684 | 0 | 0 | 0 | 1 Ref      |
| MW057855 | Unassigned | Unassigned | Unassigned | 242_1  | Clustered           | 20 VC_242_1  | 20  | 0.684  | 1          | 0.684  | 0 | 0 | 0 | 0.8368 Ref |
| MW057857 | Unassigned | Unassigned | Unassigned | 193_0  | Clustered           | 2 VC_193_0   | 2   | 0.0321 | 0.95762656 | 0.0308 | 0 | 0 | 0 | 1 Ref      |
| MW057858 | Unassigned | Unassigned | Unassigned | 288_4  | Clustered/Singleton | 1 VC_288_4   | 1   | 0      | 1          | 0      | 0 | 0 | 0 | 1 Ref      |
| MW057859 | Unassigned | Unassigned | Unassigned | 51_0   | Clustered           | 10 VC_51_0   | 10  | 0.1741 | 1          | 0.1741 | 0 | 0 | 0 | 1 Ref      |
| MW057860 | Unassigned | Unassigned | Unassigned | 592_0  | Clustered           | 50 VC_592_0  | 50  | 0.7314 | 1          | 0.7314 | 0 | 0 | 0 | 1 Ref      |
| MW057918 | Unassigned | Unassigned | Unassigned | 456_0  | Clustered           | 62 VC_456_0  | 62  | 0.9026 | 1          | 0.9026 | 0 | 0 | 0 | 1 Ref      |
| MW057919 | Unassigned | Unassigned | Unassigned | 344_0  | Clustered           | 21 VC_344_0  | 21  | 0.5436 | 1          | 0.5436 | 0 | 0 | 0 | 1 Ref      |
| MW057920 | Unassigned | Unassigned | Unassigned | 898_0  | Clustered           | 10 VC_898_0  | 10  | 0.7284 | 1          | 0.7284 | 0 | 0 | 0 | 1 Ref      |
| MW067000 | Unassigned | Unassigned | Unassigned | 673_0  | Clustered           | 15 VC_673_0  | 15  | 0.8234 | 1          | 0.8234 | 0 | 0 | 0 | 0.7619 Ref |
| MW067001 | Unassigned | Unassigned | Unassigned | 673_0  | Clustered           | 15 VC_673_0  | 15  | 0.8234 | 1          | 0.8234 | 0 | 0 | 0 | 0.7619 Ref |
| MW067002 | Unassigned | Unassigned | Unassigned | 673_0  | Clustered           | 15 VC_673_0  | 15  | 0.8234 | 1          | 0.8234 | 0 | 0 | 0 | 0.7619 Ref |
| MW067003 | Unassigned | Unassigned | Unassigned | 673_0  | Clustered           | 15 VC_673_0  | 15  | 0.8234 | 1          | 0.8234 | 0 | 0 | 0 | 0.7619 Ref |
| MW072790 | Unassigned | Unassigned | Unassigned | 3_0    | Clustered           | 17 VC_3_0    | 17  | 0.5639 | 1          | 0.5639 | 0 | 0 | 0 | 1 Ref      |
| MW073017 | Unassigned | Unassigned | Unassigned | 478_1  | Clustered/Singleton | 1 VC_478_1   | 1   | 0      | 1          | 0      | 0 | 0 | 0 | 1 Ref      |
| MW073100 | Unassigned | Unassigned | Unassigned | 853_0  | Clustered           | 2 VC_853_0   | 2   | 0.27   | 0.72985431 | 0.1971 | 0 | 0 | 0 | 1 Ref      |
| MW074885 | Unassigned | Unassigned | Unassigned | 392_0  | Clustered           | 126 VC_392_0 | 126 | 0.9621 | 1          | 0.9621 | 0 | 0 | 0 | 1 Ref      |
| MW084976 | Unassigned | Unassigned | Unassigned | 475_7  | Clustered/Singleton | 1 VC_475_7   | 1   | 0      | 1          | 0      | 0 | 0 | 0 | 1 Ref      |
| MW091529 | Unassigned | Unassigned | Unassigned | 466_0  | Clustered           | 3 VC_466_0   | 3   | 0.3264 | 0.99747305 | 0.3255 | 0 | 0 | 0 | 1 Ref      |
| MW114771 | Unassigned | Unassigned | Unassigned | 614_0  | Clustered           | 5 VC_614_0   | 5   | 0.2395 | 0.99999997 | 0.2395 | 0 | 0 | 0 | 1 Ref      |
| MW117144 | Unassigned | Unassigned | Unassigned | 423_0  | Clustered           | 45 VC_423_0  | 45  | 0.9484 | 1          | 0.9484 | 0 | 0 | 0 | 1 Ref      |
| MW117966 | Unassigned | Unassigned | Unassigned | 433_9  | Clustered/Singleton | 1 VC_433_9   | 1   | 0      | 1          | 0      | 0 | 0 | 0 | 1 Ref      |
| MW119258 | Unassigned | Unassigned | Unassigned | 460_0  | Clustered           | 19 VC_460_0  | 19  | 0.3744 | 1          | 0.3744 | 0 | 0 | 0 | 1 Ref      |
| MW119570 | Unassigned | Unassigned | Unassigned | 761_0  | Clustered           | 67 VC_761_0  | 67  | 0.8947 | 1          | 0.8947 | 0 | 0 | 0 | 1 Ref      |
| MW132713 | Unassigned | Unassigned | Unassigned | 406_0  | Clustered           | 11 VC_406_0  | 11  | 0.9449 | 1          | 0.9449 | 0 | 0 | 0 | 1 Ref      |
| MW132714 | Unassigned | Unassigned | Unassigned | 546_8  | Clustered/Singleton | 1 VC_546_8   | 1   | 0      | 1          | 0      | 0 | 0 | 0 | 1 Ref      |
| MW145139 | Unassigned | Unassigned | Unassigned | 591_0  | Clustered           | 14 VC_591_0  | 14  | 0.5184 | 1          | 0.5184 | 0 | 0 | 0 | 1 Ref      |
| MW145539 | Unassigned | Unassigned | Unassigned | 872_0  | Clustered           | 31 VC_872_0  | 31  | 0.8151 | 1          | 0.8151 | 0 | 0 | 0 | 0.8194 Ref |
| MW147366 | Unassigned | Unassigned | Unassigned | 7_0    | Clustered           | 28 VC_7_0    | 28  | 0.3916 | 1          | 0.3916 | 0 | 0 | 0 | 0.9947 Ref |
| MW147367 | Unassigned | Unassigned | Unassigned | 433_7  | Clustered/Singleton | 1 VC_433_7   | 1   | 0      | 1          | 0      | 0 | 0 | 0 | 1 Ref      |
| MW147598 | Unassigned | Unassigned | Unassigned | 792_0  | Clustered           | 35 VC_792_0  | 35  | 0.9828 | 1          | 0.9828 | 0 | 0 | 0 | 1 Ref      |
| MW147599 | Unassigned | Unassigned | Unassigned | 792_0  | Clustered           | 35 VC_792_0  | 35  | 0.9828 | 1          | 0.9828 | 0 | 0 | 0 | 1 Ref      |
| MW147600 | Unassigned | Unassigned | Unassigned | 792_0  | Clustered           | 35 VC_792_0  | 35  | 0.9828 | 1          | 0.9828 | 0 | 0 | 0 | 1 Ref      |
| MW147601 | Unassigned | Unassigned | Unassigned | 792_0  | Clustered           | 35 VC_792_0  | 35  | 0.9828 | 1          | 0.9828 | 0 | 0 | 0 | 1 Ref      |
| MW147602 | Unassigned | Unassigned | Unassigned | 792_0  | Clustered           | 35 VC_792_0  | 35  | 0.9828 | 1          | 0.9828 | 0 | 0 | 0 | 1 Ref      |
| MW147603 | Unassigned | Unassigned | Unassigned | 386_0  | Clustered           | 49 VC_386_0  | 49  | 0.7941 | 1          | 0.7941 | 0 | 0 | 0 | 1 Ref      |
| MW149272 | Unassigned | Unassigned | Unassigned | 592_0  | Clustered           | 50 VC_592_0  | 50  | 0.7314 | 1          | 0.7314 | 0 | 0 | 0 | 1 Ref      |
| MW149273 | Unassigned | Unassigned | Unassigned | 190_23 | Clustered           | 10 VC_190_23 | 10  | 0.0704 | 1          | 0.0704 | 0 | 0 | 0 | 0.8444 Ref |
| MW149274 | Unassigned | Unassigned | Unassigned | 290_5  | Clustered           | 14 VC_290_5  | 14  | 0.1422 | 1          | 0.1422 | 0 | 0 | 0 | 0.9231 Ref |
| MW149275 | Unassigned | Unassigned | Unassigned | 190_23 | Clustered           | 10 VC_190_23 | 10  | 0.0704 | 1          | 0.0704 | 0 | 0 | 0 | 0.8444 Ref |
| MW161461 | Unassigned | Unassigned | Unassigned | 765_0  | Clustered           | 132 VC_765_0 | 132 | 1      | 1          | 1      | 0 | 0 | 0 | 1 Ref      |
| MW161462 | Unassigned | Unassigned | Unassigned | 765_0  | Clustered           | 132 VC_765_0 | 132 | 1      | 1          | 1      | 0 | 0 | 0 | 1 Ref      |



|          |            |            |            |        |           |              |     |        |            |        |   |   |   |            |
|----------|------------|------------|------------|--------|-----------|--------------|-----|--------|------------|--------|---|---|---|------------|
| MW161463 | Unassigned | Unassigned | Unassigned | 765_0  | Clustered | 132 VC_765_0 | 132 | 1      | 1          | 1      | 0 | 0 | 0 | 1 Ref      |
| MW161464 | Unassigned | Unassigned | Unassigned | 765_0  | Clustered | 132 VC_765_0 | 132 | 1      | 1          | 1      | 0 | 0 | 0 | 1 Ref      |
| MW161465 | Unassigned | Unassigned | Unassigned | 765_0  | Clustered | 132 VC_765_0 | 132 | 1      | 1          | 1      | 0 | 0 | 0 | 1 Ref      |
| MW161466 | Unassigned | Unassigned | Unassigned | 765_0  | Clustered | 132 VC_765_0 | 132 | 1      | 1          | 1      | 0 | 0 | 0 | 1 Ref      |
| MW161467 | Unassigned | Unassigned | Unassigned | 765_0  | Clustered | 132 VC_765_0 | 132 | 1      | 1          | 1      | 0 | 0 | 0 | 1 Ref      |
| MW161468 | Unassigned | Unassigned | Unassigned | 765_0  | Clustered | 132 VC_765_0 | 132 | 1      | 1          | 1      | 0 | 0 | 0 | 1 Ref      |
| MW175414 | Unassigned | Unassigned | Unassigned | 779_0  | Clustered | 37 VC_779_0  | 37  | 0.5682 | 1          | 0.5682 | 0 | 0 | 0 | 1 Ref      |
| MW175491 | Unassigned | Unassigned | Unassigned | 78_3   | Clustered | 11 VC_78_3   | 11  | 0.2572 | 1          | 0.2572 | 0 | 0 | 0 | 1 Ref      |
| MW175890 | Unassigned | Unassigned | Unassigned | 847_1  | Clustered | 26 VC_847_1  | 26  | 0.6323 | 1          | 0.6323 | 0 | 0 | 0 | 0.9815 Ref |
| MW176032 | Unassigned | Unassigned | Unassigned | 608_0  | Clustered | 5 VC_608_0   | 5   | 0.4331 | 0.99999996 | 0.4331 | 0 | 0 | 0 | 1 Ref      |
| MW176033 | Unassigned | Unassigned | Unassigned | 670_0  | Clustered | 2 VC_670_0   | 2   | 0.6875 | 0.72985431 | 0.5018 | 0 | 0 | 0 | 1 Ref      |
| MW176034 | Unassigned | Unassigned | Unassigned | 608_0  | Clustered | 5 VC_608_0   | 5   | 0.4331 | 0.99999996 | 0.4331 | 0 | 0 | 0 | 1 Ref      |
| MW192778 | Unassigned | Unassigned | Unassigned | 7_0    | Clustered | 28 VC_7_0    | 28  | 0.3916 | 1          | 0.3916 | 0 | 0 | 0 | 0.9947 Ref |
| MW201959 | Unassigned | Unassigned | Unassigned | 637_0  | Clustered | 115 VC_637_0 | 115 | 0.731  | 1          | 0.731  | 0 | 0 | 0 | 0.8764 Ref |
| MW202412 | Unassigned | Unassigned | Unassigned | 995_0  | Clustered | 69 VC_995_0  | 69  | 0.8547 | 1          | 0.8547 | 0 | 0 | 0 | 1 Ref      |
| MW202414 | Unassigned | Unassigned | Unassigned | 995_0  | Clustered | 69 VC_995_0  | 69  | 0.8547 | 1          | 0.8547 | 0 | 0 | 0 | 1 Ref      |
| MW202445 | Unassigned | Unassigned | Unassigned | 1077_0 | Clustered | 48 VC_1077_0 | 48  | 0.8525 | 1          | 0.8525 | 0 | 0 | 0 | 1 Ref      |
| MW202455 | Unassigned | Unassigned | Unassigned | 427_0  | Clustered | 3 VC_427_0   | 3   | 0.0627 | 0.96830121 | 0.0608 | 0 | 0 | 0 | 1 Ref      |
| MW202462 | Unassigned | Unassigned | Unassigned | 1004_0 | Clustered | 2 VC_1004_0  | 2   | 0.4638 | 0.94225536 | 0.437  | 0 | 0 | 0 | 1 Ref      |
| MW202464 | Unassigned | Unassigned | Unassigned | 1082_0 | Clustered | 3 VC_1082_0  | 3   | 0.6925 | 0.61954664 | 0.429  | 0 | 0 | 0 | 1 Ref      |
| MW202466 | Unassigned | Unassigned | Unassigned | 995_0  | Clustered | 69 VC_995_0  | 69  | 0.8547 | 1          | 0.8547 | 0 | 0 | 0 | 1 Ref      |
| MW202471 | Unassigned | Unassigned | Unassigned | 995_0  | Clustered | 69 VC_995_0  | 69  | 0.8547 | 1          | 0.8547 | 0 | 0 | 0 | 1 Ref      |
| MW202473 | Unassigned | Unassigned | Unassigned | 527_0  | Clustered | 3 VC_527_0   | 3   | 0.2387 | 0.99839883 | 0.2383 | 0 | 0 | 0 | 1 Ref      |
| MW202475 | Unassigned | Unassigned | Unassigned | 163_0  | Clustered | 2 VC_163_0   | 2   | 0.2865 | 0.94106069 | 0.2696 | 0 | 0 | 0 | 1 Ref      |
| MW202478 | Unassigned | Unassigned | Unassigned | 527_0  | Clustered | 3 VC_527_0   | 3   | 0.2387 | 0.99839883 | 0.2383 | 0 | 0 | 0 | 1 Ref      |
| MW202486 | Unassigned | Unassigned | Unassigned | 1444_0 | Clustered | 3 VC_1444_0  | 3   | 1      | 0          | 0      | 0 | 0 | 0 | 1 Ref      |
| MW202489 | Unassigned | Unassigned | Unassigned | 341_0  | Clustered | 3 VC_341_0   | 3   | 0.2522 | 0.9396546  | 0.237  | 0 | 0 | 0 | 1 Ref      |
| MW202496 | Unassigned | Unassigned | Unassigned | 609_0  | Clustered | 4 VC_609_0   | 4   | 0.489  | 0.99992419 | 0.489  | 0 | 0 | 0 | 1 Ref      |
| MW202520 | Unassigned | Unassigned | Unassigned | 808_0  | Clustered | 2 VC_808_0   | 2   | 0.3852 | 0.94765994 | 0.3651 | 0 | 0 | 0 | 1 Ref      |
| MW202524 | Unassigned | Unassigned | Unassigned | 1446_0 | Clustered | 3 VC_1446_0  | 3   | 1      | 0          | 0      | 0 | 0 | 0 | 1 Ref      |
| MW202535 | Unassigned | Unassigned | Unassigned | 327_0  | Clustered | 12 VC_327_0  | 12  | 0.8925 | 1          | 0.8925 | 0 | 0 | 0 | 1 Ref      |
| MW202544 | Unassigned | Unassigned | Unassigned | 1004_0 | Clustered | 2 VC_1004_0  | 2   | 0.4638 | 0.94225536 | 0.437  | 0 | 0 | 0 | 1 Ref      |
| MW202545 | Unassigned | Unassigned | Unassigned | 1407_0 | Clustered | 2 VC_1407_0  | 2   | 0.8176 | 0.81445332 | 0.6659 | 0 | 0 | 0 | 1 Ref      |
| MW202549 | Unassigned | Unassigned | Unassigned | 995_0  | Clustered | 69 VC_995_0  | 69  | 0.8547 | 1          | 0.8547 | 0 | 0 | 0 | 1 Ref      |
| MW202557 | Unassigned | Unassigned | Unassigned | 806_0  | Clustered | 3 VC_806_0   | 3   | 0.532  | 0.99824026 | 0.5311 | 0 | 0 | 0 | 1 Ref      |
| MW202566 | Unassigned | Unassigned | Unassigned | 1223_0 | Clustered | 2 VC_1223_0  | 2   | 1      | 1          | 1      | 0 | 0 | 0 | 1 Ref      |
| MW202572 | Unassigned | Unassigned | Unassigned | 1445_0 | Clustered | 4 VC_1445_0  | 4   | 0.9883 | 0.99615702 | 0.9845 | 0 | 0 | 0 | 1 Ref      |
| MW202581 | Unassigned | Unassigned | Unassigned | 197_0  | Clustered | 5 VC_197_0   | 5   | 0.1324 | 0.84698401 | 0.1122 | 0 | 0 | 0 | 1 Ref      |
| MW202587 | Unassigned | Unassigned | Unassigned | 995_0  | Clustered | 69 VC_995_0  | 69  | 0.8547 | 1          | 0.8547 | 0 | 0 | 0 | 1 Ref      |
| MW202591 | Unassigned | Unassigned | Unassigned | 1444_0 | Clustered | 3 VC_1444_0  | 3   | 1      | 0          | 0      | 0 | 0 | 0 | 1 Ref      |
| MW202596 | Unassigned | Unassigned | Unassigned | 1222_0 | Clustered | 3 VC_1222_0  | 3   | 1      | 0          | 0      | 0 | 0 | 0 | 1 Ref      |
| MW202601 | Unassigned | Unassigned | Unassigned | 1447_0 | Clustered | 2 VC_1447_0  | 2   | 1      | 1          | 1      | 0 | 0 | 0 | 1 Ref      |
| MW202604 | Unassigned | Unassigned | Unassigned | 1447_0 | Clustered | 2 VC_1447_0  | 2   | 1      | 1          | 1      | 0 | 0 | 0 | 1 Ref      |
| MW202608 | Unassigned | Unassigned | Unassigned | 1448_0 | Clustered | 5 VC_1448_0  | 5   | 1      | 1          | 1      | 0 | 0 | 0 | 1 Ref      |
| MW202609 | Unassigned | Unassigned | Unassigned | 1077_0 | Clustered | 48 VC_1077_0 | 48  | 0.8525 | 1          | 0.8525 | 0 | 0 | 0 | 1 Ref      |
| MW202613 | Unassigned | Unassigned | Unassigned | 1442_0 | Clustered | 2 VC_1442_0  | 2   | 0.9685 | 0.86822376 | 0.8408 | 0 | 0 | 0 | 1 Ref      |
| MW202618 | Unassigned | Unassigned | Unassigned | 1089_0 | Clustered | 2 VC_1089_0  | 2   | 0.546  | 0.5        | 0.273  | 0 | 0 | 0 | 1 Ref      |
| MW202622 | Unassigned | Unassigned | Unassigned | 1449_0 | Clustered | 2 VC_1449_0  | 2   | 1      | 1          | 1      | 0 | 0 | 0 | 1 Ref      |
| MW202631 | Unassigned | Unassigned | Unassigned | 1445_0 | Clustered | 4 VC_1445_0  | 4   | 0.9883 | 0.99615702 | 0.9845 | 0 | 0 | 0 | 1 Ref      |
| MW202637 | Unassigned | Unassigned | Unassigned | 1443_0 | Clustered | 2 VC_1443_0  | 2   | 0.8611 | 0.76024994 | 0.6547 | 0 | 0 | 0 | 1 Ref      |
| MW202642 | Unassigned | Unassigned | Unassigned | 1450_0 | Clustered | 3 VC_1450_0  | 3   | 1      | 1          | 1      | 0 | 0 | 0 | 1 Ref      |
| MW202645 | Unassigned | Unassigned | Unassigned | 1445_0 | Clustered | 4 VC_1445_0  | 4   | 0.9883 | 0.99615702 | 0.9845 | 0 | 0 | 0 | 1 Ref      |
| MW202655 | Unassigned | Unassigned | Unassigned | 806_0  | Clustered | 3 VC_806_0   | 3   | 0.532  | 0.99824026 | 0.5311 | 0 | 0 | 0 | 1 Ref      |
| MW202657 | Unassigned | Unassigned | Unassigned | 1451_0 | Clustered | 2 VC_1451_0  | 2   | 1      | 1          | 1      | 0 | 0 | 0 | 1 Ref      |
| MW202658 | Unassigned | Unassigned | Unassigned | 1449_0 | Clustered | 2 VC_1449_0  | 2   | 1      | 1          | 1      | 0 | 0 | 0 | 1 Ref      |
| MW202665 | Unassigned | Unassigned | Unassigned | 117_0  | Clustered | 9 VC_117_0   | 9   | 0.9977 | 0.98988637 | 0.9876 | 0 | 0 | 0 | 1 Ref      |
| MW202671 | Unassigned | Unassigned | Unassigned | 1082_0 | Clustered | 3 VC_1082_0  | 3   | 0.6925 | 0.61954664 | 0.429  | 0 | 0 | 0 | 1 Ref      |
| MW202674 | Unassigned | Unassigned | Unassigned | 808_0  | Clustered | 2 VC_808_0   | 2   | 0.3852 | 0.94765994 | 0.3651 | 0 | 0 | 0 | 1 Ref      |
| MW202680 | Unassigned | Unassigned | Unassigned | 1368_0 | Clustered | 2 VC_1368_0  | 2   | 1      | 1          | 1      | 0 | 0 | 0 | 1 Ref      |
| MW202703 | Unassigned | Unassigned | Unassigned | 1243_0 | Clustered | 52 VC_1243_0 | 52  | 0.9126 | 0.92708311 | 0.8461 | 0 | 0 | 0 | 1 Ref      |
| MW202711 | Unassigned | Unassigned | Unassigned | 609_0  | Clustered | 4 VC_609_0   | 4   | 0.489  | 0.99992419 | 0.489  | 0 | 0 | 0 | 1 Ref      |
| MW202718 | Unassigned | Unassigned | Unassigned | 1446_0 | Clustered | 3 VC_1446_0  | 3   | 1      | 0          | 0      | 0 | 0 | 0 | 1 Ref      |
| MW202725 | Unassigned | Unassigned | Unassigned | 1448_0 | Clustered | 5 VC_1448_0  | 5   | 1      | 1          | 1      | 0 | 0 | 0 | 1 Ref      |
| MW202732 | Unassigned | Unassigned | Unassigned | 198_0  | Clustered | 28 VC_198_0  | 28  | 0.2429 | 0.99971175 | 0.2429 | 0 | 0 | 0 | 1 Ref      |
| MW202738 | Unassigned | Unassigned | Unassigned | 527_0  | Clustered | 3 VC_527_0   | 3   | 0.2387 | 0.99839883 | 0.2383 | 0 | 0 | 0 | 1 Ref      |
| MW202742 | Unassigned | Unassigned | Unassigned | 1445_0 | Clustered | 4 VC_1445_0  | 4   | 0.9883 | 0.99615702 | 0.9845 | 0 | 0 | 0 | 1 Ref      |
| MW202743 | Unassigned | Unassigned | Unassigned | 1446_0 | Clustered | 3 VC_1446_0  | 3   | 1      | 0          | 0      | 0 | 0 | 0 | 1 Ref      |
| MW202744 | Unassigned | Unassigned | Unassigned | 117_0  | Clustered | 9 VC_117_0   | 9   | 0.9977 | 0.98988637 | 0.9876 | 0 | 0 | 0 | 1 Ref      |
| MW202748 | Unassigned | Unassigned | Unassigned | 1442_0 | Clustered | 2 VC_1442_0  | 2   | 0.9685 | 0.86822376 | 0.8408 | 0 | 0 | 0 | 1 Ref      |
| MW202753 | Unassigned | Unassigned | Unassigned | 1452_0 | Clustered | 2 VC_1452_0  | 2   | 1      | 1          | 1      | 0 | 0 | 0 | 1 Ref      |
| MW202760 | Unassigned | Unassigned | Unassigned | 1077_0 | Clustered | 48 VC_1077_0 | 48  | 0.8525 | 1          | 0.8525 | 0 | 0 | 0 | 1 Ref      |
| MW202766 | Unassigned | Unassigned | Unassigned | 1444_0 | Clustered | 3 VC_1444_0  | 3   | 1      | 0          | 0      | 0 | 0 | 0 | 1 Ref      |
| MW202777 | Unassigned | Unassigned | Unassigned | 466_0  | Clustered | 3 VC_466_0   | 3   | 0.3264 | 0.99747305 | 0.3255 | 0 | 0 | 0 | 1 Ref      |
| MW202785 | Unassigned | Unassigned | Unassigned | 760_0  | Clustered | 3 VC_760_0   | 3   | 0.7281 | 0.9859071  | 0.7179 | 0 | 0 | 0 | 1 Ref      |
| MW202789 | Unassigned | Unassigned | Unassigned | 1443_0 | Clustered | 2 VC_1443_0  | 2   | 0.8611 | 0.76024994 | 0.6547 | 0 | 0 | 0 | 1 Ref      |
| MW202796 | Unassigned | Unassigned | Unassigned | 760_0  | Clustered | 3 VC_760_0   | 3   | 0.7281 | 0.9859071  | 0.7179 | 0 | 0 | 0 | 1 Ref      |
| MW202812 | Unassigned | Unassigned | Unassigned | 1448_0 | Clustered | 5 VC_1448_0  | 5   | 1      | 1          | 1      | 0 | 0 | 0 | 1 Ref      |
| MW202819 | Unassigned | Unassigned | Unassigned | 1077_0 | Clustered | 48 VC_1077_0 | 48  | 0.8525 | 1          | 0.8525 | 0 | 0 | 0 | 1 Ref      |
| MW202824 | Unassigned | Unassigned | Unassigned | 1243_0 | Clustered | 52 VC_1243_0 | 52  | 0.9126 | 0.92708311 | 0.8461 | 0 | 0 | 0 | 1 Ref      |
| MW202825 | Unassigned | Unassigned | Unassigned | 1452_0 | Clustered | 2 VC_1452_0  | 2   | 1      | 1          | 1      | 0 | 0 | 0 | 1 Ref      |
| MW202826 | Unassigned | Unassigned | Unassigned | 1448_0 | Clustered | 5 VC_1448_0  | 5   | 1      | 1          | 1      | 0 | 0 | 0 | 1 Ref      |



|          |            |            |            |        |                     |              |     |        |            |        |   |   |   |            |
|----------|------------|------------|------------|--------|---------------------|--------------|-----|--------|------------|--------|---|---|---|------------|
| MW202842 | Unassigned | Unassigned | Unassigned | 1448_0 | Clustered           | 5 VC_1448_0  | 5   | 1      | 1          | 1      | 0 | 0 | 0 | 1 Ref      |
| MW202843 | Unassigned | Unassigned | Unassigned | 1450_0 | Clustered           | 3 VC_1450_0  | 3   | 1      | 1          | 1      | 0 | 0 | 0 | 1 Ref      |
| MW202847 | Unassigned | Unassigned | Unassigned | 995_0  | Clustered           | 69 VC_995_0  | 69  | 0.8547 | 1          | 0.8547 | 0 | 0 | 0 | 1 Ref      |
| MW202852 | Unassigned | Unassigned | Unassigned | 1450_0 | Clustered           | 3 VC_1450_0  | 3   | 1      | 1          | 1      | 0 | 0 | 0 | 1 Ref      |
| MW202853 | Unassigned | Unassigned | Unassigned | 995_0  | Clustered           | 69 VC_995_0  | 69  | 0.8547 | 1          | 0.8547 | 0 | 0 | 0 | 1 Ref      |
| MW202864 | Unassigned | Unassigned | Unassigned | 1451_0 | Clustered           | 2 VC_1451_0  | 2   | 1      | 1          | 1      | 0 | 0 | 0 | 1 Ref      |
| MW202867 | Unassigned | Unassigned | Unassigned | 163_0  | Clustered           | 2 VC_163_0   | 2   | 0.2865 | 0.94106069 | 0.2696 | 0 | 0 | 0 | 1 Ref      |
| MW202879 | Unassigned | Unassigned | Unassigned | 609_0  | Clustered           | 4 VC_609_0   | 4   | 0.489  | 0.99992419 | 0.489  | 0 | 0 | 0 | 1 Ref      |
| MW202883 | Unassigned | Unassigned | Unassigned | 995_0  | Clustered           | 69 VC_995_0  | 69  | 0.8547 | 1          | 0.8547 | 0 | 0 | 0 | 1 Ref      |
| MW202889 | Unassigned | Unassigned | Unassigned | 198_0  | Clustered           | 28 VC_198_0  | 28  | 0.2429 | 0.99971175 | 0.2429 | 0 | 0 | 0 | 1 Ref      |
| MW202895 | Unassigned | Unassigned | Unassigned | 326_0  | Clustered/Singleton | 1 VC_326_0   | 1   | 0      | 1          | 0      | 0 | 0 | 0 | 1 Ref      |
| MW205203 | Unassigned | Unassigned | Unassigned | 476_0  | Clustered           | 19 VC_476_0  | 19  | 0.7814 | 1          | 0.7814 | 0 | 0 | 0 | 1 Ref      |
| MW206381 | Unassigned | Unassigned | Unassigned | 191_25 | Clustered/Singleton | 1 VC_191_25  | 1   | 0      | 1          | 0      | 0 | 0 | 0 | 1 Ref      |
| MW217515 | Unassigned | Unassigned | Unassigned | 530_0  | Clustered           | 9 VC_530_0   | 9   | 0.8027 | 1          | 0.8027 | 0 | 0 | 0 | 1 Ref      |
| MW218148 | Unassigned | Unassigned | Unassigned | 449_0  | Clustered           | 7 VC_449_0   | 7   | 0.6015 | 1          | 0.6015 | 0 | 0 | 0 | 1 Ref      |
| MW233709 | Unassigned | Unassigned | Unassigned | 290_0  | Clustered           | 10 VC_290_0  | 10  | 0.0981 | 1          | 0.0981 | 0 | 0 | 0 | 1 Ref      |
| MW238767 | Unassigned | Unassigned | Unassigned | 12_0   | Clustered           | 21 VC_12_0   | 21  | 0.2274 | 1          | 0.2274 | 0 | 0 | 0 | 0.9571 Ref |
| MW239157 | Unassigned | Unassigned | Unassigned | 491_0  | Clustered           | 36 VC_491_0  | 36  | 0.5336 | 1          | 0.5336 | 0 | 0 | 0 | 0.9714 Ref |
| MW247144 | Unassigned | Unassigned | Unassigned | 99_0   | Clustered           | 32 VC_99_0   | 32  | 0.8828 | 1          | 0.8828 | 0 | 0 | 0 | 1 Ref      |
| MW247145 | Unassigned | Unassigned | Unassigned | 99_0   | Clustered           | 32 VC_99_0   | 32  | 0.8828 | 1          | 0.8828 | 0 | 0 | 0 | 1 Ref      |
| MW247147 | Unassigned | Unassigned | Unassigned | 99_0   | Clustered           | 32 VC_99_0   | 32  | 0.8828 | 1          | 0.8828 | 0 | 0 | 0 | 1 Ref      |
| MW248466 | Unassigned | Unassigned | Unassigned | 449_0  | Clustered           | 7 VC_449_0   | 7   | 0.6015 | 1          | 0.6015 | 0 | 0 | 0 | 1 Ref      |
| MW250275 | Unassigned | Unassigned | Unassigned | 156_0  | Clustered           | 12 VC_156_0  | 12  | 0.9062 | 1          | 0.9062 | 0 | 0 | 0 | 1 Ref      |
| MW250276 | Unassigned | Unassigned | Unassigned | 878_0  | Clustered           | 32 VC_878_0  | 32  | 0.9965 | 1          | 0.9965 | 0 | 0 | 0 | 1 Ref      |
| MW250641 | Unassigned | Unassigned | Unassigned | 837_0  | Clustered           | 29 VC_837_0  | 29  | 0.9955 | 1          | 0.9955 | 0 | 0 | 0 | 1 Ref      |
| MW250785 | Unassigned | Unassigned | Unassigned | 669_0  | Clustered           | 21 VC_669_0  | 21  | 0.3623 | 1          | 0.3623 | 0 | 0 | 0 | 1 Ref      |
| MW250786 | Unassigned | Unassigned | Unassigned | 849_9  | Clustered/Singleton | 1 VC_849_9   | 1   | 0      | 1          | 0      | 0 | 0 | 0 | 1 Ref      |
| MW250787 | Unassigned | Unassigned | Unassigned | 290_0  | Clustered           | 10 VC_290_0  | 10  | 0.0981 | 1          | 0.0981 | 0 | 0 | 0 | 1 Ref      |
| MW258709 | Unassigned | Unassigned | Unassigned | 451_0  | Clustered           | 80 VC_451_0  | 80  | 0.9991 | 1          | 0.9991 | 0 | 0 | 0 | 1 Ref      |
| MW258710 | Unassigned | Unassigned | Unassigned | 705_0  | Clustered           | 11 VC_705_0  | 11  | 0.8861 | 1          | 0.8861 | 0 | 0 | 0 | 1 Ref      |
| MW258711 | Unassigned | Unassigned | Unassigned | 705_0  | Clustered           | 11 VC_705_0  | 11  | 0.8861 | 1          | 0.8861 | 0 | 0 | 0 | 1 Ref      |
| MW269554 | Unassigned | Unassigned | Unassigned | 598_0  | Clustered           | 4 VC_598_0   | 4   | 0.0597 | 0.99355358 | 0.0593 | 0 | 0 | 0 | 1 Ref      |
| MW269952 | Unassigned | Unassigned | Unassigned | 290_1  | Clustered           | 8 VC_290_1   | 8   | 0.0757 | 1          | 0.0757 | 0 | 0 | 0 | 0.8571 Ref |
| MW272540 | Unassigned | Unassigned | Unassigned | 443_0  | Clustered           | 2 VC_443_0   | 2   | 0.029  | 0.87409603 | 0.0253 | 0 | 0 | 0 | 1 Ref      |
| MW273920 | Unassigned | Unassigned | Unassigned | 486_0  | Clustered           | 18 VC_486_0  | 18  | 0.887  | 1          | 0.887  | 0 | 0 | 0 | 1 Ref      |
| MW273922 | Unassigned | Unassigned | Unassigned | 486_0  | Clustered           | 18 VC_486_0  | 18  | 0.887  | 1          | 0.887  | 0 | 0 | 0 | 1 Ref      |
| MW273923 | Unassigned | Unassigned | Unassigned | 486_0  | Clustered           | 18 VC_486_0  | 18  | 0.887  | 1          | 0.887  | 0 | 0 | 0 | 1 Ref      |
| MW273924 | Unassigned | Unassigned | Unassigned | 486_0  | Clustered           | 18 VC_486_0  | 18  | 0.887  | 1          | 0.887  | 0 | 0 | 0 | 1 Ref      |
| MW273925 | Unassigned | Unassigned | Unassigned | 486_0  | Clustered           | 18 VC_486_0  | 18  | 0.887  | 1          | 0.887  | 0 | 0 | 0 | 1 Ref      |
| MW273926 | Unassigned | Unassigned | Unassigned | 486_0  | Clustered           | 18 VC_486_0  | 18  | 0.887  | 1          | 0.887  | 0 | 0 | 0 | 1 Ref      |
| MW281503 | Unassigned | Unassigned | Unassigned | 883_1  | Clustered           | 12 VC_883_1  | 12  | 0.2441 | 1          | 0.2441 | 0 | 0 | 0 | 1 Ref      |
| MW286156 | Unassigned | Unassigned | Unassigned | 455_0  | Clustered           | 18 VC_455_0  | 18  | 0.4598 | 1          | 0.4598 | 0 | 0 | 0 | 1 Ref      |
| MW286157 | Unassigned | Unassigned | Unassigned | 283_7  | Clustered/Singleton | 1 VC_283_7   | 1   | 0      | 1          | 0      | 0 | 0 | 0 | 1 Ref      |
| MW286254 | Unassigned | Unassigned | Unassigned | 96_0   | Clustered           | 30 VC_96_0   | 30  | 0.718  | 1          | 0.718  | 0 | 0 | 0 | 1 Ref      |
| MW291012 | Unassigned | Unassigned | Unassigned | 558_65 | Clustered           | 2 VC_558_65  | 2   | 0.0032 | 0.61174182 | 0.0019 | 0 | 0 | 0 | 1 Ref      |
| MW291013 | Unassigned | Unassigned | Unassigned | 1175_0 | Clustered           | 22 VC_1175_0 | 22  | 0.4562 | 1          | 0.4562 | 0 | 0 | 0 | 1 Ref      |
| MW291014 | Unassigned | Unassigned | Unassigned | 1071_0 | Clustered           | 20 VC_1071_0 | 20  | 0.3268 | 1          | 0.3268 | 0 | 0 | 0 | 0.9842 Ref |
| MW291015 | Unassigned | Unassigned | Unassigned | 954_0  | Clustered           | 13 VC_954_0  | 13  | 0.863  | 1          | 0.863  | 0 | 0 | 0 | 1 Ref      |
| MW291016 | Unassigned | Unassigned | Unassigned | 1176_0 | Clustered           | 41 VC_1176_0 | 41  | 0.9558 | 1          | 0.9558 | 0 | 0 | 0 | 0.9976 Ref |
| MW291018 | Unassigned | Unassigned | Unassigned | 1360_0 | Clustered           | 31 VC_1360_0 | 31  | 0.8837 | 1          | 0.8837 | 0 | 0 | 0 | 1 Ref      |
| MW291019 | Unassigned | Unassigned | Unassigned | 517_1  | Clustered           | 108 VC_517_1 | 108 | 0.8483 | 1          | 0.8483 | 0 | 0 | 0 | 0.9955 Ref |
| MW291020 | Unassigned | Unassigned | Unassigned | 1344_0 | Clustered           | 78 VC_1344_0 | 78  | 0.9732 | 1          | 0.9732 | 0 | 0 | 0 | 1 Ref      |
| MW291021 | Unassigned | Unassigned | Unassigned | 1158_0 | Clustered           | 3 VC_1158_0  | 3   | 0.3179 | 0.99335558 | 0.3158 | 0 | 0 | 0 | 1 Ref      |
| MW291022 | Unassigned | Unassigned | Unassigned | 799_1  | Clustered           | 27 VC_799_1  | 27  | 0.8611 | 1          | 0.8611 | 0 | 0 | 0 | 1 Ref      |
| MW291023 | Unassigned | Unassigned | Unassigned | 551_0  | Clustered           | 16 VC_551_0  | 16  | 0.0915 | 1          | 0.0915 | 0 | 0 | 0 | 0.6667 Ref |
| MW291024 | Unassigned | Unassigned | Unassigned | 889_0  | Clustered           | 16 VC_889_0  | 16  | 0.2969 | 1          | 0.2969 | 0 | 0 | 0 | 1 Ref      |
| MW291025 | Unassigned | Unassigned | Unassigned | 1343_0 | Clustered           | 21 VC_1343_0 | 21  | 0.9843 | 1          | 0.9843 | 0 | 0 | 0 | 1 Ref      |
| MW291026 | Unassigned | Unassigned | Unassigned | 1240_0 | Clustered           | 82 VC_1240_0 | 82  | 0.7945 | 1          | 0.7945 | 0 | 0 | 0 | 1 Ref      |
| MW291027 | Unassigned | Unassigned | Unassigned | 956_0  | Clustered           | 39 VC_956_0  | 39  | 1      | 1          | 1      | 0 | 0 | 0 | 1 Ref      |
| MW291028 | Unassigned | Unassigned | Unassigned | 761_0  | Clustered           | 67 VC_761_0  | 67  | 0.8947 | 1          | 0.8947 | 0 | 0 | 0 | 1 Ref      |
| MW296032 | Unassigned | Unassigned | Unassigned | 812_0  | Clustered           | 3 VC_812_0   | 3   | 0.1174 | 0.99842379 | 0.1172 | 0 | 0 | 0 | 1 Ref      |
| MW296865 | Unassigned | Unassigned | Unassigned | 329_18 | Clustered           | 7 VC_329_18  | 7   | 0.0328 | 1          | 0.0328 | 0 | 0 | 0 | 0.8095 Ref |
| MW296877 | Unassigned | Unassigned | Unassigned | 385_0  | Clustered           | 51 VC_385_0  | 51  | 0.8754 | 1          | 0.8754 | 0 | 0 | 0 | 1 Ref      |
| MW302330 | Unassigned | Unassigned | Unassigned | 654_0  | Clustered           | 4 VC_654_0   | 4   | 0.2897 | 0.99998263 | 0.2897 | 0 | 0 | 0 | 1 Ref      |
| MW311372 | Unassigned | Unassigned | Unassigned | 329_11 | Clustered           | 15 VC_329_11 | 15  | 0.0791 | 1          | 0.0791 | 0 | 0 | 0 | 0.9333 Ref |
| MW314138 | Unassigned | Unassigned | Unassigned | 830_0  | Clustered           | 6 VC_830_0   | 6   | 0.6536 | 1          | 0.6536 | 0 | 0 | 0 | 1 Ref      |
| MW314845 | Unassigned | Unassigned | Unassigned | 556_0  | Clustered           | 21 VC_556_0  | 21  | 0.9912 | 1          | 0.9912 | 0 | 0 | 0 | 1 Ref      |
| MW314846 | Unassigned | Unassigned | Unassigned | 546_1  | Clustered           | 2 VC_546_1   | 2   | 0.0136 | 0.68405151 | 0.0093 | 0 | 0 | 0 | 1 Ref      |
| MW314847 | Unassigned | Unassigned | Unassigned | 1095_0 | Clustered           | 16 VC_1095_0 | 16  | 0.458  | 1          | 0.458  | 0 | 0 | 0 | 1 Ref      |
| MW314848 | Unassigned | Unassigned | Unassigned | 1160_0 | Clustered           | 73 VC_1160_0 | 73  | 0.9835 | 1          | 0.9835 | 0 | 0 | 0 | 1 Ref      |
| MW314851 | Unassigned | Unassigned | Unassigned | 1092_0 | Clustered           | 12 VC_1092_0 | 12  | 0.8894 | 1          | 0.8894 | 0 | 0 | 0 | 1 Ref      |
| MW314852 | Unassigned | Unassigned | Unassigned | 555_0  | Clustered           | 13 VC_555_0  | 13  | 0.7516 | 1          | 0.7516 | 0 | 0 | 0 | 1 Ref      |
| MW314853 | Unassigned | Unassigned | Unassigned | 1092_0 | Clustered           | 12 VC_1092_0 | 12  | 0.8894 | 1          | 0.8894 | 0 | 0 | 0 | 1 Ref      |
| MW314854 | Unassigned | Unassigned | Unassigned | 516_0  | Clustered           | 3 VC_516_0   | 3   | 0.4664 | 0.99856798 | 0.4658 | 0 | 0 | 0 | 1 Ref      |
| MW314855 | Unassigned | Unassigned | Unassigned | 550_0  | Clustered           | 12 VC_550_0  | 12  | 0.802  | 1          | 0.802  | 0 | 0 | 0 | 1 Ref      |
| MW314856 | Unassigned | Unassigned | Unassigned | 550_0  | Clustered           | 12 VC_550_0  | 12  | 0.802  | 1          | 0.802  | 0 | 0 | 0 | 1 Ref      |
| MW314857 | Unassigned | Unassigned | Unassigned | 1092_0 | Clustered           | 12 VC_1092_0 | 12  | 0.8894 | 1          | 0.8894 | 0 | 0 | 0 | 1 Ref      |
| MW314858 | Unassigned | Unassigned | Unassigned | 550_0  | Clustered           | 12 VC_550_0  | 12  | 0.802  | 1          | 0.802  | 0 | 0 | 0 | 1 Ref      |
| MW314859 | Unassigned | Unassigned | Unassigned | 240_0  | Clustered           | 4 VC_240_0   | 4   | 0.7811 | 0.99998265 | 0.7811 | 0 | 0 | 0 | 1 Ref      |
| MW316731 | Unassigned | Unassigned | Unassigned | 702_0  | Clustered           | 5 VC_702_0   | 5   | 0.7794 | 0.99999988 | 0.7794 | 0 | 0 | 0 | 1 Ref      |
| MW316732 | Unassigned | Unassigned | Unassigned | 702_0  | Clustered           | 5 VC_702_0   | 5   | 0.7794 | 0.99999988 | 0.7794 | 0 | 0 | 0 | 1 Ref      |



|          |            |            |            |         |                     |              |     |        |            |        |   |   |   |            |
|----------|------------|------------|------------|---------|---------------------|--------------|-----|--------|------------|--------|---|---|---|------------|
| MW316733 | Unassigned | Unassigned | Unassigned | 702_0   | Clustered           | 5 VC_702_0   | 5   | 0.7794 | 0.99999988 | 0.7794 | 0 | 0 | 0 | 1 Ref      |
| MW321605 | Unassigned | Unassigned | Unassigned | 329_11  | Clustered           | 15 VC_329_11 | 15  | 0.0791 | 1          | 0.0791 | 0 | 0 | 0 | 0.9333 Ref |
| MW321655 | Unassigned | Unassigned | Unassigned | 1344_0  | Clustered           | 78 VC_1344_0 | 78  | 0.9732 | 1          | 0.9732 | 0 | 0 | 0 | 1 Ref      |
| MW329986 | Unassigned | Unassigned | Unassigned | 472_0   | Clustered           | 47 VC_472_0  | 47  | 0.9025 | 1          | 0.9025 | 0 | 0 | 0 | 1 Ref      |
| MW331437 | Unassigned | Unassigned | Unassigned | 638_0   | Clustered           | 45 VC_638_0  | 45  | 0.7741 | 1          | 0.7741 | 0 | 0 | 0 | 1 Ref      |
| MW331544 | Unassigned | Unassigned | Unassigned | 837_0   | Clustered           | 29 VC_837_0  | 29  | 0.9955 | 1          | 0.9955 | 0 | 0 | 0 | 1 Ref      |
| MW341595 | Unassigned | Unassigned | Unassigned | 283_144 | Clustered/Singleton | 1 VC_283_144 | 1   | 0      | 1          | 0      | 0 | 0 | 0 | 1 Ref      |
| MW343794 | Unassigned | Unassigned | Unassigned | 812_2   | Clustered           | 2 VC_812_2   | 2   | 0.0668 | 0.95518138 | 0.0639 | 0 | 0 | 0 | 1 Ref      |
| MW344054 | Unassigned | Unassigned | Unassigned | 971_1   | Clustered           | 24 VC_971_1  | 24  | 0.7393 | 1          | 0.7393 | 0 | 0 | 0 | 0.8913 Ref |
| MW344055 | Unassigned | Unassigned | Unassigned | 971_1   | Clustered           | 24 VC_971_1  | 24  | 0.7393 | 1          | 0.7393 | 0 | 0 | 0 | 0.8913 Ref |
| MW344056 | Unassigned | Unassigned | Unassigned | 971_1   | Clustered           | 24 VC_971_1  | 24  | 0.7393 | 1          | 0.7393 | 0 | 0 | 0 | 0.8913 Ref |
| MW344764 | Unassigned | Unassigned | Unassigned | 834_0   | Clustered           | 7 VC_834_0   | 7   | 0.9845 | 0.94276893 | 0.9282 | 0 | 0 | 0 | 1 Ref      |
| MW344765 | Unassigned | Unassigned | Unassigned | 351_0   | Clustered           | 3 VC_351_0   | 3   | 0.8899 | 0.98155579 | 0.8735 | 0 | 0 | 0 | 1 Ref      |
| MW344766 | Unassigned | Unassigned | Unassigned | 834_0   | Clustered           | 7 VC_834_0   | 7   | 0.9845 | 0.94276893 | 0.9282 | 0 | 0 | 0 | 1 Ref      |
| MW344767 | Unassigned | Unassigned | Unassigned | 961_0   | Clustered           | 3 VC_961_0   | 3   | 0.675  | 0.99054823 | 0.6686 | 0 | 0 | 0 | 1 Ref      |
| MW345241 | Unassigned | Unassigned | Unassigned | 699_0   | Clustered           | 71 VC_699_0  | 71  | 0.9352 | 1          | 0.9352 | 0 | 0 | 0 | 1 Ref      |
| MW345254 | Unassigned | Unassigned | Unassigned | 451_0   | Clustered           | 80 VC_451_0  | 80  | 0.9991 | 1          | 0.9991 | 0 | 0 | 0 | 1 Ref      |
| MW348917 | Unassigned | Unassigned | Unassigned | 818_0   | Clustered           | 20 VC_818_0  | 20  | 0.9601 | 1          | 0.9601 | 0 | 0 | 0 | 1 Ref      |
| MW349128 | Unassigned | Unassigned | Unassigned | 449_0   | Clustered           | 7 VC_449_0   | 7   | 0.6015 | 1          | 0.6015 | 0 | 0 | 0 | 1 Ref      |
| MW349129 | Unassigned | Unassigned | Unassigned | 449_0   | Clustered           | 7 VC_449_0   | 7   | 0.6015 | 1          | 0.6015 | 0 | 0 | 0 | 1 Ref      |
| MW349133 | Unassigned | Unassigned | Unassigned | 700_0   | Clustered           | 10 VC_700_0  | 10  | 0.8076 | 1          | 0.8076 | 0 | 0 | 0 | 1 Ref      |
| MW349138 | Unassigned | Unassigned | Unassigned | 792_0   | Clustered           | 35 VC_792_0  | 35  | 0.9828 | 1          | 0.9828 | 0 | 0 | 0 | 1 Ref      |
| MW353166 | Unassigned | Unassigned | Unassigned | 1453_0  | Clustered           | 7 VC_1453_0  | 7   | 0.912  | 0.99951341 | 0.9115 | 0 | 0 | 0 | 1 Ref      |
| MW353167 | Unassigned | Unassigned | Unassigned | 1453_0  | Clustered           | 7 VC_1453_0  | 7   | 0.912  | 0.99951341 | 0.9115 | 0 | 0 | 0 | 1 Ref      |
| MW353168 | Unassigned | Unassigned | Unassigned | 1453_0  | Clustered           | 7 VC_1453_0  | 7   | 0.912  | 0.99951341 | 0.9115 | 0 | 0 | 0 | 1 Ref      |
| MW353169 | Unassigned | Unassigned | Unassigned | 1453_0  | Clustered           | 7 VC_1453_0  | 7   | 0.912  | 0.99951341 | 0.9115 | 0 | 0 | 0 | 1 Ref      |
| MW353170 | Unassigned | Unassigned | Unassigned | 1453_0  | Clustered           | 7 VC_1453_0  | 7   | 0.912  | 0.99951341 | 0.9115 | 0 | 0 | 0 | 1 Ref      |
| MW353171 | Unassigned | Unassigned | Unassigned | 1453_0  | Clustered           | 7 VC_1453_0  | 7   | 0.912  | 0.99951341 | 0.9115 | 0 | 0 | 0 | 1 Ref      |
| MW353172 | Unassigned | Unassigned | Unassigned | 1453_0  | Clustered           | 7 VC_1453_0  | 7   | 0.912  | 0.99951341 | 0.9115 | 0 | 0 | 0 | 1 Ref      |
| MW353175 | Unassigned | Unassigned | Unassigned | 505_0   | Clustered           | 3 VC_505_0   | 3   | 0.8802 | 0.96819872 | 0.8523 | 0 | 0 | 0 | 1 Ref      |
| MW353176 | Unassigned | Unassigned | Unassigned | 505_0   | Clustered           | 3 VC_505_0   | 3   | 0.8802 | 0.96819872 | 0.8523 | 0 | 0 | 0 | 1 Ref      |
| MW353177 | Unassigned | Unassigned | Unassigned | 505_0   | Clustered           | 3 VC_505_0   | 3   | 0.8802 | 0.96819872 | 0.8523 | 0 | 0 | 0 | 1 Ref      |
| MW353181 | Unassigned | Unassigned | Unassigned | 684_0   | Clustered           | 5 VC_684_0   | 5   | 0.3915 | 0.99999995 | 0.3915 | 0 | 0 | 0 | 1 Ref      |
| MW354667 | Unassigned | Unassigned | Unassigned | 85_3    | Clustered           | 19 VC_85_3   | 19  | 0.3671 | 1          | 0.3671 | 0 | 0 | 0 | 0.807 Ref  |
| MW354668 | Unassigned | Unassigned | Unassigned | 817_0   | Clustered           | 14 VC_817_0  | 14  | 0.6342 | 1          | 0.6342 | 0 | 0 | 0 | 1 Ref      |
| MW354669 | Unassigned | Unassigned | Unassigned | 1358_0  | Clustered           | 5 VC_1358_0  | 5   | 1      | 1          | 1      | 0 | 0 | 0 | 1 Ref      |
| MW354670 | Unassigned | Unassigned | Unassigned | 817_0   | Clustered           | 14 VC_817_0  | 14  | 0.6342 | 1          | 0.6342 | 0 | 0 | 0 | 1 Ref      |
| MW354676 | Unassigned | Unassigned | Unassigned | 1358_0  | Clustered           | 5 VC_1358_0  | 5   | 1      | 1          | 1      | 0 | 0 | 0 | 1 Ref      |
| MW354677 | Unassigned | Unassigned | Unassigned | 1358_0  | Clustered           | 5 VC_1358_0  | 5   | 1      | 1          | 1      | 0 | 0 | 0 | 1 Ref      |
| MW354678 | Unassigned | Unassigned | Unassigned | 1358_0  | Clustered           | 5 VC_1358_0  | 5   | 1      | 1          | 1      | 0 | 0 | 0 | 1 Ref      |
| MW355449 | Unassigned | Unassigned | Unassigned | 592_0   | Clustered           | 50 VC_592_0  | 50  | 0.7314 | 1          | 0.7314 | 0 | 0 | 0 | 1 Ref      |
| MW355450 | Unassigned | Unassigned | Unassigned | 133_31  | Clustered           | 6 VC_133_31  | 6   | 0.0263 | 0.99999694 | 0.0263 | 0 | 0 | 0 | 1 Ref      |
| MW355451 | Unassigned | Unassigned | Unassigned | 637_1   | Clustered           | 27 VC_637_1  | 27  | 0.2578 | 1          | 0.2578 | 0 | 0 | 0 | 0.9858 Ref |
| MW355452 | Unassigned | Unassigned | Unassigned | 637_1   | Clustered           | 27 VC_637_1  | 27  | 0.2578 | 1          | 0.2578 | 0 | 0 | 0 | 0.9858 Ref |
| MW355453 | Unassigned | Unassigned | Unassigned | 637_1   | Clustered           | 27 VC_637_1  | 27  | 0.2578 | 1          | 0.2578 | 0 | 0 | 0 | 0.9858 Ref |
| MW355454 | Unassigned | Unassigned | Unassigned | 637_1   | Clustered           | 27 VC_637_1  | 27  | 0.2578 | 1          | 0.2578 | 0 | 0 | 0 | 0.9858 Ref |
| MW355455 | Unassigned | Unassigned | Unassigned | 637_1   | Clustered           | 27 VC_637_1  | 27  | 0.2578 | 1          | 0.2578 | 0 | 0 | 0 | 0.9858 Ref |
| MW355456 | Unassigned | Unassigned | Unassigned | 637_1   | Clustered           | 27 VC_637_1  | 27  | 0.2578 | 1          | 0.2578 | 0 | 0 | 0 | 0.9858 Ref |
| MW355457 | Unassigned | Unassigned | Unassigned | 637_1   | Clustered           | 27 VC_637_1  | 27  | 0.2578 | 1          | 0.2578 | 0 | 0 | 0 | 0.9858 Ref |
| MW355458 | Unassigned | Unassigned | Unassigned | 637_1   | Clustered           | 27 VC_637_1  | 27  | 0.2578 | 1          | 0.2578 | 0 | 0 | 0 | 0.9858 Ref |
| MW355459 | Unassigned | Unassigned | Unassigned | 637_1   | Clustered           | 27 VC_637_1  | 27  | 0.2578 | 1          | 0.2578 | 0 | 0 | 0 | 0.9858 Ref |
| MW355460 | Unassigned | Unassigned | Unassigned | 592_0   | Clustered           | 50 VC_592_0  | 50  | 0.7314 | 1          | 0.7314 | 0 | 0 | 0 | 1 Ref      |
| MW355461 | Unassigned | Unassigned | Unassigned | 637_1   | Clustered           | 27 VC_637_1  | 27  | 0.2578 | 1          | 0.2578 | 0 | 0 | 0 | 0.9858 Ref |
| MW355462 | Unassigned | Unassigned | Unassigned | 637_1   | Clustered           | 27 VC_637_1  | 27  | 0.2578 | 1          | 0.2578 | 0 | 0 | 0 | 0.9858 Ref |
| MW355463 | Unassigned | Unassigned | Unassigned | 637_0   | Clustered           | 115 VC_637_0 | 115 | 0.731  | 1          | 0.731  | 0 | 0 | 0 | 0.8764 Ref |
| MW355464 | Unassigned | Unassigned | Unassigned | 637_0   | Clustered           | 115 VC_637_0 | 115 | 0.731  | 1          | 0.731  | 0 | 0 | 0 | 0.8764 Ref |
| MW355465 | Unassigned | Unassigned | Unassigned | 637_0   | Clustered           | 115 VC_637_0 | 115 | 0.731  | 1          | 0.731  | 0 | 0 | 0 | 0.8764 Ref |
| MW355466 | Unassigned | Unassigned | Unassigned | 637_1   | Clustered           | 27 VC_637_1  | 27  | 0.2578 | 1          | 0.2578 | 0 | 0 | 0 | 0.9858 Ref |
| MW355467 | Unassigned | Unassigned | Unassigned | 592_0   | Clustered           | 50 VC_592_0  | 50  | 0.7314 | 1          | 0.7314 | 0 | 0 | 0 | 1 Ref      |
| MW355468 | Unassigned | Unassigned | Unassigned | 637_1   | Clustered           | 27 VC_637_1  | 27  | 0.2578 | 1          | 0.2578 | 0 | 0 | 0 | 0.9858 Ref |
| MW355469 | Unassigned | Unassigned | Unassigned | 637_1   | Clustered           | 27 VC_637_1  | 27  | 0.2578 | 1          | 0.2578 | 0 | 0 | 0 | 0.9858 Ref |
| MW355470 | Unassigned | Unassigned | Unassigned | 592_0   | Clustered           | 50 VC_592_0  | 50  | 0.7314 | 1          | 0.7314 | 0 | 0 | 0 | 1 Ref      |
| MW355471 | Unassigned | Unassigned | Unassigned | 637_1   | Clustered           | 27 VC_637_1  | 27  | 0.2578 | 1          | 0.2578 | 0 | 0 | 0 | 0.9858 Ref |
| MW355472 | Unassigned | Unassigned | Unassigned | 637_1   | Clustered           | 27 VC_637_1  | 27  | 0.2578 | 1          | 0.2578 | 0 | 0 | 0 | 0.9858 Ref |
| MW355473 | Unassigned | Unassigned | Unassigned | 637_1   | Clustered           | 27 VC_637_1  | 27  | 0.2578 | 1          | 0.2578 | 0 | 0 | 0 | 0.9858 Ref |
| MW355474 | Unassigned | Unassigned | Unassigned | 592_0   | Clustered           | 50 VC_592_0  | 50  | 0.7314 | 1          | 0.7314 | 0 | 0 | 0 | 1 Ref      |
| MW355475 | Unassigned | Unassigned | Unassigned | 133_31  | Clustered           | 6 VC_133_31  | 6   | 0.0263 | 0.99999694 | 0.0263 | 0 | 0 | 0 | 1 Ref      |
| MW355476 | Unassigned | Unassigned | Unassigned | 592_0   | Clustered           | 50 VC_592_0  | 50  | 0.7314 | 1          | 0.7314 | 0 | 0 | 0 | 1 Ref      |
| MW355477 | Unassigned | Unassigned | Unassigned | 133_31  | Clustered           | 6 VC_133_31  | 6   | 0.0263 | 0.99999694 | 0.0263 | 0 | 0 | 0 | 1 Ref      |
| MW355478 | Unassigned | Unassigned | Unassigned | 133_28  | Clustered           | 3 VC_133_28  | 3   | 0.0105 | 0.97661637 | 0.0103 | 0 | 0 | 0 | 0.6667 Ref |
| MW355479 | Unassigned | Unassigned | Unassigned | 592_0   | Clustered           | 50 VC_592_0  | 50  | 0.7314 | 1          | 0.7314 | 0 | 0 | 0 | 1 Ref      |
| MW355480 | Unassigned | Unassigned | Unassigned | 28_1    | Clustered           | 53 VC_28_1   | 53  | 0.7164 | 1          | 0.7164 | 0 | 0 | 0 | 0.9325 Ref |
| MW357609 | Unassigned | Unassigned | Unassigned | 191_19  | Clustered           | 12 VC_191_19 | 12  | 0.0655 | 1          | 0.0655 | 0 | 0 | 0 | 0.8636 Ref |
| MW358927 | Unassigned | Unassigned | Unassigned | 288_0   | Clustered           | 3 VC_288_0   | 3   | 0.042  | 0.99856109 | 0.042  | 0 | 0 | 0 | 1 Ref      |
| MW358928 | Unassigned | Unassigned | Unassigned | 396_0   | Clustered           | 2 VC_396_0   | 2   | 0.0714 | 0.95759359 | 0.0684 | 0 | 0 | 0 | 1 Ref      |
| MW358930 | Unassigned | Unassigned | Unassigned | 112_0   | Clustered           | 8 VC_112_0   | 8   | 0.2537 | 1          | 0.2537 | 0 | 0 | 0 | 1 Ref      |
| MW358931 | Unassigned | Unassigned | Unassigned | 390_0   | Clustered           | 4 VC_390_0   | 4   | 0.0468 | 0.9999882  | 0.0468 | 0 | 0 | 0 | 1 Ref      |
| MW362867 | Unassigned | Unassigned | Unassigned | 329_11  | Clustered           | 15 VC_329_11 | 15  | 0.0791 | 1          | 0.0791 | 0 | 0 | 0 | 0.9333 Ref |
| MW363798 | Unassigned | Unassigned | Unassigned | 153_0   | Clustered           | 25 VC_153_0  | 25  | 0.7729 | 1          | 0.7729 | 0 | 0 | 0 | 1 Ref      |
| MW363799 | Unassigned | Unassigned | Unassigned | 96_0    | Clustered           | 30 VC_96_0   | 30  | 0.718  | 1          | 0.718  | 0 | 0 | 0 | 1 Ref      |
| MW365946 | Unassigned | Unassigned | Unassigned | 1171_0  | Clustered           | 21 VC_1171_0 | 21  | 0.7125 | 1          | 0.7125 | 0 | 0 | 0 | 1 Ref      |



|          |            |            |            |        |                     |              |    |        |            |        |   |   |   |            |
|----------|------------|------------|------------|--------|---------------------|--------------|----|--------|------------|--------|---|---|---|------------|
| MW365947 | Unassigned | Unassigned | Unassigned | 1360_0 | Clustered           | 31 VC_1360_0 | 31 | 0.8837 | 1          | 0.8837 | 0 | 0 | 0 | 1 Ref      |
| MW365948 | Unassigned | Unassigned | Unassigned | 1360_0 | Clustered           | 31 VC_1360_0 | 31 | 0.8837 | 1          | 0.8837 | 0 | 0 | 0 | 1 Ref      |
| MW365949 | Unassigned | Unassigned | Unassigned | 1171_0 | Clustered           | 21 VC_1171_0 | 21 | 0.7125 | 1          | 0.7125 | 0 | 0 | 0 | 1 Ref      |
| MW365950 | Unassigned | Unassigned | Unassigned | 1171_0 | Clustered           | 21 VC_1171_0 | 21 | 0.7125 | 1          | 0.7125 | 0 | 0 | 0 | 1 Ref      |
| MW365951 | Unassigned | Unassigned | Unassigned | 982_0  | Clustered           | 62 VC_982_0  | 62 | 0.8646 | 1          | 0.8646 | 0 | 0 | 0 | 0.743 Ref  |
| MW365952 | Unassigned | Unassigned | Unassigned | 1072_2 | Clustered           | 5 VC_1072_2  | 5  | 0.1003 | 0.99999315 | 0.1003 | 0 | 0 | 0 | 1 Ref      |
| MW365953 | Unassigned | Unassigned | Unassigned | 982_0  | Clustered           | 62 VC_982_0  | 62 | 0.8646 | 1          | 0.8646 | 0 | 0 | 0 | 0.743 Ref  |
| MW366783 | Unassigned | Unassigned | Unassigned | 699_0  | Clustered           | 71 VC_699_0  | 71 | 0.9352 | 1          | 0.9352 | 0 | 0 | 0 | 1 Ref      |
| MW366784 | Unassigned | Unassigned | Unassigned | 699_0  | Clustered           | 71 VC_699_0  | 71 | 0.9352 | 1          | 0.9352 | 0 | 0 | 0 | 1 Ref      |
| MW366843 | Unassigned | Unassigned | Unassigned | 67_0   | Clustered           | 2 VC_67_0    | 2  | 0.014  | 0.69357611 | 0.0097 | 0 | 0 | 0 | 1 Ref      |
| MW367417 | Unassigned | Unassigned | Unassigned | 849_8  | Clustered/Singleton | 1 VC_849_8   | 1  | 0      | 1          | 0      | 0 | 0 | 0 | 1 Ref      |
| MW367418 | Unassigned | Unassigned | Unassigned | 386_0  | Clustered           | 49 VC_386_0  | 49 | 0.7941 | 1          | 0.7941 | 0 | 0 | 0 | 1 Ref      |
| MW367898 | Unassigned | Unassigned | Unassigned | 288_3  | Clustered           | 3 VC_288_3   | 3  | 0.0452 | 0.99844025 | 0.0452 | 0 | 0 | 0 | 1 Ref      |
| MW380983 | Unassigned | Unassigned | Unassigned | 793_0  | Clustered           | 12 VC_793_0  | 12 | 0.8531 | 1          | 0.8531 | 0 | 0 | 0 | 1 Ref      |
| MW380984 | Unassigned | Unassigned | Unassigned | 793_0  | Clustered           | 12 VC_793_0  | 12 | 0.8531 | 1          | 0.8531 | 0 | 0 | 0 | 1 Ref      |
| MW380985 | Unassigned | Unassigned | Unassigned | 793_0  | Clustered           | 12 VC_793_0  | 12 | 0.8531 | 1          | 0.8531 | 0 | 0 | 0 | 1 Ref      |
| MW384823 | Unassigned | Unassigned | Unassigned | 959_1  | Clustered           | 8 VC_959_1   | 8  | 0.0878 | 0.98435099 | 0.0864 | 0 | 0 | 0 | 1 Ref      |
| MW385300 | Unassigned | Unassigned | Unassigned | 288_0  | Clustered           | 3 VC_288_0   | 3  | 0.042  | 0.99856109 | 0.042  | 0 | 0 | 0 | 1 Ref      |
| MW387018 | Unassigned | Unassigned | Unassigned | 626_0  | Clustered           | 23 VC_626_0  | 23 | 0.66   | 1          | 0.66   | 0 | 0 | 0 | 0.8379 Ref |
| MW388001 | Unassigned | Unassigned | Unassigned | 492_2  | Clustered           | 8 VC_492_2   | 8  | 0.1221 | 0.98786574 | 0.1206 | 0 | 0 | 0 | 1 Ref      |
| MW388002 | Unassigned | Unassigned | Unassigned | 492_2  | Clustered           | 8 VC_492_2   | 8  | 0.1221 | 0.98786574 | 0.1206 | 0 | 0 | 0 | 1 Ref      |
| MW388003 | Unassigned | Unassigned | Unassigned | 492_2  | Clustered           | 8 VC_492_2   | 8  | 0.1221 | 0.98786574 | 0.1206 | 0 | 0 | 0 | 1 Ref      |
| MW388004 | Unassigned | Unassigned | Unassigned | 492_2  | Clustered           | 8 VC_492_2   | 8  | 0.1221 | 0.98786574 | 0.1206 | 0 | 0 | 0 | 1 Ref      |
| MW388005 | Unassigned | Unassigned | Unassigned | 133_15 | Clustered           | 2 VC_133_15  | 2  | 0.0051 | 0.84786437 | 0.0044 | 0 | 0 | 0 | 1 Ref      |
| MW390886 | Unassigned | Unassigned | Unassigned | 179_0  | Clustered           | 53 VC_179_0  | 53 | 0.9137 | 1          | 0.9137 | 0 | 0 | 0 | 1 Ref      |
| MW392801 | Unassigned | Unassigned | Unassigned | 1006_0 | Clustered           | 8 VC_1006_0  | 8  | 0.7407 | 1          | 0.7407 | 0 | 0 | 0 | 1 Ref      |
| MW392802 | Unassigned | Unassigned | Unassigned | 1006_0 | Clustered           | 8 VC_1006_0  | 8  | 0.7407 | 1          | 0.7407 | 0 | 0 | 0 | 1 Ref      |
| MW392803 | Unassigned | Unassigned | Unassigned | 884_1  | Clustered           | 8 VC_884_1   | 8  | 0.1102 | 0.9989323  | 0.1101 | 0 | 0 | 0 | 0.75 Ref   |
| MW393850 | Unassigned | Unassigned | Unassigned | 671_0  | Clustered           | 5 VC_671_0   | 5  | 0.5289 | 0.99999996 | 0.5289 | 0 | 0 | 0 | 1 Ref      |
| MW394389 | Unassigned | Unassigned | Unassigned | 452_0  | Clustered           | 66 VC_452_0  | 66 | 0.9248 | 1          | 0.9248 | 0 | 0 | 0 | 1 Ref      |
| MW394391 | Unassigned | Unassigned | Unassigned | 488_0  | Clustered           | 8 VC_488_0   | 8  | 0.2938 | 1          | 0.2938 | 0 | 0 | 0 | 1 Ref      |
| MW398869 | Unassigned | Unassigned | Unassigned | 971_1  | Clustered           | 24 VC_971_1  | 24 | 0.7393 | 1          | 0.7393 | 0 | 0 | 0 | 0.8913 Ref |
| MW406974 | Unassigned | Unassigned | Unassigned | 79_1   | Clustered           | 2 VC_79_1    | 2  | 0.006  | 0.95748743 | 0.0057 | 0 | 0 | 0 | 1 Ref      |
| MW406975 | Unassigned | Unassigned | Unassigned | 423_0  | Clustered           | 45 VC_423_0  | 45 | 0.9484 | 1          | 0.9484 | 0 | 0 | 0 | 1 Ref      |
| MW406976 | Unassigned | Unassigned | Unassigned | 423_0  | Clustered           | 45 VC_423_0  | 45 | 0.9484 | 1          | 0.9484 | 0 | 0 | 0 | 1 Ref      |
| MW411578 | Unassigned | Unassigned | Unassigned | 191_9  | Clustered           | 5 VC_191_9   | 5  | 0.0228 | 0.99999662 | 0.0228 | 0 | 0 | 0 | 0.7 Ref    |
| MW411580 | Unassigned | Unassigned | Unassigned | 904_2  | Clustered           | 7 VC_904_2   | 7  | 0.2857 | 1          | 0.2857 | 0 | 0 | 0 | 1 Ref      |
| MW413353 | Unassigned | Unassigned | Unassigned | 428_0  | Clustered           | 33 VC_428_0  | 33 | 0.9915 | 1          | 0.9915 | 0 | 0 | 0 | 1 Ref      |
| MW416012 | Unassigned | Unassigned | Unassigned | 451_0  | Clustered           | 80 VC_451_0  | 80 | 0.9991 | 1          | 0.9991 | 0 | 0 | 0 | 1 Ref      |
| MW417503 | Unassigned | Unassigned | Unassigned | 937_0  | Clustered           | 40 VC_937_0  | 40 | 0.6809 | 1          | 0.6809 | 0 | 0 | 0 | 0.9359 Ref |
| MW419084 | Unassigned | Unassigned | Unassigned | 85_1   | Clustered           | 4 VC_85_1    | 4  | 0.0507 | 0.99996692 | 0.0507 | 0 | 0 | 0 | 1 Ref      |
| MW419085 | Unassigned | Unassigned | Unassigned | 85_1   | Clustered           | 4 VC_85_1    | 4  | 0.0507 | 0.99996692 | 0.0507 | 0 | 0 | 0 | 1 Ref      |
| MW419086 | Unassigned | Unassigned | Unassigned | 85_1   | Clustered           | 4 VC_85_1    | 4  | 0.0507 | 0.99996692 | 0.0507 | 0 | 0 | 0 | 1 Ref      |
| MW419087 | Unassigned | Unassigned | Unassigned | 85_1   | Clustered           | 4 VC_85_1    | 4  | 0.0507 | 0.99996692 | 0.0507 | 0 | 0 | 0 | 1 Ref      |
| MW419910 | Unassigned | Unassigned | Unassigned | 836_0  | Clustered           | 9 VC_836_0   | 9  | 0.7733 | 1          | 0.7733 | 0 | 0 | 0 | 1 Ref      |
| MW421576 | Unassigned | Unassigned | Unassigned | 1023_0 | Clustered           | 8 VC_1023_0  | 8  | 0.8574 | 1          | 0.8574 | 0 | 0 | 0 | 1 Ref      |
| MW421577 | Unassigned | Unassigned | Unassigned | 1157_0 | Clustered           | 24 VC_1157_0 | 24 | 1      | 1          | 1      | 0 | 0 | 0 | 1 Ref      |
| MW421578 | Unassigned | Unassigned | Unassigned | 1157_0 | Clustered           | 24 VC_1157_0 | 24 | 1      | 1          | 1      | 0 | 0 | 0 | 1 Ref      |
| MW421579 | Unassigned | Unassigned | Unassigned | 1157_0 | Clustered           | 24 VC_1157_0 | 24 | 1      | 1          | 1      | 0 | 0 | 0 | 1 Ref      |
| MW421580 | Unassigned | Unassigned | Unassigned | 1157_0 | Clustered           | 24 VC_1157_0 | 24 | 1      | 1          | 1      | 0 | 0 | 0 | 1 Ref      |
| MW421581 | Unassigned | Unassigned | Unassigned | 1021_0 | Clustered           | 10 VC_1021_0 | 10 | 0.8876 | 1          | 0.8876 | 0 | 0 | 0 | 1 Ref      |
| MW421582 | Unassigned | Unassigned | Unassigned | 1021_0 | Clustered           | 10 VC_1021_0 | 10 | 0.8876 | 1          | 0.8876 | 0 | 0 | 0 | 1 Ref      |
| MW421583 | Unassigned | Unassigned | Unassigned | 1021_0 | Clustered           | 10 VC_1021_0 | 10 | 0.8876 | 1          | 0.8876 | 0 | 0 | 0 | 1 Ref      |
| MW421584 | Unassigned | Unassigned | Unassigned | 1021_0 | Clustered           | 10 VC_1021_0 | 10 | 0.8876 | 1          | 0.8876 | 0 | 0 | 0 | 1 Ref      |
| MW423797 | Unassigned | Unassigned | Unassigned | 329_16 | Clustered           | 4 VC_329_16  | 4  | 0.0158 | 0.99999807 | 0.0158 | 0 | 0 | 0 | 1 Ref      |
| MW423798 | Unassigned | Unassigned | Unassigned | 191_33 | Clustered/Singleton | 1 VC_191_33  | 1  | 0      | 1          | 0      | 0 | 0 | 0 | 1 Ref      |
| MW427215 | Unassigned | Unassigned | Unassigned | 461_0  | Clustered           | 96 VC_461_0  | 96 | 0.9307 | 1          | 0.9307 | 0 | 0 | 0 | 0.9575 Ref |
| MW430345 | Unassigned | Unassigned | Unassigned | 151_0  | Clustered           | 6 VC_151_0   | 6  | 0.0735 | 1          | 0.0735 | 0 | 0 | 0 | 1 Ref      |
| MW435853 | Unassigned | Unassigned | Unassigned | 1072_3 | Clustered           | 6 VC_1072_3  | 6  | 0.1304 | 0.99999994 | 0.1304 | 0 | 0 | 0 | 0.8667 Ref |
| MW435854 | Unassigned | Unassigned | Unassigned | 238_0  | Clustered           | 17 VC_238_0  | 17 | 0.6109 | 1          | 0.6109 | 0 | 0 | 0 | 1 Ref      |
| MW435855 | Unassigned | Unassigned | Unassigned | 887_0  | Clustered           | 18 VC_887_0  | 18 | 0.3663 | 1          | 0.3663 | 0 | 0 | 0 | 1 Ref      |
| MW435856 | Unassigned | Unassigned | Unassigned | 982_0  | Clustered           | 62 VC_982_0  | 62 | 0.8646 | 1          | 0.8646 | 0 | 0 | 0 | 0.743 Ref  |
| MW435857 | Unassigned | Unassigned | Unassigned | 372_0  | Clustered           | 24 VC_372_0  | 24 | 0.5539 | 1          | 0.5539 | 0 | 0 | 0 | 1 Ref      |
| MW435858 | Unassigned | Unassigned | Unassigned | 325_32 | Clustered/Singleton | 1 VC_325_32  | 1  | 0      | 1          | 0      | 0 | 0 | 0 | 1 Ref      |
| MW435859 | Unassigned | Unassigned | Unassigned | 1240_0 | Clustered           | 82 VC_1240_0 | 82 | 0.7945 | 1          | 0.7945 | 0 | 0 | 0 | 1 Ref      |
| MW442825 | Unassigned | Unassigned | Unassigned | 1157_0 | Clustered           | 24 VC_1157_0 | 24 | 1      | 1          | 1      | 0 | 0 | 0 | 1 Ref      |
| MW442826 | Unassigned | Unassigned | Unassigned | 1157_0 | Clustered           | 24 VC_1157_0 | 24 | 1      | 1          | 1      | 0 | 0 | 0 | 1 Ref      |
| MW442827 | Unassigned | Unassigned | Unassigned | 1157_0 | Clustered           | 24 VC_1157_0 | 24 | 1      | 1          | 1      | 0 | 0 | 0 | 1 Ref      |
| MW442828 | Unassigned | Unassigned | Unassigned | 1157_0 | Clustered           | 24 VC_1157_0 | 24 | 1      | 1          | 1      | 0 | 0 | 0 | 1 Ref      |
| MW442829 | Unassigned | Unassigned | Unassigned | 1157_0 | Clustered           | 24 VC_1157_0 | 24 | 1      | 1          | 1      | 0 | 0 | 0 | 1 Ref      |
| MW442830 | Unassigned | Unassigned | Unassigned | 1157_0 | Clustered           | 24 VC_1157_0 | 24 | 1      | 1          | 1      | 0 | 0 | 0 | 1 Ref      |
| MW448170 | Unassigned | Unassigned | Unassigned | 668_0  | Clustered           | 25 VC_668_0  | 25 | 0.5539 | 1          | 0.5539 | 0 | 0 | 0 | 0.96 Ref   |
| MW448539 | Unassigned | Unassigned | Unassigned | 1157_0 | Clustered           | 24 VC_1157_0 | 24 | 1      | 1          | 1      | 0 | 0 | 0 | 1 Ref      |
| MW448540 | Unassigned | Unassigned | Unassigned | 1157_0 | Clustered           | 24 VC_1157_0 | 24 | 1      | 1          | 1      | 0 | 0 | 0 | 1 Ref      |
| MW448541 | Unassigned | Unassigned | Unassigned | 1157_0 | Clustered           | 24 VC_1157_0 | 24 | 1      | 1          | 1      | 0 | 0 | 0 | 1 Ref      |
| MW450817 | Unassigned | Unassigned | Unassigned | 310_0  | Clustered           | 33 VC_310_0  | 33 | 0.8771 | 1          | 0.8771 | 0 | 0 | 0 | 1 Ref      |
| MW451246 | Unassigned | Unassigned | Unassigned | 882_0  | Clustered           | 20 VC_882_0  | 20 | 0.9917 | 1          | 0.9917 | 0 | 0 | 0 | 1 Ref      |
| MW451247 | Unassigned | Unassigned | Unassigned | 1027_0 | Clustered           | 20 VC_1027_0 | 20 | 0.7114 | 1          | 0.7114 | 0 | 0 | 0 | 1 Ref      |
| MW451248 | Unassigned | Unassigned | Unassigned | 530_0  | Clustered           | 9 VC_530_0   | 9  | 0.8027 | 1          | 0.8027 | 0 | 0 | 0 | 1 Ref      |
| MW451250 | Unassigned | Unassigned | Unassigned | 845_0  | Clustered           | 3 VC_845_0   | 3  | 0.3348 | 0.99831497 | 0.3343 | 0 | 0 | 0 | 1 Ref      |
| MW451251 | Unassigned | Unassigned | Unassigned | 882_0  | Clustered           | 20 VC_882_0  | 20 | 0.9917 | 1          | 0.9917 | 0 | 0 | 0 | 1 Ref      |



|          |            |            |            |        |                     |              |     |        |            |        |   |   |   |            |
|----------|------------|------------|------------|--------|---------------------|--------------|-----|--------|------------|--------|---|---|---|------------|
| MW452562 | Unassigned | Unassigned | Unassigned | 769_0  | Clustered           | 2 VC_769_0   | 2   | 0.0483 | 0.95514297 | 0.0462 | 0 | 0 | 0 | 1 Ref      |
| MW452941 | Unassigned | Unassigned | Unassigned | 913_0  | Clustered           | 2 VC_913_0   | 2   | 0.1042 | 0.82306775 | 0.0858 | 0 | 0 | 0 | 1 Ref      |
| MW459163 | Unassigned | Unassigned | Unassigned | 699_0  | Clustered           | 71 VC_699_0  | 71  | 0.9352 | 1          | 0.9352 | 0 | 0 | 0 | 1 Ref      |
| MW460245 | Unassigned | Unassigned | Unassigned | 66_2   | Clustered/Singleton | 1 VC_66_2    | 1   | 0      | 1          | 0      | 0 | 0 | 0 | 1 Ref      |
| MW460246 | Unassigned | Unassigned | Unassigned | 536_0  | Clustered           | 3 VC_536_0   | 3   | 0.0878 | 0.9985359  | 0.0877 | 0 | 0 | 0 | 1 Ref      |
| MW460248 | Unassigned | Unassigned | Unassigned | 574_0  | Clustered           | 7 VC_574_0   | 7   | 0.2734 | 1          | 0.2734 | 0 | 0 | 0 | 1 Ref      |
| MW460250 | Unassigned | Unassigned | Unassigned | 149_8  | Clustered           | 66 VC_149_8  | 66  | 0.4565 | 1          | 0.4565 | 0 | 0 | 0 | 0.8182 Ref |
| MW462191 | Unassigned | Unassigned | Unassigned | 466_0  | Clustered           | 3 VC_466_0   | 3   | 0.3264 | 0.99747305 | 0.3255 | 0 | 0 | 0 | 1 Ref      |
| MW462221 | Unassigned | Unassigned | Unassigned | 1454_0 | Clustered           | 2 VC_1454_0  | 2   | 0.6937 | 0.85557782 | 0.5935 | 0 | 0 | 0 | 0 Ref      |
| MW476489 | Unassigned | Unassigned | Unassigned | 307_0  | Clustered           | 2 VC_307_0   | 2   | 0.3835 | 0.95251406 | 0.3653 | 0 | 0 | 0 | 1 Ref      |
| MW477480 | Unassigned | Unassigned | Unassigned | 817_0  | Clustered           | 14 VC_817_0  | 14  | 0.6342 | 1          | 0.6342 | 0 | 0 | 0 | 1 Ref      |
| MW477799 | Unassigned | Unassigned | Unassigned | 461_0  | Clustered           | 96 VC_461_0  | 96  | 0.9307 | 1          | 0.9307 | 0 | 0 | 0 | 0.9575 Ref |
| MW478289 | Unassigned | Unassigned | Unassigned | 417_0  | Clustered           | 5 VC_417_0   | 5   | 0.6629 | 0.9977434  | 0.6614 | 0 | 0 | 0 | 0.8 Ref    |
| MW478292 | Unassigned | Unassigned | Unassigned | 542_0  | Clustered           | 2 VC_542_0   | 2   | 0.3753 | 0.94092208 | 0.3531 | 0 | 0 | 0 | 1 Ref      |
| MW481326 | Unassigned | Unassigned | Unassigned | 329_7  | Clustered           | 18 VC_329_7  | 18  | 0.0938 | 1          | 0.0938 | 0 | 0 | 0 | 0.7778 Ref |
| MW495853 | Unassigned | Unassigned | Unassigned | 412_0  | Clustered           | 39 VC_412_0  | 39  | 0.845  | 1          | 0.845  | 0 | 0 | 0 | 1 Ref      |
| MW505928 | Unassigned | Unassigned | Unassigned | 765_0  | Clustered           | 132 VC_765_0 | 132 | 1      | 1          | 1      | 0 | 0 | 0 | 1 Ref      |
| MW507123 | Unassigned | Unassigned | Unassigned | 325_23 | Clustered           | 17 VC_325_23 | 17  | 0.0716 | 1          | 0.0716 | 0 | 0 | 0 | 0.6397 Ref |
| MW507124 | Unassigned | Unassigned | Unassigned | 1360_0 | Clustered           | 31 VC_1360_0 | 31  | 0.8837 | 1          | 0.8837 | 0 | 0 | 0 | 1 Ref      |
| MW507125 | Unassigned | Unassigned | Unassigned | 1178_0 | Clustered           | 24 VC_1178_0 | 24  | 0.9524 | 1          | 0.9524 | 0 | 0 | 0 | 1 Ref      |
| MW507126 | Unassigned | Unassigned | Unassigned | 1168_0 | Clustered           | 2 VC_1168_0  | 2   | 0.099  | 0.93550199 | 0.0927 | 0 | 0 | 0 | 1 Ref      |
| MW507127 | Unassigned | Unassigned | Unassigned | 1344_0 | Clustered           | 78 VC_1344_0 | 78  | 0.9732 | 1          | 0.9732 | 0 | 0 | 0 | 1 Ref      |
| MW507128 | Unassigned | Unassigned | Unassigned | 514_0  | Clustered           | 75 VC_514_0  | 75  | 0.9402 | 1          | 0.9402 | 0 | 0 | 0 | 1 Ref      |
| MW507129 | Unassigned | Unassigned | Unassigned | 767_0  | Clustered           | 34 VC_767_0  | 34  | 0.9173 | 1          | 0.9173 | 0 | 0 | 0 | 1 Ref      |
| MW507130 | Unassigned | Unassigned | Unassigned | 1175_0 | Clustered           | 22 VC_1175_0 | 22  | 0.4562 | 1          | 0.4562 | 0 | 0 | 0 | 1 Ref      |
| MW507131 | Unassigned | Unassigned | Unassigned | 1166_0 | Clustered           | 20 VC_1166_0 | 20  | 0.99   | 1          | 0.99   | 0 | 0 | 0 | 1 Ref      |
| MW507132 | Unassigned | Unassigned | Unassigned | 868_0  | Clustered           | 25 VC_868_0  | 25  | 0.5791 | 1          | 0.5791 | 0 | 0 | 0 | 1 Ref      |
| MW507133 | Unassigned | Unassigned | Unassigned | 868_0  | Clustered           | 25 VC_868_0  | 25  | 0.5791 | 1          | 0.5791 | 0 | 0 | 0 | 1 Ref      |
| MW507134 | Unassigned | Unassigned | Unassigned | 1071_0 | Clustered           | 20 VC_1071_0 | 20  | 0.3268 | 1          | 0.3268 | 0 | 0 | 0 | 0.9842 Ref |
| MW507135 | Unassigned | Unassigned | Unassigned | 919_0  | Clustered           | 39 VC_919_0  | 39  | 0.9069 | 1          | 0.9069 | 0 | 0 | 0 | 1 Ref      |
| MW507136 | Unassigned | Unassigned | Unassigned | 1071_3 | Clustered           | 16 VC_1071_3 | 16  | 0.2354 | 1          | 0.2354 | 0 | 0 | 0 | 0.9667 Ref |
| MW508890 | Unassigned | Unassigned | Unassigned | 428_0  | Clustered           | 33 VC_428_0  | 33  | 0.9915 | 1          | 0.9915 | 0 | 0 | 0 | 1 Ref      |
| MW512264 | Unassigned | Unassigned | Unassigned | 286_0  | Clustered           | 2 VC_286_0   | 2   | 0.0073 | 0.77462993 | 0.0056 | 0 | 0 | 0 | 1 Ref      |
| MW512571 | Unassigned | Unassigned | Unassigned | 647_0  | Clustered           | 11 VC_647_0  | 11  | 0.598  | 1          | 0.598  | 0 | 0 | 0 | 1 Ref      |
| MW512572 | Unassigned | Unassigned | Unassigned | 647_0  | Clustered           | 11 VC_647_0  | 11  | 0.598  | 1          | 0.598  | 0 | 0 | 0 | 1 Ref      |
| MW512830 | Unassigned | Unassigned | Unassigned | 79_6   | Clustered           | 11 VC_79_6   | 11  | 0.0528 | 1          | 0.0528 | 0 | 0 | 0 | 0.7455 Ref |
| MW512831 | Unassigned | Unassigned | Unassigned | 472_0  | Clustered           | 47 VC_472_0  | 47  | 0.9025 | 1          | 0.9025 | 0 | 0 | 0 | 1 Ref      |
| MW512832 | Unassigned | Unassigned | Unassigned | 749_0  | Clustered           | 40 VC_749_0  | 40  | 0.7517 | 1          | 0.7517 | 0 | 0 | 0 | 1 Ref      |
| MW512833 | Unassigned | Unassigned | Unassigned | 79_0   | Clustered           | 64 VC_79_0   | 64  | 0.4185 | 1          | 0.4185 | 0 | 0 | 0 | 0.7649 Ref |
| MW512834 | Unassigned | Unassigned | Unassigned | 79_6   | Clustered           | 11 VC_79_6   | 11  | 0.0528 | 1          | 0.0528 | 0 | 0 | 0 | 0.7455 Ref |
| MW514246 | Unassigned | Unassigned | Unassigned | 305_0  | Clustered           | 12 VC_305_0  | 12  | 0.5745 | 1          | 0.5745 | 0 | 0 | 0 | 0.8485 Ref |
| MW514247 | Unassigned | Unassigned | Unassigned | 305_0  | Clustered           | 12 VC_305_0  | 12  | 0.5745 | 1          | 0.5745 | 0 | 0 | 0 | 0.8485 Ref |
| MW526259 | Unassigned | Unassigned | Unassigned | 76_0   | Clustered           | 37 VC_76_0   | 37  | 0.9403 | 1          | 0.9403 | 0 | 0 | 0 | 1 Ref      |
| MW526260 | Unassigned | Unassigned | Unassigned | 472_0  | Clustered           | 47 VC_472_0  | 47  | 0.9025 | 1          | 0.9025 | 0 | 0 | 0 | 1 Ref      |
| MW528836 | Unassigned | Unassigned | Unassigned | 149_8  | Clustered           | 66 VC_149_8  | 66  | 0.4565 | 1          | 0.4565 | 0 | 0 | 0 | 0.8182 Ref |
| MW534374 | Unassigned | Unassigned | Unassigned | 866_0  | Clustered           | 4 VC_866_0   | 4   | 0.0795 | 0.99998595 | 0.0795 | 0 | 0 | 0 | 1 Ref      |
| MW534375 | Unassigned | Unassigned | Unassigned | 557_3  | Clustered/Singleton | 1 VC_557_3   | 1   | 0      | 1          | 0      | 0 | 0 | 0 | 1 Ref      |
| MW534376 | Unassigned | Unassigned | Unassigned | 954_0  | Clustered           | 13 VC_954_0  | 13  | 0.863  | 1          | 0.863  | 0 | 0 | 0 | 1 Ref      |
| MW534377 | Unassigned | Unassigned | Unassigned | 371_1  | Clustered           | 11 VC_371_1  | 11  | 0.0379 | 1          | 0.0379 | 0 | 0 | 0 | 0.8545 Ref |
| MW534378 | Unassigned | Unassigned | Unassigned | 685_0  | Clustered           | 16 VC_685_0  | 16  | 0.2972 | 1          | 0.2972 | 0 | 0 | 0 | 0.9167 Ref |
| MW534379 | Unassigned | Unassigned | Unassigned | 371_16 | Clustered           | 42 VC_371_16 | 42  | 0.1341 | 1          | 0.1341 | 0 | 0 | 0 | 0.7282 Ref |
| MW534380 | Unassigned | Unassigned | Unassigned | 371_16 | Clustered           | 42 VC_371_16 | 42  | 0.1341 | 1          | 0.1341 | 0 | 0 | 0 | 0.7282 Ref |
| MW534381 | Unassigned | Unassigned | Unassigned | 371_11 | Clustered           | 31 VC_371_11 | 31  | 0.0927 | 1          | 0.0927 | 0 | 0 | 0 | 0.7011 Ref |
| MW544066 | Unassigned | Unassigned | Unassigned | 780_0  | Clustered           | 8 VC_780_0   | 8   | 0.5207 | 1          | 0.5207 | 0 | 0 | 0 | 1 Ref      |
| MW546064 | Unassigned | Unassigned | Unassigned | 149_8  | Clustered           | 66 VC_149_8  | 66  | 0.4565 | 1          | 0.4565 | 0 | 0 | 0 | 0.8182 Ref |
| MW546065 | Unassigned | Unassigned | Unassigned | 149_8  | Clustered           | 66 VC_149_8  | 66  | 0.4565 | 1          | 0.4565 | 0 | 0 | 0 | 0.8182 Ref |
| MW546066 | Unassigned | Unassigned | Unassigned | 149_8  | Clustered           | 66 VC_149_8  | 66  | 0.4565 | 1          | 0.4565 | 0 | 0 | 0 | 0.8182 Ref |
| MW546067 | Unassigned | Unassigned | Unassigned | 149_8  | Clustered           | 66 VC_149_8  | 66  | 0.4565 | 1          | 0.4565 | 0 | 0 | 0 | 0.8182 Ref |
| MW546068 | Unassigned | Unassigned | Unassigned | 149_8  | Clustered           | 66 VC_149_8  | 66  | 0.4565 | 1          | 0.4565 | 0 | 0 | 0 | 0.8182 Ref |
| MW546069 | Unassigned | Unassigned | Unassigned | 149_8  | Clustered           | 66 VC_149_8  | 66  | 0.4565 | 1          | 0.4565 | 0 | 0 | 0 | 0.8182 Ref |
| MW546070 | Unassigned | Unassigned | Unassigned | 149_8  | Clustered           | 66 VC_149_8  | 66  | 0.4565 | 1          | 0.4565 | 0 | 0 | 0 | 0.8182 Ref |
| MW546071 | Unassigned | Unassigned | Unassigned | 153_0  | Clustered           | 25 VC_153_0  | 25  | 0.7729 | 1          | 0.7729 | 0 | 0 | 0 | 1 Ref      |
| MW546072 | Unassigned | Unassigned | Unassigned | 149_8  | Clustered           | 66 VC_149_8  | 66  | 0.4565 | 1          | 0.4565 | 0 | 0 | 0 | 0.8182 Ref |
| MW546073 | Unassigned | Unassigned | Unassigned | 149_15 | Clustered           | 16 VC_149_15 | 16  | 0.0788 | 1          | 0.0788 | 0 | 0 | 0 | 0.8083 Ref |
| MW546074 | Unassigned | Unassigned | Unassigned | 149_8  | Clustered           | 66 VC_149_8  | 66  | 0.4565 | 1          | 0.4565 | 0 | 0 | 0 | 0.8182 Ref |
| MW546075 | Unassigned | Unassigned | Unassigned | 153_0  | Clustered           | 25 VC_153_0  | 25  | 0.7729 | 1          | 0.7729 | 0 | 0 | 0 | 1 Ref      |
| MW546076 | Unassigned | Unassigned | Unassigned | 153_0  | Clustered           | 25 VC_153_0  | 25  | 0.7729 | 1          | 0.7729 | 0 | 0 | 0 | 1 Ref      |
| MW546077 | Unassigned | Unassigned | Unassigned | 153_0  | Clustered           | 25 VC_153_0  | 25  | 0.7729 | 1          | 0.7729 | 0 | 0 | 0 | 1 Ref      |
| MW554488 | Unassigned | Unassigned | Unassigned | 9_0    | Clustered           | 38 VC_9_0    | 38  | 0.4895 | 1          | 0.4895 | 0 | 0 | 0 | 1 Ref      |
| MW557846 | Unassigned | Unassigned | Unassigned | 80_0   | Clustered           | 41 VC_80_0   | 41  | 0.5837 | 1          | 0.5837 | 0 | 0 | 0 | 0.9805 Ref |
| MW557853 | Unassigned | Unassigned | Unassigned | 306_0  | Clustered           | 2 VC_306_0   | 2   | 1      | 1          | 1      | 0 | 0 | 0 | 1 Ref      |
| MW567727 | Unassigned | Unassigned | Unassigned | 191_22 | Clustered/Singleton | 1 VC_191_22  | 1   | 0      | 1          | 0      | 0 | 0 | 0 | 1 Ref      |
| MW570842 | Unassigned | Unassigned | Unassigned | 958_0  | Clustered           | 3 VC_958_0   | 3   | 0.1441 | 0.99848014 | 0.1438 | 0 | 0 | 0 | 1 Ref      |
| MW574966 | Unassigned | Unassigned | Unassigned | 470_0  | Clustered           | 3 VC_470_0   | 3   | 0.5552 | 0.99823354 | 0.5543 | 0 | 0 | 0 | 1 Ref      |
| MW578835 | Unassigned | Unassigned | Unassigned | 888_0  | Clustered           | 28 VC_888_0  | 28  | 0.5497 | 1          | 0.5497 | 0 | 0 | 0 | 1 Ref      |
| MW578836 | Unassigned | Unassigned | Unassigned | 763_2  | Clustered           | 7 VC_763_2   | 7   | 0.2612 | 1          | 0.2612 | 0 | 0 | 0 | 1 Ref      |
| MW578837 | Unassigned | Unassigned | Unassigned | 1352_0 | Clustered           | 31 VC_1352_0 | 31  | 0.849  | 1          | 0.849  | 0 | 0 | 0 | 1 Ref      |
| MW582531 | Unassigned | Unassigned | Unassigned | 769_0  | Clustered           | 2 VC_769_0   | 2   | 0.0483 | 0.95514297 | 0.0462 | 0 | 0 | 0 | 1 Ref      |
| MW582634 | Unassigned | Unassigned | Unassigned | 409_0  | Clustered           | 3 VC_409_0   | 3   | 0.1496 | 0.98294101 | 0.147  | 0 | 0 | 0 | 1 Ref      |
| MW584148 | Unassigned | Unassigned | Unassigned | 555_0  | Clustered           | 13 VC_555_0  | 13  | 0.7516 | 1          | 0.7516 | 0 | 0 | 0 | 1 Ref      |
| MW584149 | Unassigned | Unassigned | Unassigned | 1092_0 | Clustered           | 12 VC_1092_0 | 12  | 0.8894 | 1          | 0.8894 | 0 | 0 | 0 | 1 Ref      |



|          |            |            |            |        |                     |              |    |        |            |        |   |   |   |            |
|----------|------------|------------|------------|--------|---------------------|--------------|----|--------|------------|--------|---|---|---|------------|
| MW584150 | Unassigned | Unassigned | Unassigned | 555_0  | Clustered           | 13 VC_555_0  | 13 | 0.7516 | 1          | 0.7516 | 0 | 0 | 0 | 1 Ref      |
| MW584151 | Unassigned | Unassigned | Unassigned | 1092_0 | Clustered           | 12 VC_1092_0 | 12 | 0.8894 | 1          | 0.8894 | 0 | 0 | 0 | 1 Ref      |
| MW584152 | Unassigned | Unassigned | Unassigned | 550_0  | Clustered           | 12 VC_550_0  | 12 | 0.802  | 1          | 0.802  | 0 | 0 | 0 | 1 Ref      |
| MW584154 | Unassigned | Unassigned | Unassigned | 555_0  | Clustered           | 13 VC_555_0  | 13 | 0.7516 | 1          | 0.7516 | 0 | 0 | 0 | 1 Ref      |
| MW584155 | Unassigned | Unassigned | Unassigned | 564_0  | Clustered           | 3 VC_564_0   | 3  | 0.3421 | 0.99849913 | 0.3415 | 0 | 0 | 0 | 1 Ref      |
| MW584156 | Unassigned | Unassigned | Unassigned | 555_0  | Clustered           | 13 VC_555_0  | 13 | 0.7516 | 1          | 0.7516 | 0 | 0 | 0 | 1 Ref      |
| MW584157 | Unassigned | Unassigned | Unassigned | 1047_0 | Clustered           | 5 VC_1047_0  | 5  | 0.6609 | 0.99999993 | 0.6609 | 0 | 0 | 0 | 1 Ref      |
| MW584158 | Unassigned | Unassigned | Unassigned | 550_0  | Clustered           | 12 VC_550_0  | 12 | 0.802  | 1          | 0.802  | 0 | 0 | 0 | 1 Ref      |
| MW584159 | Unassigned | Unassigned | Unassigned | 516_0  | Clustered           | 3 VC_516_0   | 3  | 0.4664 | 0.99856798 | 0.4658 | 0 | 0 | 0 | 1 Ref      |
| MW584160 | Unassigned | Unassigned | Unassigned | 763_0  | Clustered           | 2 VC_763_0   | 2  | 0.061  | 0.95095213 | 0.058  | 0 | 0 | 0 | 1 Ref      |
| MW584161 | Unassigned | Unassigned | Unassigned | 550_0  | Clustered           | 12 VC_550_0  | 12 | 0.802  | 1          | 0.802  | 0 | 0 | 0 | 1 Ref      |
| MW584162 | Unassigned | Unassigned | Unassigned | 555_0  | Clustered           | 13 VC_555_0  | 13 | 0.7516 | 1          | 0.7516 | 0 | 0 | 0 | 1 Ref      |
| MW584163 | Unassigned | Unassigned | Unassigned | 555_0  | Clustered           | 13 VC_555_0  | 13 | 0.7516 | 1          | 0.7516 | 0 | 0 | 0 | 1 Ref      |
| MW584164 | Unassigned | Unassigned | Unassigned | 550_0  | Clustered           | 12 VC_550_0  | 12 | 0.802  | 1          | 0.802  | 0 | 0 | 0 | 1 Ref      |
| MW584165 | Unassigned | Unassigned | Unassigned | 240_0  | Clustered           | 4 VC_240_0   | 4  | 0.7811 | 0.99998265 | 0.7811 | 0 | 0 | 0 | 1 Ref      |
| MW584168 | Unassigned | Unassigned | Unassigned | 684_0  | Clustered           | 5 VC_684_0   | 5  | 0.3915 | 0.99999995 | 0.3915 | 0 | 0 | 0 | 1 Ref      |
| MW584169 | Unassigned | Unassigned | Unassigned | 240_0  | Clustered           | 4 VC_240_0   | 4  | 0.7811 | 0.99998265 | 0.7811 | 0 | 0 | 0 | 1 Ref      |
| MW584170 | Unassigned | Unassigned | Unassigned | 958_0  | Clustered           | 3 VC_958_0   | 3  | 0.1441 | 0.99848014 | 0.1438 | 0 | 0 | 0 | 1 Ref      |
| MW584171 | Unassigned | Unassigned | Unassigned | 550_0  | Clustered           | 12 VC_550_0  | 12 | 0.802  | 1          | 0.802  | 0 | 0 | 0 | 1 Ref      |
| MW584172 | Unassigned | Unassigned | Unassigned | 684_0  | Clustered           | 5 VC_684_0   | 5  | 0.3915 | 0.99999995 | 0.3915 | 0 | 0 | 0 | 1 Ref      |
| MW584173 | Unassigned | Unassigned | Unassigned | 1047_0 | Clustered           | 5 VC_1047_0  | 5  | 0.6609 | 0.99999993 | 0.6609 | 0 | 0 | 0 | 1 Ref      |
| MW584175 | Unassigned | Unassigned | Unassigned | 564_0  | Clustered           | 3 VC_564_0   | 3  | 0.3421 | 0.99849913 | 0.3415 | 0 | 0 | 0 | 1 Ref      |
| MW584176 | Unassigned | Unassigned | Unassigned | 524_0  | Clustered           | 2 VC_524_0   | 2  | 0.113  | 0.95477567 | 0.1079 | 0 | 0 | 0 | 1 Ref      |
| MW584178 | Unassigned | Unassigned | Unassigned | 684_0  | Clustered           | 5 VC_684_0   | 5  | 0.3915 | 0.99999995 | 0.3915 | 0 | 0 | 0 | 1 Ref      |
| MW584179 | Unassigned | Unassigned | Unassigned | 550_0  | Clustered           | 12 VC_550_0  | 12 | 0.802  | 1          | 0.802  | 0 | 0 | 0 | 1 Ref      |
| MW584180 | Unassigned | Unassigned | Unassigned | 550_0  | Clustered           | 12 VC_550_0  | 12 | 0.802  | 1          | 0.802  | 0 | 0 | 0 | 1 Ref      |
| MW584181 | Unassigned | Unassigned | Unassigned | 555_0  | Clustered           | 13 VC_555_0  | 13 | 0.7516 | 1          | 0.7516 | 0 | 0 | 0 | 1 Ref      |
| MW584182 | Unassigned | Unassigned | Unassigned | 555_0  | Clustered           | 13 VC_555_0  | 13 | 0.7516 | 1          | 0.7516 | 0 | 0 | 0 | 1 Ref      |
| MW584184 | Unassigned | Unassigned | Unassigned | 1092_0 | Clustered           | 12 VC_1092_0 | 12 | 0.8894 | 1          | 0.8894 | 0 | 0 | 0 | 1 Ref      |
| MW584188 | Unassigned | Unassigned | Unassigned | 524_1  | Clustered/Singleton | 1 VC_524_1   | 1  | 0      | 1          | 0      | 0 | 0 | 0 | 1 Ref      |
| MW584189 | Unassigned | Unassigned | Unassigned | 1047_0 | Clustered           | 5 VC_1047_0  | 5  | 0.6609 | 0.99999993 | 0.6609 | 0 | 0 | 0 | 1 Ref      |
| MW584190 | Unassigned | Unassigned | Unassigned | 684_0  | Clustered           | 5 VC_684_0   | 5  | 0.3915 | 0.99999995 | 0.3915 | 0 | 0 | 0 | 1 Ref      |
| MW584191 | Unassigned | Unassigned | Unassigned | 958_0  | Clustered           | 3 VC_958_0   | 3  | 0.1441 | 0.99848014 | 0.1438 | 0 | 0 | 0 | 1 Ref      |
| MW584192 | Unassigned | Unassigned | Unassigned | 555_0  | Clustered           | 13 VC_555_0  | 13 | 0.7516 | 1          | 0.7516 | 0 | 0 | 0 | 1 Ref      |
| MW584193 | Unassigned | Unassigned | Unassigned | 1092_0 | Clustered           | 12 VC_1092_0 | 12 | 0.8894 | 1          | 0.8894 | 0 | 0 | 0 | 1 Ref      |
| MW584194 | Unassigned | Unassigned | Unassigned | 1092_0 | Clustered           | 12 VC_1092_0 | 12 | 0.8894 | 1          | 0.8894 | 0 | 0 | 0 | 1 Ref      |
| MW584196 | Unassigned | Unassigned | Unassigned | 550_0  | Clustered           | 12 VC_550_0  | 12 | 0.802  | 1          | 0.802  | 0 | 0 | 0 | 1 Ref      |
| MW584197 | Unassigned | Unassigned | Unassigned | 516_0  | Clustered           | 3 VC_516_0   | 3  | 0.4664 | 0.99856798 | 0.4658 | 0 | 0 | 0 | 1 Ref      |
| MW584198 | Unassigned | Unassigned | Unassigned | 1092_0 | Clustered           | 12 VC_1092_0 | 12 | 0.8894 | 1          | 0.8894 | 0 | 0 | 0 | 1 Ref      |
| MW584199 | Unassigned | Unassigned | Unassigned | 524_0  | Clustered           | 2 VC_524_0   | 2  | 0.113  | 0.95477567 | 0.1079 | 0 | 0 | 0 | 1 Ref      |
| MW584200 | Unassigned | Unassigned | Unassigned | 1092_0 | Clustered           | 12 VC_1092_0 | 12 | 0.8894 | 1          | 0.8894 | 0 | 0 | 0 | 1 Ref      |
| MW584201 | Unassigned | Unassigned | Unassigned | 564_0  | Clustered           | 3 VC_564_0   | 3  | 0.3421 | 0.99849913 | 0.3415 | 0 | 0 | 0 | 1 Ref      |
| MW584202 | Unassigned | Unassigned | Unassigned | 763_0  | Clustered           | 2 VC_763_0   | 2  | 0.061  | 0.95095213 | 0.058  | 0 | 0 | 0 | 1 Ref      |
| MW584203 | Unassigned | Unassigned | Unassigned | 555_0  | Clustered           | 13 VC_555_0  | 13 | 0.7516 | 1          | 0.7516 | 0 | 0 | 0 | 1 Ref      |
| MW584204 | Unassigned | Unassigned | Unassigned | 550_0  | Clustered           | 12 VC_550_0  | 12 | 0.802  | 1          | 0.802  | 0 | 0 | 0 | 1 Ref      |
| MW584205 | Unassigned | Unassigned | Unassigned | 1092_0 | Clustered           | 12 VC_1092_0 | 12 | 0.8894 | 1          | 0.8894 | 0 | 0 | 0 | 1 Ref      |
| MW584206 | Unassigned | Unassigned | Unassigned | 1047_0 | Clustered           | 5 VC_1047_0  | 5  | 0.6609 | 0.99999993 | 0.6609 | 0 | 0 | 0 | 1 Ref      |
| MW584207 | Unassigned | Unassigned | Unassigned | 240_0  | Clustered           | 4 VC_240_0   | 4  | 0.7811 | 0.99998265 | 0.7811 | 0 | 0 | 0 | 1 Ref      |
| MW584208 | Unassigned | Unassigned | Unassigned | 555_0  | Clustered           | 13 VC_555_0  | 13 | 0.7516 | 1          | 0.7516 | 0 | 0 | 0 | 1 Ref      |
| MW584209 | Unassigned | Unassigned | Unassigned | 1047_0 | Clustered           | 5 VC_1047_0  | 5  | 0.6609 | 0.99999993 | 0.6609 | 0 | 0 | 0 | 1 Ref      |
| MW584210 | Unassigned | Unassigned | Unassigned | 1092_0 | Clustered           | 12 VC_1092_0 | 12 | 0.8894 | 1          | 0.8894 | 0 | 0 | 0 | 1 Ref      |
| MW584212 | Unassigned | Unassigned | Unassigned | 555_0  | Clustered           | 13 VC_555_0  | 13 | 0.7516 | 1          | 0.7516 | 0 | 0 | 0 | 1 Ref      |
| MW584228 | Unassigned | Unassigned | Unassigned | 884_1  | Clustered           | 8 VC_884_1   | 8  | 0.1102 | 0.9989323  | 0.1101 | 0 | 0 | 0 | 0.75 Ref   |
| MW584871 | Unassigned | Unassigned | Unassigned | 600_2  | Clustered           | 10 VC_600_2  | 10 | 0.3041 | 1          | 0.3041 | 0 | 0 | 0 | 1 Ref      |
| MW590223 | Unassigned | Unassigned | Unassigned | 1168_0 | Clustered           | 2 VC_1168_0  | 2  | 0.099  | 0.93550199 | 0.0927 | 0 | 0 | 0 | 1 Ref      |
| MW590329 | Unassigned | Unassigned | Unassigned | 111_0  | Clustered           | 91 VC_111_0  | 91 | 0.9587 | 1          | 0.9587 | 0 | 0 | 0 | 1 Ref      |
| MW590698 | Unassigned | Unassigned | Unassigned | 608_0  | Clustered           | 5 VC_608_0   | 5  | 0.4331 | 0.99999996 | 0.4331 | 0 | 0 | 0 | 1 Ref      |
| MW595220 | Unassigned | Unassigned | Unassigned | 79_5   | Clustered           | 2 VC_79_5    | 2  | 0.0046 | 0.92781966 | 0.0043 | 0 | 0 | 0 | 1 Ref      |
| MW595221 | Unassigned | Unassigned | Unassigned | 79_0   | Clustered           | 64 VC_79_0   | 64 | 0.4185 | 1          | 0.4185 | 0 | 0 | 0 | 0.7649 Ref |
| MW596414 | Unassigned | Unassigned | Unassigned | 884_1  | Clustered           | 8 VC_884_1   | 8  | 0.1102 | 0.9989323  | 0.1101 | 0 | 0 | 0 | 0.75 Ref   |
| MW598258 | Unassigned | Unassigned | Unassigned | 584_0  | Clustered           | 28 VC_584_0  | 28 | 0.7704 | 1          | 0.7704 | 0 | 0 | 0 | 1 Ref      |
| MW598459 | Unassigned | Unassigned | Unassigned | 290_0  | Clustered           | 10 VC_290_0  | 10 | 0.0981 | 1          | 0.0981 | 0 | 0 | 0 | 1 Ref      |
| MW600722 | Unassigned | Unassigned | Unassigned | 385_0  | Clustered           | 51 VC_385_0  | 51 | 0.8754 | 1          | 0.8754 | 0 | 0 | 0 | 1 Ref      |
| MW601216 | Unassigned | Unassigned | Unassigned | 216_5  | Clustered           | 2 VC_216_5   | 2  | 0.0094 | 0.95747812 | 0.009  | 0 | 0 | 0 | 1 Ref      |
| MW601217 | Unassigned | Unassigned | Unassigned | 1352_0 | Clustered           | 31 VC_1352_0 | 31 | 0.849  | 1          | 0.849  | 0 | 0 | 0 | 1 Ref      |
| MW601218 | Unassigned | Unassigned | Unassigned | 234_0  | Clustered           | 21 VC_234_0  | 21 | 0.8355 | 1          | 0.8355 | 0 | 0 | 0 | 1 Ref      |
| MW601219 | Unassigned | Unassigned | Unassigned | 685_0  | Clustered           | 16 VC_685_0  | 16 | 0.2972 | 1          | 0.2972 | 0 | 0 | 0 | 0.9167 Ref |
| MW601220 | Unassigned | Unassigned | Unassigned | 1183_0 | Clustered           | 6 VC_1183_0  | 6  | 0.995  | 0.99996974 | 0.995  | 0 | 0 | 0 | 1 Ref      |
| MW601221 | Unassigned | Unassigned | Unassigned | 1234_0 | Clustered           | 44 VC_1234_0 | 44 | 1      | 1          | 1      | 0 | 0 | 0 | 1 Ref      |
| MW601222 | Unassigned | Unassigned | Unassigned | 237_1  | Clustered           | 13 VC_237_1  | 13 | 0.1773 | 1          | 0.1773 | 0 | 0 | 0 | 0.7308 Ref |
| MW601223 | Unassigned | Unassigned | Unassigned | 1075_0 | Clustered           | 4 VC_1075_0  | 4  | 0.1483 | 0.99998427 | 0.1483 | 0 | 0 | 0 | 1 Ref      |
| MW601224 | Unassigned | Unassigned | Unassigned | 1234_0 | Clustered           | 44 VC_1234_0 | 44 | 1      | 1          | 1      | 0 | 0 | 0 | 1 Ref      |
| MW601225 | Unassigned | Unassigned | Unassigned | 1176_0 | Clustered           | 41 VC_1176_0 | 41 | 0.9558 | 1          | 0.9558 | 0 | 0 | 0 | 0.9976 Ref |
| MW602648 | Unassigned | Unassigned | Unassigned | 428_0  | Clustered           | 33 VC_428_0  | 33 | 0.9915 | 1          | 0.9915 | 0 | 0 | 0 | 1 Ref      |
| MW623430 | Unassigned | Unassigned | Unassigned | 967_0  | Clustered           | 16 VC_967_0  | 16 | 0.8971 | 1          | 0.8971 | 0 | 0 | 0 | 1 Ref      |
| MW627293 | Unassigned | Unassigned | Unassigned | 7_0    | Clustered           | 28 VC_7_0    | 28 | 0.3916 | 1          | 0.3916 | 0 | 0 | 0 | 0.9947 Ref |
| MW627366 | Unassigned | Unassigned | Unassigned | 155_0  | Clustered           | 14 VC_155_0  | 14 | 0.6095 | 1          | 0.6095 | 0 | 0 | 0 | 1 Ref      |
| MW629017 | Unassigned | Unassigned | Unassigned | 669_0  | Clustered           | 21 VC_669_0  | 21 | 0.3623 | 1          | 0.3623 | 0 | 0 | 0 | 1 Ref      |
| MW630115 | Unassigned | Unassigned | Unassigned | 779_0  | Clustered           | 37 VC_779_0  | 37 | 0.5682 | 1          | 0.5682 | 0 | 0 | 0 | 1 Ref      |
| MW630116 | Unassigned | Unassigned | Unassigned | 286_13 | Clustered           | 10 VC_286_13 | 10 | 0.0698 | 0.99999929 | 0.0698 | 0 | 0 | 0 | 0.9556 Ref |
| MW633168 | Unassigned | Unassigned | Unassigned | 91_0   | Clustered           | 22 VC_91_0   | 22 | 0.5318 | 1          | 0.5318 | 0 | 0 | 0 | 1 Ref      |



|          |            |            |            |         |                     |     |            |     |        |            |        |   |   |   |        |     |
|----------|------------|------------|------------|---------|---------------------|-----|------------|-----|--------|------------|--------|---|---|---|--------|-----|
| MW650841 | Unassigned | Unassigned | Unassigned | 7_0     | Clustered           | 28  | VC_7_0     | 28  | 0.3916 | 1          | 0.3916 | 0 | 0 | 0 | 0.9947 | Ref |
| MW650886 | Unassigned | Unassigned | Unassigned | 131_1   | Clustered           | 6   | VC_131_1   | 6   | 0.057  | 0.99999999 | 0.057  | 0 | 0 | 0 | 1      | Ref |
| MW651859 | Unassigned | Unassigned | Unassigned | 355_0   | Clustered           | 2   | VC_355_0   | 2   | 0.0513 | 0.93418388 | 0.0479 | 0 | 0 | 0 | 1      | Ref |
| MW654182 | Unassigned | Unassigned | Unassigned | 952_0   | Clustered           | 2   | VC_952_0   | 2   | 0.9556 | 0.8861     | 0.8468 | 0 | 0 | 0 | 1      | Ref |
| MW655991 | Unassigned | Unassigned | Unassigned | 938_0   | Clustered           | 99  | VC_938_0   | 99  | 0.9119 | 1          | 0.9119 | 0 | 0 | 0 | 0.9928 | Ref |
| MW660583 | Unassigned | Unassigned | Unassigned | 1221_0  | Clustered/Singleton | 1   | VC_1221_0  | 1   | 0      | 1          | 0      | 0 | 0 | 0 | 1      | Ref |
| MW672037 | Unassigned | Unassigned | Unassigned | 938_0   | Clustered           | 99  | VC_938_0   | 99  | 0.9119 | 1          | 0.9119 | 0 | 0 | 0 | 0.9928 | Ref |
| MW672041 | Unassigned | Unassigned | Unassigned | 694_0   | Clustered/Singleton | 1   | VC_694_0   | 1   | 0      | 1          | 0      | 0 | 0 | 0 | 1      | Ref |
| MW677132 | Unassigned | Unassigned | Unassigned | 108_0   | Clustered           | 33  | VC_108_0   | 33  | 0.949  | 1          | 0.949  | 0 | 0 | 0 | 1      | Ref |
| MW677509 | Unassigned | Unassigned | Unassigned | 885_0   | Clustered           | 11  | VC_885_0   | 11  | 0.9774 | 1          | 0.9774 | 0 | 0 | 0 | 1      | Ref |
| MW677510 | Unassigned | Unassigned | Unassigned | 885_0   | Clustered           | 11  | VC_885_0   | 11  | 0.9774 | 1          | 0.9774 | 0 | 0 | 0 | 1      | Ref |
| MW677511 | Unassigned | Unassigned | Unassigned | 1029_0  | Clustered           | 4   | VC_1029_0  | 4   | 0.9006 | 0.99995764 | 0.9006 | 0 | 0 | 0 | 1      | Ref |
| MW677512 | Unassigned | Unassigned | Unassigned | 885_0   | Clustered           | 11  | VC_885_0   | 11  | 0.9774 | 1          | 0.9774 | 0 | 0 | 0 | 1      | Ref |
| MW677513 | Unassigned | Unassigned | Unassigned | 923_0   | Clustered           | 23  | VC_923_0   | 23  | 0.9455 | 1          | 0.9455 | 0 | 0 | 0 | 1      | Ref |
| MW677514 | Unassigned | Unassigned | Unassigned | 749_0   | Clustered           | 40  | VC_749_0   | 40  | 0.7517 | 1          | 0.7517 | 0 | 0 | 0 | 1      | Ref |
| MW677515 | Unassigned | Unassigned | Unassigned | 885_0   | Clustered           | 11  | VC_885_0   | 11  | 0.9774 | 1          | 0.9774 | 0 | 0 | 0 | 1      | Ref |
| MW677516 | Unassigned | Unassigned | Unassigned | 923_0   | Clustered           | 23  | VC_923_0   | 23  | 0.9455 | 1          | 0.9455 | 0 | 0 | 0 | 1      | Ref |
| MW677517 | Unassigned | Unassigned | Unassigned | 885_0   | Clustered           | 11  | VC_885_0   | 11  | 0.9774 | 1          | 0.9774 | 0 | 0 | 0 | 1      | Ref |
| MW677518 | Unassigned | Unassigned | Unassigned | 923_0   | Clustered           | 23  | VC_923_0   | 23  | 0.9455 | 1          | 0.9455 | 0 | 0 | 0 | 1      | Ref |
| MW677519 | Unassigned | Unassigned | Unassigned | 923_0   | Clustered           | 23  | VC_923_0   | 23  | 0.9455 | 1          | 0.9455 | 0 | 0 | 0 | 1      | Ref |
| MW677520 | Unassigned | Unassigned | Unassigned | 885_0   | Clustered           | 11  | VC_885_0   | 11  | 0.9774 | 1          | 0.9774 | 0 | 0 | 0 | 1      | Ref |
| MW677521 | Unassigned | Unassigned | Unassigned | 923_0   | Clustered           | 23  | VC_923_0   | 23  | 0.9455 | 1          | 0.9455 | 0 | 0 | 0 | 1      | Ref |
| MW677522 | Unassigned | Unassigned | Unassigned | 923_0   | Clustered           | 23  | VC_923_0   | 23  | 0.9455 | 1          | 0.9455 | 0 | 0 | 0 | 1      | Ref |
| MW677523 | Unassigned | Unassigned | Unassigned | 923_0   | Clustered           | 23  | VC_923_0   | 23  | 0.9455 | 1          | 0.9455 | 0 | 0 | 0 | 1      | Ref |
| MW677524 | Unassigned | Unassigned | Unassigned | 923_0   | Clustered           | 23  | VC_923_0   | 23  | 0.9455 | 1          | 0.9455 | 0 | 0 | 0 | 1      | Ref |
| MW677525 | Unassigned | Unassigned | Unassigned | 471_0   | Clustered           | 2   | VC_471_0   | 2   | 0.0804 | 0.95665719 | 0.0769 | 0 | 0 | 0 | 1      | Ref |
| MW677526 | Unassigned | Unassigned | Unassigned | 749_0   | Clustered           | 40  | VC_749_0   | 40  | 0.7517 | 1          | 0.7517 | 0 | 0 | 0 | 1      | Ref |
| MW677527 | Unassigned | Unassigned | Unassigned | 1029_0  | Clustered           | 4   | VC_1029_0  | 4   | 0.9006 | 0.99995764 | 0.9006 | 0 | 0 | 0 | 1      | Ref |
| MW677528 | Unassigned | Unassigned | Unassigned | 602_0   | Clustered           | 2   | VC_602_0   | 2   | 0.229  | 0.95560552 | 0.2188 | 0 | 0 | 0 | 1      | Ref |
| MW677529 | Unassigned | Unassigned | Unassigned | 886_1   | Clustered/Singleton | 1   | VC_886_1   | 1   | 0      | 1          | 0      | 0 | 0 | 0 | 1      | Ref |
| MW679410 | Unassigned | Unassigned | Unassigned | 290_5   | Clustered           | 14  | VC_290_5   | 14  | 0.1422 | 1          | 0.1422 | 0 | 0 | 0 | 0.9231 | Ref |
| MW689258 | Unassigned | Unassigned | Unassigned | 585_2   | Clustered/Singleton | 1   | VC_585_2   | 1   | 0      | 1          | 0      | 0 | 0 | 0 | 1      | Ref |
| MW712717 | Unassigned | Unassigned | Unassigned | 525_0   | Clustered           | 25  | VC_525_0   | 25  | 0.4597 | 1          | 0.4597 | 0 | 0 | 0 | 1      | Ref |
| MW712718 | Unassigned | Unassigned | Unassigned | 513_0   | Clustered           | 32  | VC_513_0   | 32  | 0.6881 | 1          | 0.6881 | 0 | 0 | 0 | 1      | Ref |
| MW712719 | Unassigned | Unassigned | Unassigned | 1036_0  | Clustered           | 11  | VC_1036_0  | 11  | 0.656  | 1          | 0.656  | 0 | 0 | 0 | 0.8727 | Ref |
| MW712720 | Unassigned | Unassigned | Unassigned | 371_11  | Clustered           | 31  | VC_371_11  | 31  | 0.0927 | 1          | 0.0927 | 0 | 0 | 0 | 0.7011 | Ref |
| MW712721 | Unassigned | Unassigned | Unassigned | 1234_0  | Clustered           | 44  | VC_1234_0  | 44  | 1      | 1          | 1      | 0 | 0 | 0 | 1      | Ref |
| MW712722 | Unassigned | Unassigned | Unassigned | 236_0   | Clustered           | 72  | VC_236_0   | 72  | 0.8104 | 1          | 0.8104 | 0 | 0 | 0 | 1      | Ref |
| MW712723 | Unassigned | Unassigned | Unassigned | 236_0   | Clustered           | 72  | VC_236_0   | 72  | 0.8104 | 1          | 0.8104 | 0 | 0 | 0 | 1      | Ref |
| MW712724 | Unassigned | Unassigned | Unassigned | 1171_0  | Clustered           | 21  | VC_1171_0  | 21  | 0.7125 | 1          | 0.7125 | 0 | 0 | 0 | 1      | Ref |
| MW712726 | Unassigned | Unassigned | Unassigned | 371_15  | Clustered           | 44  | VC_371_15  | 44  | 0.1391 | 1          | 0.1391 | 0 | 0 | 0 | 0.7474 | Ref |
| MW712727 | Unassigned | Unassigned | Unassigned | 1171_0  | Clustered           | 21  | VC_1171_0  | 21  | 0.7125 | 1          | 0.7125 | 0 | 0 | 0 | 1      | Ref |
| MW712728 | Unassigned | Unassigned | Unassigned | 1171_0  | Clustered           | 21  | VC_1171_0  | 21  | 0.7125 | 1          | 0.7125 | 0 | 0 | 0 | 1      | Ref |
| MW712729 | Unassigned | Unassigned | Unassigned | 558_27  | Clustered           | 2   | VC_558_27  | 2   | 0.0032 | 0.64135461 | 0.002  | 0 | 0 | 0 | 1      | Ref |
| MW712730 | Unassigned | Unassigned | Unassigned | 236_0   | Clustered           | 72  | VC_236_0   | 72  | 0.8104 | 1          | 0.8104 | 0 | 0 | 0 | 1      | Ref |
| MW712731 | Unassigned | Unassigned | Unassigned | 508_0   | Clustered           | 32  | VC_508_0   | 32  | 0.906  | 1          | 0.906  | 0 | 0 | 0 | 1      | Ref |
| MW712732 | Unassigned | Unassigned | Unassigned | 325_23  | Clustered           | 17  | VC_325_23  | 17  | 0.0716 | 1          | 0.0716 | 0 | 0 | 0 | 0.6397 | Ref |
| MW712733 | Unassigned | Unassigned | Unassigned | 236_0   | Clustered           | 72  | VC_236_0   | 72  | 0.8104 | 1          | 0.8104 | 0 | 0 | 0 | 1      | Ref |
| MW712734 | Unassigned | Unassigned | Unassigned | 236_0   | Clustered           | 72  | VC_236_0   | 72  | 0.8104 | 1          | 0.8104 | 0 | 0 | 0 | 1      | Ref |
| MW712735 | Unassigned | Unassigned | Unassigned | 1170_1  | Clustered           | 3   | VC_1170_1  | 3   | 0.308  | 0.99836447 | 0.3075 | 0 | 0 | 0 | 1      | Ref |
| MW712736 | Unassigned | Unassigned | Unassigned | 872_0   | Clustered           | 31  | VC_872_0   | 31  | 0.8151 | 1          | 0.8151 | 0 | 0 | 0 | 0.8194 | Ref |
| MW712737 | Unassigned | Unassigned | Unassigned | 556_0   | Clustered           | 21  | VC_556_0   | 21  | 0.9912 | 1          | 0.9912 | 0 | 0 | 0 | 1      | Ref |
| MW713383 | Unassigned | Unassigned | Unassigned | 763_1   | Clustered           | 9   | VC_763_1   | 9   | 0.3706 | 1          | 0.3706 | 0 | 0 | 0 | 1      | Ref |
| MW713578 | Unassigned | Unassigned | Unassigned | 192_0   | Clustered           | 15  | VC_192_0   | 15  | 0.5071 | 1          | 0.5071 | 0 | 0 | 0 | 1      | Ref |
| MW715619 | Unassigned | Unassigned | Unassigned | 637_0   | Clustered           | 115 | VC_637_0   | 115 | 0.731  | 1          | 0.731  | 0 | 0 | 0 | 0.8764 | Ref |
| MW722080 | Unassigned | Unassigned | Unassigned | 359_0   | Clustered           | 7   | VC_359_0   | 7   | 0.3703 | 1          | 0.3703 | 0 | 0 | 0 | 1      | Ref |
| MW722081 | Unassigned | Unassigned | Unassigned | 937_0   | Clustered           | 40  | VC_937_0   | 40  | 0.6809 | 1          | 0.6809 | 0 | 0 | 0 | 0.9359 | Ref |
| MW722082 | Unassigned | Unassigned | Unassigned | 460_0   | Clustered           | 19  | VC_460_0   | 19  | 0.3744 | 1          | 0.3744 | 0 | 0 | 0 | 1      | Ref |
| MW722083 | Unassigned | Unassigned | Unassigned | 476_0   | Clustered           | 19  | VC_476_0   | 19  | 0.7814 | 1          | 0.7814 | 0 | 0 | 0 | 1      | Ref |
| MW722521 | Unassigned | Unassigned | Unassigned | 28_0    | Clustered           | 2   | VC_28_0    | 2   | 0.0308 | 0.95719664 | 0.0295 | 0 | 0 | 0 | 1      | Ref |
| MW722821 | Unassigned | Unassigned | Unassigned | 638_0   | Clustered           | 45  | VC_638_0   | 45  | 0.7741 | 1          | 0.7741 | 0 | 0 | 0 | 1      | Ref |
| MW725301 | Unassigned | Unassigned | Unassigned | 540_0   | Clustered           | 15  | VC_540_0   | 15  | 0.2866 | 1          | 0.2866 | 0 | 0 | 0 | 1      | Ref |
| MW741821 | Unassigned | Unassigned | Unassigned | 813_1   | Clustered           | 24  | VC_813_1   | 24  | 0.535  | 1          | 0.535  | 0 | 0 | 0 | 1      | Ref |
| MW748991 | Unassigned | Unassigned | Unassigned | 451_0   | Clustered           | 80  | VC_451_0   | 80  | 0.9991 | 1          | 0.9991 | 0 | 0 | 0 | 1      | Ref |
| MW748992 | Unassigned | Unassigned | Unassigned | 530_0   | Clustered           | 9   | VC_530_0   | 9   | 0.8027 | 1          | 0.8027 | 0 | 0 | 0 | 1      | Ref |
| MW748993 | Unassigned | Unassigned | Unassigned | 297_0   | Clustered           | 5   | VC_297_0   | 5   | 0.1056 | 0.99999993 | 0.1056 | 0 | 0 | 0 | 0.9    | Ref |
| MW748998 | Unassigned | Unassigned | Unassigned | 772_17  | Clustered           | 2   | VC_772_17  | 2   | 0.006  | 0.57025912 | 0.0034 | 0 | 0 | 0 | 1      | Ref |
| MW748999 | Unassigned | Unassigned | Unassigned | 590_0   | Clustered           | 27  | VC_590_0   | 27  | 0.9947 | 1          | 0.9947 | 0 | 0 | 0 | 1      | Ref |
| MW749000 | Unassigned | Unassigned | Unassigned | 283_153 | Clustered/Singleton | 1   | VC_283_153 | 1   | 0      | 1          | 0      | 0 | 0 | 0 | 1      | Ref |
| MW749001 | Unassigned | Unassigned | Unassigned | 283_68  | Clustered/Singleton | 1   | VC_283_68  | 1   | 0      | 1          | 0      | 0 | 0 | 0 | 1      | Ref |
| MW749002 | Unassigned | Unassigned | Unassigned | 85_2    | Clustered           | 3   | VC_85_2    | 3   | 0.0334 | 0.99730296 | 0.0333 | 0 | 0 | 0 | 1      | Ref |
| MW749003 | Unassigned | Unassigned | Unassigned | 448_0   | Clustered           | 4   | VC_448_0   | 4   | 0.3059 | 0.99978853 | 0.3058 | 0 | 0 | 0 | 1      | Ref |
| MW749004 | Unassigned | Unassigned | Unassigned | 332_0   | Clustered           | 3   | VC_332_0   | 3   | 0.0411 | 0.99858754 | 0.041  | 0 | 0 | 0 | 1      | Ref |
| MW749005 | Unassigned | Unassigned | Unassigned | 835_0   | Clustered           | 67  | VC_835_0   | 67  | 0.9624 | 1          | 0.9624 | 0 | 0 | 0 | 1      | Ref |
| MW749007 | Unassigned | Unassigned | Unassigned | 85_2    | Clustered           | 3   | VC_85_2    | 3   | 0.0334 | 0.99730296 | 0.0333 | 0 | 0 | 0 | 1      | Ref |
| MW749010 | Unassigned | Unassigned | Unassigned | 332_0   | Clustered           | 3   | VC_332_0   | 3   | 0.0411 | 0.99858754 | 0.041  | 0 | 0 | 0 | 1      | Ref |
| MW760841 | Unassigned | Unassigned | Unassigned | 959_2   | Clustered           | 5   | VC_959_2   | 5   | 0.0484 | 0.89346426 | 0.0432 | 0 | 0 | 0 | 1      | Ref |
| MW767161 | Unassigned | Unassigned | Unassigned | 669_0   | Clustered           | 21  | VC_669_0   | 21  | 0.3623 | 1          | 0.3623 | 0 | 0 | 0 | 1      | Ref |
| MW767996 | Unassigned | Unassigned | Unassigned | 386_0   | Clustered           | 49  | VC_386_0   | 49  | 0.7941 | 1          | 0.7941 | 0 | 0 | 0 | 1      | Ref |
| MW787012 | Unassigned | Unassigned | Unassigned | 883_5   | Clustered/Singleton | 1   | VC_883_5   | 1   | 0      | 1          | 0      | 0 | 0 | 0 | 1      | Ref |
| MW790495 | Unassigned | Unassigned | Unassigned | 637_0   | Clustered           | 115 | VC_637_0   | 115 | 0.731  | 1          | 0.731  | 0 | 0 | 0 | 0.8764 | Ref |



[illegible]



|          |            |            |            |        |                     |              |    |        |            |        |   |   |   |            |
|----------|------------|------------|------------|--------|---------------------|--------------|----|--------|------------|--------|---|---|---|------------|
| MW822539 | Unassigned | Unassigned | Unassigned | 116_0  | Clustered           | 13 VC_116_0  | 13 | 1      | 1          | 1      | 0 | 0 | 0 | 1 Ref      |
| MW822601 | Unassigned | Unassigned | Unassigned | 482_0  | Clustered           | 4 VC_482_0   | 4  | 0.2975 | 0.99998416 | 0.2975 | 0 | 0 | 0 | 1 Ref      |
| MW824369 | Unassigned | Unassigned | Unassigned | 646_0  | Clustered           | 29 VC_646_0  | 29 | 0.9131 | 1          | 0.9131 | 0 | 0 | 0 | 1 Ref      |
| MW824370 | Unassigned | Unassigned | Unassigned | 135_1  | Clustered           | 2 VC_135_1   | 2  | 0.0299 | 0.95557637 | 0.0286 | 0 | 0 | 0 | 1 Ref      |
| MW824371 | Unassigned | Unassigned | Unassigned | 493_12 | Clustered           | 2 VC_493_12  | 2  | 0.0328 | 0.95557924 | 0.0313 | 0 | 0 | 0 | 1 Ref      |
| MW824372 | Unassigned | Unassigned | Unassigned | 493_12 | Clustered           | 2 VC_493_12  | 2  | 0.0328 | 0.95557924 | 0.0313 | 0 | 0 | 0 | 1 Ref      |
| MW824373 | Unassigned | Unassigned | Unassigned | 646_0  | Clustered           | 29 VC_646_0  | 29 | 0.9131 | 1          | 0.9131 | 0 | 0 | 0 | 1 Ref      |
| MW824374 | Unassigned | Unassigned | Unassigned | 646_0  | Clustered           | 29 VC_646_0  | 29 | 0.9131 | 1          | 0.9131 | 0 | 0 | 0 | 1 Ref      |
| MW824375 | Unassigned | Unassigned | Unassigned | 135_1  | Clustered           | 2 VC_135_1   | 2  | 0.0299 | 0.95557637 | 0.0286 | 0 | 0 | 0 | 1 Ref      |
| MW824376 | Unassigned | Unassigned | Unassigned | 493_13 | Clustered/Singleton | 1 VC_493_13  | 1  | 0      | 1          | 0      | 0 | 0 | 0 | 1 Ref      |
| MW824377 | Unassigned | Unassigned | Unassigned | 531_3  | Clustered/Singleton | 1 VC_531_3   | 1  | 0      | 1          | 0      | 0 | 0 | 0 | 1 Ref      |
| MW824378 | Unassigned | Unassigned | Unassigned | 646_0  | Clustered           | 29 VC_646_0  | 29 | 0.9131 | 1          | 0.9131 | 0 | 0 | 0 | 1 Ref      |
| MW824379 | Unassigned | Unassigned | Unassigned | 646_0  | Clustered           | 29 VC_646_0  | 29 | 0.9131 | 1          | 0.9131 | 0 | 0 | 0 | 1 Ref      |
| MW824380 | Unassigned | Unassigned | Unassigned | 499_0  | Clustered           | 24 VC_499_0  | 24 | 0.8569 | 1          | 0.8569 | 0 | 0 | 0 | 0.9529 Ref |
| MW824381 | Unassigned | Unassigned | Unassigned | 499_0  | Clustered           | 24 VC_499_0  | 24 | 0.8569 | 1          | 0.8569 | 0 | 0 | 0 | 0.9529 Ref |
| MW824382 | Unassigned | Unassigned | Unassigned | 499_0  | Clustered           | 24 VC_499_0  | 24 | 0.8569 | 1          | 0.8569 | 0 | 0 | 0 | 0.9529 Ref |
| MW824383 | Unassigned | Unassigned | Unassigned | 646_0  | Clustered           | 29 VC_646_0  | 29 | 0.9131 | 1          | 0.9131 | 0 | 0 | 0 | 1 Ref      |
| MW824384 | Unassigned | Unassigned | Unassigned | 1229_0 | Clustered           | 7 VC_1229_0  | 7  | 0.9924 | 0.99999987 | 0.9924 | 0 | 0 | 0 | 1 Ref      |
| MW824385 | Unassigned | Unassigned | Unassigned | 1229_0 | Clustered           | 7 VC_1229_0  | 7  | 0.9924 | 0.99999987 | 0.9924 | 0 | 0 | 0 | 1 Ref      |
| MW824386 | Unassigned | Unassigned | Unassigned | 1229_0 | Clustered           | 7 VC_1229_0  | 7  | 0.9924 | 0.99999987 | 0.9924 | 0 | 0 | 0 | 1 Ref      |
| MW824387 | Unassigned | Unassigned | Unassigned | 607_0  | Clustered           | 16 VC_607_0  | 16 | 0.9179 | 1          | 0.9179 | 0 | 0 | 0 | 1 Ref      |
| MW824388 | Unassigned | Unassigned | Unassigned | 807_0  | Clustered           | 17 VC_807_0  | 17 | 0.907  | 1          | 0.907  | 0 | 0 | 0 | 1 Ref      |
| MW824389 | Unassigned | Unassigned | Unassigned | 807_0  | Clustered           | 17 VC_807_0  | 17 | 0.907  | 1          | 0.907  | 0 | 0 | 0 | 1 Ref      |
| MW824391 | Unassigned | Unassigned | Unassigned | 529_0  | Clustered           | 2 VC_529_0   | 2  | 0.5141 | 0.95025688 | 0.4886 | 0 | 0 | 0 | 1 Ref      |
| MW824392 | Unassigned | Unassigned | Unassigned | 807_0  | Clustered           | 17 VC_807_0  | 17 | 0.907  | 1          | 0.907  | 0 | 0 | 0 | 1 Ref      |
| MW824393 | Unassigned | Unassigned | Unassigned | 807_0  | Clustered           | 17 VC_807_0  | 17 | 0.907  | 1          | 0.907  | 0 | 0 | 0 | 1 Ref      |
| MW824394 | Unassigned | Unassigned | Unassigned | 807_0  | Clustered           | 17 VC_807_0  | 17 | 0.907  | 1          | 0.907  | 0 | 0 | 0 | 1 Ref      |
| MW824395 | Unassigned | Unassigned | Unassigned | 1229_0 | Clustered           | 7 VC_1229_0  | 7  | 0.9924 | 0.99999987 | 0.9924 | 0 | 0 | 0 | 1 Ref      |
| MW824396 | Unassigned | Unassigned | Unassigned | 1229_0 | Clustered           | 7 VC_1229_0  | 7  | 0.9924 | 0.99999987 | 0.9924 | 0 | 0 | 0 | 1 Ref      |
| MW824397 | Unassigned | Unassigned | Unassigned | 1229_0 | Clustered           | 7 VC_1229_0  | 7  | 0.9924 | 0.99999987 | 0.9924 | 0 | 0 | 0 | 1 Ref      |
| MW824398 | Unassigned | Unassigned | Unassigned | 807_0  | Clustered           | 17 VC_807_0  | 17 | 0.907  | 1          | 0.907  | 0 | 0 | 0 | 1 Ref      |
| MW824399 | Unassigned | Unassigned | Unassigned | 807_0  | Clustered           | 17 VC_807_0  | 17 | 0.907  | 1          | 0.907  | 0 | 0 | 0 | 1 Ref      |
| MW824400 | Unassigned | Unassigned | Unassigned | 901_0  | Clustered           | 5 VC_901_0   | 5  | 0.9265 | 0.99999497 | 0.9265 | 0 | 0 | 0 | 1 Ref      |
| MW824401 | Unassigned | Unassigned | Unassigned | 529_0  | Clustered           | 2 VC_529_0   | 2  | 0.5141 | 0.95025688 | 0.4886 | 0 | 0 | 0 | 1 Ref      |
| MW824402 | Unassigned | Unassigned | Unassigned | 807_0  | Clustered           | 17 VC_807_0  | 17 | 0.907  | 1          | 0.907  | 0 | 0 | 0 | 1 Ref      |
| MW824403 | Unassigned | Unassigned | Unassigned | 807_0  | Clustered           | 17 VC_807_0  | 17 | 0.907  | 1          | 0.907  | 0 | 0 | 0 | 1 Ref      |
| MW824404 | Unassigned | Unassigned | Unassigned | 607_0  | Clustered           | 16 VC_607_0  | 16 | 0.9179 | 1          | 0.9179 | 0 | 0 | 0 | 1 Ref      |
| MW824405 | Unassigned | Unassigned | Unassigned | 807_0  | Clustered           | 17 VC_807_0  | 17 | 0.907  | 1          | 0.907  | 0 | 0 | 0 | 1 Ref      |
| MW824406 | Unassigned | Unassigned | Unassigned | 296_0  | Clustered           | 6 VC_296_0   | 6  | 0.5315 | 1          | 0.5315 | 0 | 0 | 0 | 1 Ref      |
| MW824407 | Unassigned | Unassigned | Unassigned | 758_0  | Clustered           | 18 VC_758_0  | 18 | 0.738  | 1          | 0.738  | 0 | 0 | 0 | 1 Ref      |
| MW824408 | Unassigned | Unassigned | Unassigned | 758_0  | Clustered           | 18 VC_758_0  | 18 | 0.738  | 1          | 0.738  | 0 | 0 | 0 | 1 Ref      |
| MW824409 | Unassigned | Unassigned | Unassigned | 758_0  | Clustered           | 18 VC_758_0  | 18 | 0.738  | 1          | 0.738  | 0 | 0 | 0 | 1 Ref      |
| MW824412 | Unassigned | Unassigned | Unassigned | 642_4  | Clustered           | 2 VC_642_4   | 2  | 0.0519 | 0.95604481 | 0.0496 | 0 | 0 | 0 | 1 Ref      |
| MW824413 | Unassigned | Unassigned | Unassigned | 642_4  | Clustered           | 2 VC_642_4   | 2  | 0.0519 | 0.95604481 | 0.0496 | 0 | 0 | 0 | 1 Ref      |
| MW824414 | Unassigned | Unassigned | Unassigned | 903_0  | Clustered           | 7 VC_903_0   | 7  | 0.7377 | 1          | 0.7377 | 0 | 0 | 0 | 1 Ref      |
| MW824415 | Unassigned | Unassigned | Unassigned | 973_0  | Clustered           | 8 VC_973_0   | 8  | 0.472  | 1          | 0.472  | 0 | 0 | 0 | 1 Ref      |
| MW824416 | Unassigned | Unassigned | Unassigned | 973_0  | Clustered           | 8 VC_973_0   | 8  | 0.472  | 1          | 0.472  | 0 | 0 | 0 | 1 Ref      |
| MW824417 | Unassigned | Unassigned | Unassigned | 901_0  | Clustered           | 5 VC_901_0   | 5  | 0.9265 | 0.99999497 | 0.9265 | 0 | 0 | 0 | 1 Ref      |
| MW824418 | Unassigned | Unassigned | Unassigned | 1050_1 | Clustered           | 29 VC_1050_1 | 29 | 0.4861 | 1          | 0.4861 | 0 | 0 | 0 | 0.9581 Ref |
| MW824419 | Unassigned | Unassigned | Unassigned | 973_0  | Clustered           | 8 VC_973_0   | 8  | 0.472  | 1          | 0.472  | 0 | 0 | 0 | 1 Ref      |
| MW824420 | Unassigned | Unassigned | Unassigned | 903_0  | Clustered           | 7 VC_903_0   | 7  | 0.7377 | 1          | 0.7377 | 0 | 0 | 0 | 1 Ref      |
| MW824421 | Unassigned | Unassigned | Unassigned | 901_0  | Clustered           | 5 VC_901_0   | 5  | 0.9265 | 0.99999497 | 0.9265 | 0 | 0 | 0 | 1 Ref      |
| MW824422 | Unassigned | Unassigned | Unassigned | 973_0  | Clustered           | 8 VC_973_0   | 8  | 0.472  | 1          | 0.472  | 0 | 0 | 0 | 1 Ref      |
| MW824423 | Unassigned | Unassigned | Unassigned | 973_0  | Clustered           | 8 VC_973_0   | 8  | 0.472  | 1          | 0.472  | 0 | 0 | 0 | 1 Ref      |
| MW824424 | Unassigned | Unassigned | Unassigned | 973_0  | Clustered           | 8 VC_973_0   | 8  | 0.472  | 1          | 0.472  | 0 | 0 | 0 | 1 Ref      |
| MW824425 | Unassigned | Unassigned | Unassigned | 973_0  | Clustered           | 8 VC_973_0   | 8  | 0.472  | 1          | 0.472  | 0 | 0 | 0 | 1 Ref      |
| MW824426 | Unassigned | Unassigned | Unassigned | 973_0  | Clustered           | 8 VC_973_0   | 8  | 0.472  | 1          | 0.472  | 0 | 0 | 0 | 1 Ref      |
| MW824427 | Unassigned | Unassigned | Unassigned | 903_0  | Clustered           | 7 VC_903_0   | 7  | 0.7377 | 1          | 0.7377 | 0 | 0 | 0 | 1 Ref      |
| MW824428 | Unassigned | Unassigned | Unassigned | 903_0  | Clustered           | 7 VC_903_0   | 7  | 0.7377 | 1          | 0.7377 | 0 | 0 | 0 | 1 Ref      |
| MW824429 | Unassigned | Unassigned | Unassigned | 903_0  | Clustered           | 7 VC_903_0   | 7  | 0.7377 | 1          | 0.7377 | 0 | 0 | 0 | 1 Ref      |
| MW824430 | Unassigned | Unassigned | Unassigned | 1050_1 | Clustered           | 29 VC_1050_1 | 29 | 0.4861 | 1          | 0.4861 | 0 | 0 | 0 | 0.9581 Ref |
| MW824431 | Unassigned | Unassigned | Unassigned | 901_0  | Clustered           | 5 VC_901_0   | 5  | 0.9265 | 0.99999497 | 0.9265 | 0 | 0 | 0 | 1 Ref      |
| MW824432 | Unassigned | Unassigned | Unassigned | 1050_1 | Clustered           | 29 VC_1050_1 | 29 | 0.4861 | 1          | 0.4861 | 0 | 0 | 0 | 0.9581 Ref |
| MW824433 | Unassigned | Unassigned | Unassigned | 1050_1 | Clustered           | 29 VC_1050_1 | 29 | 0.4861 | 1          | 0.4861 | 0 | 0 | 0 | 0.9581 Ref |
| MW824434 | Unassigned | Unassigned | Unassigned | 1050_1 | Clustered           | 29 VC_1050_1 | 29 | 0.4861 | 1          | 0.4861 | 0 | 0 | 0 | 0.9581 Ref |
| MW835180 | Unassigned | Unassigned | Unassigned | 465_0  | Clustered           | 7 VC_465_0   | 7  | 0.3322 | 1          | 0.3322 | 0 | 0 | 0 | 1 Ref      |
| MW845758 | Unassigned | Unassigned | Unassigned | 959_3  | Clustered           | 3 VC_959_3   | 3  | 0.0237 | 0.75911548 | 0.018  | 0 | 0 | 0 | 1 Ref      |
| MW845759 | Unassigned | Unassigned | Unassigned | 959_0  | Clustered           | 5 VC_959_0   | 5  | 0.0499 | 0.99999231 | 0.0499 | 0 | 0 | 0 | 1 Ref      |
| MW845760 | Unassigned | Unassigned | Unassigned | 489_0  | Clustered           | 3 VC_489_0   | 3  | 0.0677 | 0.98259158 | 0.0666 | 0 | 0 | 0 | 1 Ref      |
| MW862109 | Unassigned | Unassigned | Unassigned | 298_1  | Clustered/Singleton | 1 VC_298_1   | 1  | 0      | 1          | 0      | 0 | 0 | 0 | 1 Ref      |
| MW862804 | Unassigned | Unassigned | Unassigned | 835_0  | Clustered           | 67 VC_835_0  | 67 | 0.9624 | 1          | 0.9624 | 0 | 0 | 0 | 1 Ref      |
| MW862979 | Unassigned | Unassigned | Unassigned | 236_0  | Clustered           | 72 VC_236_0  | 72 | 0.8104 | 1          | 0.8104 | 0 | 0 | 0 | 1 Ref      |
| MW862980 | Unassigned | Unassigned | Unassigned | 371_11 | Clustered           | 31 VC_371_11 | 31 | 0.0927 | 1          | 0.0927 | 0 | 0 | 0 | 0.7011 Ref |
| MW862981 | Unassigned | Unassigned | Unassigned | 1206_0 | Clustered           | 8 VC_1206_0  | 8  | 0.1913 | 1          | 0.1913 | 0 | 0 | 0 | 1 Ref      |
| MW862982 | Unassigned | Unassigned | Unassigned | 1073_0 | Clustered           | 24 VC_1073_0 | 24 | 0.8388 | 1          | 0.8388 | 0 | 0 | 0 | 1 Ref      |
| MW862983 | Unassigned | Unassigned | Unassigned | 325_29 | Clustered           | 3 VC_325_29  | 3  | 0.0115 | 0.99857442 | 0.0115 | 0 | 0 | 0 | 1 Ref      |
| MW862984 | Unassigned | Unassigned | Unassigned | 236_0  | Clustered           | 72 VC_236_0  | 72 | 0.8104 | 1          | 0.8104 | 0 | 0 | 0 | 1 Ref      |
| MW862985 | Unassigned | Unassigned | Unassigned | 236_0  | Clustered           | 72 VC_236_0  | 72 | 0.8104 | 1          | 0.8104 | 0 | 0 | 0 | 1 Ref      |
| MW862986 | Unassigned | Unassigned | Unassigned | 1184_0 | Clustered           | 5 VC_1184_0  | 5  | 0.6591 | 0.99999982 | 0.6591 | 0 | 0 | 0 | 1 Ref      |
| MW862987 | Unassigned | Unassigned | Unassigned | 799_1  | Clustered           | 27 VC_799_1  | 27 | 0.8611 | 1          | 0.8611 | 0 | 0 | 0 | 1 Ref      |
| MW862988 | Unassigned | Unassigned | Unassigned | 919_0  | Clustered           | 39 VC_919_0  | 39 | 0.9069 | 1          | 0.9069 | 0 | 0 | 0 | 1 Ref      |



|          |            |            |            |         |                     |              |     |        |            |        |   |   |   |            |
|----------|------------|------------|------------|---------|---------------------|--------------|-----|--------|------------|--------|---|---|---|------------|
| MW862990 | Unassigned | Unassigned | Unassigned | 236_0   | Clustered           | 72 VC_236_0  | 72  | 0.8104 | 1          | 0.8104 | 0 | 0 | 0 | 1 Ref      |
| MW862991 | Unassigned | Unassigned | Unassigned | 1360_0  | Clustered           | 31 VC_1360_0 | 31  | 0.8837 | 1          | 0.8837 | 0 | 0 | 0 | 1 Ref      |
| MW862992 | Unassigned | Unassigned | Unassigned | 1170_2  | Clustered           | 2 VC_1170_2  | 2   | 0.0769 | 0.95418906 | 0.0734 | 0 | 0 | 0 | 1 Ref      |
| MW862993 | Unassigned | Unassigned | Unassigned | 371_11  | Clustered           | 31 VC_371_11 | 31  | 0.0927 | 1          | 0.0927 | 0 | 0 | 0 | 0.7011 Ref |
| MW865291 | Unassigned | Unassigned | Unassigned | 1027_0  | Clustered           | 20 VC_1027_0 | 20  | 0.7114 | 1          | 0.7114 | 0 | 0 | 0 | 1 Ref      |
| MW865292 | Unassigned | Unassigned | Unassigned | 175_0   | Clustered           | 4 VC_175_0   | 4   | 0.3847 | 0.99998259 | 0.3846 | 0 | 0 | 0 | 1 Ref      |
| MW865297 | Unassigned | Unassigned | Unassigned | 758_0   | Clustered           | 18 VC_758_0  | 18  | 0.738  | 1          | 0.738  | 0 | 0 | 0 | 1 Ref      |
| MW865299 | Unassigned | Unassigned | Unassigned | 758_0   | Clustered           | 18 VC_758_0  | 18  | 0.738  | 1          | 0.738  | 0 | 0 | 0 | 1 Ref      |
| MW865302 | Unassigned | Unassigned | Unassigned | 758_0   | Clustered           | 18 VC_758_0  | 18  | 0.738  | 1          | 0.738  | 0 | 0 | 0 | 1 Ref      |
| MW865307 | Unassigned | Unassigned | Unassigned | 758_0   | Clustered           | 18 VC_758_0  | 18  | 0.738  | 1          | 0.738  | 0 | 0 | 0 | 1 Ref      |
| MW865319 | Unassigned | Unassigned | Unassigned | 903_0   | Clustered           | 7 VC_903_0   | 7   | 0.7377 | 1          | 0.7377 | 0 | 0 | 0 | 1 Ref      |
| MW876471 | Unassigned | Unassigned | Unassigned | 451_0   | Clustered           | 80 VC_451_0  | 80  | 0.9991 | 1          | 0.9991 | 0 | 0 | 0 | 1 Ref      |
| MW879340 | Unassigned | Unassigned | Unassigned | 489_0   | Clustered           | 3 VC_489_0   | 3   | 0.0677 | 0.98259158 | 0.0666 | 0 | 0 | 0 | 1 Ref      |
| MW879342 | Unassigned | Unassigned | Unassigned | 164_7   | Clustered           | 7 VC_164_7   | 7   | 0.0956 | 0.99998    | 0.0956 | 0 | 0 | 0 | 1 Ref      |
| MW879343 | Unassigned | Unassigned | Unassigned | 164_7   | Clustered           | 7 VC_164_7   | 7   | 0.0956 | 0.99998    | 0.0956 | 0 | 0 | 0 | 1 Ref      |
| MW879344 | Unassigned | Unassigned | Unassigned | 164_7   | Clustered           | 7 VC_164_7   | 7   | 0.0956 | 0.99998    | 0.0956 | 0 | 0 | 0 | 1 Ref      |
| MW882907 | Unassigned | Unassigned | Unassigned | 286_11  | Clustered           | 3 VC_286_11  | 3   | 0.0146 | 0.93460284 | 0.0137 | 0 | 0 | 0 | 1 Ref      |
| MW883059 | Unassigned | Unassigned | Unassigned | 283_172 | Clustered/Singleton | 1 VC_283_172 | 1   | 0      | 1          | 0      | 0 | 0 | 0 | 1 Ref      |
| MW883060 | Unassigned | Unassigned | Unassigned | 392_0   | Clustered           | 126 VC_392_0 | 126 | 0.9621 | 1          | 0.9621 | 0 | 0 | 0 | 1 Ref      |
| MW883061 | Unassigned | Unassigned | Unassigned | 772_4   | Clustered           | 4 VC_772_4   | 4   | 0.0181 | 0.73018303 | 0.0132 | 0 | 0 | 0 | 1 Ref      |
| MW900438 | Unassigned | Unassigned | Unassigned | 1051_0  | Clustered           | 2 VC_1051_0  | 2   | 1      | 1          | 1      | 0 | 0 | 0 | 1 Ref      |
| MW911612 | Unassigned | Unassigned | Unassigned | 495_1   | Clustered           | 41 VC_495_1  | 41  | 0.328  | 1          | 0.328  | 0 | 0 | 0 | 0.911 Ref  |
| MW911613 | Unassigned | Unassigned | Unassigned | 495_1   | Clustered           | 41 VC_495_1  | 41  | 0.328  | 1          | 0.328  | 0 | 0 | 0 | 0.911 Ref  |
| MW911614 | Unassigned | Unassigned | Unassigned | 495_1   | Clustered           | 41 VC_495_1  | 41  | 0.328  | 1          | 0.328  | 0 | 0 | 0 | 0.911 Ref  |
| MW911615 | Unassigned | Unassigned | Unassigned | 495_1   | Clustered           | 41 VC_495_1  | 41  | 0.328  | 1          | 0.328  | 0 | 0 | 0 | 0.911 Ref  |
| MW916539 | Unassigned | Unassigned | Unassigned | 830_0   | Clustered           | 6 VC_830_0   | 6   | 0.6536 | 1          | 0.6536 | 0 | 0 | 0 | 1 Ref      |
| MW924497 | Unassigned | Unassigned | Unassigned | 8_0     | Clustered           | 58 VC_8_0    | 58  | 0.8306 | 1          | 0.8306 | 0 | 0 | 0 | 0.9946 Ref |
| MW924638 | Unassigned | Unassigned | Unassigned | 1171_0  | Clustered           | 21 VC_1171_0 | 21  | 0.7125 | 1          | 0.7125 | 0 | 0 | 0 | 1 Ref      |
| MW924639 | Unassigned | Unassigned | Unassigned | 810_0   | Clustered           | 18 VC_810_0  | 18  | 0.9121 | 1          | 0.9121 | 0 | 0 | 0 | 1 Ref      |
| MW924640 | Unassigned | Unassigned | Unassigned | 1234_0  | Clustered           | 44 VC_1234_0 | 44  | 1      | 1          | 1      | 0 | 0 | 0 | 1 Ref      |
| MW924642 | Unassigned | Unassigned | Unassigned | 1344_0  | Clustered           | 78 VC_1344_0 | 78  | 0.9732 | 1          | 0.9732 | 0 | 0 | 0 | 1 Ref      |
| MW924643 | Unassigned | Unassigned | Unassigned | 216_6   | Clustered           | 42 VC_216_6  | 42  | 0.473  | 1          | 0.473  | 0 | 0 | 0 | 0.8351 Ref |
| MW924644 | Unassigned | Unassigned | Unassigned | 509_0   | Clustered           | 37 VC_509_0  | 37  | 0.9689 | 1          | 0.9689 | 0 | 0 | 0 | 1 Ref      |
| MW924645 | Unassigned | Unassigned | Unassigned | 1093_0  | Clustered           | 40 VC_1093_0 | 40  | 0.8754 | 1          | 0.8754 | 0 | 0 | 0 | 1 Ref      |
| MW924646 | Unassigned | Unassigned | Unassigned | 215_1   | Clustered           | 19 VC_215_1  | 19  | 0.4188 | 1          | 0.4188 | 0 | 0 | 0 | 1 Ref      |
| MW924647 | Unassigned | Unassigned | Unassigned | 1234_0  | Clustered           | 44 VC_1234_0 | 44  | 1      | 1          | 1      | 0 | 0 | 0 | 1 Ref      |
| MW924648 | Unassigned | Unassigned | Unassigned | 525_0   | Clustered           | 25 VC_525_0  | 25  | 0.4597 | 1          | 0.4597 | 0 | 0 | 0 | 1 Ref      |
| MW924649 | Unassigned | Unassigned | Unassigned | 520_31  | Clustered           | 11 VC_520_31 | 11  | 0.0897 | 1          | 0.0897 | 0 | 0 | 0 | 0.6 Ref    |
| MW924650 | Unassigned | Unassigned | Unassigned | 525_0   | Clustered           | 25 VC_525_0  | 25  | 0.4597 | 1          | 0.4597 | 0 | 0 | 0 | 1 Ref      |
| MW924889 | Unassigned | Unassigned | Unassigned | 10_0    | Clustered           | 25 VC_10_0   | 25  | 0.3467 | 1          | 0.3467 | 0 | 0 | 0 | 0.9733 Ref |
| MW926912 | Unassigned | Unassigned | Unassigned | 699_0   | Clustered           | 71 VC_699_0  | 71  | 0.9352 | 1          | 0.9352 | 0 | 0 | 0 | 1 Ref      |
| MW927511 | Unassigned | Unassigned | Unassigned | 708_0   | Clustered           | 47 VC_708_0  | 47  | 0.8654 | 1          | 0.8654 | 0 | 0 | 0 | 1 Ref      |
| MW927513 | Unassigned | Unassigned | Unassigned | 708_0   | Clustered           | 47 VC_708_0  | 47  | 0.8654 | 1          | 0.8654 | 0 | 0 | 0 | 1 Ref      |
| MW927514 | Unassigned | Unassigned | Unassigned | 708_0   | Clustered           | 47 VC_708_0  | 47  | 0.8654 | 1          | 0.8654 | 0 | 0 | 0 | 1 Ref      |
| MW927515 | Unassigned | Unassigned | Unassigned | 708_0   | Clustered           | 47 VC_708_0  | 47  | 0.8654 | 1          | 0.8654 | 0 | 0 | 0 | 1 Ref      |
| MW927516 | Unassigned | Unassigned | Unassigned | 708_0   | Clustered           | 47 VC_708_0  | 47  | 0.8654 | 1          | 0.8654 | 0 | 0 | 0 | 1 Ref      |
| MW927517 | Unassigned | Unassigned | Unassigned | 708_0   | Clustered           | 47 VC_708_0  | 47  | 0.8654 | 1          | 0.8654 | 0 | 0 | 0 | 1 Ref      |
| MW927519 | Unassigned | Unassigned | Unassigned | 708_0   | Clustered           | 47 VC_708_0  | 47  | 0.8654 | 1          | 0.8654 | 0 | 0 | 0 | 1 Ref      |
| MW927520 | Unassigned | Unassigned | Unassigned | 708_0   | Clustered           | 47 VC_708_0  | 47  | 0.8654 | 1          | 0.8654 | 0 | 0 | 0 | 1 Ref      |
| MW927521 | Unassigned | Unassigned | Unassigned | 708_0   | Clustered           | 47 VC_708_0  | 47  | 0.8654 | 1          | 0.8654 | 0 | 0 | 0 | 1 Ref      |
| MW927522 | Unassigned | Unassigned | Unassigned | 708_0   | Clustered           | 47 VC_708_0  | 47  | 0.8654 | 1          | 0.8654 | 0 | 0 | 0 | 1 Ref      |
| MW927523 | Unassigned | Unassigned | Unassigned | 708_0   | Clustered           | 47 VC_708_0  | 47  | 0.8654 | 1          | 0.8654 | 0 | 0 | 0 | 1 Ref      |
| MW927524 | Unassigned | Unassigned | Unassigned | 708_0   | Clustered           | 47 VC_708_0  | 47  | 0.8654 | 1          | 0.8654 | 0 | 0 | 0 | 1 Ref      |
| MW927525 | Unassigned | Unassigned | Unassigned | 708_0   | Clustered           | 47 VC_708_0  | 47  | 0.8654 | 1          | 0.8654 | 0 | 0 | 0 | 1 Ref      |
| MW929175 | Unassigned | Unassigned | Unassigned | 755_0   | Clustered           | 9 VC_755_0   | 9   | 0.4489 | 1          | 0.4489 | 0 | 0 | 0 | 1 Ref      |
| MW929182 | Unassigned | Unassigned | Unassigned | 813_1   | Clustered           | 24 VC_813_1  | 24  | 0.535  | 1          | 0.535  | 0 | 0 | 0 | 1 Ref      |
| MW934263 | Unassigned | Unassigned | Unassigned | 113_0   | Clustered           | 9 VC_113_0   | 9   | 0.519  | 1          | 0.519  | 0 | 0 | 0 | 1 Ref      |
| MW960029 | Unassigned | Unassigned | Unassigned | 1403_0  | Clustered           | 28 VC_1403_0 | 28  | 0.753  | 1          | 0.753  | 0 | 0 | 0 | 1 Ref      |
| MW960030 | Unassigned | Unassigned | Unassigned | 724_0   | Clustered           | 3 VC_724_0   | 3   | 0.1586 | 0.99815158 | 0.1583 | 0 | 0 | 0 | 1 Ref      |
| MW960031 | Unassigned | Unassigned | Unassigned | 124_0   | Clustered           | 2 VC_124_0   | 2   | 0.3934 | 0.95337092 | 0.3751 | 0 | 0 | 0 | 1 Ref      |
| MW960032 | Unassigned | Unassigned | Unassigned | 770_0   | Clustered           | 5 VC_770_0   | 5   | 0.8394 | 0.99999405 | 0.8394 | 0 | 0 | 0 | 1 Ref      |
| MW960034 | Unassigned | Unassigned | Unassigned | 987_0   | Clustered           | 22 VC_987_0  | 22  | 0.8955 | 1          | 0.8955 | 0 | 0 | 0 | 1 Ref      |
| MW960035 | Unassigned | Unassigned | Unassigned | 1403_0  | Clustered           | 28 VC_1403_0 | 28  | 0.753  | 1          | 0.753  | 0 | 0 | 0 | 1 Ref      |
| MW960036 | Unassigned | Unassigned | Unassigned | 783_0   | Clustered           | 3 VC_783_0   | 3   | 0.0639 | 0.99854307 | 0.0638 | 0 | 0 | 0 | 1 Ref      |
| MW960038 | Unassigned | Unassigned | Unassigned | 783_0   | Clustered           | 3 VC_783_0   | 3   | 0.0639 | 0.99854307 | 0.0638 | 0 | 0 | 0 | 1 Ref      |
| MW978786 | Unassigned | Unassigned | Unassigned | 597_0   | Clustered           | 6 VC_597_0   | 6   | 0.1801 | 1          | 0.1801 | 0 | 0 | 0 | 1 Ref      |
| MW980062 | Unassigned | Unassigned | Unassigned | 987_0   | Clustered           | 22 VC_987_0  | 22  | 0.8955 | 1          | 0.8955 | 0 | 0 | 0 | 1 Ref      |
| MW980063 | Unassigned | Unassigned | Unassigned | 1416_0  | Clustered           | 5 VC_1416_0  | 5   | 0.9955 | 0.99988353 | 0.9954 | 0 | 0 | 0 | 1 Ref      |
| MW980064 | Unassigned | Unassigned | Unassigned | 1416_0  | Clustered           | 5 VC_1416_0  | 5   | 0.9955 | 0.99988353 | 0.9954 | 0 | 0 | 0 | 1 Ref      |
| MW980065 | Unassigned | Unassigned | Unassigned | 987_0   | Clustered           | 22 VC_987_0  | 22  | 0.8955 | 1          | 0.8955 | 0 | 0 | 0 | 1 Ref      |
| MW980067 | Unassigned | Unassigned | Unassigned | 1403_0  | Clustered           | 28 VC_1403_0 | 28  | 0.753  | 1          | 0.753  | 0 | 0 | 0 | 1 Ref      |
| MW980068 | Unassigned | Unassigned | Unassigned | 908_0   | Clustered           | 3 VC_908_0   | 3   | 0.5083 | 0.9972453  | 0.5069 | 0 | 0 | 0 | 1 Ref      |
| MW980069 | Unassigned | Unassigned | Unassigned | 970_0   | Clustered           | 9 VC_970_0   | 9   | 0.9685 | 1          | 0.9685 | 0 | 0 | 0 | 1 Ref      |
| MW980070 | Unassigned | Unassigned | Unassigned | 481_0   | Clustered           | 8 VC_481_0   | 8   | 0.1348 | 1          | 0.1348 | 0 | 0 | 0 | 1 Ref      |
| MW980073 | Unassigned | Unassigned | Unassigned | 946_0   | Clustered           | 11 VC_946_0  | 11  | 0.7352 | 1          | 0.7352 | 0 | 0 | 0 | 1 Ref      |
| MW980074 | Unassigned | Unassigned | Unassigned | 987_0   | Clustered           | 22 VC_987_0  | 22  | 0.8955 | 1          | 0.8955 | 0 | 0 | 0 | 1 Ref      |
| MZ004649 | Unassigned | Unassigned | Unassigned | 540_0   | Clustered           | 15 VC_540_0  | 15  | 0.2866 | 1          | 0.2866 | 0 | 0 | 0 | 1 Ref      |
| MZ005670 | Unassigned | Unassigned | Unassigned | 1163_0  | Clustered           | 28 VC_1163_0 | 28  | 0.4923 | 1          | 0.4923 | 0 | 0 | 0 | 1 Ref      |
| MZ005671 | Unassigned | Unassigned | Unassigned | 572_0   | Clustered           | 16 VC_572_0  | 16  | 0.7286 | 1          | 0.7286 | 0 | 0 | 0 | 1 Ref      |
| MZ005672 | Unassigned | Unassigned | Unassigned | 810_0   | Clustered           | 18 VC_810_0  | 18  | 0.9121 | 1          | 0.9121 | 0 | 0 | 0 | 1 Ref      |
| MZ005673 | Unassigned | Unassigned | Unassigned | 517_1   | Clustered           | 108 VC_517_1 | 108 | 0.8483 | 1          | 0.8483 | 0 | 0 | 0 | 0.9955 Ref |



|          |            |            |            |         |                     |               |     |        |            |        |   |   |   |            |
|----------|------------|------------|------------|---------|---------------------|---------------|-----|--------|------------|--------|---|---|---|------------|
| MZ005674 | Unassigned | Unassigned | Unassigned | 236_0   | Clustered           | 72 VC_236_0   | 72  | 0.8104 | 1          | 0.8104 | 0 | 0 | 0 | 1 Ref      |
| MZ005675 | Unassigned | Unassigned | Unassigned | 799_1   | Clustered           | 27 VC_799_1   | 27  | 0.8611 | 1          | 0.8611 | 0 | 0 | 0 | 1 Ref      |
| MZ005676 | Unassigned | Unassigned | Unassigned | 1344_0  | Clustered           | 78 VC_1344_0  | 78  | 0.9732 | 1          | 0.9732 | 0 | 0 | 0 | 1 Ref      |
| MZ005677 | Unassigned | Unassigned | Unassigned | 954_0   | Clustered           | 13 VC_954_0   | 13  | 0.863  | 1          | 0.863  | 0 | 0 | 0 | 1 Ref      |
| MZ005678 | Unassigned | Unassigned | Unassigned | 1344_0  | Clustered           | 78 VC_1344_0  | 78  | 0.9732 | 1          | 0.9732 | 0 | 0 | 0 | 1 Ref      |
| MZ005679 | Unassigned | Unassigned | Unassigned | 888_1   | Clustered           | 3 VC_888_1    | 3   | 0.0289 | 0.99848448 | 0.0289 | 0 | 0 | 0 | 1 Ref      |
| MZ005680 | Unassigned | Unassigned | Unassigned | 1178_0  | Clustered           | 24 VC_1178_0  | 24  | 0.9524 | 1          | 0.9524 | 0 | 0 | 0 | 1 Ref      |
| MZ005682 | Unassigned | Unassigned | Unassigned | 1207_0  | Clustered           | 29 VC_1207_0  | 29  | 0.8225 | 1          | 0.8225 | 0 | 0 | 0 | 1 Ref      |
| MZ005683 | Unassigned | Unassigned | Unassigned | 799_1   | Clustered           | 27 VC_799_1   | 27  | 0.8611 | 1          | 0.8611 | 0 | 0 | 0 | 1 Ref      |
| MZ005684 | Unassigned | Unassigned | Unassigned | 1240_0  | Clustered           | 82 VC_1240_0  | 82  | 0.7945 | 1          | 0.7945 | 0 | 0 | 0 | 1 Ref      |
| MZ005685 | Unassigned | Unassigned | Unassigned | 223_0   | Clustered           | 38 VC_223_0   | 38  | 0.9095 | 1          | 0.9095 | 0 | 0 | 0 | 1 Ref      |
| MZ020222 | Unassigned | Unassigned | Unassigned | 837_0   | Clustered           | 29 VC_837_0   | 29  | 0.9955 | 1          | 0.9955 | 0 | 0 | 0 | 1 Ref      |
| MZ028625 | Unassigned | Unassigned | Unassigned | 224_0   | Clustered           | 19 VC_224_0   | 19  | 0.9416 | 1          | 0.9416 | 0 | 0 | 0 | 1 Ref      |
| MZ028626 | Unassigned | Unassigned | Unassigned | 558_20  | Clustered           | 17 VC_558_20  | 17  | 0.054  | 1          | 0.054  | 0 | 0 | 0 | 0.9926 Ref |
| MZ028628 | Unassigned | Unassigned | Unassigned | 1344_0  | Clustered           | 78 VC_1344_0  | 78  | 0.9732 | 1          | 0.9732 | 0 | 0 | 0 | 1 Ref      |
| MZ031013 | Unassigned | Unassigned | Unassigned | 452_0   | Clustered           | 66 VC_452_0   | 66  | 0.9248 | 1          | 0.9248 | 0 | 0 | 0 | 1 Ref      |
| MZ042490 | Unassigned | Unassigned | Unassigned | 506_0   | Clustered           | 8 VC_506_0    | 8   | 0.7376 | 1          | 0.7376 | 0 | 0 | 0 | 1 Ref      |
| MZ043613 | Unassigned | Unassigned | Unassigned | 701_1   | Clustered           | 2 VC_701_1    | 2   | 0.1304 | 0.95114164 | 0.124  | 0 | 0 | 0 | 1 Ref      |
| MZ043897 | Unassigned | Unassigned | Unassigned | 30_1    | Clustered           | 16 VC_30_1    | 16  | 0.1973 | 1          | 0.1973 | 0 | 0 | 0 | 0.8333 Ref |
| MZ047271 | Unassigned | Unassigned | Unassigned | 1454_0  | Clustered           | 2 VC_1454_0   | 2   | 0.6937 | 0.85557782 | 0.5935 | 0 | 0 | 0 | 0 Ref      |
| MZ065353 | Unassigned | Unassigned | Unassigned | 283_150 | Clustered/Singleton | 1 VC_283_150  | 1   | 0      | 1          | 0      | 0 | 0 | 0 | 1 Ref      |
| MZ078141 | Unassigned | Unassigned | Unassigned | 1174_0  | Clustered           | 4 VC_1174_0   | 4   | 1      | 1          | 1      | 0 | 0 | 0 | 1 Ref      |
| MZ079855 | Unassigned | Unassigned | Unassigned | 192_1   | Clustered/Singleton | 1 VC_192_1    | 1   | 0      | 1          | 0      | 0 | 0 | 0 | 1 Ref      |
| MZ089728 | Unassigned | Unassigned | Unassigned | 297_0   | Clustered           | 5 VC_297_0    | 5   | 0.1056 | 0.99999993 | 0.1056 | 0 | 0 | 0 | 0.9 Ref    |
| MZ089729 | Unassigned | Unassigned | Unassigned | 80_0    | Clustered           | 41 VC_80_0    | 41  | 0.5837 | 1          | 0.5837 | 0 | 0 | 0 | 0.9805 Ref |
| MZ089731 | Unassigned | Unassigned | Unassigned | 755_0   | Clustered           | 9 VC_755_0    | 9   | 0.4489 | 1          | 0.4489 | 0 | 0 | 0 | 1 Ref      |
| MZ089732 | Unassigned | Unassigned | Unassigned | 472_0   | Clustered           | 47 VC_472_0   | 47  | 0.9025 | 1          | 0.9025 | 0 | 0 | 0 | 1 Ref      |
| MZ089733 | Unassigned | Unassigned | Unassigned | 472_0   | Clustered           | 47 VC_472_0   | 47  | 0.9025 | 1          | 0.9025 | 0 | 0 | 0 | 1 Ref      |
| MZ089734 | Unassigned | Unassigned | Unassigned | 166_0   | Clustered           | 26 VC_166_0   | 26  | 0.7923 | 1          | 0.7923 | 0 | 0 | 0 | 1 Ref      |
| MZ089738 | Unassigned | Unassigned | Unassigned | 472_0   | Clustered           | 47 VC_472_0   | 47  | 0.9025 | 1          | 0.9025 | 0 | 0 | 0 | 1 Ref      |
| MZ089739 | Unassigned | Unassigned | Unassigned | 472_0   | Clustered           | 47 VC_472_0   | 47  | 0.9025 | 1          | 0.9025 | 0 | 0 | 0 | 1 Ref      |
| MZ089740 | Unassigned | Unassigned | Unassigned | 472_0   | Clustered           | 47 VC_472_0   | 47  | 0.9025 | 1          | 0.9025 | 0 | 0 | 0 | 1 Ref      |
| MZ089741 | Unassigned | Unassigned | Unassigned | 166_0   | Clustered           | 26 VC_166_0   | 26  | 0.7923 | 1          | 0.7923 | 0 | 0 | 0 | 1 Ref      |
| MZ089742 | Unassigned | Unassigned | Unassigned | 472_0   | Clustered           | 47 VC_472_0   | 47  | 0.9025 | 1          | 0.9025 | 0 | 0 | 0 | 1 Ref      |
| MZ089747 | Unassigned | Unassigned | Unassigned | 1457_0  | Clustered           | 2 VC_1457_0   | 2   | 1      | 1          | 1      | 0 | 0 | 0 | 1 Ref      |
| MZ089748 | Unassigned | Unassigned | Unassigned | 1457_0  | Clustered           | 2 VC_1457_0   | 2   | 1      | 1          | 1      | 0 | 0 | 0 | 1 Ref      |
| MZ089752 | Unassigned | Unassigned | Unassigned | 1077_0  | Clustered           | 48 VC_1077_0  | 48  | 0.8525 | 1          | 0.8525 | 0 | 0 | 0 | 1 Ref      |
| MZ089755 | Unassigned | Unassigned | Unassigned | 1120_0  | Clustered           | 7 VC_1120_0   | 7   | 0.2688 | 0.9951868  | 0.2675 | 0 | 0 | 0 | 1 Ref      |
| MZ089756 | Unassigned | Unassigned | Unassigned | 1119_0  | Clustered           | 20 VC_1119_0  | 20  | 0.6751 | 0.99997892 | 0.6751 | 0 | 0 | 0 | 1 Ref      |
| MZ089759 | Unassigned | Unassigned | Unassigned | 1120_0  | Clustered           | 7 VC_1120_0   | 7   | 0.2688 | 0.9951868  | 0.2675 | 0 | 0 | 0 | 1 Ref      |
| MZ089761 | Unassigned | Unassigned | Unassigned | 1120_0  | Clustered           | 7 VC_1120_0   | 7   | 0.2688 | 0.9951868  | 0.2675 | 0 | 0 | 0 | 1 Ref      |
| MZ089764 | Unassigned | Unassigned | Unassigned | 1120_0  | Clustered           | 7 VC_1120_0   | 7   | 0.2688 | 0.9951868  | 0.2675 | 0 | 0 | 0 | 1 Ref      |
| MZ089765 | Unassigned | Unassigned | Unassigned | 1104_0  | Clustered           | 154 VC_1104_0 | 154 | 0.8484 | 1          | 0.8484 | 0 | 0 | 0 | 1 Ref      |
| MZ089767 | Unassigned | Unassigned | Unassigned | 1104_0  | Clustered           | 154 VC_1104_0 | 154 | 0.8484 | 1          | 0.8484 | 0 | 0 | 0 | 1 Ref      |
| MZ089768 | Unassigned | Unassigned | Unassigned | 1303_0  | Clustered           | 6 VC_1303_0   | 6   | 1      | 1          | 1      | 0 | 0 | 0 | 1 Ref      |
| MZ089769 | Unassigned | Unassigned | Unassigned | 1458_0  | Clustered           | 2 VC_1458_0   | 2   | 1      | 1          | 1      | 0 | 0 | 0 | 1 Ref      |
| MZ089770 | Unassigned | Unassigned | Unassigned | 1321_0  | Clustered           | 14 VC_1321_0  | 14  | 0.826  | 1          | 0.826  | 0 | 0 | 0 | 1 Ref      |
| MZ089771 | Unassigned | Unassigned | Unassigned | 1110_0  | Clustered           | 8 VC_1110_0   | 8   | 0.6915 | 1          | 0.6915 | 0 | 0 | 0 | 1 Ref      |
| MZ089772 | Unassigned | Unassigned | Unassigned | 1321_0  | Clustered           | 14 VC_1321_0  | 14  | 0.826  | 1          | 0.826  | 0 | 0 | 0 | 1 Ref      |
| MZ089773 | Unassigned | Unassigned | Unassigned | 1119_0  | Clustered           | 20 VC_1119_0  | 20  | 0.6751 | 0.99997892 | 0.6751 | 0 | 0 | 0 | 1 Ref      |
| MZ089774 | Unassigned | Unassigned | Unassigned | 1104_0  | Clustered           | 154 VC_1104_0 | 154 | 0.8484 | 1          | 0.8484 | 0 | 0 | 0 | 1 Ref      |
| MZ089775 | Unassigned | Unassigned | Unassigned | 1104_0  | Clustered           | 154 VC_1104_0 | 154 | 0.8484 | 1          | 0.8484 | 0 | 0 | 0 | 1 Ref      |
| MZ089777 | Unassigned | Unassigned | Unassigned | 1134_0  | Clustered           | 5 VC_1134_0   | 5   | 0.129  | 0.7637089  | 0.0985 | 0 | 0 | 0 | 1 Ref      |
| MZ089778 | Unassigned | Unassigned | Unassigned | 1133_0  | Clustered           | 4 VC_1133_0   | 4   | 0.1253 | 0.975067   | 0.1222 | 0 | 0 | 0 | 1 Ref      |
| MZ089780 | Unassigned | Unassigned | Unassigned | 1321_0  | Clustered           | 14 VC_1321_0  | 14  | 0.826  | 1          | 0.826  | 0 | 0 | 0 | 1 Ref      |
| MZ089783 | Unassigned | Unassigned | Unassigned | 1459_0  | Clustered           | 2 VC_1459_0   | 2   | 1      | 1          | 1      | 0 | 0 | 0 | 1 Ref      |
| MZ089785 | Unassigned | Unassigned | Unassigned | 1231_0  | Clustered           | 2 VC_1231_0   | 2   | 0.4148 | 0.89331315 | 0.3705 | 0 | 0 | 0 | 1 Ref      |
| MZ089786 | Unassigned | Unassigned | Unassigned | 1243_0  | Clustered           | 52 VC_1243_0  | 52  | 0.9126 | 0.92708311 | 0.8461 | 0 | 0 | 0 | 1 Ref      |
| MZ089787 | Unassigned | Unassigned | Unassigned | 1460_0  | Clustered           | 3 VC_1460_0   | 3   | 0.7846 | 0.96173875 | 0.7546 | 0 | 0 | 0 | 1 Ref      |
| MZ089788 | Unassigned | Unassigned | Unassigned | 1460_0  | Clustered           | 3 VC_1460_0   | 3   | 0.7846 | 0.96173875 | 0.7546 | 0 | 0 | 0 | 1 Ref      |
| MZ089789 | Unassigned | Unassigned | Unassigned | 1197_0  | Clustered           | 15 VC_1197_0  | 15  | 0.8991 | 0.76608394 | 0.6888 | 0 | 0 | 0 | 1 Ref      |
| MZ089790 | Unassigned | Unassigned | Unassigned | 1461_0  | Clustered           | 3 VC_1461_0   | 3   | 1      | 1          | 1      | 0 | 0 | 0 | 1 Ref      |
| MZ089791 | Unassigned | Unassigned | Unassigned | 1243_0  | Clustered           | 52 VC_1243_0  | 52  | 0.9126 | 0.92708311 | 0.8461 | 0 | 0 | 0 | 1 Ref      |
| MZ089792 | Unassigned | Unassigned | Unassigned | 1461_0  | Clustered           | 3 VC_1461_0   | 3   | 1      | 1          | 1      | 0 | 0 | 0 | 1 Ref      |
| MZ089794 | Unassigned | Unassigned | Unassigned | 1461_0  | Clustered           | 3 VC_1461_0   | 3   | 1      | 1          | 1      | 0 | 0 | 0 | 1 Ref      |
| MZ089795 | Unassigned | Unassigned | Unassigned | 1243_0  | Clustered           | 52 VC_1243_0  | 52  | 0.9126 | 0.92708311 | 0.8461 | 0 | 0 | 0 | 1 Ref      |
| MZ089796 | Unassigned | Unassigned | Unassigned | 1314_0  | Clustered           | 4 VC_1314_0   | 4   | 0.6744 | 0.9990209  | 0.6738 | 0 | 0 | 0 | 1 Ref      |
| MZ089797 | Unassigned | Unassigned | Unassigned | 1314_0  | Clustered           | 4 VC_1314_0   | 4   | 0.6744 | 0.9990209  | 0.6738 | 0 | 0 | 0 | 1 Ref      |
| MZ089798 | Unassigned | Unassigned | Unassigned | 1313_0  | Clustered           | 13 VC_1313_0  | 13  | 0.8481 | 0.87456432 | 0.7417 | 0 | 0 | 0 | 1 Ref      |
| MZ089799 | Unassigned | Unassigned | Unassigned | 1313_0  | Clustered           | 13 VC_1313_0  | 13  | 0.8481 | 0.87456432 | 0.7417 | 0 | 0 | 0 | 1 Ref      |
| MZ089800 | Unassigned | Unassigned | Unassigned | 1313_0  | Clustered           | 13 VC_1313_0  | 13  | 0.8481 | 0.87456432 | 0.7417 | 0 | 0 | 0 | 1 Ref      |
| MZ089801 | Unassigned | Unassigned | Unassigned | 1313_0  | Clustered           | 13 VC_1313_0  | 13  | 0.8481 | 0.87456432 | 0.7417 | 0 | 0 | 0 | 1 Ref      |
| MZ089802 | Unassigned | Unassigned | Unassigned | 1276_0  | Clustered           | 7 VC_1276_0   | 7   | 0.8695 | 0.99982476 | 0.8693 | 0 | 0 | 0 | 1 Ref      |
| MZ089803 | Unassigned | Unassigned | Unassigned | 1313_0  | Clustered           | 13 VC_1313_0  | 13  | 0.8481 | 0.87456432 | 0.7417 | 0 | 0 | 0 | 1 Ref      |
| MZ089804 | Unassigned | Unassigned | Unassigned | 1304_0  | Clustered           | 7 VC_1304_0   | 7   | 0.7931 | 0.9999998  | 0.7931 | 0 | 0 | 0 | 1 Ref      |
| MZ089805 | Unassigned | Unassigned | Unassigned | 1313_0  | Clustered           | 13 VC_1313_0  | 13  | 0.8481 | 0.87456432 | 0.7417 | 0 | 0 | 0 | 1 Ref      |
| MZ089806 | Unassigned | Unassigned | Unassigned | 1243_0  | Clustered           | 52 VC_1243_0  | 52  | 0.9126 | 0.92708311 | 0.8461 | 0 | 0 | 0 | 1 Ref      |
| MZ089807 | Unassigned | Unassigned | Unassigned | 1304_0  | Clustered           | 7 VC_1304_0   | 7   | 0.7931 | 0.9999998  | 0.7931 | 0 | 0 | 0 | 1 Ref      |
| MZ089808 | Unassigned | Unassigned | Unassigned | 1276_0  | Clustered           | 7 VC_1276_0   | 7   | 0.8695 | 0.99982476 | 0.8693 | 0 | 0 | 0 | 1 Ref      |
| MZ089809 | Unassigned | Unassigned | Unassigned | 1276_0  | Clustered           | 7 VC_1276_0   | 7   | 0.8695 | 0.99982476 | 0.8693 | 0 | 0 | 0 | 1 Ref      |
| MZ089811 | Unassigned | Unassigned | Unassigned | 1462_0  | Clustered           | 4 VC_1462_0   | 4   | 1      | 1          | 1      | 0 | 0 | 0 | 1 Ref      |



|          |            |            |            |         |                     |              |     |        |            |        |   |   |   |            |
|----------|------------|------------|------------|---------|---------------------|--------------|-----|--------|------------|--------|---|---|---|------------|
| MZ089978 | Unassigned | Unassigned | Unassigned | 424_0   | Clustered           | 7 VC_424_0   | 7   | 0.9044 | 0.9998143  | 0.9043 | 0 | 0 | 0 | 1 Ref      |
| MZ089979 | Unassigned | Unassigned | Unassigned | 424_0   | Clustered           | 7 VC_424_0   | 7   | 0.9044 | 0.9998143  | 0.9043 | 0 | 0 | 0 | 1 Ref      |
| MZ090946 | Unassigned | Unassigned | Unassigned | 252_0   | Clustered           | 121 VC_252_0 | 121 | 0.7376 | 1          | 0.7376 | 0 | 0 | 0 | 0.9999 Ref |
| MZ099557 | Unassigned | Unassigned | Unassigned | 699_0   | Clustered           | 71 VC_699_0  | 71  | 0.9352 | 1          | 0.9352 | 0 | 0 | 0 | 1 Ref      |
| MZ127825 | Unassigned | Unassigned | Unassigned | 428_0   | Clustered           | 33 VC_428_0  | 33  | 0.9915 | 1          | 0.9915 | 0 | 0 | 0 | 1 Ref      |
| MZ147816 | Unassigned | Unassigned | Unassigned | 92_0    | Clustered           | 22 VC_92_0   | 22  | 0.5639 | 1          | 0.5639 | 0 | 0 | 0 | 1 Ref      |
| MZ150757 | Unassigned | Unassigned | Unassigned | 283_176 | Clustered/Singleton | 1 VC_283_176 | 1   | 0      | 1          | 0      | 0 | 0 | 0 | 1 Ref      |
| MZ150758 | Unassigned | Unassigned | Unassigned | 329_11  | Clustered           | 15 VC_329_11 | 15  | 0.0791 | 1          | 0.0791 | 0 | 0 | 0 | 0.9333 Ref |
| MZ150782 | Unassigned | Unassigned | Unassigned | 1162_0  | Clustered           | 10 VC_1162_0 | 10  | 0.5715 | 1          | 0.5715 | 0 | 0 | 0 | 1 Ref      |
| MZ150783 | Unassigned | Unassigned | Unassigned | 1100_0  | Clustered           | 2 VC_1100_0  | 2   | 0.1285 | 0.94673154 | 0.1217 | 0 | 0 | 0 | 1 Ref      |
| MZ150784 | Unassigned | Unassigned | Unassigned | 1037_0  | Clustered           | 6 VC_1037_0  | 6   | 0.6798 | 1          | 0.6798 | 0 | 0 | 0 | 1 Ref      |
| MZ150785 | Unassigned | Unassigned | Unassigned | 1176_0  | Clustered           | 41 VC_1176_0 | 41  | 0.9558 | 1          | 0.9558 | 0 | 0 | 0 | 0.9976 Ref |
| MZ150786 | Unassigned | Unassigned | Unassigned | 372_4   | Clustered           | 3 VC_372_4   | 3   | 0.033  | 0.99853257 | 0.0329 | 0 | 0 | 0 | 1 Ref      |
| MZ150788 | Unassigned | Unassigned | Unassigned | 1175_0  | Clustered           | 22 VC_1175_0 | 22  | 0.4562 | 1          | 0.4562 | 0 | 0 | 0 | 1 Ref      |
| MZ150790 | Unassigned | Unassigned | Unassigned | 1440_0  | Clustered           | 4 VC_1440_0  | 4   | 1      | 1          | 1      | 0 | 0 | 0 | 1 Ref      |
| MZ150791 | Unassigned | Unassigned | Unassigned | 1178_0  | Clustered           | 24 VC_1178_0 | 24  | 0.9524 | 1          | 0.9524 | 0 | 0 | 0 | 1 Ref      |
| MZ150792 | Unassigned | Unassigned | Unassigned | 1352_0  | Clustered           | 31 VC_1352_0 | 31  | 0.849  | 1          | 0.849  | 0 | 0 | 0 | 1 Ref      |
| MZ150793 | Unassigned | Unassigned | Unassigned | 919_0   | Clustered           | 39 VC_919_0  | 39  | 0.9069 | 1          | 0.9069 | 0 | 0 | 0 | 1 Ref      |
| MZ152914 | Unassigned | Unassigned | Unassigned | 574_0   | Clustered           | 7 VC_574_0   | 7   | 0.2734 | 1          | 0.2734 | 0 | 0 | 0 | 1 Ref      |
| MZ156567 | Unassigned | Unassigned | Unassigned | 637_0   | Clustered           | 115 VC_637_0 | 115 | 0.731  | 1          | 0.731  | 0 | 0 | 0 | 0.8764 Ref |
| MZ156568 | Unassigned | Unassigned | Unassigned | 637_0   | Clustered           | 115 VC_637_0 | 115 | 0.731  | 1          | 0.731  | 0 | 0 | 0 | 0.8764 Ref |
| MZ156569 | Unassigned | Unassigned | Unassigned | 637_0   | Clustered           | 115 VC_637_0 | 115 | 0.731  | 1          | 0.731  | 0 | 0 | 0 | 0.8764 Ref |
| MZ156570 | Unassigned | Unassigned | Unassigned | 133_35  | Clustered/Singleton | 1 VC_133_35  | 1   | 0      | 1          | 0      | 0 | 0 | 0 | 1 Ref      |
| MZ170040 | Unassigned | Unassigned | Unassigned | 283_75  | Clustered/Singleton | 1 VC_283_75  | 1   | 0      | 1          | 0      | 0 | 0 | 0 | 1 Ref      |
| MZ170041 | Unassigned | Unassigned | Unassigned | 283_77  | Clustered           | 2 VC_283_77  | 2   | 0.0025 | 0.95407419 | 0.0024 | 0 | 0 | 0 | 1 Ref      |
| MZ171370 | Unassigned | Unassigned | Unassigned | 799_1   | Clustered           | 27 VC_799_1  | 27  | 0.8611 | 1          | 0.8611 | 0 | 0 | 0 | 1 Ref      |
| MZ171371 | Unassigned | Unassigned | Unassigned | 1175_0  | Clustered           | 22 VC_1175_0 | 22  | 0.4562 | 1          | 0.4562 | 0 | 0 | 0 | 1 Ref      |
| MZ171372 | Unassigned | Unassigned | Unassigned | 570_0   | Clustered           | 9 VC_570_0   | 9   | 0.499  | 1          | 0.499  | 0 | 0 | 0 | 1 Ref      |
| MZ171373 | Unassigned | Unassigned | Unassigned | 888_0   | Clustered           | 28 VC_888_0  | 28  | 0.5497 | 1          | 0.5497 | 0 | 0 | 0 | 1 Ref      |
| MZ171374 | Unassigned | Unassigned | Unassigned | 525_0   | Clustered           | 25 VC_525_0  | 25  | 0.4597 | 1          | 0.4597 | 0 | 0 | 0 | 1 Ref      |
| MZ171375 | Unassigned | Unassigned | Unassigned | 509_0   | Clustered           | 37 VC_509_0  | 37  | 0.9689 | 1          | 0.9689 | 0 | 0 | 0 | 1 Ref      |
| MZ171376 | Unassigned | Unassigned | Unassigned | 223_0   | Clustered           | 38 VC_223_0  | 38  | 0.9095 | 1          | 0.9095 | 0 | 0 | 0 | 1 Ref      |
| MZ171377 | Unassigned | Unassigned | Unassigned | 761_0   | Clustered           | 67 VC_761_0  | 67  | 0.8947 | 1          | 0.8947 | 0 | 0 | 0 | 1 Ref      |
| MZ171378 | Unassigned | Unassigned | Unassigned | 520_48  | Clustered/Singleton | 1 VC_520_48  | 1   | 0      | 1          | 0      | 0 | 0 | 0 | 1 Ref      |
| MZ171380 | Unassigned | Unassigned | Unassigned | 517_1   | Clustered           | 108 VC_517_1 | 108 | 0.8483 | 1          | 0.8483 | 0 | 0 | 0 | 0.9955 Ref |
| MZ171381 | Unassigned | Unassigned | Unassigned | 509_0   | Clustered           | 37 VC_509_0  | 37  | 0.9689 | 1          | 0.9689 | 0 | 0 | 0 | 1 Ref      |
| MZ172460 | Unassigned | Unassigned | Unassigned | 938_0   | Clustered           | 99 VC_938_0  | 99  | 0.9119 | 1          | 0.9119 | 0 | 0 | 0 | 0.9928 Ref |
| MZ182246 | Unassigned | Unassigned | Unassigned | 695_0   | Clustered           | 48 VC_695_0  | 48  | 0.8162 | 1          | 0.8162 | 0 | 0 | 0 | 1 Ref      |
| MZ182247 | Unassigned | Unassigned | Unassigned | 837_0   | Clustered           | 29 VC_837_0  | 29  | 0.9955 | 1          | 0.9955 | 0 | 0 | 0 | 1 Ref      |
| MZ188976 | Unassigned | Unassigned | Unassigned | 247_0   | Clustered           | 14 VC_247_0  | 14  | 0.9119 | 1          | 0.9119 | 0 | 0 | 0 | 0.967 Ref  |
| MZ189261 | Unassigned | Unassigned | Unassigned | 286_12  | Clustered           | 3 VC_286_12  | 3   | 0.0146 | 0.92328265 | 0.0135 | 0 | 0 | 0 | 1 Ref      |
| MZ189262 | Unassigned | Unassigned | Unassigned | 283_166 | Clustered/Singleton | 1 VC_283_166 | 1   | 0      | 1          | 0      | 0 | 0 | 0 | 1 Ref      |
| MZ208805 | Unassigned | Unassigned | Unassigned | 111_0   | Clustered           | 91 VC_111_0  | 91  | 0.9587 | 1          | 0.9587 | 0 | 0 | 0 | 1 Ref      |
| MZ209299 | Unassigned | Unassigned | Unassigned | 520_91  | Clustered/Singleton | 1 VC_520_91  | 1   | 0      | 1          | 0      | 0 | 0 | 0 | 1 Ref      |
| MZ209300 | Unassigned | Unassigned | Unassigned | 802_0   | Clustered           | 17 VC_802_0  | 17  | 0.8025 | 1          | 0.8025 | 0 | 0 | 0 | 1 Ref      |
| MZ209301 | Unassigned | Unassigned | Unassigned | 799_1   | Clustered           | 27 VC_799_1  | 27  | 0.8611 | 1          | 0.8611 | 0 | 0 | 0 | 1 Ref      |
| MZ209302 | Unassigned | Unassigned | Unassigned | 1180_0  | Clustered           | 3 VC_1180_0  | 3   | 0.5161 | 0.9981786  | 0.5151 | 0 | 0 | 0 | 1 Ref      |
| MZ209303 | Unassigned | Unassigned | Unassigned | 1164_0  | Clustered           | 25 VC_1164_0 | 25  | 0.7312 | 1          | 0.7312 | 0 | 0 | 0 | 1 Ref      |
| MZ209304 | Unassigned | Unassigned | Unassigned | 1344_0  | Clustered           | 78 VC_1344_0 | 78  | 0.9732 | 1          | 0.9732 | 0 | 0 | 0 | 1 Ref      |
| MZ209305 | Unassigned | Unassigned | Unassigned | 216_5   | Clustered           | 2 VC_216_5   | 2   | 0.0094 | 0.95747812 | 0.009  | 0 | 0 | 0 | 1 Ref      |
| MZ209306 | Unassigned | Unassigned | Unassigned | 556_0   | Clustered           | 21 VC_556_0  | 21  | 0.9912 | 1          | 0.9912 | 0 | 0 | 0 | 1 Ref      |
| MZ209307 | Unassigned | Unassigned | Unassigned | 802_0   | Clustered           | 17 VC_802_0  | 17  | 0.8025 | 1          | 0.8025 | 0 | 0 | 0 | 1 Ref      |
| MZ220766 | Unassigned | Unassigned | Unassigned | 392_0   | Clustered           | 126 VC_392_0 | 126 | 0.9621 | 1          | 0.9621 | 0 | 0 | 0 | 1 Ref      |
| MZ221764 | Unassigned | Unassigned | Unassigned | 938_0   | Clustered           | 99 VC_938_0  | 99  | 0.9119 | 1          | 0.9119 | 0 | 0 | 0 | 0.9928 Ref |
| MZ223858 | Unassigned | Unassigned | Unassigned | 451_0   | Clustered           | 80 VC_451_0  | 80  | 0.9991 | 1          | 0.9991 | 0 | 0 | 0 | 1 Ref      |
| MZ230992 | Unassigned | Unassigned | Unassigned | 1359_0  | Clustered           | 11 VC_1359_0 | 11  | 1      | 0          | 0      | 0 | 0 | 0 | 1 Ref      |
| MZ230993 | Unassigned | Unassigned | Unassigned | 1359_0  | Clustered           | 11 VC_1359_0 | 11  | 1      | 0          | 0      | 0 | 0 | 0 | 1 Ref      |
| MZ230994 | Unassigned | Unassigned | Unassigned | 1359_0  | Clustered           | 11 VC_1359_0 | 11  | 1      | 0          | 0      | 0 | 0 | 0 | 1 Ref      |
| MZ230995 | Unassigned | Unassigned | Unassigned | 1359_0  | Clustered           | 11 VC_1359_0 | 11  | 1      | 0          | 0      | 0 | 0 | 0 | 1 Ref      |
| MZ230996 | Unassigned | Unassigned | Unassigned | 1359_0  | Clustered           | 11 VC_1359_0 | 11  | 1      | 0          | 0      | 0 | 0 | 0 | 1 Ref      |
| MZ230997 | Unassigned | Unassigned | Unassigned | 1359_0  | Clustered           | 11 VC_1359_0 | 11  | 1      | 0          | 0      | 0 | 0 | 0 | 1 Ref      |
| MZ230998 | Unassigned | Unassigned | Unassigned | 1359_0  | Clustered           | 11 VC_1359_0 | 11  | 1      | 0          | 0      | 0 | 0 | 0 | 1 Ref      |
| MZ230999 | Unassigned | Unassigned | Unassigned | 1359_0  | Clustered           | 11 VC_1359_0 | 11  | 1      | 0          | 0      | 0 | 0 | 0 | 1 Ref      |
| MZ231000 | Unassigned | Unassigned | Unassigned | 1359_0  | Clustered           | 11 VC_1359_0 | 11  | 1      | 0          | 0      | 0 | 0 | 0 | 1 Ref      |
| MZ231001 | Unassigned | Unassigned | Unassigned | 1359_0  | Clustered           | 11 VC_1359_0 | 11  | 1      | 0          | 0      | 0 | 0 | 0 | 1 Ref      |
| MZ234008 | Unassigned | Unassigned | Unassigned | 835_0   | Clustered           | 67 VC_835_0  | 67  | 0.9624 | 1          | 0.9624 | 0 | 0 | 0 | 1 Ref      |
| MZ234009 | Unassigned | Unassigned | Unassigned | 451_0   | Clustered           | 80 VC_451_0  | 80  | 0.9991 | 1          | 0.9991 | 0 | 0 | 0 | 1 Ref      |
| MZ234010 | Unassigned | Unassigned | Unassigned | 638_0   | Clustered           | 45 VC_638_0  | 45  | 0.7741 | 1          | 0.7741 | 0 | 0 | 0 | 1 Ref      |
| MZ234011 | Unassigned | Unassigned | Unassigned | 451_0   | Clustered           | 80 VC_451_0  | 80  | 0.9991 | 1          | 0.9991 | 0 | 0 | 0 | 1 Ref      |
| MZ234012 | Unassigned | Unassigned | Unassigned | 452_0   | Clustered           | 66 VC_452_0  | 66  | 0.9248 | 1          | 0.9248 | 0 | 0 | 0 | 1 Ref      |
| MZ234013 | Unassigned | Unassigned | Unassigned | 283_105 | Clustered/Singleton | 1 VC_283_105 | 1   | 0      | 1          | 0      | 0 | 0 | 0 | 1 Ref      |
| MZ234014 | Unassigned | Unassigned | Unassigned | 835_0   | Clustered           | 67 VC_835_0  | 67  | 0.9624 | 1          | 0.9624 | 0 | 0 | 0 | 1 Ref      |
| MZ234015 | Unassigned | Unassigned | Unassigned | 813_0   | Clustered           | 12 VC_813_0  | 12  | 0.2347 | 1          | 0.2347 | 0 | 0 | 0 | 1 Ref      |
| MZ234016 | Unassigned | Unassigned | Unassigned | 835_0   | Clustered           | 67 VC_835_0  | 67  | 0.9624 | 1          | 0.9624 | 0 | 0 | 0 | 1 Ref      |
| MZ234017 | Unassigned | Unassigned | Unassigned | 813_0   | Clustered           | 12 VC_813_0  | 12  | 0.2347 | 1          | 0.2347 | 0 | 0 | 0 | 1 Ref      |
| MZ234018 | Unassigned | Unassigned | Unassigned | 283_40  | Clustered/Singleton | 1 VC_283_40  | 1   | 0      | 1          | 0      | 0 | 0 | 0 | 1 Ref      |
| MZ234019 | Unassigned | Unassigned | Unassigned | 452_0   | Clustered           | 66 VC_452_0  | 66  | 0.9248 | 1          | 0.9248 | 0 | 0 | 0 | 1 Ref      |
| MZ234020 | Unassigned | Unassigned | Unassigned | 452_0   | Clustered           | 66 VC_452_0  | 66  | 0.9248 | 1          | 0.9248 | 0 | 0 | 0 | 1 Ref      |
| MZ234021 | Unassigned | Unassigned | Unassigned | 451_0   | Clustered           | 80 VC_451_0  | 80  | 0.9991 | 1          | 0.9991 | 0 | 0 | 0 | 1 Ref      |
| MZ234022 | Unassigned | Unassigned | Unassigned | 451_0   | Clustered           | 80 VC_451_0  | 80  | 0.9991 | 1          | 0.9991 | 0 | 0 | 0 | 1 Ref      |
| MZ234023 | Unassigned | Unassigned | Unassigned | 451_0   | Clustered           | 80 VC_451_0  | 80  | 0.9991 | 1          | 0.9991 | 0 | 0 | 0 | 1 Ref      |



|          |            |            |            |         |                     |              |     |        |             |        |   |   |   |            |
|----------|------------|------------|------------|---------|---------------------|--------------|-----|--------|-------------|--------|---|---|---|------------|
| MZ234024 | Unassigned | Unassigned | Unassigned | 451_0   | Clustered           | 80 VC_451_0  | 80  | 0.9991 | 1           | 0.9991 | 0 | 0 | 0 | 1 Ref      |
| MZ234025 | Unassigned | Unassigned | Unassigned | 286_1   | Clustered           | 21 VC_286_1  | 21  | 0.1696 | 1           | 0.1696 | 0 | 0 | 0 | 0.9048 Ref |
| MZ234026 | Unassigned | Unassigned | Unassigned | 835_0   | Clustered           | 67 VC_835_0  | 67  | 0.9624 | 1           | 0.9624 | 0 | 0 | 0 | 1 Ref      |
| MZ234027 | Unassigned | Unassigned | Unassigned | 283_78  | Clustered           | 13 VC_283_78 | 13  | 0.035  | 1           | 0.035  | 0 | 0 | 0 | 0.7949 Ref |
| MZ234028 | Unassigned | Unassigned | Unassigned | 813_1   | Clustered           | 24 VC_813_1  | 24  | 0.535  | 1           | 0.535  | 0 | 0 | 0 | 1 Ref      |
| MZ234029 | Unassigned | Unassigned | Unassigned | 835_0   | Clustered           | 67 VC_835_0  | 67  | 0.9624 | 1           | 0.9624 | 0 | 0 | 0 | 1 Ref      |
| MZ234030 | Unassigned | Unassigned | Unassigned | 283_78  | Clustered           | 13 VC_283_78 | 13  | 0.035  | 1           | 0.035  | 0 | 0 | 0 | 0.7949 Ref |
| MZ234031 | Unassigned | Unassigned | Unassigned | 283_117 | Clustered           | 3 VC_283_117 | 3   | 0.0053 | 0.99752037  | 0.0053 | 0 | 0 | 0 | 1 Ref      |
| MZ234032 | Unassigned | Unassigned | Unassigned | 452_0   | Clustered           | 66 VC_452_0  | 66  | 0.9248 | 1           | 0.9248 | 0 | 0 | 0 | 1 Ref      |
| MZ234033 | Unassigned | Unassigned | Unassigned | 942_0   | Clustered           | 36 VC_942_0  | 36  | 0.7848 | 1           | 0.7848 | 0 | 0 | 0 | 1 Ref      |
| MZ234034 | Unassigned | Unassigned | Unassigned | 283_78  | Clustered           | 13 VC_283_78 | 13  | 0.035  | 1           | 0.035  | 0 | 0 | 0 | 0.7949 Ref |
| MZ234035 | Unassigned | Unassigned | Unassigned | 283_117 | Clustered           | 3 VC_283_117 | 3   | 0.0053 | 0.99752037  | 0.0053 | 0 | 0 | 0 | 1 Ref      |
| MZ234036 | Unassigned | Unassigned | Unassigned | 283_78  | Clustered           | 13 VC_283_78 | 13  | 0.035  | 1           | 0.035  | 0 | 0 | 0 | 0.7949 Ref |
| MZ234037 | Unassigned | Unassigned | Unassigned | 283_78  | Clustered           | 13 VC_283_78 | 13  | 0.035  | 1           | 0.035  | 0 | 0 | 0 | 0.7949 Ref |
| MZ234038 | Unassigned | Unassigned | Unassigned | 283_117 | Clustered           | 3 VC_283_117 | 3   | 0.0053 | 0.99752037  | 0.0053 | 0 | 0 | 0 | 1 Ref      |
| MZ234039 | Unassigned | Unassigned | Unassigned | 283_78  | Clustered           | 13 VC_283_78 | 13  | 0.035  | 1           | 0.035  | 0 | 0 | 0 | 0.7949 Ref |
| MZ234040 | Unassigned | Unassigned | Unassigned | 283_78  | Clustered           | 13 VC_283_78 | 13  | 0.035  | 1           | 0.035  | 0 | 0 | 0 | 0.7949 Ref |
| MZ234041 | Unassigned | Unassigned | Unassigned | 283_78  | Clustered           | 13 VC_283_78 | 13  | 0.035  | 1           | 0.035  | 0 | 0 | 0 | 0.7949 Ref |
| MZ234042 | Unassigned | Unassigned | Unassigned | 283_78  | Clustered           | 13 VC_283_78 | 13  | 0.035  | 1           | 0.035  | 0 | 0 | 0 | 0.7949 Ref |
| MZ234043 | Unassigned | Unassigned | Unassigned | 283_78  | Clustered           | 13 VC_283_78 | 13  | 0.035  | 1           | 0.035  | 0 | 0 | 0 | 0.7949 Ref |
| MZ234044 | Unassigned | Unassigned | Unassigned | 451_0   | Clustered           | 80 VC_451_0  | 80  | 0.9991 | 1           | 0.9991 | 0 | 0 | 0 | 1 Ref      |
| MZ234045 | Unassigned | Unassigned | Unassigned | 451_0   | Clustered           | 80 VC_451_0  | 80  | 0.9991 | 1           | 0.9991 | 0 | 0 | 0 | 1 Ref      |
| MZ234046 | Unassigned | Unassigned | Unassigned | 451_0   | Clustered           | 80 VC_451_0  | 80  | 0.9991 | 1           | 0.9991 | 0 | 0 | 0 | 1 Ref      |
| MZ234047 | Unassigned | Unassigned | Unassigned | 451_0   | Clustered           | 80 VC_451_0  | 80  | 0.9991 | 1           | 0.9991 | 0 | 0 | 0 | 1 Ref      |
| MZ234048 | Unassigned | Unassigned | Unassigned | 638_0   | Clustered           | 45 VC_638_0  | 45  | 0.7741 | 1           | 0.7741 | 0 | 0 | 0 | 1 Ref      |
| MZ234049 | Unassigned | Unassigned | Unassigned | 452_0   | Clustered           | 66 VC_452_0  | 66  | 0.9248 | 1           | 0.9248 | 0 | 0 | 0 | 1 Ref      |
| MZ234050 | Unassigned | Unassigned | Unassigned | 452_0   | Clustered           | 66 VC_452_0  | 66  | 0.9248 | 1           | 0.9248 | 0 | 0 | 0 | 1 Ref      |
| MZ234051 | Unassigned | Unassigned | Unassigned | 283_78  | Clustered           | 13 VC_283_78 | 13  | 0.035  | 1           | 0.035  | 0 | 0 | 0 | 0.7949 Ref |
| MZ234052 | Unassigned | Unassigned | Unassigned | 283_78  | Clustered           | 13 VC_283_78 | 13  | 0.035  | 1           | 0.035  | 0 | 0 | 0 | 0.7949 Ref |
| MZ234053 | Unassigned | Unassigned | Unassigned | 283_78  | Clustered           | 13 VC_283_78 | 13  | 0.035  | 1           | 0.035  | 0 | 0 | 0 | 0.7949 Ref |
| MZ272341 | Unassigned | Unassigned | Unassigned | 695_0   | Clustered           | 48 VC_695_0  | 48  | 0.8162 | 1           | 0.8162 | 0 | 0 | 0 | 1 Ref      |
| MZ272425 | Unassigned | Unassigned | Unassigned | 637_0   | Clustered           | 115 VC_637_0 | 115 | 0.731  | 1           | 0.731  | 0 | 0 | 0 | 0.8764 Ref |
| MZ274304 | Unassigned | Unassigned | Unassigned | 525_0   | Clustered           | 25 VC_525_0  | 25  | 0.4597 | 1           | 0.4597 | 0 | 0 | 0 | 1 Ref      |
| MZ274305 | Unassigned | Unassigned | Unassigned | 551_2   | Clustered           | 17 VC_551_2  | 17  | 0.0973 | 1           | 0.0973 | 0 | 0 | 0 | 0.9779 Ref |
| MZ274306 | Unassigned | Unassigned | Unassigned | 520_46  | Clustered/Singleton | 1 VC_520_46  | 1   | 0      | 1           | 0      | 0 | 0 | 0 | 1 Ref      |
| MZ274307 | Unassigned | Unassigned | Unassigned | 1344_0  | Clustered           | 78 VC_1344_0 | 78  | 0.9732 | 1           | 0.9732 | 0 | 0 | 0 | 1 Ref      |
| MZ274308 | Unassigned | Unassigned | Unassigned | 1037_0  | Clustered           | 6 VC_1037_0  | 6   | 0.6798 | 1           | 0.6798 | 0 | 0 | 0 | 1 Ref      |
| MZ274309 | Unassigned | Unassigned | Unassigned | 1164_0  | Clustered           | 25 VC_1164_0 | 25  | 0.7312 | 1           | 0.7312 | 0 | 0 | 0 | 1 Ref      |
| MZ285878 | Unassigned | Unassigned | Unassigned | 79_7    | Clustered           | 33 VC_79_7   | 33  | 0.216  | 1           | 0.216  | 0 | 0 | 0 | 0.8409 Ref |
| MZ285879 | Unassigned | Unassigned | Unassigned | 630_0   | Clustered           | 20 VC_630_0  | 20  | 0.8513 | 1           | 0.8513 | 0 | 0 | 0 | 1 Ref      |
| MZ286294 | Unassigned | Unassigned | Unassigned | 201_0   | Clustered           | 3 VC_201_0   | 3   | 0.0998 | 0.69690761  | 0.0695 | 0 | 0 | 0 | 1 Ref      |
| MZ291552 | Unassigned | Unassigned | Unassigned | 283_4   | Clustered           | 5 VC_283_4   | 5   | 0.0112 | 0.99999969  | 0.0112 | 0 | 0 | 0 | 1 Ref      |
| MZ292654 | Unassigned | Unassigned | Unassigned | 495_0   | Clustered           | 39 VC_495_0  | 39  | 0.308  | 1           | 0.308  | 0 | 0 | 0 | 1 Ref      |
| MZ311861 | Unassigned | Unassigned | Unassigned | 451_0   | Clustered           | 80 VC_451_0  | 80  | 0.9991 | 1           | 0.9991 | 0 | 0 | 0 | 1 Ref      |
| MZ311862 | Unassigned | Unassigned | Unassigned | 451_0   | Clustered           | 80 VC_451_0  | 80  | 0.9991 | 1           | 0.9991 | 0 | 0 | 0 | 1 Ref      |
| MZ311863 | Unassigned | Unassigned | Unassigned | 329_22  | Clustered           | 5 VC_329_22  | 5   | 0.022  | 0.99999994  | 0.022  | 0 | 0 | 0 | 1 Ref      |
| MZ311864 | Unassigned | Unassigned | Unassigned | 582_4   | Clustered           | 3 VC_582_4   | 3   | 0.0348 | 0.98173503  | 0.0341 | 0 | 0 | 0 | 1 Ref      |
| MZ311865 | Unassigned | Unassigned | Unassigned | 286_13  | Clustered           | 10 VC_286_13 | 10  | 0.0698 | 0.999999929 | 0.0698 | 0 | 0 | 0 | 0.9556 Ref |
| MZ318361 | Unassigned | Unassigned | Unassigned | 392_0   | Clustered           | 126 VC_392_0 | 126 | 0.9621 | 1           | 0.9621 | 0 | 0 | 0 | 1 Ref      |
| MZ318362 | Unassigned | Unassigned | Unassigned | 392_0   | Clustered           | 126 VC_392_0 | 126 | 0.9621 | 1           | 0.9621 | 0 | 0 | 0 | 1 Ref      |
| MZ318363 | Unassigned | Unassigned | Unassigned | 392_0   | Clustered           | 126 VC_392_0 | 126 | 0.9621 | 1           | 0.9621 | 0 | 0 | 0 | 1 Ref      |
| MZ318367 | Unassigned | Unassigned | Unassigned | 460_0   | Clustered           | 19 VC_460_0  | 19  | 0.3744 | 1           | 0.3744 | 0 | 0 | 0 | 1 Ref      |
| MZ322004 | Unassigned | Unassigned | Unassigned | 325_35  | Clustered           | 17 VC_325_35 | 17  | 0.0732 | 1           | 0.0732 | 0 | 0 | 0 | 0.7721 Ref |
| MZ322006 | Unassigned | Unassigned | Unassigned | 1344_0  | Clustered           | 78 VC_1344_0 | 78  | 0.9732 | 1           | 0.9732 | 0 | 0 | 0 | 1 Ref      |
| MZ322007 | Unassigned | Unassigned | Unassigned | 223_0   | Clustered           | 38 VC_223_0  | 38  | 0.9095 | 1           | 0.9095 | 0 | 0 | 0 | 1 Ref      |
| MZ322008 | Unassigned | Unassigned | Unassigned | 1344_0  | Clustered           | 78 VC_1344_0 | 78  | 0.9732 | 1           | 0.9732 | 0 | 0 | 0 | 1 Ref      |
| MZ322009 | Unassigned | Unassigned | Unassigned | 1095_0  | Clustered           | 16 VC_1095_0 | 16  | 0.458  | 1           | 0.458  | 0 | 0 | 0 | 1 Ref      |
| MZ322010 | Unassigned | Unassigned | Unassigned | 767_0   | Clustered           | 34 VC_767_0  | 34  | 0.9173 | 1           | 0.9173 | 0 | 0 | 0 | 1 Ref      |
| MZ322011 | Unassigned | Unassigned | Unassigned | 1171_0  | Clustered           | 21 VC_1171_0 | 21  | 0.7125 | 1           | 0.7125 | 0 | 0 | 0 | 1 Ref      |
| MZ322012 | Unassigned | Unassigned | Unassigned | 1234_0  | Clustered           | 44 VC_1234_0 | 44  | 1      | 1           | 1      | 0 | 0 | 0 | 1 Ref      |
| MZ322013 | Unassigned | Unassigned | Unassigned | 919_0   | Clustered           | 39 VC_919_0  | 39  | 0.9069 | 1           | 0.9069 | 0 | 0 | 0 | 1 Ref      |
| MZ322014 | Unassigned | Unassigned | Unassigned | 1344_0  | Clustered           | 78 VC_1344_0 | 78  | 0.9732 | 1           | 0.9732 | 0 | 0 | 0 | 1 Ref      |
| MZ322015 | Unassigned | Unassigned | Unassigned | 1093_0  | Clustered           | 40 VC_1093_0 | 40  | 0.8754 | 1           | 0.8754 | 0 | 0 | 0 | 1 Ref      |
| MZ322016 | Unassigned | Unassigned | Unassigned | 238_0   | Clustered           | 17 VC_238_0  | 17  | 0.6109 | 1           | 0.6109 | 0 | 0 | 0 | 1 Ref      |
| MZ322017 | Unassigned | Unassigned | Unassigned | 515_0   | Clustered           | 16 VC_515_0  | 16  | 0.3793 | 1           | 0.3793 | 0 | 0 | 0 | 1 Ref      |
| MZ322018 | Unassigned | Unassigned | Unassigned | 1171_0  | Clustered           | 21 VC_1171_0 | 21  | 0.7125 | 1           | 0.7125 | 0 | 0 | 0 | 1 Ref      |
| MZ322019 | Unassigned | Unassigned | Unassigned | 216_4   | Clustered           | 13 VC_216_4  | 13  | 0.1657 | 1           | 0.1657 | 0 | 0 | 0 | 1 Ref      |
| MZ322020 | Unassigned | Unassigned | Unassigned | 1095_0  | Clustered           | 16 VC_1095_0 | 16  | 0.458  | 1           | 0.458  | 0 | 0 | 0 | 1 Ref      |
| MZ322021 | Unassigned | Unassigned | Unassigned | 955_0   | Clustered           | 3 VC_955_0   | 3   | 0.7745 | 0.99134622  | 0.7678 | 0 | 0 | 0 | 1 Ref      |
| MZ322022 | Unassigned | Unassigned | Unassigned | 767_0   | Clustered           | 34 VC_767_0  | 34  | 0.9173 | 1           | 0.9173 | 0 | 0 | 0 | 1 Ref      |
| MZ322023 | Unassigned | Unassigned | Unassigned | 517_0   | Clustered           | 18 VC_517_0  | 18  | 0.1599 | 1           | 0.1599 | 0 | 0 | 0 | 1 Ref      |
| MZ322024 | Unassigned | Unassigned | Unassigned | 551_7   | Clustered           | 28 VC_551_7  | 28  | 0.1661 | 1           | 0.1661 | 0 | 0 | 0 | 0.8519 Ref |
| MZ322025 | Unassigned | Unassigned | Unassigned | 517_1   | Clustered           | 108 VC_517_1 | 108 | 0.8483 | 1           | 0.8483 | 0 | 0 | 0 | 0.9955 Ref |
| MZ322026 | Unassigned | Unassigned | Unassigned | 1352_0  | Clustered           | 31 VC_1352_0 | 31  | 0.849  | 1           | 0.849  | 0 | 0 | 0 | 1 Ref      |
| MZ322027 | Unassigned | Unassigned | Unassigned | 1344_0  | Clustered           | 78 VC_1344_0 | 78  | 0.9732 | 1           | 0.9732 | 0 | 0 | 0 | 1 Ref      |
| MZ322028 | Unassigned | Unassigned | Unassigned | 685_0   | Clustered           | 16 VC_685_0  | 16  | 0.2972 | 1           | 0.2972 | 0 | 0 | 0 | 0.9167 Ref |
| MZ322895 | Unassigned | Unassigned | Unassigned | 668_0   | Clustered           | 25 VC_668_0  | 25  | 0.5539 | 1           | 0.5539 | 0 | 0 | 0 | 0.96 Ref   |
| MZ326168 | Unassigned | Unassigned | Unassigned | 582_5   | Clustered           | 4 VC_582_5   | 4   | 0.0528 | 0.99935625  | 0.0527 | 0 | 0 | 0 | 0.8333 Ref |
| MZ326855 | Unassigned | Unassigned | Unassigned | 172_0   | Clustered           | 5 VC_172_0   | 5   | 0.3579 | 0.99999997  | 0.3579 | 0 | 0 | 0 | 1 Ref      |
| MZ326856 | Unassigned | Unassigned | Unassigned | 779_3   | Clustered           | 7 VC_779_3   | 7   | 0.0766 | 1           | 0.0766 | 0 | 0 | 0 | 0.7143 Ref |
| MZ326857 | Unassigned | Unassigned | Unassigned | 779_3   | Clustered           | 7 VC_779_3   | 7   | 0.0766 | 1           | 0.0766 | 0 | 0 | 0 | 0.7143 Ref |



|          |            |            |            |        |           |              |     |        |            |        |   |   |   |            |
|----------|------------|------------|------------|--------|-----------|--------------|-----|--------|------------|--------|---|---|---|------------|
| MZ326859 | Unassigned | Unassigned | Unassigned | 671_0  | Clustered | 5 VC_671_0   | 5   | 0.5289 | 0.99999996 | 0.5289 | 0 | 0 | 0 | 1 Ref      |
| MZ326861 | Unassigned | Unassigned | Unassigned | 779_3  | Clustered | 7 VC_779_3   | 7   | 0.0766 | 1          | 0.0766 | 0 | 0 | 0 | 0.7143 Ref |
| MZ326862 | Unassigned | Unassigned | Unassigned | 905_0  | Clustered | 3 VC_905_0   | 3   | 0.3424 | 0.99823775 | 0.3417 | 0 | 0 | 0 | 1 Ref      |
| MZ326863 | Unassigned | Unassigned | Unassigned | 70_0   | Clustered | 27 VC_70_0   | 27  | 0.5981 | 1          | 0.5981 | 0 | 0 | 0 | 0.9886 Ref |
| MZ326864 | Unassigned | Unassigned | Unassigned | 615_0  | Clustered | 2 VC_615_0   | 2   | 0.2668 | 0.94178001 | 0.2513 | 0 | 0 | 0 | 1 Ref      |
| MZ326865 | Unassigned | Unassigned | Unassigned | 695_0  | Clustered | 48 VC_695_0  | 48  | 0.8162 | 1          | 0.8162 | 0 | 0 | 0 | 1 Ref      |
| MZ326866 | Unassigned | Unassigned | Unassigned | 316_0  | Clustered | 3 VC_316_0   | 3   | 0.774  | 0.99820498 | 0.7726 | 0 | 0 | 0 | 1 Ref      |
| MZ326868 | Unassigned | Unassigned | Unassigned | 506_0  | Clustered | 8 VC_506_0   | 8   | 0.7376 | 1          | 0.7376 | 0 | 0 | 0 | 1 Ref      |
| MZ327261 | Unassigned | Unassigned | Unassigned | 329_1  | Clustered | 17 VC_329_1  | 17  | 0.0867 | 1          | 0.0867 | 0 | 0 | 0 | 0.8235 Ref |
| MZ327262 | Unassigned | Unassigned | Unassigned | 329_1  | Clustered | 17 VC_329_1  | 17  | 0.0867 | 1          | 0.0867 | 0 | 0 | 0 | 0.8235 Ref |
| MZ333134 | Unassigned | Unassigned | Unassigned | 744_0  | Clustered | 10 VC_744_0  | 10  | 0.7049 | 1          | 0.7049 | 0 | 0 | 0 | 1 Ref      |
| MZ333135 | Unassigned | Unassigned | Unassigned | 110_0  | Clustered | 4 VC_110_0   | 4   | 0.1143 | 0.99998732 | 0.1143 | 0 | 0 | 0 | 1 Ref      |
| MZ333136 | Unassigned | Unassigned | Unassigned | 744_0  | Clustered | 10 VC_744_0  | 10  | 0.7049 | 1          | 0.7049 | 0 | 0 | 0 | 1 Ref      |
| MZ333457 | Unassigned | Unassigned | Unassigned | 108_0  | Clustered | 33 VC_108_0  | 33  | 0.949  | 1          | 0.949  | 0 | 0 | 0 | 1 Ref      |
| MZ333461 | Unassigned | Unassigned | Unassigned | 695_0  | Clustered | 48 VC_695_0  | 48  | 0.8162 | 1          | 0.8162 | 0 | 0 | 0 | 1 Ref      |
| MZ333462 | Unassigned | Unassigned | Unassigned | 92_0   | Clustered | 22 VC_92_0   | 22  | 0.5639 | 1          | 0.5639 | 0 | 0 | 0 | 1 Ref      |
| MZ334492 | Unassigned | Unassigned | Unassigned | 310_0  | Clustered | 33 VC_310_0  | 33  | 0.8771 | 1          | 0.8771 | 0 | 0 | 0 | 1 Ref      |
| MZ334493 | Unassigned | Unassigned | Unassigned | 310_0  | Clustered | 33 VC_310_0  | 33  | 0.8771 | 1          | 0.8771 | 0 | 0 | 0 | 1 Ref      |
| MZ334494 | Unassigned | Unassigned | Unassigned | 310_0  | Clustered | 33 VC_310_0  | 33  | 0.8771 | 1          | 0.8771 | 0 | 0 | 0 | 1 Ref      |
| MZ334495 | Unassigned | Unassigned | Unassigned | 310_0  | Clustered | 33 VC_310_0  | 33  | 0.8771 | 1          | 0.8771 | 0 | 0 | 0 | 1 Ref      |
| MZ334496 | Unassigned | Unassigned | Unassigned | 310_0  | Clustered | 33 VC_310_0  | 33  | 0.8771 | 1          | 0.8771 | 0 | 0 | 0 | 1 Ref      |
| MZ334497 | Unassigned | Unassigned | Unassigned | 310_0  | Clustered | 33 VC_310_0  | 33  | 0.8771 | 1          | 0.8771 | 0 | 0 | 0 | 1 Ref      |
| MZ334498 | Unassigned | Unassigned | Unassigned | 310_0  | Clustered | 33 VC_310_0  | 33  | 0.8771 | 1          | 0.8771 | 0 | 0 | 0 | 1 Ref      |
| MZ334499 | Unassigned | Unassigned | Unassigned | 310_0  | Clustered | 33 VC_310_0  | 33  | 0.8771 | 1          | 0.8771 | 0 | 0 | 0 | 1 Ref      |
| MZ334500 | Unassigned | Unassigned | Unassigned | 310_0  | Clustered | 33 VC_310_0  | 33  | 0.8771 | 1          | 0.8771 | 0 | 0 | 0 | 1 Ref      |
| MZ334501 | Unassigned | Unassigned | Unassigned | 310_0  | Clustered | 33 VC_310_0  | 33  | 0.8771 | 1          | 0.8771 | 0 | 0 | 0 | 1 Ref      |
| MZ334502 | Unassigned | Unassigned | Unassigned | 310_0  | Clustered | 33 VC_310_0  | 33  | 0.8771 | 1          | 0.8771 | 0 | 0 | 0 | 1 Ref      |
| MZ334503 | Unassigned | Unassigned | Unassigned | 310_0  | Clustered | 33 VC_310_0  | 33  | 0.8771 | 1          | 0.8771 | 0 | 0 | 0 | 1 Ref      |
| MZ334504 | Unassigned | Unassigned | Unassigned | 310_0  | Clustered | 33 VC_310_0  | 33  | 0.8771 | 1          | 0.8771 | 0 | 0 | 0 | 1 Ref      |
| MZ334505 | Unassigned | Unassigned | Unassigned | 310_0  | Clustered | 33 VC_310_0  | 33  | 0.8771 | 1          | 0.8771 | 0 | 0 | 0 | 1 Ref      |
| MZ334506 | Unassigned | Unassigned | Unassigned | 310_0  | Clustered | 33 VC_310_0  | 33  | 0.8771 | 1          | 0.8771 | 0 | 0 | 0 | 1 Ref      |
| MZ334507 | Unassigned | Unassigned | Unassigned | 310_0  | Clustered | 33 VC_310_0  | 33  | 0.8771 | 1          | 0.8771 | 0 | 0 | 0 | 1 Ref      |
| MZ334508 | Unassigned | Unassigned | Unassigned | 310_0  | Clustered | 33 VC_310_0  | 33  | 0.8771 | 1          | 0.8771 | 0 | 0 | 0 | 1 Ref      |
| MZ334509 | Unassigned | Unassigned | Unassigned | 310_0  | Clustered | 33 VC_310_0  | 33  | 0.8771 | 1          | 0.8771 | 0 | 0 | 0 | 1 Ref      |
| MZ334510 | Unassigned | Unassigned | Unassigned | 310_0  | Clustered | 33 VC_310_0  | 33  | 0.8771 | 1          | 0.8771 | 0 | 0 | 0 | 1 Ref      |
| MZ334511 | Unassigned | Unassigned | Unassigned | 310_0  | Clustered | 33 VC_310_0  | 33  | 0.8771 | 1          | 0.8771 | 0 | 0 | 0 | 1 Ref      |
| MZ334512 | Unassigned | Unassigned | Unassigned | 310_0  | Clustered | 33 VC_310_0  | 33  | 0.8771 | 1          | 0.8771 | 0 | 0 | 0 | 1 Ref      |
| MZ334513 | Unassigned | Unassigned | Unassigned | 310_0  | Clustered | 33 VC_310_0  | 33  | 0.8771 | 1          | 0.8771 | 0 | 0 | 0 | 1 Ref      |
| MZ334514 | Unassigned | Unassigned | Unassigned | 310_0  | Clustered | 33 VC_310_0  | 33  | 0.8771 | 1          | 0.8771 | 0 | 0 | 0 | 1 Ref      |
| MZ334515 | Unassigned | Unassigned | Unassigned | 310_0  | Clustered | 33 VC_310_0  | 33  | 0.8771 | 1          | 0.8771 | 0 | 0 | 0 | 1 Ref      |
| MZ334516 | Unassigned | Unassigned | Unassigned | 310_0  | Clustered | 33 VC_310_0  | 33  | 0.8771 | 1          | 0.8771 | 0 | 0 | 0 | 1 Ref      |
| MZ334517 | Unassigned | Unassigned | Unassigned | 311_0  | Clustered | 6 VC_311_0   | 6   | 0.1997 | 1          | 0.1997 | 0 | 0 | 0 | 1 Ref      |
| MZ334518 | Unassigned | Unassigned | Unassigned | 311_0  | Clustered | 6 VC_311_0   | 6   | 0.1997 | 1          | 0.1997 | 0 | 0 | 0 | 1 Ref      |
| MZ334519 | Unassigned | Unassigned | Unassigned | 311_0  | Clustered | 6 VC_311_0   | 6   | 0.1997 | 1          | 0.1997 | 0 | 0 | 0 | 1 Ref      |
| MZ334520 | Unassigned | Unassigned | Unassigned | 311_0  | Clustered | 6 VC_311_0   | 6   | 0.1997 | 1          | 0.1997 | 0 | 0 | 0 | 1 Ref      |
| MZ334523 | Unassigned | Unassigned | Unassigned | 313_1  | Clustered | 3 VC_313_1   | 3   | 0.3511 | 0.99802018 | 0.3504 | 0 | 0 | 0 | 1 Ref      |
| MZ334524 | Unassigned | Unassigned | Unassigned | 313_0  | Clustered | 2 VC_313_0   | 2   | 0.1721 | 0.90744399 | 0.1562 | 0 | 0 | 0 | 1 Ref      |
| MZ334525 | Unassigned | Unassigned | Unassigned | 312_0  | Clustered | 2 VC_312_0   | 2   | 0.0307 | 0.95436427 | 0.0293 | 0 | 0 | 0 | 1 Ref      |
| MZ334526 | Unassigned | Unassigned | Unassigned | 459_0  | Clustered | 3 VC_459_0   | 3   | 0.8542 | 0.99054823 | 0.8461 | 0 | 0 | 0 | 1 Ref      |
| MZ334527 | Unassigned | Unassigned | Unassigned | 1002_0 | Clustered | 2 VC_1002_0  | 2   | 0.1809 | 0.72090768 | 0.1304 | 0 | 0 | 0 | 1 Ref      |
| MZ336020 | Unassigned | Unassigned | Unassigned | 793_0  | Clustered | 12 VC_793_0  | 12  | 0.8531 | 1          | 0.8531 | 0 | 0 | 0 | 1 Ref      |
| MZ342906 | Unassigned | Unassigned | Unassigned | 813_0  | Clustered | 12 VC_813_0  | 12  | 0.2347 | 1          | 0.2347 | 0 | 0 | 0 | 1 Ref      |
| MZ345003 | Unassigned | Unassigned | Unassigned | 125_0  | Clustered | 17 VC_125_0  | 17  | 0.9244 | 1          | 0.9244 | 0 | 0 | 0 | 1 Ref      |
| MZ348421 | Unassigned | Unassigned | Unassigned | 841_0  | Clustered | 10 VC_841_0  | 10  | 0.5997 | 1          | 0.5997 | 0 | 0 | 0 | 1 Ref      |
| MZ348422 | Unassigned | Unassigned | Unassigned | 442_2  | Clustered | 4 VC_442_2   | 4   | 0.0844 | 0.99988129 | 0.0844 | 0 | 0 | 0 | 0.8333 Ref |
| MZ348423 | Unassigned | Unassigned | Unassigned | 490_1  | Clustered | 5 VC_490_1   | 5   | 0.0447 | 0.99999996 | 0.0447 | 0 | 0 | 0 | 1 Ref      |
| MZ348425 | Unassigned | Unassigned | Unassigned | 697_0  | Clustered | 5 VC_697_0   | 5   | 0.8303 | 0.99999971 | 0.8303 | 0 | 0 | 0 | 1 Ref      |
| MZ348426 | Unassigned | Unassigned | Unassigned | 78_3   | Clustered | 11 VC_78_3   | 11  | 0.2572 | 1          | 0.2572 | 0 | 0 | 0 | 1 Ref      |
| MZ355721 | Unassigned | Unassigned | Unassigned | 236_0  | Clustered | 72 VC_236_0  | 72  | 0.8104 | 1          | 0.8104 | 0 | 0 | 0 | 1 Ref      |
| MZ355722 | Unassigned | Unassigned | Unassigned | 325_55 | Clustered | 2 VC_325_55  | 2   | 0.0061 | 0.95750995 | 0.0058 | 0 | 0 | 0 | 1 Ref      |
| MZ355723 | Unassigned | Unassigned | Unassigned | 515_0  | Clustered | 16 VC_515_0  | 16  | 0.3793 | 1          | 0.3793 | 0 | 0 | 0 | 1 Ref      |
| MZ355724 | Unassigned | Unassigned | Unassigned | 856_0  | Clustered | 7 VC_856_0   | 7   | 0.3463 | 1          | 0.3463 | 0 | 0 | 0 | 1 Ref      |
| MZ355725 | Unassigned | Unassigned | Unassigned | 517_1  | Clustered | 108 VC_517_1 | 108 | 0.8483 | 1          | 0.8483 | 0 | 0 | 0 | 0.9955 Ref |
| MZ355726 | Unassigned | Unassigned | Unassigned | 325_39 | Clustered | 2 VC_325_39  | 2   | 0.0045 | 0.95750889 | 0.0043 | 0 | 0 | 0 | 1 Ref      |
| MZ355728 | Unassigned | Unassigned | Unassigned | 216_6  | Clustered | 42 VC_216_6  | 42  | 0.473  | 1          | 0.473  | 0 | 0 | 0 | 0.8351 Ref |
| MZ358387 | Unassigned | Unassigned | Unassigned | 779_0  | Clustered | 37 VC_779_0  | 37  | 0.5682 | 1          | 0.5682 | 0 | 0 | 0 | 1 Ref      |
| MZ359091 | Unassigned | Unassigned | Unassigned | 96_0   | Clustered | 30 VC_96_0   | 30  | 0.718  | 1          | 0.718  | 0 | 0 | 0 | 1 Ref      |
| MZ359670 | Unassigned | Unassigned | Unassigned | 385_0  | Clustered | 51 VC_385_0  | 51  | 0.8754 | 1          | 0.8754 | 0 | 0 | 0 | 1 Ref      |
| MZ361825 | Unassigned | Unassigned | Unassigned | 378_0  | Clustered | 9 VC_378_0   | 9   | 0.7603 | 1          | 0.7603 | 0 | 0 | 0 | 1 Ref      |
| MZ361826 | Unassigned | Unassigned | Unassigned | 378_0  | Clustered | 9 VC_378_0   | 9   | 0.7603 | 1          | 0.7603 | 0 | 0 | 0 | 1 Ref      |
| MZ361827 | Unassigned | Unassigned | Unassigned | 378_0  | Clustered | 9 VC_378_0   | 9   | 0.7603 | 1          | 0.7603 | 0 | 0 | 0 | 1 Ref      |
| MZ364222 | Unassigned | Unassigned | Unassigned | 1066_0 | Clustered | 52 VC_1066_0 | 52  | 0.7682 | 1          | 0.7682 | 0 | 0 | 0 | 1 Ref      |
| MZ364223 | Unassigned | Unassigned | Unassigned | 1066_0 | Clustered | 52 VC_1066_0 | 52  | 0.7682 | 1          | 0.7682 | 0 | 0 | 0 | 1 Ref      |
| MZ364224 | Unassigned | Unassigned | Unassigned | 1077_0 | Clustered | 48 VC_1077_0 | 48  | 0.8525 | 1          | 0.8525 | 0 | 0 | 0 | 1 Ref      |
| MZ364225 | Unassigned | Unassigned | Unassigned | 1077_0 | Clustered | 48 VC_1077_0 | 48  | 0.8525 | 1          | 0.8525 | 0 | 0 | 0 | 1 Ref      |
| MZ364226 | Unassigned | Unassigned | Unassigned | 1000_0 | Clustered | 21 VC_1000_0 | 21  | 0.8437 | 0.99999998 | 0.8437 | 0 | 0 | 0 | 1 Ref      |
| MZ364227 | Unassigned | Unassigned | Unassigned | 1077_0 | Clustered | 48 VC_1077_0 | 48  | 0.8525 | 1          | 0.8525 | 0 | 0 | 0 | 1 Ref      |
| MZ364228 | Unassigned | Unassigned | Unassigned | 995_0  | Clustered | 69 VC_995_0  | 69  | 0.8547 | 1          | 0.8547 | 0 | 0 | 0 | 1 Ref      |
| MZ364231 | Unassigned | Unassigned | Unassigned | 1068_0 | Clustered | 5 VC_1068_0  | 5   | 1      | 1          | 1      | 0 | 0 | 0 | 1 Ref      |
| MZ364232 | Unassigned | Unassigned | Unassigned | 1066_0 | Clustered | 52 VC_1066_0 | 52  | 0.7682 | 1          | 0.7682 | 0 | 0 | 0 | 1 Ref      |
| MZ364233 | Unassigned | Unassigned | Unassigned | 995_0  | Clustered | 69 VC_995_0  | 69  | 0.8547 | 1          | 0.8547 | 0 | 0 | 0 | 1 Ref      |



|          |            |            |            |        |           |              |     |        |            |        |   |   |   |   |            |
|----------|------------|------------|------------|--------|-----------|--------------|-----|--------|------------|--------|---|---|---|---|------------|
| MZ364234 | Unassigned | Unassigned | Unassigned | 1324_0 | Clustered | 4 VC_1324_0  | 4   | 0.6008 | 0.54407361 | 0.3269 | 0 | 0 | 0 | 0 | 1 Ref      |
| MZ364235 | Unassigned | Unassigned | Unassigned | 1463_0 | Clustered | 6 VC_1463_0  | 6   | 1      | 1          | 1      | 0 | 0 | 0 | 0 | 1 Ref      |
| MZ364236 | Unassigned | Unassigned | Unassigned | 1463_0 | Clustered | 6 VC_1463_0  | 6   | 1      | 1          | 1      | 0 | 0 | 0 | 0 | 1 Ref      |
| MZ364238 | Unassigned | Unassigned | Unassigned | 1463_0 | Clustered | 6 VC_1463_0  | 6   | 1      | 1          | 1      | 0 | 0 | 0 | 0 | 1 Ref      |
| MZ364239 | Unassigned | Unassigned | Unassigned | 1463_0 | Clustered | 6 VC_1463_0  | 6   | 1      | 1          | 1      | 0 | 0 | 0 | 0 | 1 Ref      |
| MZ364240 | Unassigned | Unassigned | Unassigned | 995_0  | Clustered | 69 VC_995_0  | 69  | 0.8547 | 1          | 0.8547 | 0 | 0 | 0 | 0 | 1 Ref      |
| MZ364241 | Unassigned | Unassigned | Unassigned | 1000_0 | Clustered | 21 VC_1000_0 | 21  | 0.8437 | 0.99999998 | 0.8437 | 0 | 0 | 0 | 0 | 1 Ref      |
| MZ364242 | Unassigned | Unassigned | Unassigned | 1062_0 | Clustered | 45 VC_1062_0 | 45  | 0.9734 | 0.50949847 | 0.4959 | 0 | 0 | 0 | 0 | 1 Ref      |
| MZ364243 | Unassigned | Unassigned | Unassigned | 995_0  | Clustered | 69 VC_995_0  | 69  | 0.8547 | 1          | 0.8547 | 0 | 0 | 0 | 0 | 1 Ref      |
| MZ364244 | Unassigned | Unassigned | Unassigned | 1000_0 | Clustered | 21 VC_1000_0 | 21  | 0.8437 | 0.99999998 | 0.8437 | 0 | 0 | 0 | 0 | 1 Ref      |
| MZ364245 | Unassigned | Unassigned | Unassigned | 1000_0 | Clustered | 21 VC_1000_0 | 21  | 0.8437 | 0.99999998 | 0.8437 | 0 | 0 | 0 | 0 | 1 Ref      |
| MZ364246 | Unassigned | Unassigned | Unassigned | 1000_0 | Clustered | 21 VC_1000_0 | 21  | 0.8437 | 0.99999998 | 0.8437 | 0 | 0 | 0 | 0 | 1 Ref      |
| MZ364247 | Unassigned | Unassigned | Unassigned | 1000_0 | Clustered | 21 VC_1000_0 | 21  | 0.8437 | 0.99999998 | 0.8437 | 0 | 0 | 0 | 0 | 1 Ref      |
| MZ364248 | Unassigned | Unassigned | Unassigned | 1066_0 | Clustered | 52 VC_1066_0 | 52  | 0.7682 | 1          | 0.7682 | 0 | 0 | 0 | 0 | 1 Ref      |
| MZ364249 | Unassigned | Unassigned | Unassigned | 1000_0 | Clustered | 21 VC_1000_0 | 21  | 0.8437 | 0.99999998 | 0.8437 | 0 | 0 | 0 | 0 | 1 Ref      |
| MZ364250 | Unassigned | Unassigned | Unassigned | 1000_0 | Clustered | 21 VC_1000_0 | 21  | 0.8437 | 0.99999998 | 0.8437 | 0 | 0 | 0 | 0 | 1 Ref      |
| MZ364251 | Unassigned | Unassigned | Unassigned | 1464_0 | Clustered | 3 VC_1464_0  | 3   | 1      | 1          | 1      | 0 | 0 | 0 | 0 | 1 Ref      |
| MZ364252 | Unassigned | Unassigned | Unassigned | 1338_0 | Clustered | 4 VC_1338_0  | 4   | 1      | 1          | 1      | 0 | 0 | 0 | 0 | 1 Ref      |
| MZ364254 | Unassigned | Unassigned | Unassigned | 1066_0 | Clustered | 52 VC_1066_0 | 52  | 0.7682 | 1          | 0.7682 | 0 | 0 | 0 | 0 | 1 Ref      |
| MZ364255 | Unassigned | Unassigned | Unassigned | 1066_0 | Clustered | 52 VC_1066_0 | 52  | 0.7682 | 1          | 0.7682 | 0 | 0 | 0 | 0 | 1 Ref      |
| MZ364256 | Unassigned | Unassigned | Unassigned | 995_0  | Clustered | 69 VC_995_0  | 69  | 0.8547 | 1          | 0.8547 | 0 | 0 | 0 | 0 | 1 Ref      |
| MZ364257 | Unassigned | Unassigned | Unassigned | 1463_0 | Clustered | 6 VC_1463_0  | 6   | 1      | 1          | 1      | 0 | 0 | 0 | 0 | 1 Ref      |
| MZ364258 | Unassigned | Unassigned | Unassigned | 995_0  | Clustered | 69 VC_995_0  | 69  | 0.8547 | 1          | 0.8547 | 0 | 0 | 0 | 0 | 1 Ref      |
| MZ364259 | Unassigned | Unassigned | Unassigned | 995_0  | Clustered | 69 VC_995_0  | 69  | 0.8547 | 1          | 0.8547 | 0 | 0 | 0 | 0 | 1 Ref      |
| MZ364260 | Unassigned | Unassigned | Unassigned | 1000_0 | Clustered | 21 VC_1000_0 | 21  | 0.8437 | 0.99999998 | 0.8437 | 0 | 0 | 0 | 0 | 1 Ref      |
| MZ364261 | Unassigned | Unassigned | Unassigned | 1066_0 | Clustered | 52 VC_1066_0 | 52  | 0.7682 | 1          | 0.7682 | 0 | 0 | 0 | 0 | 1 Ref      |
| MZ364262 | Unassigned | Unassigned | Unassigned | 1066_0 | Clustered | 52 VC_1066_0 | 52  | 0.7682 | 1          | 0.7682 | 0 | 0 | 0 | 0 | 1 Ref      |
| MZ364263 | Unassigned | Unassigned | Unassigned | 1000_0 | Clustered | 21 VC_1000_0 | 21  | 0.8437 | 0.99999998 | 0.8437 | 0 | 0 | 0 | 0 | 1 Ref      |
| MZ364264 | Unassigned | Unassigned | Unassigned | 1066_0 | Clustered | 52 VC_1066_0 | 52  | 0.7682 | 1          | 0.7682 | 0 | 0 | 0 | 0 | 1 Ref      |
| MZ364265 | Unassigned | Unassigned | Unassigned | 1066_0 | Clustered | 52 VC_1066_0 | 52  | 0.7682 | 1          | 0.7682 | 0 | 0 | 0 | 0 | 1 Ref      |
| MZ364266 | Unassigned | Unassigned | Unassigned | 1000_0 | Clustered | 21 VC_1000_0 | 21  | 0.8437 | 0.99999998 | 0.8437 | 0 | 0 | 0 | 0 | 1 Ref      |
| MZ364267 | Unassigned | Unassigned | Unassigned | 995_0  | Clustered | 69 VC_995_0  | 69  | 0.8547 | 1          | 0.8547 | 0 | 0 | 0 | 0 | 1 Ref      |
| MZ364268 | Unassigned | Unassigned | Unassigned | 1066_0 | Clustered | 52 VC_1066_0 | 52  | 0.7682 | 1          | 0.7682 | 0 | 0 | 0 | 0 | 1 Ref      |
| MZ364269 | Unassigned | Unassigned | Unassigned | 1066_0 | Clustered | 52 VC_1066_0 | 52  | 0.7682 | 1          | 0.7682 | 0 | 0 | 0 | 0 | 1 Ref      |
| MZ364270 | Unassigned | Unassigned | Unassigned | 1000_0 | Clustered | 21 VC_1000_0 | 21  | 0.8437 | 0.99999998 | 0.8437 | 0 | 0 | 0 | 0 | 1 Ref      |
| MZ364271 | Unassigned | Unassigned | Unassigned | 1066_0 | Clustered | 52 VC_1066_0 | 52  | 0.7682 | 1          | 0.7682 | 0 | 0 | 0 | 0 | 1 Ref      |
| MZ364272 | Unassigned | Unassigned | Unassigned | 1066_0 | Clustered | 52 VC_1066_0 | 52  | 0.7682 | 1          | 0.7682 | 0 | 0 | 0 | 0 | 1 Ref      |
| MZ364273 | Unassigned | Unassigned | Unassigned | 1066_0 | Clustered | 52 VC_1066_0 | 52  | 0.7682 | 1          | 0.7682 | 0 | 0 | 0 | 0 | 1 Ref      |
| MZ364274 | Unassigned | Unassigned | Unassigned | 995_0  | Clustered | 69 VC_995_0  | 69  | 0.8547 | 1          | 0.8547 | 0 | 0 | 0 | 0 | 1 Ref      |
| MZ364275 | Unassigned | Unassigned | Unassigned | 1066_0 | Clustered | 52 VC_1066_0 | 52  | 0.7682 | 1          | 0.7682 | 0 | 0 | 0 | 0 | 1 Ref      |
| MZ364276 | Unassigned | Unassigned | Unassigned | 1066_0 | Clustered | 52 VC_1066_0 | 52  | 0.7682 | 1          | 0.7682 | 0 | 0 | 0 | 0 | 1 Ref      |
| MZ364277 | Unassigned | Unassigned | Unassigned | 1077_0 | Clustered | 48 VC_1077_0 | 48  | 0.8525 | 1          | 0.8525 | 0 | 0 | 0 | 0 | 1 Ref      |
| MZ364278 | Unassigned | Unassigned | Unassigned | 1066_0 | Clustered | 52 VC_1066_0 | 52  | 0.7682 | 1          | 0.7682 | 0 | 0 | 0 | 0 | 1 Ref      |
| MZ364279 | Unassigned | Unassigned | Unassigned | 1077_0 | Clustered | 48 VC_1077_0 | 48  | 0.8525 | 1          | 0.8525 | 0 | 0 | 0 | 0 | 1 Ref      |
| MZ364280 | Unassigned | Unassigned | Unassigned | 1068_0 | Clustered | 5 VC_1068_0  | 5   | 1      | 1          | 1      | 0 | 0 | 0 | 0 | 1 Ref      |
| MZ364282 | Unassigned | Unassigned | Unassigned | 1464_0 | Clustered | 3 VC_1464_0  | 3   | 1      | 1          | 1      | 0 | 0 | 0 | 0 | 1 Ref      |
| MZ364283 | Unassigned | Unassigned | Unassigned | 1077_0 | Clustered | 48 VC_1077_0 | 48  | 0.8525 | 1          | 0.8525 | 0 | 0 | 0 | 0 | 1 Ref      |
| MZ364284 | Unassigned | Unassigned | Unassigned | 1068_0 | Clustered | 5 VC_1068_0  | 5   | 1      | 1          | 1      | 0 | 0 | 0 | 0 | 1 Ref      |
| MZ364285 | Unassigned | Unassigned | Unassigned | 1077_0 | Clustered | 48 VC_1077_0 | 48  | 0.8525 | 1          | 0.8525 | 0 | 0 | 0 | 0 | 1 Ref      |
| MZ364286 | Unassigned | Unassigned | Unassigned | 1077_0 | Clustered | 48 VC_1077_0 | 48  | 0.8525 | 1          | 0.8525 | 0 | 0 | 0 | 0 | 1 Ref      |
| MZ364289 | Unassigned | Unassigned | Unassigned | 1463_0 | Clustered | 6 VC_1463_0  | 6   | 1      | 1          | 1      | 0 | 0 | 0 | 0 | 1 Ref      |
| MZ364291 | Unassigned | Unassigned | Unassigned | 1077_0 | Clustered | 48 VC_1077_0 | 48  | 0.8525 | 1          | 0.8525 | 0 | 0 | 0 | 0 | 1 Ref      |
| MZ364293 | Unassigned | Unassigned | Unassigned | 1338_0 | Clustered | 4 VC_1338_0  | 4   | 1      | 1          | 1      | 0 | 0 | 0 | 0 | 1 Ref      |
| MZ364294 | Unassigned | Unassigned | Unassigned | 1464_0 | Clustered | 3 VC_1464_0  | 3   | 1      | 1          | 1      | 0 | 0 | 0 | 0 | 1 Ref      |
| MZ368140 | Unassigned | Unassigned | Unassigned | 209_0  | Clustered | 4 VC_209_0   | 4   | 0.1136 | 0.99998779 | 0.1136 | 0 | 0 | 0 | 0 | 1 Ref      |
| MZ369152 | Unassigned | Unassigned | Unassigned | 948_0  | Clustered | 9 VC_948_0   | 9   | 0.5443 | 1          | 0.5443 | 0 | 0 | 0 | 0 | 1 Ref      |
| MZ374361 | Unassigned | Unassigned | Unassigned | 123_0  | Clustered | 23 VC_123_0  | 23  | 0.817  | 1          | 0.817  | 0 | 0 | 0 | 0 | 1 Ref      |
| MZ375232 | Unassigned | Unassigned | Unassigned | 461_0  | Clustered | 96 VC_461_0  | 96  | 0.9307 | 1          | 0.9307 | 0 | 0 | 0 | 0 | 0.9575 Ref |
| MZ375233 | Unassigned | Unassigned | Unassigned | 392_0  | Clustered | 126 VC_392_0 | 126 | 0.9621 | 1          | 0.9621 | 0 | 0 | 0 | 0 | 1 Ref      |
| MZ375234 | Unassigned | Unassigned | Unassigned | 392_0  | Clustered | 126 VC_392_0 | 126 | 0.9621 | 1          | 0.9621 | 0 | 0 | 0 | 0 | 1 Ref      |
| MZ375235 | Unassigned | Unassigned | Unassigned | 392_0  | Clustered | 126 VC_392_0 | 126 | 0.9621 | 1          | 0.9621 | 0 | 0 | 0 | 0 | 1 Ref      |
| MZ375236 | Unassigned | Unassigned | Unassigned | 392_0  | Clustered | 126 VC_392_0 | 126 | 0.9621 | 1          | 0.9621 | 0 | 0 | 0 | 0 | 1 Ref      |
| MZ375237 | Unassigned | Unassigned | Unassigned | 392_0  | Clustered | 126 VC_392_0 | 126 | 0.9621 | 1          | 0.9621 | 0 | 0 | 0 | 0 | 1 Ref      |
| MZ375238 | Unassigned | Unassigned | Unassigned | 392_0  | Clustered | 126 VC_392_0 | 126 | 0.9621 | 1          | 0.9621 | 0 | 0 | 0 | 0 | 1 Ref      |
| MZ375239 | Unassigned | Unassigned | Unassigned | 392_0  | Clustered | 126 VC_392_0 | 126 | 0.9621 | 1          | 0.9621 | 0 | 0 | 0 | 0 | 1 Ref      |
| MZ375240 | Unassigned | Unassigned | Unassigned | 392_0  | Clustered | 126 VC_392_0 | 126 | 0.9621 | 1          | 0.9621 | 0 | 0 | 0 | 0 | 1 Ref      |
| MZ375241 | Unassigned | Unassigned | Unassigned | 392_0  | Clustered | 126 VC_392_0 | 126 | 0.9621 | 1          | 0.9621 | 0 | 0 | 0 | 0 | 1 Ref      |
| MZ375242 | Unassigned | Unassigned | Unassigned | 392_0  | Clustered | 126 VC_392_0 | 126 | 0.9621 | 1          | 0.9621 | 0 | 0 | 0 | 0 | 1 Ref      |
| MZ375243 | Unassigned | Unassigned | Unassigned | 392_0  | Clustered | 126 VC_392_0 | 126 | 0.9621 | 1          | 0.9621 | 0 | 0 | 0 | 0 | 1 Ref      |
| MZ375244 | Unassigned | Unassigned | Unassigned | 392_0  | Clustered | 126 VC_392_0 | 126 | 0.9621 | 1          | 0.9621 | 0 | 0 | 0 | 0 | 1 Ref      |
| MZ375245 | Unassigned | Unassigned | Unassigned | 392_0  | Clustered | 126 VC_392_0 | 126 | 0.9621 | 1          | 0.9621 | 0 | 0 | 0 | 0 | 1 Ref      |
| MZ375246 | Unassigned | Unassigned | Unassigned | 392_0  | Clustered | 126 VC_392_0 | 126 | 0.9621 | 1          | 0.9621 | 0 | 0 | 0 | 0 | 1 Ref      |
| MZ375247 | Unassigned | Unassigned | Unassigned | 392_0  | Clustered | 126 VC_392_0 | 126 | 0.9621 | 1          | 0.9621 | 0 | 0 | 0 | 0 | 1 Ref      |
| MZ375248 | Unassigned | Unassigned | Unassigned | 392_0  | Clustered | 126 VC_392_0 | 126 | 0.9621 | 1          | 0.9621 | 0 | 0 | 0 | 0 | 1 Ref      |
| MZ375249 | Unassigned | Unassigned | Unassigned | 392_0  | Clustered | 126 VC_392_0 | 126 | 0.9621 | 1          | 0.9621 | 0 | 0 | 0 | 0 | 1 Ref      |
| MZ375250 | Unassigned | Unassigned | Unassigned | 392_0  | Clustered | 126 VC_392_0 | 126 | 0.9621 | 1          | 0.9621 | 0 | 0 | 0 | 0 | 1 Ref      |
| MZ375251 | Unassigned | Unassigned | Unassigned | 392_0  | Clustered | 126 VC_392_0 | 126 | 0.9621 | 1          | 0.9621 | 0 | 0 | 0 | 0 | 1 Ref      |
| MZ375252 | Unassigned | Unassigned | Unassigned | 392_0  | Clustered | 126 VC_392_0 | 126 | 0.9621 | 1          | 0.9621 | 0 | 0 | 0 | 0 | 1 Ref      |
| MZ375253 | Unassigned | Unassigned | Unassigned | 392_0  | Clustered | 126 VC_392_0 | 126 | 0.9621 | 1          | 0.9621 | 0 | 0 | 0 | 0 | 1 Ref      |
| MZ375254 | Unassigned | Unassigned | Unassigned | 392_0  | Clustered | 126 VC_392_0 | 126 | 0.9621 | 1          | 0.9621 | 0 | 0 | 0 | 0 | 1 Ref      |
| MZ375255 | Unassigned | Unassigned | Unassigned | 392_0  | Clustered | 126 VC_392_0 | 126 | 0.9621 | 1          | 0.9621 | 0 | 0 | 0 | 0 | 1 Ref      |



[illegible]



|          |            |            |            |         |                     |              |     |        |            |        |   |   |   |        |     |
|----------|------------|------------|------------|---------|---------------------|--------------|-----|--------|------------|--------|---|---|---|--------|-----|
| MZ375337 | Unassigned | Unassigned | Unassigned | 461_0   | Clustered           | 96 VC_461_0  | 96  | 0.9307 | 1          | 0.9307 | 0 | 0 | 0 | 0.9575 | Ref |
| MZ375338 | Unassigned | Unassigned | Unassigned | 461_0   | Clustered           | 96 VC_461_0  | 96  | 0.9307 | 1          | 0.9307 | 0 | 0 | 0 | 0.9575 | Ref |
| MZ375339 | Unassigned | Unassigned | Unassigned | 461_0   | Clustered           | 96 VC_461_0  | 96  | 0.9307 | 1          | 0.9307 | 0 | 0 | 0 | 0.9575 | Ref |
| MZ375340 | Unassigned | Unassigned | Unassigned | 461_0   | Clustered           | 96 VC_461_0  | 96  | 0.9307 | 1          | 0.9307 | 0 | 0 | 0 | 0.9575 | Ref |
| MZ375341 | Unassigned | Unassigned | Unassigned | 461_0   | Clustered           | 96 VC_461_0  | 96  | 0.9307 | 1          | 0.9307 | 0 | 0 | 0 | 0.9575 | Ref |
| MZ375342 | Unassigned | Unassigned | Unassigned | 461_0   | Clustered           | 96 VC_461_0  | 96  | 0.9307 | 1          | 0.9307 | 0 | 0 | 0 | 0.9575 | Ref |
| MZ375343 | Unassigned | Unassigned | Unassigned | 461_0   | Clustered           | 96 VC_461_0  | 96  | 0.9307 | 1          | 0.9307 | 0 | 0 | 0 | 0.9575 | Ref |
| MZ375344 | Unassigned | Unassigned | Unassigned | 461_0   | Clustered           | 96 VC_461_0  | 96  | 0.9307 | 1          | 0.9307 | 0 | 0 | 0 | 0.9575 | Ref |
| MZ375345 | Unassigned | Unassigned | Unassigned | 461_0   | Clustered           | 96 VC_461_0  | 96  | 0.9307 | 1          | 0.9307 | 0 | 0 | 0 | 0.9575 | Ref |
| MZ375346 | Unassigned | Unassigned | Unassigned | 461_0   | Clustered           | 96 VC_461_0  | 96  | 0.9307 | 1          | 0.9307 | 0 | 0 | 0 | 0.9575 | Ref |
| MZ375347 | Unassigned | Unassigned | Unassigned | 461_0   | Clustered           | 96 VC_461_0  | 96  | 0.9307 | 1          | 0.9307 | 0 | 0 | 0 | 0.9575 | Ref |
| MZ375348 | Unassigned | Unassigned | Unassigned | 461_0   | Clustered           | 96 VC_461_0  | 96  | 0.9307 | 1          | 0.9307 | 0 | 0 | 0 | 0.9575 | Ref |
| MZ375349 | Unassigned | Unassigned | Unassigned | 461_0   | Clustered           | 96 VC_461_0  | 96  | 0.9307 | 1          | 0.9307 | 0 | 0 | 0 | 0.9575 | Ref |
| MZ375350 | Unassigned | Unassigned | Unassigned | 461_0   | Clustered           | 96 VC_461_0  | 96  | 0.9307 | 1          | 0.9307 | 0 | 0 | 0 | 0.9575 | Ref |
| MZ375351 | Unassigned | Unassigned | Unassigned | 461_0   | Clustered           | 96 VC_461_0  | 96  | 0.9307 | 1          | 0.9307 | 0 | 0 | 0 | 0.9575 | Ref |
| MZ375352 | Unassigned | Unassigned | Unassigned | 461_0   | Clustered           | 96 VC_461_0  | 96  | 0.9307 | 1          | 0.9307 | 0 | 0 | 0 | 0.9575 | Ref |
| MZ375353 | Unassigned | Unassigned | Unassigned | 461_0   | Clustered           | 96 VC_461_0  | 96  | 0.9307 | 1          | 0.9307 | 0 | 0 | 0 | 0.9575 | Ref |
| MZ375354 | Unassigned | Unassigned | Unassigned | 461_0   | Clustered           | 96 VC_461_0  | 96  | 0.9307 | 1          | 0.9307 | 0 | 0 | 0 | 0.9575 | Ref |
| MZ375355 | Unassigned | Unassigned | Unassigned | 461_0   | Clustered           | 96 VC_461_0  | 96  | 0.9307 | 1          | 0.9307 | 0 | 0 | 0 | 0.9575 | Ref |
| MZ375356 | Unassigned | Unassigned | Unassigned | 283_91  | Clustered           | 11 VC_283_91 | 11  | 0.0285 | 1          | 0.0285 | 0 | 0 | 0 | 1      | Ref |
| MZ375357 | Unassigned | Unassigned | Unassigned | 133_10  | Clustered           | 10 VC_133_10 | 10  | 0.0527 | 1          | 0.0527 | 0 | 0 | 0 | 1      | Ref |
| MZ375358 | Unassigned | Unassigned | Unassigned | 133_10  | Clustered           | 10 VC_133_10 | 10  | 0.0527 | 1          | 0.0527 | 0 | 0 | 0 | 1      | Ref |
| MZ375754 | Unassigned | Unassigned | Unassigned | 3_0     | Clustered           | 17 VC_3_0    | 17  | 0.5639 | 1          | 0.5639 | 0 | 0 | 0 | 1      | Ref |
| MZ384014 | Unassigned | Unassigned | Unassigned | 818_0   | Clustered           | 20 VC_818_0  | 20  | 0.9601 | 1          | 0.9601 | 0 | 0 | 0 | 1      | Ref |
| MZ388551 | Unassigned | Unassigned | Unassigned | 558_58  | Clustered/Singleton | 1 VC_558_58  | 1   | 0      | 1          | 0      | 0 | 0 | 0 | 1      | Ref |
| MZ388552 | Unassigned | Unassigned | Unassigned | 1181_1  | Clustered           | 10 VC_1181_1 | 10  | 0.5828 | 1          | 0.5828 | 0 | 0 | 0 | 1      | Ref |
| MZ388553 | Unassigned | Unassigned | Unassigned | 557_1   | Clustered           | 11 VC_557_1  | 11  | 0.4945 | 1          | 0.4945 | 0 | 0 | 0 | 0.7818 | Ref |
| MZ388554 | Unassigned | Unassigned | Unassigned | 1360_0  | Clustered           | 31 VC_1360_0 | 31  | 0.8837 | 1          | 0.8837 | 0 | 0 | 0 | 1      | Ref |
| MZ388556 | Unassigned | Unassigned | Unassigned | 799_1   | Clustered           | 27 VC_799_1  | 27  | 0.8611 | 1          | 0.8611 | 0 | 0 | 0 | 1      | Ref |
| MZ394712 | Unassigned | Unassigned | Unassigned | 779_0   | Clustered           | 37 VC_779_0  | 37  | 0.5682 | 1          | 0.5682 | 0 | 0 | 0 | 1      | Ref |
| MZ398021 | Unassigned | Unassigned | Unassigned | 123_0   | Clustered           | 23 VC_123_0  | 23  | 0.817  | 1          | 0.817  | 0 | 0 | 0 | 1      | Ref |
| MZ398135 | Unassigned | Unassigned | Unassigned | 109_0   | Clustered           | 3 VC_109_0   | 3   | 0.1706 | 0.99835623 | 0.1703 | 0 | 0 | 0 | 1      | Ref |
| MZ398136 | Unassigned | Unassigned | Unassigned | 109_0   | Clustered           | 3 VC_109_0   | 3   | 0.1706 | 0.99835623 | 0.1703 | 0 | 0 | 0 | 1      | Ref |
| MZ398240 | Unassigned | Unassigned | Unassigned | 671_0   | Clustered           | 5 VC_671_0   | 5   | 0.5289 | 0.99999996 | 0.5289 | 0 | 0 | 0 | 1      | Ref |
| MZ398241 | Unassigned | Unassigned | Unassigned | 671_0   | Clustered           | 5 VC_671_0   | 5   | 0.5289 | 0.99999996 | 0.5289 | 0 | 0 | 0 | 1      | Ref |
| MZ398242 | Unassigned | Unassigned | Unassigned | 938_0   | Clustered           | 99 VC_938_0  | 99  | 0.9119 | 1          | 0.9119 | 0 | 0 | 0 | 0.9928 | Ref |
| MZ398243 | Unassigned | Unassigned | Unassigned | 813_0   | Clustered           | 12 VC_813_0  | 12  | 0.2347 | 1          | 0.2347 | 0 | 0 | 0 | 1      | Ref |
| MZ398244 | Unassigned | Unassigned | Unassigned | 452_0   | Clustered           | 66 VC_452_0  | 66  | 0.9248 | 1          | 0.9248 | 0 | 0 | 0 | 1      | Ref |
| MZ398245 | Unassigned | Unassigned | Unassigned | 123_0   | Clustered           | 23 VC_123_0  | 23  | 0.817  | 1          | 0.817  | 0 | 0 | 0 | 1      | Ref |
| MZ398246 | Unassigned | Unassigned | Unassigned | 190_24  | Clustered           | 5 VC_190_24  | 5   | 0.0293 | 0.99999996 | 0.0293 | 0 | 0 | 0 | 0.7    | Ref |
| MZ398247 | Unassigned | Unassigned | Unassigned | 451_0   | Clustered           | 80 VC_451_0  | 80  | 0.9991 | 1          | 0.9991 | 0 | 0 | 0 | 1      | Ref |
| MZ398248 | Unassigned | Unassigned | Unassigned | 506_0   | Clustered           | 8 VC_506_0   | 8   | 0.7376 | 1          | 0.7376 | 0 | 0 | 0 | 1      | Ref |
| MZ399596 | Unassigned | Unassigned | Unassigned | 109_0   | Clustered           | 3 VC_109_0   | 3   | 0.1706 | 0.99835623 | 0.1703 | 0 | 0 | 0 | 1      | Ref |
| MZ401005 | Unassigned | Unassigned | Unassigned | 898_0   | Clustered           | 10 VC_898_0  | 10  | 0.7284 | 1          | 0.7284 | 0 | 0 | 0 | 1      | Ref |
| MZ401006 | Unassigned | Unassigned | Unassigned | 815_0   | Clustered           | 8 VC_815_0   | 8   | 0.9801 | 1          | 0.9801 | 0 | 0 | 0 | 1      | Ref |
| MZ401007 | Unassigned | Unassigned | Unassigned | 898_0   | Clustered           | 10 VC_898_0  | 10  | 0.7284 | 1          | 0.7284 | 0 | 0 | 0 | 1      | Ref |
| MZ401008 | Unassigned | Unassigned | Unassigned | 898_0   | Clustered           | 10 VC_898_0  | 10  | 0.7284 | 1          | 0.7284 | 0 | 0 | 0 | 1      | Ref |
| MZ401009 | Unassigned | Unassigned | Unassigned | 898_0   | Clustered           | 10 VC_898_0  | 10  | 0.7284 | 1          | 0.7284 | 0 | 0 | 0 | 1      | Ref |
| MZ402608 | Unassigned | Unassigned | Unassigned | 956_0   | Clustered           | 39 VC_956_0  | 39  | 1      | 1          | 1      | 0 | 0 | 0 | 1      | Ref |
| MZ417315 | Unassigned | Unassigned | Unassigned | 149_25  | Clustered           | 14 VC_149_25 | 14  | 0.095  | 1          | 0.095  | 0 | 0 | 0 | 0.8791 | Ref |
| MZ417319 | Unassigned | Unassigned | Unassigned | 149_25  | Clustered           | 14 VC_149_25 | 14  | 0.095  | 1          | 0.095  | 0 | 0 | 0 | 0.8791 | Ref |
| MZ417320 | Unassigned | Unassigned | Unassigned | 149_25  | Clustered           | 14 VC_149_25 | 14  | 0.095  | 1          | 0.095  | 0 | 0 | 0 | 0.8791 | Ref |
| MZ417321 | Unassigned | Unassigned | Unassigned | 149_25  | Clustered           | 14 VC_149_25 | 14  | 0.095  | 1          | 0.095  | 0 | 0 | 0 | 0.8791 | Ref |
| MZ417322 | Unassigned | Unassigned | Unassigned | 149_24  | Clustered/Singleton | 1 VC_149_24  | 1   | 0      | 1          | 0      | 0 | 0 | 0 | 1      | Ref |
| MZ417323 | Unassigned | Unassigned | Unassigned | 150_0   | Clustered           | 13 VC_150_0  | 13  | 0.2417 | 1          | 0.2417 | 0 | 0 | 0 | 0.9872 | Ref |
| MZ417325 | Unassigned | Unassigned | Unassigned | 150_0   | Clustered           | 13 VC_150_0  | 13  | 0.2417 | 1          | 0.2417 | 0 | 0 | 0 | 0.9872 | Ref |
| MZ417326 | Unassigned | Unassigned | Unassigned | 152_1   | Clustered/Singleton | 1 VC_152_1   | 1   | 0      | 1          | 0      | 0 | 0 | 0 | 1      | Ref |
| MZ417327 | Unassigned | Unassigned | Unassigned | 149_25  | Clustered           | 14 VC_149_25 | 14  | 0.095  | 1          | 0.095  | 0 | 0 | 0 | 0.8791 | Ref |
| MZ417328 | Unassigned | Unassigned | Unassigned | 149_25  | Clustered           | 14 VC_149_25 | 14  | 0.095  | 1          | 0.095  | 0 | 0 | 0 | 0.8791 | Ref |
| MZ417329 | Unassigned | Unassigned | Unassigned | 151_0   | Clustered           | 6 VC_151_0   | 6   | 0.0735 | 1          | 0.0735 | 0 | 0 | 0 | 1      | Ref |
| MZ417330 | Unassigned | Unassigned | Unassigned | 151_0   | Clustered           | 6 VC_151_0   | 6   | 0.0735 | 1          | 0.0735 | 0 | 0 | 0 | 1      | Ref |
| MZ417331 | Unassigned | Unassigned | Unassigned | 149_26  | Clustered/Singleton | 1 VC_149_26  | 1   | 0      | 1          | 0      | 0 | 0 | 0 | 1      | Ref |
| MZ417332 | Unassigned | Unassigned | Unassigned | 149_25  | Clustered           | 14 VC_149_25 | 14  | 0.095  | 1          | 0.095  | 0 | 0 | 0 | 0.8791 | Ref |
| MZ417336 | Unassigned | Unassigned | Unassigned | 667_0   | Clustered           | 7 VC_667_0   | 7   | 0.4101 | 1          | 0.4101 | 0 | 0 | 0 | 1      | Ref |
| MZ417337 | Unassigned | Unassigned | Unassigned | 149_25  | Clustered           | 14 VC_149_25 | 14  | 0.095  | 1          | 0.095  | 0 | 0 | 0 | 0.8791 | Ref |
| MZ417339 | Unassigned | Unassigned | Unassigned | 667_0   | Clustered           | 7 VC_667_0   | 7   | 0.4101 | 1          | 0.4101 | 0 | 0 | 0 | 1      | Ref |
| MZ417340 | Unassigned | Unassigned | Unassigned | 149_25  | Clustered           | 14 VC_149_25 | 14  | 0.095  | 1          | 0.095  | 0 | 0 | 0 | 0.8791 | Ref |
| MZ417343 | Unassigned | Unassigned | Unassigned | 667_0   | Clustered           | 7 VC_667_0   | 7   | 0.4101 | 1          | 0.4101 | 0 | 0 | 0 | 1      | Ref |
| MZ417344 | Unassigned | Unassigned | Unassigned | 151_0   | Clustered           | 6 VC_151_0   | 6   | 0.0735 | 1          | 0.0735 | 0 | 0 | 0 | 1      | Ref |
| MZ417345 | Unassigned | Unassigned | Unassigned | 149_25  | Clustered           | 14 VC_149_25 | 14  | 0.095  | 1          | 0.095  | 0 | 0 | 0 | 0.8791 | Ref |
| MZ417346 | Unassigned | Unassigned | Unassigned | 149_25  | Clustered           | 14 VC_149_25 | 14  | 0.095  | 1          | 0.095  | 0 | 0 | 0 | 0.8791 | Ref |
| MZ417347 | Unassigned | Unassigned | Unassigned | 149_25  | Clustered           | 14 VC_149_25 | 14  | 0.095  | 1          | 0.095  | 0 | 0 | 0 | 0.8791 | Ref |
| MZ417348 | Unassigned | Unassigned | Unassigned | 667_0   | Clustered           | 7 VC_667_0   | 7   | 0.4101 | 1          | 0.4101 | 0 | 0 | 0 | 1      | Ref |
| MZ417350 | Unassigned | Unassigned | Unassigned | 149_25  | Clustered           | 14 VC_149_25 | 14  | 0.095  | 1          | 0.095  | 0 | 0 | 0 | 0.8791 | Ref |
| MZ417354 | Unassigned | Unassigned | Unassigned | 149_25  | Clustered           | 14 VC_149_25 | 14  | 0.095  | 1          | 0.095  | 0 | 0 | 0 | 0.8791 | Ref |
| MZ417521 | Unassigned | Unassigned | Unassigned | 283_174 | Clustered/Singleton | 1 VC_283_174 | 1   | 0      | 1          | 0      | 0 | 0 | 0 | 1      | Ref |
| MZ420150 | Unassigned | Unassigned | Unassigned | 91_0    | Clustered           | 22 VC_91_0   | 22  | 0.5318 | 1          | 0.5318 | 0 | 0 | 0 | 1      | Ref |
| MZ420230 | Unassigned | Unassigned | Unassigned | 228_0   | Clustered           | 60 VC_228_0  | 60  | 0.942  | 1          | 0.942  | 0 | 0 | 0 | 1      | Ref |
| MZ424863 | Unassigned | Unassigned | Unassigned | 426_1   | Clustered           | 3 VC_426_1   | 3   | 0.1152 | 0.99804615 | 0.1149 | 0 | 0 | 0 | 1      | Ref |
| MZ424864 | Unassigned | Unassigned | Unassigned | 111_0   | Clustered           | 91 VC_111_0  | 91  | 0.9587 | 1          | 0.9587 | 0 | 0 | 0 | 1      | Ref |
| MZ424865 | Unassigned | Unassigned | Unassigned | 823_0   | Clustered           | 124 VC_823_0 | 124 | 0.9492 | 1          | 0.9492 | 0 | 0 | 0 | 1      | Ref |



|          |            |            |            |        |                     |              |    |        |            |        |   |   |   |        |     |
|----------|------------|------------|------------|--------|---------------------|--------------|----|--------|------------|--------|---|---|---|--------|-----|
| MZ427930 | Unassigned | Unassigned | Unassigned | 149_15 | Clustered           | 16 VC_149_15 | 16 | 0.0788 | 1          | 0.0788 | 0 | 0 | 0 | 0.8083 | Ref |
| MZ428221 | Unassigned | Unassigned | Unassigned | 937_0  | Clustered           | 40 VC_937_0  | 40 | 0.6809 | 1          | 0.6809 | 0 | 0 | 0 | 0.9359 | Ref |
| MZ428222 | Unassigned | Unassigned | Unassigned | 938_0  | Clustered           | 99 VC_938_0  | 99 | 0.9119 | 1          | 0.9119 | 0 | 0 | 0 | 0.9928 | Ref |
| MZ428223 | Unassigned | Unassigned | Unassigned | 938_0  | Clustered           | 99 VC_938_0  | 99 | 0.9119 | 1          | 0.9119 | 0 | 0 | 0 | 0.9928 | Ref |
| MZ428224 | Unassigned | Unassigned | Unassigned | 937_0  | Clustered           | 40 VC_937_0  | 40 | 0.6809 | 1          | 0.6809 | 0 | 0 | 0 | 0.9359 | Ref |
| MZ428225 | Unassigned | Unassigned | Unassigned | 938_0  | Clustered           | 99 VC_938_0  | 99 | 0.9119 | 1          | 0.9119 | 0 | 0 | 0 | 0.9928 | Ref |
| MZ428226 | Unassigned | Unassigned | Unassigned | 938_0  | Clustered           | 99 VC_938_0  | 99 | 0.9119 | 1          | 0.9119 | 0 | 0 | 0 | 0.9928 | Ref |
| MZ428227 | Unassigned | Unassigned | Unassigned | 938_0  | Clustered           | 99 VC_938_0  | 99 | 0.9119 | 1          | 0.9119 | 0 | 0 | 0 | 0.9928 | Ref |
| MZ428228 | Unassigned | Unassigned | Unassigned | 938_0  | Clustered           | 99 VC_938_0  | 99 | 0.9119 | 1          | 0.9119 | 0 | 0 | 0 | 0.9928 | Ref |
| MZ428229 | Unassigned | Unassigned | Unassigned | 385_0  | Clustered           | 51 VC_385_0  | 51 | 0.8754 | 1          | 0.8754 | 0 | 0 | 0 | 1      | Ref |
| MZ436830 | Unassigned | Unassigned | Unassigned | 283_32 | Clustered/Singleton | 1 VC_283_32  | 1  | 0      | 1          | 0      | 0 | 0 | 0 | 1      | Ref |
| MZ440881 | Unassigned | Unassigned | Unassigned | 460_0  | Clustered           | 19 VC_460_0  | 19 | 0.3744 | 1          | 0.3744 | 0 | 0 | 0 | 1      | Ref |
| MZ443769 | Unassigned | Unassigned | Unassigned | 67_2   | Clustered           | 2 VC_67_2    | 2  | 0.014  | 0.69357611 | 0.0097 | 0 | 0 | 0 | 1      | Ref |
| MZ443770 | Unassigned | Unassigned | Unassigned | 67_3   | Clustered           | 20 VC_67_3   | 20 | 0.3542 | 1          | 0.3542 | 0 | 0 | 0 | 1      | Ref |
| MZ443771 | Unassigned | Unassigned | Unassigned | 67_3   | Clustered           | 20 VC_67_3   | 20 | 0.3542 | 1          | 0.3542 | 0 | 0 | 0 | 1      | Ref |
| MZ443772 | Unassigned | Unassigned | Unassigned | 67_3   | Clustered           | 20 VC_67_3   | 20 | 0.3542 | 1          | 0.3542 | 0 | 0 | 0 | 1      | Ref |
| MZ443773 | Unassigned | Unassigned | Unassigned | 67_3   | Clustered           | 20 VC_67_3   | 20 | 0.3542 | 1          | 0.3542 | 0 | 0 | 0 | 1      | Ref |
| MZ443774 | Unassigned | Unassigned | Unassigned | 67_3   | Clustered           | 20 VC_67_3   | 20 | 0.3542 | 1          | 0.3542 | 0 | 0 | 0 | 1      | Ref |
| MZ443776 | Unassigned | Unassigned | Unassigned | 67_3   | Clustered           | 20 VC_67_3   | 20 | 0.3542 | 1          | 0.3542 | 0 | 0 | 0 | 1      | Ref |
| MZ443777 | Unassigned | Unassigned | Unassigned | 67_3   | Clustered           | 20 VC_67_3   | 20 | 0.3542 | 1          | 0.3542 | 0 | 0 | 0 | 1      | Ref |
| MZ443778 | Unassigned | Unassigned | Unassigned | 67_3   | Clustered           | 20 VC_67_3   | 20 | 0.3542 | 1          | 0.3542 | 0 | 0 | 0 | 1      | Ref |
| MZ443779 | Unassigned | Unassigned | Unassigned | 67_3   | Clustered           | 20 VC_67_3   | 20 | 0.3542 | 1          | 0.3542 | 0 | 0 | 0 | 1      | Ref |
| MZ443780 | Unassigned | Unassigned | Unassigned | 67_3   | Clustered           | 20 VC_67_3   | 20 | 0.3542 | 1          | 0.3542 | 0 | 0 | 0 | 1      | Ref |
| MZ443782 | Unassigned | Unassigned | Unassigned | 67_3   | Clustered           | 20 VC_67_3   | 20 | 0.3542 | 1          | 0.3542 | 0 | 0 | 0 | 1      | Ref |
| MZ443783 | Unassigned | Unassigned | Unassigned | 67_3   | Clustered           | 20 VC_67_3   | 20 | 0.3542 | 1          | 0.3542 | 0 | 0 | 0 | 1      | Ref |
| MZ443784 | Unassigned | Unassigned | Unassigned | 67_3   | Clustered           | 20 VC_67_3   | 20 | 0.3542 | 1          | 0.3542 | 0 | 0 | 0 | 1      | Ref |
| MZ443785 | Unassigned | Unassigned | Unassigned | 67_3   | Clustered           | 20 VC_67_3   | 20 | 0.3542 | 1          | 0.3542 | 0 | 0 | 0 | 1      | Ref |
| MZ443786 | Unassigned | Unassigned | Unassigned | 67_3   | Clustered           | 20 VC_67_3   | 20 | 0.3542 | 1          | 0.3542 | 0 | 0 | 0 | 1      | Ref |
| MZ443787 | Unassigned | Unassigned | Unassigned | 67_3   | Clustered           | 20 VC_67_3   | 20 | 0.3542 | 1          | 0.3542 | 0 | 0 | 0 | 1      | Ref |
| MZ443788 | Unassigned | Unassigned | Unassigned | 67_3   | Clustered           | 20 VC_67_3   | 20 | 0.3542 | 1          | 0.3542 | 0 | 0 | 0 | 1      | Ref |
| MZ443789 | Unassigned | Unassigned | Unassigned | 67_3   | Clustered           | 20 VC_67_3   | 20 | 0.3542 | 1          | 0.3542 | 0 | 0 | 0 | 1      | Ref |
| MZ444140 | Unassigned | Unassigned | Unassigned | 344_0  | Clustered           | 21 VC_344_0  | 21 | 0.5436 | 1          | 0.5436 | 0 | 0 | 0 | 1      | Ref |
| MZ447863 | Unassigned | Unassigned | Unassigned | 1465_0 | Clustered           | 2 VC_1465_0  | 2  | 1      | 1          | 1      | 0 | 0 | 0 | 1      | Ref |
| MZ456034 | Unassigned | Unassigned | Unassigned | 223_0  | Clustered           | 38 VC_223_0  | 38 | 0.9095 | 1          | 0.9095 | 0 | 0 | 0 | 1      | Ref |
| MZ456035 | Unassigned | Unassigned | Unassigned | 856_0  | Clustered           | 7 VC_856_0   | 7  | 0.3463 | 1          | 0.3463 | 0 | 0 | 0 | 1      | Ref |
| MZ456036 | Unassigned | Unassigned | Unassigned | 508_0  | Clustered           | 32 VC_508_0  | 32 | 0.906  | 1          | 0.906  | 0 | 0 | 0 | 1      | Ref |
| MZ456037 | Unassigned | Unassigned | Unassigned | 1348_0 | Clustered           | 5 VC_1348_0  | 5  | 0.5462 | 0.99999985 | 0.5462 | 0 | 0 | 0 | 1      | Ref |
| MZ462995 | Unassigned | Unassigned | Unassigned | 987_0  | Clustered           | 22 VC_987_0  | 22 | 0.8955 | 1          | 0.8955 | 0 | 0 | 0 | 1      | Ref |
| MZ474488 | Unassigned | Unassigned | Unassigned | 1466_0 | Clustered           | 2 VC_1466_0  | 2  | 1      | 1          | 1      | 0 | 0 | 0 | 1      | Ref |
| MZ474489 | Unassigned | Unassigned | Unassigned | 1466_0 | Clustered           | 2 VC_1466_0  | 2  | 1      | 1          | 1      | 0 | 0 | 0 | 1      | Ref |
| MZ475891 | Unassigned | Unassigned | Unassigned | 67_1   | Clustered           | 8 VC_67_1    | 8  | 0.1067 | 0.99893246 | 0.1065 | 0 | 0 | 0 | 1      | Ref |
| MZ475892 | Unassigned | Unassigned | Unassigned | 67_1   | Clustered           | 8 VC_67_1    | 8  | 0.1067 | 0.99893246 | 0.1065 | 0 | 0 | 0 | 1      | Ref |
| MZ475893 | Unassigned | Unassigned | Unassigned | 67_1   | Clustered           | 8 VC_67_1    | 8  | 0.1067 | 0.99893246 | 0.1065 | 0 | 0 | 0 | 1      | Ref |
| MZ475894 | Unassigned | Unassigned | Unassigned | 67_1   | Clustered           | 8 VC_67_1    | 8  | 0.1067 | 0.99893246 | 0.1065 | 0 | 0 | 0 | 1      | Ref |
| MZ475895 | Unassigned | Unassigned | Unassigned | 67_1   | Clustered           | 8 VC_67_1    | 8  | 0.1067 | 0.99893246 | 0.1065 | 0 | 0 | 0 | 1      | Ref |
| MZ475896 | Unassigned | Unassigned | Unassigned | 67_1   | Clustered           | 8 VC_67_1    | 8  | 0.1067 | 0.99893246 | 0.1065 | 0 | 0 | 0 | 1      | Ref |
| MZ475897 | Unassigned | Unassigned | Unassigned | 67_1   | Clustered           | 8 VC_67_1    | 8  | 0.1067 | 0.99893246 | 0.1065 | 0 | 0 | 0 | 1      | Ref |
| MZ475898 | Unassigned | Unassigned | Unassigned | 67_1   | Clustered           | 8 VC_67_1    | 8  | 0.1067 | 0.99893246 | 0.1065 | 0 | 0 | 0 | 1      | Ref |
| MZ477002 | Unassigned | Unassigned | Unassigned | 701_0  | Clustered           | 2 VC_701_0   | 2  | 0.1487 | 0.95249915 | 0.1417 | 0 | 0 | 0 | 1      | Ref |
| MZ489634 | Unassigned | Unassigned | Unassigned | 461_0  | Clustered           | 96 VC_461_0  | 96 | 0.9307 | 1          | 0.9307 | 0 | 0 | 0 | 0.9575 | Ref |
| MZ496293 | Unassigned | Unassigned | Unassigned | 231_0  | Clustered           | 3 VC_231_0   | 3  | 0.236  | 0.99824503 | 0.2356 | 0 | 0 | 0 | 1      | Ref |
| MZ501046 | Unassigned | Unassigned | Unassigned | 283_41 | Clustered/Singleton | 1 VC_283_41  | 1  | 0      | 1          | 0      | 0 | 0 | 0 | 1      | Ref |
| MZ501047 | Unassigned | Unassigned | Unassigned | 286_0  | Clustered           | 2 VC_286_0   | 2  | 0.0073 | 0.77462993 | 0.0056 | 0 | 0 | 0 | 1      | Ref |
| MZ501048 | Unassigned | Unassigned | Unassigned | 772_11 | Clustered           | 6 VC_772_11  | 6  | 0.0305 | 0.84253803 | 0.0257 | 0 | 0 | 0 | 0.8    | Ref |
| MZ501049 | Unassigned | Unassigned | Unassigned | 779_0  | Clustered           | 37 VC_779_0  | 37 | 0.5682 | 1          | 0.5682 | 0 | 0 | 0 | 1      | Ref |
| MZ501050 | Unassigned | Unassigned | Unassigned | 283_42 | Clustered/Singleton | 1 VC_283_42  | 1  | 0      | 1          | 0      | 0 | 0 | 0 | 1      | Ref |
| MZ501051 | Unassigned | Unassigned | Unassigned | 456_0  | Clustered           | 62 VC_456_0  | 62 | 0.9026 | 1          | 0.9026 | 0 | 0 | 0 | 1      | Ref |
| MZ501052 | Unassigned | Unassigned | Unassigned | 283_9  | Clustered/Singleton | 1 VC_283_9   | 1  | 0      | 1          | 0      | 0 | 0 | 0 | 1      | Ref |
| MZ501053 | Unassigned | Unassigned | Unassigned | 576_0  | Clustered           | 4 VC_576_0   | 4  | 0.0606 | 0.99998766 | 0.0606 | 0 | 0 | 0 | 1      | Ref |
| MZ501054 | Unassigned | Unassigned | Unassigned | 772_19 | Clustered           | 16 VC_772_19 | 16 | 0.0975 | 0.9970466  | 0.0972 | 0 | 0 | 0 | 0.8083 | Ref |
| MZ501055 | Unassigned | Unassigned | Unassigned | 386_0  | Clustered           | 49 VC_386_0  | 49 | 0.7941 | 1          | 0.7941 | 0 | 0 | 0 | 1      | Ref |
| MZ501056 | Unassigned | Unassigned | Unassigned | 286_10 | Clustered           | 9 VC_286_10  | 9  | 0.0615 | 0.99999878 | 0.0615 | 0 | 0 | 0 | 0.6667 | Ref |
| MZ501057 | Unassigned | Unassigned | Unassigned | 722_0  | Clustered           | 13 VC_722_0  | 13 | 0.5104 | 1          | 0.5104 | 0 | 0 | 0 | 1      | Ref |
| MZ501058 | Unassigned | Unassigned | Unassigned | 190_32 | Clustered/Singleton | 1 VC_190_32  | 1  | 0      | 1          | 0      | 0 | 0 | 0 | 1      | Ref |
| MZ501059 | Unassigned | Unassigned | Unassigned | 584_0  | Clustered           | 28 VC_584_0  | 28 | 0.7704 | 1          | 0.7704 | 0 | 0 | 0 | 1      | Ref |
| MZ501060 | Unassigned | Unassigned | Unassigned | 772_2  | Clustered/Singleton | 1 VC_772_2   | 1  | 0      | 1          | 0      | 0 | 0 | 0 | 1      | Ref |
| MZ501061 | Unassigned | Unassigned | Unassigned | 772_18 | Clustered/Singleton | 1 VC_772_18  | 1  | 0      | 1          | 0      | 0 | 0 | 0 | 1      | Ref |
| MZ501062 | Unassigned | Unassigned | Unassigned | 772_19 | Clustered           | 16 VC_772_19 | 16 | 0.0975 | 0.9970466  | 0.0972 | 0 | 0 | 0 | 0.8083 | Ref |
| MZ501063 | Unassigned | Unassigned | Unassigned | 848_0  | Clustered           | 28 VC_848_0  | 28 | 0.7927 | 1          | 0.7927 | 0 | 0 | 0 | 1      | Ref |
| MZ501064 | Unassigned | Unassigned | Unassigned | 386_0  | Clustered           | 49 VC_386_0  | 49 | 0.7941 | 1          | 0.7941 | 0 | 0 | 0 | 1      | Ref |
| MZ501065 | Unassigned | Unassigned | Unassigned | 283_36 | Clustered/Singleton | 1 VC_283_36  | 1  | 0      | 1          | 0      | 0 | 0 | 0 | 1      | Ref |
| MZ501066 | Unassigned | Unassigned | Unassigned | 283_46 | Clustered/Singleton | 1 VC_283_46  | 1  | 0      | 1          | 0      | 0 | 0 | 0 | 1      | Ref |
| MZ501067 | Unassigned | Unassigned | Unassigned | 283_47 | Clustered/Singleton | 1 VC_283_47  | 1  | 0      | 1          | 0      | 0 | 0 | 0 | 1      | Ref |
| MZ501068 | Unassigned | Unassigned | Unassigned | 722_0  | Clustered           | 13 VC_722_0  | 13 | 0.5104 | 1          | 0.5104 | 0 | 0 | 0 | 1      | Ref |
| MZ501069 | Unassigned | Unassigned | Unassigned | 942_0  | Clustered           | 36 VC_942_0  | 36 | 0.7848 | 1          | 0.7848 | 0 | 0 | 0 | 1      | Ref |
| MZ501070 | Unassigned | Unassigned | Unassigned | 835_0  | Clustered           | 67 VC_835_0  | 67 | 0.9624 | 1          | 0.9624 | 0 | 0 | 0 | 1      | Ref |
| MZ501071 | Unassigned | Unassigned | Unassigned | 795_0  | Clustered           | 19 VC_795_0  | 19 | 0.6848 | 1          | 0.6848 | 0 | 0 | 0 | 1      | Ref |
| MZ501072 | Unassigned | Unassigned | Unassigned | 191_18 | Clustered           | 2 VC_191_18  | 2  | 0.0057 | 0.91903589 | 0.0053 | 0 | 0 | 0 | 0      | Ref |
| MZ501073 | Unassigned | Unassigned | Unassigned | 772_17 | Clustered           | 2 VC_772_17  | 2  | 0.006  | 0.57025912 | 0.0034 | 0 | 0 | 0 | 1      | Ref |
| MZ501074 | Unassigned | Unassigned | Unassigned | 190_6  | Clustered/Singleton | 1 VC_190_6   | 1  | 0      | 1          | 0      | 0 | 0 | 0 | 1      | Ref |
| MZ501075 | Unassigned | Unassigned | Unassigned | 190_19 | Clustered/Singleton | 1 VC_190_19  | 1  | 0      | 1          | 0      | 0 | 0 | 0 | 1      | Ref |



|          |            |            |            |         |                     |              |     |        |            |        |   |   |   |            |
|----------|------------|------------|------------|---------|---------------------|--------------|-----|--------|------------|--------|---|---|---|------------|
| MZ501076 | Unassigned | Unassigned | Unassigned | 191_21  | Clustered/Singleton | 1 VC_191_21  | 1   | 0      | 1          | 0      | 0 | 0 | 0 | 1 Ref      |
| MZ501077 | Unassigned | Unassigned | Unassigned | 585_0   | Clustered           | 4 VC_585_0   | 4   | 0.0533 | 0.99998755 | 0.0533 | 0 | 0 | 0 | 1 Ref      |
| MZ501078 | Unassigned | Unassigned | Unassigned | 392_0   | Clustered           | 126 VC_392_0 | 126 | 0.9621 | 1          | 0.9621 | 0 | 0 | 0 | 1 Ref      |
| MZ501079 | Unassigned | Unassigned | Unassigned | 941_0   | Clustered           | 40 VC_941_0  | 40  | 0.6903 | 1          | 0.6903 | 0 | 0 | 0 | 1 Ref      |
| MZ501080 | Unassigned | Unassigned | Unassigned | 456_0   | Clustered           | 62 VC_456_0  | 62  | 0.9026 | 1          | 0.9026 | 0 | 0 | 0 | 1 Ref      |
| MZ501081 | Unassigned | Unassigned | Unassigned | 392_0   | Clustered           | 126 VC_392_0 | 126 | 0.9621 | 1          | 0.9621 | 0 | 0 | 0 | 1 Ref      |
| MZ501082 | Unassigned | Unassigned | Unassigned | 772_10  | Clustered           | 8 VC_772_10  | 8   | 0.0433 | 0.9088183  | 0.0394 | 0 | 0 | 0 | 0.9286 Ref |
| MZ501083 | Unassigned | Unassigned | Unassigned | 772_10  | Clustered           | 8 VC_772_10  | 8   | 0.0433 | 0.9088183  | 0.0394 | 0 | 0 | 0 | 0.9286 Ref |
| MZ501084 | Unassigned | Unassigned | Unassigned | 848_0   | Clustered           | 28 VC_848_0  | 28  | 0.7927 | 1          | 0.7927 | 0 | 0 | 0 | 1 Ref      |
| MZ501085 | Unassigned | Unassigned | Unassigned | 585_0   | Clustered           | 4 VC_585_0   | 4   | 0.0533 | 0.99998755 | 0.0533 | 0 | 0 | 0 | 1 Ref      |
| MZ501086 | Unassigned | Unassigned | Unassigned | 329_3   | Clustered           | 24 VC_329_3  | 24  | 0.1206 | 1          | 0.1206 | 0 | 0 | 0 | 0.7283 Ref |
| MZ501087 | Unassigned | Unassigned | Unassigned | 456_0   | Clustered           | 62 VC_456_0  | 62  | 0.9026 | 1          | 0.9026 | 0 | 0 | 0 | 1 Ref      |
| MZ501088 | Unassigned | Unassigned | Unassigned | 835_0   | Clustered           | 67 VC_835_0  | 67  | 0.9624 | 1          | 0.9624 | 0 | 0 | 0 | 1 Ref      |
| MZ501089 | Unassigned | Unassigned | Unassigned | 283_116 | Clustered/Singleton | 1 VC_283_116 | 1   | 0      | 1          | 0      | 0 | 0 | 0 | 1 Ref      |
| MZ501090 | Unassigned | Unassigned | Unassigned | 941_0   | Clustered           | 40 VC_941_0  | 40  | 0.6903 | 1          | 0.6903 | 0 | 0 | 0 | 1 Ref      |
| MZ501091 | Unassigned | Unassigned | Unassigned | 795_0   | Clustered           | 19 VC_795_0  | 19  | 0.6848 | 1          | 0.6848 | 0 | 0 | 0 | 1 Ref      |
| MZ501092 | Unassigned | Unassigned | Unassigned | 575_0   | Clustered           | 35 VC_575_0  | 35  | 0.8815 | 1          | 0.8815 | 0 | 0 | 0 | 1 Ref      |
| MZ501093 | Unassigned | Unassigned | Unassigned | 772_3   | Clustered/Singleton | 1 VC_772_3   | 1   | 0      | 1          | 0      | 0 | 0 | 0 | 1 Ref      |
| MZ501094 | Unassigned | Unassigned | Unassigned | 772_11  | Clustered           | 6 VC_772_11  | 6   | 0.0305 | 0.84253803 | 0.0257 | 0 | 0 | 0 | 0.8 Ref    |
| MZ501095 | Unassigned | Unassigned | Unassigned | 835_0   | Clustered           | 67 VC_835_0  | 67  | 0.9624 | 1          | 0.9624 | 0 | 0 | 0 | 1 Ref      |
| MZ501096 | Unassigned | Unassigned | Unassigned | 283_147 | Clustered/Singleton | 1 VC_283_147 | 1   | 0      | 1          | 0      | 0 | 0 | 0 | 1 Ref      |
| MZ501097 | Unassigned | Unassigned | Unassigned | 835_0   | Clustered           | 67 VC_835_0  | 67  | 0.9624 | 1          | 0.9624 | 0 | 0 | 0 | 1 Ref      |
| MZ501098 | Unassigned | Unassigned | Unassigned | 283_70  | Clustered/Singleton | 1 VC_283_70  | 1   | 0      | 1          | 0      | 0 | 0 | 0 | 1 Ref      |
| MZ501099 | Unassigned | Unassigned | Unassigned | 585_1   | Clustered           | 3 VC_585_1   | 3   | 0.0313 | 0.99857668 | 0.0312 | 0 | 0 | 0 | 1 Ref      |
| MZ501100 | Unassigned | Unassigned | Unassigned | 848_0   | Clustered           | 28 VC_848_0  | 28  | 0.7927 | 1          | 0.7927 | 0 | 0 | 0 | 1 Ref      |
| MZ501101 | Unassigned | Unassigned | Unassigned | 942_0   | Clustered           | 36 VC_942_0  | 36  | 0.7848 | 1          | 0.7848 | 0 | 0 | 0 | 1 Ref      |
| MZ501102 | Unassigned | Unassigned | Unassigned | 772_10  | Clustered           | 8 VC_772_10  | 8   | 0.0433 | 0.9088183  | 0.0394 | 0 | 0 | 0 | 0.9286 Ref |
| MZ501103 | Unassigned | Unassigned | Unassigned | 190_33  | Clustered/Singleton | 1 VC_190_33  | 1   | 0      | 1          | 0      | 0 | 0 | 0 | 1 Ref      |
| MZ501104 | Unassigned | Unassigned | Unassigned | 795_0   | Clustered           | 19 VC_795_0  | 19  | 0.6848 | 1          | 0.6848 | 0 | 0 | 0 | 1 Ref      |
| MZ501105 | Unassigned | Unassigned | Unassigned | 191_17  | Clustered           | 4 VC_191_17  | 4   | 0.0166 | 0.99930063 | 0.0166 | 0 | 0 | 0 | 0.8333 Ref |
| MZ501106 | Unassigned | Unassigned | Unassigned | 283_50  | Clustered/Singleton | 1 VC_283_50  | 1   | 0      | 1          | 0      | 0 | 0 | 0 | 1 Ref      |
| MZ501107 | Unassigned | Unassigned | Unassigned | 835_0   | Clustered           | 67 VC_835_0  | 67  | 0.9624 | 1          | 0.9624 | 0 | 0 | 0 | 1 Ref      |
| MZ501108 | Unassigned | Unassigned | Unassigned | 191_28  | Clustered/Singleton | 1 VC_191_28  | 1   | 0      | 1          | 0      | 0 | 0 | 0 | 1 Ref      |
| MZ501109 | Unassigned | Unassigned | Unassigned | 191_2   | Clustered/Singleton | 1 VC_191_2   | 1   | 0      | 1          | 0      | 0 | 0 | 0 | 1 Ref      |
| MZ501110 | Unassigned | Unassigned | Unassigned | 795_0   | Clustered           | 19 VC_795_0  | 19  | 0.6848 | 1          | 0.6848 | 0 | 0 | 0 | 1 Ref      |
| MZ501111 | Unassigned | Unassigned | Unassigned | 772_6   | Clustered           | 3 VC_772_6   | 3   | 0.012  | 0.63979507 | 0.0077 | 0 | 0 | 0 | 1 Ref      |
| MZ501112 | Unassigned | Unassigned | Unassigned | 795_0   | Clustered           | 19 VC_795_0  | 19  | 0.6848 | 1          | 0.6848 | 0 | 0 | 0 | 1 Ref      |
| MZ501113 | Unassigned | Unassigned | Unassigned | 283_118 | Clustered           | 3 VC_283_118 | 3   | 0.0054 | 0.99110781 | 0.0053 | 0 | 0 | 0 | 1 Ref      |
| MZ501260 | Unassigned | Unassigned | Unassigned | 85_3    | Clustered           | 19 VC_85_3   | 19  | 0.3671 | 1          | 0.3671 | 0 | 0 | 0 | 0.807 Ref  |
| MZ501261 | Unassigned | Unassigned | Unassigned | 85_3    | Clustered           | 19 VC_85_3   | 19  | 0.3671 | 1          | 0.3671 | 0 | 0 | 0 | 0.807 Ref  |
| MZ501262 | Unassigned | Unassigned | Unassigned | 85_3    | Clustered           | 19 VC_85_3   | 19  | 0.3671 | 1          | 0.3671 | 0 | 0 | 0 | 0.807 Ref  |
| MZ501263 | Unassigned | Unassigned | Unassigned | 85_3    | Clustered           | 19 VC_85_3   | 19  | 0.3671 | 1          | 0.3671 | 0 | 0 | 0 | 0.807 Ref  |
| MZ501265 | Unassigned | Unassigned | Unassigned | 85_3    | Clustered           | 19 VC_85_3   | 19  | 0.3671 | 1          | 0.3671 | 0 | 0 | 0 | 0.807 Ref  |
| MZ501266 | Unassigned | Unassigned | Unassigned | 749_0   | Clustered           | 40 VC_749_0  | 40  | 0.7517 | 1          | 0.7517 | 0 | 0 | 0 | 1 Ref      |
| MZ501267 | Unassigned | Unassigned | Unassigned | 442_2   | Clustered           | 4 VC_442_2   | 4   | 0.0844 | 0.99988129 | 0.0844 | 0 | 0 | 0 | 0.8333 Ref |
| MZ501268 | Unassigned | Unassigned | Unassigned | 489_1   | Clustered           | 11 VC_489_1  | 11  | 0.4621 | 1          | 0.4621 | 0 | 0 | 0 | 1 Ref      |
| MZ501269 | Unassigned | Unassigned | Unassigned | 540_0   | Clustered           | 15 VC_540_0  | 15  | 0.2866 | 1          | 0.2866 | 0 | 0 | 0 | 1 Ref      |
| MZ501270 | Unassigned | Unassigned | Unassigned | 45_0    | Clustered           | 12 VC_45_0   | 12  | 0.35   | 1          | 0.35   | 0 | 0 | 0 | 1 Ref      |
| MZ501272 | Unassigned | Unassigned | Unassigned | 129_0   | Clustered           | 43 VC_129_0  | 43  | 0.886  | 1          | 0.886  | 0 | 0 | 0 | 1 Ref      |
| MZ502379 | Unassigned | Unassigned | Unassigned | 283_1   | Clustered/Singleton | 1 VC_283_1   | 1   | 0      | 1          | 0      | 0 | 0 | 0 | 1 Ref      |
| MZ502380 | Unassigned | Unassigned | Unassigned | 283_164 | Clustered           | 2 VC_283_164 | 2   | 0.003  | 0.93475788 | 0.0028 | 0 | 0 | 0 | 1 Ref      |
| MZ503613 | Unassigned | Unassigned | Unassigned | 417_0   | Clustered           | 5 VC_417_0   | 5   | 0.6629 | 0.9977434  | 0.6614 | 0 | 0 | 0 | 0.8 Ref    |
| MZ504876 | Unassigned | Unassigned | Unassigned | 590_0   | Clustered           | 27 VC_590_0  | 27  | 0.9947 | 1          | 0.9947 | 0 | 0 | 0 | 1 Ref      |
| MZ504877 | Unassigned | Unassigned | Unassigned | 590_0   | Clustered           | 27 VC_590_0  | 27  | 0.9947 | 1          | 0.9947 | 0 | 0 | 0 | 1 Ref      |
| MZ504878 | Unassigned | Unassigned | Unassigned | 590_0   | Clustered           | 27 VC_590_0  | 27  | 0.9947 | 1          | 0.9947 | 0 | 0 | 0 | 1 Ref      |
| MZ504995 | Unassigned | Unassigned | Unassigned | 123_0   | Clustered           | 23 VC_123_0  | 23  | 0.817  | 1          | 0.817  | 0 | 0 | 0 | 1 Ref      |
| MZ514874 | Unassigned | Unassigned | Unassigned | 696_0   | Clustered           | 2 VC_696_0   | 2   | 0.1624 | 0.94573679 | 0.1536 | 0 | 0 | 0 | 1 Ref      |
| MZ516827 | Unassigned | Unassigned | Unassigned | 837_0   | Clustered           | 29 VC_837_0  | 29  | 0.9955 | 1          | 0.9955 | 0 | 0 | 0 | 1 Ref      |
| MZ520832 | Unassigned | Unassigned | Unassigned | 849_1   | Clustered/Singleton | 1 VC_849_1   | 1   | 0      | 1          | 0      | 0 | 0 | 0 | 1 Ref      |
| MZ520833 | Unassigned | Unassigned | Unassigned | 228_0   | Clustered           | 60 VC_228_0  | 60  | 0.942  | 1          | 0.942  | 0 | 0 | 0 | 1 Ref      |
| MZ547449 | Unassigned | Unassigned | Unassigned | 184_0   | Clustered           | 2 VC_184_0   | 2   | 0.7964 | 0.93668477 | 0.746  | 0 | 0 | 0 | 1 Ref      |
| MZ553930 | Unassigned | Unassigned | Unassigned | 79_0    | Clustered           | 64 VC_79_0   | 64  | 0.4185 | 1          | 0.4185 | 0 | 0 | 0 | 0.7649 Ref |
| MZ553931 | Unassigned | Unassigned | Unassigned | 423_0   | Clustered           | 45 VC_423_0  | 45  | 0.9484 | 1          | 0.9484 | 0 | 0 | 0 | 1 Ref      |
| MZ560701 | Unassigned | Unassigned | Unassigned | 286_13  | Clustered           | 10 VC_286_13 | 10  | 0.0698 | 0.99999929 | 0.0698 | 0 | 0 | 0 | 0.9556 Ref |
| MZ560702 | Unassigned | Unassigned | Unassigned | 491_0   | Clustered           | 36 VC_491_0  | 36  | 0.5336 | 1          | 0.5336 | 0 | 0 | 0 | 0.9714 Ref |
| MZ561532 | Unassigned | Unassigned | Unassigned | 290_5   | Clustered           | 14 VC_290_5  | 14  | 0.1422 | 1          | 0.1422 | 0 | 0 | 0 | 0.9231 Ref |
| MZ568826 | Unassigned | Unassigned | Unassigned | 910_0   | Clustered           | 2 VC_910_0   | 2   | 0.9891 | 0.5        | 0.4946 | 0 | 0 | 0 | 1 Ref      |
| MZ568827 | Unassigned | Unassigned | Unassigned | 183_0   | Clustered           | 2 VC_183_0   | 2   | 0.0667 | 0.95489893 | 0.0637 | 0 | 0 | 0 | 1 Ref      |
| MZ568828 | Unassigned | Unassigned | Unassigned | 248_0   | Clustered           | 11 VC_248_0  | 11  | 0.7031 | 1          | 0.7031 | 0 | 0 | 0 | 1 Ref      |
| MZ570151 | Unassigned | Unassigned | Unassigned | 191_24  | Clustered/Singleton | 1 VC_191_24  | 1   | 0      | 1          | 0      | 0 | 0 | 0 | 1 Ref      |
| MZ570263 | Unassigned | Unassigned | Unassigned | 817_0   | Clustered           | 14 VC_817_0  | 14  | 0.6342 | 1          | 0.6342 | 0 | 0 | 0 | 1 Ref      |
| MZ570427 | Unassigned | Unassigned | Unassigned | 1465_0  | Clustered           | 2 VC_1465_0  | 2   | 1      | 1          | 1      | 0 | 0 | 0 | 1 Ref      |
| MZ571827 | Unassigned | Unassigned | Unassigned | 111_0   | Clustered           | 91 VC_111_0  | 91  | 0.9587 | 1          | 0.9587 | 0 | 0 | 0 | 1 Ref      |
| MZ571828 | Unassigned | Unassigned | Unassigned | 192_0   | Clustered           | 15 VC_192_0  | 15  | 0.5071 | 1          | 0.5071 | 0 | 0 | 0 | 1 Ref      |
| MZ571830 | Unassigned | Unassigned | Unassigned | 192_0   | Clustered           | 15 VC_192_0  | 15  | 0.5071 | 1          | 0.5071 | 0 | 0 | 0 | 1 Ref      |
| MZ571831 | Unassigned | Unassigned | Unassigned | 938_0   | Clustered           | 99 VC_938_0  | 99  | 0.9119 | 1          | 0.9119 | 0 | 0 | 0 | 0.9928 Ref |
| MZ571832 | Unassigned | Unassigned | Unassigned | 823_0   | Clustered           | 124 VC_823_0 | 124 | 0.9492 | 1          | 0.9492 | 0 | 0 | 0 | 1 Ref      |
| MZ571833 | Unassigned | Unassigned | Unassigned | 938_0   | Clustered           | 99 VC_938_0  | 99  | 0.9119 | 1          | 0.9119 | 0 | 0 | 0 | 0.9928 Ref |
| MZ571834 | Unassigned | Unassigned | Unassigned | 938_0   | Clustered           | 99 VC_938_0  | 99  | 0.9119 | 1          | 0.9119 | 0 | 0 | 0 | 0.9928 Ref |
| MZ573923 | Unassigned | Unassigned | Unassigned | 149_15  | Clustered           | 16 VC_149_15 | 16  | 0.0788 | 1          | 0.0788 | 0 | 0 | 0 | 0.8083 Ref |
| MZ573924 | Unassigned | Unassigned | Unassigned | 452_0   | Clustered           | 66 VC_452_0  | 66  | 0.9248 | 1          | 0.9248 | 0 | 0 | 0 | 1 Ref      |



|          |            |            |            |        |                     |    |           |    |        |            |        |   |   |   |        |     |
|----------|------------|------------|------------|--------|---------------------|----|-----------|----|--------|------------|--------|---|---|---|--------|-----|
| MZ576217 | Unassigned | Unassigned | Unassigned | 638_0  | Clustered           | 45 | VC_638_0  | 45 | 0.7741 | 1          | 0.7741 | 0 | 0 | 0 | 1      | Ref |
| MZ576218 | Unassigned | Unassigned | Unassigned | 638_0  | Clustered           | 45 | VC_638_0  | 45 | 0.7741 | 1          | 0.7741 | 0 | 0 | 0 | 1      | Ref |
| MZ577095 | Unassigned | Unassigned | Unassigned | 436_0  | Clustered           | 4  | VC_436_0  | 4  | 0.3318 | 0.99998719 | 0.3318 | 0 | 0 | 0 | 1      | Ref |
| MZ577096 | Unassigned | Unassigned | Unassigned | 436_0  | Clustered           | 4  | VC_436_0  | 4  | 0.3318 | 0.99998719 | 0.3318 | 0 | 0 | 0 | 1      | Ref |
| MZ577097 | Unassigned | Unassigned | Unassigned | 436_0  | Clustered           | 4  | VC_436_0  | 4  | 0.3318 | 0.99998719 | 0.3318 | 0 | 0 | 0 | 1      | Ref |
| MZ577098 | Unassigned | Unassigned | Unassigned | 436_0  | Clustered           | 4  | VC_436_0  | 4  | 0.3318 | 0.99998719 | 0.3318 | 0 | 0 | 0 | 1      | Ref |
| MZ592920 | Unassigned | Unassigned | Unassigned | 878_0  | Clustered           | 32 | VC_878_0  | 32 | 0.9965 | 1          | 0.9965 | 0 | 0 | 0 | 1      | Ref |
| MZ592921 | Unassigned | Unassigned | Unassigned | 837_0  | Clustered           | 29 | VC_837_0  | 29 | 0.9955 | 1          | 0.9955 | 0 | 0 | 0 | 1      | Ref |
| MZ592922 | Unassigned | Unassigned | Unassigned | 882_0  | Clustered           | 20 | VC_882_0  | 20 | 0.9917 | 1          | 0.9917 | 0 | 0 | 0 | 1      | Ref |
| MZ593174 | Unassigned | Unassigned | Unassigned | 699_0  | Clustered           | 71 | VC_699_0  | 71 | 0.9352 | 1          | 0.9352 | 0 | 0 | 0 | 1      | Ref |
| MZ593728 | Unassigned | Unassigned | Unassigned | 698_0  | Clustered           | 26 | VC_698_0  | 26 | 0.9366 | 1          | 0.9366 | 0 | 0 | 0 | 1      | Ref |
| MZ598487 | Unassigned | Unassigned | Unassigned | 129_0  | Clustered           | 43 | VC_129_0  | 43 | 0.886  | 1          | 0.886  | 0 | 0 | 0 | 1      | Ref |
| MZ598515 | Unassigned | Unassigned | Unassigned | 937_0  | Clustered           | 40 | VC_937_0  | 40 | 0.6809 | 1          | 0.6809 | 0 | 0 | 0 | 0.9359 | Ref |
| MZ602146 | Unassigned | Unassigned | Unassigned | 111_0  | Clustered           | 91 | VC_111_0  | 91 | 0.9587 | 1          | 0.9587 | 0 | 0 | 0 | 1      | Ref |
| MZ602147 | Unassigned | Unassigned | Unassigned | 582_3  | Clustered           | 12 | VC_582_3  | 12 | 0.2357 | 1          | 0.2357 | 0 | 0 | 0 | 0.8636 | Ref |
| MZ602148 | Unassigned | Unassigned | Unassigned | 491_0  | Clustered           | 36 | VC_491_0  | 36 | 0.5336 | 1          | 0.5336 | 0 | 0 | 0 | 0.9714 | Ref |
| MZ605292 | Unassigned | Unassigned | Unassigned | 1030_0 | Clustered           | 3  | VC_1030_0 | 3  | 0.7895 | 0.99542416 | 0.7859 | 0 | 0 | 0 | 1      | Ref |
| MZ605293 | Unassigned | Unassigned | Unassigned | 78_0   | Clustered           | 2  | VC_78_0   | 2  | 0.0306 | 0.95617387 | 0.0293 | 0 | 0 | 0 | 1      | Ref |
| MZ611865 | Unassigned | Unassigned | Unassigned | 316_0  | Clustered           | 3  | VC_316_0  | 3  | 0.774  | 0.99820498 | 0.7726 | 0 | 0 | 0 | 1      | Ref |
| MZ612130 | Unassigned | Unassigned | Unassigned | 668_0  | Clustered           | 25 | VC_668_0  | 25 | 0.5539 | 1          | 0.5539 | 0 | 0 | 0 | 0.96   | Ref |
| MZ618622 | Unassigned | Unassigned | Unassigned | 698_0  | Clustered           | 26 | VC_698_0  | 26 | 0.9366 | 1          | 0.9366 | 0 | 0 | 0 | 1      | Ref |
| MZ622157 | Unassigned | Unassigned | Unassigned | 551_6  | Clustered           | 22 | VC_551_6  | 22 | 0.1214 | 1          | 0.1214 | 0 | 0 | 0 | 0.8095 | Ref |
| MZ622158 | Unassigned | Unassigned | Unassigned | 551_7  | Clustered           | 28 | VC_551_7  | 28 | 0.1661 | 1          | 0.1661 | 0 | 0 | 0 | 0.8519 | Ref |
| MZ622159 | Unassigned | Unassigned | Unassigned | 515_0  | Clustered           | 16 | VC_515_0  | 16 | 0.3793 | 1          | 0.3793 | 0 | 0 | 0 | 1      | Ref |
| MZ622160 | Unassigned | Unassigned | Unassigned | 1224_0 | Clustered           | 19 | VC_1224_0 | 19 | 1      | 1          | 1      | 0 | 0 | 0 | 1      | Ref |
| MZ622161 | Unassigned | Unassigned | Unassigned | 685_0  | Clustered           | 16 | VC_685_0  | 16 | 0.2972 | 1          | 0.2972 | 0 | 0 | 0 | 0.9167 | Ref |
| MZ622162 | Unassigned | Unassigned | Unassigned | 521_0  | Clustered           | 37 | VC_521_0  | 37 | 0.912  | 1          | 0.912  | 0 | 0 | 0 | 1      | Ref |
| MZ622163 | Unassigned | Unassigned | Unassigned | 551_7  | Clustered           | 28 | VC_551_7  | 28 | 0.1661 | 1          | 0.1661 | 0 | 0 | 0 | 0.8519 | Ref |
| MZ622164 | Unassigned | Unassigned | Unassigned | 1176_0 | Clustered           | 41 | VC_1176_0 | 41 | 0.9558 | 1          | 0.9558 | 0 | 0 | 0 | 0.9976 | Ref |
| MZ622165 | Unassigned | Unassigned | Unassigned | 685_0  | Clustered           | 16 | VC_685_0  | 16 | 0.2972 | 1          | 0.2972 | 0 | 0 | 0 | 0.9167 | Ref |
| MZ622166 | Unassigned | Unassigned | Unassigned | 856_1  | Clustered           | 13 | VC_856_1  | 13 | 0.5848 | 1          | 0.5848 | 0 | 0 | 0 | 1      | Ref |
| MZ622167 | Unassigned | Unassigned | Unassigned | 919_0  | Clustered           | 39 | VC_919_0  | 39 | 0.9069 | 1          | 0.9069 | 0 | 0 | 0 | 1      | Ref |
| MZ622168 | Unassigned | Unassigned | Unassigned | 799_1  | Clustered           | 27 | VC_799_1  | 27 | 0.8611 | 1          | 0.8611 | 0 | 0 | 0 | 1      | Ref |
| MZ622169 | Unassigned | Unassigned | Unassigned | 546_4  | Clustered           | 16 | VC_546_4  | 16 | 0.2517 | 0.99999998 | 0.2517 | 0 | 0 | 0 | 0.9417 | Ref |
| MZ622170 | Unassigned | Unassigned | Unassigned | 1348_0 | Clustered           | 5  | VC_1348_0 | 5  | 0.5462 | 0.99999985 | 0.5462 | 0 | 0 | 0 | 1      | Ref |
| MZ622171 | Unassigned | Unassigned | Unassigned | 216_6  | Clustered           | 42 | VC_216_6  | 42 | 0.473  | 1          | 0.473  | 0 | 0 | 0 | 0.8351 | Ref |
| MZ622172 | Unassigned | Unassigned | Unassigned | 371_19 | Clustered/Singleton | 1  | VC_371_19 | 1  | 0      | 1          | 0      | 0 | 0 | 0 | 1      | Ref |
| MZ622173 | Unassigned | Unassigned | Unassigned | 371_16 | Clustered           | 42 | VC_371_16 | 42 | 0.1341 | 1          | 0.1341 | 0 | 0 | 0 | 0.7282 | Ref |
| MZ622176 | Unassigned | Unassigned | Unassigned | 224_0  | Clustered           | 19 | VC_224_0  | 19 | 0.9416 | 1          | 0.9416 | 0 | 0 | 0 | 1      | Ref |
| MZ622177 | Unassigned | Unassigned | Unassigned | 1178_0 | Clustered           | 24 | VC_1178_0 | 24 | 0.9524 | 1          | 0.9524 | 0 | 0 | 0 | 1      | Ref |
| MZ622178 | Unassigned | Unassigned | Unassigned | 767_0  | Clustered           | 34 | VC_767_0  | 34 | 0.9173 | 1          | 0.9173 | 0 | 0 | 0 | 1      | Ref |
| MZ622179 | Unassigned | Unassigned | Unassigned | 1352_0 | Clustered           | 31 | VC_1352_0 | 31 | 0.849  | 1          | 0.849  | 0 | 0 | 0 | 1      | Ref |
| MZ622180 | Unassigned | Unassigned | Unassigned | 1344_0 | Clustered           | 78 | VC_1344_0 | 78 | 0.9732 | 1          | 0.9732 | 0 | 0 | 0 | 1      | Ref |
| MZ622181 | Unassigned | Unassigned | Unassigned | 810_0  | Clustered           | 18 | VC_810_0  | 18 | 0.9121 | 1          | 0.9121 | 0 | 0 | 0 | 1      | Ref |
| MZ622182 | Unassigned | Unassigned | Unassigned | 216_6  | Clustered           | 42 | VC_216_6  | 42 | 0.473  | 1          | 0.473  | 0 | 0 | 0 | 0.8351 | Ref |
| MZ622183 | Unassigned | Unassigned | Unassigned | 889_0  | Clustered           | 16 | VC_889_0  | 16 | 0.2969 | 1          | 0.2969 | 0 | 0 | 0 | 1      | Ref |
| MZ634338 | Unassigned | Unassigned | Unassigned | 111_0  | Clustered           | 91 | VC_111_0  | 91 | 0.9587 | 1          | 0.9587 | 0 | 0 | 0 | 1      | Ref |
| MZ634339 | Unassigned | Unassigned | Unassigned | 111_0  | Clustered           | 91 | VC_111_0  | 91 | 0.9587 | 1          | 0.9587 | 0 | 0 | 0 | 1      | Ref |
| MZ634340 | Unassigned | Unassigned | Unassigned | 111_0  | Clustered           | 91 | VC_111_0  | 91 | 0.9587 | 1          | 0.9587 | 0 | 0 | 0 | 1      | Ref |
| MZ634341 | Unassigned | Unassigned | Unassigned | 132_1  | Clustered           | 17 | VC_132_1  | 17 | 0.1738 | 1          | 0.1738 | 0 | 0 | 0 | 0.9853 | Ref |
| MZ634342 | Unassigned | Unassigned | Unassigned | 111_0  | Clustered           | 91 | VC_111_0  | 91 | 0.9587 | 1          | 0.9587 | 0 | 0 | 0 | 1      | Ref |
| MZ634343 | Unassigned | Unassigned | Unassigned | 111_0  | Clustered           | 91 | VC_111_0  | 91 | 0.9587 | 1          | 0.9587 | 0 | 0 | 0 | 1      | Ref |
| MZ634344 | Unassigned | Unassigned | Unassigned | 192_0  | Clustered           | 15 | VC_192_0  | 15 | 0.5071 | 1          | 0.5071 | 0 | 0 | 0 | 1      | Ref |
| MZ634345 | Unassigned | Unassigned | Unassigned | 938_0  | Clustered           | 99 | VC_938_0  | 99 | 0.9119 | 1          | 0.9119 | 0 | 0 | 0 | 0.9928 | Ref |
| MZ634346 | Unassigned | Unassigned | Unassigned | 938_0  | Clustered           | 99 | VC_938_0  | 99 | 0.9119 | 1          | 0.9119 | 0 | 0 | 0 | 0.9928 | Ref |
| MZ634348 | Unassigned | Unassigned | Unassigned | 937_0  | Clustered           | 40 | VC_937_0  | 40 | 0.6809 | 1          | 0.6809 | 0 | 0 | 0 | 0.9359 | Ref |
| MZ634350 | Unassigned | Unassigned | Unassigned | 937_0  | Clustered           | 40 | VC_937_0  | 40 | 0.6809 | 1          | 0.6809 | 0 | 0 | 0 | 0.9359 | Ref |
| MZ634351 | Unassigned | Unassigned | Unassigned | 937_0  | Clustered           | 40 | VC_937_0  | 40 | 0.6809 | 1          | 0.6809 | 0 | 0 | 0 | 0.9359 | Ref |
| MZ643272 | Unassigned | Unassigned | Unassigned | 153_0  | Clustered           | 25 | VC_153_0  | 25 | 0.7729 | 1          | 0.7729 | 0 | 0 | 0 | 1      | Ref |
| MZ648031 | Unassigned | Unassigned | Unassigned | 1344_0 | Clustered           | 78 | VC_1344_0 | 78 | 0.9732 | 1          | 0.9732 | 0 | 0 | 0 | 1      | Ref |
| MZ648032 | Unassigned | Unassigned | Unassigned | 982_0  | Clustered           | 62 | VC_982_0  | 62 | 0.8646 | 1          | 0.8646 | 0 | 0 | 0 | 0.743  | Ref |
| MZ648033 | Unassigned | Unassigned | Unassigned | 859_0  | Clustered           | 9  | VC_859_0  | 9  | 0.9426 | 1          | 0.9426 | 0 | 0 | 0 | 1      | Ref |
| MZ648034 | Unassigned | Unassigned | Unassigned | 325_25 | Clustered/Singleton | 1  | VC_325_25 | 1  | 0      | 1          | 0      | 0 | 0 | 0 | 1      | Ref |
| MZ648035 | Unassigned | Unassigned | Unassigned | 1352_0 | Clustered           | 31 | VC_1352_0 | 31 | 0.849  | 1          | 0.849  | 0 | 0 | 0 | 1      | Ref |
| MZ648036 | Unassigned | Unassigned | Unassigned | 859_0  | Clustered           | 9  | VC_859_0  | 9  | 0.9426 | 1          | 0.9426 | 0 | 0 | 0 | 1      | Ref |
| MZ648037 | Unassigned | Unassigned | Unassigned | 236_0  | Clustered           | 72 | VC_236_0  | 72 | 0.8104 | 1          | 0.8104 | 0 | 0 | 0 | 1      | Ref |
| MZ648038 | Unassigned | Unassigned | Unassigned | 371_11 | Clustered           | 31 | VC_371_11 | 31 | 0.0927 | 1          | 0.0927 | 0 | 0 | 0 | 0.7011 | Ref |
| MZ648039 | Unassigned | Unassigned | Unassigned | 982_0  | Clustered           | 62 | VC_982_0  | 62 | 0.8646 | 1          | 0.8646 | 0 | 0 | 0 | 0.743  | Ref |
| MZ648040 | Unassigned | Unassigned | Unassigned | 982_0  | Clustered           | 62 | VC_982_0  | 62 | 0.8646 | 1          | 0.8646 | 0 | 0 | 0 | 0.743  | Ref |
| MZ648041 | Unassigned | Unassigned | Unassigned | 371_8  | Clustered/Singleton | 1  | VC_371_8  | 1  | 0      | 1          | 0      | 0 | 0 | 0 | 1      | Ref |
| MZ648214 | Unassigned | Unassigned | Unassigned | 813_1  | Clustered           | 24 | VC_813_1  | 24 | 0.535  | 1          | 0.535  | 0 | 0 | 0 | 1      | Ref |
| MZ648215 | Unassigned | Unassigned | Unassigned | 451_0  | Clustered           | 80 | VC_451_0  | 80 | 0.9991 | 1          | 0.9991 | 0 | 0 | 0 | 1      | Ref |
| MZ666938 | Unassigned | Unassigned | Unassigned | 481_0  | Clustered           | 8  | VC_481_0  | 8  | 0.1348 | 1          | 0.1348 | 0 | 0 | 0 | 1      | Ref |
| MZ666965 | Unassigned | Unassigned | Unassigned | 75_0   | Clustered           | 2  | VC_75_0   | 2  | 0.0563 | 0.95619279 | 0.0538 | 0 | 0 | 0 | 1      | Ref |
| MZ666966 | Unassigned | Unassigned | Unassigned | 75_0   | Clustered           | 2  | VC_75_0   | 2  | 0.0563 | 0.95619279 | 0.0538 | 0 | 0 | 0 | 1      | Ref |
| MZ675741 | Unassigned | Unassigned | Unassigned | 696_1  | Clustered           | 8  | VC_696_1  | 8  | 0.5452 | 1          | 0.5452 | 0 | 0 | 0 | 0.9286 | Ref |
| MZ681505 | Unassigned | Unassigned | Unassigned | 551_6  | Clustered           | 22 | VC_551_6  | 22 | 0.1214 | 1          | 0.1214 | 0 | 0 | 0 | 0.8095 | Ref |
| MZ681506 | Unassigned | Unassigned | Unassigned | 1207_0 | Clustered           | 29 | VC_1207_0 | 29 | 0.8225 | 1          | 0.8225 | 0 | 0 | 0 | 1      | Ref |
| MZ681507 | Unassigned | Unassigned | Unassigned | 410_0  | Clustered           | 7  | VC_410_0  | 7  | 0.7905 | 1          | 0.7905 | 0 | 0 | 0 | 1      | Ref |
| MZ681508 | Unassigned | Unassigned | Unassigned | 224_0  | Clustered           | 19 | VC_224_0  | 19 | 0.9416 | 1          | 0.9416 | 0 | 0 | 0 | 1      | Ref |
| MZ681509 | Unassigned | Unassigned | Unassigned | 1175_0 | Clustered           | 22 | VC_1175_0 | 22 | 0.4562 | 1          | 0.4562 | 0 | 0 | 0 | 1      | Ref |



|          |            |            |            |         |                     |              |     |        |            |        |   |   |   |            |
|----------|------------|------------|------------|---------|---------------------|--------------|-----|--------|------------|--------|---|---|---|------------|
| MZ681510 | Unassigned | Unassigned | Unassigned | 1093_0  | Clustered           | 40 VC_1093_0 | 40  | 0.8754 | 1          | 0.8754 | 0 | 0 | 0 | 1 Ref      |
| MZ681511 | Unassigned | Unassigned | Unassigned | 558_20  | Clustered           | 17 VC_558_20 | 17  | 0.054  | 1          | 0.054  | 0 | 0 | 0 | 0.9926 Ref |
| MZ681512 | Unassigned | Unassigned | Unassigned | 520_59  | Clustered           | 5 VC_520_59  | 5   | 0.0459 | 0.99999997 | 0.0459 | 0 | 0 | 0 | 1 Ref      |
| MZ681513 | Unassigned | Unassigned | Unassigned | 1343_0  | Clustered           | 21 VC_1343_0 | 21  | 0.9843 | 1          | 0.9843 | 0 | 0 | 0 | 1 Ref      |
| MZ681516 | Unassigned | Unassigned | Unassigned | 223_0   | Clustered           | 38 VC_223_0  | 38  | 0.9095 | 1          | 0.9095 | 0 | 0 | 0 | 1 Ref      |
| MZ681518 | Unassigned | Unassigned | Unassigned | 514_0   | Clustered           | 75 VC_514_0  | 75  | 0.9402 | 1          | 0.9402 | 0 | 0 | 0 | 1 Ref      |
| MZ681519 | Unassigned | Unassigned | Unassigned | 520_31  | Clustered           | 11 VC_520_31 | 11  | 0.0897 | 1          | 0.0897 | 0 | 0 | 0 | 0.6 Ref    |
| MZ681520 | Unassigned | Unassigned | Unassigned | 371_9   | Clustered           | 4 VC_371_9   | 4   | 0.0109 | 0.9999766  | 0.0109 | 0 | 0 | 0 | 0.6667 Ref |
| MZ681930 | Unassigned | Unassigned | Unassigned | 283_155 | Clustered           | 2 VC_283_155 | 2   | 0.0027 | 0.9528577  | 0.0026 | 0 | 0 | 0 | 1 Ref      |
| MZ687409 | Unassigned | Unassigned | Unassigned | 423_0   | Clustered           | 45 VC_423_0  | 45  | 0.9484 | 1          | 0.9484 | 0 | 0 | 0 | 1 Ref      |
| MZ701794 | Unassigned | Unassigned | Unassigned | 113_0   | Clustered           | 9 VC_113_0   | 9   | 0.519  | 1          | 0.519  | 0 | 0 | 0 | 1 Ref      |
| MZ707156 | Unassigned | Unassigned | Unassigned | 668_0   | Clustered           | 25 VC_668_0  | 25  | 0.5539 | 1          | 0.5539 | 0 | 0 | 0 | 0.96 Ref   |
| MZ707157 | Unassigned | Unassigned | Unassigned | 668_0   | Clustered           | 25 VC_668_0  | 25  | 0.5539 | 1          | 0.5539 | 0 | 0 | 0 | 0.96 Ref   |
| MZ712044 | Unassigned | Unassigned | Unassigned | 698_0   | Clustered           | 26 VC_698_0  | 26  | 0.9366 | 1          | 0.9366 | 0 | 0 | 0 | 1 Ref      |
| MZ726791 | Unassigned | Unassigned | Unassigned | 329_6   | Clustered           | 3 VC_329_6   | 3   | 0.0107 | 0.99833469 | 0.0107 | 0 | 0 | 0 | 1 Ref      |
| MZ726792 | Unassigned | Unassigned | Unassigned | 329_6   | Clustered           | 3 VC_329_6   | 3   | 0.0107 | 0.99833469 | 0.0107 | 0 | 0 | 0 | 1 Ref      |
| MZ726793 | Unassigned | Unassigned | Unassigned | 847_1   | Clustered           | 26 VC_847_1  | 26  | 0.6323 | 1          | 0.6323 | 0 | 0 | 0 | 0.9815 Ref |
| MZ726794 | Unassigned | Unassigned | Unassigned | 451_0   | Clustered           | 80 VC_451_0  | 80  | 0.9991 | 1          | 0.9991 | 0 | 0 | 0 | 1 Ref      |
| MZ726795 | Unassigned | Unassigned | Unassigned | 283_56  | Clustered/Singleton | 1 VC_283_56  | 1   | 0      | 1          | 0      | 0 | 0 | 0 | 1 Ref      |
| MZ726796 | Unassigned | Unassigned | Unassigned | 461_0   | Clustered           | 96 VC_461_0  | 96  | 0.9307 | 1          | 0.9307 | 0 | 0 | 0 | 0.9575 Ref |
| MZ726797 | Unassigned | Unassigned | Unassigned | 1049_0  | Clustered           | 8 VC_1049_0  | 8   | 0.6413 | 1          | 0.6413 | 0 | 0 | 0 | 1 Ref      |
| MZ727333 | Unassigned | Unassigned | Unassigned | 755_0   | Clustered           | 9 VC_755_0   | 9   | 0.4489 | 1          | 0.4489 | 0 | 0 | 0 | 1 Ref      |
| MZ747508 | Unassigned | Unassigned | Unassigned | 761_0   | Clustered           | 67 VC_761_0  | 67  | 0.8947 | 1          | 0.8947 | 0 | 0 | 0 | 1 Ref      |
| MZ747509 | Unassigned | Unassigned | Unassigned | 517_1   | Clustered           | 108 VC_517_1 | 108 | 0.8483 | 1          | 0.8483 | 0 | 0 | 0 | 0.9955 Ref |
| MZ747510 | Unassigned | Unassigned | Unassigned | 557_1   | Clustered           | 11 VC_557_1  | 11  | 0.4945 | 1          | 0.4945 | 0 | 0 | 0 | 0.7818 Ref |
| MZ747511 | Unassigned | Unassigned | Unassigned | 556_0   | Clustered           | 21 VC_556_0  | 21  | 0.9912 | 1          | 0.9912 | 0 | 0 | 0 | 1 Ref      |
| MZ747512 | Unassigned | Unassigned | Unassigned | 520_86  | Clustered/Singleton | 1 VC_520_86  | 1   | 0      | 1          | 0      | 0 | 0 | 0 | 1 Ref      |
| MZ747513 | Unassigned | Unassigned | Unassigned | 1234_0  | Clustered           | 44 VC_1234_0 | 44  | 1      | 1          | 1      | 0 | 0 | 0 | 1 Ref      |
| MZ747514 | Unassigned | Unassigned | Unassigned | 514_0   | Clustered           | 75 VC_514_0  | 75  | 0.9402 | 1          | 0.9402 | 0 | 0 | 0 | 1 Ref      |
| MZ747515 | Unassigned | Unassigned | Unassigned | 1162_0  | Clustered           | 10 VC_1162_0 | 10  | 0.5715 | 1          | 0.5715 | 0 | 0 | 0 | 1 Ref      |
| MZ747516 | Unassigned | Unassigned | Unassigned | 1207_0  | Clustered           | 29 VC_1207_0 | 29  | 0.8225 | 1          | 0.8225 | 0 | 0 | 0 | 1 Ref      |
| MZ747517 | Unassigned | Unassigned | Unassigned | 221_0   | Clustered           | 22 VC_221_0  | 22  | 0.7447 | 1          | 0.7447 | 0 | 0 | 0 | 1 Ref      |
| MZ747518 | Unassigned | Unassigned | Unassigned | 452_0   | Clustered           | 66 VC_452_0  | 66  | 0.9248 | 1          | 0.9248 | 0 | 0 | 0 | 1 Ref      |
| MZ747519 | Unassigned | Unassigned | Unassigned | 520_65  | Clustered/Singleton | 1 VC_520_65  | 1   | 0      | 1          | 0      | 0 | 0 | 0 | 1 Ref      |
| MZ747520 | Unassigned | Unassigned | Unassigned | 802_0   | Clustered           | 17 VC_802_0  | 17  | 0.8025 | 1          | 0.8025 | 0 | 0 | 0 | 1 Ref      |
| MZ747521 | Unassigned | Unassigned | Unassigned | 221_0   | Clustered           | 22 VC_221_0  | 22  | 0.7447 | 1          | 0.7447 | 0 | 0 | 0 | 1 Ref      |
| MZ747522 | Unassigned | Unassigned | Unassigned | 1075_0  | Clustered           | 4 VC_1075_0  | 4   | 0.1483 | 0.99998427 | 0.1483 | 0 | 0 | 0 | 1 Ref      |
| MZ751040 | Unassigned | Unassigned | Unassigned | 87_0    | Clustered           | 8 VC_87_0    | 8   | 0.5545 | 1          | 0.5545 | 0 | 0 | 0 | 1 Ref      |
| MZ753803 | Unassigned | Unassigned | Unassigned | 283_106 | Clustered/Singleton | 1 VC_283_106 | 1   | 0      | 1          | 0      | 0 | 0 | 0 | 1 Ref      |
| MZ773648 | Unassigned | Unassigned | Unassigned | 833_0   | Clustered           | 16 VC_833_0  | 16  | 0.9351 | 1          | 0.9351 | 0 | 0 | 0 | 1 Ref      |
| MZ773939 | Unassigned | Unassigned | Unassigned | 297_1   | Clustered           | 20 VC_297_1  | 20  | 0.5653 | 1          | 0.5653 | 0 | 0 | 0 | 0.7684 Ref |
| MZ779062 | Unassigned | Unassigned | Unassigned | 723_0   | Clustered           | 9 VC_723_0   | 9   | 0.7138 | 1          | 0.7138 | 0 | 0 | 0 | 1 Ref      |
| MZ779063 | Unassigned | Unassigned | Unassigned | 449_0   | Clustered           | 7 VC_449_0   | 7   | 0.6015 | 1          | 0.6015 | 0 | 0 | 0 | 1 Ref      |
| MZ803112 | Unassigned | Unassigned | Unassigned | 340_0   | Clustered           | 31 VC_340_0  | 31  | 0.9549 | 1          | 0.9549 | 0 | 0 | 0 | 1 Ref      |
| MZ820083 | Unassigned | Unassigned | Unassigned | 1234_0  | Clustered           | 44 VC_1234_0 | 44  | 1      | 1          | 1      | 0 | 0 | 0 | 1 Ref      |
| MZ820085 | Unassigned | Unassigned | Unassigned | 559_1   | Clustered/Singleton | 1 VC_559_1   | 1   | 0      | 1          | 0      | 0 | 0 | 0 | 1 Ref      |
| MZ820087 | Unassigned | Unassigned | Unassigned | 1207_0  | Clustered           | 29 VC_1207_0 | 29  | 0.8225 | 1          | 0.8225 | 0 | 0 | 0 | 1 Ref      |
| MZ820088 | Unassigned | Unassigned | Unassigned | 982_0   | Clustered           | 62 VC_982_0  | 62  | 0.8646 | 1          | 0.8646 | 0 | 0 | 0 | 0.743 Ref  |
| MZ820089 | Unassigned | Unassigned | Unassigned | 1096_0  | Clustered           | 5 VC_1096_0  | 5   | 0.8566 | 0.99869977 | 0.8555 | 0 | 0 | 0 | 1 Ref      |
| MZ820090 | Unassigned | Unassigned | Unassigned | 216_6   | Clustered           | 42 VC_216_6  | 42  | 0.473  | 1          | 0.473  | 0 | 0 | 0 | 0.8351 Ref |
| MZ820091 | Unassigned | Unassigned | Unassigned | 982_0   | Clustered           | 62 VC_982_0  | 62  | 0.8646 | 1          | 0.8646 | 0 | 0 | 0 | 0.743 Ref  |
| MZ820092 | Unassigned | Unassigned | Unassigned | 982_0   | Clustered           | 62 VC_982_0  | 62  | 0.8646 | 1          | 0.8646 | 0 | 0 | 0 | 0.743 Ref  |
| MZ820093 | Unassigned | Unassigned | Unassigned | 1072_3  | Clustered           | 6 VC_1072_3  | 6   | 0.1304 | 0.99999994 | 0.1304 | 0 | 0 | 0 | 0.8667 Ref |
| MZ820094 | Unassigned | Unassigned | Unassigned | 1072_3  | Clustered           | 6 VC_1072_3  | 6   | 0.1304 | 0.99999994 | 0.1304 | 0 | 0 | 0 | 0.8667 Ref |
| MZ820095 | Unassigned | Unassigned | Unassigned | 1072_2  | Clustered           | 5 VC_1072_2  | 5   | 0.1003 | 0.99999315 | 0.1003 | 0 | 0 | 0 | 1 Ref      |
| MZ821031 | Unassigned | Unassigned | Unassigned | 1127_0  | Clustered           | 19 VC_1127_0 | 19  | 0.7611 | 1          | 0.7611 | 0 | 0 | 0 | 1 Ref      |
| MZ826344 | Unassigned | Unassigned | Unassigned | 129_0   | Clustered           | 43 VC_129_0  | 43  | 0.886  | 1          | 0.886  | 0 | 0 | 0 | 1 Ref      |
| MZ826345 | Unassigned | Unassigned | Unassigned | 129_0   | Clustered           | 43 VC_129_0  | 43  | 0.886  | 1          | 0.886  | 0 | 0 | 0 | 1 Ref      |
| MZ826346 | Unassigned | Unassigned | Unassigned | 129_0   | Clustered           | 43 VC_129_0  | 43  | 0.886  | 1          | 0.886  | 0 | 0 | 0 | 1 Ref      |
| MZ826347 | Unassigned | Unassigned | Unassigned | 129_0   | Clustered           | 43 VC_129_0  | 43  | 0.886  | 1          | 0.886  | 0 | 0 | 0 | 1 Ref      |
| MZ826348 | Unassigned | Unassigned | Unassigned | 129_0   | Clustered           | 43 VC_129_0  | 43  | 0.886  | 1          | 0.886  | 0 | 0 | 0 | 1 Ref      |
| MZ826349 | Unassigned | Unassigned | Unassigned | 129_0   | Clustered           | 43 VC_129_0  | 43  | 0.886  | 1          | 0.886  | 0 | 0 | 0 | 1 Ref      |
| MZ826350 | Unassigned | Unassigned | Unassigned | 78_5    | Clustered           | 6 VC_78_5    | 6   | 0.1087 | 0.99978082 | 0.1087 | 0 | 0 | 0 | 1 Ref      |
| MZ826351 | Unassigned | Unassigned | Unassigned | 129_0   | Clustered           | 43 VC_129_0  | 43  | 0.886  | 1          | 0.886  | 0 | 0 | 0 | 1 Ref      |
| MZ826352 | Unassigned | Unassigned | Unassigned | 129_0   | Clustered           | 43 VC_129_0  | 43  | 0.886  | 1          | 0.886  | 0 | 0 | 0 | 1 Ref      |
| MZ826353 | Unassigned | Unassigned | Unassigned | 78_5    | Clustered           | 6 VC_78_5    | 6   | 0.1087 | 0.99978082 | 0.1087 | 0 | 0 | 0 | 1 Ref      |
| MZ826354 | Unassigned | Unassigned | Unassigned | 129_0   | Clustered           | 43 VC_129_0  | 43  | 0.886  | 1          | 0.886  | 0 | 0 | 0 | 1 Ref      |
| MZ832314 | Unassigned | Unassigned | Unassigned | 638_0   | Clustered           | 45 VC_638_0  | 45  | 0.7741 | 1          | 0.7741 | 0 | 0 | 0 | 1 Ref      |
| MZ833439 | Unassigned | Unassigned | Unassigned | 392_0   | Clustered           | 126 VC_392_0 | 126 | 0.9621 | 1          | 0.9621 | 0 | 0 | 0 | 1 Ref      |
| MZ836210 | Unassigned | Unassigned | Unassigned | 460_0   | Clustered           | 19 VC_460_0  | 19  | 0.3744 | 1          | 0.3744 | 0 | 0 | 0 | 1 Ref      |
| MZ856343 | Unassigned | Unassigned | Unassigned | 558_42  | Clustered/Singleton | 1 VC_558_42  | 1   | 0      | 1          | 0      | 0 | 0 | 0 | 1 Ref      |
| MZ868638 | Unassigned | Unassigned | Unassigned | 286_13  | Clustered           | 10 VC_286_13 | 10  | 0.0698 | 0.99999929 | 0.0698 | 0 | 0 | 0 | 0.9556 Ref |
| MZ868713 | Unassigned | Unassigned | Unassigned | 78_3    | Clustered           | 11 VC_78_3   | 11  | 0.2572 | 1          | 0.2572 | 0 | 0 | 0 | 1 Ref      |
| MZ868714 | Unassigned | Unassigned | Unassigned | 155_0   | Clustered           | 14 VC_155_0  | 14  | 0.6095 | 1          | 0.6095 | 0 | 0 | 0 | 1 Ref      |
| MZ868715 | Unassigned | Unassigned | Unassigned | 155_0   | Clustered           | 14 VC_155_0  | 14  | 0.6095 | 1          | 0.6095 | 0 | 0 | 0 | 1 Ref      |
| MZ868716 | Unassigned | Unassigned | Unassigned | 155_0   | Clustered           | 14 VC_155_0  | 14  | 0.6095 | 1          | 0.6095 | 0 | 0 | 0 | 1 Ref      |
| MZ868717 | Unassigned | Unassigned | Unassigned | 155_0   | Clustered           | 14 VC_155_0  | 14  | 0.6095 | 1          | 0.6095 | 0 | 0 | 0 | 1 Ref      |
| MZ868718 | Unassigned | Unassigned | Unassigned | 697_0   | Clustered           | 5 VC_697_0   | 5   | 0.8303 | 0.99999971 | 0.8303 | 0 | 0 | 0 | 1 Ref      |
| MZ868724 | Unassigned | Unassigned | Unassigned | 699_0   | Clustered           | 71 VC_699_0  | 71  | 0.9352 | 1          | 0.9352 | 0 | 0 | 0 | 1 Ref      |
| MZ868725 | Unassigned | Unassigned | Unassigned | 699_0   | Clustered           | 71 VC_699_0  | 71  | 0.9352 | 1          | 0.9352 | 0 | 0 | 0 | 1 Ref      |
| MZ868726 | Unassigned | Unassigned | Unassigned | 699_0   | Clustered           | 71 VC_699_0  | 71  | 0.9352 | 1          | 0.9352 | 0 | 0 | 0 | 1 Ref      |



|          |            |            |            |         |                     |              |     |        |            |        |   |   |   |        |     |
|----------|------------|------------|------------|---------|---------------------|--------------|-----|--------|------------|--------|---|---|---|--------|-----|
| MZ890186 | Unassigned | Unassigned | Unassigned | 491_0   | Clustered           | 36 VC_491_0  | 36  | 0.5336 | 1          | 0.5336 | 0 | 0 | 0 | 0.9714 | Ref |
| MZ892987 | Unassigned | Unassigned | Unassigned | 305_0   | Clustered           | 12 VC_305_0  | 12  | 0.5745 | 1          | 0.5745 | 0 | 0 | 0 | 0.8485 | Ref |
| MZ892988 | Unassigned | Unassigned | Unassigned | 305_0   | Clustered           | 12 VC_305_0  | 12  | 0.5745 | 1          | 0.5745 | 0 | 0 | 0 | 0.8485 | Ref |
| MZ892989 | Unassigned | Unassigned | Unassigned | 305_0   | Clustered           | 12 VC_305_0  | 12  | 0.5745 | 1          | 0.5745 | 0 | 0 | 0 | 0.8485 | Ref |
| MZ892990 | Unassigned | Unassigned | Unassigned | 305_0   | Clustered           | 12 VC_305_0  | 12  | 0.5745 | 1          | 0.5745 | 0 | 0 | 0 | 0.8485 | Ref |
| MZ892991 | Unassigned | Unassigned | Unassigned | 305_0   | Clustered           | 12 VC_305_0  | 12  | 0.5745 | 1          | 0.5745 | 0 | 0 | 0 | 0.8485 | Ref |
| MZ892992 | Unassigned | Unassigned | Unassigned | 305_0   | Clustered           | 12 VC_305_0  | 12  | 0.5745 | 1          | 0.5745 | 0 | 0 | 0 | 0.8485 | Ref |
| MZ923531 | Unassigned | Unassigned | Unassigned | 451_0   | Clustered           | 80 VC_451_0  | 80  | 0.9991 | 1          | 0.9991 | 0 | 0 | 0 | 1      | Ref |
| MZ926748 | Unassigned | Unassigned | Unassigned | 464_0   | Clustered           | 8 VC_464_0   | 8   | 0.2629 | 1          | 0.2629 | 0 | 0 | 0 | 1      | Ref |
| MZ927745 | Unassigned | Unassigned | Unassigned | 749_0   | Clustered           | 40 VC_749_0  | 40  | 0.7517 | 1          | 0.7517 | 0 | 0 | 0 | 1      | Ref |
| MZ927746 | Unassigned | Unassigned | Unassigned | 749_0   | Clustered           | 40 VC_749_0  | 40  | 0.7517 | 1          | 0.7517 | 0 | 0 | 0 | 1      | Ref |
| MZ936314 | Unassigned | Unassigned | Unassigned | 699_0   | Clustered           | 71 VC_699_0  | 71  | 0.9352 | 1          | 0.9352 | 0 | 0 | 0 | 1      | Ref |
| MZ936315 | Unassigned | Unassigned | Unassigned | 699_0   | Clustered           | 71 VC_699_0  | 71  | 0.9352 | 1          | 0.9352 | 0 | 0 | 0 | 1      | Ref |
| MZ936316 | Unassigned | Unassigned | Unassigned | 699_0   | Clustered           | 71 VC_699_0  | 71  | 0.9352 | 1          | 0.9352 | 0 | 0 | 0 | 1      | Ref |
| MZ955866 | Unassigned | Unassigned | Unassigned | 637_0   | Clustered           | 115 VC_637_0 | 115 | 0.731  | 1          | 0.731  | 0 | 0 | 0 | 0.8764 | Ref |
| MZ955867 | Unassigned | Unassigned | Unassigned | 838_0   | Clustered           | 29 VC_838_0  | 29  | 0.8611 | 1          | 0.8611 | 0 | 0 | 0 | 1      | Ref |
| MZ955869 | Unassigned | Unassigned | Unassigned | 690_0   | Clustered           | 50 VC_690_0  | 50  | 0.9805 | 1          | 0.9805 | 0 | 0 | 0 | 1      | Ref |
| MZ955870 | Unassigned | Unassigned | Unassigned | 1159_0  | Clustered           | 3 VC_1159_0  | 3   | 0.3304 | 0.98548359 | 0.3256 | 0 | 0 | 0 | 1      | Ref |
| MZ958744 | Unassigned | Unassigned | Unassigned | 520_8   | Clustered/Singleton | 1 VC_520_8   | 1   | 0      | 1          | 0      | 0 | 0 | 0 | 1      | Ref |
| MZ958745 | Unassigned | Unassigned | Unassigned | 558_22  | Clustered           | 4 VC_558_22  | 4   | 0.01   | 0.99312819 | 0.0099 | 0 | 0 | 0 | 0.8333 | Ref |
| MZ958746 | Unassigned | Unassigned | Unassigned | 887_0   | Clustered           | 18 VC_887_0  | 18  | 0.3663 | 1          | 0.3663 | 0 | 0 | 0 | 1      | Ref |
| MZ958747 | Unassigned | Unassigned | Unassigned | 238_0   | Clustered           | 17 VC_238_0  | 17  | 0.6109 | 1          | 0.6109 | 0 | 0 | 0 | 1      | Ref |
| MZ958748 | Unassigned | Unassigned | Unassigned | 546_4   | Clustered           | 16 VC_546_4  | 16  | 0.2517 | 0.9999998  | 0.2517 | 0 | 0 | 0 | 0.9417 | Ref |
| MZ958749 | Unassigned | Unassigned | Unassigned | 1240_0  | Clustered           | 82 VC_1240_0 | 82  | 0.7945 | 1          | 0.7945 | 0 | 0 | 0 | 1      | Ref |
| MZ958750 | Unassigned | Unassigned | Unassigned | 1071_3  | Clustered           | 16 VC_1071_3 | 16  | 0.2354 | 1          | 0.2354 | 0 | 0 | 0 | 0.9667 | Ref |
| MZ967493 | Unassigned | Unassigned | Unassigned | 699_0   | Clustered           | 71 VC_699_0  | 71  | 0.9352 | 1          | 0.9352 | 0 | 0 | 0 | 1      | Ref |
| MZ969646 | Unassigned | Unassigned | Unassigned | 89_5    | Clustered/Singleton | 1 VC_89_5    | 1   | 0      | 1          | 0      | 0 | 0 | 0 | 1      | Ref |
| MZ995503 | Unassigned | Unassigned | Unassigned | 422_0   | Clustered           | 5 VC_422_0   | 5   | 0.2592 | 0.99999997 | 0.2592 | 0 | 0 | 0 | 1      | Ref |
| MZ995504 | Unassigned | Unassigned | Unassigned | 916_0   | Clustered           | 4 VC_916_0   | 4   | 0.8472 | 0.99985574 | 0.8471 | 0 | 0 | 0 | 1      | Ref |
| MZ995505 | Unassigned | Unassigned | Unassigned | 815_0   | Clustered           | 8 VC_815_0   | 8   | 0.9801 | 1          | 0.9801 | 0 | 0 | 0 | 1      | Ref |
| MZ995506 | Unassigned | Unassigned | Unassigned | 422_0   | Clustered           | 5 VC_422_0   | 5   | 0.2592 | 0.99999997 | 0.2592 | 0 | 0 | 0 | 1      | Ref |
| MZ997838 | Unassigned | Unassigned | Unassigned | 638_0   | Clustered           | 45 VC_638_0  | 45  | 0.7741 | 1          | 0.7741 | 0 | 0 | 0 | 1      | Ref |
| MZ997839 | Unassigned | Unassigned | Unassigned | 452_0   | Clustered           | 66 VC_452_0  | 66  | 0.9248 | 1          | 0.9248 | 0 | 0 | 0 | 1      | Ref |
| MZ997840 | Unassigned | Unassigned | Unassigned | 452_0   | Clustered           | 66 VC_452_0  | 66  | 0.9248 | 1          | 0.9248 | 0 | 0 | 0 | 1      | Ref |
| MZ997841 | Unassigned | Unassigned | Unassigned | 452_0   | Clustered           | 66 VC_452_0  | 66  | 0.9248 | 1          | 0.9248 | 0 | 0 | 0 | 1      | Ref |
| OK018184 | Unassigned | Unassigned | Unassigned | 283_165 | Clustered/Singleton | 1 VC_283_165 | 1   | 0      | 1          | 0      | 0 | 0 | 0 | 1      | Ref |
| OK019720 | Unassigned | Unassigned | Unassigned | 586_0   | Clustered           | 3 VC_586_0   | 3   | 0.0495 | 0.99859933 | 0.0495 | 0 | 0 | 0 | 1      | Ref |
| OK040170 | Unassigned | Unassigned | Unassigned | 488_1   | Clustered           | 8 VC_488_1   | 8   | 0.2927 | 1          | 0.2927 | 0 | 0 | 0 | 1      | Ref |
| OK040171 | Unassigned | Unassigned | Unassigned | 78_2    | Clustered/Singleton | 1 VC_78_2    | 1   | 0      | 1          | 0      | 0 | 0 | 0 | 1      | Ref |
| OK040777 | Unassigned | Unassigned | Unassigned | 1207_0  | Clustered           | 29 VC_1207_0 | 29  | 0.8225 | 1          | 0.8225 | 0 | 0 | 0 | 1      | Ref |
| OK040778 | Unassigned | Unassigned | Unassigned | 236_0   | Clustered           | 72 VC_236_0  | 72  | 0.8104 | 1          | 0.8104 | 0 | 0 | 0 | 1      | Ref |
| OK040779 | Unassigned | Unassigned | Unassigned | 1206_0  | Clustered           | 8 VC_1206_0  | 8   | 0.1913 | 1          | 0.1913 | 0 | 0 | 0 | 1      | Ref |
| OK040781 | Unassigned | Unassigned | Unassigned | 1344_0  | Clustered           | 78 VC_1344_0 | 78  | 0.9732 | 1          | 0.9732 | 0 | 0 | 0 | 1      | Ref |
| OK040782 | Unassigned | Unassigned | Unassigned | 236_0   | Clustered           | 72 VC_236_0  | 72  | 0.8104 | 1          | 0.8104 | 0 | 0 | 0 | 1      | Ref |
| OK040783 | Unassigned | Unassigned | Unassigned | 1344_0  | Clustered           | 78 VC_1344_0 | 78  | 0.9732 | 1          | 0.9732 | 0 | 0 | 0 | 1      | Ref |
| OK040784 | Unassigned | Unassigned | Unassigned | 236_0   | Clustered           | 72 VC_236_0  | 72  | 0.8104 | 1          | 0.8104 | 0 | 0 | 0 | 1      | Ref |
| OK040785 | Unassigned | Unassigned | Unassigned | 919_0   | Clustered           | 39 VC_919_0  | 39  | 0.9069 | 1          | 0.9069 | 0 | 0 | 0 | 1      | Ref |
| OK040786 | Unassigned | Unassigned | Unassigned | 890_1   | Clustered           | 4 VC_890_1   | 4   | 0.4613 | 0.99998458 | 0.4613 | 0 | 0 | 0 | 1      | Ref |
| OK040788 | Unassigned | Unassigned | Unassigned | 1343_0  | Clustered           | 21 VC_1343_0 | 21  | 0.9843 | 1          | 0.9843 | 0 | 0 | 0 | 1      | Ref |
| OK040789 | Unassigned | Unassigned | Unassigned | 558_50  | Clustered           | 15 VC_558_50 | 15  | 0.0468 | 1          | 0.0468 | 0 | 0 | 0 | 0.9238 | Ref |
| OK040790 | Unassigned | Unassigned | Unassigned | 1100_2  | Clustered/Singleton | 1 VC_1100_2  | 1   | 0      | 1          | 0      | 0 | 0 | 0 | 1      | Ref |
| OK040791 | Unassigned | Unassigned | Unassigned | 325_30  | Clustered           | 4 VC_325_30  | 4   | 0.0144 | 0.99998616 | 0.0144 | 0 | 0 | 0 | 0.8333 | Ref |
| OK040792 | Unassigned | Unassigned | Unassigned | 1349_0  | Clustered           | 7 VC_1349_0  | 7   | 0.2495 | 1          | 0.2495 | 0 | 0 | 0 | 1      | Ref |
| OK040793 | Unassigned | Unassigned | Unassigned | 1100_1  | Clustered           | 2 VC_1100_1  | 2   | 0.1223 | 0.94673154 | 0.1158 | 0 | 0 | 0 | 1      | Ref |
| OK040794 | Unassigned | Unassigned | Unassigned | 1099_1  | Clustered/Singleton | 1 VC_1099_1  | 1   | 0      | 1          | 0      | 0 | 0 | 0 | 1      | Ref |
| OK040806 | Unassigned | Unassigned | Unassigned | 329_17  | Clustered           | 4 VC_329_17  | 4   | 0.0163 | 0.99996247 | 0.0163 | 0 | 0 | 0 | 1      | Ref |
| OK040807 | Unassigned | Unassigned | Unassigned | 329_17  | Clustered           | 4 VC_329_17  | 4   | 0.0163 | 0.99996247 | 0.0163 | 0 | 0 | 0 | 1      | Ref |
| OK040907 | Unassigned | Unassigned | Unassigned | 283_3   | Clustered           | 3 VC_283_3   | 3   | 0.0055 | 0.9968017  | 0.0055 | 0 | 0 | 0 | 1      | Ref |
| OK041468 | Unassigned | Unassigned | Unassigned | 603_0   | Clustered           | 9 VC_603_0   | 9   | 0.9925 | 0.99999994 | 0.9925 | 0 | 0 | 0 | 1      | Ref |
| OK041469 | Unassigned | Unassigned | Unassigned | 594_0   | Clustered           | 2 VC_594_0   | 2   | 0.0737 | 0.95685859 | 0.0705 | 0 | 0 | 0 | 1      | Ref |
| OK042080 | Unassigned | Unassigned | Unassigned | 392_0   | Clustered           | 126 VC_392_0 | 126 | 0.9621 | 1          | 0.9621 | 0 | 0 | 0 | 1      | Ref |
| OK073976 | Unassigned | Unassigned | Unassigned | 792_0   | Clustered           | 35 VC_792_0  | 35  | 0.9828 | 1          | 0.9828 | 0 | 0 | 0 | 1      | Ref |
| OK076929 | Unassigned | Unassigned | Unassigned | 283_128 | Clustered/Singleton | 1 VC_283_128 | 1   | 0      | 1          | 0      | 0 | 0 | 0 | 1      | Ref |
| OK085710 | Unassigned | Unassigned | Unassigned | 341_0   | Clustered           | 3 VC_341_0   | 3   | 0.2522 | 0.9396546  | 0.237  | 0 | 0 | 0 | 1      | Ref |
| OK094519 | Unassigned | Unassigned | Unassigned | 130_0   | Clustered           | 19 VC_130_0  | 19  | 0.6068 | 1          | 0.6068 | 0 | 0 | 0 | 1      | Ref |
| OK094665 | Unassigned | Unassigned | Unassigned | 749_0   | Clustered           | 40 VC_749_0  | 40  | 0.7517 | 1          | 0.7517 | 0 | 0 | 0 | 1      | Ref |
| OK094707 | Unassigned | Unassigned | Unassigned | 174_0   | Clustered           | 3 VC_174_0   | 3   | 0.9624 | 0.99333557 | 0.9559 | 0 | 0 | 0 | 1      | Ref |
| OK095358 | Unassigned | Unassigned | Unassigned | 353_0   | Clustered           | 6 VC_353_0   | 6   | 0.545  | 1          | 0.545  | 0 | 0 | 0 | 1      | Ref |
| OK108607 | Unassigned | Unassigned | Unassigned | 190_23  | Clustered           | 10 VC_190_23 | 10  | 0.0704 | 1          | 0.0704 | 0 | 0 | 0 | 0.8444 | Ref |
| OK108608 | Unassigned | Unassigned | Unassigned | 637_0   | Clustered           | 115 VC_637_0 | 115 | 0.731  | 1          | 0.731  | 0 | 0 | 0 | 0.8764 | Ref |
| OK108609 | Unassigned | Unassigned | Unassigned | 637_0   | Clustered           | 115 VC_637_0 | 115 | 0.731  | 1          | 0.731  | 0 | 0 | 0 | 0.8764 | Ref |
| OK129343 | Unassigned | Unassigned | Unassigned | 792_0   | Clustered           | 35 VC_792_0  | 35  | 0.9828 | 1          | 0.9828 | 0 | 0 | 0 | 1      | Ref |
| OK136180 | Unassigned | Unassigned | Unassigned | 582_1   | Clustered           | 3 VC_582_1   | 3   | 0.0621 | 0.99815566 | 0.062  | 0 | 0 | 0 | 1      | Ref |
| OK136181 | Unassigned | Unassigned | Unassigned | 850_0   | Clustered           | 3 VC_850_0   | 3   | 0.0897 | 0.99847793 | 0.0896 | 0 | 0 | 0 | 1      | Ref |
| OK138555 | Unassigned | Unassigned | Unassigned | 938_0   | Clustered           | 99 VC_938_0  | 99  | 0.9119 | 1          | 0.9119 | 0 | 0 | 0 | 0.9928 | Ref |
| OK138556 | Unassigned | Unassigned | Unassigned | 823_0   | Clustered           | 124 VC_823_0 | 124 | 0.9492 | 1          | 0.9492 | 0 | 0 | 0 | 1      | Ref |
| OK143207 | Unassigned | Unassigned | Unassigned | 190_24  | Clustered           | 5 VC_190_24  | 5   | 0.0293 | 0.99999996 | 0.0293 | 0 | 0 | 0 | 0.7    | Ref |
| OK143508 | Unassigned | Unassigned | Unassigned | 637_0   | Clustered           | 115 VC_637_0 | 115 | 0.731  | 1          | 0.731  | 0 | 0 | 0 | 0.8764 | Ref |
| OK148439 | Unassigned | Unassigned | Unassigned | 792_0   | Clustered           | 35 VC_792_0  | 35  | 0.9828 | 1          | 0.9828 | 0 | 0 | 0 | 1      | Ref |
| OK148440 | Unassigned | Unassigned | Unassigned | 813_0   | Clustered           | 12 VC_813_0  | 12  | 0.2347 | 1          | 0.2347 | 0 | 0 | 0 | 1      | Ref |
| OK148441 | Unassigned | Unassigned | Unassigned | 283_108 | Clustered/Singleton | 1 VC_283_108 | 1   | 0      | 1          | 0      | 0 | 0 | 0 | 1      | Ref |



|          |            |            |            |         |                     |              |    |        |            |        |   |   |   |            |
|----------|------------|------------|------------|---------|---------------------|--------------|----|--------|------------|--------|---|---|---|------------|
| OK149215 | Unassigned | Unassigned | Unassigned | 385_0   | Clustered           | 51 VC_385_0  | 51 | 0.8754 | 1          | 0.8754 | 0 | 0 | 0 | 1 Ref      |
| OK169616 | Unassigned | Unassigned | Unassigned | 637_1   | Clustered           | 27 VC_637_1  | 27 | 0.2578 | 1          | 0.2578 | 0 | 0 | 0 | 0.9858 Ref |
| OK172329 | Unassigned | Unassigned | Unassigned | 760_0   | Clustered           | 3 VC_760_0   | 3  | 0.7281 | 0.9859071  | 0.7179 | 0 | 0 | 0 | 1 Ref      |
| OK173051 | Unassigned | Unassigned | Unassigned | 414_0   | Clustered           | 37 VC_414_0  | 37 | 0.585  | 1          | 0.585  | 0 | 0 | 0 | 0.9474 Ref |
| OK181858 | Unassigned | Unassigned | Unassigned | 582_1   | Clustered           | 3 VC_582_1   | 3  | 0.0621 | 0.99815566 | 0.062  | 0 | 0 | 0 | 1 Ref      |
| OK181860 | Unassigned | Unassigned | Unassigned | 850_0   | Clustered           | 3 VC_850_0   | 3  | 0.0897 | 0.99847793 | 0.0896 | 0 | 0 | 0 | 1 Ref      |
| OK181861 | Unassigned | Unassigned | Unassigned | 582_1   | Clustered           | 3 VC_582_1   | 3  | 0.0621 | 0.99815566 | 0.062  | 0 | 0 | 0 | 1 Ref      |
| OK181862 | Unassigned | Unassigned | Unassigned | 850_0   | Clustered           | 3 VC_850_0   | 3  | 0.0897 | 0.99847793 | 0.0896 | 0 | 0 | 0 | 1 Ref      |
| OK210074 | Unassigned | Unassigned | Unassigned | 451_0   | Clustered           | 80 VC_451_0  | 80 | 0.9991 | 1          | 0.9991 | 0 | 0 | 0 | 1 Ref      |
| OK210075 | Unassigned | Unassigned | Unassigned | 669_4   | Clustered/Singleton | 1 VC_669_4   | 1  | 0      | 1          | 0      | 0 | 0 | 0 | 1 Ref      |
| OK210077 | Unassigned | Unassigned | Unassigned | 848_0   | Clustered           | 28 VC_848_0  | 28 | 0.7927 | 1          | 0.7927 | 0 | 0 | 0 | 1 Ref      |
| OK216879 | Unassigned | Unassigned | Unassigned | 510_0   | Clustered           | 12 VC_510_0  | 12 | 0.3963 | 1          | 0.3963 | 0 | 0 | 0 | 0.9697 Ref |
| OK247671 | Unassigned | Unassigned | Unassigned | 542_0   | Clustered           | 2 VC_542_0   | 2  | 0.3753 | 0.94092208 | 0.3531 | 0 | 0 | 0 | 1 Ref      |
| OK254197 | Unassigned | Unassigned | Unassigned | 190_23  | Clustered           | 10 VC_190_23 | 10 | 0.0704 | 1          | 0.0704 | 0 | 0 | 0 | 0.8444 Ref |
| OK254198 | Unassigned | Unassigned | Unassigned | 290_1   | Clustered           | 8 VC_290_1   | 8  | 0.0757 | 1          | 0.0757 | 0 | 0 | 0 | 0.8571 Ref |
| OK258138 | Unassigned | Unassigned | Unassigned | 74_0    | Clustered           | 15 VC_74_0   | 15 | 0.5204 | 1          | 0.5204 | 0 | 0 | 0 | 1 Ref      |
| OK258139 | Unassigned | Unassigned | Unassigned | 78_5    | Clustered           | 6 VC_78_5    | 6  | 0.1087 | 0.99978082 | 0.1087 | 0 | 0 | 0 | 1 Ref      |
| OK258140 | Unassigned | Unassigned | Unassigned | 113_0   | Clustered           | 9 VC_113_0   | 9  | 0.519  | 1          | 0.519  | 0 | 0 | 0 | 1 Ref      |
| OK268422 | Unassigned | Unassigned | Unassigned | 1040_0  | Clustered           | 23 VC_1040_0 | 23 | 0.9605 | 1          | 0.9605 | 0 | 0 | 0 | 1 Ref      |
| OK268423 | Unassigned | Unassigned | Unassigned | 1040_0  | Clustered           | 23 VC_1040_0 | 23 | 0.9605 | 1          | 0.9605 | 0 | 0 | 0 | 1 Ref      |
| OK268424 | Unassigned | Unassigned | Unassigned | 1040_0  | Clustered           | 23 VC_1040_0 | 23 | 0.9605 | 1          | 0.9605 | 0 | 0 | 0 | 1 Ref      |
| OK268425 | Unassigned | Unassigned | Unassigned | 1040_0  | Clustered           | 23 VC_1040_0 | 23 | 0.9605 | 1          | 0.9605 | 0 | 0 | 0 | 1 Ref      |
| OK268426 | Unassigned | Unassigned | Unassigned | 1040_0  | Clustered           | 23 VC_1040_0 | 23 | 0.9605 | 1          | 0.9605 | 0 | 0 | 0 | 1 Ref      |
| OK268427 | Unassigned | Unassigned | Unassigned | 1040_0  | Clustered           | 23 VC_1040_0 | 23 | 0.9605 | 1          | 0.9605 | 0 | 0 | 0 | 1 Ref      |
| OK272470 | Unassigned | Unassigned | Unassigned | 848_0   | Clustered           | 28 VC_848_0  | 28 | 0.7927 | 1          | 0.7927 | 0 | 0 | 0 | 1 Ref      |
| OK272471 | Unassigned | Unassigned | Unassigned | 942_0   | Clustered           | 36 VC_942_0  | 36 | 0.7848 | 1          | 0.7848 | 0 | 0 | 0 | 1 Ref      |
| OK272472 | Unassigned | Unassigned | Unassigned | 329_12  | Clustered           | 2 VC_329_12  | 2  | 0.0041 | 0.72605466 | 0.003  | 0 | 0 | 0 | 1 Ref      |
| OK272473 | Unassigned | Unassigned | Unassigned | 283_59  | Clustered/Singleton | 1 VC_283_59  | 1  | 0      | 1          | 0      | 0 | 0 | 0 | 1 Ref      |
| OK272474 | Unassigned | Unassigned | Unassigned | 835_0   | Clustered           | 67 VC_835_0  | 67 | 0.9624 | 1          | 0.9624 | 0 | 0 | 0 | 1 Ref      |
| OK272476 | Unassigned | Unassigned | Unassigned | 283_60  | Clustered/Singleton | 1 VC_283_60  | 1  | 0      | 1          | 0      | 0 | 0 | 0 | 1 Ref      |
| OK272477 | Unassigned | Unassigned | Unassigned | 190_35  | Clustered/Singleton | 1 VC_190_35  | 1  | 0      | 1          | 0      | 0 | 0 | 0 | 1 Ref      |
| OK272478 | Unassigned | Unassigned | Unassigned | 942_0   | Clustered           | 36 VC_942_0  | 36 | 0.7848 | 1          | 0.7848 | 0 | 0 | 0 | 1 Ref      |
| OK272479 | Unassigned | Unassigned | Unassigned | 941_0   | Clustered           | 40 VC_941_0  | 40 | 0.6903 | 1          | 0.6903 | 0 | 0 | 0 | 1 Ref      |
| OK272480 | Unassigned | Unassigned | Unassigned | 190_16  | Clustered/Singleton | 1 VC_190_16  | 1  | 0      | 1          | 0      | 0 | 0 | 0 | 1 Ref      |
| OK272481 | Unassigned | Unassigned | Unassigned | 942_0   | Clustered           | 36 VC_942_0  | 36 | 0.7848 | 1          | 0.7848 | 0 | 0 | 0 | 1 Ref      |
| OK272482 | Unassigned | Unassigned | Unassigned | 772_19  | Clustered           | 16 VC_772_19 | 16 | 0.0975 | 0.9970466  | 0.0972 | 0 | 0 | 0 | 0.8083 Ref |
| OK272483 | Unassigned | Unassigned | Unassigned | 942_0   | Clustered           | 36 VC_942_0  | 36 | 0.7848 | 1          | 0.7848 | 0 | 0 | 0 | 1 Ref      |
| OK272484 | Unassigned | Unassigned | Unassigned | 283_62  | Clustered/Singleton | 1 VC_283_62  | 1  | 0      | 1          | 0      | 0 | 0 | 0 | 1 Ref      |
| OK272485 | Unassigned | Unassigned | Unassigned | 942_0   | Clustered           | 36 VC_942_0  | 36 | 0.7848 | 1          | 0.7848 | 0 | 0 | 0 | 1 Ref      |
| OK272486 | Unassigned | Unassigned | Unassigned | 942_0   | Clustered           | 36 VC_942_0  | 36 | 0.7848 | 1          | 0.7848 | 0 | 0 | 0 | 1 Ref      |
| OK272487 | Unassigned | Unassigned | Unassigned | 941_0   | Clustered           | 40 VC_941_0  | 40 | 0.6903 | 1          | 0.6903 | 0 | 0 | 0 | 1 Ref      |
| OK272488 | Unassigned | Unassigned | Unassigned | 835_0   | Clustered           | 67 VC_835_0  | 67 | 0.9624 | 1          | 0.9624 | 0 | 0 | 0 | 1 Ref      |
| OK272489 | Unassigned | Unassigned | Unassigned | 942_0   | Clustered           | 36 VC_942_0  | 36 | 0.7848 | 1          | 0.7848 | 0 | 0 | 0 | 1 Ref      |
| OK272490 | Unassigned | Unassigned | Unassigned | 329_3   | Clustered           | 24 VC_329_3  | 24 | 0.1206 | 1          | 0.1206 | 0 | 0 | 0 | 0.7283 Ref |
| OK274152 | Unassigned | Unassigned | Unassigned | 283_122 | Clustered/Singleton | 1 VC_283_122 | 1  | 0      | 1          | 0      | 0 | 0 | 0 | 1 Ref      |
| OK274245 | Unassigned | Unassigned | Unassigned | 83_0    | Clustered           | 6 VC_83_0    | 6  | 0.6436 | 1          | 0.6436 | 0 | 0 | 0 | 1 Ref      |
| OK275491 | Unassigned | Unassigned | Unassigned | 78_5    | Clustered           | 6 VC_78_5    | 6  | 0.1087 | 0.99978082 | 0.1087 | 0 | 0 | 0 | 1 Ref      |
| OK275492 | Unassigned | Unassigned | Unassigned | 169_0   | Clustered           | 20 VC_169_0  | 20 | 0.7529 | 1          | 0.7529 | 0 | 0 | 0 | 1 Ref      |
| OK275493 | Unassigned | Unassigned | Unassigned | 169_0   | Clustered           | 20 VC_169_0  | 20 | 0.7529 | 1          | 0.7529 | 0 | 0 | 0 | 1 Ref      |
| OK275494 | Unassigned | Unassigned | Unassigned | 364_0   | Clustered           | 16 VC_364_0  | 16 | 0.6491 | 1          | 0.6491 | 0 | 0 | 0 | 1 Ref      |
| OK275495 | Unassigned | Unassigned | Unassigned | 74_0    | Clustered           | 15 VC_74_0   | 15 | 0.5204 | 1          | 0.5204 | 0 | 0 | 0 | 1 Ref      |
| OK275722 | Unassigned | Unassigned | Unassigned | 283_109 | Clustered           | 2 VC_283_109 | 2  | 0.0027 | 0.91535723 | 0.0024 | 0 | 0 | 0 | 1 Ref      |
| OK283618 | Unassigned | Unassigned | Unassigned | 332_0   | Clustered           | 3 VC_332_0   | 3  | 0.0411 | 0.99858754 | 0.041  | 0 | 0 | 0 | 1 Ref      |
| OK283619 | Unassigned | Unassigned | Unassigned | 133_34  | Clustered           | 3 VC_133_34  | 3  | 0.0102 | 0.97369044 | 0.01   | 0 | 0 | 0 | 0.6667 Ref |
| OK288022 | Unassigned | Unassigned | Unassigned | 191_19  | Clustered           | 12 VC_191_19 | 12 | 0.0655 | 1          | 0.0655 | 0 | 0 | 0 | 0.8636 Ref |
| OK310502 | Unassigned | Unassigned | Unassigned | 1071_3  | Clustered           | 16 VC_1071_3 | 16 | 0.2354 | 1          | 0.2354 | 0 | 0 | 0 | 0.9667 Ref |
| OK310503 | Unassigned | Unassigned | Unassigned | 1164_0  | Clustered           | 25 VC_1164_0 | 25 | 0.7312 | 1          | 0.7312 | 0 | 0 | 0 | 1 Ref      |
| OK310504 | Unassigned | Unassigned | Unassigned | 1344_0  | Clustered           | 78 VC_1344_0 | 78 | 0.9732 | 1          | 0.9732 | 0 | 0 | 0 | 1 Ref      |
| OK310505 | Unassigned | Unassigned | Unassigned | 236_0   | Clustered           | 72 VC_236_0  | 72 | 0.8104 | 1          | 0.8104 | 0 | 0 | 0 | 1 Ref      |
| OK310506 | Unassigned | Unassigned | Unassigned | 1240_0  | Clustered           | 82 VC_1240_0 | 82 | 0.7945 | 1          | 0.7945 | 0 | 0 | 0 | 1 Ref      |
| OK310512 | Unassigned | Unassigned | Unassigned | 835_0   | Clustered           | 67 VC_835_0  | 67 | 0.9624 | 1          | 0.9624 | 0 | 0 | 0 | 1 Ref      |
| OK310513 | Unassigned | Unassigned | Unassigned | 835_0   | Clustered           | 67 VC_835_0  | 67 | 0.9624 | 1          | 0.9624 | 0 | 0 | 0 | 1 Ref      |
| OK310514 | Unassigned | Unassigned | Unassigned | 835_0   | Clustered           | 67 VC_835_0  | 67 | 0.9624 | 1          | 0.9624 | 0 | 0 | 0 | 1 Ref      |
| OK318957 | Unassigned | Unassigned | Unassigned | 1343_0  | Clustered           | 21 VC_1343_0 | 21 | 0.9843 | 1          | 0.9843 | 0 | 0 | 0 | 1 Ref      |
| OK318958 | Unassigned | Unassigned | Unassigned | 1234_0  | Clustered           | 44 VC_1234_0 | 44 | 1      | 1          | 1      | 0 | 0 | 0 | 1 Ref      |
| OK318959 | Unassigned | Unassigned | Unassigned | 514_0   | Clustered           | 75 VC_514_0  | 75 | 0.9402 | 1          | 0.9402 | 0 | 0 | 0 | 1 Ref      |
| OK318960 | Unassigned | Unassigned | Unassigned | 509_0   | Clustered           | 37 VC_509_0  | 37 | 0.9689 | 1          | 0.9689 | 0 | 0 | 0 | 1 Ref      |
| OK318961 | Unassigned | Unassigned | Unassigned | 1163_0  | Clustered           | 28 VC_1163_0 | 28 | 0.4923 | 1          | 0.4923 | 0 | 0 | 0 | 1 Ref      |
| OK318991 | Unassigned | Unassigned | Unassigned | 83_0    | Clustered           | 6 VC_83_0    | 6  | 0.6436 | 1          | 0.6436 | 0 | 0 | 0 | 1 Ref      |
| OK319016 | Unassigned | Unassigned | Unassigned | 70_0    | Clustered           | 27 VC_70_0   | 27 | 0.5981 | 1          | 0.5981 | 0 | 0 | 0 | 0.9886 Ref |
| OK322699 | Unassigned | Unassigned | Unassigned | 133_22  | Clustered           | 13 VC_133_22 | 13 | 0.0804 | 1          | 0.0804 | 0 | 0 | 0 | 0.8205 Ref |
| OK330455 | Unassigned | Unassigned | Unassigned | 749_0   | Clustered           | 40 VC_749_0  | 40 | 0.7517 | 1          | 0.7517 | 0 | 0 | 0 | 1 Ref      |
| OK330456 | Unassigned | Unassigned | Unassigned | 749_0   | Clustered           | 40 VC_749_0  | 40 | 0.7517 | 1          | 0.7517 | 0 | 0 | 0 | 1 Ref      |
| OK335775 | Unassigned | Unassigned | Unassigned | 290_5   | Clustered           | 14 VC_290_5  | 14 | 0.1422 | 1          | 0.1422 | 0 | 0 | 0 | 0.9231 Ref |
| OK335783 | Unassigned | Unassigned | Unassigned | 70_0    | Clustered           | 27 VC_70_0   | 27 | 0.5981 | 1          | 0.5981 | 0 | 0 | 0 | 0.9886 Ref |
| OK338687 | Unassigned | Unassigned | Unassigned | 363_0   | Clustered           | 2 VC_363_0   | 2  | 0.8022 | 0.72985431 | 0.5855 | 0 | 0 | 0 | 1 Ref      |
| OK340817 | Unassigned | Unassigned | Unassigned | 1040_0  | Clustered           | 23 VC_1040_0 | 23 | 0.9605 | 1          | 0.9605 | 0 | 0 | 0 | 1 Ref      |
| OK340818 | Unassigned | Unassigned | Unassigned | 1040_0  | Clustered           | 23 VC_1040_0 | 23 | 0.9605 | 1          | 0.9605 | 0 | 0 | 0 | 1 Ref      |
| OK340819 | Unassigned | Unassigned | Unassigned | 1040_0  | Clustered           | 23 VC_1040_0 | 23 | 0.9605 | 1          | 0.9605 | 0 | 0 | 0 | 1 Ref      |
| OK340820 | Unassigned | Unassigned | Unassigned | 1157_0  | Clustered           | 24 VC_1157_0 | 24 | 1      | 1          | 1      | 0 | 0 | 0 | 1 Ref      |
| OK340821 | Unassigned | Unassigned | Unassigned | 1157_0  | Clustered           | 24 VC_1157_0 | 24 | 1      | 1          | 1      | 0 | 0 | 0 | 1 Ref      |



|          |            |            |            |        |           |              |    |        |            |        |   |   |   |            |
|----------|------------|------------|------------|--------|-----------|--------------|----|--------|------------|--------|---|---|---|------------|
| OK340822 | Unassigned | Unassigned | Unassigned | 1157_0 | Clustered | 24 VC_1157_0 | 24 | 1      | 1          | 1      | 0 | 0 | 0 | 1 Ref      |
| OK349506 | Unassigned | Unassigned | Unassigned | 837_0  | Clustered | 29 VC_837_0  | 29 | 0.9955 | 1          | 0.9955 | 0 | 0 | 0 | 1 Ref      |
| OK349510 | Unassigned | Unassigned | Unassigned | 85_4   | Clustered | 3 VC_85_4    | 3  | 0.0294 | 0.98125255 | 0.0288 | 0 | 0 | 0 | 1 Ref      |
| OK412919 | Unassigned | Unassigned | Unassigned | 981_1  | Clustered | 26 VC_981_1  | 26 | 0.7009 | 1          | 0.7009 | 0 | 0 | 0 | 1 Ref      |
| OK428555 | Unassigned | Unassigned | Unassigned | 959_5  | Clustered | 19 VC_959_5  | 19 | 0.2626 | 1          | 0.2626 | 0 | 0 | 0 | 1 Ref      |
| OK428602 | Unassigned | Unassigned | Unassigned | 134_0  | Clustered | 3 VC_134_0   | 3  | 0.0956 | 0.99858494 | 0.0955 | 0 | 0 | 0 | 1 Ref      |
| OK483199 | Unassigned | Unassigned | Unassigned | 904_2  | Clustered | 7 VC_904_2   | 7  | 0.2857 | 1          | 0.2857 | 0 | 0 | 0 | 1 Ref      |
| OK483201 | Unassigned | Unassigned | Unassigned | 882_0  | Clustered | 20 VC_882_0  | 20 | 0.9917 | 1          | 0.9917 | 0 | 0 | 0 | 1 Ref      |
| OK483342 | Unassigned | Unassigned | Unassigned | 328_0  | Clustered | 11 VC_328_0  | 11 | 0.4707 | 1          | 0.4707 | 0 | 0 | 0 | 1 Ref      |
| OK490394 | Unassigned | Unassigned | Unassigned | 229_0  | Clustered | 32 VC_229_0  | 32 | 0.9119 | 1          | 0.9119 | 0 | 0 | 0 | 1 Ref      |
| OK490395 | Unassigned | Unassigned | Unassigned | 6_0    | Clustered | 44 VC_6_0    | 44 | 0.908  | 1          | 0.908  | 0 | 0 | 0 | 1 Ref      |
| OK490396 | Unassigned | Unassigned | Unassigned | 229_0  | Clustered | 32 VC_229_0  | 32 | 0.9119 | 1          | 0.9119 | 0 | 0 | 0 | 1 Ref      |
| OK490397 | Unassigned | Unassigned | Unassigned | 6_0    | Clustered | 44 VC_6_0    | 44 | 0.908  | 1          | 0.908  | 0 | 0 | 0 | 1 Ref      |
| OK490398 | Unassigned | Unassigned | Unassigned | 229_0  | Clustered | 32 VC_229_0  | 32 | 0.9119 | 1          | 0.9119 | 0 | 0 | 0 | 1 Ref      |
| OK490399 | Unassigned | Unassigned | Unassigned | 6_0    | Clustered | 44 VC_6_0    | 44 | 0.908  | 1          | 0.908  | 0 | 0 | 0 | 1 Ref      |
| OK490400 | Unassigned | Unassigned | Unassigned | 229_0  | Clustered | 32 VC_229_0  | 32 | 0.9119 | 1          | 0.9119 | 0 | 0 | 0 | 1 Ref      |
| OK490401 | Unassigned | Unassigned | Unassigned | 6_0    | Clustered | 44 VC_6_0    | 44 | 0.908  | 1          | 0.908  | 0 | 0 | 0 | 1 Ref      |
| OK490402 | Unassigned | Unassigned | Unassigned | 229_0  | Clustered | 32 VC_229_0  | 32 | 0.9119 | 1          | 0.9119 | 0 | 0 | 0 | 1 Ref      |
| OK490403 | Unassigned | Unassigned | Unassigned | 6_0    | Clustered | 44 VC_6_0    | 44 | 0.908  | 1          | 0.908  | 0 | 0 | 0 | 1 Ref      |
| OK490404 | Unassigned | Unassigned | Unassigned | 229_0  | Clustered | 32 VC_229_0  | 32 | 0.9119 | 1          | 0.9119 | 0 | 0 | 0 | 1 Ref      |
| OK490405 | Unassigned | Unassigned | Unassigned | 6_0    | Clustered | 44 VC_6_0    | 44 | 0.908  | 1          | 0.908  | 0 | 0 | 0 | 1 Ref      |
| OK490406 | Unassigned | Unassigned | Unassigned | 229_0  | Clustered | 32 VC_229_0  | 32 | 0.9119 | 1          | 0.9119 | 0 | 0 | 0 | 1 Ref      |
| OK490407 | Unassigned | Unassigned | Unassigned | 6_0    | Clustered | 44 VC_6_0    | 44 | 0.908  | 1          | 0.908  | 0 | 0 | 0 | 1 Ref      |
| OK490408 | Unassigned | Unassigned | Unassigned | 228_0  | Clustered | 60 VC_228_0  | 60 | 0.942  | 1          | 0.942  | 0 | 0 | 0 | 1 Ref      |
| OK490410 | Unassigned | Unassigned | Unassigned | 31_0   | Clustered | 9 VC_31_0    | 9  | 0.3435 | 1          | 0.3435 | 0 | 0 | 0 | 0.6944 Ref |
| OK490411 | Unassigned | Unassigned | Unassigned | 6_0    | Clustered | 44 VC_6_0    | 44 | 0.908  | 1          | 0.908  | 0 | 0 | 0 | 1 Ref      |
| OK490412 | Unassigned | Unassigned | Unassigned | 229_0  | Clustered | 32 VC_229_0  | 32 | 0.9119 | 1          | 0.9119 | 0 | 0 | 0 | 1 Ref      |
| OK490413 | Unassigned | Unassigned | Unassigned | 6_0    | Clustered | 44 VC_6_0    | 44 | 0.908  | 1          | 0.908  | 0 | 0 | 0 | 1 Ref      |
| OK490414 | Unassigned | Unassigned | Unassigned | 229_0  | Clustered | 32 VC_229_0  | 32 | 0.9119 | 1          | 0.9119 | 0 | 0 | 0 | 1 Ref      |
| OK490415 | Unassigned | Unassigned | Unassigned | 31_0   | Clustered | 9 VC_31_0    | 9  | 0.3435 | 1          | 0.3435 | 0 | 0 | 0 | 0.6944 Ref |
| OK490416 | Unassigned | Unassigned | Unassigned | 31_0   | Clustered | 9 VC_31_0    | 9  | 0.3435 | 1          | 0.3435 | 0 | 0 | 0 | 0.6944 Ref |
| OK490417 | Unassigned | Unassigned | Unassigned | 476_0  | Clustered | 19 VC_476_0  | 19 | 0.7814 | 1          | 0.7814 | 0 | 0 | 0 | 1 Ref      |
| OK490418 | Unassigned | Unassigned | Unassigned | 6_0    | Clustered | 44 VC_6_0    | 44 | 0.908  | 1          | 0.908  | 0 | 0 | 0 | 1 Ref      |
| OK490422 | Unassigned | Unassigned | Unassigned | 229_0  | Clustered | 32 VC_229_0  | 32 | 0.9119 | 1          | 0.9119 | 0 | 0 | 0 | 1 Ref      |
| OK490423 | Unassigned | Unassigned | Unassigned | 6_0    | Clustered | 44 VC_6_0    | 44 | 0.908  | 1          | 0.908  | 0 | 0 | 0 | 1 Ref      |
| OK490424 | Unassigned | Unassigned | Unassigned | 229_0  | Clustered | 32 VC_229_0  | 32 | 0.9119 | 1          | 0.9119 | 0 | 0 | 0 | 1 Ref      |
| OK490425 | Unassigned | Unassigned | Unassigned | 6_0    | Clustered | 44 VC_6_0    | 44 | 0.908  | 1          | 0.908  | 0 | 0 | 0 | 1 Ref      |
| OK490426 | Unassigned | Unassigned | Unassigned | 229_0  | Clustered | 32 VC_229_0  | 32 | 0.9119 | 1          | 0.9119 | 0 | 0 | 0 | 1 Ref      |
| OK490427 | Unassigned | Unassigned | Unassigned | 6_0    | Clustered | 44 VC_6_0    | 44 | 0.908  | 1          | 0.908  | 0 | 0 | 0 | 1 Ref      |
| OK490428 | Unassigned | Unassigned | Unassigned | 229_0  | Clustered | 32 VC_229_0  | 32 | 0.9119 | 1          | 0.9119 | 0 | 0 | 0 | 1 Ref      |
| OK490429 | Unassigned | Unassigned | Unassigned | 6_0    | Clustered | 44 VC_6_0    | 44 | 0.908  | 1          | 0.908  | 0 | 0 | 0 | 1 Ref      |
| OK490430 | Unassigned | Unassigned | Unassigned | 244_0  | Clustered | 12 VC_244_0  | 12 | 0.4039 | 1          | 0.4039 | 0 | 0 | 0 | 1 Ref      |
| OK490431 | Unassigned | Unassigned | Unassigned | 6_0    | Clustered | 44 VC_6_0    | 44 | 0.908  | 1          | 0.908  | 0 | 0 | 0 | 1 Ref      |
| OK490432 | Unassigned | Unassigned | Unassigned | 229_0  | Clustered | 32 VC_229_0  | 32 | 0.9119 | 1          | 0.9119 | 0 | 0 | 0 | 1 Ref      |
| OK490433 | Unassigned | Unassigned | Unassigned | 244_0  | Clustered | 12 VC_244_0  | 12 | 0.4039 | 1          | 0.4039 | 0 | 0 | 0 | 1 Ref      |
| OK490434 | Unassigned | Unassigned | Unassigned | 6_0    | Clustered | 44 VC_6_0    | 44 | 0.908  | 1          | 0.908  | 0 | 0 | 0 | 1 Ref      |
| OK490435 | Unassigned | Unassigned | Unassigned | 229_0  | Clustered | 32 VC_229_0  | 32 | 0.9119 | 1          | 0.9119 | 0 | 0 | 0 | 1 Ref      |
| OK490436 | Unassigned | Unassigned | Unassigned | 6_0    | Clustered | 44 VC_6_0    | 44 | 0.908  | 1          | 0.908  | 0 | 0 | 0 | 1 Ref      |
| OK490437 | Unassigned | Unassigned | Unassigned | 229_0  | Clustered | 32 VC_229_0  | 32 | 0.9119 | 1          | 0.9119 | 0 | 0 | 0 | 1 Ref      |
| OK490438 | Unassigned | Unassigned | Unassigned | 244_0  | Clustered | 12 VC_244_0  | 12 | 0.4039 | 1          | 0.4039 | 0 | 0 | 0 | 1 Ref      |
| OK490439 | Unassigned | Unassigned | Unassigned | 6_0    | Clustered | 44 VC_6_0    | 44 | 0.908  | 1          | 0.908  | 0 | 0 | 0 | 1 Ref      |
| OK490440 | Unassigned | Unassigned | Unassigned | 229_0  | Clustered | 32 VC_229_0  | 32 | 0.9119 | 1          | 0.9119 | 0 | 0 | 0 | 1 Ref      |
| OK490441 | Unassigned | Unassigned | Unassigned | 244_0  | Clustered | 12 VC_244_0  | 12 | 0.4039 | 1          | 0.4039 | 0 | 0 | 0 | 1 Ref      |
| OK490442 | Unassigned | Unassigned | Unassigned | 6_0    | Clustered | 44 VC_6_0    | 44 | 0.908  | 1          | 0.908  | 0 | 0 | 0 | 1 Ref      |
| OK490443 | Unassigned | Unassigned | Unassigned | 229_0  | Clustered | 32 VC_229_0  | 32 | 0.9119 | 1          | 0.9119 | 0 | 0 | 0 | 1 Ref      |
| OK490444 | Unassigned | Unassigned | Unassigned | 244_0  | Clustered | 12 VC_244_0  | 12 | 0.4039 | 1          | 0.4039 | 0 | 0 | 0 | 1 Ref      |
| OK490445 | Unassigned | Unassigned | Unassigned | 6_0    | Clustered | 44 VC_6_0    | 44 | 0.908  | 1          | 0.908  | 0 | 0 | 0 | 1 Ref      |
| OK490446 | Unassigned | Unassigned | Unassigned | 229_0  | Clustered | 32 VC_229_0  | 32 | 0.9119 | 1          | 0.9119 | 0 | 0 | 0 | 1 Ref      |
| OK490447 | Unassigned | Unassigned | Unassigned | 244_0  | Clustered | 12 VC_244_0  | 12 | 0.4039 | 1          | 0.4039 | 0 | 0 | 0 | 1 Ref      |
| OK490448 | Unassigned | Unassigned | Unassigned | 6_0    | Clustered | 44 VC_6_0    | 44 | 0.908  | 1          | 0.908  | 0 | 0 | 0 | 1 Ref      |
| OK490449 | Unassigned | Unassigned | Unassigned | 229_0  | Clustered | 32 VC_229_0  | 32 | 0.9119 | 1          | 0.9119 | 0 | 0 | 0 | 1 Ref      |
| OK490450 | Unassigned | Unassigned | Unassigned | 244_0  | Clustered | 12 VC_244_0  | 12 | 0.4039 | 1          | 0.4039 | 0 | 0 | 0 | 1 Ref      |
| OK490451 | Unassigned | Unassigned | Unassigned | 244_0  | Clustered | 12 VC_244_0  | 12 | 0.4039 | 1          | 0.4039 | 0 | 0 | 0 | 1 Ref      |
| OK490452 | Unassigned | Unassigned | Unassigned | 6_0    | Clustered | 44 VC_6_0    | 44 | 0.908  | 1          | 0.908  | 0 | 0 | 0 | 1 Ref      |
| OK490453 | Unassigned | Unassigned | Unassigned | 229_0  | Clustered | 32 VC_229_0  | 32 | 0.9119 | 1          | 0.9119 | 0 | 0 | 0 | 1 Ref      |
| OK490454 | Unassigned | Unassigned | Unassigned | 244_0  | Clustered | 12 VC_244_0  | 12 | 0.4039 | 1          | 0.4039 | 0 | 0 | 0 | 1 Ref      |
| OK490455 | Unassigned | Unassigned | Unassigned | 6_0    | Clustered | 44 VC_6_0    | 44 | 0.908  | 1          | 0.908  | 0 | 0 | 0 | 1 Ref      |
| OK490456 | Unassigned | Unassigned | Unassigned | 229_0  | Clustered | 32 VC_229_0  | 32 | 0.9119 | 1          | 0.9119 | 0 | 0 | 0 | 1 Ref      |
| OK490457 | Unassigned | Unassigned | Unassigned | 6_0    | Clustered | 44 VC_6_0    | 44 | 0.908  | 1          | 0.908  | 0 | 0 | 0 | 1 Ref      |
| OK490458 | Unassigned | Unassigned | Unassigned | 244_0  | Clustered | 12 VC_244_0  | 12 | 0.4039 | 1          | 0.4039 | 0 | 0 | 0 | 1 Ref      |
| OK490459 | Unassigned | Unassigned | Unassigned | 229_0  | Clustered | 32 VC_229_0  | 32 | 0.9119 | 1          | 0.9119 | 0 | 0 | 0 | 1 Ref      |
| OK490460 | Unassigned | Unassigned | Unassigned | 60_0   | Clustered | 5 VC_60_0    | 5  | 0.4237 | 0.99999997 | 0.4237 | 0 | 0 | 0 | 1 Ref      |
| OK490461 | Unassigned | Unassigned | Unassigned | 228_0  | Clustered | 60 VC_228_0  | 60 | 0.942  | 1          | 0.942  | 0 | 0 | 0 | 1 Ref      |
| OK490463 | Unassigned | Unassigned | Unassigned | 60_0   | Clustered | 5 VC_60_0    | 5  | 0.4237 | 0.99999997 | 0.4237 | 0 | 0 | 0 | 1 Ref      |
| OK490464 | Unassigned | Unassigned | Unassigned | 228_0  | Clustered | 60 VC_228_0  | 60 | 0.942  | 1          | 0.942  | 0 | 0 | 0 | 1 Ref      |
| OK490466 | Unassigned | Unassigned | Unassigned | 60_0   | Clustered | 5 VC_60_0    | 5  | 0.4237 | 0.99999997 | 0.4237 | 0 | 0 | 0 | 1 Ref      |
| OK490467 | Unassigned | Unassigned | Unassigned | 228_0  | Clustered | 60 VC_228_0  | 60 | 0.942  | 1          | 0.942  | 0 | 0 | 0 | 1 Ref      |
| OK490469 | Unassigned | Unassigned | Unassigned | 60_0   | Clustered | 5 VC_60_0    | 5  | 0.4237 | 0.99999997 | 0.4237 | 0 | 0 | 0 | 1 Ref      |
| OK490470 | Unassigned | Unassigned | Unassigned | 228_0  | Clustered | 60 VC_228_0  | 60 | 0.942  | 1          | 0.942  | 0 | 0 | 0 | 1 Ref      |
| OK490472 | Unassigned | Unassigned | Unassigned | 60_0   | Clustered | 5 VC_60_0    | 5  | 0.4237 | 0.99999997 | 0.4237 | 0 | 0 | 0 | 1 Ref      |
| OK490473 | Unassigned | Unassigned | Unassigned | 228_0  | Clustered | 60 VC_228_0  | 60 | 0.942  | 1          | 0.942  | 0 | 0 | 0 | 1 Ref      |



|          |            |            |            |         |                     |              |    |        |            |        |   |   |   |            |
|----------|------------|------------|------------|---------|---------------------|--------------|----|--------|------------|--------|---|---|---|------------|
| OK499971 | Unassigned | Unassigned | Unassigned | 31_1    | Clustered/Singleton | 1 VC_31_1    | 1  | 0      | 1          | 0      | 0 | 0 | 0 | 1 Ref      |
| OK499972 | Unassigned | Unassigned | Unassigned | 475_1   | Clustered           | 3 VC_475_1   | 3  | 0.0582 | 0.98866009 | 0.0575 | 0 | 0 | 0 | 1 Ref      |
| OK499973 | Unassigned | Unassigned | Unassigned | 584_0   | Clustered           | 28 VC_584_0  | 28 | 0.7704 | 1          | 0.7704 | 0 | 0 | 0 | 1 Ref      |
| OK499974 | Unassigned | Unassigned | Unassigned | 591_0   | Clustered           | 14 VC_591_0  | 14 | 0.5184 | 1          | 0.5184 | 0 | 0 | 0 | 1 Ref      |
| OK499975 | Unassigned | Unassigned | Unassigned | 591_0   | Clustered           | 14 VC_591_0  | 14 | 0.5184 | 1          | 0.5184 | 0 | 0 | 0 | 1 Ref      |
| OK499976 | Unassigned | Unassigned | Unassigned | 883_1   | Clustered           | 12 VC_883_1  | 12 | 0.2441 | 1          | 0.2441 | 0 | 0 | 0 | 1 Ref      |
| OK499977 | Unassigned | Unassigned | Unassigned | 187_0   | Clustered           | 4 VC_187_0   | 4  | 0.0661 | 0.99994098 | 0.0661 | 0 | 0 | 0 | 1 Ref      |
| OK499978 | Unassigned | Unassigned | Unassigned | 123_0   | Clustered           | 23 VC_123_0  | 23 | 0.817  | 1          | 0.817  | 0 | 0 | 0 | 1 Ref      |
| OK499979 | Unassigned | Unassigned | Unassigned | 704_0   | Clustered           | 16 VC_704_0  | 16 | 0.7274 | 1          | 0.7274 | 0 | 0 | 0 | 1 Ref      |
| OK499980 | Unassigned | Unassigned | Unassigned | 491_0   | Clustered           | 36 VC_491_0  | 36 | 0.5336 | 1          | 0.5336 | 0 | 0 | 0 | 0.9714 Ref |
| OK499981 | Unassigned | Unassigned | Unassigned | 491_0   | Clustered           | 36 VC_491_0  | 36 | 0.5336 | 1          | 0.5336 | 0 | 0 | 0 | 0.9714 Ref |
| OK499982 | Unassigned | Unassigned | Unassigned | 390_0   | Clustered           | 4 VC_390_0   | 4  | 0.0468 | 0.9999882  | 0.0468 | 0 | 0 | 0 | 1 Ref      |
| OK499983 | Unassigned | Unassigned | Unassigned | 187_0   | Clustered           | 4 VC_187_0   | 4  | 0.0661 | 0.99994098 | 0.0661 | 0 | 0 | 0 | 1 Ref      |
| OK499984 | Unassigned | Unassigned | Unassigned | 584_0   | Clustered           | 28 VC_584_0  | 28 | 0.7704 | 1          | 0.7704 | 0 | 0 | 0 | 1 Ref      |
| OK499985 | Unassigned | Unassigned | Unassigned | 835_0   | Clustered           | 67 VC_835_0  | 67 | 0.9624 | 1          | 0.9624 | 0 | 0 | 0 | 1 Ref      |
| OK499986 | Unassigned | Unassigned | Unassigned | 591_0   | Clustered           | 14 VC_591_0  | 14 | 0.5184 | 1          | 0.5184 | 0 | 0 | 0 | 1 Ref      |
| OK499987 | Unassigned | Unassigned | Unassigned | 475_1   | Clustered           | 3 VC_475_1   | 3  | 0.0582 | 0.98866009 | 0.0575 | 0 | 0 | 0 | 1 Ref      |
| OK499988 | Unassigned | Unassigned | Unassigned | 835_0   | Clustered           | 67 VC_835_0  | 67 | 0.9624 | 1          | 0.9624 | 0 | 0 | 0 | 1 Ref      |
| OK499989 | Unassigned | Unassigned | Unassigned | 288_0   | Clustered           | 3 VC_288_0   | 3  | 0.042  | 0.99856109 | 0.042  | 0 | 0 | 0 | 1 Ref      |
| OK499990 | Unassigned | Unassigned | Unassigned | 883_1   | Clustered           | 12 VC_883_1  | 12 | 0.2441 | 1          | 0.2441 | 0 | 0 | 0 | 1 Ref      |
| OK499991 | Unassigned | Unassigned | Unassigned | 475_8   | Clustered           | 2 VC_475_8   | 2  | 0.0291 | 0.90184699 | 0.0262 | 0 | 0 | 0 | 1 Ref      |
| OK499992 | Unassigned | Unassigned | Unassigned | 475_10  | Clustered           | 2 VC_475_10  | 2  | 0.0285 | 0.87721192 | 0.025  | 0 | 0 | 0 | 1 Ref      |
| OK499993 | Unassigned | Unassigned | Unassigned | 835_0   | Clustered           | 67 VC_835_0  | 67 | 0.9624 | 1          | 0.9624 | 0 | 0 | 0 | 1 Ref      |
| OK499994 | Unassigned | Unassigned | Unassigned | 475_1   | Clustered           | 3 VC_475_1   | 3  | 0.0582 | 0.98866009 | 0.0575 | 0 | 0 | 0 | 1 Ref      |
| OK499995 | Unassigned | Unassigned | Unassigned | 966_0   | Clustered           | 3 VC_966_0   | 3  | 0.3549 | 0.99840333 | 0.3543 | 0 | 0 | 0 | 1 Ref      |
| OK499996 | Unassigned | Unassigned | Unassigned | 491_0   | Clustered           | 36 VC_491_0  | 36 | 0.5336 | 1          | 0.5336 | 0 | 0 | 0 | 0.9714 Ref |
| OK499997 | Unassigned | Unassigned | Unassigned | 491_0   | Clustered           | 36 VC_491_0  | 36 | 0.5336 | 1          | 0.5336 | 0 | 0 | 0 | 0.9714 Ref |
| OK499998 | Unassigned | Unassigned | Unassigned | 591_0   | Clustered           | 14 VC_591_0  | 14 | 0.5184 | 1          | 0.5184 | 0 | 0 | 0 | 1 Ref      |
| OK499999 | Unassigned | Unassigned | Unassigned | 704_0   | Clustered           | 16 VC_704_0  | 16 | 0.7274 | 1          | 0.7274 | 0 | 0 | 0 | 1 Ref      |
| OK500000 | Unassigned | Unassigned | Unassigned | 591_0   | Clustered           | 14 VC_591_0  | 14 | 0.5184 | 1          | 0.5184 | 0 | 0 | 0 | 1 Ref      |
| OK500001 | Unassigned | Unassigned | Unassigned | 884_0   | Clustered           | 28 VC_884_0  | 28 | 0.6211 | 1          | 0.6211 | 0 | 0 | 0 | 0.9841 Ref |
| OK523998 | Unassigned | Unassigned | Unassigned | 129_0   | Clustered           | 43 VC_129_0  | 43 | 0.886  | 1          | 0.886  | 0 | 0 | 0 | 1 Ref      |
| OK523999 | Unassigned | Unassigned | Unassigned | 129_0   | Clustered           | 43 VC_129_0  | 43 | 0.886  | 1          | 0.886  | 0 | 0 | 0 | 1 Ref      |
| OK539620 | Unassigned | Unassigned | Unassigned | 638_0   | Clustered           | 45 VC_638_0  | 45 | 0.7741 | 1          | 0.7741 | 0 | 0 | 0 | 1 Ref      |
| OK539824 | Unassigned | Unassigned | Unassigned | 423_0   | Clustered           | 45 VC_423_0  | 45 | 0.9484 | 1          | 0.9484 | 0 | 0 | 0 | 1 Ref      |
| OK539825 | Unassigned | Unassigned | Unassigned | 749_0   | Clustered           | 40 VC_749_0  | 40 | 0.7517 | 1          | 0.7517 | 0 | 0 | 0 | 1 Ref      |
| OK539826 | Unassigned | Unassigned | Unassigned | 76_0    | Clustered           | 37 VC_76_0   | 37 | 0.9403 | 1          | 0.9403 | 0 | 0 | 0 | 1 Ref      |
| OK539913 | Unassigned | Unassigned | Unassigned | 330_0   | Clustered           | 27 VC_330_0  | 27 | 0.5088 | 1          | 0.5088 | 0 | 0 | 0 | 0.8661 Ref |
| OK546191 | Unassigned | Unassigned | Unassigned | 699_0   | Clustered           | 71 VC_699_0  | 71 | 0.9352 | 1          | 0.9352 | 0 | 0 | 0 | 1 Ref      |
| OK562429 | Unassigned | Unassigned | Unassigned | 111_0   | Clustered           | 91 VC_111_0  | 91 | 0.9587 | 1          | 0.9587 | 0 | 0 | 0 | 1 Ref      |
| OK570184 | Unassigned | Unassigned | Unassigned | 453_0   | Clustered           | 6 VC_453_0   | 6  | 0.114  | 1          | 0.114  | 0 | 0 | 0 | 1 Ref      |
| OK570186 | Unassigned | Unassigned | Unassigned | 846_0   | Clustered           | 2 VC_846_0   | 2  | 0.5455 | 0.92357512 | 0.5038 | 0 | 0 | 0 | 1 Ref      |
| OK570375 | Unassigned | Unassigned | Unassigned | 283_102 | Clustered/Singleton | 1 VC_283_102 | 1  | 0      | 1          | 0      | 0 | 0 | 0 | 1 Ref      |
| OK583892 | Unassigned | Unassigned | Unassigned | 111_0   | Clustered           | 91 VC_111_0  | 91 | 0.9587 | 1          | 0.9587 | 0 | 0 | 0 | 1 Ref      |
| OK583893 | Unassigned | Unassigned | Unassigned | 111_0   | Clustered           | 91 VC_111_0  | 91 | 0.9587 | 1          | 0.9587 | 0 | 0 | 0 | 1 Ref      |
| OK585158 | Unassigned | Unassigned | Unassigned | 837_0   | Clustered           | 29 VC_837_0  | 29 | 0.9955 | 1          | 0.9955 | 0 | 0 | 0 | 1 Ref      |
| OK585159 | Unassigned | Unassigned | Unassigned | 837_0   | Clustered           | 29 VC_837_0  | 29 | 0.9955 | 1          | 0.9955 | 0 | 0 | 0 | 1 Ref      |
| OK585160 | Unassigned | Unassigned | Unassigned | 837_0   | Clustered           | 29 VC_837_0  | 29 | 0.9955 | 1          | 0.9955 | 0 | 0 | 0 | 1 Ref      |
| OK625527 | Unassigned | Unassigned | Unassigned | 452_0   | Clustered           | 66 VC_452_0  | 66 | 0.9248 | 1          | 0.9248 | 0 | 0 | 0 | 1 Ref      |
| OK625546 | Unassigned | Unassigned | Unassigned | 882_0   | Clustered           | 20 VC_882_0  | 20 | 0.9917 | 1          | 0.9917 | 0 | 0 | 0 | 1 Ref      |
| OK631811 | Unassigned | Unassigned | Unassigned | 491_0   | Clustered           | 36 VC_491_0  | 36 | 0.5336 | 1          | 0.5336 | 0 | 0 | 0 | 0.9714 Ref |
| OK631812 | Unassigned | Unassigned | Unassigned | 668_0   | Clustered           | 25 VC_668_0  | 25 | 0.5539 | 1          | 0.5539 | 0 | 0 | 0 | 0.96 Ref   |
| OK631813 | Unassigned | Unassigned | Unassigned | 668_0   | Clustered           | 25 VC_668_0  | 25 | 0.5539 | 1          | 0.5539 | 0 | 0 | 0 | 0.96 Ref   |
| OK632025 | Unassigned | Unassigned | Unassigned | 831_0   | Clustered           | 5 VC_831_0   | 5  | 0.4369 | 0.99999952 | 0.4369 | 0 | 0 | 0 | 1 Ref      |
| OK638201 | Unassigned | Unassigned | Unassigned | 1028_0  | Clustered           | 8 VC_1028_0  | 8  | 0.9323 | 1          | 0.9323 | 0 | 0 | 0 | 1 Ref      |
| OK638202 | Unassigned | Unassigned | Unassigned | 1028_0  | Clustered           | 8 VC_1028_0  | 8  | 0.9323 | 1          | 0.9323 | 0 | 0 | 0 | 1 Ref      |
| OK638203 | Unassigned | Unassigned | Unassigned | 1028_0  | Clustered           | 8 VC_1028_0  | 8  | 0.9323 | 1          | 0.9323 | 0 | 0 | 0 | 1 Ref      |
| OK649958 | Unassigned | Unassigned | Unassigned | 310_0   | Clustered           | 33 VC_310_0  | 33 | 0.8771 | 1          | 0.8771 | 0 | 0 | 0 | 1 Ref      |
| OK655936 | Unassigned | Unassigned | Unassigned | 938_0   | Clustered           | 99 VC_938_0  | 99 | 0.9119 | 1          | 0.9119 | 0 | 0 | 0 | 0.9928 Ref |
| OK663600 | Unassigned | Unassigned | Unassigned | 386_0   | Clustered           | 49 VC_386_0  | 49 | 0.7941 | 1          | 0.7941 | 0 | 0 | 0 | 1 Ref      |
| OK665488 | Unassigned | Unassigned | Unassigned | 838_0   | Clustered           | 29 VC_838_0  | 29 | 0.8611 | 1          | 0.8611 | 0 | 0 | 0 | 1 Ref      |
| OK665835 | Unassigned | Unassigned | Unassigned | 190_28  | Clustered           | 5 VC_190_28  | 5  | 0.0304 | 0.99999994 | 0.0304 | 0 | 0 | 0 | 1 Ref      |
| OK665842 | Unassigned | Unassigned | Unassigned | 242_1   | Clustered           | 20 VC_242_1  | 20 | 0.684  | 1          | 0.684  | 0 | 0 | 0 | 0.8368 Ref |
| OK905446 | Unassigned | Unassigned | Unassigned | 531_1   | Clustered           | 6 VC_531_1   | 6  | 0.1481 | 0.99978665 | 0.148  | 0 | 0 | 0 | 1 Ref      |
| OK913679 | Unassigned | Unassigned | Unassigned | 116_0   | Clustered           | 13 VC_116_0  | 13 | 1      | 1          | 1      | 0 | 0 | 0 | 1 Ref      |
| OK913680 | Unassigned | Unassigned | Unassigned | 116_0   | Clustered           | 13 VC_116_0  | 13 | 1      | 1          | 1      | 0 | 0 | 0 | 1 Ref      |
| OK999978 | Unassigned | Unassigned | Unassigned | 514_0   | Clustered           | 75 VC_514_0  | 75 | 0.9402 | 1          | 0.9402 | 0 | 0 | 0 | 1 Ref      |
| OK999979 | Unassigned | Unassigned | Unassigned | 1234_0  | Clustered           | 44 VC_1234_0 | 44 | 1      | 1          | 1      | 0 | 0 | 0 | 1 Ref      |
| OK999980 | Unassigned | Unassigned | Unassigned | 1073_0  | Clustered           | 24 VC_1073_0 | 24 | 0.8388 | 1          | 0.8388 | 0 | 0 | 0 | 1 Ref      |
| OK999981 | Unassigned | Unassigned | Unassigned | 1234_0  | Clustered           | 44 VC_1234_0 | 44 | 1      | 1          | 1      | 0 | 0 | 0 | 1 Ref      |
| OL310488 | Unassigned | Unassigned | Unassigned | 283_104 | Clustered/Singleton | 1 VC_283_104 | 1  | 0      | 1          | 0      | 0 | 0 | 0 | 1 Ref      |
| OL314400 | Unassigned | Unassigned | Unassigned | 882_0   | Clustered           | 20 VC_882_0  | 20 | 0.9917 | 1          | 0.9917 | 0 | 0 | 0 | 1 Ref      |
| OL343755 | Unassigned | Unassigned | Unassigned | 1028_0  | Clustered           | 8 VC_1028_0  | 8  | 0.9323 | 1          | 0.9323 | 0 | 0 | 0 | 1 Ref      |
| OL362041 | Unassigned | Unassigned | Unassigned | 283_123 | Clustered/Singleton | 1 VC_283_123 | 1  | 0      | 1          | 0      | 0 | 0 | 0 | 1 Ref      |
| OL362268 | Unassigned | Unassigned | Unassigned | 79_0    | Clustered           | 64 VC_79_0   | 64 | 0.4185 | 1          | 0.4185 | 0 | 0 | 0 | 0.7649 Ref |
| OL362269 | Unassigned | Unassigned | Unassigned | 79_0    | Clustered           | 64 VC_79_0   | 64 | 0.4185 | 1          | 0.4185 | 0 | 0 | 0 | 0.7649 Ref |
| OL362270 | Unassigned | Unassigned | Unassigned | 878_0   | Clustered           | 32 VC_878_0  | 32 | 0.9965 | 1          | 0.9965 | 0 | 0 | 0 | 1 Ref      |
| OL362272 | Unassigned | Unassigned | Unassigned | 452_0   | Clustered           | 66 VC_452_0  | 66 | 0.9248 | 1          | 0.9248 | 0 | 0 | 0 | 1 Ref      |
| OL362273 | Unassigned | Unassigned | Unassigned | 452_0   | Clustered           | 66 VC_452_0  | 66 | 0.9248 | 1          | 0.9248 | 0 | 0 | 0 | 1 Ref      |
| OL362274 | Unassigned | Unassigned | Unassigned | 461_0   | Clustered           | 96 VC_461_0  | 96 | 0.9307 | 1          | 0.9307 | 0 | 0 | 0 | 0.9575 Ref |
| OL362275 | Unassigned | Unassigned | Unassigned | 451_0   | Clustered           | 80 VC_451_0  | 80 | 0.9991 | 1          | 0.9991 | 0 | 0 | 0 | 1 Ref      |



|          |            |            |            |        |                     |              |     |        |            |        |   |   |   |            |
|----------|------------|------------|------------|--------|---------------------|--------------|-----|--------|------------|--------|---|---|---|------------|
| OL362276 | Unassigned | Unassigned | Unassigned | 451_0  | Clustered           | 80 VC_451_0  | 80  | 0.9991 | 1          | 0.9991 | 0 | 0 | 0 | 1 Ref      |
| OL362277 | Unassigned | Unassigned | Unassigned | 460_0  | Clustered           | 19 VC_460_0  | 19  | 0.3744 | 1          | 0.3744 | 0 | 0 | 0 | 1 Ref      |
| OL362278 | Unassigned | Unassigned | Unassigned | 111_0  | Clustered           | 91 VC_111_0  | 91  | 0.9587 | 1          | 0.9587 | 0 | 0 | 0 | 1 Ref      |
| OL362279 | Unassigned | Unassigned | Unassigned | 111_0  | Clustered           | 91 VC_111_0  | 91  | 0.9587 | 1          | 0.9587 | 0 | 0 | 0 | 1 Ref      |
| OL362280 | Unassigned | Unassigned | Unassigned | 149_8  | Clustered           | 66 VC_149_8  | 66  | 0.4565 | 1          | 0.4565 | 0 | 0 | 0 | 0.8182 Ref |
| OL362281 | Unassigned | Unassigned | Unassigned | 385_0  | Clustered           | 51 VC_385_0  | 51  | 0.8754 | 1          | 0.8754 | 0 | 0 | 0 | 1 Ref      |
| OL362282 | Unassigned | Unassigned | Unassigned | 385_0  | Clustered           | 51 VC_385_0  | 51  | 0.8754 | 1          | 0.8754 | 0 | 0 | 0 | 1 Ref      |
| OL362283 | Unassigned | Unassigned | Unassigned | 385_0  | Clustered           | 51 VC_385_0  | 51  | 0.8754 | 1          | 0.8754 | 0 | 0 | 0 | 1 Ref      |
| OL396571 | Unassigned | Unassigned | Unassigned | 37_1   | Clustered           | 3 VC_37_1    | 3   | 0.0833 | 0.9484635  | 0.079  | 0 | 0 | 0 | 1 Ref      |
| OL409034 | Unassigned | Unassigned | Unassigned | 823_0  | Clustered           | 124 VC_823_0 | 124 | 0.9492 | 1          | 0.9492 | 0 | 0 | 0 | 1 Ref      |
| OL416096 | Unassigned | Unassigned | Unassigned | 112_0  | Clustered           | 8 VC_112_0   | 8   | 0.2537 | 1          | 0.2537 | 0 | 0 | 0 | 1 Ref      |
| OL436139 | Unassigned | Unassigned | Unassigned | 637_0  | Clustered           | 115 VC_637_0 | 115 | 0.731  | 1          | 0.731  | 0 | 0 | 0 | 0.8764 Ref |
| OL441337 | Unassigned | Unassigned | Unassigned | 472_0  | Clustered           | 47 VC_472_0  | 47  | 0.9025 | 1          | 0.9025 | 0 | 0 | 0 | 1 Ref      |
| OL451225 | Unassigned | Unassigned | Unassigned | 290_1  | Clustered           | 8 VC_290_1   | 8   | 0.0757 | 1          | 0.0757 | 0 | 0 | 0 | 0.8571 Ref |
| OL451946 | Unassigned | Unassigned | Unassigned | 191_15 | Clustered           | 2 VC_191_15  | 2   | 0.0057 | 0.93631009 | 0.0053 | 0 | 0 | 0 | 1 Ref      |
| OL455887 | Unassigned | Unassigned | Unassigned | 572_0  | Clustered           | 16 VC_572_0  | 16  | 0.7286 | 1          | 0.7286 | 0 | 0 | 0 | 1 Ref      |
| OL455888 | Unassigned | Unassigned | Unassigned | 919_0  | Clustered           | 39 VC_919_0  | 39  | 0.9069 | 1          | 0.9069 | 0 | 0 | 0 | 1 Ref      |
| OL455889 | Unassigned | Unassigned | Unassigned | 940_0  | Clustered           | 34 VC_940_0  | 34  | 0.7959 | 1          | 0.7959 | 0 | 0 | 0 | 1 Ref      |
| OL455890 | Unassigned | Unassigned | Unassigned | 572_0  | Clustered           | 16 VC_572_0  | 16  | 0.7286 | 1          | 0.7286 | 0 | 0 | 0 | 1 Ref      |
| OL455891 | Unassigned | Unassigned | Unassigned | 982_0  | Clustered           | 62 VC_982_0  | 62  | 0.8646 | 1          | 0.8646 | 0 | 0 | 0 | 0.743 Ref  |
| OL455892 | Unassigned | Unassigned | Unassigned | 1440_0 | Clustered           | 4 VC_1440_0  | 4   | 1      | 1          | 1      | 0 | 0 | 0 | 1 Ref      |
| OL455893 | Unassigned | Unassigned | Unassigned | 372_2  | Clustered           | 5 VC_372_2   | 5   | 0.072  | 0.99999997 | 0.072  | 0 | 0 | 0 | 0.9 Ref    |
| OL455894 | Unassigned | Unassigned | Unassigned | 982_0  | Clustered           | 62 VC_982_0  | 62  | 0.8646 | 1          | 0.8646 | 0 | 0 | 0 | 0.743 Ref  |
| OL455895 | Unassigned | Unassigned | Unassigned | 572_0  | Clustered           | 16 VC_572_0  | 16  | 0.7286 | 1          | 0.7286 | 0 | 0 | 0 | 1 Ref      |
| OL455896 | Unassigned | Unassigned | Unassigned | 1207_0 | Clustered           | 29 VC_1207_0 | 29  | 0.8225 | 1          | 0.8225 | 0 | 0 | 0 | 1 Ref      |
| OL455897 | Unassigned | Unassigned | Unassigned | 1224_0 | Clustered           | 19 VC_1224_0 | 19  | 1      | 1          | 1      | 0 | 0 | 0 | 1 Ref      |
| OL455898 | Unassigned | Unassigned | Unassigned | 325_62 | Clustered           | 3 VC_325_62  | 3   | 0.0188 | 0.99859194 | 0.0188 | 0 | 0 | 0 | 1 Ref      |
| OL455899 | Unassigned | Unassigned | Unassigned | 888_0  | Clustered           | 28 VC_888_0  | 28  | 0.5497 | 1          | 0.5497 | 0 | 0 | 0 | 1 Ref      |
| OL473897 | Unassigned | Unassigned | Unassigned | 1028_0 | Clustered           | 8 VC_1028_0  | 8   | 0.9323 | 1          | 0.9323 | 0 | 0 | 0 | 1 Ref      |
| OL474125 | Unassigned | Unassigned | Unassigned | 111_0  | Clustered           | 91 VC_111_0  | 91  | 0.9587 | 1          | 0.9587 | 0 | 0 | 0 | 1 Ref      |
| OL474141 | Unassigned | Unassigned | Unassigned | 329_11 | Clustered           | 15 VC_329_11 | 15  | 0.0791 | 1          | 0.0791 | 0 | 0 | 0 | 0.9333 Ref |
| OL502173 | Unassigned | Unassigned | Unassigned | 191_15 | Clustered           | 2 VC_191_15  | 2   | 0.0057 | 0.93631009 | 0.0053 | 0 | 0 | 0 | 1 Ref      |
| OL505078 | Unassigned | Unassigned | Unassigned | 847_1  | Clustered           | 26 VC_847_1  | 26  | 0.6323 | 1          | 0.6323 | 0 | 0 | 0 | 0.9815 Ref |
| OL505084 | Unassigned | Unassigned | Unassigned | 695_0  | Clustered           | 48 VC_695_0  | 48  | 0.8162 | 1          | 0.8162 | 0 | 0 | 0 | 1 Ref      |
| OL505085 | Unassigned | Unassigned | Unassigned | 108_0  | Clustered           | 33 VC_108_0  | 33  | 0.949  | 1          | 0.949  | 0 | 0 | 0 | 1 Ref      |
| OL519842 | Unassigned | Unassigned | Unassigned | 839_0  | Clustered           | 5 VC_839_0   | 5   | 0.165  | 0.99999995 | 0.165  | 0 | 0 | 0 | 1 Ref      |
| OL519843 | Unassigned | Unassigned | Unassigned | 637_0  | Clustered           | 115 VC_637_0 | 115 | 0.731  | 1          | 0.731  | 0 | 0 | 0 | 0.8764 Ref |
| OL519844 | Unassigned | Unassigned | Unassigned | 838_0  | Clustered           | 29 VC_838_0  | 29  | 0.8611 | 1          | 0.8611 | 0 | 0 | 0 | 1 Ref      |
| OL539438 | Unassigned | Unassigned | Unassigned | 1346_0 | Clustered           | 10 VC_1346_0 | 10  | 0.7784 | 1          | 0.7784 | 0 | 0 | 0 | 1 Ref      |
| OL539439 | Unassigned | Unassigned | Unassigned | 1346_0 | Clustered           | 10 VC_1346_0 | 10  | 0.7784 | 1          | 0.7784 | 0 | 0 | 0 | 1 Ref      |
| OL539440 | Unassigned | Unassigned | Unassigned | 836_0  | Clustered           | 9 VC_836_0   | 9   | 0.7733 | 1          | 0.7733 | 0 | 0 | 0 | 1 Ref      |
| OL539442 | Unassigned | Unassigned | Unassigned | 1346_0 | Clustered           | 10 VC_1346_0 | 10  | 0.7784 | 1          | 0.7784 | 0 | 0 | 0 | 1 Ref      |
| OL539443 | Unassigned | Unassigned | Unassigned | 584_0  | Clustered           | 28 VC_584_0  | 28  | 0.7704 | 1          | 0.7704 | 0 | 0 | 0 | 1 Ref      |
| OL539444 | Unassigned | Unassigned | Unassigned | 584_0  | Clustered           | 28 VC_584_0  | 28  | 0.7704 | 1          | 0.7704 | 0 | 0 | 0 | 1 Ref      |
| OL539445 | Unassigned | Unassigned | Unassigned | 942_0  | Clustered           | 36 VC_942_0  | 36  | 0.7848 | 1          | 0.7848 | 0 | 0 | 0 | 1 Ref      |
| OL539446 | Unassigned | Unassigned | Unassigned | 942_0  | Clustered           | 36 VC_942_0  | 36  | 0.7848 | 1          | 0.7848 | 0 | 0 | 0 | 1 Ref      |
| OL539447 | Unassigned | Unassigned | Unassigned | 455_0  | Clustered           | 18 VC_455_0  | 18  | 0.4598 | 1          | 0.4598 | 0 | 0 | 0 | 1 Ref      |
| OL539448 | Unassigned | Unassigned | Unassigned | 938_0  | Clustered           | 99 VC_938_0  | 99  | 0.9119 | 1          | 0.9119 | 0 | 0 | 0 | 0.9928 Ref |
| OL539449 | Unassigned | Unassigned | Unassigned | 695_0  | Clustered           | 48 VC_695_0  | 48  | 0.8162 | 1          | 0.8162 | 0 | 0 | 0 | 1 Ref      |
| OL539450 | Unassigned | Unassigned | Unassigned | 937_0  | Clustered           | 40 VC_937_0  | 40  | 0.6809 | 1          | 0.6809 | 0 | 0 | 0 | 0.9359 Ref |
| OL539451 | Unassigned | Unassigned | Unassigned | 455_0  | Clustered           | 18 VC_455_0  | 18  | 0.4598 | 1          | 0.4598 | 0 | 0 | 0 | 1 Ref      |
| OL539452 | Unassigned | Unassigned | Unassigned | 966_0  | Clustered           | 3 VC_966_0   | 3   | 0.3549 | 0.99840333 | 0.3543 | 0 | 0 | 0 | 1 Ref      |
| OL539453 | Unassigned | Unassigned | Unassigned | 455_0  | Clustered           | 18 VC_455_0  | 18  | 0.4598 | 1          | 0.4598 | 0 | 0 | 0 | 1 Ref      |
| OL539454 | Unassigned | Unassigned | Unassigned | 795_0  | Clustered           | 19 VC_795_0  | 19  | 0.6848 | 1          | 0.6848 | 0 | 0 | 0 | 1 Ref      |
| OL539455 | Unassigned | Unassigned | Unassigned | 1346_0 | Clustered           | 10 VC_1346_0 | 10  | 0.7784 | 1          | 0.7784 | 0 | 0 | 0 | 1 Ref      |
| OL539456 | Unassigned | Unassigned | Unassigned | 1346_0 | Clustered           | 10 VC_1346_0 | 10  | 0.7784 | 1          | 0.7784 | 0 | 0 | 0 | 1 Ref      |
| OL539458 | Unassigned | Unassigned | Unassigned | 491_0  | Clustered           | 36 VC_491_0  | 36  | 0.5336 | 1          | 0.5336 | 0 | 0 | 0 | 0.9714 Ref |
| OL539459 | Unassigned | Unassigned | Unassigned | 941_0  | Clustered           | 40 VC_941_0  | 40  | 0.6903 | 1          | 0.6903 | 0 | 0 | 0 | 1 Ref      |
| OL539460 | Unassigned | Unassigned | Unassigned | 938_0  | Clustered           | 99 VC_938_0  | 99  | 0.9119 | 1          | 0.9119 | 0 | 0 | 0 | 0.9928 Ref |
| OL539461 | Unassigned | Unassigned | Unassigned | 584_0  | Clustered           | 28 VC_584_0  | 28  | 0.7704 | 1          | 0.7704 | 0 | 0 | 0 | 1 Ref      |
| OL539462 | Unassigned | Unassigned | Unassigned | 584_0  | Clustered           | 28 VC_584_0  | 28  | 0.7704 | 1          | 0.7704 | 0 | 0 | 0 | 1 Ref      |
| OL539464 | Unassigned | Unassigned | Unassigned | 1346_0 | Clustered           | 10 VC_1346_0 | 10  | 0.7784 | 1          | 0.7784 | 0 | 0 | 0 | 1 Ref      |
| OL539465 | Unassigned | Unassigned | Unassigned | 584_0  | Clustered           | 28 VC_584_0  | 28  | 0.7704 | 1          | 0.7704 | 0 | 0 | 0 | 1 Ref      |
| OL539466 | Unassigned | Unassigned | Unassigned | 584_0  | Clustered           | 28 VC_584_0  | 28  | 0.7704 | 1          | 0.7704 | 0 | 0 | 0 | 1 Ref      |
| OL539467 | Unassigned | Unassigned | Unassigned | 455_0  | Clustered           | 18 VC_455_0  | 18  | 0.4598 | 1          | 0.4598 | 0 | 0 | 0 | 1 Ref      |
| OL539468 | Unassigned | Unassigned | Unassigned | 488_1  | Clustered           | 8 VC_488_1   | 8   | 0.2927 | 1          | 0.2927 | 0 | 0 | 0 | 1 Ref      |
| OL539470 | Unassigned | Unassigned | Unassigned | 669_0  | Clustered           | 21 VC_669_0  | 21  | 0.3623 | 1          | 0.3623 | 0 | 0 | 0 | 1 Ref      |
| OL539471 | Unassigned | Unassigned | Unassigned | 669_0  | Clustered           | 21 VC_669_0  | 21  | 0.3623 | 1          | 0.3623 | 0 | 0 | 0 | 1 Ref      |
| OL539472 | Unassigned | Unassigned | Unassigned | 937_0  | Clustered           | 40 VC_937_0  | 40  | 0.6809 | 1          | 0.6809 | 0 | 0 | 0 | 0.9359 Ref |
| OL539727 | Unassigned | Unassigned | Unassigned | 638_0  | Clustered           | 45 VC_638_0  | 45  | 0.7741 | 1          | 0.7741 | 0 | 0 | 0 | 1 Ref      |
| OL539729 | Unassigned | Unassigned | Unassigned | 451_0  | Clustered           | 80 VC_451_0  | 80  | 0.9991 | 1          | 0.9991 | 0 | 0 | 0 | 1 Ref      |
| OL547738 | Unassigned | Unassigned | Unassigned | 898_0  | Clustered           | 10 VC_898_0  | 10  | 0.7284 | 1          | 0.7284 | 0 | 0 | 0 | 1 Ref      |
| OL549188 | Unassigned | Unassigned | Unassigned | 1207_0 | Clustered           | 29 VC_1207_0 | 29  | 0.8225 | 1          | 0.8225 | 0 | 0 | 0 | 1 Ref      |
| OL549189 | Unassigned | Unassigned | Unassigned | 1207_0 | Clustered           | 29 VC_1207_0 | 29  | 0.8225 | 1          | 0.8225 | 0 | 0 | 0 | 1 Ref      |
| OL549190 | Unassigned | Unassigned | Unassigned | 325_18 | Clustered/Singleton | 1 VC_325_18  | 1   | 0      | 1          | 0      | 0 | 0 | 0 | 1 Ref      |
| OL549191 | Unassigned | Unassigned | Unassigned | 1207_0 | Clustered           | 29 VC_1207_0 | 29  | 0.8225 | 1          | 0.8225 | 0 | 0 | 0 | 1 Ref      |
| OL549192 | Unassigned | Unassigned | Unassigned | 1207_0 | Clustered           | 29 VC_1207_0 | 29  | 0.8225 | 1          | 0.8225 | 0 | 0 | 0 | 1 Ref      |
| OL551674 | Unassigned | Unassigned | Unassigned | 669_0  | Clustered           | 21 VC_669_0  | 21  | 0.3623 | 1          | 0.3623 | 0 | 0 | 0 | 1 Ref      |
| OL580764 | Unassigned | Unassigned | Unassigned | 89_1   | Clustered           | 2 VC_89_1    | 2   | 0.0447 | 0.9464689  | 0.0423 | 0 | 0 | 0 | 1 Ref      |
| OL581611 | Unassigned | Unassigned | Unassigned | 129_0  | Clustered           | 43 VC_129_0  | 43  | 0.886  | 1          | 0.886  | 0 | 0 | 0 | 1 Ref      |
| OL604152 | Unassigned | Unassigned | Unassigned | 1049_0 | Clustered           | 8 VC_1049_0  | 8   | 0.6413 | 1          | 0.6413 | 0 | 0 | 0 | 1 Ref      |



|          |            |            |            |         |                     |              |     |        |            |        |   |   |   |            |
|----------|------------|------------|------------|---------|---------------------|--------------|-----|--------|------------|--------|---|---|---|------------|
| OL60627  | Unassigned | Unassigned | Unassigned | 592_0   | Clustered           | 50 VC_592_0  | 50  | 0.7314 | 1          | 0.7314 | 0 | 0 | 0 | 1 Ref      |
| OL614104 | Unassigned | Unassigned | Unassigned | 127_1   | Clustered/Singleton | 1 VC_127_1   | 1   | 0      | 1          | 0      | 0 | 0 | 0 | 1 Ref      |
| OL615010 | Unassigned | Unassigned | Unassigned | 835_0   | Clustered           | 67 VC_835_0  | 67  | 0.9624 | 1          | 0.9624 | 0 | 0 | 0 | 1 Ref      |
| OL615011 | Unassigned | Unassigned | Unassigned | 131_2   | Clustered           | 7 VC_131_2   | 7   | 0.0685 | 1          | 0.0685 | 0 | 0 | 0 | 0.9048 Ref |
| OL615012 | Unassigned | Unassigned | Unassigned | 283_26  | Clustered/Singleton | 1 VC_283_26  | 1   | 0      | 1          | 0      | 0 | 0 | 0 | 1 Ref      |
| OL615013 | Unassigned | Unassigned | Unassigned | 131_2   | Clustered           | 7 VC_131_2   | 7   | 0.0685 | 1          | 0.0685 | 0 | 0 | 0 | 0.9048 Ref |
| OL617020 | Unassigned | Unassigned | Unassigned | 1402_0  | Clustered           | 14 VC_1402_0 | 14  | 0.1673 | 0.51390354 | 0.086  | 0 | 0 | 0 | 1 Ref      |
| OL617021 | Unassigned | Unassigned | Unassigned | 1403_0  | Clustered           | 28 VC_1403_0 | 28  | 0.753  | 1          | 0.753  | 0 | 0 | 0 | 1 Ref      |
| OL617022 | Unassigned | Unassigned | Unassigned | 1403_0  | Clustered           | 28 VC_1403_0 | 28  | 0.753  | 1          | 0.753  | 0 | 0 | 0 | 1 Ref      |
| OL617023 | Unassigned | Unassigned | Unassigned | 1233_0  | Clustered           | 16 VC_1233_0 | 16  | 0.8971 | 1          | 0.8971 | 0 | 0 | 0 | 1 Ref      |
| OL617024 | Unassigned | Unassigned | Unassigned | 1402_0  | Clustered           | 14 VC_1402_0 | 14  | 0.1673 | 0.51390354 | 0.086  | 0 | 0 | 0 | 1 Ref      |
| OL617025 | Unassigned | Unassigned | Unassigned | 1403_0  | Clustered           | 28 VC_1403_0 | 28  | 0.753  | 1          | 0.753  | 0 | 0 | 0 | 1 Ref      |
| OL617026 | Unassigned | Unassigned | Unassigned | 1402_0  | Clustered           | 14 VC_1402_0 | 14  | 0.1673 | 0.51390354 | 0.086  | 0 | 0 | 0 | 1 Ref      |
| OL617027 | Unassigned | Unassigned | Unassigned | 1403_0  | Clustered           | 28 VC_1403_0 | 28  | 0.753  | 1          | 0.753  | 0 | 0 | 0 | 1 Ref      |
| OL617028 | Unassigned | Unassigned | Unassigned | 1243_0  | Clustered           | 52 VC_1243_0 | 52  | 0.9126 | 0.92708311 | 0.8461 | 0 | 0 | 0 | 1 Ref      |
| OL617029 | Unassigned | Unassigned | Unassigned | 995_0   | Clustered           | 69 VC_995_0  | 69  | 0.8547 | 1          | 0.8547 | 0 | 0 | 0 | 1 Ref      |
| OL617030 | Unassigned | Unassigned | Unassigned | 1077_0  | Clustered           | 48 VC_1077_0 | 48  | 0.8525 | 1          | 0.8525 | 0 | 0 | 0 | 1 Ref      |
| OL617031 | Unassigned | Unassigned | Unassigned | 1077_0  | Clustered           | 48 VC_1077_0 | 48  | 0.8525 | 1          | 0.8525 | 0 | 0 | 0 | 1 Ref      |
| OL617032 | Unassigned | Unassigned | Unassigned | 1062_0  | Clustered           | 45 VC_1062_0 | 45  | 0.9734 | 0.50949847 | 0.4959 | 0 | 0 | 0 | 1 Ref      |
| OL617033 | Unassigned | Unassigned | Unassigned | 1062_0  | Clustered           | 45 VC_1062_0 | 45  | 0.9734 | 0.50949847 | 0.4959 | 0 | 0 | 0 | 1 Ref      |
| OL617035 | Unassigned | Unassigned | Unassigned | 198_0   | Clustered           | 28 VC_198_0  | 28  | 0.2429 | 0.99971175 | 0.2429 | 0 | 0 | 0 | 1 Ref      |
| OL617036 | Unassigned | Unassigned | Unassigned | 1285_0  | Clustered           | 25 VC_1285_0 | 25  | 1      | 1          | 1      | 0 | 0 | 0 | 1 Ref      |
| OL617037 | Unassigned | Unassigned | Unassigned | 1222_0  | Clustered           | 3 VC_1222_0  | 3   | 1      | 0          | 0      | 0 | 0 | 0 | 1 Ref      |
| OL617041 | Unassigned | Unassigned | Unassigned | 460_0   | Clustered           | 19 VC_460_0  | 19  | 0.3744 | 1          | 0.3744 | 0 | 0 | 0 | 1 Ref      |
| OL617042 | Unassigned | Unassigned | Unassigned | 35_1    | Clustered/Singleton | 1 VC_35_1    | 1   | 0      | 1          | 0      | 0 | 0 | 0 | 1 Ref      |
| OL622073 | Unassigned | Unassigned | Unassigned | 1028_0  | Clustered           | 8 VC_1028_0  | 8   | 0.9323 | 1          | 0.9323 | 0 | 0 | 0 | 1 Ref      |
| OL634959 | Unassigned | Unassigned | Unassigned | 154_0   | Clustered           | 4 VC_154_0   | 4   | 0.1766 | 0.99995106 | 0.1766 | 0 | 0 | 0 | 1 Ref      |
| OL652658 | Unassigned | Unassigned | Unassigned | 637_0   | Clustered           | 115 VC_637_0 | 115 | 0.731  | 1          | 0.731  | 0 | 0 | 0 | 0.8764 Ref |
| OL656105 | Unassigned | Unassigned | Unassigned | 1201_0  | Clustered           | 2 VC_1201_0  | 2   | 0.8919 | 0.81445332 | 0.7264 | 0 | 0 | 0 | 1 Ref      |
| OL656110 | Unassigned | Unassigned | Unassigned | 131_1   | Clustered           | 6 VC_131_1   | 6   | 0.057  | 0.99999999 | 0.057  | 0 | 0 | 0 | 1 Ref      |
| OL657226 | Unassigned | Unassigned | Unassigned | 43_0    | Clustered           | 38 VC_43_0   | 38  | 0.5885 | 1          | 0.5885 | 0 | 0 | 0 | 0.9659 Ref |
| OL657227 | Unassigned | Unassigned | Unassigned | 43_0    | Clustered           | 38 VC_43_0   | 38  | 0.5885 | 1          | 0.5885 | 0 | 0 | 0 | 0.9659 Ref |
| OL657228 | Unassigned | Unassigned | Unassigned | 43_0    | Clustered           | 38 VC_43_0   | 38  | 0.5885 | 1          | 0.5885 | 0 | 0 | 0 | 0.9659 Ref |
| OL658619 | Unassigned | Unassigned | Unassigned | 498_0   | Clustered           | 8 VC_498_0   | 8   | 0.3987 | 1          | 0.3987 | 0 | 0 | 0 | 1 Ref      |
| OL674249 | Unassigned | Unassigned | Unassigned | 938_0   | Clustered           | 99 VC_938_0  | 99  | 0.9119 | 1          | 0.9119 | 0 | 0 | 0 | 0.9928 Ref |
| OL674541 | Unassigned | Unassigned | Unassigned | 169_0   | Clustered           | 20 VC_169_0  | 20  | 0.7529 | 1          | 0.7529 | 0 | 0 | 0 | 1 Ref      |
| OL676770 | Unassigned | Unassigned | Unassigned | 758_0   | Clustered           | 18 VC_758_0  | 18  | 0.738  | 1          | 0.738  | 0 | 0 | 0 | 1 Ref      |
| OL689226 | Unassigned | Unassigned | Unassigned | 1467_0  | Clustered           | 3 VC_1467_0  | 3   | 1      | 1          | 1      | 0 | 0 | 0 | 1 Ref      |
| OL689227 | Unassigned | Unassigned | Unassigned | 1467_0  | Clustered           | 3 VC_1467_0  | 3   | 1      | 1          | 1      | 0 | 0 | 0 | 1 Ref      |
| OL689230 | Unassigned | Unassigned | Unassigned | 1467_0  | Clustered           | 3 VC_1467_0  | 3   | 1      | 1          | 1      | 0 | 0 | 0 | 1 Ref      |
| OL690335 | Unassigned | Unassigned | Unassigned | 8_0     | Clustered           | 58 VC_8_0    | 58  | 0.8306 | 1          | 0.8306 | 0 | 0 | 0 | 0.9946 Ref |
| OL691920 | Unassigned | Unassigned | Unassigned | 385_0   | Clustered           | 51 VC_385_0  | 51  | 0.8754 | 1          | 0.8754 | 0 | 0 | 0 | 1 Ref      |
| OL699877 | Unassigned | Unassigned | Unassigned | 592_0   | Clustered           | 50 VC_592_0  | 50  | 0.7314 | 1          | 0.7314 | 0 | 0 | 0 | 1 Ref      |
| OL702938 | Unassigned | Unassigned | Unassigned | 938_0   | Clustered           | 99 VC_938_0  | 99  | 0.9119 | 1          | 0.9119 | 0 | 0 | 0 | 0.9928 Ref |
| OL702939 | Unassigned | Unassigned | Unassigned | 506_0   | Clustered           | 8 VC_506_0   | 8   | 0.7376 | 1          | 0.7376 | 0 | 0 | 0 | 1 Ref      |
| OL739525 | Unassigned | Unassigned | Unassigned | 847_1   | Clustered           | 26 VC_847_1  | 26  | 0.6323 | 1          | 0.6323 | 0 | 0 | 0 | 0.9815 Ref |
| OL741057 | Unassigned | Unassigned | Unassigned | 149_4   | Clustered/Singleton | 1 VC_149_4   | 1   | 0      | 1          | 0      | 0 | 0 | 0 | 1 Ref      |
| OL741059 | Unassigned | Unassigned | Unassigned | 792_0   | Clustered           | 35 VC_792_0  | 35  | 0.9828 | 1          | 0.9828 | 0 | 0 | 0 | 1 Ref      |
| OL741431 | Unassigned | Unassigned | Unassigned | 591_0   | Clustered           | 14 VC_591_0  | 14  | 0.5184 | 1          | 0.5184 | 0 | 0 | 0 | 1 Ref      |
| OL741432 | Unassigned | Unassigned | Unassigned | 283_118 | Clustered           | 3 VC_283_118 | 3   | 0.0054 | 0.99110781 | 0.0053 | 0 | 0 | 0 | 1 Ref      |
| OL742559 | Unassigned | Unassigned | Unassigned | 551_6   | Clustered           | 22 VC_551_6  | 22  | 0.1214 | 1          | 0.1214 | 0 | 0 | 0 | 0.8095 Ref |
| OL742560 | Unassigned | Unassigned | Unassigned | 1075_0  | Clustered           | 4 VC_1075_0  | 4   | 0.1483 | 0.99998427 | 0.1483 | 0 | 0 | 0 | 1 Ref      |
| OL742561 | Unassigned | Unassigned | Unassigned | 521_0   | Clustered           | 37 VC_521_0  | 37  | 0.912  | 1          | 0.912  | 0 | 0 | 0 | 1 Ref      |
| OL742562 | Unassigned | Unassigned | Unassigned | 1234_0  | Clustered           | 44 VC_1234_0 | 44  | 1      | 1          | 1      | 0 | 0 | 0 | 1 Ref      |
| OL742563 | Unassigned | Unassigned | Unassigned | 982_0   | Clustered           | 62 VC_982_0  | 62  | 0.8646 | 1          | 0.8646 | 0 | 0 | 0 | 0.743 Ref  |
| OL743187 | Unassigned | Unassigned | Unassigned | 698_0   | Clustered           | 26 VC_698_0  | 26  | 0.9366 | 1          | 0.9366 | 0 | 0 | 0 | 1 Ref      |
| OL744111 | Unassigned | Unassigned | Unassigned | 817_0   | Clustered           | 14 VC_817_0  | 14  | 0.6342 | 1          | 0.6342 | 0 | 0 | 0 | 1 Ref      |
| OL744112 | Unassigned | Unassigned | Unassigned | 818_0   | Clustered           | 20 VC_818_0  | 20  | 0.9601 | 1          | 0.9601 | 0 | 0 | 0 | 1 Ref      |
| OL744209 | Unassigned | Unassigned | Unassigned | 385_0   | Clustered           | 51 VC_385_0  | 51  | 0.8754 | 1          | 0.8754 | 0 | 0 | 0 | 1 Ref      |
| OL744210 | Unassigned | Unassigned | Unassigned | 938_0   | Clustered           | 99 VC_938_0  | 99  | 0.9119 | 1          | 0.9119 | 0 | 0 | 0 | 0.9928 Ref |
| OL744211 | Unassigned | Unassigned | Unassigned | 849_6   | Clustered           | 7 VC_849_6   | 7   | 0.164  | 0.99999999 | 0.164  | 0 | 0 | 0 | 0.9524 Ref |
| OL744212 | Unassigned | Unassigned | Unassigned | 385_0   | Clustered           | 51 VC_385_0  | 51  | 0.8754 | 1          | 0.8754 | 0 | 0 | 0 | 1 Ref      |
| OL744213 | Unassigned | Unassigned | Unassigned | 938_0   | Clustered           | 99 VC_938_0  | 99  | 0.9119 | 1          | 0.9119 | 0 | 0 | 0 | 0.9928 Ref |
| OL744214 | Unassigned | Unassigned | Unassigned | 849_6   | Clustered           | 7 VC_849_6   | 7   | 0.164  | 0.99999999 | 0.164  | 0 | 0 | 0 | 0.9524 Ref |
| OL744215 | Unassigned | Unassigned | Unassigned | 452_0   | Clustered           | 66 VC_452_0  | 66  | 0.9248 | 1          | 0.9248 | 0 | 0 | 0 | 1 Ref      |
| OL744216 | Unassigned | Unassigned | Unassigned | 849_6   | Clustered           | 7 VC_849_6   | 7   | 0.164  | 0.99999999 | 0.164  | 0 | 0 | 0 | 0.9524 Ref |
| OL744217 | Unassigned | Unassigned | Unassigned | 385_0   | Clustered           | 51 VC_385_0  | 51  | 0.8754 | 1          | 0.8754 | 0 | 0 | 0 | 1 Ref      |
| OL744218 | Unassigned | Unassigned | Unassigned | 452_0   | Clustered           | 66 VC_452_0  | 66  | 0.9248 | 1          | 0.9248 | 0 | 0 | 0 | 1 Ref      |
| OL744219 | Unassigned | Unassigned | Unassigned | 849_6   | Clustered           | 7 VC_849_6   | 7   | 0.164  | 0.99999999 | 0.164  | 0 | 0 | 0 | 0.9524 Ref |
| OL744220 | Unassigned | Unassigned | Unassigned | 849_6   | Clustered           | 7 VC_849_6   | 7   | 0.164  | 0.99999999 | 0.164  | 0 | 0 | 0 | 0.9524 Ref |
| OL754588 | Unassigned | Unassigned | Unassigned | 79_0    | Clustered           | 64 VC_79_0   | 64  | 0.4185 | 1          | 0.4185 | 0 | 0 | 0 | 0.7649 Ref |
| OL754589 | Unassigned | Unassigned | Unassigned | 423_0   | Clustered           | 45 VC_423_0  | 45  | 0.9484 | 1          | 0.9484 | 0 | 0 | 0 | 1 Ref      |
| OL762410 | Unassigned | Unassigned | Unassigned | 807_0   | Clustered           | 17 VC_807_0  | 17  | 0.907  | 1          | 0.907  | 0 | 0 | 0 | 1 Ref      |
| OL763419 | Unassigned | Unassigned | Unassigned | 166_0   | Clustered           | 26 VC_166_0  | 26  | 0.7923 | 1          | 0.7923 | 0 | 0 | 0 | 1 Ref      |
| OL763420 | Unassigned | Unassigned | Unassigned | 492_1   | Clustered           | 20 VC_492_1  | 20  | 0.4176 | 1          | 0.4176 | 0 | 0 | 0 | 1 Ref      |
| OL770073 | Unassigned | Unassigned | Unassigned | 283_177 | Clustered/Singleton | 1 VC_283_177 | 1   | 0      | 1          | 0      | 0 | 0 | 0 | 1 Ref      |
| OL770074 | Unassigned | Unassigned | Unassigned | 286_12  | Clustered           | 3 VC_286_12  | 3   | 0.0146 | 0.92328265 | 0.0135 | 0 | 0 | 0 | 1 Ref      |
| OL770107 | Unassigned | Unassigned | Unassigned | 290_6   | Clustered           | 12 VC_290_6  | 12  | 0.1149 | 1          | 0.1149 | 0 | 0 | 0 | 0.8182 Ref |
| OL770108 | Unassigned | Unassigned | Unassigned | 575_0   | Clustered           | 35 VC_575_0  | 35  | 0.8815 | 1          | 0.8815 | 0 | 0 | 0 | 1 Ref      |
| OL770258 | Unassigned | Unassigned | Unassigned | 492_1   | Clustered           | 20 VC_492_1  | 20  | 0.4176 | 1          | 0.4176 | 0 | 0 | 0 | 1 Ref      |
| OL770259 | Unassigned | Unassigned | Unassigned | 492_1   | Clustered           | 20 VC_492_1  | 20  | 0.4176 | 1          | 0.4176 | 0 | 0 | 0 | 1 Ref      |



|          |            |            |            |         |                     |              |     |        |            |        |   |   |   |            |
|----------|------------|------------|------------|---------|---------------------|--------------|-----|--------|------------|--------|---|---|---|------------|
| OL770260 | Unassigned | Unassigned | Unassigned | 492_2   | Clustered           | 8 VC_492_2   | 8   | 0.1221 | 0.98786574 | 0.1206 | 0 | 0 | 0 | 1 Ref      |
| OL770261 | Unassigned | Unassigned | Unassigned | 492_1   | Clustered           | 20 VC_492_1  | 20  | 0.4176 | 1          | 0.4176 | 0 | 0 | 0 | 1 Ref      |
| OL770262 | Unassigned | Unassigned | Unassigned | 492_1   | Clustered           | 20 VC_492_1  | 20  | 0.4176 | 1          | 0.4176 | 0 | 0 | 0 | 1 Ref      |
| OL770263 | Unassigned | Unassigned | Unassigned | 699_0   | Clustered           | 71 VC_699_0  | 71  | 0.9352 | 1          | 0.9352 | 0 | 0 | 0 | 1 Ref      |
| OL770276 | Unassigned | Unassigned | Unassigned | 637_0   | Clustered           | 115 VC_637_0 | 115 | 0.731  | 1          | 0.731  | 0 | 0 | 0 | 0.8764 Ref |
| OL770278 | Unassigned | Unassigned | Unassigned | 835_0   | Clustered           | 67 VC_835_0  | 67  | 0.9624 | 1          | 0.9624 | 0 | 0 | 0 | 1 Ref      |
| OL770310 | Unassigned | Unassigned | Unassigned | 191_17  | Clustered           | 4 VC_191_17  | 4   | 0.0166 | 0.99930063 | 0.0166 | 0 | 0 | 0 | 0.8333 Ref |
| OL770365 | Unassigned | Unassigned | Unassigned | 793_0   | Clustered           | 12 VC_793_0  | 12  | 0.8531 | 1          | 0.8531 | 0 | 0 | 0 | 1 Ref      |
| OL773676 | Unassigned | Unassigned | Unassigned | 451_0   | Clustered           | 80 VC_451_0  | 80  | 0.9991 | 1          | 0.9991 | 0 | 0 | 0 | 1 Ref      |
| OL773677 | Unassigned | Unassigned | Unassigned | 451_0   | Clustered           | 80 VC_451_0  | 80  | 0.9991 | 1          | 0.9991 | 0 | 0 | 0 | 1 Ref      |
| OL774866 | Unassigned | Unassigned | Unassigned | 1187_0  | Clustered           | 3 VC_1187_0  | 3   | 0.924  | 0.92554266 | 0.8552 | 0 | 0 | 0 | 1 Ref      |
| OL774867 | Unassigned | Unassigned | Unassigned | 137_0   | Clustered           | 3 VC_137_0   | 3   | 0.1129 | 0.998547   | 0.1128 | 0 | 0 | 0 | 1 Ref      |
| OL774868 | Unassigned | Unassigned | Unassigned | 333_0   | Clustered           | 25 VC_333_0  | 25  | 0.4681 | 1          | 0.4681 | 0 | 0 | 0 | 1 Ref      |
| OL774869 | Unassigned | Unassigned | Unassigned | 317_2   | Clustered           | 20 VC_317_2  | 20  | 0.1976 | 1          | 0.1976 | 0 | 0 | 0 | 0.6842 Ref |
| OL774870 | Unassigned | Unassigned | Unassigned | 293_3   | Clustered           | 19 VC_293_3  | 19  | 0.2627 | 1          | 0.2627 | 0 | 0 | 0 | 0.8187 Ref |
| OL774872 | Unassigned | Unassigned | Unassigned | 323_1   | Clustered           | 9 VC_323_1   | 9   | 0.1798 | 1          | 0.1798 | 0 | 0 | 0 | 0.75 Ref   |
| OL774873 | Unassigned | Unassigned | Unassigned | 412_0   | Clustered           | 39 VC_412_0  | 39  | 0.845  | 1          | 0.845  | 0 | 0 | 0 | 1 Ref      |
| OL774876 | Unassigned | Unassigned | Unassigned | 1187_0  | Clustered           | 3 VC_1187_0  | 3   | 0.924  | 0.92554266 | 0.8552 | 0 | 0 | 0 | 1 Ref      |
| OL774877 | Unassigned | Unassigned | Unassigned | 317_2   | Clustered           | 20 VC_317_2  | 20  | 0.1976 | 1          | 0.1976 | 0 | 0 | 0 | 0.6842 Ref |
| OL780484 | Unassigned | Unassigned | Unassigned | 290_5   | Clustered           | 14 VC_290_5  | 14  | 0.1422 | 1          | 0.1422 | 0 | 0 | 0 | 0.9231 Ref |
| OL791266 | Unassigned | Unassigned | Unassigned | 242_1   | Clustered           | 20 VC_242_1  | 20  | 0.684  | 1          | 0.684  | 0 | 0 | 0 | 0.8368 Ref |
| OL799256 | Unassigned | Unassigned | Unassigned | 695_0   | Clustered           | 48 VC_695_0  | 48  | 0.8162 | 1          | 0.8162 | 0 | 0 | 0 | 1 Ref      |
| OL799257 | Unassigned | Unassigned | Unassigned | 695_0   | Clustered           | 48 VC_695_0  | 48  | 0.8162 | 1          | 0.8162 | 0 | 0 | 0 | 1 Ref      |
| OL799258 | Unassigned | Unassigned | Unassigned | 92_0    | Clustered           | 22 VC_92_0   | 22  | 0.5639 | 1          | 0.5639 | 0 | 0 | 0 | 1 Ref      |
| OL799259 | Unassigned | Unassigned | Unassigned | 968_0   | Clustered           | 4 VC_968_0   | 4   | 0.2959 | 0.99997642 | 0.2959 | 0 | 0 | 0 | 1 Ref      |
| OL799260 | Unassigned | Unassigned | Unassigned | 92_0    | Clustered           | 22 VC_92_0   | 22  | 0.5639 | 1          | 0.5639 | 0 | 0 | 0 | 1 Ref      |
| OL799327 | Unassigned | Unassigned | Unassigned | 812_3   | Clustered/Singleton | 1 VC_812_3   | 1   | 0      | 1          | 0      | 0 | 0 | 0 | 1 Ref      |
| OL799328 | Unassigned | Unassigned | Unassigned | 823_0   | Clustered           | 124 VC_823_0 | 124 | 0.9492 | 1          | 0.9492 | 0 | 0 | 0 | 1 Ref      |
| OL800603 | Unassigned | Unassigned | Unassigned | 386_0   | Clustered           | 49 VC_386_0  | 49  | 0.7941 | 1          | 0.7941 | 0 | 0 | 0 | 1 Ref      |
| OL800605 | Unassigned | Unassigned | Unassigned | 385_0   | Clustered           | 51 VC_385_0  | 51  | 0.8754 | 1          | 0.8754 | 0 | 0 | 0 | 1 Ref      |
| OL800606 | Unassigned | Unassigned | Unassigned | 329_11  | Clustered           | 15 VC_329_11 | 15  | 0.0791 | 1          | 0.0791 | 0 | 0 | 0 | 0.9333 Ref |
| OL800706 | Unassigned | Unassigned | Unassigned | 575_0   | Clustered           | 35 VC_575_0  | 35  | 0.8815 | 1          | 0.8815 | 0 | 0 | 0 | 1 Ref      |
| OL802210 | Unassigned | Unassigned | Unassigned | 423_0   | Clustered           | 45 VC_423_0  | 45  | 0.9484 | 1          | 0.9484 | 0 | 0 | 0 | 1 Ref      |
| OL802211 | Unassigned | Unassigned | Unassigned | 749_0   | Clustered           | 40 VC_749_0  | 40  | 0.7517 | 1          | 0.7517 | 0 | 0 | 0 | 1 Ref      |
| OL825705 | Unassigned | Unassigned | Unassigned | 329_11  | Clustered           | 15 VC_329_11 | 15  | 0.0791 | 1          | 0.0791 | 0 | 0 | 0 | 0.9333 Ref |
| OL829977 | Unassigned | Unassigned | Unassigned | 919_0   | Clustered           | 39 VC_919_0  | 39  | 0.9069 | 1          | 0.9069 | 0 | 0 | 0 | 1 Ref      |
| OL829978 | Unassigned | Unassigned | Unassigned | 1071_1  | Clustered/Singleton | 1 VC_1071_1  | 1   | 0      | 1          | 0      | 0 | 0 | 0 | 1 Ref      |
| OL840290 | Unassigned | Unassigned | Unassigned | 8_0     | Clustered           | 58 VC_8_0    | 58  | 0.8306 | 1          | 0.8306 | 0 | 0 | 0 | 0.9946 Ref |
| OL840900 | Unassigned | Unassigned | Unassigned | 600_2   | Clustered           | 10 VC_600_2  | 10  | 0.3041 | 1          | 0.3041 | 0 | 0 | 0 | 1 Ref      |
| OL840901 | Unassigned | Unassigned | Unassigned | 597_0   | Clustered           | 6 VC_597_0   | 6   | 0.1801 | 1          | 0.1801 | 0 | 0 | 0 | 1 Ref      |
| OL856099 | Unassigned | Unassigned | Unassigned | 618_0   | Clustered           | 13 VC_618_0  | 13  | 0.6252 | 1          | 0.6252 | 0 | 0 | 0 | 1 Ref      |
| OL856139 | Unassigned | Unassigned | Unassigned | 386_0   | Clustered           | 49 VC_386_0  | 49  | 0.7941 | 1          | 0.7941 | 0 | 0 | 0 | 1 Ref      |
| OL865411 | Unassigned | Unassigned | Unassigned | 937_0   | Clustered           | 40 VC_937_0  | 40  | 0.6809 | 1          | 0.6809 | 0 | 0 | 0 | 0.9359 Ref |
| OL870316 | Unassigned | Unassigned | Unassigned | 283_118 | Clustered           | 3 VC_283_118 | 3   | 0.0054 | 0.99110781 | 0.0053 | 0 | 0 | 0 | 1 Ref      |
| OL870317 | Unassigned | Unassigned | Unassigned | 283_112 | Clustered/Singleton | 1 VC_283_112 | 1   | 0      | 1          | 0      | 0 | 0 | 0 | 1 Ref      |
| OL870318 | Unassigned | Unassigned | Unassigned | 491_0   | Clustered           | 36 VC_491_0  | 36  | 0.5336 | 1          | 0.5336 | 0 | 0 | 0 | 0.9714 Ref |
| OL870319 | Unassigned | Unassigned | Unassigned | 491_0   | Clustered           | 36 VC_491_0  | 36  | 0.5336 | 1          | 0.5336 | 0 | 0 | 0 | 0.9714 Ref |
| OL870611 | Unassigned | Unassigned | Unassigned | 92_0    | Clustered           | 22 VC_92_0   | 22  | 0.5639 | 1          | 0.5639 | 0 | 0 | 0 | 1 Ref      |
| OL870612 | Unassigned | Unassigned | Unassigned | 108_0   | Clustered           | 33 VC_108_0  | 33  | 0.949  | 1          | 0.949  | 0 | 0 | 0 | 1 Ref      |
| OL955261 | Unassigned | Unassigned | Unassigned | 978_0   | Clustered           | 2 VC_978_0   | 2   | 0.0595 | 0.95411371 | 0.0568 | 0 | 0 | 0 | 1 Ref      |
| OL956808 | Unassigned | Unassigned | Unassigned | 283_65  | Clustered/Singleton | 1 VC_283_65  | 1   | 0      | 1          | 0      | 0 | 0 | 0 | 1 Ref      |
| OL959999 | Unassigned | Unassigned | Unassigned | 117_0   | Clustered           | 9 VC_117_0   | 9   | 0.9977 | 0.98988637 | 0.9876 | 0 | 0 | 0 | 1 Ref      |
| OL960029 | Unassigned | Unassigned | Unassigned | 469_0   | Clustered           | 2 VC_469_0   | 2   | 0.1492 | 0.95658144 | 0.1427 | 0 | 0 | 0 | 1 Ref      |
| OL960030 | Unassigned | Unassigned | Unassigned | 700_0   | Clustered           | 10 VC_700_0  | 10  | 0.8076 | 1          | 0.8076 | 0 | 0 | 0 | 1 Ref      |
| OL960567 | Unassigned | Unassigned | Unassigned | 149_8   | Clustered           | 66 VC_149_8  | 66  | 0.4565 | 1          | 0.4565 | 0 | 0 | 0 | 0.8182 Ref |
| OL960568 | Unassigned | Unassigned | Unassigned | 149_8   | Clustered           | 66 VC_149_8  | 66  | 0.4565 | 1          | 0.4565 | 0 | 0 | 0 | 0.8182 Ref |
| OL960569 | Unassigned | Unassigned | Unassigned | 149_8   | Clustered           | 66 VC_149_8  | 66  | 0.4565 | 1          | 0.4565 | 0 | 0 | 0 | 0.8182 Ref |
| OL960570 | Unassigned | Unassigned | Unassigned | 149_8   | Clustered           | 66 VC_149_8  | 66  | 0.4565 | 1          | 0.4565 | 0 | 0 | 0 | 0.8182 Ref |
| OL960573 | Unassigned | Unassigned | Unassigned | 795_0   | Clustered           | 19 VC_795_0  | 19  | 0.6848 | 1          | 0.6848 | 0 | 0 | 0 | 1 Ref      |
| OL960574 | Unassigned | Unassigned | Unassigned | 792_0   | Clustered           | 35 VC_792_0  | 35  | 0.9828 | 1          | 0.9828 | 0 | 0 | 0 | 1 Ref      |
| OL960575 | Unassigned | Unassigned | Unassigned | 795_0   | Clustered           | 19 VC_795_0  | 19  | 0.6848 | 1          | 0.6848 | 0 | 0 | 0 | 1 Ref      |
| OL960576 | Unassigned | Unassigned | Unassigned | 286_1   | Clustered           | 21 VC_286_1  | 21  | 0.1696 | 1          | 0.1696 | 0 | 0 | 0 | 0.9048 Ref |
| OL960577 | Unassigned | Unassigned | Unassigned | 286_1   | Clustered           | 21 VC_286_1  | 21  | 0.1696 | 1          | 0.1696 | 0 | 0 | 0 | 0.9048 Ref |
| OL960578 | Unassigned | Unassigned | Unassigned | 575_0   | Clustered           | 35 VC_575_0  | 35  | 0.8815 | 1          | 0.8815 | 0 | 0 | 0 | 1 Ref      |
| OL960579 | Unassigned | Unassigned | Unassigned | 575_0   | Clustered           | 35 VC_575_0  | 35  | 0.8815 | 1          | 0.8815 | 0 | 0 | 0 | 1 Ref      |
| OL960580 | Unassigned | Unassigned | Unassigned | 283_152 | Clustered/Singleton | 1 VC_283_152 | 1   | 0      | 1          | 0      | 0 | 0 | 0 | 1 Ref      |
| OL960581 | Unassigned | Unassigned | Unassigned | 283_157 | Clustered/Singleton | 1 VC_283_157 | 1   | 0      | 1          | 0      | 0 | 0 | 0 | 1 Ref      |
| OL960582 | Unassigned | Unassigned | Unassigned | 575_0   | Clustered           | 35 VC_575_0  | 35  | 0.8815 | 1          | 0.8815 | 0 | 0 | 0 | 1 Ref      |
| OL963731 | Unassigned | Unassigned | Unassigned | 978_1   | Clustered/Singleton | 1 VC_978_1   | 1   | 0      | 1          | 0      | 0 | 0 | 0 | 1 Ref      |
| OL964058 | Unassigned | Unassigned | Unassigned | 187_3   | Clustered           | 9 VC_187_3   | 9   | 0.1971 | 1          | 0.1971 | 0 | 0 | 0 | 0.8611 Ref |
| OL964734 | Unassigned | Unassigned | Unassigned | 461_0   | Clustered           | 96 VC_461_0  | 96  | 0.9307 | 1          | 0.9307 | 0 | 0 | 0 | 0.9575 Ref |
| OL964735 | Unassigned | Unassigned | Unassigned | 283_91  | Clustered           | 11 VC_283_91 | 11  | 0.0285 | 1          | 0.0285 | 0 | 0 | 0 | 1 Ref      |
| OL964736 | Unassigned | Unassigned | Unassigned | 133_10  | Clustered           | 10 VC_133_10 | 10  | 0.0527 | 1          | 0.0527 | 0 | 0 | 0 | 1 Ref      |
| OL964737 | Unassigned | Unassigned | Unassigned | 133_10  | Clustered           | 10 VC_133_10 | 10  | 0.0527 | 1          | 0.0527 | 0 | 0 | 0 | 1 Ref      |
| OL964738 | Unassigned | Unassigned | Unassigned | 133_10  | Clustered           | 10 VC_133_10 | 10  | 0.0527 | 1          | 0.0527 | 0 | 0 | 0 | 1 Ref      |
| OL964739 | Unassigned | Unassigned | Unassigned | 392_0   | Clustered           | 126 VC_392_0 | 126 | 0.9621 | 1          | 0.9621 | 0 | 0 | 0 | 1 Ref      |
| OL964740 | Unassigned | Unassigned | Unassigned | 392_0   | Clustered           | 126 VC_392_0 | 126 | 0.9621 | 1          | 0.9621 | 0 | 0 | 0 | 1 Ref      |
| OL964741 | Unassigned | Unassigned | Unassigned | 392_0   | Clustered           | 126 VC_392_0 | 126 | 0.9621 | 1          | 0.9621 | 0 | 0 | 0 | 1 Ref      |
| OL964742 | Unassigned | Unassigned | Unassigned | 461_0   | Clustered           | 96 VC_461_0  | 96  | 0.9307 | 1          | 0.9307 | 0 | 0 | 0 | 0.9575 Ref |
| OL964743 | Unassigned | Unassigned | Unassigned | 461_0   | Clustered           | 96 VC_461_0  | 96  | 0.9307 | 1          | 0.9307 | 0 | 0 | 0 | 0.9575 Ref |
| OL964744 | Unassigned | Unassigned | Unassigned | 461_0   | Clustered           | 96 VC_461_0  | 96  | 0.9307 | 1          | 0.9307 | 0 | 0 | 0 | 0.9575 Ref |



|          |            |            |            |         |                     |              |     |        |            |        |   |   |   |            |
|----------|------------|------------|------------|---------|---------------------|--------------|-----|--------|------------|--------|---|---|---|------------|
| OL964745 | Unassigned | Unassigned | Unassigned | 283_91  | Clustered           | 11 VC_283_91 | 11  | 0.0285 | 1          | 0.0285 | 0 | 0 | 0 | 1 Ref      |
| OL964746 | Unassigned | Unassigned | Unassigned | 133_10  | Clustered           | 10 VC_133_10 | 10  | 0.0527 | 1          | 0.0527 | 0 | 0 | 0 | 1 Ref      |
| OL964747 | Unassigned | Unassigned | Unassigned | 133_10  | Clustered           | 10 VC_133_10 | 10  | 0.0527 | 1          | 0.0527 | 0 | 0 | 0 | 1 Ref      |
| OL964748 | Unassigned | Unassigned | Unassigned | 392_0   | Clustered           | 126 VC_392_0 | 126 | 0.9621 | 1          | 0.9621 | 0 | 0 | 0 | 1 Ref      |
| OL964749 | Unassigned | Unassigned | Unassigned | 392_0   | Clustered           | 126 VC_392_0 | 126 | 0.9621 | 1          | 0.9621 | 0 | 0 | 0 | 1 Ref      |
| OL964750 | Unassigned | Unassigned | Unassigned | 392_0   | Clustered           | 126 VC_392_0 | 126 | 0.9621 | 1          | 0.9621 | 0 | 0 | 0 | 1 Ref      |
| OL964751 | Unassigned | Unassigned | Unassigned | 461_0   | Clustered           | 96 VC_461_0  | 96  | 0.9307 | 1          | 0.9307 | 0 | 0 | 0 | 0.9575 Ref |
| OL964752 | Unassigned | Unassigned | Unassigned | 461_0   | Clustered           | 96 VC_461_0  | 96  | 0.9307 | 1          | 0.9307 | 0 | 0 | 0 | 0.9575 Ref |
| OL964753 | Unassigned | Unassigned | Unassigned | 133_10  | Clustered           | 10 VC_133_10 | 10  | 0.0527 | 1          | 0.0527 | 0 | 0 | 0 | 1 Ref      |
| OL964754 | Unassigned | Unassigned | Unassigned | 597_0   | Clustered           | 6 VC_597_0   | 6   | 0.1801 | 1          | 0.1801 | 0 | 0 | 0 | 1 Ref      |
| OL964755 | Unassigned | Unassigned | Unassigned | 230_0   | Clustered           | 3 VC_230_0   | 3   | 0.0739 | 0.9934951  | 0.0734 | 0 | 0 | 0 | 0.6667 Ref |
| OL964756 | Unassigned | Unassigned | Unassigned | 442_3   | Clustered           | 3 VC_442_3   | 3   | 0.0529 | 0.99675181 | 0.0527 | 0 | 0 | 0 | 1 Ref      |
| OL964948 | Unassigned | Unassigned | Unassigned | 699_0   | Clustered           | 71 VC_699_0  | 71  | 0.9352 | 1          | 0.9352 | 0 | 0 | 0 | 1 Ref      |
| OL976437 | Unassigned | Unassigned | Unassigned | 111_0   | Clustered           | 91 VC_111_0  | 91  | 0.9587 | 1          | 0.9587 | 0 | 0 | 0 | 1 Ref      |
| OL979478 | Unassigned | Unassigned | Unassigned | 111_0   | Clustered           | 91 VC_111_0  | 91  | 0.9587 | 1          | 0.9587 | 0 | 0 | 0 | 1 Ref      |
| OL979479 | Unassigned | Unassigned | Unassigned | 111_0   | Clustered           | 91 VC_111_0  | 91  | 0.9587 | 1          | 0.9587 | 0 | 0 | 0 | 1 Ref      |
| OL989991 | Unassigned | Unassigned | Unassigned | 490_1   | Clustered           | 5 VC_490_1   | 5   | 0.0447 | 0.99999996 | 0.0447 | 0 | 0 | 0 | 1 Ref      |
| OM022251 | Unassigned | Unassigned | Unassigned | 30_1    | Clustered           | 16 VC_30_1   | 16  | 0.1973 | 1          | 0.1973 | 0 | 0 | 0 | 0.8333 Ref |
| OM025231 | Unassigned | Unassigned | Unassigned | 592_0   | Clustered           | 50 VC_592_0  | 50  | 0.7314 | 1          | 0.7314 | 0 | 0 | 0 | 1 Ref      |
| OM030343 | Unassigned | Unassigned | Unassigned | 149_8   | Clustered           | 66 VC_149_8  | 66  | 0.4565 | 1          | 0.4565 | 0 | 0 | 0 | 0.8182 Ref |
| OM032871 | Unassigned | Unassigned | Unassigned | 938_0   | Clustered           | 99 VC_938_0  | 99  | 0.9119 | 1          | 0.9119 | 0 | 0 | 0 | 0.9928 Ref |
| OM033133 | Unassigned | Unassigned | Unassigned | 639_0   | Clustered           | 2 VC_639_0   | 2   | 0.2791 | 0.95526917 | 0.2666 | 0 | 0 | 0 | 1 Ref      |
| OM033134 | Unassigned | Unassigned | Unassigned | 865_3   | Clustered           | 2 VC_865_3   | 2   | 0.0748 | 0.93469061 | 0.0699 | 0 | 0 | 0 | 1 Ref      |
| OM033135 | Unassigned | Unassigned | Unassigned | 865_3   | Clustered           | 2 VC_865_3   | 2   | 0.0748 | 0.93469061 | 0.0699 | 0 | 0 | 0 | 1 Ref      |
| OM033136 | Unassigned | Unassigned | Unassigned | 865_4   | Clustered/Singleton | 1 VC_865_4   | 1   | 0      | 1          | 0      | 0 | 0 | 0 | 1 Ref      |
| OM046621 | Unassigned | Unassigned | Unassigned | 37_0    | Clustered           | 5 VC_37_0    | 5   | 0.5393 | 0.99999987 | 0.5393 | 0 | 0 | 0 | 1 Ref      |
| OM046622 | Unassigned | Unassigned | Unassigned | 37_0    | Clustered           | 5 VC_37_0    | 5   | 0.5393 | 0.99999987 | 0.5393 | 0 | 0 | 0 | 1 Ref      |
| OM046623 | Unassigned | Unassigned | Unassigned | 37_0    | Clustered           | 5 VC_37_0    | 5   | 0.5393 | 0.99999987 | 0.5393 | 0 | 0 | 0 | 1 Ref      |
| OM046625 | Unassigned | Unassigned | Unassigned | 37_0    | Clustered           | 5 VC_37_0    | 5   | 0.5393 | 0.99999987 | 0.5393 | 0 | 0 | 0 | 1 Ref      |
| OM046626 | Unassigned | Unassigned | Unassigned | 228_0   | Clustered           | 60 VC_228_0  | 60  | 0.942  | 1          | 0.942  | 0 | 0 | 0 | 1 Ref      |
| OM046627 | Unassigned | Unassigned | Unassigned | 228_0   | Clustered           | 60 VC_228_0  | 60  | 0.942  | 1          | 0.942  | 0 | 0 | 0 | 1 Ref      |
| OM046628 | Unassigned | Unassigned | Unassigned | 228_0   | Clustered           | 60 VC_228_0  | 60  | 0.942  | 1          | 0.942  | 0 | 0 | 0 | 1 Ref      |
| OM046629 | Unassigned | Unassigned | Unassigned | 37_0    | Clustered           | 5 VC_37_0    | 5   | 0.5393 | 0.99999987 | 0.5393 | 0 | 0 | 0 | 1 Ref      |
| OM055665 | Unassigned | Unassigned | Unassigned | 363_0   | Clustered           | 2 VC_363_0   | 2   | 0.8022 | 0.72985431 | 0.5855 | 0 | 0 | 0 | 1 Ref      |
| OM065837 | Unassigned | Unassigned | Unassigned | 937_0   | Clustered           | 40 VC_937_0  | 40  | 0.6809 | 1          | 0.6809 | 0 | 0 | 0 | 0.9359 Ref |
| OM065838 | Unassigned | Unassigned | Unassigned | 937_0   | Clustered           | 40 VC_937_0  | 40  | 0.6809 | 1          | 0.6809 | 0 | 0 | 0 | 0.9359 Ref |
| OM065839 | Unassigned | Unassigned | Unassigned | 937_0   | Clustered           | 40 VC_937_0  | 40  | 0.6809 | 1          | 0.6809 | 0 | 0 | 0 | 0.9359 Ref |
| OM065840 | Unassigned | Unassigned | Unassigned | 938_0   | Clustered           | 99 VC_938_0  | 99  | 0.9119 | 1          | 0.9119 | 0 | 0 | 0 | 0.9928 Ref |
| OM065841 | Unassigned | Unassigned | Unassigned | 937_0   | Clustered           | 40 VC_937_0  | 40  | 0.6809 | 1          | 0.6809 | 0 | 0 | 0 | 0.9359 Ref |
| OM065842 | Unassigned | Unassigned | Unassigned | 938_0   | Clustered           | 99 VC_938_0  | 99  | 0.9119 | 1          | 0.9119 | 0 | 0 | 0 | 0.9928 Ref |
| OM065843 | Unassigned | Unassigned | Unassigned | 938_0   | Clustered           | 99 VC_938_0  | 99  | 0.9119 | 1          | 0.9119 | 0 | 0 | 0 | 0.9928 Ref |
| OM095401 | Unassigned | Unassigned | Unassigned | 5_0     | Clustered           | 30 VC_5_0    | 30  | 0.9647 | 1          | 0.9647 | 0 | 0 | 0 | 1 Ref      |
| OM103621 | Unassigned | Unassigned | Unassigned | 668_0   | Clustered           | 25 VC_668_0  | 25  | 0.5539 | 1          | 0.5539 | 0 | 0 | 0 | 0.96 Ref   |
| OM105884 | Unassigned | Unassigned | Unassigned | 325_62  | Clustered           | 3 VC_325_62  | 3   | 0.0188 | 0.99859194 | 0.0188 | 0 | 0 | 0 | 1 Ref      |
| OM105885 | Unassigned | Unassigned | Unassigned | 520_54  | Clustered/Singleton | 1 VC_520_54  | 1   | 0      | 1          | 0      | 0 | 0 | 0 | 1 Ref      |
| OM105886 | Unassigned | Unassigned | Unassigned | 510_0   | Clustered           | 12 VC_510_0  | 12  | 0.3963 | 1          | 0.3963 | 0 | 0 | 0 | 0.9697 Ref |
| OM131411 | Unassigned | Unassigned | Unassigned | 130_0   | Clustered           | 19 VC_130_0  | 19  | 0.6068 | 1          | 0.6068 | 0 | 0 | 0 | 1 Ref      |
| OM135583 | Unassigned | Unassigned | Unassigned | 283_167 | Clustered/Singleton | 1 VC_283_167 | 1   | 0      | 1          | 0      | 0 | 0 | 0 | 1 Ref      |
| OM135608 | Unassigned | Unassigned | Unassigned | 1346_0  | Clustered           | 10 VC_1346_0 | 10  | 0.7784 | 1          | 0.7784 | 0 | 0 | 0 | 1 Ref      |
| OM135992 | Unassigned | Unassigned | Unassigned | 94_0    | Clustered           | 2 VC_94_0    | 2   | 0.1304 | 0.95723134 | 0.1248 | 0 | 0 | 0 | 1 Ref      |
| OM140653 | Unassigned | Unassigned | Unassigned | 228_0   | Clustered           | 60 VC_228_0  | 60  | 0.942  | 1          | 0.942  | 0 | 0 | 0 | 1 Ref      |
| OM140839 | Unassigned | Unassigned | Unassigned | 725_0   | Clustered           | 4 VC_725_0   | 4   | 0.4268 | 0.99997355 | 0.4268 | 0 | 0 | 0 | 1 Ref      |
| OM141125 | Unassigned | Unassigned | Unassigned | 176_2   | Clustered/Singleton | 1 VC_176_2   | 1   | 0      | 1          | 0      | 0 | 0 | 0 | 1 Ref      |
| OM194188 | Unassigned | Unassigned | Unassigned | 823_0   | Clustered           | 124 VC_823_0 | 124 | 0.9492 | 1          | 0.9492 | 0 | 0 | 0 | 1 Ref      |
| OM194189 | Unassigned | Unassigned | Unassigned | 823_0   | Clustered           | 124 VC_823_0 | 124 | 0.9492 | 1          | 0.9492 | 0 | 0 | 0 | 1 Ref      |
| OM194190 | Unassigned | Unassigned | Unassigned | 823_0   | Clustered           | 124 VC_823_0 | 124 | 0.9492 | 1          | 0.9492 | 0 | 0 | 0 | 1 Ref      |
| OM203156 | Unassigned | Unassigned | Unassigned | 869_0   | Clustered           | 9 VC_869_0   | 9   | 0.2624 | 1          | 0.2624 | 0 | 0 | 0 | 1 Ref      |
| OM203157 | Unassigned | Unassigned | Unassigned | 1171_0  | Clustered           | 21 VC_1171_0 | 21  | 0.7125 | 1          | 0.7125 | 0 | 0 | 0 | 1 Ref      |
| OM203158 | Unassigned | Unassigned | Unassigned | 222_0   | Clustered           | 5 VC_222_0   | 5   | 0.0565 | 0.99999997 | 0.0565 | 0 | 0 | 0 | 1 Ref      |
| OM203159 | Unassigned | Unassigned | Unassigned | 216_4   | Clustered           | 13 VC_216_4  | 13  | 0.1657 | 1          | 0.1657 | 0 | 0 | 0 | 1 Ref      |
| OM203160 | Unassigned | Unassigned | Unassigned | 1175_0  | Clustered           | 22 VC_1175_0 | 22  | 0.4562 | 1          | 0.4562 | 0 | 0 | 0 | 1 Ref      |
| OM203161 | Unassigned | Unassigned | Unassigned | 220_0   | Clustered           | 4 VC_220_0   | 4   | 0.0615 | 0.99998802 | 0.0615 | 0 | 0 | 0 | 1 Ref      |
| OM203162 | Unassigned | Unassigned | Unassigned | 325_33  | Clustered           | 4 VC_325_33  | 4   | 0.0149 | 0.99998565 | 0.0149 | 0 | 0 | 0 | 1 Ref      |
| OM210019 | Unassigned | Unassigned | Unassigned | 637_0   | Clustered           | 115 VC_637_0 | 115 | 0.731  | 1          | 0.731  | 0 | 0 | 0 | 0.8764 Ref |
| OM223115 | Unassigned | Unassigned | Unassigned | 725_0   | Clustered           | 4 VC_725_0   | 4   | 0.4268 | 0.99997355 | 0.4268 | 0 | 0 | 0 | 1 Ref      |
| OM234791 | Unassigned | Unassigned | Unassigned | 749_0   | Clustered           | 40 VC_749_0  | 40  | 0.7517 | 1          | 0.7517 | 0 | 0 | 0 | 1 Ref      |
| OM234792 | Unassigned | Unassigned | Unassigned | 838_0   | Clustered           | 29 VC_838_0  | 29  | 0.8611 | 1          | 0.8611 | 0 | 0 | 0 | 1 Ref      |
| OM234793 | Unassigned | Unassigned | Unassigned | 112_0   | Clustered           | 8 VC_112_0   | 8   | 0.2537 | 1          | 0.2537 | 0 | 0 | 0 | 1 Ref      |
| OM236513 | Unassigned | Unassigned | Unassigned | 87_0    | Clustered           | 8 VC_87_0    | 8   | 0.5545 | 1          | 0.5545 | 0 | 0 | 0 | 1 Ref      |
| OM236514 | Unassigned | Unassigned | Unassigned | 18_0    | Clustered           | 4 VC_18_0    | 4   | 0.9098 | 0.99982347 | 0.9096 | 0 | 0 | 0 | 1 Ref      |
| OM236515 | Unassigned | Unassigned | Unassigned | 89_6    | Clustered/Singleton | 1 VC_89_6    | 1   | 0      | 1          | 0      | 0 | 0 | 0 | 1 Ref      |
| OM236516 | Unassigned | Unassigned | Unassigned | 475_0   | Clustered           | 3 VC_475_0   | 3   | 0.0778 | 0.99798375 | 0.0776 | 0 | 0 | 0 | 1 Ref      |
| OM249648 | Unassigned | Unassigned | Unassigned | 845_0   | Clustered           | 3 VC_845_0   | 3   | 0.3348 | 0.99831497 | 0.3343 | 0 | 0 | 0 | 1 Ref      |
| OM249958 | Unassigned | Unassigned | Unassigned | 817_0   | Clustered           | 14 VC_817_0  | 14  | 0.6342 | 1          | 0.6342 | 0 | 0 | 0 | 1 Ref      |
| OM256450 | Unassigned | Unassigned | Unassigned | 129_0   | Clustered           | 43 VC_129_0  | 43  | 0.886  | 1          | 0.886  | 0 | 0 | 0 | 1 Ref      |
| OM256482 | Unassigned | Unassigned | Unassigned | 451_0   | Clustered           | 80 VC_451_0  | 80  | 0.9991 | 1          | 0.9991 | 0 | 0 | 0 | 1 Ref      |
| OM258170 | Unassigned | Unassigned | Unassigned | 456_0   | Clustered           | 62 VC_456_0  | 62  | 0.9026 | 1          | 0.9026 | 0 | 0 | 0 | 1 Ref      |
| OM262540 | Unassigned | Unassigned | Unassigned | 835_0   | Clustered           | 67 VC_835_0  | 67  | 0.9624 | 1          | 0.9624 | 0 | 0 | 0 | 1 Ref      |
| OM262541 | Unassigned | Unassigned | Unassigned | 835_0   | Clustered           | 67 VC_835_0  | 67  | 0.9624 | 1          | 0.9624 | 0 | 0 | 0 | 1 Ref      |
| OM272052 | Unassigned | Unassigned | Unassigned | 638_0   | Clustered           | 45 VC_638_0  | 45  | 0.7741 | 1          | 0.7741 | 0 | 0 | 0 | 1 Ref      |
| OM282085 | Unassigned | Unassigned | Unassigned | 129_0   | Clustered           | 43 VC_129_0  | 43  | 0.886  | 1          | 0.886  | 0 | 0 | 0 | 1 Ref      |



|          |            |            |            |         |                     |              |     |        |            |        |   |   |   |        |     |
|----------|------------|------------|------------|---------|---------------------|--------------|-----|--------|------------|--------|---|---|---|--------|-----|
| OM283127 | Unassigned | Unassigned | Unassigned | 162_0   | Clustered           | 18 VC_162_0  | 18  | 0.7403 | 1          | 0.7403 | 0 | 0 | 0 | 0.8627 | Ref |
| OM284015 | Unassigned | Unassigned | Unassigned | 242_1   | Clustered           | 20 VC_242_1  | 20  | 0.684  | 1          | 0.684  | 0 | 0 | 0 | 0.8368 | Ref |
| OM287554 | Unassigned | Unassigned | Unassigned | 500_0   | Clustered           | 3 VC_500_0   | 3   | 0.8278 | 0.9969176  | 0.8253 | 0 | 0 | 0 | 1      | Ref |
| OM291373 | Unassigned | Unassigned | Unassigned | 637_0   | Clustered           | 115 VC_637_0 | 115 | 0.731  | 1          | 0.731  | 0 | 0 | 0 | 0.8764 | Ref |
| OM293948 | Unassigned | Unassigned | Unassigned | 95_0    | Clustered           | 3 VC_95_0    | 3   | 0.2092 | 0.99852577 | 0.2089 | 0 | 0 | 0 | 1      | Ref |
| OM304382 | Unassigned | Unassigned | Unassigned | 3_0     | Clustered           | 17 VC_3_0    | 17  | 0.5639 | 1          | 0.5639 | 0 | 0 | 0 | 1      | Ref |
| OM304856 | Unassigned | Unassigned | Unassigned | 8_0     | Clustered           | 58 VC_8_0    | 58  | 0.8306 | 1          | 0.8306 | 0 | 0 | 0 | 0.9946 | Ref |
| OM313460 | Unassigned | Unassigned | Unassigned | 428_0   | Clustered           | 33 VC_428_0  | 33  | 0.9915 | 1          | 0.9915 | 0 | 0 | 0 | 1      | Ref |
| OM313461 | Unassigned | Unassigned | Unassigned | 428_0   | Clustered           | 33 VC_428_0  | 33  | 0.9915 | 1          | 0.9915 | 0 | 0 | 0 | 1      | Ref |
| OM317910 | Unassigned | Unassigned | Unassigned | 585_3   | Clustered/Singleton | 1 VC_585_3   | 1   | 0      | 1          | 0      | 0 | 0 | 0 | 1      | Ref |
| OM319461 | Unassigned | Unassigned | Unassigned | 346_1   | Clustered           | 2 VC_346_1   | 2   | 0.1238 | 0.95353448 | 0.1181 | 0 | 0 | 0 | 1      | Ref |
| OM328157 | Unassigned | Unassigned | Unassigned | 937_0   | Clustered           | 40 VC_937_0  | 40  | 0.6809 | 1          | 0.6809 | 0 | 0 | 0 | 0.9359 | Ref |
| OM337876 | Unassigned | Unassigned | Unassigned | 491_0   | Clustered           | 36 VC_491_0  | 36  | 0.5336 | 1          | 0.5336 | 0 | 0 | 0 | 0.9714 | Ref |
| OM337877 | Unassigned | Unassigned | Unassigned | 491_0   | Clustered           | 36 VC_491_0  | 36  | 0.5336 | 1          | 0.5336 | 0 | 0 | 0 | 0.9714 | Ref |
| OM339528 | Unassigned | Unassigned | Unassigned | 283_92  | Clustered           | 4 VC_283_92  | 4   | 0.0079 | 0.9999582  | 0.0079 | 0 | 0 | 0 | 1      | Ref |
| OM339548 | Unassigned | Unassigned | Unassigned | 637_0   | Clustered           | 115 VC_637_0 | 115 | 0.731  | 1          | 0.731  | 0 | 0 | 0 | 0.8764 | Ref |
| OM339718 | Unassigned | Unassigned | Unassigned | 443_2   | Clustered           | 10 VC_443_2  | 10  | 0.3344 | 1          | 0.3344 | 0 | 0 | 0 | 0.9333 | Ref |
| OM350011 | Unassigned | Unassigned | Unassigned | 883_1   | Clustered           | 12 VC_883_1  | 12  | 0.2441 | 1          | 0.2441 | 0 | 0 | 0 | 1      | Ref |
| OM350012 | Unassigned | Unassigned | Unassigned | 884_0   | Clustered           | 28 VC_884_0  | 28  | 0.6211 | 1          | 0.6211 | 0 | 0 | 0 | 0.9841 | Ref |
| OM350013 | Unassigned | Unassigned | Unassigned | 884_0   | Clustered           | 28 VC_884_0  | 28  | 0.6211 | 1          | 0.6211 | 0 | 0 | 0 | 0.9841 | Ref |
| OM355495 | Unassigned | Unassigned | Unassigned | 451_0   | Clustered           | 80 VC_451_0  | 80  | 0.9991 | 1          | 0.9991 | 0 | 0 | 0 | 1      | Ref |
| OM362522 | Unassigned | Unassigned | Unassigned | 837_0   | Clustered           | 29 VC_837_0  | 29  | 0.9955 | 1          | 0.9955 | 0 | 0 | 0 | 1      | Ref |
| OM362897 | Unassigned | Unassigned | Unassigned | 847_1   | Clustered           | 26 VC_847_1  | 26  | 0.6323 | 1          | 0.6323 | 0 | 0 | 0 | 0.9815 | Ref |
| OM367911 | Unassigned | Unassigned | Unassigned | 133_20  | Clustered/Singleton | 1 VC_133_20  | 1   | 0      | 1          | 0      | 0 | 0 | 0 | 1      | Ref |
| OM373202 | Unassigned | Unassigned | Unassigned | 682_0   | Clustered           | 2 VC_682_0   | 2   | 1      | 1          | 1      | 0 | 0 | 0 | 1      | Ref |
| OM373550 | Unassigned | Unassigned | Unassigned | 15_1    | Clustered           | 9 VC_15_1    | 9   | 0.182  | 1          | 0.182  | 0 | 0 | 0 | 0.8889 | Ref |
| OM373551 | Unassigned | Unassigned | Unassigned | 11_0    | Clustered           | 19 VC_11_0   | 19  | 0.7562 | 1          | 0.7562 | 0 | 0 | 0 | 1      | Ref |
| OM373552 | Unassigned | Unassigned | Unassigned | 11_0    | Clustered           | 19 VC_11_0   | 19  | 0.7562 | 1          | 0.7562 | 0 | 0 | 0 | 1      | Ref |
| OM373553 | Unassigned | Unassigned | Unassigned | 11_0    | Clustered           | 19 VC_11_0   | 19  | 0.7562 | 1          | 0.7562 | 0 | 0 | 0 | 1      | Ref |
| OM373554 | Unassigned | Unassigned | Unassigned | 15_1    | Clustered           | 9 VC_15_1    | 9   | 0.182  | 1          | 0.182  | 0 | 0 | 0 | 0.8889 | Ref |
| OM373555 | Unassigned | Unassigned | Unassigned | 15_1    | Clustered           | 9 VC_15_1    | 9   | 0.182  | 1          | 0.182  | 0 | 0 | 0 | 0.8889 | Ref |
| OM373556 | Unassigned | Unassigned | Unassigned | 15_1    | Clustered           | 9 VC_15_1    | 9   | 0.182  | 1          | 0.182  | 0 | 0 | 0 | 0.8889 | Ref |
| OM373557 | Unassigned | Unassigned | Unassigned | 149_8   | Clustered           | 66 VC_149_8  | 66  | 0.4565 | 1          | 0.4565 | 0 | 0 | 0 | 0.8182 | Ref |
| OM373558 | Unassigned | Unassigned | Unassigned | 15_0    | Clustered           | 3 VC_15_0    | 3   | 0.0481 | 0.9985346  | 0.048  | 0 | 0 | 0 | 1      | Ref |
| OM373561 | Unassigned | Unassigned | Unassigned | 15_1    | Clustered           | 9 VC_15_1    | 9   | 0.182  | 1          | 0.182  | 0 | 0 | 0 | 0.8889 | Ref |
| OM386652 | Unassigned | Unassigned | Unassigned | 722_0   | Clustered           | 13 VC_722_0  | 13  | 0.5104 | 1          | 0.5104 | 0 | 0 | 0 | 1      | Ref |
| OM386653 | Unassigned | Unassigned | Unassigned | 848_0   | Clustered           | 28 VC_848_0  | 28  | 0.7927 | 1          | 0.7927 | 0 | 0 | 0 | 1      | Ref |
| OM386654 | Unassigned | Unassigned | Unassigned | 848_0   | Clustered           | 28 VC_848_0  | 28  | 0.7927 | 1          | 0.7927 | 0 | 0 | 0 | 1      | Ref |
| OM386655 | Unassigned | Unassigned | Unassigned | 290_4   | Clustered           | 2 VC_290_4   | 2   | 0.0092 | 0.90346068 | 0.0083 | 0 | 0 | 0 | 1      | Ref |
| OM386656 | Unassigned | Unassigned | Unassigned | 847_1   | Clustered           | 26 VC_847_1  | 26  | 0.6323 | 1          | 0.6323 | 0 | 0 | 0 | 0.9815 | Ref |
| OM386657 | Unassigned | Unassigned | Unassigned | 190_5   | Clustered/Singleton | 1 VC_190_5   | 1   | 0      | 1          | 0      | 0 | 0 | 0 | 1      | Ref |
| OM386658 | Unassigned | Unassigned | Unassigned | 848_0   | Clustered           | 28 VC_848_0  | 28  | 0.7927 | 1          | 0.7927 | 0 | 0 | 0 | 1      | Ref |
| OM386659 | Unassigned | Unassigned | Unassigned | 847_1   | Clustered           | 26 VC_847_1  | 26  | 0.6323 | 1          | 0.6323 | 0 | 0 | 0 | 0.9815 | Ref |
| OM386660 | Unassigned | Unassigned | Unassigned | 190_8   | Clustered/Singleton | 1 VC_190_8   | 1   | 0      | 1          | 0      | 0 | 0 | 0 | 1      | Ref |
| OM386661 | Unassigned | Unassigned | Unassigned | 329_22  | Clustered           | 5 VC_329_22  | 5   | 0.022  | 0.99999994 | 0.022  | 0 | 0 | 0 | 1      | Ref |
| OM386662 | Unassigned | Unassigned | Unassigned | 286_9   | Clustered/Singleton | 1 VC_286_9   | 1   | 0      | 1          | 0      | 0 | 0 | 0 | 1      | Ref |
| OM386663 | Unassigned | Unassigned | Unassigned | 329_22  | Clustered           | 5 VC_329_22  | 5   | 0.022  | 0.99999994 | 0.022  | 0 | 0 | 0 | 1      | Ref |
| OM386664 | Unassigned | Unassigned | Unassigned | 329_22  | Clustered           | 5 VC_329_22  | 5   | 0.022  | 0.99999994 | 0.022  | 0 | 0 | 0 | 1      | Ref |
| OM386665 | Unassigned | Unassigned | Unassigned | 329_22  | Clustered           | 5 VC_329_22  | 5   | 0.022  | 0.99999994 | 0.022  | 0 | 0 | 0 | 1      | Ref |
| OM386666 | Unassigned | Unassigned | Unassigned | 283_126 | Clustered/Singleton | 1 VC_283_126 | 1   | 0      | 1          | 0      | 0 | 0 | 0 | 1      | Ref |
| OM386667 | Unassigned | Unassigned | Unassigned | 847_1   | Clustered           | 26 VC_847_1  | 26  | 0.6323 | 1          | 0.6323 | 0 | 0 | 0 | 0.9815 | Ref |
| OM401712 | Unassigned | Unassigned | Unassigned | 348_0   | Clustered           | 22 VC_348_0  | 22  | 0.9602 | 1          | 0.9602 | 0 | 0 | 0 | 1      | Ref |
| OM401713 | Unassigned | Unassigned | Unassigned | 348_0   | Clustered           | 22 VC_348_0  | 22  | 0.9602 | 1          | 0.9602 | 0 | 0 | 0 | 1      | Ref |
| OM401714 | Unassigned | Unassigned | Unassigned | 348_0   | Clustered           | 22 VC_348_0  | 22  | 0.9602 | 1          | 0.9602 | 0 | 0 | 0 | 1      | Ref |
| OM401812 | Unassigned | Unassigned | Unassigned | 848_0   | Clustered           | 28 VC_848_0  | 28  | 0.7927 | 1          | 0.7927 | 0 | 0 | 0 | 1      | Ref |
| OM416763 | Unassigned | Unassigned | Unassigned | 479_0   | Clustered           | 17 VC_479_0  | 17  | 0.9103 | 1          | 0.9103 | 0 | 0 | 0 | 1      | Ref |
| OM416764 | Unassigned | Unassigned | Unassigned | 479_0   | Clustered           | 17 VC_479_0  | 17  | 0.9103 | 1          | 0.9103 | 0 | 0 | 0 | 1      | Ref |
| OM416765 | Unassigned | Unassigned | Unassigned | 479_0   | Clustered           | 17 VC_479_0  | 17  | 0.9103 | 1          | 0.9103 | 0 | 0 | 0 | 1      | Ref |
| OM416766 | Unassigned | Unassigned | Unassigned | 479_0   | Clustered           | 17 VC_479_0  | 17  | 0.9103 | 1          | 0.9103 | 0 | 0 | 0 | 1      | Ref |
| OM416767 | Unassigned | Unassigned | Unassigned | 479_0   | Clustered           | 17 VC_479_0  | 17  | 0.9103 | 1          | 0.9103 | 0 | 0 | 0 | 1      | Ref |
| OM416768 | Unassigned | Unassigned | Unassigned | 479_0   | Clustered           | 17 VC_479_0  | 17  | 0.9103 | 1          | 0.9103 | 0 | 0 | 0 | 1      | Ref |
| OM416769 | Unassigned | Unassigned | Unassigned | 479_0   | Clustered           | 17 VC_479_0  | 17  | 0.9103 | 1          | 0.9103 | 0 | 0 | 0 | 1      | Ref |
| OM416770 | Unassigned | Unassigned | Unassigned | 479_0   | Clustered           | 17 VC_479_0  | 17  | 0.9103 | 1          | 0.9103 | 0 | 0 | 0 | 1      | Ref |
| OM416771 | Unassigned | Unassigned | Unassigned | 479_0   | Clustered           | 17 VC_479_0  | 17  | 0.9103 | 1          | 0.9103 | 0 | 0 | 0 | 1      | Ref |
| OM416772 | Unassigned | Unassigned | Unassigned | 479_0   | Clustered           | 17 VC_479_0  | 17  | 0.9103 | 1          | 0.9103 | 0 | 0 | 0 | 1      | Ref |
| OM416773 | Unassigned | Unassigned | Unassigned | 479_0   | Clustered           | 17 VC_479_0  | 17  | 0.9103 | 1          | 0.9103 | 0 | 0 | 0 | 1      | Ref |
| OM416774 | Unassigned | Unassigned | Unassigned | 479_0   | Clustered           | 17 VC_479_0  | 17  | 0.9103 | 1          | 0.9103 | 0 | 0 | 0 | 1      | Ref |
| OM416775 | Unassigned | Unassigned | Unassigned | 479_0   | Clustered           | 17 VC_479_0  | 17  | 0.9103 | 1          | 0.9103 | 0 | 0 | 0 | 1      | Ref |
| OM416776 | Unassigned | Unassigned | Unassigned | 479_0   | Clustered           | 17 VC_479_0  | 17  | 0.9103 | 1          | 0.9103 | 0 | 0 | 0 | 1      | Ref |
| OM416777 | Unassigned | Unassigned | Unassigned | 479_0   | Clustered           | 17 VC_479_0  | 17  | 0.9103 | 1          | 0.9103 | 0 | 0 | 0 | 1      | Ref |
| OM416778 | Unassigned | Unassigned | Unassigned | 479_0   | Clustered           | 17 VC_479_0  | 17  | 0.9103 | 1          | 0.9103 | 0 | 0 | 0 | 1      | Ref |
| OM416779 | Unassigned | Unassigned | Unassigned | 479_0   | Clustered           | 17 VC_479_0  | 17  | 0.9103 | 1          | 0.9103 | 0 | 0 | 0 | 1      | Ref |
| OM418625 | Unassigned | Unassigned | Unassigned | 43_0    | Clustered           | 38 VC_43_0   | 38  | 0.5885 | 1          | 0.5885 | 0 | 0 | 0 | 0.9659 | Ref |
| OM418626 | Unassigned | Unassigned | Unassigned | 43_0    | Clustered           | 38 VC_43_0   | 38  | 0.5885 | 1          | 0.5885 | 0 | 0 | 0 | 0.9659 | Ref |
| OM418627 | Unassigned | Unassigned | Unassigned | 43_0    | Clustered           | 38 VC_43_0   | 38  | 0.5885 | 1          | 0.5885 | 0 | 0 | 0 | 0.9659 | Ref |
| OM421595 | Unassigned | Unassigned | Unassigned | 77_0    | Clustered           | 20 VC_77_0   | 20  | 0.9657 | 1          | 0.9657 | 0 | 0 | 0 | 1      | Ref |
| OM439662 | Unassigned | Unassigned | Unassigned | 9_0     | Clustered           | 38 VC_9_0    | 38  | 0.4895 | 1          | 0.4895 | 0 | 0 | 0 | 1      | Ref |
| OM439663 | Unassigned | Unassigned | Unassigned | 12_0    | Clustered           | 21 VC_12_0   | 21  | 0.2274 | 1          | 0.2274 | 0 | 0 | 0 | 0.9571 | Ref |
| OM439664 | Unassigned | Unassigned | Unassigned | 7_0     | Clustered           | 28 VC_7_0    | 28  | 0.3916 | 1          | 0.3916 | 0 | 0 | 0 | 0.9947 | Ref |
| OM439665 | Unassigned | Unassigned | Unassigned | 8_0     | Clustered           | 58 VC_8_0    | 58  | 0.8306 | 1          | 0.8306 | 0 | 0 | 0 | 0.9946 | Ref |
| OM439666 | Unassigned | Unassigned | Unassigned | 9_0     | Clustered           | 38 VC_9_0    | 38  | 0.4895 | 1          | 0.4895 | 0 | 0 | 0 | 1      | Ref |



|          |            |            |            |        |                     |              |     |        |            |        |   |   |   |        |     |
|----------|------------|------------|------------|--------|---------------------|--------------|-----|--------|------------|--------|---|---|---|--------|-----|
| OM439667 | Unassigned | Unassigned | Unassigned | 8_0    | Clustered           | 58 VC_8_0    | 58  | 0.8306 | 1          | 0.8306 | 0 | 0 | 0 | 0.9946 | Ref |
| OM439668 | Unassigned | Unassigned | Unassigned | 9_0    | Clustered           | 38 VC_9_0    | 38  | 0.4895 | 1          | 0.4895 | 0 | 0 | 0 | 1      | Ref |
| OM439669 | Unassigned | Unassigned | Unassigned | 12_0   | Clustered           | 21 VC_12_0   | 21  | 0.2274 | 1          | 0.2274 | 0 | 0 | 0 | 0.9571 | Ref |
| OM439670 | Unassigned | Unassigned | Unassigned | 9_0    | Clustered           | 38 VC_9_0    | 38  | 0.4895 | 1          | 0.4895 | 0 | 0 | 0 | 1      | Ref |
| OM439671 | Unassigned | Unassigned | Unassigned | 9_0    | Clustered           | 38 VC_9_0    | 38  | 0.4895 | 1          | 0.4895 | 0 | 0 | 0 | 1      | Ref |
| OM439672 | Unassigned | Unassigned | Unassigned | 12_0   | Clustered           | 21 VC_12_0   | 21  | 0.2274 | 1          | 0.2274 | 0 | 0 | 0 | 0.9571 | Ref |
| OM439673 | Unassigned | Unassigned | Unassigned | 12_0   | Clustered           | 21 VC_12_0   | 21  | 0.2274 | 1          | 0.2274 | 0 | 0 | 0 | 0.9571 | Ref |
| OM439674 | Unassigned | Unassigned | Unassigned | 12_0   | Clustered           | 21 VC_12_0   | 21  | 0.2274 | 1          | 0.2274 | 0 | 0 | 0 | 0.9571 | Ref |
| OM439675 | Unassigned | Unassigned | Unassigned | 9_0    | Clustered           | 38 VC_9_0    | 38  | 0.4895 | 1          | 0.4895 | 0 | 0 | 0 | 1      | Ref |
| OM456492 | Unassigned | Unassigned | Unassigned | 959_5  | Clustered           | 19 VC_959_5  | 19  | 0.2626 | 1          | 0.2626 | 0 | 0 | 0 | 1      | Ref |
| OM457001 | Unassigned | Unassigned | Unassigned | 284_0  | Clustered           | 3 VC_284_0   | 3   | 0.0495 | 0.99860966 | 0.0494 | 0 | 0 | 0 | 1      | Ref |
| OM457002 | Unassigned | Unassigned | Unassigned | 451_0  | Clustered           | 80 VC_451_0  | 80  | 0.9991 | 1          | 0.9991 | 0 | 0 | 0 | 1      | Ref |
| OM471789 | Unassigned | Unassigned | Unassigned | 129_0  | Clustered           | 43 VC_129_0  | 43  | 0.886  | 1          | 0.886  | 0 | 0 | 0 | 1      | Ref |
| OM471864 | Unassigned | Unassigned | Unassigned | 698_0  | Clustered           | 26 VC_698_0  | 26  | 0.9366 | 1          | 0.9366 | 0 | 0 | 0 | 1      | Ref |
| OM475426 | Unassigned | Unassigned | Unassigned | 228_0  | Clustered           | 60 VC_228_0  | 60  | 0.942  | 1          | 0.942  | 0 | 0 | 0 | 1      | Ref |
| OM475427 | Unassigned | Unassigned | Unassigned | 43_0   | Clustered           | 38 VC_43_0   | 38  | 0.5885 | 1          | 0.5885 | 0 | 0 | 0 | 0.9659 | Ref |
| OM475428 | Unassigned | Unassigned | Unassigned | 43_0   | Clustered           | 38 VC_43_0   | 38  | 0.5885 | 1          | 0.5885 | 0 | 0 | 0 | 0.9659 | Ref |
| OM475429 | Unassigned | Unassigned | Unassigned | 228_0  | Clustered           | 60 VC_228_0  | 60  | 0.942  | 1          | 0.942  | 0 | 0 | 0 | 1      | Ref |
| OM475430 | Unassigned | Unassigned | Unassigned | 43_0   | Clustered           | 38 VC_43_0   | 38  | 0.5885 | 1          | 0.5885 | 0 | 0 | 0 | 0.9659 | Ref |
| OM475431 | Unassigned | Unassigned | Unassigned | 228_0  | Clustered           | 60 VC_228_0  | 60  | 0.942  | 1          | 0.942  | 0 | 0 | 0 | 1      | Ref |
| OM475432 | Unassigned | Unassigned | Unassigned | 43_0   | Clustered           | 38 VC_43_0   | 38  | 0.5885 | 1          | 0.5885 | 0 | 0 | 0 | 0.9659 | Ref |
| OM475433 | Unassigned | Unassigned | Unassigned | 228_0  | Clustered           | 60 VC_228_0  | 60  | 0.942  | 1          | 0.942  | 0 | 0 | 0 | 1      | Ref |
| OM475434 | Unassigned | Unassigned | Unassigned | 228_0  | Clustered           | 60 VC_228_0  | 60  | 0.942  | 1          | 0.942  | 0 | 0 | 0 | 1      | Ref |
| OM475435 | Unassigned | Unassigned | Unassigned | 43_0   | Clustered           | 38 VC_43_0   | 38  | 0.5885 | 1          | 0.5885 | 0 | 0 | 0 | 0.9659 | Ref |
| OM486945 | Unassigned | Unassigned | Unassigned | 453_0  | Clustered           | 6 VC_453_0   | 6   | 0.114  | 1          | 0.114  | 0 | 0 | 0 | 1      | Ref |
| OM513679 | Unassigned | Unassigned | Unassigned | 110_0  | Clustered           | 4 VC_110_0   | 4   | 0.1143 | 0.99998732 | 0.1143 | 0 | 0 | 0 | 1      | Ref |
| OM513680 | Unassigned | Unassigned | Unassigned | 110_0  | Clustered           | 4 VC_110_0   | 4   | 0.1143 | 0.99998732 | 0.1143 | 0 | 0 | 0 | 1      | Ref |
| OM515228 | Unassigned | Unassigned | Unassigned | 99_0   | Clustered           | 32 VC_99_0   | 32  | 0.8828 | 1          | 0.8828 | 0 | 0 | 0 | 1      | Ref |
| OM519319 | Unassigned | Unassigned | Unassigned | 613_0  | Clustered           | 2 VC_613_0   | 2   | 0.0357 | 0.94194318 | 0.0336 | 0 | 0 | 0 | 1      | Ref |
| OM522317 | Unassigned | Unassigned | Unassigned | 328_0  | Clustered           | 11 VC_328_0  | 11  | 0.4707 | 1          | 0.4707 | 0 | 0 | 0 | 1      | Ref |
| OM522999 | Unassigned | Unassigned | Unassigned | 1054_0 | Clustered           | 12 VC_1054_0 | 12  | 0.2863 | 0.99746644 | 0.2855 | 0 | 0 | 0 | 1      | Ref |
| OM523001 | Unassigned | Unassigned | Unassigned | 1054_0 | Clustered           | 12 VC_1054_0 | 12  | 0.2863 | 0.99746644 | 0.2855 | 0 | 0 | 0 | 1      | Ref |
| OM523002 | Unassigned | Unassigned | Unassigned | 995_0  | Clustered           | 69 VC_995_0  | 69  | 0.8547 | 1          | 0.8547 | 0 | 0 | 0 | 1      | Ref |
| OM541307 | Unassigned | Unassigned | Unassigned | 179_0  | Clustered           | 53 VC_179_0  | 53  | 0.9137 | 1          | 0.9137 | 0 | 0 | 0 | 1      | Ref |
| OM621814 | Unassigned | Unassigned | Unassigned | 962_0  | Clustered           | 2 VC_962_0   | 2   | 0.3572 | 0.92263554 | 0.3295 | 0 | 0 | 0 | 1      | Ref |
| OM621816 | Unassigned | Unassigned | Unassigned | 242_1  | Clustered           | 20 VC_242_1  | 20  | 0.684  | 1          | 0.684  | 0 | 0 | 0 | 0.8368 | Ref |
| OM630219 | Unassigned | Unassigned | Unassigned | 491_0  | Clustered           | 36 VC_491_0  | 36  | 0.5336 | 1          | 0.5336 | 0 | 0 | 0 | 0.9714 | Ref |
| OM630585 | Unassigned | Unassigned | Unassigned | 329_3  | Clustered           | 24 VC_329_3  | 24  | 0.1206 | 1          | 0.1206 | 0 | 0 | 0 | 0.7283 | Ref |
| OM630586 | Unassigned | Unassigned | Unassigned | 392_0  | Clustered           | 126 VC_392_0 | 126 | 0.9621 | 1          | 0.9621 | 0 | 0 | 0 | 1      | Ref |
| OM630588 | Unassigned | Unassigned | Unassigned | 603_0  | Clustered           | 9 VC_603_0   | 9   | 0.9925 | 0.99999994 | 0.9925 | 0 | 0 | 0 | 1      | Ref |
| OM630590 | Unassigned | Unassigned | Unassigned | 129_0  | Clustered           | 43 VC_129_0  | 43  | 0.886  | 1          | 0.886  | 0 | 0 | 0 | 1      | Ref |
| OM632664 | Unassigned | Unassigned | Unassigned | 779_0  | Clustered           | 37 VC_779_0  | 37  | 0.5682 | 1          | 0.5682 | 0 | 0 | 0 | 1      | Ref |
| OM632665 | Unassigned | Unassigned | Unassigned | 779_0  | Clustered           | 37 VC_779_0  | 37  | 0.5682 | 1          | 0.5682 | 0 | 0 | 0 | 1      | Ref |
| OM632666 | Unassigned | Unassigned | Unassigned | 779_0  | Clustered           | 37 VC_779_0  | 37  | 0.5682 | 1          | 0.5682 | 0 | 0 | 0 | 1      | Ref |
| OM632667 | Unassigned | Unassigned | Unassigned | 638_0  | Clustered           | 45 VC_638_0  | 45  | 0.7741 | 1          | 0.7741 | 0 | 0 | 0 | 1      | Ref |
| OM632668 | Unassigned | Unassigned | Unassigned | 638_0  | Clustered           | 45 VC_638_0  | 45  | 0.7741 | 1          | 0.7741 | 0 | 0 | 0 | 1      | Ref |
| OM632669 | Unassigned | Unassigned | Unassigned | 779_0  | Clustered           | 37 VC_779_0  | 37  | 0.5682 | 1          | 0.5682 | 0 | 0 | 0 | 1      | Ref |
| OM632670 | Unassigned | Unassigned | Unassigned | 779_0  | Clustered           | 37 VC_779_0  | 37  | 0.5682 | 1          | 0.5682 | 0 | 0 | 0 | 1      | Ref |
| OM632671 | Unassigned | Unassigned | Unassigned | 286_7  | Clustered/Singleton | 1 VC_286_7   | 1   | 0      | 1          | 0      | 0 | 0 | 0 | 1      | Ref |
| OM632672 | Unassigned | Unassigned | Unassigned | 779_0  | Clustered           | 37 VC_779_0  | 37  | 0.5682 | 1          | 0.5682 | 0 | 0 | 0 | 1      | Ref |
| OM634653 | Unassigned | Unassigned | Unassigned | 475_0  | Clustered           | 3 VC_475_0   | 3   | 0.0778 | 0.99798375 | 0.0776 | 0 | 0 | 0 | 1      | Ref |
| OM634661 | Unassigned | Unassigned | Unassigned | 90_1   | Clustered/Singleton | 1 VC_90_1    | 1   | 0      | 1          | 0      | 0 | 0 | 0 | 1      | Ref |
| OM638103 | Unassigned | Unassigned | Unassigned | 580_0  | Clustered           | 2 VC_580_0   | 2   | 0.0632 | 0.95763305 | 0.0605 | 0 | 0 | 0 | 1      | Ref |
| OM638104 | Unassigned | Unassigned | Unassigned | 899_0  | Clustered           | 4 VC_899_0   | 4   | 0.2655 | 0.99997104 | 0.2655 | 0 | 0 | 0 | 1      | Ref |
| OM638608 | Unassigned | Unassigned | Unassigned | 3_0    | Clustered           | 17 VC_3_0    | 17  | 0.5639 | 1          | 0.5639 | 0 | 0 | 0 | 1      | Ref |
| OM638609 | Unassigned | Unassigned | Unassigned | 3_0    | Clustered           | 17 VC_3_0    | 17  | 0.5639 | 1          | 0.5639 | 0 | 0 | 0 | 1      | Ref |
| OM638610 | Unassigned | Unassigned | Unassigned | 3_0    | Clustered           | 17 VC_3_0    | 17  | 0.5639 | 1          | 0.5639 | 0 | 0 | 0 | 1      | Ref |
| OM638611 | Unassigned | Unassigned | Unassigned | 3_0    | Clustered           | 17 VC_3_0    | 17  | 0.5639 | 1          | 0.5639 | 0 | 0 | 0 | 1      | Ref |
| OM654379 | Unassigned | Unassigned | Unassigned | 214_1  | Clustered/Singleton | 1 VC_214_1   | 1   | 0      | 1          | 0      | 0 | 0 | 0 | 1      | Ref |
| OM654404 | Unassigned | Unassigned | Unassigned | 878_0  | Clustered           | 32 VC_878_0  | 32  | 0.9965 | 1          | 0.9965 | 0 | 0 | 0 | 1      | Ref |
| OM681507 | Unassigned | Unassigned | Unassigned | 133_14 | Clustered           | 3 VC_133_14  | 3   | 0.0102 | 0.96327256 | 0.0098 | 0 | 0 | 0 | 1      | Ref |
| OM687511 | Unassigned | Unassigned | Unassigned | 779_3  | Clustered           | 7 VC_779_3   | 7   | 0.0766 | 1          | 0.0766 | 0 | 0 | 0 | 0.7143 | Ref |
| OM687892 | Unassigned | Unassigned | Unassigned | 836_0  | Clustered           | 9 VC_836_0   | 9   | 0.7733 | 1          | 0.7733 | 0 | 0 | 0 | 1      | Ref |
| OM687893 | Unassigned | Unassigned | Unassigned | 938_0  | Clustered           | 99 VC_938_0  | 99  | 0.9119 | 1          | 0.9119 | 0 | 0 | 0 | 0.9928 | Ref |
| OM688977 | Unassigned | Unassigned | Unassigned | 133_32 | Clustered/Singleton | 1 VC_133_32  | 1   | 0      | 1          | 0      | 0 | 0 | 0 | 1      | Ref |
| OM732336 | Unassigned | Unassigned | Unassigned | 500_0  | Clustered           | 3 VC_500_0   | 3   | 0.8278 | 0.9969176  | 0.8253 | 0 | 0 | 0 | 1      | Ref |
| OM732337 | Unassigned | Unassigned | Unassigned | 500_0  | Clustered           | 3 VC_500_0   | 3   | 0.8278 | 0.9969176  | 0.8253 | 0 | 0 | 0 | 1      | Ref |
| OM735690 | Unassigned | Unassigned | Unassigned | 937_0  | Clustered           | 40 VC_937_0  | 40  | 0.6809 | 1          | 0.6809 | 0 | 0 | 0 | 0.9359 | Ref |
| OM743306 | Unassigned | Unassigned | Unassigned | 883_6  | Clustered/Singleton | 1 VC_883_6   | 1   | 0      | 1          | 0      | 0 | 0 | 0 | 1      | Ref |
| OM782324 | Unassigned | Unassigned | Unassigned | 1402_0 | Clustered           | 14 VC_1402_0 | 14  | 0.1673 | 0.51390354 | 0.086  | 0 | 0 | 0 | 1      | Ref |
| OM782452 | Unassigned | Unassigned | Unassigned | 839_0  | Clustered           | 5 VC_839_0   | 5   | 0.165  | 0.99999995 | 0.165  | 0 | 0 | 0 | 1      | Ref |
| OM793623 | Unassigned | Unassigned | Unassigned | 574_0  | Clustered           | 7 VC_574_0   | 7   | 0.2734 | 1          | 0.2734 | 0 | 0 | 0 | 1      | Ref |
| OM799543 | Unassigned | Unassigned | Unassigned | 837_0  | Clustered           | 29 VC_837_0  | 29  | 0.9955 | 1          | 0.9955 | 0 | 0 | 0 | 1      | Ref |
| OM809160 | Unassigned | Unassigned | Unassigned | 166_0  | Clustered           | 26 VC_166_0  | 26  | 0.7923 | 1          | 0.7923 | 0 | 0 | 0 | 1      | Ref |
| OM810255 | Unassigned | Unassigned | Unassigned | 638_0  | Clustered           | 45 VC_638_0  | 45  | 0.7741 | 1          | 0.7741 | 0 | 0 | 0 | 1      | Ref |
| OM810291 | Unassigned | Unassigned | Unassigned | 793_0  | Clustered           | 12 VC_793_0  | 12  | 0.8531 | 1          | 0.8531 | 0 | 0 | 0 | 1      | Ref |
| OM810292 | Unassigned | Unassigned | Unassigned | 442_4  | Clustered           | 2 VC_442_4   | 2   | 0.0254 | 0.91859498 | 0.0233 | 0 | 0 | 0 | 1      | Ref |
| OM818327 | Unassigned | Unassigned | Unassigned | 1180_0 | Clustered           | 3 VC_1180_0  | 3   | 0.5161 | 0.9981786  | 0.5151 | 0 | 0 | 0 | 1      | Ref |
| OM818328 | Unassigned | Unassigned | Unassigned | 224_0  | Clustered           | 19 VC_224_0  | 19  | 0.9416 | 1          | 0.9416 | 0 | 0 | 0 | 1      | Ref |
| OM818329 | Unassigned | Unassigned | Unassigned | 1234_0 | Clustered           | 44 VC_1234_0 | 44  | 1      | 1          | 1      | 0 | 0 | 0 | 1      | Ref |
| OM818330 | Unassigned | Unassigned | Unassigned | 236_0  | Clustered           | 72 VC_236_0  | 72  | 0.8104 | 1          | 0.8104 | 0 | 0 | 0 | 1      | Ref |



|          |            |            |            |        |           |               |     |        |            |        |   |   |   |       |
|----------|------------|------------|------------|--------|-----------|---------------|-----|--------|------------|--------|---|---|---|-------|
| OM818331 | Unassigned | Unassigned | Unassigned | 1170_2 | Clustered | 2 VC_1170_2   | 2   | 0.0769 | 0.95418906 | 0.0734 | 0 | 0 | 0 | 1 Ref |
| OM837731 | Unassigned | Unassigned | Unassigned | 909_0  | Clustered | 5 VC_909_0    | 5   | 0.7406 | 0.9999861  | 0.7406 | 0 | 0 | 0 | 1 Ref |
| OM850391 | Unassigned | Unassigned | Unassigned | 149_1  | Clustered | 3 VC_149_1    | 3   | 0.0128 | 0.99303953 | 0.0127 | 0 | 0 | 0 | 1 Ref |
| OM850392 | Unassigned | Unassigned | Unassigned | 149_1  | Clustered | 3 VC_149_1    | 3   | 0.0128 | 0.99303953 | 0.0127 | 0 | 0 | 0 | 1 Ref |
| OM858838 | Unassigned | Unassigned | Unassigned | 780_0  | Clustered | 8 VC_780_0    | 8   | 0.5207 | 1          | 0.5207 | 0 | 0 | 0 | 1 Ref |
| OM864357 | Unassigned | Unassigned | Unassigned | 111_0  | Clustered | 91 VC_111_0   | 91  | 0.9587 | 1          | 0.9587 | 0 | 0 | 0 | 1 Ref |
| OM867676 | Unassigned | Unassigned | Unassigned | 451_0  | Clustered | 80 VC_451_0   | 80  | 0.9991 | 1          | 0.9991 | 0 | 0 | 0 | 1 Ref |
| OM869494 | Unassigned | Unassigned | Unassigned | 1275_0 | Clustered | 4 VC_1275_0   | 4   | 1      | 1          | 1      | 0 | 0 | 0 | 1 Ref |
| OM869497 | Unassigned | Unassigned | Unassigned | 1069_0 | Clustered | 4 VC_1069_0   | 4   | 1      | 1          | 1      | 0 | 0 | 0 | 1 Ref |
| OM869498 | Unassigned | Unassigned | Unassigned | 1308_0 | Clustered | 12 VC_1308_0  | 12  | 0.8184 | 0.9810731  | 0.8029 | 0 | 0 | 0 | 1 Ref |
| OM869500 | Unassigned | Unassigned | Unassigned | 1282_0 | Clustered | 3 VC_1282_0   | 3   | 1      | 1          | 1      | 0 | 0 | 0 | 1 Ref |
| OM869502 | Unassigned | Unassigned | Unassigned | 1308_0 | Clustered | 12 VC_1308_0  | 12  | 0.8184 | 0.9810731  | 0.8029 | 0 | 0 | 0 | 1 Ref |
| OM869503 | Unassigned | Unassigned | Unassigned | 1119_0 | Clustered | 20 VC_1119_0  | 20  | 0.6751 | 0.99997892 | 0.6751 | 0 | 0 | 0 | 1 Ref |
| OM869505 | Unassigned | Unassigned | Unassigned | 1308_0 | Clustered | 12 VC_1308_0  | 12  | 0.8184 | 0.9810731  | 0.8029 | 0 | 0 | 0 | 1 Ref |
| OM869510 | Unassigned | Unassigned | Unassigned | 1468_0 | Clustered | 2 VC_1468_0   | 2   | 1      | 1          | 1      | 0 | 0 | 0 | 1 Ref |
| OM869512 | Unassigned | Unassigned | Unassigned | 1468_0 | Clustered | 2 VC_1468_0   | 2   | 1      | 1          | 1      | 0 | 0 | 0 | 1 Ref |
| OM869513 | Unassigned | Unassigned | Unassigned | 1145_0 | Clustered | 5 VC_1145_0   | 5   | 0.8807 | 0.99921062 | 0.8801 | 0 | 0 | 0 | 1 Ref |
| OM869514 | Unassigned | Unassigned | Unassigned | 1321_0 | Clustered | 14 VC_1321_0  | 14  | 0.826  | 1          | 0.826  | 0 | 0 | 0 | 1 Ref |
| OM869516 | Unassigned | Unassigned | Unassigned | 1145_0 | Clustered | 5 VC_1145_0   | 5   | 0.8807 | 0.99921062 | 0.8801 | 0 | 0 | 0 | 1 Ref |
| OM869517 | Unassigned | Unassigned | Unassigned | 1133_0 | Clustered | 4 VC_1133_0   | 4   | 0.1253 | 0.975067   | 0.1222 | 0 | 0 | 0 | 1 Ref |
| OM869519 | Unassigned | Unassigned | Unassigned | 1145_0 | Clustered | 5 VC_1145_0   | 5   | 0.8807 | 0.99921062 | 0.8801 | 0 | 0 | 0 | 1 Ref |
| OM869521 | Unassigned | Unassigned | Unassigned | 1280_0 | Clustered | 2 VC_1280_0   | 2   | 0.0695 | 0.94944661 | 0.066  | 0 | 0 | 0 | 1 Ref |
| OM869524 | Unassigned | Unassigned | Unassigned | 1104_0 | Clustered | 154 VC_1104_0 | 154 | 0.8484 | 1          | 0.8484 | 0 | 0 | 0 | 1 Ref |
| OM869525 | Unassigned | Unassigned | Unassigned | 1104_0 | Clustered | 154 VC_1104_0 | 154 | 0.8484 | 1          | 0.8484 | 0 | 0 | 0 | 1 Ref |
| OM869526 | Unassigned | Unassigned | Unassigned | 1104_0 | Clustered | 154 VC_1104_0 | 154 | 0.8484 | 1          | 0.8484 | 0 | 0 | 0 | 1 Ref |
| OM869527 | Unassigned | Unassigned | Unassigned | 1104_0 | Clustered | 154 VC_1104_0 | 154 | 0.8484 | 1          | 0.8484 | 0 | 0 | 0 | 1 Ref |
| OM869528 | Unassigned | Unassigned | Unassigned | 1104_0 | Clustered | 154 VC_1104_0 | 154 | 0.8484 | 1          | 0.8484 | 0 | 0 | 0 | 1 Ref |
| OM869529 | Unassigned | Unassigned | Unassigned | 1321_0 | Clustered | 14 VC_1321_0  | 14  | 0.826  | 1          | 0.826  | 0 | 0 | 0 | 1 Ref |
| OM869531 | Unassigned | Unassigned | Unassigned | 1104_0 | Clustered | 154 VC_1104_0 | 154 | 0.8484 | 1          | 0.8484 | 0 | 0 | 0 | 1 Ref |
| OM869532 | Unassigned | Unassigned | Unassigned | 1058_0 | Clustered | 2 VC_1058_0   | 2   | 0.5063 | 0.72985431 | 0.3695 | 0 | 0 | 0 | 1 Ref |
| OM869533 | Unassigned | Unassigned | Unassigned | 1104_0 | Clustered | 154 VC_1104_0 | 154 | 0.8484 | 1          | 0.8484 | 0 | 0 | 0 | 1 Ref |
| OM869534 | Unassigned | Unassigned | Unassigned | 1104_0 | Clustered | 154 VC_1104_0 | 154 | 0.8484 | 1          | 0.8484 | 0 | 0 | 0 | 1 Ref |
| OM869535 | Unassigned | Unassigned | Unassigned | 1104_0 | Clustered | 154 VC_1104_0 | 154 | 0.8484 | 1          | 0.8484 | 0 | 0 | 0 | 1 Ref |
| OM869537 | Unassigned | Unassigned | Unassigned | 1104_0 | Clustered | 154 VC_1104_0 | 154 | 0.8484 | 1          | 0.8484 | 0 | 0 | 0 | 1 Ref |
| OM869538 | Unassigned | Unassigned | Unassigned | 1104_0 | Clustered | 154 VC_1104_0 | 154 | 0.8484 | 1          | 0.8484 | 0 | 0 | 0 | 1 Ref |
| OM869540 | Unassigned | Unassigned | Unassigned | 1321_0 | Clustered | 14 VC_1321_0  | 14  | 0.826  | 1          | 0.826  | 0 | 0 | 0 | 1 Ref |
| OM869542 | Unassigned | Unassigned | Unassigned | 1321_0 | Clustered | 14 VC_1321_0  | 14  | 0.826  | 1          | 0.826  | 0 | 0 | 0 | 1 Ref |
| OM869543 | Unassigned | Unassigned | Unassigned | 1104_0 | Clustered | 154 VC_1104_0 | 154 | 0.8484 | 1          | 0.8484 | 0 | 0 | 0 | 1 Ref |
| OM869544 | Unassigned | Unassigned | Unassigned | 1321_0 | Clustered | 14 VC_1321_0  | 14  | 0.826  | 1          | 0.826  | 0 | 0 | 0 | 1 Ref |
| OM869545 | Unassigned | Unassigned | Unassigned | 1134_0 | Clustered | 5 VC_1134_0   | 5   | 0.129  | 0.7637089  | 0.0985 | 0 | 0 | 0 | 1 Ref |
| OM869546 | Unassigned | Unassigned | Unassigned | 1104_0 | Clustered | 154 VC_1104_0 | 154 | 0.8484 | 1          | 0.8484 | 0 | 0 | 0 | 1 Ref |
| OM869547 | Unassigned | Unassigned | Unassigned | 1104_0 | Clustered | 154 VC_1104_0 | 154 | 0.8484 | 1          | 0.8484 | 0 | 0 | 0 | 1 Ref |
| OM869548 | Unassigned | Unassigned | Unassigned | 1321_0 | Clustered | 14 VC_1321_0  | 14  | 0.826  | 1          | 0.826  | 0 | 0 | 0 | 1 Ref |
| OM869549 | Unassigned | Unassigned | Unassigned | 1243_0 | Clustered | 52 VC_1243_0  | 52  | 0.9126 | 0.92708311 | 0.8461 | 0 | 0 | 0 | 1 Ref |
| OM869550 | Unassigned | Unassigned | Unassigned | 1104_0 | Clustered | 154 VC_1104_0 | 154 | 0.8484 | 1          | 0.8484 | 0 | 0 | 0 | 1 Ref |
| OM869552 | Unassigned | Unassigned | Unassigned | 1230_0 | Clustered | 3 VC_1230_0   | 3   | 0.4802 | 0.82711071 | 0.3971 | 0 | 0 | 0 | 1 Ref |
| OM869553 | Unassigned | Unassigned | Unassigned | 1321_0 | Clustered | 14 VC_1321_0  | 14  | 0.826  | 1          | 0.826  | 0 | 0 | 0 | 1 Ref |
| OM869555 | Unassigned | Unassigned | Unassigned | 1231_0 | Clustered | 2 VC_1231_0   | 2   | 0.4148 | 0.89331315 | 0.3705 | 0 | 0 | 0 | 1 Ref |
| OM869557 | Unassigned | Unassigned | Unassigned | 1313_0 | Clustered | 13 VC_1313_0  | 13  | 0.8481 | 0.87456432 | 0.7417 | 0 | 0 | 0 | 1 Ref |
| OM869558 | Unassigned | Unassigned | Unassigned | 1125_0 | Clustered | 20 VC_1125_0  | 20  | 0.5599 | 1          | 0.5599 | 0 | 0 | 0 | 1 Ref |
| OM869559 | Unassigned | Unassigned | Unassigned | 1243_0 | Clustered | 52 VC_1243_0  | 52  | 0.9126 | 0.92708311 | 0.8461 | 0 | 0 | 0 | 1 Ref |
| OM869560 | Unassigned | Unassigned | Unassigned | 1243_0 | Clustered | 52 VC_1243_0  | 52  | 0.9126 | 0.92708311 | 0.8461 | 0 | 0 | 0 | 1 Ref |
| OM869561 | Unassigned | Unassigned | Unassigned | 1211_0 | Clustered | 25 VC_1211_0  | 25  | 1      | 1          | 1      | 0 | 0 | 0 | 1 Ref |
| OM869562 | Unassigned | Unassigned | Unassigned | 1243_0 | Clustered | 52 VC_1243_0  | 52  | 0.9126 | 0.92708311 | 0.8461 | 0 | 0 | 0 | 1 Ref |
| OM869563 | Unassigned | Unassigned | Unassigned | 1299_0 | Clustered | 2 VC_1299_0   | 2   | 1      | 1          | 1      | 0 | 0 | 0 | 1 Ref |
| OM869564 | Unassigned | Unassigned | Unassigned | 1197_0 | Clustered | 15 VC_1197_0  | 15  | 0.8991 | 0.76608394 | 0.6888 | 0 | 0 | 0 | 1 Ref |
| OM869565 | Unassigned | Unassigned | Unassigned | 1197_0 | Clustered | 15 VC_1197_0  | 15  | 0.8991 | 0.76608394 | 0.6888 | 0 | 0 | 0 | 1 Ref |
| OM869566 | Unassigned | Unassigned | Unassigned | 1314_0 | Clustered | 4 VC_1314_0   | 4   | 0.6744 | 0.9990299  | 0.6738 | 0 | 0 | 0 | 1 Ref |
| OM869568 | Unassigned | Unassigned | Unassigned | 1314_0 | Clustered | 4 VC_1314_0   | 4   | 0.6744 | 0.9990299  | 0.6738 | 0 | 0 | 0 | 1 Ref |
| OM869569 | Unassigned | Unassigned | Unassigned | 1243_0 | Clustered | 52 VC_1243_0  | 52  | 0.9126 | 0.92708311 | 0.8461 | 0 | 0 | 0 | 1 Ref |
| OM869570 | Unassigned | Unassigned | Unassigned | 1197_0 | Clustered | 15 VC_1197_0  | 15  | 0.8991 | 0.76608394 | 0.6888 | 0 | 0 | 0 | 1 Ref |
| OM869571 | Unassigned | Unassigned | Unassigned | 1294_0 | Clustered | 6 VC_1294_0   | 6   | 0.6626 | 0.99999272 | 0.6626 | 0 | 0 | 0 | 1 Ref |
| OM869572 | Unassigned | Unassigned | Unassigned | 1469_0 | Clustered | 2 VC_1469_0   | 2   | 1      | 1          | 1      | 0 | 0 | 0 | 1 Ref |
| OM869573 | Unassigned | Unassigned | Unassigned | 1469_0 | Clustered | 2 VC_1469_0   | 2   | 1      | 1          | 1      | 0 | 0 | 0 | 1 Ref |
| OM869574 | Unassigned | Unassigned | Unassigned | 1304_0 | Clustered | 7 VC_1304_0   | 7   | 0.7931 | 0.9999998  | 0.7931 | 0 | 0 | 0 | 1 Ref |
| OM869576 | Unassigned | Unassigned | Unassigned | 1304_0 | Clustered | 7 VC_1304_0   | 7   | 0.7931 | 0.9999998  | 0.7931 | 0 | 0 | 0 | 1 Ref |
| OM869577 | Unassigned | Unassigned | Unassigned | 1304_0 | Clustered | 7 VC_1304_0   | 7   | 0.7931 | 0.9999998  | 0.7931 | 0 | 0 | 0 | 1 Ref |
| OM869578 | Unassigned | Unassigned | Unassigned | 1371_0 | Clustered | 5 VC_1371_0   | 5   | 0.7004 | 0.52188382 | 0.3656 | 0 | 0 | 0 | 1 Ref |
| OM869583 | Unassigned | Unassigned | Unassigned | 1470_0 | Clustered | 3 VC_1470_0   | 3   | 1      | 1          | 1      | 0 | 0 | 0 | 1 Ref |
| OM869587 | Unassigned | Unassigned | Unassigned | 1308_0 | Clustered | 12 VC_1308_0  | 12  | 0.8184 | 0.9810731  | 0.8029 | 0 | 0 | 0 | 1 Ref |
| OM869588 | Unassigned | Unassigned | Unassigned | 1458_0 | Clustered | 2 VC_1458_0   | 2   | 1      | 1          | 1      | 0 | 0 | 0 | 1 Ref |
| OM869589 | Unassigned | Unassigned | Unassigned | 1321_0 | Clustered | 14 VC_1321_0  | 14  | 0.826  | 1          | 0.826  | 0 | 0 | 0 | 1 Ref |
| OM869590 | Unassigned | Unassigned | Unassigned | 1321_0 | Clustered | 14 VC_1321_0  | 14  | 0.826  | 1          | 0.826  | 0 | 0 | 0 | 1 Ref |
| OM869592 | Unassigned | Unassigned | Unassigned | 1304_0 | Clustered | 7 VC_1304_0   | 7   | 0.7931 | 0.9999998  | 0.7931 | 0 | 0 | 0 | 1 Ref |
| OM869593 | Unassigned | Unassigned | Unassigned | 1462_0 | Clustered | 4 VC_1462_0   | 4   | 1      | 1          | 1      | 0 | 0 | 0 | 1 Ref |
| OM869594 | Unassigned | Unassigned | Unassigned | 1471_0 | Clustered | 2 VC_1471_0   | 2   | 1      | 1          | 1      | 0 | 0 | 0 | 1 Ref |
| OM869604 | Unassigned | Unassigned | Unassigned | 1308_0 | Clustered | 12 VC_1308_0  | 12  | 0.8184 | 0.9810731  | 0.8029 | 0 | 0 | 0 | 1 Ref |
| OM869606 | Unassigned | Unassigned | Unassigned | 1104_0 | Clustered | 154 VC_1104_0 | 154 | 0.8484 | 1          | 0.8484 | 0 | 0 | 0 | 1 Ref |
| OM869610 | Unassigned | Unassigned | Unassigned | 1211_0 | Clustered | 25 VC_1211_0  | 25  | 1      | 1          | 1      | 0 | 0 | 0 | 1 Ref |
| OM869612 | Unassigned | Unassigned | Unassigned | 1277_0 | Clustered | 14 VC_1277_0  | 14  | 0.8218 | 1          | 0.8218 | 0 | 0 | 0 | 1 Ref |
| OM869623 | Unassigned | Unassigned | Unassigned | 1285_0 | Clustered | 25 VC_1285_0  | 25  | 1      | 1          | 1      | 0 | 0 | 0 | 1 Ref |



|          |            |            |            |        |                     |               |     |        |            |        |   |   |   |            |
|----------|------------|------------|------------|--------|---------------------|---------------|-----|--------|------------|--------|---|---|---|------------|
| OM869624 | Unassigned | Unassigned | Unassigned | 1054_0 | Clustered           | 12 VC_1054_0  | 12  | 0.2863 | 0.99746644 | 0.2855 | 0 | 0 | 0 | 1 Ref      |
| OM869626 | Unassigned | Unassigned | Unassigned | 1309_0 | Clustered           | 2 VC_1309_0   | 2   | 0.309  | 0.72985431 | 0.2255 | 0 | 0 | 0 | 1 Ref      |
| OM869627 | Unassigned | Unassigned | Unassigned | 1120_0 | Clustered           | 7 VC_1120_0   | 7   | 0.2688 | 0.9951868  | 0.2675 | 0 | 0 | 0 | 1 Ref      |
| OM869629 | Unassigned | Unassigned | Unassigned | 1120_0 | Clustered           | 7 VC_1120_0   | 7   | 0.2688 | 0.9951868  | 0.2675 | 0 | 0 | 0 | 1 Ref      |
| OM869632 | Unassigned | Unassigned | Unassigned | 1394_0 | Clustered           | 2 VC_1394_0   | 2   | 1      | 1          | 1      | 0 | 0 | 0 | 1 Ref      |
| OM869633 | Unassigned | Unassigned | Unassigned | 1308_0 | Clustered           | 12 VC_1308_0  | 12  | 0.8184 | 0.9810731  | 0.8029 | 0 | 0 | 0 | 1 Ref      |
| OM869634 | Unassigned | Unassigned | Unassigned | 1145_0 | Clustered           | 5 VC_1145_0   | 5   | 0.8807 | 0.99921062 | 0.8801 | 0 | 0 | 0 | 1 Ref      |
| OM869635 | Unassigned | Unassigned | Unassigned | 1104_0 | Clustered           | 154 VC_1104_0 | 154 | 0.8484 | 1          | 0.8484 | 0 | 0 | 0 | 1 Ref      |
| OM869637 | Unassigned | Unassigned | Unassigned | 1145_0 | Clustered           | 5 VC_1145_0   | 5   | 0.8807 | 0.99921062 | 0.8801 | 0 | 0 | 0 | 1 Ref      |
| OM869638 | Unassigned | Unassigned | Unassigned | 1321_0 | Clustered           | 14 VC_1321_0  | 14  | 0.826  | 1          | 0.826  | 0 | 0 | 0 | 1 Ref      |
| OM869639 | Unassigned | Unassigned | Unassigned | 1332_0 | Clustered           | 2 VC_1332_0   | 2   | 0.4405 | 0.9197097  | 0.4052 | 0 | 0 | 0 | 1 Ref      |
| OM869640 | Unassigned | Unassigned | Unassigned | 1133_0 | Clustered           | 4 VC_1133_0   | 4   | 0.1253 | 0.975067   | 0.1222 | 0 | 0 | 0 | 1 Ref      |
| OM869641 | Unassigned | Unassigned | Unassigned | 1104_0 | Clustered           | 154 VC_1104_0 | 154 | 0.8484 | 1          | 0.8484 | 0 | 0 | 0 | 1 Ref      |
| OM869642 | Unassigned | Unassigned | Unassigned | 1104_0 | Clustered           | 154 VC_1104_0 | 154 | 0.8484 | 1          | 0.8484 | 0 | 0 | 0 | 1 Ref      |
| OM869643 | Unassigned | Unassigned | Unassigned | 1104_0 | Clustered           | 154 VC_1104_0 | 154 | 0.8484 | 1          | 0.8484 | 0 | 0 | 0 | 1 Ref      |
| OM869644 | Unassigned | Unassigned | Unassigned | 1104_0 | Clustered           | 154 VC_1104_0 | 154 | 0.8484 | 1          | 0.8484 | 0 | 0 | 0 | 1 Ref      |
| OM869645 | Unassigned | Unassigned | Unassigned | 1104_0 | Clustered           | 154 VC_1104_0 | 154 | 0.8484 | 1          | 0.8484 | 0 | 0 | 0 | 1 Ref      |
| OM869648 | Unassigned | Unassigned | Unassigned | 1313_0 | Clustered           | 13 VC_1313_0  | 13  | 0.8481 | 0.87456432 | 0.7417 | 0 | 0 | 0 | 1 Ref      |
| OM869650 | Unassigned | Unassigned | Unassigned | 1243_0 | Clustered           | 52 VC_1243_0  | 52  | 0.9126 | 0.92708311 | 0.8461 | 0 | 0 | 0 | 1 Ref      |
| OM869652 | Unassigned | Unassigned | Unassigned | 1313_0 | Clustered           | 13 VC_1313_0  | 13  | 0.8481 | 0.87456432 | 0.7417 | 0 | 0 | 0 | 1 Ref      |
| OM869653 | Unassigned | Unassigned | Unassigned | 1304_0 | Clustered           | 7 VC_1304_0   | 7   | 0.7931 | 0.9999998  | 0.7931 | 0 | 0 | 0 | 1 Ref      |
| OM869654 | Unassigned | Unassigned | Unassigned | 1313_0 | Clustered           | 13 VC_1313_0  | 13  | 0.8481 | 0.87456432 | 0.7417 | 0 | 0 | 0 | 1 Ref      |
| OM869655 | Unassigned | Unassigned | Unassigned | 1313_0 | Clustered           | 13 VC_1313_0  | 13  | 0.8481 | 0.87456432 | 0.7417 | 0 | 0 | 0 | 1 Ref      |
| OM869663 | Unassigned | Unassigned | Unassigned | 1125_0 | Clustered           | 20 VC_1125_0  | 20  | 0.5599 | 1          | 0.5599 | 0 | 0 | 0 | 1 Ref      |
| OM869664 | Unassigned | Unassigned | Unassigned | 1104_0 | Clustered           | 154 VC_1104_0 | 154 | 0.8484 | 1          | 0.8484 | 0 | 0 | 0 | 1 Ref      |
| OM869666 | Unassigned | Unassigned | Unassigned | 1313_0 | Clustered           | 13 VC_1313_0  | 13  | 0.8481 | 0.87456432 | 0.7417 | 0 | 0 | 0 | 1 Ref      |
| OM869668 | Unassigned | Unassigned | Unassigned | 1277_0 | Clustered           | 14 VC_1277_0  | 14  | 0.8218 | 1          | 0.8218 | 0 | 0 | 0 | 1 Ref      |
| OM869669 | Unassigned | Unassigned | Unassigned | 1462_0 | Clustered           | 4 VC_1462_0   | 4   | 1      | 1          | 1      | 0 | 0 | 0 | 1 Ref      |
| OM869672 | Unassigned | Unassigned | Unassigned | 1470_0 | Clustered           | 3 VC_1470_0   | 3   | 1      | 1          | 1      | 0 | 0 | 0 | 1 Ref      |
| OM869677 | Unassigned | Unassigned | Unassigned | 1154_0 | Clustered           | 5 VC_1154_0   | 5   | 1      | 1          | 1      | 0 | 0 | 0 | 1 Ref      |
| OM869679 | Unassigned | Unassigned | Unassigned | 1332_0 | Clustered           | 2 VC_1332_0   | 2   | 0.4405 | 0.9197097  | 0.4052 | 0 | 0 | 0 | 1 Ref      |
| OM869684 | Unassigned | Unassigned | Unassigned | 1313_0 | Clustered           | 13 VC_1313_0  | 13  | 0.8481 | 0.87456432 | 0.7417 | 0 | 0 | 0 | 1 Ref      |
| OM869688 | Unassigned | Unassigned | Unassigned | 1470_0 | Clustered           | 3 VC_1470_0   | 3   | 1      | 1          | 1      | 0 | 0 | 0 | 1 Ref      |
| OM869691 | Unassigned | Unassigned | Unassigned | 1308_0 | Clustered           | 12 VC_1308_0  | 12  | 0.8184 | 0.9810731  | 0.8029 | 0 | 0 | 0 | 1 Ref      |
| OM869696 | Unassigned | Unassigned | Unassigned | 1303_0 | Clustered           | 6 VC_1303_0   | 6   | 1      | 1          | 1      | 0 | 0 | 0 | 1 Ref      |
| OM869697 | Unassigned | Unassigned | Unassigned | 1104_0 | Clustered           | 154 VC_1104_0 | 154 | 0.8484 | 1          | 0.8484 | 0 | 0 | 0 | 1 Ref      |
| OM869698 | Unassigned | Unassigned | Unassigned | 1104_0 | Clustered           | 154 VC_1104_0 | 154 | 0.8484 | 1          | 0.8484 | 0 | 0 | 0 | 1 Ref      |
| OM869700 | Unassigned | Unassigned | Unassigned | 1104_0 | Clustered           | 154 VC_1104_0 | 154 | 0.8484 | 1          | 0.8484 | 0 | 0 | 0 | 1 Ref      |
| OM869701 | Unassigned | Unassigned | Unassigned | 1104_0 | Clustered           | 154 VC_1104_0 | 154 | 0.8484 | 1          | 0.8484 | 0 | 0 | 0 | 1 Ref      |
| OM869702 | Unassigned | Unassigned | Unassigned | 1058_0 | Clustered           | 2 VC_1058_0   | 2   | 0.5063 | 0.72985431 | 0.3695 | 0 | 0 | 0 | 1 Ref      |
| OM869703 | Unassigned | Unassigned | Unassigned | 1104_0 | Clustered           | 154 VC_1104_0 | 154 | 0.8484 | 1          | 0.8484 | 0 | 0 | 0 | 1 Ref      |
| OM869704 | Unassigned | Unassigned | Unassigned | 1104_0 | Clustered           | 154 VC_1104_0 | 154 | 0.8484 | 1          | 0.8484 | 0 | 0 | 0 | 1 Ref      |
| OM869706 | Unassigned | Unassigned | Unassigned | 1459_0 | Clustered           | 2 VC_1459_0   | 2   | 1      | 1          | 1      | 0 | 0 | 0 | 1 Ref      |
| OM869707 | Unassigned | Unassigned | Unassigned | 1321_0 | Clustered           | 14 VC_1321_0  | 14  | 0.826  | 1          | 0.826  | 0 | 0 | 0 | 1 Ref      |
| OM869708 | Unassigned | Unassigned | Unassigned | 1460_0 | Clustered           | 3 VC_1460_0   | 3   | 0.7846 | 0.96173875 | 0.7546 | 0 | 0 | 0 | 1 Ref      |
| OM869709 | Unassigned | Unassigned | Unassigned | 1197_0 | Clustered           | 15 VC_1197_0  | 15  | 0.8991 | 0.76608394 | 0.6888 | 0 | 0 | 0 | 1 Ref      |
| OM869711 | Unassigned | Unassigned | Unassigned | 1371_0 | Clustered           | 5 VC_1371_0   | 5   | 0.7004 | 0.52188382 | 0.3656 | 0 | 0 | 0 | 1 Ref      |
| OM869712 | Unassigned | Unassigned | Unassigned | 1462_0 | Clustered           | 4 VC_1462_0   | 4   | 1      | 1          | 1      | 0 | 0 | 0 | 1 Ref      |
| OM869713 | Unassigned | Unassigned | Unassigned | 1471_0 | Clustered           | 2 VC_1471_0   | 2   | 1      | 1          | 1      | 0 | 0 | 0 | 1 Ref      |
| OM892879 | Unassigned | Unassigned | Unassigned | 353_0  | Clustered           | 6 VC_353_0    | 6   | 0.545  | 1          | 0.545  | 0 | 0 | 0 | 1 Ref      |
| OM897575 | Unassigned | Unassigned | Unassigned | 778_0  | Clustered           | 4 VC_778_0    | 4   | 0.8115 | 0.99985435 | 0.8114 | 0 | 0 | 0 | 1 Ref      |
| OM908436 | Unassigned | Unassigned | Unassigned | 451_0  | Clustered           | 80 VC_451_0   | 80  | 0.9991 | 1          | 0.9991 | 0 | 0 | 0 | 1 Ref      |
| OM908766 | Unassigned | Unassigned | Unassigned | 780_0  | Clustered           | 8 VC_780_0    | 8   | 0.5207 | 1          | 0.5207 | 0 | 0 | 0 | 1 Ref      |
| OM913584 | Unassigned | Unassigned | Unassigned | 236_0  | Clustered           | 72 VC_236_0   | 72  | 0.8104 | 1          | 0.8104 | 0 | 0 | 0 | 1 Ref      |
| OM913585 | Unassigned | Unassigned | Unassigned | 223_0  | Clustered           | 38 VC_223_0   | 38  | 0.9095 | 1          | 0.9095 | 0 | 0 | 0 | 1 Ref      |
| OM913586 | Unassigned | Unassigned | Unassigned | 1044_0 | Clustered           | 3 VC_1044_0   | 3   | 0.0843 | 0.99852363 | 0.0842 | 0 | 0 | 0 | 1 Ref      |
| OM913587 | Unassigned | Unassigned | Unassigned | 1360_0 | Clustered           | 31 VC_1360_0  | 31  | 0.8837 | 1          | 0.8837 | 0 | 0 | 0 | 1 Ref      |
| OM913597 | Unassigned | Unassigned | Unassigned | 159_0  | Clustered           | 2 VC_159_0    | 2   | 0.1337 | 0.95628623 | 0.1279 | 0 | 0 | 0 | 1 Ref      |
| OM913598 | Unassigned | Unassigned | Unassigned | 159_0  | Clustered           | 2 VC_159_0    | 2   | 0.1337 | 0.95628623 | 0.1279 | 0 | 0 | 0 | 1 Ref      |
| OM913894 | Unassigned | Unassigned | Unassigned | 113_0  | Clustered           | 9 VC_113_0    | 9   | 0.519  | 1          | 0.519  | 0 | 0 | 0 | 1 Ref      |
| OM925528 | Unassigned | Unassigned | Unassigned | 699_0  | Clustered           | 71 VC_699_0   | 71  | 0.9352 | 1          | 0.9352 | 0 | 0 | 0 | 1 Ref      |
| OM937123 | Unassigned | Unassigned | Unassigned | 451_0  | Clustered           | 80 VC_451_0   | 80  | 0.9991 | 1          | 0.9991 | 0 | 0 | 0 | 1 Ref      |
| OM937766 | Unassigned | Unassigned | Unassigned | 838_0  | Clustered           | 29 VC_838_0   | 29  | 0.8611 | 1          | 0.8611 | 0 | 0 | 0 | 1 Ref      |
| OM938991 | Unassigned | Unassigned | Unassigned | 938_0  | Clustered           | 99 VC_938_0   | 99  | 0.9119 | 1          | 0.9119 | 0 | 0 | 0 | 0.9928 Ref |
| OM938992 | Unassigned | Unassigned | Unassigned | 938_0  | Clustered           | 99 VC_938_0   | 99  | 0.9119 | 1          | 0.9119 | 0 | 0 | 0 | 0.9928 Ref |
| OM953433 | Unassigned | Unassigned | Unassigned | 330_0  | Clustered           | 27 VC_330_0   | 27  | 0.5088 | 1          | 0.5088 | 0 | 0 | 0 | 0.8661 Ref |
| OM953790 | Unassigned | Unassigned | Unassigned | 79_0   | Clustered           | 64 VC_79_0    | 64  | 0.4185 | 1          | 0.4185 | 0 | 0 | 0 | 0.7649 Ref |
| OM960734 | Unassigned | Unassigned | Unassigned | 286_1  | Clustered           | 21 VC_286_1   | 21  | 0.1696 | 1          | 0.1696 | 0 | 0 | 0 | 0.9048 Ref |
| OM962992 | Unassigned | Unassigned | Unassigned | 591_0  | Clustered           | 14 VC_591_0   | 14  | 0.5184 | 1          | 0.5184 | 0 | 0 | 0 | 1 Ref      |
| OM964875 | Unassigned | Unassigned | Unassigned | 938_0  | Clustered           | 99 VC_938_0   | 99  | 0.9119 | 1          | 0.9119 | 0 | 0 | 0 | 0.9928 Ref |
| OM966901 | Unassigned | Unassigned | Unassigned | 92_0   | Clustered           | 22 VC_92_0    | 22  | 0.5639 | 1          | 0.5639 | 0 | 0 | 0 | 1 Ref      |
| OM971648 | Unassigned | Unassigned | Unassigned | 668_0  | Clustered           | 25 VC_668_0   | 25  | 0.5539 | 1          | 0.5539 | 0 | 0 | 0 | 0.96 Ref   |
| OM971649 | Unassigned | Unassigned | Unassigned | 668_0  | Clustered           | 25 VC_668_0   | 25  | 0.5539 | 1          | 0.5539 | 0 | 0 | 0 | 0.96 Ref   |
| OM982619 | Unassigned | Unassigned | Unassigned | 965_0  | Clustered           | 2 VC_965_0    | 2   | 0.2408 | 0.95689931 | 0.2304 | 0 | 0 | 0 | 1 Ref      |
| OM982620 | Unassigned | Unassigned | Unassigned | 78_5   | Clustered           | 6 VC_78_5     | 6   | 0.1087 | 0.99978082 | 0.1087 | 0 | 0 | 0 | 1 Ref      |
| OM982621 | Unassigned | Unassigned | Unassigned | 581_1  | Clustered/Singleton | 1 VC_581_1    | 1   | 0      | 1          | 0      | 0 | 0 | 0 | 1 Ref      |
| OM982646 | Unassigned | Unassigned | Unassigned | 779_0  | Clustered           | 37 VC_779_0   | 37  | 0.5682 | 1          | 0.5682 | 0 | 0 | 0 | 1 Ref      |
| OM982647 | Unassigned | Unassigned | Unassigned | 286_10 | Clustered           | 9 VC_286_10   | 9   | 0.0615 | 0.99999878 | 0.0615 | 0 | 0 | 0 | 0.6667 Ref |
| OM982668 | Unassigned | Unassigned | Unassigned | 85_3   | Clustered           | 19 VC_85_3    | 19  | 0.3671 | 1          | 0.3671 | 0 | 0 | 0 | 0.807 Ref  |
| OM982669 | Unassigned | Unassigned | Unassigned | 85_3   | Clustered           | 19 VC_85_3    | 19  | 0.3671 | 1          | 0.3671 | 0 | 0 | 0 | 0.807 Ref  |
| OM982670 | Unassigned | Unassigned | Unassigned | 85_3   | Clustered           | 19 VC_85_3    | 19  | 0.3671 | 1          | 0.3671 | 0 | 0 | 0 | 0.807 Ref  |



|          |            |            |            |        |                     |              |     |        |            |        |   |   |   |        |     |
|----------|------------|------------|------------|--------|---------------------|--------------|-----|--------|------------|--------|---|---|---|--------|-----|
| OM982671 | Unassigned | Unassigned | Unassigned | 85_3   | Clustered           | 19 VC_85_3   | 19  | 0.3671 | 1          | 0.3671 | 0 | 0 | 0 | 0.807  | Ref |
| OM982672 | Unassigned | Unassigned | Unassigned | 85_3   | Clustered           | 19 VC_85_3   | 19  | 0.3671 | 1          | 0.3671 | 0 | 0 | 0 | 0.807  | Ref |
| OM982673 | Unassigned | Unassigned | Unassigned | 85_3   | Clustered           | 19 VC_85_3   | 19  | 0.3671 | 1          | 0.3671 | 0 | 0 | 0 | 0.807  | Ref |
| OM982674 | Unassigned | Unassigned | Unassigned | 85_3   | Clustered           | 19 VC_85_3   | 19  | 0.3671 | 1          | 0.3671 | 0 | 0 | 0 | 0.807  | Ref |
| ON000910 | Unassigned | Unassigned | Unassigned | 531_0  | Clustered           | 9 VC_531_0   | 9   | 0.26   | 1          | 0.26   | 0 | 0 | 0 | 1      | Ref |
| ON001686 | Unassigned | Unassigned | Unassigned | 638_0  | Clustered           | 45 VC_638_0  | 45  | 0.7741 | 1          | 0.7741 | 0 | 0 | 0 | 1      | Ref |
| ON005621 | Unassigned | Unassigned | Unassigned | 169_0  | Clustered           | 20 VC_169_0  | 20  | 0.7529 | 1          | 0.7529 | 0 | 0 | 0 | 1      | Ref |
| ON014753 | Unassigned | Unassigned | Unassigned | 1472_0 | Clustered           | 2 VC_1472_0  | 2   | 1      | 1          | 1      | 0 | 0 | 0 | 1      | Ref |
| ON014754 | Unassigned | Unassigned | Unassigned | 1433_0 | Clustered           | 2 VC_1433_0  | 2   | 1      | 1          | 1      | 0 | 0 | 0 | 1      | Ref |
| ON014755 | Unassigned | Unassigned | Unassigned | 468_0  | Clustered           | 4 VC_468_0   | 4   | 0.143  | 0.99998478 | 0.143  | 0 | 0 | 0 | 1      | Ref |
| ON014757 | Unassigned | Unassigned | Unassigned | 1472_0 | Clustered           | 2 VC_1472_0  | 2   | 1      | 1          | 1      | 0 | 0 | 0 | 1      | Ref |
| ON015836 | Unassigned | Unassigned | Unassigned | 904_1  | Clustered           | 4 VC_904_1   | 4   | 0.1486 | 0.99997723 | 0.1486 | 0 | 0 | 0 | 1      | Ref |
| ON018986 | Unassigned | Unassigned | Unassigned | 247_0  | Clustered           | 14 VC_247_0  | 14  | 0.9119 | 1          | 0.9119 | 0 | 0 | 0 | 0.967  | Ref |
| ON036882 | Unassigned | Unassigned | Unassigned | 698_0  | Clustered           | 26 VC_698_0  | 26  | 0.9366 | 1          | 0.9366 | 0 | 0 | 0 | 1      | Ref |
| ON036883 | Unassigned | Unassigned | Unassigned | 698_0  | Clustered           | 26 VC_698_0  | 26  | 0.9366 | 1          | 0.9366 | 0 | 0 | 0 | 1      | Ref |
| ON042478 | Unassigned | Unassigned | Unassigned | 600_0  | Clustered           | 3 VC_600_0   | 3   | 0.0541 | 0.97110069 | 0.0526 | 0 | 0 | 0 | 1      | Ref |
| ON042750 | Unassigned | Unassigned | Unassigned | 817_0  | Clustered           | 14 VC_817_0  | 14  | 0.6342 | 1          | 0.6342 | 0 | 0 | 0 | 1      | Ref |
| ON045001 | Unassigned | Unassigned | Unassigned | 586_0  | Clustered           | 3 VC_586_0   | 3   | 0.0495 | 0.99859933 | 0.0495 | 0 | 0 | 0 | 1      | Ref |
| ON080940 | Unassigned | Unassigned | Unassigned | 837_0  | Clustered           | 29 VC_837_0  | 29  | 0.9955 | 1          | 0.9955 | 0 | 0 | 0 | 1      | Ref |
| ON080941 | Unassigned | Unassigned | Unassigned | 837_0  | Clustered           | 29 VC_837_0  | 29  | 0.9955 | 1          | 0.9955 | 0 | 0 | 0 | 1      | Ref |
| ON081052 | Unassigned | Unassigned | Unassigned | 456_0  | Clustered           | 62 VC_456_0  | 62  | 0.9026 | 1          | 0.9026 | 0 | 0 | 0 | 1      | Ref |
| ON081328 | Unassigned | Unassigned | Unassigned | 1360_0 | Clustered           | 31 VC_1360_0 | 31  | 0.8837 | 1          | 0.8837 | 0 | 0 | 0 | 1      | Ref |
| ON081329 | Unassigned | Unassigned | Unassigned | 236_0  | Clustered           | 72 VC_236_0  | 72  | 0.8104 | 1          | 0.8104 | 0 | 0 | 0 | 1      | Ref |
| ON081330 | Unassigned | Unassigned | Unassigned | 1352_0 | Clustered           | 31 VC_1352_0 | 31  | 0.849  | 1          | 0.849  | 0 | 0 | 0 | 1      | Ref |
| ON081331 | Unassigned | Unassigned | Unassigned | 236_0  | Clustered           | 72 VC_236_0  | 72  | 0.8104 | 1          | 0.8104 | 0 | 0 | 0 | 1      | Ref |
| ON081332 | Unassigned | Unassigned | Unassigned | 1093_0 | Clustered           | 40 VC_1093_0 | 40  | 0.8754 | 1          | 0.8754 | 0 | 0 | 0 | 1      | Ref |
| ON081333 | Unassigned | Unassigned | Unassigned | 510_0  | Clustered           | 12 VC_510_0  | 12  | 0.3963 | 1          | 0.3963 | 0 | 0 | 0 | 0.9697 | Ref |
| ON081334 | Unassigned | Unassigned | Unassigned | 1344_0 | Clustered           | 78 VC_1344_0 | 78  | 0.9732 | 1          | 0.9732 | 0 | 0 | 0 | 1      | Ref |
| ON081335 | Unassigned | Unassigned | Unassigned | 558_20 | Clustered           | 17 VC_558_20 | 17  | 0.054  | 1          | 0.054  | 0 | 0 | 0 | 0.9926 | Ref |
| ON086804 | Unassigned | Unassigned | Unassigned | 123_0  | Clustered           | 23 VC_123_0  | 23  | 0.817  | 1          | 0.817  | 0 | 0 | 0 | 1      | Ref |
| ON086985 | Unassigned | Unassigned | Unassigned | 108_0  | Clustered           | 33 VC_108_0  | 33  | 0.949  | 1          | 0.949  | 0 | 0 | 0 | 1      | Ref |
| ON107264 | Unassigned | Unassigned | Unassigned | 89_4   | Clustered/Singleton | 1 VC_89_4    | 1   | 0      | 1          | 0      | 0 | 0 | 0 | 1      | Ref |
| ON108640 | Unassigned | Unassigned | Unassigned | 221_0  | Clustered           | 22 VC_221_0  | 22  | 0.7447 | 1          | 0.7447 | 0 | 0 | 0 | 1      | Ref |
| ON108642 | Unassigned | Unassigned | Unassigned | 1344_0 | Clustered           | 78 VC_1344_0 | 78  | 0.9732 | 1          | 0.9732 | 0 | 0 | 0 | 1      | Ref |
| ON108643 | Unassigned | Unassigned | Unassigned | 573_0  | Clustered           | 2 VC_573_0   | 2   | 0.11   | 0.95639318 | 0.1052 | 0 | 0 | 0 | 1      | Ref |
| ON108644 | Unassigned | Unassigned | Unassigned | 510_0  | Clustered           | 12 VC_510_0  | 12  | 0.3963 | 1          | 0.3963 | 0 | 0 | 0 | 0.9697 | Ref |
| ON108645 | Unassigned | Unassigned | Unassigned | 574_0  | Clustered           | 7 VC_574_0   | 7   | 0.2734 | 1          | 0.2734 | 0 | 0 | 0 | 1      | Ref |
| ON108646 | Unassigned | Unassigned | Unassigned | 872_0  | Clustered           | 31 VC_872_0  | 31  | 0.8151 | 1          | 0.8151 | 0 | 0 | 0 | 0.8194 | Ref |
| ON108647 | Unassigned | Unassigned | Unassigned | 1224_0 | Clustered           | 19 VC_1224_0 | 19  | 1      | 1          | 1      | 0 | 0 | 0 | 1      | Ref |
| ON108648 | Unassigned | Unassigned | Unassigned | 1344_0 | Clustered           | 78 VC_1344_0 | 78  | 0.9732 | 1          | 0.9732 | 0 | 0 | 0 | 1      | Ref |
| ON108649 | Unassigned | Unassigned | Unassigned | 569_0  | Clustered           | 3 VC_569_0   | 3   | 0.2094 | 0.99849867 | 0.2091 | 0 | 0 | 0 | 1      | Ref |
| ON108650 | Unassigned | Unassigned | Unassigned | 1071_3 | Clustered           | 16 VC_1071_3 | 16  | 0.2354 | 1          | 0.2354 | 0 | 0 | 0 | 0.9667 | Ref |
| ON108651 | Unassigned | Unassigned | Unassigned | 685_0  | Clustered           | 16 VC_685_0  | 16  | 0.2972 | 1          | 0.2972 | 0 | 0 | 0 | 0.9167 | Ref |
| ON109291 | Unassigned | Unassigned | Unassigned | 130_0  | Clustered           | 19 VC_130_0  | 19  | 0.6068 | 1          | 0.6068 | 0 | 0 | 0 | 1      | Ref |
| ON113167 | Unassigned | Unassigned | Unassigned | 91_0   | Clustered           | 22 VC_91_0   | 22  | 0.5318 | 1          | 0.5318 | 0 | 0 | 0 | 1      | Ref |
| ON113168 | Unassigned | Unassigned | Unassigned | 91_0   | Clustered           | 22 VC_91_0   | 22  | 0.5318 | 1          | 0.5318 | 0 | 0 | 0 | 1      | Ref |
| ON113169 | Unassigned | Unassigned | Unassigned | 91_0   | Clustered           | 22 VC_91_0   | 22  | 0.5318 | 1          | 0.5318 | 0 | 0 | 0 | 1      | Ref |
| ON113170 | Unassigned | Unassigned | Unassigned | 92_0   | Clustered           | 22 VC_92_0   | 22  | 0.5639 | 1          | 0.5639 | 0 | 0 | 0 | 1      | Ref |
| ON113171 | Unassigned | Unassigned | Unassigned | 108_0  | Clustered           | 33 VC_108_0  | 33  | 0.949  | 1          | 0.949  | 0 | 0 | 0 | 1      | Ref |
| ON113172 | Unassigned | Unassigned | Unassigned | 108_0  | Clustered           | 33 VC_108_0  | 33  | 0.949  | 1          | 0.949  | 0 | 0 | 0 | 1      | Ref |
| ON113173 | Unassigned | Unassigned | Unassigned | 108_0  | Clustered           | 33 VC_108_0  | 33  | 0.949  | 1          | 0.949  | 0 | 0 | 0 | 1      | Ref |
| ON113174 | Unassigned | Unassigned | Unassigned | 108_0  | Clustered           | 33 VC_108_0  | 33  | 0.949  | 1          | 0.949  | 0 | 0 | 0 | 1      | Ref |
| ON113175 | Unassigned | Unassigned | Unassigned | 108_0  | Clustered           | 33 VC_108_0  | 33  | 0.949  | 1          | 0.949  | 0 | 0 | 0 | 1      | Ref |
| ON113176 | Unassigned | Unassigned | Unassigned | 695_0  | Clustered           | 48 VC_695_0  | 48  | 0.8162 | 1          | 0.8162 | 0 | 0 | 0 | 1      | Ref |
| ON113177 | Unassigned | Unassigned | Unassigned | 108_0  | Clustered           | 33 VC_108_0  | 33  | 0.949  | 1          | 0.949  | 0 | 0 | 0 | 1      | Ref |
| ON113178 | Unassigned | Unassigned | Unassigned | 108_0  | Clustered           | 33 VC_108_0  | 33  | 0.949  | 1          | 0.949  | 0 | 0 | 0 | 1      | Ref |
| ON113179 | Unassigned | Unassigned | Unassigned | 108_0  | Clustered           | 33 VC_108_0  | 33  | 0.949  | 1          | 0.949  | 0 | 0 | 0 | 1      | Ref |
| ON113180 | Unassigned | Unassigned | Unassigned | 108_0  | Clustered           | 33 VC_108_0  | 33  | 0.949  | 1          | 0.949  | 0 | 0 | 0 | 1      | Ref |
| ON113181 | Unassigned | Unassigned | Unassigned | 968_0  | Clustered           | 4 VC_968_0   | 4   | 0.2959 | 0.99997642 | 0.2959 | 0 | 0 | 0 | 1      | Ref |
| ON113334 | Unassigned | Unassigned | Unassigned | 695_0  | Clustered           | 48 VC_695_0  | 48  | 0.8162 | 1          | 0.8162 | 0 | 0 | 0 | 1      | Ref |
| ON113344 | Unassigned | Unassigned | Unassigned | 149_1  | Clustered           | 3 VC_149_1   | 3   | 0.0128 | 0.99303953 | 0.0127 | 0 | 0 | 0 | 1      | Ref |
| ON117106 | Unassigned | Unassigned | Unassigned | 634_1  | Clustered           | 6 VC_634_1   | 6   | 0.4228 | 1          | 0.4228 | 0 | 0 | 0 | 1      | Ref |
| ON125307 | Unassigned | Unassigned | Unassigned | 92_0   | Clustered           | 22 VC_92_0   | 22  | 0.5639 | 1          | 0.5639 | 0 | 0 | 0 | 1      | Ref |
| ON132389 | Unassigned | Unassigned | Unassigned | 111_0  | Clustered           | 91 VC_111_0  | 91  | 0.9587 | 1          | 0.9587 | 0 | 0 | 0 | 1      | Ref |
| ON133270 | Unassigned | Unassigned | Unassigned | 475_0  | Clustered           | 3 VC_475_0   | 3   | 0.0778 | 0.99798375 | 0.0776 | 0 | 0 | 0 | 1      | Ref |
| ON135435 | Unassigned | Unassigned | Unassigned | 3_0    | Clustered           | 17 VC_3_0    | 17  | 0.5639 | 1          | 0.5639 | 0 | 0 | 0 | 1      | Ref |
| ON146439 | Unassigned | Unassigned | Unassigned | 228_0  | Clustered           | 60 VC_228_0  | 60  | 0.942  | 1          | 0.942  | 0 | 0 | 0 | 1      | Ref |
| ON146440 | Unassigned | Unassigned | Unassigned | 228_0  | Clustered           | 60 VC_228_0  | 60  | 0.942  | 1          | 0.942  | 0 | 0 | 0 | 1      | Ref |
| ON146449 | Unassigned | Unassigned | Unassigned | 111_0  | Clustered           | 91 VC_111_0  | 91  | 0.9587 | 1          | 0.9587 | 0 | 0 | 0 | 1      | Ref |
| ON148527 | Unassigned | Unassigned | Unassigned | 452_0  | Clustered           | 66 VC_452_0  | 66  | 0.9248 | 1          | 0.9248 | 0 | 0 | 0 | 1      | Ref |
| ON148528 | Unassigned | Unassigned | Unassigned | 823_0  | Clustered           | 124 VC_823_0 | 124 | 0.9492 | 1          | 0.9492 | 0 | 0 | 0 | 1      | Ref |
| ON148529 | Unassigned | Unassigned | Unassigned | 823_0  | Clustered           | 124 VC_823_0 | 124 | 0.9492 | 1          | 0.9492 | 0 | 0 | 0 | 1      | Ref |
| ON156559 | Unassigned | Unassigned | Unassigned | 472_0  | Clustered           | 47 VC_472_0  | 47  | 0.9025 | 1          | 0.9025 | 0 | 0 | 0 | 1      | Ref |
| ON157416 | Unassigned | Unassigned | Unassigned | 669_0  | Clustered           | 21 VC_669_0  | 21  | 0.3623 | 1          | 0.3623 | 0 | 0 | 0 | 1      | Ref |
| ON165415 | Unassigned | Unassigned | Unassigned | 111_0  | Clustered           | 91 VC_111_0  | 91  | 0.9587 | 1          | 0.9587 | 0 | 0 | 0 | 1      | Ref |
| ON165687 | Unassigned | Unassigned | Unassigned | 166_0  | Clustered           | 26 VC_166_0  | 26  | 0.7923 | 1          | 0.7923 | 0 | 0 | 0 | 1      | Ref |
| ON167532 | Unassigned | Unassigned | Unassigned | 637_0  | Clustered           | 115 VC_637_0 | 115 | 0.731  | 1          | 0.731  | 0 | 0 | 0 | 0.8764 | Ref |
| ON169961 | Unassigned | Unassigned | Unassigned | 133_50 | Clustered/Singleton | 1 VC_133_50  | 1   | 0      | 1          | 0      | 0 | 0 | 0 | 1      | Ref |
| ON169962 | Unassigned | Unassigned | Unassigned | 133_51 | Clustered/Singleton | 1 VC_133_51  | 1   | 0      | 1          | 0      | 0 | 0 | 0 | 1      | Ref |
| ON169963 | Unassigned | Unassigned | Unassigned | 133_49 | Clustered/Singleton | 1 VC_133_49  | 1   | 0      | 1          | 0      | 0 | 0 | 0 | 1      | Ref |
| ON169972 | Unassigned | Unassigned | Unassigned | 76_0   | Clustered           | 37 VC_76_0   | 37  | 0.9403 | 1          | 0.9403 | 0 | 0 | 0 | 1      | Ref |



|           |            |            |            |       |           |             |    |        |            |        |   |   |   |       |
|-----------|------------|------------|------------|-------|-----------|-------------|----|--------|------------|--------|---|---|---|-------|
| QNT17001  | Unassigned | Unassigned | Unassigned | 25_0  | Clustered | 12 VC_25_0  | 12 | 0.7945 | 1          | 0.7945 | 0 | 0 | 0 | 1 Ref |
| QNT170019 | Unassigned | Unassigned | Unassigned | 826_0 | Clustered | 91 VC_826_0 | 91 | 0.9935 | 1          | 0.9935 | 0 | 0 | 0 | 1 Ref |
| QNT170020 | Unassigned | Unassigned | Unassigned | 52_0  | Clustered | 87 VC_52_0  | 87 | 0.9858 | 1          | 0.9858 | 0 | 0 | 0 | 1 Ref |
| QNT170022 | Unassigned | Unassigned | Unassigned | 826_0 | Clustered | 91 VC_826_0 | 91 | 0.9935 | 1          | 0.9935 | 0 | 0 | 0 | 1 Ref |
| QNT170023 | Unassigned | Unassigned | Unassigned | 52_0  | Clustered | 87 VC_52_0  | 87 | 0.9858 | 1          | 0.9858 | 0 | 0 | 0 | 1 Ref |
| QNT170024 | Unassigned | Unassigned | Unassigned | 357_0 | Clustered | 53 VC_357_0 | 53 | 0.8979 | 1          | 0.8979 | 0 | 0 | 0 | 1 Ref |
| QNT170025 | Unassigned | Unassigned | Unassigned | 53_0  | Clustered | 5 VC_53_0   | 5  | 0.4977 | 0.99999808 | 0.4977 | 0 | 0 | 0 | 1 Ref |
| QNT170026 | Unassigned | Unassigned | Unassigned | 1_0   | Clustered | 54 VC_1_0   | 54 | 0.8527 | 1          | 0.8527 | 0 | 0 | 0 | 1 Ref |
| QNT170027 | Unassigned | Unassigned | Unassigned | 357_0 | Clustered | 53 VC_357_0 | 53 | 0.8979 | 1          | 0.8979 | 0 | 0 | 0 | 1 Ref |
| QNT170028 | Unassigned | Unassigned | Unassigned | 826_0 | Clustered | 91 VC_826_0 | 91 | 0.9935 | 1          | 0.9935 | 0 | 0 | 0 | 1 Ref |
| QNT170029 | Unassigned | Unassigned | Unassigned | 52_0  | Clustered | 87 VC_52_0  | 87 | 0.9858 | 1          | 0.9858 | 0 | 0 | 0 | 1 Ref |
| QNT170030 | Unassigned | Unassigned | Unassigned | 52_0  | Clustered | 87 VC_52_0  | 87 | 0.9858 | 1          | 0.9858 | 0 | 0 | 0 | 1 Ref |
| QNT170031 | Unassigned | Unassigned | Unassigned | 357_0 | Clustered | 53 VC_357_0 | 53 | 0.8979 | 1          | 0.8979 | 0 | 0 | 0 | 1 Ref |
| QNT170032 | Unassigned | Unassigned | Unassigned | 1_0   | Clustered | 54 VC_1_0   | 54 | 0.8527 | 1          | 0.8527 | 0 | 0 | 0 | 1 Ref |
| QNT170033 | Unassigned | Unassigned | Unassigned | 826_0 | Clustered | 91 VC_826_0 | 91 | 0.9935 | 1          | 0.9935 | 0 | 0 | 0 | 1 Ref |
| QNT170034 | Unassigned | Unassigned | Unassigned | 52_0  | Clustered | 87 VC_52_0  | 87 | 0.9858 | 1          | 0.9858 | 0 | 0 | 0 | 1 Ref |
| QNT170036 | Unassigned | Unassigned | Unassigned | 826_0 | Clustered | 91 VC_826_0 | 91 | 0.9935 | 1          | 0.9935 | 0 | 0 | 0 | 1 Ref |
| QNT170037 | Unassigned | Unassigned | Unassigned | 52_0  | Clustered | 87 VC_52_0  | 87 | 0.9858 | 1          | 0.9858 | 0 | 0 | 0 | 1 Ref |
| QNT170038 | Unassigned | Unassigned | Unassigned | 826_0 | Clustered | 91 VC_826_0 | 91 | 0.9935 | 1          | 0.9935 | 0 | 0 | 0 | 1 Ref |
| QNT170040 | Unassigned | Unassigned | Unassigned | 826_0 | Clustered | 91 VC_826_0 | 91 | 0.9935 | 1          | 0.9935 | 0 | 0 | 0 | 1 Ref |
| QNT170041 | Unassigned | Unassigned | Unassigned | 52_0  | Clustered | 87 VC_52_0  | 87 | 0.9858 | 1          | 0.9858 | 0 | 0 | 0 | 1 Ref |
| QNT170042 | Unassigned | Unassigned | Unassigned | 25_0  | Clustered | 12 VC_25_0  | 12 | 0.7945 | 1          | 0.7945 | 0 | 0 | 0 | 1 Ref |
| QNT170049 | Unassigned | Unassigned | Unassigned | 826_0 | Clustered | 91 VC_826_0 | 91 | 0.9935 | 1          | 0.9935 | 0 | 0 | 0 | 1 Ref |
| QNT170050 | Unassigned | Unassigned | Unassigned | 52_0  | Clustered | 87 VC_52_0  | 87 | 0.9858 | 1          | 0.9858 | 0 | 0 | 0 | 1 Ref |
| QNT170051 | Unassigned | Unassigned | Unassigned | 25_0  | Clustered | 12 VC_25_0  | 12 | 0.7945 | 1          | 0.7945 | 0 | 0 | 0 | 1 Ref |
| QNT170052 | Unassigned | Unassigned | Unassigned | 357_0 | Clustered | 53 VC_357_0 | 53 | 0.8979 | 1          | 0.8979 | 0 | 0 | 0 | 1 Ref |
| QNT170053 | Unassigned | Unassigned | Unassigned | 1_0   | Clustered | 54 VC_1_0   | 54 | 0.8527 | 1          | 0.8527 | 0 | 0 | 0 | 1 Ref |
| QNT170054 | Unassigned | Unassigned | Unassigned | 826_0 | Clustered | 91 VC_826_0 | 91 | 0.9935 | 1          | 0.9935 | 0 | 0 | 0 | 1 Ref |
| QNT170055 | Unassigned | Unassigned | Unassigned | 52_0  | Clustered | 87 VC_52_0  | 87 | 0.9858 | 1          | 0.9858 | 0 | 0 | 0 | 1 Ref |
| QNT170056 | Unassigned | Unassigned | Unassigned | 25_0  | Clustered | 12 VC_25_0  | 12 | 0.7945 | 1          | 0.7945 | 0 | 0 | 0 | 1 Ref |
| QNT170057 | Unassigned | Unassigned | Unassigned | 357_0 | Clustered | 53 VC_357_0 | 53 | 0.8979 | 1          | 0.8979 | 0 | 0 | 0 | 1 Ref |
| QNT170058 | Unassigned | Unassigned | Unassigned | 357_0 | Clustered | 53 VC_357_0 | 53 | 0.8979 | 1          | 0.8979 | 0 | 0 | 0 | 1 Ref |



|          |            |            |            |       |           |             |    |        |            |        |   |   |   |            |
|----------|------------|------------|------------|-------|-----------|-------------|----|--------|------------|--------|---|---|---|------------|
| ONI70114 | Unassigned | Unassigned | Unassigned | 826_0 | Clustered | 91 VC_826_0 | 91 | 0.9935 | 1          | 0.9935 | 0 | 0 | 0 | 1 Ref      |
| ONI70115 | Unassigned | Unassigned | Unassigned | 52_0  | Clustered | 87 VC_52_0  | 87 | 0.9858 | 1          | 0.9858 | 0 | 0 | 0 | 1 Ref      |
| ONI70116 | Unassigned | Unassigned | Unassigned | 826_0 | Clustered | 91 VC_826_0 | 91 | 0.9935 | 1          | 0.9935 | 0 | 0 | 0 | 1 Ref      |
| ONI70117 | Unassigned | Unassigned | Unassigned | 52_0  | Clustered | 87 VC_52_0  | 87 | 0.9858 | 1          | 0.9858 | 0 | 0 | 0 | 1 Ref      |
| ONI70118 | Unassigned | Unassigned | Unassigned | 826_0 | Clustered | 91 VC_826_0 | 91 | 0.9935 | 1          | 0.9935 | 0 | 0 | 0 | 1 Ref      |
| ONI70119 | Unassigned | Unassigned | Unassigned | 52_0  | Clustered | 87 VC_52_0  | 87 | 0.9858 | 1          | 0.9858 | 0 | 0 | 0 | 1 Ref      |
| ONI70120 | Unassigned | Unassigned | Unassigned | 826_0 | Clustered | 91 VC_826_0 | 91 | 0.9935 | 1          | 0.9935 | 0 | 0 | 0 | 1 Ref      |
| ONI70121 | Unassigned | Unassigned | Unassigned | 52_0  | Clustered | 87 VC_52_0  | 87 | 0.9858 | 1          | 0.9858 | 0 | 0 | 0 | 1 Ref      |
| ONI70122 | Unassigned | Unassigned | Unassigned | 826_0 | Clustered | 91 VC_826_0 | 91 | 0.9935 | 1          | 0.9935 | 0 | 0 | 0 | 1 Ref      |
| ONI70124 | Unassigned | Unassigned | Unassigned | 826_0 | Clustered | 91 VC_826_0 | 91 | 0.9935 | 1          | 0.9935 | 0 | 0 | 0 | 1 Ref      |
| ONI70125 | Unassigned | Unassigned | Unassigned | 52_0  | Clustered | 87 VC_52_0  | 87 | 0.9858 | 1          | 0.9858 | 0 | 0 | 0 | 1 Ref      |
| ONI70126 | Unassigned | Unassigned | Unassigned | 826_0 | Clustered | 91 VC_826_0 | 91 | 0.9935 | 1          | 0.9935 | 0 | 0 | 0 | 1 Ref      |
| ONI70127 | Unassigned | Unassigned | Unassigned | 52_0  | Clustered | 87 VC_52_0  | 87 | 0.9858 | 1          | 0.9858 | 0 | 0 | 0 | 1 Ref      |
| ONI70128 | Unassigned | Unassigned | Unassigned | 1_0   | Clustered | 54 VC_1_0   | 54 | 0.8527 | 1          | 0.8527 | 0 | 0 | 0 | 1 Ref      |
| ONI70129 | Unassigned | Unassigned | Unassigned | 357_0 | Clustered | 53 VC_357_0 | 53 | 0.8979 | 1          | 0.8979 | 0 | 0 | 0 | 1 Ref      |
| ONI70130 | Unassigned | Unassigned | Unassigned | 1_0   | Clustered | 54 VC_1_0   | 54 | 0.8527 | 1          | 0.8527 | 0 | 0 | 0 | 1 Ref      |
| ONI70131 | Unassigned | Unassigned | Unassigned | 1_0   | Clustered | 54 VC_1_0   | 54 | 0.8527 | 1          | 0.8527 | 0 | 0 | 0 | 1 Ref      |
| ONI70132 | Unassigned | Unassigned | Unassigned | 52_0  | Clustered | 87 VC_52_0  | 87 | 0.9858 | 1          | 0.9858 | 0 | 0 | 0 | 1 Ref      |
| ONI70133 | Unassigned | Unassigned | Unassigned | 357_0 | Clustered | 53 VC_357_0 | 53 | 0.8979 | 1          | 0.8979 | 0 | 0 | 0 | 1 Ref      |
| ONI70134 | Unassigned | Unassigned | Unassigned | 357_0 | Clustered | 53 VC_357_0 | 53 | 0.8979 | 1          | 0.8979 | 0 | 0 | 0 | 1 Ref      |
| ONI70135 | Unassigned | Unassigned | Unassigned | 1_0   | Clustered | 54 VC_1_0   | 54 | 0.8527 | 1          | 0.8527 | 0 | 0 | 0 | 1 Ref      |
| ONI70136 | Unassigned | Unassigned | Unassigned | 357_0 | Clustered | 53 VC_357_0 | 53 | 0.8979 | 1          | 0.8979 | 0 | 0 | 0 | 1 Ref      |
| ONI70139 | Unassigned | Unassigned | Unassigned | 53_0  | Clustered | 5 VC_53_0   | 5  | 0.4977 | 0.99999808 | 0.4977 | 0 | 0 | 0 | 1 Ref      |
| ONI70142 | Unassigned | Unassigned | Unassigned | 826_0 | Clustered | 91 VC_826_0 | 91 | 0.9935 | 1          | 0.9935 | 0 | 0 | 0 | 1 Ref      |
| ONI70143 | Unassigned | Unassigned | Unassigned | 52_0  | Clustered | 87 VC_52_0  | 87 | 0.9858 | 1          | 0.9858 | 0 | 0 | 0 | 1 Ref      |
| ONI70144 | Unassigned | Unassigned | Unassigned | 826_0 | Clustered | 91 VC_826_0 | 91 | 0.9935 | 1          | 0.9935 | 0 | 0 | 0 | 1 Ref      |
| ONI70145 | Unassigned | Unassigned | Unassigned | 52_0  | Clustered | 87 VC_52_0  | 87 | 0.9858 | 1          | 0.9858 | 0 | 0 | 0 | 1 Ref      |
| ONI70146 | Unassigned | Unassigned | Unassigned | 826_0 | Clustered | 91 VC_826_0 | 91 | 0.9935 | 1          | 0.9935 | 0 | 0 | 0 | 1 Ref      |
| ONI70147 | Unassigned | Unassigned | Unassigned | 52_0  | Clustered | 87 VC_52_0  | 87 | 0.9858 | 1          | 0.9858 | 0 | 0 | 0 | 1 Ref      |
| ONI70148 | Unassigned | Unassigned | Unassigned | 180_0 | Clustered | 4 VC_180_0  | 4  | 0.2056 | 0.9999862  | 0.2056 | 0 | 0 | 0 | 1 Ref      |
| ONI70149 | Unassigned | Unassigned | Unassigned | 358_0 | Clustered | 3 VC_358_0  | 3  | 0.5146 | 0.97657291 | 0.5026 | 0 | 0 | 0 | 1 Ref      |
| ONI70150 | Unassigned | Unassigned | Unassigned | 357_0 | Clustered | 53 VC_357_0 | 53 | 0.8979 | 1          | 0.8979 | 0 | 0 | 0 | 1 Ref      |
| ONI70151 | Unassigned | Unassigned | Unassigned | 1_0   | Clustered | 54 VC_1_0   | 54 | 0.8527 | 1          | 0.8527 | 0 | 0 | 0 | 1 Ref      |
| ONI70152 | Unassigned | Unassigned | Unassigned | 826_0 | Clustered | 91 VC_826_0 | 91 | 0.9935 | 1          | 0.9935 | 0 | 0 | 0 | 1 Ref      |
| ONI70153 | Unassigned | Unassigned | Unassigned | 52_0  | Clustered | 87 VC_52_0  | 87 | 0.9858 | 1          | 0.9858 | 0 | 0 | 0 | 1 Ref      |
| ONI70154 | Unassigned | Unassigned | Unassigned | 826_0 | Clustered | 91 VC_826_0 | 91 | 0.9935 | 1          | 0.9935 | 0 | 0 | 0 | 1 Ref      |
| ONI70155 | Unassigned | Unassigned | Unassigned | 52_0  | Clustered | 87 VC_52_0  | 87 | 0.9858 | 1          | 0.9858 | 0 | 0 | 0 | 1 Ref      |
| ONI70156 | Unassigned | Unassigned | Unassigned | 826_0 | Clustered | 91 VC_826_0 | 91 | 0.9935 | 1          | 0.9935 | 0 | 0 | 0 | 1 Ref      |
| ONI70157 | Unassigned | Unassigned | Unassigned | 52_0  | Clustered | 87 VC_52_0  | 87 | 0.9858 | 1          | 0.9858 | 0 | 0 | 0 | 1 Ref      |
| ONI70158 | Unassigned | Unassigned | Unassigned | 826_0 | Clustered | 91 VC_826_0 | 91 | 0.9935 | 1          | 0.9935 | 0 | 0 | 0 | 1 Ref      |
| ONI70159 | Unassigned | Unassigned | Unassigned | 52_0  | Clustered | 87 VC_52_0  | 87 | 0.9858 | 1          | 0.9858 | 0 | 0 | 0 | 1 Ref      |
| ONI70160 | Unassigned | Unassigned | Unassigned | 826_0 | Clustered | 91 VC_826_0 | 91 | 0.9935 | 1          | 0.9935 | 0 | 0 | 0 | 1 Ref      |
| ONI70161 | Unassigned | Unassigned | Unassigned | 52_0  | Clustered | 87 VC_52_0  | 87 | 0.9858 | 1          | 0.9858 | 0 | 0 | 0 | 1 Ref      |
| ONI70162 | Unassigned | Unassigned | Unassigned | 826_0 | Clustered | 91 VC_826_0 | 91 | 0.9935 | 1          | 0.9935 | 0 | 0 | 0 | 1 Ref      |
| ONI70163 | Unassigned | Unassigned | Unassigned | 52_0  | Clustered | 87 VC_52_0  | 87 | 0.9858 | 1          | 0.9858 | 0 | 0 | 0 | 1 Ref      |
| ONI70164 | Unassigned | Unassigned | Unassigned | 826_0 | Clustered | 91 VC_826_0 | 91 | 0.9935 | 1          | 0.9935 | 0 | 0 | 0 | 1 Ref      |
| ONI70165 | Unassigned | Unassigned | Unassigned | 52_0  | Clustered | 87 VC_52_0  | 87 | 0.9858 | 1          | 0.9858 | 0 | 0 | 0 | 1 Ref      |
| ONI70166 | Unassigned | Unassigned | Unassigned | 25_0  | Clustered | 12 VC_25_0  | 12 | 0.7945 | 1          | 0.7945 | 0 | 0 | 0 | 1 Ref      |
| ONI70167 | Unassigned | Unassigned | Unassigned | 826_0 | Clustered | 91 VC_826_0 | 91 | 0.9935 | 1          | 0.9935 | 0 | 0 | 0 | 1 Ref      |
| ONI70168 | Unassigned | Unassigned | Unassigned | 52_0  | Clustered | 87 VC_52_0  | 87 | 0.9858 | 1          | 0.9858 | 0 | 0 | 0 | 1 Ref      |
| ONI70169 | Unassigned | Unassigned | Unassigned | 25_0  | Clustered | 12 VC_25_0  | 12 | 0.7945 | 1          | 0.7945 | 0 | 0 | 0 | 1 Ref      |
| ONI70170 | Unassigned | Unassigned | Unassigned | 180_0 | Clustered | 4 VC_180_0  | 4  | 0.2056 | 0.9999862  | 0.2056 | 0 | 0 | 0 | 1 Ref      |
| ONI70171 | Unassigned | Unassigned | Unassigned | 358_0 | Clustered | 3 VC_358_0  | 3  | 0.5146 | 0.97657291 | 0.5026 | 0 | 0 | 0 | 1 Ref      |
| ONI70172 | Unassigned | Unassigned | Unassigned | 357_0 | Clustered | 53 VC_357_0 | 53 | 0.8979 | 1          | 0.8979 | 0 | 0 | 0 | 1 Ref      |
| ONI70173 | Unassigned | Unassigned | Unassigned | 1_0   | Clustered | 54 VC_1_0   | 54 | 0.8527 | 1          | 0.8527 | 0 | 0 | 0 | 1 Ref      |
| ONI70174 | Unassigned | Unassigned | Unassigned | 70_0  | Clustered | 27 VC_70_0  | 27 | 0.5981 | 1          | 0.5981 | 0 | 0 | 0 | 0.9886 Ref |
| ONI70175 | Unassigned | Unassigned | Unassigned | 357_0 | Clustered | 53 VC_357_0 | 53 | 0.8979 | 1          | 0.8979 | 0 | 0 | 0 | 1 Ref      |
| ONI70176 | Unassigned | Unassigned | Unassigned | 826_0 | Clustered | 91 VC_826_0 | 91 | 0.9935 | 1          | 0.9935 | 0 | 0 | 0 | 1 Ref      |
| ONI70178 | Unassigned | Unassigned | Unassigned | 70_0  | Clustered | 27 VC_70_0  | 27 | 0.5981 | 1          | 0.5981 | 0 | 0 | 0 | 0.9886 Ref |
| ONI70179 | Unassigned | Unassigned | Unassigned | 357_0 | Clustered | 53 VC_357_0 | 53 | 0.8979 | 1          | 0.8979 | 0 | 0 | 0 | 1 Ref      |
| ONI70180 | Unassigned | Unassigned | Unassigned | 826_0 | Clustered | 91 VC_826_0 | 91 | 0.9935 | 1          | 0.9935 | 0 | 0 | 0 | 1 Ref      |
| ONI70181 | Unassigned | Unassigned | Unassigned | 357_0 | Clustered | 53 VC_357_0 | 53 | 0.8979 | 1          | 0.8979 | 0 | 0 | 0 | 1 Ref      |
| ONI70182 | Unassigned | Unassigned | Unassigned | 357_0 | Clustered | 53 VC_357_0 | 53 | 0.8979 | 1          | 0.8979 | 0 | 0 | 0 | 1 Ref      |
| ONI70184 | Unassigned | Unassigned | Unassigned | 70_0  | Clustered | 27 VC_70_0  | 27 | 0.5981 | 1          | 0.5981 | 0 | 0 | 0 | 0.9886 Ref |
| ONI70185 | Unassigned | Unassigned | Unassigned | 357_0 | Clustered | 53 VC_357_0 | 53 | 0.8979 | 1          | 0.8979 | 0 | 0 | 0 | 1 Ref      |
| ONI70186 | Unassigned | Unassigned | Unassigned | 826_0 | Clustered | 91 VC_826_0 | 91 | 0.9935 | 1          | 0.9935 | 0 | 0 | 0 | 1 Ref      |
| ONI70187 | Unassigned | Unassigned | Unassigned | 357_0 | Clustered | 53 VC_357_0 | 53 | 0.8979 | 1          | 0.8979 | 0 | 0 | 0 | 1 Ref      |
| ONI70188 | Unassigned | Unassigned | Unassigned | 250_0 | Clustered | 4 VC_250_0  | 4  | 0.2395 | 0.99998241 | 0.2395 | 0 | 0 | 0 | 1 Ref      |
| ONI70189 | Unassigned | Unassigned | Unassigned | 826_0 | Clustered | 91 VC_826_0 | 91 | 0.9935 | 1          | 0.9935 | 0 | 0 | 0 | 1 Ref      |
| ONI70190 | Unassigned | Unassigned | Unassigned | 70_0  | Clustered | 27 VC_70_0  | 27 | 0.5981 | 1          | 0.5981 | 0 | 0 | 0 | 0.9886 Ref |
| ONI70192 | Unassigned | Unassigned | Unassigned | 826_0 | Clustered | 91 VC_826_0 | 91 | 0.9935 | 1          | 0.9935 | 0 | 0 | 0 | 1 Ref      |
| ONI70193 | Unassigned | Unassigned | Unassigned | 52_0  | Clustered | 87 VC_52_0  | 87 | 0.9858 | 1          | 0.9858 | 0 | 0 | 0 | 1 Ref      |
| ONI70194 | Unassigned | Unassigned | Unassigned | 826_0 | Clustered | 91 VC_826_0 | 91 | 0.9935 | 1          | 0.9935 | 0 | 0 | 0 | 1 Ref      |
| ONI70195 | Unassigned | Unassigned | Unassigned | 52_0  | Clustered | 87 VC_52_0  | 87 | 0.9858 | 1          | 0.9858 | 0 | 0 | 0 | 1 Ref      |
| ONI70196 | Unassigned | Unassigned | Unassigned | 826_0 | Clustered | 91 VC_826_0 | 91 | 0.9935 | 1          | 0.9935 | 0 | 0 | 0 | 1 Ref      |
| ONI70197 | Unassigned | Unassigned | Unassigned | 52_0  | Clustered | 87 VC_52_0  | 87 | 0.9858 | 1          | 0.9858 | 0 | 0 | 0 | 1 Ref      |
| ONI70198 | Unassigned | Unassigned | Unassigned | 826_0 | Clustered | 91 VC_826_0 | 91 | 0.9935 | 1          | 0.9935 | 0 | 0 | 0 | 1 Ref      |
| ONI70199 | Unassigned | Unassigned | Unassigned | 52_0  | Clustered | 87 VC_52_0  | 87 | 0.9858 | 1          | 0.9858 | 0 | 0 | 0 | 1 Ref      |
| ONI70200 | Unassigned | Unassigned | Unassigned | 826_0 | Clustered | 91 VC_826_0 | 91 | 0.9935 | 1          | 0.9935 | 0 | 0 | 0 | 1 Ref      |
| ONI70201 | Unassigned | Unassigned | Unassigned | 52_0  | Clustered | 87 VC_52_0  | 87 | 0.9858 | 1          | 0.9858 | 0 | 0 | 0 | 1 Ref      |
| ONI70202 | Unassigned | Unassigned | Unassigned | 826_0 | Clustered | 91 VC_826_0 | 91 | 0.9935 | 1          | 0.9935 | 0 | 0 | 0 | 1 Ref      |



|          |            |            |            |       |           |             |    |        |           |  |        |   |   |   |   |       |
|----------|------------|------------|------------|-------|-----------|-------------|----|--------|-----------|--|--------|---|---|---|---|-------|
| ONI70203 | Unassigned | Unassigned | Unassigned | 52_0  | Clustered | 87 VC_52_0  | 87 | 0.9858 | 1         |  | 0.9858 | 0 | 0 | 0 | 0 | 1 Ref |
| ONI70204 | Unassigned | Unassigned | Unassigned | 826_0 | Clustered | 91 VC_826_0 | 91 | 0.9935 | 1         |  | 0.9935 | 0 | 0 | 0 | 0 | 1 Ref |
| ONI70205 | Unassigned | Unassigned | Unassigned | 52_0  | Clustered | 87 VC_52_0  | 87 | 0.9858 | 1         |  | 0.9858 | 0 | 0 | 0 | 0 | 1 Ref |
| ONI70206 | Unassigned | Unassigned | Unassigned | 826_0 | Clustered | 91 VC_826_0 | 91 | 0.9935 | 1         |  | 0.9935 | 0 | 0 | 0 | 0 | 1 Ref |
| ONI70207 | Unassigned | Unassigned | Unassigned | 52_0  | Clustered | 87 VC_52_0  | 87 | 0.9858 | 1         |  | 0.9858 | 0 | 0 | 0 | 0 | 1 Ref |
| ONI70208 | Unassigned | Unassigned | Unassigned | 357_0 | Clustered | 53 VC_357_0 | 53 | 0.8979 | 1         |  | 0.8979 | 0 | 0 | 0 | 0 | 1 Ref |
| ONI70209 | Unassigned | Unassigned | Unassigned | 249_0 | Clustered | 5 VC_249_0  | 5  | 0.5515 | 0.9999999 |  | 0.5515 | 0 | 0 | 0 | 0 | 1 Ref |
| ONI70210 | Unassigned | Unassigned | Unassigned | 1_0   | Clustered | 54 VC_1_0   | 54 | 0.8527 | 1         |  | 0.8527 | 0 | 0 | 0 | 0 | 1 Ref |
| ONI70211 | Unassigned | Unassigned | Unassigned | 826_0 | Clustered | 91 VC_826_0 | 91 | 0.9935 | 1         |  | 0.9935 | 0 | 0 | 0 | 0 | 1 Ref |
| ONI70212 | Unassigned | Unassigned | Unassigned | 52_0  | Clustered | 87 VC_52_0  | 87 | 0.9858 | 1         |  | 0.9858 | 0 | 0 | 0 | 0 | 1 Ref |
| ONI70213 | Unassigned | Unassigned | Unassigned | 1_0   | Clustered | 54 VC_1_0   | 54 | 0.8527 | 1         |  | 0.8527 | 0 | 0 | 0 | 0 | 1 Ref |
| ONI70214 | Unassigned | Unassigned | Unassigned | 357_0 | Clustered | 53 VC_357_0 | 53 | 0.8979 | 1         |  | 0.8979 | 0 | 0 | 0 | 0 | 1 Ref |
| ONI70215 | Unassigned | Unassigned | Unassigned | 826_0 | Clustered | 91 VC_826_0 | 91 | 0.9935 | 1         |  | 0.9935 | 0 | 0 | 0 | 0 | 1 Ref |
| ONI70216 | Unassigned | Unassigned | Unassigned | 52_0  | Clustered | 87 VC_52_0  | 87 | 0.9858 | 1         |  | 0.9858 | 0 | 0 | 0 | 0 | 1 Ref |
| ONI70217 | Unassigned | Unassigned | Unassigned | 826_0 | Clustered | 91 VC_826_0 | 91 | 0.9935 | 1         |  | 0.9935 | 0 | 0 | 0 | 0 | 1 Ref |
| ONI70218 | Unassigned | Unassigned | Unassigned | 52_0  | Clustered | 87 VC_52_0  | 87 | 0.9858 | 1         |  | 0.9858 | 0 | 0 | 0 | 0 | 1 Ref |
| ONI70219 | Unassigned | Unassigned | Unassigned | 826_0 | Clustered | 91 VC_826_0 | 91 | 0.9935 | 1         |  | 0.9935 | 0 | 0 | 0 | 0 | 1 Ref |
| ONI70220 | Unassigned | Unassigned | Unassigned | 52_0  | Clustered | 87 VC_52_0  | 87 | 0.9858 | 1         |  | 0.9858 | 0 | 0 | 0 | 0 | 1 Ref |
| ONI70221 | Unassigned | Unassigned | Unassigned | 826_0 | Clustered | 91 VC_826_0 | 91 | 0.9935 | 1         |  | 0.9935 | 0 | 0 | 0 | 0 | 1 Ref |
| ONI70222 | Unassigned | Unassigned | Unassigned | 826_0 | Clustered | 91 VC_826_0 | 91 | 0.9935 | 1         |  | 0.9935 | 0 | 0 | 0 | 0 | 1 Ref |
| ONI70223 | Unassigned | Unassigned | Unassigned | 52_0  | Clustered | 87 VC_52_0  | 87 | 0.9858 | 1         |  | 0.9858 | 0 | 0 | 0 | 0 | 1 Ref |
| ONI70225 | Unassigned | Unassigned | Unassigned | 826_0 | Clustered | 91 VC_826_0 | 91 | 0.9935 | 1         |  | 0.9935 | 0 | 0 | 0 | 0 | 1 Ref |
| ONI70226 | Unassigned | Unassigned | Unassigned | 52_0  | Clustered | 87 VC_52_0  | 87 | 0.9858 | 1         |  | 0.9858 | 0 | 0 | 0 | 0 | 1 Ref |
| ONI70227 | Unassigned | Unassigned | Unassigned | 1_0   | Clustered | 54 VC_1_0   | 54 | 0.8527 | 1         |  | 0.8527 | 0 | 0 | 0 | 0 | 1 Ref |
| ONI70228 | Unassigned | Unassigned | Unassigned | 357_0 | Clustered | 53 VC_357_0 | 53 | 0.8979 | 1         |  | 0.8979 | 0 | 0 | 0 | 0 | 1 Ref |
| ONI70229 | Unassigned | Unassigned | Unassigned | 357_0 | Clustered | 53 VC_357_0 | 53 | 0.8979 | 1         |  | 0.8979 | 0 | 0 | 0 | 0 | 1 Ref |
| ONI70230 | Unassigned | Unassigned | Unassigned | 1_0   | Clustered | 54 VC_1_0   | 54 | 0.8527 | 1         |  | 0.8527 | 0 | 0 | 0 | 0 | 1 Ref |
| ONI70231 | Unassigned | Unassigned | Unassigned | 249_0 | Clustered | 5 VC_249_0  | 5  | 0.5515 | 0.9999999 |  | 0.5515 | 0 | 0 | 0 | 0 | 1 Ref |
| ONI70232 | Unassigned | Unassigned | Unassigned | 357_0 | Clustered | 53 VC_357_0 | 53 | 0.8979 | 1         |  | 0.8979 | 0 | 0 | 0 | 0 | 1 Ref |
| ONI70233 | Unassigned | Unassigned | Unassigned | 1_0   | Clustered | 54 VC_1_0   | 54 | 0.8527 | 1         |  | 0.8527 | 0 | 0 | 0 | 0 | 1 Ref |
| ONI70234 | Unassigned | Unassigned | Unassigned | 357_0 | Clustered | 53 VC_357_0 | 53 | 0.8979 | 1         |  | 0.8979 | 0 | 0 | 0 | 0 | 1 Ref |
| ONI70235 | Unassigned | Unassigned | Unassigned | 1_0   | Clustered | 54 VC_1_0   | 54 | 0.8527 | 1         |  | 0.8527 | 0 | 0 | 0 | 0 | 1 Ref |
| ONI70236 | Unassigned | Unassigned | Unassigned | 357_0 | Clustered | 53 VC_357_0 | 53 | 0.8979 | 1         |  | 0.8979 | 0 | 0 | 0 | 0 | 1 Ref |
| ONI70237 | Unassigned | Unassigned | Unassigned | 1_0   | Clustered | 54 VC_1_0   | 54 | 0.8527 | 1         |  | 0.8527 | 0 | 0 | 0 | 0 | 1 Ref |
| ONI70238 | Unassigned | Unassigned | Unassigned | 357_0 | Clustered | 53 VC_357_0 | 53 | 0.8979 | 1         |  | 0.8979 | 0 | 0 | 0 | 0 | 1 Ref |
| ONI70239 | Unassigned | Unassigned | Unassigned | 1_0   | Clustered | 54 VC_1_0   | 54 | 0.8527 | 1         |  | 0.8527 | 0 | 0 | 0 | 0 | 1 Ref |
| ONI70240 | Unassigned | Unassigned | Unassigned | 357_0 | Clustered | 53 VC_357_0 | 53 | 0.8979 | 1         |  | 0.8979 | 0 | 0 | 0 | 0 | 1 Ref |
| ONI70241 | Unassigned | Unassigned | Unassigned | 1_0   | Clustered | 54 VC_1_0   | 54 | 0.8527 | 1         |  | 0.8527 | 0 | 0 | 0 | 0 | 1 Ref |
| ONI70242 | Unassigned | Unassigned | Unassigned | 357_0 | Clustered | 53 VC_357_0 | 53 | 0.8979 | 1         |  | 0.8979 | 0 | 0 | 0 | 0 | 1 Ref |
| ONI70243 | Unassigned | Unassigned | Unassigned | 1_0   | Clustered | 54 VC_1_0   | 54 | 0.8527 | 1         |  | 0.8527 | 0 | 0 | 0 | 0 | 1 Ref |
| ONI70244 | Unassigned | Unassigned | Unassigned | 826_0 | Clustered | 91 VC_826_0 | 91 | 0.9935 | 1         |  | 0.9935 | 0 | 0 | 0 | 0 | 1 Ref |
| ONI70245 | Unassigned | Unassigned | Unassigned | 52_0  | Clustered | 87 VC_52_0  | 87 | 0.9858 | 1         |  | 0.9858 | 0 | 0 | 0 | 0 | 1 Ref |
| ONI70246 | Unassigned | Unassigned | Unassigned | 826_0 | Clustered | 91 VC_826_0 | 91 | 0.9935 | 1         |  | 0.9935 | 0 | 0 | 0 | 0 | 1 Ref |
| ONI70247 | Unassigned | Unassigned | Unassigned | 52_0  | Clustered | 87 VC_52_0  | 87 | 0.9858 | 1         |  | 0.9858 | 0 | 0 | 0 | 0 | 1 Ref |
| ONI70248 | Unassigned | Unassigned | Unassigned | 826_0 | Clustered | 91 VC_826_0 | 91 | 0.9935 | 1         |  | 0.9935 | 0 | 0 | 0 | 0 | 1 Ref |
| ONI70249 | Unassigned | Unassigned | Unassigned | 52_0  | Clustered | 87 VC_52_0  | 87 | 0.9858 | 1         |  | 0.9858 | 0 | 0 | 0 | 0 | 1 Ref |
| ONI70250 | Unassigned | Unassigned | Unassigned | 826_0 | Clustered | 91 VC_826_0 | 91 | 0.9935 | 1         |  | 0.9935 | 0 | 0 | 0 | 0 | 1 Ref |
| ONI70251 | Unassigned | Unassigned | Unassigned | 52_0  | Clustered | 87 VC_52_0  | 87 | 0.9858 | 1         |  | 0.9858 | 0 | 0 | 0 | 0 | 1 Ref |
| ONI70252 | Unassigned | Unassigned | Unassigned | 826_0 | Clustered | 91 VC_826_0 | 91 | 0.9935 | 1         |  | 0.9935 | 0 | 0 | 0 | 0 | 1 Ref |
| ONI70253 | Unassigned | Unassigned | Unassigned | 52_0  | Clustered | 87 VC_52_0  | 87 | 0.9858 | 1         |  | 0.9858 | 0 | 0 | 0 | 0 | 1 Ref |
| ONI70254 | Unassigned | Unassigned | Unassigned | 357_0 | Clustered | 53 VC_357_0 | 53 | 0.8979 | 1         |  | 0.8979 | 0 | 0 | 0 | 0 | 1 Ref |
| ONI70257 | Unassigned | Unassigned | Unassigned | 357_0 | Clustered | 53 VC_357_0 | 53 | 0.8979 | 1         |  | 0.8979 | 0 | 0 | 0 | 0 | 1 Ref |
| ONI70258 | Unassigned | Unassigned | Unassigned | 1_0   | Clustered | 54 VC_1_0   | 54 | 0.8527 | 1         |  | 0.8527 | 0 | 0 | 0 | 0 | 1 Ref |
| ONI70261 | Unassigned | Unassigned | Unassigned | 1_0   | Clustered | 54 VC_1_0   | 54 | 0.8527 | 1         |  | 0.8527 | 0 | 0 | 0 | 0 | 1 Ref |
| ONI70262 | Unassigned | Unassigned | Unassigned | 357_0 | Clustered | 53 VC_357_0 | 53 | 0.8979 | 1         |  | 0.8979 | 0 | 0 | 0 | 0 | 1 Ref |
| ONI70263 | Unassigned | Unassigned | Unassigned | 1_0   | Clustered | 54 VC_1_0   | 54 | 0.8527 | 1         |  | 0.8527 | 0 | 0 | 0 | 0 | 1 Ref |
| ONI70264 | Unassigned | Unassigned | Unassigned | 357_0 | Clustered | 53 VC_357_0 | 53 | 0.8979 | 1         |  | 0.8979 | 0 | 0 | 0 | 0 | 1 Ref |
| ONI70265 | Unassigned | Unassigned | Unassigned | 357_0 | Clustered | 53 VC_357_0 | 53 | 0.8979 | 1         |  | 0.8979 | 0 | 0 | 0 | 0 | 1 Ref |
| ONI70266 | Unassigned | Unassigned | Unassigned | 1_0   | Clustered | 54 VC_1_0   | 54 | 0.8527 | 1         |  | 0.8527 | 0 | 0 | 0 | 0 | 1 Ref |
| ONI70267 | Unassigned | Unassigned | Unassigned | 357_0 | Clustered | 53 VC_357_0 | 53 | 0.8979 | 1         |  | 0.8979 | 0 | 0 | 0 | 0 | 1 Ref |
| ONI70268 | Unassigned | Unassigned | Unassigned | 1_0   | Clustered | 54 VC_1_0   | 54 | 0.8527 | 1         |  | 0.8527 | 0 | 0 | 0 | 0 | 1 Ref |
| ONI70270 | Unassigned | Unassigned | Unassigned | 1_0   | Clustered | 54 VC_1_0   | 54 | 0.8527 | 1         |  | 0.8527 | 0 | 0 | 0 | 0 | 1 Ref |
| ONI70271 | Unassigned | Unassigned | Unassigned | 826_0 | Clustered | 91 VC_826_0 | 91 | 0.9935 | 1         |  | 0.9935 | 0 | 0 | 0 | 0 | 1 Ref |
| ONI70272 | Unassigned | Unassigned | Unassigned | 1_0   | Clustered | 54 VC_1_0   | 54 | 0.8527 | 1         |  | 0.8527 | 0 | 0 | 0 | 0 | 1 Ref |
| ONI70273 | Unassigned | Unassigned | Unassigned | 52_0  | Clustered | 87 VC_52_0  | 87 | 0.9858 | 1         |  | 0.9858 | 0 | 0 | 0 | 0 | 1 Ref |
| ONI70274 | Unassigned | Unassigned | Unassigned | 25_0  | Clustered | 12 VC_25_0  | 12 | 0.7945 | 1         |  | 0.7945 | 0 | 0 | 0 | 0 | 1 Ref |
| ONI70275 | Unassigned | Unassigned | Unassigned | 357_0 | Clustered | 53 VC_357_0 | 53 | 0.8979 | 1         |  | 0.8979 | 0 | 0 | 0 | 0 | 1 Ref |
| ONI70276 | Unassigned | Unassigned | Unassigned | 1_0   | Clustered | 54 VC_1_0   | 54 | 0.8527 | 1         |  | 0.8527 | 0 | 0 | 0 | 0 | 1 Ref |
| ONI70277 | Unassigned | Unassigned | Unassigned | 52_0  | Clustered | 87 VC_52_0  | 87 | 0.9858 | 1         |  | 0.9858 | 0 | 0 | 0 | 0 | 1 Ref |
| ONI70278 | Unassigned | Unassigned | Unassigned | 25_0  | Clustered | 12 VC_25_0  | 12 | 0.7945 | 1         |  | 0.7945 | 0 | 0 | 0 | 0 | 1 Ref |
| ONI70279 | Unassigned | Unassigned | Unassigned | 357_0 | Clustered | 53 VC_357_0 | 53 | 0.8979 | 1         |  | 0.8979 | 0 | 0 | 0 | 0 | 1 Ref |
| ONI70280 | Unassigned | Unassigned | Unassigned | 826_0 | Clustered | 91 VC_826_0 | 91 | 0.9935 | 1         |  | 0.9935 | 0 | 0 | 0 | 0 | 1 Ref |
| ONI70281 | Unassigned | Unassigned | Unassigned | 52_0  | Clustered | 87 VC_52_0  | 87 | 0.9858 | 1         |  | 0.9858 | 0 | 0 | 0 | 0 | 1 Ref |
| ONI70282 | Unassigned | Unassigned | Unassigned | 826_0 | Clustered | 91 VC_826_0 | 91 | 0.9935 | 1         |  | 0.9935 | 0 | 0 | 0 | 0 | 1 Ref |
| ONI70283 | Unassigned | Unassigned | Unassigned | 52_0  | Clustered | 87 VC_52_0  | 87 | 0.9858 | 1         |  | 0.9858 | 0 | 0 | 0 | 0 | 1 Ref |
| ONI70284 | Unassigned | Unassigned | Unassigned | 826_0 | Clustered | 91 VC_826_0 | 91 | 0.9935 | 1         |  | 0.9935 | 0 | 0 | 0 | 0 | 1 Ref |
| ONI70285 | Unassigned | Unassigned | Unassigned | 52_0  | Clustered | 87 VC_52_0  | 87 | 0.9858 | 1         |  | 0.9858 | 0 | 0 | 0 | 0 | 1 Ref |
| ONI70286 | Unassigned | Unassigned | Unassigned | 357_0 | Clustered | 53 VC_357_0 | 53 | 0.8979 | 1         |  | 0.8979 | 0 | 0 | 0 | 0 | 1 Ref |
| ONI70287 | Unassigned | Unassigned | Unassigned | 357_0 | Clustered | 53 VC_357_0 | 53 | 0.8979 | 1         |  | 0.8979 | 0 | 0 | 0 | 0 | 1 Ref |
| ONI70289 | Unassigned | Unassigned | Unassigned | 826_0 | Clustered | 91 VC_826_0 | 91 | 0.9935 | 1         |  | 0.9935 | 0 | 0 | 0 | 0 | 1 Ref |
| ONI70290 | Unassigned | Unassigned | Unassigned | 52_0  | Clustered | 87 VC_52_0  | 87 | 0.9858 | 1         |  | 0.9858 | 0 | 0 | 0 | 0 | 1 Ref |



|          |            |            |            |        |           |             |    |        |            |        |   |   |   |            |
|----------|------------|------------|------------|--------|-----------|-------------|----|--------|------------|--------|---|---|---|------------|
| ONI70291 | Unassigned | Unassigned | Unassigned | 826_0  | Clustered | 91 VC_826_0 | 91 | 0.9935 | 1          | 0.9935 | 0 | 0 | 0 | 1 Ref      |
| ONI70292 | Unassigned | Unassigned | Unassigned | 52_0   | Clustered | 87 VC_52_0  | 87 | 0.9858 | 1          | 0.9858 | 0 | 0 | 0 | 1 Ref      |
| ONI70293 | Unassigned | Unassigned | Unassigned | 826_0  | Clustered | 91 VC_826_0 | 91 | 0.9935 | 1          | 0.9935 | 0 | 0 | 0 | 1 Ref      |
| ONI70294 | Unassigned | Unassigned | Unassigned | 52_0   | Clustered | 87 VC_52_0  | 87 | 0.9858 | 1          | 0.9858 | 0 | 0 | 0 | 1 Ref      |
| ONI70295 | Unassigned | Unassigned | Unassigned | 826_0  | Clustered | 91 VC_826_0 | 91 | 0.9935 | 1          | 0.9935 | 0 | 0 | 0 | 1 Ref      |
| ONI70296 | Unassigned | Unassigned | Unassigned | 52_0   | Clustered | 87 VC_52_0  | 87 | 0.9858 | 1          | 0.9858 | 0 | 0 | 0 | 1 Ref      |
| ONI70297 | Unassigned | Unassigned | Unassigned | 826_0  | Clustered | 91 VC_826_0 | 91 | 0.9935 | 1          | 0.9935 | 0 | 0 | 0 | 1 Ref      |
| ONI70298 | Unassigned | Unassigned | Unassigned | 826_0  | Clustered | 91 VC_826_0 | 91 | 0.9935 | 1          | 0.9935 | 0 | 0 | 0 | 1 Ref      |
| ONI70299 | Unassigned | Unassigned | Unassigned | 52_0   | Clustered | 87 VC_52_0  | 87 | 0.9858 | 1          | 0.9858 | 0 | 0 | 0 | 1 Ref      |
| ONI70300 | Unassigned | Unassigned | Unassigned | 826_0  | Clustered | 91 VC_826_0 | 91 | 0.9935 | 1          | 0.9935 | 0 | 0 | 0 | 1 Ref      |
| ONI70301 | Unassigned | Unassigned | Unassigned | 52_0   | Clustered | 87 VC_52_0  | 87 | 0.9858 | 1          | 0.9858 | 0 | 0 | 0 | 1 Ref      |
| ONI70302 | Unassigned | Unassigned | Unassigned | 249_0  | Clustered | 5 VC_249_0  | 5  | 0.5515 | 0.9999999  | 0.5515 | 0 | 0 | 0 | 1 Ref      |
| ONI70303 | Unassigned | Unassigned | Unassigned | 357_0  | Clustered | 53 VC_357_0 | 53 | 0.8979 | 1          | 0.8979 | 0 | 0 | 0 | 1 Ref      |
| ONI70304 | Unassigned | Unassigned | Unassigned | 1_0    | Clustered | 54 VC_1_0   | 54 | 0.8527 | 1          | 0.8527 | 0 | 0 | 0 | 1 Ref      |
| ONI70305 | Unassigned | Unassigned | Unassigned | 1_0    | Clustered | 54 VC_1_0   | 54 | 0.8527 | 1          | 0.8527 | 0 | 0 | 0 | 1 Ref      |
| ONI70306 | Unassigned | Unassigned | Unassigned | 826_0  | Clustered | 91 VC_826_0 | 91 | 0.9935 | 1          | 0.9935 | 0 | 0 | 0 | 1 Ref      |
| ONI70307 | Unassigned | Unassigned | Unassigned | 826_0  | Clustered | 91 VC_826_0 | 91 | 0.9935 | 1          | 0.9935 | 0 | 0 | 0 | 1 Ref      |
| ONI70308 | Unassigned | Unassigned | Unassigned | 52_0   | Clustered | 87 VC_52_0  | 87 | 0.9858 | 1          | 0.9858 | 0 | 0 | 0 | 1 Ref      |
| ONI70311 | Unassigned | Unassigned | Unassigned | 826_0  | Clustered | 91 VC_826_0 | 91 | 0.9935 | 1          | 0.9935 | 0 | 0 | 0 | 1 Ref      |
| ONI70312 | Unassigned | Unassigned | Unassigned | 52_0   | Clustered | 87 VC_52_0  | 87 | 0.9858 | 1          | 0.9858 | 0 | 0 | 0 | 1 Ref      |
| ONI70313 | Unassigned | Unassigned | Unassigned | 826_0  | Clustered | 91 VC_826_0 | 91 | 0.9935 | 1          | 0.9935 | 0 | 0 | 0 | 1 Ref      |
| ONI70314 | Unassigned | Unassigned | Unassigned | 52_0   | Clustered | 87 VC_52_0  | 87 | 0.9858 | 1          | 0.9858 | 0 | 0 | 0 | 1 Ref      |
| ONI70315 | Unassigned | Unassigned | Unassigned | 826_0  | Clustered | 91 VC_826_0 | 91 | 0.9935 | 1          | 0.9935 | 0 | 0 | 0 | 1 Ref      |
| ONI70316 | Unassigned | Unassigned | Unassigned | 52_0   | Clustered | 87 VC_52_0  | 87 | 0.9858 | 1          | 0.9858 | 0 | 0 | 0 | 1 Ref      |
| ONI70317 | Unassigned | Unassigned | Unassigned | 357_0  | Clustered | 53 VC_357_0 | 53 | 0.8979 | 1          | 0.8979 | 0 | 0 | 0 | 1 Ref      |
| ONI70318 | Unassigned | Unassigned | Unassigned | 70_0   | Clustered | 27 VC_70_0  | 27 | 0.5981 | 1          | 0.5981 | 0 | 0 | 0 | 0.9886 Ref |
| ONI70320 | Unassigned | Unassigned | Unassigned | 53_0   | Clustered | 5 VC_53_0   | 5  | 0.4977 | 0.99999808 | 0.4977 | 0 | 0 | 0 | 1 Ref      |
| ONI70321 | Unassigned | Unassigned | Unassigned | 1_0    | Clustered | 54 VC_1_0   | 54 | 0.8527 | 1          | 0.8527 | 0 | 0 | 0 | 1 Ref      |
| ONI70322 | Unassigned | Unassigned | Unassigned | 358_0  | Clustered | 3 VC_358_0  | 3  | 0.5146 | 0.97657291 | 0.5026 | 0 | 0 | 0 | 1 Ref      |
| ONI70323 | Unassigned | Unassigned | Unassigned | 357_0  | Clustered | 53 VC_357_0 | 53 | 0.8979 | 1          | 0.8979 | 0 | 0 | 0 | 1 Ref      |
| ONI70324 | Unassigned | Unassigned | Unassigned | 357_0  | Clustered | 53 VC_357_0 | 53 | 0.8979 | 1          | 0.8979 | 0 | 0 | 0 | 1 Ref      |
| ONI70325 | Unassigned | Unassigned | Unassigned | 1_0    | Clustered | 54 VC_1_0   | 54 | 0.8527 | 1          | 0.8527 | 0 | 0 | 0 | 1 Ref      |
| ONI70326 | Unassigned | Unassigned | Unassigned | 357_0  | Clustered | 53 VC_357_0 | 53 | 0.8979 | 1          | 0.8979 | 0 | 0 | 0 | 1 Ref      |
| ONI70327 | Unassigned | Unassigned | Unassigned | 357_0  | Clustered | 53 VC_357_0 | 53 | 0.8979 | 1          | 0.8979 | 0 | 0 | 0 | 1 Ref      |
| ONI70328 | Unassigned | Unassigned | Unassigned | 249_0  | Clustered | 5 VC_249_0  | 5  | 0.5515 | 0.9999999  | 0.5515 | 0 | 0 | 0 | 1 Ref      |
| ONI70329 | Unassigned | Unassigned | Unassigned | 1_0    | Clustered | 54 VC_1_0   | 54 | 0.8527 | 1          | 0.8527 | 0 | 0 | 0 | 1 Ref      |
| ONI70330 | Unassigned | Unassigned | Unassigned | 826_0  | Clustered | 91 VC_826_0 | 91 | 0.9935 | 1          | 0.9935 | 0 | 0 | 0 | 1 Ref      |
| ONI70331 | Unassigned | Unassigned | Unassigned | 52_0   | Clustered | 87 VC_52_0  | 87 | 0.9858 | 1          | 0.9858 | 0 | 0 | 0 | 1 Ref      |
| ONI70332 | Unassigned | Unassigned | Unassigned | 826_0  | Clustered | 91 VC_826_0 | 91 | 0.9935 | 1          | 0.9935 | 0 | 0 | 0 | 1 Ref      |
| ONI70333 | Unassigned | Unassigned | Unassigned | 52_0   | Clustered | 87 VC_52_0  | 87 | 0.9858 | 1          | 0.9858 | 0 | 0 | 0 | 1 Ref      |
| ONI70334 | Unassigned | Unassigned | Unassigned | 826_0  | Clustered | 91 VC_826_0 | 91 | 0.9935 | 1          | 0.9935 | 0 | 0 | 0 | 1 Ref      |
| ONI70335 | Unassigned | Unassigned | Unassigned | 52_0   | Clustered | 87 VC_52_0  | 87 | 0.9858 | 1          | 0.9858 | 0 | 0 | 0 | 1 Ref      |
| ONI70336 | Unassigned | Unassigned | Unassigned | 826_0  | Clustered | 91 VC_826_0 | 91 | 0.9935 | 1          | 0.9935 | 0 | 0 | 0 | 1 Ref      |
| ONI70337 | Unassigned | Unassigned | Unassigned | 52_0   | Clustered | 87 VC_52_0  | 87 | 0.9858 | 1          | 0.9858 | 0 | 0 | 0 | 1 Ref      |
| ONI70338 | Unassigned | Unassigned | Unassigned | 826_0  | Clustered | 91 VC_826_0 | 91 | 0.9935 | 1          | 0.9935 | 0 | 0 | 0 | 1 Ref      |
| ONI70339 | Unassigned | Unassigned | Unassigned | 52_0   | Clustered | 87 VC_52_0  | 87 | 0.9858 | 1          | 0.9858 | 0 | 0 | 0 | 1 Ref      |
| ONI70340 | Unassigned | Unassigned | Unassigned | 826_0  | Clustered | 91 VC_826_0 | 91 | 0.9935 | 1          | 0.9935 | 0 | 0 | 0 | 1 Ref      |
| ONI70341 | Unassigned | Unassigned | Unassigned | 52_0   | Clustered | 87 VC_52_0  | 87 | 0.9858 | 1          | 0.9858 | 0 | 0 | 0 | 1 Ref      |
| ONI70343 | Unassigned | Unassigned | Unassigned | 357_0  | Clustered | 53 VC_357_0 | 53 | 0.8979 | 1          | 0.8979 | 0 | 0 | 0 | 1 Ref      |
| ONI70344 | Unassigned | Unassigned | Unassigned | 1_0    | Clustered | 54 VC_1_0   | 54 | 0.8527 | 1          | 0.8527 | 0 | 0 | 0 | 1 Ref      |
| ONI70347 | Unassigned | Unassigned | Unassigned | 1_0    | Clustered | 54 VC_1_0   | 54 | 0.8527 | 1          | 0.8527 | 0 | 0 | 0 | 1 Ref      |
| ONI70348 | Unassigned | Unassigned | Unassigned | 1_0    | Clustered | 54 VC_1_0   | 54 | 0.8527 | 1          | 0.8527 | 0 | 0 | 0 | 1 Ref      |
| ONI70351 | Unassigned | Unassigned | Unassigned | 1_0    | Clustered | 54 VC_1_0   | 54 | 0.8527 | 1          | 0.8527 | 0 | 0 | 0 | 1 Ref      |
| ONI70352 | Unassigned | Unassigned | Unassigned | 826_0  | Clustered | 91 VC_826_0 | 91 | 0.9935 | 1          | 0.9935 | 0 | 0 | 0 | 1 Ref      |
| ONI70353 | Unassigned | Unassigned | Unassigned | 52_0   | Clustered | 87 VC_52_0  | 87 | 0.9858 | 1          | 0.9858 | 0 | 0 | 0 | 1 Ref      |
| ONI70354 | Unassigned | Unassigned | Unassigned | 180_0  | Clustered | 4 VC_180_0  | 4  | 0.2056 | 0.9999862  | 0.2056 | 0 | 0 | 0 | 1 Ref      |
| ONI70355 | Unassigned | Unassigned | Unassigned | 357_0  | Clustered | 53 VC_357_0 | 53 | 0.8979 | 1          | 0.8979 | 0 | 0 | 0 | 1 Ref      |
| ONI70356 | Unassigned | Unassigned | Unassigned | 826_0  | Clustered | 91 VC_826_0 | 91 | 0.9935 | 1          | 0.9935 | 0 | 0 | 0 | 1 Ref      |
| ONI70357 | Unassigned | Unassigned | Unassigned | 25_0   | Clustered | 12 VC_25_0  | 12 | 0.7945 | 1          | 0.7945 | 0 | 0 | 0 | 1 Ref      |
| ONI70358 | Unassigned | Unassigned | Unassigned | 70_0   | Clustered | 27 VC_70_0  | 27 | 0.5981 | 1          | 0.5981 | 0 | 0 | 0 | 0.9886 Ref |
| ONI70359 | Unassigned | Unassigned | Unassigned | 357_0  | Clustered | 53 VC_357_0 | 53 | 0.8979 | 1          | 0.8979 | 0 | 0 | 0 | 1 Ref      |
| ONI70360 | Unassigned | Unassigned | Unassigned | 826_0  | Clustered | 91 VC_826_0 | 91 | 0.9935 | 1          | 0.9935 | 0 | 0 | 0 | 1 Ref      |
| ONI84124 | Unassigned | Unassigned | Unassigned | 835_0  | Clustered | 67 VC_835_0 | 67 | 0.9624 | 1          | 0.9624 | 0 | 0 | 0 | 1 Ref      |
| ONI84125 | Unassigned | Unassigned | Unassigned | 131_1  | Clustered | 6 VC_131_1  | 6  | 0.057  | 0.99999999 | 0.057  | 0 | 0 | 0 | 1 Ref      |
| ONI84126 | Unassigned | Unassigned | Unassigned | 131_1  | Clustered | 6 VC_131_1  | 6  | 0.057  | 0.99999999 | 0.057  | 0 | 0 | 0 | 1 Ref      |
| ONI85577 | Unassigned | Unassigned | Unassigned | 575_0  | Clustered | 35 VC_575_0 | 35 | 0.8815 | 1          | 0.8815 | 0 | 0 | 0 | 1 Ref      |
| ONI85580 | Unassigned | Unassigned | Unassigned | 452_0  | Clustered | 66 VC_452_0 | 66 | 0.9248 | 1          | 0.9248 | 0 | 0 | 0 | 1 Ref      |
| ONI85581 | Unassigned | Unassigned | Unassigned | 190_28 | Clustered | 5 VC_190_28 | 5  | 0.0304 | 0.99999994 | 0.0304 | 0 | 0 | 0 | 1 Ref      |
| ONI85582 | Unassigned | Unassigned | Unassigned | 190_28 | Clustered | 5 VC_190_28 | 5  | 0.0304 | 0.99999994 | 0.0304 | 0 | 0 | 0 | 1 Ref      |
| ONI85583 | Unassigned | Unassigned | Unassigned | 190_28 | Clustered | 5 VC_190_28 | 5  | 0.0304 | 0.99999994 | 0.0304 | 0 | 0 | 0 | 1 Ref      |
| ONI85584 | Unassigned | Unassigned | Unassigned | 190_28 | Clustered | 5 VC_190_28 | 5  | 0.0304 | 0.99999994 | 0.0304 | 0 | 0 | 0 | 1 Ref      |
| ONI85585 | Unassigned | Unassigned | Unassigned | 190_24 | Clustered | 5 VC_190_24 | 5  | 0.0293 | 0.99999996 | 0.0293 | 0 | 0 | 0 | 0.7 Ref    |
| ONI85586 | Unassigned | Unassigned | Unassigned | 942_0  | Clustered | 36 VC_942_0 | 36 | 0.7848 | 1          | 0.7848 | 0 | 0 | 0 | 1 Ref      |
| ONI85587 | Unassigned | Unassigned | Unassigned | 942_0  | Clustered | 36 VC_942_0 | 36 | 0.7848 | 1          | 0.7848 | 0 | 0 | 0 | 1 Ref      |
| ONI85588 | Unassigned | Unassigned | Unassigned | 942_0  | Clustered | 36 VC_942_0 | 36 | 0.7848 | 1          | 0.7848 | 0 | 0 | 0 | 1 Ref      |
| ONI85589 | Unassigned | Unassigned | Unassigned | 941_0  | Clustered | 40 VC_941_0 | 40 | 0.6903 | 1          | 0.6903 | 0 | 0 | 0 | 1 Ref      |
| ONI89042 | Unassigned | Unassigned | Unassigned | 749_0  | Clustered | 40 VC_749_0 | 40 | 0.7517 | 1          | 0.7517 | 0 | 0 | 0 | 1 Ref      |
| ONI89043 | Unassigned | Unassigned | Unassigned | 749_0  | Clustered | 40 VC_749_0 | 40 | 0.7517 | 1          | 0.7517 | 0 | 0 | 0 | 1 Ref      |
| ONI89044 | Unassigned | Unassigned | Unassigned | 749_0  | Clustered | 40 VC_749_0 | 40 | 0.7517 | 1          | 0.7517 | 0 | 0 | 0 | 1 Ref      |
| ONI89045 | Unassigned | Unassigned | Unassigned | 169_0  | Clustered | 20 VC_169_0 | 20 | 0.7529 | 1          | 0.7529 | 0 | 0 | 0 | 1 Ref      |
| ONI89046 | Unassigned | Unassigned | Unassigned | 129_0  | Clustered | 43 VC_129_0 | 43 | 0.886  | 1          | 0.886  | 0 | 0 | 0 | 1 Ref      |



|          |            |            |            |         |                     |              |     |        |            |        |   |   |   |            |
|----------|------------|------------|------------|---------|---------------------|--------------|-----|--------|------------|--------|---|---|---|------------|
| ON189047 | Unassigned | Unassigned | Unassigned | 169_0   | Clustered           | 20 VC_169_0  | 20  | 0.7529 | 1          | 0.7529 | 0 | 0 | 0 | 1 Ref      |
| ON189048 | Unassigned | Unassigned | Unassigned | 172_0   | Clustered           | 5 VC_172_0   | 5   | 0.3579 | 0.99999997 | 0.3579 | 0 | 0 | 0 | 1 Ref      |
| ON190024 | Unassigned | Unassigned | Unassigned | 531_1   | Clustered           | 6 VC_531_1   | 6   | 0.1481 | 0.99978665 | 0.148  | 0 | 0 | 0 | 1 Ref      |
| ON190025 | Unassigned | Unassigned | Unassigned | 531_0   | Clustered           | 9 VC_531_0   | 9   | 0.26   | 1          | 0.26   | 0 | 0 | 0 | 1 Ref      |
| ON202820 | Unassigned | Unassigned | Unassigned | 132_1   | Clustered           | 17 VC_132_1  | 17  | 0.1738 | 1          | 0.1738 | 0 | 0 | 0 | 0.9853 Ref |
| ON208829 | Unassigned | Unassigned | Unassigned | 325_57  | Clustered/Singleton | 1 VC_325_57  | 1   | 0      | 1          | 0      | 0 | 0 | 0 | 1 Ref      |
| ON208830 | Unassigned | Unassigned | Unassigned | 1072_3  | Clustered           | 6 VC_1072_3  | 6   | 0.1304 | 0.99999994 | 0.1304 | 0 | 0 | 0 | 0.8667 Ref |
| ON208832 | Unassigned | Unassigned | Unassigned | 982_0   | Clustered           | 62 VC_982_0  | 62  | 0.8646 | 1          | 0.8646 | 0 | 0 | 0 | 0.743 Ref  |
| ON208833 | Unassigned | Unassigned | Unassigned | 1207_0  | Clustered           | 29 VC_1207_0 | 29  | 0.8225 | 1          | 0.8225 | 0 | 0 | 0 | 1 Ref      |
| ON210136 | Unassigned | Unassigned | Unassigned | 835_0   | Clustered           | 67 VC_835_0  | 67  | 0.9624 | 1          | 0.9624 | 0 | 0 | 0 | 1 Ref      |
| ON210137 | Unassigned | Unassigned | Unassigned | 618_0   | Clustered           | 13 VC_618_0  | 13  | 0.6252 | 1          | 0.6252 | 0 | 0 | 0 | 1 Ref      |
| ON210138 | Unassigned | Unassigned | Unassigned | 329_20  | Clustered           | 4 VC_329_20  | 4   | 0.0174 | 0.99998777 | 0.0174 | 0 | 0 | 0 | 1 Ref      |
| ON210139 | Unassigned | Unassigned | Unassigned | 283_98  | Clustered/Singleton | 1 VC_283_98  | 1   | 0      | 1          | 0      | 0 | 0 | 0 | 1 Ref      |
| ON210142 | Unassigned | Unassigned | Unassigned | 699_0   | Clustered           | 71 VC_699_0  | 71  | 0.9352 | 1          | 0.9352 | 0 | 0 | 0 | 1 Ref      |
| ON210144 | Unassigned | Unassigned | Unassigned | 452_0   | Clustered           | 66 VC_452_0  | 66  | 0.9248 | 1          | 0.9248 | 0 | 0 | 0 | 1 Ref      |
| ON210145 | Unassigned | Unassigned | Unassigned | 452_0   | Clustered           | 66 VC_452_0  | 66  | 0.9248 | 1          | 0.9248 | 0 | 0 | 0 | 1 Ref      |
| ON210834 | Unassigned | Unassigned | Unassigned | 214_0   | Clustered           | 2 VC_214_0   | 2   | 0.2179 | 0.95358803 | 0.2078 | 0 | 0 | 0 | 1 Ref      |
| ON210835 | Unassigned | Unassigned | Unassigned | 214_0   | Clustered           | 2 VC_214_0   | 2   | 0.2179 | 0.95358803 | 0.2078 | 0 | 0 | 0 | 1 Ref      |
| ON212266 | Unassigned | Unassigned | Unassigned | 131_1   | Clustered           | 6 VC_131_1   | 6   | 0.057  | 0.99999999 | 0.057  | 0 | 0 | 0 | 1 Ref      |
| ON229909 | Unassigned | Unassigned | Unassigned | 283_160 | Clustered/Singleton | 1 VC_283_160 | 1   | 0      | 1          | 0      | 0 | 0 | 0 | 1 Ref      |
| ON237674 | Unassigned | Unassigned | Unassigned | 698_0   | Clustered           | 26 VC_698_0  | 26  | 0.9366 | 1          | 0.9366 | 0 | 0 | 0 | 1 Ref      |
| ON239128 | Unassigned | Unassigned | Unassigned | 329_11  | Clustered           | 15 VC_329_11 | 15  | 0.0791 | 1          | 0.0791 | 0 | 0 | 0 | 0.9333 Ref |
| ON239131 | Unassigned | Unassigned | Unassigned | 228_0   | Clustered           | 60 VC_228_0  | 60  | 0.942  | 1          | 0.942  | 0 | 0 | 0 | 1 Ref      |
| ON239132 | Unassigned | Unassigned | Unassigned | 461_0   | Clustered           | 96 VC_461_0  | 96  | 0.9307 | 1          | 0.9307 | 0 | 0 | 0 | 0.9575 Ref |
| ON260812 | Unassigned | Unassigned | Unassigned | 1344_0  | Clustered           | 78 VC_1344_0 | 78  | 0.9732 | 1          | 0.9732 | 0 | 0 | 0 | 1 Ref      |
| ON260813 | Unassigned | Unassigned | Unassigned | 510_0   | Clustered           | 12 VC_510_0  | 12  | 0.3963 | 1          | 0.3963 | 0 | 0 | 0 | 0.9697 Ref |
| ON260814 | Unassigned | Unassigned | Unassigned | 1344_0  | Clustered           | 78 VC_1344_0 | 78  | 0.9732 | 1          | 0.9732 | 0 | 0 | 0 | 1 Ref      |
| ON260815 | Unassigned | Unassigned | Unassigned | 1352_0  | Clustered           | 31 VC_1352_0 | 31  | 0.849  | 1          | 0.849  | 0 | 0 | 0 | 1 Ref      |
| ON260816 | Unassigned | Unassigned | Unassigned | 236_0   | Clustered           | 72 VC_236_0  | 72  | 0.8104 | 1          | 0.8104 | 0 | 0 | 0 | 1 Ref      |
| ON260817 | Unassigned | Unassigned | Unassigned | 1361_0  | Clustered           | 6 VC_1361_0  | 6   | 0.2371 | 1          | 0.2371 | 0 | 0 | 0 | 1 Ref      |
| ON260818 | Unassigned | Unassigned | Unassigned | 686_0   | Clustered           | 2 VC_686_0   | 2   | 0.2147 | 0.9539194  | 0.2048 | 0 | 0 | 0 | 1 Ref      |
| ON260819 | Unassigned | Unassigned | Unassigned | 1071_0  | Clustered           | 20 VC_1071_0 | 20  | 0.3268 | 1          | 0.3268 | 0 | 0 | 0 | 0.9842 Ref |
| ON260820 | Unassigned | Unassigned | Unassigned | 1352_0  | Clustered           | 31 VC_1352_0 | 31  | 0.849  | 1          | 0.849  | 0 | 0 | 0 | 1 Ref      |
| ON260821 | Unassigned | Unassigned | Unassigned | 1162_0  | Clustered           | 10 VC_1162_0 | 10  | 0.5715 | 1          | 0.5715 | 0 | 0 | 0 | 1 Ref      |
| ON260822 | Unassigned | Unassigned | Unassigned | 1166_0  | Clustered           | 20 VC_1166_0 | 20  | 0.99   | 1          | 0.99   | 0 | 0 | 0 | 1 Ref      |
| ON260823 | Unassigned | Unassigned | Unassigned | 1240_0  | Clustered           | 82 VC_1240_0 | 82  | 0.7945 | 1          | 0.7945 | 0 | 0 | 0 | 1 Ref      |
| ON260824 | Unassigned | Unassigned | Unassigned | 558_20  | Clustered           | 17 VC_558_20 | 17  | 0.054  | 1          | 0.054  | 0 | 0 | 0 | 0.9926 Ref |
| ON260825 | Unassigned | Unassigned | Unassigned | 1348_0  | Clustered           | 5 VC_1348_0  | 5   | 0.5462 | 0.99999985 | 0.5462 | 0 | 0 | 0 | 1 Ref      |
| ON260826 | Unassigned | Unassigned | Unassigned | 406_0   | Clustered           | 11 VC_406_0  | 11  | 0.9449 | 1          | 0.9449 | 0 | 0 | 0 | 1 Ref      |
| ON260827 | Unassigned | Unassigned | Unassigned | 856_0   | Clustered           | 7 VC_856_0   | 7   | 0.3463 | 1          | 0.3463 | 0 | 0 | 0 | 1 Ref      |
| ON260828 | Unassigned | Unassigned | Unassigned | 1071_0  | Clustered           | 20 VC_1071_0 | 20  | 0.3268 | 1          | 0.3268 | 0 | 0 | 0 | 0.9842 Ref |
| ON260829 | Unassigned | Unassigned | Unassigned | 556_0   | Clustered           | 21 VC_556_0  | 21  | 0.9912 | 1          | 0.9912 | 0 | 0 | 0 | 1 Ref      |
| ON286972 | Unassigned | Unassigned | Unassigned | 164_3   | Clustered/Singleton | 1 VC_164_3   | 1   | 0      | 1          | 0      | 0 | 0 | 0 | 1 Ref      |
| ON286973 | Unassigned | Unassigned | Unassigned | 772_8   | Clustered           | 2 VC_772_8   | 2   | 0.006  | 0.58293682 | 0.0035 | 0 | 0 | 0 | 1 Ref      |
| ON286974 | Unassigned | Unassigned | Unassigned | 590_0   | Clustered           | 27 VC_590_0  | 27  | 0.9947 | 1          | 0.9947 | 0 | 0 | 0 | 1 Ref      |
| ON286975 | Unassigned | Unassigned | Unassigned | 772_1   | Clustered           | 2 VC_772_1   | 2   | 0.006  | 0.57682361 | 0.0034 | 0 | 0 | 0 | 1 Ref      |
| ON286976 | Unassigned | Unassigned | Unassigned | 91_0    | Clustered           | 22 VC_91_0   | 22  | 0.5318 | 1          | 0.5318 | 0 | 0 | 0 | 1 Ref      |
| ON287369 | Unassigned | Unassigned | Unassigned | 849_0   | Clustered           | 3 VC_849_0   | 3   | 0.069  | 0.9984794  | 0.0689 | 0 | 0 | 0 | 1 Ref      |
| ON287370 | Unassigned | Unassigned | Unassigned | 442_1   | Clustered           | 3 VC_442_1   | 3   | 0.0538 | 0.99419552 | 0.0535 | 0 | 0 | 0 | 1 Ref      |
| ON287372 | Unassigned | Unassigned | Unassigned | 488_1   | Clustered           | 8 VC_488_1   | 8   | 0.2927 | 1          | 0.2927 | 0 | 0 | 0 | 1 Ref      |
| ON287373 | Unassigned | Unassigned | Unassigned | 196_0   | Clustered           | 2 VC_196_0   | 2   | 0.0218 | 0.95762696 | 0.0209 | 0 | 0 | 0 | 1 Ref      |
| ON287374 | Unassigned | Unassigned | Unassigned | 849_0   | Clustered           | 3 VC_849_0   | 3   | 0.069  | 0.9984794  | 0.0689 | 0 | 0 | 0 | 1 Ref      |
| ON287375 | Unassigned | Unassigned | Unassigned | 442_1   | Clustered           | 3 VC_442_1   | 3   | 0.0538 | 0.99419552 | 0.0535 | 0 | 0 | 0 | 1 Ref      |
| ON287376 | Unassigned | Unassigned | Unassigned | 488_1   | Clustered           | 8 VC_488_1   | 8   | 0.2927 | 1          | 0.2927 | 0 | 0 | 0 | 1 Ref      |
| ON287377 | Unassigned | Unassigned | Unassigned | 878_0   | Clustered           | 32 VC_878_0  | 32  | 0.9965 | 1          | 0.9965 | 0 | 0 | 0 | 1 Ref      |
| ON287378 | Unassigned | Unassigned | Unassigned | 393_0   | Clustered           | 7 VC_393_0   | 7   | 0.1775 | 1          | 0.1775 | 0 | 0 | 0 | 1 Ref      |
| ON323462 | Unassigned | Unassigned | Unassigned | 132_1   | Clustered           | 17 VC_132_1  | 17  | 0.1738 | 1          | 0.1738 | 0 | 0 | 0 | 0.9853 Ref |
| ON323491 | Unassigned | Unassigned | Unassigned | 1090_0  | Clustered           | 4 VC_1090_0  | 4   | 1      | 1          | 1      | 0 | 0 | 0 | 1 Ref      |
| ON324181 | Unassigned | Unassigned | Unassigned | 79_0    | Clustered           | 64 VC_79_0   | 64  | 0.4185 | 1          | 0.4185 | 0 | 0 | 0 | 0.7649 Ref |
| ON331942 | Unassigned | Unassigned | Unassigned | 169_0   | Clustered           | 20 VC_169_0  | 20  | 0.7529 | 1          | 0.7529 | 0 | 0 | 0 | 1 Ref      |
| ON337194 | Unassigned | Unassigned | Unassigned | 1240_0  | Clustered           | 82 VC_1240_0 | 82  | 0.7945 | 1          | 0.7945 | 0 | 0 | 0 | 1 Ref      |
| ON337195 | Unassigned | Unassigned | Unassigned | 1167_0  | Clustered           | 6 VC_1167_0  | 6   | 0.8642 | 0.99999946 | 0.8642 | 0 | 0 | 0 | 1 Ref      |
| ON337196 | Unassigned | Unassigned | Unassigned | 515_0   | Clustered           | 16 VC_515_0  | 16  | 0.3793 | 1          | 0.3793 | 0 | 0 | 0 | 1 Ref      |
| ON352054 | Unassigned | Unassigned | Unassigned | 967_0   | Clustered           | 16 VC_967_0  | 16  | 0.8971 | 1          | 0.8971 | 0 | 0 | 0 | 1 Ref      |
| ON361134 | Unassigned | Unassigned | Unassigned | 80_0    | Clustered           | 41 VC_80_0   | 41  | 0.5837 | 1          | 0.5837 | 0 | 0 | 0 | 0.9805 Ref |
| ON361135 | Unassigned | Unassigned | Unassigned | 76_0    | Clustered           | 37 VC_76_0   | 37  | 0.9403 | 1          | 0.9403 | 0 | 0 | 0 | 1 Ref      |
| ON375838 | Unassigned | Unassigned | Unassigned | 79_0    | Clustered           | 64 VC_79_0   | 64  | 0.4185 | 1          | 0.4185 | 0 | 0 | 0 | 0.7649 Ref |
| ON375839 | Unassigned | Unassigned | Unassigned | 79_0    | Clustered           | 64 VC_79_0   | 64  | 0.4185 | 1          | 0.4185 | 0 | 0 | 0 | 0.7649 Ref |
| ON375840 | Unassigned | Unassigned | Unassigned | 79_0    | Clustered           | 64 VC_79_0   | 64  | 0.4185 | 1          | 0.4185 | 0 | 0 | 0 | 0.7649 Ref |
| ON375847 | Unassigned | Unassigned | Unassigned | 488_1   | Clustered           | 8 VC_488_1   | 8   | 0.2927 | 1          | 0.2927 | 0 | 0 | 0 | 1 Ref      |
| ON376263 | Unassigned | Unassigned | Unassigned | 472_0   | Clustered           | 47 VC_472_0  | 47  | 0.9025 | 1          | 0.9025 | 0 | 0 | 0 | 1 Ref      |
| ON381767 | Unassigned | Unassigned | Unassigned | 744_0   | Clustered           | 10 VC_744_0  | 10  | 0.7049 | 1          | 0.7049 | 0 | 0 | 0 | 1 Ref      |
| ON381768 | Unassigned | Unassigned | Unassigned | 637_0   | Clustered           | 115 VC_637_0 | 115 | 0.731  | 1          | 0.731  | 0 | 0 | 0 | 0.8764 Ref |
| ON391668 | Unassigned | Unassigned | Unassigned | 638_0   | Clustered           | 45 VC_638_0  | 45  | 0.7741 | 1          | 0.7741 | 0 | 0 | 0 | 1 Ref      |
| ON391949 | Unassigned | Unassigned | Unassigned | 696_1   | Clustered           | 8 VC_696_1   | 8   | 0.5452 | 1          | 0.5452 | 0 | 0 | 0 | 0.9286 Ref |
| ON392159 | Unassigned | Unassigned | Unassigned | 1095_0  | Clustered           | 16 VC_1095_0 | 16  | 0.458  | 1          | 0.458  | 0 | 0 | 0 | 1 Ref      |
| ON392160 | Unassigned | Unassigned | Unassigned | 761_0   | Clustered           | 67 VC_761_0  | 67  | 0.8947 | 1          | 0.8947 | 0 | 0 | 0 | 1 Ref      |
| ON392161 | Unassigned | Unassigned | Unassigned | 1344_0  | Clustered           | 78 VC_1344_0 | 78  | 0.9732 | 1          | 0.9732 | 0 | 0 | 0 | 1 Ref      |
| ON392162 | Unassigned | Unassigned | Unassigned | 761_0   | Clustered           | 67 VC_761_0  | 67  | 0.8947 | 1          | 0.8947 | 0 | 0 | 0 | 1 Ref      |
| ON392166 | Unassigned | Unassigned | Unassigned | 1037_0  | Clustered           | 6 VC_1037_0  | 6   | 0.6798 | 1          | 0.6798 | 0 | 0 | 0 | 1 Ref      |
| ON399185 | Unassigned | Unassigned | Unassigned | 132_1   | Clustered           | 17 VC_132_1  | 17  | 0.1738 | 1          | 0.1738 | 0 | 0 | 0 | 0.9853 Ref |



|          |            |            |            |        |                     |              |     |        |            |        |   |   |   |        |     |
|----------|------------|------------|------------|--------|---------------------|--------------|-----|--------|------------|--------|---|---|---|--------|-----|
| ON409568 | Unassigned | Unassigned | Unassigned | 637_0  | Clustered           | 115 VC_637_0 | 115 | 0.731  | 1          | 0.731  | 0 | 0 | 0 | 0.8764 | Ref |
| ON409569 | Unassigned | Unassigned | Unassigned | 637_0  | Clustered           | 115 VC_637_0 | 115 | 0.731  | 1          | 0.731  | 0 | 0 | 0 | 0.8764 | Ref |
| ON409570 | Unassigned | Unassigned | Unassigned | 637_0  | Clustered           | 115 VC_637_0 | 115 | 0.731  | 1          | 0.731  | 0 | 0 | 0 | 0.8764 | Ref |
| ON416862 | Unassigned | Unassigned | Unassigned | 40_0   | Clustered           | 5 VC_40_0    | 5   | 0.0844 | 0.99999995 | 0.0844 | 0 | 0 | 0 | 1      | Ref |
| ON454038 | Unassigned | Unassigned | Unassigned | 637_0  | Clustered           | 115 VC_637_0 | 115 | 0.731  | 1          | 0.731  | 0 | 0 | 0 | 0.8764 | Ref |
| ON456151 | Unassigned | Unassigned | Unassigned | 378_0  | Clustered           | 9 VC_378_0   | 9   | 0.7603 | 1          | 0.7603 | 0 | 0 | 0 | 1      | Ref |
| ON456330 | Unassigned | Unassigned | Unassigned | 371_13 | Clustered           | 33 VC_371_13 | 33  | 0.179  | 1          | 0.179  | 0 | 0 | 0 | 0.8769 | Ref |
| ON456331 | Unassigned | Unassigned | Unassigned | 868_0  | Clustered           | 25 VC_868_0  | 25  | 0.5791 | 1          | 0.5791 | 0 | 0 | 0 | 1      | Ref |
| ON456332 | Unassigned | Unassigned | Unassigned | 371_12 | Clustered           | 4 VC_371_12  | 4   | 0.0126 | 0.99998489 | 0.0126 | 0 | 0 | 0 | 0.8333 | Ref |
| ON456333 | Unassigned | Unassigned | Unassigned | 767_0  | Clustered           | 34 VC_767_0  | 34  | 0.9173 | 1          | 0.9173 | 0 | 0 | 0 | 1      | Ref |
| ON456334 | Unassigned | Unassigned | Unassigned | 557_1  | Clustered           | 11 VC_557_1  | 11  | 0.4945 | 1          | 0.4945 | 0 | 0 | 0 | 0.7818 | Ref |
| ON456335 | Unassigned | Unassigned | Unassigned | 1164_0 | Clustered           | 25 VC_1164_0 | 25  | 0.7312 | 1          | 0.7312 | 0 | 0 | 0 | 1      | Ref |
| ON456336 | Unassigned | Unassigned | Unassigned | 1093_0 | Clustered           | 40 VC_1093_0 | 40  | 0.8754 | 1          | 0.8754 | 0 | 0 | 0 | 1      | Ref |
| ON456337 | Unassigned | Unassigned | Unassigned | 1095_0 | Clustered           | 16 VC_1095_0 | 16  | 0.458  | 1          | 0.458  | 0 | 0 | 0 | 1      | Ref |
| ON456338 | Unassigned | Unassigned | Unassigned | 1353_0 | Clustered           | 10 VC_1353_0 | 10  | 1      | 1          | 1      | 0 | 0 | 0 | 1      | Ref |
| ON456339 | Unassigned | Unassigned | Unassigned | 236_0  | Clustered           | 72 VC_236_0  | 72  | 0.8104 | 1          | 0.8104 | 0 | 0 | 0 | 1      | Ref |
| ON456340 | Unassigned | Unassigned | Unassigned | 1164_0 | Clustered           | 25 VC_1164_0 | 25  | 0.7312 | 1          | 0.7312 | 0 | 0 | 0 | 1      | Ref |
| ON456342 | Unassigned | Unassigned | Unassigned | 371_0  | Clustered           | 2 VC_371_0   | 2   | 0.0032 | 0.94731972 | 0.003  | 0 | 0 | 0 | 1      | Ref |
| ON456343 | Unassigned | Unassigned | Unassigned | 1072_2 | Clustered           | 5 VC_1072_2  | 5   | 0.1003 | 0.99999315 | 0.1003 | 0 | 0 | 0 | 1      | Ref |
| ON456344 | Unassigned | Unassigned | Unassigned | 558_70 | Clustered/Singleton | 1 VC_558_70  | 1   | 0      | 1          | 0      | 0 | 0 | 0 | 1      | Ref |
| ON456345 | Unassigned | Unassigned | Unassigned | 551_7  | Clustered           | 28 VC_551_7  | 28  | 0.1661 | 1          | 0.1661 | 0 | 0 | 0 | 0.8519 | Ref |
| ON456346 | Unassigned | Unassigned | Unassigned | 1360_0 | Clustered           | 31 VC_1360_0 | 31  | 0.8837 | 1          | 0.8837 | 0 | 0 | 0 | 1      | Ref |
| ON456348 | Unassigned | Unassigned | Unassigned | 1353_0 | Clustered           | 10 VC_1353_0 | 10  | 1      | 1          | 1      | 0 | 0 | 0 | 1      | Ref |
| ON456349 | Unassigned | Unassigned | Unassigned | 1095_0 | Clustered           | 16 VC_1095_0 | 16  | 0.458  | 1          | 0.458  | 0 | 0 | 0 | 1      | Ref |
| ON456350 | Unassigned | Unassigned | Unassigned | 1344_0 | Clustered           | 78 VC_1344_0 | 78  | 0.9732 | 1          | 0.9732 | 0 | 0 | 0 | 1      | Ref |
| ON456351 | Unassigned | Unassigned | Unassigned | 237_2  | Clustered           | 11 VC_237_2  | 11  | 0.1409 | 1          | 0.1409 | 0 | 0 | 0 | 0.9818 | Ref |
| ON456352 | Unassigned | Unassigned | Unassigned | 410_0  | Clustered           | 7 VC_410_0   | 7   | 0.7905 | 1          | 0.7905 | 0 | 0 | 0 | 1      | Ref |
| ON456353 | Unassigned | Unassigned | Unassigned | 236_0  | Clustered           | 72 VC_236_0  | 72  | 0.8104 | 1          | 0.8104 | 0 | 0 | 0 | 1      | Ref |
| ON456354 | Unassigned | Unassigned | Unassigned | 1240_0 | Clustered           | 82 VC_1240_0 | 82  | 0.7945 | 1          | 0.7945 | 0 | 0 | 0 | 1      | Ref |
| ON456356 | Unassigned | Unassigned | Unassigned | 520_43 | Clustered           | 3 VC_520_43  | 3   | 0.0193 | 0.99837043 | 0.0193 | 0 | 0 | 0 | 1      | Ref |
| ON457554 | Unassigned | Unassigned | Unassigned | 837_0  | Clustered           | 29 VC_837_0  | 29  | 0.9955 | 1          | 0.9955 | 0 | 0 | 0 | 1      | Ref |
| ON457555 | Unassigned | Unassigned | Unassigned | 837_0  | Clustered           | 29 VC_837_0  | 29  | 0.9955 | 1          | 0.9955 | 0 | 0 | 0 | 1      | Ref |
| ON457556 | Unassigned | Unassigned | Unassigned | 837_0  | Clustered           | 29 VC_837_0  | 29  | 0.9955 | 1          | 0.9955 | 0 | 0 | 0 | 1      | Ref |
| ON457557 | Unassigned | Unassigned | Unassigned | 837_0  | Clustered           | 29 VC_837_0  | 29  | 0.9955 | 1          | 0.9955 | 0 | 0 | 0 | 1      | Ref |
| ON457558 | Unassigned | Unassigned | Unassigned | 614_0  | Clustered           | 5 VC_614_0   | 5   | 0.2395 | 0.99999997 | 0.2395 | 0 | 0 | 0 | 1      | Ref |
| ON457559 | Unassigned | Unassigned | Unassigned | 614_0  | Clustered           | 5 VC_614_0   | 5   | 0.2395 | 0.99999997 | 0.2395 | 0 | 0 | 0 | 1      | Ref |
| ON461912 | Unassigned | Unassigned | Unassigned | 452_0  | Clustered           | 66 VC_452_0  | 66  | 0.9248 | 1          | 0.9248 | 0 | 0 | 0 | 1      | Ref |
| ON464735 | Unassigned | Unassigned | Unassigned | 82_0   | Clustered           | 24 VC_82_0   | 24  | 0.7351 | 1          | 0.7351 | 0 | 0 | 0 | 1      | Ref |
| ON464736 | Unassigned | Unassigned | Unassigned | 82_0   | Clustered           | 24 VC_82_0   | 24  | 0.7351 | 1          | 0.7351 | 0 | 0 | 0 | 1      | Ref |
| ON464739 | Unassigned | Unassigned | Unassigned | 1474_0 | Clustered           | 3 VC_1474_0  | 3   | 1      | 0          | 0      | 0 | 0 | 0 | 1      | Ref |
| ON464760 | Unassigned | Unassigned | Unassigned | 713_0  | Clustered           | 3 VC_713_0   | 3   | 0.5082 | 0.99827116 | 0.5074 | 0 | 0 | 0 | 1      | Ref |
| ON464761 | Unassigned | Unassigned | Unassigned | 713_0  | Clustered           | 3 VC_713_0   | 3   | 0.5082 | 0.99827116 | 0.5074 | 0 | 0 | 0 | 1      | Ref |
| ON464762 | Unassigned | Unassigned | Unassigned | 713_0  | Clustered           | 3 VC_713_0   | 3   | 0.5082 | 0.99827116 | 0.5074 | 0 | 0 | 0 | 1      | Ref |
| ON464763 | Unassigned | Unassigned | Unassigned | 1474_0 | Clustered           | 3 VC_1474_0  | 3   | 1      | 0          | 0      | 0 | 0 | 0 | 1      | Ref |
| ON464764 | Unassigned | Unassigned | Unassigned | 1474_0 | Clustered           | 3 VC_1474_0  | 3   | 1      | 0          | 0      | 0 | 0 | 0 | 1      | Ref |
| ON470578 | Unassigned | Unassigned | Unassigned | 51_0   | Clustered           | 10 VC_51_0   | 10  | 0.1741 | 1          | 0.1741 | 0 | 0 | 0 | 1      | Ref |
| ON470579 | Unassigned | Unassigned | Unassigned | 242_1  | Clustered           | 20 VC_242_1  | 20  | 0.684  | 1          | 0.684  | 0 | 0 | 0 | 0.8368 | Ref |
| ON470580 | Unassigned | Unassigned | Unassigned | 245_0  | Clustered           | 10 VC_245_0  | 10  | 0.1805 | 1          | 0.1805 | 0 | 0 | 0 | 0.9778 | Ref |
| ON470582 | Unassigned | Unassigned | Unassigned | 242_1  | Clustered           | 20 VC_242_1  | 20  | 0.684  | 1          | 0.684  | 0 | 0 | 0 | 0.8368 | Ref |
| ON470583 | Unassigned | Unassigned | Unassigned | 245_0  | Clustered           | 10 VC_245_0  | 10  | 0.1805 | 1          | 0.1805 | 0 | 0 | 0 | 0.9778 | Ref |
| ON470584 | Unassigned | Unassigned | Unassigned | 45_0   | Clustered           | 12 VC_45_0   | 12  | 0.35   | 1          | 0.35   | 0 | 0 | 0 | 1      | Ref |
| ON470586 | Unassigned | Unassigned | Unassigned | 245_0  | Clustered           | 10 VC_245_0  | 10  | 0.1805 | 1          | 0.1805 | 0 | 0 | 0 | 0.9778 | Ref |
| ON470588 | Unassigned | Unassigned | Unassigned | 242_1  | Clustered           | 20 VC_242_1  | 20  | 0.684  | 1          | 0.684  | 0 | 0 | 0 | 0.8368 | Ref |
| ON470589 | Unassigned | Unassigned | Unassigned | 30_1   | Clustered           | 16 VC_30_1   | 16  | 0.1973 | 1          | 0.1973 | 0 | 0 | 0 | 0.8333 | Ref |
| ON470591 | Unassigned | Unassigned | Unassigned | 710_0  | Clustered           | 10 VC_710_0  | 10  | 0.2446 | 1          | 0.2446 | 0 | 0 | 0 | 0.8222 | Ref |
| ON470593 | Unassigned | Unassigned | Unassigned | 242_1  | Clustered           | 20 VC_242_1  | 20  | 0.684  | 1          | 0.684  | 0 | 0 | 0 | 0.8368 | Ref |
| ON470594 | Unassigned | Unassigned | Unassigned | 30_1   | Clustered           | 16 VC_30_1   | 16  | 0.1973 | 1          | 0.1973 | 0 | 0 | 0 | 0.8333 | Ref |
| ON470596 | Unassigned | Unassigned | Unassigned | 57_0   | Clustered           | 4 VC_57_0    | 4   | 0.4183 | 0.99998673 | 0.4183 | 0 | 0 | 0 | 1      | Ref |
| ON470597 | Unassigned | Unassigned | Unassigned | 41_0   | Clustered           | 16 VC_41_0   | 16  | 0.2025 | 1          | 0.2025 | 0 | 0 | 0 | 0.9667 | Ref |
| ON470598 | Unassigned | Unassigned | Unassigned | 51_0   | Clustered           | 10 VC_51_0   | 10  | 0.1741 | 1          | 0.1741 | 0 | 0 | 0 | 1      | Ref |
| ON470600 | Unassigned | Unassigned | Unassigned | 245_0  | Clustered           | 10 VC_245_0  | 10  | 0.1805 | 1          | 0.1805 | 0 | 0 | 0 | 0.9778 | Ref |
| ON470601 | Unassigned | Unassigned | Unassigned | 228_0  | Clustered           | 60 VC_228_0  | 60  | 0.942  | 1          | 0.942  | 0 | 0 | 0 | 1      | Ref |
| ON470603 | Unassigned | Unassigned | Unassigned | 45_0   | Clustered           | 12 VC_45_0   | 12  | 0.35   | 1          | 0.35   | 0 | 0 | 0 | 1      | Ref |
| ON470604 | Unassigned | Unassigned | Unassigned | 57_0   | Clustered           | 4 VC_57_0    | 4   | 0.4183 | 0.99998673 | 0.4183 | 0 | 0 | 0 | 1      | Ref |
| ON470605 | Unassigned | Unassigned | Unassigned | 30_1   | Clustered           | 16 VC_30_1   | 16  | 0.1973 | 1          | 0.1973 | 0 | 0 | 0 | 0.8333 | Ref |
| ON470606 | Unassigned | Unassigned | Unassigned | 228_0  | Clustered           | 60 VC_228_0  | 60  | 0.942  | 1          | 0.942  | 0 | 0 | 0 | 1      | Ref |
| ON470607 | Unassigned | Unassigned | Unassigned | 245_0  | Clustered           | 10 VC_245_0  | 10  | 0.1805 | 1          | 0.1805 | 0 | 0 | 0 | 0.9778 | Ref |
| ON470612 | Unassigned | Unassigned | Unassigned | 245_0  | Clustered           | 10 VC_245_0  | 10  | 0.1805 | 1          | 0.1805 | 0 | 0 | 0 | 0.9778 | Ref |
| ON470613 | Unassigned | Unassigned | Unassigned | 228_0  | Clustered           | 60 VC_228_0  | 60  | 0.942  | 1          | 0.942  | 0 | 0 | 0 | 1      | Ref |
| ON470615 | Unassigned | Unassigned | Unassigned | 247_0  | Clustered           | 14 VC_247_0  | 14  | 0.9119 | 1          | 0.9119 | 0 | 0 | 0 | 0.967  | Ref |
| ON470617 | Unassigned | Unassigned | Unassigned | 247_0  | Clustered           | 14 VC_247_0  | 14  | 0.9119 | 1          | 0.9119 | 0 | 0 | 0 | 0.967  | Ref |
| ON470618 | Unassigned | Unassigned | Unassigned | 51_0   | Clustered           | 10 VC_51_0   | 10  | 0.1741 | 1          | 0.1741 | 0 | 0 | 0 | 1      | Ref |
| ON470620 | Unassigned | Unassigned | Unassigned | 6_0    | Clustered           | 44 VC_6_0    | 44  | 0.908  | 1          | 0.908  | 0 | 0 | 0 | 1      | Ref |
| ON470621 | Unassigned | Unassigned | Unassigned | 245_0  | Clustered           | 10 VC_245_0  | 10  | 0.1805 | 1          | 0.1805 | 0 | 0 | 0 | 0.9778 | Ref |
| ON470624 | Unassigned | Unassigned | Unassigned | 57_0   | Clustered           | 4 VC_57_0    | 4   | 0.4183 | 0.99998673 | 0.4183 | 0 | 0 | 0 | 1      | Ref |
| ON470625 | Unassigned | Unassigned | Unassigned | 41_0   | Clustered           | 16 VC_41_0   | 16  | 0.2025 | 1          | 0.2025 | 0 | 0 | 0 | 0.9667 | Ref |
| ON470627 | Unassigned | Unassigned | Unassigned | 57_0   | Clustered           | 4 VC_57_0    | 4   | 0.4183 | 0.99998673 | 0.4183 | 0 | 0 | 0 | 1      | Ref |
| ON480525 | Unassigned | Unassigned | Unassigned | 698_0  | Clustered           | 26 VC_698_0  | 26  | 0.9366 | 1          | 0.9366 | 0 | 0 | 0 | 1      | Ref |
| ON489264 | Unassigned | Unassigned | Unassigned | 938_0  | Clustered           | 99 VC_938_0  | 99  | 0.9119 | 1          | 0.9119 | 0 | 0 | 0 | 0.9928 | Ref |
| ONS06924 | Unassigned | Unassigned | Unassigned | 283_96 | Clustered/Singleton | 1 VC_283_96  | 1   | 0      | 1          | 0      | 0 | 0 | 0 | 1      | Ref |
| ONS06926 | Unassigned | Unassigned | Unassigned | 691_0  | Clustered           | 2 VC_691_0   | 2   | 0.1052 | 0.95343038 | 0.1003 | 0 | 0 | 0 | 1      | Ref |



|          |            |            |            |         |                     |              |     |        |            |        |   |   |   |            |
|----------|------------|------------|------------|---------|---------------------|--------------|-----|--------|------------|--------|---|---|---|------------|
| ONS06927 | Unassigned | Unassigned | Unassigned | 92_0    | Clustered           | 22 VC_92_0   | 22  | 0.5639 | 1          | 0.5639 | 0 | 0 | 0 | 1 Ref      |
| ONS06928 | Unassigned | Unassigned | Unassigned | 92_0    | Clustered           | 22 VC_92_0   | 22  | 0.5639 | 1          | 0.5639 | 0 | 0 | 0 | 1 Ref      |
| ONS13429 | Unassigned | Unassigned | Unassigned | 699_0   | Clustered           | 71 VC_699_0  | 71  | 0.9352 | 1          | 0.9352 | 0 | 0 | 0 | 1 Ref      |
| ONS15458 | Unassigned | Unassigned | Unassigned | 668_0   | Clustered           | 25 VC_668_0  | 25  | 0.5539 | 1          | 0.5539 | 0 | 0 | 0 | 0.96 Ref   |
| ONS26838 | Unassigned | Unassigned | Unassigned | 637_0   | Clustered           | 115 VC_637_0 | 115 | 0.731  | 1          | 0.731  | 0 | 0 | 0 | 0.8764 Ref |
| ONS26839 | Unassigned | Unassigned | Unassigned | 452_0   | Clustered           | 66 VC_452_0  | 66  | 0.9248 | 1          | 0.9248 | 0 | 0 | 0 | 1 Ref      |
| ONS26840 | Unassigned | Unassigned | Unassigned | 191_32  | Clustered           | 12 VC_191_32 | 12  | 0.0683 | 1          | 0.0683 | 0 | 0 | 0 | 0.7576 Ref |
| ONS26969 | Unassigned | Unassigned | Unassigned | 1031_0  | Clustered           | 4 VC_1031_0  | 4   | 0.7884 | 0.99997621 | 0.7884 | 0 | 0 | 0 | 1 Ref      |
| ONS26970 | Unassigned | Unassigned | Unassigned | 981_0   | Clustered           | 3 VC_981_0   | 3   | 0.0531 | 0.99853685 | 0.053  | 0 | 0 | 0 | 1 Ref      |
| ONS26971 | Unassigned | Unassigned | Unassigned | 799_1   | Clustered           | 27 VC_799_1  | 27  | 0.8611 | 1          | 0.8611 | 0 | 0 | 0 | 1 Ref      |
| ONS26972 | Unassigned | Unassigned | Unassigned | 1163_0  | Clustered           | 28 VC_1163_0 | 28  | 0.4923 | 1          | 0.4923 | 0 | 0 | 0 | 1 Ref      |
| ONS26973 | Unassigned | Unassigned | Unassigned | 866_0   | Clustered           | 4 VC_866_0   | 4   | 0.0795 | 0.99998595 | 0.0795 | 0 | 0 | 0 | 1 Ref      |
| ONS26974 | Unassigned | Unassigned | Unassigned | 981_0   | Clustered           | 3 VC_981_0   | 3   | 0.0531 | 0.99853685 | 0.053  | 0 | 0 | 0 | 1 Ref      |
| ONS26975 | Unassigned | Unassigned | Unassigned | 867_0   | Clustered           | 6 VC_867_0   | 6   | 0.3202 | 1          | 0.3202 | 0 | 0 | 0 | 1 Ref      |
| ONS26976 | Unassigned | Unassigned | Unassigned | 520_30  | Clustered           | 2 VC_520_30  | 2   | 0.0073 | 0.9544492  | 0.0069 | 0 | 0 | 0 | 1 Ref      |
| ONS26977 | Unassigned | Unassigned | Unassigned | 1343_0  | Clustered           | 21 VC_1343_0 | 21  | 0.9843 | 1          | 0.9843 | 0 | 0 | 0 | 1 Ref      |
| ONS26978 | Unassigned | Unassigned | Unassigned | 234_0   | Clustered           | 21 VC_234_0  | 21  | 0.8355 | 1          | 0.8355 | 0 | 0 | 0 | 1 Ref      |
| ONS26979 | Unassigned | Unassigned | Unassigned | 975_0   | Clustered           | 11 VC_975_0  | 11  | 0.9687 | 1          | 0.9687 | 0 | 0 | 0 | 1 Ref      |
| ONS26980 | Unassigned | Unassigned | Unassigned | 1361_0  | Clustered           | 6 VC_1361_0  | 6   | 0.2371 | 1          | 0.2371 | 0 | 0 | 0 | 1 Ref      |
| ONS26981 | Unassigned | Unassigned | Unassigned | 557_1   | Clustered           | 11 VC_557_1  | 11  | 0.4945 | 1          | 0.4945 | 0 | 0 | 0 | 0.7818 Ref |
| ONS26982 | Unassigned | Unassigned | Unassigned | 558_14  | Clustered           | 8 VC_558_14  | 8   | 0.0228 | 0.99945246 | 0.0228 | 0 | 0 | 0 | 0.8214 Ref |
| ONS26984 | Unassigned | Unassigned | Unassigned | 236_0   | Clustered           | 72 VC_236_0  | 72  | 0.8104 | 1          | 0.8104 | 0 | 0 | 0 | 1 Ref      |
| ONS26985 | Unassigned | Unassigned | Unassigned | 982_0   | Clustered           | 62 VC_982_0  | 62  | 0.8646 | 1          | 0.8646 | 0 | 0 | 0 | 0.743 Ref  |
| ONS28715 | Unassigned | Unassigned | Unassigned | 392_0   | Clustered           | 126 VC_392_0 | 126 | 0.9621 | 1          | 0.9621 | 0 | 0 | 0 | 1 Ref      |
| ONS28716 | Unassigned | Unassigned | Unassigned | 392_0   | Clustered           | 126 VC_392_0 | 126 | 0.9621 | 1          | 0.9621 | 0 | 0 | 0 | 1 Ref      |
| ONS28717 | Unassigned | Unassigned | Unassigned | 392_0   | Clustered           | 126 VC_392_0 | 126 | 0.9621 | 1          | 0.9621 | 0 | 0 | 0 | 1 Ref      |
| ONS28718 | Unassigned | Unassigned | Unassigned | 941_0   | Clustered           | 40 VC_941_0  | 40  | 0.6903 | 1          | 0.6903 | 0 | 0 | 0 | 1 Ref      |
| ONS28719 | Unassigned | Unassigned | Unassigned | 392_0   | Clustered           | 126 VC_392_0 | 126 | 0.9621 | 1          | 0.9621 | 0 | 0 | 0 | 1 Ref      |
| ONS28720 | Unassigned | Unassigned | Unassigned | 385_0   | Clustered           | 51 VC_385_0  | 51  | 0.8754 | 1          | 0.8754 | 0 | 0 | 0 | 1 Ref      |
| ONS28721 | Unassigned | Unassigned | Unassigned | 385_0   | Clustered           | 51 VC_385_0  | 51  | 0.8754 | 1          | 0.8754 | 0 | 0 | 0 | 1 Ref      |
| ONS28722 | Unassigned | Unassigned | Unassigned | 385_0   | Clustered           | 51 VC_385_0  | 51  | 0.8754 | 1          | 0.8754 | 0 | 0 | 0 | 1 Ref      |
| ONS28723 | Unassigned | Unassigned | Unassigned | 385_0   | Clustered           | 51 VC_385_0  | 51  | 0.8754 | 1          | 0.8754 | 0 | 0 | 0 | 1 Ref      |
| ONS28724 | Unassigned | Unassigned | Unassigned | 385_0   | Clustered           | 51 VC_385_0  | 51  | 0.8754 | 1          | 0.8754 | 0 | 0 | 0 | 1 Ref      |
| ONS28725 | Unassigned | Unassigned | Unassigned | 286_15  | Clustered           | 2 VC_286_15  | 2   | 0.0073 | 0.75626308 | 0.0055 | 0 | 0 | 0 | 1 Ref      |
| ONS28726 | Unassigned | Unassigned | Unassigned | 283_142 | Clustered           | 2 VC_283_142 | 2   | 0.0029 | 0.94283912 | 0.0027 | 0 | 0 | 0 | 1 Ref      |
| ONS28727 | Unassigned | Unassigned | Unassigned | 283_29  | Clustered/Singleton | 1 VC_283_29  | 1   | 0      | 1          | 0      | 0 | 0 | 0 | 1 Ref      |
| ONS28728 | Unassigned | Unassigned | Unassigned | 283_30  | Clustered/Singleton | 1 VC_283_30  | 1   | 0      | 1          | 0      | 0 | 0 | 0 | 1 Ref      |
| ONS28729 | Unassigned | Unassigned | Unassigned | 330_0   | Clustered           | 27 VC_330_0  | 27  | 0.5088 | 1          | 0.5088 | 0 | 0 | 0 | 0.8661 Ref |
| ONS28730 | Unassigned | Unassigned | Unassigned | 330_0   | Clustered           | 27 VC_330_0  | 27  | 0.5088 | 1          | 0.5088 | 0 | 0 | 0 | 0.8661 Ref |
| ONS28731 | Unassigned | Unassigned | Unassigned | 330_0   | Clustered           | 27 VC_330_0  | 27  | 0.5088 | 1          | 0.5088 | 0 | 0 | 0 | 0.8661 Ref |
| ONS28732 | Unassigned | Unassigned | Unassigned | 330_0   | Clustered           | 27 VC_330_0  | 27  | 0.5088 | 1          | 0.5088 | 0 | 0 | 0 | 0.8661 Ref |
| ONS28733 | Unassigned | Unassigned | Unassigned | 451_0   | Clustered           | 80 VC_451_0  | 80  | 0.9991 | 1          | 0.9991 | 0 | 0 | 0 | 1 Ref      |
| ONS28734 | Unassigned | Unassigned | Unassigned | 283_86  | Clustered/Singleton | 1 VC_283_86  | 1   | 0      | 1          | 0      | 0 | 0 | 0 | 1 Ref      |
| ONS28735 | Unassigned | Unassigned | Unassigned | 283_103 | Clustered/Singleton | 1 VC_283_103 | 1   | 0      | 1          | 0      | 0 | 0 | 0 | 1 Ref      |
| ONS28736 | Unassigned | Unassigned | Unassigned | 283_149 | Clustered/Singleton | 1 VC_283_149 | 1   | 0      | 1          | 0      | 0 | 0 | 0 | 1 Ref      |
| ONS28737 | Unassigned | Unassigned | Unassigned | 286_10  | Clustered           | 9 VC_286_10  | 9   | 0.0615 | 0.99999878 | 0.0615 | 0 | 0 | 0 | 0.6667 Ref |
| ONS28738 | Unassigned | Unassigned | Unassigned | 283_87  | Clustered/Singleton | 1 VC_283_87  | 1   | 0      | 1          | 0      | 0 | 0 | 0 | 1 Ref      |
| ONS28739 | Unassigned | Unassigned | Unassigned | 283_107 | Clustered/Singleton | 1 VC_283_107 | 1   | 0      | 1          | 0      | 0 | 0 | 0 | 1 Ref      |
| ONS28740 | Unassigned | Unassigned | Unassigned | 283_132 | Clustered/Singleton | 1 VC_283_132 | 1   | 0      | 1          | 0      | 0 | 0 | 0 | 1 Ref      |
| ONS28741 | Unassigned | Unassigned | Unassigned | 283_11  | Clustered/Singleton | 1 VC_283_11  | 1   | 0      | 1          | 0      | 0 | 0 | 0 | 1 Ref      |
| ONS28742 | Unassigned | Unassigned | Unassigned | 283_186 | Clustered/Singleton | 1 VC_283_186 | 1   | 0      | 1          | 0      | 0 | 0 | 0 | 1 Ref      |
| ONS28743 | Unassigned | Unassigned | Unassigned | 283_55  | Clustered/Singleton | 1 VC_283_55  | 1   | 0      | 1          | 0      | 0 | 0 | 0 | 1 Ref      |
| ONS28744 | Unassigned | Unassigned | Unassigned | 283_142 | Clustered           | 2 VC_283_142 | 2   | 0.0029 | 0.94283912 | 0.0027 | 0 | 0 | 0 | 1 Ref      |
| ONS28745 | Unassigned | Unassigned | Unassigned | 283_13  | Clustered/Singleton | 1 VC_283_13  | 1   | 0      | 1          | 0      | 0 | 0 | 0 | 1 Ref      |
| ONS28746 | Unassigned | Unassigned | Unassigned | 283_146 | Clustered/Singleton | 1 VC_283_146 | 1   | 0      | 1          | 0      | 0 | 0 | 0 | 1 Ref      |
| ONS28933 | Unassigned | Unassigned | Unassigned | 1207_0  | Clustered           | 29 VC_1207_0 | 29  | 0.8225 | 1          | 0.8225 | 0 | 0 | 0 | 1 Ref      |
| ONS28935 | Unassigned | Unassigned | Unassigned | 18_0    | Clustered           | 4 VC_18_0    | 4   | 0.9098 | 0.99982347 | 0.9096 | 0 | 0 | 0 | 1 Ref      |
| ONS29291 | Unassigned | Unassigned | Unassigned | 79_0    | Clustered           | 64 VC_79_0   | 64  | 0.4185 | 1          | 0.4185 | 0 | 0 | 0 | 0.7649 Ref |
| ONS29850 | Unassigned | Unassigned | Unassigned | 976_0   | Clustered           | 2 VC_976_0   | 2   | 0.0306 | 0.92749365 | 0.0284 | 0 | 0 | 0 | 1 Ref      |
| ONS29851 | Unassigned | Unassigned | Unassigned | 976_1   | Clustered           | 5 VC_976_1   | 5   | 0.1328 | 0.99999971 | 0.1328 | 0 | 0 | 0 | 0.9 Ref    |
| ONS29852 | Unassigned | Unassigned | Unassigned | 976_1   | Clustered           | 5 VC_976_1   | 5   | 0.1328 | 0.99999971 | 0.1328 | 0 | 0 | 0 | 0.9 Ref    |
| ONS29853 | Unassigned | Unassigned | Unassigned | 976_1   | Clustered           | 5 VC_976_1   | 5   | 0.1328 | 0.99999971 | 0.1328 | 0 | 0 | 0 | 0.9 Ref    |
| ONS29854 | Unassigned | Unassigned | Unassigned | 169_0   | Clustered           | 20 VC_169_0  | 20  | 0.7529 | 1          | 0.7529 | 0 | 0 | 0 | 1 Ref      |
| ONS29855 | Unassigned | Unassigned | Unassigned | 976_1   | Clustered           | 5 VC_976_1   | 5   | 0.1328 | 0.99999971 | 0.1328 | 0 | 0 | 0 | 0.9 Ref    |
| ONS29856 | Unassigned | Unassigned | Unassigned | 467_0   | Clustered           | 5 VC_467_0   | 5   | 0.6874 | 0.99999996 | 0.6874 | 0 | 0 | 0 | 1 Ref      |
| ONS29857 | Unassigned | Unassigned | Unassigned | 976_0   | Clustered           | 2 VC_976_0   | 2   | 0.0306 | 0.92749365 | 0.0284 | 0 | 0 | 0 | 1 Ref      |
| ONS29858 | Unassigned | Unassigned | Unassigned | 976_5   | Clustered/Singleton | 1 VC_976_5   | 1   | 0      | 1          | 0      | 0 | 0 | 0 | 1 Ref      |
| ONS29859 | Unassigned | Unassigned | Unassigned | 467_0   | Clustered           | 5 VC_467_0   | 5   | 0.6874 | 0.99999996 | 0.6874 | 0 | 0 | 0 | 1 Ref      |
| ONS29860 | Unassigned | Unassigned | Unassigned | 976_1   | Clustered           | 5 VC_976_1   | 5   | 0.1328 | 0.99999971 | 0.1328 | 0 | 0 | 0 | 0.9 Ref    |
| ONS29862 | Unassigned | Unassigned | Unassigned | 467_0   | Clustered           | 5 VC_467_0   | 5   | 0.6874 | 0.99999996 | 0.6874 | 0 | 0 | 0 | 1 Ref      |
| ONS29863 | Unassigned | Unassigned | Unassigned | 1434_0  | Clustered           | 2 VC_1434_0  | 2   | 0.8742 | 0.85557782 | 0.7479 | 0 | 0 | 0 | 1 Ref      |
| ONS29864 | Unassigned | Unassigned | Unassigned | 467_0   | Clustered           | 5 VC_467_0   | 5   | 0.6874 | 0.99999996 | 0.6874 | 0 | 0 | 0 | 1 Ref      |
| ONS29865 | Unassigned | Unassigned | Unassigned | 1475_0  | Clustered           | 2 VC_1475_0  | 2   | 1      | 1          | 1      | 0 | 0 | 0 | 1 Ref      |
| ONS29866 | Unassigned | Unassigned | Unassigned | 1475_0  | Clustered           | 2 VC_1475_0  | 2   | 1      | 1          | 1      | 0 | 0 | 0 | 1 Ref      |
| ONS29867 | Unassigned | Unassigned | Unassigned | 1434_0  | Clustered           | 2 VC_1434_0  | 2   | 0.8742 | 0.85557782 | 0.7479 | 0 | 0 | 0 | 1 Ref      |
| ONS29868 | Unassigned | Unassigned | Unassigned | 70_0    | Clustered           | 27 VC_70_0   | 27  | 0.5981 | 1          | 0.5981 | 0 | 0 | 0 | 0.9886 Ref |
| ONS40300 | Unassigned | Unassigned | Unassigned | 329_18  | Clustered           | 7 VC_329_18  | 7   | 0.0328 | 1          | 0.0328 | 0 | 0 | 0 | 0.8095 Ref |
| ONS40301 | Unassigned | Unassigned | Unassigned | 637_0   | Clustered           | 115 VC_637_0 | 115 | 0.731  | 1          | 0.731  | 0 | 0 | 0 | 0.8764 Ref |
| ONS48417 | Unassigned | Unassigned | Unassigned | 475_5   | Clustered           | 2 VC_475_5   | 2   | 0.0294 | 0.93987345 | 0.0276 | 0 | 0 | 0 | 1 Ref      |
| ONS48418 | Unassigned | Unassigned | Unassigned | 475_10  | Clustered           | 2 VC_475_10  | 2   | 0.0285 | 0.87721192 | 0.025  | 0 | 0 | 0 | 1 Ref      |
| ONS48419 | Unassigned | Unassigned | Unassigned | 475_5   | Clustered           | 2 VC_475_5   | 2   | 0.0294 | 0.93987345 | 0.0276 | 0 | 0 | 0 | 1 Ref      |



|          |            |            |            |        |                     |              |     |        |            |        |   |   |   |            |
|----------|------------|------------|------------|--------|---------------------|--------------|-----|--------|------------|--------|---|---|---|------------|
| ON548420 | Unassigned | Unassigned | Unassigned | 475_2  | Clustered           | 3 VC_475_2   | 3   | 0.0585 | 0.98883022 | 0.0578 | 0 | 0 | 0 | 1 Ref      |
| ON548421 | Unassigned | Unassigned | Unassigned | 475_9  | Clustered/Singleton | 1 VC_475_9   | 1   | 0      | 1          | 0      | 0 | 0 | 0 | 1 Ref      |
| ON548432 | Unassigned | Unassigned | Unassigned | 638_0  | Clustered           | 45 VC_638_0  | 45  | 0.7741 | 1          | 0.7741 | 0 | 0 | 0 | 1 Ref      |
| ON548433 | Unassigned | Unassigned | Unassigned | 451_0  | Clustered           | 80 VC_451_0  | 80  | 0.9991 | 1          | 0.9991 | 0 | 0 | 0 | 1 Ref      |
| ON550260 | Unassigned | Unassigned | Unassigned | 491_0  | Clustered           | 36 VC_491_0  | 36  | 0.5336 | 1          | 0.5336 | 0 | 0 | 0 | 0.9714 Ref |
| ON551388 | Unassigned | Unassigned | Unassigned | 558_75 | Clustered/Singleton | 1 VC_558_75  | 1   | 0      | 1          | 0      | 0 | 0 | 0 | 1 Ref      |
| ON556632 | Unassigned | Unassigned | Unassigned | 638_0  | Clustered           | 45 VC_638_0  | 45  | 0.7741 | 1          | 0.7741 | 0 | 0 | 0 | 1 Ref      |
| ON568193 | Unassigned | Unassigned | Unassigned | 392_0  | Clustered           | 126 VC_392_0 | 126 | 0.9621 | 1          | 0.9621 | 0 | 0 | 0 | 1 Ref      |
| ON568341 | Unassigned | Unassigned | Unassigned | 164_11 | Clustered           | 10 VC_164_11 | 10  | 0.1507 | 1          | 0.1507 | 0 | 0 | 0 | 0.9111 Ref |
| ON571554 | Unassigned | Unassigned | Unassigned | 823_0  | Clustered           | 124 VC_823_0 | 124 | 0.9492 | 1          | 0.9492 | 0 | 0 | 0 | 1 Ref      |
| ON571632 | Unassigned | Unassigned | Unassigned | 12_2   | Clustered           | 19 VC_12_2   | 19  | 0.2018 | 1          | 0.2018 | 0 | 0 | 0 | 1 Ref      |
| ON602723 | Unassigned | Unassigned | Unassigned | 111_0  | Clustered           | 91 VC_111_0  | 91  | 0.9587 | 1          | 0.9587 | 0 | 0 | 0 | 1 Ref      |
| ON602724 | Unassigned | Unassigned | Unassigned | 111_0  | Clustered           | 91 VC_111_0  | 91  | 0.9587 | 1          | 0.9587 | 0 | 0 | 0 | 1 Ref      |
| ON602725 | Unassigned | Unassigned | Unassigned | 111_0  | Clustered           | 91 VC_111_0  | 91  | 0.9587 | 1          | 0.9587 | 0 | 0 | 0 | 1 Ref      |
| ON602726 | Unassigned | Unassigned | Unassigned | 111_0  | Clustered           | 91 VC_111_0  | 91  | 0.9587 | 1          | 0.9587 | 0 | 0 | 0 | 1 Ref      |
| ON602727 | Unassigned | Unassigned | Unassigned | 111_0  | Clustered           | 91 VC_111_0  | 91  | 0.9587 | 1          | 0.9587 | 0 | 0 | 0 | 1 Ref      |
| ON602728 | Unassigned | Unassigned | Unassigned | 111_0  | Clustered           | 91 VC_111_0  | 91  | 0.9587 | 1          | 0.9587 | 0 | 0 | 0 | 1 Ref      |
| ON602729 | Unassigned | Unassigned | Unassigned | 582_3  | Clustered           | 12 VC_582_3  | 12  | 0.2357 | 1          | 0.2357 | 0 | 0 | 0 | 0.8636 Ref |
| ON602730 | Unassigned | Unassigned | Unassigned | 460_0  | Clustered           | 19 VC_460_0  | 19  | 0.3744 | 1          | 0.3744 | 0 | 0 | 0 | 1 Ref      |
| ON602732 | Unassigned | Unassigned | Unassigned | 111_0  | Clustered           | 91 VC_111_0  | 91  | 0.9587 | 1          | 0.9587 | 0 | 0 | 0 | 1 Ref      |
| ON602733 | Unassigned | Unassigned | Unassigned | 388_0  | Clustered           | 4 VC_388_0   | 4   | 0.0345 | 0.99998812 | 0.0345 | 0 | 0 | 0 | 1 Ref      |
| ON602734 | Unassigned | Unassigned | Unassigned | 836_0  | Clustered           | 9 VC_836_0   | 9   | 0.7733 | 1          | 0.7733 | 0 | 0 | 0 | 1 Ref      |
| ON602735 | Unassigned | Unassigned | Unassigned | 938_0  | Clustered           | 99 VC_938_0  | 99  | 0.9119 | 1          | 0.9119 | 0 | 0 | 0 | 0.9928 Ref |
| ON602736 | Unassigned | Unassigned | Unassigned | 582_3  | Clustered           | 12 VC_582_3  | 12  | 0.2357 | 1          | 0.2357 | 0 | 0 | 0 | 0.8636 Ref |
| ON602737 | Unassigned | Unassigned | Unassigned | 460_0  | Clustered           | 19 VC_460_0  | 19  | 0.3744 | 1          | 0.3744 | 0 | 0 | 0 | 1 Ref      |
| ON602738 | Unassigned | Unassigned | Unassigned | 460_0  | Clustered           | 19 VC_460_0  | 19  | 0.3744 | 1          | 0.3744 | 0 | 0 | 0 | 1 Ref      |
| ON602739 | Unassigned | Unassigned | Unassigned | 111_0  | Clustered           | 91 VC_111_0  | 91  | 0.9587 | 1          | 0.9587 | 0 | 0 | 0 | 1 Ref      |
| ON602740 | Unassigned | Unassigned | Unassigned | 111_0  | Clustered           | 91 VC_111_0  | 91  | 0.9587 | 1          | 0.9587 | 0 | 0 | 0 | 1 Ref      |
| ON602741 | Unassigned | Unassigned | Unassigned | 938_0  | Clustered           | 99 VC_938_0  | 99  | 0.9119 | 1          | 0.9119 | 0 | 0 | 0 | 0.9928 Ref |
| ON602742 | Unassigned | Unassigned | Unassigned | 823_0  | Clustered           | 124 VC_823_0 | 124 | 0.9492 | 1          | 0.9492 | 0 | 0 | 0 | 1 Ref      |
| ON602743 | Unassigned | Unassigned | Unassigned | 111_0  | Clustered           | 91 VC_111_0  | 91  | 0.9587 | 1          | 0.9587 | 0 | 0 | 0 | 1 Ref      |
| ON602744 | Unassigned | Unassigned | Unassigned | 460_0  | Clustered           | 19 VC_460_0  | 19  | 0.3744 | 1          | 0.3744 | 0 | 0 | 0 | 1 Ref      |
| ON602746 | Unassigned | Unassigned | Unassigned | 1049_0 | Clustered           | 8 VC_1049_0  | 8   | 0.6413 | 1          | 0.6413 | 0 | 0 | 0 | 1 Ref      |
| ON602747 | Unassigned | Unassigned | Unassigned | 836_0  | Clustered           | 9 VC_836_0   | 9   | 0.7733 | 1          | 0.7733 | 0 | 0 | 0 | 1 Ref      |
| ON602748 | Unassigned | Unassigned | Unassigned | 111_0  | Clustered           | 91 VC_111_0  | 91  | 0.9587 | 1          | 0.9587 | 0 | 0 | 0 | 1 Ref      |
| ON602749 | Unassigned | Unassigned | Unassigned | 779_0  | Clustered           | 37 VC_779_0  | 37  | 0.5682 | 1          | 0.5682 | 0 | 0 | 0 | 1 Ref      |
| ON602750 | Unassigned | Unassigned | Unassigned | 938_0  | Clustered           | 99 VC_938_0  | 99  | 0.9119 | 1          | 0.9119 | 0 | 0 | 0 | 0.9928 Ref |
| ON602751 | Unassigned | Unassigned | Unassigned | 779_0  | Clustered           | 37 VC_779_0  | 37  | 0.5682 | 1          | 0.5682 | 0 | 0 | 0 | 1 Ref      |
| ON602752 | Unassigned | Unassigned | Unassigned | 111_0  | Clustered           | 91 VC_111_0  | 91  | 0.9587 | 1          | 0.9587 | 0 | 0 | 0 | 1 Ref      |
| ON602753 | Unassigned | Unassigned | Unassigned | 823_0  | Clustered           | 124 VC_823_0 | 124 | 0.9492 | 1          | 0.9492 | 0 | 0 | 0 | 1 Ref      |
| ON602754 | Unassigned | Unassigned | Unassigned | 111_0  | Clustered           | 91 VC_111_0  | 91  | 0.9587 | 1          | 0.9587 | 0 | 0 | 0 | 1 Ref      |
| ON602755 | Unassigned | Unassigned | Unassigned | 823_0  | Clustered           | 124 VC_823_0 | 124 | 0.9492 | 1          | 0.9492 | 0 | 0 | 0 | 1 Ref      |
| ON602756 | Unassigned | Unassigned | Unassigned | 111_0  | Clustered           | 91 VC_111_0  | 91  | 0.9587 | 1          | 0.9587 | 0 | 0 | 0 | 1 Ref      |
| ON602757 | Unassigned | Unassigned | Unassigned | 111_0  | Clustered           | 91 VC_111_0  | 91  | 0.9587 | 1          | 0.9587 | 0 | 0 | 0 | 1 Ref      |
| ON602758 | Unassigned | Unassigned | Unassigned | 123_0  | Clustered           | 23 VC_123_0  | 23  | 0.817  | 1          | 0.817  | 0 | 0 | 0 | 1 Ref      |
| ON602759 | Unassigned | Unassigned | Unassigned | 460_0  | Clustered           | 19 VC_460_0  | 19  | 0.3744 | 1          | 0.3744 | 0 | 0 | 0 | 1 Ref      |
| ON602760 | Unassigned | Unassigned | Unassigned | 460_0  | Clustered           | 19 VC_460_0  | 19  | 0.3744 | 1          | 0.3744 | 0 | 0 | 0 | 1 Ref      |
| ON602761 | Unassigned | Unassigned | Unassigned | 111_0  | Clustered           | 91 VC_111_0  | 91  | 0.9587 | 1          | 0.9587 | 0 | 0 | 0 | 1 Ref      |
| ON602762 | Unassigned | Unassigned | Unassigned | 111_0  | Clustered           | 91 VC_111_0  | 91  | 0.9587 | 1          | 0.9587 | 0 | 0 | 0 | 1 Ref      |
| ON602763 | Unassigned | Unassigned | Unassigned | 452_0  | Clustered           | 66 VC_452_0  | 66  | 0.9248 | 1          | 0.9248 | 0 | 0 | 0 | 1 Ref      |
| ON602764 | Unassigned | Unassigned | Unassigned | 452_0  | Clustered           | 66 VC_452_0  | 66  | 0.9248 | 1          | 0.9248 | 0 | 0 | 0 | 1 Ref      |
| ON602765 | Unassigned | Unassigned | Unassigned | 452_0  | Clustered           | 66 VC_452_0  | 66  | 0.9248 | 1          | 0.9248 | 0 | 0 | 0 | 1 Ref      |
| ON602766 | Unassigned | Unassigned | Unassigned | 836_0  | Clustered           | 9 VC_836_0   | 9   | 0.7733 | 1          | 0.7733 | 0 | 0 | 0 | 1 Ref      |
| ON602767 | Unassigned | Unassigned | Unassigned | 111_0  | Clustered           | 91 VC_111_0  | 91  | 0.9587 | 1          | 0.9587 | 0 | 0 | 0 | 1 Ref      |
| ON630910 | Unassigned | Unassigned | Unassigned | 490_1  | Clustered           | 5 VC_490_1   | 5   | 0.0447 | 0.99999996 | 0.0447 | 0 | 0 | 0 | 1 Ref      |
| ON631220 | Unassigned | Unassigned | Unassigned | 344_0  | Clustered           | 21 VC_344_0  | 21  | 0.5436 | 1          | 0.5436 | 0 | 0 | 0 | 1 Ref      |
| ON637170 | Unassigned | Unassigned | Unassigned | 192_0  | Clustered           | 15 VC_192_0  | 15  | 0.5071 | 1          | 0.5071 | 0 | 0 | 0 | 1 Ref      |
| ON637248 | Unassigned | Unassigned | Unassigned | 97_0   | Clustered           | 5 VC_97_0    | 5   | 0.0696 | 0.98113835 | 0.0683 | 0 | 0 | 0 | 1 Ref      |
| ON637250 | Unassigned | Unassigned | Unassigned | 451_0  | Clustered           | 80 VC_451_0  | 80  | 0.9991 | 1          | 0.9991 | 0 | 0 | 0 | 1 Ref      |
| ON637251 | Unassigned | Unassigned | Unassigned | 461_0  | Clustered           | 96 VC_461_0  | 96  | 0.9307 | 1          | 0.9307 | 0 | 0 | 0 | 0.9575 Ref |
| ON637759 | Unassigned | Unassigned | Unassigned | 761_0  | Clustered           | 67 VC_761_0  | 67  | 0.8947 | 1          | 0.8947 | 0 | 0 | 0 | 1 Ref      |
| ON637760 | Unassigned | Unassigned | Unassigned | 519_0  | Clustered           | 39 VC_519_0  | 39  | 0.8156 | 1          | 0.8156 | 0 | 0 | 0 | 1 Ref      |
| ON637761 | Unassigned | Unassigned | Unassigned | 1093_0 | Clustered           | 40 VC_1093_0 | 40  | 0.8754 | 1          | 0.8754 | 0 | 0 | 0 | 1 Ref      |
| ON637762 | Unassigned | Unassigned | Unassigned | 954_0  | Clustered           | 13 VC_954_0  | 13  | 0.863  | 1          | 0.863  | 0 | 0 | 0 | 1 Ref      |
| ON637763 | Unassigned | Unassigned | Unassigned | 954_0  | Clustered           | 13 VC_954_0  | 13  | 0.863  | 1          | 0.863  | 0 | 0 | 0 | 1 Ref      |
| ON637764 | Unassigned | Unassigned | Unassigned | 558_19 | Clustered/Singleton | 1 VC_558_19  | 1   | 0      | 1          | 0      | 0 | 0 | 0 | 1 Ref      |
| ON637765 | Unassigned | Unassigned | Unassigned | 761_0  | Clustered           | 67 VC_761_0  | 67  | 0.8947 | 1          | 0.8947 | 0 | 0 | 0 | 1 Ref      |
| ON637766 | Unassigned | Unassigned | Unassigned | 761_0  | Clustered           | 67 VC_761_0  | 67  | 0.8947 | 1          | 0.8947 | 0 | 0 | 0 | 1 Ref      |
| ON637767 | Unassigned | Unassigned | Unassigned | 1343_0 | Clustered           | 21 VC_1343_0 | 21  | 0.9843 | 1          | 0.9843 | 0 | 0 | 0 | 1 Ref      |
| ON637768 | Unassigned | Unassigned | Unassigned | 558_14 | Clustered           | 8 VC_558_14  | 8   | 0.0228 | 0.99945246 | 0.0228 | 0 | 0 | 0 | 0.8214 Ref |
| ON637769 | Unassigned | Unassigned | Unassigned | 371_11 | Clustered           | 31 VC_371_11 | 31  | 0.0927 | 1          | 0.0927 | 0 | 0 | 0 | 0.7011 Ref |
| ON637770 | Unassigned | Unassigned | Unassigned | 1100_1 | Clustered           | 2 VC_1100_1  | 2   | 0.1223 | 0.94673154 | 0.1158 | 0 | 0 | 0 | 1 Ref      |
| ON637771 | Unassigned | Unassigned | Unassigned | 517_1  | Clustered           | 108 VC_517_1 | 108 | 0.8483 | 1          | 0.8483 | 0 | 0 | 0 | 0.9955 Ref |
| ON637772 | Unassigned | Unassigned | Unassigned | 939_0  | Clustered           | 15 VC_939_0  | 15  | 1      | 0          | 0      | 0 | 0 | 0 | 1 Ref      |
| ON642070 | Unassigned | Unassigned | Unassigned | 1_0    | Clustered           | 54 VC_1_0    | 54  | 0.8527 | 1          | 0.8527 | 0 | 0 | 0 | 1 Ref      |
| ON645337 | Unassigned | Unassigned | Unassigned | 761_0  | Clustered           | 67 VC_761_0  | 67  | 0.8947 | 1          | 0.8947 | 0 | 0 | 0 | 1 Ref      |
| ON645338 | Unassigned | Unassigned | Unassigned | 1164_0 | Clustered           | 25 VC_1164_0 | 25  | 0.7312 | 1          | 0.7312 | 0 | 0 | 0 | 1 Ref      |
| ON645339 | Unassigned | Unassigned | Unassigned | 1072_5 | Clustered           | 3 VC_1072_5  | 3   | 0.0475 | 0.98997321 | 0.047  | 0 | 0 | 0 | 1 Ref      |
| ON645341 | Unassigned | Unassigned | Unassigned | 1344_0 | Clustered           | 78 VC_1344_0 | 78  | 0.9732 | 1          | 0.9732 | 0 | 0 | 0 | 1 Ref      |
| ON645342 | Unassigned | Unassigned | Unassigned | 234_0  | Clustered           | 21 VC_234_0  | 21  | 0.8355 | 1          | 0.8355 | 0 | 0 | 0 | 1 Ref      |
| ON645343 | Unassigned | Unassigned | Unassigned | 1175_0 | Clustered           | 22 VC_1175_0 | 22  | 0.4562 | 1          | 0.4562 | 0 | 0 | 0 | 1 Ref      |



|          |            |            |            |         |                     |              |     |        |            |        |   |   |   |            |
|----------|------------|------------|------------|---------|---------------------|--------------|-----|--------|------------|--------|---|---|---|------------|
| ON645344 | Unassigned | Unassigned | Unassigned | 522_0   | Clustered           | 3 VC_522_0   | 3   | 0.0836 | 0.9985266  | 0.0835 | 0 | 0 | 0 | 1 Ref      |
| ON645345 | Unassigned | Unassigned | Unassigned | 1344_0  | Clustered           | 78 VC_1344_0 | 78  | 0.9732 | 1          | 0.9732 | 0 | 0 | 0 | 1 Ref      |
| ON645346 | Unassigned | Unassigned | Unassigned | 1034_0  | Clustered           | 2 VC_1034_0  | 2   | 0.071  | 0.95326364 | 0.0677 | 0 | 0 | 0 | 1 Ref      |
| ON645936 | Unassigned | Unassigned | Unassigned | 283_178 | Clustered/Singleton | 1 VC_283_178 | 1   | 0      | 1          | 0      | 0 | 0 | 0 | 1 Ref      |
| ON653033 | Unassigned | Unassigned | Unassigned | 77_0    | Clustered           | 20 VC_77_0   | 20  | 0.9657 | 1          | 0.9657 | 0 | 0 | 0 | 1 Ref      |
| ON677304 | Unassigned | Unassigned | Unassigned | 325_34  | Clustered/Singleton | 1 VC_325_34  | 1   | 0      | 1          | 0      | 0 | 0 | 0 | 1 Ref      |
| ON677538 | Unassigned | Unassigned | Unassigned | 778_0   | Clustered           | 4 VC_778_0   | 4   | 0.8115 | 0.99985435 | 0.8114 | 0 | 0 | 0 | 1 Ref      |
| ON687735 | Unassigned | Unassigned | Unassigned | 236_0   | Clustered           | 72 VC_236_0  | 72  | 0.8104 | 1          | 0.8104 | 0 | 0 | 0 | 1 Ref      |
| ON687736 | Unassigned | Unassigned | Unassigned | 236_0   | Clustered           | 72 VC_236_0  | 72  | 0.8104 | 1          | 0.8104 | 0 | 0 | 0 | 1 Ref      |
| ON690007 | Unassigned | Unassigned | Unassigned | 143_0   | Clustered           | 2 VC_143_0   | 2   | 0.1189 | 0.94995671 | 0.1129 | 0 | 0 | 0 | 1 Ref      |
| ON706965 | Unassigned | Unassigned | Unassigned | 328_0   | Clustered           | 11 VC_328_0  | 11  | 0.4707 | 1          | 0.4707 | 0 | 0 | 0 | 1 Ref      |
| ON711395 | Unassigned | Unassigned | Unassigned | 942_0   | Clustered           | 36 VC_942_0  | 36  | 0.7848 | 1          | 0.7848 | 0 | 0 | 0 | 1 Ref      |
| ON711490 | Unassigned | Unassigned | Unassigned | 316_0   | Clustered           | 3 VC_316_0   | 3   | 0.774  | 0.99820498 | 0.7726 | 0 | 0 | 0 | 1 Ref      |
| ON712643 | Unassigned | Unassigned | Unassigned | 849_7   | Clustered/Singleton | 1 VC_849_7   | 1   | 0      | 1          | 0      | 0 | 0 | 0 | 1 Ref      |
| ON714422 | Unassigned | Unassigned | Unassigned | 642_2   | Clustered           | 6 VC_642_2   | 6   | 0.1679 | 1          | 0.1679 | 0 | 0 | 0 | 1 Ref      |
| ON715521 | Unassigned | Unassigned | Unassigned | 387_0   | Clustered           | 3 VC_387_0   | 3   | 0.0424 | 0.99861589 | 0.0423 | 0 | 0 | 0 | 1 Ref      |
| ON720975 | Unassigned | Unassigned | Unassigned | 283_162 | Clustered/Singleton | 1 VC_283_162 | 1   | 0      | 1          | 0      | 0 | 0 | 0 | 1 Ref      |
| ON720976 | Unassigned | Unassigned | Unassigned | 540_0   | Clustered           | 15 VC_540_0  | 15  | 0.2866 | 1          | 0.2866 | 0 | 0 | 0 | 1 Ref      |
| ON720977 | Unassigned | Unassigned | Unassigned | 637_0   | Clustered           | 115 VC_637_0 | 115 | 0.731  | 1          | 0.731  | 0 | 0 | 0 | 0.8764 Ref |
| ON721384 | Unassigned | Unassigned | Unassigned | 1009_0  | Clustered           | 3 VC_1009_0  | 3   | 0.127  | 0.99814461 | 0.1267 | 0 | 0 | 0 | 1 Ref      |
| ON721385 | Unassigned | Unassigned | Unassigned | 1009_0  | Clustered           | 3 VC_1009_0  | 3   | 0.127  | 0.99814461 | 0.1267 | 0 | 0 | 0 | 1 Ref      |
| ON724008 | Unassigned | Unassigned | Unassigned | 1176_0  | Clustered           | 41 VC_1176_0 | 41  | 0.9558 | 1          | 0.9558 | 0 | 0 | 0 | 0.9976 Ref |
| ON724009 | Unassigned | Unassigned | Unassigned | 1184_0  | Clustered           | 5 VC_1184_0  | 5   | 0.6591 | 0.99999982 | 0.6591 | 0 | 0 | 0 | 1 Ref      |
| ON724010 | Unassigned | Unassigned | Unassigned | 744_0   | Clustered           | 10 VC_744_0  | 10  | 0.7049 | 1          | 0.7049 | 0 | 0 | 0 | 1 Ref      |
| ON724011 | Unassigned | Unassigned | Unassigned | 1176_0  | Clustered           | 41 VC_1176_0 | 41  | 0.9558 | 1          | 0.9558 | 0 | 0 | 0 | 0.9976 Ref |
| ON724012 | Unassigned | Unassigned | Unassigned | 1176_0  | Clustered           | 41 VC_1176_0 | 41  | 0.9558 | 1          | 0.9558 | 0 | 0 | 0 | 0.9976 Ref |
| ON724013 | Unassigned | Unassigned | Unassigned | 236_0   | Clustered           | 72 VC_236_0  | 72  | 0.8104 | 1          | 0.8104 | 0 | 0 | 0 | 1 Ref      |
| ON724014 | Unassigned | Unassigned | Unassigned | 1093_0  | Clustered           | 40 VC_1093_0 | 40  | 0.8754 | 1          | 0.8754 | 0 | 0 | 0 | 1 Ref      |
| ON724015 | Unassigned | Unassigned | Unassigned | 866_1   | Clustered           | 20 VC_866_1  | 20  | 0.4814 | 1          | 0.4814 | 0 | 0 | 0 | 1 Ref      |
| ON724016 | Unassigned | Unassigned | Unassigned | 225_0   | Clustered           | 32 VC_225_0  | 32  | 0.848  | 1          | 0.848  | 0 | 0 | 0 | 0.996 Ref  |
| ON724017 | Unassigned | Unassigned | Unassigned | 1036_0  | Clustered           | 11 VC_1036_0 | 11  | 0.656  | 1          | 0.656  | 0 | 0 | 0 | 0.8727 Ref |
| ON724018 | Unassigned | Unassigned | Unassigned | 1234_0  | Clustered           | 44 VC_1234_0 | 44  | 1      | 1          | 1      | 0 | 0 | 0 | 1 Ref      |
| ON754979 | Unassigned | Unassigned | Unassigned | 386_0   | Clustered           | 49 VC_386_0  | 49  | 0.7941 | 1          | 0.7941 | 0 | 0 | 0 | 1 Ref      |
| ON755181 | Unassigned | Unassigned | Unassigned | 889_0   | Clustered           | 16 VC_889_0  | 16  | 0.2969 | 1          | 0.2969 | 0 | 0 | 0 | 1 Ref      |
| ON755182 | Unassigned | Unassigned | Unassigned | 1344_0  | Clustered           | 78 VC_1344_0 | 78  | 0.9732 | 1          | 0.9732 | 0 | 0 | 0 | 1 Ref      |
| ON755183 | Unassigned | Unassigned | Unassigned | 1343_0  | Clustered           | 21 VC_1343_0 | 21  | 0.9843 | 1          | 0.9843 | 0 | 0 | 0 | 1 Ref      |
| ON755184 | Unassigned | Unassigned | Unassigned | 1096_0  | Clustered           | 5 VC_1096_0  | 5   | 0.8566 | 0.99869977 | 0.8555 | 0 | 0 | 0 | 1 Ref      |
| ON755185 | Unassigned | Unassigned | Unassigned | 572_0   | Clustered           | 16 VC_572_0  | 16  | 0.7286 | 1          | 0.7286 | 0 | 0 | 0 | 1 Ref      |
| ON755186 | Unassigned | Unassigned | Unassigned | 1095_0  | Clustered           | 16 VC_1095_0 | 16  | 0.458  | 1          | 0.458  | 0 | 0 | 0 | 1 Ref      |
| ON755187 | Unassigned | Unassigned | Unassigned | 572_0   | Clustered           | 16 VC_572_0  | 16  | 0.7286 | 1          | 0.7286 | 0 | 0 | 0 | 1 Ref      |
| ON755188 | Unassigned | Unassigned | Unassigned | 1344_0  | Clustered           | 78 VC_1344_0 | 78  | 0.9732 | 1          | 0.9732 | 0 | 0 | 0 | 1 Ref      |
| ON755189 | Unassigned | Unassigned | Unassigned | 558_16  | Clustered/Singleton | 1 VC_558_16  | 1   | 0      | 1          | 0      | 0 | 0 | 0 | 1 Ref      |
| ON758385 | Unassigned | Unassigned | Unassigned | 506_1   | Clustered/Singleton | 1 VC_506_1   | 1   | 0      | 1          | 0      | 0 | 0 | 0 | 1 Ref      |
| ON778007 | Unassigned | Unassigned | Unassigned | 297_0   | Clustered           | 5 VC_297_0   | 5   | 0.1056 | 0.99999993 | 0.1056 | 0 | 0 | 0 | 0.9 Ref    |
| ON778463 | Unassigned | Unassigned | Unassigned | 792_0   | Clustered           | 35 VC_792_0  | 35  | 0.9828 | 1          | 0.9828 | 0 | 0 | 0 | 1 Ref      |
| ON782130 | Unassigned | Unassigned | Unassigned | 228_0   | Clustered           | 60 VC_228_0  | 60  | 0.942  | 1          | 0.942  | 0 | 0 | 0 | 1 Ref      |
| ON782582 | Unassigned | Unassigned | Unassigned | 283_6   | Clustered/Singleton | 1 VC_283_6   | 1   | 0      | 1          | 0      | 0 | 0 | 0 | 1 Ref      |
| ON807605 | Unassigned | Unassigned | Unassigned | 123_0   | Clustered           | 23 VC_123_0  | 23  | 0.817  | 1          | 0.817  | 0 | 0 | 0 | 1 Ref      |
| ON809559 | Unassigned | Unassigned | Unassigned | 111_0   | Clustered           | 91 VC_111_0  | 91  | 0.9587 | 1          | 0.9587 | 0 | 0 | 0 | 1 Ref      |
| ON809560 | Unassigned | Unassigned | Unassigned | 123_0   | Clustered           | 23 VC_123_0  | 23  | 0.817  | 1          | 0.817  | 0 | 0 | 0 | 1 Ref      |
| ON814134 | Unassigned | Unassigned | Unassigned | 153_0   | Clustered           | 25 VC_153_0  | 25  | 0.7729 | 1          | 0.7729 | 0 | 0 | 0 | 1 Ref      |
| ON814135 | Unassigned | Unassigned | Unassigned | 153_0   | Clustered           | 25 VC_153_0  | 25  | 0.7729 | 1          | 0.7729 | 0 | 0 | 0 | 1 Ref      |
| ON814136 | Unassigned | Unassigned | Unassigned | 153_0   | Clustered           | 25 VC_153_0  | 25  | 0.7729 | 1          | 0.7729 | 0 | 0 | 0 | 1 Ref      |
| ON815901 | Unassigned | Unassigned | Unassigned | 838_0   | Clustered           | 29 VC_838_0  | 29  | 0.8611 | 1          | 0.8611 | 0 | 0 | 0 | 1 Ref      |
| ON815902 | Unassigned | Unassigned | Unassigned | 838_0   | Clustered           | 29 VC_838_0  | 29  | 0.8611 | 1          | 0.8611 | 0 | 0 | 0 | 1 Ref      |
| ON815903 | Unassigned | Unassigned | Unassigned | 838_0   | Clustered           | 29 VC_838_0  | 29  | 0.8611 | 1          | 0.8611 | 0 | 0 | 0 | 1 Ref      |
| ON843697 | Unassigned | Unassigned | Unassigned | 584_0   | Clustered           | 28 VC_584_0  | 28  | 0.7704 | 1          | 0.7704 | 0 | 0 | 0 | 1 Ref      |
| ON853583 | Unassigned | Unassigned | Unassigned | 125_0   | Clustered           | 17 VC_125_0  | 17  | 0.9244 | 1          | 0.9244 | 0 | 0 | 0 | 1 Ref      |
| ON856257 | Unassigned | Unassigned | Unassigned | 8_0     | Clustered           | 58 VC_8_0    | 58  | 0.8306 | 1          | 0.8306 | 0 | 0 | 0 | 0.9946 Ref |
| ON856258 | Unassigned | Unassigned | Unassigned | 8_0     | Clustered           | 58 VC_8_0    | 58  | 0.8306 | 1          | 0.8306 | 0 | 0 | 0 | 0.9946 Ref |
| ON857925 | Unassigned | Unassigned | Unassigned | 79_7    | Clustered           | 33 VC_79_7   | 33  | 0.216  | 1          | 0.216  | 0 | 0 | 0 | 0.8409 Ref |
| ON857926 | Unassigned | Unassigned | Unassigned | 423_0   | Clustered           | 45 VC_423_0  | 45  | 0.9484 | 1          | 0.9484 | 0 | 0 | 0 | 1 Ref      |
| ON857927 | Unassigned | Unassigned | Unassigned | 472_0   | Clustered           | 47 VC_472_0  | 47  | 0.9025 | 1          | 0.9025 | 0 | 0 | 0 | 1 Ref      |
| ON857928 | Unassigned | Unassigned | Unassigned | 423_0   | Clustered           | 45 VC_423_0  | 45  | 0.9484 | 1          | 0.9484 | 0 | 0 | 0 | 1 Ref      |
| ON857929 | Unassigned | Unassigned | Unassigned | 79_7    | Clustered           | 33 VC_79_7   | 33  | 0.216  | 1          | 0.216  | 0 | 0 | 0 | 0.8409 Ref |
| ON857930 | Unassigned | Unassigned | Unassigned | 79_0    | Clustered           | 64 VC_79_0   | 64  | 0.4185 | 1          | 0.4185 | 0 | 0 | 0 | 0.7649 Ref |
| ON857931 | Unassigned | Unassigned | Unassigned | 295_0   | Clustered           | 2 VC_295_0   | 2   | 0.0336 | 0.94464231 | 0.0317 | 0 | 0 | 0 | 1 Ref      |
| ON857932 | Unassigned | Unassigned | Unassigned | 755_0   | Clustered           | 9 VC_755_0   | 9   | 0.4489 | 1          | 0.4489 | 0 | 0 | 0 | 1 Ref      |
| ON857933 | Unassigned | Unassigned | Unassigned | 423_0   | Clustered           | 45 VC_423_0  | 45  | 0.9484 | 1          | 0.9484 | 0 | 0 | 0 | 1 Ref      |
| ON857934 | Unassigned | Unassigned | Unassigned | 79_0    | Clustered           | 64 VC_79_0   | 64  | 0.4185 | 1          | 0.4185 | 0 | 0 | 0 | 0.7649 Ref |
| ON857935 | Unassigned | Unassigned | Unassigned | 423_0   | Clustered           | 45 VC_423_0  | 45  | 0.9484 | 1          | 0.9484 | 0 | 0 | 0 | 1 Ref      |
| ON857936 | Unassigned | Unassigned | Unassigned | 472_0   | Clustered           | 47 VC_472_0  | 47  | 0.9025 | 1          | 0.9025 | 0 | 0 | 0 | 1 Ref      |
| ON857937 | Unassigned | Unassigned | Unassigned | 79_7    | Clustered           | 33 VC_79_7   | 33  | 0.216  | 1          | 0.216  | 0 | 0 | 0 | 0.8409 Ref |
| ON857938 | Unassigned | Unassigned | Unassigned | 79_7    | Clustered           | 33 VC_79_7   | 33  | 0.216  | 1          | 0.216  | 0 | 0 | 0 | 0.8409 Ref |
| ON857939 | Unassigned | Unassigned | Unassigned | 1028_0  | Clustered           | 8 VC_1028_0  | 8   | 0.9323 | 1          | 0.9323 | 0 | 0 | 0 | 1 Ref      |
| ON857940 | Unassigned | Unassigned | Unassigned | 176_1   | Clustered           | 2 VC_176_1   | 2   | 0.0363 | 0.95657568 | 0.0347 | 0 | 0 | 0 | 1 Ref      |
| ON857941 | Unassigned | Unassigned | Unassigned | 612_0   | Clustered           | 9 VC_612_0   | 9   | 0.9545 | 1          | 0.9545 | 0 | 0 | 0 | 1 Ref      |
| ON857942 | Unassigned | Unassigned | Unassigned | 79_0    | Clustered           | 64 VC_79_0   | 64  | 0.4185 | 1          | 0.4185 | 0 | 0 | 0 | 0.7649 Ref |
| ON857943 | Unassigned | Unassigned | Unassigned | 838_0   | Clustered           | 29 VC_838_0  | 29  | 0.8611 | 1          | 0.8611 | 0 | 0 | 0 | 1 Ref      |
| ON862890 | Unassigned | Unassigned | Unassigned | 131_1   | Clustered           | 6 VC_131_1   | 6   | 0.057  | 0.99999999 | 0.057  | 0 | 0 | 0 | 1 Ref      |
| ON864052 | Unassigned | Unassigned | Unassigned | 837_0   | Clustered           | 29 VC_837_0  | 29  | 0.9955 | 1          | 0.9955 | 0 | 0 | 0 | 1 Ref      |



|          |            |            |            |        |                     |              |     |        |            |        |   |   |   |            |
|----------|------------|------------|------------|--------|---------------------|--------------|-----|--------|------------|--------|---|---|---|------------|
| ON866946 | Unassigned | Unassigned | Unassigned | 153_0  | Clustered           | 25 VC_153_0  | 25  | 0.7729 | 1          | 0.7729 | 0 | 0 | 0 | 1 Ref      |
| ON868915 | Unassigned | Unassigned | Unassigned | 329_19 | Clustered/Singleton | 1 VC_329_19  | 1   | 0      | 1          | 0      | 0 | 0 | 0 | 1 Ref      |
| ON872379 | Unassigned | Unassigned | Unassigned | 837_0  | Clustered           | 29 VC_837_0  | 29  | 0.9955 | 1          | 0.9955 | 0 | 0 | 0 | 1 Ref      |
| ON880501 | Unassigned | Unassigned | Unassigned | 823_0  | Clustered           | 124 VC_823_0 | 124 | 0.9492 | 1          | 0.9492 | 0 | 0 | 0 | 1 Ref      |
| ON881243 | Unassigned | Unassigned | Unassigned | 475_3  | Clustered/Singleton | 1 VC_475_3   | 1   | 0      | 1          | 0      | 0 | 0 | 0 | 1 Ref      |
| ON881905 | Unassigned | Unassigned | Unassigned | 938_0  | Clustered           | 99 VC_938_0  | 99  | 0.9119 | 1          | 0.9119 | 0 | 0 | 0 | 0.9928 Ref |
| ON911538 | Unassigned | Unassigned | Unassigned | 749_0  | Clustered           | 40 VC_749_0  | 40  | 0.7517 | 1          | 0.7517 | 0 | 0 | 0 | 1 Ref      |
| ON911539 | Unassigned | Unassigned | Unassigned | 74_0   | Clustered           | 15 VC_74_0   | 15  | 0.5204 | 1          | 0.5204 | 0 | 0 | 0 | 1 Ref      |
| ON911540 | Unassigned | Unassigned | Unassigned | 465_0  | Clustered           | 7 VC_465_0   | 7   | 0.3322 | 1          | 0.3322 | 0 | 0 | 0 | 1 Ref      |
| ON911714 | Unassigned | Unassigned | Unassigned | 9_0    | Clustered           | 38 VC_9_0    | 38  | 0.4895 | 1          | 0.4895 | 0 | 0 | 0 | 1 Ref      |
| ON911715 | Unassigned | Unassigned | Unassigned | 9_0    | Clustered           | 38 VC_9_0    | 38  | 0.4895 | 1          | 0.4895 | 0 | 0 | 0 | 1 Ref      |
| ON911716 | Unassigned | Unassigned | Unassigned | 9_0    | Clustered           | 38 VC_9_0    | 38  | 0.4895 | 1          | 0.4895 | 0 | 0 | 0 | 1 Ref      |
| ON911717 | Unassigned | Unassigned | Unassigned | 9_0    | Clustered           | 38 VC_9_0    | 38  | 0.4895 | 1          | 0.4895 | 0 | 0 | 0 | 1 Ref      |
| ON911718 | Unassigned | Unassigned | Unassigned | 9_0    | Clustered           | 38 VC_9_0    | 38  | 0.4895 | 1          | 0.4895 | 0 | 0 | 0 | 1 Ref      |
| ON922917 | Unassigned | Unassigned | Unassigned | 916_0  | Clustered           | 4 VC_916_0   | 4   | 0.8472 | 0.99985574 | 0.8471 | 0 | 0 | 0 | 1 Ref      |
| ON922918 | Unassigned | Unassigned | Unassigned | 722_0  | Clustered           | 13 VC_722_0  | 13  | 0.5104 | 1          | 0.5104 | 0 | 0 | 0 | 1 Ref      |
| ON922919 | Unassigned | Unassigned | Unassigned | 779_0  | Clustered           | 37 VC_779_0  | 37  | 0.5682 | 1          | 0.5682 | 0 | 0 | 0 | 1 Ref      |
| ON922920 | Unassigned | Unassigned | Unassigned | 386_0  | Clustered           | 49 VC_386_0  | 49  | 0.7941 | 1          | 0.7941 | 0 | 0 | 0 | 1 Ref      |
| ON922990 | Unassigned | Unassigned | Unassigned | 493_9  | Clustered/Singleton | 1 VC_493_9   | 1   | 0      | 1          | 0      | 0 | 0 | 0 | 1 Ref      |
| ON932078 | Unassigned | Unassigned | Unassigned | 74_0   | Clustered           | 15 VC_74_0   | 15  | 0.5204 | 1          | 0.5204 | 0 | 0 | 0 | 1 Ref      |
| ON932079 | Unassigned | Unassigned | Unassigned | 169_0  | Clustered           | 20 VC_169_0  | 20  | 0.7529 | 1          | 0.7529 | 0 | 0 | 0 | 1 Ref      |
| ON932080 | Unassigned | Unassigned | Unassigned | 169_0  | Clustered           | 20 VC_169_0  | 20  | 0.7529 | 1          | 0.7529 | 0 | 0 | 0 | 1 Ref      |
| ON932081 | Unassigned | Unassigned | Unassigned | 74_0   | Clustered           | 15 VC_74_0   | 15  | 0.5204 | 1          | 0.5204 | 0 | 0 | 0 | 1 Ref      |
| ON932082 | Unassigned | Unassigned | Unassigned | 749_0  | Clustered           | 40 VC_749_0  | 40  | 0.7517 | 1          | 0.7517 | 0 | 0 | 0 | 1 Ref      |
| ON932083 | Unassigned | Unassigned | Unassigned | 74_0   | Clustered           | 15 VC_74_0   | 15  | 0.5204 | 1          | 0.5204 | 0 | 0 | 0 | 1 Ref      |
| ON932084 | Unassigned | Unassigned | Unassigned | 169_0  | Clustered           | 20 VC_169_0  | 20  | 0.7529 | 1          | 0.7529 | 0 | 0 | 0 | 1 Ref      |
| ON932085 | Unassigned | Unassigned | Unassigned | 749_0  | Clustered           | 40 VC_749_0  | 40  | 0.7517 | 1          | 0.7517 | 0 | 0 | 0 | 1 Ref      |
| ON933637 | Unassigned | Unassigned | Unassigned | 916_0  | Clustered           | 4 VC_916_0   | 4   | 0.8472 | 0.99985574 | 0.8471 | 0 | 0 | 0 | 1 Ref      |
| ON950090 | Unassigned | Unassigned | Unassigned | 385_0  | Clustered           | 51 VC_385_0  | 51  | 0.8754 | 1          | 0.8754 | 0 | 0 | 0 | 1 Ref      |
| ON960072 | Unassigned | Unassigned | Unassigned | 74_0   | Clustered           | 15 VC_74_0   | 15  | 0.5204 | 1          | 0.5204 | 0 | 0 | 0 | 1 Ref      |
| ON970561 | Unassigned | Unassigned | Unassigned | 1035_0 | Clustered           | 6 VC_1035_0  | 6   | 0.4854 | 1          | 0.4854 | 0 | 0 | 0 | 1 Ref      |
| ON970562 | Unassigned | Unassigned | Unassigned | 520_43 | Clustered           | 3 VC_520_43  | 3   | 0.0193 | 0.99837043 | 0.0193 | 0 | 0 | 0 | 1 Ref      |
| ON970563 | Unassigned | Unassigned | Unassigned | 1352_0 | Clustered           | 31 VC_1352_0 | 31  | 0.849  | 1          | 0.849  | 0 | 0 | 0 | 1 Ref      |
| ON970564 | Unassigned | Unassigned | Unassigned | 1044_0 | Clustered           | 3 VC_1044_0  | 3   | 0.0843 | 0.99852363 | 0.0842 | 0 | 0 | 0 | 1 Ref      |
| ON970565 | Unassigned | Unassigned | Unassigned | 517_1  | Clustered           | 108 VC_517_1 | 108 | 0.8483 | 1          | 0.8483 | 0 | 0 | 0 | 0.9955 Ref |
| ON970566 | Unassigned | Unassigned | Unassigned | 520_62 | Clustered/Singleton | 1 VC_520_62  | 1   | 0      | 1          | 0      | 0 | 0 | 0 | 1 Ref      |
| ON970567 | Unassigned | Unassigned | Unassigned | 1176_0 | Clustered           | 41 VC_1176_0 | 41  | 0.9558 | 1          | 0.9558 | 0 | 0 | 0 | 0.9976 Ref |
| ON970568 | Unassigned | Unassigned | Unassigned | 1206_0 | Clustered           | 8 VC_1206_0  | 8   | 0.1913 | 1          | 0.1913 | 0 | 0 | 0 | 1 Ref      |
| ON970569 | Unassigned | Unassigned | Unassigned | 1224_0 | Clustered           | 19 VC_1224_0 | 19  | 1      | 1          | 1      | 0 | 0 | 0 | 1 Ref      |
| ON970571 | Unassigned | Unassigned | Unassigned | 1163_0 | Clustered           | 28 VC_1163_0 | 28  | 0.4923 | 1          | 0.4923 | 0 | 0 | 0 | 1 Ref      |
| ON970572 | Unassigned | Unassigned | Unassigned | 799_1  | Clustered           | 27 VC_799_1  | 27  | 0.8611 | 1          | 0.8611 | 0 | 0 | 0 | 1 Ref      |
| ON970573 | Unassigned | Unassigned | Unassigned | 1344_0 | Clustered           | 78 VC_1344_0 | 78  | 0.9732 | 1          | 0.9732 | 0 | 0 | 0 | 1 Ref      |
| ON970574 | Unassigned | Unassigned | Unassigned | 519_0  | Clustered           | 39 VC_519_0  | 39  | 0.8156 | 1          | 0.8156 | 0 | 0 | 0 | 1 Ref      |
| ON970575 | Unassigned | Unassigned | Unassigned | 372_0  | Clustered           | 24 VC_372_0  | 24  | 0.5539 | 1          | 0.5539 | 0 | 0 | 0 | 1 Ref      |
| ON970576 | Unassigned | Unassigned | Unassigned | 919_0  | Clustered           | 39 VC_919_0  | 39  | 0.9069 | 1          | 0.9069 | 0 | 0 | 0 | 1 Ref      |
| ON970577 | Unassigned | Unassigned | Unassigned | 371_9  | Clustered           | 4 VC_371_9   | 4   | 0.0109 | 0.9999766  | 0.0109 | 0 | 0 | 0 | 0.6667 Ref |
| ON970578 | Unassigned | Unassigned | Unassigned | 955_0  | Clustered           | 3 VC_955_0   | 3   | 0.7745 | 0.99134622 | 0.7678 | 0 | 0 | 0 | 1 Ref      |
| ON970579 | Unassigned | Unassigned | Unassigned | 1071_0 | Clustered           | 20 VC_1071_0 | 20  | 0.3268 | 1          | 0.3268 | 0 | 0 | 0 | 0.9842 Ref |
| ON970580 | Unassigned | Unassigned | Unassigned | 950_0  | Clustered           | 38 VC_950_0  | 38  | 0.9443 | 1          | 0.9443 | 0 | 0 | 0 | 1 Ref      |
| ON970581 | Unassigned | Unassigned | Unassigned | 1240_0 | Clustered           | 82 VC_1240_0 | 82  | 0.7945 | 1          | 0.7945 | 0 | 0 | 0 | 1 Ref      |
| ON970582 | Unassigned | Unassigned | Unassigned | 866_1  | Clustered           | 20 VC_866_1  | 20  | 0.4814 | 1          | 0.4814 | 0 | 0 | 0 | 1 Ref      |
| ON970583 | Unassigned | Unassigned | Unassigned | 1162_0 | Clustered           | 10 VC_1162_0 | 10  | 0.5715 | 1          | 0.5715 | 0 | 0 | 0 | 1 Ref      |
| ON970584 | Unassigned | Unassigned | Unassigned | 1360_0 | Clustered           | 31 VC_1360_0 | 31  | 0.8837 | 1          | 0.8837 | 0 | 0 | 0 | 1 Ref      |
| ON970585 | Unassigned | Unassigned | Unassigned | 520_84 | Clustered/Singleton | 1 VC_520_84  | 1   | 0      | 1          | 0      | 0 | 0 | 0 | 1 Ref      |
| ON970586 | Unassigned | Unassigned | Unassigned | 325_0  | Clustered           | 2 VC_325_0   | 2   | 0.0041 | 0.95574439 | 0.0039 | 0 | 0 | 0 | 1 Ref      |
| ON970587 | Unassigned | Unassigned | Unassigned | 508_0  | Clustered           | 32 VC_508_0  | 32  | 0.906  | 1          | 0.906  | 0 | 0 | 0 | 1 Ref      |
| ON970588 | Unassigned | Unassigned | Unassigned | 866_1  | Clustered           | 20 VC_866_1  | 20  | 0.4814 | 1          | 0.4814 | 0 | 0 | 0 | 1 Ref      |
| ON970589 | Unassigned | Unassigned | Unassigned | 1344_0 | Clustered           | 78 VC_1344_0 | 78  | 0.9732 | 1          | 0.9732 | 0 | 0 | 0 | 1 Ref      |
| ON970590 | Unassigned | Unassigned | Unassigned | 1071_0 | Clustered           | 20 VC_1071_0 | 20  | 0.3268 | 1          | 0.3268 | 0 | 0 | 0 | 0.9842 Ref |
| ON970591 | Unassigned | Unassigned | Unassigned | 1071_2 | Clustered           | 5 VC_1071_2  | 5   | 0.0534 | 0.99997362 | 0.0534 | 0 | 0 | 0 | 0.9 Ref    |
| ON970592 | Unassigned | Unassigned | Unassigned | 1350_0 | Clustered           | 2 VC_1350_0  | 2   | 0.1631 | 0.95304852 | 0.1555 | 0 | 0 | 0 | 1 Ref      |
| ON970593 | Unassigned | Unassigned | Unassigned | 508_0  | Clustered           | 32 VC_508_0  | 32  | 0.906  | 1          | 0.906  | 0 | 0 | 0 | 1 Ref      |
| ON970594 | Unassigned | Unassigned | Unassigned | 371_7  | Clustered/Singleton | 1 VC_371_7   | 1   | 0      | 1          | 0      | 0 | 0 | 0 | 1 Ref      |
| ON970595 | Unassigned | Unassigned | Unassigned | 520_58 | Clustered           | 3 VC_520_58  | 3   | 0.021  | 0.9985993  | 0.021  | 0 | 0 | 0 | 1 Ref      |
| ON970596 | Unassigned | Unassigned | Unassigned | 866_1  | Clustered           | 20 VC_866_1  | 20  | 0.4814 | 1          | 0.4814 | 0 | 0 | 0 | 1 Ref      |
| ON970597 | Unassigned | Unassigned | Unassigned | 551_6  | Clustered           | 22 VC_551_6  | 22  | 0.1214 | 1          | 0.1214 | 0 | 0 | 0 | 0.8095 Ref |
| ON970598 | Unassigned | Unassigned | Unassigned | 1036_0 | Clustered           | 11 VC_1036_0 | 11  | 0.656  | 1          | 0.656  | 0 | 0 | 0 | 0.8727 Ref |
| ON970599 | Unassigned | Unassigned | Unassigned | 919_0  | Clustered           | 39 VC_919_0  | 39  | 0.9069 | 1          | 0.9069 | 0 | 0 | 0 | 1 Ref      |
| ON970600 | Unassigned | Unassigned | Unassigned | 551_6  | Clustered           | 22 VC_551_6  | 22  | 0.1214 | 1          | 0.1214 | 0 | 0 | 0 | 0.8095 Ref |
| ON970601 | Unassigned | Unassigned | Unassigned | 1073_0 | Clustered           | 24 VC_1073_0 | 24  | 0.8388 | 1          | 0.8388 | 0 | 0 | 0 | 1 Ref      |
| ON970602 | Unassigned | Unassigned | Unassigned | 1178_0 | Clustered           | 24 VC_1178_0 | 24  | 0.9524 | 1          | 0.9524 | 0 | 0 | 0 | 1 Ref      |
| ON970603 | Unassigned | Unassigned | Unassigned | 856_0  | Clustered           | 7 VC_856_0   | 7   | 0.3463 | 1          | 0.3463 | 0 | 0 | 0 | 1 Ref      |
| ON970604 | Unassigned | Unassigned | Unassigned | 1166_0 | Clustered           | 20 VC_1166_0 | 20  | 0.99   | 1          | 0.99   | 0 | 0 | 0 | 1 Ref      |
| ON970605 | Unassigned | Unassigned | Unassigned | 1240_0 | Clustered           | 82 VC_1240_0 | 82  | 0.7945 | 1          | 0.7945 | 0 | 0 | 0 | 1 Ref      |
| ON970606 | Unassigned | Unassigned | Unassigned | 1240_0 | Clustered           | 82 VC_1240_0 | 82  | 0.7945 | 1          | 0.7945 | 0 | 0 | 0 | 1 Ref      |
| ON970607 | Unassigned | Unassigned | Unassigned | 866_1  | Clustered           | 20 VC_866_1  | 20  | 0.4814 | 1          | 0.4814 | 0 | 0 | 0 | 1 Ref      |
| ON970608 | Unassigned | Unassigned | Unassigned | 1044_0 | Clustered           | 3 VC_1044_0  | 3   | 0.0843 | 0.99852363 | 0.0842 | 0 | 0 | 0 | 1 Ref      |
| ON970609 | Unassigned | Unassigned | Unassigned | 919_0  | Clustered           | 39 VC_919_0  | 39  | 0.9069 | 1          | 0.9069 | 0 | 0 | 0 | 1 Ref      |
| ON970610 | Unassigned | Unassigned | Unassigned | 520_67 | Clustered/Singleton | 1 VC_520_67  | 1   | 0      | 1          | 0      | 0 | 0 | 0 | 1 Ref      |
| ON970611 | Unassigned | Unassigned | Unassigned | 572_0  | Clustered           | 16 VC_572_0  | 16  | 0.7286 | 1          | 0.7286 | 0 | 0 | 0 | 1 Ref      |
| ON970612 | Unassigned | Unassigned | Unassigned | 1352_0 | Clustered           | 31 VC_1352_0 | 31  | 0.849  | 1          | 0.849  | 0 | 0 | 0 | 1 Ref      |



|          |            |            |            |        |                     |              |     |        |            |        |   |   |   |            |
|----------|------------|------------|------------|--------|---------------------|--------------|-----|--------|------------|--------|---|---|---|------------|
| ON970613 | Unassigned | Unassigned | Unassigned | 1344_0 | Clustered           | 78 VC_1344_0 | 78  | 0.9732 | 1          | 0.9732 | 0 | 0 | 0 | 1 Ref      |
| ON970614 | Unassigned | Unassigned | Unassigned | 517_0  | Clustered           | 18 VC_517_0  | 18  | 0.1599 | 1          | 0.1599 | 0 | 0 | 0 | 1 Ref      |
| ON970616 | Unassigned | Unassigned | Unassigned | 1207_0 | Clustered           | 29 VC_1207_0 | 29  | 0.8225 | 1          | 0.8225 | 0 | 0 | 0 | 1 Ref      |
| ON970618 | Unassigned | Unassigned | Unassigned | 761_0  | Clustered           | 67 VC_761_0  | 67  | 0.8947 | 1          | 0.8947 | 0 | 0 | 0 | 1 Ref      |
| ON970619 | Unassigned | Unassigned | Unassigned | 1178_0 | Clustered           | 24 VC_1178_0 | 24  | 0.9524 | 1          | 0.9524 | 0 | 0 | 0 | 1 Ref      |
| ON970620 | Unassigned | Unassigned | Unassigned | 570_0  | Clustered           | 9 VC_570_0   | 9   | 0.499  | 1          | 0.499  | 0 | 0 | 0 | 1 Ref      |
| ON970621 | Unassigned | Unassigned | Unassigned | 919_0  | Clustered           | 39 VC_919_0  | 39  | 0.9069 | 1          | 0.9069 | 0 | 0 | 0 | 1 Ref      |
| ON970622 | Unassigned | Unassigned | Unassigned | 799_1  | Clustered           | 27 VC_799_1  | 27  | 0.8611 | 1          | 0.8611 | 0 | 0 | 0 | 1 Ref      |
| ON970623 | Unassigned | Unassigned | Unassigned | 513_0  | Clustered           | 32 VC_513_0  | 32  | 0.6881 | 1          | 0.6881 | 0 | 0 | 0 | 1 Ref      |
| ON970624 | Unassigned | Unassigned | Unassigned | 325_58 | Clustered/Singleton | 1 VC_325_58  | 1   | 0      | 1          | 0      | 0 | 0 | 0 | 1 Ref      |
| ON970625 | Unassigned | Unassigned | Unassigned | 940_0  | Clustered           | 34 VC_940_0  | 34  | 0.7959 | 1          | 0.7959 | 0 | 0 | 0 | 1 Ref      |
| ON970626 | Unassigned | Unassigned | Unassigned | 940_0  | Clustered           | 34 VC_940_0  | 34  | 0.7959 | 1          | 0.7959 | 0 | 0 | 0 | 1 Ref      |
| ON970627 | Unassigned | Unassigned | Unassigned | 325_23 | Clustered           | 17 VC_325_23 | 17  | 0.0716 | 1          | 0.0716 | 0 | 0 | 0 | 0.6397 Ref |
| ON989481 | Unassigned | Unassigned | Unassigned | 8_0    | Clustered           | 58 VC_8_0    | 58  | 0.8306 | 1          | 0.8306 | 0 | 0 | 0 | 0.9946 Ref |
| ON995367 | Unassigned | Unassigned | Unassigned | 389_0  | Clustered           | 3 VC_389_0   | 3   | 0.0515 | 0.99861557 | 0.0514 | 0 | 0 | 0 | 1 Ref      |
| ON996339 | Unassigned | Unassigned | Unassigned | 637_0  | Clustered           | 115 VC_637_0 | 115 | 0.731  | 1          | 0.731  | 0 | 0 | 0 | 0.8764 Ref |
| ON996340 | Unassigned | Unassigned | Unassigned | 364_0  | Clustered           | 16 VC_364_0  | 16  | 0.6491 | 1          | 0.6491 | 0 | 0 | 0 | 1 Ref      |
| OP009265 | Unassigned | Unassigned | Unassigned | 923_0  | Clustered           | 23 VC_923_0  | 23  | 0.9455 | 1          | 0.9455 | 0 | 0 | 0 | 1 Ref      |
| OP009266 | Unassigned | Unassigned | Unassigned | 923_0  | Clustered           | 23 VC_923_0  | 23  | 0.9455 | 1          | 0.9455 | 0 | 0 | 0 | 1 Ref      |
| OP009267 | Unassigned | Unassigned | Unassigned | 923_0  | Clustered           | 23 VC_923_0  | 23  | 0.9455 | 1          | 0.9455 | 0 | 0 | 0 | 1 Ref      |
| OP009268 | Unassigned | Unassigned | Unassigned | 923_0  | Clustered           | 23 VC_923_0  | 23  | 0.9455 | 1          | 0.9455 | 0 | 0 | 0 | 1 Ref      |
| OP009269 | Unassigned | Unassigned | Unassigned | 923_0  | Clustered           | 23 VC_923_0  | 23  | 0.9455 | 1          | 0.9455 | 0 | 0 | 0 | 1 Ref      |
| OP009270 | Unassigned | Unassigned | Unassigned | 923_0  | Clustered           | 23 VC_923_0  | 23  | 0.9455 | 1          | 0.9455 | 0 | 0 | 0 | 1 Ref      |
| OP009271 | Unassigned | Unassigned | Unassigned | 923_0  | Clustered           | 23 VC_923_0  | 23  | 0.9455 | 1          | 0.9455 | 0 | 0 | 0 | 1 Ref      |
| OP009272 | Unassigned | Unassigned | Unassigned | 885_0  | Clustered           | 11 VC_885_0  | 11  | 0.9774 | 1          | 0.9774 | 0 | 0 | 0 | 1 Ref      |
| OP009273 | Unassigned | Unassigned | Unassigned | 923_0  | Clustered           | 23 VC_923_0  | 23  | 0.9455 | 1          | 0.9455 | 0 | 0 | 0 | 1 Ref      |
| OP009274 | Unassigned | Unassigned | Unassigned | 1029_0 | Clustered           | 4 VC_1029_0  | 4   | 0.9006 | 0.99995764 | 0.9006 | 0 | 0 | 0 | 1 Ref      |
| OP009275 | Unassigned | Unassigned | Unassigned | 885_0  | Clustered           | 11 VC_885_0  | 11  | 0.9774 | 1          | 0.9774 | 0 | 0 | 0 | 1 Ref      |
| OP009276 | Unassigned | Unassigned | Unassigned | 923_0  | Clustered           | 23 VC_923_0  | 23  | 0.9455 | 1          | 0.9455 | 0 | 0 | 0 | 1 Ref      |
| OP009277 | Unassigned | Unassigned | Unassigned | 923_0  | Clustered           | 23 VC_923_0  | 23  | 0.9455 | 1          | 0.9455 | 0 | 0 | 0 | 1 Ref      |
| OP009278 | Unassigned | Unassigned | Unassigned | 885_0  | Clustered           | 11 VC_885_0  | 11  | 0.9774 | 1          | 0.9774 | 0 | 0 | 0 | 1 Ref      |
| OP009279 | Unassigned | Unassigned | Unassigned | 923_0  | Clustered           | 23 VC_923_0  | 23  | 0.9455 | 1          | 0.9455 | 0 | 0 | 0 | 1 Ref      |
| OP009280 | Unassigned | Unassigned | Unassigned | 885_0  | Clustered           | 11 VC_885_0  | 11  | 0.9774 | 1          | 0.9774 | 0 | 0 | 0 | 1 Ref      |
| OP009281 | Unassigned | Unassigned | Unassigned | 1029_0 | Clustered           | 4 VC_1029_0  | 4   | 0.9006 | 0.99995764 | 0.9006 | 0 | 0 | 0 | 1 Ref      |
| OP009282 | Unassigned | Unassigned | Unassigned | 749_0  | Clustered           | 40 VC_749_0  | 40  | 0.7517 | 1          | 0.7517 | 0 | 0 | 0 | 1 Ref      |
| OP009283 | Unassigned | Unassigned | Unassigned | 923_0  | Clustered           | 23 VC_923_0  | 23  | 0.9455 | 1          | 0.9455 | 0 | 0 | 0 | 1 Ref      |
| OP009284 | Unassigned | Unassigned | Unassigned | 923_0  | Clustered           | 23 VC_923_0  | 23  | 0.9455 | 1          | 0.9455 | 0 | 0 | 0 | 1 Ref      |
| OP009285 | Unassigned | Unassigned | Unassigned | 471_0  | Clustered           | 2 VC_471_0   | 2   | 0.0804 | 0.95665719 | 0.0769 | 0 | 0 | 0 | 1 Ref      |
| OP009286 | Unassigned | Unassigned | Unassigned | 885_0  | Clustered           | 11 VC_885_0  | 11  | 0.9774 | 1          | 0.9774 | 0 | 0 | 0 | 1 Ref      |
| OP009287 | Unassigned | Unassigned | Unassigned | 923_0  | Clustered           | 23 VC_923_0  | 23  | 0.9455 | 1          | 0.9455 | 0 | 0 | 0 | 1 Ref      |
| OP009288 | Unassigned | Unassigned | Unassigned | 923_0  | Clustered           | 23 VC_923_0  | 23  | 0.9455 | 1          | 0.9455 | 0 | 0 | 0 | 1 Ref      |
| OP013026 | Unassigned | Unassigned | Unassigned | 823_0  | Clustered           | 124 VC_823_0 | 124 | 0.9492 | 1          | 0.9492 | 0 | 0 | 0 | 1 Ref      |
| OP018999 | Unassigned | Unassigned | Unassigned | 452_0  | Clustered           | 66 VC_452_0  | 66  | 0.9248 | 1          | 0.9248 | 0 | 0 | 0 | 1 Ref      |
| OP019135 | Unassigned | Unassigned | Unassigned | 699_0  | Clustered           | 71 VC_699_0  | 71  | 0.9352 | 1          | 0.9352 | 0 | 0 | 0 | 1 Ref      |
| OP021677 | Unassigned | Unassigned | Unassigned | 325_62 | Clustered           | 3 VC_325_62  | 3   | 0.0188 | 0.99859194 | 0.0188 | 0 | 0 | 0 | 1 Ref      |
| OP021678 | Unassigned | Unassigned | Unassigned | 1224_0 | Clustered           | 19 VC_1224_0 | 19  | 0.9416 | 1          | 0.9416 | 0 | 0 | 0 | 1 Ref      |
| OP021679 | Unassigned | Unassigned | Unassigned | 224_0  | Clustered           | 19 VC_224_0  | 19  | 0.9416 | 1          | 0.9416 | 0 | 0 | 0 | 1 Ref      |
| OP021680 | Unassigned | Unassigned | Unassigned | 1071_0 | Clustered           | 20 VC_1071_0 | 20  | 0.3268 | 1          | 0.3268 | 0 | 0 | 0 | 0.9842 Ref |
| OP021681 | Unassigned | Unassigned | Unassigned | 558_24 | Clustered/Singleton | 1 VC_558_24  | 1   | 0      | 1          | 0      | 0 | 0 | 0 | 1 Ref      |
| OP021682 | Unassigned | Unassigned | Unassigned | 558_67 | Clustered/Singleton | 1 VC_558_67  | 1   | 0      | 1          | 0      | 0 | 0 | 0 | 1 Ref      |
| OP021683 | Unassigned | Unassigned | Unassigned | 1240_0 | Clustered           | 82 VC_1240_0 | 82  | 0.7945 | 1          | 0.7945 | 0 | 0 | 0 | 1 Ref      |
| OP021684 | Unassigned | Unassigned | Unassigned | 558_50 | Clustered           | 15 VC_558_50 | 15  | 0.0468 | 1          | 0.0468 | 0 | 0 | 0 | 0.9238 Ref |
| OP022426 | Unassigned | Unassigned | Unassigned | 897_0  | Clustered           | 6 VC_897_0   | 6   | 0.4156 | 1          | 0.4156 | 0 | 0 | 0 | 1 Ref      |
| OP028995 | Unassigned | Unassigned | Unassigned | 935_0  | Clustered           | 2 VC_935_0   | 2   | 0.7079 | 0.72985431 | 0.5167 | 0 | 0 | 0 | 1 Ref      |
| OP038318 | Unassigned | Unassigned | Unassigned | 8_0    | Clustered           | 58 VC_8_0    | 58  | 0.8306 | 1          | 0.8306 | 0 | 0 | 0 | 0.9946 Ref |
| OP038319 | Unassigned | Unassigned | Unassigned | 8_0    | Clustered           | 58 VC_8_0    | 58  | 0.8306 | 1          | 0.8306 | 0 | 0 | 0 | 0.9946 Ref |
| OP038320 | Unassigned | Unassigned | Unassigned | 10_0   | Clustered           | 25 VC_10_0   | 25  | 0.3467 | 1          | 0.3467 | 0 | 0 | 0 | 0.9733 Ref |
| OP038547 | Unassigned | Unassigned | Unassigned | 452_0  | Clustered           | 66 VC_452_0  | 66  | 0.9248 | 1          | 0.9248 | 0 | 0 | 0 | 1 Ref      |
| OP045496 | Unassigned | Unassigned | Unassigned | 823_0  | Clustered           | 124 VC_823_0 | 124 | 0.9492 | 1          | 0.9492 | 0 | 0 | 0 | 1 Ref      |
| OP045497 | Unassigned | Unassigned | Unassigned | 668_0  | Clustered           | 25 VC_668_0  | 25  | 0.5539 | 1          | 0.5539 | 0 | 0 | 0 | 0.96 Ref   |
| OP045498 | Unassigned | Unassigned | Unassigned | 191_19 | Clustered           | 12 VC_191_19 | 12  | 0.0655 | 1          | 0.0655 | 0 | 0 | 0 | 0.8636 Ref |
| OP046317 | Unassigned | Unassigned | Unassigned | 835_0  | Clustered           | 67 VC_835_0  | 67  | 0.9624 | 1          | 0.9624 | 0 | 0 | 0 | 1 Ref      |
| OP053360 | Unassigned | Unassigned | Unassigned | 664_0  | Clustered           | 4 VC_664_0   | 4   | 0.263  | 0.99998747 | 0.263  | 0 | 0 | 0 | 1 Ref      |
| OP053361 | Unassigned | Unassigned | Unassigned | 664_0  | Clustered           | 4 VC_664_0   | 4   | 0.263  | 0.99998747 | 0.263  | 0 | 0 | 0 | 1 Ref      |
| OP053362 | Unassigned | Unassigned | Unassigned | 664_0  | Clustered           | 4 VC_664_0   | 4   | 0.263  | 0.99998747 | 0.263  | 0 | 0 | 0 | 1 Ref      |
| OP056089 | Unassigned | Unassigned | Unassigned | 793_0  | Clustered           | 12 VC_793_0  | 12  | 0.8531 | 1          | 0.8531 | 0 | 0 | 0 | 1 Ref      |
| OP056300 | Unassigned | Unassigned | Unassigned | 778_0  | Clustered           | 4 VC_778_0   | 4   | 0.8115 | 0.99985435 | 0.8114 | 0 | 0 | 0 | 1 Ref      |
| OP067662 | Unassigned | Unassigned | Unassigned | 364_0  | Clustered           | 16 VC_364_0  | 16  | 0.6491 | 1          | 0.6491 | 0 | 0 | 0 | 1 Ref      |
| OP068331 | Unassigned | Unassigned | Unassigned | 1171_0 | Clustered           | 21 VC_1171_0 | 21  | 0.7125 | 1          | 0.7125 | 0 | 0 | 0 | 1 Ref      |
| OP068332 | Unassigned | Unassigned | Unassigned | 1171_0 | Clustered           | 21 VC_1171_0 | 21  | 0.7125 | 1          | 0.7125 | 0 | 0 | 0 | 1 Ref      |
| OP068333 | Unassigned | Unassigned | Unassigned | 856_1  | Clustered           | 13 VC_856_1  | 13  | 0.5848 | 1          | 0.5848 | 0 | 0 | 0 | 1 Ref      |
| OP068334 | Unassigned | Unassigned | Unassigned | 1440_0 | Clustered           | 4 VC_1440_0  | 4   | 1      | 1          | 1      | 0 | 0 | 0 | 1 Ref      |
| OP068335 | Unassigned | Unassigned | Unassigned | 1361_0 | Clustered           | 6 VC_1361_0  | 6   | 0.2371 | 1          | 0.2371 | 0 | 0 | 0 | 1 Ref      |
| OP068336 | Unassigned | Unassigned | Unassigned | 1171_0 | Clustered           | 21 VC_1171_0 | 21  | 0.7125 | 1          | 0.7125 | 0 | 0 | 0 | 1 Ref      |
| OP068337 | Unassigned | Unassigned | Unassigned | 1171_0 | Clustered           | 21 VC_1171_0 | 21  | 0.7125 | 1          | 0.7125 | 0 | 0 | 0 | 1 Ref      |
| OP068338 | Unassigned | Unassigned | Unassigned | 1352_0 | Clustered           | 31 VC_1352_0 | 31  | 0.849  | 1          | 0.849  | 0 | 0 | 0 | 1 Ref      |
| OP068339 | Unassigned | Unassigned | Unassigned | 1163_0 | Clustered           | 28 VC_1163_0 | 28  | 0.4923 | 1          | 0.4923 | 0 | 0 | 0 | 1 Ref      |
| OP068340 | Unassigned | Unassigned | Unassigned | 520_22 | Clustered/Singleton | 1 VC_520_22  | 1   | 0      | 1          | 0      | 0 | 0 | 0 | 1 Ref      |
| OP068341 | Unassigned | Unassigned | Unassigned | 558_49 | Clustered           | 7 VC_558_49  | 7   | 0.0194 | 0.99510369 | 0.0193 | 0 | 0 | 0 | 0.8571 Ref |
| OP068342 | Unassigned | Unassigned | Unassigned | 1095_0 | Clustered           | 16 VC_1095_0 | 16  | 0.458  | 1          | 0.458  | 0 | 0 | 0 | 1 Ref      |
| OP068343 | Unassigned | Unassigned | Unassigned | 1100_3 | Clustered/Singleton | 1 VC_1100_3  | 1   | 0      | 1          | 0      | 0 | 0 | 0 | 1 Ref      |



|          |            |            |            |         |                     |              |     |        |            |        |   |   |   |            |
|----------|------------|------------|------------|---------|---------------------|--------------|-----|--------|------------|--------|---|---|---|------------|
| OP068344 | Unassigned | Unassigned | Unassigned | 1171_0  | Clustered           | 21 VC_1171_0 | 21  | 0.7125 | 1          | 0.7125 | 0 | 0 | 0 | 1 Ref      |
| OP079918 | Unassigned | Unassigned | Unassigned | 452_0   | Clustered           | 66 VC_452_0  | 66  | 0.9248 | 1          | 0.9248 | 0 | 0 | 0 | 1 Ref      |
| OP087522 | Unassigned | Unassigned | Unassigned | 456_0   | Clustered           | 62 VC_456_0  | 62  | 0.9026 | 1          | 0.9026 | 0 | 0 | 0 | 1 Ref      |
| OP094641 | Unassigned | Unassigned | Unassigned | 575_0   | Clustered           | 35 VC_575_0  | 35  | 0.8815 | 1          | 0.8815 | 0 | 0 | 0 | 1 Ref      |
| OP103917 | Unassigned | Unassigned | Unassigned | 823_0   | Clustered           | 124 VC_823_0 | 124 | 0.9492 | 1          | 0.9492 | 0 | 0 | 0 | 1 Ref      |
| OP103918 | Unassigned | Unassigned | Unassigned | 823_0   | Clustered           | 124 VC_823_0 | 124 | 0.9492 | 1          | 0.9492 | 0 | 0 | 0 | 1 Ref      |
| OP103919 | Unassigned | Unassigned | Unassigned | 823_0   | Clustered           | 124 VC_823_0 | 124 | 0.9492 | 1          | 0.9492 | 0 | 0 | 0 | 1 Ref      |
| OP103920 | Unassigned | Unassigned | Unassigned | 823_0   | Clustered           | 124 VC_823_0 | 124 | 0.9492 | 1          | 0.9492 | 0 | 0 | 0 | 1 Ref      |
| OP103921 | Unassigned | Unassigned | Unassigned | 823_0   | Clustered           | 124 VC_823_0 | 124 | 0.9492 | 1          | 0.9492 | 0 | 0 | 0 | 1 Ref      |
| OP103922 | Unassigned | Unassigned | Unassigned | 823_0   | Clustered           | 124 VC_823_0 | 124 | 0.9492 | 1          | 0.9492 | 0 | 0 | 0 | 1 Ref      |
| OP103923 | Unassigned | Unassigned | Unassigned | 823_0   | Clustered           | 124 VC_823_0 | 124 | 0.9492 | 1          | 0.9492 | 0 | 0 | 0 | 1 Ref      |
| OP114730 | Unassigned | Unassigned | Unassigned | 123_0   | Clustered           | 23 VC_123_0  | 23  | 0.817  | 1          | 0.817  | 0 | 0 | 0 | 1 Ref      |
| OP114731 | Unassigned | Unassigned | Unassigned | 111_0   | Clustered           | 91 VC_111_0  | 91  | 0.9587 | 1          | 0.9587 | 0 | 0 | 0 | 1 Ref      |
| OP114732 | Unassigned | Unassigned | Unassigned | 242_1   | Clustered           | 20 VC_242_1  | 20  | 0.684  | 1          | 0.684  | 0 | 0 | 0 | 0.8368 Ref |
| OP117450 | Unassigned | Unassigned | Unassigned | 837_0   | Clustered           | 29 VC_837_0  | 29  | 0.9955 | 1          | 0.9955 | 0 | 0 | 0 | 1 Ref      |
| OP121182 | Unassigned | Unassigned | Unassigned | 231_0   | Clustered           | 3 VC_231_0   | 3   | 0.236  | 0.99824503 | 0.2356 | 0 | 0 | 0 | 1 Ref      |
| OP125534 | Unassigned | Unassigned | Unassigned | 354_0   | Clustered           | 4 VC_354_0   | 4   | 0.1749 | 0.99998684 | 0.1749 | 0 | 0 | 0 | 0.8333 Ref |
| OP131293 | Unassigned | Unassigned | Unassigned | 486_0   | Clustered           | 18 VC_486_0  | 18  | 0.887  | 1          | 0.887  | 0 | 0 | 0 | 1 Ref      |
| OP131294 | Unassigned | Unassigned | Unassigned | 486_0   | Clustered           | 18 VC_486_0  | 18  | 0.887  | 1          | 0.887  | 0 | 0 | 0 | 1 Ref      |
| OP131295 | Unassigned | Unassigned | Unassigned | 486_0   | Clustered           | 18 VC_486_0  | 18  | 0.887  | 1          | 0.887  | 0 | 0 | 0 | 1 Ref      |
| OP131296 | Unassigned | Unassigned | Unassigned | 486_0   | Clustered           | 18 VC_486_0  | 18  | 0.887  | 1          | 0.887  | 0 | 0 | 0 | 1 Ref      |
| OP131297 | Unassigned | Unassigned | Unassigned | 486_0   | Clustered           | 18 VC_486_0  | 18  | 0.887  | 1          | 0.887  | 0 | 0 | 0 | 1 Ref      |
| OP131299 | Unassigned | Unassigned | Unassigned | 486_0   | Clustered           | 18 VC_486_0  | 18  | 0.887  | 1          | 0.887  | 0 | 0 | 0 | 1 Ref      |
| OP131300 | Unassigned | Unassigned | Unassigned | 486_0   | Clustered           | 18 VC_486_0  | 18  | 0.887  | 1          | 0.887  | 0 | 0 | 0 | 1 Ref      |
| OP131301 | Unassigned | Unassigned | Unassigned | 486_0   | Clustered           | 18 VC_486_0  | 18  | 0.887  | 1          | 0.887  | 0 | 0 | 0 | 1 Ref      |
| OP131302 | Unassigned | Unassigned | Unassigned | 486_0   | Clustered           | 18 VC_486_0  | 18  | 0.887  | 1          | 0.887  | 0 | 0 | 0 | 1 Ref      |
| OP132241 | Unassigned | Unassigned | Unassigned | 428_0   | Clustered           | 33 VC_428_0  | 33  | 0.9915 | 1          | 0.9915 | 0 | 0 | 0 | 1 Ref      |
| OP136131 | Unassigned | Unassigned | Unassigned | 8_0     | Clustered           | 58 VC_8_0    | 58  | 0.8306 | 1          | 0.8306 | 0 | 0 | 0 | 0.9946 Ref |
| OP136132 | Unassigned | Unassigned | Unassigned | 8_0     | Clustered           | 58 VC_8_0    | 58  | 0.8306 | 1          | 0.8306 | 0 | 0 | 0 | 0.9946 Ref |
| OP136133 | Unassigned | Unassigned | Unassigned | 7_0     | Clustered           | 28 VC_7_0    | 28  | 0.3916 | 1          | 0.3916 | 0 | 0 | 0 | 0.9947 Ref |
| OP136134 | Unassigned | Unassigned | Unassigned | 8_0     | Clustered           | 58 VC_8_0    | 58  | 0.8306 | 1          | 0.8306 | 0 | 0 | 0 | 0.9946 Ref |
| OP136135 | Unassigned | Unassigned | Unassigned | 10_0    | Clustered           | 25 VC_10_0   | 25  | 0.3467 | 1          | 0.3467 | 0 | 0 | 0 | 0.9733 Ref |
| OP136151 | Unassigned | Unassigned | Unassigned | 1228_0  | Clustered           | 2 VC_1228_0  | 2   | 0.9902 | 0.72985431 | 0.7227 | 0 | 0 | 0 | 1 Ref      |
| OP168678 | Unassigned | Unassigned | Unassigned | 11_0    | Clustered           | 19 VC_11_0   | 19  | 0.7562 | 1          | 0.7562 | 0 | 0 | 0 | 1 Ref      |
| OP168898 | Unassigned | Unassigned | Unassigned | 283_135 | Clustered/Singleton | 1 VC_283_135 | 1   | 0      | 1          | 0      | 0 | 0 | 0 | 1 Ref      |
| OP171942 | Unassigned | Unassigned | Unassigned | 699_0   | Clustered           | 71 VC_699_0  | 71  | 0.9352 | 1          | 0.9352 | 0 | 0 | 0 | 1 Ref      |
| OP171943 | Unassigned | Unassigned | Unassigned | 192_0   | Clustered           | 15 VC_192_0  | 15  | 0.5071 | 1          | 0.5071 | 0 | 0 | 0 | 1 Ref      |
| OP172867 | Unassigned | Unassigned | Unassigned | 519_0   | Clustered           | 39 VC_519_0  | 39  | 0.8156 | 1          | 0.8156 | 0 | 0 | 0 | 1 Ref      |
| OP172868 | Unassigned | Unassigned | Unassigned | 572_0   | Clustered           | 16 VC_572_0  | 16  | 0.7286 | 1          | 0.7286 | 0 | 0 | 0 | 1 Ref      |
| OP172870 | Unassigned | Unassigned | Unassigned | 572_0   | Clustered           | 16 VC_572_0  | 16  | 0.7286 | 1          | 0.7286 | 0 | 0 | 0 | 1 Ref      |
| OP172872 | Unassigned | Unassigned | Unassigned | 761_0   | Clustered           | 67 VC_761_0  | 67  | 0.8947 | 1          | 0.8947 | 0 | 0 | 0 | 1 Ref      |
| OP172873 | Unassigned | Unassigned | Unassigned | 511_0   | Clustered           | 3 VC_511_0   | 3   | 0.1104 | 0.99858683 | 0.1103 | 0 | 0 | 0 | 1 Ref      |
| OP172874 | Unassigned | Unassigned | Unassigned | 511_0   | Clustered           | 3 VC_511_0   | 3   | 0.1104 | 0.99858683 | 0.1103 | 0 | 0 | 0 | 1 Ref      |
| OP172875 | Unassigned | Unassigned | Unassigned | 1234_0  | Clustered           | 44 VC_1234_0 | 44  | 1      | 1          | 1      | 0 | 0 | 0 | 1 Ref      |
| OP172876 | Unassigned | Unassigned | Unassigned | 572_0   | Clustered           | 16 VC_572_0  | 16  | 0.7286 | 1          | 0.7286 | 0 | 0 | 0 | 1 Ref      |
| OP172877 | Unassigned | Unassigned | Unassigned | 1093_0  | Clustered           | 40 VC_1093_0 | 40  | 0.8754 | 1          | 0.8754 | 0 | 0 | 0 | 1 Ref      |
| OP172878 | Unassigned | Unassigned | Unassigned | 1200_0  | Clustered           | 4 VC_1200_0  | 4   | 0.8691 | 0.9999992  | 0.8691 | 0 | 0 | 0 | 1 Ref      |
| OP177727 | Unassigned | Unassigned | Unassigned | 848_0   | Clustered           | 28 VC_848_0  | 28  | 0.7927 | 1          | 0.7927 | 0 | 0 | 0 | 1 Ref      |
| OP186293 | Unassigned | Unassigned | Unassigned | 977_2   | Clustered/Singleton | 1 VC_977_2   | 1   | 0      | 1          | 0      | 0 | 0 | 0 | 1 Ref      |
| OP197928 | Unassigned | Unassigned | Unassigned | 283_22  | Clustered/Singleton | 1 VC_283_22  | 1   | 0      | 1          | 0      | 0 | 0 | 0 | 1 Ref      |
| OP209174 | Unassigned | Unassigned | Unassigned | 1116_0  | Clustered           | 14 VC_1116_0 | 14  | 0.7927 | 1          | 0.7927 | 0 | 0 | 0 | 1 Ref      |
| OP209176 | Unassigned | Unassigned | Unassigned | 1294_0  | Clustered           | 6 VC_1294_0  | 6   | 0.6626 | 0.99999272 | 0.6626 | 0 | 0 | 0 | 1 Ref      |
| OP235318 | Unassigned | Unassigned | Unassigned | 149_15  | Clustered           | 16 VC_149_15 | 16  | 0.0788 | 1          | 0.0788 | 0 | 0 | 0 | 0.8083 Ref |
| OP251154 | Unassigned | Unassigned | Unassigned | 456_0   | Clustered           | 62 VC_456_0  | 62  | 0.9026 | 1          | 0.9026 | 0 | 0 | 0 | 1 Ref      |
| OP254195 | Unassigned | Unassigned | Unassigned | 695_0   | Clustered           | 48 VC_695_0  | 48  | 0.8162 | 1          | 0.8162 | 0 | 0 | 0 | 1 Ref      |
| OP256047 | Unassigned | Unassigned | Unassigned | 823_0   | Clustered           | 124 VC_823_0 | 124 | 0.9492 | 1          | 0.9492 | 0 | 0 | 0 | 1 Ref      |
| OP256049 | Unassigned | Unassigned | Unassigned | 899_0   | Clustered           | 4 VC_899_0   | 4   | 0.2655 | 0.99997104 | 0.2655 | 0 | 0 | 0 | 1 Ref      |
| OP263967 | Unassigned | Unassigned | Unassigned | 149_9   | Clustered           | 3 VC_149_9   | 3   | 0.0084 | 0.97854556 | 0.0082 | 0 | 0 | 0 | 1 Ref      |
| OP263968 | Unassigned | Unassigned | Unassigned | 149_19  | Clustered/Singleton | 1 VC_149_19  | 1   | 0      | 1          | 0      | 0 | 0 | 0 | 1 Ref      |
| OP263969 | Unassigned | Unassigned | Unassigned | 153_0   | Clustered           | 25 VC_153_0  | 25  | 0.7729 | 1          | 0.7729 | 0 | 0 | 0 | 1 Ref      |
| OP265889 | Unassigned | Unassigned | Unassigned | 28_1    | Clustered           | 53 VC_28_1   | 53  | 0.7164 | 1          | 0.7164 | 0 | 0 | 0 | 0.9325 Ref |
| OP267563 | Unassigned | Unassigned | Unassigned | 938_0   | Clustered           | 99 VC_938_0  | 99  | 0.9119 | 1          | 0.9119 | 0 | 0 | 0 | 0.9928 Ref |
| OP279344 | Unassigned | Unassigned | Unassigned | 247_0   | Clustered           | 14 VC_247_0  | 14  | 0.9119 | 1          | 0.9119 | 0 | 0 | 0 | 0.967 Ref  |
| OP291336 | Unassigned | Unassigned | Unassigned | 699_0   | Clustered           | 71 VC_699_0  | 71  | 0.9352 | 1          | 0.9352 | 0 | 0 | 0 | 1 Ref      |
| OP292222 | Unassigned | Unassigned | Unassigned | 290_6   | Clustered           | 12 VC_290_6  | 12  | 0.1149 | 1          | 0.1149 | 0 | 0 | 0 | 0.8182 Ref |
| OP292288 | Unassigned | Unassigned | Unassigned | 423_0   | Clustered           | 45 VC_423_0  | 45  | 0.9484 | 1          | 0.9484 | 0 | 0 | 0 | 1 Ref      |
| OP292654 | Unassigned | Unassigned | Unassigned | 164_6   | Clustered/Singleton | 1 VC_164_6   | 1   | 0      | 1          | 0      | 0 | 0 | 0 | 1 Ref      |
| OP292673 | Unassigned | Unassigned | Unassigned | 584_0   | Clustered           | 28 VC_584_0  | 28  | 0.7704 | 1          | 0.7704 | 0 | 0 | 0 | 1 Ref      |
| OP292674 | Unassigned | Unassigned | Unassigned | 584_0   | Clustered           | 28 VC_584_0  | 28  | 0.7704 | 1          | 0.7704 | 0 | 0 | 0 | 1 Ref      |
| OP293079 | Unassigned | Unassigned | Unassigned | 353_0   | Clustered           | 6 VC_353_0   | 6   | 0.545  | 1          | 0.545  | 0 | 0 | 0 | 1 Ref      |
| OP293233 | Unassigned | Unassigned | Unassigned | 813_0   | Clustered           | 12 VC_813_0  | 12  | 0.2347 | 1          | 0.2347 | 0 | 0 | 0 | 1 Ref      |
| OP294982 | Unassigned | Unassigned | Unassigned | 761_0   | Clustered           | 67 VC_761_0  | 67  | 0.8947 | 1          | 0.8947 | 0 | 0 | 0 | 1 Ref      |
| OP296941 | Unassigned | Unassigned | Unassigned | 582_3   | Clustered           | 12 VC_582_3  | 12  | 0.2357 | 1          | 0.2357 | 0 | 0 | 0 | 0.8636 Ref |
| OP297178 | Unassigned | Unassigned | Unassigned | 149_6   | Clustered/Singleton | 1 VC_149_6   | 1   | 0      | 1          | 0      | 0 | 0 | 0 | 1 Ref      |
| OP297528 | Unassigned | Unassigned | Unassigned | 520_78  | Clustered           | 2 VC_520_78  | 2   | 0.008  | 0.95761153 | 0.0076 | 0 | 0 | 0 | 1 Ref      |
| OP297529 | Unassigned | Unassigned | Unassigned | 517_1   | Clustered           | 108 VC_517_1 | 108 | 0.8483 | 1          | 0.8483 | 0 | 0 | 0 | 0.9955 Ref |
| OP297531 | Unassigned | Unassigned | Unassigned | 919_0   | Clustered           | 39 VC_919_0  | 39  | 0.9069 | 1          | 0.9069 | 0 | 0 | 0 | 1 Ref      |
| OP297532 | Unassigned | Unassigned | Unassigned | 221_0   | Clustered           | 22 VC_221_0  | 22  | 0.7447 | 1          | 0.7447 | 0 | 0 | 0 | 1 Ref      |
| OP297533 | Unassigned | Unassigned | Unassigned | 810_0   | Clustered           | 18 VC_810_0  | 18  | 0.9121 | 1          | 0.9121 | 0 | 0 | 0 | 1 Ref      |
| OP297534 | Unassigned | Unassigned | Unassigned | 558_39  | Clustered           | 3 VC_558_39  | 3   | 0.0063 | 0.73849574 | 0.0047 | 0 | 0 | 0 | 0.6667 Ref |
| OP297535 | Unassigned | Unassigned | Unassigned | 955_0   | Clustered           | 3 VC_955_0   | 3   | 0.7745 | 0.99134622 | 0.7678 | 0 | 0 | 0 | 1 Ref      |



|          |            |            |            |        |                     |              |     |        |            |        |   |   |   |        |     |
|----------|------------|------------|------------|--------|---------------------|--------------|-----|--------|------------|--------|---|---|---|--------|-----|
| OP297536 | Unassigned | Unassigned | Unassigned | 520_31 | Clustered           | 11 VC_520_31 | 11  | 0.0897 | 1          | 0.0897 | 0 | 0 | 0 | 0.6    | Ref |
| OP297537 | Unassigned | Unassigned | Unassigned | 216_6  | Clustered           | 42 VC_216_6  | 42  | 0.473  | 1          | 0.473  | 0 | 0 | 0 | 0.8351 | Ref |
| OP297538 | Unassigned | Unassigned | Unassigned | 1360_0 | Clustered           | 31 VC_1360_0 | 31  | 0.8837 | 1          | 0.8837 | 0 | 0 | 0 | 1      | Ref |
| OP297539 | Unassigned | Unassigned | Unassigned | 1098_0 | Clustered           | 4 VC_1098_0  | 4   | 0.5465 | 0.99996462 | 0.5465 | 0 | 0 | 0 | 1      | Ref |
| OP297540 | Unassigned | Unassigned | Unassigned | 521_0  | Clustered           | 37 VC_521_0  | 37  | 0.912  | 1          | 0.912  | 0 | 0 | 0 | 1      | Ref |
| OP297541 | Unassigned | Unassigned | Unassigned | 372_4  | Clustered           | 3 VC_372_4   | 3   | 0.033  | 0.99853257 | 0.0329 | 0 | 0 | 0 | 1      | Ref |
| OP297542 | Unassigned | Unassigned | Unassigned | 520_55 | Clustered/Singleton | 1 VC_520_55  | 1   | 0      | 1          | 0      | 0 | 0 | 0 | 1      | Ref |
| OP297543 | Unassigned | Unassigned | Unassigned | 1352_0 | Clustered           | 31 VC_1352_0 | 31  | 0.849  | 1          | 0.849  | 0 | 0 | 0 | 1      | Ref |
| OP297544 | Unassigned | Unassigned | Unassigned | 1175_0 | Clustered           | 22 VC_1175_0 | 22  | 0.4562 | 1          | 0.4562 | 0 | 0 | 0 | 1      | Ref |
| OP297546 | Unassigned | Unassigned | Unassigned | 525_0  | Clustered           | 25 VC_525_0  | 25  | 0.4597 | 1          | 0.4597 | 0 | 0 | 0 | 1      | Ref |
| OP297547 | Unassigned | Unassigned | Unassigned | 866_1  | Clustered           | 20 VC_866_1  | 20  | 0.4814 | 1          | 0.4814 | 0 | 0 | 0 | 1      | Ref |
| OP297548 | Unassigned | Unassigned | Unassigned | 522_1  | Clustered           | 5 VC_522_1   | 5   | 0.1017 | 0.99999997 | 0.1017 | 0 | 0 | 0 | 0.8    | Ref |
| OP297549 | Unassigned | Unassigned | Unassigned | 221_0  | Clustered           | 22 VC_221_0  | 22  | 0.7447 | 1          | 0.7447 | 0 | 0 | 0 | 1      | Ref |
| OP297550 | Unassigned | Unassigned | Unassigned | 1166_0 | Clustered           | 20 VC_1166_0 | 20  | 0.99   | 1          | 0.99   | 0 | 0 | 0 | 1      | Ref |
| OP297551 | Unassigned | Unassigned | Unassigned | 763_1  | Clustered           | 9 VC_763_1   | 9   | 0.3706 | 1          | 0.3706 | 0 | 0 | 0 | 1      | Ref |
| OP297552 | Unassigned | Unassigned | Unassigned | 1166_0 | Clustered           | 20 VC_1166_0 | 20  | 0.99   | 1          | 0.99   | 0 | 0 | 0 | 1      | Ref |
| OP297553 | Unassigned | Unassigned | Unassigned | 215_1  | Clustered           | 19 VC_215_1  | 19  | 0.4188 | 1          | 0.4188 | 0 | 0 | 0 | 1      | Ref |
| OP297622 | Unassigned | Unassigned | Unassigned | 0_0    | Clustered           | 3 VC_0_0     | 3   | 1      | 1          | 1      | 0 | 0 | 0 | 1      | Ref |
| OP310970 | Unassigned | Unassigned | Unassigned | 79_7   | Clustered           | 33 VC_79_7   | 33  | 0.216  | 1          | 0.216  | 0 | 0 | 0 | 0.8409 | Ref |
| OP310971 | Unassigned | Unassigned | Unassigned | 79_7   | Clustered           | 33 VC_79_7   | 33  | 0.216  | 1          | 0.216  | 0 | 0 | 0 | 0.8409 | Ref |
| OP310972 | Unassigned | Unassigned | Unassigned | 79_7   | Clustered           | 33 VC_79_7   | 33  | 0.216  | 1          | 0.216  | 0 | 0 | 0 | 0.8409 | Ref |
| OP310973 | Unassigned | Unassigned | Unassigned | 79_7   | Clustered           | 33 VC_79_7   | 33  | 0.216  | 1          | 0.216  | 0 | 0 | 0 | 0.8409 | Ref |
| OP310974 | Unassigned | Unassigned | Unassigned | 79_6   | Clustered           | 11 VC_79_6   | 11  | 0.0528 | 1          | 0.0528 | 0 | 0 | 0 | 0.7455 | Ref |
| OP310975 | Unassigned | Unassigned | Unassigned | 79_0   | Clustered           | 64 VC_79_0   | 64  | 0.4185 | 1          | 0.4185 | 0 | 0 | 0 | 0.7649 | Ref |
| OP310976 | Unassigned | Unassigned | Unassigned | 79_7   | Clustered           | 33 VC_79_7   | 33  | 0.216  | 1          | 0.216  | 0 | 0 | 0 | 0.8409 | Ref |
| OP310977 | Unassigned | Unassigned | Unassigned | 79_0   | Clustered           | 64 VC_79_0   | 64  | 0.4185 | 1          | 0.4185 | 0 | 0 | 0 | 0.7649 | Ref |
| OP310978 | Unassigned | Unassigned | Unassigned | 79_7   | Clustered           | 33 VC_79_7   | 33  | 0.216  | 1          | 0.216  | 0 | 0 | 0 | 0.8409 | Ref |
| OP310979 | Unassigned | Unassigned | Unassigned | 79_3   | Clustered/Singleton | 1 VC_79_3    | 1   | 0      | 1          | 0      | 0 | 0 | 0 | 1      | Ref |
| OP310980 | Unassigned | Unassigned | Unassigned | 79_7   | Clustered           | 33 VC_79_7   | 33  | 0.216  | 1          | 0.216  | 0 | 0 | 0 | 0.8409 | Ref |
| OP310981 | Unassigned | Unassigned | Unassigned | 79_7   | Clustered           | 33 VC_79_7   | 33  | 0.216  | 1          | 0.216  | 0 | 0 | 0 | 0.8409 | Ref |
| OP310982 | Unassigned | Unassigned | Unassigned | 79_7   | Clustered           | 33 VC_79_7   | 33  | 0.216  | 1          | 0.216  | 0 | 0 | 0 | 0.8409 | Ref |
| OP310983 | Unassigned | Unassigned | Unassigned | 344_0  | Clustered           | 21 VC_344_0  | 21  | 0.5436 | 1          | 0.5436 | 0 | 0 | 0 | 1      | Ref |
| OP310984 | Unassigned | Unassigned | Unassigned | 344_0  | Clustered           | 21 VC_344_0  | 21  | 0.5436 | 1          | 0.5436 | 0 | 0 | 0 | 1      | Ref |
| OP312987 | Unassigned | Unassigned | Unassigned | 779_0  | Clustered           | 37 VC_779_0  | 37  | 0.5682 | 1          | 0.5682 | 0 | 0 | 0 | 1      | Ref |
| OP313111 | Unassigned | Unassigned | Unassigned | 83_0   | Clustered           | 6 VC_83_0    | 6   | 0.6436 | 1          | 0.6436 | 0 | 0 | 0 | 1      | Ref |
| OP313112 | Unassigned | Unassigned | Unassigned | 784_0  | Clustered           | 6 VC_784_0   | 6   | 0.5517 | 1          | 0.5517 | 0 | 0 | 0 | 1      | Ref |
| OP314870 | Unassigned | Unassigned | Unassigned | 79_0   | Clustered           | 64 VC_79_0   | 64  | 0.4185 | 1          | 0.4185 | 0 | 0 | 0 | 0.7649 | Ref |
| OP314871 | Unassigned | Unassigned | Unassigned | 79_0   | Clustered           | 64 VC_79_0   | 64  | 0.4185 | 1          | 0.4185 | 0 | 0 | 0 | 0.7649 | Ref |
| OP314872 | Unassigned | Unassigned | Unassigned | 79_7   | Clustered           | 33 VC_79_7   | 33  | 0.216  | 1          | 0.216  | 0 | 0 | 0 | 0.8409 | Ref |
| OP323059 | Unassigned | Unassigned | Unassigned | 149_15 | Clustered           | 16 VC_149_15 | 16  | 0.0788 | 1          | 0.0788 | 0 | 0 | 0 | 0.8083 | Ref |
| OP328420 | Unassigned | Unassigned | Unassigned | 8_0    | Clustered           | 58 VC_8_0    | 58  | 0.8306 | 1          | 0.8306 | 0 | 0 | 0 | 0.9946 | Ref |
| OP328422 | Unassigned | Unassigned | Unassigned | 8_0    | Clustered           | 58 VC_8_0    | 58  | 0.8306 | 1          | 0.8306 | 0 | 0 | 0 | 0.9946 | Ref |
| OP328423 | Unassigned | Unassigned | Unassigned | 10_0   | Clustered           | 25 VC_10_0   | 25  | 0.3467 | 1          | 0.3467 | 0 | 0 | 0 | 0.9733 | Ref |
| OP331213 | Unassigned | Unassigned | Unassigned | 491_0  | Clustered           | 36 VC_491_0  | 36  | 0.5336 | 1          | 0.5336 | 0 | 0 | 0 | 0.9714 | Ref |
| OP331230 | Unassigned | Unassigned | Unassigned | 392_0  | Clustered           | 126 VC_392_0 | 126 | 0.9621 | 1          | 0.9621 | 0 | 0 | 0 | 1      | Ref |
| OP341624 | Unassigned | Unassigned | Unassigned | 107_0  | Clustered           | 5 VC_107_0   | 5   | 0.4515 | 0.99999995 | 0.4515 | 0 | 0 | 0 | 1      | Ref |
| OP341625 | Unassigned | Unassigned | Unassigned | 101_0  | Clustered           | 3 VC_101_0   | 3   | 0.3621 | 0.99764884 | 0.3612 | 0 | 0 | 0 | 1      | Ref |
| OP341626 | Unassigned | Unassigned | Unassigned | 107_0  | Clustered           | 5 VC_107_0   | 5   | 0.4515 | 0.99999995 | 0.4515 | 0 | 0 | 0 | 1      | Ref |
| OP341627 | Unassigned | Unassigned | Unassigned | 107_0  | Clustered           | 5 VC_107_0   | 5   | 0.4515 | 0.99999995 | 0.4515 | 0 | 0 | 0 | 1      | Ref |
| OP341628 | Unassigned | Unassigned | Unassigned | 107_0  | Clustered           | 5 VC_107_0   | 5   | 0.4515 | 0.99999995 | 0.4515 | 0 | 0 | 0 | 1      | Ref |
| OP341630 | Unassigned | Unassigned | Unassigned | 107_0  | Clustered           | 5 VC_107_0   | 5   | 0.4515 | 0.99999995 | 0.4515 | 0 | 0 | 0 | 1      | Ref |
| OP342787 | Unassigned | Unassigned | Unassigned | 472_0  | Clustered           | 47 VC_472_0  | 47  | 0.9025 | 1          | 0.9025 | 0 | 0 | 0 | 1      | Ref |
| OP352608 | Unassigned | Unassigned | Unassigned | 618_0  | Clustered           | 13 VC_618_0  | 13  | 0.6252 | 1          | 0.6252 | 0 | 0 | 0 | 1      | Ref |
| OP361299 | Unassigned | Unassigned | Unassigned | 169_0  | Clustered           | 20 VC_169_0  | 20  | 0.7529 | 1          | 0.7529 | 0 | 0 | 0 | 1      | Ref |
| OP373729 | Unassigned | Unassigned | Unassigned | 460_0  | Clustered           | 19 VC_460_0  | 19  | 0.3744 | 1          | 0.3744 | 0 | 0 | 0 | 1      | Ref |
| OP374154 | Unassigned | Unassigned | Unassigned | 8_0    | Clustered           | 58 VC_8_0    | 58  | 0.8306 | 1          | 0.8306 | 0 | 0 | 0 | 0.9946 | Ref |
| OP374155 | Unassigned | Unassigned | Unassigned | 8_0    | Clustered           | 58 VC_8_0    | 58  | 0.8306 | 1          | 0.8306 | 0 | 0 | 0 | 0.9946 | Ref |
| OP374156 | Unassigned | Unassigned | Unassigned | 8_0    | Clustered           | 58 VC_8_0    | 58  | 0.8306 | 1          | 0.8306 | 0 | 0 | 0 | 0.9946 | Ref |
| OP375635 | Unassigned | Unassigned | Unassigned | 642_2  | Clustered           | 6 VC_642_2   | 6   | 0.1679 | 1          | 0.1679 | 0 | 0 | 0 | 1      | Ref |
| OP377721 | Unassigned | Unassigned | Unassigned | 28_1   | Clustered           | 53 VC_28_1   | 53  | 0.7164 | 1          | 0.7164 | 0 | 0 | 0 | 0.9325 | Ref |
| OP380269 | Unassigned | Unassigned | Unassigned | 169_0  | Clustered           | 20 VC_169_0  | 20  | 0.7529 | 1          | 0.7529 | 0 | 0 | 0 | 1      | Ref |
| OP381444 | Unassigned | Unassigned | Unassigned | 1022_0 | Clustered           | 4 VC_1022_0  | 4   | 0.8047 | 0.99996089 | 0.8046 | 0 | 0 | 0 | 1      | Ref |
| OP394141 | Unassigned | Unassigned | Unassigned | 190_23 | Clustered           | 10 VC_190_23 | 10  | 0.0704 | 1          | 0.0704 | 0 | 0 | 0 | 0.8444 | Ref |
| OP394178 | Unassigned | Unassigned | Unassigned | 38_0   | Clustered           | 3 VC_38_0    | 3   | 1      | 0          | 0      | 0 | 0 | 0 | 1      | Ref |
| OP413828 | Unassigned | Unassigned | Unassigned | 452_0  | Clustered           | 66 VC_452_0  | 66  | 0.9248 | 1          | 0.9248 | 0 | 0 | 0 | 1      | Ref |
| OP413829 | Unassigned | Unassigned | Unassigned | 111_0  | Clustered           | 91 VC_111_0  | 91  | 0.9587 | 1          | 0.9587 | 0 | 0 | 0 | 1      | Ref |
| OP413830 | Unassigned | Unassigned | Unassigned | 452_0  | Clustered           | 66 VC_452_0  | 66  | 0.9248 | 1          | 0.9248 | 0 | 0 | 0 | 1      | Ref |
| OP413832 | Unassigned | Unassigned | Unassigned | 938_0  | Clustered           | 99 VC_938_0  | 99  | 0.9119 | 1          | 0.9119 | 0 | 0 | 0 | 0.9928 | Ref |
| OP422637 | Unassigned | Unassigned | Unassigned | 749_0  | Clustered           | 40 VC_749_0  | 40  | 0.7517 | 1          | 0.7517 | 0 | 0 | 0 | 1      | Ref |
| OP433453 | Unassigned | Unassigned | Unassigned | 1441_0 | Clustered           | 2 VC_1441_0  | 2   | 1      | 1          | 1      | 0 | 0 | 0 | 1      | Ref |
| OP434439 | Unassigned | Unassigned | Unassigned | 1234_0 | Clustered           | 44 VC_1234_0 | 44  | 1      | 1          | 1      | 0 | 0 | 0 | 1      | Ref |
| OP434440 | Unassigned | Unassigned | Unassigned | 525_0  | Clustered           | 25 VC_525_0  | 25  | 0.4597 | 1          | 0.4597 | 0 | 0 | 0 | 1      | Ref |
| OP434441 | Unassigned | Unassigned | Unassigned | 509_0  | Clustered           | 37 VC_509_0  | 37  | 0.9689 | 1          | 0.9689 | 0 | 0 | 0 | 1      | Ref |
| OP434442 | Unassigned | Unassigned | Unassigned | 1036_0 | Clustered           | 11 VC_1036_0 | 11  | 0.656  | 1          | 0.656  | 0 | 0 | 0 | 0.8727 | Ref |
| OP434443 | Unassigned | Unassigned | Unassigned | 1234_0 | Clustered           | 44 VC_1234_0 | 44  | 1      | 1          | 1      | 0 | 0 | 0 | 1      | Ref |
| OP434444 | Unassigned | Unassigned | Unassigned | 1160_0 | Clustered           | 73 VC_1160_0 | 73  | 0.9835 | 1          | 0.9835 | 0 | 0 | 0 | 1      | Ref |
| OP434445 | Unassigned | Unassigned | Unassigned | 1234_0 | Clustered           | 44 VC_1234_0 | 44  | 1      | 1          | 1      | 0 | 0 | 0 | 1      | Ref |
| OP434447 | Unassigned | Unassigned | Unassigned | 223_0  | Clustered           | 38 VC_223_0  | 38  | 0.9095 | 1          | 0.9095 | 0 | 0 | 0 | 1      | Ref |
| OP434448 | Unassigned | Unassigned | Unassigned | 869_0  | Clustered           | 9 VC_869_0   | 9   | 0.2624 | 1          | 0.2624 | 0 | 0 | 0 | 1      | Ref |
| OP434450 | Unassigned | Unassigned | Unassigned | 866_1  | Clustered           | 20 VC_866_1  | 20  | 0.4814 | 1          | 0.4814 | 0 | 0 | 0 | 1      | Ref |
| OP434451 | Unassigned | Unassigned | Unassigned | 802_0  | Clustered           | 17 VC_802_0  | 17  | 0.8025 | 1          | 0.8025 | 0 | 0 | 0 | 1      | Ref |



|          |            |            |            |        |                     |               |     |        |            |        |   |   |   |            |
|----------|------------|------------|------------|--------|---------------------|---------------|-----|--------|------------|--------|---|---|---|------------|
| OP434452 | Unassigned | Unassigned | Unassigned | 1170_0 | Clustered           | 3 VC_1170_0   | 3   | 0.3275 | 0.99834213 | 0.327  | 0 | 0 | 0 | 1 Ref      |
| OP434453 | Unassigned | Unassigned | Unassigned | 1369_0 | Clustered           | 3 VC_1369_0   | 3   | 0.9809 | 0.9595722  | 0.9412 | 0 | 0 | 0 | 1 Ref      |
| OP434454 | Unassigned | Unassigned | Unassigned | 519_0  | Clustered           | 39 VC_519_0   | 39  | 0.8156 | 1          | 0.8156 | 0 | 0 | 0 | 1 Ref      |
| OP434455 | Unassigned | Unassigned | Unassigned | 1207_0 | Clustered           | 29 VC_1207_0  | 29  | 0.8225 | 1          | 0.8225 | 0 | 0 | 0 | 1 Ref      |
| OP434456 | Unassigned | Unassigned | Unassigned | 1093_0 | Clustered           | 40 VC_1093_0  | 40  | 0.8754 | 1          | 0.8754 | 0 | 0 | 0 | 1 Ref      |
| OP434457 | Unassigned | Unassigned | Unassigned | 522_1  | Clustered           | 5 VC_522_1    | 5   | 0.1017 | 0.99999997 | 0.1017 | 0 | 0 | 0 | 0.8 Ref    |
| OP434458 | Unassigned | Unassigned | Unassigned | 557_0  | Clustered           | 3 VC_557_0    | 3   | 0.0814 | 0.99853279 | 0.0812 | 0 | 0 | 0 | 0.6667 Ref |
| OP434459 | Unassigned | Unassigned | Unassigned | 371_11 | Clustered           | 31 VC_371_11  | 31  | 0.0927 | 1          | 0.0927 | 0 | 0 | 0 | 0.7011 Ref |
| OP434460 | Unassigned | Unassigned | Unassigned | 685_0  | Clustered           | 16 VC_685_0   | 16  | 0.2972 | 1          | 0.2972 | 0 | 0 | 0 | 0.9167 Ref |
| OP434461 | Unassigned | Unassigned | Unassigned | 510_0  | Clustered           | 12 VC_510_0   | 12  | 0.3963 | 1          | 0.3963 | 0 | 0 | 0 | 0.9697 Ref |
| OP434462 | Unassigned | Unassigned | Unassigned | 1164_0 | Clustered           | 25 VC_1164_0  | 25  | 0.7312 | 1          | 0.7312 | 0 | 0 | 0 | 1 Ref      |
| OP434463 | Unassigned | Unassigned | Unassigned | 1036_0 | Clustered           | 11 VC_1036_0  | 11  | 0.656  | 1          | 0.656  | 0 | 0 | 0 | 0.8727 Ref |
| OP453108 | Unassigned | Unassigned | Unassigned | 592_0  | Clustered           | 50 VC_592_0   | 50  | 0.7314 | 1          | 0.7314 | 0 | 0 | 0 | 1 Ref      |
| OP455115 | Unassigned | Unassigned | Unassigned | 575_0  | Clustered           | 35 VC_575_0   | 35  | 0.8815 | 1          | 0.8815 | 0 | 0 | 0 | 1 Ref      |
| OP480062 | Unassigned | Unassigned | Unassigned | 582_0  | Clustered           | 4 VC_582_0    | 4   | 0.0589 | 0.99996986 | 0.0589 | 0 | 0 | 0 | 1 Ref      |
| OP480063 | Unassigned | Unassigned | Unassigned | 582_0  | Clustered           | 4 VC_582_0    | 4   | 0.0589 | 0.99996986 | 0.0589 | 0 | 0 | 0 | 1 Ref      |
| OP481875 | Unassigned | Unassigned | Unassigned | 460_0  | Clustered           | 19 VC_460_0   | 19  | 0.3744 | 1          | 0.3744 | 0 | 0 | 0 | 1 Ref      |
| OP484843 | Unassigned | Unassigned | Unassigned | 5_0    | Clustered           | 30 VC_5_0     | 30  | 0.9647 | 1          | 0.9647 | 0 | 0 | 0 | 1 Ref      |
| OP484850 | Unassigned | Unassigned | Unassigned | 637_0  | Clustered           | 115 VC_637_0  | 115 | 0.731  | 1          | 0.731  | 0 | 0 | 0 | 0.8764 Ref |
| OP484857 | Unassigned | Unassigned | Unassigned | 770_0  | Clustered           | 5 VC_770_0    | 5   | 0.8394 | 0.99999405 | 0.8394 | 0 | 0 | 0 | 1 Ref      |
| OP484858 | Unassigned | Unassigned | Unassigned | 770_0  | Clustered           | 5 VC_770_0    | 5   | 0.8394 | 0.99999405 | 0.8394 | 0 | 0 | 0 | 1 Ref      |
| OP493557 | Unassigned | Unassigned | Unassigned | 7_0    | Clustered           | 28 VC_7_0     | 28  | 0.3916 | 1          | 0.3916 | 0 | 0 | 0 | 0.9947 Ref |
| OP493558 | Unassigned | Unassigned | Unassigned | 10_0   | Clustered           | 25 VC_10_0    | 25  | 0.3467 | 1          | 0.3467 | 0 | 0 | 0 | 0.9733 Ref |
| OP494211 | Unassigned | Unassigned | Unassigned | 637_0  | Clustered           | 115 VC_637_0  | 115 | 0.731  | 1          | 0.731  | 0 | 0 | 0 | 0.8764 Ref |
| OP494865 | Unassigned | Unassigned | Unassigned | 620_0  | Clustered           | 27 VC_620_0   | 27  | 0.879  | 1          | 0.879  | 0 | 0 | 0 | 1 Ref      |
| OP503543 | Unassigned | Unassigned | Unassigned | 620_0  | Clustered           | 27 VC_620_0   | 27  | 0.879  | 1          | 0.879  | 0 | 0 | 0 | 1 Ref      |
| OP503968 | Unassigned | Unassigned | Unassigned | 620_0  | Clustered           | 27 VC_620_0   | 27  | 0.879  | 1          | 0.879  | 0 | 0 | 0 | 1 Ref      |
| OP503969 | Unassigned | Unassigned | Unassigned | 620_0  | Clustered           | 27 VC_620_0   | 27  | 0.879  | 1          | 0.879  | 0 | 0 | 0 | 1 Ref      |
| OP503970 | Unassigned | Unassigned | Unassigned | 620_0  | Clustered           | 27 VC_620_0   | 27  | 0.879  | 1          | 0.879  | 0 | 0 | 0 | 1 Ref      |
| OP503971 | Unassigned | Unassigned | Unassigned | 620_0  | Clustered           | 27 VC_620_0   | 27  | 0.879  | 1          | 0.879  | 0 | 0 | 0 | 1 Ref      |
| OP503972 | Unassigned | Unassigned | Unassigned | 620_0  | Clustered           | 27 VC_620_0   | 27  | 0.879  | 1          | 0.879  | 0 | 0 | 0 | 1 Ref      |
| OP503973 | Unassigned | Unassigned | Unassigned | 620_0  | Clustered           | 27 VC_620_0   | 27  | 0.879  | 1          | 0.879  | 0 | 0 | 0 | 1 Ref      |
| OP503974 | Unassigned | Unassigned | Unassigned | 620_0  | Clustered           | 27 VC_620_0   | 27  | 0.879  | 1          | 0.879  | 0 | 0 | 0 | 1 Ref      |
| OP503975 | Unassigned | Unassigned | Unassigned | 620_0  | Clustered           | 27 VC_620_0   | 27  | 0.879  | 1          | 0.879  | 0 | 0 | 0 | 1 Ref      |
| OP503976 | Unassigned | Unassigned | Unassigned | 620_0  | Clustered           | 27 VC_620_0   | 27  | 0.879  | 1          | 0.879  | 0 | 0 | 0 | 1 Ref      |
| OP503977 | Unassigned | Unassigned | Unassigned | 620_0  | Clustered           | 27 VC_620_0   | 27  | 0.879  | 1          | 0.879  | 0 | 0 | 0 | 1 Ref      |
| OP503978 | Unassigned | Unassigned | Unassigned | 620_0  | Clustered           | 27 VC_620_0   | 27  | 0.879  | 1          | 0.879  | 0 | 0 | 0 | 1 Ref      |
| OP503979 | Unassigned | Unassigned | Unassigned | 620_0  | Clustered           | 27 VC_620_0   | 27  | 0.879  | 1          | 0.879  | 0 | 0 | 0 | 1 Ref      |
| OP503980 | Unassigned | Unassigned | Unassigned | 620_0  | Clustered           | 27 VC_620_0   | 27  | 0.879  | 1          | 0.879  | 0 | 0 | 0 | 1 Ref      |
| OP503981 | Unassigned | Unassigned | Unassigned | 620_0  | Clustered           | 27 VC_620_0   | 27  | 0.879  | 1          | 0.879  | 0 | 0 | 0 | 1 Ref      |
| OP503982 | Unassigned | Unassigned | Unassigned | 620_0  | Clustered           | 27 VC_620_0   | 27  | 0.879  | 1          | 0.879  | 0 | 0 | 0 | 1 Ref      |
| OP503983 | Unassigned | Unassigned | Unassigned | 620_0  | Clustered           | 27 VC_620_0   | 27  | 0.879  | 1          | 0.879  | 0 | 0 | 0 | 1 Ref      |
| OP503984 | Unassigned | Unassigned | Unassigned | 620_0  | Clustered           | 27 VC_620_0   | 27  | 0.879  | 1          | 0.879  | 0 | 0 | 0 | 1 Ref      |
| OP503985 | Unassigned | Unassigned | Unassigned | 620_0  | Clustered           | 27 VC_620_0   | 27  | 0.879  | 1          | 0.879  | 0 | 0 | 0 | 1 Ref      |
| OP503986 | Unassigned | Unassigned | Unassigned | 620_0  | Clustered           | 27 VC_620_0   | 27  | 0.879  | 1          | 0.879  | 0 | 0 | 0 | 1 Ref      |
| OP503987 | Unassigned | Unassigned | Unassigned | 620_0  | Clustered           | 27 VC_620_0   | 27  | 0.879  | 1          | 0.879  | 0 | 0 | 0 | 1 Ref      |
| OP503988 | Unassigned | Unassigned | Unassigned | 620_0  | Clustered           | 27 VC_620_0   | 27  | 0.879  | 1          | 0.879  | 0 | 0 | 0 | 1 Ref      |
| OP503992 | Unassigned | Unassigned | Unassigned | 708_0  | Clustered           | 47 VC_708_0   | 47  | 0.8654 | 1          | 0.8654 | 0 | 0 | 0 | 1 Ref      |
| OP503993 | Unassigned | Unassigned | Unassigned | 708_0  | Clustered           | 47 VC_708_0   | 47  | 0.8654 | 1          | 0.8654 | 0 | 0 | 0 | 1 Ref      |
| OP503994 | Unassigned | Unassigned | Unassigned | 708_0  | Clustered           | 47 VC_708_0   | 47  | 0.8654 | 1          | 0.8654 | 0 | 0 | 0 | 1 Ref      |
| OP503995 | Unassigned | Unassigned | Unassigned | 708_0  | Clustered           | 47 VC_708_0   | 47  | 0.8654 | 1          | 0.8654 | 0 | 0 | 0 | 1 Ref      |
| OP508218 | Unassigned | Unassigned | Unassigned | 699_0  | Clustered           | 71 VC_699_0   | 71  | 0.9352 | 1          | 0.9352 | 0 | 0 | 0 | 1 Ref      |
| OP535471 | Unassigned | Unassigned | Unassigned | 592_0  | Clustered           | 50 VC_592_0   | 50  | 0.7314 | 1          | 0.7314 | 0 | 0 | 0 | 1 Ref      |
| OP535472 | Unassigned | Unassigned | Unassigned | 592_0  | Clustered           | 50 VC_592_0   | 50  | 0.7314 | 1          | 0.7314 | 0 | 0 | 0 | 1 Ref      |
| OP547477 | Unassigned | Unassigned | Unassigned | 882_0  | Clustered           | 20 VC_882_0   | 20  | 0.9917 | 1          | 0.9917 | 0 | 0 | 0 | 1 Ref      |
| OP547478 | Unassigned | Unassigned | Unassigned | 904_2  | Clustered           | 7 VC_904_2    | 7   | 0.2857 | 1          | 0.2857 | 0 | 0 | 0 | 1 Ref      |
| OP549864 | Unassigned | Unassigned | Unassigned | 1336_0 | Clustered           | 3 VC_1336_0   | 3   | 0.4948 | 0.99528984 | 0.4925 | 0 | 0 | 0 | 1 Ref      |
| OP549865 | Unassigned | Unassigned | Unassigned | 1336_0 | Clustered           | 3 VC_1336_0   | 3   | 0.4948 | 0.99528984 | 0.4925 | 0 | 0 | 0 | 1 Ref      |
| OP549866 | Unassigned | Unassigned | Unassigned | 1336_0 | Clustered           | 3 VC_1336_0   | 3   | 0.4948 | 0.99528984 | 0.4925 | 0 | 0 | 0 | 1 Ref      |
| OP549867 | Unassigned | Unassigned | Unassigned | 1276_0 | Clustered           | 7 VC_1276_0   | 7   | 0.8695 | 0.99982476 | 0.8693 | 0 | 0 | 0 | 1 Ref      |
| OP549868 | Unassigned | Unassigned | Unassigned | 1243_0 | Clustered           | 52 VC_1243_0  | 52  | 0.9126 | 0.92708311 | 0.8461 | 0 | 0 | 0 | 1 Ref      |
| OP549869 | Unassigned | Unassigned | Unassigned | 1104_0 | Clustered           | 154 VC_1104_0 | 154 | 0.8484 | 1          | 0.8484 | 0 | 0 | 0 | 1 Ref      |
| OP549870 | Unassigned | Unassigned | Unassigned | 1151_0 | Clustered           | 9 VC_1151_0   | 9   | 0.8548 | 1          | 0.8548 | 0 | 0 | 0 | 1 Ref      |
| OP549871 | Unassigned | Unassigned | Unassigned | 1243_0 | Clustered           | 52 VC_1243_0  | 52  | 0.9126 | 0.92708311 | 0.8461 | 0 | 0 | 0 | 1 Ref      |
| OP549872 | Unassigned | Unassigned | Unassigned | 1104_0 | Clustered           | 154 VC_1104_0 | 154 | 0.8484 | 1          | 0.8484 | 0 | 0 | 0 | 1 Ref      |
| OP549873 | Unassigned | Unassigned | Unassigned | 1151_0 | Clustered           | 9 VC_1151_0   | 9   | 0.8548 | 1          | 0.8548 | 0 | 0 | 0 | 1 Ref      |
| OP549874 | Unassigned | Unassigned | Unassigned | 1243_0 | Clustered           | 52 VC_1243_0  | 52  | 0.9126 | 0.92708311 | 0.8461 | 0 | 0 | 0 | 1 Ref      |
| OP549875 | Unassigned | Unassigned | Unassigned | 1104_0 | Clustered           | 154 VC_1104_0 | 154 | 0.8484 | 1          | 0.8484 | 0 | 0 | 0 | 1 Ref      |
| OP549876 | Unassigned | Unassigned | Unassigned | 1104_0 | Clustered           | 154 VC_1104_0 | 154 | 0.8484 | 1          | 0.8484 | 0 | 0 | 0 | 1 Ref      |
| OP549877 | Unassigned | Unassigned | Unassigned | 1151_0 | Clustered           | 9 VC_1151_0   | 9   | 0.8548 | 1          | 0.8548 | 0 | 0 | 0 | 1 Ref      |
| OP549878 | Unassigned | Unassigned | Unassigned | 1476_0 | Clustered           | 2 VC_1476_0   | 2   | 1      | 1          | 1      | 0 | 0 | 0 | 1 Ref      |
| OP549879 | Unassigned | Unassigned | Unassigned | 1476_0 | Clustered           | 2 VC_1476_0   | 2   | 1      | 1          | 1      | 0 | 0 | 0 | 1 Ref      |
| OP549880 | Unassigned | Unassigned | Unassigned | 1477_0 | Clustered           | 3 VC_1477_0   | 3   | 1      | 1          | 1      | 0 | 0 | 0 | 1 Ref      |
| OP555980 | Unassigned | Unassigned | Unassigned | 283_4  | Clustered           | 5 VC_283_4    | 5   | 0.0112 | 0.99999969 | 0.0112 | 0 | 0 | 0 | 1 Ref      |
| OP555981 | Unassigned | Unassigned | Unassigned | 283_4  | Clustered           | 5 VC_283_4    | 5   | 0.0112 | 0.99999969 | 0.0112 | 0 | 0 | 0 | 1 Ref      |
| OP555982 | Unassigned | Unassigned | Unassigned | 283_4  | Clustered           | 5 VC_283_4    | 5   | 0.0112 | 0.99999969 | 0.0112 | 0 | 0 | 0 | 1 Ref      |
| OP556577 | Unassigned | Unassigned | Unassigned | 423_0  | Clustered           | 45 VC_423_0   | 45  | 0.9484 | 1          | 0.9484 | 0 | 0 | 0 | 1 Ref      |
| OP559177 | Unassigned | Unassigned | Unassigned | 695_0  | Clustered           | 48 VC_695_0   | 48  | 0.8162 | 1          | 0.8162 | 0 | 0 | 0 | 1 Ref      |
| OP559178 | Unassigned | Unassigned | Unassigned | 91_1   | Clustered/Singleton | 1 VC_91_1     | 1   | 0      | 1          | 0      | 0 | 0 | 0 | 1 Ref      |
| OP562383 | Unassigned | Unassigned | Unassigned | 847_1  | Clustered           | 26 VC_847_1   | 26  | 0.6323 | 1          | 0.6323 | 0 | 0 | 0 | 0.9815 Ref |
| OP572230 | Unassigned | Unassigned | Unassigned | 283_4  | Clustered           | 5 VC_283_4    | 5   | 0.0112 | 0.99999969 | 0.0112 | 0 | 0 | 0 | 1 Ref      |



|          |            |            |            |         |                     |              |     |        |            |        |   |   |   |            |
|----------|------------|------------|------------|---------|---------------------|--------------|-----|--------|------------|--------|---|---|---|------------|
| OP580516 | Unassigned | Unassigned | Unassigned | 1034_0  | Clustered           | 2 VC_1034_0  | 2   | 0.071  | 0.95326364 | 0.0677 | 0 | 0 | 0 | 1 Ref      |
| OP580517 | Unassigned | Unassigned | Unassigned | 1343_0  | Clustered           | 21 VC_1343_0 | 21  | 0.9843 | 1          | 0.9843 | 0 | 0 | 0 | 1 Ref      |
| OP580518 | Unassigned | Unassigned | Unassigned | 1344_0  | Clustered           | 78 VC_1344_0 | 78  | 0.9732 | 1          | 0.9732 | 0 | 0 | 0 | 1 Ref      |
| OP584903 | Unassigned | Unassigned | Unassigned | 8_0     | Clustered           | 58 VC_8_0    | 58  | 0.8306 | 1          | 0.8306 | 0 | 0 | 0 | 0.9946 Ref |
| OP584904 | Unassigned | Unassigned | Unassigned | 8_0     | Clustered           | 58 VC_8_0    | 58  | 0.8306 | 1          | 0.8306 | 0 | 0 | 0 | 0.9946 Ref |
| OP585103 | Unassigned | Unassigned | Unassigned | 492_1   | Clustered           | 20 VC_492_1  | 20  | 0.4176 | 1          | 0.4176 | 0 | 0 | 0 | 1 Ref      |
| OP585104 | Unassigned | Unassigned | Unassigned | 698_0   | Clustered           | 26 VC_698_0  | 26  | 0.9366 | 1          | 0.9366 | 0 | 0 | 0 | 1 Ref      |
| OP585105 | Unassigned | Unassigned | Unassigned | 700_0   | Clustered           | 10 VC_700_0  | 10  | 0.8076 | 1          | 0.8076 | 0 | 0 | 0 | 1 Ref      |
| OP595601 | Unassigned | Unassigned | Unassigned | 882_0   | Clustered           | 20 VC_882_0  | 20  | 0.9917 | 1          | 0.9917 | 0 | 0 | 0 | 1 Ref      |
| OP610151 | Unassigned | Unassigned | Unassigned | 133_22  | Clustered           | 13 VC_133_22 | 13  | 0.0804 | 1          | 0.0804 | 0 | 0 | 0 | 0.8205 Ref |
| OP611406 | Unassigned | Unassigned | Unassigned | 937_0   | Clustered           | 40 VC_937_0  | 40  | 0.6809 | 1          | 0.6809 | 0 | 0 | 0 | 0.9359 Ref |
| OP617560 | Unassigned | Unassigned | Unassigned | 83_0    | Clustered           | 6 VC_83_0    | 6   | 0.6436 | 1          | 0.6436 | 0 | 0 | 0 | 1 Ref      |
| OP617742 | Unassigned | Unassigned | Unassigned | 938_0   | Clustered           | 99 VC_938_0  | 99  | 0.9119 | 1          | 0.9119 | 0 | 0 | 0 | 0.9928 Ref |
| OP617743 | Unassigned | Unassigned | Unassigned | 848_1   | Clustered/Singleton | 1 VC_848_1   | 1   | 0      | 1          | 0      | 0 | 0 | 0 | 1 Ref      |
| OP617744 | Unassigned | Unassigned | Unassigned | 1049_0  | Clustered           | 8 VC_1049_0  | 8   | 0.6413 | 1          | 0.6413 | 0 | 0 | 0 | 1 Ref      |
| OP617745 | Unassigned | Unassigned | Unassigned | 164_10  | Clustered           | 5 VC_164_10  | 5   | 0.0615 | 0.96483582 | 0.0593 | 0 | 0 | 0 | 1 Ref      |
| OP617746 | Unassigned | Unassigned | Unassigned | 668_1   | Clustered/Singleton | 1 VC_668_1   | 1   | 0      | 1          | 0      | 0 | 0 | 0 | 1 Ref      |
| OP617747 | Unassigned | Unassigned | Unassigned | 385_0   | Clustered           | 51 VC_385_0  | 51  | 0.8754 | 1          | 0.8754 | 0 | 0 | 0 | 1 Ref      |
| OP617748 | Unassigned | Unassigned | Unassigned | 491_0   | Clustered           | 36 VC_491_0  | 36  | 0.5336 | 1          | 0.5336 | 0 | 0 | 0 | 0.9714 Ref |
| OP650937 | Unassigned | Unassigned | Unassigned | 300_0   | Clustered           | 3 VC_300_0   | 3   | 0.1218 | 0.99841701 | 0.1216 | 0 | 0 | 0 | 0.6667 Ref |
| OP684128 | Unassigned | Unassigned | Unassigned | 668_0   | Clustered           | 25 VC_668_0  | 25  | 0.5539 | 1          | 0.5539 | 0 | 0 | 0 | 0.96 Ref   |
| OU342754 | Unassigned | Unassigned | Unassigned | 823_0   | Clustered           | 124 VC_823_0 | 124 | 0.9492 | 1          | 0.9492 | 0 | 0 | 0 | 1 Ref      |
| OU342755 | Unassigned | Unassigned | Unassigned | 938_0   | Clustered           | 99 VC_938_0  | 99  | 0.9119 | 1          | 0.9119 | 0 | 0 | 0 | 0.9928 Ref |
| OU343167 | Unassigned | Unassigned | Unassigned | 344_1   | Clustered           | 3 VC_344_1   | 3   | 0.0359 | 0.93348877 | 0.0335 | 0 | 0 | 0 | 1 Ref      |
| OU509533 | Unassigned | Unassigned | Unassigned | 111_0   | Clustered           | 91 VC_111_0  | 91  | 0.9587 | 1          | 0.9587 | 0 | 0 | 0 | 1 Ref      |
| OU509534 | Unassigned | Unassigned | Unassigned | 111_0   | Clustered           | 91 VC_111_0  | 91  | 0.9587 | 1          | 0.9587 | 0 | 0 | 0 | 1 Ref      |
| OU509535 | Unassigned | Unassigned | Unassigned | 164_10  | Clustered           | 5 VC_164_10  | 5   | 0.0615 | 0.96483582 | 0.0593 | 0 | 0 | 0 | 1 Ref      |
| OU509536 | Unassigned | Unassigned | Unassigned | 491_0   | Clustered           | 36 VC_491_0  | 36  | 0.5336 | 1          | 0.5336 | 0 | 0 | 0 | 0.9714 Ref |
| OU734268 | Unassigned | Unassigned | Unassigned | 942_0   | Clustered           | 36 VC_942_0  | 36  | 0.7848 | 1          | 0.7848 | 0 | 0 | 0 | 1 Ref      |
| OU784549 | Unassigned | Unassigned | Unassigned | 228_0   | Clustered           | 60 VC_228_0  | 60  | 0.942  | 1          | 0.942  | 0 | 0 | 0 | 1 Ref      |
| OU784746 | Unassigned | Unassigned | Unassigned | 228_0   | Clustered           | 60 VC_228_0  | 60  | 0.942  | 1          | 0.942  | 0 | 0 | 0 | 1 Ref      |
| OU784750 | Unassigned | Unassigned | Unassigned | 228_0   | Clustered           | 60 VC_228_0  | 60  | 0.942  | 1          | 0.942  | 0 | 0 | 0 | 1 Ref      |
| OV032860 | Unassigned | Unassigned | Unassigned | 904_2   | Clustered           | 7 VC_904_2   | 7   | 0.2857 | 1          | 0.2857 | 0 | 0 | 0 | 1 Ref      |
| OV032902 | Unassigned | Unassigned | Unassigned | 346_2   | Clustered/Singleton | 1 VC_346_2   | 1   | 0      | 1          | 0      | 0 | 0 | 0 | 1 Ref      |
| OV049961 | Unassigned | Unassigned | Unassigned | 779_0   | Clustered           | 37 VC_779_0  | 37  | 0.5682 | 1          | 0.5682 | 0 | 0 | 0 | 1 Ref      |
| OV101294 | Unassigned | Unassigned | Unassigned | 772_19  | Clustered           | 16 VC_772_19 | 16  | 0.0975 | 0.9970466  | 0.0972 | 0 | 0 | 0 | 0.8083 Ref |
| OV121131 | Unassigned | Unassigned | Unassigned | 162_0   | Clustered           | 18 VC_162_0  | 18  | 0.7403 | 1          | 0.7403 | 0 | 0 | 0 | 0.8627 Ref |
| OV192280 | Unassigned | Unassigned | Unassigned | 228_0   | Clustered           | 60 VC_228_0  | 60  | 0.942  | 1          | 0.942  | 0 | 0 | 0 | 1 Ref      |
| OV696608 | Unassigned | Unassigned | Unassigned | 30_1    | Clustered           | 16 VC_30_1   | 16  | 0.1973 | 1          | 0.1973 | 0 | 0 | 0 | 0.8333 Ref |
| OV696610 | Unassigned | Unassigned | Unassigned | 51_0    | Clustered           | 10 VC_51_0   | 10  | 0.1741 | 1          | 0.1741 | 0 | 0 | 0 | 1 Ref      |
| OV696611 | Unassigned | Unassigned | Unassigned | 6_0     | Clustered           | 44 VC_6_0    | 44  | 0.908  | 1          | 0.908  | 0 | 0 | 0 | 1 Ref      |
| OV696612 | Unassigned | Unassigned | Unassigned | 43_0    | Clustered           | 38 VC_43_0   | 38  | 0.5885 | 1          | 0.5885 | 0 | 0 | 0 | 0.9659 Ref |
| OV696614 | Unassigned | Unassigned | Unassigned | 723_0   | Clustered           | 9 VC_723_0   | 9   | 0.7138 | 1          | 0.7138 | 0 | 0 | 0 | 1 Ref      |
| OV696617 | Unassigned | Unassigned | Unassigned | 744_0   | Clustered           | 10 VC_744_0  | 10  | 0.7049 | 1          | 0.7049 | 0 | 0 | 0 | 1 Ref      |
| OV696619 | Unassigned | Unassigned | Unassigned | 1159_0  | Clustered           | 3 VC_1159_0  | 3   | 0.3304 | 0.98548359 | 0.3256 | 0 | 0 | 0 | 1 Ref      |
| OV696621 | Unassigned | Unassigned | Unassigned | 861_0   | Clustered           | 9 VC_861_0   | 9   | 0.5869 | 1          | 0.5869 | 0 | 0 | 0 | 1 Ref      |
| OV754623 | Unassigned | Unassigned | Unassigned | 286_13  | Clustered           | 10 VC_286_13 | 10  | 0.0698 | 0.99999929 | 0.0698 | 0 | 0 | 0 | 0.9556 Ref |
| OV876900 | Unassigned | Unassigned | Unassigned | 283_140 | Clustered           | 2 VC_283_140 | 2   | 0.0028 | 0.93811915 | 0.0026 | 0 | 0 | 0 | 1 Ref      |
| OV876907 | Unassigned | Unassigned | Unassigned | 290_6   | Clustered           | 12 VC_290_6  | 12  | 0.1149 | 1          | 0.1149 | 0 | 0 | 0 | 0.8182 Ref |
| OV877085 | Unassigned | Unassigned | Unassigned | 283_140 | Clustered           | 2 VC_283_140 | 2   | 0.0028 | 0.93811915 | 0.0026 | 0 | 0 | 0 | 1 Ref      |
| OV877339 | Unassigned | Unassigned | Unassigned | 937_0   | Clustered           | 40 VC_937_0  | 40  | 0.6809 | 1          | 0.6809 | 0 | 0 | 0 | 0.9359 Ref |
| OV877387 | Unassigned | Unassigned | Unassigned | 937_0   | Clustered           | 40 VC_937_0  | 40  | 0.6809 | 1          | 0.6809 | 0 | 0 | 0 | 0.9359 Ref |
| OV877511 | Unassigned | Unassigned | Unassigned | 286_13  | Clustered           | 10 VC_286_13 | 10  | 0.0698 | 0.99999929 | 0.0698 | 0 | 0 | 0 | 0.9556 Ref |
| OV877765 | Unassigned | Unassigned | Unassigned | 290_6   | Clustered           | 12 VC_290_6  | 12  | 0.1149 | 1          | 0.1149 | 0 | 0 | 0 | 0.8182 Ref |
| OV877766 | Unassigned | Unassigned | Unassigned | 937_0   | Clustered           | 40 VC_937_0  | 40  | 0.6809 | 1          | 0.6809 | 0 | 0 | 0 | 0.9359 Ref |
| OW251746 | Unassigned | Unassigned | Unassigned | 938_0   | Clustered           | 99 VC_938_0  | 99  | 0.9119 | 1          | 0.9119 | 0 | 0 | 0 | 0.9928 Ref |
| OW991345 | Unassigned | Unassigned | Unassigned | 779_0   | Clustered           | 37 VC_779_0  | 37  | 0.5682 | 1          | 0.5682 | 0 | 0 | 0 | 1 Ref      |
| OX001802 | Unassigned | Unassigned | Unassigned | 590_0   | Clustered           | 27 VC_590_0  | 27  | 0.9947 | 1          | 0.9947 | 0 | 0 | 0 | 1 Ref      |
| OX016465 | Unassigned | Unassigned | Unassigned | 329_3   | Clustered           | 24 VC_329_3  | 24  | 0.1206 | 1          | 0.1206 | 0 | 0 | 0 | 0.7283 Ref |
| OX090893 | Unassigned | Unassigned | Unassigned | 848_0   | Clustered           | 28 VC_848_0  | 28  | 0.7927 | 1          | 0.7927 | 0 | 0 | 0 | 1 Ref      |
| OX241425 | Unassigned | Unassigned | Unassigned | 115_0   | Clustered           | 2 VC_115_0   | 2   | 0.4117 | 0.90744399 | 0.3736 | 0 | 0 | 0 | 1 Ref      |
| OX241426 | Unassigned | Unassigned | Unassigned | 501_0   | Clustered           | 16 VC_501_0  | 16  | 0.9985 | 1          | 0.9985 | 0 | 0 | 0 | 1 Ref      |
| OX241427 | Unassigned | Unassigned | Unassigned | 1050_1  | Clustered           | 29 VC_1050_1 | 29  | 0.4861 | 1          | 0.4861 | 0 | 0 | 0 | 0.9581 Ref |
| OX241428 | Unassigned | Unassigned | Unassigned | 501_0   | Clustered           | 16 VC_501_0  | 16  | 0.9985 | 1          | 0.9985 | 0 | 0 | 0 | 1 Ref      |
| OX241429 | Unassigned | Unassigned | Unassigned | 646_0   | Clustered           | 29 VC_646_0  | 29  | 0.9131 | 1          | 0.9131 | 0 | 0 | 0 | 1 Ref      |
| OX241430 | Unassigned | Unassigned | Unassigned | 501_0   | Clustered           | 16 VC_501_0  | 16  | 0.9985 | 1          | 0.9985 | 0 | 0 | 0 | 1 Ref      |
| OX241431 | Unassigned | Unassigned | Unassigned | 501_0   | Clustered           | 16 VC_501_0  | 16  | 0.9985 | 1          | 0.9985 | 0 | 0 | 0 | 1 Ref      |
| OX241432 | Unassigned | Unassigned | Unassigned | 501_0   | Clustered           | 16 VC_501_0  | 16  | 0.9985 | 1          | 0.9985 | 0 | 0 | 0 | 1 Ref      |
| OX241434 | Unassigned | Unassigned | Unassigned | 903_0   | Clustered           | 7 VC_903_0   | 7   | 0.7377 | 1          | 0.7377 | 0 | 0 | 0 | 1 Ref      |
| OX241435 | Unassigned | Unassigned | Unassigned | 758_0   | Clustered           | 18 VC_758_0  | 18  | 0.738  | 1          | 0.738  | 0 | 0 | 0 | 1 Ref      |
| OX241436 | Unassigned | Unassigned | Unassigned | 758_0   | Clustered           | 18 VC_758_0  | 18  | 0.738  | 1          | 0.738  | 0 | 0 | 0 | 1 Ref      |
| OX241437 | Unassigned | Unassigned | Unassigned | 493_3   | Clustered/Singleton | 1 VC_493_3   | 1   | 0      | 1          | 0      | 0 | 0 | 0 | 1 Ref      |
| OX241438 | Unassigned | Unassigned | Unassigned | 646_0   | Clustered           | 29 VC_646_0  | 29  | 0.9131 | 1          | 0.9131 | 0 | 0 | 0 | 1 Ref      |
| OX241441 | Unassigned | Unassigned | Unassigned | 501_0   | Clustered           | 16 VC_501_0  | 16  | 0.9985 | 1          | 0.9985 | 0 | 0 | 0 | 1 Ref      |
| OX241445 | Unassigned | Unassigned | Unassigned | 758_0   | Clustered           | 18 VC_758_0  | 18  | 0.738  | 1          | 0.738  | 0 | 0 | 0 | 1 Ref      |
| OX241446 | Unassigned | Unassigned | Unassigned | 758_0   | Clustered           | 18 VC_758_0  | 18  | 0.738  | 1          | 0.738  | 0 | 0 | 0 | 1 Ref      |
| OX241447 | Unassigned | Unassigned | Unassigned | 758_0   | Clustered           | 18 VC_758_0  | 18  | 0.738  | 1          | 0.738  | 0 | 0 | 0 | 1 Ref      |
| OX241448 | Unassigned | Unassigned | Unassigned | 501_0   | Clustered           | 16 VC_501_0  | 16  | 0.9985 | 1          | 0.9985 | 0 | 0 | 0 | 1 Ref      |
| OX241449 | Unassigned | Unassigned | Unassigned | 501_0   | Clustered           | 16 VC_501_0  | 16  | 0.9985 | 1          | 0.9985 | 0 | 0 | 0 | 1 Ref      |
| OX241455 | Unassigned | Unassigned | Unassigned | 493_4   | Clustered/Singleton | 1 VC_493_4   | 1   | 0      | 1          | 0      | 0 | 0 | 0 | 1 Ref      |
| OX241494 | Unassigned | Unassigned | Unassigned | 501_0   | Clustered           | 16 VC_501_0  | 16  | 0.9985 | 1          | 0.9985 | 0 | 0 | 0 | 1 Ref      |



|          |            |            |            |        |                     |              |     |        |            |        |   |   |   |            |
|----------|------------|------------|------------|--------|---------------------|--------------|-----|--------|------------|--------|---|---|---|------------|
| OX241498 | Unassigned | Unassigned | Unassigned | 646_0  | Clustered           | 29 VC_646_0  | 29  | 0.9131 | 1          | 0.9131 | 0 | 0 | 0 | 1 Ref      |
| OX241501 | Unassigned | Unassigned | Unassigned | 758_0  | Clustered           | 18 VC_758_0  | 18  | 0.738  | 1          | 0.738  | 0 | 0 | 0 | 1 Ref      |
| OX241504 | Unassigned | Unassigned | Unassigned | 758_0  | Clustered           | 18 VC_758_0  | 18  | 0.738  | 1          | 0.738  | 0 | 0 | 0 | 1 Ref      |
| OX241556 | Unassigned | Unassigned | Unassigned | 1050_1 | Clustered           | 29 VC_1050_1 | 29  | 0.4861 | 1          | 0.4861 | 0 | 0 | 0 | 0.9581 Ref |
| OX241557 | Unassigned | Unassigned | Unassigned | 646_0  | Clustered           | 29 VC_646_0  | 29  | 0.9131 | 1          | 0.9131 | 0 | 0 | 0 | 1 Ref      |
| OX241558 | Unassigned | Unassigned | Unassigned | 646_0  | Clustered           | 29 VC_646_0  | 29  | 0.9131 | 1          | 0.9131 | 0 | 0 | 0 | 1 Ref      |
| OX241559 | Unassigned | Unassigned | Unassigned | 758_0  | Clustered           | 18 VC_758_0  | 18  | 0.738  | 1          | 0.738  | 0 | 0 | 0 | 1 Ref      |
| OX241560 | Unassigned | Unassigned | Unassigned | 758_0  | Clustered           | 18 VC_758_0  | 18  | 0.738  | 1          | 0.738  | 0 | 0 | 0 | 1 Ref      |
| OX241561 | Unassigned | Unassigned | Unassigned | 1041_0 | Clustered           | 9 VC_1041_0  | 9   | 0.6541 | 1          | 0.6541 | 0 | 0 | 0 | 1 Ref      |
| OX241562 | Unassigned | Unassigned | Unassigned | 478_0  | Clustered           | 2 VC_478_0   | 2   | 0.3505 | 0.94766489 | 0.3321 | 0 | 0 | 0 | 1 Ref      |
| OX241563 | Unassigned | Unassigned | Unassigned | 1050_1 | Clustered           | 29 VC_1050_1 | 29  | 0.4861 | 1          | 0.4861 | 0 | 0 | 0 | 0.9581 Ref |
| OX241566 | Unassigned | Unassigned | Unassigned | 926_0  | Clustered           | 3 VC_926_0   | 3   | 0.9445 | 0.99430386 | 0.9391 | 0 | 0 | 0 | 1 Ref      |
| OX241567 | Unassigned | Unassigned | Unassigned | 501_0  | Clustered           | 16 VC_501_0  | 16  | 0.9985 | 1          | 0.9985 | 0 | 0 | 0 | 1 Ref      |
| OX241568 | Unassigned | Unassigned | Unassigned | 501_0  | Clustered           | 16 VC_501_0  | 16  | 0.9985 | 1          | 0.9985 | 0 | 0 | 0 | 1 Ref      |
| OX241569 | Unassigned | Unassigned | Unassigned | 1041_0 | Clustered           | 9 VC_1041_0  | 9   | 0.6541 | 1          | 0.6541 | 0 | 0 | 0 | 1 Ref      |
| OX241570 | Unassigned | Unassigned | Unassigned | 926_0  | Clustered           | 3 VC_926_0   | 3   | 0.9445 | 0.99430386 | 0.9391 | 0 | 0 | 0 | 1 Ref      |
| OX241572 | Unassigned | Unassigned | Unassigned | 175_0  | Clustered           | 4 VC_175_0   | 4   | 0.3847 | 0.99998259 | 0.3846 | 0 | 0 | 0 | 1 Ref      |
| OX241573 | Unassigned | Unassigned | Unassigned | 642_5  | Clustered           | 4 VC_642_5   | 4   | 0.0902 | 0.99996664 | 0.0902 | 0 | 0 | 0 | 1 Ref      |
| OX241574 | Unassigned | Unassigned | Unassigned | 642_1  | Clustered/Singleton | 1 VC_642_1   | 1   | 0      | 1          | 0      | 0 | 0 | 0 | 1 Ref      |
| OX241575 | Unassigned | Unassigned | Unassigned | 646_0  | Clustered           | 29 VC_646_0  | 29  | 0.9131 | 1          | 0.9131 | 0 | 0 | 0 | 1 Ref      |
| OX241591 | Unassigned | Unassigned | Unassigned | 646_0  | Clustered           | 29 VC_646_0  | 29  | 0.9131 | 1          | 0.9131 | 0 | 0 | 0 | 1 Ref      |
| OX335359 | Unassigned | Unassigned | Unassigned | 823_0  | Clustered           | 124 VC_823_0 | 124 | 0.9492 | 1          | 0.9492 | 0 | 0 | 0 | 1 Ref      |
| OX335360 | Unassigned | Unassigned | Unassigned | 823_0  | Clustered           | 124 VC_823_0 | 124 | 0.9492 | 1          | 0.9492 | 0 | 0 | 0 | 1 Ref      |
| OX335361 | Unassigned | Unassigned | Unassigned | 937_0  | Clustered           | 40 VC_937_0  | 40  | 0.6809 | 1          | 0.6809 | 0 | 0 | 0 | 0.9359 Ref |
| OX335369 | Unassigned | Unassigned | Unassigned | 938_0  | Clustered           | 99 VC_938_0  | 99  | 0.9119 | 1          | 0.9119 | 0 | 0 | 0 | 0.9928 Ref |
| OX335370 | Unassigned | Unassigned | Unassigned | 938_0  | Clustered           | 99 VC_938_0  | 99  | 0.9119 | 1          | 0.9119 | 0 | 0 | 0 | 0.9928 Ref |
| OX335371 | Unassigned | Unassigned | Unassigned | 938_0  | Clustered           | 99 VC_938_0  | 99  | 0.9119 | 1          | 0.9119 | 0 | 0 | 0 | 0.9928 Ref |
| OX335375 | Unassigned | Unassigned | Unassigned | 823_0  | Clustered           | 124 VC_823_0 | 124 | 0.9492 | 1          | 0.9492 | 0 | 0 | 0 | 1 Ref      |
| OX335376 | Unassigned | Unassigned | Unassigned | 823_0  | Clustered           | 124 VC_823_0 | 124 | 0.9492 | 1          | 0.9492 | 0 | 0 | 0 | 1 Ref      |
| OX335377 | Unassigned | Unassigned | Unassigned | 823_0  | Clustered           | 124 VC_823_0 | 124 | 0.9492 | 1          | 0.9492 | 0 | 0 | 0 | 1 Ref      |
| OX335378 | Unassigned | Unassigned | Unassigned | 388_0  | Clustered           | 4 VC_388_0   | 4   | 0.0345 | 0.99998812 | 0.0345 | 0 | 0 | 0 | 1 Ref      |
| OX335379 | Unassigned | Unassigned | Unassigned | 111_0  | Clustered           | 91 VC_111_0  | 91  | 0.9587 | 1          | 0.9587 | 0 | 0 | 0 | 1 Ref      |
| OX335380 | Unassigned | Unassigned | Unassigned | 938_0  | Clustered           | 99 VC_938_0  | 99  | 0.9119 | 1          | 0.9119 | 0 | 0 | 0 | 0.9928 Ref |
| OX335381 | Unassigned | Unassigned | Unassigned | 938_0  | Clustered           | 99 VC_938_0  | 99  | 0.9119 | 1          | 0.9119 | 0 | 0 | 0 | 0.9928 Ref |
| OX335382 | Unassigned | Unassigned | Unassigned | 452_0  | Clustered           | 66 VC_452_0  | 66  | 0.9248 | 1          | 0.9248 | 0 | 0 | 0 | 1 Ref      |
| OX335383 | Unassigned | Unassigned | Unassigned | 938_0  | Clustered           | 99 VC_938_0  | 99  | 0.9119 | 1          | 0.9119 | 0 | 0 | 0 | 0.9928 Ref |
| OX335384 | Unassigned | Unassigned | Unassigned | 938_0  | Clustered           | 99 VC_938_0  | 99  | 0.9119 | 1          | 0.9119 | 0 | 0 | 0 | 0.9928 Ref |
| OX335385 | Unassigned | Unassigned | Unassigned | 938_0  | Clustered           | 99 VC_938_0  | 99  | 0.9119 | 1          | 0.9119 | 0 | 0 | 0 | 0.9928 Ref |
| OX335386 | Unassigned | Unassigned | Unassigned | 938_0  | Clustered           | 99 VC_938_0  | 99  | 0.9119 | 1          | 0.9119 | 0 | 0 | 0 | 0.9928 Ref |
| OX335387 | Unassigned | Unassigned | Unassigned | 938_0  | Clustered           | 99 VC_938_0  | 99  | 0.9119 | 1          | 0.9119 | 0 | 0 | 0 | 0.9928 Ref |
| OX335388 | Unassigned | Unassigned | Unassigned | 938_0  | Clustered           | 99 VC_938_0  | 99  | 0.9119 | 1          | 0.9119 | 0 | 0 | 0 | 0.9928 Ref |
| OX335389 | Unassigned | Unassigned | Unassigned | 823_0  | Clustered           | 124 VC_823_0 | 124 | 0.9492 | 1          | 0.9492 | 0 | 0 | 0 | 1 Ref      |
| OX335390 | Unassigned | Unassigned | Unassigned | 823_0  | Clustered           | 124 VC_823_0 | 124 | 0.9492 | 1          | 0.9492 | 0 | 0 | 0 | 1 Ref      |
| OX335391 | Unassigned | Unassigned | Unassigned | 938_0  | Clustered           | 99 VC_938_0  | 99  | 0.9119 | 1          | 0.9119 | 0 | 0 | 0 | 0.9928 Ref |
| OX335392 | Unassigned | Unassigned | Unassigned | 823_0  | Clustered           | 124 VC_823_0 | 124 | 0.9492 | 1          | 0.9492 | 0 | 0 | 0 | 1 Ref      |
| OX335393 | Unassigned | Unassigned | Unassigned | 938_0  | Clustered           | 99 VC_938_0  | 99  | 0.9119 | 1          | 0.9119 | 0 | 0 | 0 | 0.9928 Ref |
| OX335394 | Unassigned | Unassigned | Unassigned | 823_0  | Clustered           | 124 VC_823_0 | 124 | 0.9492 | 1          | 0.9492 | 0 | 0 | 0 | 1 Ref      |
| OX335395 | Unassigned | Unassigned | Unassigned | 937_0  | Clustered           | 40 VC_937_0  | 40  | 0.6809 | 1          | 0.6809 | 0 | 0 | 0 | 0.9359 Ref |
| OX335396 | Unassigned | Unassigned | Unassigned | 668_0  | Clustered           | 25 VC_668_0  | 25  | 0.5539 | 1          | 0.5539 | 0 | 0 | 0 | 0.96 Ref   |
| OX335398 | Unassigned | Unassigned | Unassigned | 823_0  | Clustered           | 124 VC_823_0 | 124 | 0.9492 | 1          | 0.9492 | 0 | 0 | 0 | 1 Ref      |
| OX335400 | Unassigned | Unassigned | Unassigned | 938_0  | Clustered           | 99 VC_938_0  | 99  | 0.9119 | 1          | 0.9119 | 0 | 0 | 0 | 0.9928 Ref |
| OX335401 | Unassigned | Unassigned | Unassigned | 823_0  | Clustered           | 124 VC_823_0 | 124 | 0.9492 | 1          | 0.9492 | 0 | 0 | 0 | 1 Ref      |
| OX335402 | Unassigned | Unassigned | Unassigned | 132_1  | Clustered           | 17 VC_132_1  | 17  | 0.1738 | 1          | 0.1738 | 0 | 0 | 0 | 0.9853 Ref |
| OX335403 | Unassigned | Unassigned | Unassigned | 132_1  | Clustered           | 17 VC_132_1  | 17  | 0.1738 | 1          | 0.1738 | 0 | 0 | 0 | 0.9853 Ref |
| OX335404 | Unassigned | Unassigned | Unassigned | 938_0  | Clustered           | 99 VC_938_0  | 99  | 0.9119 | 1          | 0.9119 | 0 | 0 | 0 | 0.9928 Ref |
| OX335405 | Unassigned | Unassigned | Unassigned | 132_1  | Clustered           | 17 VC_132_1  | 17  | 0.1738 | 1          | 0.1738 | 0 | 0 | 0 | 0.9853 Ref |
| OX335407 | Unassigned | Unassigned | Unassigned | 668_0  | Clustered           | 25 VC_668_0  | 25  | 0.5539 | 1          | 0.5539 | 0 | 0 | 0 | 0.96 Ref   |
| OX335408 | Unassigned | Unassigned | Unassigned | 823_0  | Clustered           | 124 VC_823_0 | 124 | 0.9492 | 1          | 0.9492 | 0 | 0 | 0 | 1 Ref      |
| OX335409 | Unassigned | Unassigned | Unassigned | 823_0  | Clustered           | 124 VC_823_0 | 124 | 0.9492 | 1          | 0.9492 | 0 | 0 | 0 | 1 Ref      |
| OX335410 | Unassigned | Unassigned | Unassigned | 937_0  | Clustered           | 40 VC_937_0  | 40  | 0.6809 | 1          | 0.6809 | 0 | 0 | 0 | 0.9359 Ref |
| OX335411 | Unassigned | Unassigned | Unassigned | 938_0  | Clustered           | 99 VC_938_0  | 99  | 0.9119 | 1          | 0.9119 | 0 | 0 | 0 | 0.9928 Ref |
| OX335412 | Unassigned | Unassigned | Unassigned | 938_0  | Clustered           | 99 VC_938_0  | 99  | 0.9119 | 1          | 0.9119 | 0 | 0 | 0 | 0.9928 Ref |
| OX335413 | Unassigned | Unassigned | Unassigned | 823_0  | Clustered           | 124 VC_823_0 | 124 | 0.9492 | 1          | 0.9492 | 0 | 0 | 0 | 1 Ref      |
| OX335414 | Unassigned | Unassigned | Unassigned | 823_0  | Clustered           | 124 VC_823_0 | 124 | 0.9492 | 1          | 0.9492 | 0 | 0 | 0 | 1 Ref      |
| OX335416 | Unassigned | Unassigned | Unassigned | 132_1  | Clustered           | 17 VC_132_1  | 17  | 0.1738 | 1          | 0.1738 | 0 | 0 | 0 | 0.9853 Ref |
| OX335417 | Unassigned | Unassigned | Unassigned | 938_0  | Clustered           | 99 VC_938_0  | 99  | 0.9119 | 1          | 0.9119 | 0 | 0 | 0 | 0.9928 Ref |
| OX335418 | Unassigned | Unassigned | Unassigned | 823_0  | Clustered           | 124 VC_823_0 | 124 | 0.9492 | 1          | 0.9492 | 0 | 0 | 0 | 1 Ref      |
| OX335419 | Unassigned | Unassigned | Unassigned | 385_0  | Clustered           | 51 VC_385_0  | 51  | 0.8754 | 1          | 0.8754 | 0 | 0 | 0 | 1 Ref      |
| OX335420 | Unassigned | Unassigned | Unassigned | 385_0  | Clustered           | 51 VC_385_0  | 51  | 0.8754 | 1          | 0.8754 | 0 | 0 | 0 | 1 Ref      |
| OX335421 | Unassigned | Unassigned | Unassigned | 938_0  | Clustered           | 99 VC_938_0  | 99  | 0.9119 | 1          | 0.9119 | 0 | 0 | 0 | 0.9928 Ref |
| OX335422 | Unassigned | Unassigned | Unassigned | 938_0  | Clustered           | 99 VC_938_0  | 99  | 0.9119 | 1          | 0.9119 | 0 | 0 | 0 | 0.9928 Ref |
| OX335423 | Unassigned | Unassigned | Unassigned | 938_0  | Clustered           | 99 VC_938_0  | 99  | 0.9119 | 1          | 0.9119 | 0 | 0 | 0 | 0.9928 Ref |
| OX335426 | Unassigned | Unassigned | Unassigned | 823_0  | Clustered           | 124 VC_823_0 | 124 | 0.9492 | 1          | 0.9492 | 0 | 0 | 0 | 1 Ref      |
| OX335427 | Unassigned | Unassigned | Unassigned | 823_0  | Clustered           | 124 VC_823_0 | 124 | 0.9492 | 1          | 0.9492 | 0 | 0 | 0 | 1 Ref      |
| OX335428 | Unassigned | Unassigned | Unassigned | 111_0  | Clustered           | 91 VC_111_0  | 91  | 0.9587 | 1          | 0.9587 | 0 | 0 | 0 | 1 Ref      |
| OX335429 | Unassigned | Unassigned | Unassigned | 938_0  | Clustered           | 99 VC_938_0  | 99  | 0.9119 | 1          | 0.9119 | 0 | 0 | 0 | 0.9928 Ref |
| OX335430 | Unassigned | Unassigned | Unassigned | 938_0  | Clustered           | 99 VC_938_0  | 99  | 0.9119 | 1          | 0.9119 | 0 | 0 | 0 | 0.9928 Ref |
| OX335431 | Unassigned | Unassigned | Unassigned | 385_0  | Clustered           | 51 VC_385_0  | 51  | 0.8754 | 1          | 0.8754 | 0 | 0 | 0 | 1 Ref      |
| OX335432 | Unassigned | Unassigned | Unassigned | 938_0  | Clustered           | 99 VC_938_0  | 99  | 0.9119 | 1          | 0.9119 | 0 | 0 | 0 | 0.9928 Ref |
| OX335433 | Unassigned | Unassigned | Unassigned | 823_0  | Clustered           | 124 VC_823_0 | 124 | 0.9492 | 1          | 0.9492 | 0 | 0 | 0 | 1 Ref      |
| OX335434 | Unassigned | Unassigned | Unassigned | 385_0  | Clustered           | 51 VC_385_0  | 51  | 0.8754 | 1          | 0.8754 | 0 | 0 | 0 | 1 Ref      |



|                         |            |            |            |        |                     |              |     |        |            |        |   |   |   |        |     |
|-------------------------|------------|------------|------------|--------|---------------------|--------------|-----|--------|------------|--------|---|---|---|--------|-----|
| OX335435                | Unassigned | Unassigned | Unassigned | 938_0  | Clustered           | 99 VC_938_0  | 99  | 0.9119 | 1          | 0.9119 | 0 | 0 | 0 | 0.9928 | Ref |
| OX335437                | Unassigned | Unassigned | Unassigned | 385_0  | Clustered           | 51 VC_385_0  | 51  | 0.8754 | 1          | 0.8754 | 0 | 0 | 0 | 1      | Ref |
| OX335438                | Unassigned | Unassigned | Unassigned | 823_0  | Clustered           | 124 VC_823_0 | 124 | 0.9492 | 1          | 0.9492 | 0 | 0 | 0 | 1      | Ref |
| OX335439                | Unassigned | Unassigned | Unassigned | 938_0  | Clustered           | 99 VC_938_0  | 99  | 0.9119 | 1          | 0.9119 | 0 | 0 | 0 | 0.9928 | Ref |
| OX335440                | Unassigned | Unassigned | Unassigned | 823_0  | Clustered           | 124 VC_823_0 | 124 | 0.9492 | 1          | 0.9492 | 0 | 0 | 0 | 1      | Ref |
| OX335441                | Unassigned | Unassigned | Unassigned | 388_0  | Clustered           | 4 VC_388_0   | 4   | 0.0345 | 0.99998812 | 0.0345 | 0 | 0 | 0 | 1      | Ref |
| OX335443                | Unassigned | Unassigned | Unassigned | 823_0  | Clustered           | 124 VC_823_0 | 124 | 0.9492 | 1          | 0.9492 | 0 | 0 | 0 | 1      | Ref |
| PF3COMN                 | Unassigned | Unassigned | Unassigned | 1478_0 | Clustered           | 2 VC_1478_0  | 2   | 1      | 1          | 1      | 0 | 0 | 0 | 1      | Ref |
| PF3COMNY                | Unassigned | Unassigned | Unassigned | 1478_0 | Clustered           | 2 VC_1478_0  | 2   | 1      | 1          | 1      | 0 | 0 | 0 | 1      | Ref |
| PFDG                    | Unassigned | Unassigned | Unassigned | 61_0   | Clustered           | 12 VC_61_0   | 12  | 0.7633 | 1          | 0.7633 | 0 | 0 | 0 | 1      | Ref |
| PX1CG                   | Unassigned | Unassigned | Unassigned | 303_0  | Clustered           | 155 VC_303_0 | 155 | 0.9979 | 1          | 0.9979 | 0 | 0 | 0 | 1      | Ref |
| PZACG                   | Unassigned | Unassigned | Unassigned | 817_0  | Clustered           | 14 VC_817_0  | 14  | 0.6342 | 1          | 0.6342 | 0 | 0 | 0 | 1      | Ref |
| SI-wms-combined_107073  | Unassigned | Unassigned | Unassigned | 610_0  | Clustered           | 4 VC_610_0   | 4   | 0.8779 | 0.9998533  | 0.8778 | 0 | 0 | 0 | 1      | ME  |
| SI-wms-combined_118167  | Unassigned | Unassigned | Unassigned | 825_0  | Clustered           | 7 VC_825_0   | 7   | 0.5674 | 1          | 0.5674 | 0 | 0 | 0 | 0.8571 | ME  |
| SI-wms-combined_120533  | Unassigned | Unassigned | Unassigned | 1481_0 | Clustered           | 9 VC_1481_0  | 9   | 0.9416 | 0.77917309 | 0.7337 | 0 | 0 | 0 | 1      | ME  |
| SI-wms-combined_132934  | Unassigned | Unassigned | Unassigned | 707_0  | Clustered           | 6 VC_707_0   | 6   | 0.2616 | 1          | 0.2616 | 0 | 0 | 0 | 0.8667 | ME  |
| SI-wms-combined_151708  | Unassigned | Unassigned | Unassigned | 1484_0 | Clustered           | 10 VC_1484_0 | 10  | 0.6918 | 0.99999998 | 0.6918 | 0 | 0 | 0 | 0.8889 | ME  |
| SI-wms-combined_156637  | Unassigned | Unassigned | Unassigned | 1487_0 | Clustered           | 2 VC_1487_0  | 2   | 1      | 1          | 1      | 0 | 0 | 0 | 1      | ME  |
| SI-wms-combined_159544  | Unassigned | Unassigned | Unassigned | 5_0    | Clustered           | 30 VC_5_0    | 30  | 0.9647 | 1          | 0.9647 | 0 | 0 | 0 | 1      | ME  |
| SI-wms-combined_164485  | Unassigned | Unassigned | Unassigned | 1484_0 | Clustered           | 10 VC_1484_0 | 10  | 0.6918 | 0.99999998 | 0.6918 | 0 | 0 | 0 | 0.8889 | ME  |
| SI-wms-combined_169879  | Unassigned | Unassigned | Unassigned | 825_0  | Clustered           | 7 VC_825_0   | 7   | 0.5674 | 1          | 0.5674 | 0 | 0 | 0 | 0.8571 | ME  |
| SI-wms-combined_185336  | Unassigned | Unassigned | Unassigned | 1491_0 | Clustered           | 2 VC_1491_0  | 2   | 1      | 1          | 1      | 0 | 0 | 0 | 1      | ME  |
| SI-wms-combined_19031   | Unassigned | Unassigned | Unassigned | 181_0  | Clustered           | 5 VC_181_0   | 5   | 0.1168 | 0.99999995 | 0.1168 | 0 | 0 | 0 | 1      | ME  |
| SI-wms-combined_197401  | Unassigned | Unassigned | Unassigned | 1408_0 | Clustered           | 2 VC_1408_0  | 2   | 0.1695 | 0.59870633 | 0.1015 | 0 | 0 | 0 | 1      | ME  |
| SI-wms-combined_220022  | Unassigned | Unassigned | Unassigned | 1408_1 | Clustered/Singleton | 1 VC_1408_1  | 1   | 0      | 1          | 0      | 0 | 0 | 0 | 1      | ME  |
| SI-wms-combined_224578  | Unassigned | Unassigned | Unassigned | 418_0  | Clustered           | 6 VC_418_0   | 6   | 0.4575 | 0.9999995  | 0.4575 | 0 | 0 | 0 | 0.8    | ME  |
| SI-wms-combined_23248   | Unassigned | Unassigned | Unassigned | 621_0  | Clustered           | 7 VC_621_0   | 7   | 0.5783 | 1          | 0.5783 | 0 | 0 | 0 | 1      | ME  |
| SI-wms-combined_246923  | Unassigned | Unassigned | Unassigned | 679_0  | Clustered           | 4 VC_679_0   | 4   | 0.2754 | 0.9999774  | 0.2754 | 0 | 0 | 0 | 1      | ME  |
| SI-wms-combined_248622  | Unassigned | Unassigned | Unassigned | 1494_0 | Clustered           | 2 VC_1494_0  | 2   | 0.9538 | 0.5        | 0.4769 | 0 | 0 | 0 | 1      | ME  |
| SI-wms-combined_263562  | Unassigned | Unassigned | Unassigned | 1437_0 | Clustered           | 3 VC_1437_0  | 3   | 0.742  | 0.99188498 | 0.7359 | 0 | 0 | 0 | 1      | ME  |
| SI-wms-combined_302166  | Unassigned | Unassigned | Unassigned | 715_0  | Clustered           | 3 VC_715_0   | 3   | 0.2991 | 0.99813417 | 0.2985 | 0 | 0 | 0 | 1      | ME  |
| SI-wms-combined_304377  | Unassigned | Unassigned | Unassigned | 804_0  | Clustered           | 2 VC_804_0   | 2   | 0.0559 | 0.95690755 | 0.0535 | 0 | 0 | 0 | 1      | ME  |
| SI-wms-combined_307323  | Unassigned | Unassigned | Unassigned | 798_0  | Clustered           | 2 VC_798_0   | 2   | 0.1818 | 0.94346013 | 0.1715 | 0 | 0 | 0 | 1      | ME  |
| SI-wms-combined_313851  | Unassigned | Unassigned | Unassigned | 1496_0 | Clustered           | 5 VC_1496_0  | 5   | 0.9228 | 0.98875286 | 0.9124 | 0 | 0 | 0 | 1      | ME  |
| SI-wms-combined_324053  | Unassigned | Unassigned | Unassigned | 427_0  | Clustered           | 3 VC_427_0   | 3   | 0.0627 | 0.96830121 | 0.0608 | 0 | 0 | 0 | 1      | ME  |
| SI-wms-combined_331544  | Unassigned | Unassigned | Unassigned | 1497_0 | Clustered           | 3 VC_1497_0  | 3   | 1      | 1          | 1      | 0 | 0 | 0 | 1      | ME  |
| SI-wms-combined_331896  | Unassigned | Unassigned | Unassigned | 1481_0 | Clustered           | 9 VC_1481_0  | 9   | 0.9416 | 0.77917309 | 0.7337 | 0 | 0 | 0 | 1      | ME  |
| SI-wms-combined_332236  | Unassigned | Unassigned | Unassigned | 626_0  | Clustered           | 23 VC_626_0  | 23  | 0.66   | 1          | 0.66   | 0 | 0 | 0 | 0.8379 | ME  |
| SI-wms-combined_340558  | Unassigned | Unassigned | Unassigned | 679_0  | Clustered           | 4 VC_679_0   | 4   | 0.2754 | 0.9999774  | 0.2754 | 0 | 0 | 0 | 1      | ME  |
| SI-wms-combined_353757  | Unassigned | Unassigned | Unassigned | 650_0  | Clustered           | 10 VC_650_0  | 10  | 0.4538 | 1          | 0.4538 | 0 | 0 | 0 | 1      | ME  |
| SI-wms-combined_354899  | Unassigned | Unassigned | Unassigned | 1498_0 | Clustered           | 2 VC_1498_0  | 2   | 0.9131 | 0.5        | 0.4566 | 0 | 0 | 0 | 1      | ME  |
| SI-wms-combined_357373  | Unassigned | Unassigned | Unassigned | 1243_0 | Clustered           | 52 VC_1243_0 | 52  | 0.9126 | 0.92708311 | 0.8461 | 0 | 0 | 0 | 1      | ME  |
| SI-wms-combined_360285  | Unassigned | Unassigned | Unassigned | 716_0  | Clustered           | 2 VC_716_0   | 2   | 0.1025 | 0.95462977 | 0.0978 | 0 | 0 | 0 | 1      | ME  |
| SI-wms-combined_394574  | Unassigned | Unassigned | Unassigned | 831_0  | Clustered           | 5 VC_831_0   | 5   | 0.4369 | 0.99999952 | 0.4369 | 0 | 0 | 0 | 1      | ME  |
| SI-wms-combined_394628  | Unassigned | Unassigned | Unassigned | 1500_0 | Clustered           | 2 VC_1500_0  | 2   | 0.9749 | 0.5        | 0.4875 | 0 | 0 | 0 | 1      | ME  |
| SI-wms-combined_40115   | Unassigned | Unassigned | Unassigned | 1491_0 | Clustered           | 2 VC_1491_0  | 2   | 1      | 1          | 1      | 0 | 0 | 0 | 1      | ME  |
| SI-wms-combined_41369   | Unassigned | Unassigned | Unassigned | 1209_0 | Clustered           | 3 VC_1209_0  | 3   | 0.1553 | 0.99152019 | 0.154  | 0 | 0 | 0 | 1      | ME  |
| SI-wms-combined_52643   | Unassigned | Unassigned | Unassigned | 679_0  | Clustered           | 4 VC_679_0   | 4   | 0.2754 | 0.9999774  | 0.2754 | 0 | 0 | 0 | 1      | ME  |
| SI-wms-combined_68998   | Unassigned | Unassigned | Unassigned | 711_0  | Clustered           | 3 VC_711_0   | 3   | 0.2312 | 0.99842495 | 0.2309 | 0 | 0 | 0 | 1      | ME  |
| SI-wms-combined_72167   | Unassigned | Unassigned | Unassigned | 420_0  | Clustered           | 6 VC_420_0   | 6   | 0.2282 | 0.97462081 | 0.2224 | 0 | 0 | 0 | 1      | ME  |
| SI-wms-combined_85225   | Unassigned | Unassigned | Unassigned | 798_1  | Clustered/Singleton | 1 VC_798_1   | 1   | 0      | 1          | 0      | 0 | 0 | 0 | 1      | ME  |
| SI-wms_100010           | Unassigned | Unassigned | Unassigned | 1492_0 | Clustered           | 7 VC_1492_0  | 7   | 0.7322 | 1          | 0.7322 | 0 | 0 | 0 | 0.8571 | ME  |
| SI-wms_102342           | Unassigned | Unassigned | Unassigned | 719_0  | Clustered/Singleton | 1 VC_719_0   | 1   | 0      | 1          | 0      | 0 | 0 | 0 | 1      | ME  |
| SI-wms_130214           | Unassigned | Unassigned | Unassigned | 1209_0 | Clustered           | 3 VC_1209_0  | 3   | 0.1553 | 0.99152019 | 0.154  | 0 | 0 | 0 | 1      | ME  |
| SI-wms_170115           | Unassigned | Unassigned | Unassigned | 627_0  | Clustered           | 3 VC_627_0   | 3   | 0.2127 | 0.99411368 | 0.2115 | 0 | 0 | 0 | 1      | ME  |
| SI-wms_185046           | Unassigned | Unassigned | Unassigned | 1239_0 | Clustered           | 6 VC_1239_0  | 6   | 0.4699 | 0.99999972 | 0.4699 | 0 | 0 | 0 | 1      | ME  |
| SI-wms_212940           | Unassigned | Unassigned | Unassigned | 804_2  | Clustered           | 6 VC_804_2   | 6   | 0.1161 | 1          | 0.1161 | 0 | 0 | 0 | 0.8667 | ME  |
| SI-wms_225995           | Unassigned | Unassigned | Unassigned | 1492_0 | Clustered           | 7 VC_1492_0  | 7   | 0.7322 | 1          | 0.7322 | 0 | 0 | 0 | 0.8571 | ME  |
| SI-wms_244836           | Unassigned | Unassigned | Unassigned | 1473_0 | Clustered           | 3 VC_1473_0  | 3   | 0.7237 | 0.99613166 | 0.7209 | 0 | 0 | 0 | 0.6667 | ME  |
| SI-wms_296850           | Unassigned | Unassigned | Unassigned | 710_0  | Clustered           | 10 VC_710_0  | 10  | 0.2446 | 1          | 0.2446 | 0 | 0 | 0 | 0.8222 | ME  |
| SI-wms_313991           | Unassigned | Unassigned | Unassigned | 1496_0 | Clustered           | 5 VC_1496_0  | 5   | 0.9228 | 0.98875286 | 0.9124 | 0 | 0 | 0 | 1      | ME  |
| SI-wms_4277             | Unassigned | Unassigned | Unassigned | 1235_0 | Clustered           | 12 VC_1235_0 | 12  | 0.7997 | 1          | 0.7997 | 0 | 0 | 0 | 1      | ME  |
| SI1-wms-combined_119215 | Unassigned | Unassigned | Unassigned | 650_0  | Clustered           | 10 VC_650_0  | 10  | 0.4538 | 1          | 0.4538 | 0 | 0 | 0 | 1      | ME  |
| SI1-wms-combined_125176 | Unassigned | Unassigned | Unassigned | 1456_0 | Clustered           | 4 VC_1456_0  | 4   | 0.6121 | 0.99987744 | 0.612  | 0 | 0 | 0 | 1      | ME  |
| SI1-wms-combined_140009 | Unassigned | Unassigned | Unassigned | 621_0  | Clustered           | 7 VC_621_0   | 7   | 0.5783 | 1          | 0.5783 | 0 | 0 | 0 | 1      | ME  |
| SI1-wms-combined_154845 | Unassigned | Unassigned | Unassigned | 5_0    | Clustered           | 30 VC_5_0    | 30  | 0.9647 | 1          | 0.9647 | 0 | 0 | 0 | 1      | ME  |
| SI1-wms-combined_17029  | Unassigned | Unassigned | Unassigned | 1502_0 | Clustered           | 2 VC_1502_0  | 2   | 0.3993 | 0.91813282 | 0.3666 | 0 | 0 | 0 | 1      | ME  |
| SI1-wms-combined_172889 | Unassigned | Unassigned | Unassigned | 679_0  | Clustered           | 4 VC_679_0   | 4   | 0.2754 | 0.9999774  | 0.2754 | 0 | 0 | 0 | 1      | ME  |
| SI1-wms-combined_193148 | Unassigned | Unassigned | Unassigned | 616_0  | Clustered           | 2 VC_616_0   | 2   | 0.7322 | 0.81445332 | 0.5964 | 0 | 0 | 0 | 1      | ME  |
| SI1-wms-combined_194205 | Unassigned | Unassigned | Unassigned | 626_0  | Clustered           | 23 VC_626_0  | 23  | 0.66   | 1          | 0.66   | 0 | 0 | 0 | 0.8379 | ME  |
| SI1-wms-combined_195425 | Unassigned | Unassigned | Unassigned | 677_0  | Clustered           | 9 VC_677_0   | 9   | 0.3787 | 1          | 0.3787 | 0 | 0 | 0 | 0.8333 | ME  |
| SI1-wms-combined_198512 | Unassigned | Unassigned | Unassigned | 715_0  | Clustered           | 3 VC_715_0   | 3   | 0.2991 | 0.99813417 | 0.2985 | 0 | 0 | 0 | 1      | ME  |
| SI1-wms-combined_200084 | Unassigned | Unassigned | Unassigned | 825_0  | Clustered           | 7 VC_825_0   | 7   | 0.5674 | 1          | 0.5674 | 0 | 0 | 0 | 0.8571 | ME  |
| SI1-wms-combined_204522 | Unassigned | Unassigned | Unassigned | 616_0  | Clustered           | 2 VC_616_0   | 2   | 0.7322 | 0.81445332 | 0.5964 | 0 | 0 | 0 | 1      | ME  |
| SI1-wms-combined_217790 | Unassigned | Unassigned | Unassigned | 1503_0 | Clustered           | 3 VC_1503_0  | 3   | 0.9111 | 0.99054823 | 0.9025 | 0 | 0 | 0 | 1      | ME  |
| SI1-wms-combined_221310 | Unassigned | Unassigned | Unassigned | 1504_0 | Clustered           | 2 VC_1504_0  | 2   | 0.9646 | 0.5        | 0.4823 | 0 | 0 | 0 | 1      | ME  |
| SI1-wms-combined_264050 | Unassigned | Unassigned | Unassigned | 707_3  | Clustered/Singleton | 1 VC_707_3   | 1   | 0      | 1          | 0      | 0 | 0 | 0 | 1      | ME  |
| SI1-wms-combined_267993 | Unassigned | Unassigned | Unassigned | 825_1  | Clustered/Singleton | 1 VC_825_1   | 1   | 0      | 1          | 0      | 0 | 0 | 0 | 1      | ME  |
| SI1-wms-combined_268967 | Unassigned | Unassigned | Unassigned | 181_0  | Clustered           | 5 VC_181_0   | 5   | 0.1168 | 0.99999995 | 0.1168 | 0 | 0 | 0 | 1      | ME  |
| SI1-wms-combined_283220 | Unassigned | Unassigned | Unassigned | 1235_0 | Clustered           | 12 VC_1235_0 | 12  | 0.7997 | 1          | 0.7997 | 0 | 0 | 0 | 1      | ME  |
| SI1-wms-combined_299954 | Unassigned | Unassigned | Unassigned | 650_0  | Clustered           | 10 VC_650_0  | 10  | 0.4538 | 1          | 0.4538 | 0 | 0 | 0 | 1      | ME  |



|                         |            |            |            |        |                     |              |     |        |            |        |   |   |   |        |      |
|-------------------------|------------|------------|------------|--------|---------------------|--------------|-----|--------|------------|--------|---|---|---|--------|------|
| S11-wms-combined_304239 | Unassigned | Unassigned | Unassigned | 707_0  | Clustered           | 6 VC_707_0   | 6   | 0.2616 | 1          | 0.2616 | 0 | 0 | 0 | 0.8667 | ME   |
| S11-wms-combined_3507   | Unassigned | Unassigned | Unassigned | 1209_2 | Clustered/Singleton | 1 VC_1209_2  | 1   | 0      | 1          | 0      | 0 | 0 | 0 | 1      | ME   |
| S11-wms-combined_41367  | Unassigned | Unassigned | Unassigned | 1505_0 | Clustered           | 4 VC_1505_0  | 4   | 0.9495 | 0.99879268 | 0.9484 | 0 | 0 | 0 | 1      | ME   |
| S11-wms-combined_46816  | Unassigned | Unassigned | Unassigned | 893_0  | Clustered           | 2 VC_893_0   | 2   | 0.1729 | 0.93846104 | 0.1623 | 0 | 0 | 0 | 1      | ME   |
| S11-wms-combined_48246  | Unassigned | Unassigned | Unassigned | 917_0  | Clustered           | 2 VC_917_0   | 2   | 0.3004 | 0.94854123 | 0.2849 | 0 | 0 | 0 | 1      | ME   |
| S11-wms-combined_49632  | Unassigned | Unassigned | Unassigned | 650_0  | Clustered           | 10 VC_650_0  | 10  | 0.4538 | 1          | 0.4538 | 0 | 0 | 0 | 1      | ME   |
| S11-wms-combined_58538  | Unassigned | Unassigned | Unassigned | 271_0  | Clustered           | 5 VC_271_0   | 5   | 0.3916 | 0.99999838 | 0.3916 | 0 | 0 | 0 | 0.8    | ME   |
| S11-wms-combined_73204  | Unassigned | Unassigned | Unassigned | 1397_0 | Clustered           | 2 VC_1397_0  | 2   | 0.6905 | 0.93463371 | 0.6454 | 0 | 0 | 0 | 1      | ME   |
| S11-wms-combined_74983  | Unassigned | Unassigned | Unassigned | 710_0  | Clustered           | 10 VC_710_0  | 10  | 0.2446 | 1          | 0.2446 | 0 | 0 | 0 | 0.8222 | ME   |
| S11-wms-combined_83571  | Unassigned | Unassigned | Unassigned | 676_1  | Clustered           | 4 VC_676_1   | 4   | 0.3759 | 0.9999693  | 0.3759 | 0 | 0 | 0 | 0.6667 | ME   |
| S11-wms-combined_84326  | Unassigned | Unassigned | Unassigned | 716_0  | Clustered           | 2 VC_716_0   | 2   | 0.1025 | 0.95462977 | 0.0978 | 0 | 0 | 0 | 1      | ME   |
| S11-wms-combined_92114  | Unassigned | Unassigned | Unassigned | 1014_0 | Clustered           | 3 VC_1014_0  | 3   | 0.2026 | 0.85591218 | 0.1734 | 0 | 0 | 0 | 0.6667 | ME   |
| S11-wms_14390           | Unassigned | Unassigned | Unassigned | 271_0  | Clustered           | 5 VC_271_0   | 5   | 0.3916 | 0.99999838 | 0.3916 | 0 | 0 | 0 | 0.8    | ME   |
| S11-wms_303398          | Unassigned | Unassigned | Unassigned | 1239_0 | Clustered           | 6 VC_1239_0  | 6   | 0.4699 | 0.99999972 | 0.4699 | 0 | 0 | 0 | 1      | ME   |
| S11-wms_3116            | Unassigned | Unassigned | Unassigned | 1235_0 | Clustered           | 12 VC_1235_0 | 12  | 0.7997 | 1          | 0.7997 | 0 | 0 | 0 | 1      | ME   |
| S11-wms_320555          | Unassigned | Unassigned | Unassigned | 918_0  | Clustered           | 2 VC_918_0   | 2   | 0.1414 | 0.92876662 | 0.1314 | 0 | 0 | 0 | 1      | ME   |
| S11-wms_330479          | Unassigned | Unassigned | Unassigned | 1010_0 | Clustered           | 2 VC_1010_0  | 2   | 0.2036 | 0.77337265 | 0.1574 | 0 | 0 | 0 | 1      | ME   |
| S11-wms_55610           | Unassigned | Unassigned | Unassigned | 606_0  | Clustered           | 4 VC_606_0   | 4   | 0.4507 | 0.99995146 | 0.4507 | 0 | 0 | 0 | 1      | ME   |
| S12-wms-combined_107942 | Unassigned | Unassigned | Unassigned | 804_2  | Clustered           | 6 VC_804_2   | 6   | 0.1161 | 1          | 0.1161 | 0 | 0 | 0 | 0.8667 | SHHC |
| S12-wms-combined_111524 | Unassigned | Unassigned | Unassigned | 1503_0 | Clustered           | 3 VC_1503_0  | 3   | 0.9111 | 0.99054823 | 0.9025 | 0 | 0 | 0 | 1      | SHHC |
| S12-wms-combined_120133 | Unassigned | Unassigned | Unassigned | 338_0  | Clustered           | 5 VC_338_0   | 5   | 0.3309 | 0.99999987 | 0.3309 | 0 | 0 | 0 | 1      | SHHC |
| S12-wms-combined_129554 | Unassigned | Unassigned | Unassigned | 707_1  | Clustered           | 9 VC_707_1   | 9   | 0.2702 | 1          | 0.2702 | 0 | 0 | 0 | 0.8889 | SHHC |
| S12-wms-combined_129799 | Unassigned | Unassigned | Unassigned | 707_2  | Clustered/Singleton | 1 VC_707_2   | 1   | 0      | 1          | 0      | 0 | 0 | 0 | 1      | SHHC |
| S12-wms-combined_147628 | Unassigned | Unassigned | Unassigned | 1238_0 | Clustered           | 2 VC_1238_0  | 2   | 0.1055 | 0.91454824 | 0.0965 | 0 | 0 | 0 | 1      | SHHC |
| S12-wms-combined_156234 | Unassigned | Unassigned | Unassigned | 710_0  | Clustered           | 10 VC_710_0  | 10  | 0.2446 | 1          | 0.2446 | 0 | 0 | 0 | 0.8222 | SHHC |
| S12-wms-combined_157167 | Unassigned | Unassigned | Unassigned | 1489_0 | Clustered/Singleton | 1 VC_1489_0  | 1   | 0      | 1          | 0      | 0 | 0 | 0 | 1      | SHHC |
| S12-wms-combined_168259 | Unassigned | Unassigned | Unassigned | 736_0  | Clustered           | 3 VC_736_0   | 3   | 0.5056 | 0.95195384 | 0.4813 | 0 | 0 | 0 | 1      | SHHC |
| S12-wms-combined_17617  | Unassigned | Unassigned | Unassigned | 707_0  | Clustered           | 6 VC_707_0   | 6   | 0.2616 | 1          | 0.2616 | 0 | 0 | 0 | 0.8667 | SHHC |
| S12-wms-combined_18287  | Unassigned | Unassigned | Unassigned | 707_0  | Clustered           | 6 VC_707_0   | 6   | 0.2616 | 1          | 0.2616 | 0 | 0 | 0 | 0.8667 | SHHC |
| S12-wms-combined_191570 | Unassigned | Unassigned | Unassigned | 732_0  | Clustered           | 2 VC_732_0   | 2   | 0.0524 | 0.90742814 | 0.0476 | 0 | 0 | 0 | 1      | SHHC |
| S12-wms-combined_201125 | Unassigned | Unassigned | Unassigned | 918_2  | Clustered/Singleton | 1 VC_918_2   | 1   | 0      | 1          | 0      | 0 | 0 | 0 | 1      | SHHC |
| S12-wms-combined_210942 | Unassigned | Unassigned | Unassigned | 1487_0 | Clustered           | 2 VC_1487_0  | 2   | 1      | 1          | 1      | 0 | 0 | 0 | 1      | SHHC |
| S12-wms-combined_23517  | Unassigned | Unassigned | Unassigned | 1209_1 | Clustered/Singleton | 1 VC_1209_1  | 1   | 0      | 1          | 0      | 0 | 0 | 0 | 1      | SHHC |
| S12-wms-combined_2450   | Unassigned | Unassigned | Unassigned | 676_0  | Clustered           | 2 VC_676_0   | 2   | 0.1026 | 0.95156715 | 0.0977 | 0 | 0 | 0 | 1      | SHHC |
| S12-wms-combined_245755 | Unassigned | Unassigned | Unassigned | 876_0  | Clustered           | 3 VC_876_0   | 3   | 0.1628 | 0.99746631 | 0.1624 | 0 | 0 | 0 | 0.6667 | SHHC |
| S12-wms-combined_250551 | Unassigned | Unassigned | Unassigned | 677_0  | Clustered           | 9 VC_677_0   | 9   | 0.3787 | 1          | 0.3787 | 0 | 0 | 0 | 0.8333 | SHHC |
| S12-wms-combined_256209 | Unassigned | Unassigned | Unassigned | 1505_0 | Clustered           | 4 VC_1505_0  | 4   | 0.9495 | 0.99879268 | 0.9484 | 0 | 0 | 0 | 1      | SHHC |
| S12-wms-combined_259783 | Unassigned | Unassigned | Unassigned | 717_0  | Clustered           | 7 VC_717_0   | 7   | 0.5813 | 1          | 0.5813 | 0 | 0 | 0 | 0.9048 | SHHC |
| S12-wms-combined_260036 | Unassigned | Unassigned | Unassigned | 1439_0 | Clustered           | 3 VC_1439_0  | 3   | 0.4461 | 0.98736442 | 0.4405 | 0 | 0 | 0 | 1      | SHHC |
| S12-wms-combined_263377 | Unassigned | Unassigned | Unassigned | 212_0  | Clustered           | 2 VC_212_0   | 2   | 0.3005 | 0.9466884  | 0.2845 | 0 | 0 | 0 | 1      | SHHC |
| S12-wms-combined_264425 | Unassigned | Unassigned | Unassigned | 1492_0 | Clustered           | 7 VC_1492_0  | 7   | 0.7322 | 1          | 0.7322 | 0 | 0 | 0 | 0.8571 | SHHC |
| S12-wms-combined_264845 | Unassigned | Unassigned | Unassigned | 1507_0 | Clustered           | 2 VC_1507_0  | 2   | 0.543  | 0.72985431 | 0.3963 | 0 | 0 | 0 | 1      | SHHC |
| S12-wms-combined_282594 | Unassigned | Unassigned | Unassigned | 736_0  | Clustered           | 3 VC_736_0   | 3   | 0.5056 | 0.95195384 | 0.4813 | 0 | 0 | 0 | 1      | SHHC |
| S12-wms-combined_299293 | Unassigned | Unassigned | Unassigned | 1492_0 | Clustered           | 7 VC_1492_0  | 7   | 0.7322 | 1          | 0.7322 | 0 | 0 | 0 | 0.8571 | SHHC |
| S12-wms-combined_299872 | Unassigned | Unassigned | Unassigned | 1235_0 | Clustered           | 12 VC_1235_0 | 12  | 0.7997 | 1          | 0.7997 | 0 | 0 | 0 | 1      | SHHC |
| S12-wms-combined_320727 | Unassigned | Unassigned | Unassigned | 1397_0 | Clustered           | 2 VC_1397_0  | 2   | 0.6905 | 0.93463371 | 0.6454 | 0 | 0 | 0 | 1      | SHHC |
| S12-wms-combined_321174 | Unassigned | Unassigned | Unassigned | 915_0  | Clustered           | 3 VC_915_0   | 3   | 0.2219 | 0.99819349 | 0.2215 | 0 | 0 | 0 | 1      | SHHC |
| S12-wms-combined_323943 | Unassigned | Unassigned | Unassigned | 711_1  | Clustered/Singleton | 1 VC_711_1   | 1   | 0      | 1          | 0      | 0 | 0 | 0 | 1      | SHHC |
| S12-wms-combined_329242 | Unassigned | Unassigned | Unassigned | 1484_0 | Clustered           | 10 VC_1484_0 | 10  | 0.6918 | 0.99999998 | 0.6918 | 0 | 0 | 0 | 0.8889 | SHHC |
| S12-wms-combined_334806 | Unassigned | Unassigned | Unassigned | 1239_0 | Clustered           | 6 VC_1239_0  | 6   | 0.4699 | 0.99999972 | 0.4699 | 0 | 0 | 0 | 1      | SHHC |
| S12-wms-combined_345948 | Unassigned | Unassigned | Unassigned | 621_0  | Clustered           | 7 VC_621_0   | 7   | 0.5783 | 1          | 0.5783 | 0 | 0 | 0 | 1      | SHHC |
| S12-wms-combined_351847 | Unassigned | Unassigned | Unassigned | 1436_0 | Clustered           | 4 VC_1436_0  | 4   | 0.571  | 0.96369953 | 0.5502 | 0 | 0 | 0 | 1      | SHHC |
| S12-wms-combined_358010 | Unassigned | Unassigned | Unassigned | 715_0  | Clustered           | 3 VC_715_0   | 3   | 0.2991 | 0.99813417 | 0.2985 | 0 | 0 | 0 | 1      | SHHC |
| S12-wms-combined_358797 | Unassigned | Unassigned | Unassigned | 678_0  | Clustered/Singleton | 1 VC_678_0   | 1   | 0      | 1          | 0      | 0 | 0 | 0 | 1      | SHHC |
| S12-wms-combined_368462 | Unassigned | Unassigned | Unassigned | 626_0  | Clustered           | 23 VC_626_0  | 23  | 0.66   | 1          | 0.66   | 0 | 0 | 0 | 0.8379 | SHHC |
| S12-wms-combined_375343 | Unassigned | Unassigned | Unassigned | 1502_0 | Clustered           | 2 VC_1502_0  | 2   | 0.3993 | 0.91813282 | 0.3666 | 0 | 0 | 0 | 1      | SHHC |
| S12-wms-combined_376326 | Unassigned | Unassigned | Unassigned | 1076_0 | Clustered           | 2 VC_1076_0  | 2   | 0.3461 | 0.6381632  | 0.2209 | 0 | 0 | 0 | 1      | SHHC |
| S12-wms-combined_393703 | Unassigned | Unassigned | Unassigned | 1481_0 | Clustered           | 9 VC_1481_0  | 9   | 0.9416 | 0.77917309 | 0.7337 | 0 | 0 | 0 | 1      | SHHC |
| S12-wms-combined_401379 | Unassigned | Unassigned | Unassigned | 1500_0 | Clustered           | 2 VC_1500_0  | 2   | 0.9749 | 0.5        | 0.4875 | 0 | 0 | 0 | 1      | SHHC |
| S12-wms-combined_401383 | Unassigned | Unassigned | Unassigned | 1510_0 | Clustered           | 2 VC_1510_0  | 2   | 1      | 1          | 1      | 0 | 0 | 0 | 1      | SHHC |
| S12-wms-combined_41160  | Unassigned | Unassigned | Unassigned | 1238_0 | Clustered           | 2 VC_1238_0  | 2   | 0.1055 | 0.91454824 | 0.0965 | 0 | 0 | 0 | 1      | SHHC |
| S12-wms-combined_51076  | Unassigned | Unassigned | Unassigned | 1479_0 | Clustered           | 2 VC_1479_0  | 2   | 0.4887 | 0.93846104 | 0.4586 | 0 | 0 | 0 | 1      | SHHC |
| S12-wms-combined_71235  | Unassigned | Unassigned | Unassigned | 621_0  | Clustered           | 7 VC_621_0   | 7   | 0.5783 | 1          | 0.5783 | 0 | 0 | 0 | 1      | SHHC |
| S12-wms-combined_7174   | Unassigned | Unassigned | Unassigned | 626_0  | Clustered           | 23 VC_626_0  | 23  | 0.66   | 1          | 0.66   | 0 | 0 | 0 | 0.8379 | SHHC |
| S12-wms-combined_91231  | Unassigned | Unassigned | Unassigned | 1439_0 | Clustered           | 3 VC_1439_0  | 3   | 0.4461 | 0.98736442 | 0.4405 | 0 | 0 | 0 | 1      | SHHC |
| S12-wms-combined_98046  | Unassigned | Unassigned | Unassigned | 626_2  | Clustered/Singleton | 1 VC_626_2   | 1   | 0      | 1          | 0      | 0 | 0 | 0 | 1      | SHHC |
| S12-wms-combined_99704  | Unassigned | Unassigned | Unassigned | 626_0  | Clustered           | 23 VC_626_0  | 23  | 0.66   | 1          | 0.66   | 0 | 0 | 0 | 0.8379 | SHHC |
| S12-wms_12658           | Unassigned | Unassigned | Unassigned | 918_0  | Clustered           | 2 VC_918_0   | 2   | 0.1414 | 0.92876662 | 0.1314 | 0 | 0 | 0 | 1      | SHHC |
| S12-wms_15700           | Unassigned | Unassigned | Unassigned | 1511_0 | Clustered           | 2 VC_1511_0  | 2   | 1      | 1          | 1      | 0 | 0 | 0 | 1      | SHHC |
| S12-wms_179388          | Unassigned | Unassigned | Unassigned | 1492_0 | Clustered           | 7 VC_1492_0  | 7   | 0.7322 | 1          | 0.7322 | 0 | 0 | 0 | 0.8571 | SHHC |
| S12-wms_193565          | Unassigned | Unassigned | Unassigned | 1235_0 | Clustered           | 12 VC_1235_0 | 12  | 0.7997 | 1          | 0.7997 | 0 | 0 | 0 | 1      | SHHC |
| S12-wms_373775          | Unassigned | Unassigned | Unassigned | 1507_0 | Clustered           | 2 VC_1507_0  | 2   | 0.543  | 0.72985431 | 0.3963 | 0 | 0 | 0 | 1      | SHHC |
| S12-wms_383851          | Unassigned | Unassigned | Unassigned | 1436_0 | Clustered           | 4 VC_1436_0  | 4   | 0.571  | 0.96369953 | 0.5502 | 0 | 0 | 0 | 1      | SHHC |
| S12-wms_386692          | Unassigned | Unassigned | Unassigned | 1456_0 | Clustered           | 4 VC_1456_0  | 4   | 0.6121 | 0.99987744 | 0.612  | 0 | 0 | 0 | 1      | SHHC |
| S12-wms_401366          | Unassigned | Unassigned | Unassigned | 1492_0 | Clustered           | 7 VC_1492_0  | 7   | 0.7322 | 1          | 0.7322 | 0 | 0 | 0 | 0.8571 | SHHC |
| S12-wms_401372          | Unassigned | Unassigned | Unassigned | 1420_0 | Clustered           | 5 VC_1420_0  | 5   | 1      | 1          | 1      | 0 | 0 | 0 | 1      | SHHC |
| S12-wms_44817           | Unassigned | Unassigned | Unassigned | 1492_0 | Clustered           | 7 VC_1492_0  | 7   | 0.7322 | 1          | 0.7322 | 0 | 0 | 0 | 0.8571 | SHHC |
| S13CG                   | Unassigned | Unassigned | Unassigned | 303_0  | Clustered           | 155 VC_303_0 | 155 | 0.9979 | 1          | 0.9979 | 0 | 0 | 0 | 1      | Ref  |
| S17-wms-combined_126600 | Unassigned | Unassigned | Unassigned | 1481_0 | Clustered           | 9 VC_1481_0  | 9   | 0.9416 | 0.77917309 | 0.7337 | 0 | 0 | 0 | 1      | ME   |
| S17-wms-combined_126774 | Unassigned | Unassigned | Unassigned | 1484_0 | Clustered           | 10 VC_1484_0 | 10  | 0.6918 | 0.99999998 | 0.6918 | 0 | 0 | 0 | 0.8889 | ME   |
| S17-wms-combined_127688 | Unassigned | Unassigned | Unassigned | 707_1  | Clustered           | 9 VC_707_1   | 9   | 0.2702 | 1          | 0.2702 | 0 | 0 | 0 | 0.8889 | ME   |



|                         |            |            |            |        |                     |              |    |        |             |        |   |   |   |             |
|-------------------------|------------|------------|------------|--------|---------------------|--------------|----|--------|-------------|--------|---|---|---|-------------|
| S17-wms-combined_130215 | Unassigned | Unassigned | Unassigned | 338_0  | Clustered           | 5 VC_338_0   | 5  | 0.3309 | 0.999999987 | 0.3309 | 0 | 0 | 0 | 1 ME        |
| S17-wms-combined_136622 | Unassigned | Unassigned | Unassigned | 650_0  | Clustered           | 10 VC_650_0  | 10 | 0.4538 | 1           | 0.4538 | 0 | 0 | 0 | 1 ME        |
| S17-wms-combined_146850 | Unassigned | Unassigned | Unassigned | 1484_0 | Clustered           | 10 VC_1484_0 | 10 | 0.6918 | 0.999999998 | 0.6918 | 0 | 0 | 0 | 0.8889 ME   |
| S17-wms-combined_157468 | Unassigned | Unassigned | Unassigned | 1484_0 | Clustered           | 10 VC_1484_0 | 10 | 0.6918 | 0.999999998 | 0.6918 | 0 | 0 | 0 | 0.8889 ME   |
| S17-wms-combined_158354 | Unassigned | Unassigned | Unassigned | 1505_0 | Clustered           | 4 VC_1505_0  | 4  | 0.9495 | 0.99879268  | 0.9484 | 0 | 0 | 0 | 1 ME        |
| S17-wms-combined_162786 | Unassigned | Unassigned | Unassigned | 1408_0 | Clustered           | 2 VC_1408_0  | 2  | 0.1695 | 0.59870633  | 0.1015 | 0 | 0 | 0 | 1 ME        |
| S17-wms-combined_16309  | Unassigned | Unassigned | Unassigned | 1435_0 | Clustered           | 9 VC_1435_0  | 9  | 0.6931 | 0.999999995 | 0.6931 | 0 | 0 | 0 | 1 ME        |
| S17-wms-combined_175924 | Unassigned | Unassigned | Unassigned | 1235_0 | Clustered           | 12 VC_1235_0 | 12 | 0.7997 | 1           | 0.7997 | 0 | 0 | 0 | 1 ME        |
| S17-wms-combined_179771 | Unassigned | Unassigned | Unassigned | 1509_0 | Clustered           | 2 VC_1509_0  | 2  | 0.5962 | 0.91237788  | 0.5439 | 0 | 0 | 0 | 1 ME        |
| S17-wms-combined_186314 | Unassigned | Unassigned | Unassigned | 798_2  | Clustered/Singleton | 1 VC_798_2   | 1  | 0      | 1           | 0      | 0 | 0 | 0 | 1 ME        |
| S17-wms-combined_193958 | Unassigned | Unassigned | Unassigned | 1235_0 | Clustered           | 12 VC_1235_0 | 12 | 0.7997 | 1           | 0.7997 | 0 | 0 | 0 | 1 ME        |
| S17-wms-combined_199440 | Unassigned | Unassigned | Unassigned | 707_0  | Clustered           | 6 VC_707_0   | 6  | 0.2616 | 1           | 0.2616 | 0 | 0 | 0 | 0.8667 ME   |
| S17-wms-combined_199746 | Unassigned | Unassigned | Unassigned | 1014_0 | Clustered           | 3 VC_1014_0  | 3  | 0.2026 | 0.85591218  | 0.1734 | 0 | 0 | 0 | 0.6667 ME   |
| S17-wms-combined_203701 | Unassigned | Unassigned | Unassigned | 1508_0 | Clustered           | 3 VC_1508_0  | 3  | 0.8977 | 0.9595722   | 0.8614 | 0 | 0 | 0 | 0.6667 ME   |
| S17-wms-combined_2234   | Unassigned | Unassigned | Unassigned | 711_2  | Clustered/Singleton | 1 VC_711_2   | 1  | 0      | 1           | 0      | 0 | 0 | 0 | 1 ME        |
| S17-wms-combined_223748 | Unassigned | Unassigned | Unassigned | 1512_0 | Clustered           | 2 VC_1512_0  | 2  | 1      | 1           | 1      | 0 | 0 | 0 | 1 ME        |
| S17-wms-combined_225356 | Unassigned | Unassigned | Unassigned | 1513_0 | Clustered           | 2 VC_1513_0  | 2  | 0.9263 | 0.5         | 0.4632 | 0 | 0 | 0 | 1 ME        |
| S17-wms-combined_233761 | Unassigned | Unassigned | Unassigned | 1495_0 | Clustered           | 3 VC_1495_0  | 3  | 0.7112 | 0.99363432  | 0.7067 | 0 | 0 | 0 | 1 ME        |
| S17-wms-combined_247494 | Unassigned | Unassigned | Unassigned | 650_0  | Clustered           | 10 VC_650_0  | 10 | 0.4538 | 1           | 0.4538 | 0 | 0 | 0 | 1 ME        |
| S17-wms-combined_248321 | Unassigned | Unassigned | Unassigned | 717_1  | Clustered/Singleton | 1 VC_717_1   | 1  | 0      | 1           | 0      | 0 | 0 | 0 | 1 ME        |
| S17-wms-combined_259811 | Unassigned | Unassigned | Unassigned | 804_1  | Clustered           | 2 VC_804_1   | 2  | 0.0413 | 0.95352218  | 0.0394 | 0 | 0 | 0 | 1 ME        |
| S17-wms-combined_260343 | Unassigned | Unassigned | Unassigned | 710_0  | Clustered           | 10 VC_710_0  | 10 | 0.2446 | 1           | 0.2446 | 0 | 0 | 0 | 0.8222 ME   |
| S17-wms-combined_30308  | Unassigned | Unassigned | Unassigned | 1482_0 | Clustered           | 2 VC_1482_0  | 2  | 0.3552 | 0.85557782  | 0.3039 | 0 | 0 | 0 | 1 ME        |
| S17-wms-combined_47860  | Unassigned | Unassigned | Unassigned | 804_1  | Clustered           | 2 VC_804_1   | 2  | 0.0413 | 0.95352218  | 0.0394 | 0 | 0 | 0 | 1 ME        |
| S17-wms-combined_70983  | Unassigned | Unassigned | Unassigned | 1494_0 | Clustered           | 2 VC_1494_0  | 2  | 0.9538 | 0.5         | 0.4769 | 0 | 0 | 0 | 1 ME        |
| S17-wms-combined_79709  | Unassigned | Unassigned | Unassigned | 650_0  | Clustered           | 10 VC_650_0  | 10 | 0.4538 | 1           | 0.4538 | 0 | 0 | 0 | 1 ME        |
| S17-wms-combined_90378  | Unassigned | Unassigned | Unassigned | 621_0  | Clustered           | 7 VC_621_0   | 7  | 0.5783 | 1           | 0.5783 | 0 | 0 | 0 | 1 ME        |
| S17-wms-combined_95360  | Unassigned | Unassigned | Unassigned | 732_1  | Clustered/Singleton | 1 VC_732_1   | 1  | 0      | 1           | 0      | 0 | 0 | 0 | 1 ME        |
| S17-wms-combined_9864   | Unassigned | Unassigned | Unassigned | 626_0  | Clustered           | 23 VC_626_0  | 23 | 0.66   | 1           | 0.66   | 0 | 0 | 0 | 0.8379 ME   |
| S17-wms_124308          | Unassigned | Unassigned | Unassigned | 1435_0 | Clustered           | 9 VC_1435_0  | 9  | 0.6931 | 0.999999995 | 0.6931 | 0 | 0 | 0 | 1 ME        |
| S17-wms_254872          | Unassigned | Unassigned | Unassigned | 1276_0 | Clustered           | 7 VC_1276_0  | 7  | 0.8695 | 0.99982476  | 0.8693 | 0 | 0 | 0 | 1 ME        |
| S17-wms_266511          | Unassigned | Unassigned | Unassigned | 540_0  | Clustered           | 15 VC_540_0  | 15 | 0.2866 | 1           | 0.2866 | 0 | 0 | 0 | 1 ME        |
| S2-wms-combined_101826  | Unassigned | Unassigned | Unassigned | 734_0  | Clustered           | 6 VC_734_0   | 6  | 0.1914 | 0.99996888  | 0.1914 | 0 | 0 | 0 | 1 SHHC      |
| S2-wms-combined_113619  | Unassigned | Unassigned | Unassigned | 832_0  | Clustered           | 2 VC_832_0   | 2  | 0.2344 | 0.94526139  | 0.2215 | 0 | 0 | 0 | 1 SHHC      |
| S2-wms-combined_116221  | Unassigned | Unassigned | Unassigned | 876_1  | Clustered/Singleton | 1 VC_876_1   | 1  | 0      | 1           | 0      | 0 | 0 | 0 | 1 SHHC      |
| S2-wms-combined_126134  | Unassigned | Unassigned | Unassigned | 650_0  | Clustered           | 10 VC_650_0  | 10 | 0.4538 | 1           | 0.4538 | 0 | 0 | 0 | 1 SHHC      |
| S2-wms-combined_13246   | Unassigned | Unassigned | Unassigned | 710_4  | Clustered/Singleton | 1 VC_710_4   | 1  | 0      | 1           | 0      | 0 | 0 | 0 | 1 SHHC      |
| S2-wms-combined_132966  | Unassigned | Unassigned | Unassigned | 1422_0 | Clustered           | 2 VC_1422_0  | 2  | 1      | 1           | 1      | 0 | 0 | 0 | 1 SHHC      |
| S2-wms-combined_135139  | Unassigned | Unassigned | Unassigned | 738_0  | Clustered           | 2 VC_738_0   | 2  | 0.6709 | 0.85557782  | 0.574  | 0 | 0 | 0 | 1 SHHC      |
| S2-wms-combined_135154  | Unassigned | Unassigned | Unassigned | 947_0  | Clustered           | 3 VC_947_0   | 3  | 0.0374 | 0.84591675  | 0.0316 | 0 | 0 | 0 | 1 SHHC      |
| S2-wms-combined_137119  | Unassigned | Unassigned | Unassigned | 710_1  | Clustered/Singleton | 1 VC_710_1   | 1  | 0      | 1           | 0      | 0 | 0 | 0 | 1 SHHC      |
| S2-wms-combined_140996  | Unassigned | Unassigned | Unassigned | 711_3  | Clustered/Singleton | 1 VC_711_3   | 1  | 0      | 1           | 0      | 0 | 0 | 0 | 1 SHHC      |
| S2-wms-combined_157934  | Unassigned | Unassigned | Unassigned | 1235_1 | Clustered/Singleton | 1 VC_1235_1  | 1  | 0      | 1           | 0      | 0 | 0 | 0 | 1 SHHC      |
| S2-wms-combined_165833  | Unassigned | Unassigned | Unassigned | 1235_0 | Clustered           | 12 VC_1235_0 | 12 | 0.7997 | 1           | 0.7997 | 0 | 0 | 0 | 1 SHHC      |
| S2-wms-combined_166665  | Unassigned | Unassigned | Unassigned | 324_0  | Clustered           | 2 VC_324_0   | 2  | 0.2055 | 0.95514459  | 0.1963 | 0 | 0 | 0 | 1 SHHC      |
| S2-wms-combined_174241  | Unassigned | Unassigned | Unassigned | 626_0  | Clustered           | 23 VC_626_0  | 23 | 0.66   | 1           | 0.66   | 0 | 0 | 0 | 0.8379 SHHC |
| S2-wms-combined_176376  | Unassigned | Unassigned | Unassigned | 825_0  | Clustered           | 7 VC_825_0   | 7  | 0.5674 | 1           | 0.5674 | 0 | 0 | 0 | 0.8571 SHHC |
| S2-wms-combined_180640  | Unassigned | Unassigned | Unassigned | 707_1  | Clustered           | 9 VC_707_1   | 9  | 0.2702 | 1           | 0.2702 | 0 | 0 | 0 | 0.8889 SHHC |
| S2-wms-combined_181095  | Unassigned | Unassigned | Unassigned | 1481_0 | Clustered           | 9 VC_1481_0  | 9  | 0.9416 | 0.77917309  | 0.7337 | 0 | 0 | 0 | 1 SHHC      |
| S2-wms-combined_196783  | Unassigned | Unassigned | Unassigned | 629_0  | Clustered           | 2 VC_629_0   | 2  | 0.0041 | 0.93549515  | 0.0038 | 0 | 0 | 0 | 1 SHHC      |
| S2-wms-combined_197577  | Unassigned | Unassigned | Unassigned | 1420_0 | Clustered           | 5 VC_1420_0  | 5  | 1      | 1           | 1      | 0 | 0 | 0 | 1 SHHC      |
| S2-wms-combined_207832  | Unassigned | Unassigned | Unassigned | 717_0  | Clustered           | 7 VC_717_0   | 7  | 0.5813 | 1           | 0.5813 | 0 | 0 | 0 | 0.9048 SHHC |
| S2-wms-combined_210822  | Unassigned | Unassigned | Unassigned | 1495_0 | Clustered           | 3 VC_1495_0  | 3  | 0.7112 | 0.99363432  | 0.7067 | 0 | 0 | 0 | 1 SHHC      |
| S2-wms-combined_218002  | Unassigned | Unassigned | Unassigned | 148_1  | Clustered           | 3 VC_148_1   | 3  | 0.4008 | 0.99752212  | 0.3998 | 0 | 0 | 0 | 1 SHHC      |
| S2-wms-combined_227800  | Unassigned | Unassigned | Unassigned | 420_0  | Clustered           | 6 VC_420_0   | 6  | 0.2282 | 0.97462081  | 0.2224 | 0 | 0 | 0 | 1 SHHC      |
| S2-wms-combined_229529  | Unassigned | Unassigned | Unassigned | 1473_0 | Clustered           | 3 VC_1473_0  | 3  | 0.7237 | 0.99613166  | 0.7209 | 0 | 0 | 0 | 0.6667 SHHC |
| S2-wms-combined_233107  | Unassigned | Unassigned | Unassigned | 1485_0 | Clustered/Singleton | 1 VC_1485_0  | 1  | 0      | 1           | 0      | 0 | 0 | 0 | 1 SHHC      |
| S2-wms-combined_238929  | Unassigned | Unassigned | Unassigned | 732_0  | Clustered           | 2 VC_732_0   | 2  | 0.0524 | 0.90742814  | 0.0476 | 0 | 0 | 0 | 1 SHHC      |
| S2-wms-combined_244564  | Unassigned | Unassigned | Unassigned | 626_0  | Clustered           | 23 VC_626_0  | 23 | 0.66   | 1           | 0.66   | 0 | 0 | 0 | 0.8379 SHHC |
| S2-wms-combined_24549   | Unassigned | Unassigned | Unassigned | 651_0  | Clustered/Singleton | 1 VC_651_0   | 1  | 0      | 1           | 0      | 0 | 0 | 0 | 1 SHHC      |
| S2-wms-combined_246480  | Unassigned | Unassigned | Unassigned | 418_0  | Clustered           | 6 VC_418_0   | 6  | 0.4575 | 0.99999995  | 0.4575 | 0 | 0 | 0 | 0.8 SHHC    |
| S2-wms-combined_248318  | Unassigned | Unassigned | Unassigned | 1498_0 | Clustered           | 2 VC_1498_0  | 2  | 0.9131 | 0.5         | 0.4566 | 0 | 0 | 0 | 1 SHHC      |
| S2-wms-combined_248329  | Unassigned | Unassigned | Unassigned | 734_0  | Clustered           | 6 VC_734_0   | 6  | 0.1914 | 0.99996888  | 0.1914 | 0 | 0 | 0 | 1 SHHC      |
| S2-wms-combined_31084   | Unassigned | Unassigned | Unassigned | 212_1  | Clustered           | 2 VC_212_1   | 2  | 0.164  | 0.95199974  | 0.1561 | 0 | 0 | 0 | 1 SHHC      |
| S2-wms-combined_4685    | Unassigned | Unassigned | Unassigned | 1484_0 | Clustered           | 10 VC_1484_0 | 10 | 0.6918 | 0.999999998 | 0.6918 | 0 | 0 | 0 | 0.8889 SHHC |
| S2-wms-combined_55495   | Unassigned | Unassigned | Unassigned | 338_0  | Clustered           | 5 VC_338_0   | 5  | 0.3309 | 0.999999987 | 0.3309 | 0 | 0 | 0 | 1 SHHC      |
| S2-wms-combined_58121   | Unassigned | Unassigned | Unassigned | 1436_0 | Clustered           | 4 VC_1436_0  | 4  | 0.571  | 0.96369953  | 0.5502 | 0 | 0 | 0 | 1 SHHC      |
| S2-wms-combined_62377   | Unassigned | Unassigned | Unassigned | 804_2  | Clustered           | 6 VC_804_2   | 6  | 0.1161 | 1           | 0.1161 | 0 | 0 | 0 | 0.8667 SHHC |
| S2-wms-combined_62519   | Unassigned | Unassigned | Unassigned | 148_0  | Clustered           | 2 VC_148_0   | 2  | 0.2043 | 0.95366539  | 0.1949 | 0 | 0 | 0 | 1 SHHC      |
| S2-wms-combined_6605    | Unassigned | Unassigned | Unassigned | 1484_0 | Clustered           | 10 VC_1484_0 | 10 | 0.6918 | 0.999999998 | 0.6918 | 0 | 0 | 0 | 0.8889 SHHC |
| S2-wms-combined_85381   | Unassigned | Unassigned | Unassigned | 707_1  | Clustered           | 9 VC_707_1   | 9  | 0.2702 | 1           | 0.2702 | 0 | 0 | 0 | 0.8889 SHHC |
| S2-wms-combined_89742   | Unassigned | Unassigned | Unassigned | 610_0  | Clustered           | 4 VC_610_0   | 4  | 0.8779 | 0.9998533   | 0.8778 | 0 | 0 | 0 | 1 SHHC      |
| S2-wms-combined_93845   | Unassigned | Unassigned | Unassigned | 271_0  | Clustered           | 5 VC_271_0   | 5  | 0.3916 | 0.99999838  | 0.3916 | 0 | 0 | 0 | 0.8 SHHC    |
| S2-wms-combined_98888   | Unassigned | Unassigned | Unassigned | 804_3  | Clustered/Singleton | 1 VC_804_3   | 1  | 0      | 1           | 0      | 0 | 0 | 0 | 1 SHHC      |
| S2-wms_107329           | Unassigned | Unassigned | Unassigned | 606_0  | Clustered           | 4 VC_606_0   | 4  | 0.4507 | 0.99995146  | 0.4507 | 0 | 0 | 0 | 1 SHHC      |
| S2-wms_110761           | Unassigned | Unassigned | Unassigned | 1496_0 | Clustered           | 5 VC_1496_0  | 5  | 0.9228 | 0.98875286  | 0.9124 | 0 | 0 | 0 | 1 SHHC      |
| S2-wms_128831           | Unassigned | Unassigned | Unassigned | 1420_0 | Clustered           | 5 VC_1420_0  | 5  | 1      | 1           | 1      | 0 | 0 | 0 | 1 SHHC      |
| S2-wms_128962           | Unassigned | Unassigned | Unassigned | 502_0  | Clustered           | 2 VC_502_0   | 2  | 0.0737 | 0.95171362  | 0.0702 | 0 | 0 | 0 | 1 SHHC      |
| S2-wms_130687           | Unassigned | Unassigned | Unassigned | 417_0  | Clustered           | 5 VC_417_0   | 5  | 0.6629 | 0.9977434   | 0.6614 | 0 | 0 | 0 | 0.8 SHHC    |
| S2-wms_140933           | Unassigned | Unassigned | Unassigned | 418_0  | Clustered           | 6 VC_418_0   | 6  | 0.4575 | 0.99999995  | 0.4575 | 0 | 0 | 0 | 0.8 SHHC    |
| S2-wms_156439           | Unassigned | Unassigned | Unassigned | 1435_0 | Clustered           | 9 VC_1435_0  | 9  | 0.6931 | 0.99999995  | 0.6931 | 0 | 0 | 0 | 1 SHHC      |



|                          |            |            |            |        |                     |              |    |        |            |        |   |   |   |             |
|--------------------------|------------|------------|------------|--------|---------------------|--------------|----|--------|------------|--------|---|---|---|-------------|
| S2-wms_23562             | Unassigned | Unassigned | Unassigned | 1496_0 | Clustered           | 5 VC_1496_0  | 5  | 0.9228 | 0.98875286 | 0.9124 | 0 | 0 | 0 | 1 SHHC      |
| S2-wms_248315            | Unassigned | Unassigned | Unassigned | 804_2  | Clustered           | 6 VC_804_2   | 6  | 0.1161 | 1          | 0.1161 | 0 | 0 | 0 | 0.8667 SHHC |
| S2-wms_53881             | Unassigned | Unassigned | Unassigned | 821_0  | Clustered           | 4 VC_821_0   | 4  | 0.0504 | 0.65965187 | 0.0333 | 0 | 0 | 0 | 1 SHHC      |
| S2-wms_79304             | Unassigned | Unassigned | Unassigned | 744_0  | Clustered           | 10 VC_744_0  | 10 | 0.7049 | 1          | 0.7049 | 0 | 0 | 0 | 1 SHHC      |
| S2-wms_79944             | Unassigned | Unassigned | Unassigned | 825_0  | Clustered           | 7 VC_825_0   | 7  | 0.5674 | 1          | 0.5674 | 0 | 0 | 0 | 0.8571 SHHC |
| S3-wms-combined_73262    | Unassigned | Unassigned | Unassigned | 677_0  | Clustered           | 9 VC_677_0   | 9  | 0.3787 | 1          | 0.3787 | 0 | 0 | 0 | 0.8333 ME   |
| S3-wms_22744             | Unassigned | Unassigned | Unassigned | 717_0  | Clustered           | 7 VC_717_0   | 7  | 0.5813 | 1          | 0.5813 | 0 | 0 | 0 | 0.9048 ME   |
| S3-wms_23958             | Unassigned | Unassigned | Unassigned | 915_0  | Clustered           | 3 VC_915_0   | 3  | 0.2219 | 0.99819349 | 0.2215 | 0 | 0 | 0 | 1 ME        |
| S4-wms-combined_113721   | Unassigned | Unassigned | Unassigned | 893_0  | Clustered           | 2 VC_893_0   | 2  | 0.1729 | 0.93846104 | 0.1623 | 0 | 0 | 0 | 1 SHHC      |
| S4-wms-combined_143879   | Unassigned | Unassigned | Unassigned | 1482_0 | Clustered           | 2 VC_1482_0  | 2  | 0.3552 | 0.85557782 | 0.3039 | 0 | 0 | 0 | 1 SHHC      |
| S4-wms-combined_14411    | Unassigned | Unassigned | Unassigned | 831_0  | Clustered           | 5 VC_831_0   | 5  | 0.4369 | 0.99999952 | 0.4369 | 0 | 0 | 0 | 1 SHHC      |
| S4-wms-combined_17284    | Unassigned | Unassigned | Unassigned | 852_0  | Clustered           | 2 VC_852_0   | 2  | 0.4064 | 0.94189878 | 0.3828 | 0 | 0 | 0 | 1 SHHC      |
| S4-wms-combined_41490    | Unassigned | Unassigned | Unassigned | 610_0  | Clustered           | 4 VC_610_0   | 4  | 0.8779 | 0.9998533  | 0.8778 | 0 | 0 | 0 | 1 SHHC      |
| S4-wms-combined_42647    | Unassigned | Unassigned | Unassigned | 621_0  | Clustered           | 7 VC_621_0   | 7  | 0.5783 | 1          | 0.5783 | 0 | 0 | 0 | 1 SHHC      |
| S4-wms-combined_47565    | Unassigned | Unassigned | Unassigned | 1495_0 | Clustered           | 3 VC_1495_0  | 3  | 0.7112 | 0.99363432 | 0.7067 | 0 | 0 | 0 | 1 SHHC      |
| S4-wms-combined_51079    | Unassigned | Unassigned | Unassigned | 1497_0 | Clustered           | 3 VC_1497_0  | 3  | 1      | 1          | 1      | 0 | 0 | 0 | 1 SHHC      |
| S4-wms-combined_57123    | Unassigned | Unassigned | Unassigned | 1508_0 | Clustered           | 3 VC_1508_0  | 3  | 0.8977 | 0.9595722  | 0.8614 | 0 | 0 | 0 | 0.6667 SHHC |
| S4-wms-combined_64632    | Unassigned | Unassigned | Unassigned | 418_0  | Clustered           | 6 VC_418_0   | 6  | 0.4575 | 0.9999995  | 0.4575 | 0 | 0 | 0 | 0.8 SHHC    |
| S4-wms_107182            | Unassigned | Unassigned | Unassigned | 1513_0 | Clustered           | 2 VC_1513_0  | 2  | 0.9263 | 0.5        | 0.4632 | 0 | 0 | 0 | 1 SHHC      |
| S4-wms_118690            | Unassigned | Unassigned | Unassigned | 535_0  | Clustered           | 2 VC_535_0   | 2  | 0.1332 | 0.94063346 | 0.1253 | 0 | 0 | 0 | 1 SHHC      |
| S4-wms_141607            | Unassigned | Unassigned | Unassigned | 1008_0 | Clustered           | 4 VC_1008_0  | 4  | 0.6602 | 0.99993542 | 0.6601 | 0 | 0 | 0 | 1 SHHC      |
| S4-wms_161443            | Unassigned | Unassigned | Unassigned | 1477_0 | Clustered           | 3 VC_1477_0  | 3  | 1      | 1          | 1      | 0 | 0 | 0 | 1 SHHC      |
| S4-wms_45128             | Unassigned | Unassigned | Unassigned | 1439_0 | Clustered           | 3 VC_1439_0  | 3  | 0.4461 | 0.98736442 | 0.4405 | 0 | 0 | 0 | 1 SHHC      |
| S4-wms_62635             | Unassigned | Unassigned | Unassigned | 418_0  | Clustered           | 6 VC_418_0   | 6  | 0.4575 | 0.9999995  | 0.4575 | 0 | 0 | 0 | 0.8 SHHC    |
| S4-wms_73990             | Unassigned | Unassigned | Unassigned | 502_1  | Clustered           | 6 VC_502_1   | 6  | 0.234  | 1          | 0.234  | 0 | 0 | 0 | 1 SHHC      |
| S5-wms-combined_108794   | Unassigned | Unassigned | Unassigned | 626_3  | Clustered/Singleton | 1 VC_626_3   | 1  | 0      | 1          | 0      | 0 | 0 | 0 | 1 ME        |
| S5-wms-combined_117213   | Unassigned | Unassigned | Unassigned | 854_0  | Clustered           | 2 VC_854_0   | 2  | 0.4056 | 0.9446828  | 0.3831 | 0 | 0 | 0 | 1 ME        |
| S5-wms-combined_134381   | Unassigned | Unassigned | Unassigned | 717_0  | Clustered           | 7 VC_717_0   | 7  | 0.5813 | 1          | 0.5813 | 0 | 0 | 0 | 0.9048 ME   |
| S5-wms-combined_134743   | Unassigned | Unassigned | Unassigned | 825_2  | Clustered/Singleton | 1 VC_825_2   | 1  | 0      | 1          | 0      | 0 | 0 | 0 | 1 ME        |
| S5-wms-combined_145067   | Unassigned | Unassigned | Unassigned | 650_0  | Clustered           | 10 VC_650_0  | 10 | 0.4538 | 1          | 0.4538 | 0 | 0 | 0 | 1 ME        |
| S5-wms-combined_178432   | Unassigned | Unassigned | Unassigned | 1506_0 | Clustered           | 2 VC_1506_0  | 2  | 0.2109 | 0.80863346 | 0.1706 | 0 | 0 | 0 | 1 ME        |
| S5-wms-combined_18356    | Unassigned | Unassigned | Unassigned | 5_0    | Clustered           | 30 VC_5_0    | 30 | 0.9647 | 1          | 0.9647 | 0 | 0 | 0 | 1 ME        |
| S5-wms-combined_206050   | Unassigned | Unassigned | Unassigned | 626_0  | Clustered           | 23 VC_626_0  | 23 | 0.66   | 1          | 0.66   | 0 | 0 | 0 | 0.8379 ME   |
| S5-wms-combined_207291   | Unassigned | Unassigned | Unassigned | 1437_0 | Clustered           | 3 VC_1437_0  | 3  | 0.742  | 0.99188498 | 0.7359 | 0 | 0 | 0 | 1 ME        |
| S5-wms-combined_26971    | Unassigned | Unassigned | Unassigned | 876_0  | Clustered           | 3 VC_876_0   | 3  | 0.1628 | 0.99746631 | 0.1624 | 0 | 0 | 0 | 0.6667 ME   |
| S5-wms-combined_29272    | Unassigned | Unassigned | Unassigned | 626_0  | Clustered           | 23 VC_626_0  | 23 | 0.66   | 1          | 0.66   | 0 | 0 | 0 | 0.8379 ME   |
| S5-wms-combined_29447    | Unassigned | Unassigned | Unassigned | 676_0  | Clustered           | 2 VC_676_0   | 2  | 0.1026 | 0.95156715 | 0.0977 | 0 | 0 | 0 | 1 ME        |
| S5-wms-combined_39793    | Unassigned | Unassigned | Unassigned | 1514_0 | Clustered           | 2 VC_1514_0  | 2  | 1      | 1          | 1      | 0 | 0 | 0 | 1 ME        |
| S5-wms-combined_52741    | Unassigned | Unassigned | Unassigned | 736_0  | Clustered           | 3 VC_736_0   | 3  | 0.5056 | 0.95195384 | 0.4813 | 0 | 0 | 0 | 1 ME        |
| S5-wms-combined_59064    | Unassigned | Unassigned | Unassigned | 677_0  | Clustered           | 9 VC_677_0   | 9  | 0.3787 | 1          | 0.3787 | 0 | 0 | 0 | 0.8333 ME   |
| S5-wms-combined_66017    | Unassigned | Unassigned | Unassigned | 1499_0 | Clustered           | 2 VC_1499_0  | 2  | 0.3148 | 0.5        | 0.1574 | 0 | 0 | 0 | 1 ME        |
| S5-wms-combined_66662    | Unassigned | Unassigned | Unassigned | 1219_1 | Clustered/Singleton | 1 VC_1219_1  | 1  | 0      | 1          | 0      | 0 | 0 | 0 | 1 ME        |
| S5-wms-combined_72410    | Unassigned | Unassigned | Unassigned | 804_4  | Clustered/Singleton | 1 VC_804_4   | 1  | 0      | 1          | 0      | 0 | 0 | 0 | 1 ME        |
| S5-wms-combined_7292     | Unassigned | Unassigned | Unassigned | 734_0  | Clustered           | 6 VC_734_0   | 6  | 0.1914 | 0.99996888 | 0.1914 | 0 | 0 | 0 | 1 ME        |
| S5-wms-combined_73301    | Unassigned | Unassigned | Unassigned | 627_0  | Clustered           | 3 VC_627_0   | 3  | 0.2127 | 0.99411368 | 0.2115 | 0 | 0 | 0 | 1 ME        |
| S5-wms-combined_78434    | Unassigned | Unassigned | Unassigned | 1479_0 | Clustered           | 2 VC_1479_0  | 2  | 0.4887 | 0.93846104 | 0.4586 | 0 | 0 | 0 | 1 ME        |
| S5-wms-combined_83370    | Unassigned | Unassigned | Unassigned | 680_0  | Clustered           | 2 VC_680_0   | 2  | 0.1163 | 0.94939599 | 0.1104 | 0 | 0 | 0 | 1 ME        |
| S5-wms-combined_83412    | Unassigned | Unassigned | Unassigned | 19_0   | Clustered           | 2 VC_19_0    | 2  | 0.0418 | 0.92044806 | 0.0385 | 0 | 0 | 0 | 1 ME        |
| S5-wms-combined_90315    | Unassigned | Unassigned | Unassigned | 917_1  | Clustered/Singleton | 1 VC_917_1   | 1  | 0      | 1          | 0      | 0 | 0 | 0 | 1 ME        |
| S5-wms-combined_98202    | Unassigned | Unassigned | Unassigned | 1503_0 | Clustered           | 3 VC_1503_0  | 3  | 0.9111 | 0.99054823 | 0.9025 | 0 | 0 | 0 | 1 ME        |
| S5-wms_210460            | Unassigned | Unassigned | Unassigned | 1499_0 | Clustered           | 2 VC_1499_0  | 2  | 0.3148 | 0.5        | 0.1574 | 0 | 0 | 0 | 1 ME        |
| S5-wms_49310             | Unassigned | Unassigned | Unassigned | 417_0  | Clustered           | 5 VC_417_0   | 5  | 0.6629 | 0.9977434  | 0.6614 | 0 | 0 | 0 | 0.8 ME      |
| S5-wms_52566             | Unassigned | Unassigned | Unassigned | 1481_0 | Clustered           | 9 VC_1481_0  | 9  | 0.9416 | 0.77917309 | 0.7337 | 0 | 0 | 0 | 1 ME        |
| S5-wms_67169             | Unassigned | Unassigned | Unassigned | 914_0  | Clustered/Singleton | 1 VC_914_0   | 1  | 0      | 1          | 0      | 0 | 0 | 0 | 1 ME        |
| S5-wms_85650             | Unassigned | Unassigned | Unassigned | 1505_0 | Clustered           | 4 VC_1505_0  | 4  | 0.9495 | 0.99879268 | 0.9484 | 0 | 0 | 0 | 1 ME        |
| S5-wms_94965             | Unassigned | Unassigned | Unassigned | 1198_0 | Clustered           | 3 VC_1198_0  | 3  | 0.2794 | 0.95148141 | 0.2658 | 0 | 0 | 0 | 1 ME        |
| S6-wms-combined_113986   | Unassigned | Unassigned | Unassigned | 627_0  | Clustered           | 3 VC_627_0   | 3  | 0.2127 | 0.99411368 | 0.2115 | 0 | 0 | 0 | 1 SHHC      |
| S6-wms-combined_117756   | Unassigned | Unassigned | Unassigned | 707_1  | Clustered           | 9 VC_707_1   | 9  | 0.2702 | 1          | 0.2702 | 0 | 0 | 0 | 0.8889 SHHC |
| S6-wms-combined_118427   | Unassigned | Unassigned | Unassigned | 710_3  | Clustered/Singleton | 1 VC_710_3   | 1  | 0      | 1          | 0      | 0 | 0 | 0 | 1 SHHC      |
| S6-wms-combined_118484   | Unassigned | Unassigned | Unassigned | 338_0  | Clustered           | 5 VC_338_0   | 5  | 0.3309 | 0.99999987 | 0.3309 | 0 | 0 | 0 | 1 SHHC      |
| S6-wms-combined_119017   | Unassigned | Unassigned | Unassigned | 5_0    | Clustered           | 30 VC_5_0    | 30 | 0.9647 | 1          | 0.9647 | 0 | 0 | 0 | 1 SHHC      |
| S6-wms-combined_119138   | Unassigned | Unassigned | Unassigned | 148_1  | Clustered           | 3 VC_148_1   | 3  | 0.4008 | 0.99752212 | 0.3998 | 0 | 0 | 0 | 1 SHHC      |
| S6-wms-combined_126236   | Unassigned | Unassigned | Unassigned | 710_0  | Clustered           | 10 VC_710_0  | 10 | 0.2446 | 1          | 0.2446 | 0 | 0 | 0 | 0.8222 SHHC |
| S6-wms-combined_135223   | Unassigned | Unassigned | Unassigned | 1508_0 | Clustered           | 3 VC_1508_0  | 3  | 0.8977 | 0.9595722  | 0.8614 | 0 | 0 | 0 | 0.6667 SHHC |
| S6-wms-combined_140731   | Unassigned | Unassigned | Unassigned | 825_0  | Clustered           | 7 VC_825_0   | 7  | 0.5674 | 1          | 0.5674 | 0 | 0 | 0 | 0.8571 SHHC |
| S6-wms-combined_32530    | Unassigned | Unassigned | Unassigned | 148_1  | Clustered           | 3 VC_148_1   | 3  | 0.4008 | 0.99752212 | 0.3998 | 0 | 0 | 0 | 1 SHHC      |
| S6-wms-combined_41246    | Unassigned | Unassigned | Unassigned | 1484_0 | Clustered           | 10 VC_1484_0 | 10 | 0.6918 | 0.99999998 | 0.6918 | 0 | 0 | 0 | 0.8889 SHHC |
| S6-wms-combined_49909    | Unassigned | Unassigned | Unassigned | 324_0  | Clustered           | 2 VC_324_0   | 2  | 0.2055 | 0.95514459 | 0.1963 | 0 | 0 | 0 | 1 SHHC      |
| S6-wms-combined_50721    | Unassigned | Unassigned | Unassigned | 676_1  | Clustered           | 4 VC_676_1   | 4  | 0.3759 | 0.9999693  | 0.3759 | 0 | 0 | 0 | 0.6667 SHHC |
| S6-wms-combined_72228    | Unassigned | Unassigned | Unassigned | 1506_0 | Clustered           | 2 VC_1506_0  | 2  | 0.2109 | 0.80863346 | 0.1706 | 0 | 0 | 0 | 1 SHHC      |
| S6-wms-combined_82597    | Unassigned | Unassigned | Unassigned | 1435_1 | Clustered/Singleton | 1 VC_1435_1  | 1  | 0      | 1          | 0      | 0 | 0 | 0 | 1 SHHC      |
| S6-wms-combined_8508     | Unassigned | Unassigned | Unassigned | 707_0  | Clustered           | 6 VC_707_0   | 6  | 0.2616 | 1          | 0.2616 | 0 | 0 | 0 | 0.8667 SHHC |
| S6-wms-combined_91039    | Unassigned | Unassigned | Unassigned | 1456_0 | Clustered           | 4 VC_1456_0  | 4  | 0.6121 | 0.99987744 | 0.612  | 0 | 0 | 0 | 1 SHHC      |
| S6-wms_132588            | Unassigned | Unassigned | Unassigned | 212_0  | Clustered           | 2 VC_212_0   | 2  | 0.3005 | 0.9466884  | 0.2845 | 0 | 0 | 0 | 1 SHHC      |
| S6-wms_137591            | Unassigned | Unassigned | Unassigned | 1496_0 | Clustered           | 5 VC_1496_0  | 5  | 0.9228 | 0.98875286 | 0.9124 | 0 | 0 | 0 | 1 SHHC      |
| S6-wms_138342            | Unassigned | Unassigned | Unassigned | 502_0  | Clustered           | 2 VC_502_0   | 2  | 0.0737 | 0.95171362 | 0.0702 | 0 | 0 | 0 | 1 SHHC      |
| S6-wms_54578             | Unassigned | Unassigned | Unassigned | 831_0  | Clustered           | 5 VC_831_0   | 5  | 0.4369 | 0.99999952 | 0.4369 | 0 | 0 | 0 | 1 SHHC      |
| S7-wms-combined_104872   | Unassigned | Unassigned | Unassigned | 1437_0 | Clustered           | 3 VC_1437_0  | 3  | 0.742  | 0.99188498 | 0.7359 | 0 | 0 | 0 | 1 ME        |
| S7-wms-combined_107679_0 | Unassigned | Unassigned | Unassigned | 676_1  | Clustered           | 4 VC_676_1   | 4  | 0.3759 | 0.9999693  | 0.3759 | 0 | 0 | 0 | 0.6667 ME   |
| S7-wms-combined_111004   | Unassigned | Unassigned | Unassigned | 711_0  | Clustered           | 3 VC_711_0   | 3  | 0.2312 | 0.99842495 | 0.2309 | 0 | 0 | 0 | 1 ME        |
| S7-wms-combined_134458   | Unassigned | Unassigned | Unassigned | 710_0  | Clustered           | 10 VC_710_0  | 10 | 0.2446 | 1          | 0.2446 | 0 | 0 | 0 | 0.8222 ME   |



|                        |            |            |            |        |                     |              |    |        |            |        |   |   |   |             |
|------------------------|------------|------------|------------|--------|---------------------|--------------|----|--------|------------|--------|---|---|---|-------------|
| S7-wms-combined_136642 | Unassigned | Unassigned | Unassigned | 1497_0 | Clustered           | 3 VC_1497_0  | 3  | 1      | 1          | 1      | 0 | 0 | 0 | 1 ME        |
| S7-wms-combined_139683 | Unassigned | Unassigned | Unassigned | 876_0  | Clustered           | 3 VC_876_0   | 3  | 0.1628 | 0.99746631 | 0.1624 | 0 | 0 | 0 | 0.6667 ME   |
| S7-wms-combined_14267  | Unassigned | Unassigned | Unassigned | 1456_0 | Clustered           | 4 VC_1456_0  | 4  | 0.6121 | 0.99987744 | 0.612  | 0 | 0 | 0 | 1 ME        |
| S7-wms-combined_143218 | Unassigned | Unassigned | Unassigned | 1514_0 | Clustered           | 2 VC_1514_0  | 2  | 1      | 1          | 1      | 0 | 0 | 0 | 1 ME        |
| S7-wms-combined_147158 | Unassigned | Unassigned | Unassigned | 798_0  | Clustered           | 2 VC_798_0   | 2  | 0.1818 | 0.94346013 | 0.1715 | 0 | 0 | 0 | 1 ME        |
| S7-wms-combined_157260 | Unassigned | Unassigned | Unassigned | 710_2  | Clustered/Singleton | 1 VC_710_2   | 1  | 0      | 1          | 0      | 0 | 0 | 0 | 1 ME        |
| S7-wms-combined_163980 | Unassigned | Unassigned | Unassigned | 1014_0 | Clustered           | 3 VC_1014_0  | 3  | 0.2026 | 0.85591218 | 0.1734 | 0 | 0 | 0 | 0.6667 ME   |
| S7-wms-combined_169375 | Unassigned | Unassigned | Unassigned | 1483_0 | Clustered/Singleton | 1 VC_1483_0  | 1  | 0      | 1          | 0      | 0 | 0 | 0 | 1 ME        |
| S7-wms-combined_163916 | Unassigned | Unassigned | Unassigned | 1435_0 | Clustered           | 9 VC_1435_0  | 9  | 0.6931 | 0.99999995 | 0.6931 | 0 | 0 | 0 | 1 ME        |
| S7-wms-combined_189250 | Unassigned | Unassigned | Unassigned | 1198_0 | Clustered           | 3 VC_1198_0  | 3  | 0.2794 | 0.95148141 | 0.2658 | 0 | 0 | 0 | 1 ME        |
| S7-wms-combined_20921  | Unassigned | Unassigned | Unassigned | 719_1  | Clustered/Singleton | 1 VC_719_1   | 1  | 0      | 1          | 0      | 0 | 0 | 0 | 1 ME        |
| S7-wms-combined_225260 | Unassigned | Unassigned | Unassigned | 822_0  | Clustered           | 2 VC_822_0   | 2  | 0.038  | 0.89489263 | 0.034  | 0 | 0 | 0 | 1 ME        |
| S7-wms-combined_235165 | Unassigned | Unassigned | Unassigned | 1109_0 | Clustered           | 2 VC_1109_0  | 2  | 0.6449 | 0.85557782 | 0.5517 | 0 | 0 | 0 | 1 ME        |
| S7-wms-combined_238231 | Unassigned | Unassigned | Unassigned | 271_2  | Clustered/Singleton | 1 VC_271_2   | 1  | 0      | 1          | 0      | 0 | 0 | 0 | 1 ME        |
| S7-wms-combined_239784 | Unassigned | Unassigned | Unassigned | 1436_0 | Clustered           | 4 VC_1436_0  | 4  | 0.571  | 0.96369953 | 0.5502 | 0 | 0 | 0 | 1 ME        |
| S7-wms-combined_26217  | Unassigned | Unassigned | Unassigned | 918_1  | Clustered/Singleton | 1 VC_918_1   | 1  | 0      | 1          | 0      | 0 | 0 | 0 | 1 ME        |
| S7-wms-combined_28138  | Unassigned | Unassigned | Unassigned | 420_0  | Clustered           | 6 VC_420_0   | 6  | 0.2282 | 0.97462081 | 0.2224 | 0 | 0 | 0 | 1 ME        |
| S7-wms-combined_31068  | Unassigned | Unassigned | Unassigned | 650_0  | Clustered           | 10 VC_650_0  | 10 | 0.4538 | 1          | 0.4538 | 0 | 0 | 0 | 1 ME        |
| S7-wms-combined_3697   | Unassigned | Unassigned | Unassigned | 832_1  | Clustered/Singleton | 1 VC_832_1   | 1  | 0      | 1          | 0      | 0 | 0 | 0 | 1 ME        |
| S7-wms-combined_40779  | Unassigned | Unassigned | Unassigned | 1239_0 | Clustered           | 6 VC_1239_0  | 6  | 0.4699 | 0.99999972 | 0.4699 | 0 | 0 | 0 | 1 ME        |
| S7-wms-combined_43950  | Unassigned | Unassigned | Unassigned | 677_0  | Clustered           | 9 VC_677_0   | 9  | 0.3787 | 1          | 0.3787 | 0 | 0 | 0 | 0.8333 ME   |
| S7-wms-combined_5625   | Unassigned | Unassigned | Unassigned | 677_0  | Clustered           | 9 VC_677_0   | 9  | 0.3787 | 1          | 0.3787 | 0 | 0 | 0 | 0.8333 ME   |
| S7-wms-combined_62119  | Unassigned | Unassigned | Unassigned | 1221_1 | Clustered/Singleton | 1 VC_1221_1  | 1  | 0      | 1          | 0      | 0 | 0 | 0 | 1 ME        |
| S7-wms-combined_7205   | Unassigned | Unassigned | Unassigned | 212_1  | Clustered           | 2 VC_212_1   | 2  | 0.164  | 0.95199974 | 0.1561 | 0 | 0 | 0 | 1 ME        |
| S7-wms-combined_72070  | Unassigned | Unassigned | Unassigned | 1509_0 | Clustered           | 2 VC_1509_0  | 2  | 0.5962 | 0.91237788 | 0.5439 | 0 | 0 | 0 | 1 ME        |
| S7-wms-combined_84688  | Unassigned | Unassigned | Unassigned | 1484_0 | Clustered           | 10 VC_1484_0 | 10 | 0.6918 | 0.99999998 | 0.6918 | 0 | 0 | 0 | 0.8889 ME   |
| S7-wms-combined_90393  | Unassigned | Unassigned | Unassigned | 1435_0 | Clustered           | 9 VC_1435_0  | 9  | 0.6931 | 0.99999995 | 0.6931 | 0 | 0 | 0 | 1 ME        |
| S7-wms-combined_90728  | Unassigned | Unassigned | Unassigned | 1435_0 | Clustered           | 9 VC_1435_0  | 9  | 0.6931 | 0.99999995 | 0.6931 | 0 | 0 | 0 | 1 ME        |
| S7-wms_113137          | Unassigned | Unassigned | Unassigned | 1235_0 | Clustered           | 12 VC_1235_0 | 12 | 0.7997 | 1          | 0.7997 | 0 | 0 | 0 | 1 ME        |
| S7-wms_118607          | Unassigned | Unassigned | Unassigned | 717_0  | Clustered           | 7 VC_717_0   | 7  | 0.5813 | 1          | 0.5813 | 0 | 0 | 0 | 0.9048 ME   |
| S7-wms_123954          | Unassigned | Unassigned | Unassigned | 1435_0 | Clustered           | 9 VC_1435_0  | 9  | 0.6931 | 0.99999995 | 0.6931 | 0 | 0 | 0 | 1 ME        |
| S7-wms_127801          | Unassigned | Unassigned | Unassigned | 420_0  | Clustered           | 6 VC_420_0   | 6  | 0.2282 | 0.97462081 | 0.2224 | 0 | 0 | 0 | 1 ME        |
| S7-wms_157264          | Unassigned | Unassigned | Unassigned | 1477_0 | Clustered           | 3 VC_1477_0  | 3  | 1      | 1          | 1      | 0 | 0 | 0 | 1 ME        |
| S7-wms_159432          | Unassigned | Unassigned | Unassigned | 707_1  | Clustered           | 9 VC_707_1   | 9  | 0.2702 | 1          | 0.2702 | 0 | 0 | 0 | 0.8889 ME   |
| S7-wms_200936          | Unassigned | Unassigned | Unassigned | 1235_0 | Clustered           | 12 VC_1235_0 | 12 | 0.7997 | 1          | 0.7997 | 0 | 0 | 0 | 1 ME        |
| S7-wms_239833          | Unassigned | Unassigned | Unassigned | 821_0  | Clustered           | 4 VC_821_0   | 4  | 0.0504 | 0.65965187 | 0.0333 | 0 | 0 | 0 | 1 ME        |
| S7-wms_244425          | Unassigned | Unassigned | Unassigned | 675_0  | Clustered           | 2 VC_675_0   | 2  | 0.081  | 0.95018582 | 0.077  | 0 | 0 | 0 | 1 ME        |
| S7-wms_244866          | Unassigned | Unassigned | Unassigned | 1009_0 | Clustered           | 3 VC_1009_0  | 3  | 0.127  | 0.99814461 | 0.1267 | 0 | 0 | 0 | 1 ME        |
| S7-wms_53338           | Unassigned | Unassigned | Unassigned | 821_0  | Clustered           | 4 VC_821_0   | 4  | 0.0504 | 0.65965187 | 0.0333 | 0 | 0 | 0 | 1 ME        |
| S7-wms_80255           | Unassigned | Unassigned | Unassigned | 629_0  | Clustered           | 2 VC_629_0   | 2  | 0.0041 | 0.93549515 | 0.0038 | 0 | 0 | 0 | 1 ME        |
| S8-wms-combined_108917 | Unassigned | Unassigned | Unassigned | 626_0  | Clustered           | 23 VC_626_0  | 23 | 0.66   | 1          | 0.66   | 0 | 0 | 0 | 0.8379 SHHC |
| S8-wms-combined_134098 | Unassigned | Unassigned | Unassigned | 1239_0 | Clustered           | 6 VC_1239_0  | 6  | 0.4699 | 0.99999972 | 0.4699 | 0 | 0 | 0 | 1 SHHC      |
| S8-wms-combined_134284 | Unassigned | Unassigned | Unassigned | 1236_0 | Clustered           | 3 VC_1236_0  | 3  | 0.1415 | 0.99774774 | 0.1412 | 0 | 0 | 0 | 1 SHHC      |
| S8-wms-combined_140059 | Unassigned | Unassigned | Unassigned | 420_0  | Clustered           | 6 VC_420_0   | 6  | 0.2282 | 0.97462081 | 0.2224 | 0 | 0 | 0 | 1 SHHC      |
| S8-wms-combined_146562 | Unassigned | Unassigned | Unassigned | 271_0  | Clustered           | 5 VC_271_0   | 5  | 0.3916 | 0.99999838 | 0.3916 | 0 | 0 | 0 | 0.8 SHHC    |
| S8-wms-combined_161181 | Unassigned | Unassigned | Unassigned | 148_0  | Clustered           | 2 VC_148_0   | 2  | 0.2043 | 0.95566539 | 0.1949 | 0 | 0 | 0 | 1 SHHC      |
| S8-wms-combined_169835 | Unassigned | Unassigned | Unassigned | 915_0  | Clustered           | 3 VC_915_0   | 3  | 0.2219 | 0.99819349 | 0.2215 | 0 | 0 | 0 | 1 SHHC      |
| S8-wms-combined_186054 | Unassigned | Unassigned | Unassigned | 626_0  | Clustered           | 23 VC_626_0  | 23 | 0.66   | 1          | 0.66   | 0 | 0 | 0 | 0.8379 SHHC |
| S8-wms-combined_200168 | Unassigned | Unassigned | Unassigned | 707_1  | Clustered           | 9 VC_707_1   | 9  | 0.2702 | 1          | 0.2702 | 0 | 0 | 0 | 0.8889 SHHC |
| S8-wms-combined_211119 | Unassigned | Unassigned | Unassigned | 1236_0 | Clustered           | 3 VC_1236_0  | 3  | 0.1415 | 0.99774774 | 0.1412 | 0 | 0 | 0 | 1 SHHC      |
| S8-wms-combined_215102 | Unassigned | Unassigned | Unassigned | 1504_0 | Clustered           | 2 VC_1504_0  | 2  | 0.9646 | 0.5        | 0.4823 | 0 | 0 | 0 | 1 SHHC      |
| S8-wms-combined_217866 | Unassigned | Unassigned | Unassigned | 707_1  | Clustered           | 9 VC_707_1   | 9  | 0.2702 | 1          | 0.2702 | 0 | 0 | 0 | 0.8889 SHHC |
| S8-wms-combined_225114 | Unassigned | Unassigned | Unassigned | 271_1  | Clustered/Singleton | 1 VC_271_1   | 1  | 0      | 1          | 0      | 0 | 0 | 0 | 1 SHHC      |
| S8-wms-combined_226076 | Unassigned | Unassigned | Unassigned | 1511_0 | Clustered           | 2 VC_1511_0  | 2  | 1      | 1          | 1      | 0 | 0 | 0 | 1 SHHC      |
| S8-wms-combined_234473 | Unassigned | Unassigned | Unassigned | 1481_0 | Clustered           | 9 VC_1481_0  | 9  | 0.9416 | 0.77917309 | 0.7337 | 0 | 0 | 0 | 1 SHHC      |
| S8-wms-combined_246185 | Unassigned | Unassigned | Unassigned | 738_0  | Clustered           | 2 VC_738_0   | 2  | 0.6709 | 0.85557782 | 0.574  | 0 | 0 | 0 | 1 SHHC      |
| S8-wms-combined_25607  | Unassigned | Unassigned | Unassigned | 1239_0 | Clustered           | 6 VC_1239_0  | 6  | 0.4699 | 0.99999972 | 0.4699 | 0 | 0 | 0 | 1 SHHC      |
| S8-wms-combined_26087  | Unassigned | Unassigned | Unassigned | 610_0  | Clustered           | 4 VC_610_0   | 4  | 0.8779 | 0.9998533  | 0.8778 | 0 | 0 | 0 | 1 SHHC      |
| S8-wms-combined_264711 | Unassigned | Unassigned | Unassigned | 1481_0 | Clustered           | 9 VC_1481_0  | 9  | 0.9416 | 0.77917309 | 0.7337 | 0 | 0 | 0 | 1 SHHC      |
| S8-wms-combined_270362 | Unassigned | Unassigned | Unassigned | 917_0  | Clustered           | 2 VC_917_0   | 2  | 0.3004 | 0.94854123 | 0.2849 | 0 | 0 | 0 | 1 SHHC      |
| S8-wms-combined_276204 | Unassigned | Unassigned | Unassigned | 1501_0 | Clustered           | 2 VC_1501_0  | 2  | 0.1152 | 0.71936208 | 0.0829 | 0 | 0 | 0 | 1 SHHC      |
| S8-wms-combined_276211 | Unassigned | Unassigned | Unassigned | 1209_0 | Clustered           | 3 VC_1209_0  | 3  | 0.1553 | 0.99152019 | 0.154  | 0 | 0 | 0 | 1 SHHC      |
| S8-wms-combined_40666  | Unassigned | Unassigned | Unassigned | 1483_1 | Clustered/Singleton | 1 VC_1483_1  | 1  | 0      | 1          | 0      | 0 | 0 | 0 | 1 SHHC      |
| S8-wms-combined_49369  | Unassigned | Unassigned | Unassigned | 1236_0 | Clustered           | 3 VC_1236_0  | 3  | 0.1415 | 0.99774774 | 0.1412 | 0 | 0 | 0 | 1 SHHC      |
| S8-wms-combined_68780  | Unassigned | Unassigned | Unassigned | 271_0  | Clustered           | 5 VC_271_0   | 5  | 0.3916 | 0.99999838 | 0.3916 | 0 | 0 | 0 | 0.8 SHHC    |
| S8-wms-combined_72911  | Unassigned | Unassigned | Unassigned | 1076_0 | Clustered           | 2 VC_1076_0  | 2  | 0.3461 | 0.6381632  | 0.2209 | 0 | 0 | 0 | 1 SHHC      |
| S8-wms-combined_97848  | Unassigned | Unassigned | Unassigned | 677_0  | Clustered           | 9 VC_677_0   | 9  | 0.3787 | 1          | 0.3787 | 0 | 0 | 0 | 0.8333 SHHC |
| S8-wms_111056          | Unassigned | Unassigned | Unassigned | 674_0  | Clustered/Singleton | 1 VC_674_0   | 1  | 0      | 1          | 0      | 0 | 0 | 0 | 1 SHHC      |
| S8-wms_127191          | Unassigned | Unassigned | Unassigned | 804_2  | Clustered           | 6 VC_804_2   | 6  | 0.1161 | 1          | 0.1161 | 0 | 0 | 0 | 0.8667 SHHC |
| S8-wms_152831          | Unassigned | Unassigned | Unassigned | 710_0  | Clustered           | 10 VC_710_0  | 10 | 0.2446 | 1          | 0.2446 | 0 | 0 | 0 | 0.8222 SHHC |
| S8-wms_244525          | Unassigned | Unassigned | Unassigned | 821_0  | Clustered           | 4 VC_821_0   | 4  | 0.0504 | 0.65965187 | 0.0333 | 0 | 0 | 0 | 1 SHHC      |
| S8-wms_30498           | Unassigned | Unassigned | Unassigned | 1235_0 | Clustered           | 12 VC_1235_0 | 12 | 0.7997 | 1          | 0.7997 | 0 | 0 | 0 | 1 SHHC      |
| S8-wms_48935           | Unassigned | Unassigned | Unassigned | 710_0  | Clustered           | 10 VC_710_0  | 10 | 0.2446 | 1          | 0.2446 | 0 | 0 | 0 | 0.8222 SHHC |
| S8-wms_57121           | Unassigned | Unassigned | Unassigned | 1501_0 | Clustered           | 2 VC_1501_0  | 2  | 0.1152 | 0.71936208 | 0.0829 | 0 | 0 | 0 | 1 SHHC      |
| S8-wms_82880           | Unassigned | Unassigned | Unassigned | 606_0  | Clustered           | 4 VC_606_0   | 4  | 0.4507 | 0.99995146 | 0.4507 | 0 | 0 | 0 | 1 SHHC      |
| S9-wms-combined_105462 | Unassigned | Unassigned | Unassigned | 825_0  | Clustered           | 7 VC_825_0   | 7  | 0.5674 | 1          | 0.5674 | 0 | 0 | 0 | 0.8571 ME   |
| S9-wms-combined_20485  | Unassigned | Unassigned | Unassigned | 255_1  | Clustered/Singleton | 1 VC_255_1   | 1  | 0      | 1          | 0      | 0 | 0 | 0 | 1 ME        |
| S9-wms-combined_25007  | Unassigned | Unassigned | Unassigned | 626_0  | Clustered           | 23 VC_626_0  | 23 | 0.66   | 1          | 0.66   | 0 | 0 | 0 | 0.8379 ME   |
| S9-wms-combined_26410  | Unassigned | Unassigned | Unassigned | 804_2  | Clustered           | 6 VC_804_2   | 6  | 0.1161 | 1          | 0.1161 | 0 | 0 | 0 | 0.8667 ME   |
| S9-wms-combined_28805  | Unassigned | Unassigned | Unassigned | 676_1  | Clustered           | 4 VC_676_1   | 4  | 0.3759 | 0.9999693  | 0.3759 | 0 | 0 | 0 | 0.6667 ME   |
| S9-wms-combined_29611  | Unassigned | Unassigned | Unassigned | 606_1  | Clustered/Singleton | 1 VC_606_1   | 1  | 0      | 1          | 0      | 0 | 0 | 0 | 1 ME        |



|                       |            |            |            |        |                         |     |           |     |        |             |        |   |   |   |        |     |
|-----------------------|------------|------------|------------|--------|-------------------------|-----|-----------|-----|--------|-------------|--------|---|---|---|--------|-----|
| S9-wms-combined_31456 | Unassigned | Unassigned | Unassigned | 677_0  | Clustered               | 9   | VC_677_0  | 9   | 0.3787 | 1           | 0.3787 | 0 | 0 | 0 | 0.8333 | ME  |
| S9-wms-combined_33229 | Unassigned | Unassigned | Unassigned | 1435_0 | Clustered               | 9   | VC_1435_0 | 9   | 0.6931 | 0.99999995  | 0.6931 | 0 | 0 | 0 | 1      | ME  |
| S9-wms-combined_33230 | Unassigned | Unassigned | Unassigned | 1435_0 | Clustered               | 9   | VC_1435_0 | 9   | 0.6931 | 0.99999995  | 0.6931 | 0 | 0 | 0 | 1      | ME  |
| S9-wms-combined_36459 | Unassigned | Unassigned | Unassigned | 338_0  | Clustered               | 5   | VC_338_0  | 5   | 0.3309 | 0.999999987 | 0.3309 | 0 | 0 | 0 | 1      | ME  |
| S9-wms-combined_37587 | Unassigned | Unassigned | Unassigned | 1473_0 | Clustered               | 3   | VC_1473_0 | 3   | 0.7237 | 0.99613166  | 0.7209 | 0 | 0 | 0 | 0.6667 | ME  |
| S9-wms-combined_3878  | Unassigned | Unassigned | Unassigned | 1510_0 | Clustered               | 2   | VC_1510_0 | 2   | 1      | 1           | 1      | 0 | 0 | 0 | 1      | ME  |
| S9-wms-combined_44402 | Unassigned | Unassigned | Unassigned | 680_0  | Clustered               | 2   | VC_680_0  | 2   | 0.1163 | 0.94939599  | 0.1104 | 0 | 0 | 0 | 1      | ME  |
| S9-wms-combined_53991 | Unassigned | Unassigned | Unassigned | 947_0  | Clustered               | 3   | VC_947_0  | 3   | 0.0374 | 0.84591675  | 0.0316 | 0 | 0 | 0 | 1      | ME  |
| S9-wms-combined_5526  | Unassigned | Unassigned | Unassigned | 832_0  | Clustered               | 2   | VC_832_0  | 2   | 0.2344 | 0.94526139  | 0.2215 | 0 | 0 | 0 | 1      | ME  |
| S9-wms-combined_56773 | Unassigned | Unassigned | Unassigned | 1481_0 | Clustered               | 9   | VC_1481_0 | 9   | 0.9416 | 0.77917309  | 0.7337 | 0 | 0 | 0 | 1      | ME  |
| S9-wms-combined_64277 | Unassigned | Unassigned | Unassigned | 250_0  | Clustered               | 4   | VC_250_0  | 4   | 0.2395 | 0.99998241  | 0.2395 | 0 | 0 | 0 | 1      | ME  |
| S9-wms-combined_71647 | Unassigned | Unassigned | Unassigned | 420_0  | Clustered               | 6   | VC_420_0  | 6   | 0.2282 | 0.97462081  | 0.2224 | 0 | 0 | 0 | 1      | ME  |
| S9-wms-combined_76274 | Unassigned | Unassigned | Unassigned | 854_0  | Clustered               | 2   | VC_854_0  | 2   | 0.4056 | 0.9446828   | 0.3831 | 0 | 0 | 0 | 1      | ME  |
| S9-wms-combined_89249 | Unassigned | Unassigned | Unassigned | 947_0  | Clustered               | 3   | VC_947_0  | 3   | 0.0374 | 0.84591675  | 0.0316 | 0 | 0 | 0 | 1      | ME  |
| S9-wms-combined_9931  | Unassigned | Unassigned | Unassigned | 626_1  | Clustered/Singleton     | 1   | VC_626_1  | 1   | 0      | 1           | 0      | 0 | 0 | 0 | 1      | ME  |
| S9-wms_104169         | Unassigned | Unassigned | Unassigned | 1423_0 | Clustered               | 8   | VC_1423_0 | 8   | 0.896  | 0.99983932  | 0.8959 | 0 | 0 | 0 | 1      | ME  |
| S9-wms_128232         | Unassigned | Unassigned | Unassigned | 1243_0 | Clustered               | 52  | VC_1243_0 | 52  | 0.9126 | 0.92708311  | 0.8461 | 0 | 0 | 0 | 1      | ME  |
| S9-wms_19025          | Unassigned | Unassigned | Unassigned | 535_0  | Clustered               | 2   | VC_535_0  | 2   | 0.1332 | 0.94063346  | 0.1253 | 0 | 0 | 0 | 1      | ME  |
| S9-wms_64472          | Unassigned | Unassigned | Unassigned | 1512_0 | Clustered               | 2   | VC_1512_0 | 2   | 1      | 1           | 1      | 0 | 0 | 0 | 1      | ME  |
| SFU82619              | Unassigned | Unassigned | Unassigned | 45_0   | Clustered               | 12  | VC_45_0   | 12  | 0.35   | 1           | 0.35   | 0 | 0 | 0 | 1      | Ref |
| SVU28974              | Unassigned | Unassigned | Unassigned | 794_0  | Clustered               | 3   | VC_794_0  | 3   | 1      | 1           | 1      | 0 | 0 | 0 | 1      | Ref |
| U08974                | Unassigned | Unassigned | Unassigned | 254_0  | Clustered               | 46  | VC_254_0  | 46  | 0.5159 | 1           | 0.5159 | 0 | 0 | 0 | 1      | Ref |
| V01146                | Unassigned | Unassigned | Unassigned | 392_0  | Clustered               | 126 | VC_392_0  | 126 | 0.9621 | 1           | 0.9621 | 0 | 0 | 0 | 1      | Ref |
| X07234                | Unassigned | Unassigned | Unassigned | 599_0  | Clustered               | 50  | VC_599_0  | 50  | 0.9989 | 1           | 0.9989 | 0 | 0 | 0 | 1      | Ref |
| X51344                | Unassigned | Unassigned | Unassigned | 794_0  | Clustered               | 3   | VC_794_0  | 3   | 1      | 1           | 1      | 0 | 0 | 0 | 1      | Ref |
| X60322                | Unassigned | Unassigned | Unassigned | 743_0  | Clustered               | 15  | VC_743_0  | 15  | 1      | 1           | 1      | 0 | 0 | 0 | 1      | Ref |
| X60323                | Unassigned | Unassigned | Unassigned | 743_0  | Clustered               | 15  | VC_743_0  | 15  | 1      | 1           | 1      | 0 | 0 | 0 | 1      | Ref |
| X97918                | Unassigned | Unassigned | Unassigned | 104_0  | Clustered               | 6   | VC_104_0  | 6   | 0.8291 | 1           | 0.8291 | 0 | 0 | 0 | 1      | Ref |
| X98106                | Unassigned | Unassigned | Unassigned | 309_0  | Clustered               | 3   | VC_309_0  | 3   | 0.1265 | 0.99498896  | 0.1258 | 0 | 0 | 0 | 1      | Ref |
| X99260                | Unassigned | Unassigned | Unassigned | 817_0  | Clustered               | 14  | VC_817_0  | 14  | 0.6342 | 1           | 0.6342 | 0 | 0 | 0 | 1      | Ref |
| Y13918                | Unassigned | Unassigned | Unassigned | 2_0    | Clustered               | 4   | VC_2_0    | 4   | 0.1311 | 0.99998692  | 0.1311 | 0 | 0 | 0 | 1      | Ref |
| Z18946                | Unassigned | Unassigned | Unassigned | 215_2  | Clustered               | 5   | VC_215_2  | 5   | 0.0572 | 0.99999997  | 0.0572 | 0 | 0 | 0 | 1      | Ref |
| Z47794                | Unassigned | Unassigned | Unassigned | 1048_0 | Clustered               | 3   | VC_1048_0 | 3   | 1      | 1           | 1      | 0 | 0 | 0 | 1      | Ref |
| AB255436              | Unassigned | Unassigned | Unassigned |        | Outlier                 |     |           |     |        |             |        |   |   |   |        | Ref |
| AB451219              | Unassigned | Unassigned | Unassigned |        | Overlap (VC_71/VC_72)   |     |           |     |        |             |        |   |   |   |        | Ref |
| AB605730              | Unassigned | Unassigned | Unassigned |        | Overlap (VC_87/VC_88)   |     |           |     |        |             |        |   |   |   |        | Ref |
| AB711120              | Unassigned | Unassigned | Unassigned |        | Outlier                 |     |           |     |        |             |        |   |   |   |        | Ref |
| AB767244              | Unassigned | Unassigned | Unassigned |        | Overlap (VC_121/VC_124) |     |           |     |        |             |        |   |   |   |        | Ref |
| AB823818              | Unassigned | Unassigned | Unassigned |        | Overlap (VC_138/VC_146) |     |           |     |        |             |        |   |   |   |        | Ref |
| AB967974              | Unassigned | Unassigned | Unassigned |        | Outlier                 |     |           |     |        |             |        |   |   |   |        | Ref |
| AO64539               | Unassigned | Unassigned | Unassigned |        | Outlier                 |     |           |     |        |             |        |   |   |   |        | Ref |
| AO68845               | Unassigned | Unassigned | Unassigned |        | Overlap (VC_236/VC_238) |     |           |     |        |             |        |   |   |   |        | Ref |
| AO69308               | Unassigned | Unassigned | Unassigned |        | Overlap (VC_31/VC_34)   |     |           |     |        |             |        |   |   |   |        | Ref |
| AO69529               | Unassigned | Unassigned | Unassigned |        | Overlap (VC_31/VC_34)   |     |           |     |        |             |        |   |   |   |        | Ref |
| AO74945               | Unassigned | Unassigned | Unassigned |        | Outlier                 |     |           |     |        |             |        |   |   |   |        | Ref |
| AF109874              | Unassigned | Unassigned | Unassigned |        | Overlap (VC_257/VC_262) |     |           |     |        |             |        |   |   |   |        | Ref |
| AF143772              | Unassigned | Unassigned | Unassigned |        | Singleton               |     |           |     |        |             |        |   |   |   |        | Ref |
| AF191796              | Unassigned | Unassigned | Unassigned |        | Singleton               |     |           |     |        |             |        |   |   |   |        | Ref |
| AF242738              | Unassigned | Unassigned | Unassigned |        | Overlap (VC_263/VC_318) |     |           |     |        |             |        |   |   |   |        | Ref |
| AF246223              | Unassigned | Unassigned | Unassigned |        | Singleton               |     |           |     |        |             |        |   |   |   |        | Ref |
| AF304433              | Unassigned | Unassigned | Unassigned |        | Overlap (VC_257/VC_262) |     |           |     |        |             |        |   |   |   |        | Ref |
| AF323670              | Unassigned | Unassigned | Unassigned |        | Overlap (VC_261/VC_265) |     |           |     |        |             |        |   |   |   |        | Ref |
| AF323672              | Unassigned | Unassigned | Unassigned |        | Outlier                 |     |           |     |        |             |        |   |   |   |        | Ref |
| AF323673              | Unassigned | Unassigned | Unassigned |        | Outlier                 |     |           |     |        |             |        |   |   |   |        | Ref |
| AF349457              | Unassigned | Unassigned | Unassigned |        | Overlap (VC_257/VC_262) |     |           |     |        |             |        |   |   |   |        | Ref |
| AF428260              | Unassigned | Unassigned | Unassigned |        | Singleton               |     |           |     |        |             |        |   |   |   |        | Ref |
| AF448724              | Unassigned | Unassigned | Unassigned |        | Outlier                 |     |           |     |        |             |        |   |   |   |        | Ref |
| AF543311              | Unassigned | Unassigned | Unassigned |        | Overlap (VC_365/VC_366) |     |           |     |        |             |        |   |   |   |        | Ref |
| AJ304858              | Unassigned | Unassigned | Unassigned |        | Outlier                 |     |           |     |        |             |        |   |   |   |        | Ref |
| AJ564013              | Unassigned | Unassigned | Unassigned |        | Outlier                 |     |           |     |        |             |        |   |   |   |        | Ref |
| AJ567472              | Unassigned | Unassigned | Unassigned |        | Outlier                 |     |           |     |        |             |        |   |   |   |        | Ref |
| AJ697969              | Unassigned | Unassigned | Unassigned |        | Overlap (VC_442/VC_443) |     |           |     |        |             |        |   |   |   |        | Ref |
| AJ842011              | Unassigned | Unassigned | Unassigned |        | Outlier                 |     |           |     |        |             |        |   |   |   |        | Ref |
| AJ972879              | Unassigned | Unassigned | Unassigned |        | Outlier                 |     |           |     |        |             |        |   |   |   |        | Ref |
| AM265639              | Unassigned | Unassigned | Unassigned |        | Outlier                 |     |           |     |        |             |        |   |   |   |        | Ref |
| AP000400              | Unassigned | Unassigned | Unassigned |        | Outlier                 |     |           |     |        |             |        |   |   |   |        | Ref |
| AP009624              | Unassigned | Unassigned | Unassigned |        | Overlap (VC_177/VC_296) |     |           |     |        |             |        |   |   |   |        | Ref |
| AP012533              | Unassigned | Unassigned | Unassigned |        | Outlier                 |     |           |     |        |             |        |   |   |   |        | Ref |
| AP012536              | Unassigned | Unassigned | Unassigned |        | Overlap (VC_42/VC_57)   |     |           |     |        |             |        |   |   |   |        | Ref |
| AP012537              | Unassigned | Unassigned | Unassigned |        | Overlap (VC_42/VC_57)   |     |           |     |        |             |        |   |   |   |        | Ref |
| AP013057              | Unassigned | Unassigned | Unassigned |        | Overlap (VC_121/VC_124) |     |           |     |        |             |        |   |   |   |        | Ref |
| AP013540              | Unassigned | Unassigned | Unassigned |        | Overlap (VC_481/VC_482) |     |           |     |        |             |        |   |   |   |        | Ref |
| AP013543              | Unassigned | Unassigned | Unassigned |        | Overlap (VC_481/VC_482) |     |           |     |        |             |        |   |   |   |        | Ref |
| AP013549              | Unassigned | Unassigned | Unassigned |        | Outlier                 |     |           |     |        |             |        |   |   |   |        | Ref |
| AP014629              | Unassigned | Unassigned | Unassigned |        | Overlap (VC_367/VC_369) |     |           |     |        |             |        |   |   |   |        | Ref |
| AP014684              | Unassigned | Unassigned | Unassigned |        | Outlier                 |     |           |     |        |             |        |   |   |   |        | Ref |
| AP014693              | Unassigned | Unassigned | Unassigned |        | Overlap (VC_344/VC_346) |     |           |     |        |             |        |   |   |   |        | Ref |
| AP014927              | Unassigned | Unassigned | Unassigned |        | Overlap (VC_344/VC_346) |     |           |     |        |             |        |   |   |   |        | Ref |
| AP017903              | Unassigned | Unassigned | Unassigned |        | Outlier                 |     |           |     |        |             |        |   |   |   |        | Ref |
| AP017972              | Unassigned | Unassigned | Unassigned |        | Overlap (VC_442/VC_443) |     |           |     |        |             |        |   |   |   |        | Ref |
| AP018486              | Unassigned | Unassigned | Unassigned |        | Outlier                 |     |           |     |        |             |        |   |   |   |        | Ref |



|                 |            |            |            |                         |     |
|-----------------|------------|------------|------------|-------------------------|-----|
| AP019415        | Unassigned | Unassigned | Unassigned | Outlier                 | Ref |
| AY082070        | Unassigned | Unassigned | Unassigned | Overlap (VC_20/VC_542)  | Ref |
| AY095314        | Unassigned | Unassigned | Unassigned | Outlier                 | Ref |
| AY129336        | Unassigned | Unassigned | Unassigned | Overlap (VC_524/VC_546) | Ref |
| AY266303        | Unassigned | Unassigned | Unassigned | Overlap (VC_444/VC_580) | Ref |
| AY357582        | Unassigned | Unassigned | Unassigned | Outlier                 | Ref |
| AY368235        | Unassigned | Unassigned | Unassigned | Overlap (VC_365/VC_366) | Ref |
| AY369265        | Unassigned | Unassigned | Unassigned | Overlap (VC_365/VC_366) | Ref |
| AY374414        | Unassigned | Unassigned | Unassigned | Outlier                 | Ref |
| AY459533        | Unassigned | Unassigned | Unassigned | Outlier                 | Ref |
| AY459535        | Unassigned | Unassigned | Unassigned | Outlier                 | Ref |
| AY576273        | Unassigned | Unassigned | Unassigned | Outlier                 | Ref |
| AY576796        | Unassigned | Unassigned | Unassigned | Singleton               | Ref |
| AY616033        | Unassigned | Unassigned | Unassigned | Outlier                 | Ref |
| AY616446        | Unassigned | Unassigned | Unassigned | Outlier                 | Ref |
| AY657002        | Unassigned | Unassigned | Unassigned | Overlap (VC_633/VC_634) | Ref |
| AY736146        | Unassigned | Unassigned | Unassigned | Outlier                 | Ref |
| AY766464        | Unassigned | Unassigned | Unassigned | Outlier                 | Ref |
| AY894696        | Unassigned | Unassigned | Unassigned | Outlier                 | Ref |
| AY954948        | Unassigned | Unassigned | Unassigned | Outlier                 | Ref |
| AY954950        | Unassigned | Unassigned | Unassigned | Outlier                 | Ref |
| AY954958        | Unassigned | Unassigned | Unassigned | Outlier                 | Ref |
| AY954959        | Unassigned | Unassigned | Unassigned | Outlier                 | Ref |
| AY954970        | Unassigned | Unassigned | Unassigned | Outlier                 | Ref |
| AY986977        | Unassigned | Unassigned | Unassigned | Outlier                 | Ref |
| B2U02303        | Unassigned | Unassigned | Unassigned | Outlier                 | Ref |
| B4PORFSX        | Unassigned | Unassigned | Unassigned | Outlier                 | Ref |
| BK059157        | Unassigned | Unassigned | Unassigned | Singleton               | Ref |
| BK059162        | Unassigned | Unassigned | Unassigned | Singleton               | Ref |
| BL2CG           | Unassigned | Unassigned | Unassigned | Singleton               | Ref |
| BL5GENM         | Unassigned | Unassigned | Unassigned | Singleton               | Ref |
| BX571876        | Unassigned | Unassigned | Unassigned | Outlier                 | Ref |
| CAJDKB010000002 | Unassigned | Unassigned | Unassigned | Overlap (VC_695/VC_696) | Ref |
| CAKLQB020000002 | Unassigned | Unassigned | Unassigned | Outlier                 | Ref |
| CP002889        | Unassigned | Unassigned | Unassigned | Outlier                 | Ref |
| CP003186        | Unassigned | Unassigned | Unassigned | Outlier                 | Ref |
| CP011103        | Unassigned | Unassigned | Unassigned | Outlier                 | Ref |
| CP014526        | Unassigned | Unassigned | Unassigned | Outlier                 | Ref |
| CP017837        | Unassigned | Unassigned | Unassigned | Outlier                 | Ref |
| CP017838        | Unassigned | Unassigned | Unassigned | Singleton               | Ref |
| CP018841        | Unassigned | Unassigned | Unassigned | Outlier                 | Ref |
| CP019719        | Unassigned | Unassigned | Unassigned | Outlier                 | Ref |
| CP025712        | Unassigned | Unassigned | Unassigned | Outlier                 | Ref |
| CP025713        | Unassigned | Unassigned | Unassigned | Outlier                 | Ref |
| CP025887        | Unassigned | Unassigned | Unassigned | Outlier                 | Ref |
| CP025902        | Unassigned | Unassigned | Unassigned | Outlier                 | Ref |
| CP025907        | Unassigned | Unassigned | Unassigned | Outlier                 | Ref |
| CP038625        | Unassigned | Unassigned | Unassigned | Outlier                 | Ref |
| CP050061        | Unassigned | Unassigned | Unassigned | Overlap (VC_257/VC_262) | Ref |
| CP051275        | Unassigned | Unassigned | Unassigned | Outlier                 | Ref |
| CP052843        | Unassigned | Unassigned | Unassigned | Outlier                 | Ref |
| CP058906        | Unassigned | Unassigned | Unassigned | Outlier                 | Ref |
| CP062450        | Unassigned | Unassigned | Unassigned | Outlier                 | Ref |
| CP063417        | Unassigned | Unassigned | Unassigned | Outlier                 | Ref |
| CP063964        | Unassigned | Unassigned | Unassigned | Outlier                 | Ref |
| CP063968        | Unassigned | Unassigned | Unassigned | Outlier                 | Ref |
| CP084202        | Unassigned | Unassigned | Unassigned | Overlap (VC_737/VC_738) | Ref |
| CP103976        | Unassigned | Unassigned | Unassigned | Outlier                 | Ref |
| CU468217        | Unassigned | Unassigned | Unassigned | Singleton               | Ref |
| DQ079869        | Unassigned | Unassigned | Unassigned | Overlap (VC_362/VC_363) | Ref |
| DQ079877        | Unassigned | Unassigned | Unassigned | Overlap (VC_361/VC_363) | Ref |
| DQ079898        | Unassigned | Unassigned | Unassigned | Overlap (VC_361/VC_363) | Ref |
| DQ079905        | Unassigned | Unassigned | Unassigned | Overlap (VC_361/VC_363) | Ref |
| DQ079907        | Unassigned | Unassigned | Unassigned | Overlap (VC_361/VC_363) | Ref |
| DQ149023        | Unassigned | Unassigned | Unassigned | Overlap (VC_435/VC_656) | Ref |
| DQ203855        | Unassigned | Unassigned | Unassigned | Outlier                 | Ref |
| DQ372923        | Unassigned | Unassigned | Unassigned | Outlier                 | Ref |
| DQ394806        | Unassigned | Unassigned | Unassigned | Overlap (VC_257/VC_262) | Ref |
| DQ453159        | Unassigned | Unassigned | Unassigned | Outlier                 | Ref |
| DQ499600        | Unassigned | Unassigned | Unassigned | Outlier                 | Ref |
| DQ535032        | Unassigned | Unassigned | Unassigned | Singleton               | Ref |
| DQ831957        | Unassigned | Unassigned | Unassigned | Overlap (VC_13/VC_70)   | Ref |
| DQ834250        | Unassigned | Unassigned | Unassigned | Overlap (VC_13/VC_70)   | Ref |
| DQ838728        | Unassigned | Unassigned | Unassigned | Overlap (VC_257/VC_262) | Ref |
| EF071488        | Unassigned | Unassigned | Unassigned | Singleton               | Ref |
| EF116926        | Unassigned | Unassigned | Unassigned | Overlap (VC_319/VC_626) | Ref |
| EF207558        | Unassigned | Unassigned | Unassigned | Overlap (VC_324/VC_539) | Ref |
| EF456602        | Unassigned | Unassigned | Unassigned | Overlap (VC_310/VC_620) | Ref |
| EF523948        | Unassigned | Unassigned | Unassigned | Outlier                 | Ref |
| EF579802        | Unassigned | Unassigned | Unassigned | Outlier                 | Ref |
| EF602154        | Unassigned | Unassigned | Unassigned | Overlap (VC_365/VC_366) | Ref |



|              |            |            |            |                                |     |
|--------------|------------|------------|------------|--------------------------------|-----|
| EU307292     | Unassigned | Unassigned | Unassigned | Outlier                        | Ref |
| EU409559     | Unassigned | Unassigned | Unassigned | Outlier                        | Ref |
| EU438902     | Unassigned | Unassigned | Unassigned | Singleton                      | Ref |
| EU719189     | Unassigned | Unassigned | Unassigned | Overlap (VC_140/VC_649)        | Ref |
| EU822883     | Unassigned | Unassigned | Unassigned | Outlier                        | Ref |
| EU849489     | Unassigned | Unassigned | Unassigned | Outlier                        | Ref |
| EU871039     | Unassigned | Unassigned | Unassigned | Outlier                        | Ref |
| EU876853     | Unassigned | Unassigned | Unassigned | Outlier                        | Ref |
| EU982300     | Unassigned | Unassigned | Unassigned | Outlier                        | Ref |
| FI174692     | Unassigned | Unassigned | Unassigned | Overlap (VC_521/VC_548)        | Ref |
| FI792813     | Unassigned | Unassigned | Unassigned | Outlier                        | Ref |
| FI982340     | Unassigned | Unassigned | Unassigned | Outlier                        | Ref |
| FM163528     | Unassigned | Unassigned | Unassigned | Outlier                        | Ref |
| FN436268     | Unassigned | Unassigned | Unassigned | Singleton                      | Ref |
| FN582354     | Unassigned | Unassigned | Unassigned | Outlier                        | Ref |
| FPL101000048 | Unassigned | Unassigned | Unassigned | Singleton                      | Ref |
| FQ482085     | Unassigned | Unassigned | Unassigned | Outlier                        | Ref |
| FR725450     | Unassigned | Unassigned | Unassigned | Singleton                      | Ref |
| GQ334450     | Unassigned | Unassigned | Unassigned | Overlap (VC_436/VC_859)        | Ref |
| GQ357915     | Unassigned | Unassigned | Unassigned | Outlier                        | Ref |
| GQ478086     | Unassigned | Unassigned | Unassigned | Overlap (VC_606/VC_775)        | Ref |
| GQ478087     | Unassigned | Unassigned | Unassigned | Overlap (VC_606/VC_775)        | Ref |
| GQ478088     | Unassigned | Unassigned | Unassigned | Overlap (VC_431/VC_742)        | Ref |
| GQ900512     | Unassigned | Unassigned | Unassigned | Outlier                        | Ref |
| GU071090     | Unassigned | Unassigned | Unassigned | Overlap (VC_436/VC_859)        | Ref |
| GU071096     | Unassigned | Unassigned | Unassigned | Overlap (VC_656/VC_661)        | Ref |
| GU071101     | Unassigned | Unassigned | Unassigned | Outlier                        | Ref |
| GU071108     | Unassigned | Unassigned | Unassigned | Overlap (VC_656/VC_662/VC_664) | Ref |
| GU075905     | Unassigned | Unassigned | Unassigned | Outlier                        | Ref |
| GU233956     | Unassigned | Unassigned | Unassigned | Outlier                        | Ref |
| GU323318     | Unassigned | Unassigned | Unassigned | Overlap (VC_286/VC_290/VC_491) | Ref |
| GU396103     | Unassigned | Unassigned | Unassigned | Overlap (VC_444/VC_580)        | Ref |
| GU568037     | Unassigned | Unassigned | Unassigned | Outlier                        | Ref |
| GU580940     | Unassigned | Unassigned | Unassigned | Outlier                        | Ref |
| GU580943     | Unassigned | Unassigned | Unassigned | Outlier                        | Ref |
| GU722197     | Unassigned | Unassigned | Unassigned | Singleton                      | Ref |
| GU815339     | Unassigned | Unassigned | Unassigned | Outlier                        | Ref |
| GU936714     | Unassigned | Unassigned | Unassigned | Outlier                        | Ref |
| GU943031     | Unassigned | Unassigned | Unassigned | Outlier                        | Ref |
| GU943068     | Unassigned | Unassigned | Unassigned | Outlier                        | Ref |
| GU949551     | Unassigned | Unassigned | Unassigned | Outlier                        | Ref |
| GU967410     | Unassigned | Unassigned | Unassigned | Outlier                        | Ref |
| HE580238     | Unassigned | Unassigned | Unassigned | Singleton                      | Ref |
| HE611333     | Unassigned | Unassigned | Unassigned | Outlier                        | Ref |
| HE614281     | Unassigned | Unassigned | Unassigned | Overlap (VC_654/VC_747)        | Ref |
| HE614282     | Unassigned | Unassigned | Unassigned | Overlap (VC_654/VC_747)        | Ref |
| HE681887     | Unassigned | Unassigned | Unassigned | Singleton                      | Ref |
| HG798806     | Unassigned | Unassigned | Unassigned | Overlap (VC_177/VC_296)        | Ref |
| HM114277     | Unassigned | Unassigned | Unassigned | Overlap (VC_560/VC_562/VC_563) | Ref |
| HM144385     | Unassigned | Unassigned | Unassigned | Outlier                        | Ref |
| HM144386     | Unassigned | Unassigned | Unassigned | Outlier                        | Ref |
| HM151342     | Unassigned | Unassigned | Unassigned | Overlap (VC_169/VC_472)        | Ref |
| HM159959     | Unassigned | Unassigned | Unassigned | Outlier                        | Ref |
| HM173637     | Unassigned | Unassigned | Unassigned | Overlap (VC_31/VC_34)          | Ref |
| HM246720     | Unassigned | Unassigned | Unassigned | Outlier                        | Ref |
| HM246722     | Unassigned | Unassigned | Unassigned | Outlier                        | Ref |
| HM246723     | Unassigned | Unassigned | Unassigned | Outlier                        | Ref |
| HM246724     | Unassigned | Unassigned | Unassigned | Outlier                        | Ref |
| HM452126     | Unassigned | Unassigned | Unassigned | Overlap (VC_444/VC_580)        | Ref |
| HM486077     | Unassigned | Unassigned | Unassigned | Outlier                        | Ref |
| HM596271     | Unassigned | Unassigned | Unassigned | Outlier                        | Ref |
| HQ225832     | Unassigned | Unassigned | Unassigned | Singleton                      | Ref |
| HQ264138     | Unassigned | Unassigned | Unassigned | Singleton                      | Ref |
| HQ316580     | Unassigned | Unassigned | Unassigned | Outlier                        | Ref |
| HQ317383     | Unassigned | Unassigned | Unassigned | Overlap (VC_656/VC_663)        | Ref |
| HQ317385     | Unassigned | Unassigned | Unassigned | Overlap (VC_435/VC_656)        | Ref |
| HQ331142     | Unassigned | Unassigned | Unassigned | Overlap (VC_286/VC_290/VC_491) | Ref |
| HQ332139     | Unassigned | Unassigned | Unassigned | Outlier                        | Ref |
| HQ615693     | Unassigned | Unassigned | Unassigned | Outlier                        | Ref |
| HQ634153     | Unassigned | Unassigned | Unassigned | Outlier                        | Ref |
| HQ634174     | Unassigned | Unassigned | Unassigned | Outlier                        | Ref |
| HQ634178     | Unassigned | Unassigned | Unassigned | Overlap (VC_656/VC_662/VC_664) | Ref |
| HQ634191     | Unassigned | Unassigned | Unassigned | Overlap (VC_435/VC_656)        | Ref |
| HQ634193     | Unassigned | Unassigned | Unassigned | Outlier                        | Ref |
| HQ634194     | Unassigned | Unassigned | Unassigned | Overlap (VC_788/VC_931)        | Ref |
| HQ634196     | Unassigned | Unassigned | Unassigned | Overlap (VC_788/VC_931)        | Ref |
| HQ641380     | Unassigned | Unassigned | Unassigned | Outlier                        | Ref |
| HQ728266     | Unassigned | Unassigned | Unassigned | Outlier                        | Ref |
| JF270478     | Unassigned | Unassigned | Unassigned | Outlier                        | Ref |
| JF314845     | Unassigned | Unassigned | Unassigned | Outlier                        | Ref |
| JF317274     | Unassigned | Unassigned | Unassigned | Outlier                        | Ref |



|          |            |            |            |                         |     |
|----------|------------|------------|------------|-------------------------|-----|
| JF344709 | Unassigned | Unassigned | Unassigned | Outlier                 | Ref |
| JF412294 | Unassigned | Unassigned | Unassigned | Outlier                 | Ref |
| JF412295 | Unassigned | Unassigned | Unassigned | Outlier                 | Ref |
| JF412297 | Unassigned | Unassigned | Unassigned | Outlier                 | Ref |
| JF412298 | Unassigned | Unassigned | Unassigned | Singleton               | Ref |
| JF412299 | Unassigned | Unassigned | Unassigned | Outlier                 | Ref |
| JF412300 | Unassigned | Unassigned | Unassigned | Singleton               | Ref |
| JF412301 | Unassigned | Unassigned | Unassigned | Singleton               | Ref |
| JF412302 | Unassigned | Unassigned | Unassigned | Outlier                 | Ref |
| JF704115 | Unassigned | Unassigned | Unassigned | Overlap (VC_524/VC_546) | Ref |
| JF912400 | Unassigned | Unassigned | Unassigned | Overlap (VC_584/VC_586) | Ref |
| JF974288 | Unassigned | Unassigned | Unassigned | Overlap (VC_435/VC_656) | Ref |
| JF974289 | Unassigned | Unassigned | Unassigned | Overlap (VC_435/VC_656) | Ref |
| JF974292 | Unassigned | Unassigned | Unassigned | Overlap (VC_656/VC_661) | Ref |
| JF974293 | Unassigned | Unassigned | Unassigned | Overlap (VC_435/VC_656) | Ref |
| JF974296 | Unassigned | Unassigned | Unassigned | Overlap (VC_788/VC_931) | Ref |
| JF974315 | Unassigned | Unassigned | Unassigned | Outlier                 | Ref |
| JN116825 | Unassigned | Unassigned | Unassigned | Singleton               | Ref |
| JN191664 | Unassigned | Unassigned | Unassigned | Overlap (VC_705/VC_747) | Ref |
| JN192400 | Unassigned | Unassigned | Unassigned | Overlap (VC_13/VC_70)   | Ref |
| JN192401 | Unassigned | Unassigned | Unassigned | Overlap (VC_13/VC_70)   | Ref |
| JN371768 | Unassigned | Unassigned | Unassigned | Overlap (VC_656/VC_664) | Ref |
| JN564907 | Unassigned | Unassigned | Unassigned | Outlier                 | Ref |
| JN638751 | Unassigned | Unassigned | Unassigned | Outlier                 | Ref |
| JN700519 | Unassigned | Unassigned | Unassigned | Outlier                 | Ref |
| JN700520 | Unassigned | Unassigned | Unassigned | Outlier                 | Ref |
| JN700521 | Unassigned | Unassigned | Unassigned | Overlap (VC_14/VC_15)   | Ref |
| JN831654 | Unassigned | Unassigned | Unassigned | Overlap (VC_227/VC_941) | Ref |
| JN880423 | Unassigned | Unassigned | Unassigned | Singleton               | Ref |
| JN882265 | Unassigned | Unassigned | Unassigned | Outlier                 | Ref |
| JN991020 | Unassigned | Unassigned | Unassigned | Overlap (VC_71/VC_74)   | Ref |
| JQ011316 | Unassigned | Unassigned | Unassigned | Outlier                 | Ref |
| JQ066768 | Unassigned | Unassigned | Unassigned | Outlier                 | Ref |
| JQ086369 | Unassigned | Unassigned | Unassigned | Overlap (VC_31/VC_34)   | Ref |
| JQ086370 | Unassigned | Unassigned | Unassigned | Overlap (VC_31/VC_34)   | Ref |
| JQ086371 | Unassigned | Unassigned | Unassigned | Outlier                 | Ref |
| JQ086372 | Unassigned | Unassigned | Unassigned | Overlap (VC_31/VC_34)   | Ref |
| JQ086373 | Unassigned | Unassigned | Unassigned | Overlap (VC_31/VC_34)   | Ref |
| JQ086374 | Unassigned | Unassigned | Unassigned | Overlap (VC_31/VC_34)   | Ref |
| JQ086377 | Unassigned | Unassigned | Unassigned | Overlap (VC_31/VC_34)   | Ref |
| JQ177062 | Unassigned | Unassigned | Unassigned | Outlier                 | Ref |
| JQ177065 | Unassigned | Unassigned | Unassigned | Outlier                 | Ref |
| JQ182726 | Unassigned | Unassigned | Unassigned | Overlap (VC_31/VC_34)   | Ref |
| JQ182727 | Unassigned | Unassigned | Unassigned | Overlap (VC_31/VC_34)   | Ref |
| JQ182730 | Unassigned | Unassigned | Unassigned | Outlier                 | Ref |
| JQ182731 | Unassigned | Unassigned | Unassigned | Overlap (VC_31/VC_34)   | Ref |
| JQ182732 | Unassigned | Unassigned | Unassigned | Overlap (VC_31/VC_34)   | Ref |
| JQ246028 | Unassigned | Unassigned | Unassigned | Outlier                 | Ref |
| JQ267518 | Unassigned | Unassigned | Unassigned | Outlier                 | Ref |
| JQ288021 | Unassigned | Unassigned | Unassigned | Outlier                 | Ref |
| JQ340088 | Unassigned | Unassigned | Unassigned | Outlier                 | Ref |
| JQ341413 | Unassigned | Unassigned | Unassigned | Singleton               | Ref |
| JQ362498 | Unassigned | Unassigned | Unassigned | Outlier                 | Ref |
| JQ446452 | Unassigned | Unassigned | Unassigned | Outlier                 | Ref |
| JQ660954 | Unassigned | Unassigned | Unassigned | Overlap (VC_20/VC_542)  | Ref |
| JQ740787 | Unassigned | Unassigned | Unassigned | Overlap (VC_203/VC_204) | Ref |
| JQ740788 | Unassigned | Unassigned | Unassigned | Overlap (VC_203/VC_204) | Ref |
| JQ740789 | Unassigned | Unassigned | Unassigned | Overlap (VC_203/VC_205) | Ref |
| JQ740790 | Unassigned | Unassigned | Unassigned | Overlap (VC_203/VC_205) | Ref |
| JQ740791 | Unassigned | Unassigned | Unassigned | Overlap (VC_203/VC_204) | Ref |
| JQ740792 | Unassigned | Unassigned | Unassigned | Overlap (VC_203/VC_205) | Ref |
| JQ740793 | Unassigned | Unassigned | Unassigned | Overlap (VC_203/VC_204) | Ref |
| JQ740794 | Unassigned | Unassigned | Unassigned | Overlap (VC_203/VC_204) | Ref |
| JQ740795 | Unassigned | Unassigned | Unassigned | Overlap (VC_203/VC_205) | Ref |
| JQ740796 | Unassigned | Unassigned | Unassigned | Overlap (VC_203/VC_205) | Ref |
| JQ740797 | Unassigned | Unassigned | Unassigned | Overlap (VC_203/VC_205) | Ref |
| JQ740798 | Unassigned | Unassigned | Unassigned | Overlap (VC_203/VC_204) | Ref |
| JQ740799 | Unassigned | Unassigned | Unassigned | Overlap (VC_203/VC_204) | Ref |
| JQ740800 | Unassigned | Unassigned | Unassigned | Overlap (VC_203/VC_204) | Ref |
| JQ740801 | Unassigned | Unassigned | Unassigned | Overlap (VC_203/VC_204) | Ref |
| JQ740802 | Unassigned | Unassigned | Unassigned | Overlap (VC_203/VC_204) | Ref |
| JQ740803 | Unassigned | Unassigned | Unassigned | Overlap (VC_203/VC_204) | Ref |
| JQ740804 | Unassigned | Unassigned | Unassigned | Overlap (VC_203/VC_205) | Ref |
| JQ740805 | Unassigned | Unassigned | Unassigned | Overlap (VC_203/VC_205) | Ref |
| JQ740806 | Unassigned | Unassigned | Unassigned | Overlap (VC_203/VC_204) | Ref |
| JQ740807 | Unassigned | Unassigned | Unassigned | Overlap (VC_203/VC_205) | Ref |
| JQ740808 | Unassigned | Unassigned | Unassigned | Overlap (VC_203/VC_205) | Ref |
| JQ740809 | Unassigned | Unassigned | Unassigned | Overlap (VC_203/VC_204) | Ref |
| JQ740810 | Unassigned | Unassigned | Unassigned | Overlap (VC_203/VC_204) | Ref |
| JQ740811 | Unassigned | Unassigned | Unassigned | Overlap (VC_203/VC_204) | Ref |
| JQ740812 | Unassigned | Unassigned | Unassigned | Overlap (VC_203/VC_205) | Ref |



|          |            |            |            |                                  |     |
|----------|------------|------------|------------|----------------------------------|-----|
| JQ740813 | Unassigned | Unassigned | Unassigned | Overlap (VC_203/VC_205)          | Ref |
| JQ740814 | Unassigned | Unassigned | Unassigned | Overlap (VC_203/VC_204)          | Ref |
| JQ768459 | Unassigned | Unassigned | Unassigned | Outlier                          | Ref |
| JQ801337 | Unassigned | Unassigned | Unassigned | Outlier                          | Ref |
| JQ806764 | Unassigned | Unassigned | Unassigned | Outlier                          | Ref |
| JQ809663 | Unassigned | Unassigned | Unassigned | Outlier                          | Ref |
| JQ809702 | Unassigned | Unassigned | Unassigned | Overlap (VC_524/VC_546)          | Ref |
| JQ867099 | Unassigned | Unassigned | Unassigned | Outlier                          | Ref |
| JQ867100 | Unassigned | Unassigned | Unassigned | Overlap (VC_897/VC_926)          | Ref |
| JX006077 | Unassigned | Unassigned | Unassigned | Outlier                          | Ref |
| JX015524 | Unassigned | Unassigned | Unassigned | Overlap (VC_227/VC_941)          | Ref |
| JX145341 | Unassigned | Unassigned | Unassigned | Overlap (VC_140/VC_649)          | Ref |
| JX181814 | Unassigned | Unassigned | Unassigned | Outlier                          | Ref |
| JX181815 | Unassigned | Unassigned | Unassigned | Outlier                          | Ref |
| JX181816 | Unassigned | Unassigned | Unassigned | Outlier                          | Ref |
| JX181817 | Unassigned | Unassigned | Unassigned | Outlier                          | Ref |
| JX181823 | Unassigned | Unassigned | Unassigned | Outlier                          | Ref |
| JX181825 | Unassigned | Unassigned | Unassigned | Overlap (VC_286/VC_290/VC_491)   | Ref |
| JX195166 | Unassigned | Unassigned | Unassigned | Outlier                          | Ref |
| JX409894 | Unassigned | Unassigned | Unassigned | Overlap (VC_294/VC_320)          | Ref |
| JX409895 | Unassigned | Unassigned | Unassigned | Overlap (VC_294/VC_320)          | Ref |
| JX411620 | Unassigned | Unassigned | Unassigned | Overlap (VC_521/VC_548)          | Ref |
| JX509734 | Unassigned | Unassigned | Unassigned | Outlier                          | Ref |
| JX560521 | Unassigned | Unassigned | Unassigned | Outlier                          | Ref |
| JX676771 | Unassigned | Unassigned | Unassigned | Outlier                          | Ref |
| JX871397 | Unassigned | Unassigned | Unassigned | Outlier                          | Ref |
| JX944686 | Unassigned | Unassigned | Unassigned | Outlier                          | Ref |
| KC117378 | Unassigned | Unassigned | Unassigned | Outlier                          | Ref |
| KC131024 | Unassigned | Unassigned | Unassigned | Overlap (VC_998/VC_1000/VC_1002) | Ref |
| KC131130 | Unassigned | Unassigned | Unassigned | Overlap (VC_442/VC_443)          | Ref |
| KC139516 | Unassigned | Unassigned | Unassigned | Outlier                          | Ref |
| KC292025 | Unassigned | Unassigned | Unassigned | Singleton                        | Ref |
| KC348598 | Unassigned | Unassigned | Unassigned | Overlap (VC_318/VC_319)          | Ref |
| KC348599 | Unassigned | Unassigned | Unassigned | Overlap (VC_294/VC_383)          | Ref |
| KC348604 | Unassigned | Unassigned | Unassigned | Outlier                          | Ref |
| KC413987 | Unassigned | Unassigned | Unassigned | Outlier                          | Ref |
| KC460990 | Unassigned | Unassigned | Unassigned | Outlier                          | Ref |
| KC462197 | Unassigned | Unassigned | Unassigned | Outlier                          | Ref |
| KC465899 | Unassigned | Unassigned | Unassigned | Outlier                          | Ref |
| KC465900 | Unassigned | Unassigned | Unassigned | Overlap (VC_481/VC_482)          | Ref |
| KC595516 | Unassigned | Unassigned | Unassigned | Outlier                          | Ref |
| KC688701 | Unassigned | Unassigned | Unassigned | Outlier                          | Ref |
| KC787101 | Unassigned | Unassigned | Unassigned | Overlap (VC_236/VC_238)          | Ref |
| KC821611 | Unassigned | Unassigned | Unassigned | Singleton                        | Ref |
| KC821624 | Unassigned | Unassigned | Unassigned | Outlier                          | Ref |
| KC821626 | Unassigned | Unassigned | Unassigned | Singleton                        | Ref |
| KC832325 | Unassigned | Unassigned | Unassigned | Outlier                          | Ref |
| KC847113 | Unassigned | Unassigned | Unassigned | Outlier                          | Ref |
| KF017003 | Unassigned | Unassigned | Unassigned | Overlap (VC_524/VC_546)          | Ref |
| KF017004 | Unassigned | Unassigned | Unassigned | Overlap (VC_521/VC_549)          | Ref |
| KF017005 | Unassigned | Unassigned | Unassigned | Overlap (VC_521/VC_548)          | Ref |
| KF030445 | Unassigned | Unassigned | Unassigned | Outlier                          | Ref |
| KF044309 | Unassigned | Unassigned | Unassigned | Overlap (VC_362/VC_363)          | Ref |
| KF044310 | Unassigned | Unassigned | Unassigned | Overlap (VC_362/VC_363)          | Ref |
| KF114878 | Unassigned | Unassigned | Unassigned | Singleton                        | Ref |
| KF147891 | Unassigned | Unassigned | Unassigned | Outlier                          | Ref |
| KF147927 | Unassigned | Unassigned | Unassigned | Overlap (VC_267/VC_606)          | Ref |
| KF156339 | Unassigned | Unassigned | Unassigned | Overlap (VC_656/VC_664)          | Ref |
| KF156340 | Unassigned | Unassigned | Unassigned | Overlap (VC_656/VC_666)          | Ref |
| KF183314 | Unassigned | Unassigned | Unassigned | Overlap (VC_267/VC_606)          | Ref |
| KF183315 | Unassigned | Unassigned | Unassigned | Overlap (VC_267/VC_606)          | Ref |
| KF188409 | Unassigned | Unassigned | Unassigned | Overlap (VC_310/VC_620)          | Ref |
| KF188458 | Unassigned | Unassigned | Unassigned | Outlier                          | Ref |
| KF279414 | Unassigned | Unassigned | Unassigned | Overlap (VC_227/VC_941)          | Ref |
| KF296718 | Unassigned | Unassigned | Unassigned | Overlap (VC_705/VC_747)          | Ref |
| KF301602 | Unassigned | Unassigned | Unassigned | Outlier                          | Ref |
| KF356198 | Unassigned | Unassigned | Unassigned | Outlier                          | Ref |
| KF547926 | Unassigned | Unassigned | Unassigned | Singleton                        | Ref |
| KF589919 | Unassigned | Unassigned | Unassigned | Overlap (VC_14/VC_15)            | Ref |
| KF626666 | Unassigned | Unassigned | Unassigned | Overlap (VC_75/VC_115)           | Ref |
| KF669656 | Unassigned | Unassigned | Unassigned | Outlier                          | Ref |
| KF669658 | Unassigned | Unassigned | Unassigned | Outlier                          | Ref |
| KF669661 | Unassigned | Unassigned | Unassigned | Overlap (VC_1006/VC_1007)        | Ref |
| KF669663 | Unassigned | Unassigned | Unassigned | Overlap (VC_1006/VC_1007)        | Ref |
| KF772233 | Unassigned | Unassigned | Unassigned | Outlier                          | Ref |
| KF772234 | Unassigned | Unassigned | Unassigned | Outlier                          | Ref |
| KF811200 | Unassigned | Unassigned | Unassigned | Overlap (VC_750/VC_751)          | Ref |
| KJ000058 | Unassigned | Unassigned | Unassigned | Overlap (VC_286/VC_290/VC_491)   | Ref |
| KJ010489 | Unassigned | Unassigned | Unassigned | Overlap (VC_695/VC_696)          | Ref |
| KJ018209 | Unassigned | Unassigned | Unassigned | Outlier                          | Ref |
| KJ018210 | Unassigned | Unassigned | Unassigned | Outlier                          | Ref |



|          |            |            |            |                                |     |
|----------|------------|------------|------------|--------------------------------|-----|
| KJ018211 | Unassigned | Unassigned | Unassigned | Outlier                        | Ref |
| KJ018212 | Unassigned | Unassigned | Unassigned | Outlier                        | Ref |
| KJ018214 | Unassigned | Unassigned | Unassigned | Outlier                        | Ref |
| KJ019026 | Unassigned | Unassigned | Unassigned | Overlap (VC_656/VC_666)        | Ref |
| KJ019027 | Unassigned | Unassigned | Unassigned | Overlap (VC_656/VC_664)        | Ref |
| KJ019030 | Unassigned | Unassigned | Unassigned | Overlap (VC_656/VC_666)        | Ref |
| KJ019033 | Unassigned | Unassigned | Unassigned | Overlap (VC_656/VC_666)        | Ref |
| KJ019038 | Unassigned | Unassigned | Unassigned | Overlap (VC_656/VC_666)        | Ref |
| KJ019039 | Unassigned | Unassigned | Unassigned | Overlap (VC_656/VC_666)        | Ref |
| KJ019040 | Unassigned | Unassigned | Unassigned | Overlap (VC_656/VC_664)        | Ref |
| KJ019041 | Unassigned | Unassigned | Unassigned | Overlap (VC_656/VC_664)        | Ref |
| KJ019042 | Unassigned | Unassigned | Unassigned | Overlap (VC_656/VC_664)        | Ref |
| KJ019043 | Unassigned | Unassigned | Unassigned | Overlap (VC_656/VC_664)        | Ref |
| KJ019044 | Unassigned | Unassigned | Unassigned | Overlap (VC_656/VC_664)        | Ref |
| KJ019049 | Unassigned | Unassigned | Unassigned | Overlap (VC_656/VC_664)        | Ref |
| KJ019051 | Unassigned | Unassigned | Unassigned | Overlap (VC_656/VC_664)        | Ref |
| KJ019055 | Unassigned | Unassigned | Unassigned | Overlap (VC_656/VC_666)        | Ref |
| KJ019060 | Unassigned | Unassigned | Unassigned | Overlap (VC_656/VC_664)        | Ref |
| KJ019061 | Unassigned | Unassigned | Unassigned | Overlap (VC_656/VC_664)        | Ref |
| KJ019063 | Unassigned | Unassigned | Unassigned | Overlap (VC_656/VC_664)        | Ref |
| KJ019064 | Unassigned | Unassigned | Unassigned | Overlap (VC_656/VC_664)        | Ref |
| KJ019065 | Unassigned | Unassigned | Unassigned | Overlap (VC_656/VC_666)        | Ref |
| KJ019067 | Unassigned | Unassigned | Unassigned | Overlap (VC_656/VC_666)        | Ref |
| KJ019068 | Unassigned | Unassigned | Unassigned | Overlap (VC_656/VC_666)        | Ref |
| KJ019071 | Unassigned | Unassigned | Unassigned | Overlap (VC_656/VC_664)        | Ref |
| KJ019076 | Unassigned | Unassigned | Unassigned | Overlap (VC_656/VC_666)        | Ref |
| KJ019081 | Unassigned | Unassigned | Unassigned | Overlap (VC_656/VC_666)        | Ref |
| KJ019084 | Unassigned | Unassigned | Unassigned | Overlap (VC_656/VC_666)        | Ref |
| KJ019087 | Unassigned | Unassigned | Unassigned | Overlap (VC_656/VC_666)        | Ref |
| KJ019088 | Unassigned | Unassigned | Unassigned | Overlap (VC_656/VC_666)        | Ref |
| KJ019104 | Unassigned | Unassigned | Unassigned | Overlap (VC_656/VC_664)        | Ref |
| KJ019108 | Unassigned | Unassigned | Unassigned | Overlap (VC_656/VC_664)        | Ref |
| KJ019109 | Unassigned | Unassigned | Unassigned | Overlap (VC_656/VC_664)        | Ref |
| KJ019110 | Unassigned | Unassigned | Unassigned | Overlap (VC_656/VC_664)        | Ref |
| KJ019114 | Unassigned | Unassigned | Unassigned | Overlap (VC_656/VC_666)        | Ref |
| KJ019116 | Unassigned | Unassigned | Unassigned | Overlap (VC_656/VC_666)        | Ref |
| KJ019122 | Unassigned | Unassigned | Unassigned | Overlap (VC_656/VC_666)        | Ref |
| KJ019128 | Unassigned | Unassigned | Unassigned | Overlap (VC_656/VC_664)        | Ref |
| KJ019132 | Unassigned | Unassigned | Unassigned | Overlap (VC_656/VC_664)        | Ref |
| KJ019133 | Unassigned | Unassigned | Unassigned | Overlap (VC_656/VC_664)        | Ref |
| KJ019134 | Unassigned | Unassigned | Unassigned | Overlap (VC_656/VC_664)        | Ref |
| KJ019135 | Unassigned | Unassigned | Unassigned | Overlap (VC_656/VC_666)        | Ref |
| KJ019137 | Unassigned | Unassigned | Unassigned | Overlap (VC_656/VC_666)        | Ref |
| KJ019138 | Unassigned | Unassigned | Unassigned | Overlap (VC_656/VC_666)        | Ref |
| KJ019153 | Unassigned | Unassigned | Unassigned | Overlap (VC_656/VC_666)        | Ref |
| KJ019154 | Unassigned | Unassigned | Unassigned | Overlap (VC_656/VC_664)        | Ref |
| KJ019157 | Unassigned | Unassigned | Unassigned | Overlap (VC_656/VC_666)        | Ref |
| KJ019158 | Unassigned | Unassigned | Unassigned | Overlap (VC_656/VC_666)        | Ref |
| KJ019161 | Unassigned | Unassigned | Unassigned | Overlap (VC_656/VC_664)        | Ref |
| KJ019163 | Unassigned | Unassigned | Unassigned | Overlap (VC_656/VC_666)        | Ref |
| KJ024807 | Unassigned | Unassigned | Unassigned | Overlap (VC_654/VC_747)        | Ref |
| KJ101592 | Unassigned | Unassigned | Unassigned | Overlap (VC_286/VC_290/VC_491) | Ref |
| KJ192196 | Unassigned | Unassigned | Unassigned | Outlier                        | Ref |
| KJ192399 | Unassigned | Unassigned | Unassigned | Outlier                        | Ref |
| KJ395778 | Unassigned | Unassigned | Unassigned | Outlier                        | Ref |
| KJ473423 | Unassigned | Unassigned | Unassigned | Outlier                        | Ref |
| KJ510412 | Unassigned | Unassigned | Unassigned | Overlap (VC_236/VC_238)        | Ref |
| KJ534580 | Unassigned | Unassigned | Unassigned | Singleton                      | Ref |
| KJ545483 | Unassigned | Unassigned | Unassigned | Overlap (VC_129/VC_711)        | Ref |
| KJ567041 | Unassigned | Unassigned | Unassigned | Overlap (VC_524/VC_546)        | Ref |
| KJ572845 | Unassigned | Unassigned | Unassigned | Overlap (VC_129/VC_711)        | Ref |
| KJ608188 | Unassigned | Unassigned | Unassigned | Outlier                        | Ref |
| KJ743987 | Unassigned | Unassigned | Unassigned | Outlier                        | Ref |
| KJ749827 | Unassigned | Unassigned | Unassigned | Overlap (VC_455/VC_1028)       | Ref |
| KJ847052 | Unassigned | Unassigned | Unassigned | Overlap (VC_897/VC_926)        | Ref |
| KJ920400 | Unassigned | Unassigned | Unassigned | Overlap (VC_654/VC_747)        | Ref |
| KJ944830 | Unassigned | Unassigned | Unassigned | Outlier                        | Ref |
| KM000061 | Unassigned | Unassigned | Unassigned | Outlier                        | Ref |
| KM066034 | Unassigned | Unassigned | Unassigned | Overlap (VC_521/VC_548)        | Ref |
| KM083128 | Unassigned | Unassigned | Unassigned | Outlier                        | Ref |
| KM091443 | Unassigned | Unassigned | Unassigned | Overlap (VC_203/VC_206)        | Ref |
| KM091444 | Unassigned | Unassigned | Unassigned | Overlap (VC_203/VC_206)        | Ref |
| KM101124 | Unassigned | Unassigned | Unassigned | Outlier                        | Ref |
| KM209271 | Unassigned | Unassigned | Unassigned | Outlier                        | Ref |
| KM209294 | Unassigned | Unassigned | Unassigned | Outlier                        | Ref |
| KM215148 | Unassigned | Unassigned | Unassigned | Overlap (VC_521/VC_549)        | Ref |
| KM236240 | Unassigned | Unassigned | Unassigned | Overlap (VC_286/VC_290/VC_491) | Ref |
| KM378617 | Unassigned | Unassigned | Unassigned | Overlap (VC_615/VC_754)        | Ref |
| KM514685 | Unassigned | Unassigned | Unassigned | Outlier                        | Ref |
| KM589501 | Unassigned | Unassigned | Unassigned | Overlap (VC_995/VC_996)        | Ref |
| KM589506 | Unassigned | Unassigned | Unassigned | Outlier                        | Ref |



|          |            |            |            |                                |     |
|----------|------------|------------|------------|--------------------------------|-----|
| KM879221 | Unassigned | Unassigned | Unassigned | Outlier                        | Ref |
| KM882824 | Unassigned | Unassigned | Unassigned | Overlap (VC_334/VC_416/VC_430) | Ref |
| KM983327 | Unassigned | Unassigned | Unassigned | Overlap (VC_138/VC_146)        | Ref |
| KM983329 | Unassigned | Unassigned | Unassigned | Overlap (VC_138/VC_146)        | Ref |
| KM983332 | Unassigned | Unassigned | Unassigned | Outlier                        | Ref |
| KP027015 | Unassigned | Unassigned | Unassigned | Outlier                        | Ref |
| KP027206 | Unassigned | Unassigned | Unassigned | Overlap (VC_236/VC_238)        | Ref |
| KP037007 | Unassigned | Unassigned | Unassigned | Outlier                        | Ref |
| KP054477 | Unassigned | Unassigned | Unassigned | Outlier                        | Ref |
| KP063902 | Unassigned | Unassigned | Unassigned | Overlap (VC_649/VC_825)        | Ref |
| KP063903 | Unassigned | Unassigned | Unassigned | Overlap (VC_649/VC_825)        | Ref |
| KP087937 | Unassigned | Unassigned | Unassigned | Singleton                      | Ref |
| KP087940 | Unassigned | Unassigned | Unassigned | Singleton                      | Ref |
| KP087941 | Unassigned | Unassigned | Unassigned | Overlap (VC_199/VC_398)        | Ref |
| KP087944 | Unassigned | Unassigned | Unassigned | Outlier                        | Ref |
| KP087946 | Unassigned | Unassigned | Unassigned | Overlap (VC_199/VC_399)        | Ref |
| KP087947 | Unassigned | Unassigned | Unassigned | Singleton                      | Ref |
| KP087949 | Unassigned | Unassigned | Unassigned | Overlap (VC_199/VC_399)        | Ref |
| KP087950 | Unassigned | Unassigned | Unassigned | Singleton                      | Ref |
| KP087952 | Unassigned | Unassigned | Unassigned | Outlier                        | Ref |
| KP087956 | Unassigned | Unassigned | Unassigned | Outlier                        | Ref |
| KP162168 | Unassigned | Unassigned | Unassigned | Outlier                        | Ref |
| KP211958 | Unassigned | Unassigned | Unassigned | Outlier                        | Ref |
| KP282676 | Unassigned | Unassigned | Unassigned | Outlier                        | Ref |
| KP296792 | Unassigned | Unassigned | Unassigned | Outlier                        | Ref |
| KP682381 | Unassigned | Unassigned | Unassigned | Outlier                        | Ref |
| KP696447 | Unassigned | Unassigned | Unassigned | Overlap (VC_1006/VC_1007)      | Ref |
| KP696448 | Unassigned | Unassigned | Unassigned | Overlap (VC_1006/VC_1007)      | Ref |
| KP703175 | Unassigned | Unassigned | Unassigned | Singleton                      | Ref |
| KP735928 | Unassigned | Unassigned | Unassigned | Overlap (VC_14/VC_15)          | Ref |
| KP774835 | Unassigned | Unassigned | Unassigned | Outlier                        | Ref |
| KP792622 | Unassigned | Unassigned | Unassigned | Singleton                      | Ref |
| KP793101 | Unassigned | Unassigned | Unassigned | Overlap (VC_203/VC_207)        | Ref |
| KP793102 | Unassigned | Unassigned | Unassigned | Overlap (VC_203/VC_207)        | Ref |
| KP793103 | Unassigned | Unassigned | Unassigned | Overlap (VC_203/VC_207)        | Ref |
| KP793106 | Unassigned | Unassigned | Unassigned | Overlap (VC_203/VC_207)        | Ref |
| KP793107 | Unassigned | Unassigned | Unassigned | Overlap (VC_203/VC_208)        | Ref |
| KP793110 | Unassigned | Unassigned | Unassigned | Overlap (VC_203/VC_208)        | Ref |
| KP793112 | Unassigned | Unassigned | Unassigned | Overlap (VC_203/VC_208)        | Ref |
| KP793114 | Unassigned | Unassigned | Unassigned | Overlap (VC_203/VC_208)        | Ref |
| KP793119 | Unassigned | Unassigned | Unassigned | Overlap (VC_203/VC_209)        | Ref |
| KP793120 | Unassigned | Unassigned | Unassigned | Overlap (VC_203/VC_206)        | Ref |
| KP793121 | Unassigned | Unassigned | Unassigned | Overlap (VC_203/VC_206)        | Ref |
| KP793122 | Unassigned | Unassigned | Unassigned | Overlap (VC_203/VC_206)        | Ref |
| KP793125 | Unassigned | Unassigned | Unassigned | Overlap (VC_203/VC_206)        | Ref |
| KP793126 | Unassigned | Unassigned | Unassigned | Overlap (VC_203/VC_206)        | Ref |
| KP793127 | Unassigned | Unassigned | Unassigned | Overlap (VC_203/VC_206)        | Ref |
| KP793128 | Unassigned | Unassigned | Unassigned | Overlap (VC_203/VC_206)        | Ref |
| KP793130 | Unassigned | Unassigned | Unassigned | Overlap (VC_203/VC_206)        | Ref |
| KP793131 | Unassigned | Unassigned | Unassigned | Overlap (VC_203/VC_206)        | Ref |
| KP793132 | Unassigned | Unassigned | Unassigned | Overlap (VC_203/VC_206)        | Ref |
| KP793133 | Unassigned | Unassigned | Unassigned | Overlap (VC_203/VC_207)        | Ref |
| KP793135 | Unassigned | Unassigned | Unassigned | Overlap (VC_203/VC_206)        | Ref |
| KR011061 | Unassigned | Unassigned | Unassigned | Outlier                        | Ref |
| KR053194 | Unassigned | Unassigned | Unassigned | Outlier                        | Ref |
| KR053196 | Unassigned | Unassigned | Unassigned | Outlier                        | Ref |
| KR053199 | Unassigned | Unassigned | Unassigned | Outlier                        | Ref |
| KR053200 | Unassigned | Unassigned | Unassigned | Overlap (VC_1095/VC_1096)      | Ref |
| KR072689 | Unassigned | Unassigned | Unassigned | Outlier                        | Ref |
| KR091942 | Unassigned | Unassigned | Unassigned | Outlier                        | Ref |
| KR093632 | Unassigned | Unassigned | Unassigned | Outlier                        | Ref |
| KR093638 | Unassigned | Unassigned | Unassigned | Outlier                        | Ref |
| KR131710 | Unassigned | Unassigned | Unassigned | Outlier                        | Ref |
| KR153873 | Unassigned | Unassigned | Unassigned | Outlier                        | Ref |
| KR296684 | Unassigned | Unassigned | Unassigned | Outlier                        | Ref |
| KR296685 | Unassigned | Unassigned | Unassigned | Outlier                        | Ref |
| KR296690 | Unassigned | Unassigned | Unassigned | Outlier                        | Ref |
| KR296693 | Unassigned | Unassigned | Unassigned | Outlier                        | Ref |
| KR296694 | Unassigned | Unassigned | Unassigned | Outlier                        | Ref |
| KR296695 | Unassigned | Unassigned | Unassigned | Outlier                        | Ref |
| KR704914 | Unassigned | Unassigned | Unassigned | Outlier                        | Ref |
| KR905066 | Unassigned | Unassigned | Unassigned | Overlap (VC_273/VC_384)        | Ref |
| KR905067 | Unassigned | Unassigned | Unassigned | Overlap (VC_273/VC_384)        | Ref |
| KR905069 | Unassigned | Unassigned | Unassigned | Overlap (VC_273/VC_384)        | Ref |
| KR905070 | Unassigned | Unassigned | Unassigned | Overlap (VC_273/VC_384)        | Ref |
| KT001915 | Unassigned | Unassigned | Unassigned | Overlap (VC_286/VC_290/VC_491) | Ref |
| KT021004 | Unassigned | Unassigned | Unassigned | Outlier                        | Ref |
| KT070868 | Unassigned | Unassigned | Unassigned | Outlier                        | Ref |
| KT184694 | Unassigned | Unassigned | Unassigned | Overlap (VC_227/VC_941)        | Ref |
| KT206225 | Unassigned | Unassigned | Unassigned | Outlier                        | Ref |
| KT221033 | Unassigned | Unassigned | Unassigned | Overlap (VC_376/VC_588)        | Ref |



|          |            |            |            |                                |     |
|----------|------------|------------|------------|--------------------------------|-----|
| KT264770 | Unassigned | Unassigned | Unassigned | Overlap (VC_1106/VC_1107)      | Ref |
| KT264771 | Unassigned | Unassigned | Unassigned | Outlier                        | Ref |
| KT264772 | Unassigned | Unassigned | Unassigned | Outlier                        | Ref |
| KT264773 | Unassigned | Unassigned | Unassigned | Outlier                        | Ref |
| KT264774 | Unassigned | Unassigned | Unassigned | Outlier                        | Ref |
| KT264777 | Unassigned | Unassigned | Unassigned | Overlap (VC_1116/VC_1117)      | Ref |
| KT264778 | Unassigned | Unassigned | Unassigned | Overlap (VC_1116/VC_1117)      | Ref |
| KT264780 | Unassigned | Unassigned | Unassigned | Singleton                      | Ref |
| KT264786 | Unassigned | Unassigned | Unassigned | Singleton                      | Ref |
| KT264787 | Unassigned | Unassigned | Unassigned | Singleton                      | Ref |
| KT264804 | Unassigned | Unassigned | Unassigned | Singleton                      | Ref |
| KT264816 | Unassigned | Unassigned | Unassigned | Overlap (VC_1057/VC_1143)      | Ref |
| KT264817 | Unassigned | Unassigned | Unassigned | Overlap (VC_1057/VC_1143)      | Ref |
| KT264832 | Unassigned | Unassigned | Unassigned | Singleton                      | Ref |
| KT264835 | Unassigned | Unassigned | Unassigned | Outlier                        | Ref |
| KT266805 | Unassigned | Unassigned | Unassigned | Overlap (VC_169/VC_472)        | Ref |
| KT281789 | Unassigned | Unassigned | Unassigned | Overlap (VC_238/VC_240)        | Ref |
| KT319602 | Unassigned | Unassigned | Unassigned | Outlier                        | Ref |
| KT319607 | Unassigned | Unassigned | Unassigned | Outlier                        | Ref |
| KT319620 | Unassigned | Unassigned | Unassigned | Outlier                        | Ref |
| KT319626 | Unassigned | Unassigned | Unassigned | Outlier                        | Ref |
| KT337365 | Unassigned | Unassigned | Unassigned | Outlier                        | Ref |
| KT337370 | Unassigned | Unassigned | Unassigned | Overlap (VC_334/VC_416)        | Ref |
| KT339177 | Unassigned | Unassigned | Unassigned | Outlier                        | Ref |
| KT361651 | Unassigned | Unassigned | Unassigned | Overlap (VC_710/VC_713)        | Ref |
| KT361653 | Unassigned | Unassigned | Unassigned | Overlap (VC_710/VC_713)        | Ref |
| KT429161 | Unassigned | Unassigned | Unassigned | Overlap (VC_14/VC_15)          | Ref |
| KT588072 | Unassigned | Unassigned | Unassigned | Overlap (VC_695/VC_696)        | Ref |
| KT591490 | Unassigned | Unassigned | Unassigned | Overlap (VC_236/VC_238)        | Ref |
| KT630645 | Unassigned | Unassigned | Unassigned | Outlier                        | Ref |
| KT630646 | Unassigned | Unassigned | Unassigned | Outlier                        | Ref |
| KT630648 | Unassigned | Unassigned | Unassigned | Outlier                        | Ref |
| KT716399 | Unassigned | Unassigned | Unassigned | Outlier                        | Ref |
| KT724718 | Unassigned | Unassigned | Unassigned | Outlier                        | Ref |
| KT780304 | Unassigned | Unassigned | Unassigned | Outlier                        | Ref |
| KT803877 | Unassigned | Unassigned | Unassigned | Overlap (VC_368/VC_369)        | Ref |
| KT820175 | Unassigned | Unassigned | Unassigned | Outlier                        | Ref |
| KT852574 | Unassigned | Unassigned | Unassigned | Outlier                        | Ref |
| KT898133 | Unassigned | Unassigned | Unassigned | Outlier                        | Ref |
| KT898134 | Unassigned | Unassigned | Unassigned | Outlier                        | Ref |
| KT967075 | Unassigned | Unassigned | Unassigned | Overlap (VC_705/VC_747)        | Ref |
| KT970645 | Unassigned | Unassigned | Unassigned | Overlap (VC_654/VC_747)        | Ref |
| KT970646 | Unassigned | Unassigned | Unassigned | Overlap (VC_654/VC_747)        | Ref |
| KU052038 | Unassigned | Unassigned | Unassigned | Outlier                        | Ref |
| KU160494 | Unassigned | Unassigned | Unassigned | Outlier                        | Ref |
| KU160495 | Unassigned | Unassigned | Unassigned | Outlier                        | Ref |
| KU160496 | Unassigned | Unassigned | Unassigned | Outlier                        | Ref |
| KU238067 | Unassigned | Unassigned | Unassigned | Outlier                        | Ref |
| KU252585 | Unassigned | Unassigned | Unassigned | Overlap (VC_526/VC_554)        | Ref |
| KU310944 | Unassigned | Unassigned | Unassigned | Outlier                        | Ref |
| KU594605 | Unassigned | Unassigned | Unassigned | Overlap (VC_435/VC_656)        | Ref |
| KU598975 | Unassigned | Unassigned | Unassigned | Overlap (VC_13/VC_70)          | Ref |
| KU645528 | Unassigned | Unassigned | Unassigned | Outlier                        | Ref |
| KU665491 | Unassigned | Unassigned | Unassigned | Outlier                        | Ref |
| KU682439 | Unassigned | Unassigned | Unassigned | Outlier                        | Ref |
| KU686203 | Unassigned | Unassigned | Unassigned | Overlap (VC_656/VC_662/VC_664) | Ref |
| KU686210 | Unassigned | Unassigned | Unassigned | Outlier                        | Ref |
| KU708005 | Unassigned | Unassigned | Unassigned | Singleton                      | Ref |
| KU848186 | Unassigned | Unassigned | Unassigned | Overlap (VC_273/VC_384)        | Ref |
| KU867307 | Unassigned | Unassigned | Unassigned | Overlap (VC_286/VC_290/VC_491) | Ref |
| KU873925 | Unassigned | Unassigned | Unassigned | Outlier                        | Ref |
| KU892558 | Unassigned | Unassigned | Unassigned | Outlier                        | Ref |
| KU935715 | Unassigned | Unassigned | Unassigned | Outlier                        | Ref |
| KU963248 | Unassigned | Unassigned | Unassigned | Outlier                        | Ref |
| KU977419 | Unassigned | Unassigned | Unassigned | Outlier                        | Ref |
| KU977420 | Unassigned | Unassigned | Unassigned | Outlier                        | Ref |
| KU984979 | Unassigned | Unassigned | Unassigned | Overlap (VC_1186/VC_1187)      | Ref |
| KU984980 | Unassigned | Unassigned | Unassigned | Overlap (VC_1186/VC_1187)      | Ref |
| KU998233 | Unassigned | Unassigned | Unassigned | Outlier                        | Ref |
| KX066068 | Unassigned | Unassigned | Unassigned | Overlap (VC_71/VC_74)          | Ref |
| KX077889 | Unassigned | Unassigned | Unassigned | Overlap (VC_319/VC_790)        | Ref |
| KX077890 | Unassigned | Unassigned | Unassigned | Outlier                        | Ref |
| KX077891 | Unassigned | Unassigned | Unassigned | Outlier                        | Ref |
| KX077893 | Unassigned | Unassigned | Unassigned | Outlier                        | Ref |
| KX077895 | Unassigned | Unassigned | Unassigned | Outlier                        | Ref |
| KX119178 | Unassigned | Unassigned | Unassigned | Outlier                        | Ref |
| KX119181 | Unassigned | Unassigned | Unassigned | Outlier                        | Ref |
| KX119183 | Unassigned | Unassigned | Unassigned | Outlier                        | Ref |
| KX130668 | Unassigned | Unassigned | Unassigned | Overlap (VC_458/VC_586)        | Ref |
| KX156762 | Unassigned | Unassigned | Unassigned | Overlap (VC_14/VC_15)          | Ref |
| KX160205 | Unassigned | Unassigned | Unassigned | Overlap (VC_257/VC_262)        | Ref |



[illegible]



|          |            |            |            |                                       |     |
|----------|------------|------------|------------|---------------------------------------|-----|
| KX669658 | Unassigned | Unassigned | Unassigned | Outlier                               | Ref |
| KX688047 | Unassigned | Unassigned | Unassigned | Overlap (VC_236/VC_238)               | Ref |
| KX808132 | Unassigned | Unassigned | Unassigned | Overlap (VC_238/VC_240)               | Ref |
| KX815270 | Unassigned | Unassigned | Unassigned | Singleton                             | Ref |
| KX833905 | Unassigned | Unassigned | Unassigned | Outlier                               | Ref |
| KX853513 | Unassigned | Unassigned | Unassigned | Singleton                             | Ref |
| KX853514 | Unassigned | Unassigned | Unassigned | Singleton                             | Ref |
| KX879752 | Unassigned | Unassigned | Unassigned | Outlier                               | Ref |
| KX905163 | Unassigned | Unassigned | Unassigned | Outlier                               | Ref |
| KX911187 | Unassigned | Unassigned | Unassigned | Outlier                               | Ref |
| KX965989 | Unassigned | Unassigned | Unassigned | Outlier                               | Ref |
| KX982260 | Unassigned | Unassigned | Unassigned | Overlap (VC_897/VC_926)               | Ref |
| KY012363 | Unassigned | Unassigned | Unassigned | Overlap (VC_521/VC_548)               | Ref |
| KY038360 | Unassigned | Unassigned | Unassigned | Outlier                               | Ref |
| KY053532 | Unassigned | Unassigned | Unassigned | Outlier                               | Ref |
| KY065457 | Unassigned | Unassigned | Unassigned | Outlier                               | Ref |
| KY065464 | Unassigned | Unassigned | Unassigned | Outlier                               | Ref |
| KY065467 | Unassigned | Unassigned | Unassigned | Outlier                               | Ref |
| KY065481 | Unassigned | Unassigned | Unassigned | Overlap (VC_334/VC_416)               | Ref |
| KY065482 | Unassigned | Unassigned | Unassigned | Overlap (VC_334/VC_416)               | Ref |
| KY065483 | Unassigned | Unassigned | Unassigned | Overlap (VC_334/VC_416)               | Ref |
| KY065484 | Unassigned | Unassigned | Unassigned | Overlap (VC_334/VC_416)               | Ref |
| KY065489 | Unassigned | Unassigned | Unassigned | Overlap (VC_334/VC_416)               | Ref |
| KY124276 | Unassigned | Unassigned | Unassigned | Overlap (VC_392/VC_395)               | Ref |
| KY245949 | Unassigned | Unassigned | Unassigned | Outlier                               | Ref |
| KY245950 | Unassigned | Unassigned | Unassigned | Outlier                               | Ref |
| KY250034 | Unassigned | Unassigned | Unassigned | Overlap (VC_455/VC_1028)              | Ref |
| KY250035 | Unassigned | Unassigned | Unassigned | Overlap (VC_392/VC_395)               | Ref |
| KY271400 | Unassigned | Unassigned | Unassigned | Outlier                               | Ref |
| KY363359 | Unassigned | Unassigned | Unassigned | Overlap (VC_334/VC_416/VC_430/VC_777) | Ref |
| KY417925 | Unassigned | Unassigned | Unassigned | Outlier                               | Ref |
| KY420199 | Unassigned | Unassigned | Unassigned | Outlier                               | Ref |
| KY421186 | Unassigned | Unassigned | Unassigned | Outlier                               | Ref |
| KY442063 | Unassigned | Unassigned | Unassigned | Overlap (VC_97/VC_99)                 | Ref |
| KY471386 | Unassigned | Unassigned | Unassigned | Overlap (VC_97/VC_99)                 | Ref |
| KY499642 | Unassigned | Unassigned | Unassigned | Outlier                               | Ref |
| KY606587 | Unassigned | Unassigned | Unassigned | Outlier                               | Ref |
| KY619305 | Unassigned | Unassigned | Unassigned | Overlap (VC_458/VC_586)               | Ref |
| KY653116 | Unassigned | Unassigned | Unassigned | Outlier                               | Ref |
| KY653117 | Unassigned | Unassigned | Unassigned | Outlier                               | Ref |
| KY653118 | Unassigned | Unassigned | Unassigned | Outlier                               | Ref |
| KY653120 | Unassigned | Unassigned | Unassigned | Overlap (VC_13/VC_70)                 | Ref |
| KY653124 | Unassigned | Unassigned | Unassigned | Overlap (VC_14/VC_15)                 | Ref |
| KY653126 | Unassigned | Unassigned | Unassigned | Overlap (VC_14/VC_15)                 | Ref |
| KY653127 | Unassigned | Unassigned | Unassigned | Outlier                               | Ref |
| KY653129 | Unassigned | Unassigned | Unassigned | Outlier                               | Ref |
| KY695239 | Unassigned | Unassigned | Unassigned | Outlier                               | Ref |
| KY695241 | Unassigned | Unassigned | Unassigned | Outlier                               | Ref |
| KY697807 | Unassigned | Unassigned | Unassigned | Singleton                             | Ref |
| KY702574 | Unassigned | Unassigned | Unassigned | Overlap (VC_521/VC_549)               | Ref |
| KY709687 | Unassigned | Unassigned | Unassigned | Outlier                               | Ref |
| KY742649 | Unassigned | Unassigned | Unassigned | Overlap (VC_932/VC_1050)              | Ref |
| KY798216 | Unassigned | Unassigned | Unassigned | Outlier                               | Ref |
| KY821088 | Unassigned | Unassigned | Unassigned | Outlier                               | Ref |
| KY888885 | Unassigned | Unassigned | Unassigned | Outlier                               | Ref |
| KY914485 | Unassigned | Unassigned | Unassigned | Outlier                               | Ref |
| KY921761 | Unassigned | Unassigned | Unassigned | Outlier                               | Ref |
| KY939598 | Unassigned | Unassigned | Unassigned | Outlier                               | Ref |
| KY940711 | Unassigned | Unassigned | Unassigned | Outlier                               | Ref |
| KY945241 | Unassigned | Unassigned | Unassigned | Overlap (VC_435/VC_656)               | Ref |
| KY971609 | Unassigned | Unassigned | Unassigned | Overlap (VC_596/VC_599)               | Ref |
| KY979108 | Unassigned | Unassigned | Unassigned | Overlap (VC_31/VC_34)                 | Ref |
| KY979132 | Unassigned | Unassigned | Unassigned | Outlier                               | Ref |
| KY981271 | Unassigned | Unassigned | Unassigned | Outlier                               | Ref |
| LC121084 | Unassigned | Unassigned | Unassigned | Outlier                               | Ref |
| LC208019 | Unassigned | Unassigned | Unassigned | Singleton                             | Ref |
| LC216347 | Unassigned | Unassigned | Unassigned | Overlap (VC_392/VC_395)               | Ref |
| LC371242 | Unassigned | Unassigned | Unassigned | Overlap (VC_286/VC_491)               | Ref |
| LC483177 | Unassigned | Unassigned | Unassigned | Outlier                               | Ref |
| LC487996 | Unassigned | Unassigned | Unassigned | Outlier                               | Ref |
| LC487997 | Unassigned | Unassigned | Unassigned | Outlier                               | Ref |
| LC513943 | Unassigned | Unassigned | Unassigned | Overlap (VC_695/VC_696)               | Ref |
| LC554890 | Unassigned | Unassigned | Unassigned | Outlier                               | Ref |
| LC557520 | Unassigned | Unassigned | Unassigned | Outlier                               | Ref |
| LC567818 | Unassigned | Unassigned | Unassigned | Overlap (VC_41/VC_42)                 | Ref |
| LC567819 | Unassigned | Unassigned | Unassigned | Overlap (VC_41/VC_42)                 | Ref |
| LC567820 | Unassigned | Unassigned | Unassigned | Overlap (VC_41/VC_42)                 | Ref |
| LC567821 | Unassigned | Unassigned | Unassigned | Overlap (VC_41/VC_42)                 | Ref |
| LC567822 | Unassigned | Unassigned | Unassigned | Overlap (VC_41/VC_42/VC_426)          | Ref |
| LC567823 | Unassigned | Unassigned | Unassigned | Overlap (VC_41/VC_42)                 | Ref |
| LC567824 | Unassigned | Unassigned | Unassigned | Overlap (VC_41/VC_42)                 | Ref |



|          |            |            |            |                                |     |
|----------|------------|------------|------------|--------------------------------|-----|
| LC567825 | Unassigned | Unassigned | Unassigned | Overlap (VC_41/VC_42)          | Ref |
| LC567826 | Unassigned | Unassigned | Unassigned | Overlap (VC_41/VC_42/VC_426)   | Ref |
| LC567827 | Unassigned | Unassigned | Unassigned | Overlap (VC_41/VC_42)          | Ref |
| LC567828 | Unassigned | Unassigned | Unassigned | Overlap (VC_41/VC_42/VC_426)   | Ref |
| LC567829 | Unassigned | Unassigned | Unassigned | Overlap (VC_41/VC_42)          | Ref |
| LC567831 | Unassigned | Unassigned | Unassigned | Overlap (VC_41/VC_42)          | Ref |
| LC567832 | Unassigned | Unassigned | Unassigned | Overlap (VC_41/VC_42/VC_426)   | Ref |
| LC567833 | Unassigned | Unassigned | Unassigned | Overlap (VC_41/VC_42)          | Ref |
| LC567834 | Unassigned | Unassigned | Unassigned | Overlap (VC_41/VC_42)          | Ref |
| LC567835 | Unassigned | Unassigned | Unassigned | Overlap (VC_41/VC_42)          | Ref |
| LC567836 | Unassigned | Unassigned | Unassigned | Overlap (VC_41/VC_42/VC_426)   | Ref |
| LC567837 | Unassigned | Unassigned | Unassigned | Overlap (VC_41/VC_42)          | Ref |
| LC567839 | Unassigned | Unassigned | Unassigned | Overlap (VC_41/VC_42/VC_426)   | Ref |
| LC567840 | Unassigned | Unassigned | Unassigned | Overlap (VC_41/VC_42)          | Ref |
| LC567841 | Unassigned | Unassigned | Unassigned | Overlap (VC_41/VC_42)          | Ref |
| LC592711 | Unassigned | Unassigned | Unassigned | Overlap (VC_344/VC_346)        | Ref |
| LC644971 | Unassigned | Unassigned | Unassigned | Outlier                        | Ref |
| LC644973 | Unassigned | Unassigned | Unassigned | Outlier                        | Ref |
| LC645439 | Unassigned | Unassigned | Unassigned | Outlier                        | Ref |
| LC645440 | Unassigned | Unassigned | Unassigned | Outlier                        | Ref |
| LC645441 | Unassigned | Unassigned | Unassigned | Outlier                        | Ref |
| LC667450 | Unassigned | Unassigned | Unassigned | Overlap (VC_344/VC_346)        | Ref |
| LC667451 | Unassigned | Unassigned | Unassigned | Outlier                        | Ref |
| LC727876 | Unassigned | Unassigned | Unassigned | Overlap (VC_42/VC_57)          | Ref |
| LC727877 | Unassigned | Unassigned | Unassigned | Overlap (VC_42/VC_57)          | Ref |
| LC727878 | Unassigned | Unassigned | Unassigned | Overlap (VC_42/VC_57)          | Ref |
| LC727879 | Unassigned | Unassigned | Unassigned | Overlap (VC_42/VC_57)          | Ref |
| LC727880 | Unassigned | Unassigned | Unassigned | Overlap (VC_42/VC_57)          | Ref |
| LC727881 | Unassigned | Unassigned | Unassigned | Overlap (VC_42/VC_57)          | Ref |
| LC727882 | Unassigned | Unassigned | Unassigned | Overlap (VC_42/VC_57)          | Ref |
| LC727883 | Unassigned | Unassigned | Unassigned | Overlap (VC_42/VC_57)          | Ref |
| LC727884 | Unassigned | Unassigned | Unassigned | Overlap (VC_42/VC_57)          | Ref |
| LC727885 | Unassigned | Unassigned | Unassigned | Overlap (VC_42/VC_57)          | Ref |
| LC727886 | Unassigned | Unassigned | Unassigned | Overlap (VC_42/VC_57)          | Ref |
| LC727887 | Unassigned | Unassigned | Unassigned | Overlap (VC_42/VC_57)          | Ref |
| LC727888 | Unassigned | Unassigned | Unassigned | Overlap (VC_42/VC_57)          | Ref |
| LC727889 | Unassigned | Unassigned | Unassigned | Overlap (VC_42/VC_57)          | Ref |
| LC727890 | Unassigned | Unassigned | Unassigned | Overlap (VC_42/VC_57)          | Ref |
| LC727904 | Unassigned | Unassigned | Unassigned | Outlier                        | Ref |
| LN681539 | Unassigned | Unassigned | Unassigned | Overlap (VC_140/VC_649)        | Ref |
| LN885237 | Unassigned | Unassigned | Unassigned | Outlier                        | Ref |
| LN889991 | Unassigned | Unassigned | Unassigned | Overlap (VC_32/VC_33/VC_901)   | Ref |
| LN889992 | Unassigned | Unassigned | Unassigned | Overlap (VC_32/VC_33/VC_901)   | Ref |
| LN889993 | Unassigned | Unassigned | Unassigned | Outlier                        | Ref |
| LN890663 | Unassigned | Unassigned | Unassigned | Overlap (VC_750/VC_751)        | Ref |
| LR595862 | Unassigned | Unassigned | Unassigned | Outlier                        | Ref |
| LR597645 | Unassigned | Unassigned | Unassigned | Outlier                        | Ref |
| LR745208 | Unassigned | Unassigned | Unassigned | Singleton                      | Ref |
| LR756500 | Unassigned | Unassigned | Unassigned | Outlier                        | Ref |
| LR756508 | Unassigned | Unassigned | Unassigned | Outlier                        | Ref |
| LR756511 | Unassigned | Unassigned | Unassigned | Outlier                        | Ref |
| LR881103 | Unassigned | Unassigned | Unassigned | Outlier                        | Ref |
| LR990833 | Unassigned | Unassigned | Unassigned | Overlap (VC_695/VC_696)        | Ref |
| LR990834 | Unassigned | Unassigned | Unassigned | Outlier                        | Ref |
| LR991625 | Unassigned | Unassigned | Unassigned | Overlap (VC_695/VC_696)        | Ref |
| LT614807 | Unassigned | Unassigned | Unassigned | Overlap (VC_286/VC_290/VC_491) | Ref |
| LT960607 | Unassigned | Unassigned | Unassigned | Outlier                        | Ref |
| LT960610 | Unassigned | Unassigned | Unassigned | Overlap (VC_87/VC_88)          | Ref |
| LT985570 | Unassigned | Unassigned | Unassigned | Overlap (VC_257/VC_262)        | Ref |
| LT985573 | Unassigned | Unassigned | Unassigned | Outlier                        | Ref |
| LT985577 | Unassigned | Unassigned | Unassigned | Outlier                        | Ref |
| LT985579 | Unassigned | Unassigned | Unassigned | Outlier                        | Ref |
| LT985580 | Unassigned | Unassigned | Unassigned | Singleton                      | Ref |
| LT985582 | Unassigned | Unassigned | Unassigned | Overlap (VC_271/VC_292)        | Ref |
| LT985585 | Unassigned | Unassigned | Unassigned | Overlap (VC_271/VC_292)        | Ref |
| LT985588 | Unassigned | Unassigned | Unassigned | Outlier                        | Ref |
| LT985590 | Unassigned | Unassigned | Unassigned | Singleton                      | Ref |
| LT985591 | Unassigned | Unassigned | Unassigned | Outlier                        | Ref |
| LT985592 | Unassigned | Unassigned | Unassigned | Outlier                        | Ref |
| LT992259 | Unassigned | Unassigned | Unassigned | Outlier                        | Ref |
| LT993225 | Unassigned | Unassigned | Unassigned | Outlier                        | Ref |
| LT996072 | Unassigned | Unassigned | Unassigned | Overlap (VC_271/VC_292)        | Ref |
| LT996073 | Unassigned | Unassigned | Unassigned | Outlier                        | Ref |
| LT996074 | Unassigned | Unassigned | Unassigned | Outlier                        | Ref |
| LT996075 | Unassigned | Unassigned | Unassigned | Overlap (VC_257/VC_262)        | Ref |
| LT996076 | Unassigned | Unassigned | Unassigned | Overlap (VC_261/VC_265)        | Ref |
| LT996077 | Unassigned | Unassigned | Unassigned | Outlier                        | Ref |
| LT996078 | Unassigned | Unassigned | Unassigned | Overlap (VC_257/VC_262)        | Ref |
| LT996079 | Unassigned | Unassigned | Unassigned | Outlier                        | Ref |
| MF001367 | Unassigned | Unassigned | Unassigned | Outlier                        | Ref |
| MF036690 | Unassigned | Unassigned | Unassigned | Overlap (VC_286/VC_491)        | Ref |



|          |            |            |            |                                |     |
|----------|------------|------------|------------|--------------------------------|-----|
| MP036691 | Unassigned | Unassigned | Unassigned | Overlap (VC_286/VC_491)        | Ref |
| MP036692 | Unassigned | Unassigned | Unassigned | Overlap (VC_286/VC_491)        | Ref |
| MF042361 | Unassigned | Unassigned | Unassigned | Outlier                        | Ref |
| MF140408 | Unassigned | Unassigned | Unassigned | Overlap (VC_236/VC_238)        | Ref |
| MF140411 | Unassigned | Unassigned | Unassigned | Overlap (VC_236/VC_238)        | Ref |
| MF141539 | Unassigned | Unassigned | Unassigned | Outlier                        | Ref |
| MF186604 | Unassigned | Unassigned | Unassigned | Singleton                      | Ref |
| MF190168 | Unassigned | Unassigned | Unassigned | Overlap (VC_521/VC_548)        | Ref |
| MF360958 | Unassigned | Unassigned | Unassigned | Outlier                        | Ref |
| MF361639 | Unassigned | Unassigned | Unassigned | Singleton                      | Ref |
| MF403008 | Unassigned | Unassigned | Unassigned | Outlier                        | Ref |
| MF403009 | Unassigned | Unassigned | Unassigned | Outlier                        | Ref |
| MF415410 | Unassigned | Unassigned | Unassigned | Overlap (VC_593/VC_597)        | Ref |
| MF415411 | Unassigned | Unassigned | Unassigned | Overlap (VC_593/VC_597)        | Ref |
| MF415413 | Unassigned | Unassigned | Unassigned | Overlap (VC_593/VC_597)        | Ref |
| MF417929 | Unassigned | Unassigned | Unassigned | Outlier                        | Ref |
| MF459646 | Unassigned | Unassigned | Unassigned | Overlap (VC_442/VC_443)        | Ref |
| MF459647 | Unassigned | Unassigned | Unassigned | Overlap (VC_442/VC_443)        | Ref |
| MF472893 | Unassigned | Unassigned | Unassigned | Outlier                        | Ref |
| MF472895 | Unassigned | Unassigned | Unassigned | Outlier                        | Ref |
| MF476924 | Unassigned | Unassigned | Unassigned | Overlap (VC_593/VC_597)        | Ref |
| MF477236 | Unassigned | Unassigned | Unassigned | Outlier                        | Ref |
| MF497422 | Unassigned | Unassigned | Unassigned | Overlap (VC_342/VC_1215)       | Ref |
| MF630922 | Unassigned | Unassigned | Unassigned | Outlier                        | Ref |
| MF668271 | Unassigned | Unassigned | Unassigned | Overlap (VC_521/VC_548)        | Ref |
| MF668281 | Unassigned | Unassigned | Unassigned | Overlap (VC_521/VC_548)        | Ref |
| MF668286 | Unassigned | Unassigned | Unassigned | Outlier                        | Ref |
| MF774687 | Unassigned | Unassigned | Unassigned | Outlier                        | Ref |
| MF774689 | Unassigned | Unassigned | Unassigned | Outlier                        | Ref |
| MF775669 | Unassigned | Unassigned | Unassigned | Overlap (VC_203/VC_211)        | Ref |
| MF775670 | Unassigned | Unassigned | Unassigned | Overlap (VC_203/VC_211)        | Ref |
| MF775671 | Unassigned | Unassigned | Unassigned | Overlap (VC_203/VC_211)        | Ref |
| MF775672 | Unassigned | Unassigned | Unassigned | Overlap (VC_203/VC_211)        | Ref |
| MF775673 | Unassigned | Unassigned | Unassigned | Overlap (VC_203/VC_211)        | Ref |
| MF775674 | Unassigned | Unassigned | Unassigned | Overlap (VC_203/VC_211)        | Ref |
| MF775675 | Unassigned | Unassigned | Unassigned | Overlap (VC_203/VC_211)        | Ref |
| MF775676 | Unassigned | Unassigned | Unassigned | Overlap (VC_203/VC_211)        | Ref |
| MF775677 | Unassigned | Unassigned | Unassigned | Overlap (VC_203/VC_211)        | Ref |
| MF775678 | Unassigned | Unassigned | Unassigned | Overlap (VC_203/VC_211)        | Ref |
| MF775679 | Unassigned | Unassigned | Unassigned | Overlap (VC_203/VC_211)        | Ref |
| MF775680 | Unassigned | Unassigned | Unassigned | Overlap (VC_203/VC_211)        | Ref |
| MF775681 | Unassigned | Unassigned | Unassigned | Overlap (VC_203/VC_211)        | Ref |
| MF775682 | Unassigned | Unassigned | Unassigned | Overlap (VC_203/VC_211)        | Ref |
| MF775683 | Unassigned | Unassigned | Unassigned | Overlap (VC_203/VC_211)        | Ref |
| MF775684 | Unassigned | Unassigned | Unassigned | Overlap (VC_203/VC_211)        | Ref |
| MF775685 | Unassigned | Unassigned | Unassigned | Overlap (VC_203/VC_211)        | Ref |
| MF775686 | Unassigned | Unassigned | Unassigned | Overlap (VC_203/VC_211)        | Ref |
| MF775687 | Unassigned | Unassigned | Unassigned | Overlap (VC_203/VC_211)        | Ref |
| MF775688 | Unassigned | Unassigned | Unassigned | Overlap (VC_203/VC_211)        | Ref |
| MF775689 | Unassigned | Unassigned | Unassigned | Overlap (VC_203/VC_211)        | Ref |
| MF775690 | Unassigned | Unassigned | Unassigned | Overlap (VC_203/VC_211)        | Ref |
| MF775691 | Unassigned | Unassigned | Unassigned | Overlap (VC_203/VC_211)        | Ref |
| MF775692 | Unassigned | Unassigned | Unassigned | Overlap (VC_203/VC_211)        | Ref |
| MF775693 | Unassigned | Unassigned | Unassigned | Overlap (VC_203/VC_211)        | Ref |
| MF775694 | Unassigned | Unassigned | Unassigned | Overlap (VC_203/VC_211)        | Ref |
| MF775695 | Unassigned | Unassigned | Unassigned | Overlap (VC_203/VC_211)        | Ref |
| MF775696 | Unassigned | Unassigned | Unassigned | Overlap (VC_203/VC_211)        | Ref |
| MF775697 | Unassigned | Unassigned | Unassigned | Overlap (VC_203/VC_211)        | Ref |
| MF775698 | Unassigned | Unassigned | Unassigned | Overlap (VC_203/VC_211)        | Ref |
| MF775699 | Unassigned | Unassigned | Unassigned | Overlap (VC_203/VC_211)        | Ref |
| MF775700 | Unassigned | Unassigned | Unassigned | Overlap (VC_203/VC_211)        | Ref |
| MF775701 | Unassigned | Unassigned | Unassigned | Overlap (VC_203/VC_211)        | Ref |
| MF775702 | Unassigned | Unassigned | Unassigned | Overlap (VC_203/VC_211)        | Ref |
| MF893271 | Unassigned | Unassigned | Unassigned | Outlier                        | Ref |
| MF893341 | Unassigned | Unassigned | Unassigned | Outlier                        | Ref |
| MP919498 | Unassigned | Unassigned | Unassigned | Outlier                        | Ref |
| MP919502 | Unassigned | Unassigned | Unassigned | Overlap (VC_524/VC_546)        | Ref |
| MP919518 | Unassigned | Unassigned | Unassigned | Overlap (VC_238/VC_240)        | Ref |
| MP939898 | Unassigned | Unassigned | Unassigned | Outlier                        | Ref |
| MP957259 | Unassigned | Unassigned | Unassigned | Overlap (VC_286/VC_290/VC_491) | Ref |
| MP959998 | Unassigned | Unassigned | Unassigned | Outlier                        | Ref |
| MP975637 | Unassigned | Unassigned | Unassigned | Overlap (VC_872/VC_873)        | Ref |
| MP975721 | Unassigned | Unassigned | Unassigned | Outlier                        | Ref |
| MP979559 | Unassigned | Unassigned | Unassigned | Overlap (VC_481/VC_482/VC_484) | Ref |
| MP979564 | Unassigned | Unassigned | Unassigned | Outlier                        | Ref |
| MP988720 | Unassigned | Unassigned | Unassigned | Outlier                        | Ref |
| MG009575 | Unassigned | Unassigned | Unassigned | Outlier                        | Ref |
| MG018926 | Unassigned | Unassigned | Unassigned | Outlier                        | Ref |
| MG030347 | Unassigned | Unassigned | Unassigned | Overlap (VC_194/VC_195)        | Ref |
| MG065637 | Unassigned | Unassigned | Unassigned | Outlier                        | Ref |
| MG065638 | Unassigned | Unassigned | Unassigned | Outlier                        | Ref |



|          |            |            |            |                                           |     |
|----------|------------|------------|------------|-------------------------------------------|-----|
| MG065652 | Unassigned | Unassigned | Unassigned | Outlier                                   | Ref |
| MG065668 | Unassigned | Unassigned | Unassigned | Outlier                                   | Ref |
| MG065676 | Unassigned | Unassigned | Unassigned | Outlier                                   | Ref |
| MG065684 | Unassigned | Unassigned | Unassigned | Outlier                                   | Ref |
| MG065685 | Unassigned | Unassigned | Unassigned | Outlier                                   | Ref |
| MG159787 | Unassigned | Unassigned | Unassigned | Outlier                                   | Ref |
| MG197996 | Unassigned | Unassigned | Unassigned | Outlier                                   | Ref |
| MG214783 | Unassigned | Unassigned | Unassigned | Outlier                                   | Ref |
| MG250483 | Unassigned | Unassigned | Unassigned | Overlap (VC_444/VC_580)                   | Ref |
| MG250484 | Unassigned | Unassigned | Unassigned | Overlap (VC_286/VC_290/VC_491)            | Ref |
| MG251388 | Unassigned | Unassigned | Unassigned | Outlier                                   | Ref |
| MG366114 | Unassigned | Unassigned | Unassigned | Outlier                                   | Ref |
| MG450654 | Unassigned | Unassigned | Unassigned | Outlier                                   | Ref |
| MG575420 | Unassigned | Unassigned | Unassigned | Overlap (VC_932/VC_1050)                  | Ref |
| MG584725 | Unassigned | Unassigned | Unassigned | Outlier                                   | Ref |
| MG592413 | Unassigned | Unassigned | Unassigned | Outlier                                   | Ref |
| MG592433 | Unassigned | Unassigned | Unassigned | Outlier                                   | Ref |
| MG592452 | Unassigned | Unassigned | Unassigned | Overlap (VC_644/VC_946)                   | Ref |
| MG592491 | Unassigned | Unassigned | Unassigned | Overlap (VC_615/VC_754)                   | Ref |
| MG592498 | Unassigned | Unassigned | Unassigned | Outlier                                   | Ref |
| MG592515 | Unassigned | Unassigned | Unassigned | Outlier                                   | Ref |
| MG592537 | Unassigned | Unassigned | Unassigned | Outlier                                   | Ref |
| MG592548 | Unassigned | Unassigned | Unassigned | Outlier                                   | Ref |
| MG592574 | Unassigned | Unassigned | Unassigned | Outlier                                   | Ref |
| MG592575 | Unassigned | Unassigned | Unassigned | Overlap (VC_45/VC_47)                     | Ref |
| MG592577 | Unassigned | Unassigned | Unassigned | Overlap (VC_615/VC_754)                   | Ref |
| MG592580 | Unassigned | Unassigned | Unassigned | Overlap (VC_644/VC_946)                   | Ref |
| MG592615 | Unassigned | Unassigned | Unassigned | Outlier                                   | Ref |
| MG592643 | Unassigned | Unassigned | Unassigned | Outlier                                   | Ref |
| MG592667 | Unassigned | Unassigned | Unassigned | Overlap (VC_615/VC_754)                   | Ref |
| MG593801 | Unassigned | Unassigned | Unassigned | Outlier                                   | Ref |
| MG603697 | Unassigned | Unassigned | Unassigned | Outlier                                   | Ref |
| MG641181 | Unassigned | Unassigned | Unassigned | Singleton                                 | Ref |
| MG641182 | Unassigned | Unassigned | Unassigned | Outlier                                   | Ref |
| MG641187 | Unassigned | Unassigned | Unassigned | Overlap (VC_1078/VC_1079)                 | Ref |
| MG641885 | Unassigned | Unassigned | Unassigned | Overlap (VC_463/VC_609)                   | Ref |
| MG652450 | Unassigned | Unassigned | Unassigned | Overlap (VC_71/VC_72)                     | Ref |
| MG696115 | Unassigned | Unassigned | Unassigned | Outlier                                   | Ref |
| MG710484 | Unassigned | Unassigned | Unassigned | Overlap (VC_705/VC_747)                   | Ref |
| MG711516 | Unassigned | Unassigned | Unassigned | Overlap (VC_481/VC_482/VC_484)            | Ref |
| MG720308 | Unassigned | Unassigned | Unassigned | Overlap (VC_442/VC_443)                   | Ref |
| MG727697 | Unassigned | Unassigned | Unassigned | Outlier                                   | Ref |
| MG732930 | Unassigned | Unassigned | Unassigned | Outlier                                   | Ref |
| MG746602 | Unassigned | Unassigned | Unassigned | Overlap (VC_491/VC_492)                   | Ref |
| MG752970 | Unassigned | Unassigned | Unassigned | Outlier                                   | Ref |
| MG770213 | Unassigned | Unassigned | Unassigned | Overlap (VC_521/VC_548)                   | Ref |
| MG775259 | Unassigned | Unassigned | Unassigned | Outlier                                   | Ref |
| MG775261 | Unassigned | Unassigned | Unassigned | Overlap (VC_71/VC_74)                     | Ref |
| MG779474 | Unassigned | Unassigned | Unassigned | Overlap (VC_203/VC_206)                   | Ref |
| MG835450 | Unassigned | Unassigned | Unassigned | Singleton                                 | Ref |
| MG835858 | Unassigned | Unassigned | Unassigned | Overlap (VC_593/VC_597)                   | Ref |
| MG839019 | Unassigned | Unassigned | Unassigned | Overlap (VC_1241/VC_1242)                 | Ref |
| MG839024 | Unassigned | Unassigned | Unassigned | Overlap (VC_1241/VC_1242)                 | Ref |
| MG839025 | Unassigned | Unassigned | Unassigned | Overlap (VC_1241/VC_1242)                 | Ref |
| MG839030 | Unassigned | Unassigned | Unassigned | Overlap (VC_1241/VC_1242)                 | Ref |
| MG845393 | Unassigned | Unassigned | Unassigned | Overlap (VC_526/VC_554)                   | Ref |
| MG845683 | Unassigned | Unassigned | Unassigned | Outlier                                   | Ref |
| MG883711 | Unassigned | Unassigned | Unassigned | Overlap (VC_1106/VC_1107)                 | Ref |
| MG883721 | Unassigned | Unassigned | Unassigned | Singleton                                 | Ref |
| MG945132 | Unassigned | Unassigned | Unassigned | Overlap (VC_1054/VC_1055)                 | Ref |
| MG945133 | Unassigned | Unassigned | Unassigned | Overlap (VC_1255/VC_1256)                 | Ref |
| MG945134 | Unassigned | Unassigned | Unassigned | Overlap (VC_1106/VC_1107)                 | Ref |
| MG945137 | Unassigned | Unassigned | Unassigned | Singleton                                 | Ref |
| MG945155 | Unassigned | Unassigned | Unassigned | Outlier                                   | Ref |
| MG945156 | Unassigned | Unassigned | Unassigned | Overlap (VC_1056/VC_1057/VC_1061)         | Ref |
| MG945180 | Unassigned | Unassigned | Unassigned | Singleton                                 | Ref |
| MG945182 | Unassigned | Unassigned | Unassigned | Singleton                                 | Ref |
| MG945184 | Unassigned | Unassigned | Unassigned | Singleton                                 | Ref |
| MG945187 | Unassigned | Unassigned | Unassigned | Overlap (VC_1265/VC_1266)                 | Ref |
| MG945191 | Unassigned | Unassigned | Unassigned | Outlier                                   | Ref |
| MG945216 | Unassigned | Unassigned | Unassigned | Singleton                                 | Ref |
| MG945239 | Unassigned | Unassigned | Unassigned | Outlier                                   | Ref |
| MG945240 | Unassigned | Unassigned | Unassigned | Outlier                                   | Ref |
| MG945253 | Unassigned | Unassigned | Unassigned | Outlier                                   | Ref |
| MG945259 | Unassigned | Unassigned | Unassigned | Singleton                                 | Ref |
| MG945262 | Unassigned | Unassigned | Unassigned | Singleton                                 | Ref |
| MG945264 | Unassigned | Unassigned | Unassigned | Outlier                                   | Ref |
| MG945265 | Unassigned | Unassigned | Unassigned | Overlap (VC_1054/VC_1056/VC_1057/VC_1061) | Ref |
| MG945266 | Unassigned | Unassigned | Unassigned | Singleton                                 | Ref |
| MG945277 | Unassigned | Unassigned | Unassigned | Singleton                                 | Ref |
| MG945281 | Unassigned | Unassigned | Unassigned | Outlier                                   | Ref |



|          |            |            |            |                                           |     |
|----------|------------|------------|------------|-------------------------------------------|-----|
| MG945283 | Unassigned | Unassigned | Unassigned | Overlap (VC_1130/VC_1132/VC_1249)         | Ref |
| MG945306 | Unassigned | Unassigned | Unassigned | Outlier                                   | Ref |
| MG945307 | Unassigned | Unassigned | Unassigned | Outlier                                   | Ref |
| MG945308 | Unassigned | Unassigned | Unassigned | Singleton                                 | Ref |
| MG945310 | Unassigned | Unassigned | Unassigned | Overlap (VC_1126/VC_1131)                 | Ref |
| MG945311 | Unassigned | Unassigned | Unassigned | Overlap (VC_1126/VC_1131)                 | Ref |
| MG945312 | Unassigned | Unassigned | Unassigned | Overlap (VC_1126/VC_1131)                 | Ref |
| MG945313 | Unassigned | Unassigned | Unassigned | Overlap (VC_199/VC_398)                   | Ref |
| MG945315 | Unassigned | Unassigned | Unassigned | Outlier                                   | Ref |
| MG945317 | Unassigned | Unassigned | Unassigned | Outlier                                   | Ref |
| MG945321 | Unassigned | Unassigned | Unassigned | Overlap (VC_1265/VC_1266)                 | Ref |
| MG945322 | Unassigned | Unassigned | Unassigned | Overlap (VC_199/VC_398)                   | Ref |
| MG945326 | Unassigned | Unassigned | Unassigned | Singleton                                 | Ref |
| MG945340 | Unassigned | Unassigned | Unassigned | Outlier                                   | Ref |
| MG945342 | Unassigned | Unassigned | Unassigned | Outlier                                   | Ref |
| MG945353 | Unassigned | Unassigned | Unassigned | Overlap (VC_1265/VC_1266)                 | Ref |
| MG945356 | Unassigned | Unassigned | Unassigned | Outlier                                   | Ref |
| MG945358 | Unassigned | Unassigned | Unassigned | Singleton                                 | Ref |
| MG945359 | Unassigned | Unassigned | Unassigned | Overlap (VC_1106/VC_1108)                 | Ref |
| MG945399 | Unassigned | Unassigned | Unassigned | Overlap (VC_1106/VC_1107)                 | Ref |
| MG945400 | Unassigned | Unassigned | Unassigned | Singleton                                 | Ref |
| MG945406 | Unassigned | Unassigned | Unassigned | Outlier                                   | Ref |
| MG945422 | Unassigned | Unassigned | Unassigned | Singleton                                 | Ref |
| MG945423 | Unassigned | Unassigned | Unassigned | Outlier                                   | Ref |
| MG945428 | Unassigned | Unassigned | Unassigned | Outlier                                   | Ref |
| MG945431 | Unassigned | Unassigned | Unassigned | Overlap (VC_1106/VC_1108)                 | Ref |
| MG945436 | Unassigned | Unassigned | Unassigned | Singleton                                 | Ref |
| MG945440 | Unassigned | Unassigned | Unassigned | Outlier                                   | Ref |
| MG945442 | Unassigned | Unassigned | Unassigned | Outlier                                   | Ref |
| MG945443 | Unassigned | Unassigned | Unassigned | Singleton                                 | Ref |
| MG945446 | Unassigned | Unassigned | Unassigned | Outlier                                   | Ref |
| MG945450 | Unassigned | Unassigned | Unassigned | Overlap (VC_1056/VC_1057/VC_1061)         | Ref |
| MG945451 | Unassigned | Unassigned | Unassigned | Singleton                                 | Ref |
| MG945454 | Unassigned | Unassigned | Unassigned | Outlier                                   | Ref |
| MG945466 | Unassigned | Unassigned | Unassigned | Outlier                                   | Ref |
| MG945471 | Unassigned | Unassigned | Unassigned | Singleton                                 | Ref |
| MG945474 | Unassigned | Unassigned | Unassigned | Overlap (VC_199/VC_399/VC_400)            | Ref |
| MG945479 | Unassigned | Unassigned | Unassigned | Overlap (VC_1055/VC_1056/VC_1057)         | Ref |
| MG945484 | Unassigned | Unassigned | Unassigned | Outlier                                   | Ref |
| MG945491 | Unassigned | Unassigned | Unassigned | Overlap (VC_1055/VC_1056/VC_1057)         | Ref |
| MG945493 | Unassigned | Unassigned | Unassigned | Outlier                                   | Ref |
| MG945497 | Unassigned | Unassigned | Unassigned | Outlier                                   | Ref |
| MG945503 | Unassigned | Unassigned | Unassigned | Outlier                                   | Ref |
| MG945510 | Unassigned | Unassigned | Unassigned | Singleton                                 | Ref |
| MG945513 | Unassigned | Unassigned | Unassigned | Outlier                                   | Ref |
| MG945516 | Unassigned | Unassigned | Unassigned | Singleton                                 | Ref |
| MG945521 | Unassigned | Unassigned | Unassigned | Singleton                                 | Ref |
| MG945522 | Unassigned | Unassigned | Unassigned | Overlap (VC_1255/VC_1256)                 | Ref |
| MG945527 | Unassigned | Unassigned | Unassigned | Singleton                                 | Ref |
| MG945528 | Unassigned | Unassigned | Unassigned | Overlap (VC_1055/VC_1057)                 | Ref |
| MG945530 | Unassigned | Unassigned | Unassigned | Outlier                                   | Ref |
| MG945531 | Unassigned | Unassigned | Unassigned | Outlier                                   | Ref |
| MG945532 | Unassigned | Unassigned | Unassigned | Singleton                                 | Ref |
| MG945535 | Unassigned | Unassigned | Unassigned | Outlier                                   | Ref |
| MG945536 | Unassigned | Unassigned | Unassigned | Outlier                                   | Ref |
| MG945537 | Unassigned | Unassigned | Unassigned | Singleton                                 | Ref |
| MG945543 | Unassigned | Unassigned | Unassigned | Overlap (VC_1130/VC_1132/VC_1249)         | Ref |
| MG945545 | Unassigned | Unassigned | Unassigned | Overlap (VC_1130/VC_1135)                 | Ref |
| MG945547 | Unassigned | Unassigned | Unassigned | Singleton                                 | Ref |
| MG945552 | Unassigned | Unassigned | Unassigned | Overlap (VC_1114/VC_1136/VC_1318)         | Ref |
| MG945553 | Unassigned | Unassigned | Unassigned | Outlier                                   | Ref |
| MG945555 | Unassigned | Unassigned | Unassigned | Singleton                                 | Ref |
| MG945558 | Unassigned | Unassigned | Unassigned | Overlap (VC_1192/VC_1196)                 | Ref |
| MG945577 | Unassigned | Unassigned | Unassigned | Overlap (VC_1120/VC_1121)                 | Ref |
| MG945581 | Unassigned | Unassigned | Unassigned | Overlap (VC_1192/VC_1196)                 | Ref |
| MG945583 | Unassigned | Unassigned | Unassigned | Overlap (VC_1055/VC_1056/VC_1057)         | Ref |
| MG945588 | Unassigned | Unassigned | Unassigned | Outlier                                   | Ref |
| MG945590 | Unassigned | Unassigned | Unassigned | Overlap (VC_1318/VC_1319)                 | Ref |
| MG945592 | Unassigned | Unassigned | Unassigned | Outlier                                   | Ref |
| MG945593 | Unassigned | Unassigned | Unassigned | Outlier                                   | Ref |
| MG945595 | Unassigned | Unassigned | Unassigned | Singleton                                 | Ref |
| MG945598 | Unassigned | Unassigned | Unassigned | Outlier                                   | Ref |
| MG945599 | Unassigned | Unassigned | Unassigned | Overlap (VC_1056/VC_1057/VC_1061)         | Ref |
| MG945600 | Unassigned | Unassigned | Unassigned | Outlier                                   | Ref |
| MG945601 | Unassigned | Unassigned | Unassigned | Overlap (VC_1056/VC_1057/VC_1061/VC_1142) | Ref |
| MG945603 | Unassigned | Unassigned | Unassigned | Overlap (VC_1056/VC_1057)                 | Ref |
| MG945604 | Unassigned | Unassigned | Unassigned | Singleton                                 | Ref |
| MG945606 | Unassigned | Unassigned | Unassigned | Outlier                                   | Ref |
| MG945607 | Unassigned | Unassigned | Unassigned | Overlap (VC_1130/VC_1135)                 | Ref |
| MG945608 | Unassigned | Unassigned | Unassigned | Singleton                                 | Ref |
| MG945610 | Unassigned | Unassigned | Unassigned | Singleton                                 | Ref |



|          |            |            |            |                                           |     |
|----------|------------|------------|------------|-------------------------------------------|-----|
| MG945624 | Unassigned | Unassigned | Unassigned | Outlier                                   | Ref |
| MG945626 | Unassigned | Unassigned | Unassigned | Outlier                                   | Ref |
| MG945627 | Unassigned | Unassigned | Unassigned | Outlier                                   | Ref |
| MG945630 | Unassigned | Unassigned | Unassigned | Singleton                                 | Ref |
| MG945636 | Unassigned | Unassigned | Unassigned | Singleton                                 | Ref |
| MG945638 | Unassigned | Unassigned | Unassigned | Singleton                                 | Ref |
| MG945666 | Unassigned | Unassigned | Unassigned | Outlier                                   | Ref |
| MG945672 | Unassigned | Unassigned | Unassigned | Overlap (VC_1126/VC_1131)                 | Ref |
| MG945675 | Unassigned | Unassigned | Unassigned | Outlier                                   | Ref |
| MG945679 | Unassigned | Unassigned | Unassigned | Overlap (VC_1054/VC_1055)                 | Ref |
| MG945684 | Unassigned | Unassigned | Unassigned | Outlier                                   | Ref |
| MG945688 | Unassigned | Unassigned | Unassigned | Outlier                                   | Ref |
| MG945695 | Unassigned | Unassigned | Unassigned | Singleton                                 | Ref |
| MG945700 | Unassigned | Unassigned | Unassigned | Overlap (VC_1106/VC_1108)                 | Ref |
| MG945701 | Unassigned | Unassigned | Unassigned | Overlap (VC_1054/VC_1055)                 | Ref |
| MG945707 | Unassigned | Unassigned | Unassigned | Overlap (VC_1106/VC_1107)                 | Ref |
| MG945709 | Unassigned | Unassigned | Unassigned | Singleton                                 | Ref |
| MG945711 | Unassigned | Unassigned | Unassigned | Overlap (VC_1055/VC_1057)                 | Ref |
| MG945714 | Unassigned | Unassigned | Unassigned | Singleton                                 | Ref |
| MG945715 | Unassigned | Unassigned | Unassigned | Outlier                                   | Ref |
| MG945720 | Unassigned | Unassigned | Unassigned | Overlap (VC_1114/VC_1136/VC_1318/VC_1319) | Ref |
| MG945722 | Unassigned | Unassigned | Unassigned | Outlier                                   | Ref |
| MG945732 | Unassigned | Unassigned | Unassigned | Overlap (VC_1255/VC_1256)                 | Ref |
| MG945737 | Unassigned | Unassigned | Unassigned | Outlier                                   | Ref |
| MG945749 | Unassigned | Unassigned | Unassigned | Outlier                                   | Ref |
| MG945762 | Unassigned | Unassigned | Unassigned | Singleton                                 | Ref |
| MG945763 | Unassigned | Unassigned | Unassigned | Singleton                                 | Ref |
| MG945772 | Unassigned | Unassigned | Unassigned | Singleton                                 | Ref |
| MG945773 | Unassigned | Unassigned | Unassigned | Singleton                                 | Ref |
| MG945777 | Unassigned | Unassigned | Unassigned | Overlap (VC_1056/VC_1057/VC_1061/VC_1142) | Ref |
| MG945779 | Unassigned | Unassigned | Unassigned | Singleton                                 | Ref |
| MG945833 | Unassigned | Unassigned | Unassigned | Singleton                                 | Ref |
| MG945834 | Unassigned | Unassigned | Unassigned | Overlap (VC_406/VC_1250)                  | Ref |
| MG945841 | Unassigned | Unassigned | Unassigned | Singleton                                 | Ref |
| MG945844 | Unassigned | Unassigned | Unassigned | Singleton                                 | Ref |
| MG945847 | Unassigned | Unassigned | Unassigned | Outlier                                   | Ref |
| MG945851 | Unassigned | Unassigned | Unassigned | Singleton                                 | Ref |
| MG945854 | Unassigned | Unassigned | Unassigned | Overlap (VC_1078/VC_1079)                 | Ref |
| MG945856 | Unassigned | Unassigned | Unassigned | Overlap                                   | Ref |
| MG945860 | Unassigned | Unassigned | Unassigned | Outlier                                   | Ref |
| MG945861 | Unassigned | Unassigned | Unassigned | Outlier                                   | Ref |
| MG945863 | Unassigned | Unassigned | Unassigned | Overlap (VC_1078/VC_1082)                 | Ref |
| MG945865 | Unassigned | Unassigned | Unassigned | Overlap (VC_1078/VC_1079)                 | Ref |
| MG945868 | Unassigned | Unassigned | Unassigned | Singleton                                 | Ref |
| MG948468 | Unassigned | Unassigned | Unassigned | Singleton                                 | Ref |
| MG962366 | Unassigned | Unassigned | Unassigned | Outlier                                   | Ref |
| MG969407 | Unassigned | Unassigned | Unassigned | Overlap (VC_560/VC_561/VC_562/VC_563)     | Ref |
| MG969413 | Unassigned | Unassigned | Unassigned | Outlier                                   | Ref |
| MG969414 | Unassigned | Unassigned | Unassigned | Outlier                                   | Ref |
| MG969427 | Unassigned | Unassigned | Unassigned | Outlier                                   | Ref |
| MG973030 | Unassigned | Unassigned | Unassigned | Outlier                                   | Ref |
| MG986485 | Unassigned | Unassigned | Unassigned | Outlier                                   | Ref |
| MG999954 | Unassigned | Unassigned | Unassigned | Overlap (VC_286/VC_290/VC_491)            | Ref |
| MH001449 | Unassigned | Unassigned | Unassigned | Outlier                                   | Ref |
| MH020242 | Unassigned | Unassigned | Unassigned | Overlap (VC_521/VC_550)                   | Ref |
| MH020243 | Unassigned | Unassigned | Unassigned | Overlap (VC_521/VC_550)                   | Ref |
| MH020245 | Unassigned | Unassigned | Unassigned | Overlap (VC_238/VC_240)                   | Ref |
| MH028956 | Unassigned | Unassigned | Unassigned | Outlier                                   | Ref |
| MH045555 | Unassigned | Unassigned | Unassigned | Overlap (VC_1241/VC_1242)                 | Ref |
| MH045556 | Unassigned | Unassigned | Unassigned | Outlier                                   | Ref |
| MH045559 | Unassigned | Unassigned | Unassigned | Overlap (VC_1241/VC_1242)                 | Ref |
| MH047631 | Unassigned | Unassigned | Unassigned | Outlier                                   | Ref |
| MH051248 | Unassigned | Unassigned | Unassigned | Overlap (VC_521/VC_549)                   | Ref |
| MH059633 | Unassigned | Unassigned | Unassigned | Overlap (VC_538/VC_619)                   | Ref |
| MH059634 | Unassigned | Unassigned | Unassigned | Outlier                                   | Ref |
| MH059637 | Unassigned | Unassigned | Unassigned | Outlier                                   | Ref |
| MH077585 | Unassigned | Unassigned | Unassigned | Outlier                                   | Ref |
| MH078572 | Unassigned | Unassigned | Unassigned | Outlier                                   | Ref |
| MH105080 | Unassigned | Unassigned | Unassigned | Singleton                                 | Ref |
| MH107246 | Unassigned | Unassigned | Unassigned | Overlap (VC_435/VC_656)                   | Ref |
| MH155867 | Unassigned | Unassigned | Unassigned | Overlap (VC_526/VC_554)                   | Ref |
| MH155869 | Unassigned | Unassigned | Unassigned | Overlap (VC_872/VC_873)                   | Ref |
| MH155872 | Unassigned | Unassigned | Unassigned | Overlap (VC_872/VC_873)                   | Ref |
| MH155878 | Unassigned | Unassigned | Unassigned | Overlap (VC_872/VC_873)                   | Ref |
| MH191395 | Unassigned | Unassigned | Unassigned | Overlap (VC_538/VC_619)                   | Ref |
| MH230879 | Unassigned | Unassigned | Unassigned | Outlier                                   | Ref |
| MH238466 | Unassigned | Unassigned | Unassigned | Outlier                                   | Ref |
| MH238467 | Unassigned | Unassigned | Unassigned | Outlier                                   | Ref |
| MH319722 | Unassigned | Unassigned | Unassigned | Singleton                                 | Ref |
| MH319723 | Unassigned | Unassigned | Unassigned | Outlier                                   | Ref |
| MH319724 | Unassigned | Unassigned | Unassigned | Outlier                                   | Ref |



|          |            |            |            |                                        |     |
|----------|------------|------------|------------|----------------------------------------|-----|
| MH319725 | Unassigned | Unassigned | Unassigned | Singleton                              | Ref |
| MH319732 | Unassigned | Unassigned | Unassigned | Outlier                                | Ref |
| MH319734 | Unassigned | Unassigned | Unassigned | Overlap (VC_440/VC_659)                | Ref |
| MH319738 | Unassigned | Unassigned | Unassigned | Outlier                                | Ref |
| MH319741 | Unassigned | Unassigned | Unassigned | Outlier                                | Ref |
| MH319743 | Unassigned | Unassigned | Unassigned | Outlier                                | Ref |
| MH319745 | Unassigned | Unassigned | Unassigned | Outlier                                | Ref |
| MH319751 | Unassigned | Unassigned | Unassigned | Overlap (VC_440/VC_659)                | Ref |
| MH319752 | Unassigned | Unassigned | Unassigned | Outlier                                | Ref |
| MH319755 | Unassigned | Unassigned | Unassigned | Overlap (VC_440/VC_659)                | Ref |
| MH319760 | Unassigned | Unassigned | Unassigned | Singleton                              | Ref |
| MH319764 | Unassigned | Unassigned | Unassigned | Outlier                                | Ref |
| MH319765 | Unassigned | Unassigned | Unassigned | Outlier                                | Ref |
| MH327485 | Unassigned | Unassigned | Unassigned | Outlier                                | Ref |
| MH327486 | Unassigned | Unassigned | Unassigned | Outlier                                | Ref |
| MH327490 | Unassigned | Unassigned | Unassigned | Outlier                                | Ref |
| MH327491 | Unassigned | Unassigned | Unassigned | Outlier                                | Ref |
| MH362766 | Unassigned | Unassigned | Unassigned | Overlap (VC_750/VC_751)                | Ref |
| MH370364 | Unassigned | Unassigned | Unassigned | Outlier                                | Ref |
| MH370382 | Unassigned | Unassigned | Unassigned | Outlier                                | Ref |
| MH370383 | Unassigned | Unassigned | Unassigned | Outlier                                | Ref |
| MH382836 | Unassigned | Unassigned | Unassigned | Outlier                                | Ref |
| MH399770 | Unassigned | Unassigned | Unassigned | Overlap (VC_238/VC_240)                | Ref |
| MH431930 | Unassigned | Unassigned | Unassigned | Outlier                                | Ref |
| MH443101 | Unassigned | Unassigned | Unassigned | Overlap (VC_32/VC_33)                  | Ref |
| MH445500 | Unassigned | Unassigned | Unassigned | Outlier                                | Ref |
| MH450123 | Unassigned | Unassigned | Unassigned | Overlap (VC_1034/VC_1035/VC_1039)      | Ref |
| MH454081 | Unassigned | Unassigned | Unassigned | Outlier                                | Ref |
| MH458951 | Unassigned | Unassigned | Unassigned | Outlier                                | Ref |
| MH479922 | Unassigned | Unassigned | Unassigned | Overlap (VC_1241/VC_1242)              | Ref |
| MH509441 | Unassigned | Unassigned | Unassigned | Outlier                                | Ref |
| MH509442 | Unassigned | Unassigned | Unassigned | Outlier                                | Ref |
| MH517022 | Unassigned | Unassigned | Unassigned | Outlier                                | Ref |
| MH518298 | Unassigned | Unassigned | Unassigned | Outlier                                | Ref |
| MH536826 | Unassigned | Unassigned | Unassigned | Outlier                                | Ref |
| MH538296 | Unassigned | Unassigned | Unassigned | Outlier                                | Ref |
| MH553517 | Unassigned | Unassigned | Unassigned | Outlier                                | Ref |
| MH572270 | Unassigned | Unassigned | Unassigned | Overlap (VC_199/VC_398)                | Ref |
| MH572271 | Unassigned | Unassigned | Unassigned | Overlap (VC_406/VC_1250)               | Ref |
| MH572272 | Unassigned | Unassigned | Unassigned | Overlap (VC_406/VC_1250)               | Ref |
| MH572273 | Unassigned | Unassigned | Unassigned | Overlap (VC_406/VC_1250)               | Ref |
| MH572278 | Unassigned | Unassigned | Unassigned | Outlier                                | Ref |
| MH572281 | Unassigned | Unassigned | Unassigned | Overlap (VC_199/VC_399/VC_400)         | Ref |
| MH572289 | Unassigned | Unassigned | Unassigned | Overlap (VC_406/VC_999)                | Ref |
| MH572297 | Unassigned | Unassigned | Unassigned | Overlap (VC_400/VC_994/VC_1084)        | Ref |
| MH572298 | Unassigned | Unassigned | Unassigned | Outlier                                | Ref |
| MH572304 | Unassigned | Unassigned | Unassigned | Outlier                                | Ref |
| MH572322 | Unassigned | Unassigned | Unassigned | Overlap (VC_199/VC_399)                | Ref |
| MH572323 | Unassigned | Unassigned | Unassigned | Overlap (VC_199/VC_399)                | Ref |
| MH572324 | Unassigned | Unassigned | Unassigned | Overlap (VC_199/VC_399)                | Ref |
| MH572327 | Unassigned | Unassigned | Unassigned | Overlap (VC_199/VC_399)                | Ref |
| MH572331 | Unassigned | Unassigned | Unassigned | Outlier                                | Ref |
| MH572332 | Unassigned | Unassigned | Unassigned | Overlap (VC_199/VC_399)                | Ref |
| MH572333 | Unassigned | Unassigned | Unassigned | Overlap (VC_398/VC_403)                | Ref |
| MH572335 | Unassigned | Unassigned | Unassigned | Overlap (VC_199/VC_399)                | Ref |
| MH572337 | Unassigned | Unassigned | Unassigned | Overlap (VC_199/VC_399)                | Ref |
| MH572338 | Unassigned | Unassigned | Unassigned | Overlap (VC_400/VC_994/VC_1084)        | Ref |
| MH572339 | Unassigned | Unassigned | Unassigned | Outlier                                | Ref |
| MH572344 | Unassigned | Unassigned | Unassigned | Outlier                                | Ref |
| MH572346 | Unassigned | Unassigned | Unassigned | Outlier                                | Ref |
| MH572350 | Unassigned | Unassigned | Unassigned | Overlap (VC_199/VC_399)                | Ref |
| MH572352 | Unassigned | Unassigned | Unassigned | Singleton                              | Ref |
| MH572356 | Unassigned | Unassigned | Unassigned | Outlier                                | Ref |
| MH572359 | Unassigned | Unassigned | Unassigned | Outlier                                | Ref |
| MH572363 | Unassigned | Unassigned | Unassigned | Outlier                                | Ref |
| MH572365 | Unassigned | Unassigned | Unassigned | Singleton                              | Ref |
| MH572370 | Unassigned | Unassigned | Unassigned | Overlap (VC_1066/VC_1335)              | Ref |
| MH572372 | Unassigned | Unassigned | Unassigned | Singleton                              | Ref |
| MH572381 | Unassigned | Unassigned | Unassigned | Outlier                                | Ref |
| MH572398 | Unassigned | Unassigned | Unassigned | Outlier                                | Ref |
| MH572413 | Unassigned | Unassigned | Unassigned | Overlap (VC_1079/VC_1081)              | Ref |
| MH572415 | Unassigned | Unassigned | Unassigned | Overlap (VC_1324/VC_1335)              | Ref |
| MH572416 | Unassigned | Unassigned | Unassigned | Overlap (VC_406/VC_1250)               | Ref |
| MH572417 | Unassigned | Unassigned | Unassigned | Outlier                                | Ref |
| MH572420 | Unassigned | Unassigned | Unassigned | Outlier                                | Ref |
| MH572421 | Unassigned | Unassigned | Unassigned | Overlap (VC_199/VC_399)                | Ref |
| MH572432 | Unassigned | Unassigned | Unassigned | Overlap (VC_400/VC_994/VC_999/VC_1084) | Ref |
| MH572433 | Unassigned | Unassigned | Unassigned | Overlap (VC_202/VC_401)                | Ref |
| MH572440 | Unassigned | Unassigned | Unassigned | Overlap (VC_199/VC_399)                | Ref |
| MH572442 | Unassigned | Unassigned | Unassigned | Overlap (VC_399/VC_400/VC_1084)        | Ref |
| MH572447 | Unassigned | Unassigned | Unassigned | Outlier                                | Ref |



|          |            |            |            |                                                |     |
|----------|------------|------------|------------|------------------------------------------------|-----|
| MH572449 | Unassigned | Unassigned | Unassigned | Overlap (VC_400/VC_994/VC_998/VC_1002/VC_1084) | Ref |
| MH572450 | Unassigned | Unassigned | Unassigned | Overlap (VC_399/VC_400/VC_1084)                | Ref |
| MH572456 | Unassigned | Unassigned | Unassigned | Singleton                                      | Ref |
| MH572464 | Unassigned | Unassigned | Unassigned | Overlap (VC_1066/VC_1335)                      | Ref |
| MH572474 | Unassigned | Unassigned | Unassigned | Overlap (VC_199/VC_399)                        | Ref |
| MH572476 | Unassigned | Unassigned | Unassigned | Overlap (VC_402/VC_406)                        | Ref |
| MH572477 | Unassigned | Unassigned | Unassigned | Overlap (VC_402/VC_406)                        | Ref |
| MH572478 | Unassigned | Unassigned | Unassigned | Overlap (VC_402/VC_406)                        | Ref |
| MH572481 | Unassigned | Unassigned | Unassigned | Outlier                                        | Ref |
| MH572488 | Unassigned | Unassigned | Unassigned | Outlier                                        | Ref |
| MH572501 | Unassigned | Unassigned | Unassigned | Overlap (VC_400/VC_994/VC_999/VC_1084)         | Ref |
| MH572502 | Unassigned | Unassigned | Unassigned | Outlier                                        | Ref |
| MH572523 | Unassigned | Unassigned | Unassigned | Overlap (VC_1324/VC_1335)                      | Ref |
| MH588546 | Unassigned | Unassigned | Unassigned | Overlap (VC_977/VC_980)                        | Ref |
| MH588547 | Unassigned | Unassigned | Unassigned | Overlap (VC_977/VC_980)                        | Ref |
| MH590590 | Unassigned | Unassigned | Unassigned | Overlap (VC_1241/VC_1242)                      | Ref |
| MH598799 | Unassigned | Unassigned | Unassigned | Overlap (VC_481/VC_482)                        | Ref |
| MH598801 | Unassigned | Unassigned | Unassigned | Overlap (VC_481/VC_482)                        | Ref |
| MH598806 | Unassigned | Unassigned | Unassigned | Overlap (VC_481/VC_482)                        | Ref |
| MH626557 | Unassigned | Unassigned | Unassigned | Singleton                                      | Ref |
| MH632120 | Unassigned | Unassigned | Unassigned | Outlier                                        | Ref |
| MH636380 | Unassigned | Unassigned | Unassigned | Singleton                                      | Ref |
| MH651173 | Unassigned | Unassigned | Unassigned | Overlap (VC_227/VC_941)                        | Ref |
| MH651187 | Unassigned | Unassigned | Unassigned | Outlier                                        | Ref |
| MH669005 | Unassigned | Unassigned | Unassigned | Overlap (VC_521/VC_548)                        | Ref |
| MH669009 | Unassigned | Unassigned | Unassigned | Overlap (VC_521/VC_548)                        | Ref |
| MH669010 | Unassigned | Unassigned | Unassigned | Overlap (VC_521/VC_548)                        | Ref |
| MH673671 | Unassigned | Unassigned | Unassigned | Singleton                                      | Ref |
| MH673672 | Unassigned | Unassigned | Unassigned | Outlier                                        | Ref |
| MH673673 | Unassigned | Unassigned | Unassigned | Outlier                                        | Ref |
| MH673674 | Unassigned | Unassigned | Unassigned | Outlier                                        | Ref |
| MH697589 | Unassigned | Unassigned | Unassigned | Overlap (VC_1164/VC_1243)                      | Ref |
| MH700630 | Unassigned | Unassigned | Unassigned | Outlier                                        | Ref |
| MH706966 | Unassigned | Unassigned | Unassigned | Outlier                                        | Ref |
| MH719082 | Unassigned | Unassigned | Unassigned | Outlier                                        | Ref |
| MH727545 | Unassigned | Unassigned | Unassigned | Overlap (VC_236/VC_238)                        | Ref |
| MH727550 | Unassigned | Unassigned | Unassigned | Outlier                                        | Ref |
| MH727556 | Unassigned | Unassigned | Unassigned | Overlap (VC_1172/VC_1173)                      | Ref |
| MH729379 | Unassigned | Unassigned | Unassigned | Outlier                                        | Ref |
| MH745368 | Unassigned | Unassigned | Unassigned | Outlier                                        | Ref |
| MH766655 | Unassigned | Unassigned | Unassigned | Outlier                                        | Ref |
| MH791401 | Unassigned | Unassigned | Unassigned | Overlap (VC_444/VC_580)                        | Ref |
| MH791407 | Unassigned | Unassigned | Unassigned | Overlap (VC_444/VC_580)                        | Ref |
| MH809532 | Unassigned | Unassigned | Unassigned | Overlap (VC_368/VC_369)                        | Ref |
| MH809533 | Unassigned | Unassigned | Unassigned | Overlap (VC_368/VC_369)                        | Ref |
| MH817999 | Unassigned | Unassigned | Unassigned | Overlap (VC_593/VC_597)                        | Ref |
| MH825708 | Unassigned | Unassigned | Unassigned | Overlap (VC_227/VC_941)                        | Ref |
| MH825712 | Unassigned | Unassigned | Unassigned | Outlier                                        | Ref |
| MH830339 | Unassigned | Unassigned | Unassigned | Overlap (VC_194/VC_195)                        | Ref |
| MH834601 | Unassigned | Unassigned | Unassigned | Overlap (VC_236/VC_238)                        | Ref |
| MH844558 | Unassigned | Unassigned | Unassigned | Outlier                                        | Ref |
| MH845412 | Unassigned | Unassigned | Unassigned | Overlap (VC_584/VC_586)                        | Ref |
| MH853355 | Unassigned | Unassigned | Unassigned | Overlap (VC_318/VC_320)                        | Ref |
| MH853356 | Unassigned | Unassigned | Unassigned | Overlap (VC_294/VC_320)                        | Ref |
| MH853357 | Unassigned | Unassigned | Unassigned | Overlap (VC_334/VC_416/VC_430/VC_777)          | Ref |
| MH853358 | Unassigned | Unassigned | Unassigned | Overlap (VC_318/VC_320)                        | Ref |
| MH884509 | Unassigned | Unassigned | Unassigned | Outlier                                        | Ref |
| MH884510 | Unassigned | Unassigned | Unassigned | Outlier                                        | Ref |
| MH884648 | Unassigned | Unassigned | Unassigned | Singleton                                      | Ref |
| MH898687 | Unassigned | Unassigned | Unassigned | Overlap (VC_367/VC_369)                        | Ref |
| MH920638 | Unassigned | Unassigned | Unassigned | Outlier                                        | Ref |
| MH925093 | Unassigned | Unassigned | Unassigned | Overlap (VC_615/VC_965)                        | Ref |
| MH972261 | Unassigned | Unassigned | Unassigned | Overlap (VC_97/VC_99)                          | Ref |
| MH972262 | Unassigned | Unassigned | Unassigned | Overlap (VC_97/VC_99)                          | Ref |
| MH972263 | Unassigned | Unassigned | Unassigned | Overlap (VC_97/VC_99)                          | Ref |
| MH992162 | Unassigned | Unassigned | Unassigned | Overlap (VC_1065/VC_1367)                      | Ref |
| MH992166 | Unassigned | Unassigned | Unassigned | Outlier                                        | Ref |
| MH992168 | Unassigned | Unassigned | Unassigned | Singleton                                      | Ref |
| MH992172 | Unassigned | Unassigned | Unassigned | Overlap (VC_1065/VC_1367)                      | Ref |
| MH992176 | Unassigned | Unassigned | Unassigned | Overlap (VC_1065/VC_1367)                      | Ref |
| MH992179 | Unassigned | Unassigned | Unassigned | Overlap (VC_1065/VC_1367)                      | Ref |
| MH992183 | Unassigned | Unassigned | Unassigned | Overlap (VC_327/VC_401)                        | Ref |
| MH992186 | Unassigned | Unassigned | Unassigned | Singleton                                      | Ref |
| MH992187 | Unassigned | Unassigned | Unassigned | Overlap (VC_1065/VC_1367)                      | Ref |
| MH992188 | Unassigned | Unassigned | Unassigned | Overlap (VC_199/VC_399/VC_400)                 | Ref |
| MH992190 | Unassigned | Unassigned | Unassigned | Overlap (VC_199/VC_401)                        | Ref |
| MH992198 | Unassigned | Unassigned | Unassigned | Overlap (VC_1065/VC_1367)                      | Ref |
| MH992201 | Unassigned | Unassigned | Unassigned | Outlier                                        | Ref |
| MH992203 | Unassigned | Unassigned | Unassigned | Overlap (VC_201/VC_398/VC_401)                 | Ref |
| MH992204 | Unassigned | Unassigned | Unassigned | Outlier                                        | Ref |
| MH992209 | Unassigned | Unassigned | Unassigned | Overlap (VC_199/VC_401)                        | Ref |



|          |            |            |            |                                   |     |
|----------|------------|------------|------------|-----------------------------------|-----|
| MH992212 | Unassigned | Unassigned | Unassigned | Overlap (VC_406/VC_1250)          | Ref |
| MH992221 | Unassigned | Unassigned | Unassigned | Overlap (VC_1066/VC_1335)         | Ref |
| MH992223 | Unassigned | Unassigned | Unassigned | Outlier                           | Ref |
| MK016493 | Unassigned | Unassigned | Unassigned | Outlier                           | Ref |
| MK016663 | Unassigned | Unassigned | Unassigned | Outlier                           | Ref |
| MK044828 | Unassigned | Unassigned | Unassigned | Overlap (VC_256/VC_414)           | Ref |
| MK044829 | Unassigned | Unassigned | Unassigned | Outlier                           | Ref |
| MK061406 | Unassigned | Unassigned | Unassigned | Overlap (VC_526/VC_554)           | Ref |
| MK061416 | Unassigned | Unassigned | Unassigned | Outlier                           | Ref |
| MK069556 | Unassigned | Unassigned | Unassigned | Outlier                           | Ref |
| MK075005 | Unassigned | Unassigned | Unassigned | Outlier                           | Ref |
| MK095605 | Unassigned | Unassigned | Unassigned | Outlier                           | Ref |
| MK095606 | Unassigned | Unassigned | Unassigned | Outlier                           | Ref |
| MK170447 | Unassigned | Unassigned | Unassigned | Singleton                         | Ref |
| MK203850 | Unassigned | Unassigned | Unassigned | Outlier                           | Ref |
| MK241539 | Unassigned | Unassigned | Unassigned | Outlier                           | Ref |
| MK249130 | Unassigned | Unassigned | Unassigned | Overlap (VC_1067/VC_1068)         | Ref |
| MK249134 | Unassigned | Unassigned | Unassigned | Overlap (VC_995/VC_1064)          | Ref |
| MK249136 | Unassigned | Unassigned | Unassigned | Overlap (VC_1067/VC_1068)         | Ref |
| MK249137 | Unassigned | Unassigned | Unassigned | Overlap (VC_1067/VC_1068)         | Ref |
| MK249140 | Unassigned | Unassigned | Unassigned | Overlap (VC_1067/VC_1068)         | Ref |
| MK249142 | Unassigned | Unassigned | Unassigned | Overlap (VC_1067/VC_1068)         | Ref |
| MK249145 | Unassigned | Unassigned | Unassigned | Overlap (VC_1067/VC_1068)         | Ref |
| MK249146 | Unassigned | Unassigned | Unassigned | Overlap (VC_1056/VC_1057/VC_1061) | Ref |
| MK249152 | Unassigned | Unassigned | Unassigned | Overlap (VC_1067/VC_1068)         | Ref |
| MK249157 | Unassigned | Unassigned | Unassigned | Outlier                           | Ref |
| MK249161 | Unassigned | Unassigned | Unassigned | Overlap (VC_1067/VC_1068)         | Ref |
| MK249164 | Unassigned | Unassigned | Unassigned | Overlap (VC_1067/VC_1068)         | Ref |
| MK249169 | Unassigned | Unassigned | Unassigned | Overlap (VC_1067/VC_1068)         | Ref |
| MK249170 | Unassigned | Unassigned | Unassigned | Overlap (VC_1067/VC_1068)         | Ref |
| MK249171 | Unassigned | Unassigned | Unassigned | Outlier                           | Ref |
| MK249172 | Unassigned | Unassigned | Unassigned | Overlap (VC_998/VC_1000/VC_1002)  | Ref |
| MK249173 | Unassigned | Unassigned | Unassigned | Overlap (VC_995/VC_996)           | Ref |
| MK249175 | Unassigned | Unassigned | Unassigned | Overlap (VC_1067/VC_1068)         | Ref |
| MK249177 | Unassigned | Unassigned | Unassigned | Overlap (VC_201/VC_398/VC_401)    | Ref |
| MK249182 | Unassigned | Unassigned | Unassigned | Overlap (VC_998/VC_1002)          | Ref |
| MK249183 | Unassigned | Unassigned | Unassigned | Outlier                           | Ref |
| MK249184 | Unassigned | Unassigned | Unassigned | Overlap (VC_1067/VC_1068)         | Ref |
| MK249186 | Unassigned | Unassigned | Unassigned | Overlap (VC_998/VC_1002)          | Ref |
| MK249187 | Unassigned | Unassigned | Unassigned | Overlap (VC_998/VC_1002)          | Ref |
| MK249193 | Unassigned | Unassigned | Unassigned | Singleton                         | Ref |
| MK249200 | Unassigned | Unassigned | Unassigned | Overlap (VC_398/VC_403)           | Ref |
| MK249206 | Unassigned | Unassigned | Unassigned | Overlap (VC_998/VC_1002)          | Ref |
| MK249209 | Unassigned | Unassigned | Unassigned | Outlier                           | Ref |
| MK249210 | Unassigned | Unassigned | Unassigned | Overlap (VC_995/VC_1064)          | Ref |
| MK249220 | Unassigned | Unassigned | Unassigned | Outlier                           | Ref |
| MK249224 | Unassigned | Unassigned | Unassigned | Overlap (VC_201/VC_398)           | Ref |
| MK249225 | Unassigned | Unassigned | Unassigned | Outlier                           | Ref |
| MK249226 | Unassigned | Unassigned | Unassigned | Overlap (VC_400/VC_994/VC_1084)   | Ref |
| MK249227 | Unassigned | Unassigned | Unassigned | Overlap (VC_201/VC_398)           | Ref |
| MK249230 | Unassigned | Unassigned | Unassigned | Overlap (VC_201/VC_398)           | Ref |
| MK249234 | Unassigned | Unassigned | Unassigned | Overlap (VC_1066/VC_1335)         | Ref |
| MK249871 | Unassigned | Unassigned | Unassigned | Outlier                           | Ref |
| MK279848 | Unassigned | Unassigned | Unassigned | Overlap (VC_526/VC_554)           | Ref |
| MK279899 | Unassigned | Unassigned | Unassigned | Overlap (VC_1035/VC_1039)         | Ref |
| MK290739 | Unassigned | Unassigned | Unassigned | Outlier                           | Ref |
| MK291442 | Unassigned | Unassigned | Unassigned | Outlier                           | Ref |
| MK291444 | Unassigned | Unassigned | Unassigned | Outlier                           | Ref |
| MK291445 | Unassigned | Unassigned | Unassigned | Outlier                           | Ref |
| MK295205 | Unassigned | Unassigned | Unassigned | Outlier                           | Ref |
| MK301438 | Unassigned | Unassigned | Unassigned | Overlap (VC_203/VC_206)           | Ref |
| MK301439 | Unassigned | Unassigned | Unassigned | Overlap (VC_203/VC_207)           | Ref |
| MK301440 | Unassigned | Unassigned | Unassigned | Overlap (VC_203/VC_206)           | Ref |
| MK301441 | Unassigned | Unassigned | Unassigned | Overlap (VC_203/VC_206)           | Ref |
| MK301608 | Unassigned | Unassigned | Unassigned | Outlier                           | Ref |
| MK305886 | Unassigned | Unassigned | Unassigned | Overlap (VC_521/VC_548)           | Ref |
| MK310226 | Unassigned | Unassigned | Unassigned | Outlier                           | Ref |
| MK327938 | Unassigned | Unassigned | Unassigned | Outlier                           | Ref |
| MK358448 | Unassigned | Unassigned | Unassigned | Overlap (VC_442/VC_443)           | Ref |
| MK368614 | Unassigned | Unassigned | Unassigned | Overlap (VC_442/VC_443)           | Ref |
| MK411820 | Unassigned | Unassigned | Unassigned | Overlap (VC_750/VC_751)           | Ref |
| MK416016 | Unassigned | Unassigned | Unassigned | Outlier                           | Ref |
| MK416021 | Unassigned | Unassigned | Unassigned | Outlier                           | Ref |
| MK422450 | Unassigned | Unassigned | Unassigned | Outlier                           | Ref |
| MK422452 | Unassigned | Unassigned | Unassigned | Outlier                           | Ref |
| MK433264 | Unassigned | Unassigned | Unassigned | Overlap (VC_1095/VC_1096)         | Ref |
| MK433583 | Unassigned | Unassigned | Unassigned | Outlier                           | Ref |
| MK448228 | Unassigned | Unassigned | Unassigned | Outlier                           | Ref |
| MK448232 | Unassigned | Unassigned | Unassigned | Overlap (VC_59/VC_245)            | Ref |
| MK448236 | Unassigned | Unassigned | Unassigned | Outlier                           | Ref |
| MK448665 | Unassigned | Unassigned | Unassigned | Outlier                           | Ref |



|          |            |            |            |                                       |     |
|----------|------------|------------|------------|---------------------------------------|-----|
| MK448666 | Unassigned | Unassigned | Unassigned | Overlap (VC_633/VC_634)               | Ref |
| MK448668 | Unassigned | Unassigned | Unassigned | Overlap (VC_633/VC_634)               | Ref |
| MK448669 | Unassigned | Unassigned | Unassigned | Overlap (VC_256/VC_414)               | Ref |
| MK448670 | Unassigned | Unassigned | Unassigned | Overlap (VC_633/VC_634)               | Ref |
| MK448672 | Unassigned | Unassigned | Unassigned | Outlier                               | Ref |
| MK448677 | Unassigned | Unassigned | Unassigned | Overlap (VC_324/VC_539)               | Ref |
| MK448679 | Unassigned | Unassigned | Unassigned | Overlap (VC_324/VC_539)               | Ref |
| MK448682 | Unassigned | Unassigned | Unassigned | Overlap (VC_324/VC_539)               | Ref |
| MK448687 | Unassigned | Unassigned | Unassigned | Overlap (VC_633/VC_634)               | Ref |
| MK448691 | Unassigned | Unassigned | Unassigned | Overlap (VC_432/VC_774)               | Ref |
| MK448695 | Unassigned | Unassigned | Unassigned | Overlap (VC_633/VC_634)               | Ref |
| MK448701 | Unassigned | Unassigned | Unassigned | Overlap (VC_318/VC_321)               | Ref |
| MK448703 | Unassigned | Unassigned | Unassigned | Overlap (VC_324/VC_335/VC_636)        | Ref |
| MK448705 | Unassigned | Unassigned | Unassigned | Overlap (VC_322/VC_431)               | Ref |
| MK448712 | Unassigned | Unassigned | Unassigned | Overlap (VC_254/VC_258)               | Ref |
| MK448713 | Unassigned | Unassigned | Unassigned | Overlap (VC_633/VC_634)               | Ref |
| MK448715 | Unassigned | Unassigned | Unassigned | Overlap (VC_256/VC_414)               | Ref |
| MK448717 | Unassigned | Unassigned | Unassigned | Overlap (VC_633/VC_634)               | Ref |
| MK448718 | Unassigned | Unassigned | Unassigned | Outlier                               | Ref |
| MK448719 | Unassigned | Unassigned | Unassigned | Overlap (VC_633/VC_634)               | Ref |
| MK448722 | Unassigned | Unassigned | Unassigned | Overlap (VC_633/VC_634)               | Ref |
| MK448723 | Unassigned | Unassigned | Unassigned | Overlap (VC_637/VC_986)               | Ref |
| MK448725 | Unassigned | Unassigned | Unassigned | Outlier                               | Ref |
| MK448726 | Unassigned | Unassigned | Unassigned | Overlap (VC_633/VC_634)               | Ref |
| MK448727 | Unassigned | Unassigned | Unassigned | Outlier                               | Ref |
| MK448728 | Unassigned | Unassigned | Unassigned | Overlap (VC_633/VC_634)               | Ref |
| MK448729 | Unassigned | Unassigned | Unassigned | Overlap (VC_432/VC_774)               | Ref |
| MK448731 | Unassigned | Unassigned | Unassigned | Overlap (VC_334/VC_416/VC_430/VC_777) | Ref |
| MK448734 | Unassigned | Unassigned | Unassigned | Overlap (VC_334/VC_416/VC_430)        | Ref |
| MK448736 | Unassigned | Unassigned | Unassigned | Overlap (VC_318/VC_320)               | Ref |
| MK448737 | Unassigned | Unassigned | Unassigned | Outlier                               | Ref |
| MK448738 | Unassigned | Unassigned | Unassigned | Outlier                               | Ref |
| MK448742 | Unassigned | Unassigned | Unassigned | Overlap (VC_318/VC_320)               | Ref |
| MK448743 | Unassigned | Unassigned | Unassigned | Overlap (VC_324/VC_337)               | Ref |
| MK448746 | Unassigned | Unassigned | Unassigned | Overlap (VC_637/VC_986)               | Ref |
| MK448747 | Unassigned | Unassigned | Unassigned | Overlap (VC_254/VC_259)               | Ref |
| MK448748 | Unassigned | Unassigned | Unassigned | Overlap (VC_254/VC_259)               | Ref |
| MK448749 | Unassigned | Unassigned | Unassigned | Overlap (VC_294/VC_320)               | Ref |
| MK448751 | Unassigned | Unassigned | Unassigned | Overlap (VC_254/VC_259)               | Ref |
| MK448753 | Unassigned | Unassigned | Unassigned | Overlap (VC_637/VC_986)               | Ref |
| MK448754 | Unassigned | Unassigned | Unassigned | Overlap (VC_416/VC_430/VC_987)        | Ref |
| MK448755 | Unassigned | Unassigned | Unassigned | Overlap (VC_318/VC_320/VC_323)        | Ref |
| MK448756 | Unassigned | Unassigned | Unassigned | Overlap (VC_318/VC_320/VC_323)        | Ref |
| MK448760 | Unassigned | Unassigned | Unassigned | Overlap (VC_294/VC_385)               | Ref |
| MK448761 | Unassigned | Unassigned | Unassigned | Overlap (VC_294/VC_385)               | Ref |
| MK448764 | Unassigned | Unassigned | Unassigned | Overlap (VC_416/VC_430/VC_777)        | Ref |
| MK448768 | Unassigned | Unassigned | Unassigned | Overlap (VC_432/VC_774)               | Ref |
| MK448770 | Unassigned | Unassigned | Unassigned | Overlap (VC_324/VC_539)               | Ref |
| MK448776 | Unassigned | Unassigned | Unassigned | Overlap (VC_633/VC_634)               | Ref |
| MK448780 | Unassigned | Unassigned | Unassigned | Overlap (VC_633/VC_634)               | Ref |
| MK448781 | Unassigned | Unassigned | Unassigned | Overlap (VC_318/VC_320)               | Ref |
| MK448785 | Unassigned | Unassigned | Unassigned | Overlap (VC_324/VC_539)               | Ref |
| MK448787 | Unassigned | Unassigned | Unassigned | Overlap (VC_633/VC_634)               | Ref |
| MK448792 | Unassigned | Unassigned | Unassigned | Overlap (VC_324/VC_539)               | Ref |
| MK448796 | Unassigned | Unassigned | Unassigned | Outlier                               | Ref |
| MK448799 | Unassigned | Unassigned | Unassigned | Overlap (VC_256/VC_276)               | Ref |
| MK448800 | Unassigned | Unassigned | Unassigned | Overlap (VC_256/VC_276)               | Ref |
| MK448801 | Unassigned | Unassigned | Unassigned | Overlap (VC_294/VC_383)               | Ref |
| MK448802 | Unassigned | Unassigned | Unassigned | Overlap (VC_633/VC_634)               | Ref |
| MK448803 | Unassigned | Unassigned | Unassigned | Overlap (VC_318/VC_319)               | Ref |
| MK448806 | Unassigned | Unassigned | Unassigned | Overlap (VC_324/VC_335/VC_624)        | Ref |
| MK448809 | Unassigned | Unassigned | Unassigned | Overlap (VC_633/VC_634)               | Ref |
| MK448810 | Unassigned | Unassigned | Unassigned | Overlap (VC_319/VC_626)               | Ref |
| MK448812 | Unassigned | Unassigned | Unassigned | Overlap (VC_324/VC_335/VC_624)        | Ref |
| MK448813 | Unassigned | Unassigned | Unassigned | Overlap (VC_319/VC_790)               | Ref |
| MK448816 | Unassigned | Unassigned | Unassigned | Overlap (VC_318/VC_319)               | Ref |
| MK448817 | Unassigned | Unassigned | Unassigned | Outlier                               | Ref |
| MK448820 | Unassigned | Unassigned | Unassigned | Outlier                               | Ref |
| MK448823 | Unassigned | Unassigned | Unassigned | Overlap (VC_259/VC_625/VC_626)        | Ref |
| MK448825 | Unassigned | Unassigned | Unassigned | Overlap (VC_633/VC_634)               | Ref |
| MK448826 | Unassigned | Unassigned | Unassigned | Overlap (VC_414/VC_791)               | Ref |
| MK448827 | Unassigned | Unassigned | Unassigned | Overlap (VC_633/VC_634)               | Ref |
| MK448829 | Unassigned | Unassigned | Unassigned | Overlap (VC_318/VC_320)               | Ref |
| MK448830 | Unassigned | Unassigned | Unassigned | Outlier                               | Ref |
| MK448835 | Unassigned | Unassigned | Unassigned | Overlap (VC_633/VC_634)               | Ref |
| MK448836 | Unassigned | Unassigned | Unassigned | Overlap (VC_633/VC_634)               | Ref |
| MK448837 | Unassigned | Unassigned | Unassigned | Overlap (VC_318/VC_320)               | Ref |
| MK448838 | Unassigned | Unassigned | Unassigned | Outlier                               | Ref |
| MK448840 | Unassigned | Unassigned | Unassigned | Overlap (VC_633/VC_634)               | Ref |
| MK448842 | Unassigned | Unassigned | Unassigned | Outlier                               | Ref |
| MK448844 | Unassigned | Unassigned | Unassigned | Outlier                               | Ref |



|          |            |            |            |                                       |     |
|----------|------------|------------|------------|---------------------------------------|-----|
| MK448846 | Unassigned | Unassigned | Unassigned | Overlap (VC_633/VC_634)               | Ref |
| MK448847 | Unassigned | Unassigned | Unassigned | Overlap (VC_633/VC_634)               | Ref |
| MK448848 | Unassigned | Unassigned | Unassigned | Overlap (VC_324/VC_539)               | Ref |
| MK448849 | Unassigned | Unassigned | Unassigned | Outlier                               | Ref |
| MK448851 | Unassigned | Unassigned | Unassigned | Overlap (VC_320/VC_324)               | Ref |
| MK448856 | Unassigned | Unassigned | Unassigned | Outlier                               | Ref |
| MK448857 | Unassigned | Unassigned | Unassigned | Overlap (VC_324/VC_539)               | Ref |
| MK448860 | Unassigned | Unassigned | Unassigned | Overlap (VC_324/VC_539)               | Ref |
| MK448863 | Unassigned | Unassigned | Unassigned | Overlap (VC_334/VC_416/VC_430/VC_777) | Ref |
| MK448865 | Unassigned | Unassigned | Unassigned | Overlap (VC_318/VC_321)               | Ref |
| MK448869 | Unassigned | Unassigned | Unassigned | Overlap (VC_318/VC_321)               | Ref |
| MK448870 | Unassigned | Unassigned | Unassigned | Overlap (VC_318/VC_321)               | Ref |
| MK448872 | Unassigned | Unassigned | Unassigned | Overlap (VC_633/VC_634)               | Ref |
| MK448873 | Unassigned | Unassigned | Unassigned | Overlap (VC_322/VC_431)               | Ref |
| MK448876 | Unassigned | Unassigned | Unassigned | Overlap (VC_324/VC_335/VC_636)        | Ref |
| MK448878 | Unassigned | Unassigned | Unassigned | Outlier                               | Ref |
| MK448879 | Unassigned | Unassigned | Unassigned | Outlier                               | Ref |
| MK448880 | Unassigned | Unassigned | Unassigned | Overlap (VC_254/VC_258)               | Ref |
| MK448883 | Unassigned | Unassigned | Unassigned | Overlap (VC_633/VC_634)               | Ref |
| MK448884 | Unassigned | Unassigned | Unassigned | Outlier                               | Ref |
| MK448885 | Unassigned | Unassigned | Unassigned | Outlier                               | Ref |
| MK448888 | Unassigned | Unassigned | Unassigned | Overlap (VC_334/VC_416/VC_430/VC_777) | Ref |
| MK448889 | Unassigned | Unassigned | Unassigned | Outlier                               | Ref |
| MK448891 | Unassigned | Unassigned | Unassigned | Outlier                               | Ref |
| MK448892 | Unassigned | Unassigned | Unassigned | Overlap (VC_256/VC_414)               | Ref |
| MK448894 | Unassigned | Unassigned | Unassigned | Outlier                               | Ref |
| MK448903 | Unassigned | Unassigned | Unassigned | Overlap (VC_324/VC_337)               | Ref |
| MK448906 | Unassigned | Unassigned | Unassigned | Overlap (VC_633/VC_634)               | Ref |
| MK448907 | Unassigned | Unassigned | Unassigned | Overlap (VC_633/VC_634)               | Ref |
| MK448908 | Unassigned | Unassigned | Unassigned | Outlier                               | Ref |
| MK448911 | Unassigned | Unassigned | Unassigned | Overlap (VC_318/VC_320)               | Ref |
| MK448913 | Unassigned | Unassigned | Unassigned | Overlap (VC_633/VC_634)               | Ref |
| MK448916 | Unassigned | Unassigned | Unassigned | Overlap (VC_318/VC_320)               | Ref |
| MK448919 | Unassigned | Unassigned | Unassigned | Overlap (VC_324/VC_337)               | Ref |
| MK448921 | Unassigned | Unassigned | Unassigned | Overlap (VC_324/VC_337)               | Ref |
| MK448922 | Unassigned | Unassigned | Unassigned | Overlap (VC_633/VC_634)               | Ref |
| MK448924 | Unassigned | Unassigned | Unassigned | Overlap (VC_637/VC_986)               | Ref |
| MK448926 | Unassigned | Unassigned | Unassigned | Overlap (VC_254/VC_259)               | Ref |
| MK448928 | Unassigned | Unassigned | Unassigned | Overlap (VC_633/VC_634)               | Ref |
| MK448929 | Unassigned | Unassigned | Unassigned | Overlap (VC_416/VC_430/VC_987)        | Ref |
| MK448932 | Unassigned | Unassigned | Unassigned | Overlap (VC_256/VC_414)               | Ref |
| MK448935 | Unassigned | Unassigned | Unassigned | Overlap (VC_633/VC_634)               | Ref |
| MK448936 | Unassigned | Unassigned | Unassigned | Overlap (VC_633/VC_634)               | Ref |
| MK448937 | Unassigned | Unassigned | Unassigned | Outlier                               | Ref |
| MK448938 | Unassigned | Unassigned | Unassigned | Overlap (VC_318/VC_320)               | Ref |
| MK448940 | Unassigned | Unassigned | Unassigned | Overlap (VC_256/VC_414)               | Ref |
| MK448948 | Unassigned | Unassigned | Unassigned | Overlap (VC_432/VC_774)               | Ref |
| MK448956 | Unassigned | Unassigned | Unassigned | Overlap (VC_320/VC_324)               | Ref |
| MK448971 | Unassigned | Unassigned | Unassigned | Overlap (VC_320/VC_324)               | Ref |
| MK448978 | Unassigned | Unassigned | Unassigned | Overlap (VC_324/VC_539)               | Ref |
| MK448979 | Unassigned | Unassigned | Unassigned | Overlap (VC_256/VC_276)               | Ref |
| MK448980 | Unassigned | Unassigned | Unassigned | Outlier                               | Ref |
| MK448981 | Unassigned | Unassigned | Unassigned | Overlap (VC_318/VC_319)               | Ref |
| MK448984 | Unassigned | Unassigned | Unassigned | Overlap (VC_318/VC_319)               | Ref |
| MK448985 | Unassigned | Unassigned | Unassigned | Overlap (VC_318/VC_319)               | Ref |
| MK448986 | Unassigned | Unassigned | Unassigned | Outlier                               | Ref |
| MK448987 | Unassigned | Unassigned | Unassigned | Outlier                               | Ref |
| MK448990 | Unassigned | Unassigned | Unassigned | Overlap (VC_324/VC_335/VC_624)        | Ref |
| MK448992 | Unassigned | Unassigned | Unassigned | Overlap (VC_334/VC_416/VC_430/VC_777) | Ref |
| MK448993 | Unassigned | Unassigned | Unassigned | Outlier                               | Ref |
| MK448994 | Unassigned | Unassigned | Unassigned | Overlap (VC_633/VC_634)               | Ref |
| MK448996 | Unassigned | Unassigned | Unassigned | Overlap (VC_259/VC_625/VC_626)        | Ref |
| MK448998 | Unassigned | Unassigned | Unassigned | Outlier                               | Ref |
| MK448999 | Unassigned | Unassigned | Unassigned | Overlap (VC_633/VC_634)               | Ref |
| MK449001 | Unassigned | Unassigned | Unassigned | Overlap (VC_414/VC_791)               | Ref |
| MK449005 | Unassigned | Unassigned | Unassigned | Outlier                               | Ref |
| MK449007 | Unassigned | Unassigned | Unassigned | Overlap (VC_633/VC_634)               | Ref |
| MK449011 | Unassigned | Unassigned | Unassigned | Overlap (VC_633/VC_634)               | Ref |
| MK493321 | Unassigned | Unassigned | Unassigned | Overlap (VC_435/VC_656)               | Ref |
| MK493322 | Unassigned | Unassigned | Unassigned | Overlap (VC_435/VC_656)               | Ref |
| MK493323 | Unassigned | Unassigned | Unassigned | Overlap (VC_435/VC_656)               | Ref |
| MK493324 | Unassigned | Unassigned | Unassigned | Overlap (VC_435/VC_656)               | Ref |
| MK493325 | Unassigned | Unassigned | Unassigned | Overlap (VC_435/VC_656)               | Ref |
| MK494120 | Unassigned | Unassigned | Unassigned | Overlap (VC_521/VC_550)               | Ref |
| MK496684 | Unassigned | Unassigned | Unassigned | Singleton                             | Ref |
| MK496687 | Unassigned | Unassigned | Unassigned | Singleton                             | Ref |
| MK496691 | Unassigned | Unassigned | Unassigned | Outlier                               | Ref |
| MK496695 | Unassigned | Unassigned | Unassigned | Singleton                             | Ref |
| MK496703 | Unassigned | Unassigned | Unassigned | Outlier                               | Ref |
| MK496705 | Unassigned | Unassigned | Unassigned | Singleton                             | Ref |
| MK496706 | Unassigned | Unassigned | Unassigned | Outlier                               | Ref |



|          |            |            |            |                                   |     |
|----------|------------|------------|------------|-----------------------------------|-----|
| MK496707 | Unassigned | Unassigned | Unassigned | Overlap (VC_1372/VC_1373)         | Ref |
| MK496708 | Unassigned | Unassigned | Unassigned | Singleton                         | Ref |
| MK496709 | Unassigned | Unassigned | Unassigned | Singleton                         | Ref |
| MK496713 | Unassigned | Unassigned | Unassigned | Singleton                         | Ref |
| MK496715 | Unassigned | Unassigned | Unassigned | Overlap (VC_1270/VC_1271)         | Ref |
| MK496718 | Unassigned | Unassigned | Unassigned | Singleton                         | Ref |
| MK496722 | Unassigned | Unassigned | Unassigned | Outlier                           | Ref |
| MK496724 | Unassigned | Unassigned | Unassigned | Outlier                           | Ref |
| MK496726 | Unassigned | Unassigned | Unassigned | Overlap (VC_1106/VC_1107)         | Ref |
| MK496727 | Unassigned | Unassigned | Unassigned | Singleton                         | Ref |
| MK496728 | Unassigned | Unassigned | Unassigned | Outlier                           | Ref |
| MK496730 | Unassigned | Unassigned | Unassigned | Singleton                         | Ref |
| MK496731 | Unassigned | Unassigned | Unassigned | Outlier                           | Ref |
| MK496733 | Unassigned | Unassigned | Unassigned | Overlap (VC_1054/VC_1058)         | Ref |
| MK496734 | Unassigned | Unassigned | Unassigned | Outlier                           | Ref |
| MK496735 | Unassigned | Unassigned | Unassigned | Outlier                           | Ref |
| MK496736 | Unassigned | Unassigned | Unassigned | Singleton                         | Ref |
| MK496737 | Unassigned | Unassigned | Unassigned | Outlier                           | Ref |
| MK496739 | Unassigned | Unassigned | Unassigned | Overlap (VC_1054/VC_1058)         | Ref |
| MK496740 | Unassigned | Unassigned | Unassigned | Outlier                           | Ref |
| MK496741 | Unassigned | Unassigned | Unassigned | Overlap (VC_1130/VC_1135)         | Ref |
| MK496742 | Unassigned | Unassigned | Unassigned | Overlap (VC_1054/VC_1055)         | Ref |
| MK496747 | Unassigned | Unassigned | Unassigned | Outlier                           | Ref |
| MK496749 | Unassigned | Unassigned | Unassigned | Singleton                         | Ref |
| MK496751 | Unassigned | Unassigned | Unassigned | Outlier                           | Ref |
| MK496752 | Unassigned | Unassigned | Unassigned | Overlap (VC_1067/VC_1068)         | Ref |
| MK496755 | Unassigned | Unassigned | Unassigned | Singleton                         | Ref |
| MK496759 | Unassigned | Unassigned | Unassigned | Singleton                         | Ref |
| MK496762 | Unassigned | Unassigned | Unassigned | Singleton                         | Ref |
| MK496763 | Unassigned | Unassigned | Unassigned | Outlier                           | Ref |
| MK496769 | Unassigned | Unassigned | Unassigned | Singleton                         | Ref |
| MK496773 | Unassigned | Unassigned | Unassigned | Singleton                         | Ref |
| MK496777 | Unassigned | Unassigned | Unassigned | Singleton                         | Ref |
| MK496778 | Unassigned | Unassigned | Unassigned | Overlap (VC_1130/VC_1135)         | Ref |
| MK496783 | Unassigned | Unassigned | Unassigned | Singleton                         | Ref |
| MK496788 | Unassigned | Unassigned | Unassigned | Overlap (VC_1130/VC_1132/VC_1249) | Ref |
| MK496789 | Unassigned | Unassigned | Unassigned | Overlap (VC_1270/VC_1271)         | Ref |
| MK496791 | Unassigned | Unassigned | Unassigned | Singleton                         | Ref |
| MK496793 | Unassigned | Unassigned | Unassigned | Outlier                           | Ref |
| MK496794 | Unassigned | Unassigned | Unassigned | Singleton                         | Ref |
| MK496795 | Unassigned | Unassigned | Unassigned | Outlier                           | Ref |
| MK496797 | Unassigned | Unassigned | Unassigned | Overlap (VC_1130/VC_1249)         | Ref |
| MK496798 | Unassigned | Unassigned | Unassigned | Outlier                           | Ref |
| MK496799 | Unassigned | Unassigned | Unassigned | Outlier                           | Ref |
| MK496800 | Unassigned | Unassigned | Unassigned | Singleton                         | Ref |
| MK496801 | Unassigned | Unassigned | Unassigned | Outlier                           | Ref |
| MK496802 | Unassigned | Unassigned | Unassigned | Outlier                           | Ref |
| MK496803 | Unassigned | Unassigned | Unassigned | Overlap (VC_1133/VC_1135)         | Ref |
| MK496806 | Unassigned | Unassigned | Unassigned | Overlap (VC_1114/VC_1136)         | Ref |
| MK496807 | Unassigned | Unassigned | Unassigned | Outlier                           | Ref |
| MK496809 | Unassigned | Unassigned | Unassigned | Outlier                           | Ref |
| MK496810 | Unassigned | Unassigned | Unassigned | Outlier                           | Ref |
| MK496814 | Unassigned | Unassigned | Unassigned | Outlier                           | Ref |
| MK496817 | Unassigned | Unassigned | Unassigned | Singleton                         | Ref |
| MK496819 | Unassigned | Unassigned | Unassigned | Singleton                         | Ref |
| MK496821 | Unassigned | Unassigned | Unassigned | Outlier                           | Ref |
| MK496822 | Unassigned | Unassigned | Unassigned | Overlap (VC_996/VC_1065)          | Ref |
| MK496823 | Unassigned | Unassigned | Unassigned | Overlap (VC_996/VC_1065)          | Ref |
| MK496826 | Unassigned | Unassigned | Unassigned | Outlier                           | Ref |
| MK504445 | Unassigned | Unassigned | Unassigned | Outlier                           | Ref |
| MK524492 | Unassigned | Unassigned | Unassigned | Overlap (VC_227/VC_941)           | Ref |
| MK533143 | Unassigned | Unassigned | Unassigned | Outlier                           | Ref |
| MK552105 | Unassigned | Unassigned | Unassigned | Outlier                           | Ref |
| MK554696 | Unassigned | Unassigned | Unassigned | Outlier                           | Ref |
| MK557849 | Unassigned | Unassigned | Unassigned | Singleton                         | Ref |
| MK560763 | Unassigned | Unassigned | Unassigned | Outlier                           | Ref |
| MK570056 | Unassigned | Unassigned | Unassigned | Singleton                         | Ref |
| MK570057 | Unassigned | Unassigned | Unassigned | Outlier                           | Ref |
| MK575466 | Unassigned | Unassigned | Unassigned | Overlap (VC_129/VC_711)           | Ref |
| MK613347 | Unassigned | Unassigned | Unassigned | Outlier                           | Ref |
| MK613348 | Unassigned | Unassigned | Unassigned | Outlier                           | Ref |
| MK613349 | Unassigned | Unassigned | Unassigned | Outlier                           | Ref |
| MK618717 | Unassigned | Unassigned | Unassigned | Overlap (VC_82/VC_619)            | Ref |
| MK620899 | Unassigned | Unassigned | Unassigned | Overlap (VC_1098/VC_1099)         | Ref |
| MK629525 | Unassigned | Unassigned | Unassigned | Outlier                           | Ref |
| MK629526 | Unassigned | Unassigned | Unassigned | Outlier                           | Ref |
| MK629529 | Unassigned | Unassigned | Unassigned | Outlier                           | Ref |
| MK660713 | Unassigned | Unassigned | Unassigned | Outlier                           | Ref |
| MK672802 | Unassigned | Unassigned | Unassigned | Overlap (VC_127/VC_789)           | Ref |
| MK672805 | Unassigned | Unassigned | Unassigned | Overlap (VC_127/VC_789)           | Ref |
| MK675901 | Unassigned | Unassigned | Unassigned | Outlier                           | Ref |



|           |            |            |            |                                   |     |
|-----------|------------|------------|------------|-----------------------------------|-----|
| MK686070  | Unassigned | Unassigned | Unassigned | Overlap (VC_872/VC_873)           | Ref |
| MK686072  | Unassigned | Unassigned | Unassigned | Overlap (VC_872/VC_873)           | Ref |
| MK765554  | Unassigned | Unassigned | Unassigned | Overlap (VC_1284/VC_1285)         | Ref |
| MK765566  | Unassigned | Unassigned | Unassigned | Overlap (VC_1284/VC_1285)         | Ref |
| MK765570  | Unassigned | Unassigned | Unassigned | Singleton                         | Ref |
| MK765584  | Unassigned | Unassigned | Unassigned | Singleton                         | Ref |
| MK765585  | Unassigned | Unassigned | Unassigned | Outlier                           | Ref |
| MK765586  | Unassigned | Unassigned | Unassigned | Overlap (VC_1284/VC_1285)         | Ref |
| MK765595  | Unassigned | Unassigned | Unassigned | Overlap (VC_1403/VC_1405)         | Ref |
| MK765597  | Unassigned | Unassigned | Unassigned | Overlap (VC_1284/VC_1285)         | Ref |
| MK765608  | Unassigned | Unassigned | Unassigned | Singleton                         | Ref |
| MK765614  | Unassigned | Unassigned | Unassigned | Overlap (VC_1284/VC_1285)         | Ref |
| MK765616  | Unassigned | Unassigned | Unassigned | Overlap (VC_1284/VC_1285)         | Ref |
| MK765618  | Unassigned | Unassigned | Unassigned | Overlap (VC_1284/VC_1285)         | Ref |
| MK765619  | Unassigned | Unassigned | Unassigned | Outlier                           | Ref |
| MK765624  | Unassigned | Unassigned | Unassigned | Overlap (VC_1403/VC_1405)         | Ref |
| MK765627  | Unassigned | Unassigned | Unassigned | Overlap (VC_1403/VC_1405)         | Ref |
| MK765629  | Unassigned | Unassigned | Unassigned | Overlap (VC_1403/VC_1405)         | Ref |
| MK765632  | Unassigned | Unassigned | Unassigned | Outlier                           | Ref |
| MK765635  | Unassigned | Unassigned | Unassigned | Outlier                           | Ref |
| MK765636  | Unassigned | Unassigned | Unassigned | Overlap (VC_1284/VC_1285)         | Ref |
| MK765637  | Unassigned | Unassigned | Unassigned | Overlap (VC_1284/VC_1285)         | Ref |
| MK765647  | Unassigned | Unassigned | Unassigned | Overlap (VC_1284/VC_1285)         | Ref |
| MK765652  | Unassigned | Unassigned | Unassigned | Overlap (VC_1284/VC_1285)         | Ref |
| MK765665  | Unassigned | Unassigned | Unassigned | Overlap (VC_1284/VC_1285)         | Ref |
| MK770119  | Unassigned | Unassigned | Unassigned | Outlier                           | Ref |
| MK791318  | Unassigned | Unassigned | Unassigned | Outlier                           | Ref |
| MK801729  | Unassigned | Unassigned | Unassigned | Overlap (VC_526/VC_554)           | Ref |
| MK813942  | Unassigned | Unassigned | Unassigned | Outlier                           | Ref |
| MK813943  | Unassigned | Unassigned | Unassigned | Overlap (VC_602/VC_813)           | Ref |
| MK838112  | Unassigned | Unassigned | Unassigned | Overlap (VC_602/VC_813)           | Ref |
| MK838114  | Unassigned | Unassigned | Unassigned | Overlap (VC_602/VC_813)           | Ref |
| MK838115  | Unassigned | Unassigned | Unassigned | Overlap (VC_602/VC_813)           | Ref |
| MK843319  | Unassigned | Unassigned | Unassigned | Overlap (VC_654/VC_747)           | Ref |
| MK875792  | Unassigned | Unassigned | Unassigned | Overlap (VC_521/VC_548)           | Ref |
| MK875794  | Unassigned | Unassigned | Unassigned | Overlap (VC_1164/VC_1243)         | Ref |
| MK878902  | Unassigned | Unassigned | Unassigned | Overlap (VC_526/VC_554)           | Ref |
| MK882925  | Unassigned | Unassigned | Unassigned | Outlier                           | Ref |
| MK894437  | Unassigned | Unassigned | Unassigned | Overlap (VC_1241/VC_1242)         | Ref |
| MK9003280 | Unassigned | Unassigned | Unassigned | Overlap (VC_75/VC_115)            | Ref |
| MK9005543 | Unassigned | Unassigned | Unassigned | Overlap (VC_442/VC_443)           | Ref |
| MK911750  | Unassigned | Unassigned | Unassigned | Overlap (VC_629/VC_637/VC_986)    | Ref |
| MK937592  | Unassigned | Unassigned | Unassigned | Overlap (VC_560/VC_562)           | Ref |
| MK937605  | Unassigned | Unassigned | Unassigned | Overlap (VC_227/VC_941)           | Ref |
| MK937609  | Unassigned | Unassigned | Unassigned | Overlap (VC_526/VC_554)           | Ref |
| MK942064  | Unassigned | Unassigned | Unassigned | Overlap (VC_279/VC_283)           | Ref |
| MK967380  | Unassigned | Unassigned | Unassigned | Outlier                           | Ref |
| MK972688  | Unassigned | Unassigned | Unassigned | Overlap (VC_29/VC_37)             | Ref |
| MK972689  | Unassigned | Unassigned | Unassigned | Overlap (VC_29/VC_37)             | Ref |
| MK972695  | Unassigned | Unassigned | Unassigned | Overlap (VC_29/VC_37)             | Ref |
| MK972696  | Unassigned | Unassigned | Unassigned | Overlap (VC_29/VC_37)             | Ref |
| MK972697  | Unassigned | Unassigned | Unassigned | Overlap (VC_29/VC_37)             | Ref |
| MK977695  | Unassigned | Unassigned | Unassigned | Overlap (VC_560/VC_563)           | Ref |
| MK977696  | Unassigned | Unassigned | Unassigned | Overlap (VC_560/VC_563)           | Ref |
| MK977703  | Unassigned | Unassigned | Unassigned | Overlap (VC_1034/VC_1035/VC_1039) | Ref |
| MK977704  | Unassigned | Unassigned | Unassigned | Overlap (VC_1095/VC_1096)         | Ref |
| MK977707  | Unassigned | Unassigned | Unassigned | Outlier                           | Ref |
| MK984681  | Unassigned | Unassigned | Unassigned | Overlap (VC_482/VC_484)           | Ref |
| MK994522  | Unassigned | Unassigned | Unassigned | Singleton                         | Ref |
| MN013081  | Unassigned | Unassigned | Unassigned | Overlap (VC_491/VC_492)           | Ref |
| MN013084  | Unassigned | Unassigned | Unassigned | Overlap (VC_286/VC_290/VC_491)    | Ref |
| MN013090  | Unassigned | Unassigned | Unassigned | Overlap (VC_82/VC_619)            | Ref |
| MN013189  | Unassigned | Unassigned | Unassigned | Singleton                         | Ref |
| MN044033  | Unassigned | Unassigned | Unassigned | Overlap (VC_491/VC_492)           | Ref |
| MN062189  | Unassigned | Unassigned | Unassigned | Overlap (VC_82/VC_619)            | Ref |
| MN062703  | Unassigned | Unassigned | Unassigned | Overlap (VC_1241/VC_1242)         | Ref |
| MN062705  | Unassigned | Unassigned | Unassigned | Overlap (VC_983/VC_984)           | Ref |
| MN062720  | Unassigned | Unassigned | Unassigned | Outlier                           | Ref |
| MN082625  | Unassigned | Unassigned | Unassigned | Overlap (VC_818/VC_820)           | Ref |
| MN096267  | Unassigned | Unassigned | Unassigned | Overlap (VC_177/VC_296)           | Ref |
| MN096355  | Unassigned | Unassigned | Unassigned | Outlier                           | Ref |
| MN096362  | Unassigned | Unassigned | Unassigned | Outlier                           | Ref |
| MN096369  | Unassigned | Unassigned | Unassigned | Overlap (VC_1098/VC_1099)         | Ref |
| MN102376  | Unassigned | Unassigned | Unassigned | Overlap (VC_615/VC_965)           | Ref |
| MN103401  | Unassigned | Unassigned | Unassigned | Outlier                           | Ref |
| MN103533  | Unassigned | Unassigned | Unassigned | Outlier                           | Ref |
| MN106244  | Unassigned | Unassigned | Unassigned | Overlap (VC_593/VC_597)           | Ref |
| MN106245  | Unassigned | Unassigned | Unassigned | Overlap (VC_491/VC_492)           | Ref |
| MN175679  | Unassigned | Unassigned | Unassigned | Overlap (VC_615/VC_965)           | Ref |
| MN176220  | Unassigned | Unassigned | Unassigned | Overlap (VC_101/VC_106)           | Ref |
| MN176221  | Unassigned | Unassigned | Unassigned | Overlap (VC_101/VC_106)           | Ref |



|          |            |            |            |                                           |     |
|----------|------------|------------|------------|-------------------------------------------|-----|
| MN176230 | Unassigned | Unassigned | Unassigned | Overlap (VC_101/VC_106)                   | Ref |
| MN176231 | Unassigned | Unassigned | Unassigned | Overlap (VC_101/VC_106)                   | Ref |
| MN176232 | Unassigned | Unassigned | Unassigned | Overlap (VC_101/VC_106)                   | Ref |
| MN180253 | Unassigned | Unassigned | Unassigned | Outlier                                   | Ref |
| MN184886 | Unassigned | Unassigned | Unassigned | Outlier                                   | Ref |
| MN204502 | Unassigned | Unassigned | Unassigned | Overlap (VC_521/VC_548)                   | Ref |
| MN224566 | Unassigned | Unassigned | Unassigned | Outlier                                   | Ref |
| MN234170 | Unassigned | Unassigned | Unassigned | Outlier                                   | Ref |
| MN234172 | Unassigned | Unassigned | Unassigned | Outlier                                   | Ref |
| MN234173 | Unassigned | Unassigned | Unassigned | Overlap (VC_1165/VC_1166)                 | Ref |
| MN234175 | Unassigned | Unassigned | Unassigned | Overlap (VC_1165/VC_1166)                 | Ref |
| MN234178 | Unassigned | Unassigned | Unassigned | Outlier                                   | Ref |
| MN234180 | Unassigned | Unassigned | Unassigned | Overlap (VC_1165/VC_1166)                 | Ref |
| MN234184 | Unassigned | Unassigned | Unassigned | Outlier                                   | Ref |
| MN234186 | Unassigned | Unassigned | Unassigned | Overlap (VC_1165/VC_1166)                 | Ref |
| MN234188 | Unassigned | Unassigned | Unassigned | Outlier                                   | Ref |
| MN234189 | Unassigned | Unassigned | Unassigned | Overlap (VC_983/VC_984)                   | Ref |
| MN234191 | Unassigned | Unassigned | Unassigned | Outlier                                   | Ref |
| MN234202 | Unassigned | Unassigned | Unassigned | Overlap (VC_1165/VC_1166)                 | Ref |
| MN234210 | Unassigned | Unassigned | Unassigned | Overlap (VC_1165/VC_1166)                 | Ref |
| MN234218 | Unassigned | Unassigned | Unassigned | Overlap (VC_526/VC_554)                   | Ref |
| MN234229 | Unassigned | Unassigned | Unassigned | Overlap (VC_1165/VC_1166)                 | Ref |
| MN266305 | Unassigned | Unassigned | Unassigned | Outlier                                   | Ref |
| MN270889 | Unassigned | Unassigned | Unassigned | Overlap (VC_481/VC_482/VC_484)            | Ref |
| MN270890 | Unassigned | Unassigned | Unassigned | Overlap (VC_481/VC_482/VC_484)            | Ref |
| MN284903 | Unassigned | Unassigned | Unassigned | Outlier                                   | Ref |
| MN308080 | Unassigned | Unassigned | Unassigned | Overlap (VC_392/VC_395)                   | Ref |
| MN327636 | Unassigned | Unassigned | Unassigned | Overlap (VC_392/VC_395)                   | Ref |
| MN335165 | Unassigned | Unassigned | Unassigned | Singleton                                 | Ref |
| MN379461 | Unassigned | Unassigned | Unassigned | Outlier                                   | Ref |
| MN379631 | Unassigned | Unassigned | Unassigned | Outlier                                   | Ref |
| MN379634 | Unassigned | Unassigned | Unassigned | Overlap (VC_1056/VC_1057/VC_1061/VC_1143) | Ref |
| MN379635 | Unassigned | Unassigned | Unassigned | Overlap (VC_1120/VC_1121)                 | Ref |
| MN379642 | Unassigned | Unassigned | Unassigned | Overlap (VC_1055/VC_1057)                 | Ref |
| MN379644 | Unassigned | Unassigned | Unassigned | Overlap (VC_1079/VC_1081)                 | Ref |
| MN379649 | Unassigned | Unassigned | Unassigned | Overlap (VC_1079/VC_1081)                 | Ref |
| MN395284 | Unassigned | Unassigned | Unassigned | Overlap (VC_491/VC_492)                   | Ref |
| MN399336 | Unassigned | Unassigned | Unassigned | Overlap (VC_702/VC_704)                   | Ref |
| MN428047 | Unassigned | Unassigned | Unassigned | Overlap (VC_521/VC_548)                   | Ref |
| MN428048 | Unassigned | Unassigned | Unassigned | Overlap (VC_526/VC_554)                   | Ref |
| MN428055 | Unassigned | Unassigned | Unassigned | Overlap (VC_526/VC_554)                   | Ref |
| MN428057 | Unassigned | Unassigned | Unassigned | Overlap (VC_526/VC_554)                   | Ref |
| MN434092 | Unassigned | Unassigned | Unassigned | Overlap (VC_491/VC_492)                   | Ref |
| MN478374 | Unassigned | Unassigned | Unassigned | Overlap (VC_596/VC_599)                   | Ref |
| MN478376 | Unassigned | Unassigned | Unassigned | Overlap (VC_455/VC_1028)                  | Ref |
| MN497414 | Unassigned | Unassigned | Unassigned | Outlier                                   | Ref |
| MN497415 | Unassigned | Unassigned | Unassigned | Overlap (VC_702/VC_704)                   | Ref |
| MN505213 | Unassigned | Unassigned | Unassigned | Outlier                                   | Ref |
| MN508356 | Unassigned | Unassigned | Unassigned | Outlier                                   | Ref |
| MN518139 | Unassigned | Unassigned | Unassigned | Outlier                                   | Ref |
| MN524844 | Unassigned | Unassigned | Unassigned | Overlap (VC_818/VC_821)                   | Ref |
| MN524845 | Unassigned | Unassigned | Unassigned | Overlap (VC_818/VC_821)                   | Ref |
| MN530981 | Unassigned | Unassigned | Unassigned | Outlier                                   | Ref |
| MN534315 | Unassigned | Unassigned | Unassigned | Overlap (VC_257/VC_262)                   | Ref |
| MN534318 | Unassigned | Unassigned | Unassigned | Overlap (VC_257/VC_262)                   | Ref |
| MN534319 | Unassigned | Unassigned | Unassigned | Overlap (VC_257/VC_262)                   | Ref |
| MN536026 | Unassigned | Unassigned | Unassigned | Outlier                                   | Ref |
| MN539721 | Unassigned | Unassigned | Unassigned | Outlier                                   | Ref |
| MN545971 | Unassigned | Unassigned | Unassigned | Outlier                                   | Ref |
| MN562221 | Unassigned | Unassigned | Unassigned | Overlap (VC_442/VC_443)                   | Ref |
| MN584918 | Unassigned | Unassigned | Unassigned | Outlier                                   | Ref |
| MN585195 | Unassigned | Unassigned | Unassigned | Outlier                                   | Ref |
| MN586020 | Unassigned | Unassigned | Unassigned | Outlier                                   | Ref |
| MN586025 | Unassigned | Unassigned | Unassigned | Overlap (VC_238/VC_240)                   | Ref |
| MN586033 | Unassigned | Unassigned | Unassigned | Outlier                                   | Ref |
| MN586040 | Unassigned | Unassigned | Unassigned | Overlap (VC_560/VC_561/VC_562/VC_563)     | Ref |
| MN602881 | Unassigned | Unassigned | Unassigned | Outlier                                   | Ref |
| MN605466 | Unassigned | Unassigned | Unassigned | Outlier                                   | Ref |
| MN617835 | Unassigned | Unassigned | Unassigned | Overlap (VC_286/VC_290/VC_491)            | Ref |
| MN685189 | Unassigned | Unassigned | Unassigned | Overlap (VC_481/VC_482/VC_484)            | Ref |
| MN685190 | Unassigned | Unassigned | Unassigned | Overlap (VC_481/VC_482/VC_484)            | Ref |
| MN685191 | Unassigned | Unassigned | Unassigned | Overlap (VC_481/VC_482/VC_484)            | Ref |
| MN692199 | Unassigned | Unassigned | Unassigned | Outlier                                   | Ref |
| MN692200 | Unassigned | Unassigned | Unassigned | Outlier                                   | Ref |
| MN698244 | Unassigned | Unassigned | Unassigned | Outlier                                   | Ref |
| MN718199 | Unassigned | Unassigned | Unassigned | Outlier                                   | Ref |
| MN734436 | Unassigned | Unassigned | Unassigned | Outlier                                   | Ref |
| MN735433 | Unassigned | Unassigned | Unassigned | Overlap (VC_521/VC_548)                   | Ref |
| MN746332 | Unassigned | Unassigned | Unassigned | Overlap (VC_279/VC_283)                   | Ref |
| MN781108 | Unassigned | Unassigned | Unassigned | Overlap (VC_491/VC_492)                   | Ref |
| MN794238 | Unassigned | Unassigned | Unassigned | Overlap (VC_905/VC_907)                   | Ref |



|          |            |            |            |                                |     |
|----------|------------|------------|------------|--------------------------------|-----|
| MN812211 | Unassigned | Unassigned | Unassigned | Outlier                        | Ref |
| MN812239 | Unassigned | Unassigned | Unassigned | Outlier                        | Ref |
| MN812689 | Unassigned | Unassigned | Unassigned | Outlier                        | Ref |
| MN813681 | Unassigned | Unassigned | Unassigned | Overlap (VC_227/VC_941)        | Ref |
| MN813685 | Unassigned | Unassigned | Unassigned | Outlier                        | Ref |
| MN813686 | Unassigned | Unassigned | Unassigned | Outlier                        | Ref |
| MN820898 | Unassigned | Unassigned | Unassigned | Outlier                        | Ref |
| MN830252 | Unassigned | Unassigned | Unassigned | Overlap (VC_274/VC_382)        | Ref |
| MN830253 | Unassigned | Unassigned | Unassigned | Overlap (VC_274/VC_382)        | Ref |
| MN830257 | Unassigned | Unassigned | Unassigned | Outlier                        | Ref |
| MN830259 | Unassigned | Unassigned | Unassigned | Overlap (VC_273/VC_384)        | Ref |
| MN840487 | Unassigned | Unassigned | Unassigned | Overlap (VC_932/VC_1050)       | Ref |
| MN850599 | Unassigned | Unassigned | Unassigned | Outlier                        | Ref |
| MN850656 | Unassigned | Unassigned | Unassigned | Outlier                        | Ref |
| MN857473 | Unassigned | Unassigned | Unassigned | Outlier                        | Ref |
| MN857617 | Unassigned | Unassigned | Unassigned | Overlap (VC_818/VC_820)        | Ref |
| MN862334 | Unassigned | Unassigned | Unassigned | Overlap (VC_406/VC_1250)       | Ref |
| MN862336 | Unassigned | Unassigned | Unassigned | Overlap (VC_199/VC_401)        | Ref |
| MN862337 | Unassigned | Unassigned | Unassigned | Overlap (VC_998/VC_1002)       | Ref |
| MN862342 | Unassigned | Unassigned | Unassigned | Overlap (VC_199/VC_401)        | Ref |
| MN862344 | Unassigned | Unassigned | Unassigned | Outlier                        | Ref |
| MN862347 | Unassigned | Unassigned | Unassigned | Singleton                      | Ref |
| MN871440 | Unassigned | Unassigned | Unassigned | Overlap (VC_444/VC_580)        | Ref |
| MN871477 | Unassigned | Unassigned | Unassigned | Outlier                        | Ref |
| MN877442 | Unassigned | Unassigned | Unassigned | Outlier                        | Ref |
| MN882550 | Unassigned | Unassigned | Unassigned | Overlap (VC_877/VC_1413)       | Ref |
| MN882553 | Unassigned | Unassigned | Unassigned | Overlap (VC_817/VC_1210)       | Ref |
| MN882554 | Unassigned | Unassigned | Unassigned | Overlap (VC_877/VC_1413)       | Ref |
| MN892485 | Unassigned | Unassigned | Unassigned | Outlier                        | Ref |
| MN908684 | Unassigned | Unassigned | Unassigned | Overlap (VC_1035/VC_1039)      | Ref |
| MN908686 | Unassigned | Unassigned | Unassigned | Overlap (VC_1164/VC_1243)      | Ref |
| MN908687 | Unassigned | Unassigned | Unassigned | Overlap (VC_560/VC_563)        | Ref |
| MN908688 | Unassigned | Unassigned | Unassigned | Outlier                        | Ref |
| MN908694 | Unassigned | Unassigned | Unassigned | Overlap (VC_1172/VC_1173)      | Ref |
| MN917146 | Unassigned | Unassigned | Unassigned | Overlap (VC_674/VC_675)        | Ref |
| MN922296 | Unassigned | Unassigned | Unassigned | Overlap (VC_355/VC_618)        | Ref |
| MN935203 | Unassigned | Unassigned | Unassigned | Overlap (VC_194/VC_195)        | Ref |
| MN938931 | Unassigned | Unassigned | Unassigned | Overlap (VC_629/VC_637/VC_986) | Ref |
| MN945900 | Unassigned | Unassigned | Unassigned | Overlap (VC_521/VC_548)        | Ref |
| MN956515 | Unassigned | Unassigned | Unassigned | Overlap (VC_355/VC_618)        | Ref |
| MN988464 | Unassigned | Unassigned | Unassigned | Overlap (VC_1403/VC_1406)      | Ref |
| MN988476 | Unassigned | Unassigned | Unassigned | Overlap (VC_1403/VC_1406)      | Ref |
| MN988477 | Unassigned | Unassigned | Unassigned | Overlap (VC_1403/VC_1406)      | Ref |
| MN988483 | Unassigned | Unassigned | Unassigned | Overlap (VC_784/VC_786)        | Ref |
| MN988487 | Unassigned | Unassigned | Unassigned | Outlier                        | Ref |
| MN988497 | Unassigned | Unassigned | Unassigned | Overlap (VC_784/VC_786)        | Ref |
| MN988517 | Unassigned | Unassigned | Unassigned | Overlap (VC_784/VC_786)        | Ref |
| MN988519 | Unassigned | Unassigned | Unassigned | Outlier                        | Ref |
| MN988539 | Unassigned | Unassigned | Unassigned | Outlier                        | Ref |
| MN988542 | Unassigned | Unassigned | Unassigned | Outlier                        | Ref |
| MN988555 | Unassigned | Unassigned | Unassigned | Overlap (VC_784/VC_786)        | Ref |
| MN995824 | Unassigned | Unassigned | Unassigned | Overlap (VC_431/VC_742)        | Ref |
| MT002873 | Unassigned | Unassigned | Unassigned | Outlier                        | Ref |
| MT006236 | Unassigned | Unassigned | Unassigned | Outlier                        | Ref |
| MT024859 | Unassigned | Unassigned | Unassigned | Outlier                        | Ref |
| MT024862 | Unassigned | Unassigned | Unassigned | Overlap (VC_1164/VC_1243)      | Ref |
| MT028491 | Unassigned | Unassigned | Unassigned | Outlier                        | Ref |
| MT028492 | Unassigned | Unassigned | Unassigned | Outlier                        | Ref |
| MT094430 | Unassigned | Unassigned | Unassigned | Overlap (VC_71/VC_74)          | Ref |
| MT104122 | Unassigned | Unassigned | Unassigned | Outlier                        | Ref |
| MT104467 | Unassigned | Unassigned | Unassigned | Overlap (VC_455/VC_1028)       | Ref |
| MT104474 | Unassigned | Unassigned | Unassigned | Outlier                        | Ref |
| MT114163 | Unassigned | Unassigned | Unassigned | Overlap (VC_560/VC_562)        | Ref |
| MT118296 | Unassigned | Unassigned | Unassigned | Outlier                        | Ref |
| MT121968 | Unassigned | Unassigned | Unassigned | Outlier                        | Ref |
| MT135260 | Unassigned | Unassigned | Unassigned | Outlier                        | Ref |
| MT135268 | Unassigned | Unassigned | Unassigned | Outlier                        | Ref |
| MT135270 | Unassigned | Unassigned | Unassigned | Outlier                        | Ref |
| MT135279 | Unassigned | Unassigned | Unassigned | Outlier                        | Ref |
| MT135280 | Unassigned | Unassigned | Unassigned | Outlier                        | Ref |
| MT135295 | Unassigned | Unassigned | Unassigned | Singleton                      | Ref |
| MT135300 | Unassigned | Unassigned | Unassigned | Outlier                        | Ref |
| MT135312 | Unassigned | Unassigned | Unassigned | Outlier                        | Ref |
| MT135313 | Unassigned | Unassigned | Unassigned | Singleton                      | Ref |
| MT135327 | Unassigned | Unassigned | Unassigned | Outlier                        | Ref |
| MT135341 | Unassigned | Unassigned | Unassigned | Singleton                      | Ref |
| MT135356 | Unassigned | Unassigned | Unassigned | Outlier                        | Ref |
| MT135360 | Unassigned | Unassigned | Unassigned | Singleton                      | Ref |
| MT135362 | Unassigned | Unassigned | Unassigned | Overlap (VC_1253/VC_1317)      | Ref |
| MT135364 | Unassigned | Unassigned | Unassigned | Singleton                      | Ref |
| MT135386 | Unassigned | Unassigned | Unassigned | Singleton                      | Ref |



|          |            |            |            |                                           |     |
|----------|------------|------------|------------|-------------------------------------------|-----|
| MT135390 | Unassigned | Unassigned | Unassigned | Outlier                                   | Ref |
| MT135398 | Unassigned | Unassigned | Unassigned | Overlap (VC_1253/VC_1317)                 | Ref |
| MT135417 | Unassigned | Unassigned | Unassigned | Outlier                                   | Ref |
| MT135428 | Unassigned | Unassigned | Unassigned | Singleton                                 | Ref |
| MT135442 | Unassigned | Unassigned | Unassigned | Singleton                                 | Ref |
| MT135448 | Unassigned | Unassigned | Unassigned | Overlap (VC_1287/VC_1290)                 | Ref |
| MT135449 | Unassigned | Unassigned | Unassigned | Singleton                                 | Ref |
| MT135450 | Unassigned | Unassigned | Unassigned | Outlier                                   | Ref |
| MT135452 | Unassigned | Unassigned | Unassigned | Outlier                                   | Ref |
| MT135464 | Unassigned | Unassigned | Unassigned | Singleton                                 | Ref |
| MT151386 | Unassigned | Unassigned | Unassigned | Outlier                                   | Ref |
| MT161385 | Unassigned | Unassigned | Unassigned | Outlier                                   | Ref |
| MT161386 | Unassigned | Unassigned | Unassigned | Overlap (VC_538/VC_619)                   | Ref |
| MT161387 | Unassigned | Unassigned | Unassigned | Overlap (VC_538/VC_619)                   | Ref |
| MT161459 | Unassigned | Unassigned | Unassigned | Overlap (VC_444/VC_580)                   | Ref |
| MT162468 | Unassigned | Unassigned | Unassigned | Overlap (VC_435/VC_656)                   | Ref |
| MT176427 | Unassigned | Unassigned | Unassigned | Overlap (VC_458/VC_586)                   | Ref |
| MT185428 | Unassigned | Unassigned | Unassigned | Overlap (VC_1056/VC_1057/VC_1061/VC_1151) | Ref |
| MT188704 | Unassigned | Unassigned | Unassigned | Outlier                                   | Ref |
| MT192033 | Unassigned | Unassigned | Unassigned | Outlier                                   | Ref |
| MT210152 | Unassigned | Unassigned | Unassigned | Outlier                                   | Ref |
| MT225100 | Unassigned | Unassigned | Unassigned | Overlap (VC_42/VC_57)                     | Ref |
| MT225101 | Unassigned | Unassigned | Unassigned | Outlier                                   | Ref |
| MT233525 | Unassigned | Unassigned | Unassigned | Outlier                                   | Ref |
| MT259468 | Unassigned | Unassigned | Unassigned | Outlier                                   | Ref |
| MT303952 | Unassigned | Unassigned | Unassigned | Overlap (VC_633/VC_634)                   | Ref |
| MT310857 | Unassigned | Unassigned | Unassigned | Overlap (VC_227/VC_941)                   | Ref |
| MT310862 | Unassigned | Unassigned | Unassigned | Overlap (VC_983/VC_984)                   | Ref |
| MT310894 | Unassigned | Unassigned | Unassigned | Overlap (VC_1172/VC_1173)                 | Ref |
| MT311967 | Unassigned | Unassigned | Unassigned | Overlap (VC_633/VC_634)                   | Ref |
| MT311968 | Unassigned | Unassigned | Unassigned | Overlap (VC_633/VC_634)                   | Ref |
| MT330372 | Unassigned | Unassigned | Unassigned | Outlier                                   | Ref |
| MT345684 | Unassigned | Unassigned | Unassigned | Outlier                                   | Ref |
| MT349887 | Unassigned | Unassigned | Unassigned | Outlier                                   | Ref |
| MT360682 | Unassigned | Unassigned | Unassigned | Outlier                                   | Ref |
| MT362618 | Unassigned | Unassigned | Unassigned | Outlier                                   | Ref |
| MT375522 | Unassigned | Unassigned | Unassigned | Outlier                                   | Ref |
| MT375523 | Unassigned | Unassigned | Unassigned | Overlap (VC_481/VC_482)                   | Ref |
| MT375524 | Unassigned | Unassigned | Unassigned | Overlap (VC_481/VC_482)                   | Ref |
| MT410774 | Unassigned | Unassigned | Unassigned | Outlier                                   | Ref |
| MT416612 | Unassigned | Unassigned | Unassigned | Overlap (VC_87/VC_88)                     | Ref |
| MT446395 | Unassigned | Unassigned | Unassigned | Overlap (VC_458/VC_586)                   | Ref |
| MT446401 | Unassigned | Unassigned | Unassigned | Overlap (VC_458/VC_586)                   | Ref |
| MT446404 | Unassigned | Unassigned | Unassigned | Overlap (VC_458/VC_586)                   | Ref |
| MT448615 | Unassigned | Unassigned | Unassigned | Outlier                                   | Ref |
| MT451980 | Unassigned | Unassigned | Unassigned | Overlap (VC_728/VC_730)                   | Ref |
| MT451981 | Unassigned | Unassigned | Unassigned | Overlap (VC_728/VC_730)                   | Ref |
| MT451982 | Unassigned | Unassigned | Unassigned | Overlap (VC_728/VC_730)                   | Ref |
| MT451983 | Unassigned | Unassigned | Unassigned | Overlap (VC_1164/VC_1243)                 | Ref |
| MT451984 | Unassigned | Unassigned | Unassigned | Overlap (VC_1164/VC_1243)                 | Ref |
| MT498043 | Unassigned | Unassigned | Unassigned | Outlier                                   | Ref |
| MT498058 | Unassigned | Unassigned | Unassigned | Outlier                                   | Ref |
| MT498062 | Unassigned | Unassigned | Unassigned | Overlap (VC_1241/VC_1242)                 | Ref |
| MT498063 | Unassigned | Unassigned | Unassigned | Overlap (VC_1164/VC_1243)                 | Ref |
| MT500539 | Unassigned | Unassigned | Unassigned | Outlier                                   | Ref |
| MT521991 | Unassigned | Unassigned | Unassigned | Overlap (VC_728/VC_730)                   | Ref |
| MT521992 | Unassigned | Unassigned | Unassigned | Outlier                                   | Ref |
| MT521993 | Unassigned | Unassigned | Unassigned | Overlap (VC_560/VC_561/VC_562/VC_563)     | Ref |
| MT522000 | Unassigned | Unassigned | Unassigned | Overlap (VC_521/VC_524)                   | Ref |
| MT553342 | Unassigned | Unassigned | Unassigned | Overlap (VC_1172/VC_1173)                 | Ref |
| MT553347 | Unassigned | Unassigned | Unassigned | Overlap (VC_521/VC_550)                   | Ref |
| MT584811 | Unassigned | Unassigned | Unassigned | Outlier                                   | Ref |
| MT596497 | Unassigned | Unassigned | Unassigned | Overlap (VC_13/VC_70)                     | Ref |
| MT596498 | Unassigned | Unassigned | Unassigned | Overlap (VC_13/VC_70)                     | Ref |
| MT596500 | Unassigned | Unassigned | Unassigned | Overlap (VC_97/VC_99)                     | Ref |
| MT597419 | Unassigned | Unassigned | Unassigned | Outlier                                   | Ref |
| MT647606 | Unassigned | Unassigned | Unassigned | Outlier                                   | Ref |
| MT663720 | Unassigned | Unassigned | Unassigned | Outlier                                   | Ref |
| MT664721 | Unassigned | Unassigned | Unassigned | Outlier                                   | Ref |
| MT679222 | Unassigned | Unassigned | Unassigned | Overlap (VC_194/VC_195)                   | Ref |
| MT679223 | Unassigned | Unassigned | Unassigned | Overlap (VC_194/VC_195)                   | Ref |
| MT700412 | Unassigned | Unassigned | Unassigned | Outlier                                   | Ref |
| MT701590 | Unassigned | Unassigned | Unassigned | Overlap (VC_442/VC_443)                   | Ref |
| MT711370 | Unassigned | Unassigned | Unassigned | Singleton                                 | Ref |
| MT711977 | Unassigned | Unassigned | Unassigned | Singleton                                 | Ref |
| MT724048 | Unassigned | Unassigned | Unassigned | Outlier                                   | Ref |
| MT732457 | Unassigned | Unassigned | Unassigned | Outlier                                   | Ref |
| MT732473 | Unassigned | Unassigned | Unassigned | Outlier                                   | Ref |
| MT732474 | Unassigned | Unassigned | Unassigned | Outlier                                   | Ref |
| MT732475 | Unassigned | Unassigned | Unassigned | Outlier                                   | Ref |
| MT735630 | Unassigned | Unassigned | Unassigned | Overlap (VC_905/VC_907)                   | Ref |



|           |            |            |            |                                |     |
|-----------|------------|------------|------------|--------------------------------|-----|
| MT740245  | Unassigned | Unassigned | Unassigned | Overlap (VC_194/VC_195)        | Ref |
| MT740307  | Unassigned | Unassigned | Unassigned | Outlier                        | Ref |
| MT740315  | Unassigned | Unassigned | Unassigned | Outlier                        | Ref |
| MT740725  | Unassigned | Unassigned | Unassigned | Overlap (VC_365/VC_371)        | Ref |
| MT740729  | Unassigned | Unassigned | Unassigned | Overlap (VC_365/VC_371)        | Ref |
| MT740735  | Unassigned | Unassigned | Unassigned | Overlap (VC_365/VC_371)        | Ref |
| MT740744  | Unassigned | Unassigned | Unassigned | Overlap (VC_365/VC_371)        | Ref |
| MT740746  | Unassigned | Unassigned | Unassigned | Overlap (VC_365/VC_371)        | Ref |
| MT740747  | Unassigned | Unassigned | Unassigned | Overlap (VC_365/VC_371)        | Ref |
| MT740748  | Unassigned | Unassigned | Unassigned | Overlap (VC_83/VC_85)          | Ref |
| MT747435  | Unassigned | Unassigned | Unassigned | Overlap (VC_431/VC_742)        | Ref |
| MT764845  | Unassigned | Unassigned | Unassigned | Outlier                        | Ref |
| MT771343  | Unassigned | Unassigned | Unassigned | Outlier                        | Ref |
| MT771346  | Unassigned | Unassigned | Unassigned | Overlap (VC_526/VC_554)        | Ref |
| MT774377  | Unassigned | Unassigned | Unassigned | Overlap (VC_674/VC_675)        | Ref |
| MT774402  | Unassigned | Unassigned | Unassigned | Overlap (VC_503/VC_504/VC_505) | Ref |
| MT774406  | Unassigned | Unassigned | Unassigned | Overlap (VC_503/VC_504/VC_505) | Ref |
| MT774408  | Unassigned | Unassigned | Unassigned | Overlap (VC_503/VC_505)        | Ref |
| MT774409  | Unassigned | Unassigned | Unassigned | Overlap (VC_503/VC_505)        | Ref |
| MT774410  | Unassigned | Unassigned | Unassigned | Overlap (VC_503/VC_505)        | Ref |
| MT774411  | Unassigned | Unassigned | Unassigned | Overlap (VC_503/VC_505)        | Ref |
| MT783706  | Unassigned | Unassigned | Unassigned | Outlier                        | Ref |
| MT806187  | Unassigned | Unassigned | Unassigned | Outlier                        | Ref |
| MT843276  | Unassigned | Unassigned | Unassigned | Outlier                        | Ref |
| MT855965  | Unassigned | Unassigned | Unassigned | Singleton                      | Ref |
| MT872956  | Unassigned | Unassigned | Unassigned | Outlier                        | Ref |
| MT880870  | Unassigned | Unassigned | Unassigned | Outlier                        | Ref |
| MT880871  | Unassigned | Unassigned | Unassigned | Outlier                        | Ref |
| MT889377  | Unassigned | Unassigned | Unassigned | Overlap (VC_1164/VC_1243)      | Ref |
| MT889380  | Unassigned | Unassigned | Unassigned | Overlap (VC_521/VC_549)        | Ref |
| MT889387  | Unassigned | Unassigned | Unassigned | Outlier                        | Ref |
| MT901797  | Unassigned | Unassigned | Unassigned | Overlap (VC_62/VC_63)          | Ref |
| MT901798  | Unassigned | Unassigned | Unassigned | Overlap (VC_62/VC_63)          | Ref |
| MT901799  | Unassigned | Unassigned | Unassigned | Overlap (VC_62/VC_63)          | Ref |
| MT901800  | Unassigned | Unassigned | Unassigned | Overlap (VC_62/VC_63)          | Ref |
| MT939240  | Unassigned | Unassigned | Unassigned | Outlier                        | Ref |
| MT939242  | Unassigned | Unassigned | Unassigned | Overlap (VC_695/VC_696)        | Ref |
| MT939492  | Unassigned | Unassigned | Unassigned | Outlier                        | Ref |
| MT951568  | Unassigned | Unassigned | Unassigned | Overlap (VC_75/VC_115)         | Ref |
| MT952843  | Unassigned | Unassigned | Unassigned | Overlap (VC_1095/VC_1096)      | Ref |
| MW0009675 | Unassigned | Unassigned | Unassigned | Overlap (VC_355/VC_618)        | Ref |
| MW021759  | Unassigned | Unassigned | Unassigned | Overlap (VC_82/VC_619)         | Ref |
| MW021761  | Unassigned | Unassigned | Unassigned | Overlap (VC_1347/VC_1348)      | Ref |
| MW021767  | Unassigned | Unassigned | Unassigned | Overlap (VC_1347/VC_1348)      | Ref |
| MW055913  | Unassigned | Unassigned | Unassigned | Outlier                        | Ref |
| MW057856  | Unassigned | Unassigned | Unassigned | Outlier                        | Ref |
| MW057861  | Unassigned | Unassigned | Unassigned | Outlier                        | Ref |
| MW057862  | Unassigned | Unassigned | Unassigned | Outlier                        | Ref |
| MW082583  | Unassigned | Unassigned | Unassigned | Outlier                        | Ref |
| MW082584  | Unassigned | Unassigned | Unassigned | Outlier                        | Ref |
| MW091528  | Unassigned | Unassigned | Unassigned | Outlier                        | Ref |
| MW117965  | Unassigned | Unassigned | Unassigned | Outlier                        | Ref |
| MW145136  | Unassigned | Unassigned | Unassigned | Overlap (VC_71/VC_74)          | Ref |
| MW145137  | Unassigned | Unassigned | Unassigned | Outlier                        | Ref |
| MW145138  | Unassigned | Unassigned | Unassigned | Overlap (VC_463/VC_609)        | Ref |
| MW151244  | Unassigned | Unassigned | Unassigned | Overlap (VC_750/VC_751)        | Ref |
| MW202423  | Unassigned | Unassigned | Unassigned | Singleton                      | Ref |
| MW202426  | Unassigned | Unassigned | Unassigned | Singleton                      | Ref |
| MW202444  | Unassigned | Unassigned | Unassigned | Singleton                      | Ref |
| MW202458  | Unassigned | Unassigned | Unassigned | Singleton                      | Ref |
| MW202476  | Unassigned | Unassigned | Unassigned | Singleton                      | Ref |
| MW202477  | Unassigned | Unassigned | Unassigned | Outlier                        | Ref |
| MW202481  | Unassigned | Unassigned | Unassigned | Outlier                        | Ref |
| MW202482  | Unassigned | Unassigned | Unassigned | Singleton                      | Ref |
| MW202483  | Unassigned | Unassigned | Unassigned | Outlier                        | Ref |
| MW202484  | Unassigned | Unassigned | Unassigned | Singleton                      | Ref |
| MW202485  | Unassigned | Unassigned | Unassigned | Outlier                        | Ref |
| MW202491  | Unassigned | Unassigned | Unassigned | Outlier                        | Ref |
| MW202497  | Unassigned | Unassigned | Unassigned | Singleton                      | Ref |
| MW202510  | Unassigned | Unassigned | Unassigned | Outlier                        | Ref |
| MW202512  | Unassigned | Unassigned | Unassigned | Outlier                        | Ref |
| MW202554  | Unassigned | Unassigned | Unassigned | Singleton                      | Ref |
| MW202558  | Unassigned | Unassigned | Unassigned | Outlier                        | Ref |
| MW202561  | Unassigned | Unassigned | Unassigned | Outlier                        | Ref |
| MW202567  | Unassigned | Unassigned | Unassigned | Overlap (VC_199/VC_399/VC_400) | Ref |
| MW202568  | Unassigned | Unassigned | Unassigned | Singleton                      | Ref |
| MW202573  | Unassigned | Unassigned | Unassigned | Outlier                        | Ref |
| MW202575  | Unassigned | Unassigned | Unassigned | Overlap (VC_199/VC_401)        | Ref |
| MW202577  | Unassigned | Unassigned | Unassigned | Singleton                      | Ref |
| MW202590  | Unassigned | Unassigned | Unassigned | Overlap (VC_996/VC_1065)       | Ref |
| MW202597  | Unassigned | Unassigned | Unassigned | Overlap (VC_995/VC_996)        | Ref |



|          |            |            |            |                                |     |
|----------|------------|------------|------------|--------------------------------|-----|
| MW202600 | Unassigned | Unassigned | Unassigned | Overlap (VC_996/VC_1065)       | Ref |
| MW202615 | Unassigned | Unassigned | Unassigned | Outlier                        | Ref |
| MW202621 | Unassigned | Unassigned | Unassigned | Outlier                        | Ref |
| MW202627 | Unassigned | Unassigned | Unassigned | Singleton                      | Ref |
| MW202640 | Unassigned | Unassigned | Unassigned | Overlap (VC_279/VC_529)        | Ref |
| MW202647 | Unassigned | Unassigned | Unassigned | Singleton                      | Ref |
| MW202675 | Unassigned | Unassigned | Unassigned | Outlier                        | Ref |
| MW202679 | Unassigned | Unassigned | Unassigned | Outlier                        | Ref |
| MW202691 | Unassigned | Unassigned | Unassigned | Outlier                        | Ref |
| MW202692 | Unassigned | Unassigned | Unassigned | Singleton                      | Ref |
| MW202693 | Unassigned | Unassigned | Unassigned | Outlier                        | Ref |
| MW202694 | Unassigned | Unassigned | Unassigned | Singleton                      | Ref |
| MW202697 | Unassigned | Unassigned | Unassigned | Outlier                        | Ref |
| MW202698 | Unassigned | Unassigned | Unassigned | Overlap (VC_199/VC_399)        | Ref |
| MW202701 | Unassigned | Unassigned | Unassigned | Outlier                        | Ref |
| MW202710 | Unassigned | Unassigned | Unassigned | Outlier                        | Ref |
| MW202713 | Unassigned | Unassigned | Unassigned | Outlier                        | Ref |
| MW202722 | Unassigned | Unassigned | Unassigned | Overlap (VC_279/VC_529)        | Ref |
| MW202733 | Unassigned | Unassigned | Unassigned | Outlier                        | Ref |
| MW202768 | Unassigned | Unassigned | Unassigned | Overlap (VC_199/VC_401)        | Ref |
| MW202779 | Unassigned | Unassigned | Unassigned | Overlap (VC_199/VC_399/VC_400) | Ref |
| MW202783 | Unassigned | Unassigned | Unassigned | Singleton                      | Ref |
| MW202795 | Unassigned | Unassigned | Unassigned | Outlier                        | Ref |
| MW202801 | Unassigned | Unassigned | Unassigned | Singleton                      | Ref |
| MW202803 | Unassigned | Unassigned | Unassigned | Singleton                      | Ref |
| MW202816 | Unassigned | Unassigned | Unassigned | Outlier                        | Ref |
| MW202828 | Unassigned | Unassigned | Unassigned | Outlier                        | Ref |
| MW202869 | Unassigned | Unassigned | Unassigned | Outlier                        | Ref |
| MW202882 | Unassigned | Unassigned | Unassigned | Singleton                      | Ref |
| MW202893 | Unassigned | Unassigned | Unassigned | Overlap (VC_199/VC_399)        | Ref |
| MW202897 | Unassigned | Unassigned | Unassigned | Outlier                        | Ref |
| MW202898 | Unassigned | Unassigned | Unassigned | Outlier                        | Ref |
| MW221967 | Unassigned | Unassigned | Unassigned | Outlier                        | Ref |
| MW239124 | Unassigned | Unassigned | Unassigned | Overlap (VC_286/VC_290/VC_491) | Ref |
| MW247143 | Unassigned | Unassigned | Unassigned | Outlier                        | Ref |
| MW247146 | Unassigned | Unassigned | Unassigned | Outlier                        | Ref |
| MW258712 | Unassigned | Unassigned | Unassigned | Outlier                        | Ref |
| MW273921 | Unassigned | Unassigned | Unassigned | Outlier                        | Ref |
| MW286266 | Unassigned | Unassigned | Unassigned | Overlap (VC_155/VC_159)        | Ref |
| MW286267 | Unassigned | Unassigned | Unassigned | Overlap (VC_155/VC_159)        | Ref |
| MW286268 | Unassigned | Unassigned | Unassigned | Overlap (VC_155/VC_159)        | Ref |
| MW291017 | Unassigned | Unassigned | Unassigned | Outlier                        | Ref |
| MW291508 | Unassigned | Unassigned | Unassigned | Outlier                        | Ref |
| MW314849 | Unassigned | Unassigned | Unassigned | Overlap (VC_1095/VC_1096)      | Ref |
| MW314850 | Unassigned | Unassigned | Unassigned | Outlier                        | Ref |
| MW317014 | Unassigned | Unassigned | Unassigned | Outlier                        | Ref |
| MW325771 | Unassigned | Unassigned | Unassigned | Overlap (VC_286/VC_290/VC_491) | Ref |
| MW334946 | Unassigned | Unassigned | Unassigned | Outlier                        | Ref |
| MW344869 | Unassigned | Unassigned | Unassigned | Overlap (VC_286/VC_290/VC_491) | Ref |
| MW358880 | Unassigned | Unassigned | Unassigned | Outlier                        | Ref |
| MW358929 | Unassigned | Unassigned | Unassigned | Outlier                        | Ref |
| MW364971 | Unassigned | Unassigned | Unassigned | Overlap (VC_13/VC_70)          | Ref |
| MW364972 | Unassigned | Unassigned | Unassigned | Overlap (VC_13/VC_70)          | Ref |
| MW364973 | Unassigned | Unassigned | Unassigned | Overlap (VC_13/VC_70)          | Ref |
| MW364974 | Unassigned | Unassigned | Unassigned | Overlap (VC_13/VC_70)          | Ref |
| MW364975 | Unassigned | Unassigned | Unassigned | Overlap (VC_13/VC_70)          | Ref |
| MW394388 | Unassigned | Unassigned | Unassigned | Overlap (VC_841/VC_842)        | Ref |
| MW394390 | Unassigned | Unassigned | Unassigned | Outlier                        | Ref |
| MW394467 | Unassigned | Unassigned | Unassigned | Overlap (VC_101/VC_106)        | Ref |
| MW419775 | Unassigned | Unassigned | Unassigned | Overlap (VC_818/VC_821)        | Ref |
| MW423737 | Unassigned | Unassigned | Unassigned | Outlier                        | Ref |
| MW423738 | Unassigned | Unassigned | Unassigned | Outlier                        | Ref |
| MW423739 | Unassigned | Unassigned | Unassigned | Outlier                        | Ref |
| MW451249 | Unassigned | Unassigned | Unassigned | Overlap (VC_615/VC_754)        | Ref |
| MW460247 | Unassigned | Unassigned | Unassigned | Outlier                        | Ref |
| MW460249 | Unassigned | Unassigned | Unassigned | Outlier                        | Ref |
| MW464860 | Unassigned | Unassigned | Unassigned | Outlier                        | Ref |
| MW476490 | Unassigned | Unassigned | Unassigned | Outlier                        | Ref |
| MW478290 | Unassigned | Unassigned | Unassigned | Overlap (VC_20/VC_542)         | Ref |
| MW478291 | Unassigned | Unassigned | Unassigned | Outlier                        | Ref |
| MW495044 | Unassigned | Unassigned | Unassigned | Overlap (VC_841/VC_842)        | Ref |
| MW512570 | Unassigned | Unassigned | Unassigned | Outlier                        | Ref |
| MW512573 | Unassigned | Unassigned | Unassigned | Overlap (VC_140/VC_649)        | Ref |
| MW526258 | Unassigned | Unassigned | Unassigned | Outlier                        | Ref |
| MW560978 | Unassigned | Unassigned | Unassigned | Outlier                        | Ref |
| MW570730 | Unassigned | Unassigned | Unassigned | Outlier                        | Ref |
| MW582532 | Unassigned | Unassigned | Unassigned | Outlier                        | Ref |
| MW584153 | Unassigned | Unassigned | Unassigned | Outlier                        | Ref |
| MW584166 | Unassigned | Unassigned | Unassigned | Overlap (VC_512/VC_513)        | Ref |
| MW584167 | Unassigned | Unassigned | Unassigned | Outlier                        | Ref |
| MW584174 | Unassigned | Unassigned | Unassigned | Overlap (VC_512/VC_513)        | Ref |



|           |            |            |            |                                           |     |
|-----------|------------|------------|------------|-------------------------------------------|-----|
| MW584177  | Unassigned | Unassigned | Unassigned | Overlap (VC_553/VC_959)                   | Ref |
| MW584183  | Unassigned | Unassigned | Unassigned | Overlap (VC_553/VC_959)                   | Ref |
| MW584185  | Unassigned | Unassigned | Unassigned | Outlier                                   | Ref |
| MW584186  | Unassigned | Unassigned | Unassigned | Overlap (VC_553/VC_959)                   | Ref |
| MW584187  | Unassigned | Unassigned | Unassigned | Outlier                                   | Ref |
| MW584195  | Unassigned | Unassigned | Unassigned | Outlier                                   | Ref |
| MW584211  | Unassigned | Unassigned | Unassigned | Outlier                                   | Ref |
| MW589261  | Unassigned | Unassigned | Unassigned | Overlap (VC_668/VC_694)                   | Ref |
| MW671054  | Unassigned | Unassigned | Unassigned | Overlap (VC_83/VC_85)                     | Ref |
| MW712725  | Unassigned | Unassigned | Unassigned | Overlap (VC_1095/VC_1096)                 | Ref |
| MW735835  | Unassigned | Unassigned | Unassigned | Outlier                                   | Ref |
| MW749006  | Unassigned | Unassigned | Unassigned | Outlier                                   | Ref |
| MW749008  | Unassigned | Unassigned | Unassigned | Outlier                                   | Ref |
| MW749009  | Unassigned | Unassigned | Unassigned | Outlier                                   | Ref |
| MW788655  | Unassigned | Unassigned | Unassigned | Singleton                                 | Ref |
| MW788656  | Unassigned | Unassigned | Unassigned | Outlier                                   | Ref |
| MW805363  | Unassigned | Unassigned | Unassigned | Outlier                                   | Ref |
| MW805364  | Unassigned | Unassigned | Unassigned | Outlier                                   | Ref |
| MW824390  | Unassigned | Unassigned | Unassigned | Overlap (VC_45/VC_47)                     | Ref |
| MW824410  | Unassigned | Unassigned | Unassigned | Overlap (VC_1042/VC_1043)                 | Ref |
| MW824411  | Unassigned | Unassigned | Unassigned | Overlap (VC_1042/VC_1043)                 | Ref |
| MW825358  | Unassigned | Unassigned | Unassigned | Outlier                                   | Ref |
| MW831865  | Unassigned | Unassigned | Unassigned | Overlap (VC_75/VC_115)                    | Ref |
| MW862989  | Unassigned | Unassigned | Unassigned | Overlap (VC_521/VC_548)                   | Ref |
| MW865293  | Unassigned | Unassigned | Unassigned | Outlier                                   | Ref |
| MW865327  | Unassigned | Unassigned | Unassigned | Outlier                                   | Ref |
| MW865341  | Unassigned | Unassigned | Unassigned | Outlier                                   | Ref |
| MW879341  | Unassigned | Unassigned | Unassigned | Outlier                                   | Ref |
| MW924641  | Unassigned | Unassigned | Unassigned | Overlap (VC_1172/VC_1173)                 | Ref |
| MW927512  | Unassigned | Unassigned | Unassigned | Overlap (VC_709/VC_713)                   | Ref |
| MW927518  | Unassigned | Unassigned | Unassigned | Overlap (VC_709/VC_713)                   | Ref |
| MW929183  | Unassigned | Unassigned | Unassigned | Outlier                                   | Ref |
| MW960033  | Unassigned | Unassigned | Unassigned | Outlier                                   | Ref |
| MW960037  | Unassigned | Unassigned | Unassigned | Outlier                                   | Ref |
| MW960043  | Unassigned | Unassigned | Unassigned | Overlap (VC_75/VC_115)                    | Ref |
| MW965453  | Unassigned | Unassigned | Unassigned | Overlap (VC_71/VC_72)                     | Ref |
| MW980061  | Unassigned | Unassigned | Unassigned | Outlier                                   | Ref |
| MW980066  | Unassigned | Unassigned | Unassigned | Overlap (VC_784/VC_786)                   | Ref |
| MW980071  | Unassigned | Unassigned | Unassigned | Overlap (VC_784/VC_786)                   | Ref |
| MW980072  | Unassigned | Unassigned | Unassigned | Overlap (VC_784/VC_786)                   | Ref |
| MZ005681  | Unassigned | Unassigned | Unassigned | Overlap (VC_1241/VC_1242)                 | Ref |
| MZ028627  | Unassigned | Unassigned | Unassigned | Outlier                                   | Ref |
| MZ073369  | Unassigned | Unassigned | Unassigned | Outlier                                   | Ref |
| MZ089730  | Unassigned | Unassigned | Unassigned | Outlier                                   | Ref |
| MZ089736  | Unassigned | Unassigned | Unassigned | Outlier                                   | Ref |
| MZ089737  | Unassigned | Unassigned | Unassigned | Overlap (VC_463/VC_609)                   | Ref |
| MZ089749  | Unassigned | Unassigned | Unassigned | Overlap (VC_1119/VC_1121/VC_1321)         | Ref |
| MZ089750  | Unassigned | Unassigned | Unassigned | Overlap (VC_1056/VC_1057/VC_1061/VC_1151) | Ref |
| MZ089751  | Unassigned | Unassigned | Unassigned | Singleton                                 | Ref |
| MZ089753  | Unassigned | Unassigned | Unassigned | Overlap (VC_1119/VC_1121)                 | Ref |
| MZ089754  | Unassigned | Unassigned | Unassigned | Overlap (VC_1119/VC_1121/VC_1321)         | Ref |
| MZ089757  | Unassigned | Unassigned | Unassigned | Overlap (VC_1120/VC_1121)                 | Ref |
| MZ089758  | Unassigned | Unassigned | Unassigned | Singleton                                 | Ref |
| MZ089760  | Unassigned | Unassigned | Unassigned | Singleton                                 | Ref |
| MZ089762  | Unassigned | Unassigned | Unassigned | Overlap (VC_1119/VC_1321)                 | Ref |
| MZ089763  | Unassigned | Unassigned | Unassigned | Singleton                                 | Ref |
| MZ089766  | Unassigned | Unassigned | Unassigned | Outlier                                   | Ref |
| MZ089776  | Unassigned | Unassigned | Unassigned | Outlier                                   | Ref |
| MZ089779  | Unassigned | Unassigned | Unassigned | Overlap (VC_1114/VC_1136/VC_1318)         | Ref |
| MZ089781  | Unassigned | Unassigned | Unassigned | Singleton                                 | Ref |
| MZ089782  | Unassigned | Unassigned | Unassigned | Singleton                                 | Ref |
| MZ089784  | Unassigned | Unassigned | Unassigned | Outlier                                   | Ref |
| MZ089793  | Unassigned | Unassigned | Unassigned | Outlier                                   | Ref |
| MZ089810  | Unassigned | Unassigned | Unassigned | Singleton                                 | Ref |
| MZ099574  | Unassigned | Unassigned | Unassigned | Singleton                                 | Ref |
| MZ127829  | Unassigned | Unassigned | Unassigned | Outlier                                   | Ref |
| MZ150787  | Unassigned | Unassigned | Unassigned | Overlap (VC_1164/VC_1243)                 | Ref |
| MZ150789  | Unassigned | Unassigned | Unassigned | Outlier                                   | Ref |
| MZ152915  | Unassigned | Unassigned | Unassigned | Overlap (VC_97/VC_99)                     | Ref |
| MZ171369  | Unassigned | Unassigned | Unassigned | Outlier                                   | Ref |
| MZ171379  | Unassigned | Unassigned | Unassigned | Overlap (VC_1241/VC_1242)                 | Ref |
| MZ188970  | Unassigned | Unassigned | Unassigned | Outlier                                   | Ref |
| MZ220765  | Unassigned | Unassigned | Unassigned | Overlap (VC_121/VC_124)                   | Ref |
| MZ2274310 | Unassigned | Unassigned | Unassigned | Outlier                                   | Ref |
| MZ308445  | Unassigned | Unassigned | Unassigned | Overlap (VC_257/VC_262)                   | Ref |
| MZ322005  | Unassigned | Unassigned | Unassigned | Overlap (VC_227/VC_941)                   | Ref |
| MZ326854  | Unassigned | Unassigned | Unassigned | Overlap (VC_75/VC_115)                    | Ref |
| MZ326858  | Unassigned | Unassigned | Unassigned | Overlap (VC_75/VC_115)                    | Ref |
| MZ326860  | Unassigned | Unassigned | Unassigned | Outlier                                   | Ref |
| MZ326867  | Unassigned | Unassigned | Unassigned | Outlier                                   | Ref |
| MZ333131  | Unassigned | Unassigned | Unassigned | Outlier                                   | Ref |



|          |            |            |            |                           |     |
|----------|------------|------------|------------|---------------------------|-----|
| MZ333132 | Unassigned | Unassigned | Unassigned | Outlier                   | Ref |
| MZ333133 | Unassigned | Unassigned | Unassigned | Outlier                   | Ref |
| MZ333456 | Unassigned | Unassigned | Unassigned | Overlap (VC_268/VC_864)   | Ref |
| MZ333458 | Unassigned | Unassigned | Unassigned | Overlap (VC_268/VC_864)   | Ref |
| MZ334521 | Unassigned | Unassigned | Unassigned | Outlier                   | Ref |
| MZ334522 | Unassigned | Unassigned | Unassigned | Outlier                   | Ref |
| MZ334528 | Unassigned | Unassigned | Unassigned | Outlier                   | Ref |
| MZ343158 | Unassigned | Unassigned | Unassigned | Overlap (VC_524/VC_546)   | Ref |
| MZ348424 | Unassigned | Unassigned | Unassigned | Overlap (VC_286/VC_491)   | Ref |
| MZ355727 | Unassigned | Unassigned | Unassigned | Overlap (VC_1164/VC_1243) | Ref |
| MZ357096 | Unassigned | Unassigned | Unassigned | Outlier                   | Ref |
| MZ364229 | Unassigned | Unassigned | Unassigned | Overlap (VC_1151/VC_1433) | Ref |
| MZ364230 | Unassigned | Unassigned | Unassigned | Overlap (VC_406/VC_1250)  | Ref |
| MZ364237 | Unassigned | Unassigned | Unassigned | Outlier                   | Ref |
| MZ364253 | Unassigned | Unassigned | Unassigned | Outlier                   | Ref |
| MZ364281 | Unassigned | Unassigned | Unassigned | Overlap (VC_1067/VC_1068) | Ref |
| MZ364287 | Unassigned | Unassigned | Unassigned | Outlier                   | Ref |
| MZ364288 | Unassigned | Unassigned | Unassigned | Overlap (VC_1151/VC_1433) | Ref |
| MZ364290 | Unassigned | Unassigned | Unassigned | Singleton                 | Ref |
| MZ364292 | Unassigned | Unassigned | Unassigned | Outlier                   | Ref |
| MZ388555 | Unassigned | Unassigned | Unassigned | Overlap (VC_521/VC_548)   | Ref |
| MZ417316 | Unassigned | Unassigned | Unassigned | Overlap (VC_152/VC_153)   | Ref |
| MZ417317 | Unassigned | Unassigned | Unassigned | Overlap (VC_152/VC_153)   | Ref |
| MZ417318 | Unassigned | Unassigned | Unassigned | Overlap (VC_152/VC_153)   | Ref |
| MZ417324 | Unassigned | Unassigned | Unassigned | Overlap (VC_152/VC_153)   | Ref |
| MZ417333 | Unassigned | Unassigned | Unassigned | Overlap (VC_152/VC_153)   | Ref |
| MZ417334 | Unassigned | Unassigned | Unassigned | Overlap (VC_152/VC_153)   | Ref |
| MZ417335 | Unassigned | Unassigned | Unassigned | Overlap (VC_152/VC_153)   | Ref |
| MZ417338 | Unassigned | Unassigned | Unassigned | Overlap (VC_668/VC_694)   | Ref |
| MZ417341 | Unassigned | Unassigned | Unassigned | Overlap (VC_668/VC_694)   | Ref |
| MZ417342 | Unassigned | Unassigned | Unassigned | Overlap (VC_668/VC_694)   | Ref |
| MZ417349 | Unassigned | Unassigned | Unassigned | Overlap (VC_13/VC_70)     | Ref |
| MZ417351 | Unassigned | Unassigned | Unassigned | Overlap (VC_13/VC_70)     | Ref |
| MZ417352 | Unassigned | Unassigned | Unassigned | Overlap (VC_13/VC_70)     | Ref |
| MZ417353 | Unassigned | Unassigned | Unassigned | Overlap (VC_13/VC_70)     | Ref |
| MZ422438 | Unassigned | Unassigned | Unassigned | Outlier                   | Ref |
| MZ428230 | Unassigned | Unassigned | Unassigned | Outlier                   | Ref |
| MZ436628 | Unassigned | Unassigned | Unassigned | Outlier                   | Ref |
| MZ447858 | Unassigned | Unassigned | Unassigned | Outlier                   | Ref |
| MZ456038 | Unassigned | Unassigned | Unassigned | Overlap (VC_526/VC_554)   | Ref |
| MZ456039 | Unassigned | Unassigned | Unassigned | Overlap (VC_526/VC_554)   | Ref |
| MZ456352 | Unassigned | Unassigned | Unassigned | Outlier                   | Ref |
| MZ474490 | Unassigned | Unassigned | Unassigned | Singleton                 | Ref |
| MZ474491 | Unassigned | Unassigned | Unassigned | Outlier                   | Ref |
| MZ488273 | Unassigned | Unassigned | Unassigned | Overlap (VC_14/VC_15)     | Ref |
| MZ496292 | Unassigned | Unassigned | Unassigned | Outlier                   | Ref |
| MZ496294 | Unassigned | Unassigned | Unassigned | Outlier                   | Ref |
| MZ501264 | Unassigned | Unassigned | Unassigned | Overlap (VC_101/VC_106)   | Ref |
| MZ501271 | Unassigned | Unassigned | Unassigned | Outlier                   | Ref |
| MZ503612 | Unassigned | Unassigned | Unassigned | Outlier                   | Ref |
| MZ506873 | Unassigned | Unassigned | Unassigned | Outlier                   | Ref |
| MZ516527 | Unassigned | Unassigned | Unassigned | Outlier                   | Ref |
| MZ560703 | Unassigned | Unassigned | Unassigned | Outlier                   | Ref |
| MZ568829 | Unassigned | Unassigned | Unassigned | Outlier                   | Ref |
| MZ571829 | Unassigned | Unassigned | Unassigned | Overlap (VC_491/VC_492)   | Ref |
| MZ574429 | Unassigned | Unassigned | Unassigned | Overlap (VC_977/VC_980)   | Ref |
| MZ574430 | Unassigned | Unassigned | Unassigned | Overlap (VC_977/VC_980)   | Ref |
| MZ574431 | Unassigned | Unassigned | Unassigned | Overlap (VC_977/VC_980)   | Ref |
| MZ574432 | Unassigned | Unassigned | Unassigned | Overlap (VC_977/VC_980)   | Ref |
| MZ574433 | Unassigned | Unassigned | Unassigned | Overlap (VC_977/VC_980)   | Ref |
| MZ612110 | Unassigned | Unassigned | Unassigned | Outlier                   | Ref |
| MZ614453 | Unassigned | Unassigned | Unassigned | Outlier                   | Ref |
| MZ622174 | Unassigned | Unassigned | Unassigned | Overlap (VC_521/VC_549)   | Ref |
| MZ622175 | Unassigned | Unassigned | Unassigned | Overlap (VC_1164/VC_1243) | Ref |
| MZ622713 | Unassigned | Unassigned | Unassigned | Overlap (VC_442/VC_443)   | Ref |
| MZ634347 | Unassigned | Unassigned | Unassigned | Overlap (VC_491/VC_492)   | Ref |
| MZ634349 | Unassigned | Unassigned | Unassigned | Overlap (VC_491/VC_492)   | Ref |
| MZ643249 | Unassigned | Unassigned | Unassigned | Overlap (VC_932/VC_1050)  | Ref |
| MZ666130 | Unassigned | Unassigned | Unassigned | Overlap (VC_695/VC_696)   | Ref |
| MZ666939 | Unassigned | Unassigned | Unassigned | Singleton                 | Ref |
| MZ669808 | Unassigned | Unassigned | Unassigned | Outlier                   | Ref |
| MZ681514 | Unassigned | Unassigned | Unassigned | Outlier                   | Ref |
| MZ681515 | Unassigned | Unassigned | Unassigned | Overlap (VC_526/VC_554)   | Ref |
| MZ681517 | Unassigned | Unassigned | Unassigned | Overlap (VC_526/VC_554)   | Ref |
| MZ727332 | Unassigned | Unassigned | Unassigned | Singleton                 | Ref |
| MZ727334 | Unassigned | Unassigned | Unassigned | Outlier                   | Ref |
| MZ818790 | Unassigned | Unassigned | Unassigned | Singleton                 | Ref |
| MZ820084 | Unassigned | Unassigned | Unassigned | Overlap (VC_1164/VC_1243) | Ref |
| MZ820086 | Unassigned | Unassigned | Unassigned | Overlap (VC_872/VC_873)   | Ref |
| MZ826699 | Unassigned | Unassigned | Unassigned | Overlap (VC_458/VC_586)   | Ref |
| MZ851152 | Unassigned | Unassigned | Unassigned | Overlap (VC_83/VC_85)     | Ref |



|          |            |            |            |                                |     |
|----------|------------|------------|------------|--------------------------------|-----|
| MZ892993 | Unassigned | Unassigned | Unassigned | Outlier                        | Ref |
| MZ923504 | Unassigned | Unassigned | Unassigned | Outlier                        | Ref |
| MZ969012 | Unassigned | Unassigned | Unassigned | Outlier                        | Ref |
| MZ983385 | Unassigned | Unassigned | Unassigned | Overlap (VC_138/VC_146)        | Ref |
| OK018136 | Unassigned | Unassigned | Unassigned | Overlap (VC_75/VC_115)         | Ref |
| OK040780 | Unassigned | Unassigned | Unassigned | Overlap (VC_1035/VC_1039)      | Ref |
| OK040787 | Unassigned | Unassigned | Unassigned | Overlap (VC_1172/VC_1173)      | Ref |
| OK041467 | Unassigned | Unassigned | Unassigned | Outlier                        | Ref |
| OK042081 | Unassigned | Unassigned | Unassigned | Outlier                        | Ref |
| OK094664 | Unassigned | Unassigned | Unassigned | Overlap (VC_38/VC_812)         | Ref |
| OK149171 | Unassigned | Unassigned | Unassigned | Outlier                        | Ref |
| OK149216 | Unassigned | Unassigned | Unassigned | Outlier                        | Ref |
| OK169294 | Unassigned | Unassigned | Unassigned | Outlier                        | Ref |
| OK169295 | Unassigned | Unassigned | Unassigned | Outlier                        | Ref |
| OK181169 | Unassigned | Unassigned | Unassigned | Outlier                        | Ref |
| OK210076 | Unassigned | Unassigned | Unassigned | Overlap (VC_286/VC_290/VC_491) | Ref |
| OK272475 | Unassigned | Unassigned | Unassigned | Outlier                        | Ref |
| OK349507 | Unassigned | Unassigned | Unassigned | Overlap (VC_615/VC_965)        | Ref |
| OK490361 | Unassigned | Unassigned | Unassigned | Outlier                        | Ref |
| OK490409 | Unassigned | Unassigned | Unassigned | Outlier                        | Ref |
| OK490419 | Unassigned | Unassigned | Unassigned | Outlier                        | Ref |
| OK490420 | Unassigned | Unassigned | Unassigned | Outlier                        | Ref |
| OK490421 | Unassigned | Unassigned | Unassigned | Outlier                        | Ref |
| OK490462 | Unassigned | Unassigned | Unassigned | Overlap (VC_59/VC_245)         | Ref |
| OK490465 | Unassigned | Unassigned | Unassigned | Overlap (VC_59/VC_245)         | Ref |
| OK490468 | Unassigned | Unassigned | Unassigned | Overlap (VC_59/VC_245)         | Ref |
| OK490471 | Unassigned | Unassigned | Unassigned | Overlap (VC_59/VC_245)         | Ref |
| OK490474 | Unassigned | Unassigned | Unassigned | Overlap (VC_59/VC_245)         | Ref |
| OK490494 | Unassigned | Unassigned | Unassigned | Overlap (VC_75/VC_115)         | Ref |
| OK500002 | Unassigned | Unassigned | Unassigned | Outlier                        | Ref |
| OK562670 | Unassigned | Unassigned | Unassigned | Outlier                        | Ref |
| OK570185 | Unassigned | Unassigned | Unassigned | Overlap (VC_455/VC_1028)       | Ref |
| OK570374 | Unassigned | Unassigned | Unassigned | Overlap (VC_286/VC_290/VC_491) | Ref |
| OK574338 | Unassigned | Unassigned | Unassigned | Overlap (VC_97/VC_99)          | Ref |
| OK597184 | Unassigned | Unassigned | Unassigned | Outlier                        | Ref |
| OK624832 | Unassigned | Unassigned | Unassigned | Outlier                        | Ref |
| OK632026 | Unassigned | Unassigned | Unassigned | Outlier                        | Ref |
| OK665841 | Unassigned | Unassigned | Unassigned | Outlier                        | Ref |
| OL348188 | Unassigned | Unassigned | Unassigned | Outlier                        | Ref |
| OL362271 | Unassigned | Unassigned | Unassigned | Overlap (VC_455/VC_1028)       | Ref |
| OL412002 | Unassigned | Unassigned | Unassigned | Outlier                        | Ref |
| OL449681 | Unassigned | Unassigned | Unassigned | Overlap (VC_458/VC_586)        | Ref |
| OL455886 | Unassigned | Unassigned | Unassigned | Overlap (VC_728/VC_730)        | Ref |
| OL455900 | Unassigned | Unassigned | Unassigned | Outlier                        | Ref |
| OL473597 | Unassigned | Unassigned | Unassigned | Outlier                        | Ref |
| OL512804 | Unassigned | Unassigned | Unassigned | Overlap (VC_32/VC_33)          | Ref |
| OL512807 | Unassigned | Unassigned | Unassigned | Outlier                        | Ref |
| OL539441 | Unassigned | Unassigned | Unassigned | Overlap (VC_1347/VC_1348)      | Ref |
| OL539457 | Unassigned | Unassigned | Unassigned | Overlap (VC_458/VC_586)        | Ref |
| OL539469 | Unassigned | Unassigned | Unassigned | Outlier                        | Ref |
| OL581612 | Unassigned | Unassigned | Unassigned | Overlap (VC_71/VC_74)          | Ref |
| OL617014 | Unassigned | Unassigned | Unassigned | Outlier                        | Ref |
| OL617015 | Unassigned | Unassigned | Unassigned | Singleton                      | Ref |
| OL617016 | Unassigned | Unassigned | Unassigned | Overlap (VC_1403/VC_1406)      | Ref |
| OL617017 | Unassigned | Unassigned | Unassigned | Overlap (VC_1403/VC_1406)      | Ref |
| OL617018 | Unassigned | Unassigned | Unassigned | Overlap (VC_1403/VC_1406)      | Ref |
| OL617019 | Unassigned | Unassigned | Unassigned | Overlap (VC_1403/VC_1406)      | Ref |
| OL617034 | Unassigned | Unassigned | Unassigned | Singleton                      | Ref |
| OL617038 | Unassigned | Unassigned | Unassigned | Outlier                        | Ref |
| OL617039 | Unassigned | Unassigned | Unassigned | Outlier                        | Ref |
| OL617040 | Unassigned | Unassigned | Unassigned | Overlap (VC_932/VC_1050)       | Ref |
| OL770309 | Unassigned | Unassigned | Unassigned | Overlap (VC_286/VC_491)        | Ref |
| OL774570 | Unassigned | Unassigned | Unassigned | Outlier                        | Ref |
| OL774871 | Unassigned | Unassigned | Unassigned | Outlier                        | Ref |
| OL774874 | Unassigned | Unassigned | Unassigned | Outlier                        | Ref |
| OL774875 | Unassigned | Unassigned | Unassigned | Outlier                        | Ref |
| OL791267 | Unassigned | Unassigned | Unassigned | Outlier                        | Ref |
| OL791268 | Unassigned | Unassigned | Unassigned | Overlap (VC_279/VC_529)        | Ref |
| OL799250 | Unassigned | Unassigned | Unassigned | Outlier                        | Ref |
| OL800604 | Unassigned | Unassigned | Unassigned | Outlier                        | Ref |
| OL828290 | Unassigned | Unassigned | Unassigned | Overlap (VC_286/VC_290/VC_491) | Ref |
| OL828291 | Unassigned | Unassigned | Unassigned | Overlap (VC_286/VC_290/VC_491) | Ref |
| OL849997 | Unassigned | Unassigned | Unassigned | Overlap (VC_286/VC_290/VC_491) | Ref |
| OL944604 | Unassigned | Unassigned | Unassigned | Outlier                        | Ref |
| OL963531 | Unassigned | Unassigned | Unassigned | Singleton                      | Ref |
| OL963532 | Unassigned | Unassigned | Unassigned | Singleton                      | Ref |
| OM046624 | Unassigned | Unassigned | Unassigned | Outlier                        | Ref |
| OM112209 | Unassigned | Unassigned | Unassigned | Outlier                        | Ref |
| OM112210 | Unassigned | Unassigned | Unassigned | Outlier                        | Ref |
| OM158235 | Unassigned | Unassigned | Unassigned | Outlier                        | Ref |
| OM334891 | Unassigned | Unassigned | Unassigned | Outlier                        | Ref |



|          |            |            |            |                                   |     |
|----------|------------|------------|------------|-----------------------------------|-----|
| OM373548 | Unassigned | Unassigned | Unassigned | Outlier                           | Ref |
| OM373549 | Unassigned | Unassigned | Unassigned | Overlap (VC_668/VC_694)           | Ref |
| OM373559 | Unassigned | Unassigned | Unassigned | Outlier                           | Ref |
| OM373560 | Unassigned | Unassigned | Unassigned | Overlap (VC_97/VC_99)             | Ref |
| OM416780 | Unassigned | Unassigned | Unassigned | Outlier                           | Ref |
| OM418631 | Unassigned | Unassigned | Unassigned | Outlier                           | Ref |
| OM522998 | Unassigned | Unassigned | Unassigned | Singleton                         | Ref |
| OM523000 | Unassigned | Unassigned | Unassigned | Overlap (VC_400/VC_994/VC_1084)   | Ref |
| OM630587 | Unassigned | Unassigned | Unassigned | Overlap (VC_71/VC_74)             | Ref |
| OM630589 | Unassigned | Unassigned | Unassigned | Overlap (VC_71/VC_74)             | Ref |
| OM638088 | Unassigned | Unassigned | Unassigned | Outlier                           | Ref |
| OM654374 | Unassigned | Unassigned | Unassigned | Outlier                           | Ref |
| OM654375 | Unassigned | Unassigned | Unassigned | Outlier                           | Ref |
| OM654376 | Unassigned | Unassigned | Unassigned | Outlier                           | Ref |
| OM654377 | Unassigned | Unassigned | Unassigned | Outlier                           | Ref |
| OM654378 | Unassigned | Unassigned | Unassigned | Outlier                           | Ref |
| OM681334 | Unassigned | Unassigned | Unassigned | Outlier                           | Ref |
| OM716000 | Unassigned | Unassigned | Unassigned | Singleton                         | Ref |
| OM716001 | Unassigned | Unassigned | Unassigned | Singleton                         | Ref |
| OM716002 | Unassigned | Unassigned | Unassigned | Singleton                         | Ref |
| OM716005 | Unassigned | Unassigned | Unassigned | Overlap (VC_83/VC_85)             | Ref |
| OM735461 | Unassigned | Unassigned | Unassigned | Outlier                           | Ref |
| OM735686 | Unassigned | Unassigned | Unassigned | Overlap (VC_75/VC_115)            | Ref |
| OM735687 | Unassigned | Unassigned | Unassigned | Overlap (VC_431/VC_743)           | Ref |
| OM735688 | Unassigned | Unassigned | Unassigned | Overlap (VC_75/VC_115)            | Ref |
| OM735689 | Unassigned | Unassigned | Unassigned | Overlap (VC_431/VC_743)           | Ref |
| OM869493 | Unassigned | Unassigned | Unassigned | Singleton                         | Ref |
| OM869495 | Unassigned | Unassigned | Unassigned | Singleton                         | Ref |
| OM869496 | Unassigned | Unassigned | Unassigned | Singleton                         | Ref |
| OM869499 | Unassigned | Unassigned | Unassigned | Singleton                         | Ref |
| OM869501 | Unassigned | Unassigned | Unassigned | Outlier                           | Ref |
| OM869504 | Unassigned | Unassigned | Unassigned | Singleton                         | Ref |
| OM869506 | Unassigned | Unassigned | Unassigned | Overlap (VC_1119/VC_1122/VC_1321) | Ref |
| OM869507 | Unassigned | Unassigned | Unassigned | Outlier                           | Ref |
| OM869508 | Unassigned | Unassigned | Unassigned | Overlap (VC_1119/VC_1122/VC_1321) | Ref |
| OM869509 | Unassigned | Unassigned | Unassigned | Overlap (VC_1054/VC_1055)         | Ref |
| OM869511 | Unassigned | Unassigned | Unassigned | Singleton                         | Ref |
| OM869515 | Unassigned | Unassigned | Unassigned | Outlier                           | Ref |
| OM869518 | Unassigned | Unassigned | Unassigned | Overlap (VC_1114/VC_1136)         | Ref |
| OM869520 | Unassigned | Unassigned | Unassigned | Singleton                         | Ref |
| OM869522 | Unassigned | Unassigned | Unassigned | Overlap (VC_1056/VC_1057/VC_1061) | Ref |
| OM869523 | Unassigned | Unassigned | Unassigned | Outlier                           | Ref |
| OM869530 | Unassigned | Unassigned | Unassigned | Outlier                           | Ref |
| OM869536 | Unassigned | Unassigned | Unassigned | Outlier                           | Ref |
| OM869539 | Unassigned | Unassigned | Unassigned | Singleton                         | Ref |
| OM869541 | Unassigned | Unassigned | Unassigned | Outlier                           | Ref |
| OM869551 | Unassigned | Unassigned | Unassigned | Outlier                           | Ref |
| OM869554 | Unassigned | Unassigned | Unassigned | Overlap (VC_1130/VC_1135)         | Ref |
| OM869556 | Unassigned | Unassigned | Unassigned | Outlier                           | Ref |
| OM869567 | Unassigned | Unassigned | Unassigned | Outlier                           | Ref |
| OM869575 | Unassigned | Unassigned | Unassigned | Outlier                           | Ref |
| OM869579 | Unassigned | Unassigned | Unassigned | Singleton                         | Ref |
| OM869580 | Unassigned | Unassigned | Unassigned | Singleton                         | Ref |
| OM869585 | Unassigned | Unassigned | Unassigned | Singleton                         | Ref |
| OM869586 | Unassigned | Unassigned | Unassigned | Singleton                         | Ref |
| OM869591 | Unassigned | Unassigned | Unassigned | Outlier                           | Ref |
| OM869603 | Unassigned | Unassigned | Unassigned | Overlap (VC_1119/VC_1122/VC_1321) | Ref |
| OM869605 | Unassigned | Unassigned | Unassigned | Outlier                           | Ref |
| OM869607 | Unassigned | Unassigned | Unassigned | Singleton                         | Ref |
| OM869608 | Unassigned | Unassigned | Unassigned | Singleton                         | Ref |
| OM869609 | Unassigned | Unassigned | Unassigned | Singleton                         | Ref |
| OM869611 | Unassigned | Unassigned | Unassigned | Singleton                         | Ref |
| OM869625 | Unassigned | Unassigned | Unassigned | Singleton                         | Ref |
| OM869628 | Unassigned | Unassigned | Unassigned | Overlap (VC_1119/VC_1121)         | Ref |
| OM869630 | Unassigned | Unassigned | Unassigned | Singleton                         | Ref |
| OM869631 | Unassigned | Unassigned | Unassigned | Overlap (VC_1119/VC_1122/VC_1321) | Ref |
| OM869636 | Unassigned | Unassigned | Unassigned | Singleton                         | Ref |
| OM869646 | Unassigned | Unassigned | Unassigned | Outlier                           | Ref |
| OM869647 | Unassigned | Unassigned | Unassigned | Singleton                         | Ref |
| OM869649 | Unassigned | Unassigned | Unassigned | Outlier                           | Ref |
| OM869651 | Unassigned | Unassigned | Unassigned | Outlier                           | Ref |
| OM869656 | Unassigned | Unassigned | Unassigned | Singleton                         | Ref |
| OM869659 | Unassigned | Unassigned | Unassigned | Outlier                           | Ref |
| OM869660 | Unassigned | Unassigned | Unassigned | Outlier                           | Ref |
| OM869661 | Unassigned | Unassigned | Unassigned | Outlier                           | Ref |
| OM869662 | Unassigned | Unassigned | Unassigned | Outlier                           | Ref |
| OM869665 | Unassigned | Unassigned | Unassigned | Outlier                           | Ref |
| OM869667 | Unassigned | Unassigned | Unassigned | Outlier                           | Ref |
| OM869678 | Unassigned | Unassigned | Unassigned | Singleton                         | Ref |
| OM869680 | Unassigned | Unassigned | Unassigned | Singleton                         | Ref |
| OM869681 | Unassigned | Unassigned | Unassigned | Singleton                         | Ref |



|          |            |            |            |                                   |     |
|----------|------------|------------|------------|-----------------------------------|-----|
| OM869682 | Unassigned | Unassigned | Unassigned | Outlier                           | Ref |
| OM869683 | Unassigned | Unassigned | Unassigned | Outlier                           | Ref |
| OM869685 | Unassigned | Unassigned | Unassigned | Outlier                           | Ref |
| OM869690 | Unassigned | Unassigned | Unassigned | Outlier                           | Ref |
| OM869692 | Unassigned | Unassigned | Unassigned | Singleton                         | Ref |
| OM869693 | Unassigned | Unassigned | Unassigned | Outlier                           | Ref |
| OM869694 | Unassigned | Unassigned | Unassigned | Overlap (VC_1119/VC_1121/VC_1321) | Ref |
| OM869695 | Unassigned | Unassigned | Unassigned | Singleton                         | Ref |
| OM869699 | Unassigned | Unassigned | Unassigned | Outlier                           | Ref |
| OM869705 | Unassigned | Unassigned | Unassigned | Singleton                         | Ref |
| OM869710 | Unassigned | Unassigned | Unassigned | Outlier                           | Ref |
| OM869714 | Unassigned | Unassigned | Unassigned | Outlier                           | Ref |
| OM869715 | Unassigned | Unassigned | Unassigned | Singleton                         | Ref |
| OM912978 | Unassigned | Unassigned | Unassigned | Overlap (VC_286/VC_290/VC_491)    | Ref |
| OM912979 | Unassigned | Unassigned | Unassigned | Outlier                           | Ref |
| OM913583 | Unassigned | Unassigned | Unassigned | Overlap (VC_238/VC_240)           | Ref |
| OM913599 | Unassigned | Unassigned | Unassigned | Overlap (VC_455/VC_1028)          | Ref |
| OM962999 | Unassigned | Unassigned | Unassigned | Overlap (VC_71/VC_74)             | Ref |
| ON004963 | Unassigned | Unassigned | Unassigned | Overlap (VC_841/VC_842)           | Ref |
| ON014756 | Unassigned | Unassigned | Unassigned | Outlier                           | Ref |
| ON032529 | Unassigned | Unassigned | Unassigned | Overlap (VC_36/VC_60)             | Ref |
| ON041214 | Unassigned | Unassigned | Unassigned | Outlier                           | Ref |
| ON062054 | Unassigned | Unassigned | Unassigned | Overlap (VC_458/VC_586)           | Ref |
| ON067806 | Unassigned | Unassigned | Unassigned | Singleton                         | Ref |
| ON075462 | Unassigned | Unassigned | Unassigned | Overlap (VC_905/VC_907)           | Ref |
| ON075799 | Unassigned | Unassigned | Unassigned | Overlap (VC_583/VC_851)           | Ref |
| ON081336 | Unassigned | Unassigned | Unassigned | Overlap (VC_872/VC_873)           | Ref |
| ON087563 | Unassigned | Unassigned | Unassigned | Outlier                           | Ref |
| ON108641 | Unassigned | Unassigned | Unassigned | Overlap (VC_1172/VC_1173)         | Ref |
| ON113345 | Unassigned | Unassigned | Unassigned | Overlap (VC_14/VC_15)             | Ref |
| ON146294 | Unassigned | Unassigned | Unassigned | Outlier                           | Ref |
| ON170044 | Unassigned | Unassigned | Unassigned | Outlier                           | Ref |
| ON170045 | Unassigned | Unassigned | Unassigned | Outlier                           | Ref |
| ON170047 | Unassigned | Unassigned | Unassigned | Outlier                           | Ref |
| ON170048 | Unassigned | Unassigned | Unassigned | Outlier                           | Ref |
| ON170063 | Unassigned | Unassigned | Unassigned | Outlier                           | Ref |
| ON170065 | Unassigned | Unassigned | Unassigned | Outlier                           | Ref |
| ON170085 | Unassigned | Unassigned | Unassigned | Outlier                           | Ref |
| ON170138 | Unassigned | Unassigned | Unassigned | Outlier                           | Ref |
| ON170140 | Unassigned | Unassigned | Unassigned | Outlier                           | Ref |
| ON170177 | Unassigned | Unassigned | Unassigned | Outlier                           | Ref |
| ON170183 | Unassigned | Unassigned | Unassigned | Outlier                           | Ref |
| ON170191 | Unassigned | Unassigned | Unassigned | Overlap (VC_182/VC_187)           | Ref |
| ON170255 | Unassigned | Unassigned | Unassigned | Outlier                           | Ref |
| ON170256 | Unassigned | Unassigned | Unassigned | Outlier                           | Ref |
| ON170259 | Unassigned | Unassigned | Unassigned | Outlier                           | Ref |
| ON170310 | Unassigned | Unassigned | Unassigned | Outlier                           | Ref |
| ON170342 | Unassigned | Unassigned | Unassigned | Overlap (VC_182/VC_187)           | Ref |
| ON170345 | Unassigned | Unassigned | Unassigned | Outlier                           | Ref |
| ON191531 | Unassigned | Unassigned | Unassigned | Outlier                           | Ref |
| ON191532 | Unassigned | Unassigned | Unassigned | Outlier                           | Ref |
| ON208831 | Unassigned | Unassigned | Unassigned | Overlap (VC_1164/VC_1243)         | Ref |
| ON212265 | Unassigned | Unassigned | Unassigned | Overlap (VC_286/VC_290/VC_491)    | Ref |
| ON212267 | Unassigned | Unassigned | Unassigned | Overlap (VC_286/VC_290/VC_491)    | Ref |
| ON245412 | Unassigned | Unassigned | Unassigned | Outlier                           | Ref |
| ON260830 | Unassigned | Unassigned | Unassigned | Overlap (VC_526/VC_554)           | Ref |
| ON287368 | Unassigned | Unassigned | Unassigned | Outlier                           | Ref |
| ON287371 | Unassigned | Unassigned | Unassigned | Outlier                           | Ref |
| ON325435 | Unassigned | Unassigned | Unassigned | Overlap (VC_14/VC_107)            | Ref |
| ON392163 | Unassigned | Unassigned | Unassigned | Overlap (VC_1241/VC_1242)         | Ref |
| ON392164 | Unassigned | Unassigned | Unassigned | Overlap (VC_728/VC_730)           | Ref |
| ON392165 | Unassigned | Unassigned | Unassigned | Overlap (VC_728/VC_730)           | Ref |
| ON392167 | Unassigned | Unassigned | Unassigned | Outlier                           | Ref |
| ON456341 | Unassigned | Unassigned | Unassigned | Overlap (VC_728/VC_730)           | Ref |
| ON456347 | Unassigned | Unassigned | Unassigned | Outlier                           | Ref |
| ON456355 | Unassigned | Unassigned | Unassigned | Overlap (VC_526/VC_554)           | Ref |
| ON470581 | Unassigned | Unassigned | Unassigned | Overlap (VC_36/VC_60)             | Ref |
| ON470585 | Unassigned | Unassigned | Unassigned | Overlap (VC_36/VC_60)             | Ref |
| ON470587 | Unassigned | Unassigned | Unassigned | Overlap (VC_36/VC_60)             | Ref |
| ON470595 | Unassigned | Unassigned | Unassigned | Overlap (VC_36/VC_60)             | Ref |
| ON470599 | Unassigned | Unassigned | Unassigned | Outlier                           | Ref |
| ON470602 | Unassigned | Unassigned | Unassigned | Overlap (VC_36/VC_60)             | Ref |
| ON470608 | Unassigned | Unassigned | Unassigned | Overlap (VC_244/VC_245)           | Ref |
| ON470609 | Unassigned | Unassigned | Unassigned | Overlap (VC_36/VC_60)             | Ref |
| ON470611 | Unassigned | Unassigned | Unassigned | Outlier                           | Ref |
| ON470614 | Unassigned | Unassigned | Unassigned | Overlap (VC_36/VC_60)             | Ref |
| ON470616 | Unassigned | Unassigned | Unassigned | Overlap (VC_36/VC_60)             | Ref |
| ON470622 | Unassigned | Unassigned | Unassigned | Overlap (VC_244/VC_245)           | Ref |
| ON526983 | Unassigned | Unassigned | Unassigned | Overlap (VC_983/VC_984)           | Ref |
| ON529861 | Unassigned | Unassigned | Unassigned | Outlier                           | Ref |
| ON550478 | Unassigned | Unassigned | Unassigned | Overlap (VC_14/VC_107)            | Ref |



|          |            |            |            |                                |     |
|----------|------------|------------|------------|--------------------------------|-----|
| ON585039 | Unassigned | Unassigned | Unassigned | Overlap (VC_286/VC_290/VC_491) | Ref |
| ON602731 | Unassigned | Unassigned | Unassigned | Overlap (VC_463/VC_609)        | Ref |
| ON602745 | Unassigned | Unassigned | Unassigned | Outlier                        | Ref |
| ON604651 | Unassigned | Unassigned | Unassigned | Overlap (VC_83/VC_85)          | Ref |
| ON615601 | Unassigned | Unassigned | Unassigned | Outlier                        | Ref |
| ON623732 | Unassigned | Unassigned | Unassigned | Overlap (VC_593/VC_597)        | Ref |
| ON624112 | Unassigned | Unassigned | Unassigned | Overlap (VC_455/VC_1028)       | Ref |
| ON645340 | Unassigned | Unassigned | Unassigned | Overlap (VC_1172/VC_1173)      | Ref |
| ON755180 | Unassigned | Unassigned | Unassigned | Outlier                        | Ref |
| ON778006 | Unassigned | Unassigned | Unassigned | Overlap (VC_177/VC_296)        | Ref |
| ON854455 | Unassigned | Unassigned | Unassigned | Outlier                        | Ref |
| ON872163 | Unassigned | Unassigned | Unassigned | Outlier                        | Ref |
| ON886116 | Unassigned | Unassigned | Unassigned | Outlier                        | Ref |
| ON920540 | Unassigned | Unassigned | Unassigned | Outlier                        | Ref |
| ON950054 | Unassigned | Unassigned | Unassigned | Outlier                        | Ref |
| ON970570 | Unassigned | Unassigned | Unassigned | Overlap (VC_1164/VC_1243)      | Ref |
| ON970615 | Unassigned | Unassigned | Unassigned | Outlier                        | Ref |
| ON970617 | Unassigned | Unassigned | Unassigned | Overlap (VC_872/VC_873)        | Ref |
| ON981384 | Unassigned | Unassigned | Unassigned | Outlier                        | Ref |
| OP012469 | Unassigned | Unassigned | Unassigned | Outlier                        | Ref |
| OP018674 | Unassigned | Unassigned | Unassigned | Overlap (VC_695/VC_696)        | Ref |
| OP066531 | Unassigned | Unassigned | Unassigned | Outlier                        | Ref |
| OP068330 | Unassigned | Unassigned | Unassigned | Overlap (VC_1164/VC_1243)      | Ref |
| OP079919 | Unassigned | Unassigned | Unassigned | Overlap (VC_442/VC_443)        | Ref |
| OP087422 | Unassigned | Unassigned | Unassigned | Overlap (VC_71/VC_72)          | Ref |
| OP087423 | Unassigned | Unassigned | Unassigned | Overlap (VC_71/VC_72)          | Ref |
| OP120783 | Unassigned | Unassigned | Unassigned | Overlap (VC_584/VC_586)        | Ref |
| OP123707 | Unassigned | Unassigned | Unassigned | Overlap (VC_442/VC_443)        | Ref |
| OP125547 | Unassigned | Unassigned | Unassigned | Outlier                        | Ref |
| OP142323 | Unassigned | Unassigned | Unassigned | Overlap (VC_14/VC_107)         | Ref |
| OP172869 | Unassigned | Unassigned | Unassigned | Overlap (VC_1165/VC_1166)      | Ref |
| OP172871 | Unassigned | Unassigned | Unassigned | Overlap (VC_1172/VC_1173)      | Ref |
| OP209175 | Unassigned | Unassigned | Unassigned | Outlier                        | Ref |
| OP209177 | Unassigned | Unassigned | Unassigned | Singleton                      | Ref |
| OP209178 | Unassigned | Unassigned | Unassigned | Outlier                        | Ref |
| OP206522 | Unassigned | Unassigned | Unassigned | Outlier                        | Ref |
| OP207179 | Unassigned | Unassigned | Unassigned | Overlap (VC_97/VC_99)          | Ref |
| OP207530 | Unassigned | Unassigned | Unassigned | Overlap (VC_238/VC_240)        | Ref |
| OP207545 | Unassigned | Unassigned | Unassigned | Outlier                        | Ref |
| OP323071 | Unassigned | Unassigned | Unassigned | Overlap (VC_257/VC_262)        | Ref |
| OP323072 | Unassigned | Unassigned | Unassigned | Overlap (VC_257/VC_262)        | Ref |
| OP323073 | Unassigned | Unassigned | Unassigned | Overlap (VC_257/VC_262)        | Ref |
| OP323074 | Unassigned | Unassigned | Unassigned | Overlap (VC_257/VC_262)        | Ref |
| OP323075 | Unassigned | Unassigned | Unassigned | Overlap (VC_257/VC_262)        | Ref |
| OP323076 | Unassigned | Unassigned | Unassigned | Overlap (VC_257/VC_262)        | Ref |
| OP323077 | Unassigned | Unassigned | Unassigned | Overlap (VC_257/VC_262)        | Ref |
| OP328421 | Unassigned | Unassigned | Unassigned | Outlier                        | Ref |
| OP341623 | Unassigned | Unassigned | Unassigned | Outlier                        | Ref |
| OP341629 | Unassigned | Unassigned | Unassigned | Outlier                        | Ref |
| OP380492 | Unassigned | Unassigned | Unassigned | Overlap (VC_87/VC_88)          | Ref |
| OP380511 | Unassigned | Unassigned | Unassigned | Outlier                        | Ref |
| OP413827 | Unassigned | Unassigned | Unassigned | Overlap (VC_841/VC_842)        | Ref |
| OP413831 | Unassigned | Unassigned | Unassigned | Overlap (VC_841/VC_842)        | Ref |
| OP433492 | Unassigned | Unassigned | Unassigned | Overlap (VC_818/VC_820)        | Ref |
| OP434446 | Unassigned | Unassigned | Unassigned | Outlier                        | Ref |
| OP434449 | Unassigned | Unassigned | Unassigned | Outlier                        | Ref |
| OP434518 | Unassigned | Unassigned | Unassigned | Outlier                        | Ref |
| OP481051 | Unassigned | Unassigned | Unassigned | Outlier                        | Ref |
| OP490597 | Unassigned | Unassigned | Unassigned | Overlap (VC_82/VC_619)         | Ref |
| OP503989 | Unassigned | Unassigned | Unassigned | Overlap (VC_710/VC_713)        | Ref |
| OP503990 | Unassigned | Unassigned | Unassigned | Overlap (VC_710/VC_713)        | Ref |
| OP503991 | Unassigned | Unassigned | Unassigned | Overlap (VC_710/VC_713)        | Ref |
| OP535465 | Unassigned | Unassigned | Unassigned | Outlier                        | Ref |
| OP559179 | Unassigned | Unassigned | Unassigned | Outlier                        | Ref |
| OP617331 | Unassigned | Unassigned | Unassigned | Overlap (VC_286/VC_491)        | Ref |
| OP617741 | Unassigned | Unassigned | Unassigned | Outlier                        | Ref |
| OP650935 | Unassigned | Unassigned | Unassigned | Outlier                        | Ref |
| OP650936 | Unassigned | Unassigned | Unassigned | Overlap (VC_38/VC_812)         | Ref |
| OP714164 | Unassigned | Unassigned | Unassigned | Outlier                        | Ref |
| OU343168 | Unassigned | Unassigned | Unassigned | Overlap (VC_442/VC_443)        | Ref |
| OU509537 | Unassigned | Unassigned | Unassigned | Overlap (VC_593/VC_597)        | Ref |
| OV696620 | Unassigned | Unassigned | Unassigned | Overlap (VC_702/VC_704)        | Ref |
| OV696622 | Unassigned | Unassigned | Unassigned | Outlier                        | Ref |
| OW991346 | Unassigned | Unassigned | Unassigned | Overlap (VC_83/VC_85)          | Ref |
| OX001577 | Unassigned | Unassigned | Unassigned | Overlap (VC_83/VC_85)          | Ref |
| OX090892 | Unassigned | Unassigned | Unassigned | Overlap (VC_83/VC_85)          | Ref |
| OX241423 | Unassigned | Unassigned | Unassigned | Overlap (VC_494/VC_495)        | Ref |
| OX241442 | Unassigned | Unassigned | Unassigned | Overlap (VC_494/VC_495)        | Ref |
| OX241443 | Unassigned | Unassigned | Unassigned | Outlier                        | Ref |
| OX241444 | Unassigned | Unassigned | Unassigned | Overlap (VC_494/VC_495)        | Ref |
| OX241464 | Unassigned | Unassigned | Unassigned | Overlap (VC_494/VC_495)        | Ref |



|                         |            |            |            |                                         |      |
|-------------------------|------------|------------|------------|-----------------------------------------|------|
| OX241555                | Unassigned | Unassigned | Unassigned | Overlap (VC_1042/VC_1043)               | Ref  |
| OX241576                | Unassigned | Unassigned | Unassigned | Overlap (VC_494/VC_495)                 | Ref  |
| OX335406                | Unassigned | Unassigned | Unassigned | Overlap (VC_841/VC_842)                 | Ref  |
| PMULLEFTEN              | Unassigned | Unassigned | Unassigned | Outlier                                 | Ref  |
| S1-wms-combined_100430  | Unassigned | Unassigned | Unassigned | Overlap (VC_711/VC_715)                 | ME   |
| S1-wms-combined_102801  | Unassigned | Unassigned | Unassigned | Outlier                                 | ME   |
| S1-wms-combined_107766  | Unassigned | Unassigned | Unassigned | Overlap (VC_652/VC_1481)                | ME   |
| S1-wms-combined_116938  | Unassigned | Unassigned | Unassigned | Outlier                                 | ME   |
| S1-wms-combined_131270  | Unassigned | Unassigned | Unassigned | Outlier                                 | ME   |
| S1-wms-combined_136097  | Unassigned | Unassigned | Unassigned | Outlier                                 | ME   |
| S1-wms-combined_143459  | Unassigned | Unassigned | Unassigned | Outlier                                 | ME   |
| S1-wms-combined_153670  | Unassigned | Unassigned | Unassigned | Overlap (VC_1245/VC_1487)               | ME   |
| S1-wms-combined_164894  | Unassigned | Unassigned | Unassigned | Outlier                                 | ME   |
| S1-wms-combined_166392  | Unassigned | Unassigned | Unassigned | Overlap (VC_893/VC_894)                 | ME   |
| S1-wms-combined_169788  | Unassigned | Unassigned | Unassigned | Singleton                               | ME   |
| S1-wms-combined_17651   | Unassigned | Unassigned | Unassigned | Overlap (VC_1490/VC_1491)               | ME   |
| S1-wms-combined_186878  | Unassigned | Unassigned | Unassigned | Outlier                                 | ME   |
| S1-wms-combined_212892  | Unassigned | Unassigned | Unassigned | Outlier                                 | ME   |
| S1-wms-combined_227003  | Unassigned | Unassigned | Unassigned | Outlier                                 | ME   |
| S1-wms-combined_227917  | Unassigned | Unassigned | Unassigned | Outlier                                 | ME   |
| S1-wms-combined_231234  | Unassigned | Unassigned | Unassigned | Singleton                               | ME   |
| S1-wms-combined_231411  | Unassigned | Unassigned | Unassigned | Singleton                               | ME   |
| S1-wms-combined_252439  | Unassigned | Unassigned | Unassigned | Outlier                                 | ME   |
| S1-wms-combined_279492  | Unassigned | Unassigned | Unassigned | Outlier                                 | ME   |
| S1-wms-combined_285012  | Unassigned | Unassigned | Unassigned | Overlap (VC_711/VC_715)                 | ME   |
| S1-wms-combined_308848  | Unassigned | Unassigned | Unassigned | Outlier                                 | ME   |
| S1-wms-combined_32863   | Unassigned | Unassigned | Unassigned | Singleton                               | ME   |
| S1-wms-combined_330329  | Unassigned | Unassigned | Unassigned | Overlap (VC_678/VC_679)                 | ME   |
| S1-wms-combined_351889  | Unassigned | Unassigned | Unassigned | Overlap (VC_817/VC_1210)                | ME   |
| S1-wms-combined_373308  | Unassigned | Unassigned | Unassigned | Overlap (VC_1483/VC_1490)               | ME   |
| S1-wms-combined_374219  | Unassigned | Unassigned | Unassigned | Overlap (VC_651/VC_736)                 | ME   |
| S1-wms-combined_52708   | Unassigned | Unassigned | Unassigned | Overlap (VC_1221/VC_1237)               | ME   |
| S1-wms-combined_57370   | Unassigned | Unassigned | Unassigned | Outlier                                 | ME   |
| S1-wms-combined_92523   | Unassigned | Unassigned | Unassigned | Outlier                                 | ME   |
| S1-wms-combined_94988   | Unassigned | Unassigned | Unassigned | Outlier                                 | ME   |
| S1-wms_106115           | Unassigned | Unassigned | Unassigned | Outlier                                 | ME   |
| S1-wms_153615           | Unassigned | Unassigned | Unassigned | Overlap (VC_1245/VC_1487)               | ME   |
| S1-wms_208875           | Unassigned | Unassigned | Unassigned | Outlier                                 | ME   |
| S1-wms_223620           | Unassigned | Unassigned | Unassigned | Overlap (VC_893/VC_894)                 | ME   |
| S1-wms_236105           | Unassigned | Unassigned | Unassigned | Outlier                                 | ME   |
| S1-wms_265285           | Unassigned | Unassigned | Unassigned | Overlap (VC_138/VC_146/VC_147)          | ME   |
| S1-wms_29288            | Unassigned | Unassigned | Unassigned | Outlier                                 | ME   |
| S1-wms_32878            | Unassigned | Unassigned | Unassigned | Singleton                               | ME   |
| S1-wms_388292           | Unassigned | Unassigned | Unassigned | Singleton                               | ME   |
| S1-wms_394571           | Unassigned | Unassigned | Unassigned | Outlier                                 | ME   |
| S11-wms-combined_101337 | Unassigned | Unassigned | Unassigned | Outlier                                 | ME   |
| S11-wms-combined_112147 | Unassigned | Unassigned | Unassigned | Outlier                                 | ME   |
| S11-wms-combined_112733 | Unassigned | Unassigned | Unassigned | Outlier                                 | ME   |
| S11-wms-combined_116589 | Unassigned | Unassigned | Unassigned | Outlier                                 | ME   |
| S11-wms-combined_117756 | Unassigned | Unassigned | Unassigned | Singleton                               | ME   |
| S11-wms-combined_120257 | Unassigned | Unassigned | Unassigned | Overlap (VC_711/VC_715)                 | ME   |
| S11-wms-combined_14636  | Unassigned | Unassigned | Unassigned | Outlier                                 | ME   |
| S11-wms-combined_168048 | Unassigned | Unassigned | Unassigned | Outlier                                 | ME   |
| S11-wms-combined_179605 | Unassigned | Unassigned | Unassigned | Overlap (VC_893/VC_894/VC_1489/VC_1494) | ME   |
| S11-wms-combined_215723 | Unassigned | Unassigned | Unassigned | Outlier                                 | ME   |
| S11-wms-combined_226165 | Unassigned | Unassigned | Unassigned | Overlap (VC_678/VC_679)                 | ME   |
| S11-wms-combined_236214 | Unassigned | Unassigned | Unassigned | Outlier                                 | ME   |
| S11-wms-combined_265453 | Unassigned | Unassigned | Unassigned | Singleton                               | ME   |
| S11-wms-combined_282227 | Unassigned | Unassigned | Unassigned | Outlier                                 | ME   |
| S11-wms-combined_320710 | Unassigned | Unassigned | Unassigned | Overlap (VC_342/VC_1215)                | ME   |
| S11-wms-combined_321938 | Unassigned | Unassigned | Unassigned | Overlap (VC_678/VC_679)                 | ME   |
| S11-wms-combined_329493 | Unassigned | Unassigned | Unassigned | Outlier                                 | ME   |
| S11-wms-combined_63818  | Unassigned | Unassigned | Unassigned | Outlier                                 | ME   |
| S11-wms-combined_64392  | Unassigned | Unassigned | Unassigned | Overlap (VC_678/VC_679)                 | ME   |
| S11-wms_32691           | Unassigned | Unassigned | Unassigned | Singleton                               | ME   |
| S11-wms_6203            | Unassigned | Unassigned | Unassigned | Singleton                               | ME   |
| S11-wms_87293           | Unassigned | Unassigned | Unassigned | Outlier                                 | ME   |
| S12-wms-combined_117447 | Unassigned | Unassigned | Unassigned | Singleton                               | SHHC |
| S12-wms-combined_117628 | Unassigned | Unassigned | Unassigned | Overlap (VC_20/VC_542)                  | SHHC |
| S12-wms-combined_132907 | Unassigned | Unassigned | Unassigned | Overlap (VC_138/VC_146)                 | SHHC |
| S12-wms-combined_133608 | Unassigned | Unassigned | Unassigned | Overlap (VC_1490/VC_1491)               | SHHC |
| S12-wms-combined_148741 | Unassigned | Unassigned | Unassigned | Overlap (VC_1103/VC_1240)               | SHHC |
| S12-wms-combined_151843 | Unassigned | Unassigned | Unassigned | Outlier                                 | SHHC |
| S12-wms-combined_164656 | Unassigned | Unassigned | Unassigned | Outlier                                 | SHHC |
| S12-wms-combined_184338 | Unassigned | Unassigned | Unassigned | Overlap (VC_652/VC_894)                 | SHHC |
| S12-wms-combined_189323 | Unassigned | Unassigned | Unassigned | Overlap (VC_678/VC_679)                 | SHHC |
| S12-wms-combined_190114 | Unassigned | Unassigned | Unassigned | Outlier                                 | SHHC |
| S12-wms-combined_21504  | Unassigned | Unassigned | Unassigned | Outlier                                 | SHHC |
| S12-wms-combined_223043 | Unassigned | Unassigned | Unassigned | Outlier                                 | SHHC |
| S12-wms-combined_25459  | Unassigned | Unassigned | Unassigned | Overlap (VC_652/VC_1481)                | SHHC |
| S12-wms-combined_264077 | Unassigned | Unassigned | Unassigned | Outlier                                 | SHHC |



|                         |            |            |            |                                 |      |
|-------------------------|------------|------------|------------|---------------------------------|------|
| S12-wms-combined_270839 | Unassigned | Unassigned | Unassigned | Overlap (VC_1103/VC_1240)       | SHHC |
| S12-wms-combined_293354 | Unassigned | Unassigned | Unassigned | Outlier                         | SHHC |
| S12-wms-combined_297545 | Unassigned | Unassigned | Unassigned | Overlap (VC_918/VC_1456)        | SHHC |
| S12-wms-combined_302876 | Unassigned | Unassigned | Unassigned | Outlier                         | SHHC |
| S12-wms-combined_313953 | Unassigned | Unassigned | Unassigned | Outlier                         | SHHC |
| S12-wms-combined_31761  | Unassigned | Unassigned | Unassigned | Overlap (VC_877/VC_1413)        | SHHC |
| S12-wms-combined_320262 | Unassigned | Unassigned | Unassigned | Overlap (VC_652/VC_1481)        | SHHC |
| S12-wms-combined_325418 | Unassigned | Unassigned | Unassigned | Outlier                         | SHHC |
| S12-wms-combined_328554 | Unassigned | Unassigned | Unassigned | Outlier                         | SHHC |
| S12-wms-combined_359190 | Unassigned | Unassigned | Unassigned | Outlier                         | SHHC |
| S12-wms-combined_368190 | Unassigned | Unassigned | Unassigned | Overlap (VC_918/VC_1456)        | SHHC |
| S12-wms-combined_368562 | Unassigned | Unassigned | Unassigned | Outlier                         | SHHC |
| S12-wms-combined_371541 | Unassigned | Unassigned | Unassigned | Outlier                         | SHHC |
| S12-wms-combined_385270 | Unassigned | Unassigned | Unassigned | Overlap (VC_630/VC_642)         | SHHC |
| S12-wms-combined_390985 | Unassigned | Unassigned | Unassigned | Singleton                       | SHHC |
| S12-wms-combined_48648  | Unassigned | Unassigned | Unassigned | Outlier                         | SHHC |
| S12-wms-combined_52101  | Unassigned | Unassigned | Unassigned | Overlap (VC_138/VC_146)         | SHHC |
| S12-wms-combined_63056  | Unassigned | Unassigned | Unassigned | Singleton                       | SHHC |
| S12-wms-combined_63649  | Unassigned | Unassigned | Unassigned | Outlier                         | SHHC |
| S12-wms-combined_75733  | Unassigned | Unassigned | Unassigned | Overlap (VC_1244/VC_1245)       | SHHC |
| S12-wms_135291          | Unassigned | Unassigned | Unassigned | Outlier                         | SHHC |
| S12-wms_161239          | Unassigned | Unassigned | Unassigned | Overlap (VC_138/VC_146/VC_147)  | SHHC |
| S12-wms_17950           | Unassigned | Unassigned | Unassigned | Outlier                         | SHHC |
| S12-wms_184276          | Unassigned | Unassigned | Unassigned | Overlap (VC_735/VC_915)         | SHHC |
| S12-wms_202803          | Unassigned | Unassigned | Unassigned | Outlier                         | SHHC |
| S12-wms_223235          | Unassigned | Unassigned | Unassigned | Singleton                       | SHHC |
| S12-wms_235125          | Unassigned | Unassigned | Unassigned | Outlier                         | SHHC |
| S12-wms_336780          | Unassigned | Unassigned | Unassigned | Singleton                       | SHHC |
| S12-wms_352846          | Unassigned | Unassigned | Unassigned | Singleton                       | SHHC |
| S17-wms-combined_106262 | Unassigned | Unassigned | Unassigned | Overlap (VC_711/VC_715)         | ME   |
| S17-wms-combined_106940 | Unassigned | Unassigned | Unassigned | Outlier                         | ME   |
| S17-wms-combined_140517 | Unassigned | Unassigned | Unassigned | Outlier                         | ME   |
| S17-wms-combined_146050 | Unassigned | Unassigned | Unassigned | Outlier                         | ME   |
| S17-wms-combined_171305 | Unassigned | Unassigned | Unassigned | Outlier                         | ME   |
| S17-wms-combined_179363 | Unassigned | Unassigned | Unassigned | Overlap (VC_630/VC_642)         | ME   |
| S17-wms-combined_185239 | Unassigned | Unassigned | Unassigned | Outlier                         | ME   |
| S17-wms-combined_253409 | Unassigned | Unassigned | Unassigned | Overlap (VC_833/VC_1015)        | ME   |
| S17-wms-combined_258087 | Unassigned | Unassigned | Unassigned | Overlap (VC_138/VC_146)         | ME   |
| S17-wms-combined_39687  | Unassigned | Unassigned | Unassigned | Overlap (VC_733/VC_893/VC_1494) | ME   |
| S17-wms-combined_56006  | Unassigned | Unassigned | Unassigned | Overlap (VC_607/VC_1238)        | ME   |
| S17-wms-combined_56061  | Unassigned | Unassigned | Unassigned | Overlap (VC_1221/VC_1237)       | ME   |
| S17-wms-combined_66123  | Unassigned | Unassigned | Unassigned | Overlap (VC_138/VC_146/VC_148)  | ME   |
| S17-wms-combined_72837  | Unassigned | Unassigned | Unassigned | Outlier                         | ME   |
| S17-wms-combined_75892  | Unassigned | Unassigned | Unassigned | Overlap (VC_138/VC_146/VC_148)  | ME   |
| S17-wms_106671          | Unassigned | Unassigned | Unassigned | Overlap (VC_138/VC_146)         | ME   |
| S17-wms_116248          | Unassigned | Unassigned | Unassigned | Overlap (VC_138/VC_146/VC_147)  | ME   |
| S17-wms_235536          | Unassigned | Unassigned | Unassigned | Outlier                         | ME   |
| S17-wms_29082           | Unassigned | Unassigned | Unassigned | Overlap (VC_138/VC_146/VC_147)  | ME   |
| S2-wms-combined_110215  | Unassigned | Unassigned | Unassigned | Outlier                         | SHHC |
| S2-wms-combined_115352  | Unassigned | Unassigned | Unassigned | Singleton                       | SHHC |
| S2-wms-combined_122457  | Unassigned | Unassigned | Unassigned | Overlap (VC_138/VC_146/VC_148)  | SHHC |
| S2-wms-combined_126440  | Unassigned | Unassigned | Unassigned | Outlier                         | SHHC |
| S2-wms-combined_127080  | Unassigned | Unassigned | Unassigned | Outlier                         | SHHC |
| S2-wms-combined_135014  | Unassigned | Unassigned | Unassigned | Overlap (VC_138/VC_146)         | SHHC |
| S2-wms-combined_143737  | Unassigned | Unassigned | Unassigned | Outlier                         | SHHC |
| S2-wms-combined_147065  | Unassigned | Unassigned | Unassigned | Overlap (VC_678/VC_679)         | SHHC |
| S2-wms-combined_158821  | Unassigned | Unassigned | Unassigned | Overlap (VC_422/VC_1413)        | SHHC |
| S2-wms-combined_159670  | Unassigned | Unassigned | Unassigned | Outlier                         | SHHC |
| S2-wms-combined_170845  | Unassigned | Unassigned | Unassigned | Outlier                         | SHHC |
| S2-wms-combined_181391  | Unassigned | Unassigned | Unassigned | Outlier                         | SHHC |
| S2-wms-combined_181849  | Unassigned | Unassigned | Unassigned | Overlap (VC_1221/VC_1237)       | SHHC |
| S2-wms-combined_185494  | Unassigned | Unassigned | Unassigned | Outlier                         | SHHC |
| S2-wms-combined_190624  | Unassigned | Unassigned | Unassigned | Outlier                         | SHHC |
| S2-wms-combined_191613  | Unassigned | Unassigned | Unassigned | Outlier                         | SHHC |
| S2-wms-combined_199384  | Unassigned | Unassigned | Unassigned | Outlier                         | SHHC |
| S2-wms-combined_200390  | Unassigned | Unassigned | Unassigned | Outlier                         | SHHC |
| S2-wms-combined_201205  | Unassigned | Unassigned | Unassigned | Overlap (VC_737/VC_738)         | SHHC |
| S2-wms-combined_204225  | Unassigned | Unassigned | Unassigned | Singleton                       | SHHC |
| S2-wms-combined_207000  | Unassigned | Unassigned | Unassigned | Overlap (VC_138/VC_146)         | SHHC |
| S2-wms-combined_208559  | Unassigned | Unassigned | Unassigned | Overlap (VC_652/VC_1481)        | SHHC |
| S2-wms-combined_222535  | Unassigned | Unassigned | Unassigned | Singleton                       | SHHC |
| S2-wms-combined_225908  | Unassigned | Unassigned | Unassigned | Outlier                         | SHHC |
| S2-wms-combined_230282  | Unassigned | Unassigned | Unassigned | Singleton                       | SHHC |
| S2-wms-combined_25727   | Unassigned | Unassigned | Unassigned | Outlier                         | SHHC |
| S2-wms-combined_30750   | Unassigned | Unassigned | Unassigned | Singleton                       | SHHC |
| S2-wms-combined_48661   | Unassigned | Unassigned | Unassigned | Singleton                       | SHHC |
| S2-wms-combined_51446   | Unassigned | Unassigned | Unassigned | Outlier                         | SHHC |
| S2-wms-combined_52006   | Unassigned | Unassigned | Unassigned | Singleton                       | SHHC |
| S2-wms-combined_52568   | Unassigned | Unassigned | Unassigned | Outlier                         | SHHC |
| S2-wms-combined_57293   | Unassigned | Unassigned | Unassigned | Overlap (VC_1221/VC_1237)       | SHHC |
| S2-wms-combined_5791    | Unassigned | Unassigned | Unassigned | Outlier                         | SHHC |



|                          |            |            |            |                                |      |
|--------------------------|------------|------------|------------|--------------------------------|------|
| S2-wms-combined_58563    | Unassigned | Unassigned | Unassigned | Overlap (VC_138/VC_146)        | SHHC |
| S2-wms-combined_62839    | Unassigned | Unassigned | Unassigned | Outlier                        | SHHC |
| S2-wms-combined_64692    | Unassigned | Unassigned | Unassigned | Overlap (VC_817/VC_1210)       | SHHC |
| S2-wms-combined_72725    | Unassigned | Unassigned | Unassigned | Outlier                        | SHHC |
| S2-wms-combined_73327    | Unassigned | Unassigned | Unassigned | Singleton                      | SHHC |
| S2-wms-combined_74387    | Unassigned | Unassigned | Unassigned | Outlier                        | SHHC |
| S2-wms-combined_75144    | Unassigned | Unassigned | Unassigned | Outlier                        | SHHC |
| S2-wms-combined_7756     | Unassigned | Unassigned | Unassigned | Outlier                        | SHHC |
| S2-wms-combined_78670    | Unassigned | Unassigned | Unassigned | Outlier                        | SHHC |
| S2-wms-combined_84608    | Unassigned | Unassigned | Unassigned | Outlier                        | SHHC |
| S2-wms-combined_95987    | Unassigned | Unassigned | Unassigned | Singleton                      | SHHC |
| S2-wms-combined_99446    | Unassigned | Unassigned | Unassigned | Overlap (VC_630/VC_642)        | SHHC |
| S2-wms_124416            | Unassigned | Unassigned | Unassigned | Overlap (VC_607/VC_1238)       | SHHC |
| S2-wms_161986            | Unassigned | Unassigned | Unassigned | Overlap (VC_20/VC_542)         | SHHC |
| S2-wms_192667            | Unassigned | Unassigned | Unassigned | Overlap (VC_20/VC_542)         | SHHC |
| S2-wms_245232            | Unassigned | Unassigned | Unassigned | Overlap (VC_138/VC_146)        | SHHC |
| S2-wms_246296            | Unassigned | Unassigned | Unassigned | Outlier                        | SHHC |
| S2-wms_248324            | Unassigned | Unassigned | Unassigned | Outlier                        | SHHC |
| S2-wms_248327            | Unassigned | Unassigned | Unassigned | Outlier                        | SHHC |
| S2-wms_6424              | Unassigned | Unassigned | Unassigned | Outlier                        | SHHC |
| S3-wms-combined_135428   | Unassigned | Unassigned | Unassigned | Outlier                        | ME   |
| S3-wms-combined_45305    | Unassigned | Unassigned | Unassigned | Outlier                        | ME   |
| S3-wms_94494             | Unassigned | Unassigned | Unassigned | Outlier                        | ME   |
| S4-wms-combined_10758    | Unassigned | Unassigned | Unassigned | Outlier                        | SHHC |
| S4-wms-combined_112093   | Unassigned | Unassigned | Unassigned | Overlap (VC_422/VC_1413)       | SHHC |
| S4-wms-combined_118531   | Unassigned | Unassigned | Unassigned | Outlier                        | SHHC |
| S4-wms-combined_121978   | Unassigned | Unassigned | Unassigned | Outlier                        | SHHC |
| S4-wms-combined_1246     | Unassigned | Unassigned | Unassigned | Outlier                        | SHHC |
| S4-wms-combined_22012    | Unassigned | Unassigned | Unassigned | Outlier                        | SHHC |
| S4-wms-combined_24659    | Unassigned | Unassigned | Unassigned | Singleton                      | SHHC |
| S4-wms-combined_25201    | Unassigned | Unassigned | Unassigned | Outlier                        | SHHC |
| S4-wms-combined_57963    | Unassigned | Unassigned | Unassigned | Overlap (VC_138/VC_146/VC_147) | SHHC |
| S4-wms-combined_83492    | Unassigned | Unassigned | Unassigned | Outlier                        | SHHC |
| S4-wms_114120            | Unassigned | Unassigned | Unassigned | Outlier                        | SHHC |
| S4-wms_50475             | Unassigned | Unassigned | Unassigned | Outlier                        | SHHC |
| S5-wms-combined_106597   | Unassigned | Unassigned | Unassigned | Singleton                      | ME   |
| S5-wms-combined_117095   | Unassigned | Unassigned | Unassigned | Outlier                        | ME   |
| S5-wms-combined_147993   | Unassigned | Unassigned | Unassigned | Overlap (VC_630/VC_642)        | ME   |
| S5-wms-combined_156329   | Unassigned | Unassigned | Unassigned | Outlier                        | ME   |
| S5-wms-combined_161191   | Unassigned | Unassigned | Unassigned | Outlier                        | ME   |
| S5-wms-combined_163165   | Unassigned | Unassigned | Unassigned | Overlap (VC_1485/VC_1486)      | ME   |
| S5-wms-combined_175145   | Unassigned | Unassigned | Unassigned | Outlier                        | ME   |
| S5-wms-combined_179241   | Unassigned | Unassigned | Unassigned | Outlier                        | ME   |
| S5-wms-combined_183113   | Unassigned | Unassigned | Unassigned | Overlap (VC_652/VC_1481)       | ME   |
| S5-wms-combined_197186   | Unassigned | Unassigned | Unassigned | Singleton                      | ME   |
| S5-wms-combined_199135   | Unassigned | Unassigned | Unassigned | Overlap (VC_733/VC_1494)       | ME   |
| S5-wms-combined_204782   | Unassigned | Unassigned | Unassigned | Outlier                        | ME   |
| S5-wms-combined_205046   | Unassigned | Unassigned | Unassigned | Singleton                      | ME   |
| S5-wms-combined_210959   | Unassigned | Unassigned | Unassigned | Overlap (VC_678/VC_679)        | ME   |
| S5-wms-combined_26061    | Unassigned | Unassigned | Unassigned | Overlap (VC_877/VC_1413)       | ME   |
| S5-wms-combined_3201     | Unassigned | Unassigned | Unassigned | Outlier                        | ME   |
| S5-wms-combined_67650    | Unassigned | Unassigned | Unassigned | Overlap (VC_678/VC_679)        | ME   |
| S5-wms-combined_94482    | Unassigned | Unassigned | Unassigned | Outlier                        | ME   |
| S5-wms-combined_94786    | Unassigned | Unassigned | Unassigned | Overlap (VC_630/VC_642)        | ME   |
| S5-wms_10783             | Unassigned | Unassigned | Unassigned | Singleton                      | ME   |
| S5-wms_123499            | Unassigned | Unassigned | Unassigned | Singleton                      | ME   |
| S5-wms_164032            | Unassigned | Unassigned | Unassigned | Outlier                        | ME   |
| S5-wms_212596            | Unassigned | Unassigned | Unassigned | Singleton                      | ME   |
| S5-wms_62679             | Unassigned | Unassigned | Unassigned | Overlap (VC_735/VC_915)        | ME   |
| S6-wms-combined_110950   | Unassigned | Unassigned | Unassigned | Overlap (VC_1221/VC_1237)      | SHHC |
| S6-wms-combined_128972   | Unassigned | Unassigned | Unassigned | Overlap (VC_651/VC_736)        | SHHC |
| S6-wms-combined_138710   | Unassigned | Unassigned | Unassigned | Overlap (VC_1221/VC_1237)      | SHHC |
| S6-wms-combined_56464    | Unassigned | Unassigned | Unassigned | Outlier                        | SHHC |
| S6-wms-combined_65225    | Unassigned | Unassigned | Unassigned | Singleton                      | SHHC |
| S6-wms-combined_745      | Unassigned | Unassigned | Unassigned | Singleton                      | SHHC |
| S6-wms-combined_88414    | Unassigned | Unassigned | Unassigned | Overlap (VC_877/VC_1413)       | SHHC |
| S6-wms_140743            | Unassigned | Unassigned | Unassigned | Outlier                        | SHHC |
| S7-wms-combined_106253   | Unassigned | Unassigned | Unassigned | Outlier                        | ME   |
| S7-wms-combined_107679_1 | Unassigned | Unassigned | Unassigned | Outlier                        | ME   |
| S7-wms-combined_121062   | Unassigned | Unassigned | Unassigned | Singleton                      | ME   |
| S7-wms-combined_123085   | Unassigned | Unassigned | Unassigned | Singleton                      | ME   |
| S7-wms-combined_134452   | Unassigned | Unassigned | Unassigned | Singleton                      | ME   |
| S7-wms-combined_135154   | Unassigned | Unassigned | Unassigned | Outlier                        | ME   |
| S7-wms-combined_137858   | Unassigned | Unassigned | Unassigned | Overlap (VC_1221/VC_1237)      | ME   |
| S7-wms-combined_14529    | Unassigned | Unassigned | Unassigned | Outlier                        | ME   |
| S7-wms-combined_156351   | Unassigned | Unassigned | Unassigned | Outlier                        | ME   |
| S7-wms-combined_157434   | Unassigned | Unassigned | Unassigned | Singleton                      | ME   |
| S7-wms-combined_167867   | Unassigned | Unassigned | Unassigned | Singleton                      | ME   |
| S7-wms-combined_174935   | Unassigned | Unassigned | Unassigned | Outlier                        | ME   |
| S7-wms-combined_190281   | Unassigned | Unassigned | Unassigned | Outlier                        | ME   |
| S7-wms-combined_2122     | Unassigned | Unassigned | Unassigned | Outlier                        | ME   |



|                        |            |            |            |                           |      |
|------------------------|------------|------------|------------|---------------------------|------|
| S7-wms-combined_21693  | Unassigned | Unassigned | Unassigned | Outlier                   | ME   |
| S7-wms-combined_217226 | Unassigned | Unassigned | Unassigned | Outlier                   | ME   |
| S7-wms-combined_218379 | Unassigned | Unassigned | Unassigned | Outlier                   | ME   |
| S7-wms-combined_224523 | Unassigned | Unassigned | Unassigned | Outlier                   | ME   |
| S7-wms-combined_3669   | Unassigned | Unassigned | Unassigned | Outlier                   | ME   |
| S7-wms-combined_69024  | Unassigned | Unassigned | Unassigned | Outlier                   | ME   |
| S7-wms-combined_71592  | Unassigned | Unassigned | Unassigned | Outlier                   | ME   |
| S7-wms-combined_74829  | Unassigned | Unassigned | Unassigned | Outlier                   | ME   |
| S7-wms_151112          | Unassigned | Unassigned | Unassigned | Outlier                   | ME   |
| S7-wms_76437           | Unassigned | Unassigned | Unassigned | Outlier                   | ME   |
| S8-wms-combined_117281 | Unassigned | Unassigned | Unassigned | Outlier                   | SHHC |
| S8-wms-combined_164289 | Unassigned | Unassigned | Unassigned | Outlier                   | SHHC |
| S8-wms-combined_180957 | Unassigned | Unassigned | Unassigned | Outlier                   | SHHC |
| S8-wms-combined_185611 | Unassigned | Unassigned | Unassigned | Outlier                   | SHHC |
| S8-wms-combined_219796 | Unassigned | Unassigned | Unassigned | Overlap (VC_138/VC_146)   | SHHC |
| S8-wms-combined_23583  | Unassigned | Unassigned | Unassigned | Outlier                   | SHHC |
| S8-wms-combined_239791 | Unassigned | Unassigned | Unassigned | Outlier                   | SHHC |
| S8-wms-combined_246389 | Unassigned | Unassigned | Unassigned | Overlap (VC_817/VC_1210)  | SHHC |
| S8-wms-combined_48046  | Unassigned | Unassigned | Unassigned | Outlier                   | SHHC |
| S8-wms-combined_74275  | Unassigned | Unassigned | Unassigned | Outlier                   | SHHC |
| S8-wms-combined_81597  | Unassigned | Unassigned | Unassigned | Outlier                   | SHHC |
| S8-wms_113693          | Unassigned | Unassigned | Unassigned | Outlier                   | SHHC |
| S8-wms_190781          | Unassigned | Unassigned | Unassigned | Outlier                   | SHHC |
| S8-wms_20528           | Unassigned | Unassigned | Unassigned | Overlap (VC_138/VC_146)   | SHHC |
| S8-wms_270             | Unassigned | Unassigned | Unassigned | Overlap (VC_1244/VC_1245) | SHHC |
| S8-wms_58515           | Unassigned | Unassigned | Unassigned | Outlier                   | SHHC |
| S9-wms-combined_105822 | Unassigned | Unassigned | Unassigned | Overlap (VC_138/VC_146)   | ME   |
| S9-wms-combined_109322 | Unassigned | Unassigned | Unassigned | Outlier                   | ME   |
| S9-wms-combined_10990  | Unassigned | Unassigned | Unassigned | Overlap (VC_1489/VC_1494) | ME   |
| S9-wms-combined_122742 | Unassigned | Unassigned | Unassigned | Outlier                   | ME   |
| S9-wms-combined_124857 | Unassigned | Unassigned | Unassigned | Outlier                   | ME   |
| S9-wms-combined_2042   | Unassigned | Unassigned | Unassigned | Outlier                   | ME   |
| S9-wms-combined_27311  | Unassigned | Unassigned | Unassigned | Singleton                 | ME   |
| S9-wms-combined_3461   | Unassigned | Unassigned | Unassigned | Outlier                   | ME   |
| S9-wms-combined_93232  | Unassigned | Unassigned | Unassigned | Outlier                   | ME   |
| S9-wms-combined_97755  | Unassigned | Unassigned | Unassigned | Overlap (VC_138/VC_146)   | ME   |
| S9-wms_10480           | Unassigned | Unassigned | Unassigned | Singleton                 | ME   |
| S9-wms_114971          | Unassigned | Unassigned | Unassigned | Outlier                   | ME   |
| SPVDNA                 | Unassigned | Unassigned | Unassigned | Singleton                 | Ref  |
| X51522                 | Unassigned | Unassigned | Unassigned | Singleton                 | Ref  |
| X58839                 | Unassigned | Unassigned | Unassigned | Singleton                 | Ref  |
| X80191                 | Unassigned | Unassigned | Unassigned | Outlier                   | Ref  |
| X96987                 | Unassigned | Unassigned | Unassigned | Overlap (VC_818/VC_820)   | Ref  |



Table S8-3. VCs\_reference\_genomes\_only

| VC        | Members                                                                                                                                                                                                                                                                                                                                                                                                                                                                                                                                                                       |
|-----------|-------------------------------------------------------------------------------------------------------------------------------------------------------------------------------------------------------------------------------------------------------------------------------------------------------------------------------------------------------------------------------------------------------------------------------------------------------------------------------------------------------------------------------------------------------------------------------|
| VC_0_0    | AB002632,KC357596,OP297622                                                                                                                                                                                                                                                                                                                                                                                                                                                                                                                                                    |
| VC_1_0    | AB276040,AB981169,GU911303,KP966108,MG747435,MT701591,ON170026,ON170032,ON170053,ON170059,ON170061,ON170067,ON170070,ON170073,ON170076,ON170078,ON170080,ON170081,ON170082,ON170084,ON170128,ON170130,ON170131,ON170135,ON170151,ON170173,ON170210,ON170213,ON170227,ON170230,ON170233,ON170235,ON170237,ON170239,ON170241,ON170243,ON170258,ON170261,ON170263,ON170266,ON170268,ON170270,ON170272,ON170276,ON170304,ON170305,ON170321,ON170325,ON170329,ON170344,ON170347,ON170348,ON170351,ON642070                                                                         |
| VC_10_0   | AP011955,AP011956,AY508486,CP062430,CP062436,CP062447,DQ530361,GQ398772,KC595278,KF831354,KJ452292,KJ596420,KT809368,KT809369,KT878766,KY653123,MG029510,MG029512,MH384259,MH401416,MW924889,OP038320,OPI36135,OP328423,OP493558                                                                                                                                                                                                                                                                                                                                              |
| VC_100_0  | KC330679,KC330680,KC330681,KC330682,KC330683,KC330684,KF669648,KF669651,KF669659,KU836751,MG983742,MH884513,MN727882,MT422786,MTS14532                                                                                                                                                                                                                                                                                                                                                                                                                                        |
| VC_1000_0 | MG945161,MK249131,MK249144,MK249156,MK249159,MK249160,MK249167,MK249179,MK249181,MZ364226,MZ364241,MZ364245,MZ364246,MZ364247,MZ364249,MZ364250,MZ364260,MZ364263,MZ364266,MZ364270                                                                                                                                                                                                                                                                                                                                                                                           |
| VC_1002_0 | MT152698,MZ334527                                                                                                                                                                                                                                                                                                                                                                                                                                                                                                                                                             |
| VC_1003_0 | MN698240,MN698245,MN698246,MN698248                                                                                                                                                                                                                                                                                                                                                                                                                                                                                                                                           |
| VC_1004_0 | MW202462,MW202544                                                                                                                                                                                                                                                                                                                                                                                                                                                                                                                                                             |
| VC_1006_0 | KC595511,KT070866,MG967616,MG967617,MG967618,MK288022,MW392801,MW392802                                                                                                                                                                                                                                                                                                                                                                                                                                                                                                       |
| VC_1007_0 | MT074134,MT074135,MT074143,MT074144,MT074145,MT074147,MT074148,MT074149,MT074150,MT074151,MT074152,MT074153,MT074154,MT074155,MT074156,MT074157,MT074158,MT074159,MT074160                                                                                                                                                                                                                                                                                                                                                                                                    |
| VC_101_0  | KY565347,MH884514,OP341625                                                                                                                                                                                                                                                                                                                                                                                                                                                                                                                                                    |
| VC_1011_0 | KC821606,KC821623,KC821628,KC821631,MT732445,MT732446,MT732447,MT732448,MT732449                                                                                                                                                                                                                                                                                                                                                                                                                                                                                              |
| VC_1012_0 | KC821608,KC821620,KC821622,KC821633                                                                                                                                                                                                                                                                                                                                                                                                                                                                                                                                           |
| VC_1013_0 | MN812206,MN812207,MN812208,MN812209,MN812210,MN812212,MN812213,MN812214,MN812215,MN812216,MN812217,MN812218,MN812219,MN812220,MN812221,MN812222,MN812223,MN812224,MN812225,MN812226,MN812227,MN812228,MN812229,MN812230,MN812231,MN812232,MN812233,MN812234,MN812235,MN812236,MN812237,MN812238,MN812239,MN812240,MN812241                                                                                                                                                                                                                                                    |
| VC_1015_0 | MT497017,MT497065,MT497066,MT497067,MT497068,MT497069,MT497070,MT497071,MT497072,MT497073,MT497074,MT497075,MT497076,MT497077,MT497078,MT497079,MT497080,MT497081,MT497082,MT497083,MT497084,MT497085,MT497086,MT497087,MT497088,MT497089,MT497090,MT497091,MT497092,MT497093,MT497094,MT497095,MT497096,MT497097,MT497098,MT497099,MT497100,MT497101,MT497102,MT497103,MT497104,MT497105,MT497106,MT497107,MT497108,MT497109,MT497110,MT497111,MT497112,MT497113,MT497114,MT497115,MT497116,MT497117,MT497118,MT497119,MT497120,MT497121,MT497122,MT497123,MT497124,MT497125 |
| VC_1016_0 | MT732435,MT732436,MT732437,MT732438,MT732439,MT732440,MT732441,MT732442                                                                                                                                                                                                                                                                                                                                                                                                                                                                                                       |
| VC_1017_0 | KC821609,KC821632,KT962245,KT962246,KT962247                                                                                                                                                                                                                                                                                                                                                                                                                                                                                                                                  |
| VC_1018_0 | KJ003983,MT774389                                                                                                                                                                                                                                                                                                                                                                                                                                                                                                                                                             |
| VC_1018_1 | MH675552,MT074136,MT074138,MT774378,MT774385,MT774387,MT774388,MT774390,MT774391,MT774392                                                                                                                                                                                                                                                                                                                                                                                                                                                                                     |
| VC_1019_0 | KC821612,KC821614,MT732432,MT732433,MT732434                                                                                                                                                                                                                                                                                                                                                                                                                                                                                                                                  |
| VC_102_0  | KJ159566,KT001912                                                                                                                                                                                                                                                                                                                                                                                                                                                                                                                                                             |
| VC_1020_0 | KC821613,KC821615,KC821617,KC821619,KC821627                                                                                                                                                                                                                                                                                                                                                                                                                                                                                                                                  |
| VC_1021_0 | MK764442,MK764445,MK764448,MN812203,MN812204,MN812205,MW421581,MW421582,MW421583,MW421584                                                                                                                                                                                                                                                                                                                                                                                                                                                                                     |
| VC_1022_0 | KY206887,MK017819,MN417334,OP381444                                                                                                                                                                                                                                                                                                                                                                                                                                                                                                                                           |
| VC_1023_0 | KC959568,KU599887,KU599888,KU599889,MK764437,MK764440,MK764450,MW421576                                                                                                                                                                                                                                                                                                                                                                                                                                                                                                       |
| VC_1024_0 | KC960489,KF981876                                                                                                                                                                                                                                                                                                                                                                                                                                                                                                                                                             |
| VC_1025_0 | KF005317,KF005318,KF005319,KF005320                                                                                                                                                                                                                                                                                                                                                                                                                                                                                                                                           |
| VC_1026_0 | KX257490,MW805362                                                                                                                                                                                                                                                                                                                                                                                                                                                                                                                                                             |
| VC_1027_0 | KF322026,KF800937,KJ502657,KY290756,KY626176,KY626177,MF481197,MG018929,MG545917,MH113812,MH113813,MH113814,MH113815,MK455769,MK455770,MK820013,MN807240,MT941682,MW451247,MW865291                                                                                                                                                                                                                                                                                                                                                                                           |
| VC_1028_0 | KU245542,OK638201,OK638202,OK638203,OL343755,OL473897,OL622073,ON857939                                                                                                                                                                                                                                                                                                                                                                                                                                                                                                       |
| VC_1029_0 | MW677511,MW677527,OP009274,OP009281                                                                                                                                                                                                                                                                                                                                                                                                                                                                                                                                           |
| VC_103_0  | MN176222,MN176223,MN176224,MN176225,MN176226,MN176229                                                                                                                                                                                                                                                                                                                                                                                                                                                                                                                         |
| VC_1030_0 | MG596799,MK473373,MZ605292                                                                                                                                                                                                                                                                                                                                                                                                                                                                                                                                                    |
| VC_1031_0 | MN096357,MN096358,MT818426,ON526969                                                                                                                                                                                                                                                                                                                                                                                                                                                                                                                                           |
| VC_1032_0 | KF669655,KF669657,KF669660,KM236247,KM236248,KP411017,KT001911                                                                                                                                                                                                                                                                                                                                                                                                                                                                                                                |
| VC_1034_0 | ON645346,OP580516                                                                                                                                                                                                                                                                                                                                                                                                                                                                                                                                                             |
| VC_1034_1 | KF692088                                                                                                                                                                                                                                                                                                                                                                                                                                                                                                                                                                      |
| VC_1035_0 | MH834603,MH834605,MH834611,MH834614,MH834623,ON970561                                                                                                                                                                                                                                                                                                                                                                                                                                                                                                                         |
| VC_1036_0 | MH834598,MH834612,MH834625,MH910036,MH910037,MH910041,MW712719,ON724017,ON970598,OP434442,OP434463                                                                                                                                                                                                                                                                                                                                                                                                                                                                            |
| VC_1037_0 | MH834621,MH834627,MK392368,MZI50784,MZ274308,ON392166                                                                                                                                                                                                                                                                                                                                                                                                                                                                                                                         |
| VC_1039_0 | KF751793,KF751794,KF751795,KF751796,KF751797                                                                                                                                                                                                                                                                                                                                                                                                                                                                                                                                  |
| VC_104_0  | MH752385,MN013088,MN176219,MN176227,MN176228,X97918                                                                                                                                                                                                                                                                                                                                                                                                                                                                                                                           |
| VC_1040_0 | KT876725,KU599880,KU599881,KU599882,KU599883,KU599884,KU599885,MK764436,MK764438,MK764439,MK764443,MK764444,MK764446,MK764447,OK268422,OK268423,OK268424,OK268425,OK268426,OK268427,OK340817,OK340818,OK340819                                                                                                                                                                                                                                                                                                                                                                |
| VC_1041_0 | MG592391,MG592421,MG592436,MG592443,MG592445,MG592449,MG592661,OX241561,OX241569                                                                                                                                                                                                                                                                                                                                                                                                                                                                                              |
| VC_1043_0 | MN183282,MT771347                                                                                                                                                                                                                                                                                                                                                                                                                                                                                                                                                             |
| VC_1044_0 | OM913586,ON970564,ON970608                                                                                                                                                                                                                                                                                                                                                                                                                                                                                                                                                    |
| VC_1045_0 | MN988468,MN988516                                                                                                                                                                                                                                                                                                                                                                                                                                                                                                                                                             |
| VC_1046_0 | KJ510413,KM591905,MF155936,MG925349,MH001451,MK494089,MN735432                                                                                                                                                                                                                                                                                                                                                                                                                                                                                                                |
| VC_1047_0 | MW584157,MW584173,MW584189,MW584206,MW584209                                                                                                                                                                                                                                                                                                                                                                                                                                                                                                                                  |
| VC_1048_0 | KJ617393,LK392619,Z47794                                                                                                                                                                                                                                                                                                                                                                                                                                                                                                                                                      |
| VC_1049_0 | KJ802832,KX987158,KY002061,MH586730,MZ726797,OL604152,ON602746,OP617744                                                                                                                                                                                                                                                                                                                                                                                                                                                                                                       |
| VC_1050_0 | MG592411,MG592538,MG592563,MG592564,MG592565,MG592571,MG592632,MG592633,MG592634,MG592635,MG592636,MG592637,MG592638,MG592639,MG592640,MG592642,MG592645,MG592646,MG592648,MG592649,MG592650,MG592651,MG592652,MG592653                                                                                                                                                                                                                                                                                                                                                       |
| VC_1050_1 | MG592397,MG592406,MG592407,MG592408,MG592416,MG592417,MG592428,MG592463,MG592464,MG592471,MG592475,MG592476,MG592492,MG592493,MG592528,MG592601,MG592602,MG592617,MG592618,MG592655,MH925092,MW824418,MW824430,MW824432,MW824433,MW824434,OX241427,OX241556,OX241563                                                                                                                                                                                                                                                                                                          |
| VC_1051_0 | KM058087,MW900438                                                                                                                                                                                                                                                                                                                                                                                                                                                                                                                                                             |
| VC_1052_0 | MT234342,MT234343                                                                                                                                                                                                                                                                                                                                                                                                                                                                                                                                                             |
| VC_1052_1 | KP881232                                                                                                                                                                                                                                                                                                                                                                                                                                                                                                                                                                      |
| VC_1052_2 | MF403007                                                                                                                                                                                                                                                                                                                                                                                                                                                                                                                                                                      |
| VC_1052_3 | KM199770,MN549360,MN549361,MT778837,MT778839                                                                                                                                                                                                                                                                                                                                                                                                                                                                                                                                  |
| VC_1052_4 | MN988486,MN988509,MN988520,MN988532,MN988534,MN988553                                                                                                                                                                                                                                                                                                                                                                                                                                                                                                                         |
| VC_1053_0 | MG945594                                                                                                                                                                                                                                                                                                                                                                                                                                                                                                                                                                      |
| VC_1054_0 | KM589498,KT264826,KT264827,MG945473,MG945570,MH931003,MK496723,MN379633,MN379651,OM522999,OM523001,OM869624                                                                                                                                                                                                                                                                                                                                                                                                                                                                   |
| VC_1056_0 | KT264807,KT264829,KX513869,MG945560                                                                                                                                                                                                                                                                                                                                                                                                                                                                                                                                           |
| VC_1058_0 | OM869532,OM869702                                                                                                                                                                                                                                                                                                                                                                                                                                                                                                                                                             |
| VC_1059_0 | MG945835,MH992170,MH992193                                                                                                                                                                                                                                                                                                                                                                                                                                                                                                                                                    |
| VC_1061_0 | KM589499,KM589507                                                                                                                                                                                                                                                                                                                                                                                                                                                                                                                                                             |
| VC_1062_0 | KM589500,KM589503,KM589504,KM589505,KM589509,KM589510,KM589512,KM589513,KP087948,MG945178,MG945463,MH572367,MH572368,MH572377,MH572378,MH572379,MH572459,MH572460,MH572461,MH572462,MH572463,MH572465,MH992180,MK249133,MK249138,MK249191,MK249192,MK249207,MK249208,MK249228,MK249232,MK765579,MK765582,MK765639,MK765642,MK765643,MK765644,MK765646,MN311488,MN311489,MN311490,MN311491,MZ364242,OL617032,OL617033                                                                                                                                                          |



VC\_1066\_0 KM589508,KT264808,KT264809,KT264810,MH992165,MK249127,MK249128,MK249129,MK249139,MK249149,MK249150,MK249153,MK249154,MK249155,MK249158,MK249162,MK249166,MK249168,MK249174,MK249176,MK249178,MK249180,MK249188,MK249192,MK249194,MK249195, MK249196,MK249198,MK249204,MK249212,MK249214,MK249219,MN862338,MZ364222,MZ364223,MZ364232,MZ364248,MZ364254,MZ364255,MZ364261,MZ364262,MZ364264,MZ364265,MZ364268,MZ364269,MZ364271,MZ364272,MZ364273,MZ364275,MZ364276,MZ364278

VC\_1067\_0 MK249132,MK249205

VC\_1068\_0 KM589514,MK249222,MZ364231,MZ364280,MZ364284

VC\_1069\_0 KM589515,KM589516,MT135405,OM869497

VC\_107\_0 OP341624,OP341626,OP341627,OP341628,OP341630

VC\_1070\_0 MH153807,MH153812

VC\_1070\_1 KX774321

VC\_1071\_0 MH576964,MH576965,MH576968,MH590597,MH590599,MH727564,MK359332,MK359351,MK801722,MN369750,MN369757,MN428060,MN484599,MW291014,MW507134,ON260819,ON260828,ON970579,ON970590,OP021680

VC\_1071\_1 OL829978

VC\_1071\_2 MF155946,MT310865,MT684590,MT897905,ON970591

VC\_1071\_3 KM652554,MF347636,MF347637,MF347638,MF347639,MF358541,MF358542,MK460248,MK494112,MN977711,MN096371,MN369743,MW507136,MZ2958750,OK310502,ON108650

VC\_1071\_4 MN444876

VC\_1071\_5 MT7111976

VC\_1072\_0 MG757153,MK620896

VC\_1072\_1 MT024865,MT024872

VC\_1072\_2 MH590589,MH651172,MW365952,MZ820095,ON456343

VC\_1072\_3 MK061412,MT114162,MW435853,MZ820093,MZ820094,ON208830

VC\_1072\_4 MH536811,MH536814,MN369754,MT952852

VC\_1072\_5 MT684598,MW822145,ON645339

VC\_1073\_0 KT365401,KU160651,KU160656,KU160668,KU647629,MF189176,MF189177,MF189178,MF349077,MF377441,MF377442,MH825703,MK919479,MN183283,MT024868,MT114161,MT310895,MT776811,MT889388,MW862982,OK999980,ON970601

VC\_1074\_0 KM879463,KU160660,KX522650,KX670786,KX670787,KX855961,KX855962,MF185718,MF185721,MF185723,MF185724,MF185725,MF668274,MH744419,MK494107,MN204499,MN204503,MN234234,MN703411

VC\_1075\_0 MT498055,MW601223,MZ747522,OL742560

VC\_1077\_0 KP087938,KP087942,MC883726,MC945129,MC945206,MC945670,MC945836,MC945840,MC945846,MH572362,MH572410,MH572411,MH572412,MH572486,MH572521,MH931004,MH992163,MH992164,MH992192,MH992199,MH992202,MH992206,MH992208,MH992214,MH992215,MH992216,MH992217 ,MH992219,MH992220,MH992222,MK765645,MN862346,MW202445,MW202609,MW202760,MW202819,MZ089752,MZ364224,MZ364225,MZ364227,MZ364277,MZ364279,MZ364283,MZ364285,MZ364286,MZ364291,OL617030,OL617031

VC\_1079\_0 MH572360,MH572361,MH572409,MH572457,MH572482,MH572483

VC\_108\_0 AB712291,JH962497,JF731128,KF192053,KJ094032,KJ127303,KT932699,KY303907,KY472224,LC547238,MH618488,MH791415,MK570225,MK721189,MK721194,MK800154,MN103542,MN871443,MN939408,MW677132,MZ333457,OL505085,OL870612,ON086985,ON113171,ON113172,ON113173,ON1131 74,ON113175,ON113177,ON113178,ON113179,ON113180

VC\_1081\_0 MN379632

VC\_1082\_0 MH572366,MW202464,MW202671

VC\_1084\_0 MH572287,MH572288,MH572467,MH572468,MH572496,MH572497,MH572498,MH572499,MH572500

VC\_1085\_0 KT264812,MC945475

VC\_1086\_0 KP087943,KP087951,KP087957

VC\_1087\_0 KP087953,MH572371,MH572373,MH572380,MK249215

VC\_1088\_0 KP087955,MH572364,MH572458

VC\_1089\_0 MH572489,MW202618

VC\_109\_0 MZ398135,MZ398136,MZ399596

VC\_1090\_0 KP202971,KT001914,MF098558,ON323491

VC\_1091\_0 KP836355,KP836356

VC\_1092\_0 MW314851,MW314853,MW314857,MW584149,MW584151,MW584184,MW584193,MW584194,MW584198,MW584200,MW584205,MW584210

VC\_1093\_0 KU963250,MF919514,MG812487,MH153809,MH450129,MH479924,MH651166,MH651168,MH976506,MH976507,MH976508,MH976509,MH976510,MH976511,MH976512,MH976513,MH976514,MH976518,MH976519,MK937594,MK937601,MK967396,MK977702,MN329673,MN329677,MT498035,MT639640

VC\_1095\_0 ,MT723934,MT723937,MT723941,MW822146,MW924645,MZ322015,MZ681510,ON081332,ON456336,ON637761,ONT24014,OP172877,OP434456

VC\_1096\_0 KU963253,MH669000,MK937607,MK937611,MN586026,MN586028,MN586047,MT498036,MW314847,MZ322009,MZ322020,ON392159,ON456337,ON456349,ON755186,OP068342

VC\_1098\_0 KR063280,MK279853,MN586022,MZ830089,ON755184

VC\_1098\_1 MK814760,MK894436,MN484601,OP297539

VC\_1099\_0 KR063281

VC\_1099\_1 MN234206,MN234211

VC\_11\_0 OK040794

VC\_110\_0 AP019560,AP019561,AP019562,KX827368,KX827369,KX827370,MF428478,MF428479,MF428480,MF428481,MK075003,MK075006,MN028536,MT423823,MT423824,MT373551,OM373552,OM373553,OP168678

VC\_1100\_0 FR687252,MZ333135,OM513679,OM513680

VC\_1100\_1 MN908685,MZ150783

VC\_1100\_2 OK040793,ON637770

VC\_1100\_3 OK040790

VC\_1101\_0 OP068343

VC\_1101\_1 KR136259,KR136260

VC\_1103\_0 KR704913,KR704915

VC\_1104\_0 KT264749,KT264750,KT264751,KT264752,KT264753,KT264754,KT264755,KT264756,KT264757,KT264758,KT264759,KT264760,KT264761,KT264762,KT264763,KT264764,KT264765,KT264766,KT264767,KT264768,KT264769,KT264779,KX513865,MC025518,MC641179,MC641180,MC641186,MC883717, MC945153,MC945158,MC945163,MC945190,MC945203,MC945205,MC945207,MC945227,MC945237,MC945238,MC945318,MC945325,MC945330,MC945333,MC945346,MC945351,MC945355,MC945361,MC945387,MC945393,MC945398,MC945402,MC945407,MC945415,MC94542 4,MC945429,MC945435,MC945438,MC945443,MC945449,MC945461,MC945467,MC945476,MC945486,MC945499,MC945508,MC945517,MC945526,MC945541,MC945548,MC945559,MC945565,MC945566,MC945570,MC945586,MC945587,MC945589,MC945596,MC945602,MC945646,MC945671,MC945 673,MC945674,MC945681,MC945699,MC945705,MC945708,MC945710,MC945728,MC945731,MC945744,MC945758,MC945761,MC945765,MC945768,MC945770,MC945786,MC945787,MC945793,MC945796,MC945801,MC945802,MC945820,MC945853,MC945855,MC945862,MC945864,MC9 45869,MK765620,MT135257,MT135263,MT135264,MT135272,MT135273,MT135278,MT135338,MZ089765,MZ089767,MZ089774,MZ089775,OM869524,OM869525,OM869526,OM869527,OM869528,OM869531,OM869533,OM869534,OM869535,OM869537,OM869538,OM869543,OM869546,OM869547,OM8 69550,OM869606,OM869635,OM869642,OM869643,OM869644,OM869645,OM869664,OM869667,OM869698,OM869700,OM869701,OM869703,OM869704,OP549869,OP549872,OP549875,OP549876

VC\_1105\_0 MC945597,MK496743,MK496744

VC\_1108\_0 KT264775,MG883718,MC945386,MC945775

VC\_111\_0 AB716666,GQ413938,KF765493,KM576124,KP708985,KP708986,KT367886,KT964103,KU666550,KX2211991,KX237514,KX587949,KX856662,KY000081,KY385423,KY684082,MF612071,MC972768,MH885472,MK135468,MK562503,MK598851,MK693005,MN101217,MN101219,MN101220,MN116494,MN17 6572,MN176573,MN380459,MN794000,MN794001,MN794002,MN794003,MT090077,MT197175,MT197176,MT360680,MT559526,MT559527,MT682065,MT701589,MT939252,MW590329,MZ208805,MZ242864,MZ571827,MZ602146,MZ634338,MZ634339,MZ634340,MZ634342,MZ634343,OK562429,OK583 892,OK583893,OL362278,OL362279,OL474125,OL976437,OL979478,OL979479,OM864357,ON132389,ON146449,ON165415,ON602723,ON602724,ON602725,ON602726,ON602727,ON602728,ON602732,ON602739,ON602740,ON602743,ON602748,ON602752,ON602754,ON602756,ON602757,ON602761,ON60 2762,ON602767,ON809559,OP114731,OP413829,OU509533,OU509534,OX335379,OX335428

VC\_1110\_0 MC945181,MC945211,MC945232,MC945718,MC945783,MT135261,MT135334,MZ089771

VC\_1111\_0 MC945489,MT135282

VC\_1112\_0 MK496719,MK496738

VC\_1113\_0 MC945591

VC\_1114\_0 MC945131,MC945742

VC\_1116\_0 KT264776,MG883719,MC945139,MC945339,MC945394,MC945403,MC945452,MC945550,MC945645,MC945736,MC945740,MC945771,MC945819,OP209174

VC\_1117\_0 KT264781,MC945481,MC945807,MT135256,MT135266

VC\_1119\_0 KT264782,KT264783,KX513866,KX513870,MC945154,MC945472,MC945534,MC945613,MC945826,MK496754,MK496805,MK496812,MK496813,MK765559,MK765603,MK765621,MK765669,MZ089773,OM869503



VC\_112\_0 KF319020,KM819694,MC575418,MC575419,MK387869,MW358930,OL416096,OM234793  
VC\_1120\_0 MG945704,MZ089755,MZ089759,MZ089761,MZ089764,OM869627,OM869629  
VC\_1122\_0 KT264785,KX513873,MC945186,MC945569,MC945689,MC945797,MC945870,MN379630,MN379640,MT135351  
VC\_1123\_0 KT264784,KX513864  
VC\_1124\_0 KT264798,KT264799,KT264800,KT264801,MC945135,MC945136,MC945157,MC945391,MC945867,MT135258  
VC\_1125\_0 KT264796,KT264797,MC883722,MC945286,MC945319,MC945338,MC945347,MC945385,MC945389,MC945410,MC945416,MC945437,MC945538,MC945635,MC945639,MC945746,MC945767,MC945858,OM869558,OM869663  
VC\_1126\_0 KT264788,KT264789,KT264790,MC945138,MC945381,MC945382,MC945780,MT135259  
VC\_1127\_0 KT264791,KT264792,KT264793,KX513868,KX513877,MC945162,MC945233,MC945334,MC945383,MC945388,MC945430,MC945447,MC945514,MC945642,MC945694,MC945753,MC945781,MT135277,MZ821031  
VC\_1128\_0 KT264794,MC945231  
VC\_113\_0 AB720063,AP008979,AY299121,DQ777876,EU717894,MW934263,MZ701794,OK258140,OM913894  
VC\_1132\_0 KT264795,MC945738  
VC\_1133\_0 MG641184,MZ089778,OM869517,OM869640  
VC\_1134\_0 MK496714,MK496779,MK496792,MZ089777,OM869545  
VC\_1136\_0 KT264803,MC945142  
VC\_1137\_0 KT264802,MC945620,MC945741  
VC\_1138\_0 KT264805,MC945519,MC945693,MC945809  
VC\_1139\_0 KT264806,MC945320,MC945561,MC945721  
VC\_1140\_0 KT264820,KT264821,MC945644,MK765602  
VC\_1143\_0 KT264818,KT264819,KX513867,KX513872,KX513874,MC945573,MC945759,MC945760,MC945811  
VC\_1144\_0 MG883714,MC945364,MC945525,MC945719,MC945805,MT135337,MT135424  
VC\_1145\_0 OM869513,OM869516,OM869519,OM869634,OM869637  
VC\_1146\_0 MG945234,MC945405,MC945827  
VC\_1147\_0 KT264822,KT264830,MK496745  
VC\_1148\_0 KT264823,KT264824,KT264825,MC945179,MC945357,MC945413,MC945506,MC945507,MC945609,MC945676,MC945706,MC945764,MC945817,MT135267,MT135271,MT135281  
VC\_1149\_0 MG945441,MC945487,MC945505,MT135255,MT135275  
VC\_115\_0 MG592523,OX241425  
VC\_1151\_0 KT264828,MC945228,MC945426,MC945726,MC945754,MC945816,OP549870,OP549873,OP549877  
VC\_1152\_0 MG945204,MC945727,MC945785,MC945810  
VC\_1153\_0 KT264831,MN379641  
VC\_1154\_0 KT264833,MC945418,MC945549,MC945747,OM869677  
VC\_1155\_0 KT264834,MC945678  
VC\_1156\_0 KT755656,MH431938,MH454076,MH454080,MH460824,MH460825,MH460826,MH460827  
VC\_1157\_0 KT876724,KT876726,KU599877,KU599878,KU599886,MK764441,MK764449,MW421577,MW421578,MW421579,MW421580,MW442825,MW442826,MW442827,MW442828,MW442829,MW442830,MW448539,MW448540,MW448541,OK340820,OK340821,OK340822  
VC\_1158\_0 MH576962,MK620894,MW291021  
VC\_1158\_1 MH744418,MT310898  
VC\_1159\_0 MP668275,MZ955870,OV696619  
VC\_116\_0 AB720064,LR743523,LR743528,LR743529,LR743531,MW802488,MW822535,MW822536,MW822537,MW822538,MW822539,OK913679,OK913680  
VC\_1160\_0 KU160640,KU160643,KU160648,KU160649,KU160652,KU160653,KU160659,KU160661,KU160662,KU160671,KU160672,KX576640,KX576641,KX621004,KX621005,KX688102,KX688103,MP140400,MP140404,MP140407,MP140424,MP140425,MP668285,MG198779,MG198781,MI98782,MZ210948,MH450117,MH450118,MH450121,MH450131,MH744421,MK112526,MK112528,MK112529,MK112531,MK112535,MK112538,MK279844,MK279845,MK279847,MK279851,MK279854,MK279856,MK279860,MK279862,MK279863,MK279867,MK279868,MK279869,MK279872,MK279874,MK279875,MK279876,MK279880,MK279884,MK279886,MK279892,MK279896,MK279901,MK279907,MK660714,MK814749,MK919476,MK919484,MN586061,MN735429,MN813680,MT498045,MT498050,MW314848,OP434444  
VC\_1161\_0 KX557278,MT771339  
VC\_1162\_0 MK016495,MK016497,MK737942,MN369765,MT310855,MT498057,MZ150782,MZ747515,ON260821,ON970583  
VC\_1163\_0 MG839027,MC925343,MC925345,MC925347,MC944216,MC944218,MC944226,MH513982,MH590604,MH590606,MK308637,MK620901,MK620904,MK814762,MK894432,MK937602,MN096367,MN096378,MN284901,MN310543,MT553340,MT657343,MT657344,MZ005670,OK318961,ON526972,ON970571,OP068339  
VC\_1164\_0 KU160641,KU160646,MP038790,MP038791,MP140401,MP140423,MP140432,MH399789,MH450115,MH450125,MH479926,MH825711,MN234168,MN234194,MN234221,MN284902,MN703412,MW055912,MZ209303,MZ274309,OK310503,ON456335,ON456340,ON456341,ON456342,ON456343,ON456344,ON456345,ON456346,ON456347,ON456348,ON456349,ON456350,ON456351,ON456352,ON456353,ON456354,ON456355,ON456356,ON456357,ON456358,ON456359,ON456360,ON456361,ON456362,ON456363,ON456364,ON456365,ON456366,ON456367,ON456368,ON456369,ON456370,ON456371,ON456372,ON456373,ON456374,ON456375,ON456376,ON456377,ON456378,ON456379,ON456380,ON456381,ON456382,ON456383,ON456384,ON456385,ON456386,ON456387,ON456388,ON456389,ON456390,ON456391,ON456392,ON456393,ON456394,ON456395,ON456396,ON456397,ON456398,ON456399,ON456400,ON456401,ON456402,ON456403,ON456404,ON456405,ON456406,ON456407,ON456408,ON456409,ON456410,ON456411,ON456412,ON456413,ON456414,ON456415,ON456416,ON456417,ON456418,ON456419,ON456420,ON456421,ON456422,ON456423,ON456424,ON456425,ON456426,ON456427,ON456428,ON456429,ON456430,ON456431,ON456432,ON456433,ON456434,ON456435,ON456436,ON456437,ON456438,ON456439,ON456440,ON456441,ON456442,ON456443,ON456444,ON456445,ON456446,ON456447,ON456448,ON456449,ON456450,ON456451,ON456452,ON456453,ON456454,ON456455,ON456456,ON456457,ON456458,ON456459,ON456460,ON456461,ON456462,ON456463,ON456464,ON456465,ON456466,ON456467,ON456468,ON456469,ON456470,ON456471,ON456472,ON456473,ON456474,ON456475,ON456476,ON456477,ON456478,ON456479,ON456480,ON456481,ON456482,ON456483,ON456484,ON456485,ON456486,ON456487,ON456488,ON456489,ON456490,ON456491,ON456492,ON456493,ON456494,ON456495,ON456496,ON456497,ON456498,ON456499,ON456500,ON456501,ON456502,ON456503,ON456504,ON456505,ON456506,ON456507,ON456508,ON456509,ON456510,ON456511,ON456512,ON456513,ON456514,ON456515,ON456516,ON456517,ON456518,ON456519,ON456520,ON456521,ON456522,ON456523,ON456524,ON456525,ON456526,ON456527,ON456528,ON456529,ON456530,ON456531,ON456532,ON456533,ON456534,ON456535,ON456536,ON456537,ON456538,ON456539,ON456540,ON456541,ON456542,ON456543,ON456544,ON456545,ON456546,ON456547,ON456548,ON456549,ON456550,ON456551,ON456552,ON456553,ON456554,ON456555,ON456556,ON456557,ON456558,ON456559,ON456560,ON456561,ON456562,ON456563,ON456564,ON456565,ON456566,ON456567,ON456568,ON456569,ON456570,ON456571,ON456572,ON456573,ON456574,ON456575,ON456576,ON456577,ON456578,ON456579,ON456580,ON456581,ON456582,ON456583,ON456584,ON456585,ON456586,ON456587,ON456588,ON456589,ON456590,ON456591,ON456592,ON456593,ON456594,ON456595,ON456596,ON456597,ON456598,ON456599,ON456600,ON456601,ON456602,ON456603,ON456604,ON456605,ON456606,ON456607,ON456608,ON456609,ON456610,ON456611,ON456612,ON456613,ON456614,ON456615,ON456616,ON456617,ON456618,ON456619,ON456620,ON456621,ON456622,ON456623,ON456624,ON456625,ON456626,ON456627,ON456628,ON456629,ON456630,ON456631,ON456632,ON456633,ON456634,ON456635,ON456636,ON456637,ON456638,ON456639,ON456640,ON456641,ON456642,ON456643,ON456644,ON456645,ON456646,ON456647,ON456648,ON456649,ON456650,ON456651,ON456652,ON456653,ON456654,ON456655,ON456656,ON456657,ON456658,ON456659,ON456660,ON456661,ON456662,ON456663,ON456664,ON456665,ON456666,ON456667,ON456668,ON456669,ON456670,ON456671,ON456672,ON456673,ON456674,ON456675,ON456676,ON456677,ON456678,ON456679,ON456680,ON456681,ON456682,ON456683,ON456684,ON456685,ON456686,ON456687,ON456688,ON456689,ON456690,ON456691,ON456692,ON456693,ON456694,ON456695,ON456696,ON456697,ON456698,ON456699,ON456700,ON456701,ON456702,ON456703,ON456704,ON456705,ON456706,ON456707,ON456708,ON456709,ON456710,ON456711,ON456712,ON456713,ON456714,ON456715,ON456716,ON456717,ON456718,ON456719,ON456720,ON456721,ON456722,ON456723,ON456724,ON456725,ON456726,ON456727,ON456728,ON456729,ON456730,ON456731,ON456732,ON456733,ON456734,ON456735,ON456736,ON456737,ON456738,ON456739,ON456740,ON456741,ON456742,ON456743,ON456744,ON456745,ON456746,ON456747,ON456748,ON456749,ON456750,ON456751,ON456752,ON456753,ON456754,ON456755,ON456756,ON456757,ON456758,ON456759,ON456760,ON456761,ON456762,ON456763,ON456764,ON456765,ON456766,ON456767,ON456768,ON456769,ON456770,ON456771,ON456772,ON456773,ON456774,ON456775,ON456776,ON456777,ON456778,ON456779,ON456780,ON456781,ON456782,ON456783,ON456784,ON456785,ON456786,ON456787,ON456788,ON456789,ON456790,ON456791,ON456792,ON456793,ON456794,ON456795,ON456796,ON456797,ON456798,ON456799,ON456800,ON456801,ON456802,ON456803,ON456804,ON456805,ON456806,ON456807,ON456808,ON456809,ON456810,ON456811,ON456812,ON456813,ON456814,ON456815,ON456816,ON456817,ON456818,ON456819,ON456820,ON456821,ON456822,ON456823,ON456824,ON456825,ON456826,ON456827,ON456828,ON456829,ON456830,ON456831,ON456832,ON456833,ON456834,ON456835,ON456836,ON456837,ON456838,ON456839,ON456840,ON456841,ON456842,ON456843,ON456844,ON456845,ON456846,ON456847,ON456848,ON456849,ON456850,ON456851,ON456852,ON456853,ON456854,ON456855,ON456856,ON456857,ON456858,ON456859,ON456860,ON456861,ON456862,ON456863,ON456864,ON456865,ON456866,ON456867,ON456868,ON456869,ON456870,ON456871,ON456872,ON456873,ON456874,ON456875,ON456876,ON456877,ON456878,ON456879,ON456880,ON456881,ON456882,ON456883,ON456884,ON456885,ON456886,ON456887,ON456888,ON456889,ON456890,ON456891,ON456892,ON456893,ON456894,ON456895,ON456896,ON456897,ON456898,ON456899,ON456900,ON456901,ON456902,ON456903,ON456904,ON456905,ON456906,ON456907,ON456908,ON456909,ON456910,ON456911,ON456912,ON456913,ON456914,ON456915,ON456916,ON456917,ON456918,ON456919,ON456920,ON456921,ON456922,ON456923,ON456924,ON456925,ON456926,ON456927,ON456928,ON456929,ON456930,ON456931,ON456932,ON456933,ON456934,ON456935,ON456936,ON456937,ON456938,ON456939,ON456940,ON456941,ON456942,ON456943,ON456944,ON456945,ON456946,ON456947,ON456948,ON456949,ON456950,ON456951,ON456952,ON456953,ON456954,ON456955,ON456956,ON456957,ON456958,ON456959,ON456960,ON456961,ON456962,ON456963,ON456964,ON456965,ON456966,ON456967,ON456968,ON456969,ON456970,ON456971,ON456972,ON456973,ON456974,ON456975,ON456976,ON456977,ON456978,ON456979,ON456980,ON456981,ON456982,ON456983,ON456984,ON456985,ON456986,ON456987,ON456988,ON456989,ON456990,ON456991,ON456992,ON456993,ON456994,ON456995,ON456996,ON456997,ON456998,ON456999,ON457000,ON457001,ON457002,ON457003,ON457004,ON457005,ON457006,ON457007,ON457008,ON457009,ON457010,ON457011,ON457012,ON457013,ON457014,ON457015,ON457016,ON457017,ON457018,ON457019,ON457020,ON457021,ON457022,ON457023,ON457024,ON457025,ON457026,ON457027,ON457028,ON457029,ON457030,ON457031,ON457032,ON457033,ON457034,ON457035,ON457036,ON457037,ON457038,ON457039,ON457040,ON457041,ON457042,ON457043,ON457044,ON457045,ON457046,ON457047,ON457048,ON457049,ON457050,ON457051,ON457052,ON457053,ON457054,ON457055,ON457056,ON457057,ON457058,ON457059,ON457060,ON457061,ON457062,ON457063,ON457064,ON457065,ON457066,ON457067,ON457068,ON457069,ON457070,ON457071,ON457072,ON457073,ON457074,ON457075,ON457076,ON457077,ON457078,ON457079,ON457080,ON457081,ON457082,ON457083,ON457084,ON457085,ON457086,ON457087,ON457088,ON457089,ON457090,ON457091,ON457092,ON457093,ON457094,ON457095,ON457096,ON457097,ON457098,ON457099,ON457100,ON457101,ON457102,ON457103,ON457104,ON457105,ON457106,ON457107,ON457108,ON457109,ON457110,ON457111,ON457112,ON457113,ON457114,ON457115,ON457116,ON457117,ON457118,ON457119,ON457120,ON457121,ON457122,ON457123,ON457124,ON457125,ON457126,ON457127,ON457128,ON457129,ON457130,ON457131,ON457132,ON457133,ON457134,ON457135,ON457136,ON457137,ON457138,ON457139,ON457140,ON457141,ON457142,ON457143,ON457144,ON457145,ON457146,ON457147,ON457148,ON457149,ON457150,ON457151,ON457152,ON457153,ON457154,ON457155,ON457156,ON457157,ON457158,ON457159,ON457160,ON457161,ON457162,ON457163,ON457164,ON457165,ON457166,ON457167,ON457168,ON457169,ON457170,ON457171,ON457172,ON457173,ON457174,ON457175,ON457176,ON457177,ON457178,ON457179,ON457180,ON457181,ON457182,ON457183,ON457184,ON457185,ON457186,ON457187,ON457188,ON457189,ON457190,ON457191,ON457192,ON457193,ON457194,ON457195,ON457196,ON457197,ON457198,ON457199,ON457200,ON457201,ON457202,ON457203,ON457204,ON457205,ON457206,ON457207,ON457208,ON457209,ON457210,ON457211,ON457212,ON457213,ON457214,ON457215,ON457216,ON457217,ON457218,ON457219,ON457220,ON457221,ON457222,ON457223,ON457224,ON457225,ON457226,ON457227,ON457228,ON457229,ON457230,ON457231,ON457232,ON457233,ON457234,ON457235,ON457236,ON457237,ON457238,ON457239,ON457240,ON457241,ON457242,ON457243,ON457244,ON457245,ON457246,ON457247,ON457248,ON457249,ON457250,ON457251,ON457252,ON457253,ON457254,ON457255,ON457256,ON457257,ON457258,ON457259,ON457260,ON457261,ON457262,ON457263,ON457264,ON457265,ON457266,ON457267,ON457268,ON457269,ON457270,ON457271,ON457272,ON457273,ON457274,ON457275,ON457276,ON457277,ON457278,ON457279,ON457280,ON457281,ON457282,ON457283,ON457284,ON457285,ON457286,ON457287,ON457288,ON457289,ON457290,ON457291,ON457292,ON457293,ON457294,ON457295,ON457296,ON457297,ON457298,ON457299,ON457300,ON457301,ON457302,ON457303,ON457304,ON457305,ON457306,ON457307,ON457308,ON457309,ON457310,ON457311,ON457312,ON457313,ON457314,ON457315,ON457316,ON457317,ON457318,ON457319,ON457320,ON457321,ON457322,ON457323,ON457324,ON457325,ON457326,ON457327,ON457328,ON457329,ON457330,ON457331,ON457332,ON457333,ON457334,ON457335,ON457336,ON457337,ON457338,ON457339,ON457340,ON457341,ON457342,ON457343,ON457344,ON457345,ON457346,ON457347,ON457348,ON457349,ON457350,ON457351,ON457352,ON457353,ON457354,ON457355,ON457356,ON457357,ON457358,ON457359,ON457360,ON457361,ON457362,ON457363,ON457364,ON457365,ON457366,ON457367,ON457368,ON457369,ON457370,ON457371,ON457372,ON457373,ON457374,ON457375,ON457376,ON457377,ON457378,ON457379,ON457380,ON457381,ON457382,ON457383,ON457384,ON457385,ON457386,ON457387,ON457388,ON457389,ON457390,ON457391,ON457392,ON457393,ON457394,ON457395,ON457396,ON457397,ON457398,ON457399,ON457400,ON457401,ON457402,ON457403,ON457404,ON457405,ON457406,ON457407,ON457408,ON457409,ON457410,ON457411,ON457412,ON457413,ON457414,ON457415,ON457416,ON457417,ON457418,ON457419,ON457420,ON457421,ON457422,ON457423,ON457424,ON457425,ON457426,ON457427,ON457428,ON457429,ON457430,ON457431,ON457432,ON457433,ON457434,ON457435,ON457436,ON457437,ON457438,ON457439,ON457440,ON457441,ON457442,ON457443,ON457444,ON457445,ON457446,ON457447,ON457448,ON457449,ON457450,ON457451,ON457452,ON457453,ON457454,ON457455,ON457456,ON



|           |                                                                                                                                                                                                                                                                                                                                                                                                                                                                                                                                                                                                                                                                                                                                                                                                                                                                                                                                                                                                                                                                                                                                                                                                                                                                                                                                                                                                                                                                                                                                                                                                                                                                                                                                                                                                                                                                                                                                                                                                                                                                                                                                                                                                                                                                                                                                                                                                                                                                                                                                                                                                                                                                                                                                                                                                                                                                                                                                                                                                                                                                                                                                                                                                                                                                                                                                                                                                                                                                                                                                                                                                                                                                                                                                                                                                                                                                                                                                                                                                                                                                                                                                                                                                                                                                                                                                                                                                                                                                                                                                                                                                                                                                                                                                                                                                                                                                                                                                                                                                                                                                                                                                                                                                                                                                                                                                                                                                                                                                                                                                                                                                                                                                                                                                                                                                                                                                                                                                                                                                                                                                                                                                                                                                                                                                                                                                                                                                                                                                                                                                                                                                                                                                                                                                                                                                                                                                                                                                                                                                                                                                                                                                                                                                                                                                                                                                                                                                                                                                                                                                                                                                                                                                                                                                                                                                                                                                                                                                                                                                                                                                                                                                                                                                                                                                                                                                                                                                                                                                                                                                                                                                                                                                                                                                                                                                                                                                                                                                                                                                                                                                                                                                                                                                                                                                                                                                                                                                                                                                                                                                                                                                                                                                                                                                                                                                                                                                                                                                        |
|-----------|----------------------------------------------------------------------------------------------------------------------------------------------------------------------------------------------------------------------------------------------------------------------------------------------------------------------------------------------------------------------------------------------------------------------------------------------------------------------------------------------------------------------------------------------------------------------------------------------------------------------------------------------------------------------------------------------------------------------------------------------------------------------------------------------------------------------------------------------------------------------------------------------------------------------------------------------------------------------------------------------------------------------------------------------------------------------------------------------------------------------------------------------------------------------------------------------------------------------------------------------------------------------------------------------------------------------------------------------------------------------------------------------------------------------------------------------------------------------------------------------------------------------------------------------------------------------------------------------------------------------------------------------------------------------------------------------------------------------------------------------------------------------------------------------------------------------------------------------------------------------------------------------------------------------------------------------------------------------------------------------------------------------------------------------------------------------------------------------------------------------------------------------------------------------------------------------------------------------------------------------------------------------------------------------------------------------------------------------------------------------------------------------------------------------------------------------------------------------------------------------------------------------------------------------------------------------------------------------------------------------------------------------------------------------------------------------------------------------------------------------------------------------------------------------------------------------------------------------------------------------------------------------------------------------------------------------------------------------------------------------------------------------------------------------------------------------------------------------------------------------------------------------------------------------------------------------------------------------------------------------------------------------------------------------------------------------------------------------------------------------------------------------------------------------------------------------------------------------------------------------------------------------------------------------------------------------------------------------------------------------------------------------------------------------------------------------------------------------------------------------------------------------------------------------------------------------------------------------------------------------------------------------------------------------------------------------------------------------------------------------------------------------------------------------------------------------------------------------------------------------------------------------------------------------------------------------------------------------------------------------------------------------------------------------------------------------------------------------------------------------------------------------------------------------------------------------------------------------------------------------------------------------------------------------------------------------------------------------------------------------------------------------------------------------------------------------------------------------------------------------------------------------------------------------------------------------------------------------------------------------------------------------------------------------------------------------------------------------------------------------------------------------------------------------------------------------------------------------------------------------------------------------------------------------------------------------------------------------------------------------------------------------------------------------------------------------------------------------------------------------------------------------------------------------------------------------------------------------------------------------------------------------------------------------------------------------------------------------------------------------------------------------------------------------------------------------------------------------------------------------------------------------------------------------------------------------------------------------------------------------------------------------------------------------------------------------------------------------------------------------------------------------------------------------------------------------------------------------------------------------------------------------------------------------------------------------------------------------------------------------------------------------------------------------------------------------------------------------------------------------------------------------------------------------------------------------------------------------------------------------------------------------------------------------------------------------------------------------------------------------------------------------------------------------------------------------------------------------------------------------------------------------------------------------------------------------------------------------------------------------------------------------------------------------------------------------------------------------------------------------------------------------------------------------------------------------------------------------------------------------------------------------------------------------------------------------------------------------------------------------------------------------------------------------------------------------------------------------------------------------------------------------------------------------------------------------------------------------------------------------------------------------------------------------------------------------------------------------------------------------------------------------------------------------------------------------------------------------------------------------------------------------------------------------------------------------------------------------------------------------------------------------------------------------------------------------------------------------------------------------------------------------------------------------------------------------------------------------------------------------------------------------------------------------------------------------------------------------------------------------------------------------------------------------------------------------------------------------------------------------------------------------------------------------------------------------------------------------------------------------------------------------------------------------------------------------------------------------------------------------------------------------------------------------------------------------------------------------------------------------------------------------------------------------------------------------------------------------------------------------------------------------------------------------------------------------------------------------------------------------------------------------------------------------------------------------------------------------------------------------------------------------------------------------------------------------------------------------------------------------------------------------------------------------------------------------------------------------------------------------------------------------------------------------------------------------------------------------------------------------------------------------------------------------------------------------------------------------------------------------------------------------------------------------------------------------------------------------------------------------------------------------------------------------------------------------------------------------------------------------------------------------------------------------------------------|
| VC_1191_0 | KX513871,MC945160,MC945185                                                                                                                                                                                                                                                                                                                                                                                                                                                                                                                                                                                                                                                                                                                                                                                                                                                                                                                                                                                                                                                                                                                                                                                                                                                                                                                                                                                                                                                                                                                                                                                                                                                                                                                                                                                                                                                                                                                                                                                                                                                                                                                                                                                                                                                                                                                                                                                                                                                                                                                                                                                                                                                                                                                                                                                                                                                                                                                                                                                                                                                                                                                                                                                                                                                                                                                                                                                                                                                                                                                                                                                                                                                                                                                                                                                                                                                                                                                                                                                                                                                                                                                                                                                                                                                                                                                                                                                                                                                                                                                                                                                                                                                                                                                                                                                                                                                                                                                                                                                                                                                                                                                                                                                                                                                                                                                                                                                                                                                                                                                                                                                                                                                                                                                                                                                                                                                                                                                                                                                                                                                                                                                                                                                                                                                                                                                                                                                                                                                                                                                                                                                                                                                                                                                                                                                                                                                                                                                                                                                                                                                                                                                                                                                                                                                                                                                                                                                                                                                                                                                                                                                                                                                                                                                                                                                                                                                                                                                                                                                                                                                                                                                                                                                                                                                                                                                                                                                                                                                                                                                                                                                                                                                                                                                                                                                                                                                                                                                                                                                                                                                                                                                                                                                                                                                                                                                                                                                                                                                                                                                                                                                                                                                                                                                                                                                                                                                                                                             |
| VC_1192_0 | MT135371,MT135422,MT135432                                                                                                                                                                                                                                                                                                                                                                                                                                                                                                                                                                                                                                                                                                                                                                                                                                                                                                                                                                                                                                                                                                                                                                                                                                                                                                                                                                                                                                                                                                                                                                                                                                                                                                                                                                                                                                                                                                                                                                                                                                                                                                                                                                                                                                                                                                                                                                                                                                                                                                                                                                                                                                                                                                                                                                                                                                                                                                                                                                                                                                                                                                                                                                                                                                                                                                                                                                                                                                                                                                                                                                                                                                                                                                                                                                                                                                                                                                                                                                                                                                                                                                                                                                                                                                                                                                                                                                                                                                                                                                                                                                                                                                                                                                                                                                                                                                                                                                                                                                                                                                                                                                                                                                                                                                                                                                                                                                                                                                                                                                                                                                                                                                                                                                                                                                                                                                                                                                                                                                                                                                                                                                                                                                                                                                                                                                                                                                                                                                                                                                                                                                                                                                                                                                                                                                                                                                                                                                                                                                                                                                                                                                                                                                                                                                                                                                                                                                                                                                                                                                                                                                                                                                                                                                                                                                                                                                                                                                                                                                                                                                                                                                                                                                                                                                                                                                                                                                                                                                                                                                                                                                                                                                                                                                                                                                                                                                                                                                                                                                                                                                                                                                                                                                                                                                                                                                                                                                                                                                                                                                                                                                                                                                                                                                                                                                                                                                                                                                             |
| VC_1193_0 | MG945352,MC945735,MC945752                                                                                                                                                                                                                                                                                                                                                                                                                                                                                                                                                                                                                                                                                                                                                                                                                                                                                                                                                                                                                                                                                                                                                                                                                                                                                                                                                                                                                                                                                                                                                                                                                                                                                                                                                                                                                                                                                                                                                                                                                                                                                                                                                                                                                                                                                                                                                                                                                                                                                                                                                                                                                                                                                                                                                                                                                                                                                                                                                                                                                                                                                                                                                                                                                                                                                                                                                                                                                                                                                                                                                                                                                                                                                                                                                                                                                                                                                                                                                                                                                                                                                                                                                                                                                                                                                                                                                                                                                                                                                                                                                                                                                                                                                                                                                                                                                                                                                                                                                                                                                                                                                                                                                                                                                                                                                                                                                                                                                                                                                                                                                                                                                                                                                                                                                                                                                                                                                                                                                                                                                                                                                                                                                                                                                                                                                                                                                                                                                                                                                                                                                                                                                                                                                                                                                                                                                                                                                                                                                                                                                                                                                                                                                                                                                                                                                                                                                                                                                                                                                                                                                                                                                                                                                                                                                                                                                                                                                                                                                                                                                                                                                                                                                                                                                                                                                                                                                                                                                                                                                                                                                                                                                                                                                                                                                                                                                                                                                                                                                                                                                                                                                                                                                                                                                                                                                                                                                                                                                                                                                                                                                                                                                                                                                                                                                                                                                                                                                                             |
| VC_1194_0 | MG945210,MC945327,MC945623,MT135440,MT135446                                                                                                                                                                                                                                                                                                                                                                                                                                                                                                                                                                                                                                                                                                                                                                                                                                                                                                                                                                                                                                                                                                                                                                                                                                                                                                                                                                                                                                                                                                                                                                                                                                                                                                                                                                                                                                                                                                                                                                                                                                                                                                                                                                                                                                                                                                                                                                                                                                                                                                                                                                                                                                                                                                                                                                                                                                                                                                                                                                                                                                                                                                                                                                                                                                                                                                                                                                                                                                                                                                                                                                                                                                                                                                                                                                                                                                                                                                                                                                                                                                                                                                                                                                                                                                                                                                                                                                                                                                                                                                                                                                                                                                                                                                                                                                                                                                                                                                                                                                                                                                                                                                                                                                                                                                                                                                                                                                                                                                                                                                                                                                                                                                                                                                                                                                                                                                                                                                                                                                                                                                                                                                                                                                                                                                                                                                                                                                                                                                                                                                                                                                                                                                                                                                                                                                                                                                                                                                                                                                                                                                                                                                                                                                                                                                                                                                                                                                                                                                                                                                                                                                                                                                                                                                                                                                                                                                                                                                                                                                                                                                                                                                                                                                                                                                                                                                                                                                                                                                                                                                                                                                                                                                                                                                                                                                                                                                                                                                                                                                                                                                                                                                                                                                                                                                                                                                                                                                                                                                                                                                                                                                                                                                                                                                                                                                                                                                                                                           |
| VC_1196_0 | MC945748,MC945799,MC945800                                                                                                                                                                                                                                                                                                                                                                                                                                                                                                                                                                                                                                                                                                                                                                                                                                                                                                                                                                                                                                                                                                                                                                                                                                                                                                                                                                                                                                                                                                                                                                                                                                                                                                                                                                                                                                                                                                                                                                                                                                                                                                                                                                                                                                                                                                                                                                                                                                                                                                                                                                                                                                                                                                                                                                                                                                                                                                                                                                                                                                                                                                                                                                                                                                                                                                                                                                                                                                                                                                                                                                                                                                                                                                                                                                                                                                                                                                                                                                                                                                                                                                                                                                                                                                                                                                                                                                                                                                                                                                                                                                                                                                                                                                                                                                                                                                                                                                                                                                                                                                                                                                                                                                                                                                                                                                                                                                                                                                                                                                                                                                                                                                                                                                                                                                                                                                                                                                                                                                                                                                                                                                                                                                                                                                                                                                                                                                                                                                                                                                                                                                                                                                                                                                                                                                                                                                                                                                                                                                                                                                                                                                                                                                                                                                                                                                                                                                                                                                                                                                                                                                                                                                                                                                                                                                                                                                                                                                                                                                                                                                                                                                                                                                                                                                                                                                                                                                                                                                                                                                                                                                                                                                                                                                                                                                                                                                                                                                                                                                                                                                                                                                                                                                                                                                                                                                                                                                                                                                                                                                                                                                                                                                                                                                                                                                                                                                                                                                             |
| VC_1197_0 | KX513875,MG883712,MC945284,MC945309,MC945433,MC945502,MC945616,MC945794,MK496693,MK496774,MZ089789,OM869564,OM869565,OM869570,OM869709                                                                                                                                                                                                                                                                                                                                                                                                                                                                                                                                                                                                                                                                                                                                                                                                                                                                                                                                                                                                                                                                                                                                                                                                                                                                                                                                                                                                                                                                                                                                                                                                                                                                                                                                                                                                                                                                                                                                                                                                                                                                                                                                                                                                                                                                                                                                                                                                                                                                                                                                                                                                                                                                                                                                                                                                                                                                                                                                                                                                                                                                                                                                                                                                                                                                                                                                                                                                                                                                                                                                                                                                                                                                                                                                                                                                                                                                                                                                                                                                                                                                                                                                                                                                                                                                                                                                                                                                                                                                                                                                                                                                                                                                                                                                                                                                                                                                                                                                                                                                                                                                                                                                                                                                                                                                                                                                                                                                                                                                                                                                                                                                                                                                                                                                                                                                                                                                                                                                                                                                                                                                                                                                                                                                                                                                                                                                                                                                                                                                                                                                                                                                                                                                                                                                                                                                                                                                                                                                                                                                                                                                                                                                                                                                                                                                                                                                                                                                                                                                                                                                                                                                                                                                                                                                                                                                                                                                                                                                                                                                                                                                                                                                                                                                                                                                                                                                                                                                                                                                                                                                                                                                                                                                                                                                                                                                                                                                                                                                                                                                                                                                                                                                                                                                                                                                                                                                                                                                                                                                                                                                                                                                                                                                                                                                                                                                 |
| VC_1199_0 | MH727560,MH926061,MK937613,MK977706,MK977710,MK977712,MK977714,MK977715                                                                                                                                                                                                                                                                                                                                                                                                                                                                                                                                                                                                                                                                                                                                                                                                                                                                                                                                                                                                                                                                                                                                                                                                                                                                                                                                                                                                                                                                                                                                                                                                                                                                                                                                                                                                                                                                                                                                                                                                                                                                                                                                                                                                                                                                                                                                                                                                                                                                                                                                                                                                                                                                                                                                                                                                                                                                                                                                                                                                                                                                                                                                                                                                                                                                                                                                                                                                                                                                                                                                                                                                                                                                                                                                                                                                                                                                                                                                                                                                                                                                                                                                                                                                                                                                                                                                                                                                                                                                                                                                                                                                                                                                                                                                                                                                                                                                                                                                                                                                                                                                                                                                                                                                                                                                                                                                                                                                                                                                                                                                                                                                                                                                                                                                                                                                                                                                                                                                                                                                                                                                                                                                                                                                                                                                                                                                                                                                                                                                                                                                                                                                                                                                                                                                                                                                                                                                                                                                                                                                                                                                                                                                                                                                                                                                                                                                                                                                                                                                                                                                                                                                                                                                                                                                                                                                                                                                                                                                                                                                                                                                                                                                                                                                                                                                                                                                                                                                                                                                                                                                                                                                                                                                                                                                                                                                                                                                                                                                                                                                                                                                                                                                                                                                                                                                                                                                                                                                                                                                                                                                                                                                                                                                                                                                                                                                                                                                |
| VC_12_0   | AP008954,A,Y954960,A,Y954961,CP062422,CP062462,CP071049,DQ530362,JQ973847,KJ140076,KJ425911,KP209285,KP893289,KT344895,MK290764,MK618716,MW238767,OM439663,OM439669,OM439672,OM439673,OM439674                                                                                                                                                                                                                                                                                                                                                                                                                                                                                                                                                                                                                                                                                                                                                                                                                                                                                                                                                                                                                                                                                                                                                                                                                                                                                                                                                                                                                                                                                                                                                                                                                                                                                                                                                                                                                                                                                                                                                                                                                                                                                                                                                                                                                                                                                                                                                                                                                                                                                                                                                                                                                                                                                                                                                                                                                                                                                                                                                                                                                                                                                                                                                                                                                                                                                                                                                                                                                                                                                                                                                                                                                                                                                                                                                                                                                                                                                                                                                                                                                                                                                                                                                                                                                                                                                                                                                                                                                                                                                                                                                                                                                                                                                                                                                                                                                                                                                                                                                                                                                                                                                                                                                                                                                                                                                                                                                                                                                                                                                                                                                                                                                                                                                                                                                                                                                                                                                                                                                                                                                                                                                                                                                                                                                                                                                                                                                                                                                                                                                                                                                                                                                                                                                                                                                                                                                                                                                                                                                                                                                                                                                                                                                                                                                                                                                                                                                                                                                                                                                                                                                                                                                                                                                                                                                                                                                                                                                                                                                                                                                                                                                                                                                                                                                                                                                                                                                                                                                                                                                                                                                                                                                                                                                                                                                                                                                                                                                                                                                                                                                                                                                                                                                                                                                                                                                                                                                                                                                                                                                                                                                                                                                                                                                                                                         |
| VC_12_1   | MG543995,MSG564297                                                                                                                                                                                                                                                                                                                                                                                                                                                                                                                                                                                                                                                                                                                                                                                                                                                                                                                                                                                                                                                                                                                                                                                                                                                                                                                                                                                                                                                                                                                                                                                                                                                                                                                                                                                                                                                                                                                                                                                                                                                                                                                                                                                                                                                                                                                                                                                                                                                                                                                                                                                                                                                                                                                                                                                                                                                                                                                                                                                                                                                                                                                                                                                                                                                                                                                                                                                                                                                                                                                                                                                                                                                                                                                                                                                                                                                                                                                                                                                                                                                                                                                                                                                                                                                                                                                                                                                                                                                                                                                                                                                                                                                                                                                                                                                                                                                                                                                                                                                                                                                                                                                                                                                                                                                                                                                                                                                                                                                                                                                                                                                                                                                                                                                                                                                                                                                                                                                                                                                                                                                                                                                                                                                                                                                                                                                                                                                                                                                                                                                                                                                                                                                                                                                                                                                                                                                                                                                                                                                                                                                                                                                                                                                                                                                                                                                                                                                                                                                                                                                                                                                                                                                                                                                                                                                                                                                                                                                                                                                                                                                                                                                                                                                                                                                                                                                                                                                                                                                                                                                                                                                                                                                                                                                                                                                                                                                                                                                                                                                                                                                                                                                                                                                                                                                                                                                                                                                                                                                                                                                                                                                                                                                                                                                                                                                                                                                                                                                     |
| VC_12_2   | AB370268,AP001553,A,Y954962,A,Y954963,A,Y954964,A,Y954965,A,Y954966,A,Y954967,A,Y954968,DQ908929,JX013863,JX094501,KC595279,KP893290,KR709302,KR709303,MK211557,MN9904510,ON571632                                                                                                                                                                                                                                                                                                                                                                                                                                                                                                                                                                                                                                                                                                                                                                                                                                                                                                                                                                                                                                                                                                                                                                                                                                                                                                                                                                                                                                                                                                                                                                                                                                                                                                                                                                                                                                                                                                                                                                                                                                                                                                                                                                                                                                                                                                                                                                                                                                                                                                                                                                                                                                                                                                                                                                                                                                                                                                                                                                                                                                                                                                                                                                                                                                                                                                                                                                                                                                                                                                                                                                                                                                                                                                                                                                                                                                                                                                                                                                                                                                                                                                                                                                                                                                                                                                                                                                                                                                                                                                                                                                                                                                                                                                                                                                                                                                                                                                                                                                                                                                                                                                                                                                                                                                                                                                                                                                                                                                                                                                                                                                                                                                                                                                                                                                                                                                                                                                                                                                                                                                                                                                                                                                                                                                                                                                                                                                                                                                                                                                                                                                                                                                                                                                                                                                                                                                                                                                                                                                                                                                                                                                                                                                                                                                                                                                                                                                                                                                                                                                                                                                                                                                                                                                                                                                                                                                                                                                                                                                                                                                                                                                                                                                                                                                                                                                                                                                                                                                                                                                                                                                                                                                                                                                                                                                                                                                                                                                                                                                                                                                                                                                                                                                                                                                                                                                                                                                                                                                                                                                                                                                                                                                                                                                                                                     |
| VC_1200_0 | MF197383,MH271317,MN234233,OP172878                                                                                                                                                                                                                                                                                                                                                                                                                                                                                                                                                                                                                                                                                                                                                                                                                                                                                                                                                                                                                                                                                                                                                                                                                                                                                                                                                                                                                                                                                                                                                                                                                                                                                                                                                                                                                                                                                                                                                                                                                                                                                                                                                                                                                                                                                                                                                                                                                                                                                                                                                                                                                                                                                                                                                                                                                                                                                                                                                                                                                                                                                                                                                                                                                                                                                                                                                                                                                                                                                                                                                                                                                                                                                                                                                                                                                                                                                                                                                                                                                                                                                                                                                                                                                                                                                                                                                                                                                                                                                                                                                                                                                                                                                                                                                                                                                                                                                                                                                                                                                                                                                                                                                                                                                                                                                                                                                                                                                                                                                                                                                                                                                                                                                                                                                                                                                                                                                                                                                                                                                                                                                                                                                                                                                                                                                                                                                                                                                                                                                                                                                                                                                                                                                                                                                                                                                                                                                                                                                                                                                                                                                                                                                                                                                                                                                                                                                                                                                                                                                                                                                                                                                                                                                                                                                                                                                                                                                                                                                                                                                                                                                                                                                                                                                                                                                                                                                                                                                                                                                                                                                                                                                                                                                                                                                                                                                                                                                                                                                                                                                                                                                                                                                                                                                                                                                                                                                                                                                                                                                                                                                                                                                                                                                                                                                                                                                                                                                                    |
| VC_1201_0 | KY817360,OL656105                                                                                                                                                                                                                                                                                                                                                                                                                                                                                                                                                                                                                                                                                                                                                                                                                                                                                                                                                                                                                                                                                                                                                                                                                                                                                                                                                                                                                                                                                                                                                                                                                                                                                                                                                                                                                                                                                                                                                                                                                                                                                                                                                                                                                                                                                                                                                                                                                                                                                                                                                                                                                                                                                                                                                                                                                                                                                                                                                                                                                                                                                                                                                                                                                                                                                                                                                                                                                                                                                                                                                                                                                                                                                                                                                                                                                                                                                                                                                                                                                                                                                                                                                                                                                                                                                                                                                                                                                                                                                                                                                                                                                                                                                                                                                                                                                                                                                                                                                                                                                                                                                                                                                                                                                                                                                                                                                                                                                                                                                                                                                                                                                                                                                                                                                                                                                                                                                                                                                                                                                                                                                                                                                                                                                                                                                                                                                                                                                                                                                                                                                                                                                                                                                                                                                                                                                                                                                                                                                                                                                                                                                                                                                                                                                                                                                                                                                                                                                                                                                                                                                                                                                                                                                                                                                                                                                                                                                                                                                                                                                                                                                                                                                                                                                                                                                                                                                                                                                                                                                                                                                                                                                                                                                                                                                                                                                                                                                                                                                                                                                                                                                                                                                                                                                                                                                                                                                                                                                                                                                                                                                                                                                                                                                                                                                                                                                                                                                                                      |
| VC_1202_0 | LC035386,LC210520                                                                                                                                                                                                                                                                                                                                                                                                                                                                                                                                                                                                                                                                                                                                                                                                                                                                                                                                                                                                                                                                                                                                                                                                                                                                                                                                                                                                                                                                                                                                                                                                                                                                                                                                                                                                                                                                                                                                                                                                                                                                                                                                                                                                                                                                                                                                                                                                                                                                                                                                                                                                                                                                                                                                                                                                                                                                                                                                                                                                                                                                                                                                                                                                                                                                                                                                                                                                                                                                                                                                                                                                                                                                                                                                                                                                                                                                                                                                                                                                                                                                                                                                                                                                                                                                                                                                                                                                                                                                                                                                                                                                                                                                                                                                                                                                                                                                                                                                                                                                                                                                                                                                                                                                                                                                                                                                                                                                                                                                                                                                                                                                                                                                                                                                                                                                                                                                                                                                                                                                                                                                                                                                                                                                                                                                                                                                                                                                                                                                                                                                                                                                                                                                                                                                                                                                                                                                                                                                                                                                                                                                                                                                                                                                                                                                                                                                                                                                                                                                                                                                                                                                                                                                                                                                                                                                                                                                                                                                                                                                                                                                                                                                                                                                                                                                                                                                                                                                                                                                                                                                                                                                                                                                                                                                                                                                                                                                                                                                                                                                                                                                                                                                                                                                                                                                                                                                                                                                                                                                                                                                                                                                                                                                                                                                                                                                                                                                                                                      |
| VC_1203_0 | MN988521,MN988522,MN988523,MN988524,MN988525,MN988559,MN988561                                                                                                                                                                                                                                                                                                                                                                                                                                                                                                                                                                                                                                                                                                                                                                                                                                                                                                                                                                                                                                                                                                                                                                                                                                                                                                                                                                                                                                                                                                                                                                                                                                                                                                                                                                                                                                                                                                                                                                                                                                                                                                                                                                                                                                                                                                                                                                                                                                                                                                                                                                                                                                                                                                                                                                                                                                                                                                                                                                                                                                                                                                                                                                                                                                                                                                                                                                                                                                                                                                                                                                                                                                                                                                                                                                                                                                                                                                                                                                                                                                                                                                                                                                                                                                                                                                                                                                                                                                                                                                                                                                                                                                                                                                                                                                                                                                                                                                                                                                                                                                                                                                                                                                                                                                                                                                                                                                                                                                                                                                                                                                                                                                                                                                                                                                                                                                                                                                                                                                                                                                                                                                                                                                                                                                                                                                                                                                                                                                                                                                                                                                                                                                                                                                                                                                                                                                                                                                                                                                                                                                                                                                                                                                                                                                                                                                                                                                                                                                                                                                                                                                                                                                                                                                                                                                                                                                                                                                                                                                                                                                                                                                                                                                                                                                                                                                                                                                                                                                                                                                                                                                                                                                                                                                                                                                                                                                                                                                                                                                                                                                                                                                                                                                                                                                                                                                                                                                                                                                                                                                                                                                                                                                                                                                                                                                                                                                                                         |
| VC_1203_1 | MN988560                                                                                                                                                                                                                                                                                                                                                                                                                                                                                                                                                                                                                                                                                                                                                                                                                                                                                                                                                                                                                                                                                                                                                                                                                                                                                                                                                                                                                                                                                                                                                                                                                                                                                                                                                                                                                                                                                                                                                                                                                                                                                                                                                                                                                                                                                                                                                                                                                                                                                                                                                                                                                                                                                                                                                                                                                                                                                                                                                                                                                                                                                                                                                                                                                                                                                                                                                                                                                                                                                                                                                                                                                                                                                                                                                                                                                                                                                                                                                                                                                                                                                                                                                                                                                                                                                                                                                                                                                                                                                                                                                                                                                                                                                                                                                                                                                                                                                                                                                                                                                                                                                                                                                                                                                                                                                                                                                                                                                                                                                                                                                                                                                                                                                                                                                                                                                                                                                                                                                                                                                                                                                                                                                                                                                                                                                                                                                                                                                                                                                                                                                                                                                                                                                                                                                                                                                                                                                                                                                                                                                                                                                                                                                                                                                                                                                                                                                                                                                                                                                                                                                                                                                                                                                                                                                                                                                                                                                                                                                                                                                                                                                                                                                                                                                                                                                                                                                                                                                                                                                                                                                                                                                                                                                                                                                                                                                                                                                                                                                                                                                                                                                                                                                                                                                                                                                                                                                                                                                                                                                                                                                                                                                                                                                                                                                                                                                                                                                                                               |
| VC_1204_0 | LC644975,LC644976                                                                                                                                                                                                                                                                                                                                                                                                                                                                                                                                                                                                                                                                                                                                                                                                                                                                                                                                                                                                                                                                                                                                                                                                                                                                                                                                                                                                                                                                                                                                                                                                                                                                                                                                                                                                                                                                                                                                                                                                                                                                                                                                                                                                                                                                                                                                                                                                                                                                                                                                                                                                                                                                                                                                                                                                                                                                                                                                                                                                                                                                                                                                                                                                                                                                                                                                                                                                                                                                                                                                                                                                                                                                                                                                                                                                                                                                                                                                                                                                                                                                                                                                                                                                                                                                                                                                                                                                                                                                                                                                                                                                                                                                                                                                                                                                                                                                                                                                                                                                                                                                                                                                                                                                                                                                                                                                                                                                                                                                                                                                                                                                                                                                                                                                                                                                                                                                                                                                                                                                                                                                                                                                                                                                                                                                                                                                                                                                                                                                                                                                                                                                                                                                                                                                                                                                                                                                                                                                                                                                                                                                                                                                                                                                                                                                                                                                                                                                                                                                                                                                                                                                                                                                                                                                                                                                                                                                                                                                                                                                                                                                                                                                                                                                                                                                                                                                                                                                                                                                                                                                                                                                                                                                                                                                                                                                                                                                                                                                                                                                                                                                                                                                                                                                                                                                                                                                                                                                                                                                                                                                                                                                                                                                                                                                                                                                                                                                                                                      |
| VC_1205_0 | MT740726,MT740743,MT740745                                                                                                                                                                                                                                                                                                                                                                                                                                                                                                                                                                                                                                                                                                                                                                                                                                                                                                                                                                                                                                                                                                                                                                                                                                                                                                                                                                                                                                                                                                                                                                                                                                                                                                                                                                                                                                                                                                                                                                                                                                                                                                                                                                                                                                                                                                                                                                                                                                                                                                                                                                                                                                                                                                                                                                                                                                                                                                                                                                                                                                                                                                                                                                                                                                                                                                                                                                                                                                                                                                                                                                                                                                                                                                                                                                                                                                                                                                                                                                                                                                                                                                                                                                                                                                                                                                                                                                                                                                                                                                                                                                                                                                                                                                                                                                                                                                                                                                                                                                                                                                                                                                                                                                                                                                                                                                                                                                                                                                                                                                                                                                                                                                                                                                                                                                                                                                                                                                                                                                                                                                                                                                                                                                                                                                                                                                                                                                                                                                                                                                                                                                                                                                                                                                                                                                                                                                                                                                                                                                                                                                                                                                                                                                                                                                                                                                                                                                                                                                                                                                                                                                                                                                                                                                                                                                                                                                                                                                                                                                                                                                                                                                                                                                                                                                                                                                                                                                                                                                                                                                                                                                                                                                                                                                                                                                                                                                                                                                                                                                                                                                                                                                                                                                                                                                                                                                                                                                                                                                                                                                                                                                                                                                                                                                                                                                                                                                                                                                             |
| VC_1206_0 | MH271298,MH271308,MH271320,MK880124,MT952845,MW862981,OK040779,ON970568                                                                                                                                                                                                                                                                                                                                                                                                                                                                                                                                                                                                                                                                                                                                                                                                                                                                                                                                                                                                                                                                                                                                                                                                                                                                                                                                                                                                                                                                                                                                                                                                                                                                                                                                                                                                                                                                                                                                                                                                                                                                                                                                                                                                                                                                                                                                                                                                                                                                                                                                                                                                                                                                                                                                                                                                                                                                                                                                                                                                                                                                                                                                                                                                                                                                                                                                                                                                                                                                                                                                                                                                                                                                                                                                                                                                                                                                                                                                                                                                                                                                                                                                                                                                                                                                                                                                                                                                                                                                                                                                                                                                                                                                                                                                                                                                                                                                                                                                                                                                                                                                                                                                                                                                                                                                                                                                                                                                                                                                                                                                                                                                                                                                                                                                                                                                                                                                                                                                                                                                                                                                                                                                                                                                                                                                                                                                                                                                                                                                                                                                                                                                                                                                                                                                                                                                                                                                                                                                                                                                                                                                                                                                                                                                                                                                                                                                                                                                                                                                                                                                                                                                                                                                                                                                                                                                                                                                                                                                                                                                                                                                                                                                                                                                                                                                                                                                                                                                                                                                                                                                                                                                                                                                                                                                                                                                                                                                                                                                                                                                                                                                                                                                                                                                                                                                                                                                                                                                                                                                                                                                                                                                                                                                                                                                                                                                                                                                |
| VC_1207_0 | MH834610,MH834619,MH834629,MK061413,MN703413,MN813676,MN908689,MT024869,MT024871,MT639653,MT889366,MT889375,MT889376,MT897906,MW055910,MZ005682,MZ681506,MZ747516,MZ820087,OK040777,OL455896,OL549188,OL549189,OL549191,OL549192,ON208833,ON528933,ON970616,OP434455                                                                                                                                                                                                                                                                                                                                                                                                                                                                                                                                                                                                                                                                                                                                                                                                                                                                                                                                                                                                                                                                                                                                                                                                                                                                                                                                                                                                                                                                                                                                                                                                                                                                                                                                                                                                                                                                                                                                                                                                                                                                                                                                                                                                                                                                                                                                                                                                                                                                                                                                                                                                                                                                                                                                                                                                                                                                                                                                                                                                                                                                                                                                                                                                                                                                                                                                                                                                                                                                                                                                                                                                                                                                                                                                                                                                                                                                                                                                                                                                                                                                                                                                                                                                                                                                                                                                                                                                                                                                                                                                                                                                                                                                                                                                                                                                                                                                                                                                                                                                                                                                                                                                                                                                                                                                                                                                                                                                                                                                                                                                                                                                                                                                                                                                                                                                                                                                                                                                                                                                                                                                                                                                                                                                                                                                                                                                                                                                                                                                                                                                                                                                                                                                                                                                                                                                                                                                                                                                                                                                                                                                                                                                                                                                                                                                                                                                                                                                                                                                                                                                                                                                                                                                                                                                                                                                                                                                                                                                                                                                                                                                                                                                                                                                                                                                                                                                                                                                                                                                                                                                                                                                                                                                                                                                                                                                                                                                                                                                                                                                                                                                                                                                                                                                                                                                                                                                                                                                                                                                                                                                                                                                                                                                   |
| VC_1208_0 | LR535901,LR535903,LR535904,LR535905,LR535906,LR535907,LR535908,LR535911,LR535912,LR535913,LR535917                                                                                                                                                                                                                                                                                                                                                                                                                                                                                                                                                                                                                                                                                                                                                                                                                                                                                                                                                                                                                                                                                                                                                                                                                                                                                                                                                                                                                                                                                                                                                                                                                                                                                                                                                                                                                                                                                                                                                                                                                                                                                                                                                                                                                                                                                                                                                                                                                                                                                                                                                                                                                                                                                                                                                                                                                                                                                                                                                                                                                                                                                                                                                                                                                                                                                                                                                                                                                                                                                                                                                                                                                                                                                                                                                                                                                                                                                                                                                                                                                                                                                                                                                                                                                                                                                                                                                                                                                                                                                                                                                                                                                                                                                                                                                                                                                                                                                                                                                                                                                                                                                                                                                                                                                                                                                                                                                                                                                                                                                                                                                                                                                                                                                                                                                                                                                                                                                                                                                                                                                                                                                                                                                                                                                                                                                                                                                                                                                                                                                                                                                                                                                                                                                                                                                                                                                                                                                                                                                                                                                                                                                                                                                                                                                                                                                                                                                                                                                                                                                                                                                                                                                                                                                                                                                                                                                                                                                                                                                                                                                                                                                                                                                                                                                                                                                                                                                                                                                                                                                                                                                                                                                                                                                                                                                                                                                                                                                                                                                                                                                                                                                                                                                                                                                                                                                                                                                                                                                                                                                                                                                                                                                                                                                                                                                                                                                                     |
| VC_121_0  | JQ177061,JQ177064,KJ572844,MN379460                                                                                                                                                                                                                                                                                                                                                                                                                                                                                                                                                                                                                                                                                                                                                                                                                                                                                                                                                                                                                                                                                                                                                                                                                                                                                                                                                                                                                                                                                                                                                                                                                                                                                                                                                                                                                                                                                                                                                                                                                                                                                                                                                                                                                                                                                                                                                                                                                                                                                                                                                                                                                                                                                                                                                                                                                                                                                                                                                                                                                                                                                                                                                                                                                                                                                                                                                                                                                                                                                                                                                                                                                                                                                                                                                                                                                                                                                                                                                                                                                                                                                                                                                                                                                                                                                                                                                                                                                                                                                                                                                                                                                                                                                                                                                                                                                                                                                                                                                                                                                                                                                                                                                                                                                                                                                                                                                                                                                                                                                                                                                                                                                                                                                                                                                                                                                                                                                                                                                                                                                                                                                                                                                                                                                                                                                                                                                                                                                                                                                                                                                                                                                                                                                                                                                                                                                                                                                                                                                                                                                                                                                                                                                                                                                                                                                                                                                                                                                                                                                                                                                                                                                                                                                                                                                                                                                                                                                                                                                                                                                                                                                                                                                                                                                                                                                                                                                                                                                                                                                                                                                                                                                                                                                                                                                                                                                                                                                                                                                                                                                                                                                                                                                                                                                                                                                                                                                                                                                                                                                                                                                                                                                                                                                                                                                                                                                                                                                                    |
| VC_1210_0 | MK250021,MK250023                                                                                                                                                                                                                                                                                                                                                                                                                                                                                                                                                                                                                                                                                                                                                                                                                                                                                                                                                                                                                                                                                                                                                                                                                                                                                                                                                                                                                                                                                                                                                                                                                                                                                                                                                                                                                                                                                                                                                                                                                                                                                                                                                                                                                                                                                                                                                                                                                                                                                                                                                                                                                                                                                                                                                                                                                                                                                                                                                                                                                                                                                                                                                                                                                                                                                                                                                                                                                                                                                                                                                                                                                                                                                                                                                                                                                                                                                                                                                                                                                                                                                                                                                                                                                                                                                                                                                                                                                                                                                                                                                                                                                                                                                                                                                                                                                                                                                                                                                                                                                                                                                                                                                                                                                                                                                                                                                                                                                                                                                                                                                                                                                                                                                                                                                                                                                                                                                                                                                                                                                                                                                                                                                                                                                                                                                                                                                                                                                                                                                                                                                                                                                                                                                                                                                                                                                                                                                                                                                                                                                                                                                                                                                                                                                                                                                                                                                                                                                                                                                                                                                                                                                                                                                                                                                                                                                                                                                                                                                                                                                                                                                                                                                                                                                                                                                                                                                                                                                                                                                                                                                                                                                                                                                                                                                                                                                                                                                                                                                                                                                                                                                                                                                                                                                                                                                                                                                                                                                                                                                                                                                                                                                                                                                                                                                                                                                                                                                                                      |
| VC_1210_1 | MK250020,MK250022,MK250024,MK250025,MK250026,MK250027,MK250028                                                                                                                                                                                                                                                                                                                                                                                                                                                                                                                                                                                                                                                                                                                                                                                                                                                                                                                                                                                                                                                                                                                                                                                                                                                                                                                                                                                                                                                                                                                                                                                                                                                                                                                                                                                                                                                                                                                                                                                                                                                                                                                                                                                                                                                                                                                                                                                                                                                                                                                                                                                                                                                                                                                                                                                                                                                                                                                                                                                                                                                                                                                                                                                                                                                                                                                                                                                                                                                                                                                                                                                                                                                                                                                                                                                                                                                                                                                                                                                                                                                                                                                                                                                                                                                                                                                                                                                                                                                                                                                                                                                                                                                                                                                                                                                                                                                                                                                                                                                                                                                                                                                                                                                                                                                                                                                                                                                                                                                                                                                                                                                                                                                                                                                                                                                                                                                                                                                                                                                                                                                                                                                                                                                                                                                                                                                                                                                                                                                                                                                                                                                                                                                                                                                                                                                                                                                                                                                                                                                                                                                                                                                                                                                                                                                                                                                                                                                                                                                                                                                                                                                                                                                                                                                                                                                                                                                                                                                                                                                                                                                                                                                                                                                                                                                                                                                                                                                                                                                                                                                                                                                                                                                                                                                                                                                                                                                                                                                                                                                                                                                                                                                                                                                                                                                                                                                                                                                                                                                                                                                                                                                                                                                                                                                                                                                                                                                                         |
| VC_1210_2 | MK250015,MK250016,MK250017,MK250018                                                                                                                                                                                                                                                                                                                                                                                                                                                                                                                                                                                                                                                                                                                                                                                                                                                                                                                                                                                                                                                                                                                                                                                                                                                                                                                                                                                                                                                                                                                                                                                                                                                                                                                                                                                                                                                                                                                                                                                                                                                                                                                                                                                                                                                                                                                                                                                                                                                                                                                                                                                                                                                                                                                                                                                                                                                                                                                                                                                                                                                                                                                                                                                                                                                                                                                                                                                                                                                                                                                                                                                                                                                                                                                                                                                                                                                                                                                                                                                                                                                                                                                                                                                                                                                                                                                                                                                                                                                                                                                                                                                                                                                                                                                                                                                                                                                                                                                                                                                                                                                                                                                                                                                                                                                                                                                                                                                                                                                                                                                                                                                                                                                                                                                                                                                                                                                                                                                                                                                                                                                                                                                                                                                                                                                                                                                                                                                                                                                                                                                                                                                                                                                                                                                                                                                                                                                                                                                                                                                                                                                                                                                                                                                                                                                                                                                                                                                                                                                                                                                                                                                                                                                                                                                                                                                                                                                                                                                                                                                                                                                                                                                                                                                                                                                                                                                                                                                                                                                                                                                                                                                                                                                                                                                                                                                                                                                                                                                                                                                                                                                                                                                                                                                                                                                                                                                                                                                                                                                                                                                                                                                                                                                                                                                                                                                                                                                                                                    |
| VC_1210_3 | MK250019,MK250029                                                                                                                                                                                                                                                                                                                                                                                                                                                                                                                                                                                                                                                                                                                                                                                                                                                                                                                                                                                                                                                                                                                                                                                                                                                                                                                                                                                                                                                                                                                                                                                                                                                                                                                                                                                                                                                                                                                                                                                                                                                                                                                                                                                                                                                                                                                                                                                                                                                                                                                                                                                                                                                                                                                                                                                                                                                                                                                                                                                                                                                                                                                                                                                                                                                                                                                                                                                                                                                                                                                                                                                                                                                                                                                                                                                                                                                                                                                                                                                                                                                                                                                                                                                                                                                                                                                                                                                                                                                                                                                                                                                                                                                                                                                                                                                                                                                                                                                                                                                                                                                                                                                                                                                                                                                                                                                                                                                                                                                                                                                                                                                                                                                                                                                                                                                                                                                                                                                                                                                                                                                                                                                                                                                                                                                                                                                                                                                                                                                                                                                                                                                                                                                                                                                                                                                                                                                                                                                                                                                                                                                                                                                                                                                                                                                                                                                                                                                                                                                                                                                                                                                                                                                                                                                                                                                                                                                                                                                                                                                                                                                                                                                                                                                                                                                                                                                                                                                                                                                                                                                                                                                                                                                                                                                                                                                                                                                                                                                                                                                                                                                                                                                                                                                                                                                                                                                                                                                                                                                                                                                                                                                                                                                                                                                                                                                                                                                                                                                      |
| VC_1211_0 | LT986678,MC945141,MC945453,MC945455,MC945456,MC945498,MC945509,MC945564,MC945664,MC945680,MC945683,MC945713,MC945716,MC945730,MC945784,MC945790,MC945813,MC945845,MK765557,MK765655,MK765661,MK765667,MT135342,OM869561,OM869610                                                                                                                                                                                                                                                                                                                                                                                                                                                                                                                                                                                                                                                                                                                                                                                                                                                                                                                                                                                                                                                                                                                                                                                                                                                                                                                                                                                                                                                                                                                                                                                                                                                                                                                                                                                                                                                                                                                                                                                                                                                                                                                                                                                                                                                                                                                                                                                                                                                                                                                                                                                                                                                                                                                                                                                                                                                                                                                                                                                                                                                                                                                                                                                                                                                                                                                                                                                                                                                                                                                                                                                                                                                                                                                                                                                                                                                                                                                                                                                                                                                                                                                                                                                                                                                                                                                                                                                                                                                                                                                                                                                                                                                                                                                                                                                                                                                                                                                                                                                                                                                                                                                                                                                                                                                                                                                                                                                                                                                                                                                                                                                                                                                                                                                                                                                                                                                                                                                                                                                                                                                                                                                                                                                                                                                                                                                                                                                                                                                                                                                                                                                                                                                                                                                                                                                                                                                                                                                                                                                                                                                                                                                                                                                                                                                                                                                                                                                                                                                                                                                                                                                                                                                                                                                                                                                                                                                                                                                                                                                                                                                                                                                                                                                                                                                                                                                                                                                                                                                                                                                                                                                                                                                                                                                                                                                                                                                                                                                                                                                                                                                                                                                                                                                                                                                                                                                                                                                                                                                                                                                                                                                                                                                                                                       |
| VC_1212_0 | MF101922,MH015251                                                                                                                                                                                                                                                                                                                                                                                                                                                                                                                                                                                                                                                                                                                                                                                                                                                                                                                                                                                                                                                                                                                                                                                                                                                                                                                                                                                                                                                                                                                                                                                                                                                                                                                                                                                                                                                                                                                                                                                                                                                                                                                                                                                                                                                                                                                                                                                                                                                                                                                                                                                                                                                                                                                                                                                                                                                                                                                                                                                                                                                                                                                                                                                                                                                                                                                                                                                                                                                                                                                                                                                                                                                                                                                                                                                                                                                                                                                                                                                                                                                                                                                                                                                                                                                                                                                                                                                                                                                                                                                                                                                                                                                                                                                                                                                                                                                                                                                                                                                                                                                                                                                                                                                                                                                                                                                                                                                                                                                                                                                                                                                                                                                                                                                                                                                                                                                                                                                                                                                                                                                                                                                                                                                                                                                                                                                                                                                                                                                                                                                                                                                                                                                                                                                                                                                                                                                                                                                                                                                                                                                                                                                                                                                                                                                                                                                                                                                                                                                                                                                                                                                                                                                                                                                                                                                                                                                                                                                                                                                                                                                                                                                                                                                                                                                                                                                                                                                                                                                                                                                                                                                                                                                                                                                                                                                                                                                                                                                                                                                                                                                                                                                                                                                                                                                                                                                                                                                                                                                                                                                                                                                                                                                                                                                                                                                                                                                                                                                      |
| VC_1213_0 | MF443783,MF443784                                                                                                                                                                                                                                                                                                                                                                                                                                                                                                                                                                                                                                                                                                                                                                                                                                                                                                                                                                                                                                                                                                                                                                                                                                                                                                                                                                                                                                                                                                                                                                                                                                                                                                                                                                                                                                                                                                                                                                                                                                                                                                                                                                                                                                                                                                                                                                                                                                                                                                                                                                                                                                                                                                                                                                                                                                                                                                                                                                                                                                                                                                                                                                                                                                                                                                                                                                                                                                                                                                                                                                                                                                                                                                                                                                                                                                                                                                                                                                                                                                                                                                                                                                                                                                                                                                                                                                                                                                                                                                                                                                                                                                                                                                                                                                                                                                                                                                                                                                                                                                                                                                                                                                                                                                                                                                                                                                                                                                                                                                                                                                                                                                                                                                                                                                                                                                                                                                                                                                                                                                                                                                                                                                                                                                                                                                                                                                                                                                                                                                                                                                                                                                                                                                                                                                                                                                                                                                                                                                                                                                                                                                                                                                                                                                                                                                                                                                                                                                                                                                                                                                                                                                                                                                                                                                                                                                                                                                                                                                                                                                                                                                                                                                                                                                                                                                                                                                                                                                                                                                                                                                                                                                                                                                                                                                                                                                                                                                                                                                                                                                                                                                                                                                                                                                                                                                                                                                                                                                                                                                                                                                                                                                                                                                                                                                                                                                                                                                                      |
| VC_1215_0 | MF580955,MF580957,MF580958                                                                                                                                                                                                                                                                                                                                                                                                                                                                                                                                                                                                                                                                                                                                                                                                                                                                                                                                                                                                                                                                                                                                                                                                                                                                                                                                                                                                                                                                                                                                                                                                                                                                                                                                                                                                                                                                                                                                                                                                                                                                                                                                                                                                                                                                                                                                                                                                                                                                                                                                                                                                                                                                                                                                                                                                                                                                                                                                                                                                                                                                                                                                                                                                                                                                                                                                                                                                                                                                                                                                                                                                                                                                                                                                                                                                                                                                                                                                                                                                                                                                                                                                                                                                                                                                                                                                                                                                                                                                                                                                                                                                                                                                                                                                                                                                                                                                                                                                                                                                                                                                                                                                                                                                                                                                                                                                                                                                                                                                                                                                                                                                                                                                                                                                                                                                                                                                                                                                                                                                                                                                                                                                                                                                                                                                                                                                                                                                                                                                                                                                                                                                                                                                                                                                                                                                                                                                                                                                                                                                                                                                                                                                                                                                                                                                                                                                                                                                                                                                                                                                                                                                                                                                                                                                                                                                                                                                                                                                                                                                                                                                                                                                                                                                                                                                                                                                                                                                                                                                                                                                                                                                                                                                                                                                                                                                                                                                                                                                                                                                                                                                                                                                                                                                                                                                                                                                                                                                                                                                                                                                                                                                                                                                                                                                                                                                                                                                                                             |
| VC_1216_0 | MF580956,MF580959,MF580960                                                                                                                                                                                                                                                                                                                                                                                                                                                                                                                                                                                                                                                                                                                                                                                                                                                                                                                                                                                                                                                                                                                                                                                                                                                                                                                                                                                                                                                                                                                                                                                                                                                                                                                                                                                                                                                                                                                                                                                                                                                                                                                                                                                                                                                                                                                                                                                                                                                                                                                                                                                                                                                                                                                                                                                                                                                                                                                                                                                                                                                                                                                                                                                                                                                                                                                                                                                                                                                                                                                                                                                                                                                                                                                                                                                                                                                                                                                                                                                                                                                                                                                                                                                                                                                                                                                                                                                                                                                                                                                                                                                                                                                                                                                                                                                                                                                                                                                                                                                                                                                                                                                                                                                                                                                                                                                                                                                                                                                                                                                                                                                                                                                                                                                                                                                                                                                                                                                                                                                                                                                                                                                                                                                                                                                                                                                                                                                                                                                                                                                                                                                                                                                                                                                                                                                                                                                                                                                                                                                                                                                                                                                                                                                                                                                                                                                                                                                                                                                                                                                                                                                                                                                                                                                                                                                                                                                                                                                                                                                                                                                                                                                                                                                                                                                                                                                                                                                                                                                                                                                                                                                                                                                                                                                                                                                                                                                                                                                                                                                                                                                                                                                                                                                                                                                                                                                                                                                                                                                                                                                                                                                                                                                                                                                                                                                                                                                                                                             |
| VC_1217_0 | MF580961,MF580962,MF629150                                                                                                                                                                                                                                                                                                                                                                                                                                                                                                                                                                                                                                                                                                                                                                                                                                                                                                                                                                                                                                                                                                                                                                                                                                                                                                                                                                                                                                                                                                                                                                                                                                                                                                                                                                                                                                                                                                                                                                                                                                                                                                                                                                                                                                                                                                                                                                                                                                                                                                                                                                                                                                                                                                                                                                                                                                                                                                                                                                                                                                                                                                                                                                                                                                                                                                                                                                                                                                                                                                                                                                                                                                                                                                                                                                                                                                                                                                                                                                                                                                                                                                                                                                                                                                                                                                                                                                                                                                                                                                                                                                                                                                                                                                                                                                                                                                                                                                                                                                                                                                                                                                                                                                                                                                                                                                                                                                                                                                                                                                                                                                                                                                                                                                                                                                                                                                                                                                                                                                                                                                                                                                                                                                                                                                                                                                                                                                                                                                                                                                                                                                                                                                                                                                                                                                                                                                                                                                                                                                                                                                                                                                                                                                                                                                                                                                                                                                                                                                                                                                                                                                                                                                                                                                                                                                                                                                                                                                                                                                                                                                                                                                                                                                                                                                                                                                                                                                                                                                                                                                                                                                                                                                                                                                                                                                                                                                                                                                                                                                                                                                                                                                                                                                                                                                                                                                                                                                                                                                                                                                                                                                                                                                                                                                                                                                                                                                                                                                             |
| VC_1218_0 | MF979562,MK080312,MT074429,MT074440                                                                                                                                                                                                                                                                                                                                                                                                                                                                                                                                                                                                                                                                                                                                                                                                                                                                                                                                                                                                                                                                                                                                                                                                                                                                                                                                                                                                                                                                                                                                                                                                                                                                                                                                                                                                                                                                                                                                                                                                                                                                                                                                                                                                                                                                                                                                                                                                                                                                                                                                                                                                                                                                                                                                                                                                                                                                                                                                                                                                                                                                                                                                                                                                                                                                                                                                                                                                                                                                                                                                                                                                                                                                                                                                                                                                                                                                                                                                                                                                                                                                                                                                                                                                                                                                                                                                                                                                                                                                                                                                                                                                                                                                                                                                                                                                                                                                                                                                                                                                                                                                                                                                                                                                                                                                                                                                                                                                                                                                                                                                                                                                                                                                                                                                                                                                                                                                                                                                                                                                                                                                                                                                                                                                                                                                                                                                                                                                                                                                                                                                                                                                                                                                                                                                                                                                                                                                                                                                                                                                                                                                                                                                                                                                                                                                                                                                                                                                                                                                                                                                                                                                                                                                                                                                                                                                                                                                                                                                                                                                                                                                                                                                                                                                                                                                                                                                                                                                                                                                                                                                                                                                                                                                                                                                                                                                                                                                                                                                                                                                                                                                                                                                                                                                                                                                                                                                                                                                                                                                                                                                                                                                                                                                                                                                                                                                                                                                                                    |
| VC_122_0  | MG592400,MG592422,MG592425,MG592448,MG592486                                                                                                                                                                                                                                                                                                                                                                                                                                                                                                                                                                                                                                                                                                                                                                                                                                                                                                                                                                                                                                                                                                                                                                                                                                                                                                                                                                                                                                                                                                                                                                                                                                                                                                                                                                                                                                                                                                                                                                                                                                                                                                                                                                                                                                                                                                                                                                                                                                                                                                                                                                                                                                                                                                                                                                                                                                                                                                                                                                                                                                                                                                                                                                                                                                                                                                                                                                                                                                                                                                                                                                                                                                                                                                                                                                                                                                                                                                                                                                                                                                                                                                                                                                                                                                                                                                                                                                                                                                                                                                                                                                                                                                                                                                                                                                                                                                                                                                                                                                                                                                                                                                                                                                                                                                                                                                                                                                                                                                                                                                                                                                                                                                                                                                                                                                                                                                                                                                                                                                                                                                                                                                                                                                                                                                                                                                                                                                                                                                                                                                                                                                                                                                                                                                                                                                                                                                                                                                                                                                                                                                                                                                                                                                                                                                                                                                                                                                                                                                                                                                                                                                                                                                                                                                                                                                                                                                                                                                                                                                                                                                                                                                                                                                                                                                                                                                                                                                                                                                                                                                                                                                                                                                                                                                                                                                                                                                                                                                                                                                                                                                                                                                                                                                                                                                                                                                                                                                                                                                                                                                                                                                                                                                                                                                                                                                                                                                                                                           |
| VC_122_1  | MG592434                                                                                                                                                                                                                                                                                                                                                                                                                                                                                                                                                                                                                                                                                                                                                                                                                                                                                                                                                                                                                                                                                                                                                                                                                                                                                                                                                                                                                                                                                                                                                                                                                                                                                                                                                                                                                                                                                                                                                                                                                                                                                                                                                                                                                                                                                                                                                                                                                                                                                                                                                                                                                                                                                                                                                                                                                                                                                                                                                                                                                                                                                                                                                                                                                                                                                                                                                                                                                                                                                                                                                                                                                                                                                                                                                                                                                                                                                                                                                                                                                                                                                                                                                                                                                                                                                                                                                                                                                                                                                                                                                                                                                                                                                                                                                                                                                                                                                                                                                                                                                                                                                                                                                                                                                                                                                                                                                                                                                                                                                                                                                                                                                                                                                                                                                                                                                                                                                                                                                                                                                                                                                                                                                                                                                                                                                                                                                                                                                                                                                                                                                                                                                                                                                                                                                                                                                                                                                                                                                                                                                                                                                                                                                                                                                                                                                                                                                                                                                                                                                                                                                                                                                                                                                                                                                                                                                                                                                                                                                                                                                                                                                                                                                                                                                                                                                                                                                                                                                                                                                                                                                                                                                                                                                                                                                                                                                                                                                                                                                                                                                                                                                                                                                                                                                                                                                                                                                                                                                                                                                                                                                                                                                                                                                                                                                                                                                                                                                                                               |
| VC_1222_0 | MG214764,MW202596,OL617037                                                                                                                                                                                                                                                                                                                                                                                                                                                                                                                                                                                                                                                                                                                                                                                                                                                                                                                                                                                                                                                                                                                                                                                                                                                                                                                                                                                                                                                                                                                                                                                                                                                                                                                                                                                                                                                                                                                                                                                                                                                                                                                                                                                                                                                                                                                                                                                                                                                                                                                                                                                                                                                                                                                                                                                                                                                                                                                                                                                                                                                                                                                                                                                                                                                                                                                                                                                                                                                                                                                                                                                                                                                                                                                                                                                                                                                                                                                                                                                                                                                                                                                                                                                                                                                                                                                                                                                                                                                                                                                                                                                                                                                                                                                                                                                                                                                                                                                                                                                                                                                                                                                                                                                                                                                                                                                                                                                                                                                                                                                                                                                                                                                                                                                                                                                                                                                                                                                                                                                                                                                                                                                                                                                                                                                                                                                                                                                                                                                                                                                                                                                                                                                                                                                                                                                                                                                                                                                                                                                                                                                                                                                                                                                                                                                                                                                                                                                                                                                                                                                                                                                                                                                                                                                                                                                                                                                                                                                                                                                                                                                                                                                                                                                                                                                                                                                                                                                                                                                                                                                                                                                                                                                                                                                                                                                                                                                                                                                                                                                                                                                                                                                                                                                                                                                                                                                                                                                                                                                                                                                                                                                                                                                                                                                                                                                                                                                                                                             |
| VC_1223_0 | MG269973,MW202566                                                                                                                                                                                                                                                                                                                                                                                                                                                                                                                                                                                                                                                                                                                                                                                                                                                                                                                                                                                                                                                                                                                                                                                                                                                                                                                                                                                                                                                                                                                                                                                                                                                                                                                                                                                                                                                                                                                                                                                                                                                                                                                                                                                                                                                                                                                                                                                                                                                                                                                                                                                                                                                                                                                                                                                                                                                                                                                                                                                                                                                                                                                                                                                                                                                                                                                                                                                                                                                                                                                                                                                                                                                                                                                                                                                                                                                                                                                                                                                                                                                                                                                                                                                                                                                                                                                                                                                                                                                                                                                                                                                                                                                                                                                                                                                                                                                                                                                                                                                                                                                                                                                                                                                                                                                                                                                                                                                                                                                                                                                                                                                                                                                                                                                                                                                                                                                                                                                                                                                                                                                                                                                                                                                                                                                                                                                                                                                                                                                                                                                                                                                                                                                                                                                                                                                                                                                                                                                                                                                                                                                                                                                                                                                                                                                                                                                                                                                                                                                                                                                                                                                                                                                                                                                                                                                                                                                                                                                                                                                                                                                                                                                                                                                                                                                                                                                                                                                                                                                                                                                                                                                                                                                                                                                                                                                                                                                                                                                                                                                                                                                                                                                                                                                                                                                                                                                                                                                                                                                                                                                                                                                                                                                                                                                                                                                                                                                                                                                      |
| VC_1224_0 | MG515223,MG518519,MG518520,MG663582,MG663583,MG663584,MG663585,MG663586,MH155868,MK112550,MN119376,MN284894,MN994275,MT684596,MZ622160,OL455897,ON108647,ON970569,OP021678                                                                                                                                                                                                                                                                                                                                                                                                                                                                                                                                                                                                                                                                                                                                                                                                                                                                                                                                                                                                                                                                                                                                                                                                                                                                                                                                                                                                                                                                                                                                                                                                                                                                                                                                                                                                                                                                                                                                                                                                                                                                                                                                                                                                                                                                                                                                                                                                                                                                                                                                                                                                                                                                                                                                                                                                                                                                                                                                                                                                                                                                                                                                                                                                                                                                                                                                                                                                                                                                                                                                                                                                                                                                                                                                                                                                                                                                                                                                                                                                                                                                                                                                                                                                                                                                                                                                                                                                                                                                                                                                                                                                                                                                                                                                                                                                                                                                                                                                                                                                                                                                                                                                                                                                                                                                                                                                                                                                                                                                                                                                                                                                                                                                                                                                                                                                                                                                                                                                                                                                                                                                                                                                                                                                                                                                                                                                                                                                                                                                                                                                                                                                                                                                                                                                                                                                                                                                                                                                                                                                                                                                                                                                                                                                                                                                                                                                                                                                                                                                                                                                                                                                                                                                                                                                                                                                                                                                                                                                                                                                                                                                                                                                                                                                                                                                                                                                                                                                                                                                                                                                                                                                                                                                                                                                                                                                                                                                                                                                                                                                                                                                                                                                                                                                                                                                                                                                                                                                                                                                                                                                                                                                                                                                                                                                                             |
| VC_1225_0 | MG592394,MG592402,MG592427,MG592455                                                                                                                                                                                                                                                                                                                                                                                                                                                                                                                                                                                                                                                                                                                                                                                                                                                                                                                                                                                                                                                                                                                                                                                                                                                                                                                                                                                                                                                                                                                                                                                                                                                                                                                                                                                                                                                                                                                                                                                                                                                                                                                                                                                                                                                                                                                                                                                                                                                                                                                                                                                                                                                                                                                                                                                                                                                                                                                                                                                                                                                                                                                                                                                                                                                                                                                                                                                                                                                                                                                                                                                                                                                                                                                                                                                                                                                                                                                                                                                                                                                                                                                                                                                                                                                                                                                                                                                                                                                                                                                                                                                                                                                                                                                                                                                                                                                                                                                                                                                                                                                                                                                                                                                                                                                                                                                                                                                                                                                                                                                                                                                                                                                                                                                                                                                                                                                                                                                                                                                                                                                                                                                                                                                                                                                                                                                                                                                                                                                                                                                                                                                                                                                                                                                                                                                                                                                                                                                                                                                                                                                                                                                                                                                                                                                                                                                                                                                                                                                                                                                                                                                                                                                                                                                                                                                                                                                                                                                                                                                                                                                                                                                                                                                                                                                                                                                                                                                                                                                                                                                                                                                                                                                                                                                                                                                                                                                                                                                                                                                                                                                                                                                                                                                                                                                                                                                                                                                                                                                                                                                                                                                                                                                                                                                                                                                                                                                                                                    |
| VC_1226_0 | MG592533,MG592560                                                                                                                                                                                                                                                                                                                                                                                                                                                                                                                                                                                                                                                                                                                                                                                                                                                                                                                                                                                                                                                                                                                                                                                                                                                                                                                                                                                                                                                                                                                                                                                                                                                                                                                                                                                                                                                                                                                                                                                                                                                                                                                                                                                                                                                                                                                                                                                                                                                                                                                                                                                                                                                                                                                                                                                                                                                                                                                                                                                                                                                                                                                                                                                                                                                                                                                                                                                                                                                                                                                                                                                                                                                                                                                                                                                                                                                                                                                                                                                                                                                                                                                                                                                                                                                                                                                                                                                                                                                                                                                                                                                                                                                                                                                                                                                                                                                                                                                                                                                                                                                                                                                                                                                                                                                                                                                                                                                                                                                                                                                                                                                                                                                                                                                                                                                                                                                                                                                                                                                                                                                                                                                                                                                                                                                                                                                                                                                                                                                                                                                                                                                                                                                                                                                                                                                                                                                                                                                                                                                                                                                                                                                                                                                                                                                                                                                                                                                                                                                                                                                                                                                                                                                                                                                                                                                                                                                                                                                                                                                                                                                                                                                                                                                                                                                                                                                                                                                                                                                                                                                                                                                                                                                                                                                                                                                                                                                                                                                                                                                                                                                                                                                                                                                                                                                                                                                                                                                                                                                                                                                                                                                                                                                                                                                                                                                                                                                                                                                      |
| VC_1227_0 | MG592536,MG592554,MG592555,MG592556,MG592591,MG592625                                                                                                                                                                                                                                                                                                                                                                                                                                                                                                                                                                                                                                                                                                                                                                                                                                                                                                                                                                                                                                                                                                                                                                                                                                                                                                                                                                                                                                                                                                                                                                                                                                                                                                                                                                                                                                                                                                                                                                                                                                                                                                                                                                                                                                                                                                                                                                                                                                                                                                                                                                                                                                                                                                                                                                                                                                                                                                                                                                                                                                                                                                                                                                                                                                                                                                                                                                                                                                                                                                                                                                                                                                                                                                                                                                                                                                                                                                                                                                                                                                                                                                                                                                                                                                                                                                                                                                                                                                                                                                                                                                                                                                                                                                                                                                                                                                                                                                                                                                                                                                                                                                                                                                                                                                                                                                                                                                                                                                                                                                                                                                                                                                                                                                                                                                                                                                                                                                                                                                                                                                                                                                                                                                                                                                                                                                                                                                                                                                                                                                                                                                                                                                                                                                                                                                                                                                                                                                                                                                                                                                                                                                                                                                                                                                                                                                                                                                                                                                                                                                                                                                                                                                                                                                                                                                                                                                                                                                                                                                                                                                                                                                                                                                                                                                                                                                                                                                                                                                                                                                                                                                                                                                                                                                                                                                                                                                                                                                                                                                                                                                                                                                                                                                                                                                                                                                                                                                                                                                                                                                                                                                                                                                                                                                                                                                                                                                                                                  |
| VC_1228_0 | MK373772,OP136151                                                                                                                                                                                                                                                                                                                                                                                                                                                                                                                                                                                                                                                                                                                                                                                                                                                                                                                                                                                                                                                                                                                                                                                                                                                                                                                                                                                                                                                                                                                                                                                                                                                                                                                                                                                                                                                                                                                                                                                                                                                                                                                                                                                                                                                                                                                                                                                                                                                                                                                                                                                                                                                                                                                                                                                                                                                                                                                                                                                                                                                                                                                                                                                                                                                                                                                                                                                                                                                                                                                                                                                                                                                                                                                                                                                                                                                                                                                                                                                                                                                                                                                                                                                                                                                                                                                                                                                                                                                                                                                                                                                                                                                                                                                                                                                                                                                                                                                                                                                                                                                                                                                                                                                                                                                                                                                                                                                                                                                                                                                                                                                                                                                                                                                                                                                                                                                                                                                                                                                                                                                                                                                                                                                                                                                                                                                                                                                                                                                                                                                                                                                                                                                                                                                                                                                                                                                                                                                                                                                                                                                                                                                                                                                                                                                                                                                                                                                                                                                                                                                                                                                                                                                                                                                                                                                                                                                                                                                                                                                                                                                                                                                                                                                                                                                                                                                                                                                                                                                                                                                                                                                                                                                                                                                                                                                                                                                                                                                                                                                                                                                                                                                                                                                                                                                                                                                                                                                                                                                                                                                                                                                                                                                                                                                                                                                                                                                                                                                      |
| VC_1229_0 | MG592596,MW824384,MW824385,MW824386,MW824395,MW824396,MW824397                                                                                                                                                                                                                                                                                                                                                                                                                                                                                                                                                                                                                                                                                                                                                                                                                                                                                                                                                                                                                                                                                                                                                                                                                                                                                                                                                                                                                                                                                                                                                                                                                                                                                                                                                                                                                                                                                                                                                                                                                                                                                                                                                                                                                                                                                                                                                                                                                                                                                                                                                                                                                                                                                                                                                                                                                                                                                                                                                                                                                                                                                                                                                                                                                                                                                                                                                                                                                                                                                                                                                                                                                                                                                                                                                                                                                                                                                                                                                                                                                                                                                                                                                                                                                                                                                                                                                                                                                                                                                                                                                                                                                                                                                                                                                                                                                                                                                                                                                                                                                                                                                                                                                                                                                                                                                                                                                                                                                                                                                                                                                                                                                                                                                                                                                                                                                                                                                                                                                                                                                                                                                                                                                                                                                                                                                                                                                                                                                                                                                                                                                                                                                                                                                                                                                                                                                                                                                                                                                                                                                                                                                                                                                                                                                                                                                                                                                                                                                                                                                                                                                                                                                                                                                                                                                                                                                                                                                                                                                                                                                                                                                                                                                                                                                                                                                                                                                                                                                                                                                                                                                                                                                                                                                                                                                                                                                                                                                                                                                                                                                                                                                                                                                                                                                                                                                                                                                                                                                                                                                                                                                                                                                                                                                                                                                                                                                                                                         |
| VC_123_0  | JX866719,KJ021043,KX237516,MF663761,MG197810,MG432137,MK521906,MK685667,MK798142,MN689778,MT559528,MT757392,MT894004,MZ374361,MZ398021,MZ398245,MZ504995,OK499978,ON086804,ON602758,ON807605,ON809560,OP114730                                                                                                                                                                                                                                                                                                                                                                                                                                                                                                                                                                                                                                                                                                                                                                                                                                                                                                                                                                                                                                                                                                                                                                                                                                                                                                                                                                                                                                                                                                                                                                                                                                                                                                                                                                                                                                                                                                                                                                                                                                                                                                                                                                                                                                                                                                                                                                                                                                                                                                                                                                                                                                                                                                                                                                                                                                                                                                                                                                                                                                                                                                                                                                                                                                                                                                                                                                                                                                                                                                                                                                                                                                                                                                                                                                                                                                                                                                                                                                                                                                                                                                                                                                                                                                                                                                                                                                                                                                                                                                                                                                                                                                                                                                                                                                                                                                                                                                                                                                                                                                                                                                                                                                                                                                                                                                                                                                                                                                                                                                                                                                                                                                                                                                                                                                                                                                                                                                                                                                                                                                                                                                                                                                                                                                                                                                                                                                                                                                                                                                                                                                                                                                                                                                                                                                                                                                                                                                                                                                                                                                                                                                                                                                                                                                                                                                                                                                                                                                                                                                                                                                                                                                                                                                                                                                                                                                                                                                                                                                                                                                                                                                                                                                                                                                                                                                                                                                                                                                                                                                                                                                                                                                                                                                                                                                                                                                                                                                                                                                                                                                                                                                                                                                                                                                                                                                                                                                                                                                                                                                                                                                                                                                                                                                                         |
| VC_1230_0 | MG945523,MC945677,OM869552                                                                                                                                                                                                                                                                                                                                                                                                                                                                                                                                                                                                                                                                                                                                                                                                                                                                                                                                                                                                                                                                                                                                                                                                                                                                                                                                                                                                                                                                                                                                                                                                                                                                                                                                                                                                                                                                                                                                                                                                                                                                                                                                                                                                                                                                                                                                                                                                                                                                                                                                                                                                                                                                                                                                                                                                                                                                                                                                                                                                                                                                                                                                                                                                                                                                                                                                                                                                                                                                                                                                                                                                                                                                                                                                                                                                                                                                                                                                                                                                                                                                                                                                                                                                                                                                                                                                                                                                                                                                                                                                                                                                                                                                                                                                                                                                                                                                                                                                                                                                                                                                                                                                                                                                                                                                                                                                                                                                                                                                                                                                                                                                                                                                                                                                                                                                                                                                                                                                                                                                                                                                                                                                                                                                                                                                                                                                                                                                                                                                                                                                                                                                                                                                                                                                                                                                                                                                                                                                                                                                                                                                                                                                                                                                                                                                                                                                                                                                                                                                                                                                                                                                                                                                                                                                                                                                                                                                                                                                                                                                                                                                                                                                                                                                                                                                                                                                                                                                                                                                                                                                                                                                                                                                                                                                                                                                                                                                                                                                                                                                                                                                                                                                                                                                                                                                                                                                                                                                                                                                                                                                                                                                                                                                                                                                                                                                                                                                                                             |
| VC_1231_0 | MZ089785,OM869555                                                                                                                                                                                                                                                                                                                                                                                                                                                                                                                                                                                                                                                                                                                                                                                                                                                                                                                                                                                                                                                                                                                                                                                                                                                                                                                                                                                                                                                                                                                                                                                                                                                                                                                                                                                                                                                                                                                                                                                                                                                                                                                                                                                                                                                                                                                                                                                                                                                                                                                                                                                                                                                                                                                                                                                                                                                                                                                                                                                                                                                                                                                                                                                                                                                                                                                                                                                                                                                                                                                                                                                                                                                                                                                                                                                                                                                                                                                                                                                                                                                                                                                                                                                                                                                                                                                                                                                                                                                                                                                                                                                                                                                                                                                                                                                                                                                                                                                                                                                                                                                                                                                                                                                                                                                                                                                                                                                                                                                                                                                                                                                                                                                                                                                                                                                                                                                                                                                                                                                                                                                                                                                                                                                                                                                                                                                                                                                                                                                                                                                                                                                                                                                                                                                                                                                                                                                                                                                                                                                                                                                                                                                                                                                                                                                                                                                                                                                                                                                                                                                                                                                                                                                                                                                                                                                                                                                                                                                                                                                                                                                                                                                                                                                                                                                                                                                                                                                                                                                                                                                                                                                                                                                                                                                                                                                                                                                                                                                                                                                                                                                                                                                                                                                                                                                                                                                                                                                                                                                                                                                                                                                                                                                                                                                                                                                                                                                                                                                      |
| VC_1232_0 | MG641185,MC945667                                                                                                                                                                                                                                                                                                                                                                                                                                                                                                                                                                                                                                                                                                                                                                                                                                                                                                                                                                                                                                                                                                                                                                                                                                                                                                                                                                                                                                                                                                                                                                                                                                                                                                                                                                                                                                                                                                                                                                                                                                                                                                                                                                                                                                                                                                                                                                                                                                                                                                                                                                                                                                                                                                                                                                                                                                                                                                                                                                                                                                                                                                                                                                                                                                                                                                                                                                                                                                                                                                                                                                                                                                                                                                                                                                                                                                                                                                                                                                                                                                                                                                                                                                                                                                                                                                                                                                                                                                                                                                                                                                                                                                                                                                                                                                                                                                                                                                                                                                                                                                                                                                                                                                                                                                                                                                                                                                                                                                                                                                                                                                                                                                                                                                                                                                                                                                                                                                                                                                                                                                                                                                                                                                                                                                                                                                                                                                                                                                                                                                                                                                                                                                                                                                                                                                                                                                                                                                                                                                                                                                                                                                                                                                                                                                                                                                                                                                                                                                                                                                                                                                                                                                                                                                                                                                                                                                                                                                                                                                                                                                                                                                                                                                                                                                                                                                                                                                                                                                                                                                                                                                                                                                                                                                                                                                                                                                                                                                                                                                                                                                                                                                                                                                                                                                                                                                                                                                                                                                                                                                                                                                                                                                                                                                                                                                                                                                                                                                                      |
| VC_1233_0 | MG641188,MC945130,MC945256,MC945457,MC945557,MC945725,MC945757,MN379637,MN379647,MT135339,MT135348,MT135361,MT135384,MT135409,MT135435,OL617023                                                                                                                                                                                                                                                                                                                                                                                                                                                                                                                                                                                                                                                                                                                                                                                                                                                                                                                                                                                                                                                                                                                                                                                                                                                                                                                                                                                                                                                                                                                                                                                                                                                                                                                                                                                                                                                                                                                                                                                                                                                                                                                                                                                                                                                                                                                                                                                                                                                                                                                                                                                                                                                                                                                                                                                                                                                                                                                                                                                                                                                                                                                                                                                                                                                                                                                                                                                                                                                                                                                                                                                                                                                                                                                                                                                                                                                                                                                                                                                                                                                                                                                                                                                                                                                                                                                                                                                                                                                                                                                                                                                                                                                                                                                                                                                                                                                                                                                                                                                                                                                                                                                                                                                                                                                                                                                                                                                                                                                                                                                                                                                                                                                                                                                                                                                                                                                                                                                                                                                                                                                                                                                                                                                                                                                                                                                                                                                                                                                                                                                                                                                                                                                                                                                                                                                                                                                                                                                                                                                                                                                                                                                                                                                                                                                                                                                                                                                                                                                                                                                                                                                                                                                                                                                                                                                                                                                                                                                                                                                                                                                                                                                                                                                                                                                                                                                                                                                                                                                                                                                                                                                                                                                                                                                                                                                                                                                                                                                                                                                                                                                                                                                                                                                                                                                                                                                                                                                                                                                                                                                                                                                                                                                                                                                                                                                        |
| VC_1234_0 | MG670586,MH045566,MH045567,MH045568,MH509447,MH834596,MH834599,MH834602,MH834604,MH834626,MK814753,MK937598,MK937610,MN062714,MN062717,MN183281,MN329675,MT024860,MT310853,MT310896,MT639649,MT818427,MT889365,MT889372,MT889389,MT889392,MW601221,MW601224,MW712721,MW924640,MW924647,MZ322012,MZ747513,MZ820083,OK318958,OK999979,OK999981,OL742562,OM818329,ON724018,OP172875,OP434439,OP434443,OP434445                                                                                                                                                                                                                                                                                                                                                                                                                                                                                                                                                                                                                                                                                                                                                                                                                                                                                                                                                                                                                                                                                                                                                                                                                                                                                                                                                                                                                                                                                                                                                                                                                                                                                                                                                                                                                                                                                                                                                                                                                                                                                                                                                                                                                                                                                                                                                                                                                                                                                                                                                                                                                                                                                                                                                                                                                                                                                                                                                                                                                                                                                                                                                                                                                                                                                                                                                                                                                                                                                                                                                                                                                                                                                                                                                                                                                                                                                                                                                                                                                                                                                                                                                                                                                                                                                                                                                                                                                                                                                                                                                                                                                                                                                                                                                                                                                                                                                                                                                                                                                                                                                                                                                                                                                                                                                                                                                                                                                                                                                                                                                                                                                                                                                                                                                                                                                                                                                                                                                                                                                                                                                                                                                                                                                                                                                                                                                                                                                                                                                                                                                                                                                                                                                                                                                                                                                                                                                                                                                                                                                                                                                                                                                                                                                                                                                                                                                                                                                                                                                                                                                                                                                                                                                                                                                                                                                                                                                                                                                                                                                                                                                                                                                                                                                                                                                                                                                                                                                                                                                                                                                                                                                                                                                                                                                                                                                                                                                                                                                                                                                                                                                                                                                                                                                                                                                                                                                                                                                                                                                                                            |
| VC_124_0  | KP977490,MW960031                                                                                                                                                                                                                                                                                                                                                                                                                                                                                                                                                                                                                                                                                                                                                                                                                                                                                                                                                                                                                                                                                                                                                                                                                                                                                                                                                                                                                                                                                                                                                                                                                                                                                                                                                                                                                                                                                                                                                                                                                                                                                                                                                                                                                                                                                                                                                                                                                                                                                                                                                                                                                                                                                                                                                                                                                                                                                                                                                                                                                                                                                                                                                                                                                                                                                                                                                                                                                                                                                                                                                                                                                                                                                                                                                                                                                                                                                                                                                                                                                                                                                                                                                                                                                                                                                                                                                                                                                                                                                                                                                                                                                                                                                                                                                                                                                                                                                                                                                                                                                                                                                                                                                                                                                                                                                                                                                                                                                                                                                                                                                                                                                                                                                                                                                                                                                                                                                                                                                                                                                                                                                                                                                                                                                                                                                                                                                                                                                                                                                                                                                                                                                                                                                                                                                                                                                                                                                                                                                                                                                                                                                                                                                                                                                                                                                                                                                                                                                                                                                                                                                                                                                                                                                                                                                                                                                                                                                                                                                                                                                                                                                                                                                                                                                                                                                                                                                                                                                                                                                                                                                                                                                                                                                                                                                                                                                                                                                                                                                                                                                                                                                                                                                                                                                                                                                                                                                                                                                                                                                                                                                                                                                                                                                                                                                                                                                                                                                                                      |
| VC_1240_0 | MG839015,MG839016,MG839017,MG839018,MG839020,MG839021,MG839022,MG839023,MG839026,MG839028,MG839029,MG920061,MC925352,MC944219,MC944222,MC962360,MC962367,MH045554,MH045558,MH045560,MH045562,MH045563,MH045564,MH045565,MH153802,MH153805,MH153806,MH153811,MH153813,MH153814,MH153815,MH153816,MH153817,MH153818,MH153819,MH153820,MH153821,MH153822,MH153823,MH153824,MH153825,MH153826,MH153827,MH153828,MH153829,MH153830,MH153831,MH153832,MH153833,MH153834,MH153835,MH153836,MH153837,MH153838,MH153839,MH153840,MH153841,MH153842,MH153843,MH153844,MH153845,MH153846,MH153847,MH153848,MH153849,MH153850,MH153851,MH153852,MH153853,MH153854,MH153855,MH153856,MH153857,MH153858,MH153859,MH153860,MH153861,MH153862,MH153863,MH153864,MH153865,MH153866,MH153867,MH153868,MH153869,MH153870,MH153871,MH153872,MH153873,MH153874,MH153875,MH153876,MH153877,MH153878,MH153879,MH153880,MH153881,MH153882,MH153883,MH153884,MH153885,MH153886,MH153887,MH153888,MH153889,MH153890,MH153891,MH153892,MH153893,MH153894,MH153895,MH153896,MH153897,MH153898,MH153899,MH153900,MH153901,MH153902,MH153903,MH153904,MH153905,MH153906,MH153907,MH153908,MH153909,MH153910,MH153911,MH153912,MH153913,MH153914,MH153915,MH153916,MH153917,MH153918,MH153919,MH153920,MH153921,MH153922,MH153923,MH153924,MH153925,MH153926,MH153927,MH153928,MH153929,MH153930,MH153931,MH153932,MH153933,MH153934,MH153935,MH153936,MH153937,MH153938,MH153939,MH153940,MH153941,MH153942,MH153943,MH153944,MH153945,MH153946,MH153947,MH153948,MH153949,MH153950,MH153951,MH153952,MH153953,MH153954,MH153955,MH153956,MH153957,MH153958,MH153959,MH153960,MH153961,MH153962,MH153963,MH153964,MH153965,MH153966,MH153967,MH153968,MH153969,MH153970,MH153971,MH153972,MH153973,MH153974,MH153975,MH153976,MH153977,MH153978,MH153979,MH153980,MH153981,MH153982,MH153983,MH153984,MH153985,MH153986,MH153987,MH153988,MH153989,MH153990,MH153991,MH153992,MH153993,MH153994,MH153995,MH153996,MH153997,MH153998,MH153999,MH154000,MH154001,MH154002,MH154003,MH154004,MH154005,MH154006,MH154007,MH154008,MH154009,MH154010,MH154011,MH154012,MH154013,MH154014,MH154015,MH154016,MH154017,MH154018,MH154019,MH154020,MH154021,MH154022,MH154023,MH154024,MH154025,MH154026,MH154027,MH154028,MH154029,MH154030,MH154031,MH154032,MH154033,MH154034,MH154035,MH154036,MH154037,MH154038,MH154039,MH154040,MH154041,MH154042,MH154043,MH154044,MH154045,MH154046,MH154047,MH154048,MH154049,MH154050,MH154051,MH154052,MH154053,MH154054,MH154055,MH154056,MH154057,MH154058,MH154059,MH154060,MH154061,MH154062,MH154063,MH154064,MH154065,MH154066,MH154067,MH154068,MH154069,MH154070,MH154071,MH154072,MH154073,MH154074,MH154075,MH154076,MH154077,MH154078,MH154079,MH154080,MH154081,MH154082,MH154083,MH154084,MH154085,MH154086,MH154087,MH154088,MH154089,MH154090,MH154091,MH154092,MH154093,MH154094,MH154095,MH154096,MH154097,MH154098,MH154099,MH154100,MH154101,MH154102,MH154103,MH154104,MH154105,MH154106,MH154107,MH154108,MH154109,MH154110,MH154111,MH154112,MH154113,MH154114,MH154115,MH154116,MH154117,MH154118,MH154119,MH154120,MH154121,MH154122,MH154123,MH154124,MH154125,MH154126,MH154127,MH154128,MH154129,MH154130,MH154131,MH154132,MH154133,MH154134,MH154135,MH154136,MH154137,MH154138,MH154139,MH154140,MH154141,MH154142,MH154143,MH154144,MH154145,MH154146,MH154147,MH154148,MH154149,MH154150,MH154151,MH154152,MH154153,MH154154,MH154155,MH154156,MH154157,MH154158,MH154159,MH154160,MH154161,MH154162,MH154163,MH154164,MH154165,MH154166,MH154167,MH154168,MH154169,MH154170,MH154171,MH154172,MH154173,MH154174,MH154175,MH154176,MH154177,MH154178,MH154179,MH154180,MH154181,MH154182,MH154183,MH154184,MH154185,MH154186,MH154187,MH154188,MH154189,MH154190,MH154191,MH154192,MH154193,MH154194,MH154195,MH154196,MH154197,MH154198,MH154199,MH154200,MH154201,MH154202,MH154203,MH154204,MH154205,MH154206,MH154207,MH154208,MH154209,MH154210,MH154211,MH154212,MH154213,MH154214,MH154215,MH154216,MH154217,MH154218,MH154219,MH154220,MH154221,MH154222,MH154223,MH154224,MH154225,MH154226,MH154227,MH154228,MH154229,MH154230,MH154231,MH154232,MH154233,MH154234,MH154235,MH154236,MH154237,MH154238,MH154239,MH154240,MH154241,MH154242,MH154243,MH154244,MH154245,MH154246,MH154247,MH154248,MH154249,MH154250,MH154251,MH154252,MH154253,MH154254,MH154255,MH154256,MH154257,MH154258,MH154259,MH154260,MH154261,MH154262,MH154263,MH154264,MH154265,MH154266,MH154267,MH154268,MH154269,MH154270,MH154271,MH154272,MH154273,MH154274,MH154275,MH154276,MH154277,MH154278,MH154279,MH154280,MH154281,MH154282,MH154283,MH154284,MH154285,MH154286,MH154287,MH154288,MH154289,MH154290,MH154291,MH154292,MH154293,MH154294,MH154295,MH154296,MH154297,MH154298,MH154299,MH154300,MH154301,MH154302,MH154303,MH154304,MH154305,MH154306,MH154307,MH154308,MH154309,MH154310,MH154311,MH154312,MH154313,MH154314,MH154315,MH154316,MH154317,MH154318,MH154319,MH154320,MH154321,MH154322,MH154323,MH154324,MH154325,MH154326,MH154327,MH154328,MH154329,MH154330,MH154331,MH154332,MH154333,MH154334,MH154335,MH154336,MH154337,MH154338,MH154339,MH154340,MH154341,MH154342,MH154343,MH154344,MH154345,MH154346,MH154347,MH154348,MH154349,MH154350,MH154351,MH154352,MH154353,MH154354,MH154355,MH154356,MH154357,MH154358,MH154359,MH154360,MH154361,MH154362,MH154363,MH154364,MH154365,MH154366,MH154367,MH154368,MH154369,MH154370,MH154371,MH154372,MH154373,MH154374,MH154375,MH154376,MH154377,MH154378,MH154379,MH154380,MH154381,MH154382,MH154383,MH154384,MH154385,MH154386,MH154387,MH154388,MH154389,MH154390,MH154391,MH154392,MH154393,MH154394,MH154395,MH154396,MH154397,MH154398,MH154399,MH154400,MH154401,MH154402,MH154403,MH154404,MH154405,MH154406,MH154407,MH154408,MH154409,MH154410,MH154411,MH154412,MH154413,MH154414,MH154415,MH154416,MH154417,MH154418,MH154419,MH154420,MH154421,MH154422,MH154423,MH154424,MH154425,MH154426,MH154427,MH154428,MH154429,MH154430,MH154431,MH154432,MH154433,MH154434,MH154435,MH154436,MH154437,MH154438,MH154439,MH154440,MH154441,MH154442,MH154443,MH154444,MH154445,MH154446,MH154447,MH154448,MH154449,MH154450,MH154451,MH154452,MH154453,MH154454,MH154455,MH154456,MH154457,MH154458,MH154459,MH154460,MH154461,MH154462,MH154463,MH154464,MH154465,MH154466,MH154467,MH154468,MH154469,MH154470,MH154471,MH154472,MH154473,MH154474,MH154475,MH154476,MH154477,MH154478,MH154479,MH154480,MH154481,MH154482,MH154483,MH154484,MH154485,MH154486,MH154487,MH154488,MH154489,MH154490,MH154491,MH154492,MH154493,MH154494,MH154495,MH154496,MH154497,MH154498,MH154499,MH154500,MH154501,MH154502,MH154503,MH154504,MH154505,MH154506,MH154507,MH154508,MH154509,MH154510,MH154511,MH154512,MH154513,MH154514,MH154515,MH154516,MH154517,MH154518,MH154519,MH154520,MH154521,MH154522,MH154523,MH154524,MH154525,MH154526,MH154527,MH154528,MH154529,MH154530,MH154531,MH154532,MH154533,MH154534,MH154535,MH154536,MH154537,MH154538,MH154539,MH154540,MH154541,MH154542,MH154543,MH154544,MH154545,MH154546,MH154547,MH154548,MH154549,MH154550,MH154551,MH154552,MH154553,MH154554,MH154555,MH154556,MH154557,MH154558,MH154559,MH154560,MH154561,MH154562,MH154563,MH154564,MH154565,MH154566,MH154567,MH154568,MH154569,MH154570,MH154571,MH154572,MH154573,MH154574,MH154575,MH154576,MH154577,MH154578,MH154579,MH154580,MH154581,MH154582,MH154583,MH154584,MH154585,MH154586,MH154587,MH154588,MH154589,MH154590,MH154591,MH154592,MH154593,MH154594,MH154595,MH154596,MH154597,MH154598,MH154599,MH154600,MH154601,MH154602,MH154603,MH154604,MH154605,MH154606,MH154607,MH154608,MH154609,MH154610,MH154611,MH154612,MH154613,MH154614,MH154615,MH154616,MH154617,MH154618,MH154619,MH154620,MH154621,MH154622,MH154623,MH154624,MH154625,MH154626,MH154627,MH154628,MH154629,MH154630,MH154631,MH154632,MH154633,MH154634,MH154635,MH154636,MH154637,MH154638,MH154639,MH154640,MH154641,MH154642,MH154643,MH154644,MH154645,MH154646,MH154647,MH154648,MH154649,MH154650,MH154651,MH154652,MH154653,MH154654,MH154655,MH154656,MH154657,MH154658,MH154659,MH154660,MH154661,MH154662,MH154663,MH154664,MH154665,MH154666,MH154667,MH154668,MH154669,MH154670,MH154671,MH154672,MH154673,MH154674,MH154675,MH154676,MH154677,MH154678,MH154679,MH154680,MH154681,MH154682,MH154683,MH154684,MH154685,MH154686,MH154687,MH154688,MH154689,MH154690,MH154691,MH154692,MH154693,MH154694,MH154695,MH154696,MH154697,MH154698,MH154699,MH154700,MH154701,MH154702,MH154703,MH154704,MH154705,MH154706,MH154707,MH154708,MH154709,MH154710,MH154711,MH154712,MH154713,MH154714,MH154715,MH154716,MH154717,MH154718,MH154719,MH154720,MH154721,MH154722,MH154723,MH154724,MH154725,MH154726,MH154727,MH154728,MH154729,MH154730,MH154731,MH154732,MH154733,MH154734,MH154735,MH154736,MH154737,MH154738,MH154739,MH154740,MH154741,MH154742,MH154743,MH154744,MH154745,MH154746,MH154747,MH154748,MH154749,MH154750,MH154751,MH154752,MH154753,MH154754,MH154755,MH154756,MH154757,MH154758,MH154759,MH154760,MH154761,MH154762,MH154763,MH154764,MH154765,MH154766,MH154767,MH154768,MH154769,MH154770,MH154771,MH154772,MH154773,MH154774,MH154775,MH154776,MH154777,MH154778,MH154779,MH154780,MH154781,MH154782,MH154783,MH154784,MH154785,MH154786,MH154787,MH154788,MH154789,MH154790,MH154791,MH154792,MH154793,MH154794,MH154795,MH154796,MH154797,MH154798,MH154799,MH154800,MH154801,MH154802,MH154803,MH154804,MH154805,MH154806,MH154807,MH154808,MH154809,MH154810,MH154811,MH154812,MH154813,MH154814,MH154815,MH154816,MH154817,MH154818,MH154819,MH154820,MH154821,MH154822,MH154823,MH154824,MH154825,MH154826,MH154827,MH154828,MH154829,MH154830,MH154831,MH154832,MH154833,MH154834,MH154835,MH154836,MH154837,MH154838,MH154839,MH154840,MH154841,MH154842,MH154843,MH154844,MH |



VC\_1268\_0 MG945212, MG945582, MT135345  
VC\_127\_0 MF663786  
VC\_127\_1 OL614104  
VC\_127\_2 MT711888  
VC\_1270\_0 MG945214, MT135380, MT135423  
VC\_1271\_0 MG945230, MT135357  
VC\_1272\_0 MG945235, MG945392, MT135388, MT135443, MT135462  
VC\_1273\_0 MG945236, MG945822, MT135358, MT135377, MT135426, MT135427  
VC\_1274\_0 MG945567, MG945631  
VC\_1275\_0 MG945252, MG945584, MN379645, OM869494  
VC\_1277\_0 MG945494, MG945563, MG945585, MK765590, MN379638, MN379648, MT135333, MT135379, MT135391, MT135401, MT135437, MT135445, OM869612, OM869668  
VC\_1278\_0 MG945425, MG945789, MT135415  
VC\_1279\_0 MG945258, MG945434, MT135434, MT135451  
VC\_1280\_0 MK765572, OM869521  
VC\_1281\_0 MG945278, MG945285, MG945492, MG945605, MG945751, MG945812, MG945825  
VC\_1282\_0 MG945280, MK765649, OM869500  
VC\_1283\_0 MK765552, MK765553, MK765556, MK765560, MK765562, MK765565, MK765591, MK765592, MK765593, MK765596, MK765606, MK765607, MK765609, MK765611, MK765612, MK765613, MK765615, MK765633, MK765648, MK765651, MK765657, MK765658, MK765660, MK765666, MT135276, MT135425  
VC\_1285\_0 MG945316, MG945344, MG945468, MG945524, MG945556, MG945562, MG945579, MG945612, MG945640, MG945668, MG945712, MG945733, MG945806, MG945814, MK765571, MK765574, MK765576, MK765577, MK765580, MT135330, MT135406, MT135431, MT135458, OL617036, OM869623  
VC\_1286\_0 MG945328  
VC\_1287\_0 MG945331, MG945343, MG945490, MG945501, MG945665, MG945729, MG945782  
VC\_1288\_0 MG945335, MG945778, MT135385  
VC\_1289\_0 MG945336, MT135365  
VC\_129\_0 AF949143, KJ507099, KR091952, KU064779, KY798120, KY798121, KY917611, LC730319, LN889756, LN889995, LN913017, MG250485, MG775258, MN729595, MN729596, MN729597, MN729598, MN729599, MN729600, MT104465, MT104466, MT711889, MT711890, MW812345, MZ501272, MZ598487, MZ826344, MZ826345, MZ826346, MZ826347, MZ826348, MZ826349, MZ826351, MZ826352, MZ826354, OK523998, OK523999, OL581611, OM256450, OM282085, OM471789, OM630590, ON189046  
VC\_1290\_0 MG945337, MT135410  
VC\_1291\_0 MG945345, MG945818  
VC\_1292\_0 MG945348, MG945702, MK496732  
VC\_1293\_0 MG945350, MG945432, MG945755, MT135447  
VC\_1294\_0 MG945354, MG945576, MG945637, MK496765, OM869571, OP209176  
VC\_1295\_0 MG945360, MG945478, MG945614  
VC\_1296\_0 MG945362, MK496704, MK496729, MK496782  
VC\_1297\_0 MG945395, MG945421, MG945480, MG945539, MG945696, MK496696, MK496711  
VC\_1298\_0 MG945397, MT135331, MT135461  
VC\_1299\_0 MG945409, OM869563  
VC\_130\_0 AB775549, FR823298, GU583987, JX173487, KP025626, KX431888, KX449361, KX449362, KX449363, MH179472, MH179475, MH179478, MH268168, MK033137, MT094431, MT711887, OK094519, OM131411, ON109291  
VC\_1300\_0 MG945412, MG945828  
VC\_1301\_0 MG945417, MG945419  
VC\_1302\_0 MG945427, MG945574, MT135411  
VC\_1303\_0 MG945439, MG945628, MK496757, MK765601, MZ089768, OM869696  
VC\_1304\_0 MZ089804, MZ089807, OM869574, OM869576, OM869577, OM869592, OM869653  
VC\_1305\_0 MG945469, MG945824, MT135353, MT135400, MT135402  
VC\_1306\_0 MG945483, MT135420  
VC\_1307\_0 MT135397, MT135407  
VC\_1308\_0 MG945500, MG945621, MH572369, MK765583, MT135326, OM869498, OM869502, OM869505, OM869587, OM869604, OM869633, OM869691  
VC\_1309\_0 MT135328, OM869626  
VC\_131\_0 HE600015, KJ716335, KM209228, KM209270, KM209320, KY942056, KY942057, MG266157, MH807812, MH807820, MN788369, MN813048, MN813049, MN813050, MN813051, MN813052, MN813053  
VC\_131\_1 MW650886, OL656110, ON184125, ON184126, ON212266, ON862890  
VC\_131\_2 FJ373894, JX181829, LC373201, MK509462, MT078988, OL615011, OL615013  
VC\_131\_3 MT857002  
VC\_1310\_0 MG945504, MG945617  
VC\_1311\_0 MG945529, MG945568, MG945717, MG945739, MT135265  
VC\_1312\_0 MG945533, MT135343, MT135416  
VC\_1313\_0 MZ089798, MZ089799, MZ089800, MZ089801, MZ089803, MZ089805, OM869557, OM869648, OM869652, OM869654, OM869655, OM869666, OM869684  
VC\_1314\_0 MZ089796, MZ089797, OM869566, OM869568  
VC\_1315\_0 MT135349, MT135363, MT135392, MT135408  
VC\_1319\_0 MG945554, MG945575  
VC\_132\_0 JX878496, KX452697, MF285619, MH929319  
VC\_132\_1 AB797215, KX147096, KY073123, MG428990, MG428991, MG770379, MK373783, MN045230, MN478483, MZ634341, ON202820, ON323462, ON399185, OX335402, OX335403, OX335405, OX335416  
VC\_1321\_0 MZ089770, MZ089772, MZ089780, OM869514, OM869529, OM869540, OM869542, OM869544, OM869548, OM869553, OM869589, OM869590, OM869638, OM869707  
VC\_1322\_0 MG945615, MT135372  
VC\_1323\_0 MH572374, MH572375, MH572376, MH572414, MH572485, MH572522  
VC\_1324\_0 MG945619, MH572524, MH992173, MZ364234  
VC\_1325\_0 MK765555, MK765567, MK765600, MK765610, MK765617, MK765659, MK765664  
VC\_1326\_0 MG945690, MK496692  
VC\_1327\_0 MG945724, MT135383, MT135403, MT135456  
VC\_1328\_0 MG945766, MG945823  
VC\_1329\_0 MG945769, MG945792  
VC\_133\_0 KF669653, KF669654  
VC\_133\_1 MG428992  
VC\_133\_10 MH709121, MN871504, MZ375357, MZ375358, OL964736, OL964737, OL964738, OL964746, OL964747, OL964753  
VC\_133\_11 MW006476, MW006480  
VC\_133\_12 MN871494, MN871495  
VC\_133\_13 JN126049, LR800396  
VC\_133\_14 KX438380, MN953776, OM681507  
VC\_133\_15 KX765865, MW388005  
VC\_133\_16 KJ174318



|           |                                                                                                                                                                                                                                                                                                                                                                                                                                                                                                                                                                                                                                                                                                                                                                                                                                                                                                                                                                                                                                                                                                                                                                                                                                                                                                                                                                                                                                                                                                                                                                                                                                                                                                                                                                                                                                                                                                                                                                                                                                                                                                                                                                                                                                                                                                                                                                                                                                                                                                                                                                                                                                                                                                                                                                                                                                                                                                                                                                                                                                                                                                                                                                                                                                                                                                                                                                                                                                                                                                                                                                                                                                                                                                                                                                                                                                                                                                                                                                                                                                                                                                                                                                                                                                                                                                                                                                                                                                                                                                                                                                                                                                                                                                                                                                                                                                                                                                                                                                                                                                                                                                                                                                                                                                                                                                                                                                                                                                                                                                                                                                                                                                                                                                                                                                                                                                                                                                                                                                                                                                                                                                                                                                                                                                                                                                                                                                                                                                                                                                                                                                                                                                                                                                                                                                                                                                                                                                                                                                                                                                                                                                                                                                                                                                                                                                                                                                                                                                                                                                                                                                                                                                                                                                                                                                                                                                                                                                                                                                                                                                                                                                                                                                                                                                                                                                                                                                                                                                                                                                                                                                                                                                                                                                                                                                                                                                                                                                                                                                                                                                                                                                                                                                                                                                                                                                                                                                                                                                                                                                                                                                                                                                                                                                                                                                                                                                                                                                                                                                                                                                                                                                                                                                                                                                                                                                                                                                                                                                                                                                                                                                                                                                                                                                                                                                                                                                                                                                                                                                                                                                                                                                                                                                                                                                                                                                                                                                                                                                                                                                                                                                                                                                                                                     |
|-----------|-------------------------------------------------------------------------------------------------------------------------------------------------------------------------------------------------------------------------------------------------------------------------------------------------------------------------------------------------------------------------------------------------------------------------------------------------------------------------------------------------------------------------------------------------------------------------------------------------------------------------------------------------------------------------------------------------------------------------------------------------------------------------------------------------------------------------------------------------------------------------------------------------------------------------------------------------------------------------------------------------------------------------------------------------------------------------------------------------------------------------------------------------------------------------------------------------------------------------------------------------------------------------------------------------------------------------------------------------------------------------------------------------------------------------------------------------------------------------------------------------------------------------------------------------------------------------------------------------------------------------------------------------------------------------------------------------------------------------------------------------------------------------------------------------------------------------------------------------------------------------------------------------------------------------------------------------------------------------------------------------------------------------------------------------------------------------------------------------------------------------------------------------------------------------------------------------------------------------------------------------------------------------------------------------------------------------------------------------------------------------------------------------------------------------------------------------------------------------------------------------------------------------------------------------------------------------------------------------------------------------------------------------------------------------------------------------------------------------------------------------------------------------------------------------------------------------------------------------------------------------------------------------------------------------------------------------------------------------------------------------------------------------------------------------------------------------------------------------------------------------------------------------------------------------------------------------------------------------------------------------------------------------------------------------------------------------------------------------------------------------------------------------------------------------------------------------------------------------------------------------------------------------------------------------------------------------------------------------------------------------------------------------------------------------------------------------------------------------------------------------------------------------------------------------------------------------------------------------------------------------------------------------------------------------------------------------------------------------------------------------------------------------------------------------------------------------------------------------------------------------------------------------------------------------------------------------------------------------------------------------------------------------------------------------------------------------------------------------------------------------------------------------------------------------------------------------------------------------------------------------------------------------------------------------------------------------------------------------------------------------------------------------------------------------------------------------------------------------------------------------------------------------------------------------------------------------------------------------------------------------------------------------------------------------------------------------------------------------------------------------------------------------------------------------------------------------------------------------------------------------------------------------------------------------------------------------------------------------------------------------------------------------------------------------------------------------------------------------------------------------------------------------------------------------------------------------------------------------------------------------------------------------------------------------------------------------------------------------------------------------------------------------------------------------------------------------------------------------------------------------------------------------------------------------------------------------------------------------------------------------------------------------------------------------------------------------------------------------------------------------------------------------------------------------------------------------------------------------------------------------------------------------------------------------------------------------------------------------------------------------------------------------------------------------------------------------------------------------------------------------------------------------------------------------------------------------------------------------------------------------------------------------------------------------------------------------------------------------------------------------------------------------------------------------------------------------------------------------------------------------------------------------------------------------------------------------------------------------------------------------------------------------------------------------------------------------------------------------------------------------------------------------------------------------------------------------------------------------------------------------------------------------------------------------------------------------------------------------------------------------------------------------------------------------------------------------------------------------------------------------------------------------------------------------------------------------------------------------------------------------------------------------------------------------------------------------------------------------------------------------------------------------------------------------------------------------------------------------------------------------------------------------------------------------------------------------------------------------------------------------------------------------------------------------------------------------------------------------------------------------------------------------------------------------------------------------------------------------------------------------------------------------------------------------------------------------------------------------------------------------------------------------------------------------------------------------------------------------------------------------------------------------------------------------------------------------------------------------------------------------------------------------------------------------------------------------------------------------------------------------------------------------------------------------------------------------------------------------------------------------------------------------------------------------------------------------------------------------------------------------------------------------------------------------------------------------------------------------------------------------------------------------------------------------------------------------------------------------------------------------------------------------------------------------------------------------------------------------------------------------------------------------------------------------------------------------------------------------------------------------------------------------------------------------------------------------------------------------------------------------------------------------------------------------------------------------------------------------------------------------------------------------------------------------------------------------------------------------------------------------------------------------------------------------------------------------------------------------------------------------------------------------------------------------------------------------------------------------------------------------------------------------------------------------------------------------------------------------------------------------------------------------------------------------------------------------------------------------------------------------------------------------------------------------------------------------------------------------------------------------------------------------------------------------------------------------------------------------------------------------------------------------------------------------------------------------------------------------------------------------------------------------------------------------------------------------------------------------------------------------------------------------------------------------------------------------------------------------------------------------------------------------------------------------------------------------------------------------------------------------------------------------------------------------------------------------------------------------------------------------------------------------------------------------------------------------------------------------------------------------------------------------------------------------------------------------------------------------------------------------------------------------------------------------------------------------------------------------------------------------------------------------------------------------------------------------------------------------------------------------------------------------------------------------------------|
| VC_133_17 | MH709120                                                                                                                                                                                                                                                                                                                                                                                                                                                                                                                                                                                                                                                                                                                                                                                                                                                                                                                                                                                                                                                                                                                                                                                                                                                                                                                                                                                                                                                                                                                                                                                                                                                                                                                                                                                                                                                                                                                                                                                                                                                                                                                                                                                                                                                                                                                                                                                                                                                                                                                                                                                                                                                                                                                                                                                                                                                                                                                                                                                                                                                                                                                                                                                                                                                                                                                                                                                                                                                                                                                                                                                                                                                                                                                                                                                                                                                                                                                                                                                                                                                                                                                                                                                                                                                                                                                                                                                                                                                                                                                                                                                                                                                                                                                                                                                                                                                                                                                                                                                                                                                                                                                                                                                                                                                                                                                                                                                                                                                                                                                                                                                                                                                                                                                                                                                                                                                                                                                                                                                                                                                                                                                                                                                                                                                                                                                                                                                                                                                                                                                                                                                                                                                                                                                                                                                                                                                                                                                                                                                                                                                                                                                                                                                                                                                                                                                                                                                                                                                                                                                                                                                                                                                                                                                                                                                                                                                                                                                                                                                                                                                                                                                                                                                                                                                                                                                                                                                                                                                                                                                                                                                                                                                                                                                                                                                                                                                                                                                                                                                                                                                                                                                                                                                                                                                                                                                                                                                                                                                                                                                                                                                                                                                                                                                                                                                                                                                                                                                                                                                                                                                                                                                                                                                                                                                                                                                                                                                                                                                                                                                                                                                                                                                                                                                                                                                                                                                                                                                                                                                                                                                                                                                                                                                                                                                                                                                                                                                                                                                                                                                                                                                                                                                                            |
| VC_133_18 | KR296692                                                                                                                                                                                                                                                                                                                                                                                                                                                                                                                                                                                                                                                                                                                                                                                                                                                                                                                                                                                                                                                                                                                                                                                                                                                                                                                                                                                                                                                                                                                                                                                                                                                                                                                                                                                                                                                                                                                                                                                                                                                                                                                                                                                                                                                                                                                                                                                                                                                                                                                                                                                                                                                                                                                                                                                                                                                                                                                                                                                                                                                                                                                                                                                                                                                                                                                                                                                                                                                                                                                                                                                                                                                                                                                                                                                                                                                                                                                                                                                                                                                                                                                                                                                                                                                                                                                                                                                                                                                                                                                                                                                                                                                                                                                                                                                                                                                                                                                                                                                                                                                                                                                                                                                                                                                                                                                                                                                                                                                                                                                                                                                                                                                                                                                                                                                                                                                                                                                                                                                                                                                                                                                                                                                                                                                                                                                                                                                                                                                                                                                                                                                                                                                                                                                                                                                                                                                                                                                                                                                                                                                                                                                                                                                                                                                                                                                                                                                                                                                                                                                                                                                                                                                                                                                                                                                                                                                                                                                                                                                                                                                                                                                                                                                                                                                                                                                                                                                                                                                                                                                                                                                                                                                                                                                                                                                                                                                                                                                                                                                                                                                                                                                                                                                                                                                                                                                                                                                                                                                                                                                                                                                                                                                                                                                                                                                                                                                                                                                                                                                                                                                                                                                                                                                                                                                                                                                                                                                                                                                                                                                                                                                                                                                                                                                                                                                                                                                                                                                                                                                                                                                                                                                                                                                                                                                                                                                                                                                                                                                                                                                                                                                                                                                                            |
| VC_133_19 | MN871500,MT074475                                                                                                                                                                                                                                                                                                                                                                                                                                                                                                                                                                                                                                                                                                                                                                                                                                                                                                                                                                                                                                                                                                                                                                                                                                                                                                                                                                                                                                                                                                                                                                                                                                                                                                                                                                                                                                                                                                                                                                                                                                                                                                                                                                                                                                                                                                                                                                                                                                                                                                                                                                                                                                                                                                                                                                                                                                                                                                                                                                                                                                                                                                                                                                                                                                                                                                                                                                                                                                                                                                                                                                                                                                                                                                                                                                                                                                                                                                                                                                                                                                                                                                                                                                                                                                                                                                                                                                                                                                                                                                                                                                                                                                                                                                                                                                                                                                                                                                                                                                                                                                                                                                                                                                                                                                                                                                                                                                                                                                                                                                                                                                                                                                                                                                                                                                                                                                                                                                                                                                                                                                                                                                                                                                                                                                                                                                                                                                                                                                                                                                                                                                                                                                                                                                                                                                                                                                                                                                                                                                                                                                                                                                                                                                                                                                                                                                                                                                                                                                                                                                                                                                                                                                                                                                                                                                                                                                                                                                                                                                                                                                                                                                                                                                                                                                                                                                                                                                                                                                                                                                                                                                                                                                                                                                                                                                                                                                                                                                                                                                                                                                                                                                                                                                                                                                                                                                                                                                                                                                                                                                                                                                                                                                                                                                                                                                                                                                                                                                                                                                                                                                                                                                                                                                                                                                                                                                                                                                                                                                                                                                                                                                                                                                                                                                                                                                                                                                                                                                                                                                                                                                                                                                                                                                                                                                                                                                                                                                                                                                                                                                                                                                                                                                                                   |
| VC_133_2  | MT074472                                                                                                                                                                                                                                                                                                                                                                                                                                                                                                                                                                                                                                                                                                                                                                                                                                                                                                                                                                                                                                                                                                                                                                                                                                                                                                                                                                                                                                                                                                                                                                                                                                                                                                                                                                                                                                                                                                                                                                                                                                                                                                                                                                                                                                                                                                                                                                                                                                                                                                                                                                                                                                                                                                                                                                                                                                                                                                                                                                                                                                                                                                                                                                                                                                                                                                                                                                                                                                                                                                                                                                                                                                                                                                                                                                                                                                                                                                                                                                                                                                                                                                                                                                                                                                                                                                                                                                                                                                                                                                                                                                                                                                                                                                                                                                                                                                                                                                                                                                                                                                                                                                                                                                                                                                                                                                                                                                                                                                                                                                                                                                                                                                                                                                                                                                                                                                                                                                                                                                                                                                                                                                                                                                                                                                                                                                                                                                                                                                                                                                                                                                                                                                                                                                                                                                                                                                                                                                                                                                                                                                                                                                                                                                                                                                                                                                                                                                                                                                                                                                                                                                                                                                                                                                                                                                                                                                                                                                                                                                                                                                                                                                                                                                                                                                                                                                                                                                                                                                                                                                                                                                                                                                                                                                                                                                                                                                                                                                                                                                                                                                                                                                                                                                                                                                                                                                                                                                                                                                                                                                                                                                                                                                                                                                                                                                                                                                                                                                                                                                                                                                                                                                                                                                                                                                                                                                                                                                                                                                                                                                                                                                                                                                                                                                                                                                                                                                                                                                                                                                                                                                                                                                                                                                                                                                                                                                                                                                                                                                                                                                                                                                                                                                                                            |
| VC_133_20 | OM367911                                                                                                                                                                                                                                                                                                                                                                                                                                                                                                                                                                                                                                                                                                                                                                                                                                                                                                                                                                                                                                                                                                                                                                                                                                                                                                                                                                                                                                                                                                                                                                                                                                                                                                                                                                                                                                                                                                                                                                                                                                                                                                                                                                                                                                                                                                                                                                                                                                                                                                                                                                                                                                                                                                                                                                                                                                                                                                                                                                                                                                                                                                                                                                                                                                                                                                                                                                                                                                                                                                                                                                                                                                                                                                                                                                                                                                                                                                                                                                                                                                                                                                                                                                                                                                                                                                                                                                                                                                                                                                                                                                                                                                                                                                                                                                                                                                                                                                                                                                                                                                                                                                                                                                                                                                                                                                                                                                                                                                                                                                                                                                                                                                                                                                                                                                                                                                                                                                                                                                                                                                                                                                                                                                                                                                                                                                                                                                                                                                                                                                                                                                                                                                                                                                                                                                                                                                                                                                                                                                                                                                                                                                                                                                                                                                                                                                                                                                                                                                                                                                                                                                                                                                                                                                                                                                                                                                                                                                                                                                                                                                                                                                                                                                                                                                                                                                                                                                                                                                                                                                                                                                                                                                                                                                                                                                                                                                                                                                                                                                                                                                                                                                                                                                                                                                                                                                                                                                                                                                                                                                                                                                                                                                                                                                                                                                                                                                                                                                                                                                                                                                                                                                                                                                                                                                                                                                                                                                                                                                                                                                                                                                                                                                                                                                                                                                                                                                                                                                                                                                                                                                                                                                                                                                                                                                                                                                                                                                                                                                                                                                                                                                                                                                                                            |
| VC_133_21 | MK972690                                                                                                                                                                                                                                                                                                                                                                                                                                                                                                                                                                                                                                                                                                                                                                                                                                                                                                                                                                                                                                                                                                                                                                                                                                                                                                                                                                                                                                                                                                                                                                                                                                                                                                                                                                                                                                                                                                                                                                                                                                                                                                                                                                                                                                                                                                                                                                                                                                                                                                                                                                                                                                                                                                                                                                                                                                                                                                                                                                                                                                                                                                                                                                                                                                                                                                                                                                                                                                                                                                                                                                                                                                                                                                                                                                                                                                                                                                                                                                                                                                                                                                                                                                                                                                                                                                                                                                                                                                                                                                                                                                                                                                                                                                                                                                                                                                                                                                                                                                                                                                                                                                                                                                                                                                                                                                                                                                                                                                                                                                                                                                                                                                                                                                                                                                                                                                                                                                                                                                                                                                                                                                                                                                                                                                                                                                                                                                                                                                                                                                                                                                                                                                                                                                                                                                                                                                                                                                                                                                                                                                                                                                                                                                                                                                                                                                                                                                                                                                                                                                                                                                                                                                                                                                                                                                                                                                                                                                                                                                                                                                                                                                                                                                                                                                                                                                                                                                                                                                                                                                                                                                                                                                                                                                                                                                                                                                                                                                                                                                                                                                                                                                                                                                                                                                                                                                                                                                                                                                                                                                                                                                                                                                                                                                                                                                                                                                                                                                                                                                                                                                                                                                                                                                                                                                                                                                                                                                                                                                                                                                                                                                                                                                                                                                                                                                                                                                                                                                                                                                                                                                                                                                                                                                                                                                                                                                                                                                                                                                                                                                                                                                                                                                                                            |
| VC_133_22 | FQ312032,JX128257,JX181828,KJ174317,MH427377,MH688040,MH940212,MN066127,MN342150,MW021753,MW021757,OK322699,OP610151                                                                                                                                                                                                                                                                                                                                                                                                                                                                                                                                                                                                                                                                                                                                                                                                                                                                                                                                                                                                                                                                                                                                                                                                                                                                                                                                                                                                                                                                                                                                                                                                                                                                                                                                                                                                                                                                                                                                                                                                                                                                                                                                                                                                                                                                                                                                                                                                                                                                                                                                                                                                                                                                                                                                                                                                                                                                                                                                                                                                                                                                                                                                                                                                                                                                                                                                                                                                                                                                                                                                                                                                                                                                                                                                                                                                                                                                                                                                                                                                                                                                                                                                                                                                                                                                                                                                                                                                                                                                                                                                                                                                                                                                                                                                                                                                                                                                                                                                                                                                                                                                                                                                                                                                                                                                                                                                                                                                                                                                                                                                                                                                                                                                                                                                                                                                                                                                                                                                                                                                                                                                                                                                                                                                                                                                                                                                                                                                                                                                                                                                                                                                                                                                                                                                                                                                                                                                                                                                                                                                                                                                                                                                                                                                                                                                                                                                                                                                                                                                                                                                                                                                                                                                                                                                                                                                                                                                                                                                                                                                                                                                                                                                                                                                                                                                                                                                                                                                                                                                                                                                                                                                                                                                                                                                                                                                                                                                                                                                                                                                                                                                                                                                                                                                                                                                                                                                                                                                                                                                                                                                                                                                                                                                                                                                                                                                                                                                                                                                                                                                                                                                                                                                                                                                                                                                                                                                                                                                                                                                                                                                                                                                                                                                                                                                                                                                                                                                                                                                                                                                                                                                                                                                                                                                                                                                                                                                                                                                                                                                                                                                                                |
| VC_133_23 | MT074470                                                                                                                                                                                                                                                                                                                                                                                                                                                                                                                                                                                                                                                                                                                                                                                                                                                                                                                                                                                                                                                                                                                                                                                                                                                                                                                                                                                                                                                                                                                                                                                                                                                                                                                                                                                                                                                                                                                                                                                                                                                                                                                                                                                                                                                                                                                                                                                                                                                                                                                                                                                                                                                                                                                                                                                                                                                                                                                                                                                                                                                                                                                                                                                                                                                                                                                                                                                                                                                                                                                                                                                                                                                                                                                                                                                                                                                                                                                                                                                                                                                                                                                                                                                                                                                                                                                                                                                                                                                                                                                                                                                                                                                                                                                                                                                                                                                                                                                                                                                                                                                                                                                                                                                                                                                                                                                                                                                                                                                                                                                                                                                                                                                                                                                                                                                                                                                                                                                                                                                                                                                                                                                                                                                                                                                                                                                                                                                                                                                                                                                                                                                                                                                                                                                                                                                                                                                                                                                                                                                                                                                                                                                                                                                                                                                                                                                                                                                                                                                                                                                                                                                                                                                                                                                                                                                                                                                                                                                                                                                                                                                                                                                                                                                                                                                                                                                                                                                                                                                                                                                                                                                                                                                                                                                                                                                                                                                                                                                                                                                                                                                                                                                                                                                                                                                                                                                                                                                                                                                                                                                                                                                                                                                                                                                                                                                                                                                                                                                                                                                                                                                                                                                                                                                                                                                                                                                                                                                                                                                                                                                                                                                                                                                                                                                                                                                                                                                                                                                                                                                                                                                                                                                                                                                                                                                                                                                                                                                                                                                                                                                                                                                                                                                                            |
| VC_133_24 | MF001362                                                                                                                                                                                                                                                                                                                                                                                                                                                                                                                                                                                                                                                                                                                                                                                                                                                                                                                                                                                                                                                                                                                                                                                                                                                                                                                                                                                                                                                                                                                                                                                                                                                                                                                                                                                                                                                                                                                                                                                                                                                                                                                                                                                                                                                                                                                                                                                                                                                                                                                                                                                                                                                                                                                                                                                                                                                                                                                                                                                                                                                                                                                                                                                                                                                                                                                                                                                                                                                                                                                                                                                                                                                                                                                                                                                                                                                                                                                                                                                                                                                                                                                                                                                                                                                                                                                                                                                                                                                                                                                                                                                                                                                                                                                                                                                                                                                                                                                                                                                                                                                                                                                                                                                                                                                                                                                                                                                                                                                                                                                                                                                                                                                                                                                                                                                                                                                                                                                                                                                                                                                                                                                                                                                                                                                                                                                                                                                                                                                                                                                                                                                                                                                                                                                                                                                                                                                                                                                                                                                                                                                                                                                                                                                                                                                                                                                                                                                                                                                                                                                                                                                                                                                                                                                                                                                                                                                                                                                                                                                                                                                                                                                                                                                                                                                                                                                                                                                                                                                                                                                                                                                                                                                                                                                                                                                                                                                                                                                                                                                                                                                                                                                                                                                                                                                                                                                                                                                                                                                                                                                                                                                                                                                                                                                                                                                                                                                                                                                                                                                                                                                                                                                                                                                                                                                                                                                                                                                                                                                                                                                                                                                                                                                                                                                                                                                                                                                                                                                                                                                                                                                                                                                                                                                                                                                                                                                                                                                                                                                                                                                                                                                                                                                                            |
| VC_133_25 | JN593240                                                                                                                                                                                                                                                                                                                                                                                                                                                                                                                                                                                                                                                                                                                                                                                                                                                                                                                                                                                                                                                                                                                                                                                                                                                                                                                                                                                                                                                                                                                                                                                                                                                                                                                                                                                                                                                                                                                                                                                                                                                                                                                                                                                                                                                                                                                                                                                                                                                                                                                                                                                                                                                                                                                                                                                                                                                                                                                                                                                                                                                                                                                                                                                                                                                                                                                                                                                                                                                                                                                                                                                                                                                                                                                                                                                                                                                                                                                                                                                                                                                                                                                                                                                                                                                                                                                                                                                                                                                                                                                                                                                                                                                                                                                                                                                                                                                                                                                                                                                                                                                                                                                                                                                                                                                                                                                                                                                                                                                                                                                                                                                                                                                                                                                                                                                                                                                                                                                                                                                                                                                                                                                                                                                                                                                                                                                                                                                                                                                                                                                                                                                                                                                                                                                                                                                                                                                                                                                                                                                                                                                                                                                                                                                                                                                                                                                                                                                                                                                                                                                                                                                                                                                                                                                                                                                                                                                                                                                                                                                                                                                                                                                                                                                                                                                                                                                                                                                                                                                                                                                                                                                                                                                                                                                                                                                                                                                                                                                                                                                                                                                                                                                                                                                                                                                                                                                                                                                                                                                                                                                                                                                                                                                                                                                                                                                                                                                                                                                                                                                                                                                                                                                                                                                                                                                                                                                                                                                                                                                                                                                                                                                                                                                                                                                                                                                                                                                                                                                                                                                                                                                                                                                                                                                                                                                                                                                                                                                                                                                                                                                                                                                                                                                                            |
| VC_133_26 | JN673056                                                                                                                                                                                                                                                                                                                                                                                                                                                                                                                                                                                                                                                                                                                                                                                                                                                                                                                                                                                                                                                                                                                                                                                                                                                                                                                                                                                                                                                                                                                                                                                                                                                                                                                                                                                                                                                                                                                                                                                                                                                                                                                                                                                                                                                                                                                                                                                                                                                                                                                                                                                                                                                                                                                                                                                                                                                                                                                                                                                                                                                                                                                                                                                                                                                                                                                                                                                                                                                                                                                                                                                                                                                                                                                                                                                                                                                                                                                                                                                                                                                                                                                                                                                                                                                                                                                                                                                                                                                                                                                                                                                                                                                                                                                                                                                                                                                                                                                                                                                                                                                                                                                                                                                                                                                                                                                                                                                                                                                                                                                                                                                                                                                                                                                                                                                                                                                                                                                                                                                                                                                                                                                                                                                                                                                                                                                                                                                                                                                                                                                                                                                                                                                                                                                                                                                                                                                                                                                                                                                                                                                                                                                                                                                                                                                                                                                                                                                                                                                                                                                                                                                                                                                                                                                                                                                                                                                                                                                                                                                                                                                                                                                                                                                                                                                                                                                                                                                                                                                                                                                                                                                                                                                                                                                                                                                                                                                                                                                                                                                                                                                                                                                                                                                                                                                                                                                                                                                                                                                                                                                                                                                                                                                                                                                                                                                                                                                                                                                                                                                                                                                                                                                                                                                                                                                                                                                                                                                                                                                                                                                                                                                                                                                                                                                                                                                                                                                                                                                                                                                                                                                                                                                                                                                                                                                                                                                                                                                                                                                                                                                                                                                                                                                                            |
| VC_133_27 | MG383452                                                                                                                                                                                                                                                                                                                                                                                                                                                                                                                                                                                                                                                                                                                                                                                                                                                                                                                                                                                                                                                                                                                                                                                                                                                                                                                                                                                                                                                                                                                                                                                                                                                                                                                                                                                                                                                                                                                                                                                                                                                                                                                                                                                                                                                                                                                                                                                                                                                                                                                                                                                                                                                                                                                                                                                                                                                                                                                                                                                                                                                                                                                                                                                                                                                                                                                                                                                                                                                                                                                                                                                                                                                                                                                                                                                                                                                                                                                                                                                                                                                                                                                                                                                                                                                                                                                                                                                                                                                                                                                                                                                                                                                                                                                                                                                                                                                                                                                                                                                                                                                                                                                                                                                                                                                                                                                                                                                                                                                                                                                                                                                                                                                                                                                                                                                                                                                                                                                                                                                                                                                                                                                                                                                                                                                                                                                                                                                                                                                                                                                                                                                                                                                                                                                                                                                                                                                                                                                                                                                                                                                                                                                                                                                                                                                                                                                                                                                                                                                                                                                                                                                                                                                                                                                                                                                                                                                                                                                                                                                                                                                                                                                                                                                                                                                                                                                                                                                                                                                                                                                                                                                                                                                                                                                                                                                                                                                                                                                                                                                                                                                                                                                                                                                                                                                                                                                                                                                                                                                                                                                                                                                                                                                                                                                                                                                                                                                                                                                                                                                                                                                                                                                                                                                                                                                                                                                                                                                                                                                                                                                                                                                                                                                                                                                                                                                                                                                                                                                                                                                                                                                                                                                                                                                                                                                                                                                                                                                                                                                                                                                                                                                                                                                                            |
| VC_133_28 | LR811967,LR811969,MW355478                                                                                                                                                                                                                                                                                                                                                                                                                                                                                                                                                                                                                                                                                                                                                                                                                                                                                                                                                                                                                                                                                                                                                                                                                                                                                                                                                                                                                                                                                                                                                                                                                                                                                                                                                                                                                                                                                                                                                                                                                                                                                                                                                                                                                                                                                                                                                                                                                                                                                                                                                                                                                                                                                                                                                                                                                                                                                                                                                                                                                                                                                                                                                                                                                                                                                                                                                                                                                                                                                                                                                                                                                                                                                                                                                                                                                                                                                                                                                                                                                                                                                                                                                                                                                                                                                                                                                                                                                                                                                                                                                                                                                                                                                                                                                                                                                                                                                                                                                                                                                                                                                                                                                                                                                                                                                                                                                                                                                                                                                                                                                                                                                                                                                                                                                                                                                                                                                                                                                                                                                                                                                                                                                                                                                                                                                                                                                                                                                                                                                                                                                                                                                                                                                                                                                                                                                                                                                                                                                                                                                                                                                                                                                                                                                                                                                                                                                                                                                                                                                                                                                                                                                                                                                                                                                                                                                                                                                                                                                                                                                                                                                                                                                                                                                                                                                                                                                                                                                                                                                                                                                                                                                                                                                                                                                                                                                                                                                                                                                                                                                                                                                                                                                                                                                                                                                                                                                                                                                                                                                                                                                                                                                                                                                                                                                                                                                                                                                                                                                                                                                                                                                                                                                                                                                                                                                                                                                                                                                                                                                                                                                                                                                                                                                                                                                                                                                                                                                                                                                                                                                                                                                                                                                                                                                                                                                                                                                                                                                                                                                                                                                                                                                                                          |
| VC_133_29 | MN871475,MN871501                                                                                                                                                                                                                                                                                                                                                                                                                                                                                                                                                                                                                                                                                                                                                                                                                                                                                                                                                                                                                                                                                                                                                                                                                                                                                                                                                                                                                                                                                                                                                                                                                                                                                                                                                                                                                                                                                                                                                                                                                                                                                                                                                                                                                                                                                                                                                                                                                                                                                                                                                                                                                                                                                                                                                                                                                                                                                                                                                                                                                                                                                                                                                                                                                                                                                                                                                                                                                                                                                                                                                                                                                                                                                                                                                                                                                                                                                                                                                                                                                                                                                                                                                                                                                                                                                                                                                                                                                                                                                                                                                                                                                                                                                                                                                                                                                                                                                                                                                                                                                                                                                                                                                                                                                                                                                                                                                                                                                                                                                                                                                                                                                                                                                                                                                                                                                                                                                                                                                                                                                                                                                                                                                                                                                                                                                                                                                                                                                                                                                                                                                                                                                                                                                                                                                                                                                                                                                                                                                                                                                                                                                                                                                                                                                                                                                                                                                                                                                                                                                                                                                                                                                                                                                                                                                                                                                                                                                                                                                                                                                                                                                                                                                                                                                                                                                                                                                                                                                                                                                                                                                                                                                                                                                                                                                                                                                                                                                                                                                                                                                                                                                                                                                                                                                                                                                                                                                                                                                                                                                                                                                                                                                                                                                                                                                                                                                                                                                                                                                                                                                                                                                                                                                                                                                                                                                                                                                                                                                                                                                                                                                                                                                                                                                                                                                                                                                                                                                                                                                                                                                                                                                                                                                                                                                                                                                                                                                                                                                                                                                                                                                                                                                                                                   |
| VC_133_3  | MH370368,MH370371,MT074469                                                                                                                                                                                                                                                                                                                                                                                                                                                                                                                                                                                                                                                                                                                                                                                                                                                                                                                                                                                                                                                                                                                                                                                                                                                                                                                                                                                                                                                                                                                                                                                                                                                                                                                                                                                                                                                                                                                                                                                                                                                                                                                                                                                                                                                                                                                                                                                                                                                                                                                                                                                                                                                                                                                                                                                                                                                                                                                                                                                                                                                                                                                                                                                                                                                                                                                                                                                                                                                                                                                                                                                                                                                                                                                                                                                                                                                                                                                                                                                                                                                                                                                                                                                                                                                                                                                                                                                                                                                                                                                                                                                                                                                                                                                                                                                                                                                                                                                                                                                                                                                                                                                                                                                                                                                                                                                                                                                                                                                                                                                                                                                                                                                                                                                                                                                                                                                                                                                                                                                                                                                                                                                                                                                                                                                                                                                                                                                                                                                                                                                                                                                                                                                                                                                                                                                                                                                                                                                                                                                                                                                                                                                                                                                                                                                                                                                                                                                                                                                                                                                                                                                                                                                                                                                                                                                                                                                                                                                                                                                                                                                                                                                                                                                                                                                                                                                                                                                                                                                                                                                                                                                                                                                                                                                                                                                                                                                                                                                                                                                                                                                                                                                                                                                                                                                                                                                                                                                                                                                                                                                                                                                                                                                                                                                                                                                                                                                                                                                                                                                                                                                                                                                                                                                                                                                                                                                                                                                                                                                                                                                                                                                                                                                                                                                                                                                                                                                                                                                                                                                                                                                                                                                                                                                                                                                                                                                                                                                                                                                                                                                                                                                                                                                          |
| VC_133_30 | KX245012,KY000003                                                                                                                                                                                                                                                                                                                                                                                                                                                                                                                                                                                                                                                                                                                                                                                                                                                                                                                                                                                                                                                                                                                                                                                                                                                                                                                                                                                                                                                                                                                                                                                                                                                                                                                                                                                                                                                                                                                                                                                                                                                                                                                                                                                                                                                                                                                                                                                                                                                                                                                                                                                                                                                                                                                                                                                                                                                                                                                                                                                                                                                                                                                                                                                                                                                                                                                                                                                                                                                                                                                                                                                                                                                                                                                                                                                                                                                                                                                                                                                                                                                                                                                                                                                                                                                                                                                                                                                                                                                                                                                                                                                                                                                                                                                                                                                                                                                                                                                                                                                                                                                                                                                                                                                                                                                                                                                                                                                                                                                                                                                                                                                                                                                                                                                                                                                                                                                                                                                                                                                                                                                                                                                                                                                                                                                                                                                                                                                                                                                                                                                                                                                                                                                                                                                                                                                                                                                                                                                                                                                                                                                                                                                                                                                                                                                                                                                                                                                                                                                                                                                                                                                                                                                                                                                                                                                                                                                                                                                                                                                                                                                                                                                                                                                                                                                                                                                                                                                                                                                                                                                                                                                                                                                                                                                                                                                                                                                                                                                                                                                                                                                                                                                                                                                                                                                                                                                                                                                                                                                                                                                                                                                                                                                                                                                                                                                                                                                                                                                                                                                                                                                                                                                                                                                                                                                                                                                                                                                                                                                                                                                                                                                                                                                                                                                                                                                                                                                                                                                                                                                                                                                                                                                                                                                                                                                                                                                                                                                                                                                                                                                                                                                                                                                                   |
| VC_133_31 | HQ259103,MH370370,MT074476,MW355450,MW355475,MW355477                                                                                                                                                                                                                                                                                                                                                                                                                                                                                                                                                                                                                                                                                                                                                                                                                                                                                                                                                                                                                                                                                                                                                                                                                                                                                                                                                                                                                                                                                                                                                                                                                                                                                                                                                                                                                                                                                                                                                                                                                                                                                                                                                                                                                                                                                                                                                                                                                                                                                                                                                                                                                                                                                                                                                                                                                                                                                                                                                                                                                                                                                                                                                                                                                                                                                                                                                                                                                                                                                                                                                                                                                                                                                                                                                                                                                                                                                                                                                                                                                                                                                                                                                                                                                                                                                                                                                                                                                                                                                                                                                                                                                                                                                                                                                                                                                                                                                                                                                                                                                                                                                                                                                                                                                                                                                                                                                                                                                                                                                                                                                                                                                                                                                                                                                                                                                                                                                                                                                                                                                                                                                                                                                                                                                                                                                                                                                                                                                                                                                                                                                                                                                                                                                                                                                                                                                                                                                                                                                                                                                                                                                                                                                                                                                                                                                                                                                                                                                                                                                                                                                                                                                                                                                                                                                                                                                                                                                                                                                                                                                                                                                                                                                                                                                                                                                                                                                                                                                                                                                                                                                                                                                                                                                                                                                                                                                                                                                                                                                                                                                                                                                                                                                                                                                                                                                                                                                                                                                                                                                                                                                                                                                                                                                                                                                                                                                                                                                                                                                                                                                                                                                                                                                                                                                                                                                                                                                                                                                                                                                                                                                                                                                                                                                                                                                                                                                                                                                                                                                                                                                                                                                                                                                                                                                                                                                                                                                                                                                                                                                                                                                                                                                               |
| VC_133_32 | OM688977                                                                                                                                                                                                                                                                                                                                                                                                                                                                                                                                                                                                                                                                                                                                                                                                                                                                                                                                                                                                                                                                                                                                                                                                                                                                                                                                                                                                                                                                                                                                                                                                                                                                                                                                                                                                                                                                                                                                                                                                                                                                                                                                                                                                                                                                                                                                                                                                                                                                                                                                                                                                                                                                                                                                                                                                                                                                                                                                                                                                                                                                                                                                                                                                                                                                                                                                                                                                                                                                                                                                                                                                                                                                                                                                                                                                                                                                                                                                                                                                                                                                                                                                                                                                                                                                                                                                                                                                                                                                                                                                                                                                                                                                                                                                                                                                                                                                                                                                                                                                                                                                                                                                                                                                                                                                                                                                                                                                                                                                                                                                                                                                                                                                                                                                                                                                                                                                                                                                                                                                                                                                                                                                                                                                                                                                                                                                                                                                                                                                                                                                                                                                                                                                                                                                                                                                                                                                                                                                                                                                                                                                                                                                                                                                                                                                                                                                                                                                                                                                                                                                                                                                                                                                                                                                                                                                                                                                                                                                                                                                                                                                                                                                                                                                                                                                                                                                                                                                                                                                                                                                                                                                                                                                                                                                                                                                                                                                                                                                                                                                                                                                                                                                                                                                                                                                                                                                                                                                                                                                                                                                                                                                                                                                                                                                                                                                                                                                                                                                                                                                                                                                                                                                                                                                                                                                                                                                                                                                                                                                                                                                                                                                                                                                                                                                                                                                                                                                                                                                                                                                                                                                                                                                                                                                                                                                                                                                                                                                                                                                                                                                                                                                                                                                            |
| VC_133_33 | MT499896                                                                                                                                                                                                                                                                                                                                                                                                                                                                                                                                                                                                                                                                                                                                                                                                                                                                                                                                                                                                                                                                                                                                                                                                                                                                                                                                                                                                                                                                                                                                                                                                                                                                                                                                                                                                                                                                                                                                                                                                                                                                                                                                                                                                                                                                                                                                                                                                                                                                                                                                                                                                                                                                                                                                                                                                                                                                                                                                                                                                                                                                                                                                                                                                                                                                                                                                                                                                                                                                                                                                                                                                                                                                                                                                                                                                                                                                                                                                                                                                                                                                                                                                                                                                                                                                                                                                                                                                                                                                                                                                                                                                                                                                                                                                                                                                                                                                                                                                                                                                                                                                                                                                                                                                                                                                                                                                                                                                                                                                                                                                                                                                                                                                                                                                                                                                                                                                                                                                                                                                                                                                                                                                                                                                                                                                                                                                                                                                                                                                                                                                                                                                                                                                                                                                                                                                                                                                                                                                                                                                                                                                                                                                                                                                                                                                                                                                                                                                                                                                                                                                                                                                                                                                                                                                                                                                                                                                                                                                                                                                                                                                                                                                                                                                                                                                                                                                                                                                                                                                                                                                                                                                                                                                                                                                                                                                                                                                                                                                                                                                                                                                                                                                                                                                                                                                                                                                                                                                                                                                                                                                                                                                                                                                                                                                                                                                                                                                                                                                                                                                                                                                                                                                                                                                                                                                                                                                                                                                                                                                                                                                                                                                                                                                                                                                                                                                                                                                                                                                                                                                                                                                                                                                                                                                                                                                                                                                                                                                                                                                                                                                                                                                                                                                            |
| VC_133_34 | KY630163,KY787213,OK283619                                                                                                                                                                                                                                                                                                                                                                                                                                                                                                                                                                                                                                                                                                                                                                                                                                                                                                                                                                                                                                                                                                                                                                                                                                                                                                                                                                                                                                                                                                                                                                                                                                                                                                                                                                                                                                                                                                                                                                                                                                                                                                                                                                                                                                                                                                                                                                                                                                                                                                                                                                                                                                                                                                                                                                                                                                                                                                                                                                                                                                                                                                                                                                                                                                                                                                                                                                                                                                                                                                                                                                                                                                                                                                                                                                                                                                                                                                                                                                                                                                                                                                                                                                                                                                                                                                                                                                                                                                                                                                                                                                                                                                                                                                                                                                                                                                                                                                                                                                                                                                                                                                                                                                                                                                                                                                                                                                                                                                                                                                                                                                                                                                                                                                                                                                                                                                                                                                                                                                                                                                                                                                                                                                                                                                                                                                                                                                                                                                                                                                                                                                                                                                                                                                                                                                                                                                                                                                                                                                                                                                                                                                                                                                                                                                                                                                                                                                                                                                                                                                                                                                                                                                                                                                                                                                                                                                                                                                                                                                                                                                                                                                                                                                                                                                                                                                                                                                                                                                                                                                                                                                                                                                                                                                                                                                                                                                                                                                                                                                                                                                                                                                                                                                                                                                                                                                                                                                                                                                                                                                                                                                                                                                                                                                                                                                                                                                                                                                                                                                                                                                                                                                                                                                                                                                                                                                                                                                                                                                                                                                                                                                                                                                                                                                                                                                                                                                                                                                                                                                                                                                                                                                                                                                                                                                                                                                                                                                                                                                                                                                                                                                                                                                                          |
| VC_133_35 | MZ156570                                                                                                                                                                                                                                                                                                                                                                                                                                                                                                                                                                                                                                                                                                                                                                                                                                                                                                                                                                                                                                                                                                                                                                                                                                                                                                                                                                                                                                                                                                                                                                                                                                                                                                                                                                                                                                                                                                                                                                                                                                                                                                                                                                                                                                                                                                                                                                                                                                                                                                                                                                                                                                                                                                                                                                                                                                                                                                                                                                                                                                                                                                                                                                                                                                                                                                                                                                                                                                                                                                                                                                                                                                                                                                                                                                                                                                                                                                                                                                                                                                                                                                                                                                                                                                                                                                                                                                                                                                                                                                                                                                                                                                                                                                                                                                                                                                                                                                                                                                                                                                                                                                                                                                                                                                                                                                                                                                                                                                                                                                                                                                                                                                                                                                                                                                                                                                                                                                                                                                                                                                                                                                                                                                                                                                                                                                                                                                                                                                                                                                                                                                                                                                                                                                                                                                                                                                                                                                                                                                                                                                                                                                                                                                                                                                                                                                                                                                                                                                                                                                                                                                                                                                                                                                                                                                                                                                                                                                                                                                                                                                                                                                                                                                                                                                                                                                                                                                                                                                                                                                                                                                                                                                                                                                                                                                                                                                                                                                                                                                                                                                                                                                                                                                                                                                                                                                                                                                                                                                                                                                                                                                                                                                                                                                                                                                                                                                                                                                                                                                                                                                                                                                                                                                                                                                                                                                                                                                                                                                                                                                                                                                                                                                                                                                                                                                                                                                                                                                                                                                                                                                                                                                                                                                                                                                                                                                                                                                                                                                                                                                                                                                                                                                                                            |
| VC_133_36 | MN871491,MN871492                                                                                                                                                                                                                                                                                                                                                                                                                                                                                                                                                                                                                                                                                                                                                                                                                                                                                                                                                                                                                                                                                                                                                                                                                                                                                                                                                                                                                                                                                                                                                                                                                                                                                                                                                                                                                                                                                                                                                                                                                                                                                                                                                                                                                                                                                                                                                                                                                                                                                                                                                                                                                                                                                                                                                                                                                                                                                                                                                                                                                                                                                                                                                                                                                                                                                                                                                                                                                                                                                                                                                                                                                                                                                                                                                                                                                                                                                                                                                                                                                                                                                                                                                                                                                                                                                                                                                                                                                                                                                                                                                                                                                                                                                                                                                                                                                                                                                                                                                                                                                                                                                                                                                                                                                                                                                                                                                                                                                                                                                                                                                                                                                                                                                                                                                                                                                                                                                                                                                                                                                                                                                                                                                                                                                                                                                                                                                                                                                                                                                                                                                                                                                                                                                                                                                                                                                                                                                                                                                                                                                                                                                                                                                                                                                                                                                                                                                                                                                                                                                                                                                                                                                                                                                                                                                                                                                                                                                                                                                                                                                                                                                                                                                                                                                                                                                                                                                                                                                                                                                                                                                                                                                                                                                                                                                                                                                                                                                                                                                                                                                                                                                                                                                                                                                                                                                                                                                                                                                                                                                                                                                                                                                                                                                                                                                                                                                                                                                                                                                                                                                                                                                                                                                                                                                                                                                                                                                                                                                                                                                                                                                                                                                                                                                                                                                                                                                                                                                                                                                                                                                                                                                                                                                                                                                                                                                                                                                                                                                                                                                                                                                                                                                                                                   |
| VC_133_37 | MN871493                                                                                                                                                                                                                                                                                                                                                                                                                                                                                                                                                                                                                                                                                                                                                                                                                                                                                                                                                                                                                                                                                                                                                                                                                                                                                                                                                                                                                                                                                                                                                                                                                                                                                                                                                                                                                                                                                                                                                                                                                                                                                                                                                                                                                                                                                                                                                                                                                                                                                                                                                                                                                                                                                                                                                                                                                                                                                                                                                                                                                                                                                                                                                                                                                                                                                                                                                                                                                                                                                                                                                                                                                                                                                                                                                                                                                                                                                                                                                                                                                                                                                                                                                                                                                                                                                                                                                                                                                                                                                                                                                                                                                                                                                                                                                                                                                                                                                                                                                                                                                                                                                                                                                                                                                                                                                                                                                                                                                                                                                                                                                                                                                                                                                                                                                                                                                                                                                                                                                                                                                                                                                                                                                                                                                                                                                                                                                                                                                                                                                                                                                                                                                                                                                                                                                                                                                                                                                                                                                                                                                                                                                                                                                                                                                                                                                                                                                                                                                                                                                                                                                                                                                                                                                                                                                                                                                                                                                                                                                                                                                                                                                                                                                                                                                                                                                                                                                                                                                                                                                                                                                                                                                                                                                                                                                                                                                                                                                                                                                                                                                                                                                                                                                                                                                                                                                                                                                                                                                                                                                                                                                                                                                                                                                                                                                                                                                                                                                                                                                                                                                                                                                                                                                                                                                                                                                                                                                                                                                                                                                                                                                                                                                                                                                                                                                                                                                                                                                                                                                                                                                                                                                                                                                                                                                                                                                                                                                                                                                                                                                                                                                                                                                                                                            |
| VC_133_38 | MN871502                                                                                                                                                                                                                                                                                                                                                                                                                                                                                                                                                                                                                                                                                                                                                                                                                                                                                                                                                                                                                                                                                                                                                                                                                                                                                                                                                                                                                                                                                                                                                                                                                                                                                                                                                                                                                                                                                                                                                                                                                                                                                                                                                                                                                                                                                                                                                                                                                                                                                                                                                                                                                                                                                                                                                                                                                                                                                                                                                                                                                                                                                                                                                                                                                                                                                                                                                                                                                                                                                                                                                                                                                                                                                                                                                                                                                                                                                                                                                                                                                                                                                                                                                                                                                                                                                                                                                                                                                                                                                                                                                                                                                                                                                                                                                                                                                                                                                                                                                                                                                                                                                                                                                                                                                                                                                                                                                                                                                                                                                                                                                                                                                                                                                                                                                                                                                                                                                                                                                                                                                                                                                                                                                                                                                                                                                                                                                                                                                                                                                                                                                                                                                                                                                                                                                                                                                                                                                                                                                                                                                                                                                                                                                                                                                                                                                                                                                                                                                                                                                                                                                                                                                                                                                                                                                                                                                                                                                                                                                                                                                                                                                                                                                                                                                                                                                                                                                                                                                                                                                                                                                                                                                                                                                                                                                                                                                                                                                                                                                                                                                                                                                                                                                                                                                                                                                                                                                                                                                                                                                                                                                                                                                                                                                                                                                                                                                                                                                                                                                                                                                                                                                                                                                                                                                                                                                                                                                                                                                                                                                                                                                                                                                                                                                                                                                                                                                                                                                                                                                                                                                                                                                                                                                                                                                                                                                                                                                                                                                                                                                                                                                                                                                                                                            |
| VC_133_39 | MT074478                                                                                                                                                                                                                                                                                                                                                                                                                                                                                                                                                                                                                                                                                                                                                                                                                                                                                                                                                                                                                                                                                                                                                                                                                                                                                                                                                                                                                                                                                                                                                                                                                                                                                                                                                                                                                                                                                                                                                                                                                                                                                                                                                                                                                                                                                                                                                                                                                                                                                                                                                                                                                                                                                                                                                                                                                                                                                                                                                                                                                                                                                                                                                                                                                                                                                                                                                                                                                                                                                                                                                                                                                                                                                                                                                                                                                                                                                                                                                                                                                                                                                                                                                                                                                                                                                                                                                                                                                                                                                                                                                                                                                                                                                                                                                                                                                                                                                                                                                                                                                                                                                                                                                                                                                                                                                                                                                                                                                                                                                                                                                                                                                                                                                                                                                                                                                                                                                                                                                                                                                                                                                                                                                                                                                                                                                                                                                                                                                                                                                                                                                                                                                                                                                                                                                                                                                                                                                                                                                                                                                                                                                                                                                                                                                                                                                                                                                                                                                                                                                                                                                                                                                                                                                                                                                                                                                                                                                                                                                                                                                                                                                                                                                                                                                                                                                                                                                                                                                                                                                                                                                                                                                                                                                                                                                                                                                                                                                                                                                                                                                                                                                                                                                                                                                                                                                                                                                                                                                                                                                                                                                                                                                                                                                                                                                                                                                                                                                                                                                                                                                                                                                                                                                                                                                                                                                                                                                                                                                                                                                                                                                                                                                                                                                                                                                                                                                                                                                                                                                                                                                                                                                                                                                                                                                                                                                                                                                                                                                                                                                                                                                                                                                                                                            |
| VC_133_4  | LR811968                                                                                                                                                                                                                                                                                                                                                                                                                                                                                                                                                                                                                                                                                                                                                                                                                                                                                                                                                                                                                                                                                                                                                                                                                                                                                                                                                                                                                                                                                                                                                                                                                                                                                                                                                                                                                                                                                                                                                                                                                                                                                                                                                                                                                                                                                                                                                                                                                                                                                                                                                                                                                                                                                                                                                                                                                                                                                                                                                                                                                                                                                                                                                                                                                                                                                                                                                                                                                                                                                                                                                                                                                                                                                                                                                                                                                                                                                                                                                                                                                                                                                                                                                                                                                                                                                                                                                                                                                                                                                                                                                                                                                                                                                                                                                                                                                                                                                                                                                                                                                                                                                                                                                                                                                                                                                                                                                                                                                                                                                                                                                                                                                                                                                                                                                                                                                                                                                                                                                                                                                                                                                                                                                                                                                                                                                                                                                                                                                                                                                                                                                                                                                                                                                                                                                                                                                                                                                                                                                                                                                                                                                                                                                                                                                                                                                                                                                                                                                                                                                                                                                                                                                                                                                                                                                                                                                                                                                                                                                                                                                                                                                                                                                                                                                                                                                                                                                                                                                                                                                                                                                                                                                                                                                                                                                                                                                                                                                                                                                                                                                                                                                                                                                                                                                                                                                                                                                                                                                                                                                                                                                                                                                                                                                                                                                                                                                                                                                                                                                                                                                                                                                                                                                                                                                                                                                                                                                                                                                                                                                                                                                                                                                                                                                                                                                                                                                                                                                                                                                                                                                                                                                                                                                                                                                                                                                                                                                                                                                                                                                                                                                                                                                                                                            |
| VC_133_40 | MH523359                                                                                                                                                                                                                                                                                                                                                                                                                                                                                                                                                                                                                                                                                                                                                                                                                                                                                                                                                                                                                                                                                                                                                                                                                                                                                                                                                                                                                                                                                                                                                                                                                                                                                                                                                                                                                                                                                                                                                                                                                                                                                                                                                                                                                                                                                                                                                                                                                                                                                                                                                                                                                                                                                                                                                                                                                                                                                                                                                                                                                                                                                                                                                                                                                                                                                                                                                                                                                                                                                                                                                                                                                                                                                                                                                                                                                                                                                                                                                                                                                                                                                                                                                                                                                                                                                                                                                                                                                                                                                                                                                                                                                                                                                                                                                                                                                                                                                                                                                                                                                                                                                                                                                                                                                                                                                                                                                                                                                                                                                                                                                                                                                                                                                                                                                                                                                                                                                                                                                                                                                                                                                                                                                                                                                                                                                                                                                                                                                                                                                                                                                                                                                                                                                                                                                                                                                                                                                                                                                                                                                                                                                                                                                                                                                                                                                                                                                                                                                                                                                                                                                                                                                                                                                                                                                                                                                                                                                                                                                                                                                                                                                                                                                                                                                                                                                                                                                                                                                                                                                                                                                                                                                                                                                                                                                                                                                                                                                                                                                                                                                                                                                                                                                                                                                                                                                                                                                                                                                                                                                                                                                                                                                                                                                                                                                                                                                                                                                                                                                                                                                                                                                                                                                                                                                                                                                                                                                                                                                                                                                                                                                                                                                                                                                                                                                                                                                                                                                                                                                                                                                                                                                                                                                                                                                                                                                                                                                                                                                                                                                                                                                                                                                                                                            |
| VC_133_41 | MT074474                                                                                                                                                                                                                                                                                                                                                                                                                                                                                                                                                                                                                                                                                                                                                                                                                                                                                                                                                                                                                                                                                                                                                                                                                                                                                                                                                                                                                                                                                                                                                                                                                                                                                                                                                                                                                                                                                                                                                                                                                                                                                                                                                                                                                                                                                                                                                                                                                                                                                                                                                                                                                                                                                                                                                                                                                                                                                                                                                                                                                                                                                                                                                                                                                                                                                                                                                                                                                                                                                                                                                                                                                                                                                                                                                                                                                                                                                                                                                                                                                                                                                                                                                                                                                                                                                                                                                                                                                                                                                                                                                                                                                                                                                                                                                                                                                                                                                                                                                                                                                                                                                                                                                                                                                                                                                                                                                                                                                                                                                                                                                                                                                                                                                                                                                                                                                                                                                                                                                                                                                                                                                                                                                                                                                                                                                                                                                                                                                                                                                                                                                                                                                                                                                                                                                                                                                                                                                                                                                                                                                                                                                                                                                                                                                                                                                                                                                                                                                                                                                                                                                                                                                                                                                                                                                                                                                                                                                                                                                                                                                                                                                                                                                                                                                                                                                                                                                                                                                                                                                                                                                                                                                                                                                                                                                                                                                                                                                                                                                                                                                                                                                                                                                                                                                                                                                                                                                                                                                                                                                                                                                                                                                                                                                                                                                                                                                                                                                                                                                                                                                                                                                                                                                                                                                                                                                                                                                                                                                                                                                                                                                                                                                                                                                                                                                                                                                                                                                                                                                                                                                                                                                                                                                                                                                                                                                                                                                                                                                                                                                                                                                                                                                                                                            |
| VC_133_42 | MN445184                                                                                                                                                                                                                                                                                                                                                                                                                                                                                                                                                                                                                                                                                                                                                                                                                                                                                                                                                                                                                                                                                                                                                                                                                                                                                                                                                                                                                                                                                                                                                                                                                                                                                                                                                                                                                                                                                                                                                                                                                                                                                                                                                                                                                                                                                                                                                                                                                                                                                                                                                                                                                                                                                                                                                                                                                                                                                                                                                                                                                                                                                                                                                                                                                                                                                                                                                                                                                                                                                                                                                                                                                                                                                                                                                                                                                                                                                                                                                                                                                                                                                                                                                                                                                                                                                                                                                                                                                                                                                                                                                                                                                                                                                                                                                                                                                                                                                                                                                                                                                                                                                                                                                                                                                                                                                                                                                                                                                                                                                                                                                                                                                                                                                                                                                                                                                                                                                                                                                                                                                                                                                                                                                                                                                                                                                                                                                                                                                                                                                                                                                                                                                                                                                                                                                                                                                                                                                                                                                                                                                                                                                                                                                                                                                                                                                                                                                                                                                                                                                                                                                                                                                                                                                                                                                                                                                                                                                                                                                                                                                                                                                                                                                                                                                                                                                                                                                                                                                                                                                                                                                                                                                                                                                                                                                                                                                                                                                                                                                                                                                                                                                                                                                                                                                                                                                                                                                                                                                                                                                                                                                                                                                                                                                                                                                                                                                                                                                                                                                                                                                                                                                                                                                                                                                                                                                                                                                                                                                                                                                                                                                                                                                                                                                                                                                                                                                                                                                                                                                                                                                                                                                                                                                                                                                                                                                                                                                                                                                                                                                                                                                                                                                                                                            |
| VC_133_43 | MN871496,MN871497,MN871498,MN871499                                                                                                                                                                                                                                                                                                                                                                                                                                                                                                                                                                                                                                                                                                                                                                                                                                                                                                                                                                                                                                                                                                                                                                                                                                                                                                                                                                                                                                                                                                                                                                                                                                                                                                                                                                                                                                                                                                                                                                                                                                                                                                                                                                                                                                                                                                                                                                                                                                                                                                                                                                                                                                                                                                                                                                                                                                                                                                                                                                                                                                                                                                                                                                                                                                                                                                                                                                                                                                                                                                                                                                                                                                                                                                                                                                                                                                                                                                                                                                                                                                                                                                                                                                                                                                                                                                                                                                                                                                                                                                                                                                                                                                                                                                                                                                                                                                                                                                                                                                                                                                                                                                                                                                                                                                                                                                                                                                                                                                                                                                                                                                                                                                                                                                                                                                                                                                                                                                                                                                                                                                                                                                                                                                                                                                                                                                                                                                                                                                                                                                                                                                                                                                                                                                                                                                                                                                                                                                                                                                                                                                                                                                                                                                                                                                                                                                                                                                                                                                                                                                                                                                                                                                                                                                                                                                                                                                                                                                                                                                                                                                                                                                                                                                                                                                                                                                                                                                                                                                                                                                                                                                                                                                                                                                                                                                                                                                                                                                                                                                                                                                                                                                                                                                                                                                                                                                                                                                                                                                                                                                                                                                                                                                                                                                                                                                                                                                                                                                                                                                                                                                                                                                                                                                                                                                                                                                                                                                                                                                                                                                                                                                                                                                                                                                                                                                                                                                                                                                                                                                                                                                                                                                                                                                                                                                                                                                                                                                                                                                                                                                                                                                                                                                                 |
| VC_133_44 | MW021754                                                                                                                                                                                                                                                                                                                                                                                                                                                                                                                                                                                                                                                                                                                                                                                                                                                                                                                                                                                                                                                                                                                                                                                                                                                                                                                                                                                                                                                                                                                                                                                                                                                                                                                                                                                                                                                                                                                                                                                                                                                                                                                                                                                                                                                                                                                                                                                                                                                                                                                                                                                                                                                                                                                                                                                                                                                                                                                                                                                                                                                                                                                                                                                                                                                                                                                                                                                                                                                                                                                                                                                                                                                                                                                                                                                                                                                                                                                                                                                                                                                                                                                                                                                                                                                                                                                                                                                                                                                                                                                                                                                                                                                                                                                                                                                                                                                                                                                                                                                                                                                                                                                                                                                                                                                                                                                                                                                                                                                                                                                                                                                                                                                                                                                                                                                                                                                                                                                                                                                                                                                                                                                                                                                                                                                                                                                                                                                                                                                                                                                                                                                                                                                                                                                                                                                                                                                                                                                                                                                                                                                                                                                                                                                                                                                                                                                                                                                                                                                                                                                                                                                                                                                                                                                                                                                                                                                                                                                                                                                                                                                                                                                                                                                                                                                                                                                                                                                                                                                                                                                                                                                                                                                                                                                                                                                                                                                                                                                                                                                                                                                                                                                                                                                                                                                                                                                                                                                                                                                                                                                                                                                                                                                                                                                                                                                                                                                                                                                                                                                                                                                                                                                                                                                                                                                                                                                                                                                                                                                                                                                                                                                                                                                                                                                                                                                                                                                                                                                                                                                                                                                                                                                                                                                                                                                                                                                                                                                                                                                                                                                                                                                                                                                                            |
| VC_133_45 | MT074471,MT074480                                                                                                                                                                                                                                                                                                                                                                                                                                                                                                                                                                                                                                                                                                                                                                                                                                                                                                                                                                                                                                                                                                                                                                                                                                                                                                                                                                                                                                                                                                                                                                                                                                                                                                                                                                                                                                                                                                                                                                                                                                                                                                                                                                                                                                                                                                                                                                                                                                                                                                                                                                                                                                                                                                                                                                                                                                                                                                                                                                                                                                                                                                                                                                                                                                                                                                                                                                                                                                                                                                                                                                                                                                                                                                                                                                                                                                                                                                                                                                                                                                                                                                                                                                                                                                                                                                                                                                                                                                                                                                                                                                                                                                                                                                                                                                                                                                                                                                                                                                                                                                                                                                                                                                                                                                                                                                                                                                                                                                                                                                                                                                                                                                                                                                                                                                                                                                                                                                                                                                                                                                                                                                                                                                                                                                                                                                                                                                                                                                                                                                                                                                                                                                                                                                                                                                                                                                                                                                                                                                                                                                                                                                                                                                                                                                                                                                                                                                                                                                                                                                                                                                                                                                                                                                                                                                                                                                                                                                                                                                                                                                                                                                                                                                                                                                                                                                                                                                                                                                                                                                                                                                                                                                                                                                                                                                                                                                                                                                                                                                                                                                                                                                                                                                                                                                                                                                                                                                                                                                                                                                                                                                                                                                                                                                                                                                                                                                                                                                                                                                                                                                                                                                                                                                                                                                                                                                                                                                                                                                                                                                                                                                                                                                                                                                                                                                                                                                                                                                                                                                                                                                                                                                                                                                                                                                                                                                                                                                                                                                                                                                                                                                                                                                                                   |
| VC_133_46 | MW021760                                                                                                                                                                                                                                                                                                                                                                                                                                                                                                                                                                                                                                                                                                                                                                                                                                                                                                                                                                                                                                                                                                                                                                                                                                                                                                                                                                                                                                                                                                                                                                                                                                                                                                                                                                                                                                                                                                                                                                                                                                                                                                                                                                                                                                                                                                                                                                                                                                                                                                                                                                                                                                                                                                                                                                                                                                                                                                                                                                                                                                                                                                                                                                                                                                                                                                                                                                                                                                                                                                                                                                                                                                                                                                                                                                                                                                                                                                                                                                                                                                                                                                                                                                                                                                                                                                                                                                                                                                                                                                                                                                                                                                                                                                                                                                                                                                                                                                                                                                                                                                                                                                                                                                                                                                                                                                                                                                                                                                                                                                                                                                                                                                                                                                                                                                                                                                                                                                                                                                                                                                                                                                                                                                                                                                                                                                                                                                                                                                                                                                                                                                                                                                                                                                                                                                                                                                                                                                                                                                                                                                                                                                                                                                                                                                                                                                                                                                                                                                                                                                                                                                                                                                                                                                                                                                                                                                                                                                                                                                                                                                                                                                                                                                                                                                                                                                                                                                                                                                                                                                                                                                                                                                                                                                                                                                                                                                                                                                                                                                                                                                                                                                                                                                                                                                                                                                                                                                                                                                                                                                                                                                                                                                                                                                                                                                                                                                                                                                                                                                                                                                                                                                                                                                                                                                                                                                                                                                                                                                                                                                                                                                                                                                                                                                                                                                                                                                                                                                                                                                                                                                                                                                                                                                                                                                                                                                                                                                                                                                                                                                                                                                                                                                                                            |
| VC_133_47 | MT074479                                                                                                                                                                                                                                                                                                                                                                                                                                                                                                                                                                                                                                                                                                                                                                                                                                                                                                                                                                                                                                                                                                                                                                                                                                                                                                                                                                                                                                                                                                                                                                                                                                                                                                                                                                                                                                                                                                                                                                                                                                                                                                                                                                                                                                                                                                                                                                                                                                                                                                                                                                                                                                                                                                                                                                                                                                                                                                                                                                                                                                                                                                                                                                                                                                                                                                                                                                                                                                                                                                                                                                                                                                                                                                                                                                                                                                                                                                                                                                                                                                                                                                                                                                                                                                                                                                                                                                                                                                                                                                                                                                                                                                                                                                                                                                                                                                                                                                                                                                                                                                                                                                                                                                                                                                                                                                                                                                                                                                                                                                                                                                                                                                                                                                                                                                                                                                                                                                                                                                                                                                                                                                                                                                                                                                                                                                                                                                                                                                                                                                                                                                                                                                                                                                                                                                                                                                                                                                                                                                                                                                                                                                                                                                                                                                                                                                                                                                                                                                                                                                                                                                                                                                                                                                                                                                                                                                                                                                                                                                                                                                                                                                                                                                                                                                                                                                                                                                                                                                                                                                                                                                                                                                                                                                                                                                                                                                                                                                                                                                                                                                                                                                                                                                                                                                                                                                                                                                                                                                                                                                                                                                                                                                                                                                                                                                                                                                                                                                                                                                                                                                                                                                                                                                                                                                                                                                                                                                                                                                                                                                                                                                                                                                                                                                                                                                                                                                                                                                                                                                                                                                                                                                                                                                                                                                                                                                                                                                                                                                                                                                                                                                                                                                                                            |
| VC_133_48 | MK972698,MK972699                                                                                                                                                                                                                                                                                                                                                                                                                                                                                                                                                                                                                                                                                                                                                                                                                                                                                                                                                                                                                                                                                                                                                                                                                                                                                                                                                                                                                                                                                                                                                                                                                                                                                                                                                                                                                                                                                                                                                                                                                                                                                                                                                                                                                                                                                                                                                                                                                                                                                                                                                                                                                                                                                                                                                                                                                                                                                                                                                                                                                                                                                                                                                                                                                                                                                                                                                                                                                                                                                                                                                                                                                                                                                                                                                                                                                                                                                                                                                                                                                                                                                                                                                                                                                                                                                                                                                                                                                                                                                                                                                                                                                                                                                                                                                                                                                                                                                                                                                                                                                                                                                                                                                                                                                                                                                                                                                                                                                                                                                                                                                                                                                                                                                                                                                                                                                                                                                                                                                                                                                                                                                                                                                                                                                                                                                                                                                                                                                                                                                                                                                                                                                                                                                                                                                                                                                                                                                                                                                                                                                                                                                                                                                                                                                                                                                                                                                                                                                                                                                                                                                                                                                                                                                                                                                                                                                                                                                                                                                                                                                                                                                                                                                                                                                                                                                                                                                                                                                                                                                                                                                                                                                                                                                                                                                                                                                                                                                                                                                                                                                                                                                                                                                                                                                                                                                                                                                                                                                                                                                                                                                                                                                                                                                                                                                                                                                                                                                                                                                                                                                                                                                                                                                                                                                                                                                                                                                                                                                                                                                                                                                                                                                                                                                                                                                                                                                                                                                                                                                                                                                                                                                                                                                                                                                                                                                                                                                                                                                                                                                                                                                                                                                                                                   |
| VC_133_49 | ON169963                                                                                                                                                                                                                                                                                                                                                                                                                                                                                                                                                                                                                                                                                                                                                                                                                                                                                                                                                                                                                                                                                                                                                                                                                                                                                                                                                                                                                                                                                                                                                                                                                                                                                                                                                                                                                                                                                                                                                                                                                                                                                                                                                                                                                                                                                                                                                                                                                                                                                                                                                                                                                                                                                                                                                                                                                                                                                                                                                                                                                                                                                                                                                                                                                                                                                                                                                                                                                                                                                                                                                                                                                                                                                                                                                                                                                                                                                                                                                                                                                                                                                                                                                                                                                                                                                                                                                                                                                                                                                                                                                                                                                                                                                                                                                                                                                                                                                                                                                                                                                                                                                                                                                                                                                                                                                                                                                                                                                                                                                                                                                                                                                                                                                                                                                                                                                                                                                                                                                                                                                                                                                                                                                                                                                                                                                                                                                                                                                                                                                                                                                                                                                                                                                                                                                                                                                                                                                                                                                                                                                                                                                                                                                                                                                                                                                                                                                                                                                                                                                                                                                                                                                                                                                                                                                                                                                                                                                                                                                                                                                                                                                                                                                                                                                                                                                                                                                                                                                                                                                                                                                                                                                                                                                                                                                                                                                                                                                                                                                                                                                                                                                                                                                                                                                                                                                                                                                                                                                                                                                                                                                                                                                                                                                                                                                                                                                                                                                                                                                                                                                                                                                                                                                                                                                                                                                                                                                                                                                                                                                                                                                                                                                                                                                                                                                                                                                                                                                                                                                                                                                                                                                                                                                                                                                                                                                                                                                                                                                                                                                                                                                                                                                                                                            |
| VC_133_5  | MG748547                                                                                                                                                                                                                                                                                                                                                                                                                                                                                                                                                                                                                                                                                                                                                                                                                                                                                                                                                                                                                                                                                                                                                                                                                                                                                                                                                                                                                                                                                                                                                                                                                                                                                                                                                                                                                                                                                                                                                                                                                                                                                                                                                                                                                                                                                                                                                                                                                                                                                                                                                                                                                                                                                                                                                                                                                                                                                                                                                                                                                                                                                                                                                                                                                                                                                                                                                                                                                                                                                                                                                                                                                                                                                                                                                                                                                                                                                                                                                                                                                                                                                                                                                                                                                                                                                                                                                                                                                                                                                                                                                                                                                                                                                                                                                                                                                                                                                                                                                                                                                                                                                                                                                                                                                                                                                                                                                                                                                                                                                                                                                                                                                                                                                                                                                                                                                                                                                                                                                                                                                                                                                                                                                                                                                                                                                                                                                                                                                                                                                                                                                                                                                                                                                                                                                                                                                                                                                                                                                                                                                                                                                                                                                                                                                                                                                                                                                                                                                                                                                                                                                                                                                                                                                                                                                                                                                                                                                                                                                                                                                                                                                                                                                                                                                                                                                                                                                                                                                                                                                                                                                                                                                                                                                                                                                                                                                                                                                                                                                                                                                                                                                                                                                                                                                                                                                                                                                                                                                                                                                                                                                                                                                                                                                                                                                                                                                                                                                                                                                                                                                                                                                                                                                                                                                                                                                                                                                                                                                                                                                                                                                                                                                                                                                                                                                                                                                                                                                                                                                                                                                                                                                                                                                                                                                                                                                                                                                                                                                                                                                                                                                                                                                                                                            |
| VC_133_50 | ON169961                                                                                                                                                                                                                                                                                                                                                                                                                                                                                                                                                                                                                                                                                                                                                                                                                                                                                                                                                                                                                                                                                                                                                                                                                                                                                                                                                                                                                                                                                                                                                                                                                                                                                                                                                                                                                                                                                                                                                                                                                                                                                                                                                                                                                                                                                                                                                                                                                                                                                                                                                                                                                                                                                                                                                                                                                                                                                                                                                                                                                                                                                                                                                                                                                                                                                                                                                                                                                                                                                                                                                                                                                                                                                                                                                                                                                                                                                                                                                                                                                                                                                                                                                                                                                                                                                                                                                                                                                                                                                                                                                                                                                                                                                                                                                                                                                                                                                                                                                                                                                                                                                                                                                                                                                                                                                                                                                                                                                                                                                                                                                                                                                                                                                                                                                                                                                                                                                                                                                                                                                                                                                                                                                                                                                                                                                                                                                                                                                                                                                                                                                                                                                                                                                                                                                                                                                                                                                                                                                                                                                                                                                                                                                                                                                                                                                                                                                                                                                                                                                                                                                                                                                                                                                                                                                                                                                                                                                                                                                                                                                                                                                                                                                                                                                                                                                                                                                                                                                                                                                                                                                                                                                                                                                                                                                                                                                                                                                                                                                                                                                                                                                                                                                                                                                                                                                                                                                                                                                                                                                                                                                                                                                                                                                                                                                                                                                                                                                                                                                                                                                                                                                                                                                                                                                                                                                                                                                                                                                                                                                                                                                                                                                                                                                                                                                                                                                                                                                                                                                                                                                                                                                                                                                                                                                                                                                                                                                                                                                                                                                                                                                                                                                                                                            |
| VC_133_51 | ON169962                                                                                                                                                                                                                                                                                                                                                                                                                                                                                                                                                                                                                                                                                                                                                                                                                                                                                                                                                                                                                                                                                                                                                                                                                                                                                                                                                                                                                                                                                                                                                                                                                                                                                                                                                                                                                                                                                                                                                                                                                                                                                                                                                                                                                                                                                                                                                                                                                                                                                                                                                                                                                                                                                                                                                                                                                                                                                                                                                                                                                                                                                                                                                                                                                                                                                                                                                                                                                                                                                                                                                                                                                                                                                                                                                                                                                                                                                                                                                                                                                                                                                                                                                                                                                                                                                                                                                                                                                                                                                                                                                                                                                                                                                                                                                                                                                                                                                                                                                                                                                                                                                                                                                                                                                                                                                                                                                                                                                                                                                                                                                                                                                                                                                                                                                                                                                                                                                                                                                                                                                                                                                                                                                                                                                                                                                                                                                                                                                                                                                                                                                                                                                                                                                                                                                                                                                                                                                                                                                                                                                                                                                                                                                                                                                                                                                                                                                                                                                                                                                                                                                                                                                                                                                                                                                                                                                                                                                                                                                                                                                                                                                                                                                                                                                                                                                                                                                                                                                                                                                                                                                                                                                                                                                                                                                                                                                                                                                                                                                                                                                                                                                                                                                                                                                                                                                                                                                                                                                                                                                                                                                                                                                                                                                                                                                                                                                                                                                                                                                                                                                                                                                                                                                                                                                                                                                                                                                                                                                                                                                                                                                                                                                                                                                                                                                                                                                                                                                                                                                                                                                                                                                                                                                                                                                                                                                                                                                                                                                                                                                                                                                                                                                                                                            |
| VC_133_6  | MH791405                                                                                                                                                                                                                                                                                                                                                                                                                                                                                                                                                                                                                                                                                                                                                                                                                                                                                                                                                                                                                                                                                                                                                                                                                                                                                                                                                                                                                                                                                                                                                                                                                                                                                                                                                                                                                                                                                                                                                                                                                                                                                                                                                                                                                                                                                                                                                                                                                                                                                                                                                                                                                                                                                                                                                                                                                                                                                                                                                                                                                                                                                                                                                                                                                                                                                                                                                                                                                                                                                                                                                                                                                                                                                                                                                                                                                                                                                                                                                                                                                                                                                                                                                                                                                                                                                                                                                                                                                                                                                                                                                                                                                                                                                                                                                                                                                                                                                                                                                                                                                                                                                                                                                                                                                                                                                                                                                                                                                                                                                                                                                                                                                                                                                                                                                                                                                                                                                                                                                                                                                                                                                                                                                                                                                                                                                                                                                                                                                                                                                                                                                                                                                                                                                                                                                                                                                                                                                                                                                                                                                                                                                                                                                                                                                                                                                                                                                                                                                                                                                                                                                                                                                                                                                                                                                                                                                                                                                                                                                                                                                                                                                                                                                                                                                                                                                                                                                                                                                                                                                                                                                                                                                                                                                                                                                                                                                                                                                                                                                                                                                                                                                                                                                                                                                                                                                                                                                                                                                                                                                                                                                                                                                                                                                                                                                                                                                                                                                                                                                                                                                                                                                                                                                                                                                                                                                                                                                                                                                                                                                                                                                                                                                                                                                                                                                                                                                                                                                                                                                                                                                                                                                                                                                                                                                                                                                                                                                                                                                                                                                                                                                                                                                                                                            |
| VC_133_7  | MT974436                                                                                                                                                                                                                                                                                                                                                                                                                                                                                                                                                                                                                                                                                                                                                                                                                                                                                                                                                                                                                                                                                                                                                                                                                                                                                                                                                                                                                                                                                                                                                                                                                                                                                                                                                                                                                                                                                                                                                                                                                                                                                                                                                                                                                                                                                                                                                                                                                                                                                                                                                                                                                                                                                                                                                                                                                                                                                                                                                                                                                                                                                                                                                                                                                                                                                                                                                                                                                                                                                                                                                                                                                                                                                                                                                                                                                                                                                                                                                                                                                                                                                                                                                                                                                                                                                                                                                                                                                                                                                                                                                                                                                                                                                                                                                                                                                                                                                                                                                                                                                                                                                                                                                                                                                                                                                                                                                                                                                                                                                                                                                                                                                                                                                                                                                                                                                                                                                                                                                                                                                                                                                                                                                                                                                                                                                                                                                                                                                                                                                                                                                                                                                                                                                                                                                                                                                                                                                                                                                                                                                                                                                                                                                                                                                                                                                                                                                                                                                                                                                                                                                                                                                                                                                                                                                                                                                                                                                                                                                                                                                                                                                                                                                                                                                                                                                                                                                                                                                                                                                                                                                                                                                                                                                                                                                                                                                                                                                                                                                                                                                                                                                                                                                                                                                                                                                                                                                                                                                                                                                                                                                                                                                                                                                                                                                                                                                                                                                                                                                                                                                                                                                                                                                                                                                                                                                                                                                                                                                                                                                                                                                                                                                                                                                                                                                                                                                                                                                                                                                                                                                                                                                                                                                                                                                                                                                                                                                                                                                                                                                                                                                                                                                                                                            |
| VC_133_8  | MT074477                                                                                                                                                                                                                                                                                                                                                                                                                                                                                                                                                                                                                                                                                                                                                                                                                                                                                                                                                                                                                                                                                                                                                                                                                                                                                                                                                                                                                                                                                                                                                                                                                                                                                                                                                                                                                                                                                                                                                                                                                                                                                                                                                                                                                                                                                                                                                                                                                                                                                                                                                                                                                                                                                                                                                                                                                                                                                                                                                                                                                                                                                                                                                                                                                                                                                                                                                                                                                                                                                                                                                                                                                                                                                                                                                                                                                                                                                                                                                                                                                                                                                                                                                                                                                                                                                                                                                                                                                                                                                                                                                                                                                                                                                                                                                                                                                                                                                                                                                                                                                                                                                                                                                                                                                                                                                                                                                                                                                                                                                                                                                                                                                                                                                                                                                                                                                                                                                                                                                                                                                                                                                                                                                                                                                                                                                                                                                                                                                                                                                                                                                                                                                                                                                                                                                                                                                                                                                                                                                                                                                                                                                                                                                                                                                                                                                                                                                                                                                                                                                                                                                                                                                                                                                                                                                                                                                                                                                                                                                                                                                                                                                                                                                                                                                                                                                                                                                                                                                                                                                                                                                                                                                                                                                                                                                                                                                                                                                                                                                                                                                                                                                                                                                                                                                                                                                                                                                                                                                                                                                                                                                                                                                                                                                                                                                                                                                                                                                                                                                                                                                                                                                                                                                                                                                                                                                                                                                                                                                                                                                                                                                                                                                                                                                                                                                                                                                                                                                                                                                                                                                                                                                                                                                                                                                                                                                                                                                                                                                                                                                                                                                                                                                                                                            |
| VC_133_9  | KP797973,KX171211,MN384979                                                                                                                                                                                                                                                                                                                                                                                                                                                                                                                                                                                                                                                                                                                                                                                                                                                                                                                                                                                                                                                                                                                                                                                                                                                                                                                                                                                                                                                                                                                                                                                                                                                                                                                                                                                                                                                                                                                                                                                                                                                                                                                                                                                                                                                                                                                                                                                                                                                                                                                                                                                                                                                                                                                                                                                                                                                                                                                                                                                                                                                                                                                                                                                                                                                                                                                                                                                                                                                                                                                                                                                                                                                                                                                                                                                                                                                                                                                                                                                                                                                                                                                                                                                                                                                                                                                                                                                                                                                                                                                                                                                                                                                                                                                                                                                                                                                                                                                                                                                                                                                                                                                                                                                                                                                                                                                                                                                                                                                                                                                                                                                                                                                                                                                                                                                                                                                                                                                                                                                                                                                                                                                                                                                                                                                                                                                                                                                                                                                                                                                                                                                                                                                                                                                                                                                                                                                                                                                                                                                                                                                                                                                                                                                                                                                                                                                                                                                                                                                                                                                                                                                                                                                                                                                                                                                                                                                                                                                                                                                                                                                                                                                                                                                                                                                                                                                                                                                                                                                                                                                                                                                                                                                                                                                                                                                                                                                                                                                                                                                                                                                                                                                                                                                                                                                                                                                                                                                                                                                                                                                                                                                                                                                                                                                                                                                                                                                                                                                                                                                                                                                                                                                                                                                                                                                                                                                                                                                                                                                                                                                                                                                                                                                                                                                                                                                                                                                                                                                                                                                                                                                                                                                                                                                                                                                                                                                                                                                                                                                                                                                                                                                                                                                          |
| VC_1330_0 | MG945788,MG945795                                                                                                                                                                                                                                                                                                                                                                                                                                                                                                                                                                                                                                                                                                                                                                                                                                                                                                                                                                                                                                                                                                                                                                                                                                                                                                                                                                                                                                                                                                                                                                                                                                                                                                                                                                                                                                                                                                                                                                                                                                                                                                                                                                                                                                                                                                                                                                                                                                                                                                                                                                                                                                                                                                                                                                                                                                                                                                                                                                                                                                                                                                                                                                                                                                                                                                                                                                                                                                                                                                                                                                                                                                                                                                                                                                                                                                                                                                                                                                                                                                                                                                                                                                                                                                                                                                                                                                                                                                                                                                                                                                                                                                                                                                                                                                                                                                                                                                                                                                                                                                                                                                                                                                                                                                                                                                                                                                                                                                                                                                                                                                                                                                                                                                                                                                                                                                                                                                                                                                                                                                                                                                                                                                                                                                                                                                                                                                                                                                                                                                                                                                                                                                                                                                                                                                                                                                                                                                                                                                                                                                                                                                                                                                                                                                                                                                                                                                                                                                                                                                                                                                                                                                                                                                                                                                                                                                                                                                                                                                                                                                                                                                                                                                                                                                                                                                                                                                                                                                                                                                                                                                                                                                                                                                                                                                                                                                                                                                                                                                                                                                                                                                                                                                                                                                                                                                                                                                                                                                                                                                                                                                                                                                                                                                                                                                                                                                                                                                                                                                                                                                                                                                                                                                                                                                                                                                                                                                                                                                                                                                                                                                                                                                                                                                                                                                                                                                                                                                                                                                                                                                                                                                                                                                                                                                                                                                                                                                                                                                                                                                                                                                                                                                                                   |
| VC_1331_0 | MG945798,MK765653,MT135350,MT135457                                                                                                                                                                                                                                                                                                                                                                                                                                                                                                                                                                                                                                                                                                                                                                                                                                                                                                                                                                                                                                                                                                                                                                                                                                                                                                                                                                                                                                                                                                                                                                                                                                                                                                                                                                                                                                                                                                                                                                                                                                                                                                                                                                                                                                                                                                                                                                                                                                                                                                                                                                                                                                                                                                                                                                                                                                                                                                                                                                                                                                                                                                                                                                                                                                                                                                                                                                                                                                                                                                                                                                                                                                                                                                                                                                                                                                                                                                                                                                                                                                                                                                                                                                                                                                                                                                                                                                                                                                                                                                                                                                                                                                                                                                                                                                                                                                                                                                                                                                                                                                                                                                                                                                                                                                                                                                                                                                                                                                                                                                                                                                                                                                                                                                                                                                                                                                                                                                                                                                                                                                                                                                                                                                                                                                                                                                                                                                                                                                                                                                                                                                                                                                                                                                                                                                                                                                                                                                                                                                                                                                                                                                                                                                                                                                                                                                                                                                                                                                                                                                                                                                                                                                                                                                                                                                                                                                                                                                                                                                                                                                                                                                                                                                                                                                                                                                                                                                                                                                                                                                                                                                                                                                                                                                                                                                                                                                                                                                                                                                                                                                                                                                                                                                                                                                                                                                                                                                                                                                                                                                                                                                                                                                                                                                                                                                                                                                                                                                                                                                                                                                                                                                                                                                                                                                                                                                                                                                                                                                                                                                                                                                                                                                                                                                                                                                                                                                                                                                                                                                                                                                                                                                                                                                                                                                                                                                                                                                                                                                                                                                                                                                                                                                                 |
| VC_1332_0 | OM869639,OM869679                                                                                                                                                                                                                                                                                                                                                                                                                                                                                                                                                                                                                                                                                                                                                                                                                                                                                                                                                                                                                                                                                                                                                                                                                                                                                                                                                                                                                                                                                                                                                                                                                                                                                                                                                                                                                                                                                                                                                                                                                                                                                                                                                                                                                                                                                                                                                                                                                                                                                                                                                                                                                                                                                                                                                                                                                                                                                                                                                                                                                                                                                                                                                                                                                                                                                                                                                                                                                                                                                                                                                                                                                                                                                                                                                                                                                                                                                                                                                                                                                                                                                                                                                                                                                                                                                                                                                                                                                                                                                                                                                                                                                                                                                                                                                                                                                                                                                                                                                                                                                                                                                                                                                                                                                                                                                                                                                                                                                                                                                                                                                                                                                                                                                                                                                                                                                                                                                                                                                                                                                                                                                                                                                                                                                                                                                                                                                                                                                                                                                                                                                                                                                                                                                                                                                                                                                                                                                                                                                                                                                                                                                                                                                                                                                                                                                                                                                                                                                                                                                                                                                                                                                                                                                                                                                                                                                                                                                                                                                                                                                                                                                                                                                                                                                                                                                                                                                                                                                                                                                                                                                                                                                                                                                                                                                                                                                                                                                                                                                                                                                                                                                                                                                                                                                                                                                                                                                                                                                                                                                                                                                                                                                                                                                                                                                                                                                                                                                                                                                                                                                                                                                                                                                                                                                                                                                                                                                                                                                                                                                                                                                                                                                                                                                                                                                                                                                                                                                                                                                                                                                                                                                                                                                                                                                                                                                                                                                                                                                                                                                                                                                                                                                                                                   |
| VC_1333_0 | MG945808,MG945849                                                                                                                                                                                                                                                                                                                                                                                                                                                                                                                                                                                                                                                                                                                                                                                                                                                                                                                                                                                                                                                                                                                                                                                                                                                                                                                                                                                                                                                                                                                                                                                                                                                                                                                                                                                                                                                                                                                                                                                                                                                                                                                                                                                                                                                                                                                                                                                                                                                                                                                                                                                                                                                                                                                                                                                                                                                                                                                                                                                                                                                                                                                                                                                                                                                                                                                                                                                                                                                                                                                                                                                                                                                                                                                                                                                                                                                                                                                                                                                                                                                                                                                                                                                                                                                                                                                                                                                                                                                                                                                                                                                                                                                                                                                                                                                                                                                                                                                                                                                                                                                                                                                                                                                                                                                                                                                                                                                                                                                                                                                                                                                                                                                                                                                                                                                                                                                                                                                                                                                                                                                                                                                                                                                                                                                                                                                                                                                                                                                                                                                                                                                                                                                                                                                                                                                                                                                                                                                                                                                                                                                                                                                                                                                                                                                                                                                                                                                                                                                                                                                                                                                                                                                                                                                                                                                                                                                                                                                                                                                                                                                                                                                                                                                                                                                                                                                                                                                                                                                                                                                                                                                                                                                                                                                                                                                                                                                                                                                                                                                                                                                                                                                                                                                                                                                                                                                                                                                                                                                                                                                                                                                                                                                                                                                                                                                                                                                                                                                                                                                                                                                                                                                                                                                                                                                                                                                                                                                                                                                                                                                                                                                                                                                                                                                                                                                                                                                                                                                                                                                                                                                                                                                                                                                                                                                                                                                                                                                                                                                                                                                                                                                                                                                                   |
| VC_1334_0 | MG945821                                                                                                                                                                                                                                                                                                                                                                                                                                                                                                                                                                                                                                                                                                                                                                                                                                                                                                                                                                                                                                                                                                                                                                                                                                                                                                                                                                                                                                                                                                                                                                                                                                                                                                                                                                                                                                                                                                                                                                                                                                                                                                                                                                                                                                                                                                                                                                                                                                                                                                                                                                                                                                                                                                                                                                                                                                                                                                                                                                                                                                                                                                                                                                                                                                                                                                                                                                                                                                                                                                                                                                                                                                                                                                                                                                                                                                                                                                                                                                                                                                                                                                                                                                                                                                                                                                                                                                                                                                                                                                                                                                                                                                                                                                                                                                                                                                                                                                                                                                                                                                                                                                                                                                                                                                                                                                                                                                                                                                                                                                                                                                                                                                                                                                                                                                                                                                                                                                                                                                                                                                                                                                                                                                                                                                                                                                                                                                                                                                                                                                                                                                                                                                                                                                                                                                                                                                                                                                                                                                                                                                                                                                                                                                                                                                                                                                                                                                                                                                                                                                                                                                                                                                                                                                                                                                                                                                                                                                                                                                                                                                                                                                                                                                                                                                                                                                                                                                                                                                                                                                                                                                                                                                                                                                                                                                                                                                                                                                                                                                                                                                                                                                                                                                                                                                                                                                                                                                                                                                                                                                                                                                                                                                                                                                                                                                                                                                                                                                                                                                                                                                                                                                                                                                                                                                                                                                                                                                                                                                                                                                                                                                                                                                                                                                                                                                                                                                                                                                                                                                                                                                                                                                                                                                                                                                                                                                                                                                                                                                                                                                                                                                                                                                                                            |
| VC_1335_0 | MG945831,MT135370,MT135373,MT135418,MT135430,MT135455,MT135459                                                                                                                                                                                                                                                                                                                                                                                                                                                                                                                                                                                                                                                                                                                                                                                                                                                                                                                                                                                                                                                                                                                                                                                                                                                                                                                                                                                                                                                                                                                                                                                                                                                                                                                                                                                                                                                                                                                                                                                                                                                                                                                                                                                                                                                                                                                                                                                                                                                                                                                                                                                                                                                                                                                                                                                                                                                                                                                                                                                                                                                                                                                                                                                                                                                                                                                                                                                                                                                                                                                                                                                                                                                                                                                                                                                                                                                                                                                                                                                                                                                                                                                                                                                                                                                                                                                                                                                                                                                                                                                                                                                                                                                                                                                                                                                                                                                                                                                                                                                                                                                                                                                                                                                                                                                                                                                                                                                                                                                                                                                                                                                                                                                                                                                                                                                                                                                                                                                                                                                                                                                                                                                                                                                                                                                                                                                                                                                                                                                                                                                                                                                                                                                                                                                                                                                                                                                                                                                                                                                                                                                                                                                                                                                                                                                                                                                                                                                                                                                                                                                                                                                                                                                                                                                                                                                                                                                                                                                                                                                                                                                                                                                                                                                                                                                                                                                                                                                                                                                                                                                                                                                                                                                                                                                                                                                                                                                                                                                                                                                                                                                                                                                                                                                                                                                                                                                                                                                                                                                                                                                                                                                                                                                                                                                                                                                                                                                                                                                                                                                                                                                                                                                                                                                                                                                                                                                                                                                                                                                                                                                                                                                                                                                                                                                                                                                                                                                                                                                                                                                                                                                                                                                                                                                                                                                                                                                                                                                                                                                                                                                                                                                                                      |
| VC_1336_0 | OP549864,OP549865,OP549866                                                                                                                                                                                                                                                                                                                                                                                                                                                                                                                                                                                                                                                                                                                                                                                                                                                                                                                                                                                                                                                                                                                                                                                                                                                                                                                                                                                                                                                                                                                                                                                                                                                                                                                                                                                                                                                                                                                                                                                                                                                                                                                                                                                                                                                                                                                                                                                                                                                                                                                                                                                                                                                                                                                                                                                                                                                                                                                                                                                                                                                                                                                                                                                                                                                                                                                                                                                                                                                                                                                                                                                                                                                                                                                                                                                                                                                                                                                                                                                                                                                                                                                                                                                                                                                                                                                                                                                                                                                                                                                                                                                                                                                                                                                                                                                                                                                                                                                                                                                                                                                                                                                                                                                                                                                                                                                                                                                                                                                                                                                                                                                                                                                                                                                                                                                                                                                                                                                                                                                                                                                                                                                                                                                                                                                                                                                                                                                                                                                                                                                                                                                                                                                                                                                                                                                                                                                                                                                                                                                                                                                                                                                                                                                                                                                                                                                                                                                                                                                                                                                                                                                                                                                                                                                                                                                                                                                                                                                                                                                                                                                                                                                                                                                                                                                                                                                                                                                                                                                                                                                                                                                                                                                                                                                                                                                                                                                                                                                                                                                                                                                                                                                                                                                                                                                                                                                                                                                                                                                                                                                                                                                                                                                                                                                                                                                                                                                                                                                                                                                                                                                                                                                                                                                                                                                                                                                                                                                                                                                                                                                                                                                                                                                                                                                                                                                                                                                                                                                                                                                                                                                                                                                                                                                                                                                                                                                                                                                                                                                                                                                                                                                                                                                          |
| VC_1337_0 | MG945832,MT135421                                                                                                                                                                                                                                                                                                                                                                                                                                                                                                                                                                                                                                                                                                                                                                                                                                                                                                                                                                                                                                                                                                                                                                                                                                                                                                                                                                                                                                                                                                                                                                                                                                                                                                                                                                                                                                                                                                                                                                                                                                                                                                                                                                                                                                                                                                                                                                                                                                                                                                                                                                                                                                                                                                                                                                                                                                                                                                                                                                                                                                                                                                                                                                                                                                                                                                                                                                                                                                                                                                                                                                                                                                                                                                                                                                                                                                                                                                                                                                                                                                                                                                                                                                                                                                                                                                                                                                                                                                                                                                                                                                                                                                                                                                                                                                                                                                                                                                                                                                                                                                                                                                                                                                                                                                                                                                                                                                                                                                                                                                                                                                                                                                                                                                                                                                                                                                                                                                                                                                                                                                                                                                                                                                                                                                                                                                                                                                                                                                                                                                                                                                                                                                                                                                                                                                                                                                                                                                                                                                                                                                                                                                                                                                                                                                                                                                                                                                                                                                                                                                                                                                                                                                                                                                                                                                                                                                                                                                                                                                                                                                                                                                                                                                                                                                                                                                                                                                                                                                                                                                                                                                                                                                                                                                                                                                                                                                                                                                                                                                                                                                                                                                                                                                                                                                                                                                                                                                                                                                                                                                                                                                                                                                                                                                                                                                                                                                                                                                                                                                                                                                                                                                                                                                                                                                                                                                                                                                                                                                                                                                                                                                                                                                                                                                                                                                                                                                                                                                                                                                                                                                                                                                                                                                                                                                                                                                                                                                                                                                                                                                                                                                                                                                                                   |
| VC_1338_0 | MG945839,MH572484,MZ364252,MZ364293                                                                                                                                                                                                                                                                                                                                                                                                                                                                                                                                                                                                                                                                                                                                                                                                                                                                                                                                                                                                                                                                                                                                                                                                                                                                                                                                                                                                                                                                                                                                                                                                                                                                                                                                                                                                                                                                                                                                                                                                                                                                                                                                                                                                                                                                                                                                                                                                                                                                                                                                                                                                                                                                                                                                                                                                                                                                                                                                                                                                                                                                                                                                                                                                                                                                                                                                                                                                                                                                                                                                                                                                                                                                                                                                                                                                                                                                                                                                                                                                                                                                                                                                                                                                                                                                                                                                                                                                                                                                                                                                                                                                                                                                                                                                                                                                                                                                                                                                                                                                                                                                                                                                                                                                                                                                                                                                                                                                                                                                                                                                                                                                                                                                                                                                                                                                                                                                                                                                                                                                                                                                                                                                                                                                                                                                                                                                                                                                                                                                                                                                                                                                                                                                                                                                                                                                                                                                                                                                                                                                                                                                                                                                                                                                                                                                                                                                                                                                                                                                                                                                                                                                                                                                                                                                                                                                                                                                                                                                                                                                                                                                                                                                                                                                                                                                                                                                                                                                                                                                                                                                                                                                                                                                                                                                                                                                                                                                                                                                                                                                                                                                                                                                                                                                                                                                                                                                                                                                                                                                                                                                                                                                                                                                                                                                                                                                                                                                                                                                                                                                                                                                                                                                                                                                                                                                                                                                                                                                                                                                                                                                                                                                                                                                                                                                                                                                                                                                                                                                                                                                                                                                                                                                                                                                                                                                                                                                                                                                                                                                                                                                                                                                                                                 |
| VC_1339_0 | MG945842,MH992159,MH992175,MH992200,MK249218,MK249229,MK249233                                                                                                                                                                                                                                                                                                                                                                                                                                                                                                                                                                                                                                                                                                                                                                                                                                                                                                                                                                                                                                                                                                                                                                                                                                                                                                                                                                                                                                                                                                                                                                                                                                                                                                                                                                                                                                                                                                                                                                                                                                                                                                                                                                                                                                                                                                                                                                                                                                                                                                                                                                                                                                                                                                                                                                                                                                                                                                                                                                                                                                                                                                                                                                                                                                                                                                                                                                                                                                                                                                                                                                                                                                                                                                                                                                                                                                                                                                                                                                                                                                                                                                                                                                                                                                                                                                                                                                                                                                                                                                                                                                                                                                                                                                                                                                                                                                                                                                                                                                                                                                                                                                                                                                                                                                                                                                                                                                                                                                                                                                                                                                                                                                                                                                                                                                                                                                                                                                                                                                                                                                                                                                                                                                                                                                                                                                                                                                                                                                                                                                                                                                                                                                                                                                                                                                                                                                                                                                                                                                                                                                                                                                                                                                                                                                                                                                                                                                                                                                                                                                                                                                                                                                                                                                                                                                                                                                                                                                                                                                                                                                                                                                                                                                                                                                                                                                                                                                                                                                                                                                                                                                                                                                                                                                                                                                                                                                                                                                                                                                                                                                                                                                                                                                                                                                                                                                                                                                                                                                                                                                                                                                                                                                                                                                                                                                                                                                                                                                                                                                                                                                                                                                                                                                                                                                                                                                                                                                                                                                                                                                                                                                                                                                                                                                                                                                                                                                                                                                                                                                                                                                                                                                                                                                                                                                                                                                                                                                                                                                                                                                                                                                                                                      |
| VC_134_0  | MH363700,MK795384,OK428602                                                                                                                                                                                                                                                                                                                                                                                                                                                                                                                                                                                                                                                                                                                                                                                                                                                                                                                                                                                                                                                                                                                                                                                                                                                                                                                                                                                                                                                                                                                                                                                                                                                                                                                                                                                                                                                                                                                                                                                                                                                                                                                                                                                                                                                                                                                                                                                                                                                                                                                                                                                                                                                                                                                                                                                                                                                                                                                                                                                                                                                                                                                                                                                                                                                                                                                                                                                                                                                                                                                                                                                                                                                                                                                                                                                                                                                                                                                                                                                                                                                                                                                                                                                                                                                                                                                                                                                                                                                                                                                                                                                                                                                                                                                                                                                                                                                                                                                                                                                                                                                                                                                                                                                                                                                                                                                                                                                                                                                                                                                                                                                                                                                                                                                                                                                                                                                                                                                                                                                                                                                                                                                                                                                                                                                                                                                                                                                                                                                                                                                                                                                                                                                                                                                                                                                                                                                                                                                                                                                                                                                                                                                                                                                                                                                                                                                                                                                                                                                                                                                                                                                                                                                                                                                                                                                                                                                                                                                                                                                                                                                                                                                                                                                                                                                                                                                                                                                                                                                                                                                                                                                                                                                                                                                                                                                                                                                                                                                                                                                                                                                                                                                                                                                                                                                                                                                                                                                                                                                                                                                                                                                                                                                                                                                                                                                                                                                                                                                                                                                                                                                                                                                                                                                                                                                                                                                                                                                                                                                                                                                                                                                                                                                                                                                                                                                                                                                                                                                                                                                                                                                                                                                                                                                                                                                                                                                                                                                                                                                                                                                                                                                                                                                          |
| VC_1340_0 | MG945850,MT135335,MT135340,MT135376,MT135393                                                                                                                                                                                                                                                                                                                                                                                                                                                                                                                                                                                                                                                                                                                                                                                                                                                                                                                                                                                                                                                                                                                                                                                                                                                                                                                                                                                                                                                                                                                                                                                                                                                                                                                                                                                                                                                                                                                                                                                                                                                                                                                                                                                                                                                                                                                                                                                                                                                                                                                                                                                                                                                                                                                                                                                                                                                                                                                                                                                                                                                                                                                                                                                                                                                                                                                                                                                                                                                                                                                                                                                                                                                                                                                                                                                                                                                                                                                                                                                                                                                                                                                                                                                                                                                                                                                                                                                                                                                                                                                                                                                                                                                                                                                                                                                                                                                                                                                                                                                                                                                                                                                                                                                                                                                                                                                                                                                                                                                                                                                                                                                                                                                                                                                                                                                                                                                                                                                                                                                                                                                                                                                                                                                                                                                                                                                                                                                                                                                                                                                                                                                                                                                                                                                                                                                                                                                                                                                                                                                                                                                                                                                                                                                                                                                                                                                                                                                                                                                                                                                                                                                                                                                                                                                                                                                                                                                                                                                                                                                                                                                                                                                                                                                                                                                                                                                                                                                                                                                                                                                                                                                                                                                                                                                                                                                                                                                                                                                                                                                                                                                                                                                                                                                                                                                                                                                                                                                                                                                                                                                                                                                                                                                                                                                                                                                                                                                                                                                                                                                                                                                                                                                                                                                                                                                                                                                                                                                                                                                                                                                                                                                                                                                                                                                                                                                                                                                                                                                                                                                                                                                                                                                                                                                                                                                                                                                                                                                                                                                                                                                                                                                                                                        |
| VC_1341_0 | MT135269,MT135429                                                                                                                                                                                                                                                                                                                                                                                                                                                                                                                                                                                                                                                                                                                                                                                                                                                                                                                                                                                                                                                                                                                                                                                                                                                                                                                                                                                                                                                                                                                                                                                                                                                                                                                                                                                                                                                                                                                                                                                                                                                                                                                                                                                                                                                                                                                                                                                                                                                                                                                                                                                                                                                                                                                                                                                                                                                                                                                                                                                                                                                                                                                                                                                                                                                                                                                                                                                                                                                                                                                                                                                                                                                                                                                                                                                                                                                                                                                                                                                                                                                                                                                                                                                                                                                                                                                                                                                                                                                                                                                                                                                                                                                                                                                                                                                                                                                                                                                                                                                                                                                                                                                                                                                                                                                                                                                                                                                                                                                                                                                                                                                                                                                                                                                                                                                                                                                                                                                                                                                                                                                                                                                                                                                                                                                                                                                                                                                                                                                                                                                                                                                                                                                                                                                                                                                                                                                                                                                                                                                                                                                                                                                                                                                                                                                                                                                                                                                                                                                                                                                                                                                                                                                                                                                                                                                                                                                                                                                                                                                                                                                                                                                                                                                                                                                                                                                                                                                                                                                                                                                                                                                                                                                                                                                                                                                                                                                                                                                                                                                                                                                                                                                                                                                                                                                                                                                                                                                                                                                                                                                                                                                                                                                                                                                                                                                                                                                                                                                                                                                                                                                                                                                                                                                                                                                                                                                                                                                                                                                                                                                                                                                                                                                                                                                                                                                                                                                                                                                                                                                                                                                                                                                                                                                                                                                                                                                                                                                                                                                                                                                                                                                                                                                                   |
| VC_1342_0 | MG945857,MG945859,MG945866                                                                                                                                                                                                                                                                                                                                                                                                                                                                                                                                                                                                                                                                                                                                                                                                                                                                                                                                                                                                                                                                                                                                                                                                                                                                                                                                                                                                                                                                                                                                                                                                                                                                                                                                                                                                                                                                                                                                                                                                                                                                                                                                                                                                                                                                                                                                                                                                                                                                                                                                                                                                                                                                                                                                                                                                                                                                                                                                                                                                                                                                                                                                                                                                                                                                                                                                                                                                                                                                                                                                                                                                                                                                                                                                                                                                                                                                                                                                                                                                                                                                                                                                                                                                                                                                                                                                                                                                                                                                                                                                                                                                                                                                                                                                                                                                                                                                                                                                                                                                                                                                                                                                                                                                                                                                                                                                                                                                                                                                                                                                                                                                                                                                                                                                                                                                                                                                                                                                                                                                                                                                                                                                                                                                                                                                                                                                                                                                                                                                                                                                                                                                                                                                                                                                                                                                                                                                                                                                                                                                                                                                                                                                                                                                                                                                                                                                                                                                                                                                                                                                                                                                                                                                                                                                                                                                                                                                                                                                                                                                                                                                                                                                                                                                                                                                                                                                                                                                                                                                                                                                                                                                                                                                                                                                                                                                                                                                                                                                                                                                                                                                                                                                                                                                                                                                                                                                                                                                                                                                                                                                                                                                                                                                                                                                                                                                                                                                                                                                                                                                                                                                                                                                                                                                                                                                                                                                                                                                                                                                                                                                                                                                                                                                                                                                                                                                                                                                                                                                                                                                                                                                                                                                                                                                                                                                                                                                                                                                                                                                                                                                                                                                                                                          |
| VC_1343_0 | MH271292,MH271301,MK737941,MK801731,MK801732,MN497954,MT522001,MT522003,MT639643,MT684591,MT684592,MT818420,MW055903,MW291025,MZ681513,OK040788,OK318957,ON526977,ON637767,ON755183,OP580517                                                                                                                                                                                                                                                                                                                                                                                                                                                                                                                                                                                                                                                                                                                                                                                                                                                                                                                                                                                                                                                                                                                                                                                                                                                                                                                                                                                                                                                                                                                                                                                                                                                                                                                                                                                                                                                                                                                                                                                                                                                                                                                                                                                                                                                                                                                                                                                                                                                                                                                                                                                                                                                                                                                                                                                                                                                                                                                                                                                                                                                                                                                                                                                                                                                                                                                                                                                                                                                                                                                                                                                                                                                                                                                                                                                                                                                                                                                                                                                                                                                                                                                                                                                                                                                                                                                                                                                                                                                                                                                                                                                                                                                                                                                                                                                                                                                                                                                                                                                                                                                                                                                                                                                                                                                                                                                                                                                                                                                                                                                                                                                                                                                                                                                                                                                                                                                                                                                                                                                                                                                                                                                                                                                                                                                                                                                                                                                                                                                                                                                                                                                                                                                                                                                                                                                                                                                                                                                                                                                                                                                                                                                                                                                                                                                                                                                                                                                                                                                                                                                                                                                                                                                                                                                                                                                                                                                                                                                                                                                                                                                                                                                                                                                                                                                                                                                                                                                                                                                                                                                                                                                                                                                                                                                                                                                                                                                                                                                                                                                                                                                                                                                                                                                                                                                                                                                                                                                                                                                                                                                                                                                                                                                                                                                                                                                                                                                                                                                                                                                                                                                                                                                                                                                                                                                                                                                                                                                                                                                                                                                                                                                                                                                                                                                                                                                                                                                                                                                                                                                                                                                                                                                                                                                                                                                                                                                                                                                                                                                                                        |
| VC_1344_0 | MH045557,MH045561,MH371111,MH371118,MH371124,MH399783,MH576963,MH651181,MH744416,MH779512,MH825700,MK524502,MK620897,MK801730,MK878899,MK894434,MN010755,MN010759,MN284892,MN329679,MN369745,MN428062,MN428064,MN585990,MN586008,MN586010,MT310864,MT316458,MT316459,MT316462,MT498038,MT498040,MT498046,MT498047,MT498051,MT498065,MT498067,MT521990,MT639642,MT639647,MT657332,MT776807,MT952850,MW055907,MW055909,MW291020,MW321655,MW507127,MW924642,MZ005676,MZ005678,MZ005679,MZ005680,MZ005681,MZ005682,MZ005683,MZ005684,MZ005685,MZ005686,MZ005687,MZ005688,MZ005689,MZ005690,MZ005691,MZ005692,MZ005693,MZ005694,MZ005695,MZ005696,MZ005697,MZ005698,MZ005699,MZ005700,MZ005701,MZ005702,MZ005703,MZ005704,MZ005705,MZ005706,MZ005707,MZ005708,MZ005709,MZ005710,MZ005711,MZ005712,MZ005713,MZ005714,MZ005715,MZ005716,MZ005717,MZ005718,MZ005719,MZ005720,MZ005721,MZ005722,MZ005723,MZ005724,MZ005725,MZ005726,MZ005727,MZ005728,MZ005729,MZ005730,MZ005731,MZ005732,MZ005733,MZ005734,MZ005735,MZ005736,MZ005737,MZ005738,MZ005739,MZ005740,MZ005741,MZ005742,MZ005743,MZ005744,MZ005745,MZ005746,MZ005747,MZ005748,MZ005749,MZ005750,MZ005751,MZ005752,MZ005753,MZ005754,MZ005755,MZ005756,MZ005757,MZ005758,MZ005759,MZ005760,MZ005761,MZ005762,MZ005763,MZ005764,MZ005765,MZ005766,MZ005767,MZ005768,MZ005769,MZ005770,MZ005771,MZ005772,MZ005773,MZ005774,MZ005775,MZ005776,MZ005777,MZ005778,MZ005779,MZ005780,MZ005781,MZ005782,MZ005783,MZ005784,MZ005785,MZ005786,MZ005787,MZ005788,MZ005789,MZ005790,MZ005791,MZ005792,MZ005793,MZ005794,MZ005795,MZ005796,MZ005797,MZ005798,MZ005799,MZ005800,MZ005801,MZ005802,MZ005803,MZ005804,MZ005805,MZ005806,MZ005807,MZ005808,MZ005809,MZ005810,MZ005811,MZ005812,MZ005813,MZ005814,MZ005815,MZ005816,MZ005817,MZ005818,MZ005819,MZ005820,MZ005821,MZ005822,MZ005823,MZ005824,MZ005825,MZ005826,MZ005827,MZ005828,MZ005829,MZ005830,MZ005831,MZ005832,MZ005833,MZ005834,MZ005835,MZ005836,MZ005837,MZ005838,MZ005839,MZ005840,MZ005841,MZ005842,MZ005843,MZ005844,MZ005845,MZ005846,MZ005847,MZ005848,MZ005849,MZ005850,MZ005851,MZ005852,MZ005853,MZ005854,MZ005855,MZ005856,MZ005857,MZ005858,MZ005859,MZ005860,MZ005861,MZ005862,MZ005863,MZ005864,MZ005865,MZ005866,MZ005867,MZ005868,MZ005869,MZ005870,MZ005871,MZ005872,MZ005873,MZ005874,MZ005875,MZ005876,MZ005877,MZ005878,MZ005879,MZ005880,MZ005881,MZ005882,MZ005883,MZ005884,MZ005885,MZ005886,MZ005887,MZ005888,MZ005889,MZ005890,MZ005891,MZ005892,MZ005893,MZ005894,MZ005895,MZ005896,MZ005897,MZ005898,MZ005899,MZ005900,MZ005901,MZ005902,MZ005903,MZ005904,MZ005905,MZ005906,MZ005907,MZ005908,MZ005909,MZ005910,MZ005911,MZ005912,MZ005913,MZ005914,MZ005915,MZ005916,MZ005917,MZ005918,MZ005919,MZ005920,MZ005921,MZ005922,MZ005923,MZ005924,MZ005925,MZ005926,MZ005927,MZ005928,MZ005929,MZ005930,MZ005931,MZ005932,MZ005933,MZ005934,MZ005935,MZ005936,MZ005937,MZ005938,MZ005939,MZ005940,MZ005941,MZ005942,MZ005943,MZ005944,MZ005945,MZ005946,MZ005947,MZ005948,MZ005949,MZ005950,MZ005951,MZ005952,MZ005953,MZ005954,MZ005955,MZ005956,MZ005957,MZ005958,MZ005959,MZ005960,MZ005961,MZ005962,MZ005963,MZ005964,MZ005965,MZ005966,MZ005967,MZ005968,MZ005969,MZ005970,MZ005971,MZ005972,MZ005973,MZ005974,MZ005975,MZ005976,MZ005977,MZ005978,MZ005979,MZ005980,MZ005981,MZ005982,MZ005983,MZ005984,MZ005985,MZ005986,MZ005987,MZ005988,MZ005989,MZ005990,MZ005991,MZ005992,MZ005993,MZ005994,MZ005995,MZ005996,MZ005997,MZ005998,MZ005999,MZ006000,MZ006001,MZ006002,MZ006003,MZ006004,MZ006005,MZ006006,MZ006007,MZ006008,MZ006009,MZ006010,MZ006011,MZ006012,MZ006013,MZ006014,MZ006015,MZ006016,MZ006017,MZ006018,MZ006019,MZ006020,MZ006021,MZ006022,MZ006023,MZ006024,MZ006025,MZ006026,MZ006027,MZ006028,MZ006029,MZ006030,MZ006031,MZ006032,MZ006033,MZ006034,MZ006035,MZ006036,MZ006037,MZ006038,MZ006039,MZ006040,MZ006041,MZ006042,MZ006043,MZ006044,MZ006045,MZ006046,MZ006047,MZ006048,MZ006049,MZ006050,MZ006051,MZ006052,MZ006053,MZ006054,MZ006055,MZ006056,MZ006057,MZ006058,MZ006059,MZ006060,MZ006061,MZ006062,MZ006063,MZ006064,MZ006065,MZ006066,MZ006067,MZ006068,MZ006069,MZ006070,MZ006071,MZ006072,MZ006073,MZ006074,MZ006075,MZ006076,MZ006077,MZ006078,MZ006079,MZ006080,MZ006081,MZ006082,MZ006083,MZ006084,MZ006085,MZ006086,MZ006087,MZ006088,MZ006089,MZ006090,MZ006091,MZ006092,MZ006093,MZ006094,MZ006095,MZ006096,MZ006097,MZ006098,MZ006099,MZ006100,MZ006101,MZ006102,MZ006103,MZ006104,MZ006105,MZ006106,MZ006107,MZ006108,MZ006109,MZ006110,MZ006111,MZ006112,MZ006113,MZ006114,MZ006115,MZ006116,MZ006117,MZ006118,MZ006119,MZ006120,MZ006121,MZ006122,MZ006123,MZ006124,MZ006125,MZ006126,MZ006127,MZ006128,MZ006129,MZ006130,MZ006131,MZ006132,MZ006133,MZ006134,MZ006135,MZ006136,MZ006137,MZ006138,MZ006139,MZ006140,MZ006141,MZ006142,MZ006143,MZ006144,MZ006145,MZ006146,MZ006147,MZ006148,MZ006149,MZ006150,MZ006151,MZ006152,MZ006153,MZ006154,MZ006155,MZ006156,MZ006157,MZ006158,MZ006159,MZ006160,MZ006161,MZ006162,MZ006163,MZ006164,MZ006165,MZ006166,MZ006167,MZ006168,MZ006169,MZ006170,MZ006171,MZ006172,MZ006173,MZ006174,MZ006175,MZ006176,MZ006177,MZ006178,MZ006179,MZ006180,MZ006181,MZ006182,MZ006183,MZ006184,MZ006185,MZ006186,MZ006187,MZ006188,MZ006189,MZ006190,MZ006191,MZ006192,MZ006193,MZ006194,MZ006195,MZ006196,MZ006197,MZ006198,MZ006199,MZ006200,MZ006201,MZ006202,MZ006203,MZ006204,MZ006205,MZ006206,MZ006207,MZ006208,MZ006209,MZ006210,MZ006211,MZ006212,MZ006213,MZ006214,MZ006215,MZ006216,MZ006217,MZ006218,MZ006219,MZ006220,MZ006221,MZ006222,MZ006223,MZ006224,MZ006225,MZ006226,MZ006227,MZ006228,MZ006229,MZ006230,MZ006231,MZ006232,MZ006233,MZ006234,MZ006235,MZ006236,MZ006237,MZ006238,MZ006239,MZ006240,MZ006241,MZ006242,MZ006243,MZ006244,MZ006245,MZ006246,MZ006247,MZ006248,MZ006249,MZ006250,MZ006251,MZ006252,MZ006253,MZ006254,MZ006255,MZ006256,MZ006257,MZ006258,MZ006259,MZ006260,MZ006261,MZ006262,MZ006263,MZ006264,MZ006265,MZ006266,MZ006267,MZ006268,MZ006269,MZ006270,MZ006271,MZ006272,MZ006273,MZ006274,MZ006275,MZ006276,MZ006277,MZ006278,MZ006279,MZ006280,MZ006281,MZ006282,MZ006283,MZ006284,MZ006285,MZ006286,MZ006287,MZ006288,MZ006289,MZ006290,MZ006291,MZ006292,MZ006293,MZ006294,MZ006295,MZ006296,MZ006297,MZ006298,MZ006299,MZ006300,MZ006301,MZ006302,MZ006303,MZ006304,MZ006305,MZ006306,MZ006307,MZ006308,MZ006309,MZ006310,MZ006311,MZ006312,MZ006313,MZ006314,MZ006315,MZ006316,MZ006317,MZ006318,MZ006319,MZ006320,MZ006321,MZ006322,MZ006323,MZ006324,MZ006325,MZ006326,MZ006327,MZ006328,MZ006329,MZ006330,MZ006331,MZ006332,MZ006333,MZ006334,MZ006335,MZ006336,MZ006337,MZ006338,MZ006339,MZ006340,MZ006341,MZ006342,MZ006343,MZ006344,MZ006345,MZ006346,MZ006347,MZ006348,MZ006349,MZ006350,MZ006351,MZ006352,MZ006353,MZ006354,MZ006355,MZ006356,MZ006357,MZ006358,MZ006359,MZ006360,MZ006361,MZ006362,MZ006363,MZ006364,MZ006365,MZ006366,MZ006367,MZ006368,MZ006369,MZ006370,MZ006371,MZ006372,MZ006373,MZ006374,MZ006375,MZ006376,MZ006377,MZ006378,MZ006379,MZ006380,MZ006381,MZ006382,MZ006383,MZ006384,MZ006385,MZ006386,MZ006387,MZ006388,MZ006389,MZ006390,MZ006391,MZ006392,MZ006393,MZ006394,MZ006395,MZ006396,MZ006397,MZ006398,MZ006399,MZ006400,MZ006401,MZ006402,MZ006403,MZ006404,MZ006405,MZ006406,MZ006407,MZ006408,MZ006409,MZ006410,MZ006411,MZ006412,MZ006413,MZ006414,MZ006415,MZ006416,MZ006417,MZ006418,MZ006419,MZ006420,MZ006421,MZ006422,MZ006423,MZ006424,MZ006425,MZ006426,MZ006427,MZ006428,MZ006429,MZ006430,MZ006431,MZ006432,MZ006433,MZ006434,MZ006435,MZ006436,MZ006437,MZ006438,MZ006439,MZ006440,MZ006441,MZ006442,MZ006443,MZ006444,MZ006445,MZ006446,MZ006447,MZ006448,MZ006449,MZ006450,MZ006451,MZ006452,MZ006453,MZ006454,MZ006455,MZ006456,MZ006457,MZ006458,MZ006459,MZ006460,MZ006461,MZ006462,MZ006463,MZ006464,MZ006465,MZ006466,MZ006467,MZ006468,MZ006469,MZ006470,MZ006471,MZ006472,MZ006473,MZ006474,MZ006475,MZ006476,MZ006477,MZ006478,MZ006479,MZ006480,MZ006481,MZ006482,MZ006483,MZ006484,MZ006485,MZ006486,MZ006487,MZ006488,MZ006489,MZ006490,MZ006491,MZ006492,MZ006493,MZ006494,MZ006495,MZ006496,MZ006497,MZ006498,MZ006499,MZ006500,MZ006501,MZ006502,MZ006503,MZ006504,MZ006505,MZ006506,MZ006507,MZ006508,MZ006509,MZ006510,MZ006511,MZ006512,MZ006513,MZ006514,MZ006515,MZ006516,MZ006517,MZ006518,MZ006519,MZ006520,MZ006521,MZ006522,MZ006523,MZ006524,MZ006525,MZ006526,MZ006527,MZ006528,MZ006529,MZ006530,MZ006531,MZ006532,MZ006533,MZ006534,MZ006535,MZ006536,MZ006537,MZ006538,MZ006539,MZ006540,MZ006541,MZ006542,MZ006543,MZ006544,MZ006545,MZ006546,MZ006547,MZ006548,MZ006549,MZ006550,MZ006551,MZ006552,MZ006553,MZ006554,MZ006555,MZ006556,MZ006557,MZ006558,MZ006559,MZ006560,MZ006561,MZ006562,MZ006563,MZ006564,MZ006565,MZ006566,MZ006567,MZ006568,MZ006569,MZ006570,MZ006571,MZ006572,MZ006573,MZ006574,MZ006575,MZ006576,MZ006577,MZ006578,MZ006579,MZ006580,MZ006581,MZ006582,MZ006583,MZ006584,MZ006585,MZ006586,MZ006587,MZ006588,MZ006589,MZ006590,MZ006591,MZ006592,MZ006593,MZ006594,MZ006595,MZ006596,MZ006597,MZ006598,MZ006599,MZ006600,MZ006601,MZ006602,MZ006603,MZ006604,MZ006605,MZ006606,MZ006607,MZ006608,MZ006609,MZ006610,MZ006611,MZ006612,MZ006613,MZ006614,MZ006615,MZ006616,MZ006617,MZ006618,MZ006619,MZ006620,MZ006621,MZ006622,MZ006623,MZ006624,MZ006625,MZ006626,MZ006627,MZ006628,MZ006629,MZ006630,MZ006631,MZ006632,MZ006633,MZ006634,MZ006635,MZ006636,MZ006637,MZ006638,MZ006639,MZ006640,MZ006641,MZ006642,MZ006643,MZ006644,MZ006645,MZ006646,MZ006647,MZ006648,MZ006649,MZ006650,MZ006651,MZ006652,MZ006653,MZ006654,MZ006655,MZ006656,MZ006657,MZ006658,MZ006659,MZ006660,MZ006661,MZ006662,MZ006663,MZ006664,MZ006665,MZ006666,MZ006667,MZ006668,MZ006669,MZ006670,MZ006671,MZ006672,MZ006673,MZ006674,MZ006675,MZ006676,MZ006677,MZ006678,MZ006679,MZ006680,MZ006681,MZ006682,MZ006683,MZ006684,MZ006685,MZ006686,MZ006687,MZ006688,MZ006689,MZ006690,MZ006691,MZ006692,MZ006693,MZ006694,MZ006695,MZ006696,MZ006697,MZ006698,MZ006699,MZ006700,MZ006701,MZ006702,MZ006703,MZ006704,MZ006705,MZ006706,MZ006707,MZ006708,MZ006709,MZ006710,MZ006711,MZ006712,MZ006713,MZ006714,MZ006715,MZ006716,MZ006717,MZ006718,MZ006719,MZ006720,MZ006721,MZ006722,MZ006723,MZ006724,MZ006725,MZ006726,MZ006727,MZ006728,MZ006729,MZ006730,MZ006731,MZ006732,MZ006733,MZ006734,MZ006735,MZ006736,MZ006737,MZ006738,MZ006739,MZ006740,MZ006741,MZ006742,MZ006743,MZ006744,MZ006745,MZ006746,MZ006747,MZ006748,MZ006749,MZ006750,MZ006751,MZ006752,MZ006753,MZ006754,MZ006755,MZ006756,MZ006757,MZ006758,MZ006759,MZ006760,MZ006761,MZ006762,MZ006763,MZ006764,MZ006765,MZ006766,MZ006767,MZ006768,MZ006769,MZ006770,MZ006771,MZ006772,MZ006773,MZ006774,MZ006775,MZ006776,MZ006777,MZ006778,MZ006779,MZ006780,MZ006781,MZ006782,MZ006783,MZ006784,MZ006785,MZ006786,MZ006787,MZ006788,MZ006789,MZ006790,MZ006791,MZ006792,MZ006793,MZ006794,MZ006795,MZ006796,MZ006797,MZ006798,MZ006799,MZ006800,MZ006801,MZ006802,MZ006803,MZ006804,MZ006805,MZ006806,MZ006807,MZ006808,MZ006809,MZ006810,MZ006811,MZ006812,MZ006813,MZ006814,MZ006815,MZ006816,MZ006817,MZ006818,MZ006819,MZ006820,MZ006821,MZ006822,MZ006823,MZ006824,MZ006825,MZ006826,MZ006827,MZ006828,MZ006829,MZ006830,MZ006831,MZ006832,MZ006833,MZ006834,MZ006835,MZ006836,MZ006837,MZ006838,MZ006839,MZ006840,MZ006841,MZ006842,MZ006843,MZ006844,MZ006845,MZ006846,MZ006847,MZ006848,MZ006849,MZ006850,MZ006851,MZ006852,MZ006853,MZ006854,MZ006855,MZ006856,MZ006857,MZ006858,MZ006859,MZ006860,MZ006861,MZ006862,MZ006863,MZ006864,MZ006865,MZ006866,MZ006867,MZ006868,MZ006869,MZ006870,MZ006871,MZ006872,MZ006873,MZ006 |



|           |                                                                                                                                                                                                                                                                                                                                                                                                                                                                                                                                                                                                                                                                                                                                                                                                                                                                                                                                                                                                                                                                                                                                                                                                                                                                                                                                                                                                                                                                                                                                                                                                                                                                                                                                                                                                                                                                                                                                                                                                                                                                                                                                                                                                                  |
|-----------|------------------------------------------------------------------------------------------------------------------------------------------------------------------------------------------------------------------------------------------------------------------------------------------------------------------------------------------------------------------------------------------------------------------------------------------------------------------------------------------------------------------------------------------------------------------------------------------------------------------------------------------------------------------------------------------------------------------------------------------------------------------------------------------------------------------------------------------------------------------------------------------------------------------------------------------------------------------------------------------------------------------------------------------------------------------------------------------------------------------------------------------------------------------------------------------------------------------------------------------------------------------------------------------------------------------------------------------------------------------------------------------------------------------------------------------------------------------------------------------------------------------------------------------------------------------------------------------------------------------------------------------------------------------------------------------------------------------------------------------------------------------------------------------------------------------------------------------------------------------------------------------------------------------------------------------------------------------------------------------------------------------------------------------------------------------------------------------------------------------------------------------------------------------------------------------------------------------|
| VC_1357_0 | MH572490,MH572491,MH572518,MH572519,MH572520                                                                                                                                                                                                                                                                                                                                                                                                                                                                                                                                                                                                                                                                                                                                                                                                                                                                                                                                                                                                                                                                                                                                                                                                                                                                                                                                                                                                                                                                                                                                                                                                                                                                                                                                                                                                                                                                                                                                                                                                                                                                                                                                                                     |
| VC_1358_0 | MH707430,MW354669,MW354676,MW354677,MW354678                                                                                                                                                                                                                                                                                                                                                                                                                                                                                                                                                                                                                                                                                                                                                                                                                                                                                                                                                                                                                                                                                                                                                                                                                                                                                                                                                                                                                                                                                                                                                                                                                                                                                                                                                                                                                                                                                                                                                                                                                                                                                                                                                                     |
| VC_1359_0 | MH730557,MZ230992,MZ230993,MZ230994,MZ230995,MZ230996,MZ230997,MZ230998,MZ230999,MZ231000,MZ231001                                                                                                                                                                                                                                                                                                                                                                                                                                                                                                                                                                                                                                                                                                                                                                                                                                                                                                                                                                                                                                                                                                                                                                                                                                                                                                                                                                                                                                                                                                                                                                                                                                                                                                                                                                                                                                                                                                                                                                                                                                                                                                               |
| VC_136_0  | MH375644,MT366762                                                                                                                                                                                                                                                                                                                                                                                                                                                                                                                                                                                                                                                                                                                                                                                                                                                                                                                                                                                                                                                                                                                                                                                                                                                                                                                                                                                                                                                                                                                                                                                                                                                                                                                                                                                                                                                                                                                                                                                                                                                                                                                                                                                                |
| VC_1360_0 | MK308638,MK757449,MK878904,MK894435,MK894438,MN310546,MN369747,MT310869,MT310875,MT310887,MT310888,MT310889,MT310890,MT310891,MT498064,MT657334,MT657337,MT684587,MT771344,MW055914,MW291018,MW365947,MW365948,MW507124,MW862991,MZ388554,OM9135                                                                                                                                                                                                                                                                                                                                                                                                                                                                                                                                                                                                                                                                                                                                                                                                                                                                                                                                                                                                                                                                                                                                                                                                                                                                                                                                                                                                                                                                                                                                                                                                                                                                                                                                                                                                                                                                                                                                                                 |
| VC_1361_0 | 87,ON081328,ON456346,ON970584,OP297538                                                                                                                                                                                                                                                                                                                                                                                                                                                                                                                                                                                                                                                                                                                                                                                                                                                                                                                                                                                                                                                                                                                                                                                                                                                                                                                                                                                                                                                                                                                                                                                                                                                                                                                                                                                                                                                                                                                                                                                                                                                                                                                                                                           |
| VC_1362_0 | MH825698,MN062711,MT024863,ON260817,ONS26980,OP068335                                                                                                                                                                                                                                                                                                                                                                                                                                                                                                                                                                                                                                                                                                                                                                                                                                                                                                                                                                                                                                                                                                                                                                                                                                                                                                                                                                                                                                                                                                                                                                                                                                                                                                                                                                                                                                                                                                                                                                                                                                                                                                                                                            |
| VC_1363_0 | MH834607,MH834622,MK757448,MT024867,MT024870,MT889364                                                                                                                                                                                                                                                                                                                                                                                                                                                                                                                                                                                                                                                                                                                                                                                                                                                                                                                                                                                                                                                                                                                                                                                                                                                                                                                                                                                                                                                                                                                                                                                                                                                                                                                                                                                                                                                                                                                                                                                                                                                                                                                                                            |
| VC_1364_0 | MH939157,MK071653                                                                                                                                                                                                                                                                                                                                                                                                                                                                                                                                                                                                                                                                                                                                                                                                                                                                                                                                                                                                                                                                                                                                                                                                                                                                                                                                                                                                                                                                                                                                                                                                                                                                                                                                                                                                                                                                                                                                                                                                                                                                                                                                                                                                |
| VC_1365_0 | MH992154,MK249216,MK249217                                                                                                                                                                                                                                                                                                                                                                                                                                                                                                                                                                                                                                                                                                                                                                                                                                                                                                                                                                                                                                                                                                                                                                                                                                                                                                                                                                                                                                                                                                                                                                                                                                                                                                                                                                                                                                                                                                                                                                                                                                                                                                                                                                                       |
| VC_1366_0 | MH992155,MH992196,MH992205                                                                                                                                                                                                                                                                                                                                                                                                                                                                                                                                                                                                                                                                                                                                                                                                                                                                                                                                                                                                                                                                                                                                                                                                                                                                                                                                                                                                                                                                                                                                                                                                                                                                                                                                                                                                                                                                                                                                                                                                                                                                                                                                                                                       |
| VC_1367_0 | MH992167,MK496682                                                                                                                                                                                                                                                                                                                                                                                                                                                                                                                                                                                                                                                                                                                                                                                                                                                                                                                                                                                                                                                                                                                                                                                                                                                                                                                                                                                                                                                                                                                                                                                                                                                                                                                                                                                                                                                                                                                                                                                                                                                                                                                                                                                                |
| VC_1368_0 | MH992171,MW202680                                                                                                                                                                                                                                                                                                                                                                                                                                                                                                                                                                                                                                                                                                                                                                                                                                                                                                                                                                                                                                                                                                                                                                                                                                                                                                                                                                                                                                                                                                                                                                                                                                                                                                                                                                                                                                                                                                                                                                                                                                                                                                                                                                                                |
| VC_1369_0 | MK305890,MK620900,OP434453                                                                                                                                                                                                                                                                                                                                                                                                                                                                                                                                                                                                                                                                                                                                                                                                                                                                                                                                                                                                                                                                                                                                                                                                                                                                                                                                                                                                                                                                                                                                                                                                                                                                                                                                                                                                                                                                                                                                                                                                                                                                                                                                                                                       |
| VC_137_0  | AJ609634,MK448910,OL774867                                                                                                                                                                                                                                                                                                                                                                                                                                                                                                                                                                                                                                                                                                                                                                                                                                                                                                                                                                                                                                                                                                                                                                                                                                                                                                                                                                                                                                                                                                                                                                                                                                                                                                                                                                                                                                                                                                                                                                                                                                                                                                                                                                                       |
| VC_137_1  | MK448902                                                                                                                                                                                                                                                                                                                                                                                                                                                                                                                                                                                                                                                                                                                                                                                                                                                                                                                                                                                                                                                                                                                                                                                                                                                                                                                                                                                                                                                                                                                                                                                                                                                                                                                                                                                                                                                                                                                                                                                                                                                                                                                                                                                                         |
| VC_1370_0 | MK411746,MN586027                                                                                                                                                                                                                                                                                                                                                                                                                                                                                                                                                                                                                                                                                                                                                                                                                                                                                                                                                                                                                                                                                                                                                                                                                                                                                                                                                                                                                                                                                                                                                                                                                                                                                                                                                                                                                                                                                                                                                                                                                                                                                                                                                                                                |
| VC_1371_0 | MK496679,MK496680,MK496776,OM869578,OM869711                                                                                                                                                                                                                                                                                                                                                                                                                                                                                                                                                                                                                                                                                                                                                                                                                                                                                                                                                                                                                                                                                                                                                                                                                                                                                                                                                                                                                                                                                                                                                                                                                                                                                                                                                                                                                                                                                                                                                                                                                                                                                                                                                                     |
| VC_1372_0 | MK496698,MK496772                                                                                                                                                                                                                                                                                                                                                                                                                                                                                                                                                                                                                                                                                                                                                                                                                                                                                                                                                                                                                                                                                                                                                                                                                                                                                                                                                                                                                                                                                                                                                                                                                                                                                                                                                                                                                                                                                                                                                                                                                                                                                                                                                                                                |
| VC_1373_0 | MK496681,MK496760                                                                                                                                                                                                                                                                                                                                                                                                                                                                                                                                                                                                                                                                                                                                                                                                                                                                                                                                                                                                                                                                                                                                                                                                                                                                                                                                                                                                                                                                                                                                                                                                                                                                                                                                                                                                                                                                                                                                                                                                                                                                                                                                                                                                |
| VC_1374_0 | MK496683,MK496761                                                                                                                                                                                                                                                                                                                                                                                                                                                                                                                                                                                                                                                                                                                                                                                                                                                                                                                                                                                                                                                                                                                                                                                                                                                                                                                                                                                                                                                                                                                                                                                                                                                                                                                                                                                                                                                                                                                                                                                                                                                                                                                                                                                                |
| VC_1375_0 | MK496686,MK496764                                                                                                                                                                                                                                                                                                                                                                                                                                                                                                                                                                                                                                                                                                                                                                                                                                                                                                                                                                                                                                                                                                                                                                                                                                                                                                                                                                                                                                                                                                                                                                                                                                                                                                                                                                                                                                                                                                                                                                                                                                                                                                                                                                                                |
| VC_1376_0 | MK496688,MK496690,MK496766                                                                                                                                                                                                                                                                                                                                                                                                                                                                                                                                                                                                                                                                                                                                                                                                                                                                                                                                                                                                                                                                                                                                                                                                                                                                                                                                                                                                                                                                                                                                                                                                                                                                                                                                                                                                                                                                                                                                                                                                                                                                                                                                                                                       |
| VC_1377_0 | MK496689,MK496700,MK496784                                                                                                                                                                                                                                                                                                                                                                                                                                                                                                                                                                                                                                                                                                                                                                                                                                                                                                                                                                                                                                                                                                                                                                                                                                                                                                                                                                                                                                                                                                                                                                                                                                                                                                                                                                                                                                                                                                                                                                                                                                                                                                                                                                                       |
| VC_1378_0 | MK496697,MK496780                                                                                                                                                                                                                                                                                                                                                                                                                                                                                                                                                                                                                                                                                                                                                                                                                                                                                                                                                                                                                                                                                                                                                                                                                                                                                                                                                                                                                                                                                                                                                                                                                                                                                                                                                                                                                                                                                                                                                                                                                                                                                                                                                                                                |
| VC_1379_0 | MK496699,MK496785                                                                                                                                                                                                                                                                                                                                                                                                                                                                                                                                                                                                                                                                                                                                                                                                                                                                                                                                                                                                                                                                                                                                                                                                                                                                                                                                                                                                                                                                                                                                                                                                                                                                                                                                                                                                                                                                                                                                                                                                                                                                                                                                                                                                |
| VC_138_0  | DQ340064,DQ840344                                                                                                                                                                                                                                                                                                                                                                                                                                                                                                                                                                                                                                                                                                                                                                                                                                                                                                                                                                                                                                                                                                                                                                                                                                                                                                                                                                                                                                                                                                                                                                                                                                                                                                                                                                                                                                                                                                                                                                                                                                                                                                                                                                                                |
| VC_1381_0 | MK496701,MK496702                                                                                                                                                                                                                                                                                                                                                                                                                                                                                                                                                                                                                                                                                                                                                                                                                                                                                                                                                                                                                                                                                                                                                                                                                                                                                                                                                                                                                                                                                                                                                                                                                                                                                                                                                                                                                                                                                                                                                                                                                                                                                                                                                                                                |
| VC_1382_0 | MK496710,MK496767,MK496768                                                                                                                                                                                                                                                                                                                                                                                                                                                                                                                                                                                                                                                                                                                                                                                                                                                                                                                                                                                                                                                                                                                                                                                                                                                                                                                                                                                                                                                                                                                                                                                                                                                                                                                                                                                                                                                                                                                                                                                                                                                                                                                                                                                       |
| VC_1383_0 | MK496712,MK496787                                                                                                                                                                                                                                                                                                                                                                                                                                                                                                                                                                                                                                                                                                                                                                                                                                                                                                                                                                                                                                                                                                                                                                                                                                                                                                                                                                                                                                                                                                                                                                                                                                                                                                                                                                                                                                                                                                                                                                                                                                                                                                                                                                                                |
| VC_1384_0 | MK496716,MK496790                                                                                                                                                                                                                                                                                                                                                                                                                                                                                                                                                                                                                                                                                                                                                                                                                                                                                                                                                                                                                                                                                                                                                                                                                                                                                                                                                                                                                                                                                                                                                                                                                                                                                                                                                                                                                                                                                                                                                                                                                                                                                                                                                                                                |
| VC_1385_0 | MK496717,MK496804                                                                                                                                                                                                                                                                                                                                                                                                                                                                                                                                                                                                                                                                                                                                                                                                                                                                                                                                                                                                                                                                                                                                                                                                                                                                                                                                                                                                                                                                                                                                                                                                                                                                                                                                                                                                                                                                                                                                                                                                                                                                                                                                                                                                |
| VC_1386_0 | MK496720,MK496796                                                                                                                                                                                                                                                                                                                                                                                                                                                                                                                                                                                                                                                                                                                                                                                                                                                                                                                                                                                                                                                                                                                                                                                                                                                                                                                                                                                                                                                                                                                                                                                                                                                                                                                                                                                                                                                                                                                                                                                                                                                                                                                                                                                                |
| VC_1387_0 | MK496721,MK496781,MK496786                                                                                                                                                                                                                                                                                                                                                                                                                                                                                                                                                                                                                                                                                                                                                                                                                                                                                                                                                                                                                                                                                                                                                                                                                                                                                                                                                                                                                                                                                                                                                                                                                                                                                                                                                                                                                                                                                                                                                                                                                                                                                                                                                                                       |
| VC_1388_0 | MK496725,MK496746,MK496811                                                                                                                                                                                                                                                                                                                                                                                                                                                                                                                                                                                                                                                                                                                                                                                                                                                                                                                                                                                                                                                                                                                                                                                                                                                                                                                                                                                                                                                                                                                                                                                                                                                                                                                                                                                                                                                                                                                                                                                                                                                                                                                                                                                       |
| VC_1389_0 | MK496748,MK496815                                                                                                                                                                                                                                                                                                                                                                                                                                                                                                                                                                                                                                                                                                                                                                                                                                                                                                                                                                                                                                                                                                                                                                                                                                                                                                                                                                                                                                                                                                                                                                                                                                                                                                                                                                                                                                                                                                                                                                                                                                                                                                                                                                                                |
| VC_139_0  | MK496750,MK496816                                                                                                                                                                                                                                                                                                                                                                                                                                                                                                                                                                                                                                                                                                                                                                                                                                                                                                                                                                                                                                                                                                                                                                                                                                                                                                                                                                                                                                                                                                                                                                                                                                                                                                                                                                                                                                                                                                                                                                                                                                                                                                                                                                                                |
| VC_139_1  | AY855346,LK985322                                                                                                                                                                                                                                                                                                                                                                                                                                                                                                                                                                                                                                                                                                                                                                                                                                                                                                                                                                                                                                                                                                                                                                                                                                                                                                                                                                                                                                                                                                                                                                                                                                                                                                                                                                                                                                                                                                                                                                                                                                                                                                                                                                                                |
| VC_1390_0 | DQ466086,HG531805,LN681541,LN681542                                                                                                                                                                                                                                                                                                                                                                                                                                                                                                                                                                                                                                                                                                                                                                                                                                                                                                                                                                                                                                                                                                                                                                                                                                                                                                                                                                                                                                                                                                                                                                                                                                                                                                                                                                                                                                                                                                                                                                                                                                                                                                                                                                              |
| VC_1391_0 | MK496753,MK496818                                                                                                                                                                                                                                                                                                                                                                                                                                                                                                                                                                                                                                                                                                                                                                                                                                                                                                                                                                                                                                                                                                                                                                                                                                                                                                                                                                                                                                                                                                                                                                                                                                                                                                                                                                                                                                                                                                                                                                                                                                                                                                                                                                                                |
| VC_1392_0 | MK496756,MK496824                                                                                                                                                                                                                                                                                                                                                                                                                                                                                                                                                                                                                                                                                                                                                                                                                                                                                                                                                                                                                                                                                                                                                                                                                                                                                                                                                                                                                                                                                                                                                                                                                                                                                                                                                                                                                                                                                                                                                                                                                                                                                                                                                                                                |
| VC_1393_0 | MK496758,MK496808                                                                                                                                                                                                                                                                                                                                                                                                                                                                                                                                                                                                                                                                                                                                                                                                                                                                                                                                                                                                                                                                                                                                                                                                                                                                                                                                                                                                                                                                                                                                                                                                                                                                                                                                                                                                                                                                                                                                                                                                                                                                                                                                                                                                |
| VC_1394_0 | MK496770,MK496771                                                                                                                                                                                                                                                                                                                                                                                                                                                                                                                                                                                                                                                                                                                                                                                                                                                                                                                                                                                                                                                                                                                                                                                                                                                                                                                                                                                                                                                                                                                                                                                                                                                                                                                                                                                                                                                                                                                                                                                                                                                                                                                                                                                                |
| VC_1395_0 | MK496820,OM869632                                                                                                                                                                                                                                                                                                                                                                                                                                                                                                                                                                                                                                                                                                                                                                                                                                                                                                                                                                                                                                                                                                                                                                                                                                                                                                                                                                                                                                                                                                                                                                                                                                                                                                                                                                                                                                                                                                                                                                                                                                                                                                                                                                                                |
|           | MK570053,MK570054,MK570055                                                                                                                                                                                                                                                                                                                                                                                                                                                                                                                                                                                                                                                                                                                                                                                                                                                                                                                                                                                                                                                                                                                                                                                                                                                                                                                                                                                                                                                                                                                                                                                                                                                                                                                                                                                                                                                                                                                                                                                                                                                                                                                                                                                       |
| VC_1396_0 | MK719701,MK719702,MK719703,MK719704,MK719705,MK719706,MK719707,MK719708,MK719709,MK719710,MK719711,MK719712,MK719713,MK719714,MK719715,MK719716,MK719717,MK719718,MK719719,MK719720,MK719721,MK719722,MK719723,MK719724,MK719725,MK719726,MK719727,MK719728,MK719729,MK719730,MK719731,MK719732,MK719733,MK719734,MK719735,MK719736,MK719737,MK719738,MK719739,MK719740,MK719741,MK719742,MK719743,MK719744,MK719745,MK719746,MK719747,MK719748,MK719749,MK719750,MK719751,MK719752,MK719753,MK719754,MK719755,MK719756,MK719757,MK719758,MK719759,MK719760,MK719761,MK719762,MK719763,MK719764,MK719765,MK719766,MK719767,MK719768,MK719769,MK719770,MK719771,MK719772,MK719773,MK719774,MK719775,MK719776,MK719777,MK719778,MK719779,MK719780,MK719781,MK719782,MK719783,MK719784,MK719785,MK719786,MK719787,MK719788,MK719789,MK719790,MK719791,MK719792,MK719793,MK719794,MK719795,MK719796,MK719797,MK719798,MK719799,MK719800,MK719801,MK719802,MK719803,MK719804,MK719805,MK719806,MK719807,MK719808,MK719809,MK719810,MK719811,MK719812,MK719813,MK719814,MK719815,MK719816,MK719817,MK719818,MK719819,MK719820,MK719821,MK719822,MK719823,MK719824,MK719825,MK719826,MK719827,MK719828,MK719829,MK719830,MK719831,MK719832,MK719833,MK719834,MK719835,MK719836,MK719837,MK719838,MK719839,MK719840,MK719841,MK719842,MK719843,MK719844,MK719845,MK719846,MK719847,MK719848,MK719849,MK719850,MK719851,MK719852,MK719853,MK719854,MK719855,MK719856,MK719857,MK719858,MK719859,MK719860,MK719861,MK719862,MK719863,MK719864,MK719865,MK719866,MK719867,MK719868,MK719869,MK719870,MK719871,MK719872,MK719873,MK719874,MK719875,MK719876,MK719877,MK719878,MK719879,MK719880,MK719881,MK719882,MK719883,MK719884,MK719885,MK719886,MK719887,MK719888,MK719889,MK719890,MK719891,MK719892,MK719893,MK719894,MK719895,MK719896,MK719897,MK719898,MK719899,MK719900,MK719901,MK719902,MK719903,MK719904,MK719905,MK719906,MK719907,MK719908,MK719909,MK719910,MK719911,MK719912,MK719913,MK719914,MK719915,MK719916,MK719917,MK719918,MK719919,MK719920,MK719921,MK719922,MK719923,MK719924,MK719925,MK719926,MK719927,MK719928,MK719929,MK719930,MK719931,MK719932,MK719933,MK719934,MK719935,MK719936,MK71 |



|           |                                                                                                                                                 |
|-----------|-------------------------------------------------------------------------------------------------------------------------------------------------|
| VC_1426_0 | MT135292,MT135293,MT135296,MT135305                                                                                                             |
| VC_1427_0 | MT135332,MT135436                                                                                                                               |
| VC_1428_0 | MT135346,MT135395                                                                                                                               |
| VC_1429_0 | MT135359,MT135368,MT135374,MT135378,MT135399,MT135414,MT135419,MT135463                                                                         |
| VC_143_0  | KT626446,ON699007                                                                                                                               |
| VC_1430_0 | MT135369,MT135396,MT135454,MT135460                                                                                                             |
| VC_1431_0 | MT135375,MT135438,MT135453                                                                                                                      |
| VC_1433_0 | MT234670,ON014754                                                                                                                               |
| VC_1434_0 | ONS29863,ONS29867                                                                                                                               |
| VC_1438_0 | MT732450,MT732451,MT732452,MT732453,MT732454,MT732455                                                                                           |
| VC_144_0  | MN604230,MN604698                                                                                                                               |
| VC_1440_0 | MT952848,MZ150790,OL455892,OP068334                                                                                                             |
| VC_1441_0 | MT975991,OP433453                                                                                                                               |
| VC_1442_0 | MW202613,MW202748                                                                                                                               |
| VC_1443_0 | MW202637,MW202789                                                                                                                               |
| VC_1444_0 | MW202486,MW202591,MW202766                                                                                                                      |
| VC_1445_0 | MW202572,MW202631,MW202645,MW202742                                                                                                             |
| VC_1446_0 | MW202524,MW202718,MW202743                                                                                                                      |
| VC_1447_0 | MW202601,MW202604                                                                                                                               |
| VC_1448_0 | MW202608,MW202725,MW202812,MW202826,MW202842                                                                                                    |
| VC_1449_0 | MW202622,MW202658                                                                                                                               |
| VC_1450_0 | MW202642,MW202843,MW202852                                                                                                                      |
| VC_1451_0 | MW202657,MW202864                                                                                                                               |
| VC_1452_0 | MW202753,MW202825                                                                                                                               |
| VC_1453_0 | MW353166,MW353167,MW353168,MW353169,MW353170,MW353171,MW353172                                                                                  |
| VC_1454_0 | MW462221,MZ047271                                                                                                                               |
| VC_1457_0 | MZ089747,MZ089748                                                                                                                               |
| VC_1458_0 | MZ089769,OM869588                                                                                                                               |
| VC_1459_0 | MZ089783,OM869706                                                                                                                               |
| VC_1460_0 | MZ089787,MZ089788,OM869708                                                                                                                      |
| VC_1461_0 | MZ089790,MZ089792,MZ089794                                                                                                                      |
| VC_1462_0 | MZ089811,OM869593,OM869669,OM869712                                                                                                             |
| VC_1463_0 | MZ364235,MZ364236,MZ364238,MZ364239,MZ364257,MZ364289                                                                                           |
| VC_1464_0 | MZ364251,MZ364282,MZ364294                                                                                                                      |
| VC_1465_0 | MZ447863,MZ570427                                                                                                                               |
| VC_1466_0 | MZ474488,MZ474489                                                                                                                               |
| VC_1467_0 | OL689226,OL689227,OL689230                                                                                                                      |
| VC_1468_0 | OM869510,OM869512                                                                                                                               |
| VC_1469_0 | OM869572,OM869573                                                                                                                               |
| VC_1470_0 | OM869583,OM869672,OM869688                                                                                                                      |
| VC_1471_0 | OM869594,OM869713                                                                                                                               |
| VC_1472_0 | ON014753,ON014757                                                                                                                               |
| VC_1474_0 | ON464759,ON464763,ON464764                                                                                                                      |
| VC_1475_0 | ONS29865,ONS29866                                                                                                                               |
| VC_1476_0 | OP549878,OP549879                                                                                                                               |
| VC_1478_0 | PF3COMN,PF3COMNY                                                                                                                                |
| VC_149_0  | MT080592,MT080597,MT080598,MT080599,MT080603                                                                                                    |
| VC_149_1  | OM850391,OM850392,ON113344                                                                                                                      |
| VC_149_10 | KY794641                                                                                                                                        |
| VC_149_11 | MT080582,MT080583,MT080586,MT080594                                                                                                             |
| VC_149_12 | MH107769,MN045228                                                                                                                               |
| VC_149_13 | AB853330,JX878671,LR215719                                                                                                                      |
| VC_149_14 | AB903967                                                                                                                                        |
| VC_149_15 | JQ686190,KM216423,KY779849,LC574321,LR215718,MF001365,MG557618,MH159197,MK250904,MN304941,MT786458,MW546073,MZ427930,MZ573923,OP235318,OP323059 |
| VC_149_16 | KJ888149                                                                                                                                        |
| VC_149_17 | MT080585,MT080589,MT080591,MT080601                                                                                                             |
| VC_149_18 | MT554104                                                                                                                                        |
| VC_149_19 | OP263968                                                                                                                                        |
| VC_149_2  | LR215720                                                                                                                                        |
| VC_149_20 | KP027446                                                                                                                                        |
| VC_149_21 | MG721208                                                                                                                                        |
| VC_149_22 | MT080593,MT080596                                                                                                                               |
| VC_149_23 | AB853331                                                                                                                                        |
| VC_149_24 | MZ417322                                                                                                                                        |
| VC_149_25 | MZ417315,MZ417319,MZ417320,MZ417321,MZ417327,MZ417328,MZ417332,MZ417337,MZ417340,MZ417345,MZ417346,MZ417347,MZ417350,MZ417354                   |
| VC_149_26 | MZ417331                                                                                                                                        |
| VC_149_27 | KX011028                                                                                                                                        |
| VC_149_28 | MN935200                                                                                                                                        |
| VC_149_29 | KY794642,KY794643,LR215721                                                                                                                      |
| VC_149_3  | MT787017                                                                                                                                        |
| VC_149_4  | OL741057                                                                                                                                        |
| VC_149_5  | MN091625                                                                                                                                        |
| VC_149_6  | OP297178                                                                                                                                        |
| VC_149_7  | LC648442                                                                                                                                        |



VC\_149\_8  
AY176327,AY954969,EU418428,FR852584,HQ163896,JX080300,JX080301,JX080302,JX080303,JX080304,JX080305,JX875065,KC012913,KF766114,KJ206559,KJ206560,KJ206561,KJ206562,KJ206563, KP687431, KP687432, KR902361, KR908644, KY581279, MF398190, MF405094, MG656408, MH136584, MH844528, MH844529, MK331930, MK331931, MK417514, MK417515, MK417516, MK584893, MK656892, MN047438, MN336261, MN336262, MN336263, MN539736, MN539737, MN539738, MT080600, MT080602, MT226657, MT338525, MW460250, MW528836, MW546064, MW546065, MW546066, MW546067, MW546068, MW546069, MW546070, MW546072, MW546074, OL362280, OL960567, OL960568, OL960569, OL960570, OM030343, OM373557  
VC\_149\_9  
VC\_15\_0  
VC\_15\_1  
VC\_150\_0  
VC\_151\_0  
VC\_152\_0  
VC\_152\_1  
VC\_153\_0  
VC\_153\_1  
VC\_154\_0  
VC\_155\_0  
VC\_156\_0  
VC\_157\_0  
VC\_159\_0  
VC\_16\_0  
VC\_160\_0  
VC\_161\_0  
VC\_162\_0  
VC\_163\_0  
VC\_164\_0  
VC\_164\_1  
VC\_164\_10  
VC\_164\_11  
VC\_164\_2  
VC\_164\_3  
VC\_164\_4  
VC\_164\_5  
VC\_164\_6  
VC\_164\_7  
VC\_164\_8  
VC\_164\_9  
VC\_165\_0  
VC\_166\_0  
VC\_167\_0  
VC\_169\_0  
VC\_17\_0  
VC\_170\_0  
VC\_170\_1  
VC\_171\_0  
VC\_172\_0  
VC\_173\_0  
VC\_174\_0  
VC\_175\_0  
VC\_176\_0  
VC\_176\_1  
VC\_176\_2  
VC\_176\_3  
VC\_177\_0  
VC\_178\_0  
VC\_179\_0  
VC\_18\_0  
VC\_180\_0  
VC\_182\_0  
VC\_183\_0  
VC\_184\_0  
VC\_185\_0  
VC\_187\_0  
VC\_187\_1  
VC\_187\_2  
VC\_187\_3  
VC\_187\_4  
VC\_188\_0  
VC\_189\_0  
VC\_190\_0  
VC\_190\_1  
VC\_190\_10  
VC\_190\_11  
VC\_190\_12  
VC\_190\_13  
VC\_190\_14  
VC\_190\_15  
VC\_190\_16  
AY176327,AY954969,EU418428,FR852584,HQ163896,JX080300,JX080301,JX080302,JX080303,JX080304,JX080305,JX875065,KC012913,KF766114,KJ206559,KJ206560,KJ206561,KJ206562,KJ206563, KP687431, KP687432, KR902361, KR908644, KY581279, MF398190, MF405094, MG656408, MH136584, MH844528, MH844529, MK331930, MK331931, MK417514, MK417515, MK417516, MK584893, MK656892, MN047438, MN336261, MN336262, MN336263, MN539736, MN539737, MN539738, MT080600, MT080602, MT226657, MT338525, MW460250, MW528836, MW546064, MW546065, MW546066, MW546067, MW546068, MW546069, MW546070, MW546072, MW546074, OL362280, OL960567, OL960568, OL960569, OL960570, OM030343, OM373557  
AP018375,MT411892,OP263967  
KX827371,MK075002,OM4373558  
AY954954,MK075001,MK075004,MK450538,OM373550,OM373554,OM373555,OM373556,OM373561  
KF021268,KP027447,MH321490,MH321491,MH542234,MT596501,MT596502,MT596503,MT596504,MT596505,MT596506,MZ417323,MZ417325  
KX171212,KX171213,MW430345,MZ417329,MZ417330,MZ417344  
LC647030  
MZ417326  
AP019522,JX194239,JX846612,JX846613,KP881332,KX532239,KY779848,LC492751,LC492752,MT080584,MT080587,MT080588,MT080590,MT080595,MW363798,MW546071,MW546075,MW546076,MW546077,MZ643272,ON814134,ON814135,ON814136,ON866946,OP263969  
LC576631  
AB854109,KY117485,MN844877,OL634959  
FNS94518,MT104468,MT104469,MT104470,MT104471,MT104472,MT104476,MT104477,MT354570,MW627366,MZ868714,MZ868715,MZ868716,MZ868717  
FR751545,KM247287,MK629528,MN850568,MN850570,MN850583,MN850592,MN850608,MN850617,MN850624,MN850625,MW250275  
MK962628,MK962638,MK962640  
OM913597,OM913598  
AB012573,AB012574,AB572858,AF452449,AF453500,AY242528,CP017905,CP017906,D89074,F904927,MN536023,MN690600  
MF150911,MN996301  
AB863625,MT740737,MT740741  
AY349011,F9937737,JN662425,JX104231,MH638294,MT361768,MT740727,MT740730,MT740731,MT740732,MT740733,MT740736,MT740738,MT740739,MT740740,MT740742,OM283127,OV121131  
MW202475,MW202867  
MK268344,MK773491,MT001829  
MT446416  
AB897757,JQ513383,MT708547,OP617745,OU509535  
KC295538,KM507819,LC494302,LT603033,MH383160,MH791411,MK327931,MK817115,MW822008,ON568341  
MH494197  
QN286972  
JN882285  
KU574722  
OP292654  
KY630187,MT939486,MT939487,MT939488,MW879342,MW879343,MW879344  
LR596615,LT960551,LT960552  
MG592671  
LC727697,LC727698,LR588166,MK797984  
AM749441,DQ163916,JX131330,KC758116,KF734862,KX198613,KX961385,KY000218,KY000219,KY000220,KY000221,MF490239,MH791403,MH791406,MN871456,MN871463,MN871469,MN871478,MN871482,MN871486,MT118302,MZ2089734,MZ089741,OL763419,OM809160,ON165687  
AB910392,MK443266,MK803322  
JQ067089,JQ067093,KU204984,KX241618,LR743532,MG018224,MT664984,OK275492,OK275493,OL674541,ON005621,ON189045,ON189047,ON331942,ON529854,ON932079,ON932080,ON932084,OP361299,OP380269  
AB043678,AB043679,MN719123,MT188662,MT188663,MT188664,MT188665,MT188666,MT193890  
KT001913  
KY006853  
KP202969,KP202970,MH746817,MK962627,MK962633,MK962634,MT241605,MT241607  
KF626665,KF626668,LR743524,MZ326855,ON189048  
KT887558,MG707188  
AB910393,LC102729,OK094707  
MG592578,MG592660,MW865292,OX241572  
AF165214,HQ711985  
KT887557,ON857940  
OM141125  
KT968831  
AB910602,HG315669,KX181651,KY853667,MN335248  
MH206183,MH206184,MH218848,MK512531,MN263053  
AY394005,DQ631426,DQ873690,EU272036,EU272037,HE584812,HM624080,JN808773,JN811560,JQ067085,JQ762257,JX434030,JX434031,JX434032,JX434033,KF475786,KJ477077,KM2233689,KT968832,KU199707,KU199708,KU199709,KN610590,KN907801,LT608331,LT999987,MH643777,MH643778,MK144667,MK511017,MK511018,MK511019,MK511020,MK511021,MK511022,MK511023,MK511024,MK511025,MK511026,MK511027,MK511028,MK511029,MK511030,MK511031,MK511032,MK511033,MK511034,MK511035,MK511036,MK511037,MK511038,MW390886,OM541307  
AB016282,HM072038,OM236514,ONS28935  
AB916497,ON170148,ON170170,ON170354  
JF974307,JF974308,KT381864,KT381865,KX077179  
KF302035,MZ568827  
MH727593,MZ547449  
LR797314,MP959999,MK088078  
KX961630,MN150686,OK499977,OK499983  
JN797797,JN797798,KT187252,KT224359,KX987999,MH487649,MN013089  
KJ081346,KJ676859  
JX094431,KJ451625,KT995480,KU577463,KX495186,MG602477,MH638309,MH638312,OL964058  
MN364664  
AB971354,AF059242,AF059243,EF068134,FJ483840,FJ483841,FJ483842,FJ483843,FJ483844,FJ539132,FJ539133,FJ539134,FJ539135  
AJ604530,AJ604531  
KP143763,KX130863  
MK373792  
KR422353  
AC171169  
LR027384  
MH370377,MH370378,MN970211,MN994502  
LR597655,MN022787,MN316588  
KJ190157,KY677846,MN994496  
OK272480



|           |                                                                                                                                                                                                                                                             |
|-----------|-------------------------------------------------------------------------------------------------------------------------------------------------------------------------------------------------------------------------------------------------------------|
| VC_190_17 | AP019559                                                                                                                                                                                                                                                    |
| VC_190_18 | MF402939                                                                                                                                                                                                                                                    |
| VC_190_19 | MZ501075                                                                                                                                                                                                                                                    |
| VC_190_2  | MK373797,MK373799                                                                                                                                                                                                                                           |
| VC_190_20 | LN887948,MK972715,MK972716,MT843274                                                                                                                                                                                                                         |
| VC_190_21 | KY114934                                                                                                                                                                                                                                                    |
| VC_190_22 | KM979354,KM979355,MH203051                                                                                                                                                                                                                                  |
| VC_190_23 | HQ406778,KY963424,MH102285,MN026741,MT311645,MW149273,MW149275,OK108607,OK254197,OP394141                                                                                                                                                                   |
| VC_190_24 | HQ665011,LR597659,MZ398246,OK143207,ON185585                                                                                                                                                                                                                |
| VC_190_25 | MN956514                                                                                                                                                                                                                                                    |
| VC_190_26 | MG387042                                                                                                                                                                                                                                                    |
| VC_190_27 | KR233164                                                                                                                                                                                                                                                    |
| VC_190_28 | OK665835,ON185581,ON185582,ON185583,ON185584                                                                                                                                                                                                                |
| VC_190_29 | MT080103                                                                                                                                                                                                                                                    |
| VC_190_3  | MN994504                                                                                                                                                                                                                                                    |
| VC_190_30 | MF774688                                                                                                                                                                                                                                                    |
| VC_190_31 | MG065692                                                                                                                                                                                                                                                    |
| VC_190_32 | MZ501058                                                                                                                                                                                                                                                    |
| VC_190_33 | MZ501103                                                                                                                                                                                                                                                    |
| VC_190_34 | MN445182                                                                                                                                                                                                                                                    |
| VC_190_35 | OK272477                                                                                                                                                                                                                                                    |
| VC_190_36 | MT653143                                                                                                                                                                                                                                                    |
| VC_190_37 | MT653146                                                                                                                                                                                                                                                    |
| VC_190_38 | AY543070,AY587007,AY692264                                                                                                                                                                                                                                  |
| VC_190_39 | MT233524                                                                                                                                                                                                                                                    |
| VC_190_4  | MT577844                                                                                                                                                                                                                                                    |
| VC_190_40 | MG969412,MW006479                                                                                                                                                                                                                                           |
| VC_190_5  | OM386657                                                                                                                                                                                                                                                    |
| VC_190_6  | MZ501074                                                                                                                                                                                                                                                    |
| VC_190_7  | MF431730,MF431731,MF431732,MF431733,MF431734,MF431735,MT074448                                                                                                                                                                                              |
| VC_190_8  | OM386660                                                                                                                                                                                                                                                    |
| VC_190_9  | MK373796                                                                                                                                                                                                                                                    |
| VC_191_0  | MW006478,MW006481                                                                                                                                                                                                                                           |
| VC_191_1  | MK370036                                                                                                                                                                                                                                                    |
| VC_191_10 | MN197465                                                                                                                                                                                                                                                    |
| VC_191_11 | MF681663                                                                                                                                                                                                                                                    |
| VC_191_12 | MT074464                                                                                                                                                                                                                                                    |
| VC_191_13 | MK907267,MK907268,MK907269,MK907270,MK907271                                                                                                                                                                                                                |
| VC_191_14 | LR027389                                                                                                                                                                                                                                                    |
| VC_191_15 | OL451946,OL502173                                                                                                                                                                                                                                           |
| VC_191_16 | KY787212,MF001363,MH370369,MK393882,MK947458,MK972717,MN218190,MN218191,MN379739,MN994501,MT074450,MT074458                                                                                                                                                 |
| VC_191_17 | CP000917,MK947459,MZ501105,OL770310                                                                                                                                                                                                                         |
| VC_191_18 | MT833283,MZ501072                                                                                                                                                                                                                                           |
| VC_191_19 | KM236244,KU927497,KX017521,LC659915,MC065642,MH631454,MK728824,MK728825,MN187969,MW357609,OK288022,OP045498                                                                                                                                                 |
| VC_191_2  | MZ501109                                                                                                                                                                                                                                                    |
| VC_191_20 | MK005300                                                                                                                                                                                                                                                    |
| VC_191_21 | MZ501076                                                                                                                                                                                                                                                    |
| VC_191_22 | MW567727                                                                                                                                                                                                                                                    |
| VC_191_23 | MH370379                                                                                                                                                                                                                                                    |
| VC_191_24 | MZ570151                                                                                                                                                                                                                                                    |
| VC_191_25 | MW206381                                                                                                                                                                                                                                                    |
| VC_191_26 | HE956708                                                                                                                                                                                                                                                    |
| VC_191_27 | MK867835                                                                                                                                                                                                                                                    |
| VC_191_28 | MZ501108                                                                                                                                                                                                                                                    |
| VC_191_29 | MH370375                                                                                                                                                                                                                                                    |
| VC_191_3  | MK972704,MK972707,MK972709,MT074453,MT074457                                                                                                                                                                                                                |
| VC_191_30 | MT074447,MT074461                                                                                                                                                                                                                                           |
| VC_191_31 | MK770410,MK972708                                                                                                                                                                                                                                           |
| VC_191_32 | MF431736,MF431737,MF431738,MF431739,MF431740,MF431741,MK050846,MK809530,MT074449,MT074465,MT653145,ONS26840                                                                                                                                                 |
| VC_191_33 | MW423798                                                                                                                                                                                                                                                    |
| VC_191_4  | MH370366,MT074455                                                                                                                                                                                                                                           |
| VC_191_5  | MH370386,MT004791,MT074452,MT074456,MT074460,MT074463                                                                                                                                                                                                       |
| VC_191_6  | MT074468                                                                                                                                                                                                                                                    |
| VC_191_7  | MT074467                                                                                                                                                                                                                                                    |
| VC_191_8  | MH370376,MT074454                                                                                                                                                                                                                                           |
| VC_191_9  | MH370367,MH370380,MT074459,MT074466,MW411578                                                                                                                                                                                                                |
| VC_192_0  | KX845404,MG459987,MK521907,MK630230,MN101228,MN163280,MN434094,MN434096,MT380195,MW713578,MZ571828,MZ571830,MZ634344,ON637170,OP171943                                                                                                                      |
| VC_192_1  | MZ079855                                                                                                                                                                                                                                                    |
| VC_192_2  | MN478377                                                                                                                                                                                                                                                    |
| VC_193_0  | KY363465,MW057857                                                                                                                                                                                                                                           |
| VC_195_0  | MG676224,MG676225                                                                                                                                                                                                                                           |
| VC_195_1  | MK318083                                                                                                                                                                                                                                                    |
| VC_196_0  | MN095770,ON287373                                                                                                                                                                                                                                           |
| VC_197_0  | AE002163,CMU41758,MG641183,MN862345,MW202581                                                                                                                                                                                                                |
| VC_198_0  | AJ270057,AJ550635,AY769964,MC883723,MC945324,MC945546,MC945571,MC945669,MH572277,MH572280,MH572282,MH572290,MH572330,MH572334,MH572422,MH572438,MH572444,MH572448,MH572452,MH572454,MH992157,MH992174,MH992182,MH992210,MN862343,MW202732,MW202889,OL617035 |



VC\_199\_0 KC131021,MH572341,MH572342,MH572343,MH572399,MH572400,MH572401,MH572402,MH572403,MH572453,MH572513,MH572514  
VC\_2\_0 AB008550,MK034952,MK511066,Y13918  
VC\_20\_0 KT372714,KT852578,KX190835,KX534340,MN065183  
VC\_200\_0 MH992181  
VC\_201\_0 MH572434,MH572475,MZ286294  
VC\_202\_0 AF009630,AF011378,DQ054536,DQ227763,DQ227764,EU221285,FJ848881,FJ848882,FJ848883,FJ848884,FJ848885,GQ979703,KC182542,KC182543,KC182544,KC182545,KC182546,KC182547,KC182548,KC182549,KC182550,KC182551,KC182552,KC522412,KF676640,KM091442,KP793104,KP793105,KP793108,KP793109,KP793111,KP793113,KP793115,KP793116,KP793117,KP793118,KP793123,KP793124,KP793129,KP793134,KX346246,KX379667,KX379668,KX379670,KX379671,KY554760,KY554761,MF346933,MF448554,MF448555,MF448556,MF448557,MF448558,MF448559,MF448560,MF448561,MF448562,MF448563,MF448564,MF448565,MF448566,MF448567,MF448568,MF448569,MF448570,MF448571,MF448572,MF775703,MF775704,MF775705,MG253647,MG253648,MG253649,MG253650,MG253651,MG253652,MG253653,MG309717,MG309718,MK301437,MN552148,MN552149,MN552150,MN689514,MN689517,MN689518,MN689519,MN689520,MN689522,MN689523,MN689524,MN689525,MW032477,MW041632,MW041633,MW041634,MW041635,MW041636,MW041637,MW041638,MW041639,MW041640  
VC\_209\_0 KY888143,KY926698,KY926699,MZ368140  
VC\_21\_0 JF974314,KJ746502,MF614627,MF614628  
VC\_211\_0 AP008983  
VC\_211\_1 KP144388  
VC\_211\_2 KT151959  
VC\_211\_3 MT325768  
VC\_213\_0 KT429160,MT880872  
VC\_214\_0 ON210834,ON210835  
VC\_214\_1 OM654379  
VC\_215\_0 DQ398043,KF017927,KF416344,MG099947,MN585989  
VC\_215\_1 AF022214,AP018476,AP018480,KC787102,KC787105,KC787106,KX574455,KX758538,KX897981,LC730318,MH513985,MK494087,MN234169,MT310876,MT310883,MT310884,MT310885,MW924646,OP297553  
VC\_215\_2 JF946695,KT381276,MF919536,MH020237,Z18946  
VC\_216\_0 MF185727,MF324899,MK801735,MN369748  
VC\_216\_1 MK814748  
VC\_216\_2 MN585968,MN586002  
VC\_216\_3 GU339467,JN408461,KF024721,KU761558,KU761559,KX641263,MFI40403,MH825709  
VC\_216\_4 KJ959632,MK1197169,KM677210,KU297783,KX683875,MF668269,MF919538,MH825701,MK061408,MK284522,MK967395,MZ322019,OM203159  
VC\_216\_5 MW602126,MZ209305  
VC\_216\_6 AP018479,JN408460,JX899358,KP981601,KJ410132,KJ410134,KM463009,KM591906,KT588442,KU985093,KU985095,KX576639,KX619650,KY965065,LC730320,MF472896,MF919490,MF919500,MF919531,MH051252,MH077576,MH338234,MH697591,MH825704,MK524491,MK919472,MN234203,MN585981,MN585983,MN585998,MT310877,MT310886,MT498041,MT498060,MT498066,MT658804,MW924643,MZ355728,MZ622171,MZ622182,MZ820090,OP297537  
VC\_217\_0 MT310858  
VC\_217\_1 EU744250,KU568494,KX758539,MK279857,MN703408  
VC\_218\_0 MN062708  
VC\_219\_0 KF861510,MN096376,MT639645  
VC\_22\_0 JF957060,KC661275,KP273225,MG793454,MT553337  
VC\_220\_0 AB036666,HQ906662,HQ906663,HQ906664,KX525265,MK976036,MN180248,MN180249,MN180250,MN180251,MN180252  
VC\_221\_0 KR080193,MN310541,MT522004,OM203161  
VC\_222\_0 KU695581,KY471460,MFI40410,MH338236,MH338237,MH536828,MK494130,MKS524507,MKS524511,MKS524513,MKS524514,MKS524519,MN310547,MN586006,MN703405,MN892487,MW055904,MZ747517,MZ747521,ON108640,OP297532,OP297549  
VC\_223\_0 KX665793,MH513984,MK494113,MKS524530,OM203158  
VC\_224\_0 JF704097,JF937092,JF937094,JN049605,JN698999,JN699019,KF506332,KF560333,KF560334,KM401838,KU695582,KU985096,KX375815,KX576638,KX641261,MF668288,MG099945,MG099952,MH020240,MH051253,MH155876,MH779517,MK359352,MK359360,MK494090,MK894433,MN586039,MN728683,MT024861,MT657338,MW822143,MZ0005685,MZ171376,MZ322007,MZ456034,MZ681516,OM913585,OP344447  
VC\_224\_0 KU1998249,KU1998250,KU1998251,KX557280,KX557283,KX557284,MF668282,MH001454,MH316566,MH513974,MK967382,MN284898,MN369756,MT522007,MZ028625,MZ622176,MZ681508,OM818328,OP021679  
VC\_225\_0 JF704110,JN699005,KT285706,KU613353,KU716094,KU716095,KX585252,KX664447,KX685355,MG872835,MG872840,MG872842,MH371122,MK061409,MK468591,MK494108,MK524489,MK559428,MK977713,MN234167,MN234200,MN234209,MN234235,MN310542,MN369741,MN369763,MN369764,MN585974,MN585978,MN585979,MN585994,ON724016  
VC\_227\_0 AF334111,HM066936  
VC\_228\_0 AF063097,AY135486,AY135739,AY251033,B1U32222,HQ110084,KC139521,KC618326,KF322032,KR073660,KR073661,KT630644,KX833211,LR559869,LR595870,LR595873,LR595883,LR595885,LR595887,MF276773,MK416018,MK907236,MK907237,MK907238,MK907239,MK972710,MK972711,MN016939,MT239398,MT374855,MT374857,MT374858,MZ420230,MZ520833,OK490408,OK490461,OK490464,OK490467,OK490470,OK490473,OM046626,OM046627,OM046628,OM140653,OM475426,OM475429,OM475431,OM475433,OM475434,ON146439,ON146440,ON239131,ON470601,ON470606,ON470613,ON782130,OU784549,OU784746,OU784750,OV192280  
VC\_229\_0 CP025874,CP025901,CP025923,CP052639,KP063541,KY271397,LR559891,MG589387,MK416015,OK490394,OK490396,OK490398,OK490400,OK490402,OK490404,OK490406,OK490412,OK490414,OK490422,OK490424,OK490426,OK490428,OK490432,OK490435,OK490437,OK490440,OK490443,OK490446,OK490449,OK490453,OK490456,OK490459  
VC\_23\_0 AY133112,FN297812,JX556417  
VC\_230\_0 JQ780327,MKS524177,OL964755  
VC\_230\_1 HM208537  
VC\_231\_0 MT366580,MZ496293,OP121182  
VC\_232\_0 AF065411,AF301375  
VC\_233\_0 MH674343,MN737622  
VC\_234\_0 AP018469,AP018470,AP018471,JN831653,KJ944841,KT361920,KX621007,KY087992,MFI40402,MFI40435,MH051258,MH926058,MK224497,MK524485,MK524488,MN369761,MN945904,MT310882,MW601218,ONS26978,ON645342  
VC\_236\_0 HM152764,HM152767,JF704105,JF704106,JN185608,JN643714,KJ567045,KM677211,KX585253,KX641264,KX657794,KX657795,KX657796,KY380102,MFI40412,MFI40428,MFI40430,MF377440,MF472892,MF668267,MF919532,MG962364,MG962371,MH001453,MH051246,MH077577,MH371113,MH509444,MH513977,MH536821,MH536822,MH697578,MH727544,MK016503,MK112537,MK460247,MN234182,MN234197,MN234198,MN234205,MN234230,MN234231,MN369742,MN369746,MN908692,MW712722,MW712723,MW712730,MW712733,MW712734,MW862979,MW862984,MW862985,MW862990,MZ005674,MZ355721,MZ648037,OK040778,OK040782,OK040784,OK310505,OM818330,OM913584,ON081329,ON081331,ON260816,ON456339,ON456353,ON526984,ON687735,ON687736,ON724013  
VC\_236\_1 MF140416,MN234165,MN234174,MN234201,MN234226  
VC\_237\_0 KF713486,MFI85722,MK310138,MK494119  
VC\_237\_1 JF937104,JX042579,KP027199,KR080206,KX683428,KY087993,MFI40398,MFI40406,MF324915,MF373841,MN234199,MT723940,MW601222  
VC\_237\_2 KY945355,MF324908,MF324909,MF324911,MF324912,MF324913,MF324914,MN234176,MN369762,MN945901,ON456351  
VC\_237\_3 MH910038,MH910039,MH910042,MK376955,MK460246,MN284895,MT310859,MT310860  
VC\_238\_0 JN243855,KJ567042,KM363596,KM923971,KX585251,KX636165,MFI85717,MFI85719,MFI85720,MG962374,MH051255,MH576966,MH651171,MH697592,MW435854,MZ322016,MZ958747  
VC\_24\_0 JX507079,MH142219,MH142220  
VC\_240\_0 MW314859,MW584165,MW584169,MW584207  
VC\_241\_0 MF975720,MT121966  
VC\_242\_0 KT588074,MK340941  
VC\_242\_1 KT630649,MK416007,MK416019,MK422455,MK433579,MK448230,MN098327,MN166823,MT135176,MT701587,MW057855,OK665842,OL791266,OM284015,OM621816,ON470579,ON470582,ON470588,ON470593,OP114732  
VC\_243\_0 MF695815,MK416014  
VC\_244\_0 KY271401,MK416017,OK490430,OK490433,OK490438,OK490441,OK490444,OK490447,OK490450,OK490451,OK490454,OK490458  
VC\_245\_0 KY653119,LN997803,LR597642,ON470580,ON470583,ON470586,ON470600,ON470607,ON470612,ON470621  
VC\_246\_0 AY583234,AY583235,AY583236  
VC\_247\_0 AF234172,AF234173,AF503408,FO818745,KU760857,MH160767,MH422554,MH445380,MH445381,MZ188976,ON018986,ON470615,ON470617,OP279344  
VC\_247\_1 MF356679



VC\_248\_0 HQ316581,MG592412,MG592507,MG592513,MG592524,MG592527,MG592588,MG592589,MG592669,MG592670,MZ568828  
VC\_249\_0 ON170062,ON170209,ON170231,ON170302,ON170328  
VC\_25\_0 ON170017,ON170042,ON170051,ON170056,ON170060,ON170066,ON170072,ON170166,ON170169,ON170274,ON170278,ON170357  
VC\_251\_0 AF232233,JX495041,JX495042,JX495043,LN898172,MH719189,MH719190,MH719191,MH719192,MH719193,MH719194,MH719195,MK511057,MK511058,MK511059,MK511060,MK511061,MK511063,MK511064,MK511065,MK934841,MN536027  
AF085222,AF115102,AF115103,AF145054,FJ226310,KT717083,KT717084,KT717085,KY705251,KY705256,KY705257,KY705259,KY705260,KY705261,KY705262,KY705263,KY705264,KY705265,KY705266,KY705267,KY705270,KY705271,KY705272,KY705273,KY705274,KY705275,KY705276,KY705282,KY705283,KY705284,KY705287,KY705288,KY705289,KY705290,MF161328,MF580759,MF580760,MF580761,MF580762,MF580763,MF580764,MF580765,MF580766,MF580767,MF580768,MF580769,MF580770,MF580771,MF580772,MF580773,MF580774,MF580775,MG708273,MG708274,MG708275,MH000602,MH000603,MH000604,MH375594,MH375595,MH375596,MH375597,MH375598,MH375599,MH375600,MH892351,MH892352,MH892353,MH892354,MH892356,MH892357,MH892358,MH892359,MH892360,MH892361,MH892375,MH892377,MH892378,MH892379,MH892380,MH892381,MH892382,MH937458,MH937459,MH937461,MH937462,MH937465,MH937466,MH937467,MH937468,MH937469,MH937470,MH937471,MH937472,MH937474,MH937477,MH937480,MH937481,MH937482,MH937483,MH937485,MH937486,MH937487,MH937488,MH937489,MH937490,MH937491,MH937492,MH937493,MH937495,MH937496,MH937497,MH937499,MH937500,MH937501,MH937504,MH937506,MH937508,MH937661,MH937662,MZ090946  
VC\_252\_0 MK448899  
VC\_253\_0 AF158600,AY699705,EP529515,FJ226752,HE861935,HG380752,HG424323,KY705258,KY705268,KY705269,KY705277,KY705278,KY705279,KY705280,KY705281,KY705285,KY705286,MH375593,MH892362,MH892363,MH892364,MH892366,MH892376,MH892383,MH892384,MH892385,MH937457,MH937460,MH937463,MH937464,MH937473,MH937475,MH937476,MH937478,MH937479,MH937484,MH937494,MH937498,MH937502,MH937503,MH937505,MH937507,MH937509,MH937510,MH937511,U88974  
VC\_254\_0 KU678389,KU678390,KU678391,KU678392,KX879641,KX879642,MH892350,MH892365,MH892368,MH892369,MH892370,MH892371,MH892372,MH892374  
VC\_256\_0 MK448824,MK449002,MK449003  
VC\_259\_0 AY714348,JN848801,MN200777,MN200778  
VC\_26\_0 AF176025,AF323669,AF489521,AJ245616,LT985568,LT985571,LT993224,MN534316,MN534317,MN689509,MN689516,MN689521,MN689530  
VC\_260\_0 KX160204,KX160219,KX160220,KX456211,MN534320  
VC\_262\_0 AF323668,LT985569,LT985574,LT985578,LT985583,LT993229,LT996082  
VC\_263\_0 DQ394807,DQ394808,DQ394809,DQ394810,KX456206,KX456208,KX456209,KX456210,KX456213,LT985575,LT985576,LT996081  
VC\_265\_0 GQ452243,KT945994  
VC\_267\_0 JX564242,JX567312,KX160206,KX160209,KX160210,KX160211,MN552144  
VC\_268\_0 KJ608189,KU981050,KY744240  
VC\_269\_0 AB063393,GQ403789  
VC\_27\_0 AJ251789,AP018361,AY131267,AY605066,EU246945,KC171646,KC171647,MF999224,MH983004,MN830258,MT956952  
VC\_272\_0 AJ421943,MH220877  
VC\_274\_0 AF133242,AJ969242  
VC\_276\_0 AF155037,MG966533,MK424903  
VC\_277\_0 AY029185,AY526908,AY526909  
VC\_278\_0 AY605181,MH128984  
VC\_279\_0 MW722521,MW790496  
VC\_28\_0 AB102868,AB362338,AB426868,AF217253,AF527608,AY052766,BK000583,CP051272,CP051278,CP051279,CP051285,CP051288,DQ003260,EU570103,FJ000341,GQ422450,GQ422451,GU573886,JF900176,JQ806763,KR296686,KR296687,KR296688,KU878967,KU927491,KU927492,KU927494,KU927495,KU927496,KU927498,KX776161,LC730322,LT7174109,MF188997,MG407615,MG969415,MH370387,MK770414,MK770415,MK972685,MK972686,MK972687,MK972692,MK972693,MK972694,MN161573,MT774487,MT932212,MW013502,MW013503,MW355480,OP265889,OP377721  
VC\_280\_0 GQ421471,MT084350  
VC\_281\_0 MK733262,MK733263,MK733264  
VC\_283\_0 MN508614,MN508618  
VC\_283\_1 MZ502379  
VC\_283\_10 AP011113  
VC\_283\_100 MT515752,MT526905  
VC\_283\_101 LR597660  
VC\_283\_102 OK570375  
VC\_283\_103 QN528735  
VC\_283\_104 OL310488  
VC\_283\_105 MZ234013  
VC\_283\_106 MZ753803  
VC\_283\_107 QN528739  
VC\_283\_108 OK148441  
VC\_283\_109 KY608967,OK275722  
VC\_283\_11 QN528741  
VC\_283\_110 MN508616,MN508617  
VC\_283\_111 KY290975  
VC\_283\_112 OL870317  
VC\_283\_113 LR215724  
VC\_283\_114 KX130861  
VC\_283\_115 JN986846  
VC\_283\_116 MZ501089  
VC\_283\_117 MZ234031,MZ234035,MZ234038  
VC\_283\_118 MZ501113,OL741432,OL870316  
VC\_283\_119 MK327939  
VC\_283\_12 MK373785  
VC\_283\_120 MK962752  
VC\_283\_121 MK327940,MK327945  
VC\_283\_122 OK274152  
VC\_283\_123 OL362041  
VC\_283\_124 MK373779  
VC\_283\_125 KX130862  
VC\_283\_126 OM386666  
VC\_283\_127 MK327929  
VC\_283\_128 OK076929  
VC\_283\_129 MH992510  
VC\_283\_13 QN528745  
VC\_283\_130 MN022785  
VC\_283\_131 MN716856  
VC\_283\_132 QN528740  
VC\_283\_133 MK327936  
VC\_283\_134 MK327944  
VC\_283\_135 OP168898



|            |                            |
|------------|----------------------------|
| VC_283_136 | MT515753,MT515755          |
| VC_283_137 | LR597657                   |
| VC_283_138 | MG867727                   |
| VC_283_139 | KX009778                   |
| VC_283_14  | MF001360                   |
| VC_283_140 | OV876900,OV877085          |
| VC_283_141 | LR746311                   |
| VC_283_142 | ONS28726,ONS28744          |
| VC_283_143 | KX452698                   |
| VC_283_144 | MW341595                   |
| VC_283_145 | KM501444                   |
| VC_283_146 | ONS28746                   |
| VC_283_147 | MZ501096                   |
| VC_283_148 | JN202312                   |
| VC_283_149 | ONS28736                   |
| VC_283_15  | LC465543                   |
| VC_283_150 | MZ065353                   |
| VC_283_151 | MH051915                   |
| VC_283_152 | OL960580                   |
| VC_283_153 | MW749000                   |
| VC_283_154 | HM035025                   |
| VC_283_155 | MT630408,MZ681930          |
| VC_283_156 | MK327942                   |
| VC_283_157 | OL960581                   |
| VC_283_158 | MF327007                   |
| VC_283_159 | MH837626                   |
| VC_283_16  | MK327937                   |
| VC_283_160 | QN229909                   |
| VC_283_161 | MT179807                   |
| VC_283_162 | QN720975                   |
| VC_283_163 | KP925357,KR233165          |
| VC_283_164 | MK886800,MZ502380          |
| VC_283_165 | OK018184                   |
| VC_283_166 | MZ189262                   |
| VC_283_167 | OM135583                   |
| VC_283_168 | MW822007                   |
| VC_283_169 | MK962750                   |
| VC_283_17  | MK327946                   |
| VC_283_170 | MH051916                   |
| VC_283_171 | MT682709                   |
| VC_283_172 | MW883059                   |
| VC_283_173 | MT968995                   |
| VC_283_174 | MZ417521                   |
| VC_283_175 | MW822011                   |
| VC_283_176 | MZ150757                   |
| VC_283_177 | OL770073                   |
| VC_283_178 | ON645936                   |
| VC_283_179 | MN580668                   |
| VC_283_18  | MK327928                   |
| VC_283_180 | MT515756                   |
| VC_283_181 | MH243439                   |
| VC_283_182 | LC348379                   |
| VC_283_183 | MF001359                   |
| VC_283_184 | MT884006,MT884007          |
| VC_283_185 | MN994497                   |
| VC_283_186 | ONS28742                   |
| VC_283_187 | AP018932                   |
| VC_283_188 | MH992121                   |
| VC_283_189 | MF158046                   |
| VC_283_19  | MF327008                   |
| VC_283_190 | MK977694                   |
| VC_283_2   | HM997020,KP869105          |
| VC_283_20  | MF327009                   |
| VC_283_21  | MN781580                   |
| VC_283_22  | OP197928                   |
| VC_283_23  | MT828552                   |
| VC_283_24  | MG775043                   |
| VC_283_25  | KU867876                   |
| VC_283_26  | OL615012                   |
| VC_283_27  | MT176424                   |
| VC_283_28  | MT176426                   |
| VC_283_29  | ONS28727                   |
| VC_283_3   | FJ839693,KM607004,OK040907 |
| VC_283_30  | ONS28728                   |
| VC_283_31  | MN895437                   |
| VC_283_32  | MZ436830                   |



|           |                                                                                                                                                                                     |
|-----------|-------------------------------------------------------------------------------------------------------------------------------------------------------------------------------------|
| VC_283_33 | LN881726,LN881729,LN881734,LN881737                                                                                                                                                 |
| VC_283_34 | MH809535,MT515751,MT828551,MT828553                                                                                                                                                 |
| VC_283_35 | MK962755                                                                                                                                                                            |
| VC_283_36 | MZ501065                                                                                                                                                                            |
| VC_283_37 | LN881732                                                                                                                                                                            |
| VC_283_38 | LR990704                                                                                                                                                                            |
| VC_283_39 | MN895434                                                                                                                                                                            |
| VC_283_4  | MZ291552,OP555980,OP555981,OP555982,OP572230                                                                                                                                        |
| VC_283_40 | MZ234018                                                                                                                                                                            |
| VC_283_41 | MZ501046                                                                                                                                                                            |
| VC_283_42 | MZ501050                                                                                                                                                                            |
| VC_283_43 | MK373786                                                                                                                                                                            |
| VC_283_44 | MN895438                                                                                                                                                                            |
| VC_283_45 | MH355584                                                                                                                                                                            |
| VC_283_46 | MZ501066                                                                                                                                                                            |
| VC_283_47 | MZ501067                                                                                                                                                                            |
| VC_283_48 | MN895436                                                                                                                                                                            |
| VC_283_49 | MT176425                                                                                                                                                                            |
| VC_283_5  | LC620505                                                                                                                                                                            |
| VC_283_50 | MZ501106                                                                                                                                                                            |
| VC_283_51 | MN895435                                                                                                                                                                            |
| VC_283_52 | MH553563                                                                                                                                                                            |
| VC_283_53 | MK373781                                                                                                                                                                            |
| VC_283_54 | MT682713                                                                                                                                                                            |
| VC_283_55 | ONS28743                                                                                                                                                                            |
| VC_283_56 | MZ2726795                                                                                                                                                                           |
| VC_283_57 | KT184311                                                                                                                                                                            |
| VC_283_58 | KX130864                                                                                                                                                                            |
| VC_283_59 | OK272473                                                                                                                                                                            |
| VC_283_6  | ON782582                                                                                                                                                                            |
| VC_283_60 | OK272476                                                                                                                                                                            |
| VC_283_61 | MT446387                                                                                                                                                                            |
| VC_283_62 | OK272484                                                                                                                                                                            |
| VC_283_63 | KT184312                                                                                                                                                                            |
| VC_283_64 | MF158045                                                                                                                                                                            |
| VC_283_65 | OL956808                                                                                                                                                                            |
| VC_283_66 | KT184308                                                                                                                                                                            |
| VC_283_67 | LR877332,MT515754                                                                                                                                                                   |
| VC_283_68 | MW749001                                                                                                                                                                            |
| VC_283_69 | HE956711                                                                                                                                                                            |
| VC_283_7  | MW286157                                                                                                                                                                            |
| VC_283_70 | MZ501098                                                                                                                                                                            |
| VC_283_71 | LR215723                                                                                                                                                                            |
| VC_283_72 | MT682710                                                                                                                                                                            |
| VC_283_73 | LN881728,LN881733,LN881736                                                                                                                                                          |
| VC_283_74 | MT682714                                                                                                                                                                            |
| VC_283_75 | MZ170040                                                                                                                                                                            |
| VC_283_76 | MK373787                                                                                                                                                                            |
| VC_283_77 | MT682712,MZ170041                                                                                                                                                                   |
| VC_283_78 | MZ234027,MZ234030,MZ234034,MZ234036,MZ234037,MZ234039,MZ234040,MZ234041,MZ234042,MZ234043,MZ234051,MZ234052,MZ234053                                                                |
| VC_283_79 | MF001354                                                                                                                                                                            |
| VC_283_8  | KU925172                                                                                                                                                                            |
| VC_283_80 | MT764206                                                                                                                                                                            |
| VC_283_81 | KR269718                                                                                                                                                                            |
| VC_283_82 | KM606994,KM606995,KM606996,KM606997,KM606998,KM606999                                                                                                                               |
| VC_283_83 | KM607000                                                                                                                                                                            |
| VC_283_84 | FJ839692                                                                                                                                                                            |
| VC_283_85 | KX828711                                                                                                                                                                            |
| VC_283_86 | ONS28734                                                                                                                                                                            |
| VC_283_87 | ONS28738                                                                                                                                                                            |
| VC_283_88 | AP018814,MH550421                                                                                                                                                                   |
| VC_283_89 | MG781190,MG781191                                                                                                                                                                   |
| VC_283_9  | MZ501052                                                                                                                                                                            |
| VC_283_90 | KF208315                                                                                                                                                                            |
| VC_283_91 | AF158101,HM137666,KJ477684,KJ477685,KJ477686,KM607002,KM607003,MT984581,MZ375356,OL964735,OL964745                                                                                  |
| VC_283_92 | AP018813,LC348380,MH751506,OM339528                                                                                                                                                 |
| VC_283_93 | MT932213                                                                                                                                                                            |
| VC_283_94 | DQ904452,KM607001                                                                                                                                                                   |
| VC_283_95 | JX128259                                                                                                                                                                            |
| VC_283_96 | ONS06924                                                                                                                                                                            |
| VC_283_97 | LR215722                                                                                                                                                                            |
| VC_283_98 | ONS210139                                                                                                                                                                           |
| VC_283_99 | KJ668714                                                                                                                                                                            |
| VC_284_0  | KJ025957,MN095771,OM457001                                                                                                                                                          |
| VC_286_0  | MW512264,MZ501047                                                                                                                                                                   |
| VC_286_1  | KR422352,LR027383,LR027387,LR027390,LR027391,MH243438,MK327934,MK327943,MK373778,MK373782,MK373784,MK962754,MK962756,MK962757,MN850579,MN850590,MZ234025,OL960576,OL960577,OM960734 |



|           |                                                                                                                                                                                                                                                                                                                                                                                                                                                                                                                                                                                                                                                                                                                                                                                                                                                                                                                                                                                                                                                                                                                                                                                                                                                                                                                                                                                                                                                                                                                                                                                                                                                                                                                                                                                                                                                                                                                                                                                                                                                                                                                                                                                                                                                                                                                                                                                                                                                                                                                                                                                                                                                                                                                                                                                                                                                                                                                                                                                                                                                                                                                                                                                                                                                                                                                                                                                                                                                                                                                                                                                                                                                                                                                                                                                                                                                                                                                                                                                                                                                                                                                                                                                                                                                                                                                                                                                                                                                                                                                                                                                                                                                                                                                                                                                                                                                                                                                                                                                                                                                                                                                                                                                                                                                                                                                                                                                                                                                                                                                                                                                                                                                                                                                                                                                                                                                                                                                                                                                                                                                                                                                                                                                                                                                                                                                                                                                                                                                                                                                                                                                                                                                                                                                                                                                                                                                                                                                                                                                                                                                                                                                                                                                                                                                                                                                                                                                                                                                                                                                                                                                                                                                                                                                                                                                                                                                                                                                                                                                                                                                                                                                                                                                                                                                                                                                                                                                                                                                                                                                                                                                                                                                                                                                                                                                                                                                                                                                                                                                                                                                                                                                                                                                                                                                                                                                                                                                                                                                                                                                                                                                                                                                                                                                                                                                                                                                                                                                                                                                                                                                                                                                                                                                                                                                                                                                                                                                                                                                                                                                                                                                                                                                                                                                                                                                                                                                           |
|-----------|-----------------------------------------------------------------------------------------------------------------------------------------------------------------------------------------------------------------------------------------------------------------------------------------------------------------------------------------------------------------------------------------------------------------------------------------------------------------------------------------------------------------------------------------------------------------------------------------------------------------------------------------------------------------------------------------------------------------------------------------------------------------------------------------------------------------------------------------------------------------------------------------------------------------------------------------------------------------------------------------------------------------------------------------------------------------------------------------------------------------------------------------------------------------------------------------------------------------------------------------------------------------------------------------------------------------------------------------------------------------------------------------------------------------------------------------------------------------------------------------------------------------------------------------------------------------------------------------------------------------------------------------------------------------------------------------------------------------------------------------------------------------------------------------------------------------------------------------------------------------------------------------------------------------------------------------------------------------------------------------------------------------------------------------------------------------------------------------------------------------------------------------------------------------------------------------------------------------------------------------------------------------------------------------------------------------------------------------------------------------------------------------------------------------------------------------------------------------------------------------------------------------------------------------------------------------------------------------------------------------------------------------------------------------------------------------------------------------------------------------------------------------------------------------------------------------------------------------------------------------------------------------------------------------------------------------------------------------------------------------------------------------------------------------------------------------------------------------------------------------------------------------------------------------------------------------------------------------------------------------------------------------------------------------------------------------------------------------------------------------------------------------------------------------------------------------------------------------------------------------------------------------------------------------------------------------------------------------------------------------------------------------------------------------------------------------------------------------------------------------------------------------------------------------------------------------------------------------------------------------------------------------------------------------------------------------------------------------------------------------------------------------------------------------------------------------------------------------------------------------------------------------------------------------------------------------------------------------------------------------------------------------------------------------------------------------------------------------------------------------------------------------------------------------------------------------------------------------------------------------------------------------------------------------------------------------------------------------------------------------------------------------------------------------------------------------------------------------------------------------------------------------------------------------------------------------------------------------------------------------------------------------------------------------------------------------------------------------------------------------------------------------------------------------------------------------------------------------------------------------------------------------------------------------------------------------------------------------------------------------------------------------------------------------------------------------------------------------------------------------------------------------------------------------------------------------------------------------------------------------------------------------------------------------------------------------------------------------------------------------------------------------------------------------------------------------------------------------------------------------------------------------------------------------------------------------------------------------------------------------------------------------------------------------------------------------------------------------------------------------------------------------------------------------------------------------------------------------------------------------------------------------------------------------------------------------------------------------------------------------------------------------------------------------------------------------------------------------------------------------------------------------------------------------------------------------------------------------------------------------------------------------------------------------------------------------------------------------------------------------------------------------------------------------------------------------------------------------------------------------------------------------------------------------------------------------------------------------------------------------------------------------------------------------------------------------------------------------------------------------------------------------------------------------------------------------------------------------------------------------------------------------------------------------------------------------------------------------------------------------------------------------------------------------------------------------------------------------------------------------------------------------------------------------------------------------------------------------------------------------------------------------------------------------------------------------------------------------------------------------------------------------------------------------------------------------------------------------------------------------------------------------------------------------------------------------------------------------------------------------------------------------------------------------------------------------------------------------------------------------------------------------------------------------------------------------------------------------------------------------------------------------------------------------------------------------------------------------------------------------------------------------------------------------------------------------------------------------------------------------------------------------------------------------------------------------------------------------------------------------------------------------------------------------------------------------------------------------------------------------------------------------------------------------------------------------------------------------------------------------------------------------------------------------------------------------------------------------------------------------------------------------------------------------------------------------------------------------------------------------------------------------------------------------------------------------------------------------------------------------------------------------------------------------------------------------------------------------------------------------------------------------------------------------------------------------------------------------------------------------------------------------------------------------------------------------------------------------------------------------------------------------------------------------------------------------------------------------------------------------------------------------------------------------------------------------------------------------------------------------------------------------------------------------------------------------------------------------------------------------------------------------------------------------------------------------------------------------------------------------------------------------------------------------------------------------------------------------------------------------------------------------------------------------------------------------------------------------------------------------------------------------------------------------------------------------------------------------------------------------------------------------------------------------------------------------------------------------------------------------------------------------------------------------------------------------------------------------------------------------------------------------------------------------------------------------------------------------------------------------------------------------------------------------------------------------------------------------------------------|
| VC_286_10 | AY303349,KF562341,KM407600,KY703222,MH992122,MT446390,MZ501056,OM982647,ON528737                                                                                                                                                                                                                                                                                                                                                                                                                                                                                                                                                                                                                                                                                                                                                                                                                                                                                                                                                                                                                                                                                                                                                                                                                                                                                                                                                                                                                                                                                                                                                                                                                                                                                                                                                                                                                                                                                                                                                                                                                                                                                                                                                                                                                                                                                                                                                                                                                                                                                                                                                                                                                                                                                                                                                                                                                                                                                                                                                                                                                                                                                                                                                                                                                                                                                                                                                                                                                                                                                                                                                                                                                                                                                                                                                                                                                                                                                                                                                                                                                                                                                                                                                                                                                                                                                                                                                                                                                                                                                                                                                                                                                                                                                                                                                                                                                                                                                                                                                                                                                                                                                                                                                                                                                                                                                                                                                                                                                                                                                                                                                                                                                                                                                                                                                                                                                                                                                                                                                                                                                                                                                                                                                                                                                                                                                                                                                                                                                                                                                                                                                                                                                                                                                                                                                                                                                                                                                                                                                                                                                                                                                                                                                                                                                                                                                                                                                                                                                                                                                                                                                                                                                                                                                                                                                                                                                                                                                                                                                                                                                                                                                                                                                                                                                                                                                                                                                                                                                                                                                                                                                                                                                                                                                                                                                                                                                                                                                                                                                                                                                                                                                                                                                                                                                                                                                                                                                                                                                                                                                                                                                                                                                                                                                                                                                                                                                                                                                                                                                                                                                                                                                                                                                                                                                                                                                                                                                                                                                                                                                                                                                                                                                                                                                                                                                                          |
| VC_286_11 | MH359124,MK524178,MW882907                                                                                                                                                                                                                                                                                                                                                                                                                                                                                                                                                                                                                                                                                                                                                                                                                                                                                                                                                                                                                                                                                                                                                                                                                                                                                                                                                                                                                                                                                                                                                                                                                                                                                                                                                                                                                                                                                                                                                                                                                                                                                                                                                                                                                                                                                                                                                                                                                                                                                                                                                                                                                                                                                                                                                                                                                                                                                                                                                                                                                                                                                                                                                                                                                                                                                                                                                                                                                                                                                                                                                                                                                                                                                                                                                                                                                                                                                                                                                                                                                                                                                                                                                                                                                                                                                                                                                                                                                                                                                                                                                                                                                                                                                                                                                                                                                                                                                                                                                                                                                                                                                                                                                                                                                                                                                                                                                                                                                                                                                                                                                                                                                                                                                                                                                                                                                                                                                                                                                                                                                                                                                                                                                                                                                                                                                                                                                                                                                                                                                                                                                                                                                                                                                                                                                                                                                                                                                                                                                                                                                                                                                                                                                                                                                                                                                                                                                                                                                                                                                                                                                                                                                                                                                                                                                                                                                                                                                                                                                                                                                                                                                                                                                                                                                                                                                                                                                                                                                                                                                                                                                                                                                                                                                                                                                                                                                                                                                                                                                                                                                                                                                                                                                                                                                                                                                                                                                                                                                                                                                                                                                                                                                                                                                                                                                                                                                                                                                                                                                                                                                                                                                                                                                                                                                                                                                                                                                                                                                                                                                                                                                                                                                                                                                                                                                                                                                                |
| VC_286_12 | MG589383,MZ189261,OL770074                                                                                                                                                                                                                                                                                                                                                                                                                                                                                                                                                                                                                                                                                                                                                                                                                                                                                                                                                                                                                                                                                                                                                                                                                                                                                                                                                                                                                                                                                                                                                                                                                                                                                                                                                                                                                                                                                                                                                                                                                                                                                                                                                                                                                                                                                                                                                                                                                                                                                                                                                                                                                                                                                                                                                                                                                                                                                                                                                                                                                                                                                                                                                                                                                                                                                                                                                                                                                                                                                                                                                                                                                                                                                                                                                                                                                                                                                                                                                                                                                                                                                                                                                                                                                                                                                                                                                                                                                                                                                                                                                                                                                                                                                                                                                                                                                                                                                                                                                                                                                                                                                                                                                                                                                                                                                                                                                                                                                                                                                                                                                                                                                                                                                                                                                                                                                                                                                                                                                                                                                                                                                                                                                                                                                                                                                                                                                                                                                                                                                                                                                                                                                                                                                                                                                                                                                                                                                                                                                                                                                                                                                                                                                                                                                                                                                                                                                                                                                                                                                                                                                                                                                                                                                                                                                                                                                                                                                                                                                                                                                                                                                                                                                                                                                                                                                                                                                                                                                                                                                                                                                                                                                                                                                                                                                                                                                                                                                                                                                                                                                                                                                                                                                                                                                                                                                                                                                                                                                                                                                                                                                                                                                                                                                                                                                                                                                                                                                                                                                                                                                                                                                                                                                                                                                                                                                                                                                                                                                                                                                                                                                                                                                                                                                                                                                                                                                                |
| VC_286_13 | KF582788,MF044457,MK639187,MT782071,MW630116,MZ311865,MZ560701,MZ868638,OV754623,OV877511                                                                                                                                                                                                                                                                                                                                                                                                                                                                                                                                                                                                                                                                                                                                                                                                                                                                                                                                                                                                                                                                                                                                                                                                                                                                                                                                                                                                                                                                                                                                                                                                                                                                                                                                                                                                                                                                                                                                                                                                                                                                                                                                                                                                                                                                                                                                                                                                                                                                                                                                                                                                                                                                                                                                                                                                                                                                                                                                                                                                                                                                                                                                                                                                                                                                                                                                                                                                                                                                                                                                                                                                                                                                                                                                                                                                                                                                                                                                                                                                                                                                                                                                                                                                                                                                                                                                                                                                                                                                                                                                                                                                                                                                                                                                                                                                                                                                                                                                                                                                                                                                                                                                                                                                                                                                                                                                                                                                                                                                                                                                                                                                                                                                                                                                                                                                                                                                                                                                                                                                                                                                                                                                                                                                                                                                                                                                                                                                                                                                                                                                                                                                                                                                                                                                                                                                                                                                                                                                                                                                                                                                                                                                                                                                                                                                                                                                                                                                                                                                                                                                                                                                                                                                                                                                                                                                                                                                                                                                                                                                                                                                                                                                                                                                                                                                                                                                                                                                                                                                                                                                                                                                                                                                                                                                                                                                                                                                                                                                                                                                                                                                                                                                                                                                                                                                                                                                                                                                                                                                                                                                                                                                                                                                                                                                                                                                                                                                                                                                                                                                                                                                                                                                                                                                                                                                                                                                                                                                                                                                                                                                                                                                                                                                                                                                                                 |
| VC_286_14 | IX536493                                                                                                                                                                                                                                                                                                                                                                                                                                                                                                                                                                                                                                                                                                                                                                                                                                                                                                                                                                                                                                                                                                                                                                                                                                                                                                                                                                                                                                                                                                                                                                                                                                                                                                                                                                                                                                                                                                                                                                                                                                                                                                                                                                                                                                                                                                                                                                                                                                                                                                                                                                                                                                                                                                                                                                                                                                                                                                                                                                                                                                                                                                                                                                                                                                                                                                                                                                                                                                                                                                                                                                                                                                                                                                                                                                                                                                                                                                                                                                                                                                                                                                                                                                                                                                                                                                                                                                                                                                                                                                                                                                                                                                                                                                                                                                                                                                                                                                                                                                                                                                                                                                                                                                                                                                                                                                                                                                                                                                                                                                                                                                                                                                                                                                                                                                                                                                                                                                                                                                                                                                                                                                                                                                                                                                                                                                                                                                                                                                                                                                                                                                                                                                                                                                                                                                                                                                                                                                                                                                                                                                                                                                                                                                                                                                                                                                                                                                                                                                                                                                                                                                                                                                                                                                                                                                                                                                                                                                                                                                                                                                                                                                                                                                                                                                                                                                                                                                                                                                                                                                                                                                                                                                                                                                                                                                                                                                                                                                                                                                                                                                                                                                                                                                                                                                                                                                                                                                                                                                                                                                                                                                                                                                                                                                                                                                                                                                                                                                                                                                                                                                                                                                                                                                                                                                                                                                                                                                                                                                                                                                                                                                                                                                                                                                                                                                                                                                                  |
| VC_286_15 | MK047717,ONS28725                                                                                                                                                                                                                                                                                                                                                                                                                                                                                                                                                                                                                                                                                                                                                                                                                                                                                                                                                                                                                                                                                                                                                                                                                                                                                                                                                                                                                                                                                                                                                                                                                                                                                                                                                                                                                                                                                                                                                                                                                                                                                                                                                                                                                                                                                                                                                                                                                                                                                                                                                                                                                                                                                                                                                                                                                                                                                                                                                                                                                                                                                                                                                                                                                                                                                                                                                                                                                                                                                                                                                                                                                                                                                                                                                                                                                                                                                                                                                                                                                                                                                                                                                                                                                                                                                                                                                                                                                                                                                                                                                                                                                                                                                                                                                                                                                                                                                                                                                                                                                                                                                                                                                                                                                                                                                                                                                                                                                                                                                                                                                                                                                                                                                                                                                                                                                                                                                                                                                                                                                                                                                                                                                                                                                                                                                                                                                                                                                                                                                                                                                                                                                                                                                                                                                                                                                                                                                                                                                                                                                                                                                                                                                                                                                                                                                                                                                                                                                                                                                                                                                                                                                                                                                                                                                                                                                                                                                                                                                                                                                                                                                                                                                                                                                                                                                                                                                                                                                                                                                                                                                                                                                                                                                                                                                                                                                                                                                                                                                                                                                                                                                                                                                                                                                                                                                                                                                                                                                                                                                                                                                                                                                                                                                                                                                                                                                                                                                                                                                                                                                                                                                                                                                                                                                                                                                                                                                                                                                                                                                                                                                                                                                                                                                                                                                                                                                                         |
| VC_286_16 | KX130865                                                                                                                                                                                                                                                                                                                                                                                                                                                                                                                                                                                                                                                                                                                                                                                                                                                                                                                                                                                                                                                                                                                                                                                                                                                                                                                                                                                                                                                                                                                                                                                                                                                                                                                                                                                                                                                                                                                                                                                                                                                                                                                                                                                                                                                                                                                                                                                                                                                                                                                                                                                                                                                                                                                                                                                                                                                                                                                                                                                                                                                                                                                                                                                                                                                                                                                                                                                                                                                                                                                                                                                                                                                                                                                                                                                                                                                                                                                                                                                                                                                                                                                                                                                                                                                                                                                                                                                                                                                                                                                                                                                                                                                                                                                                                                                                                                                                                                                                                                                                                                                                                                                                                                                                                                                                                                                                                                                                                                                                                                                                                                                                                                                                                                                                                                                                                                                                                                                                                                                                                                                                                                                                                                                                                                                                                                                                                                                                                                                                                                                                                                                                                                                                                                                                                                                                                                                                                                                                                                                                                                                                                                                                                                                                                                                                                                                                                                                                                                                                                                                                                                                                                                                                                                                                                                                                                                                                                                                                                                                                                                                                                                                                                                                                                                                                                                                                                                                                                                                                                                                                                                                                                                                                                                                                                                                                                                                                                                                                                                                                                                                                                                                                                                                                                                                                                                                                                                                                                                                                                                                                                                                                                                                                                                                                                                                                                                                                                                                                                                                                                                                                                                                                                                                                                                                                                                                                                                                                                                                                                                                                                                                                                                                                                                                                                                                                                                                  |
| VC_286_17 | KP869101,KP869104,KP869111,KT184309,KT184310,MK047718,MN648445,MN850622                                                                                                                                                                                                                                                                                                                                                                                                                                                                                                                                                                                                                                                                                                                                                                                                                                                                                                                                                                                                                                                                                                                                                                                                                                                                                                                                                                                                                                                                                                                                                                                                                                                                                                                                                                                                                                                                                                                                                                                                                                                                                                                                                                                                                                                                                                                                                                                                                                                                                                                                                                                                                                                                                                                                                                                                                                                                                                                                                                                                                                                                                                                                                                                                                                                                                                                                                                                                                                                                                                                                                                                                                                                                                                                                                                                                                                                                                                                                                                                                                                                                                                                                                                                                                                                                                                                                                                                                                                                                                                                                                                                                                                                                                                                                                                                                                                                                                                                                                                                                                                                                                                                                                                                                                                                                                                                                                                                                                                                                                                                                                                                                                                                                                                                                                                                                                                                                                                                                                                                                                                                                                                                                                                                                                                                                                                                                                                                                                                                                                                                                                                                                                                                                                                                                                                                                                                                                                                                                                                                                                                                                                                                                                                                                                                                                                                                                                                                                                                                                                                                                                                                                                                                                                                                                                                                                                                                                                                                                                                                                                                                                                                                                                                                                                                                                                                                                                                                                                                                                                                                                                                                                                                                                                                                                                                                                                                                                                                                                                                                                                                                                                                                                                                                                                                                                                                                                                                                                                                                                                                                                                                                                                                                                                                                                                                                                                                                                                                                                                                                                                                                                                                                                                                                                                                                                                                                                                                                                                                                                                                                                                                                                                                                                                                                                                                                   |
| VC_286_2  | MN850651                                                                                                                                                                                                                                                                                                                                                                                                                                                                                                                                                                                                                                                                                                                                                                                                                                                                                                                                                                                                                                                                                                                                                                                                                                                                                                                                                                                                                                                                                                                                                                                                                                                                                                                                                                                                                                                                                                                                                                                                                                                                                                                                                                                                                                                                                                                                                                                                                                                                                                                                                                                                                                                                                                                                                                                                                                                                                                                                                                                                                                                                                                                                                                                                                                                                                                                                                                                                                                                                                                                                                                                                                                                                                                                                                                                                                                                                                                                                                                                                                                                                                                                                                                                                                                                                                                                                                                                                                                                                                                                                                                                                                                                                                                                                                                                                                                                                                                                                                                                                                                                                                                                                                                                                                                                                                                                                                                                                                                                                                                                                                                                                                                                                                                                                                                                                                                                                                                                                                                                                                                                                                                                                                                                                                                                                                                                                                                                                                                                                                                                                                                                                                                                                                                                                                                                                                                                                                                                                                                                                                                                                                                                                                                                                                                                                                                                                                                                                                                                                                                                                                                                                                                                                                                                                                                                                                                                                                                                                                                                                                                                                                                                                                                                                                                                                                                                                                                                                                                                                                                                                                                                                                                                                                                                                                                                                                                                                                                                                                                                                                                                                                                                                                                                                                                                                                                                                                                                                                                                                                                                                                                                                                                                                                                                                                                                                                                                                                                                                                                                                                                                                                                                                                                                                                                                                                                                                                                                                                                                                                                                                                                                                                                                                                                                                                                                                                                                  |
| VC_286_3  | MK373774,MK373775                                                                                                                                                                                                                                                                                                                                                                                                                                                                                                                                                                                                                                                                                                                                                                                                                                                                                                                                                                                                                                                                                                                                                                                                                                                                                                                                                                                                                                                                                                                                                                                                                                                                                                                                                                                                                                                                                                                                                                                                                                                                                                                                                                                                                                                                                                                                                                                                                                                                                                                                                                                                                                                                                                                                                                                                                                                                                                                                                                                                                                                                                                                                                                                                                                                                                                                                                                                                                                                                                                                                                                                                                                                                                                                                                                                                                                                                                                                                                                                                                                                                                                                                                                                                                                                                                                                                                                                                                                                                                                                                                                                                                                                                                                                                                                                                                                                                                                                                                                                                                                                                                                                                                                                                                                                                                                                                                                                                                                                                                                                                                                                                                                                                                                                                                                                                                                                                                                                                                                                                                                                                                                                                                                                                                                                                                                                                                                                                                                                                                                                                                                                                                                                                                                                                                                                                                                                                                                                                                                                                                                                                                                                                                                                                                                                                                                                                                                                                                                                                                                                                                                                                                                                                                                                                                                                                                                                                                                                                                                                                                                                                                                                                                                                                                                                                                                                                                                                                                                                                                                                                                                                                                                                                                                                                                                                                                                                                                                                                                                                                                                                                                                                                                                                                                                                                                                                                                                                                                                                                                                                                                                                                                                                                                                                                                                                                                                                                                                                                                                                                                                                                                                                                                                                                                                                                                                                                                                                                                                                                                                                                                                                                                                                                                                                                                                                                                                         |
| VC_286_4  | MK327933                                                                                                                                                                                                                                                                                                                                                                                                                                                                                                                                                                                                                                                                                                                                                                                                                                                                                                                                                                                                                                                                                                                                                                                                                                                                                                                                                                                                                                                                                                                                                                                                                                                                                                                                                                                                                                                                                                                                                                                                                                                                                                                                                                                                                                                                                                                                                                                                                                                                                                                                                                                                                                                                                                                                                                                                                                                                                                                                                                                                                                                                                                                                                                                                                                                                                                                                                                                                                                                                                                                                                                                                                                                                                                                                                                                                                                                                                                                                                                                                                                                                                                                                                                                                                                                                                                                                                                                                                                                                                                                                                                                                                                                                                                                                                                                                                                                                                                                                                                                                                                                                                                                                                                                                                                                                                                                                                                                                                                                                                                                                                                                                                                                                                                                                                                                                                                                                                                                                                                                                                                                                                                                                                                                                                                                                                                                                                                                                                                                                                                                                                                                                                                                                                                                                                                                                                                                                                                                                                                                                                                                                                                                                                                                                                                                                                                                                                                                                                                                                                                                                                                                                                                                                                                                                                                                                                                                                                                                                                                                                                                                                                                                                                                                                                                                                                                                                                                                                                                                                                                                                                                                                                                                                                                                                                                                                                                                                                                                                                                                                                                                                                                                                                                                                                                                                                                                                                                                                                                                                                                                                                                                                                                                                                                                                                                                                                                                                                                                                                                                                                                                                                                                                                                                                                                                                                                                                                                                                                                                                                                                                                                                                                                                                                                                                                                                                                                                  |
| VC_286_5  | MT446423                                                                                                                                                                                                                                                                                                                                                                                                                                                                                                                                                                                                                                                                                                                                                                                                                                                                                                                                                                                                                                                                                                                                                                                                                                                                                                                                                                                                                                                                                                                                                                                                                                                                                                                                                                                                                                                                                                                                                                                                                                                                                                                                                                                                                                                                                                                                                                                                                                                                                                                                                                                                                                                                                                                                                                                                                                                                                                                                                                                                                                                                                                                                                                                                                                                                                                                                                                                                                                                                                                                                                                                                                                                                                                                                                                                                                                                                                                                                                                                                                                                                                                                                                                                                                                                                                                                                                                                                                                                                                                                                                                                                                                                                                                                                                                                                                                                                                                                                                                                                                                                                                                                                                                                                                                                                                                                                                                                                                                                                                                                                                                                                                                                                                                                                                                                                                                                                                                                                                                                                                                                                                                                                                                                                                                                                                                                                                                                                                                                                                                                                                                                                                                                                                                                                                                                                                                                                                                                                                                                                                                                                                                                                                                                                                                                                                                                                                                                                                                                                                                                                                                                                                                                                                                                                                                                                                                                                                                                                                                                                                                                                                                                                                                                                                                                                                                                                                                                                                                                                                                                                                                                                                                                                                                                                                                                                                                                                                                                                                                                                                                                                                                                                                                                                                                                                                                                                                                                                                                                                                                                                                                                                                                                                                                                                                                                                                                                                                                                                                                                                                                                                                                                                                                                                                                                                                                                                                                                                                                                                                                                                                                                                                                                                                                                                                                                                                                                  |
| VC_286_6  | MN864145                                                                                                                                                                                                                                                                                                                                                                                                                                                                                                                                                                                                                                                                                                                                                                                                                                                                                                                                                                                                                                                                                                                                                                                                                                                                                                                                                                                                                                                                                                                                                                                                                                                                                                                                                                                                                                                                                                                                                                                                                                                                                                                                                                                                                                                                                                                                                                                                                                                                                                                                                                                                                                                                                                                                                                                                                                                                                                                                                                                                                                                                                                                                                                                                                                                                                                                                                                                                                                                                                                                                                                                                                                                                                                                                                                                                                                                                                                                                                                                                                                                                                                                                                                                                                                                                                                                                                                                                                                                                                                                                                                                                                                                                                                                                                                                                                                                                                                                                                                                                                                                                                                                                                                                                                                                                                                                                                                                                                                                                                                                                                                                                                                                                                                                                                                                                                                                                                                                                                                                                                                                                                                                                                                                                                                                                                                                                                                                                                                                                                                                                                                                                                                                                                                                                                                                                                                                                                                                                                                                                                                                                                                                                                                                                                                                                                                                                                                                                                                                                                                                                                                                                                                                                                                                                                                                                                                                                                                                                                                                                                                                                                                                                                                                                                                                                                                                                                                                                                                                                                                                                                                                                                                                                                                                                                                                                                                                                                                                                                                                                                                                                                                                                                                                                                                                                                                                                                                                                                                                                                                                                                                                                                                                                                                                                                                                                                                                                                                                                                                                                                                                                                                                                                                                                                                                                                                                                                                                                                                                                                                                                                                                                                                                                                                                                                                                                                                                  |
| VC_286_7  | OM632671                                                                                                                                                                                                                                                                                                                                                                                                                                                                                                                                                                                                                                                                                                                                                                                                                                                                                                                                                                                                                                                                                                                                                                                                                                                                                                                                                                                                                                                                                                                                                                                                                                                                                                                                                                                                                                                                                                                                                                                                                                                                                                                                                                                                                                                                                                                                                                                                                                                                                                                                                                                                                                                                                                                                                                                                                                                                                                                                                                                                                                                                                                                                                                                                                                                                                                                                                                                                                                                                                                                                                                                                                                                                                                                                                                                                                                                                                                                                                                                                                                                                                                                                                                                                                                                                                                                                                                                                                                                                                                                                                                                                                                                                                                                                                                                                                                                                                                                                                                                                                                                                                                                                                                                                                                                                                                                                                                                                                                                                                                                                                                                                                                                                                                                                                                                                                                                                                                                                                                                                                                                                                                                                                                                                                                                                                                                                                                                                                                                                                                                                                                                                                                                                                                                                                                                                                                                                                                                                                                                                                                                                                                                                                                                                                                                                                                                                                                                                                                                                                                                                                                                                                                                                                                                                                                                                                                                                                                                                                                                                                                                                                                                                                                                                                                                                                                                                                                                                                                                                                                                                                                                                                                                                                                                                                                                                                                                                                                                                                                                                                                                                                                                                                                                                                                                                                                                                                                                                                                                                                                                                                                                                                                                                                                                                                                                                                                                                                                                                                                                                                                                                                                                                                                                                                                                                                                                                                                                                                                                                                                                                                                                                                                                                                                                                                                                                                                                  |
| VC_286_8  | KU255730                                                                                                                                                                                                                                                                                                                                                                                                                                                                                                                                                                                                                                                                                                                                                                                                                                                                                                                                                                                                                                                                                                                                                                                                                                                                                                                                                                                                                                                                                                                                                                                                                                                                                                                                                                                                                                                                                                                                                                                                                                                                                                                                                                                                                                                                                                                                                                                                                                                                                                                                                                                                                                                                                                                                                                                                                                                                                                                                                                                                                                                                                                                                                                                                                                                                                                                                                                                                                                                                                                                                                                                                                                                                                                                                                                                                                                                                                                                                                                                                                                                                                                                                                                                                                                                                                                                                                                                                                                                                                                                                                                                                                                                                                                                                                                                                                                                                                                                                                                                                                                                                                                                                                                                                                                                                                                                                                                                                                                                                                                                                                                                                                                                                                                                                                                                                                                                                                                                                                                                                                                                                                                                                                                                                                                                                                                                                                                                                                                                                                                                                                                                                                                                                                                                                                                                                                                                                                                                                                                                                                                                                                                                                                                                                                                                                                                                                                                                                                                                                                                                                                                                                                                                                                                                                                                                                                                                                                                                                                                                                                                                                                                                                                                                                                                                                                                                                                                                                                                                                                                                                                                                                                                                                                                                                                                                                                                                                                                                                                                                                                                                                                                                                                                                                                                                                                                                                                                                                                                                                                                                                                                                                                                                                                                                                                                                                                                                                                                                                                                                                                                                                                                                                                                                                                                                                                                                                                                                                                                                                                                                                                                                                                                                                                                                                                                                                                                                  |
| VC_286_9  | OM386662                                                                                                                                                                                                                                                                                                                                                                                                                                                                                                                                                                                                                                                                                                                                                                                                                                                                                                                                                                                                                                                                                                                                                                                                                                                                                                                                                                                                                                                                                                                                                                                                                                                                                                                                                                                                                                                                                                                                                                                                                                                                                                                                                                                                                                                                                                                                                                                                                                                                                                                                                                                                                                                                                                                                                                                                                                                                                                                                                                                                                                                                                                                                                                                                                                                                                                                                                                                                                                                                                                                                                                                                                                                                                                                                                                                                                                                                                                                                                                                                                                                                                                                                                                                                                                                                                                                                                                                                                                                                                                                                                                                                                                                                                                                                                                                                                                                                                                                                                                                                                                                                                                                                                                                                                                                                                                                                                                                                                                                                                                                                                                                                                                                                                                                                                                                                                                                                                                                                                                                                                                                                                                                                                                                                                                                                                                                                                                                                                                                                                                                                                                                                                                                                                                                                                                                                                                                                                                                                                                                                                                                                                                                                                                                                                                                                                                                                                                                                                                                                                                                                                                                                                                                                                                                                                                                                                                                                                                                                                                                                                                                                                                                                                                                                                                                                                                                                                                                                                                                                                                                                                                                                                                                                                                                                                                                                                                                                                                                                                                                                                                                                                                                                                                                                                                                                                                                                                                                                                                                                                                                                                                                                                                                                                                                                                                                                                                                                                                                                                                                                                                                                                                                                                                                                                                                                                                                                                                                                                                                                                                                                                                                                                                                                                                                                                                                                                                                  |
| VC_287_0  | MT457552,MT457553                                                                                                                                                                                                                                                                                                                                                                                                                                                                                                                                                                                                                                                                                                                                                                                                                                                                                                                                                                                                                                                                                                                                                                                                                                                                                                                                                                                                                                                                                                                                                                                                                                                                                                                                                                                                                                                                                                                                                                                                                                                                                                                                                                                                                                                                                                                                                                                                                                                                                                                                                                                                                                                                                                                                                                                                                                                                                                                                                                                                                                                                                                                                                                                                                                                                                                                                                                                                                                                                                                                                                                                                                                                                                                                                                                                                                                                                                                                                                                                                                                                                                                                                                                                                                                                                                                                                                                                                                                                                                                                                                                                                                                                                                                                                                                                                                                                                                                                                                                                                                                                                                                                                                                                                                                                                                                                                                                                                                                                                                                                                                                                                                                                                                                                                                                                                                                                                                                                                                                                                                                                                                                                                                                                                                                                                                                                                                                                                                                                                                                                                                                                                                                                                                                                                                                                                                                                                                                                                                                                                                                                                                                                                                                                                                                                                                                                                                                                                                                                                                                                                                                                                                                                                                                                                                                                                                                                                                                                                                                                                                                                                                                                                                                                                                                                                                                                                                                                                                                                                                                                                                                                                                                                                                                                                                                                                                                                                                                                                                                                                                                                                                                                                                                                                                                                                                                                                                                                                                                                                                                                                                                                                                                                                                                                                                                                                                                                                                                                                                                                                                                                                                                                                                                                                                                                                                                                                                                                                                                                                                                                                                                                                                                                                                                                                                                                                                                         |
| VC_287_1  | KY971610                                                                                                                                                                                                                                                                                                                                                                                                                                                                                                                                                                                                                                                                                                                                                                                                                                                                                                                                                                                                                                                                                                                                                                                                                                                                                                                                                                                                                                                                                                                                                                                                                                                                                                                                                                                                                                                                                                                                                                                                                                                                                                                                                                                                                                                                                                                                                                                                                                                                                                                                                                                                                                                                                                                                                                                                                                                                                                                                                                                                                                                                                                                                                                                                                                                                                                                                                                                                                                                                                                                                                                                                                                                                                                                                                                                                                                                                                                                                                                                                                                                                                                                                                                                                                                                                                                                                                                                                                                                                                                                                                                                                                                                                                                                                                                                                                                                                                                                                                                                                                                                                                                                                                                                                                                                                                                                                                                                                                                                                                                                                                                                                                                                                                                                                                                                                                                                                                                                                                                                                                                                                                                                                                                                                                                                                                                                                                                                                                                                                                                                                                                                                                                                                                                                                                                                                                                                                                                                                                                                                                                                                                                                                                                                                                                                                                                                                                                                                                                                                                                                                                                                                                                                                                                                                                                                                                                                                                                                                                                                                                                                                                                                                                                                                                                                                                                                                                                                                                                                                                                                                                                                                                                                                                                                                                                                                                                                                                                                                                                                                                                                                                                                                                                                                                                                                                                                                                                                                                                                                                                                                                                                                                                                                                                                                                                                                                                                                                                                                                                                                                                                                                                                                                                                                                                                                                                                                                                                                                                                                                                                                                                                                                                                                                                                                                                                                                                                  |
| VC_288_0  | MW358927,MW385300,OK499989                                                                                                                                                                                                                                                                                                                                                                                                                                                                                                                                                                                                                                                                                                                                                                                                                                                                                                                                                                                                                                                                                                                                                                                                                                                                                                                                                                                                                                                                                                                                                                                                                                                                                                                                                                                                                                                                                                                                                                                                                                                                                                                                                                                                                                                                                                                                                                                                                                                                                                                                                                                                                                                                                                                                                                                                                                                                                                                                                                                                                                                                                                                                                                                                                                                                                                                                                                                                                                                                                                                                                                                                                                                                                                                                                                                                                                                                                                                                                                                                                                                                                                                                                                                                                                                                                                                                                                                                                                                                                                                                                                                                                                                                                                                                                                                                                                                                                                                                                                                                                                                                                                                                                                                                                                                                                                                                                                                                                                                                                                                                                                                                                                                                                                                                                                                                                                                                                                                                                                                                                                                                                                                                                                                                                                                                                                                                                                                                                                                                                                                                                                                                                                                                                                                                                                                                                                                                                                                                                                                                                                                                                                                                                                                                                                                                                                                                                                                                                                                                                                                                                                                                                                                                                                                                                                                                                                                                                                                                                                                                                                                                                                                                                                                                                                                                                                                                                                                                                                                                                                                                                                                                                                                                                                                                                                                                                                                                                                                                                                                                                                                                                                                                                                                                                                                                                                                                                                                                                                                                                                                                                                                                                                                                                                                                                                                                                                                                                                                                                                                                                                                                                                                                                                                                                                                                                                                                                                                                                                                                                                                                                                                                                                                                                                                                                                                                                                |
| VC_288_1  | KX078569                                                                                                                                                                                                                                                                                                                                                                                                                                                                                                                                                                                                                                                                                                                                                                                                                                                                                                                                                                                                                                                                                                                                                                                                                                                                                                                                                                                                                                                                                                                                                                                                                                                                                                                                                                                                                                                                                                                                                                                                                                                                                                                                                                                                                                                                                                                                                                                                                                                                                                                                                                                                                                                                                                                                                                                                                                                                                                                                                                                                                                                                                                                                                                                                                                                                                                                                                                                                                                                                                                                                                                                                                                                                                                                                                                                                                                                                                                                                                                                                                                                                                                                                                                                                                                                                                                                                                                                                                                                                                                                                                                                                                                                                                                                                                                                                                                                                                                                                                                                                                                                                                                                                                                                                                                                                                                                                                                                                                                                                                                                                                                                                                                                                                                                                                                                                                                                                                                                                                                                                                                                                                                                                                                                                                                                                                                                                                                                                                                                                                                                                                                                                                                                                                                                                                                                                                                                                                                                                                                                                                                                                                                                                                                                                                                                                                                                                                                                                                                                                                                                                                                                                                                                                                                                                                                                                                                                                                                                                                                                                                                                                                                                                                                                                                                                                                                                                                                                                                                                                                                                                                                                                                                                                                                                                                                                                                                                                                                                                                                                                                                                                                                                                                                                                                                                                                                                                                                                                                                                                                                                                                                                                                                                                                                                                                                                                                                                                                                                                                                                                                                                                                                                                                                                                                                                                                                                                                                                                                                                                                                                                                                                                                                                                                                                                                                                                                                                  |
| VC_288_2  | MG696114,MK295204                                                                                                                                                                                                                                                                                                                                                                                                                                                                                                                                                                                                                                                                                                                                                                                                                                                                                                                                                                                                                                                                                                                                                                                                                                                                                                                                                                                                                                                                                                                                                                                                                                                                                                                                                                                                                                                                                                                                                                                                                                                                                                                                                                                                                                                                                                                                                                                                                                                                                                                                                                                                                                                                                                                                                                                                                                                                                                                                                                                                                                                                                                                                                                                                                                                                                                                                                                                                                                                                                                                                                                                                                                                                                                                                                                                                                                                                                                                                                                                                                                                                                                                                                                                                                                                                                                                                                                                                                                                                                                                                                                                                                                                                                                                                                                                                                                                                                                                                                                                                                                                                                                                                                                                                                                                                                                                                                                                                                                                                                                                                                                                                                                                                                                                                                                                                                                                                                                                                                                                                                                                                                                                                                                                                                                                                                                                                                                                                                                                                                                                                                                                                                                                                                                                                                                                                                                                                                                                                                                                                                                                                                                                                                                                                                                                                                                                                                                                                                                                                                                                                                                                                                                                                                                                                                                                                                                                                                                                                                                                                                                                                                                                                                                                                                                                                                                                                                                                                                                                                                                                                                                                                                                                                                                                                                                                                                                                                                                                                                                                                                                                                                                                                                                                                                                                                                                                                                                                                                                                                                                                                                                                                                                                                                                                                                                                                                                                                                                                                                                                                                                                                                                                                                                                                                                                                                                                                                                                                                                                                                                                                                                                                                                                                                                                                                                                                                                         |
| VC_288_3  | KP890823,MF001355,MW367898                                                                                                                                                                                                                                                                                                                                                                                                                                                                                                                                                                                                                                                                                                                                                                                                                                                                                                                                                                                                                                                                                                                                                                                                                                                                                                                                                                                                                                                                                                                                                                                                                                                                                                                                                                                                                                                                                                                                                                                                                                                                                                                                                                                                                                                                                                                                                                                                                                                                                                                                                                                                                                                                                                                                                                                                                                                                                                                                                                                                                                                                                                                                                                                                                                                                                                                                                                                                                                                                                                                                                                                                                                                                                                                                                                                                                                                                                                                                                                                                                                                                                                                                                                                                                                                                                                                                                                                                                                                                                                                                                                                                                                                                                                                                                                                                                                                                                                                                                                                                                                                                                                                                                                                                                                                                                                                                                                                                                                                                                                                                                                                                                                                                                                                                                                                                                                                                                                                                                                                                                                                                                                                                                                                                                                                                                                                                                                                                                                                                                                                                                                                                                                                                                                                                                                                                                                                                                                                                                                                                                                                                                                                                                                                                                                                                                                                                                                                                                                                                                                                                                                                                                                                                                                                                                                                                                                                                                                                                                                                                                                                                                                                                                                                                                                                                                                                                                                                                                                                                                                                                                                                                                                                                                                                                                                                                                                                                                                                                                                                                                                                                                                                                                                                                                                                                                                                                                                                                                                                                                                                                                                                                                                                                                                                                                                                                                                                                                                                                                                                                                                                                                                                                                                                                                                                                                                                                                                                                                                                                                                                                                                                                                                                                                                                                                                                                                                |
| VC_288_4  | MW057858                                                                                                                                                                                                                                                                                                                                                                                                                                                                                                                                                                                                                                                                                                                                                                                                                                                                                                                                                                                                                                                                                                                                                                                                                                                                                                                                                                                                                                                                                                                                                                                                                                                                                                                                                                                                                                                                                                                                                                                                                                                                                                                                                                                                                                                                                                                                                                                                                                                                                                                                                                                                                                                                                                                                                                                                                                                                                                                                                                                                                                                                                                                                                                                                                                                                                                                                                                                                                                                                                                                                                                                                                                                                                                                                                                                                                                                                                                                                                                                                                                                                                                                                                                                                                                                                                                                                                                                                                                                                                                                                                                                                                                                                                                                                                                                                                                                                                                                                                                                                                                                                                                                                                                                                                                                                                                                                                                                                                                                                                                                                                                                                                                                                                                                                                                                                                                                                                                                                                                                                                                                                                                                                                                                                                                                                                                                                                                                                                                                                                                                                                                                                                                                                                                                                                                                                                                                                                                                                                                                                                                                                                                                                                                                                                                                                                                                                                                                                                                                                                                                                                                                                                                                                                                                                                                                                                                                                                                                                                                                                                                                                                                                                                                                                                                                                                                                                                                                                                                                                                                                                                                                                                                                                                                                                                                                                                                                                                                                                                                                                                                                                                                                                                                                                                                                                                                                                                                                                                                                                                                                                                                                                                                                                                                                                                                                                                                                                                                                                                                                                                                                                                                                                                                                                                                                                                                                                                                                                                                                                                                                                                                                                                                                                                                                                                                                                                                                  |
| VC_29_0   | AF157835,EU794049,LR794146,LR794147,LR794148,LR794149,LR794150,LR794151,LR794152,LR797923                                                                                                                                                                                                                                                                                                                                                                                                                                                                                                                                                                                                                                                                                                                                                                                                                                                                                                                                                                                                                                                                                                                                                                                                                                                                                                                                                                                                                                                                                                                                                                                                                                                                                                                                                                                                                                                                                                                                                                                                                                                                                                                                                                                                                                                                                                                                                                                                                                                                                                                                                                                                                                                                                                                                                                                                                                                                                                                                                                                                                                                                                                                                                                                                                                                                                                                                                                                                                                                                                                                                                                                                                                                                                                                                                                                                                                                                                                                                                                                                                                                                                                                                                                                                                                                                                                                                                                                                                                                                                                                                                                                                                                                                                                                                                                                                                                                                                                                                                                                                                                                                                                                                                                                                                                                                                                                                                                                                                                                                                                                                                                                                                                                                                                                                                                                                                                                                                                                                                                                                                                                                                                                                                                                                                                                                                                                                                                                                                                                                                                                                                                                                                                                                                                                                                                                                                                                                                                                                                                                                                                                                                                                                                                                                                                                                                                                                                                                                                                                                                                                                                                                                                                                                                                                                                                                                                                                                                                                                                                                                                                                                                                                                                                                                                                                                                                                                                                                                                                                                                                                                                                                                                                                                                                                                                                                                                                                                                                                                                                                                                                                                                                                                                                                                                                                                                                                                                                                                                                                                                                                                                                                                                                                                                                                                                                                                                                                                                                                                                                                                                                                                                                                                                                                                                                                                                                                                                                                                                                                                                                                                                                                                                                                                                                                                                                 |
| VC_290_0  | MT129652,MT446396,MT446411,MT446412,MT446415,MT446421,MT611523,MW233709,MW250787,MW598459                                                                                                                                                                                                                                                                                                                                                                                                                                                                                                                                                                                                                                                                                                                                                                                                                                                                                                                                                                                                                                                                                                                                                                                                                                                                                                                                                                                                                                                                                                                                                                                                                                                                                                                                                                                                                                                                                                                                                                                                                                                                                                                                                                                                                                                                                                                                                                                                                                                                                                                                                                                                                                                                                                                                                                                                                                                                                                                                                                                                                                                                                                                                                                                                                                                                                                                                                                                                                                                                                                                                                                                                                                                                                                                                                                                                                                                                                                                                                                                                                                                                                                                                                                                                                                                                                                                                                                                                                                                                                                                                                                                                                                                                                                                                                                                                                                                                                                                                                                                                                                                                                                                                                                                                                                                                                                                                                                                                                                                                                                                                                                                                                                                                                                                                                                                                                                                                                                                                                                                                                                                                                                                                                                                                                                                                                                                                                                                                                                                                                                                                                                                                                                                                                                                                                                                                                                                                                                                                                                                                                                                                                                                                                                                                                                                                                                                                                                                                                                                                                                                                                                                                                                                                                                                                                                                                                                                                                                                                                                                                                                                                                                                                                                                                                                                                                                                                                                                                                                                                                                                                                                                                                                                                                                                                                                                                                                                                                                                                                                                                                                                                                                                                                                                                                                                                                                                                                                                                                                                                                                                                                                                                                                                                                                                                                                                                                                                                                                                                                                                                                                                                                                                                                                                                                                                                                                                                                                                                                                                                                                                                                                                                                                                                                                                                                                 |
| VC_290_1  | GQ981382,KP007360,MT446420,MT446422,MT533174,MW269952,OK254198,OL451225                                                                                                                                                                                                                                                                                                                                                                                                                                                                                                                                                                                                                                                                                                                                                                                                                                                                                                                                                                                                                                                                                                                                                                                                                                                                                                                                                                                                                                                                                                                                                                                                                                                                                                                                                                                                                                                                                                                                                                                                                                                                                                                                                                                                                                                                                                                                                                                                                                                                                                                                                                                                                                                                                                                                                                                                                                                                                                                                                                                                                                                                                                                                                                                                                                                                                                                                                                                                                                                                                                                                                                                                                                                                                                                                                                                                                                                                                                                                                                                                                                                                                                                                                                                                                                                                                                                                                                                                                                                                                                                                                                                                                                                                                                                                                                                                                                                                                                                                                                                                                                                                                                                                                                                                                                                                                                                                                                                                                                                                                                                                                                                                                                                                                                                                                                                                                                                                                                                                                                                                                                                                                                                                                                                                                                                                                                                                                                                                                                                                                                                                                                                                                                                                                                                                                                                                                                                                                                                                                                                                                                                                                                                                                                                                                                                                                                                                                                                                                                                                                                                                                                                                                                                                                                                                                                                                                                                                                                                                                                                                                                                                                                                                                                                                                                                                                                                                                                                                                                                                                                                                                                                                                                                                                                                                                                                                                                                                                                                                                                                                                                                                                                                                                                                                                                                                                                                                                                                                                                                                                                                                                                                                                                                                                                                                                                                                                                                                                                                                                                                                                                                                                                                                                                                                                                                                                                                                                                                                                                                                                                                                                                                                                                                                                                                                                                                   |
| VC_290_2  | HM563683,KP007361                                                                                                                                                                                                                                                                                                                                                                                                                                                                                                                                                                                                                                                                                                                                                                                                                                                                                                                                                                                                                                                                                                                                                                                                                                                                                                                                                                                                                                                                                                                                                                                                                                                                                                                                                                                                                                                                                                                                                                                                                                                                                                                                                                                                                                                                                                                                                                                                                                                                                                                                                                                                                                                                                                                                                                                                                                                                                                                                                                                                                                                                                                                                                                                                                                                                                                                                                                                                                                                                                                                                                                                                                                                                                                                                                                                                                                                                                                                                                                                                                                                                                                                                                                                                                                                                                                                                                                                                                                                                                                                                                                                                                                                                                                                                                                                                                                                                                                                                                                                                                                                                                                                                                                                                                                                                                                                                                                                                                                                                                                                                                                                                                                                                                                                                                                                                                                                                                                                                                                                                                                                                                                                                                                                                                                                                                                                                                                                                                                                                                                                                                                                                                                                                                                                                                                                                                                                                                                                                                                                                                                                                                                                                                                                                                                                                                                                                                                                                                                                                                                                                                                                                                                                                                                                                                                                                                                                                                                                                                                                                                                                                                                                                                                                                                                                                                                                                                                                                                                                                                                                                                                                                                                                                                                                                                                                                                                                                                                                                                                                                                                                                                                                                                                                                                                                                                                                                                                                                                                                                                                                                                                                                                                                                                                                                                                                                                                                                                                                                                                                                                                                                                                                                                                                                                                                                                                                                                                                                                                                                                                                                                                                                                                                                                                                                                                                                                                         |
| VC_290_3  | KP007362,MT446392                                                                                                                                                                                                                                                                                                                                                                                                                                                                                                                                                                                                                                                                                                                                                                                                                                                                                                                                                                                                                                                                                                                                                                                                                                                                                                                                                                                                                                                                                                                                                                                                                                                                                                                                                                                                                                                                                                                                                                                                                                                                                                                                                                                                                                                                                                                                                                                                                                                                                                                                                                                                                                                                                                                                                                                                                                                                                                                                                                                                                                                                                                                                                                                                                                                                                                                                                                                                                                                                                                                                                                                                                                                                                                                                                                                                                                                                                                                                                                                                                                                                                                                                                                                                                                                                                                                                                                                                                                                                                                                                                                                                                                                                                                                                                                                                                                                                                                                                                                                                                                                                                                                                                                                                                                                                                                                                                                                                                                                                                                                                                                                                                                                                                                                                                                                                                                                                                                                                                                                                                                                                                                                                                                                                                                                                                                                                                                                                                                                                                                                                                                                                                                                                                                                                                                                                                                                                                                                                                                                                                                                                                                                                                                                                                                                                                                                                                                                                                                                                                                                                                                                                                                                                                                                                                                                                                                                                                                                                                                                                                                                                                                                                                                                                                                                                                                                                                                                                                                                                                                                                                                                                                                                                                                                                                                                                                                                                                                                                                                                                                                                                                                                                                                                                                                                                                                                                                                                                                                                                                                                                                                                                                                                                                                                                                                                                                                                                                                                                                                                                                                                                                                                                                                                                                                                                                                                                                                                                                                                                                                                                                                                                                                                                                                                                                                                                                                         |
| VC_290_4  | KP007359,OM386655                                                                                                                                                                                                                                                                                                                                                                                                                                                                                                                                                                                                                                                                                                                                                                                                                                                                                                                                                                                                                                                                                                                                                                                                                                                                                                                                                                                                                                                                                                                                                                                                                                                                                                                                                                                                                                                                                                                                                                                                                                                                                                                                                                                                                                                                                                                                                                                                                                                                                                                                                                                                                                                                                                                                                                                                                                                                                                                                                                                                                                                                                                                                                                                                                                                                                                                                                                                                                                                                                                                                                                                                                                                                                                                                                                                                                                                                                                                                                                                                                                                                                                                                                                                                                                                                                                                                                                                                                                                                                                                                                                                                                                                                                                                                                                                                                                                                                                                                                                                                                                                                                                                                                                                                                                                                                                                                                                                                                                                                                                                                                                                                                                                                                                                                                                                                                                                                                                                                                                                                                                                                                                                                                                                                                                                                                                                                                                                                                                                                                                                                                                                                                                                                                                                                                                                                                                                                                                                                                                                                                                                                                                                                                                                                                                                                                                                                                                                                                                                                                                                                                                                                                                                                                                                                                                                                                                                                                                                                                                                                                                                                                                                                                                                                                                                                                                                                                                                                                                                                                                                                                                                                                                                                                                                                                                                                                                                                                                                                                                                                                                                                                                                                                                                                                                                                                                                                                                                                                                                                                                                                                                                                                                                                                                                                                                                                                                                                                                                                                                                                                                                                                                                                                                                                                                                                                                                                                                                                                                                                                                                                                                                                                                                                                                                                                                                                                                         |
| VC_290_5  | HM071924,HQ829472,KT176190,KU878968,KU878969,MH051917,MK234886,MT150133,MT682711,MW149274,MW679410,MZ561532,OK335775,OL780484                                                                                                                                                                                                                                                                                                                                                                                                                                                                                                                                                                                                                                                                                                                                                                                                                                                                                                                                                                                                                                                                                                                                                                                                                                                                                                                                                                                                                                                                                                                                                                                                                                                                                                                                                                                                                                                                                                                                                                                                                                                                                                                                                                                                                                                                                                                                                                                                                                                                                                                                                                                                                                                                                                                                                                                                                                                                                                                                                                                                                                                                                                                                                                                                                                                                                                                                                                                                                                                                                                                                                                                                                                                                                                                                                                                                                                                                                                                                                                                                                                                                                                                                                                                                                                                                                                                                                                                                                                                                                                                                                                                                                                                                                                                                                                                                                                                                                                                                                                                                                                                                                                                                                                                                                                                                                                                                                                                                                                                                                                                                                                                                                                                                                                                                                                                                                                                                                                                                                                                                                                                                                                                                                                                                                                                                                                                                                                                                                                                                                                                                                                                                                                                                                                                                                                                                                                                                                                                                                                                                                                                                                                                                                                                                                                                                                                                                                                                                                                                                                                                                                                                                                                                                                                                                                                                                                                                                                                                                                                                                                                                                                                                                                                                                                                                                                                                                                                                                                                                                                                                                                                                                                                                                                                                                                                                                                                                                                                                                                                                                                                                                                                                                                                                                                                                                                                                                                                                                                                                                                                                                                                                                                                                                                                                                                                                                                                                                                                                                                                                                                                                                                                                                                                                                                                                                                                                                                                                                                                                                                                                                                                                                                                                                                                                             |
| VC_290_6  | EF469154,EU863409,MH051913,MH791409,MK310184,MN850609,MN850621,MT129654,OL770107,OP292222,OV876907,OV877765                                                                                                                                                                                                                                                                                                                                                                                                                                                                                                                                                                                                                                                                                                                                                                                                                                                                                                                                                                                                                                                                                                                                                                                                                                                                                                                                                                                                                                                                                                                                                                                                                                                                                                                                                                                                                                                                                                                                                                                                                                                                                                                                                                                                                                                                                                                                                                                                                                                                                                                                                                                                                                                                                                                                                                                                                                                                                                                                                                                                                                                                                                                                                                                                                                                                                                                                                                                                                                                                                                                                                                                                                                                                                                                                                                                                                                                                                                                                                                                                                                                                                                                                                                                                                                                                                                                                                                                                                                                                                                                                                                                                                                                                                                                                                                                                                                                                                                                                                                                                                                                                                                                                                                                                                                                                                                                                                                                                                                                                                                                                                                                                                                                                                                                                                                                                                                                                                                                                                                                                                                                                                                                                                                                                                                                                                                                                                                                                                                                                                                                                                                                                                                                                                                                                                                                                                                                                                                                                                                                                                                                                                                                                                                                                                                                                                                                                                                                                                                                                                                                                                                                                                                                                                                                                                                                                                                                                                                                                                                                                                                                                                                                                                                                                                                                                                                                                                                                                                                                                                                                                                                                                                                                                                                                                                                                                                                                                                                                                                                                                                                                                                                                                                                                                                                                                                                                                                                                                                                                                                                                                                                                                                                                                                                                                                                                                                                                                                                                                                                                                                                                                                                                                                                                                                                                                                                                                                                                                                                                                                                                                                                                                                                                                                                                                               |
| VC_290_7  | MK295203                                                                                                                                                                                                                                                                                                                                                                                                                                                                                                                                                                                                                                                                                                                                                                                                                                                                                                                                                                                                                                                                                                                                                                                                                                                                                                                                                                                                                                                                                                                                                                                                                                                                                                                                                                                                                                                                                                                                                                                                                                                                                                                                                                                                                                                                                                                                                                                                                                                                                                                                                                                                                                                                                                                                                                                                                                                                                                                                                                                                                                                                                                                                                                                                                                                                                                                                                                                                                                                                                                                                                                                                                                                                                                                                                                                                                                                                                                                                                                                                                                                                                                                                                                                                                                                                                                                                                                                                                                                                                                                                                                                                                                                                                                                                                                                                                                                                                                                                                                                                                                                                                                                                                                                                                                                                                                                                                                                                                                                                                                                                                                                                                                                                                                                                                                                                                                                                                                                                                                                                                                                                                                                                                                                                                                                                                                                                                                                                                                                                                                                                                                                                                                                                                                                                                                                                                                                                                                                                                                                                                                                                                                                                                                                                                                                                                                                                                                                                                                                                                                                                                                                                                                                                                                                                                                                                                                                                                                                                                                                                                                                                                                                                                                                                                                                                                                                                                                                                                                                                                                                                                                                                                                                                                                                                                                                                                                                                                                                                                                                                                                                                                                                                                                                                                                                                                                                                                                                                                                                                                                                                                                                                                                                                                                                                                                                                                                                                                                                                                                                                                                                                                                                                                                                                                                                                                                                                                                                                                                                                                                                                                                                                                                                                                                                                                                                                                                                  |
| VC_292_0  | MK448704,MK448707,MK448709,MK448710                                                                                                                                                                                                                                                                                                                                                                                                                                                                                                                                                                                                                                                                                                                                                                                                                                                                                                                                                                                                                                                                                                                                                                                                                                                                                                                                                                                                                                                                                                                                                                                                                                                                                                                                                                                                                                                                                                                                                                                                                                                                                                                                                                                                                                                                                                                                                                                                                                                                                                                                                                                                                                                                                                                                                                                                                                                                                                                                                                                                                                                                                                                                                                                                                                                                                                                                                                                                                                                                                                                                                                                                                                                                                                                                                                                                                                                                                                                                                                                                                                                                                                                                                                                                                                                                                                                                                                                                                                                                                                                                                                                                                                                                                                                                                                                                                                                                                                                                                                                                                                                                                                                                                                                                                                                                                                                                                                                                                                                                                                                                                                                                                                                                                                                                                                                                                                                                                                                                                                                                                                                                                                                                                                                                                                                                                                                                                                                                                                                                                                                                                                                                                                                                                                                                                                                                                                                                                                                                                                                                                                                                                                                                                                                                                                                                                                                                                                                                                                                                                                                                                                                                                                                                                                                                                                                                                                                                                                                                                                                                                                                                                                                                                                                                                                                                                                                                                                                                                                                                                                                                                                                                                                                                                                                                                                                                                                                                                                                                                                                                                                                                                                                                                                                                                                                                                                                                                                                                                                                                                                                                                                                                                                                                                                                                                                                                                                                                                                                                                                                                                                                                                                                                                                                                                                                                                                                                                                                                                                                                                                                                                                                                                                                                                                                                                                                                                       |
| VC_293_0  | MK448750                                                                                                                                                                                                                                                                                                                                                                                                                                                                                                                                                                                                                                                                                                                                                                                                                                                                                                                                                                                                                                                                                                                                                                                                                                                                                                                                                                                                                                                                                                                                                                                                                                                                                                                                                                                                                                                                                                                                                                                                                                                                                                                                                                                                                                                                                                                                                                                                                                                                                                                                                                                                                                                                                                                                                                                                                                                                                                                                                                                                                                                                                                                                                                                                                                                                                                                                                                                                                                                                                                                                                                                                                                                                                                                                                                                                                                                                                                                                                                                                                                                                                                                                                                                                                                                                                                                                                                                                                                                                                                                                                                                                                                                                                                                                                                                                                                                                                                                                                                                                                                                                                                                                                                                                                                                                                                                                                                                                                                                                                                                                                                                                                                                                                                                                                                                                                                                                                                                                                                                                                                                                                                                                                                                                                                                                                                                                                                                                                                                                                                                                                                                                                                                                                                                                                                                                                                                                                                                                                                                                                                                                                                                                                                                                                                                                                                                                                                                                                                                                                                                                                                                                                                                                                                                                                                                                                                                                                                                                                                                                                                                                                                                                                                                                                                                                                                                                                                                                                                                                                                                                                                                                                                                                                                                                                                                                                                                                                                                                                                                                                                                                                                                                                                                                                                                                                                                                                                                                                                                                                                                                                                                                                                                                                                                                                                                                                                                                                                                                                                                                                                                                                                                                                                                                                                                                                                                                                                                                                                                                                                                                                                                                                                                                                                                                                                                                                                                  |
| VC_293_1  | MK448995                                                                                                                                                                                                                                                                                                                                                                                                                                                                                                                                                                                                                                                                                                                                                                                                                                                                                                                                                                                                                                                                                                                                                                                                                                                                                                                                                                                                                                                                                                                                                                                                                                                                                                                                                                                                                                                                                                                                                                                                                                                                                                                                                                                                                                                                                                                                                                                                                                                                                                                                                                                                                                                                                                                                                                                                                                                                                                                                                                                                                                                                                                                                                                                                                                                                                                                                                                                                                                                                                                                                                                                                                                                                                                                                                                                                                                                                                                                                                                                                                                                                                                                                                                                                                                                                                                                                                                                                                                                                                                                                                                                                                                                                                                                                                                                                                                                                                                                                                                                                                                                                                                                                                                                                                                                                                                                                                                                                                                                                                                                                                                                                                                                                                                                                                                                                                                                                                                                                                                                                                                                                                                                                                                                                                                                                                                                                                                                                                                                                                                                                                                                                                                                                                                                                                                                                                                                                                                                                                                                                                                                                                                                                                                                                                                                                                                                                                                                                                                                                                                                                                                                                                                                                                                                                                                                                                                                                                                                                                                                                                                                                                                                                                                                                                                                                                                                                                                                                                                                                                                                                                                                                                                                                                                                                                                                                                                                                                                                                                                                                                                                                                                                                                                                                                                                                                                                                                                                                                                                                                                                                                                                                                                                                                                                                                                                                                                                                                                                                                                                                                                                                                                                                                                                                                                                                                                                                                                                                                                                                                                                                                                                                                                                                                                                                                                                                                                                  |
| VC_293_2  | MK448740,MK448917                                                                                                                                                                                                                                                                                                                                                                                                                                                                                                                                                                                                                                                                                                                                                                                                                                                                                                                                                                                                                                                                                                                                                                                                                                                                                                                                                                                                                                                                                                                                                                                                                                                                                                                                                                                                                                                                                                                                                                                                                                                                                                                                                                                                                                                                                                                                                                                                                                                                                                                                                                                                                                                                                                                                                                                                                                                                                                                                                                                                                                                                                                                                                                                                                                                                                                                                                                                                                                                                                                                                                                                                                                                                                                                                                                                                                                                                                                                                                                                                                                                                                                                                                                                                                                                                                                                                                                                                                                                                                                                                                                                                                                                                                                                                                                                                                                                                                                                                                                                                                                                                                                                                                                                                                                                                                                                                                                                                                                                                                                                                                                                                                                                                                                                                                                                                                                                                                                                                                                                                                                                                                                                                                                                                                                                                                                                                                                                                                                                                                                                                                                                                                                                                                                                                                                                                                                                                                                                                                                                                                                                                                                                                                                                                                                                                                                                                                                                                                                                                                                                                                                                                                                                                                                                                                                                                                                                                                                                                                                                                                                                                                                                                                                                                                                                                                                                                                                                                                                                                                                                                                                                                                                                                                                                                                                                                                                                                                                                                                                                                                                                                                                                                                                                                                                                                                                                                                                                                                                                                                                                                                                                                                                                                                                                                                                                                                                                                                                                                                                                                                                                                                                                                                                                                                                                                                                                                                                                                                                                                                                                                                                                                                                                                                                                                                                                                                                         |
| VC_293_3  | MK448675,MK448676,MK448688,MK448690,MK448694,MK448772,MK448778,MK448782,MK448850,MK448859,MK448877,MK448931,MK448955,MK448962,MK448966,MK448973,MK448975,MK449004,OL774870                                                                                                                                                                                                                                                                                                                                                                                                                                                                                                                                                                                                                                                                                                                                                                                                                                                                                                                                                                                                                                                                                                                                                                                                                                                                                                                                                                                                                                                                                                                                                                                                                                                                                                                                                                                                                                                                                                                                                                                                                                                                                                                                                                                                                                                                                                                                                                                                                                                                                                                                                                                                                                                                                                                                                                                                                                                                                                                                                                                                                                                                                                                                                                                                                                                                                                                                                                                                                                                                                                                                                                                                                                                                                                                                                                                                                                                                                                                                                                                                                                                                                                                                                                                                                                                                                                                                                                                                                                                                                                                                                                                                                                                                                                                                                                                                                                                                                                                                                                                                                                                                                                                                                                                                                                                                                                                                                                                                                                                                                                                                                                                                                                                                                                                                                                                                                                                                                                                                                                                                                                                                                                                                                                                                                                                                                                                                                                                                                                                                                                                                                                                                                                                                                                                                                                                                                                                                                                                                                                                                                                                                                                                                                                                                                                                                                                                                                                                                                                                                                                                                                                                                                                                                                                                                                                                                                                                                                                                                                                                                                                                                                                                                                                                                                                                                                                                                                                                                                                                                                                                                                                                                                                                                                                                                                                                                                                                                                                                                                                                                                                                                                                                                                                                                                                                                                                                                                                                                                                                                                                                                                                                                                                                                                                                                                                                                                                                                                                                                                                                                                                                                                                                                                                                                                                                                                                                                                                                                                                                                                                                                                                                                                                                                                |
| VC_294_0  | MK448832,MK449008                                                                                                                                                                                                                                                                                                                                                                                                                                                                                                                                                                                                                                                                                                                                                                                                                                                                                                                                                                                                                                                                                                                                                                                                                                                                                                                                                                                                                                                                                                                                                                                                                                                                                                                                                                                                                                                                                                                                                                                                                                                                                                                                                                                                                                                                                                                                                                                                                                                                                                                                                                                                                                                                                                                                                                                                                                                                                                                                                                                                                                                                                                                                                                                                                                                                                                                                                                                                                                                                                                                                                                                                                                                                                                                                                                                                                                                                                                                                                                                                                                                                                                                                                                                                                                                                                                                                                                                                                                                                                                                                                                                                                                                                                                                                                                                                                                                                                                                                                                                                                                                                                                                                                                                                                                                                                                                                                                                                                                                                                                                                                                                                                                                                                                                                                                                                                                                                                                                                                                                                                                                                                                                                                                                                                                                                                                                                                                                                                                                                                                                                                                                                                                                                                                                                                                                                                                                                                                                                                                                                                                                                                                                                                                                                                                                                                                                                                                                                                                                                                                                                                                                                                                                                                                                                                                                                                                                                                                                                                                                                                                                                                                                                                                                                                                                                                                                                                                                                                                                                                                                                                                                                                                                                                                                                                                                                                                                                                                                                                                                                                                                                                                                                                                                                                                                                                                                                                                                                                                                                                                                                                                                                                                                                                                                                                                                                                                                                                                                                                                                                                                                                                                                                                                                                                                                                                                                                                                                                                                                                                                                                                                                                                                                                                                                                                                                                                                         |
| VC_295_0  | MK819239,ON857931                                                                                                                                                                                                                                                                                                                                                                                                                                                                                                                                                                                                                                                                                                                                                                                                                                                                                                                                                                                                                                                                                                                                                                                                                                                                                                                                                                                                                                                                                                                                                                                                                                                                                                                                                                                                                                                                                                                                                                                                                                                                                                                                                                                                                                                                                                                                                                                                                                                                                                                                                                                                                                                                                                                                                                                                                                                                                                                                                                                                                                                                                                                                                                                                                                                                                                                                                                                                                                                                                                                                                                                                                                                                                                                                                                                                                                                                                                                                                                                                                                                                                                                                                                                                                                                                                                                                                                                                                                                                                                                                                                                                                                                                                                                                                                                                                                                                                                                                                                                                                                                                                                                                                                                                                                                                                                                                                                                                                                                                                                                                                                                                                                                                                                                                                                                                                                                                                                                                                                                                                                                                                                                                                                                                                                                                                                                                                                                                                                                                                                                                                                                                                                                                                                                                                                                                                                                                                                                                                                                                                                                                                                                                                                                                                                                                                                                                                                                                                                                                                                                                                                                                                                                                                                                                                                                                                                                                                                                                                                                                                                                                                                                                                                                                                                                                                                                                                                                                                                                                                                                                                                                                                                                                                                                                                                                                                                                                                                                                                                                                                                                                                                                                                                                                                                                                                                                                                                                                                                                                                                                                                                                                                                                                                                                                                                                                                                                                                                                                                                                                                                                                                                                                                                                                                                                                                                                                                                                                                                                                                                                                                                                                                                                                                                                                                                                                                                         |
| VC_296_0  | MG592403,MG592404,MG592405,MG592551,MN592897,MW824406                                                                                                                                                                                                                                                                                                                                                                                                                                                                                                                                                                                                                                                                                                                                                                                                                                                                                                                                                                                                                                                                                                                                                                                                                                                                                                                                                                                                                                                                                                                                                                                                                                                                                                                                                                                                                                                                                                                                                                                                                                                                                                                                                                                                                                                                                                                                                                                                                                                                                                                                                                                                                                                                                                                                                                                                                                                                                                                                                                                                                                                                                                                                                                                                                                                                                                                                                                                                                                                                                                                                                                                                                                                                                                                                                                                                                                                                                                                                                                                                                                                                                                                                                                                                                                                                                                                                                                                                                                                                                                                                                                                                                                                                                                                                                                                                                                                                                                                                                                                                                                                                                                                                                                                                                                                                                                                                                                                                                                                                                                                                                                                                                                                                                                                                                                                                                                                                                                                                                                                                                                                                                                                                                                                                                                                                                                                                                                                                                                                                                                                                                                                                                                                                                                                                                                                                                                                                                                                                                                                                                                                                                                                                                                                                                                                                                                                                                                                                                                                                                                                                                                                                                                                                                                                                                                                                                                                                                                                                                                                                                                                                                                                                                                                                                                                                                                                                                                                                                                                                                                                                                                                                                                                                                                                                                                                                                                                                                                                                                                                                                                                                                                                                                                                                                                                                                                                                                                                                                                                                                                                                                                                                                                                                                                                                                                                                                                                                                                                                                                                                                                                                                                                                                                                                                                                                                                                                                                                                                                                                                                                                                                                                                                                                                                                                                                                                     |
| VC_297_0  | KM389210,KU1199710,MW748993,MZ089728,ON778007                                                                                                                                                                                                                                                                                                                                                                                                                                                                                                                                                                                                                                                                                                                                                                                                                                                                                                                                                                                                                                                                                                                                                                                                                                                                                                                                                                                                                                                                                                                                                                                                                                                                                                                                                                                                                                                                                                                                                                                                                                                                                                                                                                                                                                                                                                                                                                                                                                                                                                                                                                                                                                                                                                                                                                                                                                                                                                                                                                                                                                                                                                                                                                                                                                                                                                                                                                                                                                                                                                                                                                                                                                                                                                                                                                                                                                                                                                                                                                                                                                                                                                                                                                                                                                                                                                                                                                                                                                                                                                                                                                                                                                                                                                                                                                                                                                                                                                                                                                                                                                                                                                                                                                                                                                                                                                                                                                                                                                                                                                                                                                                                                                                                                                                                                                                                                                                                                                                                                                                                                                                                                                                                                                                                                                                                                                                                                                                                                                                                                                                                                                                                                                                                                                                                                                                                                                                                                                                                                                                                                                                                                                                                                                                                                                                                                                                                                                                                                                                                                                                                                                                                                                                                                                                                                                                                                                                                                                                                                                                                                                                                                                                                                                                                                                                                                                                                                                                                                                                                                                                                                                                                                                                                                                                                                                                                                                                                                                                                                                                                                                                                                                                                                                                                                                                                                                                                                                                                                                                                                                                                                                                                                                                                                                                                                                                                                                                                                                                                                                                                                                                                                                                                                                                                                                                                                                                                                                                                                                                                                                                                                                                                                                                                                                                                                                                                             |
| VC_297_1  | HQ711984,IX403939,KU310943,MK511001,MK511002,MK511003,MK511004,MK511005,MK511006,MK511007,MK511008,MK511009,MK511010,MK511011,MK511012,MK511013,MK511014,MK511015,MK511016,MZ773939                                                                                                                                                                                                                                                                                                                                                                                                                                                                                                                                                                                                                                                                                                                                                                                                                                                                                                                                                                                                                                                                                                                                                                                                                                                                                                                                                                                                                                                                                                                                                                                                                                                                                                                                                                                                                                                                                                                                                                                                                                                                                                                                                                                                                                                                                                                                                                                                                                                                                                                                                                                                                                                                                                                                                                                                                                                                                                                                                                                                                                                                                                                                                                                                                                                                                                                                                                                                                                                                                                                                                                                                                                                                                                                                                                                                                                                                                                                                                                                                                                                                                                                                                                                                                                                                                                                                                                                                                                                                                                                                                                                                                                                                                                                                                                                                                                                                                                                                                                                                                                                                                                                                                                                                                                                                                                                                                                                                                                                                                                                                                                                                                                                                                                                                                                                                                                                                                                                                                                                                                                                                                                                                                                                                                                                                                                                                                                                                                                                                                                                                                                                                                                                                                                                                                                                                                                                                                                                                                                                                                                                                                                                                                                                                                                                                                                                                                                                                                                                                                                                                                                                                                                                                                                                                                                                                                                                                                                                                                                                                                                                                                                                                                                                                                                                                                                                                                                                                                                                                                                                                                                                                                                                                                                                                                                                                                                                                                                                                                                                                                                                                                                                                                                                                                                                                                                                                                                                                                                                                                                                                                                                                                                                                                                                                                                                                                                                                                                                                                                                                                                                                                                                                                                                                                                                                                                                                                                                                                                                                                                                                                                                                                                                                       |
| VC_298_0  | KU708004                                                                                                                                                                                                                                                                                                                                                                                                                                                                                                                                                                                                                                                                                                                                                                                                                                                                                                                                                                                                                                                                                                                                                                                                                                                                                                                                                                                                                                                                                                                                                                                                                                                                                                                                                                                                                                                                                                                                                                                                                                                                                                                                                                                                                                                                                                                                                                                                                                                                                                                                                                                                                                                                                                                                                                                                                                                                                                                                                                                                                                                                                                                                                                                                                                                                                                                                                                                                                                                                                                                                                                                                                                                                                                                                                                                                                                                                                                                                                                                                                                                                                                                                                                                                                                                                                                                                                                                                                                                                                                                                                                                                                                                                                                                                                                                                                                                                                                                                                                                                                                                                                                                                                                                                                                                                                                                                                                                                                                                                                                                                                                                                                                                                                                                                                                                                                                                                                                                                                                                                                                                                                                                                                                                                                                                                                                                                                                                                                                                                                                                                                                                                                                                                                                                                                                                                                                                                                                                                                                                                                                                                                                                                                                                                                                                                                                                                                                                                                                                                                                                                                                                                                                                                                                                                                                                                                                                                                                                                                                                                                                                                                                                                                                                                                                                                                                                                                                                                                                                                                                                                                                                                                                                                                                                                                                                                                                                                                                                                                                                                                                                                                                                                                                                                                                                                                                                                                                                                                                                                                                                                                                                                                                                                                                                                                                                                                                                                                                                                                                                                                                                                                                                                                                                                                                                                                                                                                                                                                                                                                                                                                                                                                                                                                                                                                                                                                                                  |
| VC_298_1  | MW862109                                                                                                                                                                                                                                                                                                                                                                                                                                                                                                                                                                                                                                                                                                                                                                                                                                                                                                                                                                                                                                                                                                                                                                                                                                                                                                                                                                                                                                                                                                                                                                                                                                                                                                                                                                                                                                                                                                                                                                                                                                                                                                                                                                                                                                                                                                                                                                                                                                                                                                                                                                                                                                                                                                                                                                                                                                                                                                                                                                                                                                                                                                                                                                                                                                                                                                                                                                                                                                                                                                                                                                                                                                                                                                                                                                                                                                                                                                                                                                                                                                                                                                                                                                                                                                                                                                                                                                                                                                                                                                                                                                                                                                                                                                                                                                                                                                                                                                                                                                                                                                                                                                                                                                                                                                                                                                                                                                                                                                                                                                                                                                                                                                                                                                                                                                                                                                                                                                                                                                                                                                                                                                                                                                                                                                                                                                                                                                                                                                                                                                                                                                                                                                                                                                                                                                                                                                                                                                                                                                                                                                                                                                                                                                                                                                                                                                                                                                                                                                                                                                                                                                                                                                                                                                                                                                                                                                                                                                                                                                                                                                                                                                                                                                                                                                                                                                                                                                                                                                                                                                                                                                                                                                                                                                                                                                                                                                                                                                                                                                                                                                                                                                                                                                                                                                                                                                                                                                                                                                                                                                                                                                                                                                                                                                                                                                                                                                                                                                                                                                                                                                                                                                                                                                                                                                                                                                                                                                                                                                                                                                                                                                                                                                                                                                                                                                                                                                                  |
| VC_299_0  | KX581090,KX581091,KX581092,KX581093,KX581094,KX581095,KX581096,KX581097,KX581098,KX581099,KX581100,KY658673,KY658674,KY658675,KY658676,KY658677,KY658678,KY658679,KY658680,MK672799,MK672800,MK672801,MK672803,MK672804                                                                                                                                                                                                                                                                                                                                                                                                                                                                                                                                                                                                                                                                                                                                                                                                                                                                                                                                                                                                                                                                                                                                                                                                                                                                                                                                                                                                                                                                                                                                                                                                                                                                                                                                                                                                                                                                                                                                                                                                                                                                                                                                                                                                                                                                                                                                                                                                                                                                                                                                                                                                                                                                                                                                                                                                                                                                                                                                                                                                                                                                                                                                                                                                                                                                                                                                                                                                                                                                                                                                                                                                                                                                                                                                                                                                                                                                                                                                                                                                                                                                                                                                                                                                                                                                                                                                                                                                                                                                                                                                                                                                                                                                                                                                                                                                                                                                                                                                                                                                                                                                                                                                                                                                                                                                                                                                                                                                                                                                                                                                                                                                                                                                                                                                                                                                                                                                                                                                                                                                                                                                                                                                                                                                                                                                                                                                                                                                                                                                                                                                                                                                                                                                                                                                                                                                                                                                                                                                                                                                                                                                                                                                                                                                                                                                                                                                                                                                                                                                                                                                                                                                                                                                                                                                                                                                                                                                                                                                                                                                                                                                                                                                                                                                                                                                                                                                                                                                                                                                                                                                                                                                                                                                                                                                                                                                                                                                                                                                                                                                                                                                                                                                                                                                                                                                                                                                                                                                                                                                                                                                                                                                                                                                                                                                                                                                                                                                                                                                                                                                                                                                                                                                                                                                                                                                                                                                                                                                                                                                                                                                                                                                                                   |
| VC_3_0    | CP000623,CP000624,CP008753,DQ087285,GU911304,HM461982,JX681814,LC528882,LC667452,MW072790,MZ375754,OM304382,OM638608,OM638609,OM638610,OM638611,ON135435                                                                                                                                                                                                                                                                                                                                                                                                                                                                                                                                                                                                                                                                                                                                                                                                                                                                                                                                                                                                                                                                                                                                                                                                                                                                                                                                                                                                                                                                                                                                                                                                                                                                                                                                                                                                                                                                                                                                                                                                                                                                                                                                                                                                                                                                                                                                                                                                                                                                                                                                                                                                                                                                                                                                                                                                                                                                                                                                                                                                                                                                                                                                                                                                                                                                                                                                                                                                                                                                                                                                                                                                                                                                                                                                                                                                                                                                                                                                                                                                                                                                                                                                                                                                                                                                                                                                                                                                                                                                                                                                                                                                                                                                                                                                                                                                                                                                                                                                                                                                                                                                                                                                                                                                                                                                                                                                                                                                                                                                                                                                                                                                                                                                                                                                                                                                                                                                                                                                                                                                                                                                                                                                                                                                                                                                                                                                                                                                                                                                                                                                                                                                                                                                                                                                                                                                                                                                                                                                                                                                                                                                                                                                                                                                                                                                                                                                                                                                                                                                                                                                                                                                                                                                                                                                                                                                                                                                                                                                                                                                                                                                                                                                                                                                                                                                                                                                                                                                                                                                                                                                                                                                                                                                                                                                                                                                                                                                                                                                                                                                                                                                                                                                                                                                                                                                                                                                                                                                                                                                                                                                                                                                                                                                                                                                                                                                                                                                                                                                                                                                                                                                                                                                                                                                                                                                                                                                                                                                                                                                                                                                                                                                                                                                                                  |
| VC_30_0   | JQ182733,JQ182734                                                                                                                                                                                                                                                                                                                                                                                                                                                                                                                                                                                                                                                                                                                                                                                                                                                                                                                                                                                                                                                                                                                                                                                                                                                                                                                                                                                                                                                                                                                                                                                                                                                                                                                                                                                                                                                                                                                                                                                                                                                                                                                                                                                                                                                                                                                                                                                                                                                                                                                                                                                                                                                                                                                                                                                                                                                                                                                                                                                                                                                                                                                                                                                                                                                                                                                                                                                                                                                                                                                                                                                                                                                                                                                                                                                                                                                                                                                                                                                                                                                                                                                                                                                                                                                                                                                                                                                                                                                                                                                                                                                                                                                                                                                                                                                                                                                                                                                                                                                                                                                                                                                                                                                                                                                                                                                                                                                                                                                                                                                                                                                                                                                                                                                                                                                                                                                                                                                                                                                                                                                                                                                                                                                                                                                                                                                                                                                                                                                                                                                                                                                                                                                                                                                                                                                                                                                                                                                                                                                                                                                                                                                                                                                                                                                                                                                                                                                                                                                                                                                                                                                                                                                                                                                                                                                                                                                                                                                                                                                                                                                                                                                                                                                                                                                                                                                                                                                                                                                                                                                                                                                                                                                                                                                                                                                                                                                                                                                                                                                                                                                                                                                                                                                                                                                                                                                                                                                                                                                                                                                                                                                                                                                                                                                                                                                                                                                                                                                                                                                                                                                                                                                                                                                                                                                                                                                                                                                                                                                                                                                                                                                                                                                                                                                                                                                                                                         |
| VC_30_1   | AF335538,AF547987,CP000711,JF974339,JN600960,KB332078,MH717096,MN340231,MT813197,MT833387,MZ043897,OM022251,ON470589,ON470594,ON470605,OV696608                                                                                                                                                                                                                                                                                                                                                                                                                                                                                                                                                                                                                                                                                                                                                                                                                                                                                                                                                                                                                                                                                                                                                                                                                                                                                                                                                                                                                                                                                                                                                                                                                                                                                                                                                                                                                                                                                                                                                                                                                                                                                                                                                                                                                                                                                                                                                                                                                                                                                                                                                                                                                                                                                                                                                                                                                                                                                                                                                                                                                                                                                                                                                                                                                                                                                                                                                                                                                                                                                                                                                                                                                                                                                                                                                                                                                                                                                                                                                                                                                                                                                                                                                                                                                                                                                                                                                                                                                                                                                                                                                                                                                                                                                                                                                                                                                                                                                                                                                                                                                                                                                                                                                                                                                                                                                                                                                                                                                                                                                                                                                                                                                                                                                                                                                                                                                                                                                                                                                                                                                                                                                                                                                                                                                                                                                                                                                                                                                                                                                                                                                                                                                                                                                                                                                                                                                                                                                                                                                                                                                                                                                                                                                                                                                                                                                                                                                                                                                                                                                                                                                                                                                                                                                                                                                                                                                                                                                                                                                                                                                                                                                                                                                                                                                                                                                                                                                                                                                                                                                                                                                                                                                                                                                                                                                                                                                                                                                                                                                                                                                                                                                                                                                                                                                                                                                                                                                                                                                                                                                                                                                                                                                                                                                                                                                                                                                                                                                                                                                                                                                                                                                                                                                                                                                                                                                                                                                                                                                                                                                                                                                                                                                                                                                                           |
| VC_300_0  | HQ141411,MG788324,OP650937                                                                                                                                                                                                                                                                                                                                                                                                                                                                                                                                                                                                                                                                                                                                                                                                                                                                                                                                                                                                                                                                                                                                                                                                                                                                                                                                                                                                                                                                                                                                                                                                                                                                                                                                                                                                                                                                                                                                                                                                                                                                                                                                                                                                                                                                                                                                                                                                                                                                                                                                                                                                                                                                                                                                                                                                                                                                                                                                                                                                                                                                                                                                                                                                                                                                                                                                                                                                                                                                                                                                                                                                                                                                                                                                                                                                                                                                                                                                                                                                                                                                                                                                                                                                                                                                                                                                                                                                                                                                                                                                                                                                                                                                                                                                                                                                                                                                                                                                                                                                                                                                                                                                                                                                                                                                                                                                                                                                                                                                                                                                                                                                                                                                                                                                                                                                                                                                                                                                                                                                                                                                                                                                                                                                                                                                                                                                                                                                                                                                                                                                                                                                                                                                                                                                                                                                                                                                                                                                                                                                                                                                                                                                                                                                                                                                                                                                                                                                                                                                                                                                                                                                                                                                                                                                                                                                                                                                                                                                                                                                                                                                                                                                                                                                                                                                                                                                                                                                                                                                                                                                                                                                                                                                                                                                                                                                                                                                                                                                                                                                                                                                                                                                                                                                                                                                                                                                                                                                                                                                                                                                                                                                                                                                                                                                                                                                                                                                                                                                                                                                                                                                                                                                                                                                                                                                                                                                                                                                                                                                                                                                                                                                                                                                                                                                                                                                                                |
| VC_301_0  | LT985589,LT993247                                                                                                                                                                                                                                                                                                                                                                                                                                                                                                                                                                                                                                                                                                                                                                                                                                                                                                                                                                                                                                                                                                                                                                                                                                                                                                                                                                                                                                                                                                                                                                                                                                                                                                                                                                                                                                                                                                                                                                                                                                                                                                                                                                                                                                                                                                                                                                                                                                                                                                                                                                                                                                                                                                                                                                                                                                                                                                                                                                                                                                                                                                                                                                                                                                                                                                                                                                                                                                                                                                                                                                                                                                                                                                                                                                                                                                                                                                                                                                                                                                                                                                                                                                                                                                                                                                                                                                                                                                                                                                                                                                                                                                                                                                                                                                                                                                                                                                                                                                                                                                                                                                                                                                                                                                                                                                                                                                                                                                                                                                                                                                                                                                                                                                                                                                                                                                                                                                                                                                                                                                                                                                                                                                                                                                                                                                                                                                                                                                                                                                                                                                                                                                                                                                                                                                                                                                                                                                                                                                                                                                                                                                                                                                                                                                                                                                                                                                                                                                                                                                                                                                                                                                                                                                                                                                                                                                                                                                                                                                                                                                                                                                                                                                                                                                                                                                                                                                                                                                                                                                                                                                                                                                                                                                                                                                                                                                                                                                                                                                                                                                                                                                                                                                                                                                                                                                                                                                                                                                                                                                                                                                                                                                                                                                                                                                                                                                                                                                                                                                                                                                                                                                                                                                                                                                                                                                                                                                                                                                                                                                                                                                                                                                                                                                                                                                                                                                         |
| VC_302_0  | MH837542,MH837543                                                                                                                                                                                                                                                                                                                                                                                                                                                                                                                                                                                                                                                                                                                                                                                                                                                                                                                                                                                                                                                                                                                                                                                                                                                                                                                                                                                                                                                                                                                                                                                                                                                                                                                                                                                                                                                                                                                                                                                                                                                                                                                                                                                                                                                                                                                                                                                                                                                                                                                                                                                                                                                                                                                                                                                                                                                                                                                                                                                                                                                                                                                                                                                                                                                                                                                                                                                                                                                                                                                                                                                                                                                                                                                                                                                                                                                                                                                                                                                                                                                                                                                                                                                                                                                                                                                                                                                                                                                                                                                                                                                                                                                                                                                                                                                                                                                                                                                                                                                                                                                                                                                                                                                                                                                                                                                                                                                                                                                                                                                                                                                                                                                                                                                                                                                                                                                                                                                                                                                                                                                                                                                                                                                                                                                                                                                                                                                                                                                                                                                                                                                                                                                                                                                                                                                                                                                                                                                                                                                                                                                                                                                                                                                                                                                                                                                                                                                                                                                                                                                                                                                                                                                                                                                                                                                                                                                                                                                                                                                                                                                                                                                                                                                                                                                                                                                                                                                                                                                                                                                                                                                                                                                                                                                                                                                                                                                                                                                                                                                                                                                                                                                                                                                                                                                                                                                                                                                                                                                                                                                                                                                                                                                                                                                                                                                                                                                                                                                                                                                                                                                                                                                                                                                                                                                                                                                                                                                                                                                                                                                                                                                                                                                                                                                                                                                                                                         |
| VC_303_0  | AF176027,AF176028,AF176029,AF176030,AF176031,AF176032,AF176033,AF176034,AF274751,AF299300,AF299301,AF299302,AF299303,AF299304,AF299305,AF299306,AF299307,AF299308,AF299309,AF299310,AF299311,AF299312,AF299313,AF299314,CP004084,DQ079880,DQ079881,DQ079882,DQ079883,DQ079884,DQ079885,DQ079886,DQ079887,DQ079888,DQ079889,DQ079890,DQ079891,DQ079892,DQ079893,DQ079894,DQ079895,EF380009,EF380010,EF380011,EF380012,EF380013,EF380014,EF380015,EF380016,EF380017,EF380018,EF380019,EF380020,EF380021,EF380022,EF380023,EF380024,EF380025,EF380026,EF380027,EF380028,EF380029,EF380030,EF380031,EF380032,EF380033,EF380034,EF380035,EF380036,EF380037,EF380038,EF380039,EF380040,EF380041,EF380042,EF380043,EF380044,EF380045,EF380046,EF380047,EF380048,EF380049,EF380050,EF380051,EF380052,EF380053,EF380054,EF380055,EF380056,EF380057,EF380058,EF380059,EF380060,EF380061,EF380062,EF380063,EF380064,EF380065,EF380066,EF380067,EF380068,EF380069,EF380070,EF380071,EF380072,EF380073,EF380074,EF380075,EF380076,EF380077,EF380078,EF380079,EF380080,EF380081,EF380082,EF380083,EF380084,EF380085,EF380086,EF380087,EF380088,EF380089,EF380090,EF380091,EF380092,EF380093,EF380094,EF380095,EF380096,EF380097,EF380098,EF380099,EF380100,EF380101,EF380102,EF380103,EF380104,EF380105,EF380106,EF380107,EF380108,EF380109,EF380110,EF380111,EF380112,EF380113,EF380114,EF380115,EF380116,EF380117,EF380118,EF380119,EF380120,EF380121,EF380122,EF380123,EF380124,EF380125,EF380126,EF380127,EF380128,EF380129,EF380130,EF380131,EF380132,EF380133,EF380134,EF380135,EF380136,EF380137,EF380138,EF380139,EF380140,EF380141,EF380142,EF380143,EF380144,EF380145,EF380146,EF380147,EF380148,EF380149,EF380150,EF380151,EF380152,EF380153,EF380154,EF380155,EF380156,EF380157,EF380158,EF380159,EF380160,EF380161,EF380162,EF380163,EF380164,EF380165,EF380166,EF380167,EF380168,EF380169,EF380170,EF380171,EF380172,EF380173,EF380174,EF380175,EF380176,EF380177,EF380178,EF380179,EF380180,EF380181,EF380182,EF380183,EF380184,EF380185,EF380186,EF380187,EF380188,EF380189,EF380190,EF380191,EF380192,EF380193,EF380194,EF380195,EF380196,EF380197,EF380198,EF380199,EF380200,EF380201,EF380202,EF380203,EF380204,EF380205,EF380206,EF380207,EF380208,EF380209,EF380210,EF380211,EF380212,EF380213,EF380214,EF380215,EF380216,EF380217,EF380218,EF380219,EF380220,EF380221,EF380222,EF380223,EF380224,EF380225,EF380226,EF380227,EF380228,EF380229,EF380230,EF380231,EF380232,EF380233,EF380234,EF380235,EF380236,EF380237,EF380238,EF380239,EF380240,EF380241,EF380242,EF380243,EF380244,EF380245,EF380246,EF380247,EF380248,EF380249,EF380250,EF380251,EF380252,EF380253,EF380254,EF380255,EF380256,EF380257,EF380258,EF380259,EF380260,EF380261,EF380262,EF380263,EF380264,EF380265,EF380266,EF380267,EF380268,EF380269,EF380270,EF380271,EF380272,EF380273,EF380274,EF380275,EF380276,EF380277,EF380278,EF380279,EF380280,EF380281,EF380282,EF380283,EF380284,EF380285,EF380286,EF380287,EF380288,EF380289,EF380290,EF380291,EF380292,EF380293,EF380294,EF380295,EF380296,EF380297,EF380298,EF380299,EF380300,EF380301,EF380302,EF380303,EF380304,EF380305,EF380306,EF380307,EF380308,EF380309,EF380310,EF380311,EF380312,EF380313,EF380314,EF380315,EF380316,EF380317,EF380318,EF380319,EF380320,EF380321,EF380322,EF380323,EF380324,EF380325,EF380326,EF380327,EF380328,EF380329,EF380330,EF380331,EF380332,EF380333,EF380334,EF380335,EF380336,EF380337,EF380338,EF380339,EF380340,EF380341,EF380342,EF380343,EF380344,EF380345,EF380346,EF380347,EF380348,EF380349,EF380350,EF380351,EF380352,EF380353,EF380354,EF380355,EF380356,EF380357,EF380358,EF380359,EF380360,EF380361,EF380362,EF380363,EF380364,EF380365,EF380366,EF380367,EF380368,EF380369,EF380370,EF380371,EF380372,EF380373,EF380374,EF380375,EF380376,EF380377,EF380378,EF380379,EF380380,EF380381,EF380382,EF380383,EF380384,EF380385,EF380386,EF380387,EF380388,EF380389,EF380390,EF380391,EF380392,EF380393,EF380394,EF380395,EF380396,EF380397,EF380398,EF380399,EF380400,EF380401,EF380402,EF380403,EF380404,EF380405,EF380406,EF380407,EF380408,EF380409,EF380410,EF380411,EF380412,EF380413,EF380414,EF380415,EF380416,EF380417,EF380418,EF380419,EF380420,EF380421,EF380422,EF380423,EF380424,EF380425,EF380426,EF380427,EF380428,EF380429,EF380430,EF380431,EF380432,EF380433,EF380434,EF380435,EF380436,EF380437,EF380438,EF380439,EF380440,EF380441,EF380442,EF380443,EF380444,EF380445,EF380446,EF380447,EF380448,EF380449,EF380450,EF380451,EF380452,EF380453,EF380454,EF380455,EF380456,EF380457,EF380458,EF380459,EF380460,EF380461,EF380462,EF380463,EF380464,EF380465,EF380466,EF380467,EF380468,EF380469,EF380470,EF380471,EF380472,EF380473,EF380474,EF380475,EF380476,EF380477,EF380478,EF380479,EF380480,EF380481,EF380482,EF380483,EF380484,EF380485,EF380486,EF380487,EF380488,EF380489,EF380490,EF380491,EF380492,EF380493,EF380494,EF380495,EF380496,EF380497,EF380498,EF380499,EF380500,EF380501,EF380502,EF380503,EF380504,EF380505,EF380506,EF380507,EF380508,EF380509,EF380510,EF380511,EF380512,EF380513,EF380514,EF380515,EF380516,EF380517,EF380518,EF380519,EF380520,EF380521,EF380522,EF380523,EF380524,EF380525,EF380526,EF380527,EF380528,EF380529,EF380530,EF380531,EF380532,EF380533,EF380534,EF380535,EF380536,EF380537,EF380538,EF380539,EF380540,EF380541,EF380542,EF380543,EF380544,EF380545,EF380546,EF380547,EF380548,EF380549,EF380550,EF380551,EF380552,EF380553,EF380554,EF380555,EF380556,EF380557,EF380558,EF380559,EF380560,EF380561,EF380562,EF380563,EF380564,EF380565,EF380566,EF380567,EF380568,EF380569,EF380570,EF380571,EF380572,EF380573,EF380574,EF380575,EF380576,EF380577,EF380578,EF380579,EF380580,EF380581,EF380582,EF380583,EF380584,EF380585,EF380586,EF380587,EF380588,EF380589,EF380590,EF380591,EF380592,EF380593,EF380594,EF380595,EF380596,EF380597,EF380598,EF380599,EF380600,EF380601,EF380602,EF380603,EF380604,EF380605,EF380606,EF380607,EF380608,EF380609,EF380610,EF380611,EF380612,EF380613,EF380614,EF380615,EF380616,EF380617,EF380618,EF380619,EF380620,EF380621,EF380622,EF380623,EF380624,EF380625,EF380626,EF380627,EF380628,EF380629,EF380630,EF380631,EF380632,EF380633,EF380634,EF380635,EF380636,EF380637,EF380638,EF380639,EF380640,EF380641,EF380642,EF380643,EF380644,EF380645,EF380646,EF380647,EF380648,EF380649,EF380650,EF380651,EF380652,EF380653,EF380654,EF380655,EF380656,EF380657,EF380658,EF380659,EF380660,EF380661,EF380662,EF380663,EF380664,EF380665,EF380666,EF380667,EF380668,EF380669,EF380670,EF380671,EF380672,EF380673,EF380674,EF380675,EF380676,EF380677,EF380678,EF380679,EF380680,EF380681,EF380682,EF380683,EF380684,EF380685,EF380686,EF380687,EF380688,EF380689,EF380690,EF380691,EF380692,EF380693,EF380694,EF380695,EF380696,EF380697,EF380698,EF380699,EF380700,EF380701,EF380702,EF380703,EF380704,EF380705,EF380706,EF380707,EF380708,EF380709,EF380710,EF380711,EF380712,EF380713,EF380714,EF380715,EF380716,EF380717,EF380718,EF380719,EF380720,EF380721,EF380722,EF380723,EF380724,EF380725,EF380726,EF380727,EF380728,EF380729,EF380730,EF380731,EF380732,EF380733,EF380734,EF380735,EF380736,EF380737,EF380738,EF380739,EF380740,EF380741,EF380742,EF380743,EF380744,EF380745,EF380746,EF380747,EF380748,EF380749,EF380750,EF380751,EF380752,EF380753,EF380754,EF380755,EF380756,EF380757,EF380758,EF380759,EF380760,EF380761,EF380762,EF380763,EF380764,EF380765,EF380766,EF380767,EF380768,EF380769,EF380770,EF380771,EF380772,EF380773,EF380774,EF380775,EF380776,EF380777,EF380778,EF380779,EF380780,EF380781,EF380782,EF380783,EF380784,EF380785,EF380786,EF380787,EF380788,EF380789,EF380790,EF380791,EF380792,EF380793,EF380794,EF380795,EF380796,EF380797,EF380798,EF380799,EF380800,EF380801,EF380802,EF380803,EF380804,EF380805,EF380806,EF380807,EF380808,EF380809,EF380810,EF380811,EF380812,EF380813,EF380814,EF380815,EF380816,EF380817,EF380818,EF380819,EF380820,EF380821,EF380822,EF380823,EF380824,EF380825,EF380826,EF380827,EF380828,EF380829,EF380830,EF380831,EF380832,EF380833,EF380834,EF380835,EF380836,EF380837,EF380838,EF380839,EF380840,EF380841,EF380842,EF380843,EF380844,EF380845,EF380846,EF380847,EF380848,EF380849,EF380850,EF380851,EF380852,EF380853,EF380854,EF380855,EF380856,EF380857,EF380858,EF380859,EF380860,EF380861,EF380862,EF380863,EF380864,EF380865,EF380866,EF380867,EF380868,EF380869,EF380870,EF380871,EF380872,EF380873,EF380874,EF380875,EF380876,EF380877,EF380878,EF380879,EF380880,EF380881,EF380882,EF380883,EF380884,EF380885,EF380886,EF380887,EF380888,EF380889,EF380890,EF380891,EF380892,EF380893,EF380894,EF380895,EF380896,EF380897,EF380898,EF380899,EF380900,EF380901,EF380902,EF380903,EF380904,EF380905,EF380906,EF380907,EF380908,EF380909,EF380910,EF380911,EF380912,EF380913,EF380914,EF380915,EF380916,EF380917,EF380918,EF380919,EF380920,EF380921,EF380922,EF380923,EF380924,EF380925,EF380926,EF380927,EF380928,EF380929,EF380930,EF380931,EF380932,EF380933,EF380934,EF380935,EF380936,EF380937,EF380938,EF380939,EF380940,EF380941,EF380942,EF380943,EF380944,EF380945,EF380946,EF380947,EF380948,EF380949,EF380950,EF380951,EF380952,EF380953,EF380954,EF380955,EF380956,EF380957,EF380958,EF380959,EF380960,EF380961,EF380962,EF380963,EF380964,EF380965,EF380966,EF380967,EF380968,EF380969,EF380970,EF380971,EF380972,EF380973,EF380974,EF380975,EF380976,EF380977,EF380978,EF380979,EF380980,EF380981,EF380982,EF380983,EF380984,EF380985,EF380986,EF380987,EF380988,EF380989,EF380990,EF380991,EF380992,EF380993,EF380994,EF380995,EF380996,EF380997,EF380998,EF380999,EF381000,EF381001,EF381002,EF381003,EF381004,EF381005,EF381006,EF381007,EF381008,EF381009,EF381010,EF381011,EF381012,EF381013,EF381014,EF381015,EF381016,EF381017,EF381018,EF381019,EF381020,EF381021,EF381022,EF381023,EF381024,EF381025,EF381026,EF381027,EF381028,EF381029,EF381030,EF381031,EF381032,EF381033,EF381034,EF381035,EF381036,EF381037,EF381038,EF381039,EF381040,EF381041,EF381042,EF381043,EF381044,EF381045,EF381046,EF381047,EF381048,EF381049,EF381050,EF381051,EF381052,EF381053,EF381054,EF381055,EF381056,EF381057,EF381058,EF381059,EF381060,EF381061,EF381062,EF381063,EF381064,EF381065,EF381066,EF381067,EF381068,EF381069,EF381070,EF381071,EF381072,EF381073,EF381074,EF381075,EF381076,EF381077,EF381078,EF381079,EF381080,EF381081,EF381082,EF381083,EF381084,EF381085,EF381086,EF381087,EF381088,EF381089,EF381090,EF381091,EF381092,EF381093,EF381094,EF381095,EF381096,EF381097,EF381098,EF381099,EF381100,EF381101,EF381102,EF381103,EF381104,EF381105,EF381106,EF381107,EF381108,EF381109,EF381110,EF381111,EF381112,EF381113,EF381114,EF381115,EF381116,EF381117,EF381118,EF381119,EF381120,EF381121,EF381122,EF381123,EF381124,EF381125,EF3 |



|           |                                                                                                                                                                                     |
|-----------|-------------------------------------------------------------------------------------------------------------------------------------------------------------------------------------|
| VC_317_1  | MK448706,MK448721                                                                                                                                                                   |
| VC_317_2  | AY007505,FR671408,FR671409,KC348600,KC348601,KC348602,KT337360,KX077894,KY065485,KY065503,KY065504,MK448814,MK448881,MK448882,MK448896,MK448909,MK448988,MK448989,OL774869,OL774877 |
| VC_317_3  | KP208803                                                                                                                                                                            |
| VC_317_4  | MK448900                                                                                                                                                                            |
| VC_318_0  | KY065466,KY065468,MK448982                                                                                                                                                          |
| VC_32_0   | MH443100                                                                                                                                                                            |
| VC_323_0  | MK448821,MK448822                                                                                                                                                                   |
| VC_323_1  | KY065498,MK448735,MK448757,MK448758,MK448759,MK448893,MK448915,MK448939,OL774872                                                                                                    |
| VC_325_0  | MH513971,ON970586                                                                                                                                                                   |
| VC_325_1  | JN398369,MN617845                                                                                                                                                                   |
| VC_325_10 | MH744414,MK359331,MN119379                                                                                                                                                          |
| VC_325_11 | MH001458                                                                                                                                                                            |
| VC_325_12 | MN813700                                                                                                                                                                            |
| VC_325_13 | EU744249,EU744252                                                                                                                                                                   |
| VC_325_14 | GU247132,KT818595,MT889384                                                                                                                                                          |
| VC_325_15 | KJ174156                                                                                                                                                                            |
| VC_325_16 | MK310141,MK524523                                                                                                                                                                   |
| VC_325_17 | KC701493                                                                                                                                                                            |
| VC_325_18 | OL549190                                                                                                                                                                            |
| VC_325_19 | JN020140,MH338238,MK967387                                                                                                                                                          |
| VC_325_2  | JF937099                                                                                                                                                                            |
| VC_325_20 | MN585970                                                                                                                                                                            |
| VC_325_21 | EU744248,KX522649,KX522943,KX574454,MK524497                                                                                                                                        |
| VC_325_22 | MK524499                                                                                                                                                                            |
| VC_325_23 | JF937103,KC661273,KT259047,MC920060,MC925351,MH020244,MH450113,MH450130,MH576959,MH576971,MH576974,MK359299,MK820638,MT639654,MW507123,MW712732,ON970627                            |
| VC_325_24 | JF957057,MH230876,MN585976                                                                                                                                                          |
| VC_325_25 | MZ648034                                                                                                                                                                            |
| VC_325_26 | MG944220                                                                                                                                                                            |
| VC_325_27 | MH536816,MH632118                                                                                                                                                                   |
| VC_325_28 | KX369584                                                                                                                                                                            |
| VC_325_29 | KP027196,KP027203,MW862983                                                                                                                                                          |
| VC_325_3  | KF493880                                                                                                                                                                            |
| VC_325_30 | KJ409696,KT326768,MK494116,OK040791                                                                                                                                                 |
| VC_325_31 | MK814754                                                                                                                                                                            |
| VC_325_32 | MW435858                                                                                                                                                                            |
| VC_325_33 | KF560331,MK112532,MK359316,OM203162                                                                                                                                                 |
| VC_325_34 | ON677304                                                                                                                                                                            |
| VC_325_35 | EUR26470,JN572689,JQ698665,JQ809703,KF024724,KF279415,KF279416,KM597531,KR080201,MF668283,MK359312,MK524506,MK524531,MN428054,MN586000,MT657342,MZ322004                            |
| VC_325_36 | MH371110,MN369760                                                                                                                                                                   |
| VC_325_37 | MK061415,MN585985,MT776812                                                                                                                                                          |
| VC_325_38 | KX683876,KX702320,MC909951,MH000606,MH651180,MT952847                                                                                                                               |
| VC_325_39 | AF271693,MZ355726                                                                                                                                                                   |
| VC_325_4  | KX369586                                                                                                                                                                            |
| VC_325_40 | KP027205,MH697581                                                                                                                                                                   |
| VC_325_41 | JF937100,MK112530                                                                                                                                                                   |
| VC_325_42 | JN699016,JX307705,KT363731,MN119377                                                                                                                                                 |
| VC_325_43 | KX712238                                                                                                                                                                            |
| VC_325_44 | EU744251,JN660814,MH669011                                                                                                                                                          |
| VC_325_45 | MK524525                                                                                                                                                                            |
| VC_325_46 | MH576975,MK967401                                                                                                                                                                   |
| VC_325_47 | JN699000,MC962370                                                                                                                                                                   |
| VC_325_48 | KY213952,MK112540                                                                                                                                                                   |
| VC_325_49 | AP018477,AP018478,KF416340,MH632117                                                                                                                                                 |
| VC_325_5  | AY500152,JF937108,JF937110,KJ194585,KT626047,MG872833,MC925344,MC962372,MK359354,MN585999,MT310897                                                                                  |
| VC_325_50 | MG812486,MG812489,MG812495,MC872836                                                                                                                                                 |
| VC_325_51 | KJ690250,MN585991                                                                                                                                                                   |
| VC_325_52 | JN153085,MH230878,MH697575,MN062710,MN234212                                                                                                                                        |
| VC_325_53 | KT388014,KX550443,MH020236,MH399782,MH590595,MK359300,MK359304                                                                                                                      |
| VC_325_54 | KY224001                                                                                                                                                                            |
| VC_325_55 | MK305893,MZ355722                                                                                                                                                                   |
| VC_325_56 | MF919508,MN585997                                                                                                                                                                   |
| VC_325_57 | ON208829                                                                                                                                                                            |
| VC_325_58 | ON970624                                                                                                                                                                            |
| VC_325_59 | MT771340                                                                                                                                                                            |
| VC_325_6  | MN444869                                                                                                                                                                            |
| VC_325_60 | JN687951,MH338239                                                                                                                                                                   |
| VC_325_61 | JN153086,JN698998,MC925340,MC925342,MH450133,MH479919,MK310142,MT639644                                                                                                             |
| VC_325_62 | OL455898,OM105884,OP021677                                                                                                                                                          |
| VC_325_7  | KR997929,KR997934,MC944221                                                                                                                                                          |
| VC_325_8  | KF024726,KP027204                                                                                                                                                                   |
| VC_325_9  | AY500153,KT438500                                                                                                                                                                   |
| VC_326_0  | MW202895                                                                                                                                                                            |
| VC_327_0  | AF306496,MH992158,MH992160,MH992177,MH992178,MH992189,MH992191,MH992194,MH992197,MH992207,MH992218,MW202535                                                                         |
| VC_328_0  | EU710883,FQ482083,HQ728263,MG589384,MH426725,MK759884,MK770412,MN604407,OK483342,OM522317,ON706965                                                                                  |
| VC_329_0  | MG646672,MH586731                                                                                                                                                                   |
| VC_329_1  | AF320576,JF461087,JX181822,KP143762,KY626162,MF370225,MC251391,MC251392,MC969405,MC969406,MK965970,MW006474,MW006475,MW006482,MZ327261,MZ327262                                     |



|           |                                                                                                                                                                                                                                                                                                                                                                                                                                                                                                                                                                                                                                                                                                                                                                                                                                                                                                                                                                                                                                                                                                                                                                                                                                                                                                                                                                                                                                                                                                                                                                                                                                                                                                                                                                                                                                                                                                                                                                                                                                                                                                                                                                                                                                                                                                                                                                                                                                                                                                                                                                                                                                                                                                                                                                                                                                                                                                                                                                                                                                                                                                                                                                                                                                                                                                                                                                                                                                                                                                                                                                                                                                                                                                                                                                                                                                                                                                                                                                                                                                                                                                                                                                                                                                                                                                                                                                                                                                                                                                                                                                                                                                                                                                                                                                                                                                                                                                                                                                                                                                                                                                                                                                                                                                                                                                                                                                                                                                                                                                                                                                                                                                                                                                                                                                                                                                                                                                                                                                                                                                                                                                                                                                                                                                                                                                                                                                                                                                                                                                                                                                                                                                                                                                                                                                                                                                                                                                                                                                                                                                                                                                                                                                                                                                                                                                                                                                                                                                                                                                                                                                                                                                                                                                                                                                                                                                                                                                                                                                                                                                                                                                                                                                                                                                                                                                                                                                                                                                                                                                                                                                                                                                                                                                                                                                                                                                                                                                                                                                                                                                                                                                                                                                                                                                                                                                                                                         |
|-----------|---------------------------------------------------------------------------------------------------------------------------------------------------------------------------------------------------------------------------------------------------------------------------------------------------------------------------------------------------------------------------------------------------------------------------------------------------------------------------------------------------------------------------------------------------------------------------------------------------------------------------------------------------------------------------------------------------------------------------------------------------------------------------------------------------------------------------------------------------------------------------------------------------------------------------------------------------------------------------------------------------------------------------------------------------------------------------------------------------------------------------------------------------------------------------------------------------------------------------------------------------------------------------------------------------------------------------------------------------------------------------------------------------------------------------------------------------------------------------------------------------------------------------------------------------------------------------------------------------------------------------------------------------------------------------------------------------------------------------------------------------------------------------------------------------------------------------------------------------------------------------------------------------------------------------------------------------------------------------------------------------------------------------------------------------------------------------------------------------------------------------------------------------------------------------------------------------------------------------------------------------------------------------------------------------------------------------------------------------------------------------------------------------------------------------------------------------------------------------------------------------------------------------------------------------------------------------------------------------------------------------------------------------------------------------------------------------------------------------------------------------------------------------------------------------------------------------------------------------------------------------------------------------------------------------------------------------------------------------------------------------------------------------------------------------------------------------------------------------------------------------------------------------------------------------------------------------------------------------------------------------------------------------------------------------------------------------------------------------------------------------------------------------------------------------------------------------------------------------------------------------------------------------------------------------------------------------------------------------------------------------------------------------------------------------------------------------------------------------------------------------------------------------------------------------------------------------------------------------------------------------------------------------------------------------------------------------------------------------------------------------------------------------------------------------------------------------------------------------------------------------------------------------------------------------------------------------------------------------------------------------------------------------------------------------------------------------------------------------------------------------------------------------------------------------------------------------------------------------------------------------------------------------------------------------------------------------------------------------------------------------------------------------------------------------------------------------------------------------------------------------------------------------------------------------------------------------------------------------------------------------------------------------------------------------------------------------------------------------------------------------------------------------------------------------------------------------------------------------------------------------------------------------------------------------------------------------------------------------------------------------------------------------------------------------------------------------------------------------------------------------------------------------------------------------------------------------------------------------------------------------------------------------------------------------------------------------------------------------------------------------------------------------------------------------------------------------------------------------------------------------------------------------------------------------------------------------------------------------------------------------------------------------------------------------------------------------------------------------------------------------------------------------------------------------------------------------------------------------------------------------------------------------------------------------------------------------------------------------------------------------------------------------------------------------------------------------------------------------------------------------------------------------------------------------------------------------------------------------------------------------------------------------------------------------------------------------------------------------------------------------------------------------------------------------------------------------------------------------------------------------------------------------------------------------------------------------------------------------------------------------------------------------------------------------------------------------------------------------------------------------------------------------------------------------------------------------------------------------------------------------------------------------------------------------------------------------------------------------------------------------------------------------------------------------------------------------------------------------------------------------------------------------------------------------------------------------------------------------------------------------------------------------------------------------------------------------------------------------------------------------------------------------------------------------------------------------------------------------------------------------------------------------------------------------------------------------------------------------------------------------------------------------------------------------------------------------------------------------------------------------------------------------------------------------------------------------------------------------------------------------------------------------------------------------------------------------------------------------------------------------------------------------------------------------------------------------------------------------------------------------------------------------------------------------------------------------------------------------------------------------------------------------------------------------------------------------------------------------------------------------------------------------------------------------------------------------------------------------------------------------------------------------------------------------------------------------------------------------------------------------------------------------------------------------------------------------------------------------------------------------------------------------------------------------------------------------------------------------------------------------------------------------------------------------------------------------------------------------------------------------------------------------------------------------------------------------------------------------------|
| VC_329_10 | MN994498                                                                                                                                                                                                                                                                                                                                                                                                                                                                                                                                                                                                                                                                                                                                                                                                                                                                                                                                                                                                                                                                                                                                                                                                                                                                                                                                                                                                                                                                                                                                                                                                                                                                                                                                                                                                                                                                                                                                                                                                                                                                                                                                                                                                                                                                                                                                                                                                                                                                                                                                                                                                                                                                                                                                                                                                                                                                                                                                                                                                                                                                                                                                                                                                                                                                                                                                                                                                                                                                                                                                                                                                                                                                                                                                                                                                                                                                                                                                                                                                                                                                                                                                                                                                                                                                                                                                                                                                                                                                                                                                                                                                                                                                                                                                                                                                                                                                                                                                                                                                                                                                                                                                                                                                                                                                                                                                                                                                                                                                                                                                                                                                                                                                                                                                                                                                                                                                                                                                                                                                                                                                                                                                                                                                                                                                                                                                                                                                                                                                                                                                                                                                                                                                                                                                                                                                                                                                                                                                                                                                                                                                                                                                                                                                                                                                                                                                                                                                                                                                                                                                                                                                                                                                                                                                                                                                                                                                                                                                                                                                                                                                                                                                                                                                                                                                                                                                                                                                                                                                                                                                                                                                                                                                                                                                                                                                                                                                                                                                                                                                                                                                                                                                                                                                                                                                                                                                                |
| VC_329_11 | KP010413,MG646669,MG646670,MG646671,MN227145,MN481367,MN655999,MW311372,MW321605,MW362867,MZ150758,OL474141,OL800606,OL825705,ON239128                                                                                                                                                                                                                                                                                                                                                                                                                                                                                                                                                                                                                                                                                                                                                                                                                                                                                                                                                                                                                                                                                                                                                                                                                                                                                                                                                                                                                                                                                                                                                                                                                                                                                                                                                                                                                                                                                                                                                                                                                                                                                                                                                                                                                                                                                                                                                                                                                                                                                                                                                                                                                                                                                                                                                                                                                                                                                                                                                                                                                                                                                                                                                                                                                                                                                                                                                                                                                                                                                                                                                                                                                                                                                                                                                                                                                                                                                                                                                                                                                                                                                                                                                                                                                                                                                                                                                                                                                                                                                                                                                                                                                                                                                                                                                                                                                                                                                                                                                                                                                                                                                                                                                                                                                                                                                                                                                                                                                                                                                                                                                                                                                                                                                                                                                                                                                                                                                                                                                                                                                                                                                                                                                                                                                                                                                                                                                                                                                                                                                                                                                                                                                                                                                                                                                                                                                                                                                                                                                                                                                                                                                                                                                                                                                                                                                                                                                                                                                                                                                                                                                                                                                                                                                                                                                                                                                                                                                                                                                                                                                                                                                                                                                                                                                                                                                                                                                                                                                                                                                                                                                                                                                                                                                                                                                                                                                                                                                                                                                                                                                                                                                                                                                                                                                  |
| VC_329_12 | MG065664,OK272472                                                                                                                                                                                                                                                                                                                                                                                                                                                                                                                                                                                                                                                                                                                                                                                                                                                                                                                                                                                                                                                                                                                                                                                                                                                                                                                                                                                                                                                                                                                                                                                                                                                                                                                                                                                                                                                                                                                                                                                                                                                                                                                                                                                                                                                                                                                                                                                                                                                                                                                                                                                                                                                                                                                                                                                                                                                                                                                                                                                                                                                                                                                                                                                                                                                                                                                                                                                                                                                                                                                                                                                                                                                                                                                                                                                                                                                                                                                                                                                                                                                                                                                                                                                                                                                                                                                                                                                                                                                                                                                                                                                                                                                                                                                                                                                                                                                                                                                                                                                                                                                                                                                                                                                                                                                                                                                                                                                                                                                                                                                                                                                                                                                                                                                                                                                                                                                                                                                                                                                                                                                                                                                                                                                                                                                                                                                                                                                                                                                                                                                                                                                                                                                                                                                                                                                                                                                                                                                                                                                                                                                                                                                                                                                                                                                                                                                                                                                                                                                                                                                                                                                                                                                                                                                                                                                                                                                                                                                                                                                                                                                                                                                                                                                                                                                                                                                                                                                                                                                                                                                                                                                                                                                                                                                                                                                                                                                                                                                                                                                                                                                                                                                                                                                                                                                                                                                                       |
| VC_329_13 | KM657822                                                                                                                                                                                                                                                                                                                                                                                                                                                                                                                                                                                                                                                                                                                                                                                                                                                                                                                                                                                                                                                                                                                                                                                                                                                                                                                                                                                                                                                                                                                                                                                                                                                                                                                                                                                                                                                                                                                                                                                                                                                                                                                                                                                                                                                                                                                                                                                                                                                                                                                                                                                                                                                                                                                                                                                                                                                                                                                                                                                                                                                                                                                                                                                                                                                                                                                                                                                                                                                                                                                                                                                                                                                                                                                                                                                                                                                                                                                                                                                                                                                                                                                                                                                                                                                                                                                                                                                                                                                                                                                                                                                                                                                                                                                                                                                                                                                                                                                                                                                                                                                                                                                                                                                                                                                                                                                                                                                                                                                                                                                                                                                                                                                                                                                                                                                                                                                                                                                                                                                                                                                                                                                                                                                                                                                                                                                                                                                                                                                                                                                                                                                                                                                                                                                                                                                                                                                                                                                                                                                                                                                                                                                                                                                                                                                                                                                                                                                                                                                                                                                                                                                                                                                                                                                                                                                                                                                                                                                                                                                                                                                                                                                                                                                                                                                                                                                                                                                                                                                                                                                                                                                                                                                                                                                                                                                                                                                                                                                                                                                                                                                                                                                                                                                                                                                                                                                                                |
| VC_329_14 | MG969404                                                                                                                                                                                                                                                                                                                                                                                                                                                                                                                                                                                                                                                                                                                                                                                                                                                                                                                                                                                                                                                                                                                                                                                                                                                                                                                                                                                                                                                                                                                                                                                                                                                                                                                                                                                                                                                                                                                                                                                                                                                                                                                                                                                                                                                                                                                                                                                                                                                                                                                                                                                                                                                                                                                                                                                                                                                                                                                                                                                                                                                                                                                                                                                                                                                                                                                                                                                                                                                                                                                                                                                                                                                                                                                                                                                                                                                                                                                                                                                                                                                                                                                                                                                                                                                                                                                                                                                                                                                                                                                                                                                                                                                                                                                                                                                                                                                                                                                                                                                                                                                                                                                                                                                                                                                                                                                                                                                                                                                                                                                                                                                                                                                                                                                                                                                                                                                                                                                                                                                                                                                                                                                                                                                                                                                                                                                                                                                                                                                                                                                                                                                                                                                                                                                                                                                                                                                                                                                                                                                                                                                                                                                                                                                                                                                                                                                                                                                                                                                                                                                                                                                                                                                                                                                                                                                                                                                                                                                                                                                                                                                                                                                                                                                                                                                                                                                                                                                                                                                                                                                                                                                                                                                                                                                                                                                                                                                                                                                                                                                                                                                                                                                                                                                                                                                                                                                                                |
| VC_329_15 | GU169904                                                                                                                                                                                                                                                                                                                                                                                                                                                                                                                                                                                                                                                                                                                                                                                                                                                                                                                                                                                                                                                                                                                                                                                                                                                                                                                                                                                                                                                                                                                                                                                                                                                                                                                                                                                                                                                                                                                                                                                                                                                                                                                                                                                                                                                                                                                                                                                                                                                                                                                                                                                                                                                                                                                                                                                                                                                                                                                                                                                                                                                                                                                                                                                                                                                                                                                                                                                                                                                                                                                                                                                                                                                                                                                                                                                                                                                                                                                                                                                                                                                                                                                                                                                                                                                                                                                                                                                                                                                                                                                                                                                                                                                                                                                                                                                                                                                                                                                                                                                                                                                                                                                                                                                                                                                                                                                                                                                                                                                                                                                                                                                                                                                                                                                                                                                                                                                                                                                                                                                                                                                                                                                                                                                                                                                                                                                                                                                                                                                                                                                                                                                                                                                                                                                                                                                                                                                                                                                                                                                                                                                                                                                                                                                                                                                                                                                                                                                                                                                                                                                                                                                                                                                                                                                                                                                                                                                                                                                                                                                                                                                                                                                                                                                                                                                                                                                                                                                                                                                                                                                                                                                                                                                                                                                                                                                                                                                                                                                                                                                                                                                                                                                                                                                                                                                                                                                                                |
| VC_329_16 | KF055347,KX405003,MT409176,MW423797                                                                                                                                                                                                                                                                                                                                                                                                                                                                                                                                                                                                                                                                                                                                                                                                                                                                                                                                                                                                                                                                                                                                                                                                                                                                                                                                                                                                                                                                                                                                                                                                                                                                                                                                                                                                                                                                                                                                                                                                                                                                                                                                                                                                                                                                                                                                                                                                                                                                                                                                                                                                                                                                                                                                                                                                                                                                                                                                                                                                                                                                                                                                                                                                                                                                                                                                                                                                                                                                                                                                                                                                                                                                                                                                                                                                                                                                                                                                                                                                                                                                                                                                                                                                                                                                                                                                                                                                                                                                                                                                                                                                                                                                                                                                                                                                                                                                                                                                                                                                                                                                                                                                                                                                                                                                                                                                                                                                                                                                                                                                                                                                                                                                                                                                                                                                                                                                                                                                                                                                                                                                                                                                                                                                                                                                                                                                                                                                                                                                                                                                                                                                                                                                                                                                                                                                                                                                                                                                                                                                                                                                                                                                                                                                                                                                                                                                                                                                                                                                                                                                                                                                                                                                                                                                                                                                                                                                                                                                                                                                                                                                                                                                                                                                                                                                                                                                                                                                                                                                                                                                                                                                                                                                                                                                                                                                                                                                                                                                                                                                                                                                                                                                                                                                                                                                                                                     |
| VC_329_17 | KM092515,MT323237,OK040806,OK040807                                                                                                                                                                                                                                                                                                                                                                                                                                                                                                                                                                                                                                                                                                                                                                                                                                                                                                                                                                                                                                                                                                                                                                                                                                                                                                                                                                                                                                                                                                                                                                                                                                                                                                                                                                                                                                                                                                                                                                                                                                                                                                                                                                                                                                                                                                                                                                                                                                                                                                                                                                                                                                                                                                                                                                                                                                                                                                                                                                                                                                                                                                                                                                                                                                                                                                                                                                                                                                                                                                                                                                                                                                                                                                                                                                                                                                                                                                                                                                                                                                                                                                                                                                                                                                                                                                                                                                                                                                                                                                                                                                                                                                                                                                                                                                                                                                                                                                                                                                                                                                                                                                                                                                                                                                                                                                                                                                                                                                                                                                                                                                                                                                                                                                                                                                                                                                                                                                                                                                                                                                                                                                                                                                                                                                                                                                                                                                                                                                                                                                                                                                                                                                                                                                                                                                                                                                                                                                                                                                                                                                                                                                                                                                                                                                                                                                                                                                                                                                                                                                                                                                                                                                                                                                                                                                                                                                                                                                                                                                                                                                                                                                                                                                                                                                                                                                                                                                                                                                                                                                                                                                                                                                                                                                                                                                                                                                                                                                                                                                                                                                                                                                                                                                                                                                                                                                                     |
| VC_329_18 | JX560968,MKS24176,MN882542,MT833282,MT887289,MW296865,ON540300                                                                                                                                                                                                                                                                                                                                                                                                                                                                                                                                                                                                                                                                                                                                                                                                                                                                                                                                                                                                                                                                                                                                                                                                                                                                                                                                                                                                                                                                                                                                                                                                                                                                                                                                                                                                                                                                                                                                                                                                                                                                                                                                                                                                                                                                                                                                                                                                                                                                                                                                                                                                                                                                                                                                                                                                                                                                                                                                                                                                                                                                                                                                                                                                                                                                                                                                                                                                                                                                                                                                                                                                                                                                                                                                                                                                                                                                                                                                                                                                                                                                                                                                                                                                                                                                                                                                                                                                                                                                                                                                                                                                                                                                                                                                                                                                                                                                                                                                                                                                                                                                                                                                                                                                                                                                                                                                                                                                                                                                                                                                                                                                                                                                                                                                                                                                                                                                                                                                                                                                                                                                                                                                                                                                                                                                                                                                                                                                                                                                                                                                                                                                                                                                                                                                                                                                                                                                                                                                                                                                                                                                                                                                                                                                                                                                                                                                                                                                                                                                                                                                                                                                                                                                                                                                                                                                                                                                                                                                                                                                                                                                                                                                                                                                                                                                                                                                                                                                                                                                                                                                                                                                                                                                                                                                                                                                                                                                                                                                                                                                                                                                                                                                                                                                                                                                                          |
| VC_329_19 | ON868915                                                                                                                                                                                                                                                                                                                                                                                                                                                                                                                                                                                                                                                                                                                                                                                                                                                                                                                                                                                                                                                                                                                                                                                                                                                                                                                                                                                                                                                                                                                                                                                                                                                                                                                                                                                                                                                                                                                                                                                                                                                                                                                                                                                                                                                                                                                                                                                                                                                                                                                                                                                                                                                                                                                                                                                                                                                                                                                                                                                                                                                                                                                                                                                                                                                                                                                                                                                                                                                                                                                                                                                                                                                                                                                                                                                                                                                                                                                                                                                                                                                                                                                                                                                                                                                                                                                                                                                                                                                                                                                                                                                                                                                                                                                                                                                                                                                                                                                                                                                                                                                                                                                                                                                                                                                                                                                                                                                                                                                                                                                                                                                                                                                                                                                                                                                                                                                                                                                                                                                                                                                                                                                                                                                                                                                                                                                                                                                                                                                                                                                                                                                                                                                                                                                                                                                                                                                                                                                                                                                                                                                                                                                                                                                                                                                                                                                                                                                                                                                                                                                                                                                                                                                                                                                                                                                                                                                                                                                                                                                                                                                                                                                                                                                                                                                                                                                                                                                                                                                                                                                                                                                                                                                                                                                                                                                                                                                                                                                                                                                                                                                                                                                                                                                                                                                                                                                                                |
| VC_329_2  | MN850631,MN850637                                                                                                                                                                                                                                                                                                                                                                                                                                                                                                                                                                                                                                                                                                                                                                                                                                                                                                                                                                                                                                                                                                                                                                                                                                                                                                                                                                                                                                                                                                                                                                                                                                                                                                                                                                                                                                                                                                                                                                                                                                                                                                                                                                                                                                                                                                                                                                                                                                                                                                                                                                                                                                                                                                                                                                                                                                                                                                                                                                                                                                                                                                                                                                                                                                                                                                                                                                                                                                                                                                                                                                                                                                                                                                                                                                                                                                                                                                                                                                                                                                                                                                                                                                                                                                                                                                                                                                                                                                                                                                                                                                                                                                                                                                                                                                                                                                                                                                                                                                                                                                                                                                                                                                                                                                                                                                                                                                                                                                                                                                                                                                                                                                                                                                                                                                                                                                                                                                                                                                                                                                                                                                                                                                                                                                                                                                                                                                                                                                                                                                                                                                                                                                                                                                                                                                                                                                                                                                                                                                                                                                                                                                                                                                                                                                                                                                                                                                                                                                                                                                                                                                                                                                                                                                                                                                                                                                                                                                                                                                                                                                                                                                                                                                                                                                                                                                                                                                                                                                                                                                                                                                                                                                                                                                                                                                                                                                                                                                                                                                                                                                                                                                                                                                                                                                                                                                                                       |
| VC_329_20 | LC739530,LC739531,LC739532,ON210138                                                                                                                                                                                                                                                                                                                                                                                                                                                                                                                                                                                                                                                                                                                                                                                                                                                                                                                                                                                                                                                                                                                                                                                                                                                                                                                                                                                                                                                                                                                                                                                                                                                                                                                                                                                                                                                                                                                                                                                                                                                                                                                                                                                                                                                                                                                                                                                                                                                                                                                                                                                                                                                                                                                                                                                                                                                                                                                                                                                                                                                                                                                                                                                                                                                                                                                                                                                                                                                                                                                                                                                                                                                                                                                                                                                                                                                                                                                                                                                                                                                                                                                                                                                                                                                                                                                                                                                                                                                                                                                                                                                                                                                                                                                                                                                                                                                                                                                                                                                                                                                                                                                                                                                                                                                                                                                                                                                                                                                                                                                                                                                                                                                                                                                                                                                                                                                                                                                                                                                                                                                                                                                                                                                                                                                                                                                                                                                                                                                                                                                                                                                                                                                                                                                                                                                                                                                                                                                                                                                                                                                                                                                                                                                                                                                                                                                                                                                                                                                                                                                                                                                                                                                                                                                                                                                                                                                                                                                                                                                                                                                                                                                                                                                                                                                                                                                                                                                                                                                                                                                                                                                                                                                                                                                                                                                                                                                                                                                                                                                                                                                                                                                                                                                                                                                                                                                     |
| VC_329_21 | MH051914                                                                                                                                                                                                                                                                                                                                                                                                                                                                                                                                                                                                                                                                                                                                                                                                                                                                                                                                                                                                                                                                                                                                                                                                                                                                                                                                                                                                                                                                                                                                                                                                                                                                                                                                                                                                                                                                                                                                                                                                                                                                                                                                                                                                                                                                                                                                                                                                                                                                                                                                                                                                                                                                                                                                                                                                                                                                                                                                                                                                                                                                                                                                                                                                                                                                                                                                                                                                                                                                                                                                                                                                                                                                                                                                                                                                                                                                                                                                                                                                                                                                                                                                                                                                                                                                                                                                                                                                                                                                                                                                                                                                                                                                                                                                                                                                                                                                                                                                                                                                                                                                                                                                                                                                                                                                                                                                                                                                                                                                                                                                                                                                                                                                                                                                                                                                                                                                                                                                                                                                                                                                                                                                                                                                                                                                                                                                                                                                                                                                                                                                                                                                                                                                                                                                                                                                                                                                                                                                                                                                                                                                                                                                                                                                                                                                                                                                                                                                                                                                                                                                                                                                                                                                                                                                                                                                                                                                                                                                                                                                                                                                                                                                                                                                                                                                                                                                                                                                                                                                                                                                                                                                                                                                                                                                                                                                                                                                                                                                                                                                                                                                                                                                                                                                                                                                                                                                                |
| VC_329_22 | MZ311863,OM386661,OM386663,OM386664,OM386665                                                                                                                                                                                                                                                                                                                                                                                                                                                                                                                                                                                                                                                                                                                                                                                                                                                                                                                                                                                                                                                                                                                                                                                                                                                                                                                                                                                                                                                                                                                                                                                                                                                                                                                                                                                                                                                                                                                                                                                                                                                                                                                                                                                                                                                                                                                                                                                                                                                                                                                                                                                                                                                                                                                                                                                                                                                                                                                                                                                                                                                                                                                                                                                                                                                                                                                                                                                                                                                                                                                                                                                                                                                                                                                                                                                                                                                                                                                                                                                                                                                                                                                                                                                                                                                                                                                                                                                                                                                                                                                                                                                                                                                                                                                                                                                                                                                                                                                                                                                                                                                                                                                                                                                                                                                                                                                                                                                                                                                                                                                                                                                                                                                                                                                                                                                                                                                                                                                                                                                                                                                                                                                                                                                                                                                                                                                                                                                                                                                                                                                                                                                                                                                                                                                                                                                                                                                                                                                                                                                                                                                                                                                                                                                                                                                                                                                                                                                                                                                                                                                                                                                                                                                                                                                                                                                                                                                                                                                                                                                                                                                                                                                                                                                                                                                                                                                                                                                                                                                                                                                                                                                                                                                                                                                                                                                                                                                                                                                                                                                                                                                                                                                                                                                                                                                                                                            |
| VC_329_3  | KX3779331,L880803,MK962758,MN850564,MN850566,MN850577,MN850580,MN850585,MN850603,MN850605,MN850610,MN850611,MN850614,MN850619,MN850633,MN850635,MN850636,MN850639,MN850644,MN850647,MZ501086,OK272490,OM630585,OX016465                                                                                                                                                                                                                                                                                                                                                                                                                                                                                                                                                                                                                                                                                                                                                                                                                                                                                                                                                                                                                                                                                                                                                                                                                                                                                                                                                                                                                                                                                                                                                                                                                                                                                                                                                                                                                                                                                                                                                                                                                                                                                                                                                                                                                                                                                                                                                                                                                                                                                                                                                                                                                                                                                                                                                                                                                                                                                                                                                                                                                                                                                                                                                                                                                                                                                                                                                                                                                                                                                                                                                                                                                                                                                                                                                                                                                                                                                                                                                                                                                                                                                                                                                                                                                                                                                                                                                                                                                                                                                                                                                                                                                                                                                                                                                                                                                                                                                                                                                                                                                                                                                                                                                                                                                                                                                                                                                                                                                                                                                                                                                                                                                                                                                                                                                                                                                                                                                                                                                                                                                                                                                                                                                                                                                                                                                                                                                                                                                                                                                                                                                                                                                                                                                                                                                                                                                                                                                                                                                                                                                                                                                                                                                                                                                                                                                                                                                                                                                                                                                                                                                                                                                                                                                                                                                                                                                                                                                                                                                                                                                                                                                                                                                                                                                                                                                                                                                                                                                                                                                                                                                                                                                                                                                                                                                                                                                                                                                                                                                                                                                                                                                                                                 |
| VC_329_4  | JN225449,KR014248                                                                                                                                                                                                                                                                                                                                                                                                                                                                                                                                                                                                                                                                                                                                                                                                                                                                                                                                                                                                                                                                                                                                                                                                                                                                                                                                                                                                                                                                                                                                                                                                                                                                                                                                                                                                                                                                                                                                                                                                                                                                                                                                                                                                                                                                                                                                                                                                                                                                                                                                                                                                                                                                                                                                                                                                                                                                                                                                                                                                                                                                                                                                                                                                                                                                                                                                                                                                                                                                                                                                                                                                                                                                                                                                                                                                                                                                                                                                                                                                                                                                                                                                                                                                                                                                                                                                                                                                                                                                                                                                                                                                                                                                                                                                                                                                                                                                                                                                                                                                                                                                                                                                                                                                                                                                                                                                                                                                                                                                                                                                                                                                                                                                                                                                                                                                                                                                                                                                                                                                                                                                                                                                                                                                                                                                                                                                                                                                                                                                                                                                                                                                                                                                                                                                                                                                                                                                                                                                                                                                                                                                                                                                                                                                                                                                                                                                                                                                                                                                                                                                                                                                                                                                                                                                                                                                                                                                                                                                                                                                                                                                                                                                                                                                                                                                                                                                                                                                                                                                                                                                                                                                                                                                                                                                                                                                                                                                                                                                                                                                                                                                                                                                                                                                                                                                                                                                       |
| VC_329_5  | MN994499                                                                                                                                                                                                                                                                                                                                                                                                                                                                                                                                                                                                                                                                                                                                                                                                                                                                                                                                                                                                                                                                                                                                                                                                                                                                                                                                                                                                                                                                                                                                                                                                                                                                                                                                                                                                                                                                                                                                                                                                                                                                                                                                                                                                                                                                                                                                                                                                                                                                                                                                                                                                                                                                                                                                                                                                                                                                                                                                                                                                                                                                                                                                                                                                                                                                                                                                                                                                                                                                                                                                                                                                                                                                                                                                                                                                                                                                                                                                                                                                                                                                                                                                                                                                                                                                                                                                                                                                                                                                                                                                                                                                                                                                                                                                                                                                                                                                                                                                                                                                                                                                                                                                                                                                                                                                                                                                                                                                                                                                                                                                                                                                                                                                                                                                                                                                                                                                                                                                                                                                                                                                                                                                                                                                                                                                                                                                                                                                                                                                                                                                                                                                                                                                                                                                                                                                                                                                                                                                                                                                                                                                                                                                                                                                                                                                                                                                                                                                                                                                                                                                                                                                                                                                                                                                                                                                                                                                                                                                                                                                                                                                                                                                                                                                                                                                                                                                                                                                                                                                                                                                                                                                                                                                                                                                                                                                                                                                                                                                                                                                                                                                                                                                                                                                                                                                                                                                                |
| VC_329_6  | LR597658,MZ726791,MZ726792                                                                                                                                                                                                                                                                                                                                                                                                                                                                                                                                                                                                                                                                                                                                                                                                                                                                                                                                                                                                                                                                                                                                                                                                                                                                                                                                                                                                                                                                                                                                                                                                                                                                                                                                                                                                                                                                                                                                                                                                                                                                                                                                                                                                                                                                                                                                                                                                                                                                                                                                                                                                                                                                                                                                                                                                                                                                                                                                                                                                                                                                                                                                                                                                                                                                                                                                                                                                                                                                                                                                                                                                                                                                                                                                                                                                                                                                                                                                                                                                                                                                                                                                                                                                                                                                                                                                                                                                                                                                                                                                                                                                                                                                                                                                                                                                                                                                                                                                                                                                                                                                                                                                                                                                                                                                                                                                                                                                                                                                                                                                                                                                                                                                                                                                                                                                                                                                                                                                                                                                                                                                                                                                                                                                                                                                                                                                                                                                                                                                                                                                                                                                                                                                                                                                                                                                                                                                                                                                                                                                                                                                                                                                                                                                                                                                                                                                                                                                                                                                                                                                                                                                                                                                                                                                                                                                                                                                                                                                                                                                                                                                                                                                                                                                                                                                                                                                                                                                                                                                                                                                                                                                                                                                                                                                                                                                                                                                                                                                                                                                                                                                                                                                                                                                                                                                                                                              |
| VC_329_7  | EU877232,KP869100,KP869106,KP869109,KP869110,KP869113,KT184313,KT184314,KT184315,KT184316,LC519489,LR699048,MH571750,MK482688,MK482689,MK482690,MT446388,MW481326                                                                                                                                                                                                                                                                                                                                                                                                                                                                                                                                                                                                                                                                                                                                                                                                                                                                                                                                                                                                                                                                                                                                                                                                                                                                                                                                                                                                                                                                                                                                                                                                                                                                                                                                                                                                                                                                                                                                                                                                                                                                                                                                                                                                                                                                                                                                                                                                                                                                                                                                                                                                                                                                                                                                                                                                                                                                                                                                                                                                                                                                                                                                                                                                                                                                                                                                                                                                                                                                                                                                                                                                                                                                                                                                                                                                                                                                                                                                                                                                                                                                                                                                                                                                                                                                                                                                                                                                                                                                                                                                                                                                                                                                                                                                                                                                                                                                                                                                                                                                                                                                                                                                                                                                                                                                                                                                                                                                                                                                                                                                                                                                                                                                                                                                                                                                                                                                                                                                                                                                                                                                                                                                                                                                                                                                                                                                                                                                                                                                                                                                                                                                                                                                                                                                                                                                                                                                                                                                                                                                                                                                                                                                                                                                                                                                                                                                                                                                                                                                                                                                                                                                                                                                                                                                                                                                                                                                                                                                                                                                                                                                                                                                                                                                                                                                                                                                                                                                                                                                                                                                                                                                                                                                                                                                                                                                                                                                                                                                                                                                                                                                                                                                                                                       |
| VC_329_8  | LC473039,MN994503                                                                                                                                                                                                                                                                                                                                                                                                                                                                                                                                                                                                                                                                                                                                                                                                                                                                                                                                                                                                                                                                                                                                                                                                                                                                                                                                                                                                                                                                                                                                                                                                                                                                                                                                                                                                                                                                                                                                                                                                                                                                                                                                                                                                                                                                                                                                                                                                                                                                                                                                                                                                                                                                                                                                                                                                                                                                                                                                                                                                                                                                                                                                                                                                                                                                                                                                                                                                                                                                                                                                                                                                                                                                                                                                                                                                                                                                                                                                                                                                                                                                                                                                                                                                                                                                                                                                                                                                                                                                                                                                                                                                                                                                                                                                                                                                                                                                                                                                                                                                                                                                                                                                                                                                                                                                                                                                                                                                                                                                                                                                                                                                                                                                                                                                                                                                                                                                                                                                                                                                                                                                                                                                                                                                                                                                                                                                                                                                                                                                                                                                                                                                                                                                                                                                                                                                                                                                                                                                                                                                                                                                                                                                                                                                                                                                                                                                                                                                                                                                                                                                                                                                                                                                                                                                                                                                                                                                                                                                                                                                                                                                                                                                                                                                                                                                                                                                                                                                                                                                                                                                                                                                                                                                                                                                                                                                                                                                                                                                                                                                                                                                                                                                                                                                                                                                                                                                       |
| VC_329_9  | LR597663                                                                                                                                                                                                                                                                                                                                                                                                                                                                                                                                                                                                                                                                                                                                                                                                                                                                                                                                                                                                                                                                                                                                                                                                                                                                                                                                                                                                                                                                                                                                                                                                                                                                                                                                                                                                                                                                                                                                                                                                                                                                                                                                                                                                                                                                                                                                                                                                                                                                                                                                                                                                                                                                                                                                                                                                                                                                                                                                                                                                                                                                                                                                                                                                                                                                                                                                                                                                                                                                                                                                                                                                                                                                                                                                                                                                                                                                                                                                                                                                                                                                                                                                                                                                                                                                                                                                                                                                                                                                                                                                                                                                                                                                                                                                                                                                                                                                                                                                                                                                                                                                                                                                                                                                                                                                                                                                                                                                                                                                                                                                                                                                                                                                                                                                                                                                                                                                                                                                                                                                                                                                                                                                                                                                                                                                                                                                                                                                                                                                                                                                                                                                                                                                                                                                                                                                                                                                                                                                                                                                                                                                                                                                                                                                                                                                                                                                                                                                                                                                                                                                                                                                                                                                                                                                                                                                                                                                                                                                                                                                                                                                                                                                                                                                                                                                                                                                                                                                                                                                                                                                                                                                                                                                                                                                                                                                                                                                                                                                                                                                                                                                                                                                                                                                                                                                                                                                                |
| VC_33_0   | HQ201307,JQ182729,MH178096,MN688132                                                                                                                                                                                                                                                                                                                                                                                                                                                                                                                                                                                                                                                                                                                                                                                                                                                                                                                                                                                                                                                                                                                                                                                                                                                                                                                                                                                                                                                                                                                                                                                                                                                                                                                                                                                                                                                                                                                                                                                                                                                                                                                                                                                                                                                                                                                                                                                                                                                                                                                                                                                                                                                                                                                                                                                                                                                                                                                                                                                                                                                                                                                                                                                                                                                                                                                                                                                                                                                                                                                                                                                                                                                                                                                                                                                                                                                                                                                                                                                                                                                                                                                                                                                                                                                                                                                                                                                                                                                                                                                                                                                                                                                                                                                                                                                                                                                                                                                                                                                                                                                                                                                                                                                                                                                                                                                                                                                                                                                                                                                                                                                                                                                                                                                                                                                                                                                                                                                                                                                                                                                                                                                                                                                                                                                                                                                                                                                                                                                                                                                                                                                                                                                                                                                                                                                                                                                                                                                                                                                                                                                                                                                                                                                                                                                                                                                                                                                                                                                                                                                                                                                                                                                                                                                                                                                                                                                                                                                                                                                                                                                                                                                                                                                                                                                                                                                                                                                                                                                                                                                                                                                                                                                                                                                                                                                                                                                                                                                                                                                                                                                                                                                                                                                                                                                                                                                     |
| VC_330_0  | KM236239,KT001916,KT363872,KT454805,KT454806,KY654690,MF158040,MF158041,MF158043,MF158044,MF327003,MF327004,MF327005,MH791400,MH791413,MH920362,MK562502,MK562504,MK562505,MN342151,MN850587,OK539913,OM495343,ON528729,ON528730,ON528731,ON528732                                                                                                                                                                                                                                                                                                                                                                                                                                                                                                                                                                                                                                                                                                                                                                                                                                                                                                                                                                                                                                                                                                                                                                                                                                                                                                                                                                                                                                                                                                                                                                                                                                                                                                                                                                                                                                                                                                                                                                                                                                                                                                                                                                                                                                                                                                                                                                                                                                                                                                                                                                                                                                                                                                                                                                                                                                                                                                                                                                                                                                                                                                                                                                                                                                                                                                                                                                                                                                                                                                                                                                                                                                                                                                                                                                                                                                                                                                                                                                                                                                                                                                                                                                                                                                                                                                                                                                                                                                                                                                                                                                                                                                                                                                                                                                                                                                                                                                                                                                                                                                                                                                                                                                                                                                                                                                                                                                                                                                                                                                                                                                                                                                                                                                                                                                                                                                                                                                                                                                                                                                                                                                                                                                                                                                                                                                                                                                                                                                                                                                                                                                                                                                                                                                                                                                                                                                                                                                                                                                                                                                                                                                                                                                                                                                                                                                                                                                                                                                                                                                                                                                                                                                                                                                                                                                                                                                                                                                                                                                                                                                                                                                                                                                                                                                                                                                                                                                                                                                                                                                                                                                                                                                                                                                                                                                                                                                                                                                                                                                                                                                                                                                      |
| VC_331_0  | MK290737,MK290738,MN270891,MN270892                                                                                                                                                                                                                                                                                                                                                                                                                                                                                                                                                                                                                                                                                                                                                                                                                                                                                                                                                                                                                                                                                                                                                                                                                                                                                                                                                                                                                                                                                                                                                                                                                                                                                                                                                                                                                                                                                                                                                                                                                                                                                                                                                                                                                                                                                                                                                                                                                                                                                                                                                                                                                                                                                                                                                                                                                                                                                                                                                                                                                                                                                                                                                                                                                                                                                                                                                                                                                                                                                                                                                                                                                                                                                                                                                                                                                                                                                                                                                                                                                                                                                                                                                                                                                                                                                                                                                                                                                                                                                                                                                                                                                                                                                                                                                                                                                                                                                                                                                                                                                                                                                                                                                                                                                                                                                                                                                                                                                                                                                                                                                                                                                                                                                                                                                                                                                                                                                                                                                                                                                                                                                                                                                                                                                                                                                                                                                                                                                                                                                                                                                                                                                                                                                                                                                                                                                                                                                                                                                                                                                                                                                                                                                                                                                                                                                                                                                                                                                                                                                                                                                                                                                                                                                                                                                                                                                                                                                                                                                                                                                                                                                                                                                                                                                                                                                                                                                                                                                                                                                                                                                                                                                                                                                                                                                                                                                                                                                                                                                                                                                                                                                                                                                                                                                                                                                                                     |
| VC_332_0  | MW749004,MW749010,OK283618                                                                                                                                                                                                                                                                                                                                                                                                                                                                                                                                                                                                                                                                                                                                                                                                                                                                                                                                                                                                                                                                                                                                                                                                                                                                                                                                                                                                                                                                                                                                                                                                                                                                                                                                                                                                                                                                                                                                                                                                                                                                                                                                                                                                                                                                                                                                                                                                                                                                                                                                                                                                                                                                                                                                                                                                                                                                                                                                                                                                                                                                                                                                                                                                                                                                                                                                                                                                                                                                                                                                                                                                                                                                                                                                                                                                                                                                                                                                                                                                                                                                                                                                                                                                                                                                                                                                                                                                                                                                                                                                                                                                                                                                                                                                                                                                                                                                                                                                                                                                                                                                                                                                                                                                                                                                                                                                                                                                                                                                                                                                                                                                                                                                                                                                                                                                                                                                                                                                                                                                                                                                                                                                                                                                                                                                                                                                                                                                                                                                                                                                                                                                                                                                                                                                                                                                                                                                                                                                                                                                                                                                                                                                                                                                                                                                                                                                                                                                                                                                                                                                                                                                                                                                                                                                                                                                                                                                                                                                                                                                                                                                                                                                                                                                                                                                                                                                                                                                                                                                                                                                                                                                                                                                                                                                                                                                                                                                                                                                                                                                                                                                                                                                                                                                                                                                                                                              |
| VC_333_0  | FN391954,KT337342,KY065453,KY065454,KY065458,KY065459,KY065460,KY065461,KY065462,KY065463,KY065469,KY065470,KY065471,KY065494,KY065495,KY065499,MK448732,MK448739,MK448901,MK448912,MK448914,MK448918,MK448920,MT900487,OL774868                                                                                                                                                                                                                                                                                                                                                                                                                                                                                                                                                                                                                                                                                                                                                                                                                                                                                                                                                                                                                                                                                                                                                                                                                                                                                                                                                                                                                                                                                                                                                                                                                                                                                                                                                                                                                                                                                                                                                                                                                                                                                                                                                                                                                                                                                                                                                                                                                                                                                                                                                                                                                                                                                                                                                                                                                                                                                                                                                                                                                                                                                                                                                                                                                                                                                                                                                                                                                                                                                                                                                                                                                                                                                                                                                                                                                                                                                                                                                                                                                                                                                                                                                                                                                                                                                                                                                                                                                                                                                                                                                                                                                                                                                                                                                                                                                                                                                                                                                                                                                                                                                                                                                                                                                                                                                                                                                                                                                                                                                                                                                                                                                                                                                                                                                                                                                                                                                                                                                                                                                                                                                                                                                                                                                                                                                                                                                                                                                                                                                                                                                                                                                                                                                                                                                                                                                                                                                                                                                                                                                                                                                                                                                                                                                                                                                                                                                                                                                                                                                                                                                                                                                                                                                                                                                                                                                                                                                                                                                                                                                                                                                                                                                                                                                                                                                                                                                                                                                                                                                                                                                                                                                                                                                                                                                                                                                                                                                                                                                                                                                                                                                                                        |
| VC_334_0  | MK449000                                                                                                                                                                                                                                                                                                                                                                                                                                                                                                                                                                                                                                                                                                                                                                                                                                                                                                                                                                                                                                                                                                                                                                                                                                                                                                                                                                                                                                                                                                                                                                                                                                                                                                                                                                                                                                                                                                                                                                                                                                                                                                                                                                                                                                                                                                                                                                                                                                                                                                                                                                                                                                                                                                                                                                                                                                                                                                                                                                                                                                                                                                                                                                                                                                                                                                                                                                                                                                                                                                                                                                                                                                                                                                                                                                                                                                                                                                                                                                                                                                                                                                                                                                                                                                                                                                                                                                                                                                                                                                                                                                                                                                                                                                                                                                                                                                                                                                                                                                                                                                                                                                                                                                                                                                                                                                                                                                                                                                                                                                                                                                                                                                                                                                                                                                                                                                                                                                                                                                                                                                                                                                                                                                                                                                                                                                                                                                                                                                                                                                                                                                                                                                                                                                                                                                                                                                                                                                                                                                                                                                                                                                                                                                                                                                                                                                                                                                                                                                                                                                                                                                                                                                                                                                                                                                                                                                                                                                                                                                                                                                                                                                                                                                                                                                                                                                                                                                                                                                                                                                                                                                                                                                                                                                                                                                                                                                                                                                                                                                                                                                                                                                                                                                                                                                                                                                                                                |
| VC_335_0  | MK448804,MK448805,MK448807,MK448808,MK448815,MK448991                                                                                                                                                                                                                                                                                                                                                                                                                                                                                                                                                                                                                                                                                                                                                                                                                                                                                                                                                                                                                                                                                                                                                                                                                                                                                                                                                                                                                                                                                                                                                                                                                                                                                                                                                                                                                                                                                                                                                                                                                                                                                                                                                                                                                                                                                                                                                                                                                                                                                                                                                                                                                                                                                                                                                                                                                                                                                                                                                                                                                                                                                                                                                                                                                                                                                                                                                                                                                                                                                                                                                                                                                                                                                                                                                                                                                                                                                                                                                                                                                                                                                                                                                                                                                                                                                                                                                                                                                                                                                                                                                                                                                                                                                                                                                                                                                                                                                                                                                                                                                                                                                                                                                                                                                                                                                                                                                                                                                                                                                                                                                                                                                                                                                                                                                                                                                                                                                                                                                                                                                                                                                                                                                                                                                                                                                                                                                                                                                                                                                                                                                                                                                                                                                                                                                                                                                                                                                                                                                                                                                                                                                                                                                                                                                                                                                                                                                                                                                                                                                                                                                                                                                                                                                                                                                                                                                                                                                                                                                                                                                                                                                                                                                                                                                                                                                                                                                                                                                                                                                                                                                                                                                                                                                                                                                                                                                                                                                                                                                                                                                                                                                                                                                                                                                                                                                                   |
| VC_337_0  | MT980836,MT980837,MT980838,MT980839,MT980840,MT980841                                                                                                                                                                                                                                                                                                                                                                                                                                                                                                                                                                                                                                                                                                                                                                                                                                                                                                                                                                                                                                                                                                                                                                                                                                                                                                                                                                                                                                                                                                                                                                                                                                                                                                                                                                                                                                                                                                                                                                                                                                                                                                                                                                                                                                                                                                                                                                                                                                                                                                                                                                                                                                                                                                                                                                                                                                                                                                                                                                                                                                                                                                                                                                                                                                                                                                                                                                                                                                                                                                                                                                                                                                                                                                                                                                                                                                                                                                                                                                                                                                                                                                                                                                                                                                                                                                                                                                                                                                                                                                                                                                                                                                                                                                                                                                                                                                                                                                                                                                                                                                                                                                                                                                                                                                                                                                                                                                                                                                                                                                                                                                                                                                                                                                                                                                                                                                                                                                                                                                                                                                                                                                                                                                                                                                                                                                                                                                                                                                                                                                                                                                                                                                                                                                                                                                                                                                                                                                                                                                                                                                                                                                                                                                                                                                                                                                                                                                                                                                                                                                                                                                                                                                                                                                                                                                                                                                                                                                                                                                                                                                                                                                                                                                                                                                                                                                                                                                                                                                                                                                                                                                                                                                                                                                                                                                                                                                                                                                                                                                                                                                                                                                                                                                                                                                                                                                   |
| VC_339_0  | AF323671,L,T985572,L,T985581,L,T985584,L,T985586,L,T985587,L,T985593,L,T993227,L,T996080                                                                                                                                                                                                                                                                                                                                                                                                                                                                                                                                                                                                                                                                                                                                                                                                                                                                                                                                                                                                                                                                                                                                                                                                                                                                                                                                                                                                                                                                                                                                                                                                                                                                                                                                                                                                                                                                                                                                                                                                                                                                                                                                                                                                                                                                                                                                                                                                                                                                                                                                                                                                                                                                                                                                                                                                                                                                                                                                                                                                                                                                                                                                                                                                                                                                                                                                                                                                                                                                                                                                                                                                                                                                                                                                                                                                                                                                                                                                                                                                                                                                                                                                                                                                                                                                                                                                                                                                                                                                                                                                                                                                                                                                                                                                                                                                                                                                                                                                                                                                                                                                                                                                                                                                                                                                                                                                                                                                                                                                                                                                                                                                                                                                                                                                                                                                                                                                                                                                                                                                                                                                                                                                                                                                                                                                                                                                                                                                                                                                                                                                                                                                                                                                                                                                                                                                                                                                                                                                                                                                                                                                                                                                                                                                                                                                                                                                                                                                                                                                                                                                                                                                                                                                                                                                                                                                                                                                                                                                                                                                                                                                                                                                                                                                                                                                                                                                                                                                                                                                                                                                                                                                                                                                                                                                                                                                                                                                                                                                                                                                                                                                                                                                                                                                                                                                |
| VC_34_0   | AY374448,CP038007,CP072507,KY271402                                                                                                                                                                                                                                                                                                                                                                                                                                                                                                                                                                                                                                                                                                                                                                                                                                                                                                                                                                                                                                                                                                                                                                                                                                                                                                                                                                                                                                                                                                                                                                                                                                                                                                                                                                                                                                                                                                                                                                                                                                                                                                                                                                                                                                                                                                                                                                                                                                                                                                                                                                                                                                                                                                                                                                                                                                                                                                                                                                                                                                                                                                                                                                                                                                                                                                                                                                                                                                                                                                                                                                                                                                                                                                                                                                                                                                                                                                                                                                                                                                                                                                                                                                                                                                                                                                                                                                                                                                                                                                                                                                                                                                                                                                                                                                                                                                                                                                                                                                                                                                                                                                                                                                                                                                                                                                                                                                                                                                                                                                                                                                                                                                                                                                                                                                                                                                                                                                                                                                                                                                                                                                                                                                                                                                                                                                                                                                                                                                                                                                                                                                                                                                                                                                                                                                                                                                                                                                                                                                                                                                                                                                                                                                                                                                                                                                                                                                                                                                                                                                                                                                                                                                                                                                                                                                                                                                                                                                                                                                                                                                                                                                                                                                                                                                                                                                                                                                                                                                                                                                                                                                                                                                                                                                                                                                                                                                                                                                                                                                                                                                                                                                                                                                                                                                                                                                                     |
| VC_340_0  | AF338467,AP013538,AP013539,AY939843,EF372997,GU071093,GU071100,GU071102,GU071104,GU071107,GU943054,HM559717,HQ316584,HQ317388,HQ317389,HQ332137,HQ332140,HQ337022,HQ633062,HQ634152,HQ634188,KC310802,KC310803,KC310804,KC310805,KC310806,MH540083,MK01666                                                                                                                                                                                                                                                                                                                                                                                                                                                                                                                                                                                                                                                                                                                                                                                                                                                                                                                                                                                                                                                                                                                                                                                                                                                                                                                                                                                                                                                                                                                                                                                                                                                                                                                                                                                                                                                                                                                                                                                                                                                                                                                                                                                                                                                                                                                                                                                                                                                                                                                                                                                                                                                                                                                                                                                                                                                                                                                                                                                                                                                                                                                                                                                                                                                                                                                                                                                                                                                                                                                                                                                                                                                                                                                                                                                                                                                                                                                                                                                                                                                                                                                                                                                                                                                                                                                                                                                                                                                                                                                                                                                                                                                                                                                                                                                                                                                                                                                                                                                                                                                                                                                                                                                                                                                                                                                                                                                                                                                                                                                                                                                                                                                                                                                                                                                                                                                                                                                                                                                                                                                                                                                                                                                                                                                                                                                                                                                                                                                                                                                                                                                                                                                                                                                                                                                                                                                                                                                                                                                                                                                                                                                                                                                                                                                                                                                                                                                                                                                                                                                                                                                                                                                                                                                                                                                                                                                                                                                                                                                                                                                                                                                                                                                                                                                                                                                                                                                                                                                                                                                                                                                                                                                                                                                                                                                                                                                                                                                                                                                                                                                                                              |
| VC_341_0  | 2,MT424636,MW015080,MZ803112                                                                                                                                                                                                                                                                                                                                                                                                                                                                                                                                                                                                                                                                                                                                                                                                                                                                                                                                                                                                                                                                                                                                                                                                                                                                                                                                                                                                                                                                                                                                                                                                                                                                                                                                                                                                                                                                                                                                                                                                                                                                                                                                                                                                                                                                                                                                                                                                                                                                                                                                                                                                                                                                                                                                                                                                                                                                                                                                                                                                                                                                                                                                                                                                                                                                                                                                                                                                                                                                                                                                                                                                                                                                                                                                                                                                                                                                                                                                                                                                                                                                                                                                                                                                                                                                                                                                                                                                                                                                                                                                                                                                                                                                                                                                                                                                                                                                                                                                                                                                                                                                                                                                                                                                                                                                                                                                                                                                                                                                                                                                                                                                                                                                                                                                                                                                                                                                                                                                                                                                                                                                                                                                                                                                                                                                                                                                                                                                                                                                                                                                                                                                                                                                                                                                                                                                                                                                                                                                                                                                                                                                                                                                                                                                                                                                                                                                                                                                                                                                                                                                                                                                                                                                                                                                                                                                                                                                                                                                                                                                                                                                                                                                                                                                                                                                                                                                                                                                                                                                                                                                                                                                                                                                                                                                                                                                                                                                                                                                                                                                                                                                                                                                                                                                                                                                                                                            |
| VC_342_0  | AF396866,MW202489,OK085710                                                                                                                                                                                                                                                                                                                                                                                                                                                                                                                                                                                                                                                                                                                                                                                                                                                                                                                                                                                                                                                                                                                                                                                                                                                                                                                                                                                                                                                                                                                                                                                                                                                                                                                                                                                                                                                                                                                                                                                                                                                                                                                                                                                                                                                                                                                                                                                                                                                                                                                                                                                                                                                                                                                                                                                                                                                                                                                                                                                                                                                                                                                                                                                                                                                                                                                                                                                                                                                                                                                                                                                                                                                                                                                                                                                                                                                                                                                                                                                                                                                                                                                                                                                                                                                                                                                                                                                                                                                                                                                                                                                                                                                                                                                                                                                                                                                                                                                                                                                                                                                                                                                                                                                                                                                                                                                                                                                                                                                                                                                                                                                                                                                                                                                                                                                                                                                                                                                                                                                                                                                                                                                                                                                                                                                                                                                                                                                                                                                                                                                                                                                                                                                                                                                                                                                                                                                                                                                                                                                                                                                                                                                                                                                                                                                                                                                                                                                                                                                                                                                                                                                                                                                                                                                                                                                                                                                                                                                                                                                                                                                                                                                                                                                                                                                                                                                                                                                                                                                                                                                                                                                                                                                                                                                                                                                                                                                                                                                                                                                                                                                                                                                                                                                                                                                                                                                              |
| VC_344_0  | MN988526,MN988556                                                                                                                                                                                                                                                                                                                                                                                                                                                                                                                                                                                                                                                                                                                                                                                                                                                                                                                                                                                                                                                                                                                                                                                                                                                                                                                                                                                                                                                                                                                                                                                                                                                                                                                                                                                                                                                                                                                                                                                                                                                                                                                                                                                                                                                                                                                                                                                                                                                                                                                                                                                                                                                                                                                                                                                                                                                                                                                                                                                                                                                                                                                                                                                                                                                                                                                                                                                                                                                                                                                                                                                                                                                                                                                                                                                                                                                                                                                                                                                                                                                                                                                                                                                                                                                                                                                                                                                                                                                                                                                                                                                                                                                                                                                                                                                                                                                                                                                                                                                                                                                                                                                                                                                                                                                                                                                                                                                                                                                                                                                                                                                                                                                                                                                                                                                                                                                                                                                                                                                                                                                                                                                                                                                                                                                                                                                                                                                                                                                                                                                                                                                                                                                                                                                                                                                                                                                                                                                                                                                                                                                                                                                                                                                                                                                                                                                                                                                                                                                                                                                                                                                                                                                                                                                                                                                                                                                                                                                                                                                                                                                                                                                                                                                                                                                                                                                                                                                                                                                                                                                                                                                                                                                                                                                                                                                                                                                                                                                                                                                                                                                                                                                                                                                                                                                                                                                                       |
| VC_344_1  | AF399011,AP019418,JX233784,KU521356,LC727695,LC727696,LC727699,LC727701,MF805716,MN563784,MN871480,MN871489,MT133560,MT995926,MT995927,MT995928,MW057919,MZ444140,ON631220,OP310983,OP310984                                                                                                                                                                                                                                                                                                                                                                                                                                                                                                                                                                                                                                                                                                                                                                                                                                                                                                                                                                                                                                                                                                                                                                                                                                                                                                                                                                                                                                                                                                                                                                                                                                                                                                                                                                                                                                                                                                                                                                                                                                                                                                                                                                                                                                                                                                                                                                                                                                                                                                                                                                                                                                                                                                                                                                                                                                                                                                                                                                                                                                                                                                                                                                                                                                                                                                                                                                                                                                                                                                                                                                                                                                                                                                                                                                                                                                                                                                                                                                                                                                                                                                                                                                                                                                                                                                                                                                                                                                                                                                                                                                                                                                                                                                                                                                                                                                                                                                                                                                                                                                                                                                                                                                                                                                                                                                                                                                                                                                                                                                                                                                                                                                                                                                                                                                                                                                                                                                                                                                                                                                                                                                                                                                                                                                                                                                                                                                                                                                                                                                                                                                                                                                                                                                                                                                                                                                                                                                                                                                                                                                                                                                                                                                                                                                                                                                                                                                                                                                                                                                                                                                                                                                                                                                                                                                                                                                                                                                                                                                                                                                                                                                                                                                                                                                                                                                                                                                                                                                                                                                                                                                                                                                                                                                                                                                                                                                                                                                                                                                                                                                                                                                                                                            |
| VC_344_2  | MK599315,MN103543,OU343167                                                                                                                                                                                                                                                                                                                                                                                                                                                                                                                                                                                                                                                                                                                                                                                                                                                                                                                                                                                                                                                                                                                                                                                                                                                                                                                                                                                                                                                                                                                                                                                                                                                                                                                                                                                                                                                                                                                                                                                                                                                                                                                                                                                                                                                                                                                                                                                                                                                                                                                                                                                                                                                                                                                                                                                                                                                                                                                                                                                                                                                                                                                                                                                                                                                                                                                                                                                                                                                                                                                                                                                                                                                                                                                                                                                                                                                                                                                                                                                                                                                                                                                                                                                                                                                                                                                                                                                                                                                                                                                                                                                                                                                                                                                                                                                                                                                                                                                                                                                                                                                                                                                                                                                                                                                                                                                                                                                                                                                                                                                                                                                                                                                                                                                                                                                                                                                                                                                                                                                                                                                                                                                                                                                                                                                                                                                                                                                                                                                                                                                                                                                                                                                                                                                                                                                                                                                                                                                                                                                                                                                                                                                                                                                                                                                                                                                                                                                                                                                                                                                                                                                                                                                                                                                                                                                                                                                                                                                                                                                                                                                                                                                                                                                                                                                                                                                                                                                                                                                                                                                                                                                                                                                                                                                                                                                                                                                                                                                                                                                                                                                                                                                                                                                                                                                                                                                              |
| VC_344_3  | MP063068                                                                                                                                                                                                                                                                                                                                                                                                                                                                                                                                                                                                                                                                                                                                                                                                                                                                                                                                                                                                                                                                                                                                                                                                                                                                                                                                                                                                                                                                                                                                                                                                                                                                                                                                                                                                                                                                                                                                                                                                                                                                                                                                                                                                                                                                                                                                                                                                                                                                                                                                                                                                                                                                                                                                                                                                                                                                                                                                                                                                                                                                                                                                                                                                                                                                                                                                                                                                                                                                                                                                                                                                                                                                                                                                                                                                                                                                                                                                                                                                                                                                                                                                                                                                                                                                                                                                                                                                                                                                                                                                                                                                                                                                                                                                                                                                                                                                                                                                                                                                                                                                                                                                                                                                                                                                                                                                                                                                                                                                                                                                                                                                                                                                                                                                                                                                                                                                                                                                                                                                                                                                                                                                                                                                                                                                                                                                                                                                                                                                                                                                                                                                                                                                                                                                                                                                                                                                                                                                                                                                                                                                                                                                                                                                                                                                                                                                                                                                                                                                                                                                                                                                                                                                                                                                                                                                                                                                                                                                                                                                                                                                                                                                                                                                                                                                                                                                                                                                                                                                                                                                                                                                                                                                                                                                                                                                                                                                                                                                                                                                                                                                                                                                                                                                                                                                                                                                                |
| VC_344_4  | MK552327                                                                                                                                                                                                                                                                                                                                                                                                                                                                                                                                                                                                                                                                                                                                                                                                                                                                                                                                                                                                                                                                                                                                                                                                                                                                                                                                                                                                                                                                                                                                                                                                                                                                                                                                                                                                                                                                                                                                                                                                                                                                                                                                                                                                                                                                                                                                                                                                                                                                                                                                                                                                                                                                                                                                                                                                                                                                                                                                                                                                                                                                                                                                                                                                                                                                                                                                                                                                                                                                                                                                                                                                                                                                                                                                                                                                                                                                                                                                                                                                                                                                                                                                                                                                                                                                                                                                                                                                                                                                                                                                                                                                                                                                                                                                                                                                                                                                                                                                                                                                                                                                                                                                                                                                                                                                                                                                                                                                                                                                                                                                                                                                                                                                                                                                                                                                                                                                                                                                                                                                                                                                                                                                                                                                                                                                                                                                                                                                                                                                                                                                                                                                                                                                                                                                                                                                                                                                                                                                                                                                                                                                                                                                                                                                                                                                                                                                                                                                                                                                                                                                                                                                                                                                                                                                                                                                                                                                                                                                                                                                                                                                                                                                                                                                                                                                                                                                                                                                                                                                                                                                                                                                                                                                                                                                                                                                                                                                                                                                                                                                                                                                                                                                                                                                                                                                                                                                                |
| VC_344_5  | EU197055                                                                                                                                                                                                                                                                                                                                                                                                                                                                                                                                                                                                                                                                                                                                                                                                                                                                                                                                                                                                                                                                                                                                                                                                                                                                                                                                                                                                                                                                                                                                                                                                                                                                                                                                                                                                                                                                                                                                                                                                                                                                                                                                                                                                                                                                                                                                                                                                                                                                                                                                                                                                                                                                                                                                                                                                                                                                                                                                                                                                                                                                                                                                                                                                                                                                                                                                                                                                                                                                                                                                                                                                                                                                                                                                                                                                                                                                                                                                                                                                                                                                                                                                                                                                                                                                                                                                                                                                                                                                                                                                                                                                                                                                                                                                                                                                                                                                                                                                                                                                                                                                                                                                                                                                                                                                                                                                                                                                                                                                                                                                                                                                                                                                                                                                                                                                                                                                                                                                                                                                                                                                                                                                                                                                                                                                                                                                                                                                                                                                                                                                                                                                                                                                                                                                                                                                                                                                                                                                                                                                                                                                                                                                                                                                                                                                                                                                                                                                                                                                                                                                                                                                                                                                                                                                                                                                                                                                                                                                                                                                                                                                                                                                                                                                                                                                                                                                                                                                                                                                                                                                                                                                                                                                                                                                                                                                                                                                                                                                                                                                                                                                                                                                                                                                                                                                                                                                                |
| VC_344_6  | MF042360                                                                                                                                                                                                                                                                                                                                                                                                                                                                                                                                                                                                                                                                                                                                                                                                                                                                                                                                                                                                                                                                                                                                                                                                                                                                                                                                                                                                                                                                                                                                                                                                                                                                                                                                                                                                                                                                                                                                                                                                                                                                                                                                                                                                                                                                                                                                                                                                                                                                                                                                                                                                                                                                                                                                                                                                                                                                                                                                                                                                                                                                                                                                                                                                                                                                                                                                                                                                                                                                                                                                                                                                                                                                                                                                                                                                                                                                                                                                                                                                                                                                                                                                                                                                                                                                                                                                                                                                                                                                                                                                                                                                                                                                                                                                                                                                                                                                                                                                                                                                                                                                                                                                                                                                                                                                                                                                                                                                                                                                                                                                                                                                                                                                                                                                                                                                                                                                                                                                                                                                                                                                                                                                                                                                                                                                                                                                                                                                                                                                                                                                                                                                                                                                                                                                                                                                                                                                                                                                                                                                                                                                                                                                                                                                                                                                                                                                                                                                                                                                                                                                                                                                                                                                                                                                                                                                                                                                                                                                                                                                                                                                                                                                                                                                                                                                                                                                                                                                                                                                                                                                                                                                                                                                                                                                                                                                                                                                                                                                                                                                                                                                                                                                                                                                                                                                                                                                                |
| VC_345_0  | HQ630627                                                                                                                                                                                                                                                                                                                                                                                                                                                                                                                                                                                                                                                                                                                                                                                                                                                                                                                                                                                                                                                                                                                                                                                                                                                                                                                                                                                                                                                                                                                                                                                                                                                                                                                                                                                                                                                                                                                                                                                                                                                                                                                                                                                                                                                                                                                                                                                                                                                                                                                                                                                                                                                                                                                                                                                                                                                                                                                                                                                                                                                                                                                                                                                                                                                                                                                                                                                                                                                                                                                                                                                                                                                                                                                                                                                                                                                                                                                                                                                                                                                                                                                                                                                                                                                                                                                                                                                                                                                                                                                                                                                                                                                                                                                                                                                                                                                                                                                                                                                                                                                                                                                                                                                                                                                                                                                                                                                                                                                                                                                                                                                                                                                                                                                                                                                                                                                                                                                                                                                                                                                                                                                                                                                                                                                                                                                                                                                                                                                                                                                                                                                                                                                                                                                                                                                                                                                                                                                                                                                                                                                                                                                                                                                                                                                                                                                                                                                                                                                                                                                                                                                                                                                                                                                                                                                                                                                                                                                                                                                                                                                                                                                                                                                                                                                                                                                                                                                                                                                                                                                                                                                                                                                                                                                                                                                                                                                                                                                                                                                                                                                                                                                                                                                                                                                                                                                                                |
| VC_346_0  | AP017924,AP017925                                                                                                                                                                                                                                                                                                                                                                                                                                                                                                                                                                                                                                                                                                                                                                                                                                                                                                                                                                                                                                                                                                                                                                                                                                                                                                                                                                                                                                                                                                                                                                                                                                                                                                                                                                                                                                                                                                                                                                                                                                                                                                                                                                                                                                                                                                                                                                                                                                                                                                                                                                                                                                                                                                                                                                                                                                                                                                                                                                                                                                                                                                                                                                                                                                                                                                                                                                                                                                                                                                                                                                                                                                                                                                                                                                                                                                                                                                                                                                                                                                                                                                                                                                                                                                                                                                                                                                                                                                                                                                                                                                                                                                                                                                                                                                                                                                                                                                                                                                                                                                                                                                                                                                                                                                                                                                                                                                                                                                                                                                                                                                                                                                                                                                                                                                                                                                                                                                                                                                                                                                                                                                                                                                                                                                                                                                                                                                                                                                                                                                                                                                                                                                                                                                                                                                                                                                                                                                                                                                                                                                                                                                                                                                                                                                                                                                                                                                                                                                                                                                                                                                                                                                                                                                                                                                                                                                                                                                                                                                                                                                                                                                                                                                                                                                                                                                                                                                                                                                                                                                                                                                                                                                                                                                                                                                                                                                                                                                                                                                                                                                                                                                                                                                                                                                                                                                                                       |
| VC_346_1  | MK308674,MK308675,MK308676,MK308677                                                                                                                                                                                                                                                                                                                                                                                                                                                                                                                                                                                                                                                                                                                                                                                                                                                                                                                                                                                                                                                                                                                                                                                                                                                                                                                                                                                                                                                                                                                                                                                                                                                                                                                                                                                                                                                                                                                                                                                                                                                                                                                                                                                                                                                                                                                                                                                                                                                                                                                                                                                                                                                                                                                                                                                                                                                                                                                                                                                                                                                                                                                                                                                                                                                                                                                                                                                                                                                                                                                                                                                                                                                                                                                                                                                                                                                                                                                                                                                                                                                                                                                                                                                                                                                                                                                                                                                                                                                                                                                                                                                                                                                                                                                                                                                                                                                                                                                                                                                                                                                                                                                                                                                                                                                                                                                                                                                                                                                                                                                                                                                                                                                                                                                                                                                                                                                                                                                                                                                                                                                                                                                                                                                                                                                                                                                                                                                                                                                                                                                                                                                                                                                                                                                                                                                                                                                                                                                                                                                                                                                                                                                                                                                                                                                                                                                                                                                                                                                                                                                                                                                                                                                                                                                                                                                                                                                                                                                                                                                                                                                                                                                                                                                                                                                                                                                                                                                                                                                                                                                                                                                                                                                                                                                                                                                                                                                                                                                                                                                                                                                                                                                                                                                                                                                                                                                     |
| VC_346_2  | MT811961,OM319461                                                                                                                                                                                                                                                                                                                                                                                                                                                                                                                                                                                                                                                                                                                                                                                                                                                                                                                                                                                                                                                                                                                                                                                                                                                                                                                                                                                                                                                                                                                                                                                                                                                                                                                                                                                                                                                                                                                                                                                                                                                                                                                                                                                                                                                                                                                                                                                                                                                                                                                                                                                                                                                                                                                                                                                                                                                                                                                                                                                                                                                                                                                                                                                                                                                                                                                                                                                                                                                                                                                                                                                                                                                                                                                                                                                                                                                                                                                                                                                                                                                                                                                                                                                                                                                                                                                                                                                                                                                                                                                                                                                                                                                                                                                                                                                                                                                                                                                                                                                                                                                                                                                                                                                                                                                                                                                                                                                                                                                                                                                                                                                                                                                                                                                                                                                                                                                                                                                                                                                                                                                                                                                                                                                                                                                                                                                                                                                                                                                                                                                                                                                                                                                                                                                                                                                                                                                                                                                                                                                                                                                                                                                                                                                                                                                                                                                                                                                                                                                                                                                                                                                                                                                                                                                                                                                                                                                                                                                                                                                                                                                                                                                                                                                                                                                                                                                                                                                                                                                                                                                                                                                                                                                                                                                                                                                                                                                                                                                                                                                                                                                                                                                                                                                                                                                                                                                                       |
| VC_346_3  | OV032902                                                                                                                                                                                                                                                                                                                                                                                                                                                                                                                                                                                                                                                                                                                                                                                                                                                                                                                                                                                                                                                                                                                                                                                                                                                                                                                                                                                                                                                                                                                                                                                                                                                                                                                                                                                                                                                                                                                                                                                                                                                                                                                                                                                                                                                                                                                                                                                                                                                                                                                                                                                                                                                                                                                                                                                                                                                                                                                                                                                                                                                                                                                                                                                                                                                                                                                                                                                                                                                                                                                                                                                                                                                                                                                                                                                                                                                                                                                                                                                                                                                                                                                                                                                                                                                                                                                                                                                                                                                                                                                                                                                                                                                                                                                                                                                                                                                                                                                                                                                                                                                                                                                                                                                                                                                                                                                                                                                                                                                                                                                                                                                                                                                                                                                                                                                                                                                                                                                                                                                                                                                                                                                                                                                                                                                                                                                                                                                                                                                                                                                                                                                                                                                                                                                                                                                                                                                                                                                                                                                                                                                                                                                                                                                                                                                                                                                                                                                                                                                                                                                                                                                                                                                                                                                                                                                                                                                                                                                                                                                                                                                                                                                                                                                                                                                                                                                                                                                                                                                                                                                                                                                                                                                                                                                                                                                                                                                                                                                                                                                                                                                                                                                                                                                                                                                                                                                                                |
| VC_347_0  | MH595538                                                                                                                                                                                                                                                                                                                                                                                                                                                                                                                                                                                                                                                                                                                                                                                                                                                                                                                                                                                                                                                                                                                                                                                                                                                                                                                                                                                                                                                                                                                                                                                                                                                                                                                                                                                                                                                                                                                                                                                                                                                                                                                                                                                                                                                                                                                                                                                                                                                                                                                                                                                                                                                                                                                                                                                                                                                                                                                                                                                                                                                                                                                                                                                                                                                                                                                                                                                                                                                                                                                                                                                                                                                                                                                                                                                                                                                                                                                                                                                                                                                                                                                                                                                                                                                                                                                                                                                                                                                                                                                                                                                                                                                                                                                                                                                                                                                                                                                                                                                                                                                                                                                                                                                                                                                                                                                                                                                                                                                                                                                                                                                                                                                                                                                                                                                                                                                                                                                                                                                                                                                                                                                                                                                                                                                                                                                                                                                                                                                                                                                                                                                                                                                                                                                                                                                                                                                                                                                                                                                                                                                                                                                                                                                                                                                                                                                                                                                                                                                                                                                                                                                                                                                                                                                                                                                                                                                                                                                                                                                                                                                                                                                                                                                                                                                                                                                                                                                                                                                                                                                                                                                                                                                                                                                                                                                                                                                                                                                                                                                                                                                                                                                                                                                                                                                                                                                                                |
| VC_348_0  | LR881104,MN871444,MN871445                                                                                                                                                                                                                                                                                                                                                                                                                                                                                                                                                                                                                                                                                                                                                                                                                                                                                                                                                                                                                                                                                                                                                                                                                                                                                                                                                                                                                                                                                                                                                                                                                                                                                                                                                                                                                                                                                                                                                                                                                                                                                                                                                                                                                                                                                                                                                                                                                                                                                                                                                                                                                                                                                                                                                                                                                                                                                                                                                                                                                                                                                                                                                                                                                                                                                                                                                                                                                                                                                                                                                                                                                                                                                                                                                                                                                                                                                                                                                                                                                                                                                                                                                                                                                                                                                                                                                                                                                                                                                                                                                                                                                                                                                                                                                                                                                                                                                                                                                                                                                                                                                                                                                                                                                                                                                                                                                                                                                                                                                                                                                                                                                                                                                                                                                                                                                                                                                                                                                                                                                                                                                                                                                                                                                                                                                                                                                                                                                                                                                                                                                                                                                                                                                                                                                                                                                                                                                                                                                                                                                                                                                                                                                                                                                                                                                                                                                                                                                                                                                                                                                                                                                                                                                                                                                                                                                                                                                                                                                                                                                                                                                                                                                                                                                                                                                                                                                                                                                                                                                                                                                                                                                                                                                                                                                                                                                                                                                                                                                                                                                                                                                                                                                                                                                                                                                                                              |
| VC_349_0  | AJ344259,AJ414696,AJ748296,AJ875026,FM164764,KP282675,KX721243,KY744228,KY744229,KY744230,KY744231,KY744232,KY744233,KY744234,KY744235,MK064565,MN876841,MN876842,MN876843,OM401712,OM401713,OM401714                                                                                                                                                                                                                                                                                                                                                                                                                                                                                                                                                                                                                                                                                                                                                                                                                                                                                                                                                                                                                                                                                                                                                                                                                                                                                                                                                                                                                                                                                                                                                                                                                                                                                                                                                                                                                                                                                                                                                                                                                                                                                                                                                                                                                                                                                                                                                                                                                                                                                                                                                                                                                                                                                                                                                                                                                                                                                                                                                                                                                                                                                                                                                                                                                                                                                                                                                                                                                                                                                                                                                                                                                                                                                                                                                                                                                                                                                                                                                                                                                                                                                                                                                                                                                                                                                                                                                                                                                                                                                                                                                                                                                                                                                                                                                                                                                                                                                                                                                                                                                                                                                                                                                                                                                                                                                                                                                                                                                                                                                                                                                                                                                                                                                                                                                                                                                                                                                                                                                                                                                                                                                                                                                                                                                                                                                                                                                                                                                                                                                                                                                                                                                                                                                                                                                                                                                                                                                                                                                                                                                                                                                                                                                                                                                                                                                                                                                                                                                                                                                                                                                                                                                                                                                                                                                                                                                                                                                                                                                                                                                                                                                                                                                                                                                                                                                                                                                                                                                                                                                                                                                                                                                                                                                                                                                                                                                                                                                                                                                                                                                                                                                                                                                   |
| VC_35_0   | AF440571,AM087120,AM087121,AM087122,AM087123,EU545650,KX467643                                                                                                                                                                                                                                                                                                                                                                                                                                                                                                                                                                                                                                                                                                                                                                                                                                                                                                                                                                                                                                                                                                                                                                                                                                                                                                                                                                                                                                                                                                                                                                                                                                                                                                                                                                                                                                                                                                                                                                                                                                                                                                                                                                                                                                                                                                                                                                                                                                                                                                                                                                                                                                                                                                                                                                                                                                                                                                                                                                                                                                                                                                                                                                                                                                                                                                                                                                                                                                                                                                                                                                                                                                                                                                                                                                                                                                                                                                                                                                                                                                                                                                                                                                                                                                                                                                                                                                                                                                                                                                                                                                                                                                                                                                                                                                                                                                                                                                                                                                                                                                                                                                                                                                                                                                                                                                                                                                                                                                                                                                                                                                                                                                                                                                                                                                                                                                                                                                                                                                                                                                                                                                                                                                                                                                                                                                                                                                                                                                                                                                                                                                                                                                                                                                                                                                                                                                                                                                                                                                                                                                                                                                                                                                                                                                                                                                                                                                                                                                                                                                                                                                                                                                                                                                                                                                                                                                                                                                                                                                                                                                                                                                                                                                                                                                                                                                                                                                                                                                                                                                                                                                                                                                                                                                                                                                                                                                                                                                                                                                                                                                                                                                                                                                                                                                                                                          |
| VC_35_1   | KY271399,MK416008,MK416013,MK416022,MK448234,MK448237                                                                                                                                                                                                                                                                                                                                                                                                                                                                                                                                                                                                                                                                                                                                                                                                                                                                                                                                                                                                                                                                                                                                                                                                                                                                                                                                                                                                                                                                                                                                                                                                                                                                                                                                                                                                                                                                                                                                                                                                                                                                                                                                                                                                                                                                                                                                                                                                                                                                                                                                                                                                                                                                                                                                                                                                                                                                                                                                                                                                                                                                                                                                                                                                                                                                                                                                                                                                                                                                                                                                                                                                                                                                                                                                                                                                                                                                                                                                                                                                                                                                                                                                                                                                                                                                                                                                                                                                                                                                                                                                                                                                                                                                                                                                                                                                                                                                                                                                                                                                                                                                                                                                                                                                                                                                                                                                                                                                                                                                                                                                                                                                                                                                                                                                                                                                                                                                                                                                                                                                                                                                                                                                                                                                                                                                                                                                                                                                                                                                                                                                                                                                                                                                                                                                                                                                                                                                                                                                                                                                                                                                                                                                                                                                                                                                                                                                                                                                                                                                                                                                                                                                                                                                                                                                                                                                                                                                                                                                                                                                                                                                                                                                                                                                                                                                                                                                                                                                                                                                                                                                                                                                                                                                                                                                                                                                                                                                                                                                                                                                                                                                                                                                                                                                                                                                                                   |
| VC_350_0  | OL617042                                                                                                                                                                                                                                                                                                                                                                                                                                                                                                                                                                                                                                                                                                                                                                                                                                                                                                                                                                                                                                                                                                                                                                                                                                                                                                                                                                                                                                                                                                                                                                                                                                                                                                                                                                                                                                                                                                                                                                                                                                                                                                                                                                                                                                                                                                                                                                                                                                                                                                                                                                                                                                                                                                                                                                                                                                                                                                                                                                                                                                                                                                                                                                                                                                                                                                                                                                                                                                                                                                                                                                                                                                                                                                                                                                                                                                                                                                                                                                                                                                                                                                                                                                                                                                                                                                                                                                                                                                                                                                                                                                                                                                                                                                                                                                                                                                                                                                                                                                                                                                                                                                                                                                                                                                                                                                                                                                                                                                                                                                                                                                                                                                                                                                                                                                                                                                                                                                                                                                                                                                                                                                                                                                                                                                                                                                                                                                                                                                                                                                                                                                                                                                                                                                                                                                                                                                                                                                                                                                                                                                                                                                                                                                                                                                                                                                                                                                                                                                                                                                                                                                                                                                                                                                                                                                                                                                                                                                                                                                                                                                                                                                                                                                                                                                                                                                                                                                                                                                                                                                                                                                                                                                                                                                                                                                                                                                                                                                                                                                                                                                                                                                                                                                                                                                                                                                                                                |
| VC_351_0  | AJ854042,MK064564                                                                                                                                                                                                                                                                                                                                                                                                                                                                                                                                                                                                                                                                                                                                                                                                                                                                                                                                                                                                                                                                                                                                                                                                                                                                                                                                                                                                                                                                                                                                                                                                                                                                                                                                                                                                                                                                                                                                                                                                                                                                                                                                                                                                                                                                                                                                                                                                                                                                                                                                                                                                                                                                                                                                                                                                                                                                                                                                                                                                                                                                                                                                                                                                                                                                                                                                                                                                                                                                                                                                                                                                                                                                                                                                                                                                                                                                                                                                                                                                                                                                                                                                                                                                                                                                                                                                                                                                                                                                                                                                                                                                                                                                                                                                                                                                                                                                                                                                                                                                                                                                                                                                                                                                                                                                                                                                                                                                                                                                                                                                                                                                                                                                                                                                                                                                                                                                                                                                                                                                                                                                                                                                                                                                                                                                                                                                                                                                                                                                                                                                                                                                                                                                                                                                                                                                                                                                                                                                                                                                                                                                                                                                                                                                                                                                                                                                                                                                                                                                                                                                                                                                                                                                                                                                                                                                                                                                                                                                                                                                                                                                                                                                                                                                                                                                                                                                                                                                                                                                                                                                                                                                                                                                                                                                                                                                                                                                                                                                                                                                                                                                                                                                                                                                                                                                                                                                       |
| VC_352_0  | AM419438,HQ332141,MW344765                                                                                                                                                                                                                                                                                                                                                                                                                                                                                                                                                                                                                                                                                                                                                                                                                                                                                                                                                                                                                                                                                                                                                                                                                                                                                                                                                                                                                                                                                                                                                                                                                                                                                                                                                                                                                                                                                                                                                                                                                                                                                                                                                                                                                                                                                                                                                                                                                                                                                                                                                                                                                                                                                                                                                                                                                                                                                                                                                                                                                                                                                                                                                                                                                                                                                                                                                                                                                                                                                                                                                                                                                                                                                                                                                                                                                                                                                                                                                                                                                                                                                                                                                                                                                                                                                                                                                                                                                                                                                                                                                                                                                                                                                                                                                                                                                                                                                                                                                                                                                                                                                                                                                                                                                                                                                                                                                                                                                                                                                                                                                                                                                                                                                                                                                                                                                                                                                                                                                                                                                                                                                                                                                                                                                                                                                                                                                                                                                                                                                                                                                                                                                                                                                                                                                                                                                                                                                                                                                                                                                                                                                                                                                                                                                                                                                                                                                                                                                                                                                                                                                                                                                                                                                                                                                                                                                                                                                                                                                                                                                                                                                                                                                                                                                                                                                                                                                                                                                                                                                                                                                                                                                                                                                                                                                                                                                                                                                                                                                                                                                                                                                                                                                                                                                                                                                                                              |
| VC_353_0  | AF440695,MK002701,MK450543                                                                                                                                                                                                                                                                                                                                                                                                                                                                                                                                                                                                                                                                                                                                                                                                                                                                                                                                                                                                                                                                                                                                                                                                                                                                                                                                                                                                                                                                                                                                                                                                                                                                                                                                                                                                                                                                                                                                                                                                                                                                                                                                                                                                                                                                                                                                                                                                                                                                                                                                                                                                                                                                                                                                                                                                                                                                                                                                                                                                                                                                                                                                                                                                                                                                                                                                                                                                                                                                                                                                                                                                                                                                                                                                                                                                                                                                                                                                                                                                                                                                                                                                                                                                                                                                                                                                                                                                                                                                                                                                                                                                                                                                                                                                                                                                                                                                                                                                                                                                                                                                                                                                                                                                                                                                                                                                                                                                                                                                                                                                                                                                                                                                                                                                                                                                                                                                                                                                                                                                                                                                                                                                                                                                                                                                                                                                                                                                                                                                                                                                                                                                                                                                                                                                                                                                                                                                                                                                                                                                                                                                                                                                                                                                                                                                                                                                                                                                                                                                                                                                                                                                                                                                                                                                                                                                                                                                                                                                                                                                                                                                                                                                                                                                                                                                                                                                                                                                                                                                                                                                                                                                                                                                                                                                                                                                                                                                                                                                                                                                                                                                                                                                                                                                                                                                                                                              |
| VC_354_0  | AF447491,AY453853,CP000625,OK095358,OM892879,OP293079                                                                                                                                                                                                                                                                                                                                                                                                                                                                                                                                                                                                                                                                                                                                                                                                                                                                                                                                                                                                                                                                                                                                                                                                                                                                                                                                                                                                                                                                                                                                                                                                                                                                                                                                                                                                                                                                                                                                                                                                                                                                                                                                                                                                                                                                                                                                                                                                                                                                                                                                                                                                                                                                                                                                                                                                                                                                                                                                                                                                                                                                                                                                                                                                                                                                                                                                                                                                                                                                                                                                                                                                                                                                                                                                                                                                                                                                                                                                                                                                                                                                                                                                                                                                                                                                                                                                                                                                                                                                                                                                                                                                                                                                                                                                                                                                                                                                                                                                                                                                                                                                                                                                                                                                                                                                                                                                                                                                                                                                                                                                                                                                                                                                                                                                                                                                                                                                                                                                                                                                                                                                                                                                                                                                                                                                                                                                                                                                                                                                                                                                                                                                                                                                                                                                                                                                                                                                                                                                                                                                                                                                                                                                                                                                                                                                                                                                                                                                                                                                                                                                                                                                                                                                                                                                                                                                                                                                                                                                                                                                                                                                                                                                                                                                                                                                                                                                                                                                                                                                                                                                                                                                                                                                                                                                                                                                                                                                                                                                                                                                                                                                                                                                                                                                                                                                                                   |
| VC_355_0  | MN512538,MN812722,MT227924,OP125534                                                                                                                                                                                                                                                                                                                                                                                                                                                                                                                                                                                                                                                                                                                                                                                                                                                                                                                                                                                                                                                                                                                                                                                                                                                                                                                                                                                                                                                                                                                                                                                                                                                                                                                                                                                                                                                                                                                                                                                                                                                                                                                                                                                                                                                                                                                                                                                                                                                                                                                                                                                                                                                                                                                                                                                                                                                                                                                                                                                                                                                                                                                                                                                                                                                                                                                                                                                                                                                                                                                                                                                                                                                                                                                                                                                                                                                                                                                                                                                                                                                                                                                                                                                                                                                                                                                                                                                                                                                                                                                                                                                                                                                                                                                                                                                                                                                                                                                                                                                                                                                                                                                                                                                                                                                                                                                                                                                                                                                                                                                                                                                                                                                                                                                                                                                                                                                                                                                                                                                                                                                                                                                                                                                                                                                                                                                                                                                                                                                                                                                                                                                                                                                                                                                                                                                                                                                                                                                                                                                                                                                                                                                                                                                                                                                                                                                                                                                                                                                                                                                                                                                                                                                                                                                                                                                                                                                                                                                                                                                                                                                                                                                                                                                                                                                                                                                                                                                                                                                                                                                                                                                                                                                                                                                                                                                                                                                                                                                                                                                                                                                                                                                                                                                                                                                                                                                     |
| VC_356_0  | MT121967,MW651859                                                                                                                                                                                                                                                                                                                                                                                                                                                                                                                                                                                                                                                                                                                                                                                                                                                                                                                                                                                                                                                                                                                                                                                                                                                                                                                                                                                                                                                                                                                                                                                                                                                                                                                                                                                                                                                                                                                                                                                                                                                                                                                                                                                                                                                                                                                                                                                                                                                                                                                                                                                                                                                                                                                                                                                                                                                                                                                                                                                                                                                                                                                                                                                                                                                                                                                                                                                                                                                                                                                                                                                                                                                                                                                                                                                                                                                                                                                                                                                                                                                                                                                                                                                                                                                                                                                                                                                                                                                                                                                                                                                                                                                                                                                                                                                                                                                                                                                                                                                                                                                                                                                                                                                                                                                                                                                                                                                                                                                                                                                                                                                                                                                                                                                                                                                                                                                                                                                                                                                                                                                                                                                                                                                                                                                                                                                                                                                                                                                                                                                                                                                                                                                                                                                                                                                                                                                                                                                                                                                                                                                                                                                                                                                                                                                                                                                                                                                                                                                                                                                                                                                                                                                                                                                                                                                                                                                                                                                                                                                                                                                                                                                                                                                                                                                                                                                                                                                                                                                                                                                                                                                                                                                                                                                                                                                                                                                                                                                                                                                                                                                                                                                                                                                                                                                                                                                                       |
| VC_357_0  | HQ634187,MK105819                                                                                                                                                                                                                                                                                                                                                                                                                                                                                                                                                                                                                                                                                                                                                                                                                                                                                                                                                                                                                                                                                                                                                                                                                                                                                                                                                                                                                                                                                                                                                                                                                                                                                                                                                                                                                                                                                                                                                                                                                                                                                                                                                                                                                                                                                                                                                                                                                                                                                                                                                                                                                                                                                                                                                                                                                                                                                                                                                                                                                                                                                                                                                                                                                                                                                                                                                                                                                                                                                                                                                                                                                                                                                                                                                                                                                                                                                                                                                                                                                                                                                                                                                                                                                                                                                                                                                                                                                                                                                                                                                                                                                                                                                                                                                                                                                                                                                                                                                                                                                                                                                                                                                                                                                                                                                                                                                                                                                                                                                                                                                                                                                                                                                                                                                                                                                                                                                                                                                                                                                                                                                                                                                                                                                                                                                                                                                                                                                                                                                                                                                                                                                                                                                                                                                                                                                                                                                                                                                                                                                                                                                                                                                                                                                                                                                                                                                                                                                                                                                                                                                                                                                                                                                                                                                                                                                                                                                                                                                                                                                                                                                                                                                                                                                                                                                                                                                                                                                                                                                                                                                                                                                                                                                                                                                                                                                                                                                                                                                                                                                                                                                                                                                                                                                                                                                                                                       |
| VC_358_0  | MT740734,ON170024,ON170027,ON170031,ON170052,ON170057,ON170058,ON170068,ON170071,ON170075,ON170077,ON170079,ON170129,ON170133,ON170134,ON170136,ON170150,ON170172,ON170175,ON170179,ON170181,ON170182,ON170185,ON170187,ON170208,ON170214,ON170228,ON1702                                                                                                                                                                                                                                                                                                                                                                                                                                                                                                                                                                                                                                                                                                                                                                                                                                                                                                                                                                                                                                                                                                                                                                                                                                                                                                                                                                                                                                                                                                                                                                                                                                                                                                                                                                                                                                                                                                                                                                                                                                                                                                                                                                                                                                                                                                                                                                                                                                                                                                                                                                                                                                                                                                                                                                                                                                                                                                                                                                                                                                                                                                                                                                                                                                                                                                                                                                                                                                                                                                                                                                                                                                                                                                                                                                                                                                                                                                                                                                                                                                                                                                                                                                                                                                                                                                                                                                                                                                                                                                                                                                                                                                                                                                                                                                                                                                                                                                                                                                                                                                                                                                                                                                                                                                                                                                                                                                                                                                                                                                                                                                                                                                                                                                                                                                                                                                                                                                                                                                                                                                                                                                                                                                                                                                                                                                                                                                                                                                                                                                                                                                                                                                                                                                                                                                                                                                                                                                                                                                                                                                                                                                                                                                                                                                                                                                                                                                                                                                                                                                                                                                                                                                                                                                                                                                                                                                                                                                                                                                                                                                                                                                                                                                                                                                                                                                                                                                                                                                                                                                                                                                                                                                                                                                                                                                                                                                                                                                                                                                                                                                                                                               |
| VC_359_0  | 29,ON170232,ON170234,ON170236,ON170238,ON170240,ON170242,ON170254,ON170257,ON170262,ON170264,ON170265,ON170267,ON170275,ON170279,ON170286,ON170287,ON170303,ON170317,ON170323,ON170324,ON170326,ON170327,ON170343,ON170355,ON170359                                                                                                                                                                                                                                                                                                                                                                                                                                                                                                                                                                                                                                                                                                                                                                                                                                                                                                                                                                                                                                                                                                                                                                                                                                                                                                                                                                                                                                                                                                                                                                                                                                                                                                                                                                                                                                                                                                                                                                                                                                                                                                                                                                                                                                                                                                                                                                                                                                                                                                                                                                                                                                                                                                                                                                                                                                                                                                                                                                                                                                                                                                                                                                                                                                                                                                                                                                                                                                                                                                                                                                                                                                                                                                                                                                                                                                                                                                                                                                                                                                                                                                                                                                                                                                                                                                                                                                                                                                                                                                                                                                                                                                                                                                                                                                                                                                                                                                                                                                                                                                                                                                                                                                                                                                                                                                                                                                                                                                                                                                                                                                                                                                                                                                                                                                                                                                                                                                                                                                                                                                                                                                                                                                                                                                                                                                                                                                                                                                                                                                                                                                                                                                                                                                                                                                                                                                                                                                                                                                                                                                                                                                                                                                                                                                                                                                                                                                                                                                                                                                                                                                                                                                                                                                                                                                                                                                                                                                                                                                                                                                                                                                                                                                                                                                                                                                                                                                                                                                                                                                                                                                                                                                                                                                                                                                                                                                                                                                                                                                                                                                                                                                                     |
| VC_360_0  | ON170149,ON170171,ON170322                                                                                                                                                                                                                                                                                                                                                                                                                                                                                                                                                                                                                                                                                                                                                                                                                                                                                                                                                                                                                                                                                                                                                                                                                                                                                                                                                                                                                                                                                                                                                                                                                                                                                                                                                                                                                                                                                                                                                                                                                                                                                                                                                                                                                                                                                                                                                                                                                                                                                                                                                                                                                                                                                                                                                                                                                                                                                                                                                                                                                                                                                                                                                                                                                                                                                                                                                                                                                                                                                                                                                                                                                                                                                                                                                                                                                                                                                                                                                                                                                                                                                                                                                                                                                                                                                                                                                                                                                                                                                                                                                                                                                                                                                                                                                                                                                                                                                                                                                                                                                                                                                                                                                                                                                                                                                                                                                                                                                                                                                                                                                                                                                                                                                                                                                                                                                                                                                                                                                                                                                                                                                                                                                                                                                                                                                                                                                                                                                                                                                                                                                                                                                                                                                                                                                                                                                                                                                                                                                                                                                                                                                                                                                                                                                                                                                                                                                                                                                                                                                                                                                                                                                                                                                                                                                                                                                                                                                                                                                                                                                                                                                                                                                                                                                                                                                                                                                                                                                                                                                                                                                                                                                                                                                                                                                                                                                                                                                                                                                                                                                                                                                                                                                                                                                                                                                                                              |
|           | JN585957,MF612073,MH426726,MK618715,MT251347,MT251348,MW722080                                                                                                                                                                                                                                                                                                                                                                                                                                                                                                                                                                                                                                                                                                                                                                                                                                                                                                                                                                                                                                                                                                                                                                                                                                                                                                                                                                                                                                                                                                                                                                                                                                                                                                                                                                                                                                                                                                                                                                                                                                                                                                                                                                                                                                                                                                                                                                                                                                                                                                                                                                                                                                                                                                                                                                                                                                                                                                                                                                                                                                                                                                                                                                                                                                                                                                                                                                                                                                                                                                                                                                                                                                                                                                                                                                                                                                                                                                                                                                                                                                                                                                                                                                                                                                                                                                                                                                                                                                                                                                                                                                                                                                                                                                                                                                                                                                                                                                                                                                                                                                                                                                                                                                                                                                                                                                                                                                                                                                                                                                                                                                                                                                                                                                                                                                                                                                                                                                                                                                                                                                                                                                                                                                                                                                                                                                                                                                                                                                                                                                                                                                                                                                                                                                                                                                                                                                                                                                                                                                                                                                                                                                                                                                                                                                                                                                                                                                                                                                                                                                                                                                                                                                                                                                                                                                                                                                                                                                                                                                                                                                                                                                                                                                                                                                                                                                                                                                                                                                                                                                                                                                                                                                                                                                                                                                                                                                                                                                                                                                                                                                                                                                                                                                                                                                                                                          |
|           | AF454431,AY751298,DQ079896,DQ079899,DQ079900,DQ079901,DQ079902,DQ079903,DQ079904,DQ079906,DQ079908,DQ079909,DQ079910,DQ079911,DQ079912,DQ079913,DQ079914,DQ079915,DQ079916,DQ079917,DQ079918,DQ079919,DQ079920,DQ079921,DQ079922,DQ079923,DQ079924,DQ079925,DQ079926,DQ079927,DQ079928,DQ079929,DQ079930,DQ079931,DQ079932,DQ079933,DQ079934,DQ079935,DQ079936,DQ079937,DQ079938,DQ079939,DQ079940,DQ079941,DQ079942,DQ079943,DQ079944,DQ079945,DQ079946,DQ079947,DQ079948,DQ079949,DQ079950,DQ079951,DQ079952,DQ079953,DQ079954,DQ079955,DQ079956,DQ079957,DQ079958,DQ079959,DQ079960,DQ079961,DQ079962,DQ079963,DQ079964,DQ079965,DQ079966,DQ079967,DQ079968,DQ079969,DQ079970,DQ079971,DQ079972,DQ079973,DQ079974,DQ079975,DQ079976,DQ079977,DQ079978,DQ079979,DQ079980,DQ079981,DQ079982,DQ079983,DQ079984,DQ079985,DQ079986,DQ079987,DQ079988,DQ079989,DQ079990,DQ079991,DQ079992,DQ079993,DQ079994,DQ079995,DQ079996,DQ079997,DQ079998,DQ079999,DQ080000,DQ080001,DQ080002,DQ080003,DQ080004,DQ080005,DQ080006,DQ080007,DQ080008,DQ080009,DQ080010,DQ080011,DQ080012,DQ080013,DQ080014,DQ080015,DQ080016,DQ080017,DQ080018,DQ080019,DQ080020,DQ080021,DQ080022,DQ080023,DQ080024,DQ080025,DQ080026,DQ080027,DQ080028,DQ080029,DQ080030,DQ080031,DQ080032,DQ080033,DQ080034,DQ080035,DQ080036,DQ080037,DQ080038,DQ080039,DQ080040,DQ080041,DQ080042,DQ080043,DQ080044,DQ080045,DQ080046,DQ080047,DQ080048,DQ080049,DQ080050,DQ080051,DQ080052,DQ080053,DQ080054,DQ080055,DQ080056,DQ080057,DQ080058,DQ080059,DQ080060,DQ080061,DQ080062,DQ080063,DQ080064,DQ080065,DQ080066,DQ080067,DQ080068,DQ080069,DQ080070,DQ080071,DQ080072,DQ080073,DQ080074,DQ080075,DQ080076,DQ080077,DQ080078,DQ080079,DQ080080,DQ080081,DQ080082,DQ080083,DQ080084,DQ080085,DQ080086,DQ080087,DQ080088,DQ080089,DQ080090,DQ080091,DQ080092,DQ080093,DQ080094,DQ080095,DQ080096,DQ080097,DQ080098,DQ080099,DQ080100,DQ080101,DQ080102,DQ080103,DQ080104,DQ080105,DQ080106,DQ080107,DQ080108,DQ080109,DQ080110,DQ080111,DQ080112,DQ080113,DQ080114,DQ080115,DQ080116,DQ080117,DQ080118,DQ080119,DQ080120,DQ080121,DQ080122,DQ080123,DQ080124,DQ080125,DQ080126,DQ080127,DQ080128,DQ080129,DQ080130,DQ080131,DQ080132,DQ080133,DQ080134,DQ080135,DQ080136,DQ080137,DQ080138,DQ080139,DQ080140,DQ080141,DQ080142,DQ080143,DQ080144,DQ080145,DQ080146,DQ080147,DQ080148,DQ080149,DQ080150,DQ080151,DQ080152,DQ080153,DQ080154,DQ080155,DQ080156,DQ080157,DQ080158,DQ080159,DQ080160,DQ080161,DQ080162,DQ080163,DQ080164,DQ080165,DQ080166,DQ080167,DQ080168,DQ080169,DQ080170,DQ080171,DQ080172,DQ080173,DQ080174,DQ080175,DQ080176,DQ080177,DQ080178,DQ080179,DQ080180,DQ080181,DQ080182,DQ080183,DQ080184,DQ080185,DQ080186,DQ080187,DQ080188,DQ080189,DQ080190,DQ080191,DQ080192,DQ080193,DQ080194,DQ080195,DQ080196,DQ080197,DQ080198,DQ080199,DQ080200,DQ080201,DQ080202,DQ080203,DQ080204,DQ080205,DQ080206,DQ080207,DQ080208,DQ080209,DQ080210,DQ080211,DQ080212,DQ080213,DQ080214,DQ080215,DQ080216,DQ080217,DQ080218,DQ080219,DQ080220,DQ080221,DQ080222,DQ080223,DQ080224,DQ080225,DQ080226,DQ080227,DQ080228,DQ080229,DQ080230,DQ080231,DQ080232,DQ080233,DQ080234,DQ080235,DQ080236,DQ080237,DQ080238,DQ080239,DQ080240,DQ080241,DQ080242,DQ080243,DQ080244,DQ080245,DQ080246,DQ080247,DQ080248,DQ080249,DQ080250,DQ080251,DQ080252,DQ080253,DQ080254,DQ080255,DQ080256,DQ080257,DQ080258,DQ080259,DQ080260,DQ080261,DQ080262,DQ080263,DQ080264,DQ080265,DQ080266,DQ080267,DQ080268,DQ080269,DQ080270,DQ080271,DQ080272,DQ080273,DQ080274,DQ080275,DQ080276,DQ080277,DQ080278,DQ080279,DQ080280,DQ080281,DQ080282,DQ080283,DQ080284,DQ080285,DQ080286,DQ080287,DQ080288,DQ080289,DQ080290,DQ080291,DQ080292,DQ080293,DQ080294,DQ080295,DQ080296,DQ080297,DQ080298,DQ080299,DQ080300,DQ080301,DQ080302,DQ080303,DQ080304,DQ080305,DQ080306,DQ080307,DQ080308,DQ080309,DQ080310,DQ080311,DQ080312,DQ080313,DQ080314,DQ080315,DQ080316,DQ080317,DQ080318,DQ080319,DQ080320,DQ080321,DQ080322,DQ080323,DQ080324,DQ080325,DQ080326,DQ080327,DQ080328,DQ080329,DQ080330,DQ080331,DQ080332,DQ080333,DQ080334,DQ080335,DQ080336,DQ080337,DQ080338,DQ080339,DQ080340,DQ080341,DQ080342,DQ080343,DQ080344,DQ080345,DQ080346,DQ080347,DQ080348,DQ080349,DQ080350,DQ080351,DQ080352,DQ080353,DQ080354,DQ080355,DQ080356,DQ080357,DQ080358,DQ080359,DQ080360,DQ080361,DQ080362,DQ080363,DQ080364,DQ080365,DQ080366,DQ080367,DQ080368,DQ080369,DQ080370,DQ080371,DQ080372,DQ080373,DQ080374,DQ080375,DQ080376,DQ080377,DQ080378,DQ080379,DQ080380,DQ080381,DQ080382,DQ080383,DQ080384,DQ080385,DQ080386,DQ080387,DQ080388,DQ080389,DQ080390,DQ080391,DQ080392,DQ080393,DQ080394,DQ080395,DQ080396,DQ080397,DQ080398,DQ080399,DQ080400,DQ080401,DQ080402,DQ080403,DQ080404,DQ080405,DQ080406,DQ080407,DQ080408,DQ080409,DQ080410,DQ080411,DQ080412,DQ080413,DQ080414,DQ080415,DQ080416,DQ080417,DQ080418,DQ080419,DQ080420,DQ080421,DQ080422,DQ080423,DQ080424,DQ080425,DQ080426,DQ080427,DQ080428,DQ080429,DQ080430,DQ080431,DQ080432,DQ080433,DQ080434,DQ080435,DQ080436,DQ080437,DQ080438,DQ080439,DQ080440,DQ080441,DQ080442,DQ080443,DQ080444,DQ080445,DQ080446,DQ080447,DQ080448,DQ080449,DQ080450,DQ080451,DQ080452,DQ080453,DQ080454,DQ080455,DQ080456,DQ080457,DQ080458,DQ080459,DQ080460,DQ080461,DQ080462,DQ080463,DQ080464,DQ080465,DQ080466,DQ080467,DQ080468,DQ080469,DQ080470,DQ080471,DQ080472,DQ080473,DQ080474,DQ080475,DQ080476,DQ080477,DQ080478,DQ080479,DQ080480,DQ080481,DQ080482,DQ080483,DQ080484,DQ080485,DQ080486,DQ080487,DQ080488,DQ080489,DQ080490,DQ080491,DQ080492,DQ080493,DQ080494,DQ080495,DQ080496,DQ080497,DQ080498,DQ080499,DQ080500,DQ080501,DQ080502,DQ080503,DQ080504,DQ080505,DQ080506,DQ080507,DQ080508,DQ080509,DQ080510,DQ080511,DQ080512,DQ080513,DQ080514,DQ080515,DQ080516,DQ080517,DQ080518,DQ080519,DQ080520,DQ080521,DQ080522,DQ080523,DQ080524,DQ080525,DQ080526,DQ080527,DQ080528,DQ080529,DQ080530,DQ080531,DQ080532,DQ080533,DQ080534,DQ080535,DQ080536,DQ080537,DQ080538,DQ080539,DQ080540,DQ080541,DQ080542,DQ080543,DQ080544,DQ080545,DQ080546,DQ080547,DQ080548,DQ080549,DQ080550,DQ080551,DQ080552,DQ080553,DQ080554,DQ080555,DQ080556,DQ080557,DQ080558,DQ080559,DQ080560,DQ080561,DQ080562,DQ080563,DQ080564,DQ080565,DQ080566,DQ080567,DQ080568,DQ080569,DQ080570,DQ080571,DQ080572,DQ080573,DQ080574,DQ080575,DQ080576,DQ080577,DQ080578,DQ080579,DQ080580,DQ080581,DQ080582,DQ080583,DQ080584,DQ080585,DQ080586,DQ080587,DQ080588,DQ080589,DQ080590,DQ080591,DQ080592,DQ080593,DQ080594,DQ080595,DQ080596,DQ080597,DQ080598,DQ080599,DQ080600,DQ080601,DQ080602,DQ080603,DQ080604,DQ080605,DQ080606,DQ080607,DQ080608,DQ080609,DQ080610,DQ080611,DQ080612,DQ080613,DQ080614,DQ080615,DQ080616,DQ080617,DQ080618,DQ080619,DQ080620,DQ080621,DQ080622,DQ080623,DQ080624,DQ080625,DQ080626,DQ080627,DQ080628,DQ080629,DQ080630,DQ080631,DQ080632,DQ080633,DQ080634,DQ080635,DQ080636,DQ080637,DQ080638,DQ080639,DQ080640,DQ080641,DQ080642,DQ080643,DQ080644,DQ080645,DQ080646,DQ080647,DQ080648,DQ080649,DQ080650,DQ080651,DQ080652,DQ080653,DQ080654,DQ080655,DQ080656,DQ080657,DQ080658,DQ080659,DQ080660,DQ080661,DQ080662,DQ080663,DQ080664,DQ080665,DQ080666,DQ080667,DQ080668,DQ080669,DQ080670,DQ080671,DQ080672,DQ080673,DQ080674,DQ080675,DQ080676,DQ080677,DQ080678,DQ080679,DQ080680,DQ080681,DQ080682,DQ080683,DQ080684,DQ080685,DQ080686,DQ080687,DQ080688,DQ080689,DQ080690,DQ080691,DQ080692,DQ080693,DQ080694,DQ080695,DQ080696,DQ080697,DQ080698,DQ080699,DQ080700,DQ080701,DQ080702,DQ080703,DQ080704,DQ080705,DQ080706,DQ080707,DQ080708,DQ080709,DQ080710,DQ080711,DQ080712,DQ080713,DQ080714,DQ080715,DQ080716,DQ080717,DQ080718,DQ080719,DQ080720,DQ080721,DQ080722,DQ080723,DQ080724,DQ080725,DQ080726,DQ080727,DQ080728,DQ080729,DQ080730,DQ080731,DQ080732,DQ080733,DQ080734,DQ080735,DQ080736,DQ080737,DQ080738,DQ080739,DQ080740,DQ080741,DQ080742,DQ080743,DQ080744,DQ080745,DQ080746,DQ080747,DQ080748,DQ080749,DQ080750,DQ080751,DQ080752,DQ080753,DQ080754,DQ080755,DQ080756,DQ080757,DQ080758,DQ080759,DQ080760,DQ080761,DQ080762,DQ080763,DQ080764,DQ080765,DQ080766,DQ080767,DQ080768,DQ080769,DQ080770,DQ080771,DQ080772,DQ080773,DQ080774,DQ080775,DQ080776,DQ080777,DQ080778,DQ080779,DQ080780,DQ080781,DQ080782,DQ080783,DQ080784,DQ080785,DQ080786,DQ080787,DQ080788,DQ080789,DQ080790,DQ080791,DQ080792,DQ080793,DQ080794,DQ080795,DQ080796,DQ080797,DQ080798,DQ080799,DQ080800,DQ080801,DQ080802,DQ080803,DQ080804,DQ080805,DQ080806,DQ080807,DQ080808,DQ080809,DQ080810,DQ080811,DQ080812,DQ080813,DQ080814,DQ080815,DQ080816,DQ080817,DQ080818,DQ080819,DQ080820,DQ080821,DQ080822,DQ080823,DQ080824,DQ080825,DQ080826,DQ080827,DQ080828,DQ080829,DQ080830,DQ080831,DQ080832,DQ080833,DQ080834,DQ080835,DQ080836,DQ080837,DQ080838,DQ080839,DQ080840,DQ080841,DQ080842,DQ080843,DQ080844,DQ080845,DQ080846,DQ080847,DQ080848,DQ080849,DQ080850,DQ080851,DQ080852,DQ080853,DQ080854,DQ080855,DQ080856,DQ080857,DQ080858,DQ080859,DQ080860,DQ080861,DQ080862,DQ080863,DQ080864,DQ080865,DQ080866,DQ080867,DQ080868,DQ080869,DQ080870,DQ080871,DQ080872,DQ080873,DQ080874,DQ080875,DQ080876,DQ080877,DQ080878,DQ080879,DQ080880,DQ080881,DQ080882,DQ080883,DQ080884,DQ080885,DQ080886,DQ080887,DQ080888,DQ080889,DQ080890,DQ080891,DQ080892,DQ080893,DQ080894,DQ080895,D |



|           |                                                                                                                                                                                                                                                                                                                                                                                                                                                                                                                                                                                                                                                                                                                                                                                                                                                                                                                                                                                                                                                                                                                                                                                                                                                                                                                                                                                                                                                                                                                                                                                                                                                                                                                                                                                                                                                                                                                                                                                                                                                                                                                                                                                                                                                                                                                                                                                                                                                                                                                                                                                                                                                                                                                                                                                                                                                                                                                                                                                                                                                                                                                                                                                                                                                                                                                                                                                                                                                                                                                                                                                                                                                                                                                                                                                                                                                                                                                                                                                                                                                                                                                                                                                                                                                                                                                                                                                                                                                                                                                                                                                                                                                                                                                                                                                                                                                                                                                                                                                                                                                                                                                                                                                                                                                                                                                                                                                                                                                                                                                                                                                                                                                                                                                                                                                                                                                                                                                                                                                                                                                                                                                                                                                                                                                                                                                                                                                                                                                                                                                                                                                                                                                                                                                                                                                                                                                                                                                                                                                                                                                                                                                                                                                                                                                                                                                                                                                                                                                                                                                                                                                                                                                                                                                                                                                                                                                                                                                                                                                                                                                                                                                                                                                                                                                                                                                                                               |
|-----------|---------------------------------------------------------------------------------------------------------------------------------------------------------------------------------------------------------------------------------------------------------------------------------------------------------------------------------------------------------------------------------------------------------------------------------------------------------------------------------------------------------------------------------------------------------------------------------------------------------------------------------------------------------------------------------------------------------------------------------------------------------------------------------------------------------------------------------------------------------------------------------------------------------------------------------------------------------------------------------------------------------------------------------------------------------------------------------------------------------------------------------------------------------------------------------------------------------------------------------------------------------------------------------------------------------------------------------------------------------------------------------------------------------------------------------------------------------------------------------------------------------------------------------------------------------------------------------------------------------------------------------------------------------------------------------------------------------------------------------------------------------------------------------------------------------------------------------------------------------------------------------------------------------------------------------------------------------------------------------------------------------------------------------------------------------------------------------------------------------------------------------------------------------------------------------------------------------------------------------------------------------------------------------------------------------------------------------------------------------------------------------------------------------------------------------------------------------------------------------------------------------------------------------------------------------------------------------------------------------------------------------------------------------------------------------------------------------------------------------------------------------------------------------------------------------------------------------------------------------------------------------------------------------------------------------------------------------------------------------------------------------------------------------------------------------------------------------------------------------------------------------------------------------------------------------------------------------------------------------------------------------------------------------------------------------------------------------------------------------------------------------------------------------------------------------------------------------------------------------------------------------------------------------------------------------------------------------------------------------------------------------------------------------------------------------------------------------------------------------------------------------------------------------------------------------------------------------------------------------------------------------------------------------------------------------------------------------------------------------------------------------------------------------------------------------------------------------------------------------------------------------------------------------------------------------------------------------------------------------------------------------------------------------------------------------------------------------------------------------------------------------------------------------------------------------------------------------------------------------------------------------------------------------------------------------------------------------------------------------------------------------------------------------------------------------------------------------------------------------------------------------------------------------------------------------------------------------------------------------------------------------------------------------------------------------------------------------------------------------------------------------------------------------------------------------------------------------------------------------------------------------------------------------------------------------------------------------------------------------------------------------------------------------------------------------------------------------------------------------------------------------------------------------------------------------------------------------------------------------------------------------------------------------------------------------------------------------------------------------------------------------------------------------------------------------------------------------------------------------------------------------------------------------------------------------------------------------------------------------------------------------------------------------------------------------------------------------------------------------------------------------------------------------------------------------------------------------------------------------------------------------------------------------------------------------------------------------------------------------------------------------------------------------------------------------------------------------------------------------------------------------------------------------------------------------------------------------------------------------------------------------------------------------------------------------------------------------------------------------------------------------------------------------------------------------------------------------------------------------------------------------------------------------------------------------------------------------------------------------------------------------------------------------------------------------------------------------------------------------------------------------------------------------------------------------------------------------------------------------------------------------------------------------------------------------------------------------------------------------------------------------------------------------------------------------------------------------------------------------------------------------------------------------------------------------------------------------------------------------------------------------------------------------------------------------------------------------------------------------------------------------------------------------------------------------------------------------------------------------------------------------------------------------------------------------------------------------------------------------------------------------------------------------------------------------------------------------------------------------------------------------------------------------------------------------------------------------------------------------------------------------------------------------------------------------------------------------------------------------------------------------------------------------------------------------------------------------------------------------------|
| VC_362_0  | GQ153921,KC237308                                                                                                                                                                                                                                                                                                                                                                                                                                                                                                                                                                                                                                                                                                                                                                                                                                                                                                                                                                                                                                                                                                                                                                                                                                                                                                                                                                                                                                                                                                                                                                                                                                                                                                                                                                                                                                                                                                                                                                                                                                                                                                                                                                                                                                                                                                                                                                                                                                                                                                                                                                                                                                                                                                                                                                                                                                                                                                                                                                                                                                                                                                                                                                                                                                                                                                                                                                                                                                                                                                                                                                                                                                                                                                                                                                                                                                                                                                                                                                                                                                                                                                                                                                                                                                                                                                                                                                                                                                                                                                                                                                                                                                                                                                                                                                                                                                                                                                                                                                                                                                                                                                                                                                                                                                                                                                                                                                                                                                                                                                                                                                                                                                                                                                                                                                                                                                                                                                                                                                                                                                                                                                                                                                                                                                                                                                                                                                                                                                                                                                                                                                                                                                                                                                                                                                                                                                                                                                                                                                                                                                                                                                                                                                                                                                                                                                                                                                                                                                                                                                                                                                                                                                                                                                                                                                                                                                                                                                                                                                                                                                                                                                                                                                                                                                                                                                                                             |
| VC_363_0  | OK338687,OM055665                                                                                                                                                                                                                                                                                                                                                                                                                                                                                                                                                                                                                                                                                                                                                                                                                                                                                                                                                                                                                                                                                                                                                                                                                                                                                                                                                                                                                                                                                                                                                                                                                                                                                                                                                                                                                                                                                                                                                                                                                                                                                                                                                                                                                                                                                                                                                                                                                                                                                                                                                                                                                                                                                                                                                                                                                                                                                                                                                                                                                                                                                                                                                                                                                                                                                                                                                                                                                                                                                                                                                                                                                                                                                                                                                                                                                                                                                                                                                                                                                                                                                                                                                                                                                                                                                                                                                                                                                                                                                                                                                                                                                                                                                                                                                                                                                                                                                                                                                                                                                                                                                                                                                                                                                                                                                                                                                                                                                                                                                                                                                                                                                                                                                                                                                                                                                                                                                                                                                                                                                                                                                                                                                                                                                                                                                                                                                                                                                                                                                                                                                                                                                                                                                                                                                                                                                                                                                                                                                                                                                                                                                                                                                                                                                                                                                                                                                                                                                                                                                                                                                                                                                                                                                                                                                                                                                                                                                                                                                                                                                                                                                                                                                                                                                                                                                                                                             |
| VC_364_0  | AP008986,KY210139,MC944227,MC944228,MC944229,MC944230,MC944231,MC944232,MC944233,MC944234,MC944235,MC944236,MN461279,OK275494,ON996340,OP067662                                                                                                                                                                                                                                                                                                                                                                                                                                                                                                                                                                                                                                                                                                                                                                                                                                                                                                                                                                                                                                                                                                                                                                                                                                                                                                                                                                                                                                                                                                                                                                                                                                                                                                                                                                                                                                                                                                                                                                                                                                                                                                                                                                                                                                                                                                                                                                                                                                                                                                                                                                                                                                                                                                                                                                                                                                                                                                                                                                                                                                                                                                                                                                                                                                                                                                                                                                                                                                                                                                                                                                                                                                                                                                                                                                                                                                                                                                                                                                                                                                                                                                                                                                                                                                                                                                                                                                                                                                                                                                                                                                                                                                                                                                                                                                                                                                                                                                                                                                                                                                                                                                                                                                                                                                                                                                                                                                                                                                                                                                                                                                                                                                                                                                                                                                                                                                                                                                                                                                                                                                                                                                                                                                                                                                                                                                                                                                                                                                                                                                                                                                                                                                                                                                                                                                                                                                                                                                                                                                                                                                                                                                                                                                                                                                                                                                                                                                                                                                                                                                                                                                                                                                                                                                                                                                                                                                                                                                                                                                                                                                                                                                                                                                                                               |
| VC_369_0  | JQ177063,KY290953,KY290954,MH179474,MK804891,MK804892                                                                                                                                                                                                                                                                                                                                                                                                                                                                                                                                                                                                                                                                                                                                                                                                                                                                                                                                                                                                                                                                                                                                                                                                                                                                                                                                                                                                                                                                                                                                                                                                                                                                                                                                                                                                                                                                                                                                                                                                                                                                                                                                                                                                                                                                                                                                                                                                                                                                                                                                                                                                                                                                                                                                                                                                                                                                                                                                                                                                                                                                                                                                                                                                                                                                                                                                                                                                                                                                                                                                                                                                                                                                                                                                                                                                                                                                                                                                                                                                                                                                                                                                                                                                                                                                                                                                                                                                                                                                                                                                                                                                                                                                                                                                                                                                                                                                                                                                                                                                                                                                                                                                                                                                                                                                                                                                                                                                                                                                                                                                                                                                                                                                                                                                                                                                                                                                                                                                                                                                                                                                                                                                                                                                                                                                                                                                                                                                                                                                                                                                                                                                                                                                                                                                                                                                                                                                                                                                                                                                                                                                                                                                                                                                                                                                                                                                                                                                                                                                                                                                                                                                                                                                                                                                                                                                                                                                                                                                                                                                                                                                                                                                                                                                                                                                                                         |
| VC_37_0   | OM046621,OM046622,OM046623,OM046625,OM046629                                                                                                                                                                                                                                                                                                                                                                                                                                                                                                                                                                                                                                                                                                                                                                                                                                                                                                                                                                                                                                                                                                                                                                                                                                                                                                                                                                                                                                                                                                                                                                                                                                                                                                                                                                                                                                                                                                                                                                                                                                                                                                                                                                                                                                                                                                                                                                                                                                                                                                                                                                                                                                                                                                                                                                                                                                                                                                                                                                                                                                                                                                                                                                                                                                                                                                                                                                                                                                                                                                                                                                                                                                                                                                                                                                                                                                                                                                                                                                                                                                                                                                                                                                                                                                                                                                                                                                                                                                                                                                                                                                                                                                                                                                                                                                                                                                                                                                                                                                                                                                                                                                                                                                                                                                                                                                                                                                                                                                                                                                                                                                                                                                                                                                                                                                                                                                                                                                                                                                                                                                                                                                                                                                                                                                                                                                                                                                                                                                                                                                                                                                                                                                                                                                                                                                                                                                                                                                                                                                                                                                                                                                                                                                                                                                                                                                                                                                                                                                                                                                                                                                                                                                                                                                                                                                                                                                                                                                                                                                                                                                                                                                                                                                                                                                                                                                                  |
| VC_37_1   | KU052037,MN013086,OL396571                                                                                                                                                                                                                                                                                                                                                                                                                                                                                                                                                                                                                                                                                                                                                                                                                                                                                                                                                                                                                                                                                                                                                                                                                                                                                                                                                                                                                                                                                                                                                                                                                                                                                                                                                                                                                                                                                                                                                                                                                                                                                                                                                                                                                                                                                                                                                                                                                                                                                                                                                                                                                                                                                                                                                                                                                                                                                                                                                                                                                                                                                                                                                                                                                                                                                                                                                                                                                                                                                                                                                                                                                                                                                                                                                                                                                                                                                                                                                                                                                                                                                                                                                                                                                                                                                                                                                                                                                                                                                                                                                                                                                                                                                                                                                                                                                                                                                                                                                                                                                                                                                                                                                                                                                                                                                                                                                                                                                                                                                                                                                                                                                                                                                                                                                                                                                                                                                                                                                                                                                                                                                                                                                                                                                                                                                                                                                                                                                                                                                                                                                                                                                                                                                                                                                                                                                                                                                                                                                                                                                                                                                                                                                                                                                                                                                                                                                                                                                                                                                                                                                                                                                                                                                                                                                                                                                                                                                                                                                                                                                                                                                                                                                                                                                                                                                                                                    |
| VC_371_0  | MT897903,ON456342                                                                                                                                                                                                                                                                                                                                                                                                                                                                                                                                                                                                                                                                                                                                                                                                                                                                                                                                                                                                                                                                                                                                                                                                                                                                                                                                                                                                                                                                                                                                                                                                                                                                                                                                                                                                                                                                                                                                                                                                                                                                                                                                                                                                                                                                                                                                                                                                                                                                                                                                                                                                                                                                                                                                                                                                                                                                                                                                                                                                                                                                                                                                                                                                                                                                                                                                                                                                                                                                                                                                                                                                                                                                                                                                                                                                                                                                                                                                                                                                                                                                                                                                                                                                                                                                                                                                                                                                                                                                                                                                                                                                                                                                                                                                                                                                                                                                                                                                                                                                                                                                                                                                                                                                                                                                                                                                                                                                                                                                                                                                                                                                                                                                                                                                                                                                                                                                                                                                                                                                                                                                                                                                                                                                                                                                                                                                                                                                                                                                                                                                                                                                                                                                                                                                                                                                                                                                                                                                                                                                                                                                                                                                                                                                                                                                                                                                                                                                                                                                                                                                                                                                                                                                                                                                                                                                                                                                                                                                                                                                                                                                                                                                                                                                                                                                                                                                             |
| VC_371_1  | KJ595576,KM347890,KR997967,KY006474,MH926060,MK279910,MK524512,MK524526,MN585967,MN586058,MW534377                                                                                                                                                                                                                                                                                                                                                                                                                                                                                                                                                                                                                                                                                                                                                                                                                                                                                                                                                                                                                                                                                                                                                                                                                                                                                                                                                                                                                                                                                                                                                                                                                                                                                                                                                                                                                                                                                                                                                                                                                                                                                                                                                                                                                                                                                                                                                                                                                                                                                                                                                                                                                                                                                                                                                                                                                                                                                                                                                                                                                                                                                                                                                                                                                                                                                                                                                                                                                                                                                                                                                                                                                                                                                                                                                                                                                                                                                                                                                                                                                                                                                                                                                                                                                                                                                                                                                                                                                                                                                                                                                                                                                                                                                                                                                                                                                                                                                                                                                                                                                                                                                                                                                                                                                                                                                                                                                                                                                                                                                                                                                                                                                                                                                                                                                                                                                                                                                                                                                                                                                                                                                                                                                                                                                                                                                                                                                                                                                                                                                                                                                                                                                                                                                                                                                                                                                                                                                                                                                                                                                                                                                                                                                                                                                                                                                                                                                                                                                                                                                                                                                                                                                                                                                                                                                                                                                                                                                                                                                                                                                                                                                                                                                                                                                                                            |
| VC_371_10 | MH590594                                                                                                                                                                                                                                                                                                                                                                                                                                                                                                                                                                                                                                                                                                                                                                                                                                                                                                                                                                                                                                                                                                                                                                                                                                                                                                                                                                                                                                                                                                                                                                                                                                                                                                                                                                                                                                                                                                                                                                                                                                                                                                                                                                                                                                                                                                                                                                                                                                                                                                                                                                                                                                                                                                                                                                                                                                                                                                                                                                                                                                                                                                                                                                                                                                                                                                                                                                                                                                                                                                                                                                                                                                                                                                                                                                                                                                                                                                                                                                                                                                                                                                                                                                                                                                                                                                                                                                                                                                                                                                                                                                                                                                                                                                                                                                                                                                                                                                                                                                                                                                                                                                                                                                                                                                                                                                                                                                                                                                                                                                                                                                                                                                                                                                                                                                                                                                                                                                                                                                                                                                                                                                                                                                                                                                                                                                                                                                                                                                                                                                                                                                                                                                                                                                                                                                                                                                                                                                                                                                                                                                                                                                                                                                                                                                                                                                                                                                                                                                                                                                                                                                                                                                                                                                                                                                                                                                                                                                                                                                                                                                                                                                                                                                                                                                                                                                                                                      |
| VC_371_11 | KX592589,MF155947,MF668276,MF919528,MF919539,MG757159,MH230874,MH513980,MH590588,MK112539,MK112546,MK112551,MK279843,MK279865,MK279870,MK279873,MK279878,MK279894,MK279895,MK279897,MN369744,MT310868,MT316460,MT316463,MW534381,MW712720,MW86298                                                                                                                                                                                                                                                                                                                                                                                                                                                                                                                                                                                                                                                                                                                                                                                                                                                                                                                                                                                                                                                                                                                                                                                                                                                                                                                                                                                                                                                                                                                                                                                                                                                                                                                                                                                                                                                                                                                                                                                                                                                                                                                                                                                                                                                                                                                                                                                                                                                                                                                                                                                                                                                                                                                                                                                                                                                                                                                                                                                                                                                                                                                                                                                                                                                                                                                                                                                                                                                                                                                                                                                                                                                                                                                                                                                                                                                                                                                                                                                                                                                                                                                                                                                                                                                                                                                                                                                                                                                                                                                                                                                                                                                                                                                                                                                                                                                                                                                                                                                                                                                                                                                                                                                                                                                                                                                                                                                                                                                                                                                                                                                                                                                                                                                                                                                                                                                                                                                                                                                                                                                                                                                                                                                                                                                                                                                                                                                                                                                                                                                                                                                                                                                                                                                                                                                                                                                                                                                                                                                                                                                                                                                                                                                                                                                                                                                                                                                                                                                                                                                                                                                                                                                                                                                                                                                                                                                                                                                                                                                                                                                                                                             |
| VC_371_12 | 0,MW862993,MZ648038,ON637769,OP434459                                                                                                                                                                                                                                                                                                                                                                                                                                                                                                                                                                                                                                                                                                                                                                                                                                                                                                                                                                                                                                                                                                                                                                                                                                                                                                                                                                                                                                                                                                                                                                                                                                                                                                                                                                                                                                                                                                                                                                                                                                                                                                                                                                                                                                                                                                                                                                                                                                                                                                                                                                                                                                                                                                                                                                                                                                                                                                                                                                                                                                                                                                                                                                                                                                                                                                                                                                                                                                                                                                                                                                                                                                                                                                                                                                                                                                                                                                                                                                                                                                                                                                                                                                                                                                                                                                                                                                                                                                                                                                                                                                                                                                                                                                                                                                                                                                                                                                                                                                                                                                                                                                                                                                                                                                                                                                                                                                                                                                                                                                                                                                                                                                                                                                                                                                                                                                                                                                                                                                                                                                                                                                                                                                                                                                                                                                                                                                                                                                                                                                                                                                                                                                                                                                                                                                                                                                                                                                                                                                                                                                                                                                                                                                                                                                                                                                                                                                                                                                                                                                                                                                                                                                                                                                                                                                                                                                                                                                                                                                                                                                                                                                                                                                                                                                                                                                                         |
| VC_371_13 | MK112544,MT310867,MT952849,ON456332                                                                                                                                                                                                                                                                                                                                                                                                                                                                                                                                                                                                                                                                                                                                                                                                                                                                                                                                                                                                                                                                                                                                                                                                                                                                                                                                                                                                                                                                                                                                                                                                                                                                                                                                                                                                                                                                                                                                                                                                                                                                                                                                                                                                                                                                                                                                                                                                                                                                                                                                                                                                                                                                                                                                                                                                                                                                                                                                                                                                                                                                                                                                                                                                                                                                                                                                                                                                                                                                                                                                                                                                                                                                                                                                                                                                                                                                                                                                                                                                                                                                                                                                                                                                                                                                                                                                                                                                                                                                                                                                                                                                                                                                                                                                                                                                                                                                                                                                                                                                                                                                                                                                                                                                                                                                                                                                                                                                                                                                                                                                                                                                                                                                                                                                                                                                                                                                                                                                                                                                                                                                                                                                                                                                                                                                                                                                                                                                                                                                                                                                                                                                                                                                                                                                                                                                                                                                                                                                                                                                                                                                                                                                                                                                                                                                                                                                                                                                                                                                                                                                                                                                                                                                                                                                                                                                                                                                                                                                                                                                                                                                                                                                                                                                                                                                                                                           |
| VC_371_14 | JN192463,KM363597,KR029086,KR029087,KX576645,KX576646,KX576647,KX702319,KY385380,KY385382,KY385383,MF919511,MG757164,MG757165,MC944223,MC962363,MH051251,MH155874,MH316568,MH371107,MH479916,MH479918,MH513973,MH576958,MK279850,MK279858,MK279864,MK279883,MK279890,MK279891,MN585965,MN945903,ON456330                                                                                                                                                                                                                                                                                                                                                                                                                                                                                                                                                                                                                                                                                                                                                                                                                                                                                                                                                                                                                                                                                                                                                                                                                                                                                                                                                                                                                                                                                                                                                                                                                                                                                                                                                                                                                                                                                                                                                                                                                                                                                                                                                                                                                                                                                                                                                                                                                                                                                                                                                                                                                                                                                                                                                                                                                                                                                                                                                                                                                                                                                                                                                                                                                                                                                                                                                                                                                                                                                                                                                                                                                                                                                                                                                                                                                                                                                                                                                                                                                                                                                                                                                                                                                                                                                                                                                                                                                                                                                                                                                                                                                                                                                                                                                                                                                                                                                                                                                                                                                                                                                                                                                                                                                                                                                                                                                                                                                                                                                                                                                                                                                                                                                                                                                                                                                                                                                                                                                                                                                                                                                                                                                                                                                                                                                                                                                                                                                                                                                                                                                                                                                                                                                                                                                                                                                                                                                                                                                                                                                                                                                                                                                                                                                                                                                                                                                                                                                                                                                                                                                                                                                                                                                                                                                                                                                                                                                                                                                                                                                                                      |
| VC_371_15 | MN369738                                                                                                                                                                                                                                                                                                                                                                                                                                                                                                                                                                                                                                                                                                                                                                                                                                                                                                                                                                                                                                                                                                                                                                                                                                                                                                                                                                                                                                                                                                                                                                                                                                                                                                                                                                                                                                                                                                                                                                                                                                                                                                                                                                                                                                                                                                                                                                                                                                                                                                                                                                                                                                                                                                                                                                                                                                                                                                                                                                                                                                                                                                                                                                                                                                                                                                                                                                                                                                                                                                                                                                                                                                                                                                                                                                                                                                                                                                                                                                                                                                                                                                                                                                                                                                                                                                                                                                                                                                                                                                                                                                                                                                                                                                                                                                                                                                                                                                                                                                                                                                                                                                                                                                                                                                                                                                                                                                                                                                                                                                                                                                                                                                                                                                                                                                                                                                                                                                                                                                                                                                                                                                                                                                                                                                                                                                                                                                                                                                                                                                                                                                                                                                                                                                                                                                                                                                                                                                                                                                                                                                                                                                                                                                                                                                                                                                                                                                                                                                                                                                                                                                                                                                                                                                                                                                                                                                                                                                                                                                                                                                                                                                                                                                                                                                                                                                                                                      |
| VC_371_16 | GQ303264,GQ303266,JF704103,JF704109,JF937097,JF957056,JN006063,JN638752,JN638753,JN699008,JN699010,KM408320,KP027208,KTS99441,KU867907,KX578071,KX670813,KX683292,KX683293,KY676783,MG770212,MC925346,MC925350,MC944225,MH399775,MH399786,MH576970,MH651184,MH825702,MH825705,MK112527,MK112536,MK112555,MK279855,MK279859,MK279861,MK279866,MK279879,MK279881,MK279882,MK279885,MK279887,MK279888,MW712726                                                                                                                                                                                                                                                                                                                                                                                                                                                                                                                                                                                                                                                                                                                                                                                                                                                                                                                                                                                                                                                                                                                                                                                                                                                                                                                                                                                                                                                                                                                                                                                                                                                                                                                                                                                                                                                                                                                                                                                                                                                                                                                                                                                                                                                                                                                                                                                                                                                                                                                                                                                                                                                                                                                                                                                                                                                                                                                                                                                                                                                                                                                                                                                                                                                                                                                                                                                                                                                                                                                                                                                                                                                                                                                                                                                                                                                                                                                                                                                                                                                                                                                                                                                                                                                                                                                                                                                                                                                                                                                                                                                                                                                                                                                                                                                                                                                                                                                                                                                                                                                                                                                                                                                                                                                                                                                                                                                                                                                                                                                                                                                                                                                                                                                                                                                                                                                                                                                                                                                                                                                                                                                                                                                                                                                                                                                                                                                                                                                                                                                                                                                                                                                                                                                                                                                                                                                                                                                                                                                                                                                                                                                                                                                                                                                                                                                                                                                                                                                                                                                                                                                                                                                                                                                                                                                                                                                                                                                                                   |
| VC_371_17 | AF547430,DQ398046,FJ174694,GU247133,GU247134,JF704102,JN699009,JX649096,JX649097,JX649100,KJ194580,KJ194583,KX6369585,KX620786,MG757158,MC925348,MC962365,MH371114,MH371117,MH371125,MH399773,MH399780,MH450116,MH450122,MH479914,MH479921,MH651175,MH651186,MH727555,MH744417,MH779516,MK112542,MK112553,MK279846,MK279852,MK279871,MK494104,MN945899,MT897909,MW534379,MW534380,MZ622173                                                                                                                                                                                                                                                                                                                                                                                                                                                                                                                                                                                                                                                                                                                                                                                                                                                                                                                                                                                                                                                                                                                                                                                                                                                                                                                                                                                                                                                                                                                                                                                                                                                                                                                                                                                                                                                                                                                                                                                                                                                                                                                                                                                                                                                                                                                                                                                                                                                                                                                                                                                                                                                                                                                                                                                                                                                                                                                                                                                                                                                                                                                                                                                                                                                                                                                                                                                                                                                                                                                                                                                                                                                                                                                                                                                                                                                                                                                                                                                                                                                                                                                                                                                                                                                                                                                                                                                                                                                                                                                                                                                                                                                                                                                                                                                                                                                                                                                                                                                                                                                                                                                                                                                                                                                                                                                                                                                                                                                                                                                                                                                                                                                                                                                                                                                                                                                                                                                                                                                                                                                                                                                                                                                                                                                                                                                                                                                                                                                                                                                                                                                                                                                                                                                                                                                                                                                                                                                                                                                                                                                                                                                                                                                                                                                                                                                                                                                                                                                                                                                                                                                                                                                                                                                                                                                                                                                                                                                                                                    |
| VC_371_18 | JF937095,JN698990,JN699017                                                                                                                                                                                                                                                                                                                                                                                                                                                                                                                                                                                                                                                                                                                                                                                                                                                                                                                                                                                                                                                                                                                                                                                                                                                                                                                                                                                                                                                                                                                                                                                                                                                                                                                                                                                                                                                                                                                                                                                                                                                                                                                                                                                                                                                                                                                                                                                                                                                                                                                                                                                                                                                                                                                                                                                                                                                                                                                                                                                                                                                                                                                                                                                                                                                                                                                                                                                                                                                                                                                                                                                                                                                                                                                                                                                                                                                                                                                                                                                                                                                                                                                                                                                                                                                                                                                                                                                                                                                                                                                                                                                                                                                                                                                                                                                                                                                                                                                                                                                                                                                                                                                                                                                                                                                                                                                                                                                                                                                                                                                                                                                                                                                                                                                                                                                                                                                                                                                                                                                                                                                                                                                                                                                                                                                                                                                                                                                                                                                                                                                                                                                                                                                                                                                                                                                                                                                                                                                                                                                                                                                                                                                                                                                                                                                                                                                                                                                                                                                                                                                                                                                                                                                                                                                                                                                                                                                                                                                                                                                                                                                                                                                                                                                                                                                                                                                                    |
| VC_371_19 | JF704091,JF937109,JN698989,KJ194579,KP027197,KP027209,KR816508,KX576643,KY965066,MT897901                                                                                                                                                                                                                                                                                                                                                                                                                                                                                                                                                                                                                                                                                                                                                                                                                                                                                                                                                                                                                                                                                                                                                                                                                                                                                                                                                                                                                                                                                                                                                                                                                                                                                                                                                                                                                                                                                                                                                                                                                                                                                                                                                                                                                                                                                                                                                                                                                                                                                                                                                                                                                                                                                                                                                                                                                                                                                                                                                                                                                                                                                                                                                                                                                                                                                                                                                                                                                                                                                                                                                                                                                                                                                                                                                                                                                                                                                                                                                                                                                                                                                                                                                                                                                                                                                                                                                                                                                                                                                                                                                                                                                                                                                                                                                                                                                                                                                                                                                                                                                                                                                                                                                                                                                                                                                                                                                                                                                                                                                                                                                                                                                                                                                                                                                                                                                                                                                                                                                                                                                                                                                                                                                                                                                                                                                                                                                                                                                                                                                                                                                                                                                                                                                                                                                                                                                                                                                                                                                                                                                                                                                                                                                                                                                                                                                                                                                                                                                                                                                                                                                                                                                                                                                                                                                                                                                                                                                                                                                                                                                                                                                                                                                                                                                                                                     |
| VC_371_2  | MZ622172                                                                                                                                                                                                                                                                                                                                                                                                                                                                                                                                                                                                                                                                                                                                                                                                                                                                                                                                                                                                                                                                                                                                                                                                                                                                                                                                                                                                                                                                                                                                                                                                                                                                                                                                                                                                                                                                                                                                                                                                                                                                                                                                                                                                                                                                                                                                                                                                                                                                                                                                                                                                                                                                                                                                                                                                                                                                                                                                                                                                                                                                                                                                                                                                                                                                                                                                                                                                                                                                                                                                                                                                                                                                                                                                                                                                                                                                                                                                                                                                                                                                                                                                                                                                                                                                                                                                                                                                                                                                                                                                                                                                                                                                                                                                                                                                                                                                                                                                                                                                                                                                                                                                                                                                                                                                                                                                                                                                                                                                                                                                                                                                                                                                                                                                                                                                                                                                                                                                                                                                                                                                                                                                                                                                                                                                                                                                                                                                                                                                                                                                                                                                                                                                                                                                                                                                                                                                                                                                                                                                                                                                                                                                                                                                                                                                                                                                                                                                                                                                                                                                                                                                                                                                                                                                                                                                                                                                                                                                                                                                                                                                                                                                                                                                                                                                                                                                                      |
| VC_371_20 | KC576784,KJ567044,MC925356,MC962375,MH077582,MK112552,MK279889,MN096366                                                                                                                                                                                                                                                                                                                                                                                                                                                                                                                                                                                                                                                                                                                                                                                                                                                                                                                                                                                                                                                                                                                                                                                                                                                                                                                                                                                                                                                                                                                                                                                                                                                                                                                                                                                                                                                                                                                                                                                                                                                                                                                                                                                                                                                                                                                                                                                                                                                                                                                                                                                                                                                                                                                                                                                                                                                                                                                                                                                                                                                                                                                                                                                                                                                                                                                                                                                                                                                                                                                                                                                                                                                                                                                                                                                                                                                                                                                                                                                                                                                                                                                                                                                                                                                                                                                                                                                                                                                                                                                                                                                                                                                                                                                                                                                                                                                                                                                                                                                                                                                                                                                                                                                                                                                                                                                                                                                                                                                                                                                                                                                                                                                                                                                                                                                                                                                                                                                                                                                                                                                                                                                                                                                                                                                                                                                                                                                                                                                                                                                                                                                                                                                                                                                                                                                                                                                                                                                                                                                                                                                                                                                                                                                                                                                                                                                                                                                                                                                                                                                                                                                                                                                                                                                                                                                                                                                                                                                                                                                                                                                                                                                                                                                                                                                                                       |
| VC_371_21 | MN703415                                                                                                                                                                                                                                                                                                                                                                                                                                                                                                                                                                                                                                                                                                                                                                                                                                                                                                                                                                                                                                                                                                                                                                                                                                                                                                                                                                                                                                                                                                                                                                                                                                                                                                                                                                                                                                                                                                                                                                                                                                                                                                                                                                                                                                                                                                                                                                                                                                                                                                                                                                                                                                                                                                                                                                                                                                                                                                                                                                                                                                                                                                                                                                                                                                                                                                                                                                                                                                                                                                                                                                                                                                                                                                                                                                                                                                                                                                                                                                                                                                                                                                                                                                                                                                                                                                                                                                                                                                                                                                                                                                                                                                                                                                                                                                                                                                                                                                                                                                                                                                                                                                                                                                                                                                                                                                                                                                                                                                                                                                                                                                                                                                                                                                                                                                                                                                                                                                                                                                                                                                                                                                                                                                                                                                                                                                                                                                                                                                                                                                                                                                                                                                                                                                                                                                                                                                                                                                                                                                                                                                                                                                                                                                                                                                                                                                                                                                                                                                                                                                                                                                                                                                                                                                                                                                                                                                                                                                                                                                                                                                                                                                                                                                                                                                                                                                                                                      |
| VC_371_3  | JN006064,KR781349                                                                                                                                                                                                                                                                                                                                                                                                                                                                                                                                                                                                                                                                                                                                                                                                                                                                                                                                                                                                                                                                                                                                                                                                                                                                                                                                                                                                                                                                                                                                                                                                                                                                                                                                                                                                                                                                                                                                                                                                                                                                                                                                                                                                                                                                                                                                                                                                                                                                                                                                                                                                                                                                                                                                                                                                                                                                                                                                                                                                                                                                                                                                                                                                                                                                                                                                                                                                                                                                                                                                                                                                                                                                                                                                                                                                                                                                                                                                                                                                                                                                                                                                                                                                                                                                                                                                                                                                                                                                                                                                                                                                                                                                                                                                                                                                                                                                                                                                                                                                                                                                                                                                                                                                                                                                                                                                                                                                                                                                                                                                                                                                                                                                                                                                                                                                                                                                                                                                                                                                                                                                                                                                                                                                                                                                                                                                                                                                                                                                                                                                                                                                                                                                                                                                                                                                                                                                                                                                                                                                                                                                                                                                                                                                                                                                                                                                                                                                                                                                                                                                                                                                                                                                                                                                                                                                                                                                                                                                                                                                                                                                                                                                                                                                                                                                                                                                             |
| VC_371_4  | GQ303259,JF704099,JX649098,JX649099,KC661274,KC691258,KF713485,KJ174157,KJ538723,KM236502,MF919503,MF919507,MF919523,MF919530,MC925339,MC962362,MH230875,MH779500,MK279877,MK279908,MN444868,MT897902                                                                                                                                                                                                                                                                                                                                                                                                                                                                                                                                                                                                                                                                                                                                                                                                                                                                                                                                                                                                                                                                                                                                                                                                                                                                                                                                                                                                                                                                                                                                                                                                                                                                                                                                                                                                                                                                                                                                                                                                                                                                                                                                                                                                                                                                                                                                                                                                                                                                                                                                                                                                                                                                                                                                                                                                                                                                                                                                                                                                                                                                                                                                                                                                                                                                                                                                                                                                                                                                                                                                                                                                                                                                                                                                                                                                                                                                                                                                                                                                                                                                                                                                                                                                                                                                                                                                                                                                                                                                                                                                                                                                                                                                                                                                                                                                                                                                                                                                                                                                                                                                                                                                                                                                                                                                                                                                                                                                                                                                                                                                                                                                                                                                                                                                                                                                                                                                                                                                                                                                                                                                                                                                                                                                                                                                                                                                                                                                                                                                                                                                                                                                                                                                                                                                                                                                                                                                                                                                                                                                                                                                                                                                                                                                                                                                                                                                                                                                                                                                                                                                                                                                                                                                                                                                                                                                                                                                                                                                                                                                                                                                                                                                                         |
| VC_371_5  | KT364588,MH576954,MH576967,MH651177,MK279904                                                                                                                                                                                                                                                                                                                                                                                                                                                                                                                                                                                                                                                                                                                                                                                                                                                                                                                                                                                                                                                                                                                                                                                                                                                                                                                                                                                                                                                                                                                                                                                                                                                                                                                                                                                                                                                                                                                                                                                                                                                                                                                                                                                                                                                                                                                                                                                                                                                                                                                                                                                                                                                                                                                                                                                                                                                                                                                                                                                                                                                                                                                                                                                                                                                                                                                                                                                                                                                                                                                                                                                                                                                                                                                                                                                                                                                                                                                                                                                                                                                                                                                                                                                                                                                                                                                                                                                                                                                                                                                                                                                                                                                                                                                                                                                                                                                                                                                                                                                                                                                                                                                                                                                                                                                                                                                                                                                                                                                                                                                                                                                                                                                                                                                                                                                                                                                                                                                                                                                                                                                                                                                                                                                                                                                                                                                                                                                                                                                                                                                                                                                                                                                                                                                                                                                                                                                                                                                                                                                                                                                                                                                                                                                                                                                                                                                                                                                                                                                                                                                                                                                                                                                                                                                                                                                                                                                                                                                                                                                                                                                                                                                                                                                                                                                                                                                  |
| VC_371_6  | MH051264,MK310139                                                                                                                                                                                                                                                                                                                                                                                                                                                                                                                                                                                                                                                                                                                                                                                                                                                                                                                                                                                                                                                                                                                                                                                                                                                                                                                                                                                                                                                                                                                                                                                                                                                                                                                                                                                                                                                                                                                                                                                                                                                                                                                                                                                                                                                                                                                                                                                                                                                                                                                                                                                                                                                                                                                                                                                                                                                                                                                                                                                                                                                                                                                                                                                                                                                                                                                                                                                                                                                                                                                                                                                                                                                                                                                                                                                                                                                                                                                                                                                                                                                                                                                                                                                                                                                                                                                                                                                                                                                                                                                                                                                                                                                                                                                                                                                                                                                                                                                                                                                                                                                                                                                                                                                                                                                                                                                                                                                                                                                                                                                                                                                                                                                                                                                                                                                                                                                                                                                                                                                                                                                                                                                                                                                                                                                                                                                                                                                                                                                                                                                                                                                                                                                                                                                                                                                                                                                                                                                                                                                                                                                                                                                                                                                                                                                                                                                                                                                                                                                                                                                                                                                                                                                                                                                                                                                                                                                                                                                                                                                                                                                                                                                                                                                                                                                                                                                                             |
| VC_371_7  | MF919519                                                                                                                                                                                                                                                                                                                                                                                                                                                                                                                                                                                                                                                                                                                                                                                                                                                                                                                                                                                                                                                                                                                                                                                                                                                                                                                                                                                                                                                                                                                                                                                                                                                                                                                                                                                                                                                                                                                                                                                                                                                                                                                                                                                                                                                                                                                                                                                                                                                                                                                                                                                                                                                                                                                                                                                                                                                                                                                                                                                                                                                                                                                                                                                                                                                                                                                                                                                                                                                                                                                                                                                                                                                                                                                                                                                                                                                                                                                                                                                                                                                                                                                                                                                                                                                                                                                                                                                                                                                                                                                                                                                                                                                                                                                                                                                                                                                                                                                                                                                                                                                                                                                                                                                                                                                                                                                                                                                                                                                                                                                                                                                                                                                                                                                                                                                                                                                                                                                                                                                                                                                                                                                                                                                                                                                                                                                                                                                                                                                                                                                                                                                                                                                                                                                                                                                                                                                                                                                                                                                                                                                                                                                                                                                                                                                                                                                                                                                                                                                                                                                                                                                                                                                                                                                                                                                                                                                                                                                                                                                                                                                                                                                                                                                                                                                                                                                                                      |
| VC_371_8  | ON970594                                                                                                                                                                                                                                                                                                                                                                                                                                                                                                                                                                                                                                                                                                                                                                                                                                                                                                                                                                                                                                                                                                                                                                                                                                                                                                                                                                                                                                                                                                                                                                                                                                                                                                                                                                                                                                                                                                                                                                                                                                                                                                                                                                                                                                                                                                                                                                                                                                                                                                                                                                                                                                                                                                                                                                                                                                                                                                                                                                                                                                                                                                                                                                                                                                                                                                                                                                                                                                                                                                                                                                                                                                                                                                                                                                                                                                                                                                                                                                                                                                                                                                                                                                                                                                                                                                                                                                                                                                                                                                                                                                                                                                                                                                                                                                                                                                                                                                                                                                                                                                                                                                                                                                                                                                                                                                                                                                                                                                                                                                                                                                                                                                                                                                                                                                                                                                                                                                                                                                                                                                                                                                                                                                                                                                                                                                                                                                                                                                                                                                                                                                                                                                                                                                                                                                                                                                                                                                                                                                                                                                                                                                                                                                                                                                                                                                                                                                                                                                                                                                                                                                                                                                                                                                                                                                                                                                                                                                                                                                                                                                                                                                                                                                                                                                                                                                                                                      |
| VC_371_9  | MZ648041                                                                                                                                                                                                                                                                                                                                                                                                                                                                                                                                                                                                                                                                                                                                                                                                                                                                                                                                                                                                                                                                                                                                                                                                                                                                                                                                                                                                                                                                                                                                                                                                                                                                                                                                                                                                                                                                                                                                                                                                                                                                                                                                                                                                                                                                                                                                                                                                                                                                                                                                                                                                                                                                                                                                                                                                                                                                                                                                                                                                                                                                                                                                                                                                                                                                                                                                                                                                                                                                                                                                                                                                                                                                                                                                                                                                                                                                                                                                                                                                                                                                                                                                                                                                                                                                                                                                                                                                                                                                                                                                                                                                                                                                                                                                                                                                                                                                                                                                                                                                                                                                                                                                                                                                                                                                                                                                                                                                                                                                                                                                                                                                                                                                                                                                                                                                                                                                                                                                                                                                                                                                                                                                                                                                                                                                                                                                                                                                                                                                                                                                                                                                                                                                                                                                                                                                                                                                                                                                                                                                                                                                                                                                                                                                                                                                                                                                                                                                                                                                                                                                                                                                                                                                                                                                                                                                                                                                                                                                                                                                                                                                                                                                                                                                                                                                                                                                                      |
| VC_372_0  | MT776813,MT889369,MZ681520,ON970577                                                                                                                                                                                                                                                                                                                                                                                                                                                                                                                                                                                                                                                                                                                                                                                                                                                                                                                                                                                                                                                                                                                                                                                                                                                                                                                                                                                                                                                                                                                                                                                                                                                                                                                                                                                                                                                                                                                                                                                                                                                                                                                                                                                                                                                                                                                                                                                                                                                                                                                                                                                                                                                                                                                                                                                                                                                                                                                                                                                                                                                                                                                                                                                                                                                                                                                                                                                                                                                                                                                                                                                                                                                                                                                                                                                                                                                                                                                                                                                                                                                                                                                                                                                                                                                                                                                                                                                                                                                                                                                                                                                                                                                                                                                                                                                                                                                                                                                                                                                                                                                                                                                                                                                                                                                                                                                                                                                                                                                                                                                                                                                                                                                                                                                                                                                                                                                                                                                                                                                                                                                                                                                                                                                                                                                                                                                                                                                                                                                                                                                                                                                                                                                                                                                                                                                                                                                                                                                                                                                                                                                                                                                                                                                                                                                                                                                                                                                                                                                                                                                                                                                                                                                                                                                                                                                                                                                                                                                                                                                                                                                                                                                                                                                                                                                                                                                           |
| VC_372_1  | DQ398044,EU770221,JF704094,JF704104,JN699011,KF279411,KF279412,KF279413,KF493881,KR080194,KR080200,KT270441,KX589269,MH513970,MK524486,MN234171,MN369759,MN428050,MT310870,MT639648,MT818419,MT897910,MW435857,ON970575                                                                                                                                                                                                                                                                                                                                                                                                                                                                                                                                                                                                                                                                                                                                                                                                                                                                                                                                                                                                                                                                                                                                                                                                                                                                                                                                                                                                                                                                                                                                                                                                                                                                                                                                                                                                                                                                                                                                                                                                                                                                                                                                                                                                                                                                                                                                                                                                                                                                                                                                                                                                                                                                                                                                                                                                                                                                                                                                                                                                                                                                                                                                                                                                                                                                                                                                                                                                                                                                                                                                                                                                                                                                                                                                                                                                                                                                                                                                                                                                                                                                                                                                                                                                                                                                                                                                                                                                                                                                                                                                                                                                                                                                                                                                                                                                                                                                                                                                                                                                                                                                                                                                                                                                                                                                                                                                                                                                                                                                                                                                                                                                                                                                                                                                                                                                                                                                                                                                                                                                                                                                                                                                                                                                                                                                                                                                                                                                                                                                                                                                                                                                                                                                                                                                                                                                                                                                                                                                                                                                                                                                                                                                                                                                                                                                                                                                                                                                                                                                                                                                                                                                                                                                                                                                                                                                                                                                                                                                                                                                                                                                                                                                       |
| VC_372_2  | JN699007,KF024727,KF416341,KR080199,KY224000,MH727561,MK524490,MN284893,MT889381                                                                                                                                                                                                                                                                                                                                                                                                                                                                                                                                                                                                                                                                                                                                                                                                                                                                                                                                                                                                                                                                                                                                                                                                                                                                                                                                                                                                                                                                                                                                                                                                                                                                                                                                                                                                                                                                                                                                                                                                                                                                                                                                                                                                                                                                                                                                                                                                                                                                                                                                                                                                                                                                                                                                                                                                                                                                                                                                                                                                                                                                                                                                                                                                                                                                                                                                                                                                                                                                                                                                                                                                                                                                                                                                                                                                                                                                                                                                                                                                                                                                                                                                                                                                                                                                                                                                                                                                                                                                                                                                                                                                                                                                                                                                                                                                                                                                                                                                                                                                                                                                                                                                                                                                                                                                                                                                                                                                                                                                                                                                                                                                                                                                                                                                                                                                                                                                                                                                                                                                                                                                                                                                                                                                                                                                                                                                                                                                                                                                                                                                                                                                                                                                                                                                                                                                                                                                                                                                                                                                                                                                                                                                                                                                                                                                                                                                                                                                                                                                                                                                                                                                                                                                                                                                                                                                                                                                                                                                                                                                                                                                                                                                                                                                                                                                              |
| VC_372_3  | MH744423,MK059749,MN617843,MW055906,OL455893                                                                                                                                                                                                                                                                                                                                                                                                                                                                                                                                                                                                                                                                                                                                                                                                                                                                                                                                                                                                                                                                                                                                                                                                                                                                                                                                                                                                                                                                                                                                                                                                                                                                                                                                                                                                                                                                                                                                                                                                                                                                                                                                                                                                                                                                                                                                                                                                                                                                                                                                                                                                                                                                                                                                                                                                                                                                                                                                                                                                                                                                                                                                                                                                                                                                                                                                                                                                                                                                                                                                                                                                                                                                                                                                                                                                                                                                                                                                                                                                                                                                                                                                                                                                                                                                                                                                                                                                                                                                                                                                                                                                                                                                                                                                                                                                                                                                                                                                                                                                                                                                                                                                                                                                                                                                                                                                                                                                                                                                                                                                                                                                                                                                                                                                                                                                                                                                                                                                                                                                                                                                                                                                                                                                                                                                                                                                                                                                                                                                                                                                                                                                                                                                                                                                                                                                                                                                                                                                                                                                                                                                                                                                                                                                                                                                                                                                                                                                                                                                                                                                                                                                                                                                                                                                                                                                                                                                                                                                                                                                                                                                                                                                                                                                                                                                                                                  |
| VC_372_4  | KF024729,KJ433973,KJ433974,KJ433975,KJ433976                                                                                                                                                                                                                                                                                                                                                                                                                                                                                                                                                                                                                                                                                                                                                                                                                                                                                                                                                                                                                                                                                                                                                                                                                                                                                                                                                                                                                                                                                                                                                                                                                                                                                                                                                                                                                                                                                                                                                                                                                                                                                                                                                                                                                                                                                                                                                                                                                                                                                                                                                                                                                                                                                                                                                                                                                                                                                                                                                                                                                                                                                                                                                                                                                                                                                                                                                                                                                                                                                                                                                                                                                                                                                                                                                                                                                                                                                                                                                                                                                                                                                                                                                                                                                                                                                                                                                                                                                                                                                                                                                                                                                                                                                                                                                                                                                                                                                                                                                                                                                                                                                                                                                                                                                                                                                                                                                                                                                                                                                                                                                                                                                                                                                                                                                                                                                                                                                                                                                                                                                                                                                                                                                                                                                                                                                                                                                                                                                                                                                                                                                                                                                                                                                                                                                                                                                                                                                                                                                                                                                                                                                                                                                                                                                                                                                                                                                                                                                                                                                                                                                                                                                                                                                                                                                                                                                                                                                                                                                                                                                                                                                                                                                                                                                                                                                                                  |
| VC_373_0  | MN813693,MZ150786,OP297541                                                                                                                                                                                                                                                                                                                                                                                                                                                                                                                                                                                                                                                                                                                                                                                                                                                                                                                                                                                                                                                                                                                                                                                                                                                                                                                                                                                                                                                                                                                                                                                                                                                                                                                                                                                                                                                                                                                                                                                                                                                                                                                                                                                                                                                                                                                                                                                                                                                                                                                                                                                                                                                                                                                                                                                                                                                                                                                                                                                                                                                                                                                                                                                                                                                                                                                                                                                                                                                                                                                                                                                                                                                                                                                                                                                                                                                                                                                                                                                                                                                                                                                                                                                                                                                                                                                                                                                                                                                                                                                                                                                                                                                                                                                                                                                                                                                                                                                                                                                                                                                                                                                                                                                                                                                                                                                                                                                                                                                                                                                                                                                                                                                                                                                                                                                                                                                                                                                                                                                                                                                                                                                                                                                                                                                                                                                                                                                                                                                                                                                                                                                                                                                                                                                                                                                                                                                                                                                                                                                                                                                                                                                                                                                                                                                                                                                                                                                                                                                                                                                                                                                                                                                                                                                                                                                                                                                                                                                                                                                                                                                                                                                                                                                                                                                                                                                                    |
| VC_374_0  | AJ006589,AJ550940,JX182372,MK433266,MK450421,MK450426,MK450431,MK450433,MK686068,MK686069                                                                                                                                                                                                                                                                                                                                                                                                                                                                                                                                                                                                                                                                                                                                                                                                                                                                                                                                                                                                                                                                                                                                                                                                                                                                                                                                                                                                                                                                                                                                                                                                                                                                                                                                                                                                                                                                                                                                                                                                                                                                                                                                                                                                                                                                                                                                                                                                                                                                                                                                                                                                                                                                                                                                                                                                                                                                                                                                                                                                                                                                                                                                                                                                                                                                                                                                                                                                                                                                                                                                                                                                                                                                                                                                                                                                                                                                                                                                                                                                                                                                                                                                                                                                                                                                                                                                                                                                                                                                                                                                                                                                                                                                                                                                                                                                                                                                                                                                                                                                                                                                                                                                                                                                                                                                                                                                                                                                                                                                                                                                                                                                                                                                                                                                                                                                                                                                                                                                                                                                                                                                                                                                                                                                                                                                                                                                                                                                                                                                                                                                                                                                                                                                                                                                                                                                                                                                                                                                                                                                                                                                                                                                                                                                                                                                                                                                                                                                                                                                                                                                                                                                                                                                                                                                                                                                                                                                                                                                                                                                                                                                                                                                                                                                                                                                     |
| VC_375_0  | GQ379227,MK937595                                                                                                                                                                                                                                                                                                                                                                                                                                                                                                                                                                                                                                                                                                                                                                                                                                                                                                                                                                                                                                                                                                                                                                                                                                                                                                                                                                                                                                                                                                                                                                                                                                                                                                                                                                                                                                                                                                                                                                                                                                                                                                                                                                                                                                                                                                                                                                                                                                                                                                                                                                                                                                                                                                                                                                                                                                                                                                                                                                                                                                                                                                                                                                                                                                                                                                                                                                                                                                                                                                                                                                                                                                                                                                                                                                                                                                                                                                                                                                                                                                                                                                                                                                                                                                                                                                                                                                                                                                                                                                                                                                                                                                                                                                                                                                                                                                                                                                                                                                                                                                                                                                                                                                                                                                                                                                                                                                                                                                                                                                                                                                                                                                                                                                                                                                                                                                                                                                                                                                                                                                                                                                                                                                                                                                                                                                                                                                                                                                                                                                                                                                                                                                                                                                                                                                                                                                                                                                                                                                                                                                                                                                                                                                                                                                                                                                                                                                                                                                                                                                                                                                                                                                                                                                                                                                                                                                                                                                                                                                                                                                                                                                                                                                                                                                                                                                                                             |
| VC_376_0  | MG593800,MG593803,MH001457                                                                                                                                                                                                                                                                                                                                                                                                                                                                                                                                                                                                                                                                                                                                                                                                                                                                                                                                                                                                                                                                                                                                                                                                                                                                                                                                                                                                                                                                                                                                                                                                                                                                                                                                                                                                                                                                                                                                                                                                                                                                                                                                                                                                                                                                                                                                                                                                                                                                                                                                                                                                                                                                                                                                                                                                                                                                                                                                                                                                                                                                                                                                                                                                                                                                                                                                                                                                                                                                                                                                                                                                                                                                                                                                                                                                                                                                                                                                                                                                                                                                                                                                                                                                                                                                                                                                                                                                                                                                                                                                                                                                                                                                                                                                                                                                                                                                                                                                                                                                                                                                                                                                                                                                                                                                                                                                                                                                                                                                                                                                                                                                                                                                                                                                                                                                                                                                                                                                                                                                                                                                                                                                                                                                                                                                                                                                                                                                                                                                                                                                                                                                                                                                                                                                                                                                                                                                                                                                                                                                                                                                                                                                                                                                                                                                                                                                                                                                                                                                                                                                                                                                                                                                                                                                                                                                                                                                                                                                                                                                                                                                                                                                                                                                                                                                                                                                    |
| VC_377_0  | MT701593,MT701595,MT701596                                                                                                                                                                                                                                                                                                                                                                                                                                                                                                                                                                                                                                                                                                                                                                                                                                                                                                                                                                                                                                                                                                                                                                                                                                                                                                                                                                                                                                                                                                                                                                                                                                                                                                                                                                                                                                                                                                                                                                                                                                                                                                                                                                                                                                                                                                                                                                                                                                                                                                                                                                                                                                                                                                                                                                                                                                                                                                                                                                                                                                                                                                                                                                                                                                                                                                                                                                                                                                                                                                                                                                                                                                                                                                                                                                                                                                                                                                                                                                                                                                                                                                                                                                                                                                                                                                                                                                                                                                                                                                                                                                                                                                                                                                                                                                                                                                                                                                                                                                                                                                                                                                                                                                                                                                                                                                                                                                                                                                                                                                                                                                                                                                                                                                                                                                                                                                                                                                                                                                                                                                                                                                                                                                                                                                                                                                                                                                                                                                                                                                                                                                                                                                                                                                                                                                                                                                                                                                                                                                                                                                                                                                                                                                                                                                                                                                                                                                                                                                                                                                                                                                                                                                                                                                                                                                                                                                                                                                                                                                                                                                                                                                                                                                                                                                                                                                                                    |
| VC_378_0  | KR905068,KU848187,LC625742                                                                                                                                                                                                                                                                                                                                                                                                                                                                                                                                                                                                                                                                                                                                                                                                                                                                                                                                                                                                                                                                                                                                                                                                                                                                                                                                                                                                                                                                                                                                                                                                                                                                                                                                                                                                                                                                                                                                                                                                                                                                                                                                                                                                                                                                                                                                                                                                                                                                                                                                                                                                                                                                                                                                                                                                                                                                                                                                                                                                                                                                                                                                                                                                                                                                                                                                                                                                                                                                                                                                                                                                                                                                                                                                                                                                                                                                                                                                                                                                                                                                                                                                                                                                                                                                                                                                                                                                                                                                                                                                                                                                                                                                                                                                                                                                                                                                                                                                                                                                                                                                                                                                                                                                                                                                                                                                                                                                                                                                                                                                                                                                                                                                                                                                                                                                                                                                                                                                                                                                                                                                                                                                                                                                                                                                                                                                                                                                                                                                                                                                                                                                                                                                                                                                                                                                                                                                                                                                                                                                                                                                                                                                                                                                                                                                                                                                                                                                                                                                                                                                                                                                                                                                                                                                                                                                                                                                                                                                                                                                                                                                                                                                                                                                                                                                                                                                    |
| VC_379_0  | AJ242593,DQ003637,KJ094022,KP399678,MH341452,MZ361825,MZ361826,MZ361827,ON456151                                                                                                                                                                                                                                                                                                                                                                                                                                                                                                                                                                                                                                                                                                                                                                                                                                                                                                                                                                                                                                                                                                                                                                                                                                                                                                                                                                                                                                                                                                                                                                                                                                                                                                                                                                                                                                                                                                                                                                                                                                                                                                                                                                                                                                                                                                                                                                                                                                                                                                                                                                                                                                                                                                                                                                                                                                                                                                                                                                                                                                                                                                                                                                                                                                                                                                                                                                                                                                                                                                                                                                                                                                                                                                                                                                                                                                                                                                                                                                                                                                                                                                                                                                                                                                                                                                                                                                                                                                                                                                                                                                                                                                                                                                                                                                                                                                                                                                                                                                                                                                                                                                                                                                                                                                                                                                                                                                                                                                                                                                                                                                                                                                                                                                                                                                                                                                                                                                                                                                                                                                                                                                                                                                                                                                                                                                                                                                                                                                                                                                                                                                                                                                                                                                                                                                                                                                                                                                                                                                                                                                                                                                                                                                                                                                                                                                                                                                                                                                                                                                                                                                                                                                                                                                                                                                                                                                                                                                                                                                                                                                                                                                                                                                                                                                                                              |
| VC_38_0   | AJ312240,DQ003639,JX120799,KJ094023,MT500540                                                                                                                                                                                                                                                                                                                                                                                                                                                                                                                                                                                                                                                                                                                                                                                                                                                                                                                                                                                                                                                                                                                                                                                                                                                                                                                                                                                                                                                                                                                                                                                                                                                                                                                                                                                                                                                                                                                                                                                                                                                                                                                                                                                                                                                                                                                                                                                                                                                                                                                                                                                                                                                                                                                                                                                                                                                                                                                                                                                                                                                                                                                                                                                                                                                                                                                                                                                                                                                                                                                                                                                                                                                                                                                                                                                                                                                                                                                                                                                                                                                                                                                                                                                                                                                                                                                                                                                                                                                                                                                                                                                                                                                                                                                                                                                                                                                                                                                                                                                                                                                                                                                                                                                                                                                                                                                                                                                                                                                                                                                                                                                                                                                                                                                                                                                                                                                                                                                                                                                                                                                                                                                                                                                                                                                                                                                                                                                                                                                                                                                                                                                                                                                                                                                                                                                                                                                                                                                                                                                                                                                                                                                                                                                                                                                                                                                                                                                                                                                                                                                                                                                                                                                                                                                                                                                                                                                                                                                                                                                                                                                                                                                                                                                                                                                                                                                  |
| VC_380_0  | AB231700,KF356199,OP394178                                                                                                                                                                                                                                                                                                                                                                                                                                                                                                                                                                                                                                                                                                                                                                                                                                                                                                                                                                                                                                                                                                                                                                                                                                                                                                                                                                                                                                                                                                                                                                                                                                                                                                                                                                                                                                                                                                                                                                                                                                                                                                                                                                                                                                                                                                                                                                                                                                                                                                                                                                                                                                                                                                                                                                                                                                                                                                                                                                                                                                                                                                                                                                                                                                                                                                                                                                                                                                                                                                                                                                                                                                                                                                                                                                                                                                                                                                                                                                                                                                                                                                                                                                                                                                                                                                                                                                                                                                                                                                                                                                                                                                                                                                                                                                                                                                                                                                                                                                                                                                                                                                                                                                                                                                                                                                                                                                                                                                                                                                                                                                                                                                                                                                                                                                                                                                                                                                                                                                                                                                                                                                                                                                                                                                                                                                                                                                                                                                                                                                                                                                                                                                                                                                                                                                                                                                                                                                                                                                                                                                                                                                                                                                                                                                                                                                                                                                                                                                                                                                                                                                                                                                                                                                                                                                                                                                                                                                                                                                                                                                                                                                                                                                                                                                                                                                                                    |
| VC_381_0  | DQ003642,KP399677,MH341451                                                                                                                                                                                                                                                                                                                                                                                                                                                                                                                                                                                                                                                                                                                                                                                                                                                                                                                                                                                                                                                                                                                                                                                                                                                                                                                                                                                                                                                                                                                                                                                                                                                                                                                                                                                                                                                                                                                                                                                                                                                                                                                                                                                                                                                                                                                                                                                                                                                                                                                                                                                                                                                                                                                                                                                                                                                                                                                                                                                                                                                                                                                                                                                                                                                                                                                                                                                                                                                                                                                                                                                                                                                                                                                                                                                                                                                                                                                                                                                                                                                                                                                                                                                                                                                                                                                                                                                                                                                                                                                                                                                                                                                                                                                                                                                                                                                                                                                                                                                                                                                                                                                                                                                                                                                                                                                                                                                                                                                                                                                                                                                                                                                                                                                                                                                                                                                                                                                                                                                                                                                                                                                                                                                                                                                                                                                                                                                                                                                                                                                                                                                                                                                                                                                                                                                                                                                                                                                                                                                                                                                                                                                                                                                                                                                                                                                                                                                                                                                                                                                                                                                                                                                                                                                                                                                                                                                                                                                                                                                                                                                                                                                                                                                                                                                                                                                                    |
| VC_385_0  | GU327038,HQ141410                                                                                                                                                                                                                                                                                                                                                                                                                                                                                                                                                                                                                                                                                                                                                                                                                                                                                                                                                                                                                                                                                                                                                                                                                                                                                                                                                                                                                                                                                                                                                                                                                                                                                                                                                                                                                                                                                                                                                                                                                                                                                                                                                                                                                                                                                                                                                                                                                                                                                                                                                                                                                                                                                                                                                                                                                                                                                                                                                                                                                                                                                                                                                                                                                                                                                                                                                                                                                                                                                                                                                                                                                                                                                                                                                                                                                                                                                                                                                                                                                                                                                                                                                                                                                                                                                                                                                                                                                                                                                                                                                                                                                                                                                                                                                                                                                                                                                                                                                                                                                                                                                                                                                                                                                                                                                                                                                                                                                                                                                                                                                                                                                                                                                                                                                                                                                                                                                                                                                                                                                                                                                                                                                                                                                                                                                                                                                                                                                                                                                                                                                                                                                                                                                                                                                                                                                                                                                                                                                                                                                                                                                                                                                                                                                                                                                                                                                                                                                                                                                                                                                                                                                                                                                                                                                                                                                                                                                                                                                                                                                                                                                                                                                                                                                                                                                                                                             |
| VC_386_0  | AJ251805,AJ318471,EU547803,JX421753,KC960671,KM253764,KP313531,KP791805,KP791806,KP791807,KT008108,KU687347,KU687348,KX130726,KX452696,KX778611,LC730324,MP285616,MP285617,MP285620,MH717709,MK608335,MN013074,MN149904,MT419366,MT813142,MW296877,MW60072                                                                                                                                                                                                                                                                                                                                                                                                                                                                                                                                                                                                                                                                                                                                                                                                                                                                                                                                                                                                                                                                                                                                                                                                                                                                                                                                                                                                                                                                                                                                                                                                                                                                                                                                                                                                                                                                                                                                                                                                                                                                                                                                                                                                                                                                                                                                                                                                                                                                                                                                                                                                                                                                                                                                                                                                                                                                                                                                                                                                                                                                                                                                                                                                                                                                                                                                                                                                                                                                                                                                                                                                                                                                                                                                                                                                                                                                                                                                                                                                                                                                                                                                                                                                                                                                                                                                                                                                                                                                                                                                                                                                                                                                                                                                                                                                                                                                                                                                                                                                                                                                                                                                                                                                                                                                                                                                                                                                                                                                                                                                                                                                                                                                                                                                                                                                                                                                                                                                                                                                                                                                                                                                                                                                                                                                                                                                                                                                                                                                                                                                                                                                                                                                                                                                                                                                                                                                                                                                                                                                                                                                                                                                                                                                                                                                                                                                                                                                                                                                                                                                                                                                                                                                                                                                                                                                                                                                                                                                                                                                                                                                                                    |
| VC_387_0  | 2,MZ359670,MZ428229,OK149215,OL362281,OL362282,OL362283,OL691920,OL744209,OL744212,OL744217,OL800605,ON528720,ON528721,ON528722,ON528723,ON528724,ON950090,OP617747,OX335419,OX335420,OX335431,OX335434,OX335437                                                                                                                                                                                                                                                                                                                                                                                                                                                                                                                                                                                                                                                                                                                                                                                                                                                                                                                                                                                                                                                                                                                                                                                                                                                                                                                                                                                                                                                                                                                                                                                                                                                                                                                                                                                                                                                                                                                                                                                                                                                                                                                                                                                                                                                                                                                                                                                                                                                                                                                                                                                                                                                                                                                                                                                                                                                                                                                                                                                                                                                                                                                                                                                                                                                                                                                                                                                                                                                                                                                                                                                                                                                                                                                                                                                                                                                                                                                                                                                                                                                                                                                                                                                                                                                                                                                                                                                                                                                                                                                                                                                                                                                                                                                                                                                                                                                                                                                                                                                                                                                                                                                                                                                                                                                                                                                                                                                                                                                                                                                                                                                                                                                                                                                                                                                                                                                                                                                                                                                                                                                                                                                                                                                                                                                                                                                                                                                                                                                                                                                                                                                                                                                                                                                                                                                                                                                                                                                                                                                                                                                                                                                                                                                                                                                                                                                                                                                                                                                                                                                                                                                                                                                                                                                                                                                                                                                                                                                                                                                                                                                                                                                                              |
| VC_388_0  | AM183667,EU734170,EU734171,FJ194439,GQ468526,HQ333270,JQ965702,KF700371,KM366096,KP090453,KP090454,KY084243,LT960606,LT961836,LT961837,LT961838,LT961840,LT961841,LT961842,LT961843,LT961844,LT961845,LT961846,LT962379,LT962380,LT962475,LT962906,LT962907,MG471                                                                                                                                                                                                                                                                                                                                                                                                                                                                                                                                                                                                                                                                                                                                                                                                                                                                                                                                                                                                                                                                                                                                                                                                                                                                                                                                                                                                                                                                                                                                                                                                                                                                                                                                                                                                                                                                                                                                                                                                                                                                                                                                                                                                                                                                                                                                                                                                                                                                                                                                                                                                                                                                                                                                                                                                                                                                                                                                                                                                                                                                                                                                                                                                                                                                                                                                                                                                                                                                                                                                                                                                                                                                                                                                                                                                                                                                                                                                                                                                                                                                                                                                                                                                                                                                                                                                                                                                                                                                                                                                                                                                                                                                                                                                                                                                                                                                                                                                                                                                                                                                                                                                                                                                                                                                                                                                                                                                                                                                                                                                                                                                                                                                                                                                                                                                                                                                                                                                                                                                                                                                                                                                                                                                                                                                                                                                                                                                                                                                                                                                                                                                                                                                                                                                                                                                                                                                                                                                                                                                                                                                                                                                                                                                                                                                                                                                                                                                                                                                                                                                                                                                                                                                                                                                                                                                                                                                                                                                                                                                                                                                                             |
| VC_389_0  | 392,MH031343,MH809534,MK685668,MK907285,MN080711,MN252582,MT374859,MT515757,MT542512,MT625440,MW147603,MW367418,MW767996,MZ501055,MK663600,OL800603,OL856139,ON754979,ON922920                                                                                                                                                                                                                                                                                                                                                                                                                                                                                                                                                                                                                                                                                                                                                                                                                                                                                                                                                                                                                                                                                                                                                                                                                                                                                                                                                                                                                                                                                                                                                                                                                                                                                                                                                                                                                                                                                                                                                                                                                                                                                                                                                                                                                                                                                                                                                                                                                                                                                                                                                                                                                                                                                                                                                                                                                                                                                                                                                                                                                                                                                                                                                                                                                                                                                                                                                                                                                                                                                                                                                                                                                                                                                                                                                                                                                                                                                                                                                                                                                                                                                                                                                                                                                                                                                                                                                                                                                                                                                                                                                                                                                                                                                                                                                                                                                                                                                                                                                                                                                                                                                                                                                                                                                                                                                                                                                                                                                                                                                                                                                                                                                                                                                                                                                                                                                                                                                                                                                                                                                                                                                                                                                                                                                                                                                                                                                                                                                                                                                                                                                                                                                                                                                                                                                                                                                                                                                                                                                                                                                                                                                                                                                                                                                                                                                                                                                                                                                                                                                                                                                                                                                                                                                                                                                                                                                                                                                                                                                                                                                                                                                                                                                                                |
| VC_39_0   | HQ728265,MN450150,ON715521                                                                                                                                                                                                                                                                                                                                                                                                                                                                                                                                                                                                                                                                                                                                                                                                                                                                                                                                                                                                                                                                                                                                                                                                                                                                                                                                                                                                                                                                                                                                                                                                                                                                                                                                                                                                                                                                                                                                                                                                                                                                                                                                                                                                                                                                                                                                                                                                                                                                                                                                                                                                                                                                                                                                                                                                                                                                                                                                                                                                                                                                                                                                                                                                                                                                                                                                                                                                                                                                                                                                                                                                                                                                                                                                                                                                                                                                                                                                                                                                                                                                                                                                                                                                                                                                                                                                                                                                                                                                                                                                                                                                                                                                                                                                                                                                                                                                                                                                                                                                                                                                                                                                                                                                                                                                                                                                                                                                                                                                                                                                                                                                                                                                                                                                                                                                                                                                                                                                                                                                                                                                                                                                                                                                                                                                                                                                                                                                                                                                                                                                                                                                                                                                                                                                                                                                                                                                                                                                                                                                                                                                                                                                                                                                                                                                                                                                                                                                                                                                                                                                                                                                                                                                                                                                                                                                                                                                                                                                                                                                                                                                                                                                                                                                                                                                                                                                    |
| VC_390_0  | KT321314,ON602733,OX335378,OX335441                                                                                                                                                                                                                                                                                                                                                                                                                                                                                                                                                                                                                                                                                                                                                                                                                                                                                                                                                                                                                                                                                                                                                                                                                                                                                                                                                                                                                                                                                                                                                                                                                                                                                                                                                                                                                                                                                                                                                                                                                                                                                                                                                                                                                                                                                                                                                                                                                                                                                                                                                                                                                                                                                                                                                                                                                                                                                                                                                                                                                                                                                                                                                                                                                                                                                                                                                                                                                                                                                                                                                                                                                                                                                                                                                                                                                                                                                                                                                                                                                                                                                                                                                                                                                                                                                                                                                                                                                                                                                                                                                                                                                                                                                                                                                                                                                                                                                                                                                                                                                                                                                                                                                                                                                                                                                                                                                                                                                                                                                                                                                                                                                                                                                                                                                                                                                                                                                                                                                                                                                                                                                                                                                                                                                                                                                                                                                                                                                                                                                                                                                                                                                                                                                                                                                                                                                                                                                                                                                                                                                                                                                                                                                                                                                                                                                                                                                                                                                                                                                                                                                                                                                                                                                                                                                                                                                                                                                                                                                                                                                                                                                                                                                                                                                                                                                                                           |
| VC_392_0  | MF979561,MW001769,ON995367                                                                                                                                                                                                                                                                                                                                                                                                                                                                                                                                                                                                                                                                                                                                                                                                                                                                                                                                                                                                                                                                                                                                                                                                                                                                                                                                                                                                                                                                                                                                                                                                                                                                                                                                                                                                                                                                                                                                                                                                                                                                                                                                                                                                                                                                                                                                                                                                                                                                                                                                                                                                                                                                                                                                                                                                                                                                                                                                                                                                                                                                                                                                                                                                                                                                                                                                                                                                                                                                                                                                                                                                                                                                                                                                                                                                                                                                                                                                                                                                                                                                                                                                                                                                                                                                                                                                                                                                                                                                                                                                                                                                                                                                                                                                                                                                                                                                                                                                                                                                                                                                                                                                                                                                                                                                                                                                                                                                                                                                                                                                                                                                                                                                                                                                                                                                                                                                                                                                                                                                                                                                                                                                                                                                                                                                                                                                                                                                                                                                                                                                                                                                                                                                                                                                                                                                                                                                                                                                                                                                                                                                                                                                                                                                                                                                                                                                                                                                                                                                                                                                                                                                                                                                                                                                                                                                                                                                                                                                                                                                                                                                                                                                                                                                                                                                                                                                    |
| VC_393_0  | AF125520,AP000363,AP000422,AP004402,AP005153,AP005154,AP012529,AP012531,AP012532,AP012535,EU311208,HM208303,KJ909655,KP682372,KP682373,KP682375,KP682376,KP682377,KP682378,KP682379,KP682380,KP682382,KP682383,KP682384,KP682385,KP682386,KP682387,KP682388,KP682389,KP682390,KP682391,KP682392,KU238068,KU238069,KU238070                                                                                                                                                                                                                                                                                                                                                                                                                                                                                                                                                                                                                                                                                                                                                                                                                                                                                                                                                                                                                                                                                                                                                                                                                                                                                                                                                                                                                                                                                                                                                                                                                                                                                                                                                                                                                                                                                                                                                                                                                                                                                                                                                                                                                                                                                                                                                                                                                                                                                                                                                                                                                                                                                                                                                                                                                                                                                                                                                                                                                                                                                                                                                                                                                                                                                                                                                                                                                                                                                                                                                                                                                                                                                                                                                                                                                                                                                                                                                                                                                                                                                                                                                                                                                                                                                                                                                                                                                                                                                                                                                                                                                                                                                                                                                                                                                                                                                                                                                                                                                                                                                                                                                                                                                                                                                                                                                                                                                                                                                                                                                                                                                                                                                                                                                                                                                                                                                                                                                                                                                                                                                                                                                                                                                                                                                                                                                                                                                                                                                                                                                                                                                                                                                                                                                                                                                                                                                                                                                                                                                                                                                                                                                                                                                                                                                                                                                                                                                                                                                                                                                                                                                                                                                                                                                                                                                                                                                                                                                                                                                                    |
| VC_394_0  | 89,KP682390,KP682391,KP682392,KU238068,KU238069,KU238070                                                                                                                                                                                                                                                                                                                                                                                                                                                                                                                                                                                                                                                                                                                                                                                                                                                                                                                                                                                                                                                                                                                                                                                                                                                                                                                                                                                                                                                                                                                                                                                                                                                                                                                                                                                                                                                                                                                                                                                                                                                                                                                                                                                                                                                                                                                                                                                                                                                                                                                                                                                                                                                                                                                                                                                                                                                                                                                                                                                                                                                                                                                                                                                                                                                                                                                                                                                                                                                                                                                                                                                                                                                                                                                                                                                                                                                                                                                                                                                                                                                                                                                                                                                                                                                                                                                                                                                                                                                                                                                                                                                                                                                                                                                                                                                                                                                                                                                                                                                                                                                                                                                                                                                                                                                                                                                                                                                                                                                                                                                                                                                                                                                                                                                                                                                                                                                                                                                                                                                                                                                                                                                                                                                                                                                                                                                                                                                                                                                                                                                                                                                                                                                                                                                                                                                                                                                                                                                                                                                                                                                                                                                                                                                                                                                                                                                                                                                                                                                                                                                                                                                                                                                                                                                                                                                                                                                                                                                                                                                                                                                                                                                                                                                                                                                                                                      |
| VC_395_0  | EU652770,KX078568,MW358931,OK499982                                                                                                                                                                                                                                                                                                                                                                                                                                                                                                                                                                                                                                                                                                                                                                                                                                                                                                                                                                                                                                                                                                                                                                                                                                                                                                                                                                                                                                                                                                                                                                                                                                                                                                                                                                                                                                                                                                                                                                                                                                                                                                                                                                                                                                                                                                                                                                                                                                                                                                                                                                                                                                                                                                                                                                                                                                                                                                                                                                                                                                                                                                                                                                                                                                                                                                                                                                                                                                                                                                                                                                                                                                                                                                                                                                                                                                                                                                                                                                                                                                                                                                                                                                                                                                                                                                                                                                                                                                                                                                                                                                                                                                                                                                                                                                                                                                                                                                                                                                                                                                                                                                                                                                                                                                                                                                                                                                                                                                                                                                                                                                                                                                                                                                                                                                                                                                                                                                                                                                                                                                                                                                                                                                                                                                                                                                                                                                                                                                                                                                                                                                                                                                                                                                                                                                                                                                                                                                                                                                                                                                                                                                                                                                                                                                                                                                                                                                                                                                                                                                                                                                                                                                                                                                                                                                                                                                                                                                                                                                                                                                                                                                                                                                                                                                                                                                                           |
| VC_396_0  | AY247822,AY264774,AY264775,AY264776,AY264777,AY264778,EU734174,FR667955,GU071091,JQ957925,JQ965700,JQ965701,JQ965703,JX000007,JX872508,KM242061,KU279499,LC730325,LR745706,LR745707,LR745708,LR745709,LR745710,MC488277,MC832642,MC833025,MC966531,MH382198,MH717098,MH717099,MH779619,MK310182,MK542821,MN026740,MN098329,MN481365,MN481366,MN350293,MT543041,MT681669,MW074885,MW883060,MZ220766,MZ318361,MZ318362,MZ318363,MZ375233,MZ375234,MZ375235,MZ375236,MZ375237,MZ375238,MZ375239,MZ375240,MZ375241,MZ375242,MZ375243,MZ375244,MZ375245,MZ375246,MZ375247,MZ375248,MZ375249,MZ375250,MZ375251,MZ375252,MZ375253,MZ375254,MZ375255,MZ375256,MZ375257,MZ375258,MZ375259,MZ375260,MZ375261,MZ375262,MZ375263,MZ375264,MZ375265,MZ375266,MZ375267,MZ375268,MZ375269,MZ375270,MZ375271,MZ375272,MZ375273,MZ375274,MZ375275,MZ375276,MZ375277,MZ375278,MZ375279,MZ375280,MZ375281,MZ375282,MZ375283,MZ375284,MZ375285,MZ375286,MZ375287,MZ375288,MZ375289,MZ375290,MZ375291,MZ375292,MZ375293,MZ375294,MZ501078,MZ501079,MZ501080,MZ501081,MZ501082,MZ501083,MZ501084,MZ501085,MZ501086,MZ501087,MZ501088,MZ501089,MZ501090,MZ501091,MZ501092,MZ501093,MZ501094,MZ501095,MZ501096,MZ501097,MZ501098,MZ501099,MZ501100,MZ501101,MZ501102,MZ501103,MZ501104,MZ501105,MZ501106,MZ501107,MZ501108,MZ501109,MZ501110,MZ501111,MZ501112,MZ501113,MZ501114,MZ501115,MZ501116,MZ501117,MZ501118,MZ501119,MZ501120,MZ501121,MZ501122,MZ501123,MZ501124,MZ501125,MZ501126,MZ501127,MZ501128,MZ501129,MZ501130,MZ501131,MZ501132,MZ501133,MZ501134,MZ501135,MZ501136,MZ501137,MZ501138,MZ501139,MZ501140,MZ501141,MZ501142,MZ501143,MZ501144,MZ501145,MZ501146,MZ501147,MZ501148,MZ501149,MZ501150,MZ501151,MZ501152,MZ501153,MZ501154,MZ501155,MZ501156,MZ501157,MZ501158,MZ501159,MZ501160,MZ501161,MZ501162,MZ501163,MZ501164,MZ501165,MZ501166,MZ501167,MZ501168,MZ501169,MZ501170,MZ501171,MZ501172,MZ501173,MZ501174,MZ501175,MZ501176,MZ501177,MZ501178,MZ501179,MZ501180,MZ501181,MZ501182,MZ501183,MZ501184,MZ501185,MZ501186,MZ501187,MZ501188,MZ501189,MZ501190,MZ501191,MZ501192,MZ501193,MZ501194,MZ501195,MZ501196,MZ501197,MZ501198,MZ501199,MZ501200,MZ501201,MZ501202,MZ501203,MZ501204,MZ501205,MZ501206,MZ501207,MZ501208,MZ501209,MZ501210,MZ501211,MZ501212,MZ501213,MZ501214,MZ501215,MZ501216,MZ501217,MZ501218,MZ501219,MZ501220,MZ501221,MZ501222,MZ501223,MZ501224,MZ501225,MZ501226,MZ501227,MZ501228,MZ501229,MZ501230,MZ501231,MZ501232,MZ501233,MZ501234,MZ501235,MZ501236,MZ501237,MZ501238,MZ501239,MZ501240,MZ501241,MZ501242,MZ501243,MZ501244,MZ501245,MZ501246,MZ501247,MZ501248,MZ501249,MZ501250,MZ501251,MZ501252,MZ501253,MZ501254,MZ501255,MZ501256,MZ501257,MZ501258,MZ501259,MZ501260,MZ501261,MZ501262,MZ501263,MZ501264,MZ501265,MZ501266,MZ501267,MZ501268,MZ501269,MZ501270,MZ501271,MZ501272,MZ501273,MZ501274,MZ501275,MZ501276,MZ501277,MZ501278,MZ501279,MZ501280,MZ501281,MZ501282,MZ501283,MZ501284,MZ501285,MZ501286,MZ501287,MZ501288,MZ501289,MZ501290,MZ501291,MZ501292,MZ501293,MZ501294,MZ501295,MZ501296,MZ501297,MZ501298,MZ501299,MZ501300,MZ501301,MZ501302,MZ501303,MZ501304,MZ501305,MZ501306,MZ501307,MZ501308,MZ501309,MZ501310,MZ501311,MZ501312,MZ501313,MZ501314,MZ501315,MZ501316,MZ501317,MZ501318,MZ501319,MZ501320,MZ501321,MZ501322,MZ501323,MZ501324,MZ501325,MZ501326,MZ501327,MZ501328,MZ501329,MZ501330,MZ501331,MZ501332,MZ501333,MZ501334,MZ501335,MZ501336,MZ501337,MZ501338,MZ501339,MZ501340,MZ501341,MZ501342,MZ501343,MZ501344,MZ501345,MZ501346,MZ501347,MZ501348,MZ501349,MZ501350,MZ501351,MZ501352,MZ501353,MZ501354,MZ501355,MZ501356,MZ501357,MZ501358,MZ501359,MZ501360,MZ501361,MZ501362,MZ501363,MZ501364,MZ501365,MZ501366,MZ501367,MZ501368,MZ501369,MZ501370,MZ501371,MZ501372,MZ501373,MZ501374,MZ501375,MZ501376,MZ501377,MZ501378,MZ501379,MZ501380,MZ501381,MZ501382,MZ501383,MZ501384,MZ501385,MZ501386,MZ501387,MZ501388,MZ501389,MZ501390,MZ501391,MZ501392,MZ501393,MZ501394,MZ501395,MZ501396,MZ501397,MZ501398,MZ501399,MZ501400,MZ501401,MZ501402,MZ501403,MZ501404,MZ501405,MZ501406,MZ501407,MZ501408,MZ501409,MZ501410,MZ501411,MZ501412,MZ501413,MZ501414,MZ501415,MZ501416,MZ501417,MZ501418,MZ501419,MZ501420,MZ501421,MZ501422,MZ501423,MZ501424,MZ501425,MZ501426,MZ501427,MZ501428,MZ501429,MZ501430,MZ501431,MZ501432,MZ501433,MZ501434,MZ501435,MZ501436,MZ501437,MZ501438,MZ501439,MZ501440,MZ501441,MZ501442,MZ501443,MZ501444,MZ501445,MZ501446,MZ501447,MZ501448,MZ501449,MZ501450,MZ501451,MZ501452,MZ501453,MZ501454,MZ501455,MZ501456,MZ501457,MZ501458,MZ501459,MZ501460,MZ501461,MZ501462,MZ501463,MZ501464,MZ501465,MZ501466,MZ501467,MZ501468,MZ501469,MZ501470,MZ501471,MZ501472,MZ501473,MZ501474,MZ501475,MZ501476,MZ501477,MZ501478,MZ501479,MZ501480,MZ501481,MZ501482,MZ501483,MZ501484,MZ501485,MZ501486,MZ501487,MZ501488,MZ501489,MZ501490,MZ501491,MZ501492,MZ501493,MZ501494,MZ501495,MZ501496,MZ501497,MZ501498,MZ501499,MZ501500,MZ501501,MZ501502,MZ501503,MZ501504,MZ501505,MZ501506,MZ501507,MZ501508,MZ501509,MZ501510,MZ501511,MZ501512,MZ501513,MZ501514,MZ501515,MZ501516,MZ501517,MZ501518,MZ501519,MZ501520,MZ501521,MZ501522,MZ501523,MZ501524,MZ501525,MZ501526,MZ501527,MZ501528,MZ501529,MZ501530,MZ501531,MZ501532,MZ501533,MZ501534,MZ501535,MZ501536,MZ501537,MZ501538,MZ501539,MZ501540,MZ501541,MZ501542,MZ501543,MZ501544,MZ501545,MZ501546,MZ501547,MZ501548,MZ501549,MZ501550,MZ501551,MZ501552,MZ501553,MZ501554,MZ501555,MZ501556,MZ501557,MZ501558,MZ501559,MZ501560,MZ501561,MZ501562,MZ501563,MZ501564,MZ501565,MZ501566,MZ501567,MZ501568,MZ501569,MZ501570,MZ501571,MZ501572,MZ501573,MZ501574,MZ501575,MZ501576,MZ501577,MZ501578,MZ501579,MZ501580,MZ501581,MZ501582,MZ501583,MZ501584,MZ501585,MZ501586,MZ501587,MZ501588,MZ501589,MZ501590,MZ501591,MZ501592,MZ501593,MZ501594,MZ501595,MZ501596,MZ501597,MZ501598,MZ501599,MZ501600,MZ501601,MZ501602,MZ501603,MZ501604,MZ501605,MZ501606,MZ501607,MZ501608,MZ501609,MZ501610,MZ501611,MZ501612,MZ501613,MZ501614,MZ501615,MZ501616,MZ501617,MZ501618,MZ501619,MZ501620,MZ501621,MZ501622,MZ501623,MZ501624,MZ501625,MZ501626,MZ501627,MZ501628,MZ501629,MZ501630,MZ501631,MZ501632,MZ501633,MZ501634,MZ501635,MZ501636,MZ501637,MZ501638,MZ501639,MZ501640,MZ501641,MZ501642,MZ501643,MZ501644,MZ501645,MZ501646,MZ501647,MZ501648,MZ501649,MZ501650,MZ501651,MZ501652,MZ501653,MZ501654,MZ501655,MZ501656,MZ501657,MZ501658,MZ501659,MZ501660,MZ501661,MZ501662,MZ501663,MZ501664,MZ501665,MZ501666,MZ501667,MZ501668,MZ501669,MZ501670,MZ501671,MZ501672,MZ501673,MZ501674,MZ501675,MZ501676,MZ501677,MZ501678,MZ501679,MZ501680,MZ501681,MZ501682,MZ501683,MZ501684,MZ501685,MZ501686,MZ501687,MZ501688,MZ501689,MZ501690,MZ501691,MZ501692,MZ501693,MZ501694,MZ501695,MZ501696,MZ501697,MZ501698,MZ501699,MZ501700,MZ501701,MZ501702,MZ501703,MZ501704,MZ501705,MZ501706,MZ501707,MZ501708,MZ501709,MZ501710,MZ501711,MZ501712,MZ501713,MZ501714,MZ501715,MZ501716,MZ501717,MZ501718,MZ501719,MZ501720,MZ501721,MZ501722,MZ501723,MZ501724,MZ501725,MZ501726,MZ501727,MZ501728,MZ501729,MZ501730,MZ501731,MZ501732,MZ501733,MZ501734,MZ501735,MZ501736,MZ501737,MZ501738,MZ501739,MZ501740,MZ501741,MZ501742,MZ501743,MZ501744,MZ501745,MZ501746,MZ501747,MZ501748,MZ501749,MZ501750,MZ501751,MZ501752,MZ501753,MZ501754,MZ501755,MZ501756,MZ501757,MZ501758,MZ501759,MZ501760,MZ501761,MZ501762,MZ501763,MZ501764,MZ501765,MZ501766,MZ501767,MZ501768,MZ501769,MZ501770,MZ501771,MZ501772,MZ501773,MZ501774,MZ501775,MZ501776,MZ501777,MZ501778,MZ501779,MZ501780,MZ501781,MZ501782,MZ501783,MZ501784,MZ501785,MZ501786,MZ501787,MZ501788,MZ501789,MZ501790,MZ501791,MZ501792,MZ501793,MZ501794,MZ501795,MZ501796,MZ501797,MZ501798,MZ501799,MZ501800,MZ501801,MZ501802,MZ501803,MZ501804,MZ501805,MZ501806,MZ501807,MZ501808,MZ501809,MZ501810,MZ501811,MZ501812,MZ501813,MZ501814,MZ501815,MZ501816,MZ501817,MZ501818,MZ501819,MZ501820,MZ501821,MZ501822,MZ501823,MZ501824,MZ501825,MZ501826,MZ501827,MZ501828,MZ501829,MZ501830,MZ501831,MZ501832,MZ501833,MZ501834,MZ501835,MZ501836,MZ501837,MZ501838,MZ501839,MZ501840,MZ501841,MZ501842,MZ501843,MZ501844,MZ501845,MZ501846,MZ501847,MZ501848,MZ501849,MZ501850,MZ501851,MZ501852,MZ501853,MZ501854,MZ501855,MZ501856,MZ501857,MZ501858,MZ501859,MZ501860,MZ501861,M |



VC\_407\_0 AJ278322, MG324353, MG324354  
VC\_408\_0 KY566218, KY613597, KY624610, KY624611, KY624612, KY624613, KY624614, KY624615, KY624616  
VC\_409\_0 KY203335, KY250482, MW582634  
VC\_41\_0 AJ556162, JQ347801, LC727891, LC727892, LC727893, LC727894, LC727895, LC727896, LC727897, LC727898, LC727899, LC727900, LC727901, LC727902, ON470597, ON470625  
VC\_41\_1 AP012530, AP012538, AP012539, AP012540, FJ184280, FJ188381, FM180578, LC645408, LC645425, LC645426  
VC\_410\_0 MG198783, MG198784, MH271305, MH271318, MT521997, MZ681507, ON456352  
VC\_411\_0 LC644972, LC644974, MT843275  
VC\_412\_0 AJ302074, DQ113772, HF563658, JX879087, KC413988, KT337358, KT337364, KT388093, KX550065, KY065455, KY065479, KY065487, KY065490, KY065491, KY065492, KY065493, KY065501, KY065502, KY349816, MK448671, MK448708, MK448714, MK448831, MK448834, MK448861, MK448874, MK448875, MK448876, MK448877, K  
VC\_413\_0 Y065478, Y065480, Y065486, Y065488, Y065496, Y065497, Y065500, Y065505, OK173051  
VC\_414\_0 KY065449  
FR671405, FR671406, FR671407, FR671410, FR671411, HG799490, HG799496, HG799497, KJ417497, KJ173337, KT337339, KT337340, KT337341, KT337352, KT337354, KT337355, KT337356, KT337359, KT337362, KY065450, KY065451, KY065452, KY065456, KY065472, KY065473, KY065474, KY065475, KY065476, KY065477, K  
VC\_415\_0 KY065449  
VC\_416\_0 MK448686, MK448762, MK448788, MK448791, MK448793, MK448862, MK448949, MK448951, MK448954, MK448958, MK448959, MK448960, MK448965, MK448977  
VC\_419\_0 MK448680, MK448684, MK448698, MK448769, MK448895  
VC\_42\_0 AP012534, HE664024, HG792102, HG792103, HG792104, HG792105, HG803182, HG803183, HG803184, HG803185, HQ424691, JQ011318, KF971864, KP682371, KP682374, KR781488, KU298437, KY914478, LC645409, LC645410, LC645411, LC645412, LC645413, LC645414, LC645415, LC645416, LC645417, LC645418, L  
VC\_422\_0 C645419, LC645420, LC645421, LC645422, LC645423, LC645424, LC645427, LC645438, LC645442, LC645443, LC645444, LC645445, LC645446, LC645447, LC645448, LC645449, LC645450, LC645451, LC727903, MG710528, MN067333  
VC\_423\_0 MF034659, MF166859, MT902335, MZ995503, MZ995506  
VC\_424\_0 AJ505558, AM265638, AM910651, EU056923, EU236438, FN263372, JQ307386, JX501340, JX997978, KC969441, KM067278, KR054031, KU743887, KX711710, KY618819, LC727700, LN610574, LN610580, MH107770, MH979674, MN553585, MN553587, MN553588, MN553589, MN602045, MN615698, MN615699, MN6926  
VC\_426\_0 72, MN871455, MN871483, MN901924, MW117144, MW406975, MW406976, MZ553931, MZ687409, OK539824, OL754589, OL802210, ON857926, ON857928, ON857933, ON857935, OP292288, OP556577  
VC\_426\_1 AJ536073, AY257527, AY701338, CP013282, EU408779, MZ089978, MZ089979  
VC\_428\_0 AJ560763, QG866233  
CP013974, MG575421, MZ424863  
VC\_43\_0 KM366099, KX826077, KY608966, MF740800, MH181876, MK568062, MK673511, MK770411, MK770413, MN339740, MT012730, MT074434, MT074435, MT074436, MT074437, MT074438, MT074439, MT074441, MT074442, MT074443, MT074444, MT074445, MT074446, MT663719, MT764207, MT768059, MW413353, M  
VC\_431\_0 W508890, MW602648, MZ127825, OM313460, OM313461, OPI32241  
VC\_432\_0 EU078592, JQ086376, JQ182735, KT232076, LAMCG, LC730321, LR595850, LR595859, LR595860, LR595861, LR595863, LR595864, LR595865, LR595866, LR597635, LR597636, LR597639, LR597643, LR597644, LR597648, LR597650, LR597651, LR597652, LR597653, MF374379, MH547045, OL657226, OL657227, OL65  
VC\_432\_1 MK448692, MK448702, MK448711, MK448716, MK448724, MK448730, MK448744, MK448745, MK448923  
VC\_432\_10 MN695334, MN695335  
VC\_432\_11 MH412654  
VC\_432\_12 GU071098, HQ317391  
VC\_432\_13 HQ633071  
VC\_432\_14 MW015081  
VC\_432\_15 MK799832  
VC\_432\_16 MN018232  
VC\_432\_2 KU686204, KU686205, KU686206  
VC\_432\_3 MH629685  
VC\_432\_4 GU071095  
VC\_432\_5 MF351863  
VC\_432\_6 MT408532  
VC\_432\_7 MK867354  
VC\_432\_8 MH319749  
VC\_432\_9 MH319754  
VC\_433\_0 KM359505  
VC\_433\_1 AY939844, GU071092, HQ632825  
VC\_433\_10 HQ634177, KU686192, KU686193, KU686194, KU686195, KU686196  
VC\_433\_2 KJ019054, KJ019069, KJ019082, KJ019089, KJ019094, KJ019156, KU686200, KU686201, KU686202  
VC\_433\_3 KU686211  
VC\_433\_4 KFI56338  
VC\_433\_5 KU686197, KU686198, KU686199  
VC\_433\_6 GU071105, KU594607, KX349291, KX349292, KX349293, KX349294, KX349295, KX349296, KX349297  
VC\_433\_7 AJ630128, LN828717  
VC\_433\_8 KU594606  
VC\_433\_9 MW147367  
VC\_433\_10 FM207411  
VC\_435\_0 MW117966  
VC\_435\_1 MT162466, MT162467  
VC\_436\_0 MK016664  
VC\_437\_0 MZ577095, MZ577096, MZ577097, MZ577098  
VC\_438\_0 KF381361, KR052480, KR052481, KR052482  
VC\_439\_0 MH319720, MH319733, MH319742, MH319753, MH319758, MH327487  
VC\_440\_0 MH319750, MH319759  
VC\_442\_0 AJ635161, AY722806, MN876845, MT047590  
VC\_442\_1 MK838116, MN102098, MN131137, MN159079  
VC\_442\_2 MN642089, ON287370, ON287375  
VC\_442\_3 JN627160, MK689364, MZ348422, MZ501267  
VC\_442\_4 MN032614, MN453779, OL964756  
VC\_443\_0 MK774614, OM810292  
VC\_443\_1 MH791414, MW272540  
VC\_443\_2 GU459069, KY290955  
VC\_444\_0 JX123262, MF448340, MF498773, MF498775, MH791398, MH791404, MN871441, MN871442, MT713136, OM339718  
VC\_445\_0 AJ783769, JQ287645  
VC\_445\_1 MT732443, MT732444  
VC\_446\_0 KC821607, KC821618  
VC\_447\_0 HG322870, KP238129, KP282677, KP282678  
AJ888457, KX607101, KX607102



VC\_448\_0 KU878088,LC680884,MF360957,MW749003  
VC\_448\_1 KT895374  
VC\_449\_0 LC680885,MN091626,MW218148,MW248466,MW349128,MW349129,MZ779063  
VC\_45\_0 AJ298298,AY055382,KC736978,KC814930,KU927493,MK733259,MK733260,MK733261,MZ501270,ON470584,ON470603,SFU82619  
VC\_450\_0 AM076770,MN617773,MT366932,MT366933,MT366934,MT366935,MT366936,MT366937,MT366938,MT366939,MT366940,MT366941,MT366942,MT366943,MT366944  
AM084414,DQ1111067,EU734172,HG813241,HG818823,HG818824,KC109329,KJ748011,KT990215,KU687349,KU687350,KU687351,KX669227,KX689784,KY295894,KY962008,LT594300,MF630921,MG845865,MH400309,MH464253,MH491167,MK033136,MK301532,MK610268,MK903277,MK903279,MK903281,MN067430,MN218775,MN414250,MN510331,MN518893,MN518894,MN715150,MN812686,MT350292,MT446393,MT446394,MT496969,MT682707,MT808983,MT862763,MW258709,MW345254,MW416012,MW748991,MW876471,MZ223858,MZ234009,MZ234011,MZ234021,MZ234022,MZ234023,MZ234024,MZ234044,MZ234045,MZ234046,MZ234047,MZ311861,MZ311862,MZ398247,MZ648215,MZ726794,MZ923531,OK210074,OL362275,OL362276,OL539729,OL773676,OL773677,OM256482,OM355495,OM457002,OM867676,OM908436,OM937123,ON528733,ON548433,ON637250  
VC\_452\_0 AM084415,AY288927,AY370673,AY370674,GU595417,JN896844,JQ837901,KM366097,KM370384,KM819695,KM819696,KP890822,KU946962,KX279892,KY295891,KY295892,KY295893,KY295897,KY295899,KY435490,KY744566,LC730323,MG004687,MG251390,MG775042,MH729818,MK373771,MK373773,MK380014,MN384978,MT496971,MT680615,MW394389,MZ031013,MZ234012,MZ234019,MZ234020,MZ234032,MZ234049,MZ234050,MZ398244,MZ573924,MZ747518,MZ997839,MZ997840,MZ997841,OK625527,OL362272,OL362273,OL744215,OL744218,ON148527,ON185580,ON210144,ON210145,ON461912,ON526839,ON602763,ON602764,ON602765,OP018999,OP038547,OP079918,OP413828,OP413830,OX335382  
VC\_453\_0 EF160123,FQ482084,FQ482086,MG736918,OK570184,OM486945  
VC\_455\_0 DQ121662,JF770475,JQ182736,KC333879,KC579452,KF771236,KF771237,KF771238,KF771239,KJ668713,KT825490,MF158039,MF158042,MW286156,OL539447,OL539451,OL539453,OL539467  
VC\_456\_0 AM156909,JN986845,KX130960,KY398841,MG050172,MG065688,MK372342,MK373793,MK907226,MK907227,MK907228,MK907229,MK907230,MK907231,MK907232,MK907233,MK907234,MK907235,MK907240,MK907241,MK907242,MK907243,MK907244,MK907245,MK907246,MK907247,MK907248,MK907249,MK907250,MK907251,MK907252,MK907253,MK907254,MK907255,MK907256,MK907257,MK907258,MK907259,MK907260,MK907261,MK907262,MK907263,MK907264,MK907265,MK907266,MK907272,MK907273,MK907274,MK907275,MK907276,MN164484,MN840485,MT511058,MT682706,MW057918,MZ501051,MZ501080,MZ501087,OM258170,ON081052,OP087522,OP251154  
VC\_458\_0 MH059632,MH807810,MH807813,MH807815,MH807817  
VC\_459\_0 KC292023,MG550112,MZ334526  
VC\_46\_0 KF766125,KJ603229  
VC\_460\_0 JF974294,JF974312,MK327140,MT682064,MW119258,MW722082,MZ318367,MZ440881,MZ836210,OL362277,OL617041,ON602730,ON602737,ON602738,ON602744,ON602759,ON602760,OP373729,OP481875  
JF974294,JF974312,MK327140,MT682064,MW119258,MW722082,MZ318367,MZ440881,MZ836210,OL362277,OL617041,ON602730,ON602737,ON602738,ON602744,ON602759,ON602760,OP373729,OP481875  
VC\_461\_0 AM491472,KX017520,KX523699,KY860935,MF158038,MH023293,MH321493,MH424446,MH717097,MH791402,MH791410,MH791412,MK112901,MK599416,MK759854,MK947460,MN692673,MN737551,MN871490,MN871503,MT680660,MW427215,MW477799,MZ375232,MZ375295,MZ375296,MZ375297,MZ375298,MZ375299,MZ375300,MZ375301,MZ375302,MZ375303,MZ375304,MZ375305,MZ375306,MZ375307,MZ375308,MZ375309,MZ375310,MZ375311,MZ375312,MZ375313,MZ375314,MZ375315,MZ375316,MZ375317,MZ375318,MZ375319,MZ375320,MZ375321,MZ375322,MZ375323,MZ375324,MZ375325,MZ375326,MZ375327,MZ375328,MZ375329,MZ375330,MZ375331,MZ375332,MZ375333,MZ375334,MZ375335,MZ375336,MZ375337,MZ375338,MZ375339,MZ375340,MZ375341,MZ375342,MZ375343,MZ375344,MZ375345,MZ375346,MZ375347,MZ375348,MZ375349,MZ375350,MZ375351,MZ375352,MZ375353,MZ375354,MZ375355,MZ375356,MZ375357,MZ375358,MZ375359,MZ375360,MZ375361,MZ375362,MZ375363,MZ375364,MZ375365,MZ375366,MZ375367,MZ375368,MZ375369,MZ375370,MZ375371,MZ375372,MZ375373,MZ375374,MZ375375,MZ375376,MZ375377,MZ375378,MZ375379,MZ375380,MZ375381,MZ375382,MZ375383,MZ375384,MZ375385,MZ375386,MZ375387,MZ375388,MZ375389,MZ375390,MZ375391,MZ375392,MZ375393,MZ375394,MZ375395,MZ375396,MZ375397,MZ375398,MZ375399,MZ375400,MZ375401,MZ375402,MZ375403,MZ375404,MZ375405,MZ375406,MZ375407,MZ375408,MZ375409,MZ375410,MZ375411,MZ375412,MZ375413,MZ375414,MZ375415,MZ375416,MZ375417,MZ375418,MZ375419,MZ375420,MZ375421,MZ375422,MZ375423,MZ375424,MZ375425,MZ375426,MZ375427,MZ375428,MZ375429,MZ375430,MZ375431,MZ375432,MZ375433,MZ375434,MZ375435,MZ375436,MZ375437,MZ375438,MZ375439,MZ375440,MZ375441,MZ375442,MZ375443,MZ375444,MZ375445,MZ375446,MZ375447,MZ375448,MZ375449,MZ375450,MZ375451,MZ375452,MZ375453,MZ375454,MZ375455,MZ375456,MZ375457,MZ375458,MZ375459,MZ375460,MZ375461,MZ375462,MZ375463,MZ375464,MZ375465,MZ375466,MZ375467,MZ375468,MZ375469,MZ375470,MZ375471,MZ375472,MZ375473,MZ375474,MZ375475,MZ375476,MZ375477,MZ375478,MZ375479,MZ375480,MZ375481,MZ375482,MZ375483,MZ375484,MZ375485,MZ375486,MZ375487,MZ375488,MZ375489,MZ375490,MZ375491,MZ375492,MZ375493,MZ375494,MZ375495,MZ375496,MZ375497,MZ375498,MZ375499,MZ375500,MZ375501,MZ375502,MZ375503,MZ375504,MZ375505,MZ375506,MZ375507,MZ375508,MZ375509,MZ375510,MZ375511,MZ375512,MZ375513,MZ375514,MZ375515,MZ375516,MZ375517,MZ375518,MZ375519,MZ375520,MZ375521,MZ375522,MZ375523,MZ375524,MZ375525,MZ375526,MZ375527,MZ375528,MZ375529,MZ375530,MZ375531,MZ375532,MZ375533,MZ375534,MZ375535,MZ375536,MZ375537,MZ375538,MZ375539,MZ375540,MZ375541,MZ375542,MZ375543,MZ375544,MZ375545,MZ375546,MZ375547,MZ375548,MZ375549,MZ375550,MZ375551,MZ375552,MZ375553,MZ375554,MZ375555,MZ375556,MZ375557,MZ375558,MZ375559,MZ375560,MZ375561,MZ375562,MZ375563,MZ375564,MZ375565,MZ375566,MZ375567,MZ375568,MZ375569,MZ375570,MZ375571,MZ375572,MZ375573,MZ375574,MZ375575,MZ375576,MZ375577,MZ375578,MZ375579,MZ375580,MZ375581,MZ375582,MZ375583,MZ375584,MZ375585,MZ375586,MZ375587,MZ375588,MZ375589,MZ375590,MZ375591,MZ375592,MZ375593,MZ375594,MZ375595,MZ375596,MZ375597,MZ375598,MZ375599,MZ375600,MZ375601,MZ375602,MZ375603,MZ375604,MZ375605,MZ375606,MZ375607,MZ375608,MZ375609,MZ375610,MZ375611,MZ375612,MZ375613,MZ375614,MZ375615,MZ375616,MZ375617,MZ375618,MZ375619,MZ375620,MZ375621,MZ375622,MZ375623,MZ375624,MZ375625,MZ375626,MZ375627,MZ375628,MZ375629,MZ375630,MZ375631,MZ375632,MZ375633,MZ375634,MZ375635,MZ375636,MZ375637,MZ375638,MZ375639,MZ375640,MZ375641,MZ375642,MZ375643,MZ375644,MZ375645,MZ375646,MZ375647,MZ375648,MZ375649,MZ375650,MZ375651,MZ375652,MZ375653,MZ375654,MZ375655,MZ375656,MZ375657,MZ375658,MZ375659,MZ375660,MZ375661,MZ375662,MZ375663,MZ375664,MZ375665,MZ375666,MZ375667,MZ375668,MZ375669,MZ375670,MZ375671,MZ375672,MZ375673,MZ375674,MZ375675,MZ375676,MZ375677,MZ375678,MZ375679,MZ375680,MZ375681,MZ375682,MZ375683,MZ375684,MZ375685,MZ375686,MZ375687,MZ375688,MZ375689,MZ375690,MZ375691,MZ375692,MZ375693,MZ375694,MZ375695,MZ375696,MZ375697,MZ375698,MZ375699,MZ375700,MZ375701,MZ375702,MZ375703,MZ375704,MZ375705,MZ375706,MZ375707,MZ375708,MZ375709,MZ375710,MZ375711,MZ375712,MZ375713,MZ375714,MZ375715,MZ375716,MZ375717,MZ375718,MZ375719,MZ375720,MZ375721,MZ375722,MZ375723,MZ375724,MZ375725,MZ375726,MZ375727,MZ375728,MZ375729,MZ375730,MZ375731,MZ375732,MZ375733,MZ375734,MZ375735,MZ375736,MZ375737,MZ375738,MZ375739,MZ375740,MZ375741,MZ375742,MZ375743,MZ375744,MZ375745,MZ375746,MZ375747,MZ375748,MZ375749,MZ375750,MZ375751,MZ375752,MZ375753,MZ375754,MZ375755,MZ375756,MZ375757,MZ375758,MZ375759,MZ375760,MZ375761,MZ375762,MZ375763,MZ375764,MZ375765,MZ375766,MZ375767,MZ375768,MZ375769,MZ375770,MZ375771,MZ375772,MZ375773,MZ375774,MZ375775,MZ375776,MZ375777,MZ375778,MZ375779,MZ375780,MZ375781,MZ375782,MZ375783,MZ375784,MZ375785,MZ375786,MZ375787,MZ375788,MZ375789,MZ375790,MZ375791,MZ375792,MZ375793,MZ375794,MZ375795,MZ375796,MZ375797,MZ375798,MZ375799,MZ375800,MZ375801,MZ375802,MZ375803,MZ375804,MZ375805,MZ375806,MZ375807,MZ375808,MZ375809,MZ375810,MZ375811,MZ375812,MZ375813,MZ375814,MZ375815,MZ375816,MZ375817,MZ375818,MZ375819,MZ375820,MZ375821,MZ375822,MZ375823,MZ375824,MZ375825,MZ375826,MZ375827,MZ375828,MZ375829,MZ375830,MZ375831,MZ375832,MZ375833,MZ375834,MZ375835,MZ375836,MZ375837,MZ375838,MZ375839,MZ375840,MZ375841,MZ375842,MZ375843,MZ375844,MZ375845,MZ375846,MZ375847,MZ375848,MZ375849,MZ375850,MZ375851,MZ375852,MZ375853,MZ375854,MZ375855,MZ375856,MZ375857,MZ375858,MZ375859,MZ375860,MZ375861,MZ375862,MZ375863,MZ375864,MZ375865,MZ375866,MZ375867,MZ375868,MZ375869,MZ375870,MZ375871,MZ375872,MZ375873,MZ375874,MZ375875,MZ375876,MZ375877,MZ375878,MZ375879,MZ375880,MZ375881,MZ375882,MZ375883,MZ375884,MZ375885,MZ375886,MZ375887,MZ375888,MZ375889,MZ375890,MZ375891,MZ375892,MZ375893,MZ375894,MZ375895,MZ375896,MZ375897,MZ375898,MZ375899,MZ375900,MZ375901,MZ375902,MZ375903,MZ375904,MZ375905,MZ375906,MZ375907,MZ375908,MZ375909,MZ375910,MZ375911,MZ375912,MZ375913,MZ375914,MZ375915,MZ375916,MZ375917,MZ375918,MZ375919,MZ375920,MZ375921,MZ375922,MZ375923,MZ375924,MZ375925,MZ375926,MZ375927,MZ375928,MZ375929,MZ375930,MZ375931,MZ375932,MZ375933,MZ375934,MZ375935,MZ375936,MZ375937,MZ375938,MZ375939,MZ375940,MZ375941,MZ375942,MZ375943,MZ375944,MZ375945,MZ375946,MZ375947,MZ375948,MZ375949,MZ375950,MZ375951,MZ375952,MZ375953,MZ375954,MZ375955,MZ375956,MZ375957,MZ375958,MZ375959,MZ375960,MZ375961,MZ375962,MZ375963,MZ375964,MZ375965,MZ375966,MZ375967,MZ375968,MZ375969,MZ375970,MZ375971,MZ375972,MZ375973,MZ375974,MZ375975,MZ375976,MZ375977,MZ375978,MZ375979,MZ375980,MZ375981,MZ375982,MZ375983,MZ375984,MZ375985,MZ375986,MZ375987,MZ375988,MZ375989,MZ375990,MZ375991,MZ375992,MZ375993,MZ375994,MZ375995,MZ375996,MZ375997,MZ375998,MZ375999,MZ380000,MZ380001,MZ380002,MZ380003,MZ380004,MZ380005,MZ380006,MZ380007,MZ380008,MZ380009,MZ380010,MZ380011,MZ380012,MZ380013,MZ380014,MZ380015,MZ380016,MZ380017,MZ380018,MZ380019,MZ380020,MZ380021,MZ380022,MZ380023,MZ380024,MZ380025,MZ380026,MZ380027,MZ380028,MZ380029,MZ380030,MZ380031,MZ380032,MZ380033,MZ380034,MZ380035,MZ380036,MZ380037,MZ380038,MZ380039,MZ380040,MZ380041,MZ380042,MZ380043,MZ380044,MZ380045,MZ380046,MZ380047,MZ380048,MZ380049,MZ380050,MZ380051,MZ380052,MZ380053,MZ380054,MZ380055,MZ380056,MZ380057,MZ380058,MZ380059,MZ380060,MZ380061,MZ380062,MZ380063,MZ380064,MZ380065,MZ380066,MZ380067,MZ380068,MZ380069,MZ380070,MZ380071,MZ380072,MZ380073,MZ380074,MZ380075,MZ380076,MZ380077,MZ380078,MZ380079,MZ380080,MZ380081,MZ380082,MZ380083,MZ380084,MZ380085,MZ380086,MZ380087,MZ380088,MZ380089,MZ380090,MZ380091,MZ380092,MZ380093,MZ380094,MZ380095,MZ380096,MZ380097,MZ380098,MZ380099,MZ380100,MZ380101,MZ380102,MZ380103,MZ380104,MZ380105,MZ380106,MZ380107,MZ380108,MZ380109,MZ380110,MZ380111,MZ380112,MZ380113,MZ380114,MZ380115,MZ380116,MZ380117,MZ380118,MZ380119,MZ380120,MZ380121,MZ380122,MZ380123,MZ380124,MZ380125,MZ380126,MZ380127,MZ380128,MZ380129,MZ380130,MZ380131,MZ380132,MZ380133,MZ380134,MZ380135,MZ380136,MZ380137,MZ380138,MZ380139,MZ380140,MZ380141,MZ380142,MZ380143,MZ380144,MZ380145,MZ380146,MZ380147,MZ380148,MZ380149,MZ380150,MZ380151,MZ380152,MZ380153,MZ380154,MZ380155,MZ380156,MZ380157,MZ380158,MZ380159,MZ380160,MZ380161,MZ380162,MZ380163,MZ380164,MZ380165,MZ380166,MZ380167,MZ380168,MZ380169,MZ380170,MZ380171,MZ380172,MZ380173,MZ380174,MZ380175,MZ380176,MZ380177,MZ380178,MZ380179,MZ380180,MZ380181,MZ380182,MZ380183,MZ380184,MZ380185,MZ380186,MZ380187,MZ380188,MZ380189,MZ380190,MZ380191,MZ380192,MZ380193,MZ380194,MZ380195,MZ380196,MZ380197,MZ380198,MZ380199,MZ380200,MZ380201,MZ380202,MZ380203,MZ380204,MZ380205,MZ380206,MZ380207,MZ380208,MZ380209,MZ380210,MZ380211,MZ380212,MZ380213,MZ380214,MZ380215,MZ380216,MZ380217,MZ380218,MZ380219,MZ380220,MZ380221,MZ380222,MZ380223,MZ380224,MZ380225,MZ380226,MZ380227,MZ380228,MZ380229,MZ380230,MZ380231,MZ380232,MZ380233,MZ380234,MZ380235,MZ380236,MZ380237,MZ380238,MZ380239,MZ380240,MZ380241,MZ380242,MZ380243,MZ380244,MZ380245,MZ380246,MZ380247,MZ380248,MZ380249,MZ380250,MZ380251,MZ380252,MZ380253,MZ380254,MZ380255,MZ380256,MZ380257,MZ380258,MZ380259,MZ380260,MZ380261,MZ380262,MZ380263,MZ380264,MZ380265,MZ380266,MZ380267,MZ380268,MZ380269,MZ380270,MZ380271,MZ380272,MZ380273,MZ380274,MZ380275,MZ380276,MZ380277,MZ380278,MZ380279,MZ380280,MZ380281,MZ380282,MZ380283,MZ380284,MZ380285,MZ380286,MZ380287,MZ380288,MZ380289,MZ380290,MZ380291,MZ380292,MZ380293,MZ380294,MZ380295,MZ380296,MZ380297,MZ380298,MZ380299,MZ380300,MZ380301,MZ380302,MZ380303,MZ380304,MZ380305,MZ380306,MZ380307,MZ380308,MZ380309,MZ380310,MZ380311,MZ380312,MZ380313,MZ380314,MZ380315,MZ380316,MZ380317,MZ380318,MZ380319,MZ380320,MZ380321,MZ380322,MZ380323,MZ380324,MZ380325,MZ380326,MZ380327,MZ380328,MZ380329,MZ380330,MZ380331,MZ380332,MZ380333,MZ380334,MZ380335,MZ380336,MZ380337,MZ380338,MZ380339,MZ380340,MZ380341,MZ380342,MZ380343,MZ380344,MZ380345,MZ380346,MZ380347,MZ380348,MZ380349,MZ380350,MZ380351,MZ380352,MZ380353,MZ380354,MZ380355,MZ380356,MZ380357,MZ380358,MZ380359,MZ380360,MZ380361,MZ380362,MZ380363,MZ380364,MZ380365,MZ380366,MZ380367,MZ380368,MZ380369,MZ380370,MZ380371,MZ380372,MZ380373,MZ380374,MZ380375,MZ380376,MZ380377,MZ380378,MZ380379,MZ380380,MZ380381,MZ380382,MZ380383,MZ380384,MZ380385,MZ380386,MZ380387,MZ380388,MZ380389,MZ380390,MZ380391,MZ380392,MZ380393,MZ380394,MZ380395,MZ380396,MZ380397,MZ380398,MZ380399,MZ380400,MZ380401,MZ380402,MZ380403,MZ380404,MZ380405,MZ380406,MZ380407,MZ380408,MZ380409,MZ380410,MZ380411,MZ380412,MZ380413,MZ380414,MZ380415,MZ380416,MZ380417,MZ380418,MZ380419,MZ380420,MZ380421,MZ380422,MZ380423,MZ380424,MZ380425,MZ380426,MZ380427,MZ380428,MZ380429,MZ380430,MZ380431,MZ380432,MZ380433,MZ380434,MZ380435,MZ380436,MZ380437,MZ380438,MZ380439,MZ380440,MZ380441,MZ380442,MZ380443,MZ380444,MZ380445,MZ380446,MZ380447,MZ380448,MZ380449,MZ380450,MZ380451,MZ380452,MZ380453,MZ380454,MZ380455,MZ380456,MZ380457,MZ380458,MZ380459,MZ380460,MZ380461,MZ380462,MZ380463,MZ380464,MZ380465,MZ380466,MZ380467,MZ380468,MZ380469,MZ380470,MZ380471,MZ380472,MZ380473,MZ380474,MZ380475,MZ380476,MZ380477,MZ380478,MZ380479,MZ380480,MZ380481,MZ380



|           |                                                                                                                                                                                                                                                                                                                                                                                                                                                                                                                                                                                                                                                                                                                                                                                                                                                                                                                                                                                                    |
|-----------|----------------------------------------------------------------------------------------------------------------------------------------------------------------------------------------------------------------------------------------------------------------------------------------------------------------------------------------------------------------------------------------------------------------------------------------------------------------------------------------------------------------------------------------------------------------------------------------------------------------------------------------------------------------------------------------------------------------------------------------------------------------------------------------------------------------------------------------------------------------------------------------------------------------------------------------------------------------------------------------------------|
| VC_490_1  | MN087708,MN882610,MZ348423,OL989991,ON630910                                                                                                                                                                                                                                                                                                                                                                                                                                                                                                                                                                                                                                                                                                                                                                                                                                                                                                                                                       |
| VC_490_2  | KF835987                                                                                                                                                                                                                                                                                                                                                                                                                                                                                                                                                                                                                                                                                                                                                                                                                                                                                                                                                                                           |
| VC_490_3  | HE956709,KY593455                                                                                                                                                                                                                                                                                                                                                                                                                                                                                                                                                                                                                                                                                                                                                                                                                                                                                                                                                                                  |
| VC_490_4  | KP202158                                                                                                                                                                                                                                                                                                                                                                                                                                                                                                                                                                                                                                                                                                                                                                                                                                                                                                                                                                                           |
| VC_490_5  | MH059636                                                                                                                                                                                                                                                                                                                                                                                                                                                                                                                                                                                                                                                                                                                                                                                                                                                                                                                                                                                           |
| VC_490_6  | MT920315                                                                                                                                                                                                                                                                                                                                                                                                                                                                                                                                                                                                                                                                                                                                                                                                                                                                                                                                                                                           |
| VC_491_0  | CP062992,KR269720,KT239446,KX258185,KY000080,LR877331,MG751100,MH333064,MH729874,MK421971,MN101226,MN101229,MN101230,MN434095,MT580897,MT701588,MW021752,MW239157,MZ560702,MZ602148,MZ890186,OK499980,OK499981,OK499996,OK499997,OK631811,OL539458,OL870318,OL870319,OM337876,OM630219,ON550260,OP331213,OP617748,OU509536                                                                                                                                                                                                                                                                                                                                                                                                                                                                                                                                                                                                                                                                         |
| VC_491_1  | MN101225                                                                                                                                                                                                                                                                                                                                                                                                                                                                                                                                                                                                                                                                                                                                                                                                                                                                                                                                                                                           |
| VC_492_0  | HQ698922,MK240351                                                                                                                                                                                                                                                                                                                                                                                                                                                                                                                                                                                                                                                                                                                                                                                                                                                                                                                                                                                  |
| VC_492_1  | CAKLQC020000001,CAKLQD020000001,MH165274,MH460829,MH713599,MN648195,MN662249,MN709128,MN723850,MN732883,MN782535,MT385367,MT409116,MT7741943,OL763420,OL770258,OL770259,OL770261,OL770262,OP585103                                                                                                                                                                                                                                                                                                                                                                                                                                                                                                                                                                                                                                                                                                                                                                                                 |
| VC_492_2  | MK278860,MN864865,MT949699,MW388001,MW388002,MW388003,MW388004,OL770260                                                                                                                                                                                                                                                                                                                                                                                                                                                                                                                                                                                                                                                                                                                                                                                                                                                                                                                            |
| VC_492_3  | GU911519                                                                                                                                                                                                                                                                                                                                                                                                                                                                                                                                                                                                                                                                                                                                                                                                                                                                                                                                                                                           |
| VC_492_4  | HM004124                                                                                                                                                                                                                                                                                                                                                                                                                                                                                                                                                                                                                                                                                                                                                                                                                                                                                                                                                                                           |
| VC_492_5  | HM032710                                                                                                                                                                                                                                                                                                                                                                                                                                                                                                                                                                                                                                                                                                                                                                                                                                                                                                                                                                                           |
| VC_492_6  | HM114315                                                                                                                                                                                                                                                                                                                                                                                                                                                                                                                                                                                                                                                                                                                                                                                                                                                                                                                                                                                           |
| VC_493_0  | KT932418                                                                                                                                                                                                                                                                                                                                                                                                                                                                                                                                                                                                                                                                                                                                                                                                                                                                                                                                                                                           |
| VC_493_1  | MG592562                                                                                                                                                                                                                                                                                                                                                                                                                                                                                                                                                                                                                                                                                                                                                                                                                                                                                                                                                                                           |
| VC_493_10 | HQ634156                                                                                                                                                                                                                                                                                                                                                                                                                                                                                                                                                                                                                                                                                                                                                                                                                                                                                                                                                                                           |
| VC_493_11 | KX507046                                                                                                                                                                                                                                                                                                                                                                                                                                                                                                                                                                                                                                                                                                                                                                                                                                                                                                                                                                                           |
| VC_493_12 | MW824371,MW824372                                                                                                                                                                                                                                                                                                                                                                                                                                                                                                                                                                                                                                                                                                                                                                                                                                                                                                                                                                                  |
| VC_493_13 | MW824376                                                                                                                                                                                                                                                                                                                                                                                                                                                                                                                                                                                                                                                                                                                                                                                                                                                                                                                                                                                           |
| VC_493_14 | HQ316579                                                                                                                                                                                                                                                                                                                                                                                                                                                                                                                                                                                                                                                                                                                                                                                                                                                                                                                                                                                           |
| VC_493_15 | HQ634195                                                                                                                                                                                                                                                                                                                                                                                                                                                                                                                                                                                                                                                                                                                                                                                                                                                                                                                                                                                           |
| VC_493_16 | MG592553                                                                                                                                                                                                                                                                                                                                                                                                                                                                                                                                                                                                                                                                                                                                                                                                                                                                                                                                                                                           |
| VC_493_2  | MG592529                                                                                                                                                                                                                                                                                                                                                                                                                                                                                                                                                                                                                                                                                                                                                                                                                                                                                                                                                                                           |
| VC_493_3  | OX241437                                                                                                                                                                                                                                                                                                                                                                                                                                                                                                                                                                                                                                                                                                                                                                                                                                                                                                                                                                                           |
| VC_493_4  | OX241455                                                                                                                                                                                                                                                                                                                                                                                                                                                                                                                                                                                                                                                                                                                                                                                                                                                                                                                                                                                           |
| VC_493_5  | AP014858                                                                                                                                                                                                                                                                                                                                                                                                                                                                                                                                                                                                                                                                                                                                                                                                                                                                                                                                                                                           |
| VC_493_6  | MG592495                                                                                                                                                                                                                                                                                                                                                                                                                                                                                                                                                                                                                                                                                                                                                                                                                                                                                                                                                                                           |
| VC_493_7  | HQ634157                                                                                                                                                                                                                                                                                                                                                                                                                                                                                                                                                                                                                                                                                                                                                                                                                                                                                                                                                                                           |
| VC_493_8  | MG592441                                                                                                                                                                                                                                                                                                                                                                                                                                                                                                                                                                                                                                                                                                                                                                                                                                                                                                                                                                                           |
| VC_493_9  | ON922990                                                                                                                                                                                                                                                                                                                                                                                                                                                                                                                                                                                                                                                                                                                                                                                                                                                                                                                                                                                           |
| VC_495_0  | KY883638,KY883639,KY883640,MH310933,MH310935,MN419153,MW794150,MW794151,MW794152,MW794153,MW794154,MW794155,MW794156,MW794157,MW794158,MW794159,MW794160,MW794161,MW794162,MW794163,MW794164,MW794165,MW794166,MW794167,MW794168,MW794169,MW794170,MW794171,MW794172,MW794173,MW794176,MW794177,MW794179,MW794180,MW794182,MW794183,MW794188,MW794190,MZ292654                                                                                                                                                                                                                                                                                                                                                                                                                                                                                                                                                                                                                                     |
| VC_495_1  | HQ641347,HQ641348,HQ641349,HQ641350,HQ641351,HQ641352,HQ641353,HQ641354,KY065147,KY883634,KY883635,KY883636,KY883637,MH310934,MH310936,MN402506,MW794140,MW794141,MW794142,MW794143,MW794144,MW794145,MW794146,MW794147,MW794148,MW794149,MW794174,MW794175,MW794178,MW794181,MW794184,MW794185,MW794186,MW794187,MW794189,MW794191,MW794192,MW911612,MW911613,MW911614,MW911615                                                                                                                                                                                                                                                                                                                                                                                                                                                                                                                                                                                                                   |
| VC_496_0  | KF302034                                                                                                                                                                                                                                                                                                                                                                                                                                                                                                                                                                                                                                                                                                                                                                                                                                                                                                                                                                                           |
| VC_496_1  | MF370964                                                                                                                                                                                                                                                                                                                                                                                                                                                                                                                                                                                                                                                                                                                                                                                                                                                                                                                                                                                           |
| VC_496_2  | KR534323                                                                                                                                                                                                                                                                                                                                                                                                                                                                                                                                                                                                                                                                                                                                                                                                                                                                                                                                                                                           |
| VC_496_3  | KX822733                                                                                                                                                                                                                                                                                                                                                                                                                                                                                                                                                                                                                                                                                                                                                                                                                                                                                                                                                                                           |
| VC_497_0  | MG592459                                                                                                                                                                                                                                                                                                                                                                                                                                                                                                                                                                                                                                                                                                                                                                                                                                                                                                                                                                                           |
| VC_497_1  | MG592473                                                                                                                                                                                                                                                                                                                                                                                                                                                                                                                                                                                                                                                                                                                                                                                                                                                                                                                                                                                           |
| VC_498_0  | AP014887,AY328852,AY328853,KF854250,KX196154,KY622015,MG592395,OL658619                                                                                                                                                                                                                                                                                                                                                                                                                                                                                                                                                                                                                                                                                                                                                                                                                                                                                                                            |
| VC_499_0  | KT160311,MG592392,MG592401,MG592414,MG592451,MG592461,MG592462,MG592467,MG592468,MG592472,MG592499,MG592526,MG592531,MG592541,MG592542,MG592547,MG592561,MG592572,MG592590,MG592592,MG592611,MW824380,MW824381,MW824382                                                                                                                                                                                                                                                                                                                                                                                                                                                                                                                                                                                                                                                                                                                                                                            |
| VC_50_0   | AP083977,GQ357916,KP010268,LR595867,MT374852,MT374853,MT374854,MT374856,MT591577                                                                                                                                                                                                                                                                                                                                                                                                                                                                                                                                                                                                                                                                                                                                                                                                                                                                                                                   |
| VC_500_0  | OM287554,OM732336,OM732337                                                                                                                                                                                                                                                                                                                                                                                                                                                                                                                                                                                                                                                                                                                                                                                                                                                                                                                                                                         |
| VC_501_0  | AP014888,MG592509,MG592546,MG592620,MG592623,OX241426,OX241428,OX241430,OX241431,OX241432,OX241441,OX241448,OX241449,OX241494,OX241567,OX241568                                                                                                                                                                                                                                                                                                                                                                                                                                                                                                                                                                                                                                                                                                                                                                                                                                                    |
| VC_505_0  | MW353175,MW353176,MW353177                                                                                                                                                                                                                                                                                                                                                                                                                                                                                                                                                                                                                                                                                                                                                                                                                                                                                                                                                                         |
| VC_506_0  | KR560069,MK580972,MN095772,MN098328,MZ042490,MZ326868,MZ398248,OL702939                                                                                                                                                                                                                                                                                                                                                                                                                                                                                                                                                                                                                                                                                                                                                                                                                                                                                                                            |
| VC_506_1  | ON758385                                                                                                                                                                                                                                                                                                                                                                                                                                                                                                                                                                                                                                                                                                                                                                                                                                                                                                                                                                                           |
| VC_507_0  | AP018462,AP018463,KY130461,MH001446,MH001450,MK494114,MK494131,MK494132                                                                                                                                                                                                                                                                                                                                                                                                                                                                                                                                                                                                                                                                                                                                                                                                                                                                                                                            |
| VC_508_0  | AY129334,DQ398048,JN618996,JN698991,JN699004,KF024722,KM101117,KR997932,KT365402,KT880194,KX443696,MG757162,MG812490,MG812491,MH001452,MH051249,MH590591,MH697584,MH727546,MK061411,MK620898,MK814751,MN234225,MN428049,MN586045,MN586046,MN813678,MT639652,MW712731,MZ456036,ON970587,ON970593                                                                                                                                                                                                                                                                                                                                                                                                                                                                                                                                                                                                                                                                                                    |
| VC_509_0  | DQ398049,EUR16589,EJ641182,JF704095,JN698992,JN699003,JN699006,JN699018,KF493879,KJ194581,KJ194584,KP027207,KR080203,KR080205,MG839014,MG920059,MG925338,MG925353,MH051265,MH316565,MH513976,MH576977,MK061414,MK359357,MN096359,MN096360,MN234223,MN444872,MN444873,MT310871,MT310892,MT952851,MW924644,MZ171375,MZ171381,OK318960,OP434441                                                                                                                                                                                                                                                                                                                                                                                                                                                                                                                                                                                                                                                       |
| VC_51_0   | AB285204,JO182728,LR595868,LR597641,MF807953,MW057859,ON470578,ON470598,ON470618,OV696610                                                                                                                                                                                                                                                                                                                                                                                                                                                                                                                                                                                                                                                                                                                                                                                                                                                                                                          |
| VC_510_0  | MH153810,MK801725,MN234196,MN369758,MN908693,MT657335,OK216879,OM105886,ON081333,ON108644,ON260813,OP434461                                                                                                                                                                                                                                                                                                                                                                                                                                                                                                                                                                                                                                                                                                                                                                                                                                                                                        |
| VC_511_0  | JN698995,OP172873,OP172874                                                                                                                                                                                                                                                                                                                                                                                                                                                                                                                                                                                                                                                                                                                                                                                                                                                                                                                                                                         |
| VC_513_0  | AP018485,JF704111,JF957058,KC172839,KJ510415,KM592966,KT326767,KX640831,KX670828,KX683423,KY469436,LC730317,MF373840,MG812492,MH020248,MH047632,MH047633,MH051259,MH316563,MH976517,MK284519,MK494127,MK524496,MN062706,MN062712,MN586063,MT310878,MT310879,MT310880,MT310881,MW712718,ON970623                                                                                                                                                                                                                                                                                                                                                                                                                                                                                                                                                                                                                                                                                                    |
| VC_514_0  | AY129332,HM755814,JF704098,JF704101,JF704114,KC661272,KC661281,KF279418,KM101119,KM233454,KM233455,KP017310,KP017311,KP027202,KT359365,KT381277,KU255188,KU578077,KU984914,KU985091,KX458237,KX507362,KX523125,KX664448,KX670788,KX808129,KY965063,MFI85729,MFI85732,MFI85733,MG757161,MG925341,MG925355,MH020238,MH077583,MH155864,MH338240,MH371121,MH399776,MH450119,MH450124,MH450126,MH450128,MH513975,MH536813,MH536825,MH576949,MH651179,MH727554,MK112543,MK279903,MK279913,MK284518,MK310140,MK359341,MK433273,MK494096,MK494128,MK875800,MK967399,MN062718,MN096368,MN284900,MN497953,MN585969,MN585984,MN586048,MN813699,MT657331,MT897907,MW507128,MZ6681518,MZ747514,OK318959,OK999978                                                                                                                                                                                                                                                                                                |
| VC_515_0  | JQS12844,JX307704,JX411619,KC661279,KJ156985,KM101120,MF737350,MH001459,MK494124,MN586038,MN807247,MT522002,MZ222017,MZ355723,MZ622159,ON337196                                                                                                                                                                                                                                                                                                                                                                                                                                                                                                                                                                                                                                                                                                                                                                                                                                                    |
| VC_516_0  | MW314854,MW584159,MW584197                                                                                                                                                                                                                                                                                                                                                                                                                                                                                                                                                                                                                                                                                                                                                                                                                                                                                                                                                                         |
| VC_517_0  | JF704093,JN243857,KX550442,KX579975,KX641260,KY083059,MF688278,MK279898,MK359310,MK359322,MK494115,MK494117,MK494129,MK875799,MN284905,MN813697,MZ322023,ON970614                                                                                                                                                                                                                                                                                                                                                                                                                                                                                                                                                                                                                                                                                                                                                                                                                                  |
| VC_517_1  | GQ303263,HM152766,JF792674,JN243856,JN561150,JN699015,JQ809701,JQ896627,JX307702,JX307703,KC661271,KF024733,KF841475,KF841476,KF954506,KF959563,KJ510414,KP027198,KP057620,KT365397,KT716493,KU055616,KU867906,KU985092,KU985094,KX458236,KX550441,KX557234,KX619651,KX648373,KX808130,KX817174,KX817175,KY006473,KY083058,KY083060,KY083061,KY083062,KY083063,KY204244,KY204245,KY204246,KY204247,KY204248,KY204249,KY204250,KY204251,KY471266,KY549155,MF919496,MF919509,MG099942,MG944217,MG944224,MG962373,MH020249,MH051247,MH077581,MH155875,MH155879,MH230877,MH399777,MH399785,MH479909,MH479911,MH509443,MH536817,MH651170,MH697588,MH727563,MH825710,MK279902,MK310145,MK359323,MK359325,MK359340,MK359356,MK494088,MK494093,MK494094,MK494097,MK494101,MK494125,MK494126,MK878895,MK878905,MN728684,MN813696,MT114158,MT490373,MT498056,MT553338,MT553346,MT723939,MT818417,MT889382,MT889386,MT889390,MW291019,MZ005673,MZ171380,MZ322025,MZ355725,MZ747509,ON637771,ON970565,OP297529 |
| VC_518_0  | AP018487,EJ686559,HM152765,JN699001,MN234195,MN234236                                                                                                                                                                                                                                                                                                                                                                                                                                                                                                                                                                                                                                                                                                                                                                                                                                                                                                                                              |
| VC_518_1  | AY129333,KP027201                                                                                                                                                                                                                                                                                                                                                                                                                                                                                                                                                                                                                                                                                                                                                                                                                                                                                                                                                                                  |
| VC_519_0  | JN412591,JN872061,KC691256,KF841477,KP027200,KR080195,KT347313,KU985090,KX641262,MFI133446,MFI140399,MF281061,MF373843,MF472894,MF919492,MG198785,MK016499,MK494122,MK524508,MK814758,MK820639,MK919480,MK937604,MN010757,MN096356,MN585977,MN807248,MN807249,MN807250,MN892484,MN892486,MN908683,MT024866,MT498061,MW055902,ON637760,ON970574,OP172867,OP434454                                                                                                                                                                                                                                                                                                                                                                                                                                                                                                                                                                                                                                   |



|           |                                                                                                                                                                                                                                                                                                                                                                                                                                                                                                                                                                                                                                                                                                                                                                                                                |
|-----------|----------------------------------------------------------------------------------------------------------------------------------------------------------------------------------------------------------------------------------------------------------------------------------------------------------------------------------------------------------------------------------------------------------------------------------------------------------------------------------------------------------------------------------------------------------------------------------------------------------------------------------------------------------------------------------------------------------------------------------------------------------------------------------------------------------------|
| VC_52_0   | AB259123,AB434711,AB937974,AB981170,KX179905,MF716957,ON170020,ON170023,ON170029,ON170030,ON170034,ON170037,ON170041,ON170050,ON170055,ON170087,ON170089,ON170091,ON170093,ON170095,ON170097,ON170101,ON170103,ON170105,ON170107,ON170109,ON170111,ON170113,ON170115,ON170117,ON170119,ON170121,ON170125,ON170127,ON170132,ON170143,ON170145,ON170147,ON170153,ON170155,ON170157,ON170159,ON170161,ON170163,ON170165,ON170168,ON170193,ON170195,ON170197,ON170199,ON170201,ON170203,ON170205,ON170207,ON170212,ON170216,ON170218,ON170220,ON170223,ON170226,ON170245,ON170247,ON170249,ON170251,ON170253,ON170273,ON170277,ON170281,ON170283,ON170285,ON170290,ON170292,ON170294,ON170296,ON170299,ON170301,ON170308,ON170312,ON170314,ON170316,ON170331,ON170333,ON170335,ON170337,ON170339,ON170341,ON170353 |
| VC_520_0  | KT309034                                                                                                                                                                                                                                                                                                                                                                                                                                                                                                                                                                                                                                                                                                                                                                                                       |
| VC_520_1  | MT889374                                                                                                                                                                                                                                                                                                                                                                                                                                                                                                                                                                                                                                                                                                                                                                                                       |
| VC_520_10 | MN369752                                                                                                                                                                                                                                                                                                                                                                                                                                                                                                                                                                                                                                                                                                                                                                                                       |
| VC_520_11 | MN585995                                                                                                                                                                                                                                                                                                                                                                                                                                                                                                                                                                                                                                                                                                                                                                                                       |
| VC_520_12 | MN735431                                                                                                                                                                                                                                                                                                                                                                                                                                                                                                                                                                                                                                                                                                                                                                                                       |
| VC_520_13 | KT281793                                                                                                                                                                                                                                                                                                                                                                                                                                                                                                                                                                                                                                                                                                                                                                                                       |
| VC_520_14 | MT684595                                                                                                                                                                                                                                                                                                                                                                                                                                                                                                                                                                                                                                                                                                                                                                                                       |
| VC_520_15 | MF668270,MT684593                                                                                                                                                                                                                                                                                                                                                                                                                                                                                                                                                                                                                                                                                                                                                                                              |
| VC_520_16 | KX808131                                                                                                                                                                                                                                                                                                                                                                                                                                                                                                                                                                                                                                                                                                                                                                                                       |
| VC_520_17 | MN369739                                                                                                                                                                                                                                                                                                                                                                                                                                                                                                                                                                                                                                                                                                                                                                                                       |
| VC_520_18 | MN586001                                                                                                                                                                                                                                                                                                                                                                                                                                                                                                                                                                                                                                                                                                                                                                                                       |
| VC_520_19 | KM652553,MN369749                                                                                                                                                                                                                                                                                                                                                                                                                                                                                                                                                                                                                                                                                                                                                                                              |
| VC_520_2  | KR824843                                                                                                                                                                                                                                                                                                                                                                                                                                                                                                                                                                                                                                                                                                                                                                                                       |
| VC_520_20 | JN699012                                                                                                                                                                                                                                                                                                                                                                                                                                                                                                                                                                                                                                                                                                                                                                                                       |
| VC_520_21 | MH669001                                                                                                                                                                                                                                                                                                                                                                                                                                                                                                                                                                                                                                                                                                                                                                                                       |
| VC_520_22 | OP068340                                                                                                                                                                                                                                                                                                                                                                                                                                                                                                                                                                                                                                                                                                                                                                                                       |
| VC_520_23 | JN859129,KF024723                                                                                                                                                                                                                                                                                                                                                                                                                                                                                                                                                                                                                                                                                                                                                                                              |
| VC_520_24 | EF536069                                                                                                                                                                                                                                                                                                                                                                                                                                                                                                                                                                                                                                                                                                                                                                                                       |
| VC_520_25 | MH590598                                                                                                                                                                                                                                                                                                                                                                                                                                                                                                                                                                                                                                                                                                                                                                                                       |
| VC_520_26 | HQ728524,JN698996,JX121091                                                                                                                                                                                                                                                                                                                                                                                                                                                                                                                                                                                                                                                                                                                                                                                     |
| VC_520_27 | KT281792,KY471267                                                                                                                                                                                                                                                                                                                                                                                                                                                                                                                                                                                                                                                                                                                                                                                              |
| VC_520_28 | JN020141,MT114167                                                                                                                                                                                                                                                                                                                                                                                                                                                                                                                                                                                                                                                                                                                                                                                              |
| VC_520_29 | KM597530                                                                                                                                                                                                                                                                                                                                                                                                                                                                                                                                                                                                                                                                                                                                                                                                       |
| VC_520_3  | MF668287                                                                                                                                                                                                                                                                                                                                                                                                                                                                                                                                                                                                                                                                                                                                                                                                       |
| VC_520_30 | MH825707,ON526976                                                                                                                                                                                                                                                                                                                                                                                                                                                                                                                                                                                                                                                                                                                                                                                              |
| VC_520_31 | FJ174690,GIU060500,JF937093,KT281795,MH020235,MH077580,MK016494,MN585973,MW924649,MZ681519,OP297536                                                                                                                                                                                                                                                                                                                                                                                                                                                                                                                                                                                                                                                                                                            |
| VC_520_32 | MH651178                                                                                                                                                                                                                                                                                                                                                                                                                                                                                                                                                                                                                                                                                                                                                                                                       |
| VC_520_33 | MH371123,MN369755                                                                                                                                                                                                                                                                                                                                                                                                                                                                                                                                                                                                                                                                                                                                                                                              |
| VC_520_34 | MH077578                                                                                                                                                                                                                                                                                                                                                                                                                                                                                                                                                                                                                                                                                                                                                                                                       |
| VC_520_35 | KR997930,KR997931,KR997968                                                                                                                                                                                                                                                                                                                                                                                                                                                                                                                                                                                                                                                                                                                                                                                     |
| VC_520_36 | MH744415                                                                                                                                                                                                                                                                                                                                                                                                                                                                                                                                                                                                                                                                                                                                                                                                       |
| VC_520_37 | JF937102                                                                                                                                                                                                                                                                                                                                                                                                                                                                                                                                                                                                                                                                                                                                                                                                       |
| VC_520_38 | KJ025956,MH155865,MH155871,MH590602,MK524517,MT310893                                                                                                                                                                                                                                                                                                                                                                                                                                                                                                                                                                                                                                                                                                                                                          |
| VC_520_39 | MH371120                                                                                                                                                                                                                                                                                                                                                                                                                                                                                                                                                                                                                                                                                                                                                                                                       |
| VC_520_4  | MH155866                                                                                                                                                                                                                                                                                                                                                                                                                                                                                                                                                                                                                                                                                                                                                                                                       |
| VC_520_40 | KU865302,KY965064,MH371115,MT553345                                                                                                                                                                                                                                                                                                                                                                                                                                                                                                                                                                                                                                                                                                                                                                            |
| VC_520_41 | MH651183,MN586011                                                                                                                                                                                                                                                                                                                                                                                                                                                                                                                                                                                                                                                                                                                                                                                              |
| VC_520_42 | MH399771                                                                                                                                                                                                                                                                                                                                                                                                                                                                                                                                                                                                                                                                                                                                                                                                       |
| VC_520_43 | JN020143,ON456356,ON970562                                                                                                                                                                                                                                                                                                                                                                                                                                                                                                                                                                                                                                                                                                                                                                                     |
| VC_520_44 | KY348865                                                                                                                                                                                                                                                                                                                                                                                                                                                                                                                                                                                                                                                                                                                                                                                                       |
| VC_520_45 | KT895281,MG872841,MH316564,MH399784,MH651169,MH834617,MK494110                                                                                                                                                                                                                                                                                                                                                                                                                                                                                                                                                                                                                                                                                                                                                 |
| VC_520_46 | MZ274306                                                                                                                                                                                                                                                                                                                                                                                                                                                                                                                                                                                                                                                                                                                                                                                                       |
| VC_520_47 | MT684586                                                                                                                                                                                                                                                                                                                                                                                                                                                                                                                                                                                                                                                                                                                                                                                                       |
| VC_520_48 | MZ171378                                                                                                                                                                                                                                                                                                                                                                                                                                                                                                                                                                                                                                                                                                                                                                                                       |
| VC_520_49 | KM101122                                                                                                                                                                                                                                                                                                                                                                                                                                                                                                                                                                                                                                                                                                                                                                                                       |
| VC_520_5  | MH727548                                                                                                                                                                                                                                                                                                                                                                                                                                                                                                                                                                                                                                                                                                                                                                                                       |
| VC_520_50 | MT897904                                                                                                                                                                                                                                                                                                                                                                                                                                                                                                                                                                                                                                                                                                                                                                                                       |
| VC_520_51 | MH051257                                                                                                                                                                                                                                                                                                                                                                                                                                                                                                                                                                                                                                                                                                                                                                                                       |
| VC_520_52 | KC736071                                                                                                                                                                                                                                                                                                                                                                                                                                                                                                                                                                                                                                                                                                                                                                                                       |
| VC_520_53 | KY385384                                                                                                                                                                                                                                                                                                                                                                                                                                                                                                                                                                                                                                                                                                                                                                                                       |
| VC_520_54 | OM105885                                                                                                                                                                                                                                                                                                                                                                                                                                                                                                                                                                                                                                                                                                                                                                                                       |
| VC_520_55 | OP297542                                                                                                                                                                                                                                                                                                                                                                                                                                                                                                                                                                                                                                                                                                                                                                                                       |
| VC_520_56 | KM279937                                                                                                                                                                                                                                                                                                                                                                                                                                                                                                                                                                                                                                                                                                                                                                                                       |
| VC_520_57 | MK359343                                                                                                                                                                                                                                                                                                                                                                                                                                                                                                                                                                                                                                                                                                                                                                                                       |
| VC_520_58 | DQ398050,EU816590,ON970595                                                                                                                                                                                                                                                                                                                                                                                                                                                                                                                                                                                                                                                                                                                                                                                     |
| VC_520_59 | JN542517,MH001448,MN585987,MN586005,MZ681512                                                                                                                                                                                                                                                                                                                                                                                                                                                                                                                                                                                                                                                                                                                                                                   |
| VC_520_6  | MN586004,MT684597,MT684601                                                                                                                                                                                                                                                                                                                                                                                                                                                                                                                                                                                                                                                                                                                                                                                     |
| VC_520_60 | DQ398045,KT279576                                                                                                                                                                                                                                                                                                                                                                                                                                                                                                                                                                                                                                                                                                                                                                                              |
| VC_520_61 | MW055915                                                                                                                                                                                                                                                                                                                                                                                                                                                                                                                                                                                                                                                                                                                                                                                                       |
| VC_520_62 | ON970566                                                                                                                                                                                                                                                                                                                                                                                                                                                                                                                                                                                                                                                                                                                                                                                                       |
| VC_520_63 | MF919501                                                                                                                                                                                                                                                                                                                                                                                                                                                                                                                                                                                                                                                                                                                                                                                                       |
| VC_520_64 | MG962361                                                                                                                                                                                                                                                                                                                                                                                                                                                                                                                                                                                                                                                                                                                                                                                                       |
| VC_520_65 | MZ747519                                                                                                                                                                                                                                                                                                                                                                                                                                                                                                                                                                                                                                                                                                                                                                                                       |
| VC_520_66 | MN586012                                                                                                                                                                                                                                                                                                                                                                                                                                                                                                                                                                                                                                                                                                                                                                                                       |
| VC_520_67 | ON970610                                                                                                                                                                                                                                                                                                                                                                                                                                                                                                                                                                                                                                                                                                                                                                                                       |
| VC_520_68 | KM347889                                                                                                                                                                                                                                                                                                                                                                                                                                                                                                                                                                                                                                                                                                                                                                                                       |
| VC_520_69 | MH669014                                                                                                                                                                                                                                                                                                                                                                                                                                                                                                                                                                                                                                                                                                                                                                                                       |
| VC_520_7  | MN310548                                                                                                                                                                                                                                                                                                                                                                                                                                                                                                                                                                                                                                                                                                                                                                                                       |
| VC_520_70 | KC661280                                                                                                                                                                                                                                                                                                                                                                                                                                                                                                                                                                                                                                                                                                                                                                                                       |
| VC_520_71 | FJ174693                                                                                                                                                                                                                                                                                                                                                                                                                                                                                                                                                                                                                                                                                                                                                                                                       |
| VC_520_72 | MK494118                                                                                                                                                                                                                                                                                                                                                                                                                                                                                                                                                                                                                                                                                                                                                                                                       |
| VC_520_73 | KR935214,MH669012                                                                                                                                                                                                                                                                                                                                                                                                                                                                                                                                                                                                                                                                                                                                                                                              |



|           |                                                                                                                                                                                                                                                                                                                                              |
|-----------|----------------------------------------------------------------------------------------------------------------------------------------------------------------------------------------------------------------------------------------------------------------------------------------------------------------------------------------------|
| VC_520_74 | JF704117,MK112556                                                                                                                                                                                                                                                                                                                            |
| VC_520_75 | MN310544                                                                                                                                                                                                                                                                                                                                     |
| VC_520_76 | JN398368,MT114164                                                                                                                                                                                                                                                                                                                            |
| VC_520_77 | JQ300538,KXS76644,MK016496                                                                                                                                                                                                                                                                                                                   |
| VC_520_78 | MH590596,OP297528                                                                                                                                                                                                                                                                                                                            |
| VC_520_79 | KC661278                                                                                                                                                                                                                                                                                                                                     |
| VC_520_8  | MZ958744                                                                                                                                                                                                                                                                                                                                     |
| VC_520_80 | MH651188,MH669003,MK359315                                                                                                                                                                                                                                                                                                                   |
| VC_520_81 | MF919526                                                                                                                                                                                                                                                                                                                                     |
| VC_520_82 | MN310545                                                                                                                                                                                                                                                                                                                                     |
| VC_520_83 | KX610764                                                                                                                                                                                                                                                                                                                                     |
| VC_520_84 | ON970585                                                                                                                                                                                                                                                                                                                                     |
| VC_520_85 | KT895280,MN369751                                                                                                                                                                                                                                                                                                                            |
| VC_520_86 | MZ747512                                                                                                                                                                                                                                                                                                                                     |
| VC_520_87 | MK524503                                                                                                                                                                                                                                                                                                                                     |
| VC_520_88 | JN020142                                                                                                                                                                                                                                                                                                                                     |
| VC_520_89 | MN585975                                                                                                                                                                                                                                                                                                                                     |
| VC_520_9  | KF114874                                                                                                                                                                                                                                                                                                                                     |
| VC_520_90 | MK016504                                                                                                                                                                                                                                                                                                                                     |
| VC_520_91 | MZ209299                                                                                                                                                                                                                                                                                                                                     |
| VC_520_92 | KM402757,MK359307,MN428051,MT889396,MT889397                                                                                                                                                                                                                                                                                                 |
| VC_520_93 | JF937098,MH632119                                                                                                                                                                                                                                                                                                                            |
| VC_520_94 | MK967397                                                                                                                                                                                                                                                                                                                                     |
| VC_520_95 | MK224592                                                                                                                                                                                                                                                                                                                                     |
| VC_520_96 | AY129330                                                                                                                                                                                                                                                                                                                                     |
| VC_520_97 | MG925354                                                                                                                                                                                                                                                                                                                                     |
| VC_520_98 | MG812488                                                                                                                                                                                                                                                                                                                                     |
| VC_521_0  | JN256079,JN624851,KC576783,KF986246,KM588359,KU935726,KU935727,KU935728,KU935729,KU935730,KU935731,KX756439,MG099936,MG099948,MH316570,MH399787,MH697576,MH697585,MH697593,MH926055,MK392367,MK524500,MK524509,MK524515,MK524518,MK524520,MK524522,MK524528,MK977708,MT498042,MT498044,MT498048,MT684588,MT723932,MZ622162,OL742561,OP297540 |
| VC_522_0  | KU963256,MN175604,ON645344                                                                                                                                                                                                                                                                                                                   |
| VC_522_1  | MN428053,MN585966,MT521995,OP297548,OP434457                                                                                                                                                                                                                                                                                                 |
| VC_523_0  | MK977709                                                                                                                                                                                                                                                                                                                                     |
| VC_524_0  | MW584176,MW584199                                                                                                                                                                                                                                                                                                                            |
| VC_524_1  | MW584188                                                                                                                                                                                                                                                                                                                                     |
| VC_525_0  | KU963255,KU963257,KXS57273,KXS57287,MH479912,MH479927,MK016492,MK112547,MK801727,MK814755,MK820642,MK875793,MK875796,MK878898,MK919483,MT723938,MT889398,MT952844,MW712717,MW924648,MW924650,MZ171374,MZ274304,OP297546,OP434440                                                                                                             |
| VC_525_1  | KU963249,KU963263,MK919469,MK967384,MT639650                                                                                                                                                                                                                                                                                                 |
| VC_526_0  | MG557979,MG765277,MG765279,MH809529,MH809530,MH809531                                                                                                                                                                                                                                                                                        |
| VC_526_1  | MF787246                                                                                                                                                                                                                                                                                                                                     |
| VC_526_2  | AY682195                                                                                                                                                                                                                                                                                                                                     |
| VC_526_3  | MK504444                                                                                                                                                                                                                                                                                                                                     |
| VC_527_0  | MW202473,MW202478,MW202738                                                                                                                                                                                                                                                                                                                   |
| VC_529_0  | MW824391,MW824401                                                                                                                                                                                                                                                                                                                            |
| VC_53_0   | HM064452,ON170025,ON170069,ON170139,ON170320                                                                                                                                                                                                                                                                                                 |
| VC_530_0  | AP019417,KJ936628,MF431726,MG592626,MK483107,MN062185,MW217515,MW451248,MW748992                                                                                                                                                                                                                                                             |
| VC_531_0  | KC131129,KP671755,KT919972,KT919973,MK568540,MT612988,MT612989,ON000910,ON190025                                                                                                                                                                                                                                                             |
| VC_531_1  | AY283928,JN849462,MN794232,MT135026,OK905446,ON190024                                                                                                                                                                                                                                                                                        |
| VC_531_2  | HQ317393                                                                                                                                                                                                                                                                                                                                     |
| VC_531_3  | MW824377                                                                                                                                                                                                                                                                                                                                     |
| VC_531_4  | MG592456                                                                                                                                                                                                                                                                                                                                     |
| VC_531_5  | MT135025                                                                                                                                                                                                                                                                                                                                     |
| VC_531_6  | MT135024                                                                                                                                                                                                                                                                                                                                     |
| VC_532_0  | AP019524,AP019525                                                                                                                                                                                                                                                                                                                            |
| VC_532_1  | LC168164                                                                                                                                                                                                                                                                                                                                     |
| VC_533_0  | LR756501,LR756503                                                                                                                                                                                                                                                                                                                            |
| VC_533_1  | LR745206                                                                                                                                                                                                                                                                                                                                     |
| VC_533_2  | LR756502                                                                                                                                                                                                                                                                                                                                     |
| VC_533_3  | LR756504                                                                                                                                                                                                                                                                                                                                     |
| VC_534_0  | AP019527,FJ429185,KY554762,KY554763,KY554764,KY554765,KY554766,KY554767,MN528768                                                                                                                                                                                                                                                             |
| VC_536_0  | EF153632,MT708549,MW460246                                                                                                                                                                                                                                                                                                                   |
| VC_539_0  | AY048850,BK013337,BK013338                                                                                                                                                                                                                                                                                                                   |
| VC_54_0   | AB259124,AB828698,AB931172,JQ408219,LC066596,MT495635                                                                                                                                                                                                                                                                                        |
| VC_542_0  | MW478292,OK247671                                                                                                                                                                                                                                                                                                                            |
| VC_543_0  | MG592399,MG592418,MG592419,MG592510,MG592511,MG592579                                                                                                                                                                                                                                                                                        |
| VC_544_0  | MG592447,MG592453                                                                                                                                                                                                                                                                                                                            |
| VC_546_0  | JN201525,MH399772                                                                                                                                                                                                                                                                                                                            |
| VC_546_1  | MN586029,MW314846                                                                                                                                                                                                                                                                                                                            |
| VC_546_10 | AY129338                                                                                                                                                                                                                                                                                                                                     |
| VC_546_11 | JF937101                                                                                                                                                                                                                                                                                                                                     |
| VC_546_2  | JN698997,KM400683,MP919534                                                                                                                                                                                                                                                                                                                   |
| VC_546_3  | KM925136,MP072690,MF133445,MF668284                                                                                                                                                                                                                                                                                                          |
| VC_546_4  | KF114875,MH077579,MH669017,MH697582,MH697583,MH727551,MK524504,MK524521,MK524527,MK524529,MK967379,MK967402,MN062701,MN183286,MZ622169,MZ958748                                                                                                                                                                                              |
| VC_546_5  | MP919504                                                                                                                                                                                                                                                                                                                                     |
| VC_546_6  | KF006818,MP919512                                                                                                                                                                                                                                                                                                                            |
| VC_546_7  | JF937090,JF957059,KM101123,MK279849                                                                                                                                                                                                                                                                                                          |
| VC_546_8  | MW132714                                                                                                                                                                                                                                                                                                                                     |
| VC_546_9  | MK524516                                                                                                                                                                                                                                                                                                                                     |



|           |                                                                                                                                                                                                                                                             |
|-----------|-------------------------------------------------------------------------------------------------------------------------------------------------------------------------------------------------------------------------------------------------------------|
| VC_55_0   | CP006891,CP023680,CP023686                                                                                                                                                                                                                                  |
| VC_550_0  | MW314855,MW314856,MW314858,MW584152,MW584158,MW584161,MW584164,MW584171,MW584179,MW584180,MW584196,MW584204                                                                                                                                                 |
| VC_551_0  | JF937091,JF937106,MG872831,MG872832,MG872843,MH399774,MH399778,MH536820,MK016502,MK359320,MK801726,MK937593,MN096361,MN586013,MT723943,MW291023                                                                                                             |
| VC_551_1  | MF919541,MH576956,MN586043,MN586044                                                                                                                                                                                                                         |
| VC_551_2  | EU816591,JF937096,JN006061,JN006062,KF188414,KR080204,KT222941,KT222942,KU865303,KX817173,KY319168,MH513972,MH513978,MN586032,MN586051,MT114165,MZ2274305                                                                                                   |
| VC_551_3  | KF306380                                                                                                                                                                                                                                                    |
| VC_551_4  | JN412590,KF416343                                                                                                                                                                                                                                           |
| VC_551_5  | MK016491,MK016498                                                                                                                                                                                                                                           |
| VC_551_6  | EU816588,KX611831,KX834009,MG757160,MG872837,MH371112,MH513983,MH536829,MH651174,MH669002,MH727557,MH779503,MK559429,MN428059,MN586034,MN586037,MT952854,MZ622157,MZ681505,OL742559,ON970597,ON970600                                                       |
| VC_551_7  | AY129331,DQ398041,GQ303265,JN382248,JN391441,KC661277,KC691255,KC748971,KF279417,KT020852,KT373978,KY549152,MF668277,MH000607,MH536827,MH576953,MK359309,MK620893,MK757445,MN586017,MN586019,MN586035,MN586041,MN586050,MZ322024,MZ622158,MZ622163,ON456345 |
| VC_551_8  | KC748969,KF024732,KF493883,KF562099,KF562100,KF562101,KF562102,MF919506,MF919524,MF919525,MF919529,MF919535,MF919540,MG099953,MH020247,MH590587,MK433262,MN096364,MTS22005                                                                                  |
| VC_554_0  | JN698994,MPU46938                                                                                                                                                                                                                                           |
| VC_555_0  | MW314852,MW584148,MW584150,MW584154,MW584156,MW584162,MW584163,MW584181,MW584182,MW584192,MW584203,MW584208,MW584212                                                                                                                                        |
| VC_556_0  | AY129335,JN698993,KF017002,KF024730,KJ829260,KT281796,MG099943,MG872838,MH020246,MH590592,MH926062,MN428052,MN428058,MN585964,MT818418,MT818425,MW314845,MW712737,MZ209306,MZ747511,ON260829                                                                |
| VC_557_0  | MK937597,MN096370,OP434458                                                                                                                                                                                                                                  |
| VC_557_1  | MG099939,MH651176,MH651185,MH779504,MK279906,MK376961,MK814752,MZ388553,MZ747510,ON456334,ON526981                                                                                                                                                          |
| VC_557_2  | MH536812                                                                                                                                                                                                                                                    |
| VC_557_3  | MW534375                                                                                                                                                                                                                                                    |
| VC_558_0  | JN204348,JN412592                                                                                                                                                                                                                                           |
| VC_558_1  | GQ303260,MT553335                                                                                                                                                                                                                                           |
| VC_558_10 | MK112534                                                                                                                                                                                                                                                    |
| VC_558_11 | KT281790,MT889395                                                                                                                                                                                                                                           |
| VC_558_12 | KC748970,MH825697,MK359348                                                                                                                                                                                                                                  |
| VC_558_13 | MK359321                                                                                                                                                                                                                                                    |
| VC_558_14 | MG872839,MH316561,MK359303,MK359311,MK359358,MK450427,ON526982,ON637768                                                                                                                                                                                     |
| VC_558_15 | MK359342                                                                                                                                                                                                                                                    |
| VC_558_16 | ON755189                                                                                                                                                                                                                                                    |
| VC_558_17 | MK359328                                                                                                                                                                                                                                                    |
| VC_558_18 | MN183285                                                                                                                                                                                                                                                    |
| VC_558_19 | ON637764                                                                                                                                                                                                                                                    |
| VC_558_2  | EU826471,MH727543                                                                                                                                                                                                                                           |
| VC_558_20 | JF704096,KR080196,MF919493,MH697586,MH697590,MK359326,MK359335,MK359338,MK359339,MK359347,MK359362,MK450432,MN428066,MZ028626,MZ681511,ON081335,ON260824                                                                                                    |
| VC_558_21 | MT723945                                                                                                                                                                                                                                                    |
| VC_558_22 | JF704092,MH590593,MK450423,MZ958745                                                                                                                                                                                                                         |
| VC_558_23 | KX369583                                                                                                                                                                                                                                                    |
| VC_558_24 | OP021681                                                                                                                                                                                                                                                    |
| VC_558_25 | EU826468                                                                                                                                                                                                                                                    |
| VC_558_26 | EU826469                                                                                                                                                                                                                                                    |
| VC_558_27 | MK359361,MW712729                                                                                                                                                                                                                                           |
| VC_558_28 | MK359333                                                                                                                                                                                                                                                    |
| VC_558_29 | MT818416                                                                                                                                                                                                                                                    |
| VC_558_3  | MK359355                                                                                                                                                                                                                                                    |
| VC_558_30 | EU826467,JN699625,MK359344                                                                                                                                                                                                                                  |
| VC_558_31 | DQ398053                                                                                                                                                                                                                                                    |
| VC_558_32 | MK310143                                                                                                                                                                                                                                                    |
| VC_558_33 | MH910040                                                                                                                                                                                                                                                    |
| VC_558_34 | MK112549                                                                                                                                                                                                                                                    |
| VC_558_35 | MT818423                                                                                                                                                                                                                                                    |
| VC_558_36 | MK359336,MK359363,MK359366,MN234193                                                                                                                                                                                                                         |
| VC_558_37 | KT365400                                                                                                                                                                                                                                                    |
| VC_558_38 | MK878897,MN428065                                                                                                                                                                                                                                           |
| VC_558_39 | MK359364,MT723944,OP297534                                                                                                                                                                                                                                  |
| VC_558_4  | MK359353                                                                                                                                                                                                                                                    |
| VC_558_40 | MN276192                                                                                                                                                                                                                                                    |
| VC_558_41 | MK450424                                                                                                                                                                                                                                                    |
| VC_558_42 | MZ856343                                                                                                                                                                                                                                                    |
| VC_558_43 | MK359337                                                                                                                                                                                                                                                    |
| VC_558_44 | MK359345                                                                                                                                                                                                                                                    |
| VC_558_45 | MK359327                                                                                                                                                                                                                                                    |
| VC_558_46 | MK359349                                                                                                                                                                                                                                                    |
| VC_558_47 | MK112541,MK112545,MK112548                                                                                                                                                                                                                                  |
| VC_558_48 | KF024734,KX721256                                                                                                                                                                                                                                           |
| VC_558_49 | JN624850,KC748968,KX721255,MH779498,MK112554,MK359334,OP068341                                                                                                                                                                                              |
| VC_558_5  | KC691257                                                                                                                                                                                                                                                    |
| VC_558_50 | JQ911768,KJ595575,KM881426,KT321476,MF919499,MH051266,MH316567,MH669008,MH825713,MK359314,MK359365,MK450429,MK450434,OK040789,OP021684                                                                                                                      |
| VC_558_51 | MK112533                                                                                                                                                                                                                                                    |
| VC_558_52 | MH744422                                                                                                                                                                                                                                                    |
| VC_558_53 | MK359306                                                                                                                                                                                                                                                    |
| VC_558_54 | MH779502                                                                                                                                                                                                                                                    |
| VC_558_55 | MF919494                                                                                                                                                                                                                                                    |
| VC_558_56 | MH727558                                                                                                                                                                                                                                                    |
| VC_558_57 | MK450425                                                                                                                                                                                                                                                    |
| VC_558_58 | MZ388551                                                                                                                                                                                                                                                    |
| VC_558_59 | MK359317                                                                                                                                                                                                                                                    |
| VC_558_6  | JF704116,KT365398                                                                                                                                                                                                                                           |



|           |                                                                                                                                                                                                                                                                                                                                                                                                                                                                   |
|-----------|-------------------------------------------------------------------------------------------------------------------------------------------------------------------------------------------------------------------------------------------------------------------------------------------------------------------------------------------------------------------------------------------------------------------------------------------------------------------|
| VC_558_60 | MN183280                                                                                                                                                                                                                                                                                                                                                                                                                                                          |
| VC_558_61 | MH051260,MK359318                                                                                                                                                                                                                                                                                                                                                                                                                                                 |
| VC_558_62 | MK359305                                                                                                                                                                                                                                                                                                                                                                                                                                                          |
| VC_558_63 | JN699626                                                                                                                                                                                                                                                                                                                                                                                                                                                          |
| VC_558_64 | MK359350                                                                                                                                                                                                                                                                                                                                                                                                                                                          |
| VC_558_65 | MK450422,MW291012                                                                                                                                                                                                                                                                                                                                                                                                                                                 |
| VC_558_66 | MK359330                                                                                                                                                                                                                                                                                                                                                                                                                                                          |
| VC_558_67 | OP021682                                                                                                                                                                                                                                                                                                                                                                                                                                                          |
| VC_558_68 | MG812494                                                                                                                                                                                                                                                                                                                                                                                                                                                          |
| VC_558_69 | MK359329                                                                                                                                                                                                                                                                                                                                                                                                                                                          |
| VC_558_7  | MH051261                                                                                                                                                                                                                                                                                                                                                                                                                                                          |
| VC_558_70 | ON456344                                                                                                                                                                                                                                                                                                                                                                                                                                                          |
| VC_558_71 | MK359346                                                                                                                                                                                                                                                                                                                                                                                                                                                          |
| VC_558_72 | MG812493                                                                                                                                                                                                                                                                                                                                                                                                                                                          |
| VC_558_73 | MH697579,MK359359                                                                                                                                                                                                                                                                                                                                                                                                                                                 |
| VC_558_74 | MF919495                                                                                                                                                                                                                                                                                                                                                                                                                                                          |
| VC_558_75 | ON551388                                                                                                                                                                                                                                                                                                                                                                                                                                                          |
| VC_558_76 | MW822148                                                                                                                                                                                                                                                                                                                                                                                                                                                          |
| VC_558_77 | MF919513,MK359308,MN062707                                                                                                                                                                                                                                                                                                                                                                                                                                        |
| VC_558_78 | JN699627                                                                                                                                                                                                                                                                                                                                                                                                                                                          |
| VC_558_79 | MN735434                                                                                                                                                                                                                                                                                                                                                                                                                                                          |
| VC_558_8  | AY129337,JN699013                                                                                                                                                                                                                                                                                                                                                                                                                                                 |
| VC_558_80 | JN412588                                                                                                                                                                                                                                                                                                                                                                                                                                                          |
| VC_558_81 | KX752698                                                                                                                                                                                                                                                                                                                                                                                                                                                          |
| VC_558_82 | GQ303262,KX831080,MF919527                                                                                                                                                                                                                                                                                                                                                                                                                                        |
| VC_558_9  | KF006817,KX781992,MK359324                                                                                                                                                                                                                                                                                                                                                                                                                                        |
| VC_559_0  | EU826466,MF668280                                                                                                                                                                                                                                                                                                                                                                                                                                                 |
| VC_559_1  | MZ820085                                                                                                                                                                                                                                                                                                                                                                                                                                                          |
| VC_563_0  | KJ567043,MK016501                                                                                                                                                                                                                                                                                                                                                                                                                                                 |
| VC_564_0  | MW584155,MW584175,MW584201                                                                                                                                                                                                                                                                                                                                                                                                                                        |
| VC_565_0  | DQ398047,DQ398051,EU676000,FJ168660,FJ168661,FJ168662,JF937107,JN699014,KJ194582,MH025888,MH316562,MH399788,MH834615,MK494102,MK524498,MK559427,MN119378,MN234227,MN284908,MT889385                                                                                                                                                                                                                                                                               |
| VC_566_0  | AY129339,MK279909                                                                                                                                                                                                                                                                                                                                                                                                                                                 |
| VC_567_0  | EU770222,FJ174691,KF986247,KJ567046,MG962376,MH509445,MN010756,MT521996                                                                                                                                                                                                                                                                                                                                                                                           |
| VC_568_0  | JF704112,KF416342,KT591076,KY969628,MH0001447,MH926059,MK757446,MT684602                                                                                                                                                                                                                                                                                                                                                                                          |
| VC_569_0  | JN412589,KR997933,ON108649                                                                                                                                                                                                                                                                                                                                                                                                                                        |
| VC_57_0   | ON470596,ON470604,ON470624,ON470627                                                                                                                                                                                                                                                                                                                                                                                                                               |
| VC_570_0  | KX557285,MH025890,MH271313,MH576972,MT639639,MT771345,MT771348,MZ171372,ON970620                                                                                                                                                                                                                                                                                                                                                                                  |
| VC_571_0  | MG757156,MH834613,MN585993,MT776806                                                                                                                                                                                                                                                                                                                                                                                                                               |
| VC_572_0  | MN234162,MN234190,MN234207,MN234220,MN234232,MN586003,MZ005671,OL455887,OL455890,OL455895,ON755185,ON755187,ON970611,OP172868,OP172870,OP172876                                                                                                                                                                                                                                                                                                                   |
| VC_573_0  | MN813687,ON108643                                                                                                                                                                                                                                                                                                                                                                                                                                                 |
| VC_574_0  | JX901189,KF024728,MK279840,MW460248,MZ152914,OM793623,ON108645                                                                                                                                                                                                                                                                                                                                                                                                    |
| VC_575_0  | AY216660,HM035024,JX912252,KP085586,KU194205,KU194206,KX828710,KY985004,LC516895,MF093736,MF468274,MG049919,MH051911,MH051912,MH285980,MH917278,MK213796,MK335533,MK972831,MN153797,MN296515,MN337573,MN342247,MN393473,MT427400,MT682715,MZ501092,OL770108,OL800706,OL960578,OL960579,OL960582,ON185577,OP094641,OP455115                                                                                                                                        |
| VC_576_0  | MF996376,MH051918,MT023084,MZ501053                                                                                                                                                                                                                                                                                                                                                                                                                               |
| VC_577_0  | AY236756,JN051154,JX486087,MG765275,MG765278,MH809528                                                                                                                                                                                                                                                                                                                                                                                                             |
| VC_578_0  | MG020111,MK504442                                                                                                                                                                                                                                                                                                                                                                                                                                                 |
| VC_580_0  | KC954775,OM638103                                                                                                                                                                                                                                                                                                                                                                                                                                                 |
| VC_581_0  | MW805361                                                                                                                                                                                                                                                                                                                                                                                                                                                          |
| VC_581_1  | OM982621                                                                                                                                                                                                                                                                                                                                                                                                                                                          |
| VC_582_0  | MN184887,MN732867,OP480062,OP480063                                                                                                                                                                                                                                                                                                                                                                                                                               |
| VC_582_1  | OK136180,OK181858,OK181861                                                                                                                                                                                                                                                                                                                                                                                                                                        |
| VC_582_2  | KM190144                                                                                                                                                                                                                                                                                                                                                                                                                                                          |
| VC_582_3  | KT934943,KX452695,KY652726,MG250486,MK024806,MT178275,MT438396,MT939253,MZ602147,ON602729,ON602736,OP296941                                                                                                                                                                                                                                                                                                                                                       |
| VC_582_4  | JN882284,KF550303,MZ311864                                                                                                                                                                                                                                                                                                                                                                                                                                        |
| VC_582_5  | GU070616,JX181824,MW006477,MZ326168                                                                                                                                                                                                                                                                                                                                                                                                                               |
| VC_582_6  | MG969411                                                                                                                                                                                                                                                                                                                                                                                                                                                          |
| VC_584_0  | AY308796,KM236241,KX015770,KX015771,KY657202,KY694971,LR597656,MG241338,MH102284,MH491968,MH729819,MN994500,MT478992,MW021748,MW021750,MW598258,MZ501059,OK499973,OK499984,OL539443,OL539444,OL539461,OL539462,OL539465,OL539466,ON843697,OP292673,OP292674                                                                                                                                                                                                       |
| VC_585_0  | MN019128,MW032452,MZ501077,MZ501085                                                                                                                                                                                                                                                                                                                                                                                                                               |
| VC_585_1  | MK778457,MN090155,MZ501099                                                                                                                                                                                                                                                                                                                                                                                                                                        |
| VC_585_2  | MW689258                                                                                                                                                                                                                                                                                                                                                                                                                                                          |
| VC_585_3  | OM317910                                                                                                                                                                                                                                                                                                                                                                                                                                                          |
| VC_586_0  | MN101222,OK019720,ON045001                                                                                                                                                                                                                                                                                                                                                                                                                                        |
| VC_587_0  | AY320035,KT221034                                                                                                                                                                                                                                                                                                                                                                                                                                                 |
| VC_588_0  | KU958700,MH744420                                                                                                                                                                                                                                                                                                                                                                                                                                                 |
| VC_589_0  | AY324828,MN710383                                                                                                                                                                                                                                                                                                                                                                                                                                                 |
| VC_590_0  | AY343333,EF437941,EU863408,HE978309,KY683735,MF327006,MH560358,MK327932,MK327935,MK327941,MK327947,MK573636,MK962753,MN655998,MN709127,MN850574,MN850615,MN882349,MN894885,MT478991,MT764208,MW748999,MZ504876,MZ504877,MZ504878,ON286974,OX001802                                                                                                                                                                                                                |
| VC_591_0  | CP059058,KP063118,MG030346,MN062188,MN604053,MN840486,MW145139,OK499974,OK499975,OK499986,OK499998,OK500000,OL741431,OM962992                                                                                                                                                                                                                                                                                                                                     |
| VC_592_0  | JN871591,JQ340774,JX094499,JX296113,KC139512,KC139514,KC139515,KC139519,KC677662,KM366098,KM458633,KR296689,KR296691,KU927500,KX452699,KX452700,KX765862,KX765863,KX765864,KY014601,KY620117,LC553736,LR026998,MG280946,MH631453,MH791395,MH791396,MK249308,MK286578,MN871450,MT499897,MT499898,MT675124,MT675125,MT675126,MW057860,MW149272,MW355449,MW355460,MW355467,MW355470,MW355474,MW355476,MW355479,OL606627,OL699877,OM025231,OP453108,OP535471,OP535472 |
| VC_593_0  | KM581061,MH015249,MH015252,MH015254,MH015258                                                                                                                                                                                                                                                                                                                                                                                                                      |
| VC_594_0  | KT321316,OK041469                                                                                                                                                                                                                                                                                                                                                                                                                                                 |
| VC_597_0  | MK838113,MN317029,MT952005,MW978786,OL840901,OL964754                                                                                                                                                                                                                                                                                                                                                                                                             |
| VC_598_0  | HQ632859,KY249644,MF476925,MW269554                                                                                                                                                                                                                                                                                                                                                                                                                               |
| VC_599_0  | AY370762,AY388628,AY423772,EU030938,EU030939,FJ870915,FJ870916,FJ870917,KC618393,KY563228,KY579375,MK054204,MK054205,MK054206,MK054207,MK054209,MK054210,MK054211,MK054212,MK054213,MK054214,MK054215,MK054216,MK054217,MK054218,MK054219,MK054220,MK054221,MK054222,MK054223,MK054224,MK054225,MK054226,MK054227,MK054228,MK054229,MK054230,MK054231,MK054232,MK054233,MK054234,MK054235,MK054236,MK054237,MN496305,MN496306,MN496307,MN496308,X07234            |



VC\_6\_0 AY319521,CP019275,CP025900,HM770079,KT630647,KY271398,MK416009,MK416011,MK416012,MK416020,MK422449,MK422453,MK422454,MK433577,MK433578,MK433580,MK433581,MK433582,OK490395,OK490397,OK490399,OK490401,OK490403,OK490405,OK490407,OK490411,OK490413,OK490418,OK490423,OK490425,OK490427,OK490429,OK490431,OK490434,OK490436,OK490439,OK490442,OK490445,OK490448,OK490452,OK490455,OK490457,OK470620,OV696611  
VC\_60\_0 OK490460,OK490463,OK490466,OK490469,OK490472  
VC\_600\_0 MK577502,MN871507,ON042478  
VC\_600\_1 AY375531,AY962392,KY290948,KY290951,KY290956,KY290957,KY290958  
VC\_600\_2 DQ529280,HM452125,JN377894,JN377895,JX306041,MF479730,MH179476,MH179477,MW584871,OL840900  
VC\_602\_0 JN190960,MW677528  
VC\_603\_0 AY441783,AY848684,AY848685,AY848686,AY848687,AY848688,AY848689,OK041468,OM630588  
VC\_604\_0 KR093634,KR093635,KR093636,KR093637,KR093639,KR093640,KR093641,KR093642,KR093643,KR093644,KR093645,KR093646,KR093647,KR093648,KR093649,KR093650,KR093651,KR093652,KR093653,KR093654,KR093655,KR093656  
VC\_607\_0 AY505112,AY510084,JF712866,KM612259,KM612260,KM612261,KM612262,KM612263,KM612264,KM612265,KY883642,KY883647,KY883656,MH105773,MW824387,MW824404  
VC\_608\_0 MG674163,MT992243,MW176032,MW176034,MW590698  
VC\_609\_0 MF074189,MW202496,MW202711,MW202879  
VC\_61\_0 AB334720,AB334721,F1CCG,GQ153916,GQ153917,GQ153918,GQ153919,JF719732,JF719733,JF719734,JX412914,PFDCG  
VC\_611\_0 AY569307,GU080336  
VC\_612\_0 AY575774,DQ163914,KU884561,KU884562,KU884563,KU884564,KU884565,MK514283,ON857941  
VC\_613\_0 AY569307,GU080336  
VC\_614\_0 AY575774,DQ163914,KU884561,KU884562,KU884563,KU884564,KU884565,MK514283,ON857941  
VC\_615\_0 JF412296,OM519319  
VC\_618\_0 KX198614,MT795651,MW114771,ON457558,ON457559  
VC\_619\_0 CAKLQA020000003,MZ326864  
VC\_620\_0 JX128258,MH051335,MH816966,MK373776,MK373777,MK903282,MN038177,MN176217,MT446405,MT446408,OL856099,ON210137,OP352608  
VC\_622\_0 KT361654,KT361655,KT361657,OP494865,OP503543,OP503968,OP503969,OP503970,OP503971,OP503972,OP503973,OP503974,OP503975,OP503976,OP503977,OP503978,OP503979,OP503980,OP503981,OP503982,OP503983,OP503984,OP503985,OP503986,OP503987,OP503988  
VC\_623\_0 MF176161,MH884512  
VC\_625\_0 MK448818  
VC\_63\_0 MK448890,MK448930  
VC\_630\_0 AP009146,DQ785801  
VC\_631\_0 AY625898,KC262634,KC900378,L7603684,MF490237,MK511039,MK511040,MK511041,MK511042,MK511043,MK511044,MK511045,MK511046,MK511047,MK511048,MK511049,MK511050,MK511051,MT118301,MZ285879  
VC\_632\_0 MT152150,MT491207,MT491208  
VC\_634\_0 FM864213,JN997652,KC348603,KC581799,KT336320,KT336321,KX077896,MK359990,MK448674,MK448741,MK448752,MK448811,MK448819,MK448828,MK448983,MN270258,MN270259,MN270260,MN270261,MN270262,MN270263,MN270264,MN270265,MN270266,MN270267,MN270268,MN270269,  
VC\_634\_1 MN270270,MN270271,MN270272,MN270273,MN270274,MN270275,MN270276,MN270277,MN270278,MN270279  
VC\_636\_0 KU052488,MG252693,MG765276  
VC\_637\_0 JX486088,KX223815,KY381600,MG744354,MG765274,ON117106  
VC\_637\_1 KM289195,MK448681,MK448683,MK448783,MK448790,MK448798,MK448833,MK448967,MK449010  
VC\_637\_2 AY730274,EF177456,HE775250,HG934469,HG934470,JQ007353,JX202565,KC139511,KR270151,KT881477,KT962832,KU595434,KU951146,KU951147,KX245013,KX405002,KX649889,KY379853,KY626163,LC507823,MF001356,MF001366,MF431252,MG646668,MG969408,MG969409,MG969410,MH35835  
VC\_638\_0 9,MH370358,MH370359,MH370360,MH370361,MH370362,MH370363,MH370365,MH370372,MH370373,MH370374,MH370381,MH370384,MH370385,MH424443,MH424445,MH992509,MK249126,MK761195,MK761196,MK761197,MK761198,MK761199,MK770409,MK972691,MK972700,MK972701,MK972702,MK972703,MK972705,MK972706,MN336265,MN336266,MN393078,MN722429,MN850616,MT074431,MT074432,MT074433,MT074462,MT074473,MT074481,MT074482,MT074483,MT074484,MT588083,MT632017,MT632018,MT632019,MT632020,MT653137,MT653144,MT677934,MT7402  
VC\_638\_1 91,MW201959,MW355463,MW355464,MW355465,MW715619,MW790495,MZ156567,MZ156568,MZ156569,MZ274225,MZ2955866,OK108608,OK108609,OK143508,OL436139,OL519843,OL652658,OL770276,OM210019,OM291373,OM339548,ON167532,ON381768,ON409568,ON409569,ON409570,ON45403  
VC\_638\_2 8,ON526838,ON540301,ON720977,ON96339,OP484850,OP494211  
VC\_639\_0 JX297445,KF562864,KF562865,KY176369,MK578530,MK759883,MK931446,MT074430,MT677933,MW355451,MW355452,MW355453,MW355454,MW355455,MW355456,MW355457,MW355458,MW355459,MW355461,MW355462,MW355466,MW355468,MW355469,MW355472,MW355473,O  
VC\_639\_1 K169616  
VC\_639\_2 KFI48055,KM272358  
VC\_639\_3 GU196277,GU196278,GU196279,GU196280,GU196281,KY295895,KY295896,KY295898,MF153391,MG099933,MG252615,MG852086,MH051334,MK542015,MK737937,MK931438,MK931439,MK931440,MK931441,MN927225,MN927226,MT711523,MT711524,MT711525,MT711526,MT711527,MT711528,M  
VC\_640\_0 W331437,MW722821,MZ234010,MZ234048,MZ576217,MZ576218,MZ832314,MZ997838,OK539620,OL539727,OM272052,OM632667,OM632668,OM810255,ON001686,ON391668,ON548432,ON556632  
VC\_640\_1 MK813940,OM033133  
VC\_642\_0 JN022534,MK798143,MK798144  
VC\_642\_1 AY739900,EU340421,KF188410,KJ564036,KJ564037,KJ564038,MG913376  
VC\_642\_2 HQ632860,MG592506,MG592545,MG592567,MG592568,MG592600,MG592630  
VC\_642\_3 OX241574  
VC\_642\_4 AY772740,JP974313,MG676223,MK097141,ON714422,OP375635  
VC\_643\_0 KX507045,MG592494,MG592501,MG592508,MG592514,MG592583,MG592587,MG592595,MG592644  
VC\_643\_1 MW824412,MW824413  
VC\_644\_0 MG592544,MG592664,MG592665,OX241573  
VC\_645\_0 JF974287,MK249872  
VC\_646\_0 KC542353,KP994596,KU747973,MK387309,MN313256  
VC\_647\_0 MG592390,MG592420,MG592423,MG592439,MG592444,MG592454,MG592465,MG592466  
VC\_648\_0 MG592393,MG592477,MG592478,MG592518,MG592540,MG592552,MG592569,MG592570,MG592608,MG592614,MG592622,MG592627,MG592628,MG592641,MG592647,MG592656,MW824369,MW824373,MW824374,MW824378,MW824379,MW824383,OX241429,OX241438,OX241498,OX241557,OX241  
VC\_649\_0 558,OX241575,OX241591  
VC\_65\_0 CP069347,HG796225,HG798901,JX145342,LK985321,LN681538,LN681540,MK473382,MT193276,MW512571,MW512572  
VC\_65\_1 KM983328,KM983331,KM983334  
VC\_652\_0 MT366760,MT366761  
VC\_654\_0 EU874396,GU229986,KX227758,KX227759  
VC\_655\_0 KT725776,KX227757,KX227760,MW302330  
VC\_655\_1 GU071099,MH512890  
VC\_655\_2 GU071103  
VC\_655\_3 AY940168,HQ337021,HQ634176  
VC\_655\_4 HQ634175  
VC\_655\_5 JN371769  
VC\_655\_6 KU686207,KU686208,KU686209  
VC\_655\_7 GU071106,HQ634190  
VC\_655\_8 HQ634189,MH920639,MH920640  
VC\_655\_9 GU071094  
VC\_656\_0 GU071097  
VC\_656\_1 HQ316583,HQ316603  
VC\_657\_0 KJ019028,KJ019029,KJ019031,KJ019032,KJ019034,KJ019035,KJ019036,KJ019046,KJ019047,KJ019048,KJ019050,KJ019056,KJ019057,KJ019062,KJ019070,KJ019072,KJ019073,KJ019074,KJ019075,KJ019077,KJ019078,KJ019079,KJ019080,KJ019083,KJ019112,KJ019113,KJ019115,KJ019117,KJ019118,KJ019119,  
VC\_657\_1 KJ019120,KJ019121,KJ019124,KJ019125,KJ019126,KJ019127,KJ019129,KJ019130,KJ019131,KJ019136,KJ019139,KJ019140,KJ019160,KJ019162,KJ019164,KJ019165  
VC\_657\_2 KU686212,KU686213,MT586120  
VC\_657\_3 KJ019037,KJ019045,KJ019052,KJ019053,KJ019058,KJ019059,KJ019066,KJ019085,KJ019086,KJ019090,KJ019091,KJ019092,KJ019093,KJ019095,KJ019096,KJ019097,KJ019098,KJ019099,KJ019100,KJ019101,KJ019102,KJ019103,KJ019105,KJ019106,KJ019107,KJ019111,KJ019123,KJ019141,KJ019142,KJ019143,  
VC\_657\_4 KJ019144,KJ019145,KJ019146,KJ019147,KJ019148,KJ019149,KJ019150,KJ019151,KJ019152,KJ019155,KJ019159



VC\_659\_0 MH319737,MH319746  
VC\_66\_0 MK552140,MK552141  
VC\_66\_1 MN094788  
VC\_66\_2 MW460245  
VC\_66\_3 AB366653  
VC\_662\_0 HQ317290,HQ317291,HQ317292,KX349226,KX349227,KX349228,KX349229,KX349230,KX349231,KX349232,KX349233,KX349234,KX349235,KX349236,KX349237,KX349238,KX349239,KX349240,KX349241,KX349242,KX349243,KX349244,KX349245,KX349246,KX349247,KX349248,KX349249,KX349250,KX349251,KX349252,KX349253,KX349254,KX349255,KX349256,KX349257,KX349258,KX349259,KX349260,KX349261,KX349262,KX349263,KX349264,KX349265,KX349266,KX349267,KX349268,KX349269,KX349270,KX349271,KX349272,KX349273,KX349274,KX349275,KX349276,KX349277,KX349278,KX349279,KX349280,KX349281,KX349282,KX349283,KX349284  
VC\_664\_0 JQ245707,OP053360,OP053361,OP053362  
VC\_666\_0 AY950802,JN968479,KC252997,KT809302  
VC\_667\_0 KFP929199,KJ804259,MT596499,MZ417336,MZ417339,MZ417343,MZ417348  
VC\_667\_1 MH356730  
VC\_667\_2 MK893987  
VC\_668\_0 GU295964,HQ918180,KT001918,KT001919,KT321315,KX130727,LR746310,LT607758,MN101223,MT157285,MW448170,MZ322895,MZ612130,MZ707156,MZ707157,OK631812,OK631813,OM103621,OM971648,OM971649,ON515458,OP045497,OP684128,OX335396,OX335407  
VC\_668\_1 OP617746  
VC\_668\_2 MN101221  
VC\_668\_3 MN101224  
VC\_669\_0 JN882287,KT381880,KX431559,KX431560,KX443552,LC589952,MH823906,MN508621,MN508622,MN508623,MN508624,MT341500,MW021751,MW021756,MW250785,MW629017,MW767161,OL539470,OL539471,OL551674,ON157416  
VC\_669\_1 AY967407,HE858210,HE981739,HM134276,KC801932,KM236237,KR869820,KX245890,MT334653,MW021749  
VC\_669\_2 MN508817  
VC\_669\_3 MN038175  
VC\_669\_4 OK210075  
VC\_669\_5 MT560058  
VC\_67\_0 KY448244,MW366843  
VC\_67\_1 MZ475891,MZ475892,MZ475893,MZ475894,MZ475895,MZ475896,MZ475897,MZ475898  
VC\_67\_2 KY984068,MZ443769  
VC\_67\_3 MH248138,MH460463,MZ443770,MZ443771,MZ443772,MZ443773,MZ443774,MZ443776,MZ443777,MZ443778,MZ443779,MZ443780,MZ443782,MZ443783,MZ443784,MZ443785,MZ443786,MZ443787,MZ443788,MZ443789  
VC\_67\_4 MH389777,MH460460,MH460461,MH460462  
VC\_67\_5 LT598654  
VC\_670\_0 CAKLQA020000002,MW176033  
VC\_671\_0 MN937349,MW393850,MZ326859,MZ398240,MZ398241  
VC\_672\_0 BCP1,MG883715,MG883725,MC945215,MC945341,MC945520,MC945686,MC945756,MT135344,MT135404,MT135412  
VC\_673\_0 BK010471,MH552500,MH616963,MK069403,MK238400,MT006214,MT774381,MT774383,MT774384,MT774386,MT774394,MW067000,MW067001,MW067002,MW067003  
VC\_68\_0 AP018399  
VC\_68\_1 MN047793  
VC\_681\_0 BK013345,BK013346,BK013347  
VC\_682\_0 BK059895,OM373202  
VC\_683\_0 BK061308,BK061309,BK061310,BK061311,BK061312  
VC\_684\_0 MW353181,MW584168,MW584172,MW584178,MW584190  
VC\_685\_0 MG872834,MH513979,MH651167,MK284520,MK433274,MK433275,MK820641,MN062715,MT521999,MW534378,MW601219,MZ322028,MZ622161,MZ622165,ON108651,OP434460  
VC\_686\_0 MK494099,ON260818  
VC\_686\_1 KU728633,MK977701  
VC\_687\_0 KFI14879,KFI14880,KX656785  
VC\_687\_1 KFI14876,KFI14877  
VC\_688\_0 MP974396,MP974397  
VC\_689\_0 DQ490056,MW791312  
VC\_690\_0 C2PVCG,KX373685,KX373686,KX373687,KX373688,KX373689,KX373690,KX373691,KX373692,L67CG,MF443119,MF443120,MF443121,MF443122,MF443123,MF443124,MF443125,MF443126,MH779518,MH779519,MH779520,MH779521,MH779522,MH779523,MH779524,MH779525,MH779526,MH779527,MK301442,MK301443,MN337887,MN689503,MN689504,MN689505,MN689506,MN689507,MN689508,MN689510,MN689511,MN689512,MN689513,MN689515,MN689526,MN689527,MN689528,MN689529,MN689531,MN689532,MN689533,MZ955869  
VC\_691\_0 MT939241,ON506926  
VC\_691\_1 CAJJCZ010000002,LT546029,LT615366,MT119360,MT119361  
VC\_692\_0 MF001358,MF001361  
VC\_694\_0 MW672041  
VC\_695\_0 CAJDJX010000002,CAJDKF010000002,JX193904,KF728385,KF733017,KJ127304,KR131750,KT932701,KX284704,LC623721,MF678788,MF678789,MF678790,MG264739,MG708276,MH193369,MH203383,MH203384,MH355583,MH375074,MK125140,MK360024,MK721186,MK721187,MK721190,MK721191,MK721199,MK721200,MK982307,MT119359,MT520979,MT627482,MT661597,MT661598,MT829326,MT857001,MZ182246,MZ2272341,MZ326865,MZ333461,OL505084,OL539449,OL799256,OL799257,ON113176,ON113334,OP254195,OP559177  
VC\_696\_0 KTS88075,MZ514874  
VC\_696\_1 CAKLQA020000001,JX403940,KP861230,KT588073,MH115576,MT361972,MZ675741,ON391949  
VC\_697\_0 KJ507100,MT104473,MT104475,MZ348425,MZ868718  
VC\_698\_0 HE806280,HM368260,JX976549,KJ817802,KP861229,KP861231,KU510289,KY670595,KY829116,MF346584,MH853786,MH853787,MH853788,MN166083,MN516421,MN516422,MZ593728,MZ618622,MZ712044,OL743187,OM471864,ON036882,ON036883,ON237674,ON480525,OP585104  
VC\_699\_0 CAKLQB020000001,CAKLQ0020000001,HQ186308,JX658790,KC311669,KR149290,KT339321,KT388102,KT388103,KT804908,KY082667,KY268295,KY268296,KY888680,MF033347,MF033348,MF033349,MF033350,MF033351,MG459218,MG599035,MH042230,MH763831,MH800200,MK089780,MK257719,MK257720,MK257721,MK257722,MK257723,MK278859,MN061582,MN212906,MN294712,MN395291,MN433707,MN604238,MN604239,MN614471,MN651570,MN807295,MT263719,MT633129,MT741944,MW056501,MW056502,MW056503,MW345241,MW366783,MW366784,MW459163,MW926912,MZ099557,MZ593174,MZ868724,MZ868725,MZ868726,MZ936314,MZ936315,MZ936316,MZ967493,OK546191,OL770263,OL964948,OM925528,ON210142,ON513429,OP019135,OP171942,OP291336,OP508218  
VC\_70\_0 AB000986,AB044554,AB243556,AF424783,CP062426,CP062435,CP062445,CP062457,EF462197,EF462199,FF713816,GQ915271,KC342645,KX232515,KY389063,KY389064,KY653125,KY695153,MH384260,MH401414,MH401415,MW147366,MW192778,MW627293,MW650841,OM439664,OP136133,OP493557  
VC\_70\_0 AB920995,AB983711,GU393987,HG793132,HG796219,HG796220,HG796221,KC853746,KT381879,KO660669,KY316062,KY464836,KY981272,MF621978,MH684921,MN191861,MT740728,MZ326863,OK319016,OK335783,ON170174,ON170178,ON170184,ON170185,ON170318,ON170358,ON529868  
VC\_700\_0 KJ628499,MH746814,MH800198,MH800199,MK170160,MT188223,MT623546,MW349133,OL960030,OP585105  
VC\_700\_1 KJ473422  
VC\_701\_0 MN276049,MZ477002  
VC\_701\_1 MH133207,MZ043613  
VC\_701\_2 CAKLQE020000001  
VC\_702\_0 KM672662,KY000079,MW316731,MW316732,MW316733  
VC\_704\_0 DQJ150593,DQ222851,DQ222853,DQ222855,DQ289555,DQ289556,DQ289557,DQ289558,DQ289559,DQ289560,DQ289561,DQ289562,DQ289563,DQ289564,DQ289565,DQ289566,DQ289567,DQ289568,DQ289569,DQ289570,DQ289571,DQ289572,DQ289573,DQ289574,DQ289575,DQ289576,DQ289577,DQ289578,DQ289579,DQ289580,DQ289581,DQ289582,DQ289583,DQ289584,DQ289585,DQ289586,DQ289587,DQ289588,DQ289589,DQ289590,DQ289591,DQ289592,DQ289593,DQ289594,DQ289595,DQ289596,DQ289597,DQ289598,DQ289599,DQ289600,DQ289601,DQ289602,DQ289603,DQ289604,DQ289605,DQ289606,DQ289607,DQ289608,DQ289609,DQ289610,DQ289611,DQ289612,DQ289613,DQ289614,DQ289615,DQ289616,DQ289617,DQ289618,DQ289619,DQ289620,DQ289621,DQ289622,DQ289623,DQ289624,DQ289625,DQ289626,DQ289627,DQ289628,DQ289629,DQ289630,DQ289631,DQ289632,DQ289633,DQ289634,DQ289635,DQ289636,DQ289637,DQ289638,DQ289639,DQ289640,DQ289641,DQ289642,DQ289643,DQ289644,DQ289645,DQ289646,DQ289647,DQ289648,DQ289649,DQ289650,DQ289651,DQ289652,DQ289653,DQ289654,DQ289655,DQ289656,DQ289657,DQ289658,DQ289659,DQ289660,DQ289661,DQ289662,DQ289663,DQ289664,DQ289665,DQ289666,DQ289667,DQ289668,DQ289669,DQ289670,DQ289671,DQ289672,DQ289673,DQ289674,DQ289675,DQ289676,DQ289677,DQ289678,DQ289679,DQ289680,DQ289681,DQ289682,DQ289683,DQ289684,DQ289685,DQ289686,DQ289687,DQ289688,DQ289689,DQ289690,DQ289691,DQ289692,DQ289693,DQ289694,DQ289695,DQ289696,DQ289697,DQ289698,DQ289699,DQ289700,DQ289701,DQ289702,DQ289703,DQ289704,DQ289705,DQ289706,DQ289707,DQ289708,DQ289709,DQ289710,DQ289711,DQ289712,DQ289713,DQ289714,DQ289715,DQ289716,DQ289717,DQ289718,DQ289719,DQ289720,DQ289721,DQ289722,DQ289723,DQ289724,DQ289725,DQ289726,DQ289727,DQ289728,DQ289729,DQ289730,DQ289731,DQ289732,DQ289733,DQ289734,DQ289735,DQ289736,DQ289737,DQ289738,DQ289739,DQ289740,DQ289741,DQ289742,DQ289743,DQ289744,DQ289745,DQ289746,DQ289747,DQ289748,DQ289749,DQ289750,DQ289751,DQ289752,DQ289753,DQ289754,DQ289755,DQ289756,DQ289757,DQ289758,DQ289759,DQ289760,DQ289761,DQ289762,DQ289763,DQ289764,DQ289765,DQ289766,DQ289767,DQ289768,DQ289769,DQ289770,DQ289771,DQ289772,DQ289773,DQ289774,DQ289775,DQ289776,DQ289777,DQ289778,DQ289779,DQ289780,DQ289781,DQ289782,DQ289783,DQ289784,DQ289785,DQ289786,DQ289787,DQ289788,DQ289789,DQ289790,DQ289791,DQ289792,DQ289793,DQ289794,DQ289795,DQ289796,DQ289797,DQ289798,DQ289799,DQ289800,DQ289801,DQ289802,DQ289803,DQ289804,DQ289805,DQ289806,DQ289807,DQ289808,DQ289809,DQ289810,DQ289811,DQ289812,DQ289813,DQ289814,DQ289815,DQ289816,DQ289817,DQ289818,DQ289819,DQ289820,DQ289821,DQ289822,DQ289823,DQ289824,DQ289825,DQ289826,DQ289827,DQ289828,DQ289829,DQ289830,DQ289831,DQ289832,DQ289833,DQ289834,DQ289835,DQ289836,DQ289837,DQ289838,DQ289839,DQ289840,DQ289841,DQ289842,DQ289843,DQ289844,DQ289845,DQ289846,DQ289847,DQ289848,DQ289849,DQ289850,DQ289851,DQ289852,DQ289853,DQ289854,DQ289855,DQ289856,DQ289857,DQ289858,DQ289859,DQ289860,DQ289861,DQ289862,DQ289863,DQ289864,DQ289865,DQ289866,DQ289867,DQ289868,DQ289869,DQ289870,DQ289871,DQ289872,DQ289873,DQ289874,DQ289875,DQ289876,DQ289877,DQ289878,DQ289879,DQ289880,DQ289881,DQ289882,DQ289883,DQ289884,DQ289885,DQ289886,DQ289887,DQ289888,DQ289889,DQ289890,DQ289891,DQ289892,DQ289893,DQ289894,DQ289895,DQ289896,DQ289897,DQ289898,DQ289899,DQ289900,DQ289901,DQ289902,DQ289903,DQ289904,DQ289905,DQ289906,DQ289907,DQ289908,DQ289909,DQ289910,DQ289911,DQ289912,DQ289913,DQ289914,DQ289915,DQ289916,DQ289917,DQ289918,DQ289919,DQ289920,DQ289921,DQ289922,DQ289923,DQ289924,DQ289925,DQ289926,DQ289927,DQ289928,DQ289929,DQ289930,DQ289931,DQ289932,DQ289933,DQ289934,DQ289935,DQ289936,DQ289937,DQ289938,DQ289939,DQ289940,DQ289941,DQ289942,DQ289943,DQ289944,DQ289945,DQ289946,DQ289947,DQ289948,DQ289949,DQ289950,DQ289951,DQ289952,DQ289953,DQ289954,DQ289955,DQ289956,DQ289957,DQ289958,DQ289959,DQ289960,DQ289961,DQ289962,DQ289963,DQ289964,DQ289965,DQ289966,DQ289967,DQ289968,DQ289969,DQ289970,DQ289971,DQ289972,DQ289973,DQ289974,DQ289975,DQ289976,DQ289977,DQ289978,DQ289979,DQ289980,DQ289981,DQ289982,DQ289983,DQ289984,DQ289985,DQ289986,DQ289987,DQ289988,DQ289989,DQ289990,DQ289991,DQ289992,DQ289993,DQ289994,DQ289995,DQ289996,DQ289997,DQ289998,DQ289999,DQ290000,DQ290001,DQ290002,DQ290003,DQ290004,DQ290005,DQ290006,DQ290007,DQ290008,DQ290009,DQ290010,DQ290011,DQ290012,DQ290013,DQ290014,DQ290015,DQ290016,DQ290017,DQ290018,DQ290019,DQ290020,DQ290021,DQ290022,DQ290023,DQ290024,DQ290025,DQ290026,DQ290027,DQ290028,DQ290029,DQ290030,DQ290031,DQ290032,DQ290033,DQ290034,DQ290035,DQ290036,DQ290037,DQ290038,DQ290039,DQ290040,DQ290041,DQ290042,DQ290043,DQ290044,DQ290045,DQ290046,DQ290047,DQ290048,DQ290049,DQ290050,DQ290051,DQ290052,DQ290053,DQ290054,DQ290055,DQ290056,DQ290057,DQ290058,DQ290059,DQ290060,DQ290061,DQ290062,DQ290063,DQ290064,DQ290065,DQ290066,DQ290067,DQ290068,DQ290069,DQ290070,DQ290071,DQ290072,DQ290073,DQ290074,DQ290075,DQ290076,DQ290077,DQ290078,DQ290079,DQ290080,DQ290081,DQ290082,DQ290083,DQ290084,DQ290085,DQ290086,DQ290087,DQ290088,DQ290089,DQ290090,DQ290091,DQ290092,DQ290093,DQ290094,DQ290095,DQ290096,DQ290097,DQ290098,DQ290099,DQ290100,DQ290101,DQ290102,DQ290103,DQ290104,DQ290105,DQ290106,DQ290107,DQ290108,DQ290109,DQ290110,DQ290111,DQ290112,DQ290113,DQ290114,DQ290115,DQ290116,DQ290117,DQ290118,DQ290119,DQ290120,DQ290121,DQ290122,DQ290123,DQ290124,DQ290125,DQ290126,DQ290127,DQ290128,DQ290129,DQ290130,DQ290131,DQ290132,DQ290133,DQ290134,DQ290135,DQ290136,DQ290137,DQ290138,DQ290139,DQ290140,DQ290141,DQ290142,DQ290143,DQ290144,DQ290145,DQ290146,DQ290147,DQ290148,DQ290149,DQ290150,DQ290151,DQ290152,DQ290153,DQ290154,DQ290155,DQ290156,DQ290157,DQ290158,DQ290159,DQ290160,DQ290161,DQ290162,DQ290163,DQ290164,DQ290165,DQ290166,DQ290167,DQ290168,DQ290169,DQ290170,DQ290171,DQ290172,DQ290173,DQ290174,DQ290175,DQ290176,DQ290177,DQ290178,DQ290179,DQ290180,DQ290181,DQ290182,DQ290183,DQ290184,DQ290185,DQ290186,DQ290187,DQ290188,DQ290189,DQ290190,DQ290191,DQ290192,DQ290193,DQ290194,DQ290195,DQ290196,DQ290197,DQ290198,DQ290199,DQ290200,DQ290201,DQ290202,DQ290203,DQ290204,DQ290205,DQ290206,DQ290207,DQ290208,DQ290209,DQ290210,DQ290211,DQ290212,DQ290213,DQ290214,DQ290215,DQ290216,DQ290217,DQ290218,DQ290219,DQ290220,DQ290221,DQ290222,DQ290223,DQ290224,DQ290225,DQ290226,DQ290227,DQ290228,DQ290229,DQ290230,DQ290231,DQ290232,DQ290233,DQ290234,DQ290235,DQ290236,DQ290237,DQ290238,DQ290239,DQ290240,DQ290241,DQ290242,DQ290243,DQ290244,DQ290245,DQ290246,DQ290247,DQ290248,DQ290249,DQ290250,DQ290251,DQ290252,DQ290253,DQ290254,DQ290255,DQ290256,DQ290257,DQ290258,DQ290259,DQ290260,DQ290261,DQ290262,DQ290263,DQ290264,DQ290265,DQ290266,DQ290267,DQ290268,DQ290269,DQ290270,DQ290271,DQ290272,DQ290273,DQ290274,DQ290275,DQ290276,DQ290277,DQ290278,DQ290279,DQ290280,DQ290281,DQ290282,DQ290283,DQ290284,DQ290285,DQ290286,DQ290287,DQ290288,DQ290289,DQ290290,DQ290291,DQ290292,DQ290293,DQ290294,DQ290295,DQ290296,DQ290297,DQ290298,DQ290299,DQ290300,DQ290301,DQ290302,DQ290303,DQ290304,DQ290305,DQ290306,DQ290307,DQ290308,DQ290309,DQ290310,DQ290311,DQ290312,DQ290313,DQ290314,DQ290315,DQ290316,DQ290317,DQ290318,DQ290319,DQ290320,DQ290321,DQ290322,DQ290323,DQ290324,DQ290325,DQ290326,DQ290327,DQ290328,DQ290329,DQ290330,DQ290331,DQ290332,DQ290333,DQ290334,DQ290335,DQ290336,DQ290337,DQ290338,DQ290339,DQ290340,DQ290341,DQ290342,DQ290343,DQ290344,DQ290345,DQ290346,DQ290347,DQ290348,DQ290349,DQ290350,DQ290351,DQ290352,DQ290353,DQ290354,DQ290355,DQ290356,DQ290357,DQ290358,DQ290359,DQ290360,DQ290361,DQ290362,DQ290363,DQ290364,DQ290365,DQ290366,DQ290367,DQ290368,DQ290369,DQ290370,DQ290371,DQ290372,DQ290373,DQ290374,DQ290375,DQ290376,DQ290377,DQ290378,DQ290379,DQ290380,DQ290381,DQ290382,DQ290383,DQ290384,DQ290385,DQ290386,DQ290387,DQ290388,DQ290389,DQ290390,DQ290391,DQ290392,DQ290393,DQ290394,DQ290395,DQ290396,DQ290397,DQ290398,DQ290399,DQ290400,DQ290401,DQ290402,DQ290403,DQ290404,DQ290405,DQ290406,DQ290407,DQ290408,DQ290409,DQ290410,DQ290411,DQ290412,DQ290413,DQ290414,DQ290415,DQ290416,DQ290417,DQ290418,DQ290419,DQ290420,DQ290421,DQ290422,DQ290423,DQ290424,DQ290425,DQ290426,DQ290427,DQ290428,DQ290429,DQ290430,DQ290431,DQ290432,DQ290433,DQ290434,DQ290435,DQ290436,DQ290437,DQ290438,DQ290439,DQ290440,DQ290441,DQ290442,DQ290443,DQ290444,DQ290445,DQ290446,DQ290447,DQ290448,DQ290449,DQ290450,DQ290451,DQ290452,DQ290453,DQ290454,DQ290455,DQ290456,DQ290457,DQ290458,DQ290459,DQ290460,DQ290461,DQ290462,DQ290463,DQ290464,DQ290465,DQ29046



VC\_718\_0 KP137433,KP137435,KP137437,KP137439  
VC\_72\_0 JN882298,MG201401  
VC\_720\_0 KT151955,KT151957  
VC\_720\_1 CP027117  
VC\_721\_0 CP045566,MN890136,MN890137,MN890138,MN890139,MN890140,MN890141,MN890142,MN890143  
VC\_722\_0 KJ419279,KP719132,KP719133,KP719134,KY926791,MK165087,MK373794,MK373795,MT682705,MZ501057,MZ501068,OM386652,ON922918  
VC\_723\_0 CP053388,CP054387,CP058330,CP101890,CP101896,JQ965645,MK422451,MZ779062,OV696614  
VC\_724\_0 MT770738,MT778838,MW960030  
VC\_724\_1 JX483881,MN988505,MN988506,MN988543,MN988547,MN988548  
VC\_725\_0 MG018927,MT354569,OM140839,OM223115  
VC\_726\_0 JN116824,KR053195,MH153804  
VC\_727\_0 JX182371,KY092479,KY092480,KY092481,KY092482,KY092483,KY092484,KY676784,MH825699,MK305888,MT7111975  
VC\_728\_0 MK279841,MT316461,MT723933  
VC\_730\_0 CP060690,HQ377372,HQ377373,JF773396,KX879601,KX879602,KY661963,MT899443,MT899444  
VC\_731\_0 KX190833,MK759918  
VC\_733\_0 HM568888,KU057941,LN681535,LN681536,LN881738  
VC\_739\_0 DQ003638,DQ004855,JQ797329,JX126918,KJ094029,KJ094030,KJ094031,KJ094033,KJ535721,KJ535722,KJ586794,KJ586795,KJ591604,KJ591605,KJ668715,KM373208,MK792752,MN128594,MN172529,MN939539,MN939540,MT178766,MT178767,MT438761,MT668623,MT668624  
VC\_74\_0 KP626667,KU197013,KU595432,KU595433,LR778216,MF375456,MK903278,MN478375,OK258138,OK275495,ON911539,ON932078,ON932081,ON932083,ON960072  
VC\_740\_0 DQ003641,EU855793,GQ403788  
VC\_743\_0 DQ079870,DQ079871,DQ079872,DQ079873,DQ079874,DQ079875,DQ079876,DQ079877,DQ079878,DQ079879,DQ085810,GQ149088,MG945254,MK629527,X60322,X60323  
VC\_745\_0 MT006233,MT006238,MT006239,MT006240  
VC\_747\_0 DQ163912,KJ959591,KY707339,MK510962,MK510963,MK510964,MK510965,MK510968,MK510969,MK510970,MK510971,MK510974,MK510975,MK510976,MK510978,MK510984,MK510985,MK510986,MK510987,MK510988,MK510989,MK510993  
VC\_748\_0 MK510966,MK510967,MK510972,MK510973,MK510977,MK510979,MK510980,MK510981,MK510982,MK510983,MK510989,MK510991  
VC\_749\_0 DQ163913,HJ0962376,JF939047,JQ067092,JQ307387,KM434185,KR537871,KR537872,KR935213,KR935215,KU197014,LC552830,LR743530,MG897800,MK165657,MK165658,MK574078,MN062187,MT118304,MT118305,MW512832,MW677514,MW677526,MZ501266,MZ927745,MZ927746,OK094665,OK330455,OK330456,OK539825,OL802211,OM234791,ON189042,ON189043,ON189044,ON911538,ON932082,ON932085,OP009282,OP422637  
VC\_75\_0 MZ666965,MZ666966  
VC\_750\_0 MG366115  
VC\_751\_0 KP313532,MK962635,MK962636,MK962637  
VC\_752\_0 MN734437,MN734438,MN734439  
VC\_754\_0 HQ641345,HQ641346,KM224878,KM224879,KY883657,KY883658,MT066160,MT767883  
VC\_755\_0 DQ163915,KU535860,LT986460,MF788075,MG676466,MW929175,MZ089731,MZ727333,ON857932  
VC\_756\_0 KC751414,KF302037  
VC\_757\_0 MG592599,MG592619  
VC\_758\_0 MG592629,MW824407,MW824408,MW824409,MW865297,MW865299,MW865302,MW865307,OL676770,OX241435,OX241436,OX241445,OX241446,OX241447,OX241501,OX241504,OX241559,OX241560  
VC\_759\_0 MN988507,MN988510,MN988527  
VC\_76\_0 GU988610,HE983845,HQ832595,KC862297,KC862298,KC862300,KR052143,KT736033,KT804923,KU297675,KU497559,KU761955,KY000083,KY073228,LN610572,LN610575,LN610586,LN610587,MF974178,MH370478,MH725810,MH791399,MH791408,MH791416,MK138526,MK224498,MK340761,MK4443264,MN013356,MN563785,MN871470,MN871481,MN871488,MW526259,OK539826,ON169972,ON361135  
VC\_76\_1 MK443265  
VC\_760\_0 MW202785,MW202796,OK172329  
VC\_761\_0 DQ398042,EU568876,FJ973624,GQ303261,JN412593,KN699002,KC787103,KC787104,KC787107,KC787108,KC787109,KC787110,KC787111,KC787112,KJ725374,KM923970,KT347314,KT355472,KT355474,KT365399,KX443326,KX534004,KX588251,KX641265,KX641266,KX664455,MF668268,MF668272,MF919497,MG099946,MH001455,MH001456,MH045569,MH077584,MH371116,MH371119,MH450127,MH479920,MH590605,MH779505,MH779507,MH779509,MH779513,MH779514,MH779515,MK305884,MK310146,MK433277,MK433279,MK524493,MK524494,MK919475,MN444875,MT818422,MW119570,MW291028,MZ121377,MZ747508,ON392160,ON392162,ON637759,ON637765,ON637766,ON645337,ON970618,OP172872,OP294982  
VC\_762\_0 KJ410133,KR080197,KR080198,KR080202,MF141540,MK494105,MN234183,MN234185,MN234219  
VC\_763\_0 MW584160,MW584202  
VC\_763\_1 JN699628,KC900379,KT591491,MH697587,MK937612,MN586024,MT658803,MW713383,OP297551  
VC\_763\_2 JF937105,KY223999,KY783914,MF319184,MT657341,MT658802,MW578836  
VC\_764\_0 DQ398052,KP027195,KY385381,MN585992  
VC\_765\_0 DQ431235,FJ706171,FJ706172,JX262215,JX262216,JX262217,JX262218,JX262219,JX262220,JX262221,JX262222,JX262223,JX262224,JX262225,JX570702,JX570703,JX570704,JX570705,JX570706,JX570707,JX570708,JX570709,JX570710,JX570711,JX570712,JX570713,JX570714,KJ578758,KJ578759,KJ578760,KJ578761,KJ578762,KJ578763,KJ578764,KJ578765,KJ578766,KJ578767,KJ578768,KJ578769,KJ578770,KJ578771,KJ578772,KJ578773,KJ578774,KJ578775,KJ578776,KJ578777,KJ578778,KJ578779,KJ578780,KJ578781,KJ578782,KJ578783,KJ578784,KJ578785,KJ578786,KJ578787,KJ578788,KJ578789,KJ578791,KJ578792,KJ722067,KR337643,KR337644,KR337645,KR337646,KR337647,KR337648,KR337649,KR337650,KR337651,KR337652,KR337653,KR337654,KR347352,KR347353,KR347354,KR347355,KR902978,KR902979,KR902980,KR902981,KR902982,KR902983,KR902984,KR902985,KR902986,KR902987,KT934381,KY926792,KY926793,MF919491,MF919505,MF919515,MF919516,MF919522,MF919533,MG820632,MG820633,MG820634,MG820635,MG820636,MG820637,MG820638,MG820639,MG820640,MG820641,MG820642,MG820643,MG820644,MG820645,MN329678,MN813675,MN813677,MN813679,MN813688,MN813689,MN813690,MN813691,MN813692,MT647607,MW161461,MW161462,MW161463,MW161464,MW161465,MW161466,MW161467,MW161468,MW505928  
VC\_766\_0 LN681534,MN718463  
VC\_767\_0 JF923796,JF923797,KR053201,MF919510,MF919542,MG757157,MG757166,MH536819,MH536824,MH576960,MH669007,MH669013,MH727547,MH727552,MH744424,MH779499,MH779501,MH779508,MH779510,MK376954,MK376960,MK376962,MK433272,MK977699,MN369753,MN369766,MN428063,M  
VC\_768\_0 T889393,MT986025,MW507129,MZ322010,MZ322022,MZ622178,ON456333  
VC\_769\_0 MG198776,MG198777,MG198778,MG198780,MH926056,MH926057,MH976516,MK977700  
VC\_77\_0 MW452562,MW582531  
VC\_770\_0 AB472900,KC862295,KC862296,KC862299,KC862301,KM434186,KY994101,LN610573,LN610576,LN610581,LN610582,LN610583,MK799650,MT108728,MT108730,MT118294,MT118295,MT118300,OM421595,ON653033  
VC\_770\_0 DQ500118,MN988496,MW960032,OP484857,OP484858  
VC\_771\_0 MN988490,MN988502  
VC\_772\_0 MG065644,MG065662,MG065672,MG065674,MG065677,MG065690  
VC\_772\_1 MK962749,ON286975  
VC\_772\_10 MN850630,MT884008,MT884009,MT884010,MT884011,MZ501082,MZ501083,MZ501102  
VC\_772\_11 LC739541,LC739542,MH491969,MH752840,MZ501048,MZ501094  
VC\_772\_12 MG065659  
VC\_772\_13 MG065653  
VC\_772\_14 MG065654,MG065655,MG065666  
VC\_772\_15 DQ832317,KC690136,KP869102,KP869103,KP869112  
VC\_772\_16 KJ190158,LC739538,LC739540,MG065646,MG065647,MG065658,MG065661,MG065682,MG963916,MN850642  
VC\_772\_17 MW748998,MZ501073  
VC\_772\_18 MZ501061  
VC\_772\_19 KT001917,LR699804,MG065635,MK327930,MK373780,MN850576,MN850578,MN850595,MN850597,MN850612,MN850626,MN850627,MZ501054,MZ501062,OK272482,OV101294  
VC\_772\_2 MZ501060  
VC\_772\_20 MN850593,MT682716  
VC\_772\_3 MZ501093  
VC\_772\_4 JQ031132,MK883717,MK883718,MW883061



VC\_772\_5 MT740314  
VC\_772\_6 MN850646,MN850649,MZ501111  
VC\_772\_7 LR694610,LR694611  
VC\_772\_8 KR698074,ON286973  
VC\_772\_9 KY683736,LN881727,LN881735,LR597647,LR694165,MG022439,MG022440  
VC\_773\_0 DQ864624,MK448678,MK448689,MK448693,MK448696,MK448697,MK448699,MK448766,MK448779,MK448784,MK448789,MK448797,MK448852,MK448866,MK448867,MK448868,MK448871,MK448947,MK448952,MK448961,MK448968,MK448974,MK448976  
VC\_774\_0 GQ478081,GQ478082,GQ478083,GQ478084,GQ478085  
VC\_775\_0 MK448854,MK448933,MK448950  
VC\_775\_1 MK448673,MK448765,MK448775,MK448794,MK448795,MK448858,MK448864,MK448941,MK448944,MK448945,MK448946,MK448953,MK448957,MK448970  
VC\_777\_0 EF537008,KF598865,MT457475  
VC\_778\_0 DQ875742,OM897575,ON677538,OP056300  
VC\_779\_0 EF056009,HQ259105,JX415535,JX880034,KC206276,KF192075,KF562340,KF620435,KJ135004,LR999871,MG208881,MG770228,MG922974,MH358458,MH669274,MH733496,MH992123,MK931297,MT682708,MW175414,MW630115,MZ358387,MZ394712,MZ501049,OM632664,OM632665,OM632666,OM632669,OM632670,OM632672,OM982646,ON602749,ON602751,ON922919,OP312987,OV049961,OW991345  
VC\_779\_1 KF787094,KF787095,KT321317,MG018928,MK962626,MK962629,MK962630,MK962631,MK962632,MK962639,MK962641  
VC\_779\_2 KF806588,KX098389,KX098390,KX098391,MH160392  
VC\_779\_3 MG983743,MK863032,MN062186,MZ326856,MZ326857,MZ326861,OM687511  
VC\_78\_0 MG018930,MZ605293  
VC\_78\_1 KU130126,KU130127,KU130128,KU130129,KU130130,KU130131  
VC\_78\_2 OK040171  
VC\_78\_3 KJ409772,MN905160,MT670417,MT670418,MT670419,MT670420,MT670421,MT670422,MW175491,MZ348426,MZ868713  
VC\_78\_4 MN812694  
VC\_78\_5 LN887844,MZ826350,MZ826353,OK258139,OK275491,OM982620  
VC\_78\_6 MF893340  
VC\_780\_0 KC139517,KC139520,KM236242,MH899585,MN163281,MW544066,OM858838,OM908766  
VC\_781\_0 KU356690,KU356691  
VC\_782\_0 MG592603,MG592604,MG592610  
VC\_783\_0 MN228696,MW960036,MW960038  
VC\_784\_0 KC438282,KC438283,KP280062,KY065148,KY612839,OP313112  
VC\_786\_0 MT234338,MT234339,MT234340  
VC\_79\_0 AB560486,AP018815,FM201282,IN254800,KP340287,KP340288,KR869157,KX171208,LC102730,LC105987,LC105988,LC105989,LC105990,LC472883,LC472884,LN610579,LN610588,MF490240,MG897799,MN871458,MN871459,MN871461,MN871462,MN871464,MN871465,MN871466,MN871473,MN871479,MN871485,MN871487,MN871508,MN871509,MT118291,MT118298,MT118299,MT119363,MT119365,MT119368,MT119376,MT1133561,MT1133562,MT349888,MT413450,MT933737,MW512833,MW595221,MZ553930,OL362268,OL362269,OL754588,OM953790,ON324181,ON375838,ON375839,ON375840,ON529291,ON857930,ON857934,ON857942,OP310975,OP310977,OP314870,OP314871  
VC\_79\_1 LC472881,MW406974  
VC\_79\_10 AP019535  
VC\_79\_11 KY000082  
VC\_79\_2 FM201281  
VC\_79\_3 OP310979  
VC\_79\_4 MF623055,MT118289,MT118292  
VC\_79\_5 MK837009,MW595220  
VC\_79\_6 MK837010,MN871457,MN871460,MN871467,MT108729,MT491204,MT491205,MT491206,MW512830,MW512834,OP310974  
VC\_79\_7 FM887021,FM897211,GU815091,KR054033,KU198331,MF490241,MF768470,MK318076,MN131141,MN131142,MN131143,MN615700,MN615701,MN615702,MT108727,MT118290,MT119366,MT119369,MZ285878,ON857925,ON857929,ON857937,ON857938,OP310970,OP310971,OP310972,OP310973,OP310976,OP310978,OP310980,OP310981,OP310982,OP314872  
VC\_79\_8 KM434184  
VC\_79\_9 MK340760,MN871468  
VC\_791\_0 EF432053,KP282673,KP282674  
VC\_792\_0 EF460875,HQ728264,KF534715,KY087898,MF044458,MH191398,MN045229,MN098326,MN117721,MN122072,MN136198,MN812688,MN850594,MT230534,MT446397,MT446398,MT446399,MT446400,MT446402,MT446403,MT446406,MT446409,MT446419,MW147598,MW147599,MW147600,MW147601,MW147602,MW349138,OK073976,OK129343,OK148439,OL741059,OL960574,ON778463  
VC\_793\_0 KJ002054,KJ858521,KY709296,LR813619,MT623578,MW380983,MW380984,MW380985,MZ336020,OL770365,OM810291,OP056089  
VC\_794\_0 EF506570,SVU28974,XS1344  
VC\_795\_0 KM236243,KP064094,KX534337,LN881725,LR025195,LR025196,LR025197,LR025198,LT907986,MH230177,MK672798,MZ501071,MZ501091,MZ501104,MZ501110,MZ501112,OL539454,OL960573,OL960575  
VC\_796\_0 MK816297,MN029011,MN871471,MN871472,MN871474  
VC\_799\_0 GU580941,GU580942  
VC\_799\_1 MG962368,MG962369,MK376953,MK376957,MN010761,MN204501,MN284896,MN284904,MN585971,MN585982,MN585988,MN585996,MT310850,MT498039,MT498052,MT521994,MW291022,MW862987,MZ005675,MZ005683,MZ171370,MZ209301,MZ388556,MZ622168,ON526971,ON970572,ON970622,AB045978,AF424782,AP009363,AP012341,AY954955,AY954956,AY954957,CP062434,CP062442,CP062461,EF462198,EU861005,JQ779023,JQ957932,JX174275,KF598856,KT186243,KY056620,LC541428,MF580410,MG029509,MG029511,MG029513,MG029514,MG029515,MG029516,MG029517,MG029518,MG770897,MH384261,MK348510,MK801680,MK801681,MK940809,MT366568,MT899504,MW924497,OL690335,OL840290,OM304856,OM439665,OM439667,ON856257,ON856258,ON898481,OP038318,OP038319,OP136131,OP136132,OP136134,OP328420,OP328422,OP374154,OP374155,OP374156,OP584903,OP584904  
VC\_80\_0 DQ163917,EU176414,KP981875,KR054028,KR054030,KT254130,KT254131,KT254132,KT254133,KT372690,KT372691,KT372692,KT372693,KT372694,KT372695,KT372696,KT372697,KT372698,KT372699,KT372700,KT372701,KT372702,KT372703,KT372704,KT372705,KT372706,KT372707,KT372708,KT372709,KT372710,KT372711,KT372712,KT372713,KT372714,KT372715,KT372716,KT372717,KT372718,KT372719,KT372720,KT372721,KT372722,KT372723,KT372724,KT372725,KT372726,KT372727,KT372728,KT372729,KT372730,KT372731,KT372732,KT372733,KT372734,KT372735,KT372736,KT372737,KT372738,KT372739,KT372740,KT372741,KT372742,KT372743,KT372744,KT372745,KT372746,KT372747,KT372748,KT372749,KT372750,KT372751,KT372752,KT372753,KT372754,KT372755,KT372756,KT372757,KT372758,KT372759,KT372760,KT372761,KT372762,KT372763,KT372764,KT372765,KT372766,KT372767,KT372768,KT372769,KT372770,KT372771,KT372772,KT372773,KT372774,KT372775,KT372776,KT372777,KT372778,KT372779,KT372780,KT372781,KT372782,KT372783,KT372784,KT372785,KT372786,KT372787,KT372788,KT372789,KT372790,KT372791,KT372792,KT372793,KT372794,KT372795,KT372796,KT372797,KT372798,KT372799,KT372800,KT372801,KT372802,KT372803,KT372804,KT372805,KT372806,KT372807,KT372808,KT372809,KT372810,KT372811,KT372812,KT372813,KT372814,KT372815,KT372816,KT372817,KT372818,KT372819,KT372820,KT372821,KT372822,KT372823,KT372824,KT372825,KT372826,KT372827,KT372828,KT372829,KT372830,KT372831,KT372832,KT372833,KT372834,KT372835,KT372836,KT372837,KT372838,KT372839,KT372840,KT372841,KT372842,KT372843,KT372844,KT372845,KT372846,KT372847,KT372848,KT372849,KT372850,KT372851,KT372852,KT372853,KT372854,KT372855,KT372856,KT372857,KT372858,KT372859,KT372860,KT372861,KT372862,KT372863,KT372864,KT372865,KT372866,KT372867,KT372868,KT372869,KT372870,KT372871,KT372872,KT372873,KT372874,KT372875,KT372876,KT372877,KT372878,KT372879,KT372880,KT372881,KT372882,KT372883,KT372884,KT372885,KT372886,KT372887,KT372888,KT372889,KT372890,KT372891,KT372892,KT372893,KT372894,KT372895,KT372896,KT372897,KT372898,KT372899,KT372900,KT372901,KT372902,KT372903,KT372904,KT372905,KT372906,KT372907,KT372908,KT372909,KT372910,KT372911,KT372912,KT372913,KT372914,KT372915,KT372916,KT372917,KT372918,KT372919,KT372920,KT372921,KT372922,KT372923,KT372924,KT372925,KT372926,KT372927,KT372928,KT372929,KT372930,KT372931,KT372932,KT372933,KT372934,KT372935,KT372936,KT372937,KT372938,KT372939,KT372940,KT372941,KT372942,KT372943,KT372944,KT372945,KT372946,KT372947,KT372948,KT372949,KT372950,KT372951,KT372952,KT372953,KT372954,KT372955,KT372956,KT372957,KT372958,KT372959,KT372960,KT372961,KT372962,KT372963,KT372964,KT372965,KT372966,KT372967,KT372968,KT372969,KT372970,KT372971,KT372972,KT372973,KT372974,KT372975,KT372976,KT372977,KT372978,KT372979,KT372980,KT372981,KT372982,KT372983,KT372984,KT372985,KT372986,KT372987,KT372988,KT372989,KT372990,KT372991,KT372992,KT372993,KT372994,KT372995,KT372996,KT372997,KT372998,KT372999,KT373000,KT373001,KT373002,KT373003,KT373004,KT373005,KT373006,KT373007,KT373008,KT373009,KT373010,KT373011,KT373012,KT373013,KT373014,KT373015,KT373016,KT373017,KT373018,KT373019,KT373020,KT373021,KT373022,KT373023,KT373024,KT373025,KT373026,KT373027,KT373028,KT373029,KT373030,KT373031,KT373032,KT373033,KT373034,KT373035,KT373036,KT373037,KT373038,KT373039,KT373040,KT373041,KT373042,KT373043,KT373044,KT373045,KT373046,KT373047,KT373048,KT373049,KT373050,KT373051,KT373052,KT373053,KT373054,KT373055,KT373056,KT373057,KT373058,KT373059,KT373060,KT373061,KT373062,KT373063,KT373064,KT373065,KT373066,KT373067,KT373068,KT373069,KT373070,KT373071,KT373072,KT373073,KT373074,KT373075,KT373076,KT373077,KT373078,KT373079,KT373080,KT373081,KT373082,KT373083,KT373084,KT373085,KT373086,KT373087,KT373088,KT373089,KT373090,KT373091,KT373092,KT373093,KT373094,KT373095,KT373096,KT373097,KT373098,KT373099,KT373100,KT373101,KT373102,KT373103,KT373104,KT373105,KT373106,KT373107,KT373108,KT373109,KT373110,KT373111,KT373112,KT373113,KT373114,KT373115,KT373116,KT373117,KT373118,KT373119,KT373120,KT373121,KT373122,KT373123,KT373124,KT373125,KT373126,KT373127,KT373128,KT373129,KT373130,KT373131,KT373132,KT373133,KT373134,KT373135,KT373136,KT373137,KT373138,KT373139,KT373140,KT373141,KT373142,KT373143,KT373144,KT373145,KT373146,KT373147,KT373148,KT373149,KT373150,KT373151,KT373152,KT373153,KT373154,KT373155,KT373156,KT373157,KT373158,KT373159,KT373160,KT373161,KT373162,KT373163,KT373164,KT373165,KT373166,KT373167,KT373168,KT373169,KT373170,KT373171,KT373172,KT373173,KT373174,KT373175,KT373176,KT373177,KT373178,KT373179,KT373180,KT373181,KT373182,KT373183,KT373184,KT373185,KT373186,KT373187,KT373188,KT373189,KT373190,KT373191,KT373192,KT373193,KT373194,KT373195,KT373196,KT373197,KT373198,KT373199,KT373200,KT373201,KT373202,KT373203,KT373204,KT373205,KT373206,KT373207,KT373208,KT373209,KT373210,KT373211,KT373212,KT373213,KT373214,KT373215,KT373216,KT373217,KT373218,KT373219,KT373220,KT373221,KT373222,KT373223,KT373224,KT373225,KT373226,KT373227,KT373228,KT373229,KT373230,KT373231,KT373232,KT373233,KT373234,KT373235,KT373236,KT373237,KT373238,KT373239,KT373240,KT373241,KT373242,KT373243,KT373244,KT373245,KT373246,KT373247,KT373248,KT373249,KT373250,KT373251,KT373252,KT373253,KT373254,KT373255,KT373256,KT373257,KT373258,KT373259,KT373260,KT373261,KT373262,KT373263,KT373264,KT373265,KT373266,KT373267,KT373268,KT373269,KT373270,KT373271,KT373272,KT373273,KT373274,KT373275,KT373276,KT373277,KT373278,KT373279,KT373280,KT373281,KT373282,KT373283,KT373284,KT373285,KT373286,KT373287,KT373288,KT373289,KT373290,KT373291,KT373292,KT373293,KT373294,KT373295,KT373296,KT373297,KT373298,KT373299,KT373300,KT373301,KT373302,KT373303,KT373304,KT373305,KT373306,KT373307,KT373308,KT373309,KT373310,KT373311,KT373312,KT373313,KT373314,KT373315,KT373316,KT373317,KT373318,KT373319,KT373320,KT373321,KT373322,KT373323,KT373324,KT373325,KT373326,KT373327,KT373328,KT373329,KT373330,KT373331,KT373332,KT373333,KT373334,KT373335,KT373336,KT373337,KT373338,KT373339,KT373340,KT373341,KT373342,KT373343,KT373344,KT373345,KT373346,KT373347,KT373348,KT373349,KT373350,KT373351,KT373352,KT373353,KT373354,KT373355,KT373356,KT373357,KT373358,KT373359,KT373360,KT373361,KT373362,KT373363,KT373364,KT373365,KT373366,KT373367,KT373368,KT373369,KT373370,KT373371,KT373372,KT373373,KT373374,KT373375,KT373376,KT373377,KT373378,KT373379,KT373380,KT373381,KT373382,KT373383,KT373384,KT373385,KT373386,KT373387,KT373388,KT373389,KT373390,KT373391,KT373392,KT373393,KT373394,KT373395,KT373396,KT373397,KT373398,KT373399,KT373400,KT373401,KT373402,KT373403,KT373404,KT373405,KT373406,KT373407,KT373408,KT373409,KT373410,KT373411,KT373412,KT373413,KT373414,KT373415,KT373416,KT373417,KT373418,KT373419,KT373420,KT373421,KT373422,KT373423,KT373424,KT373425,KT373426,KT373427,KT373428,KT373429,KT373430,KT373431,KT373432,KT373433,KT373434,KT373435,KT373436,KT373437,KT373438,KT373439,KT373440,KT373441,KT373442,KT373443,KT373444,KT373445,KT373446,KT373447,KT373448,KT373449,KT373450,KT373451,KT373452,KT373453,KT373454,KT373455,KT373456,KT373457,KT373458,KT373459,KT373460,KT373461,KT373462,KT373463,KT373464,KT373465,KT373466,KT373467,KT373468,KT373469,KT373470,KT373471,KT373472,KT373473,KT373474,KT373475,KT373476,KT373477,KT373478,KT373479,KT373480,KT373481,KT373482,KT373483,KT373484,KT373485,KT373486,KT373487,KT373488,KT373489,KT373490,KT373491,KT373492,KT373493,KT373494,KT373495,KT373496,KT373497,KT373498,KT373499,KT373500,KT373501,KT373502,KT373503,KT373504,KT373505,KT373506,KT373507,KT373508,KT373509,KT373510,KT373511,KT373512,KT373513,KT373514,KT373515,KT373516,KT373517,KT373518,KT373519,KT373520,KT373521,KT373522,KT373523,KT373524,KT373525,KT373526,KT373527,KT373528,KT373529,KT373530,KT373531,KT373532,KT373533,KT373534,KT373535,KT373536,KT373537,KT373538,KT373539,KT373540,KT373541,KT373542,KT373543,KT373544,KT373545,KT373546,KT373547,KT373548,KT373549,KT373550,KT373551,KT373552,KT373553,KT373554,KT373555,KT373556,KT373557,KT373558,KT373559,KT373560,KT373561,KT373562,KT373563,KT373564,KT373565,KT373566,KT373567,KT373568,KT373569,KT373570,KT373571,KT373572,KT373573,KT373574,KT373575,KT373576,KT373577,KT373578,KT373579,KT373580,KT373581,KT373582,KT373583,KT373584,KT373585,KT373586,KT373587,KT373588,KT373589,KT373590,KT373591,KT373592,KT373593,KT373594,KT373595,KT373596,KT373597,KT373598,KT373599,KT373600,KT373601,KT373602,KT373603,KT373604,KT373605,KT373606,KT373607,KT373608,KT373609,KT373610,KT373611,KT373612,KT373613,KT373614,KT373615,KT373616,KT373617,KT373618,KT373619,KT373620,KT373621,KT373622,KT373623,KT373624,KT373625,KT373626,KT373627,KT373628,KT373629,KT373630,KT373631,KT373632,KT373633,KT373634,KT373635,KT373636,KT373637,KT373638,KT373639,KT373640,KT373641,KT373642,KT373643,KT373644,KT373645,KT373646,KT373647,KT373648,KT373649,KT373650,KT373651,KT373652,KT373653,KT373654,KT373655,KT373656,KT373657,KT373658,KT373659,KT373660,KT373661,KT373662,KT373663,KT373664,KT373665,KT373666,KT373667,KT373668,KT373669,KT373670,KT373671,KT373672,KT373673,KT373674,KT373675,KT373676,KT373677,KT373678,KT373679,KT373680,KT373681,KT373682,KT373683,KT373684,KT373685,KT373686,KT373687,KT373688,KT373689,KT373690,KT373691,KT373692,KT373693,KT373694,KT373695,KT373696,KT373697,KT373698,KT373699,KT373700,KT373701,KT373702,KT373703,KT373704,KT373705,KT373706,KT373707,KT373708,KT373709,KT373710,KT373711,KT373712,KT373713,KT37



VC\_817\_0 EU622808,EU771092,KU831549,MF407276,MT459794,MW354668,MW354670,MW477480,MZ570263,OL744111,OM249958,ON042750,PZACG,X99260  
VC\_818\_0 KC685370,KX349899,KX349900,KX349901,KX961631,KY947509,MF156577,MF156578,MF156580,MH817022,MK084630,MK284526,MK284527,MK284528,MN082624,MT777452,MW012634,MW348917,MZ384014,OL744112  
VC\_82\_0 DQ029335,FP409640,HQ641340,HQ641341,HQ641342,HQ641343,HQ641344,JQ780163,KY883643,KY883644,KY883645,KY883646,KY883648,KY883649,KY883650,KY883651,KY883652,KY883653,MF574151,MC9957431,MT215167,ON464735,ON464736  
VC\_823\_0 EU734173,GQ413937,HG990492,HM480846,KR149291,KT367885,KU183006,KX591654,KX712070,KX712071,KY389315,KY389316,KY450753,KY652723,KY652724,KY652725,LC413193,LC413194,LC413195,LN866626,MF285615,MC835568,MH172261,MH172262,MH172263,MH172264,MH587638,MK134560,MK203841,MK380015,MK380016,MK521905,MK618658,MK795385,MK903728,MN052874,MN101216,MN101218,MN101227,MN149903,MN176574,MN434093,MN585130,MT425185,MT446417,MT446418,MT542697,MT813140,MT813141,MT966872,MT966873,MW042787,MW042788,MW042789,MW042790,MW042791,MW042792,MW042793,MW042794,MW042795,MW042796,MW042797,MW042798,MW042799,MW042800,MW042801,MW042803,MW042804,MW042806,MW042807,MW042808,MW042809,MW042810,MW042811,MW042812,MZ424865,MZ571832,OK138556,OL409034,OL799328,OM194188,OM194189,OM194190,OM148528,ON148529,ON571554,ON602742,ON602753,ON602755,ON880501,OP013026,OP045496,OP103917,OP103918,OP103919,OP103920,OP103921,OP103922,OP103923,OP256047,OU342754,OX335359,OX335360,OX335375,OX335376,OX335377,OX335389,OX335390,OX335392,OX335394,OX335398,OX335401,OX335408,OX335409,OX335413,OX335414,OX335418,OX335426,OX335427,OX335433,OX335438,OX335440,OX335443  
VC\_826\_0 ON170019,ON170022,ON170028,ON170033,ON170036,ON170038,ON170040,ON170049,ON170054,ON170074,ON170086,ON170088,ON170090,ON170092,ON170094,ON170096,ON170098,ON170100,ON170102,ON170104,ON170106,ON170108,ON170110,ON170112,ON170114,ON170116,ON170118,ON170120,ON170122,ON170124,ON170126,ON170142,ON170144,ON170146,ON170152,ON170154,ON170156,ON170158,ON170160,ON170162,ON170164,ON170167,ON170176,ON170180,ON170186,ON170189,ON170192,ON170194,ON170196,ON170198,ON170200,ON170202,ON170204,ON170206,ON170211,ON170215,ON170217,ON170219,ON170221,ON170222,ON170225,ON170244,ON170246,ON170248,ON170250,ON170252,ON170271,ON170280,ON170282,ON170284,ON170289,ON170291,ON170293,ON170295,ON170297,ON170298,ON170300,ON170306,ON170307,ON170311,ON170313,ON170315,ON170330,ON170332,ON170334,ON170336,ON170338,ON170340,ON170352,ON170356,ON170360  
VC\_827\_0 KJ018213,MG592431,MG592432,MG592435,MG592458,MG592666  
VC\_828\_0 JQ619704,MG784342,MH598512  
VC\_829\_0 EU887664,JX887877,KF296717,KX190834,MT136606  
VC\_83\_0 AB597179,KP343639,OK274245,OK318991,OP313111,OP617560  
VC\_830\_0 FID08913,HE608841,MN078104,MT630433,MW314138,MW916539  
VC\_833\_0 FJ591093,FJ591094,FR682616,FR719956,HQ317387,KJ621082,KJ803031,KU885988,KU885989,KU885990,MH015250,MH015253,MH015256,MH015257,MH015259,MZ773648  
VC\_834\_0 FJ685651,GU321093,JN882264,JN882266,KF056323,MW344764,MW344766  
VC\_835\_0 FJ750948,GQ502199,JN984867,JQ086375,JX865427,KM233151,KM896878,KX534335,KX534336,KX534338,KX534339,KX534341,LN881730,LN881731,LR597646,LR990702,LR999870,LT960609,MC065648,MC581355,MK138527,MK373789,MK373790,MK373791,MK728541,MN850575,MN850589,MN850628,MN850629,MN850650,MT331608,MT331609,MT446389,MT446391,MT478993,MT884012,MT884013,MT884014,MT884015,MT951623,MW749005,MW822006,MW862804,MZ234008,MZ234014,MZ234016,MZ234026,MZ234029,MZ501070,MZ501088,MZ501095,MZ501097,MZ501107,OK272474,OK272488,OK310512,OK310513,OK310514,OK499985,OK499988,OK499993,OL615010,OL770278,OM262540,OM262541,ON184124,ON210136,OP046317  
VC\_836\_0 KT367887,MN656993,MT075871,MW419910,OL539440,OM687892,ON602734,ON602747,ON602766  
VC\_837\_0 FJ896200,LR794124,MF754111,MF754112,MK474470,MN974282,MT178448,MT501516,MW250641,MW331544,MZ202022,MZ182247,MZ516827,MZ592921,OK349506,OK585158,OK585159,OK585160,OM362522,OM799543,ON080940,ON080941,ON457554,ON457555,ON457556,ON457557,ON864052,ON872379,OP117450  
VC\_838\_0 FN422399,HG962375,JX194238,KM411958,KM411959,KM411960,KM974184,KP994390,KR052142,KR054032,KU948710,KX171209,KX171210,MF490236,MF490238,MH356729,MN553583,MN553584,MN906996,MT080102,MZ2955867,OK665488,OL519844,OM234792,OM937766,ON815901,ON815902,ON815903,ON857943  
VC\_839\_0 FN422398,LC064302,MT416090,OL519842,OM782452  
VC\_841\_0 KY083726,KY514264,KY514265,KY549659,KY769270,MH059638,MN812685,MN812687,MN812691,MZ348421  
VC\_842\_0 MG775260,MH179480  
VC\_843\_0 FN667788,FN667789,HE815464,MK408758,MT932329  
VC\_844\_0 FR823450,GU296433,JN132397,JX569801,KF148616,KM229736,KX236333,KX879627,MH107028,MT863714,MT863715,MT863716,MT863717,MT863718,MT863719,MT863720,MT863721,MT863722,MT863723,MT863724,MT863725,MT863726,MT863727,MT863728,MT863729,MT863730,MT863731  
VC\_845\_0 MK387337,MW451250,OM249648  
VC\_846\_0 MK388689,OK570186  
VC\_847\_0 LC739533,LC739534,LC739535,LC739537,LC739539  
VC\_847\_1 JX561091,KX552041,KX664695,LR597654,LR746137,MC065650,MH051333,MH160766,MH252123,MK373788,MN850565,MN850571,MN850598,MN850618,MN850648,MT496970,MT944117,MW175890,MZ276793,OL505078,OL739525,OM362897,OM386656,OM386659,OM386667,OP562383  
VC\_848\_0 FR775895,KX522583,LC739536,LR865361,MF805809,MC065639,MC065645,MC065656,MC065689,MH675927,MH816848,MN850573,MN850584,MN850601,MN850632,MN850645,MT932211,MZ501063,MZ501084,MZ501100,OK210077,OK272470,OM386653,OM386654,OM386658,OM401812,OP177727,OX090893  
VC\_848\_1 OP617743  
VC\_849\_0 MH533020,ON287369,ON287374  
VC\_849\_1 MZ520832  
VC\_849\_2 JQ015307,KY514263  
VC\_849\_3 MF979560,MF979563  
VC\_849\_4 MT552976,MT560059  
VC\_849\_5 JQ691612,KC954774,KT353109  
VC\_849\_6 JQ691611,MN013077,OL744211,OL744214,OL744216,OL744219,OL744220  
VC\_849\_7 ON712643  
VC\_849\_8 MW367417  
VC\_849\_9 MW250786  
VC\_85\_0 KJ010547,KJ010548,KM051843  
VC\_85\_1 MW419084,MW419085,MW419086,MW419087  
VC\_85\_10 MN043729  
VC\_85\_11 MN940411  
VC\_85\_12 MT151604  
VC\_85\_13 KU640380  
VC\_85\_2 KC699836,MW749002,MW749007  
VC\_85\_3 AB930182,AP013029,KF669652,LT960608,MF422185,MC000860,MW354667,MZ501260,MZ501261,MZ501262,MZ501263,MZ501265,OM982668,OM982669,OM982670,OM982671,OM982672,OM982673,OM982674  
VC\_85\_4 KY368640,MN043730,OK349510  
VC\_85\_5 MH606185  
VC\_85\_6 JX238501  
VC\_85\_7 KM236246  
VC\_85\_8 KU253712  
VC\_85\_9 KM236245  
VC\_850\_0 OK136181,OK181860,OK181862  
VC\_851\_0 MH444512,MK932884  
VC\_853\_0 MG941013,MW073100  
VC\_855\_0 GQ241246,KF669650  
VC\_856\_0 MH371108,MH371109,MH536823,MZ355724,MZ456035,ON260827,ON970603  
VC\_856\_1 KJ173786,MH271300,MH271307,MH271310,MH271316,MH399779,MK376963,MK919474,MK937596,MN096374,MN908690,MZ622166,OP068333  
VC\_857\_0 KU160638,KU160639,KU160647,KU160663,KU160666,MF185731,MN234164,MN234217,MN234224,MT310874,MT986028  
VC\_859\_0 MH019215,MH019216,MK305891,MT498037,MT498053,MT897908,MT936332,MZ648033,MZ648036  
VC\_860\_0 MN023176,MN023177,MN023178,MN023179,MN023180,MN023181,MN023182,MN023183,MN023184,MN023185,MN023186,MN023187,MN023188,MN023189,MN023190,MN023191  
VC\_861\_0 JQ659259,KC013021,KC013022,KC013023,KC013024,KC013025,KX555527,MN552146,OV696621  
VC\_862\_0 GQ451696,KC013026,KC013027,KC013028,KC013029,KM262191,KM262192,KX578042,KX578043,KX578044,MN552147  
VC\_864\_0 GQ919031,MN234216  
VC\_865\_0 MK804893,MK813939



VC\_865\_1 MK813938  
VC\_865\_2 MK813941  
VC\_865\_3 OM033134,OM033135  
VC\_865\_4 OM033136  
VC\_866\_0 JN035618,KR063278,MW534374,ON526973  
VC\_866\_1 KU998240,MG099935,MH025889,MK450428,MK450430,MK450435,MK450436,MK494106,MK494109,MK494121,MK878903,MK919477,MK919481,ON724015,ON970582,ON970588,ON970596,ON970607,OP297547,OP434450  
VC\_866\_2 KR011062,KR011063,KR011064  
VC\_867\_0 KP790008,KP790009,KP790010,KR063279,KX557281,ON526975  
VC\_868\_0 KU963245,KU998241,MG099940,MG757152,MG757155,MG770211,MG770214,MK359302,MK433261,MK433263,MK433265,MK433267,MK801728,MK801733,MK967390,MN444874,MN945905,MT114160,MT889368,MT889370,MT889379,MT986029,MW507132,MW507133,ON456331  
VC\_869\_0 KU963258,KU963262,KU998242,KU998243,MH576976,MK494098,MN234166,OM203156,OP434448  
VC\_87\_0 FJ230960,KF669649,KY368639,MT601270,MT601271,MW001214,MZ751040,OM236513  
VC\_87\_1 KC595512,KC595513,KP554508  
VC\_87\_2 MH884511  
VC\_870\_0 KU998252,KU998253,KU998254,MH479923,MN096363  
VC\_872\_0 KX670789,KX670790,MF467948,MF467949,MG757154,MH155877,MH155880,MH669006,MK433259,MK433260,MK433268,MK433269,MK967386,MN204492,MN204494,MN204495,MN204496,MN204497,MN204500,MN204504,MN586054,MN586056,MT310852,MT310854,MT657340,MT684589,MT684600,MW055905,MW145539,MW712736,ON108646  
VC\_873\_0 GU936715,HM480106,MG271909  
VC\_874\_0 KR935216,KR935217,KT253150  
VC\_875\_0 GU942563,HQ224500,KJ619459,KP972568,KP972569,KR063267,KR063268,KT728930,KT728931,MF155889  
VC\_877\_0 MN830254,MN830255  
VC\_878\_0 HE956707,HE956710,JN651747,KC107834,KT184661,KT949345,KX756572,KY318515,LN878149,MF683623,MG878892,MH179473,MH992513,MK053931,MK330684,MK838107,MK838108,MK838109,MK838110,MK838111,MN509793,MT682386,MT682387,MT682388,MT682389,MT682390,MT682391,MW250276,MZ592920,OL362270,OM654404,ON287377  
VC\_879\_0 HF569088,HF569089,HF569090,HF569091,HF569092,HG428758,JN939331,JN939332,KC556893,KC556894,KC556895,KC556896,KC556897,KC556898,KJ133688,KJ133689,KJ133690,KJ133691,KJ133692,KJ133693,KJ133694,KJ133695,KJ133696,KJ133697,KJ133698,KJ133699,KJ133700,KJ133701,KJ133702,KJ133703,KJ133704,KJ133705,KJ133706,KJ133707,KY056619,MT002975  
VC\_88\_0 KT624200  
VC\_88\_1 MF418016  
VC\_880\_0 HG007973,HM150760  
VC\_881\_0 KP282679,KP282680  
VC\_882\_0 HG992588,JQ692107,JX556418,MF754113,MF754114,MF754115,MF754116,MG602476,MG893203,MH599087,MH925090,MN215888,MW451246,MW451251,MZ592922,OK483201,OK625546,OL314400,OP547477,OP595601  
VC\_883\_0 JF966203,KJ489397,KJ489398,KJ489400,KU737346,MF288921,MF288922,MF498901,MH638310,MK215646  
VC\_883\_1 KP208639,KP669647,KJ489402,KT307976,KU737345,KU737347,MF765814,MN038178,MW281503,OK499976,OK499990,OM350011  
VC\_883\_2 JN790865,JN797796  
VC\_883\_3 KF669662,KY888882  
VC\_883\_4 MN153503  
VC\_883\_5 MW787012  
VC\_883\_6 OM743306  
VC\_884\_0 KJ489399,KJ489401,KT207918,KU737344,KU737348,KU737349,KU737350,KU737351,KU737352,KX147229,KX156152,KX349902,KX349903,KX961629,KX961632,MF288917,MF288918,MF288919,MF288920,MG763894,MH538193,MH638311,MN038176,MN038179,MT584805,OK500001,OM350012,OM350013  
VC\_884\_1 HM144387,JN654439,KC430106,KU847400,KX011169,MW392803,MW584228,MW596414  
VC\_885\_0 MW677509,MW677510,MW677512,MW677515,MW677517,MW677520,OP009272,OP009275,OP009278,OP009280,OP009286  
VC\_886\_0 MN988459,MN988558  
VC\_886\_1 MW677529  
VC\_887\_0 HM152763,JF704108,JF704113,JN600672,MF185726,MH744425,MK279905,MK310144,MK494092,MK494100,MN586018,MN586023,MN617841,MT771349,MW435855,MW822149,MZ958746  
VC\_888\_0 JF744988,JN680858,KC661276,KC691254,KF024731,KT591489,KU234099,KU997639,KX507361,KX580961,KX580962,MF140422,MF185728,MF185730,MF324910,MH779511,MH834600,MK937600,MN096380,MN234228,MN586030,MN586052,MN703406,MN703410,MT758688,MW578835,MZ171373,OL455899  
VC\_888\_1 MH576973,MN234187,MZ005679  
VC\_889\_0 KF024725,KT281791,KT281794,KT372003,MF140405,MF140413,MF140414,MF140421,MH727559,MK878900,MN096377,MT889383,MT889391,MW291024,MZ622183,ON755181  
VC\_89\_0 MT601273,MT601274  
VC\_89\_1 MT601272,OL580764  
VC\_89\_2 KY030782,MT366945,MT366946,MT366947,MT366948  
VC\_89\_3 AF020713  
VC\_89\_4 ON107264  
VC\_89\_5 MZ969646  
VC\_89\_6 OM236515  
VC\_890\_0 MH651182,MK967378,MT658805  
VC\_890\_1 MH976515,MN444870,MT684599,OK040786  
VC\_891\_0 HQ268735,KY629621  
VC\_894\_0 HM588722,KF302032,KF302033  
VC\_895\_0 KF302036,KX365748  
VC\_896\_0 KR060090,KX912252,KY379511,MF370965,MT002875  
VC\_897\_0 HM640230,JN800508,KY996523,MH999279,MW815121,OP022426  
VC\_898\_0 JQ729990,JQ729991,JQ729992,MH248069,MW057920,MZ401005,MZ401007,MZ401008,MZ401009,OL547738  
VC\_899\_0 MH393889,MK017820,OM638104,OP256049  
VC\_9\_0 AB370205,AF424781,AP008953,AY954951,AY954952,AY954953,CP062427,CP062451,CP062454,DQ517338,DQ530359,DQ530360,EU861004,GU477322,HQ127381,JQ779024,JX274646,JX274647,KC677663,KJ716334,MG557619,MH321492,MK658834,MK801682,MK801683,MT013111,MW554488,OM439662,OM439666,OM439668,OM439670,OM439671,OM439675,ON911714,ON911715,ON911716,ON911717,ON911718  
VC\_90\_0 LC597490  
VC\_90\_1 OM634661  
VC\_90\_2 EF583821  
VC\_901\_0 KF623293,MW824400,MW824417,MW824421,MW824431  
VC\_902\_0 HQ316582,MG592662,MG592672  
VC\_903\_0 MW824414,MW824420,MW824427,MW824428,MW824429,MW865319,OX241434  
VC\_904\_0 JF713456,MG592585,MG592586,MG720309,MK559459,MT735629  
VC\_904\_1 HQ316604,KX198615,MT451873,ON015836  
VC\_904\_2 KY022433,MH925091,MN871506,MW411580,OK483199,OP547478,OV032860  
VC\_905\_0 MG189906,MT110073,MZ326862  
VC\_907\_0 HQ317384,HQ332142,KM233261



VC\_908\_0 MN988533,MN988538,MW980068  
VC\_909\_0 HQ317386,MG592522,MG640035,MT720689,OM387731  
VC\_91\_0 AB609718,AP009390,AP018714,AP018715,CAJDJY010000002,CAJDJZ010000002,KJ801817,KR049063,LC596377,LC596378,LC596379,LR031359,MK268686,MK693030,MK721192,MN854830,MW633168,MZ420150,ON113167,ON113168,ON113169,ON286976  
VC\_910\_0 OP559178  
VC\_911\_0 HQ317390,MZ568826  
HQ317392,KC821610,KC821616,KC821629,KC821630,KC821634  
VC\_912\_0 KM873719,KY951963,KY951964,KY979235,KY979236,KY979237,KY979238,KY979239,KY979240,KY979241,KY979242,KY979243,KY979244,KY979245,KY979246,KY979247,KY992519,KY992520,MK756083,MK756084,MK756085,MK756086,MK756087,MK756088,MK756089,MK756090,MK756091,MK756092,MK756093,MK756094,MK756095,MK756096,MT431535,MT585273,MT585274,MT585275,MT585276,MT585277,MT585278,MT585279,MT585280,MT585281,MT585282,MT585283,MT585284,MT585285,MT585286,MT585287,MT585288,MT585289,MT585290,MT585291,MT585292,MT585293,MT585294,MT585295,MT585296,MT585297,MT585298,MT585299,MT585300,MT585301,MT585302,MT585303,MT585304,MT585305,MT585306,MT585307,MT585308,MT585309,MT585310,MT585311,MT585312,MT585313,MT585314,MT585315  
VC\_913\_0 HQ332136,MW452941  
VC\_916\_0 HQ396194,MZ995504,ON922917,ON933637  
HQ403646,KU963260,KU998239,MG770215,MH271302,MH450132,MK279900,MK875791,MK875795,MK967383,MK967385,MN062716,MN234215,MN284906,MN310549,MN444871,MN444878,MN586015,MN586036,MN586049,MN586057,MT776808,MT776809,MT776810,MT889367,MT889378,MW507135  
VC\_919\_0 ,MW862988,MZ150793,MZ322013,MZ622167,OK040785,OL455888,OL829977,ON970576,ON970599,ON970609,ON970621,OP297531  
VC\_92\_0 CAJDKA010000002,KP339049,KY549443,LR990835,MH791397,MH880817,MN027503,MN241318,MT856905,MT909815,MW004544,MW004545,MZ147816,MZ333462,OL799258,OL799260,OL870611,OM966901,ON113170,ON125307,ON506927,ON506928  
VC\_920\_0 MN204493,MW822144  
VC\_921\_0 HQ632857,HQ632858  
VC\_922\_0 MK291441,MK291443  
VC\_923\_0 MW677513,MW677516,MW677518,MW677519,MW677521,MW677522,MW677523,MW677524,OP009265,OP009266,OP009267,OP009268,OP009269,OP009270,OP009271,OP009273,OP009276,OP009277,OP009279,OP009283,OP009284,OP009287,OP009288  
VC\_924\_0 MG592442,MG592450,MG592457,MG592460,MG592482,MG592483,MG592488,MG592489,MG592490,MG592502,MG592503,MG592504,MG592505,MG592516,MG592517,MG592525,MG592530,MG592532,MG592534,MG592535,MG592539,MG592543,MG592557,MG592558,MG592559,MG592576,MG59259  
3,MG592594,MG592597,MG592598,MG592605,MG592606,MG592607,MG592631  
VC\_925\_0 MN592896  
VC\_926\_0 MG592520,OX241566,OX241570  
VC\_927\_0 HQ698895,KJ410740  
VC\_928\_0 JF974286,JF974321,MT490303  
VC\_929\_0 HQ634192,KC821604,KC821621,KC821625  
VC\_93\_0 FJ822135,MT758689  
VC\_930\_0 KX889068,MG592409,MG592470,MG592519,MG592521,MG592668  
VC\_932\_0 HQ683709,MG209611  
VC\_933\_0 KR093625,KR093626,KR093627,KR093629,KR093630,KR093631,KR093633  
VC\_934\_0 MT119766,MT210154  
VC\_935\_0 MN988536,OP028995  
VC\_936\_0 MN602266,MN602267  
VC\_937\_0 JN672684,KR269719,KX237515,KY780482,MN013075,MN013076,MN013078,MN013079,MN013080,MN013083,MN013087,MT701592,MW021762,MW021764,MW021765,MW042802,MW417503,MW722081,MZ428221,MZ428224,MZ598515,MZ634348,MZ634350,MZ634351,OL539450,OL539472,OL865411,OM065837,OM065838,OM065839,OM065841,OM328157,OM735690,OP611406,OV877339,OV877387,OV877766,OX335361,OX335395,OX335410  
VC\_938\_0 JF501022,KP658157,KR262148,KT001920,KY575286,LR757892,MF415412,MF612072,MG552615,MG894052,MH445453,MH633484,MH633485,MH633486,MH633487,MH688453,MH844531,MK170446,MK278861,MK521904,MK618657,MK931442,MK931443,MK931444,MK931445,MN379832,MN395285,MN395286,MN689779,MN783016,MT894005,MW655991,MW672037,MZ172460,MZ221764,MZ398242,MZ428222,MZ428223,MZ428225,MZ428226,MZ428227,MZ428228,MZ571831,MZ571833,MZ571834,MZ634345,MZ634346,OK138555,OK655936,OL539448,OL539460,OL674249,OL702938,OL744210,OL744213,OM032871,OM065840,OM065842,OM065843,OM687893,OM938991,OM938992,OM964875,ON489264,ON602735,ON602741,ON602750,ON881905,OP267563,OP413832,OP617742,OL8342755,OW251746,OX335369,OX335370,OX335371,OX335380,OX335381,OX335383,OX335384,OX335385,OX335386,OX335387,OX335388,OX335391,OX335393,OX335400,OX335404,OX335411,OX335412,OX335417,OX335421,OX335422,OX335423,OX335429,OX335430,OX335432,OX335433,OX335439,OX335440,OX335441,OX335442,OX335443,OX335444,OX335445,OX335446,OX335447,OX335448,OX335449,OX335450,OX335451,OX335452,OX335453,OX335454,OX335455,OX335456,OX335457,OX335458,OX335459,OX335460,OX335461,OX335462,OX335463,OX335464,OX335465,OX335466,OX335467,OX335468,OX335469,OX335470,OX335471,OX335472,OX335473,OX335474,OX335475,OX335476,OX335477,OX335478,OX335479,OX335480,OX335481,OX335482,OX335483,OX335484,OX335485,OX335486,OX335487,OX335488,OX335489,OX335490,OX335491,OX335492,OX335493,OX335494,OX335495,OX335496,OX335497,OX335498,OX335499,OX335500,OX335501,OX335502,OX335503,OX335504,OX335505,OX335506,OX335507,OX335508,OX335509,OX335510,OX335511,OX335512,OX335513,OX335514,OX335515,OX335516,OX335517,OX335518,OX335519,OX335520,OX335521,OX335522,OX335523,OX335524,OX335525,OX335526,OX335527,OX335528,OX335529,OX335530,OX335531,OX335532,OX335533,OX335534,OX335535,OX335536,OX335537,OX335538,OX335539,OX335540,OX335541,OX335542,OX335543,OX335544,OX335545,OX335546,OX335547,OX335548,OX335549,OX335550,OX335551,OX335552,OX335553,OX335554,OX335555,OX335556,OX335557,OX335558,OX335559,OX335560,OX335561,OX335562,OX335563,OX335564,OX335565,OX335566,OX335567,OX335568,OX335569,OX335570,OX335571,OX335572,OX335573,OX335574,OX335575,OX335576,OX335577,OX335578,OX335579,OX335580,OX335581,OX335582,OX335583,OX335584,OX335585,OX335586,OX335587,OX335588,OX335589,OX335590,OX335591,OX335592,OX335593,OX335594,OX335595,OX335596,OX335597,OX335598,OX335599,OX335600,OX335601,OX335602,OX335603,OX335604,OX335605,OX335606,OX335607,OX335608,OX335609,OX335610,OX335611,OX335612,OX335613,OX335614,OX335615,OX335616,OX335617,OX335618,OX335619,OX335620,OX335621,OX335622,OX335623,OX335624,OX335625,OX335626,OX335627,OX335628,OX335629,OX335630,OX335631,OX335632,OX335633,OX335634,OX335635,OX335636,OX335637,OX335638,OX335639,OX335640,OX335641,OX335642,OX335643,OX335644,OX335645,OX335646,OX335647,OX335648,OX335649,OX335650,OX335651,OX335652,OX335653,OX335654,OX335655,OX335656,OX335657,OX335658,OX335659,OX335660,OX335661,OX335662,OX335663,OX335664,OX335665,OX335666,OX335667,OX335668,OX335669,OX335670,OX335671,OX335672,OX335673,OX335674,OX335675,OX335676,OX335677,OX335678,OX335679,OX335680,OX335681,OX335682,OX335683,OX335684,OX335685,OX335686,OX335687,OX335688,OX335689,OX335690,OX335691,OX335692,OX335693,OX335694,OX335695,OX335696,OX335697,OX335698,OX335699,OX335700,OX335701,OX335702,OX335703,OX335704,OX335705,OX335706,OX335707,OX335708,OX335709,OX335710,OX335711,OX335712,OX335713,OX335714,OX335715,OX335716,OX335717,OX335718,OX335719,OX335720,OX335721,OX335722,OX335723,OX335724,OX335725,OX335726,OX335727,OX335728,OX335729,OX335730,OX335731,OX335732,OX335733,OX335734,OX335735,OX335736,OX335737,OX335738,OX335739,OX335740,OX335741,OX335742,OX335743,OX335744,OX335745,OX335746,OX335747,OX335748,OX335749,OX335750,OX335751,OX335752,OX335753,OX335754,OX335755,OX335756,OX335757,OX335758,OX335759,OX335760,OX335761,OX335762,OX335763,OX335764,OX335765,OX335766,OX335767,OX335768,OX335769,OX335770,OX335771,OX335772,OX335773,OX335774,OX335775,OX335776,OX335777,OX335778,OX335779,OX335780,OX335781,OX335782,OX335783,OX335784,OX335785,OX335786,OX335787,OX335788,OX335789,OX335790,OX335791,OX335792,OX335793,OX335794,OX335795,OX335796,OX335797,OX335798,OX335799,OX335800,OX335801,OX335802,OX335803,OX335804,OX335805,OX335806,OX335807,OX335808,OX335809,OX335810,OX335811,OX335812,OX335813,OX335814,OX335815,OX335816,OX335817,OX335818,OX335819,OX335820,OX335821,OX335822,OX335823,OX335824,OX335825,OX335826,OX335827,OX335828,OX335829,OX335830,OX335831,OX335832,OX335833,OX335834,OX335835,OX335836,OX335837,OX335838,OX335839,OX335840,OX335841,OX335842,OX335843,OX335844,OX335845,OX335846,OX335847,OX335848,OX335849,OX335850,OX335851,OX335852,OX335853,OX335854,OX335855,OX335856,OX335857,OX335858,OX335859,OX335860,OX335861,OX335862,OX335863,OX335864,OX335865,OX335866,OX335867,OX335868,OX335869,OX335870,OX335871,OX335872,OX335873,OX335874,OX335875,OX335876,OX335877,OX335878,OX335879,OX335880,OX335881,OX335882,OX335883,OX335884,OX335885,OX335886,OX335887,OX335888,OX335889,OX335890,OX335891,OX335892,OX335893,OX335894,OX335895,OX335896,OX335897,OX335898,OX335899,OX335900,OX335901,OX335902,OX335903,OX335904,OX335905,OX335906,OX335907,OX335908,OX335909,OX335910,OX335911,OX335912,OX335913,OX335914,OX335915,OX335916,OX335917,OX335918,OX335919,OX335920,OX335921,OX335922,OX335923,OX335924,OX335925,OX335926,OX335927,OX335928,OX335929,OX335930,OX335931,OX335932,OX335933,OX335934,OX335935,OX335936,OX335937,OX335938,OX335939,OX335940,OX335941,OX335942,OX335943,OX335944,OX335945,OX335946,OX335947,OX335948,OX335949,OX335950,OX335951,OX335952,OX335953,OX335954,OX335955,OX335956,OX335957,OX335958,OX335959,OX335960,OX335961,OX335962,OX335963,OX335964,OX335965,OX335966,OX335967,OX335968,OX335969,OX335970,OX335971,OX335972,OX335973,OX335974,OX335975,OX335976,OX335977,OX335978,OX335979,OX335980,OX335981,OX335982,OX335983,OX335984,OX335985,OX335986,OX335987,OX335988,OX335989,OX335990,OX335991,OX335992,OX335993,OX335994,OX335995,OX335996,OX335997,OX335998,OX335999,OX336000,OX336001,OX336002,OX336003,OX336004,OX336005,OX336006,OX336007,OX336008,OX336009,OX336010,OX336011,OX336012,OX336013,OX336014,OX336015,OX336016,OX336017,OX336018,OX336019,OX336020,OX336021,OX336022,OX336023,OX336024,OX336025,OX336026,OX336027,OX336028,OX336029,OX336030,OX336031,OX336032,OX336033,OX336034,OX336035,OX336036,OX336037,OX336038,OX336039,OX336040,OX336041,OX336042,OX336043,OX336044,OX336045,OX336046,OX336047,OX336048,OX336049,OX336050,OX336051,OX336052,OX336053,OX336054,OX336055,OX336056,OX336057,OX336058,OX336059,OX336060,OX336061,OX336062,OX336063,OX336064,OX336065,OX336066,OX336067,OX336068,OX336069,OX336070,OX336071,OX336072,OX336073,OX336074,OX336075,OX336076,OX336077,OX336078,OX336079,OX336080,OX336081,OX336082,OX336083,OX336084,OX336085,OX336086,OX336087,OX336088,OX336089,OX336090,OX336091,OX336092,OX336093,OX336094,OX336095,OX336096,OX336097,OX336098,OX336099,OX336100,OX336101,OX336102,OX336103,OX336104,OX336105,OX336106,OX336107,OX336108,OX336109,OX336110,OX336111,OX336112,OX336113,OX336114,OX336115,OX336116,OX336117,OX336118,OX336119,OX336120,OX336121,OX336122,OX336123,OX336124,OX336125,OX336126,OX336127,OX336128,OX336129,OX336130,OX336131,OX336132,OX336133,OX336134,OX336135,OX336136,OX336137,OX336138,OX336139,OX336140,OX336141,OX336142,OX336143,OX336144,OX336145,OX336146,OX336147,OX336148,OX336149,OX336150,OX336151,OX336152,OX336153,OX336154,OX336155,OX336156,OX336157,OX336158,OX336159,OX336160,OX336161,OX336162,OX336163,OX336164,OX336165,OX336166,OX336167,OX336168,OX336169,OX336170,OX336171,OX336172,OX336173,OX336174,OX336175,OX336176,OX336177,OX336178,OX336179,OX336180,OX336181,OX336182,OX336183,OX336184,OX336185,OX336186,OX336187,OX336188,OX336189,OX336190,OX336191,OX336192,OX336193,OX336194,OX336195,OX336196,OX336197,OX336198,OX336199,OX336200,OX336201,OX336202,OX336203,OX336204,OX336205,OX336206,OX336207,OX336208,OX336209,OX336210,OX336211,OX336212,OX336213,OX336214,OX336215,OX336216,OX336217,OX336218,OX336219,OX336220,OX336221,OX336222,OX336223,OX336224,OX336225,OX336226,OX336227,OX336228,OX336229,OX336230,OX336231,OX336232,OX336233,OX336234,OX336235,OX336236,OX336237,OX336238,OX336239,OX336240,OX336241,OX336242,OX336243,OX336244,OX336245,OX336246,OX336247,OX336248,OX336249,OX336250,OX336251,OX336252,OX336253,OX336254,OX336255,OX336256,OX336257,OX336258,OX336259,OX336260,OX336261,OX336262,OX336263,OX336264,OX336265,OX336266,OX336267,OX336268,OX336269,OX336270,OX336271,OX336272,OX336273,OX336274,OX336275,OX336276,OX336277,OX336278,OX336279,OX336280,OX336281,OX336282,OX336283,OX336284,OX336285,OX336286,OX336287,OX336288,OX336289,OX336290,OX336291,OX336292,OX336293,OX336294,OX336295,OX336296,OX336297,OX336298,OX336299,OX336300,OX336301,OX336302,OX336303,OX336304,OX336305,OX336306,OX336307,OX336308,OX336309,OX336310,OX336311,OX336312,OX336313,OX336314,OX336315,OX336316,OX336317,OX336318,OX336319,OX336320,OX336321,OX336322,OX336323,OX336324,OX336325,OX336326,OX336327,OX336328,OX336329,OX336330,OX336331,OX336332,OX336333,OX336334,OX336335,OX336336,OX336337,OX336338,OX336339,OX336340,OX336341,OX336342,OX336343,OX336344,OX336345,OX336346,OX336347,OX336348,OX336349,OX336350,OX336351,OX336352,OX336353,OX336354,OX336355,OX336356,OX336357,OX336358,OX336359,OX336360,OX336361,OX336362,OX336363,OX336364,OX336365,OX336366,OX336367,OX336368,OX336369,OX336370,OX336371,OX336372,OX336373,OX336374,OX336375,OX336376,OX336377,OX336378,OX336379,OX336380,OX336381,OX336382,OX336383,OX336384,OX336385,OX336386,OX336387,OX336388,OX336389,OX336390,OX336391,OX336392,OX336393,OX336394,OX336395,OX336396,OX336397,OX336398,OX336399,OX336400,OX336401,OX336402,OX336403,OX336404,OX336405,OX336406,OX336407,OX336408,OX336409,OX336410,OX336411,OX336412,OX336413,OX336414,OX336415,OX336416,OX336417,OX336418,OX336419,OX336420,OX336421,OX336422,OX336423,OX336424,OX336425,OX336426,OX336427,OX336428,OX336429,OX336430,OX336431,OX336432,OX336433,OX336434,OX336435,OX336436,OX336437,OX336438,OX336439,OX336440,OX336441,OX336442,OX336443,OX336444,OX336445,OX336446,OX336447,OX336448,OX336449,OX336450,OX336451,OX336452,OX336453,OX336454,OX336455,OX336456,OX336457,OX336458,OX336459,OX336460,OX336461,OX336462,OX336463,OX336464,OX336465,OX336466,OX336467,OX336468,OX336469,OX336470,OX336471,OX336472,OX336473,OX336474,OX336475,OX336476,OX336477,OX336478,OX336479,OX336480,OX336481,OX336482,OX336483,OX336484,OX336485,OX336486,OX336487,OX336488,OX336489,OX336490,OX336491,OX336492,OX336493,OX336494,OX336495,OX336496,OX336497,OX336498,OX336499,OX336500,OX336501,OX336502,OX336503,OX336504,OX336505,OX336506,OX336507,OX336508,OX336509,OX336510,OX336511,OX336512,OX336513,OX336514,OX336515,OX336516,OX336517,OX336518,OX336519,OX336520,OX336521,OX336522,OX336523,OX336524,OX336525,OX336526,OX336527,OX336528,OX336529,OX336530,OX336531,OX33653



|          |                                                                                                                                                                                                                                                                                                                                                                                                                                                                                                                                                                                                                                              |
|----------|----------------------------------------------------------------------------------------------------------------------------------------------------------------------------------------------------------------------------------------------------------------------------------------------------------------------------------------------------------------------------------------------------------------------------------------------------------------------------------------------------------------------------------------------------------------------------------------------------------------------------------------------|
| VC_962_0 | JN882267,OM621814                                                                                                                                                                                                                                                                                                                                                                                                                                                                                                                                                                                                                            |
| VC_963_0 | KY965934,MG550110,MG550111,MG550113                                                                                                                                                                                                                                                                                                                                                                                                                                                                                                                                                                                                          |
| VC_965_0 | MG596800,OM982619                                                                                                                                                                                                                                                                                                                                                                                                                                                                                                                                                                                                                            |
| VC_966_0 | MK608336,OK499995,OL539452                                                                                                                                                                                                                                                                                                                                                                                                                                                                                                                                                                                                                   |
| VC_967_0 | QJ309827,KT932700,LT630001,MK721183,MK721184,MK721185,MK721188,MK721193,MK721195,MK721196,MK721197,MK721198,MT747434,MT757399,MW623430,ON352054                                                                                                                                                                                                                                                                                                                                                                                                                                                                                              |
| VC_968_0 | KT945995,MK360025,OL799259,ON113181                                                                                                                                                                                                                                                                                                                                                                                                                                                                                                                                                                                                          |
| VC_969_0 | QJ312117,MK637516,MT234341                                                                                                                                                                                                                                                                                                                                                                                                                                                                                                                                                                                                                   |
| VC_97_0  | AY212251,KJ528544,LC628082,LC644557,ON637248                                                                                                                                                                                                                                                                                                                                                                                                                                                                                                                                                                                                 |
| VC_970_0 | MN988470,MN988484,MN988495,MN988531,MN988537,MN988544,MN988546,MN988557,MW980069                                                                                                                                                                                                                                                                                                                                                                                                                                                                                                                                                             |
| VC_971_0 | KP280063,KY883654,KY883655                                                                                                                                                                                                                                                                                                                                                                                                                                                                                                                                                                                                                   |
| VC_971_1 | QJ340389,LC487410,MG649966,MG649967,MK796244,MK895508,MK907780,MN954399,MN958086,MN966730,MN966731,MN966732,MT448616,MT448617,MT459144,MT460514,MT460515,MT460516,MT460517,MT460518,MW344054,MW344055,MW344056,MW398869                                                                                                                                                                                                                                                                                                                                                                                                                      |
| VC_971_2 | KT345706                                                                                                                                                                                                                                                                                                                                                                                                                                                                                                                                                                                                                                     |
| VC_972_0 | MH645904,MH925094,MN871505,MN871510,MN871511,MT442039                                                                                                                                                                                                                                                                                                                                                                                                                                                                                                                                                                                        |
| VC_973_0 | MW824415,MW824416,MW824419,MW824422,MW824423,MW824424,MW824425,MW824426                                                                                                                                                                                                                                                                                                                                                                                                                                                                                                                                                                      |
| VC_974_0 | QJ823122,QJ823123                                                                                                                                                                                                                                                                                                                                                                                                                                                                                                                                                                                                                            |
| VC_975_0 | KP876465,KP876466,KT989433,KU189325,KU530220,KY365739,MF975638,MH178381,MH178382,MK686071,ON526979                                                                                                                                                                                                                                                                                                                                                                                                                                                                                                                                           |
| VC_976_0 | ON529850,ON529857                                                                                                                                                                                                                                                                                                                                                                                                                                                                                                                                                                                                                            |
| VC_976_1 | ON529851,ON529852,ON529853,ON529855,ON529860                                                                                                                                                                                                                                                                                                                                                                                                                                                                                                                                                                                                 |
| VC_976_2 | JX100810,MH588545                                                                                                                                                                                                                                                                                                                                                                                                                                                                                                                                                                                                                            |
| VC_976_3 | JX100814,MH588544                                                                                                                                                                                                                                                                                                                                                                                                                                                                                                                                                                                                                            |
| VC_976_4 | JX100809,JX100811,JX100812,JX100813,JX163858,KY555142,KY555143,KY555144,KY555145,KY555146,KY555147                                                                                                                                                                                                                                                                                                                                                                                                                                                                                                                                           |
| VC_976_5 | ON529858                                                                                                                                                                                                                                                                                                                                                                                                                                                                                                                                                                                                                                     |
| VC_977_0 | KT870145,MH015255                                                                                                                                                                                                                                                                                                                                                                                                                                                                                                                                                                                                                            |
| VC_977_1 | MN602268,MT270409                                                                                                                                                                                                                                                                                                                                                                                                                                                                                                                                                                                                                            |
| VC_977_2 | OP186293                                                                                                                                                                                                                                                                                                                                                                                                                                                                                                                                                                                                                                     |
| VC_978_0 | KY629563,OL955261                                                                                                                                                                                                                                                                                                                                                                                                                                                                                                                                                                                                                            |
| VC_978_1 | OL963731                                                                                                                                                                                                                                                                                                                                                                                                                                                                                                                                                                                                                                     |
| VC_980_0 | JX126919,JX126920,JX442241,KJ094020,KJ094021,MH299806,MN114082,MN114083,MN128593,MN904502                                                                                                                                                                                                                                                                                                                                                                                                                                                                                                                                                    |
| VC_981_0 | JX182369,ON526970,ON526974                                                                                                                                                                                                                                                                                                                                                                                                                                                                                                                                                                                                                   |
| VC_981_1 | JX182370,JX262376,MF766044,MF766045,MF766046,MF766047,MF766048,MG593802,MH001460,MH590601,MH651190,MH669004,MH669016,MK392363,MK392364,MK392365,MK392366,MK460245,MK524524,MN234192,MN234208,MT310863,MT701594,MT701597,MT708548,OK412919                                                                                                                                                                                                                                                                                                                                                                                                    |
| VC_982_0 | JX889246,KC700556,KC700557,KC700558,KT124227,KT124228,KT124229,KT152029,KT184390,KT184391,KT186228,KT186229,KX344445,KX507343,KX507344,KX507345,KX815338,MF541403,MF541404,MF541405,MF541406,MF541407,MF541408,MF541409,MF541410,MG298964,MG757163,MH171093,MH171094,MH171095,MH171096,MH171097,MH171098,MH248947,MK433270,MK433271,MK433276,MK433278,MN096373,MN096375,MN096379,MN096381,MN204498,MN284899,MN586009,MT701598,MT711978,MT711979,MW365951,MW365953,MW435856,MZ648032,MZ648039,MZ648040,MZ820088,MZ820091,MZ820092,OL455891,OL455894,OL742563,ON208832,ON526985                                                                |
| VC_984_0 | JX290549,KR604693,KT240186,KX278418,KX278419,KY953156,LC063634,LC375533,MH807811,MH807814,MH807816,MH807818,MH807819,MK095192,MK095193,MK095194,MK095195,MK095196,MK095197,MK095198,MK095199,MK095200,MK095201,MK095202,MK095203,MK095204,MK095205,MK095206,MK095207,MK095208,MK095209,MK095210,MK095211,MN270887,MN270888,MN271656,MN812690,MN812692                                                                                                                                                                                                                                                                                        |
| VC_987_0 | JX483874,JX483875,JX483879,JX483880,MF403005,MF403006,MN988466,MN988488,MN988492,MN988493,MN988512,MN988513,MN988514,MN988528,MN988529,MT708544,MT708546,MW960034,MW980062,MW980065,MW980074,MZ462995                                                                                                                                                                                                                                                                                                                                                                                                                                        |
| VC_988_0 | MF278336,MW043865                                                                                                                                                                                                                                                                                                                                                                                                                                                                                                                                                                                                                            |
| VC_989_0 | KY065149,MT227925                                                                                                                                                                                                                                                                                                                                                                                                                                                                                                                                                                                                                            |
| VC_99_0  | AB647160,AB731695,JF734911,JQ617284,KX119174,KX119175,KX119176,KX119177,KX119182,KX119188,KX119189,KX119190,KX119191,KX119192,KX119193,KX119194,KX119195,KX119196,KX119197,KX119198,KX119199,KX119200,KX119201,KX119202,KX119203,KX119204,KX119205,KX119206,MW247144,MW247145,MW247147,OM515228                                                                                                                                                                                                                                                                                                                                              |
| VC_990_0 | KP614509,MN988552,MT778840                                                                                                                                                                                                                                                                                                                                                                                                                                                                                                                                                                                                                   |
| VC_991_0 | KC292024,KC292028                                                                                                                                                                                                                                                                                                                                                                                                                                                                                                                                                                                                                            |
| VC_992_0 | KP087954,MH572347,MH572348,MH572349,MH572405,MH572418,MH572455,MH572515                                                                                                                                                                                                                                                                                                                                                                                                                                                                                                                                                                      |
| VC_994_0 | MK249135                                                                                                                                                                                                                                                                                                                                                                                                                                                                                                                                                                                                                                     |
| VC_995_0 | KC131022,KM589502,KM589511,KT264813,KT264814,KT264815,MG945202,MG945465,MG945477,MG945663,MG945838,MG945843,MH572283,MH572284,MH572285,MH572286,MH572291,MH572292,MH572293,MH572382,MH572383,MH572423,MH572424,MH572427,MH572428,MH572466,MH572495,MH572504,MH992156,MH992161,MH992184,MH992185,MH992213,MK249141,MK249147,MK249165,MK249185,MK249190,MK249197,MK249201,MK249202,MK249203,MK249211,MK249213,MK249221,MK496825,MN862333,MN862335,MN862341,MW202412,MW202414,MW202466,MW202471,MW202549,MW202587,MW202847,MW202853,MW202883,MZ364228,MZ364233,MZ364240,MZ364243,MZ364256,MZ364258,MZ364259,MZ364267,MZ364274,OL617029,OM523002 |
| VC_996_0 | MN862339,MN862340                                                                                                                                                                                                                                                                                                                                                                                                                                                                                                                                                                                                                            |
| VC_997_0 | MH992169                                                                                                                                                                                                                                                                                                                                                                                                                                                                                                                                                                                                                                     |
| VC_998_0 | MH572299,MH572425                                                                                                                                                                                                                                                                                                                                                                                                                                                                                                                                                                                                                            |
| VC_999_0 | MH572426,MK249189                                                                                                                                                                                                                                                                                                                                                                                                                                                                                                                                                                                                                            |



**Table S8-4. VCs\_ME-vOTUs\_ref**

| VC        | Members                                                                                                                                                                                                                                                                                                                                                                                                                                                                                                 |
|-----------|---------------------------------------------------------------------------------------------------------------------------------------------------------------------------------------------------------------------------------------------------------------------------------------------------------------------------------------------------------------------------------------------------------------------------------------------------------------------------------------------------------|
| VC_1009_0 | ON721384,ON721385,S7-wms_244866                                                                                                                                                                                                                                                                                                                                                                                                                                                                         |
| VC_1010_0 | MN732896,S11-wms_330479                                                                                                                                                                                                                                                                                                                                                                                                                                                                                 |
| VC_1109_0 | KR816341,S7-wms-combined_235165                                                                                                                                                                                                                                                                                                                                                                                                                                                                         |
| VC_1243_0 | MG883709,MG945260,MG945282,MG945390,MG945396,MG945452,MG945485,MG945511,MG945515,MG945618,MG945634,MG945641,MG945647,MG945743,MH572525,MH572526,MK496694,MK496775,MK765561,MK765563,MK765564,MK765568,MK765569,MK765594,MK765638,MN311493,MT135347,MT135352,MT135355,MT135366,MT135381,MT135382,MT135387,MT135444,MW202703,MW202824,MZ089786,MZ089791,MZ089795,MZ089806,OL617028,OM869549,OM869559,OM869560,OM869562,OM869569,OM869650,OP549868,OP549871,OP549874,S11-wms-combined_357373,S9-wms_128232 |
| VC_1276_0 | MG945488,MG945572,MZ089802,MZ089808,MZ089809,OP549867,S17-wms_254872                                                                                                                                                                                                                                                                                                                                                                                                                                    |
| VC_1423_0 | MT135285,MT135286,MT135289,MT135297,MT135302,MT135308,MT135314,S9-wms_104169                                                                                                                                                                                                                                                                                                                                                                                                                            |
| VC_181_0  | JF832915,KP137440,MK388859,S11-wms-combined_19031,S11-wms-combined_268967                                                                                                                                                                                                                                                                                                                                                                                                                               |
| VC_19_0   | CP000315,S5-wms-combined_83412                                                                                                                                                                                                                                                                                                                                                                                                                                                                          |
| VC_250_0  | AY539836,CP000622,ON170188,S9-wms-combined_64277                                                                                                                                                                                                                                                                                                                                                                                                                                                        |
| VC_255_0  | FJ965538,KX879643,KY705252,KY705253,KY705254,KY705255,MH892355,MH892367,MH892373,MH973663,MK202159,MK202160,MK202161                                                                                                                                                                                                                                                                                                                                                                                    |
| VC_255_1  | S9-wms-combined_20485                                                                                                                                                                                                                                                                                                                                                                                                                                                                                   |
| VC_427_0  | JF974295,MW202455,S11-wms-combined_324053                                                                                                                                                                                                                                                                                                                                                                                                                                                               |
| VC_540_0  | KC139518,KT287080,MF158036,MF158037,MH424444,MK214385,MK479295,MN070121,MN393079,MT012729,MW725301,MZ004649,MZ501269,ON720976,S17-wms_266511                                                                                                                                                                                                                                                                                                                                                            |
| VC_822_0  | LT600745,S7-wms-combined_225260                                                                                                                                                                                                                                                                                                                                                                                                                                                                         |



**Table S8-5. VCs\_ME-vOTUs\_only**

| VC        | Members                                       |
|-----------|-----------------------------------------------|
| VC_1491_0 | S1-wms-combined_185336,S1-wms-combined_40115  |
| VC_1499_0 | S5-wms-combined_66017,S5-wms_210460           |
| VC_798_0  | S1-wms-combined_307323,S7-wms-combined_147158 |
| VC_798_1  | S1-wms-combined_85225                         |
| VC_798_2  | S17-wms-combined_186314                       |
| VC_914_0  | S5-wms_67169                                  |



Table S8-6. VCs\_SHHC\_vOTUs\_ref

| VC        | Members                                                                                       |
|-----------|-----------------------------------------------------------------------------------------------|
| VC_1008_0 | MT635598,MT806185,MT806186,S4-wms_141607                                                      |
| VC_1420_0 | MT121960,MT121964,S12-wms_401372,S2-wms-combined_197577,S2-wms_128831                         |
| VC_1422_0 | MT135284,S2-wms-combined_132966                                                               |
| VC_744_0  | DQ123818,MK016490,MK016500,MN988551,MZ333134,MZ333136,ON381767,ON724010,OV696617,S2-wms_79304 |



**Table S8-7. VCs\_SHHC-vOTUs\_only**

| VC        | Members                                        |
|-----------|------------------------------------------------|
| VC_1076_0 | S12-wms-combined_376326,S8-wms-combined_72911  |
| VC_1238_0 | S12-wms-combined_147628,S12-wms-combined_41160 |
| VC_1489_0 | S12-wms-combined_157167                        |
| VC_1501_0 | S8-wms-combined_276204,S8-wms_57121            |
| VC_1511_0 | S12-wms_15700,S8-wms-combined_226076           |
| VC_674_0  | S8-wms_111056                                  |



**Table S8-8. VCs\_shared\_vOTUs\_ref**

| VC        | Members                                                                                                                                                                                                                                                                                                                                                                                            |
|-----------|----------------------------------------------------------------------------------------------------------------------------------------------------------------------------------------------------------------------------------------------------------------------------------------------------------------------------------------------------------------------------------------------------|
| VC_1235_0 | MG711460,S1-wms_4277,S11-wms-combined_283220,S11-wms_3116,S12-wms-combined_299872,S12-wms_193565,S17-wms-combined_175924,S17-wms-combined_193958,S2-wms-combined_165833,S7-wms_113137,S7-wms_200936,S8-wms_30498                                                                                                                                                                                   |
| VC_1235_1 | S2-wms-combined_157934                                                                                                                                                                                                                                                                                                                                                                             |
| VC_1477_0 | OP549880,S4-wms_161443,S7-wms_157264                                                                                                                                                                                                                                                                                                                                                               |
| VC_417_0  | KC237729,MW478289,MZ503613,S2-wms_130687,S5-wms_49310                                                                                                                                                                                                                                                                                                                                              |
| VC_418_0  | LR596902,S1-wms-combined_224578,S2-wms-combined_246480,S2-wms_140933,S4-wms-combined_64632,S4-wms_62635                                                                                                                                                                                                                                                                                            |
| VC_5_0    | AB374228,AF125163,AY027935,BHU24159,DQ114220,DQ674738,HG803181,HQ110083,KF361475,KT887559,KU504502,KX058879,KX774374,KY045851,LR597637,LR597638,LR597640,LR597649,MG592573,MK972712,MK972713,MK972714,MN563793,MT662115,OM095401,OP484843,S1-wms-combined_159544,S11-wms-combined_154845,S5-wms-combined_18356,S6-wms-combined_119017                                                              |
| VC_606_0  | MG711465,S11-wms_55610,S2-wms_107329,S8-wms_82880                                                                                                                                                                                                                                                                                                                                                  |
| VC_606_1  | S9-wms-combined_29611                                                                                                                                                                                                                                                                                                                                                                              |
| VC_621_0  | MG711464,S1-wms-combined_23248,S11-wms-combined_140009,S12-wms-combined_345948,S12-wms-combined_71235,S17-wms-combined_90378,S4-wms-combined_42647                                                                                                                                                                                                                                                 |
| VC_626_0  | MFI72979,MK448667,MK448700,MK448720,MK448839,MK448841,MK448843,MK448934,MK448997,MW387018,S1-wms-combined_332236,S11-wms-combined_194205,S12-wms-combined_368462,S12-wms-combined_7174,S12-wms-combined_99704,S17-wms-combined_9864,S2-wms-combined_174241,S2-wms-combined_244564,S5-wms-combined_206050,S5-wms-combined_29272,S8-wms-combined_108917,S8-wms-combined_186054,S9-wms-combined_25007 |
| VC_626_1  | S9-wms-combined_9931                                                                                                                                                                                                                                                                                                                                                                               |
| VC_626_2  | S12-wms-combined_98046                                                                                                                                                                                                                                                                                                                                                                             |
| VC_626_3  | S5-wms-combined_108794                                                                                                                                                                                                                                                                                                                                                                             |
| VC_677_0  | BK010646,S11-wms-combined_195425,S12-wms-combined_250551,S3-wms-combined_73262,S5-wms-combined_59064,S7-wms-combined_43950,S7-wms-combined_5625,S8-wms-combined_97848,S9-wms-combined_31456                                                                                                                                                                                                        |
| VC_707_0  | S1-wms-combined_132934,S11-wms-combined_304239,S12-wms-combined_17617,S12-wms-combined_18287,S17-wms-combined_199440,S6-wms-combined_8508                                                                                                                                                                                                                                                          |
| VC_707_1  | MG711462,S12-wms-combined_129554,S17-wms-combined_127688,S2-wms-combined_180640,S2-wms-combined_85381,S6-wms-combined_117756,S7-wms_159432,S8-wms-combined_200168,S8-wms-combined_217866                                                                                                                                                                                                           |
| VC_707_2  | S12-wms-combined_129799                                                                                                                                                                                                                                                                                                                                                                            |
| VC_707_3  | S11-wms-combined_264050                                                                                                                                                                                                                                                                                                                                                                            |
| VC_710_0  | MG711466,ON470591,S1-wms_296850,S11-wms-combined_74983,S12-wms-combined_156234,S17-wms-combined_260343,S6-wms-combined_126236,S7-wms-combined_134458,S8-wms_152831,S8-wms_48935                                                                                                                                                                                                                    |
| VC_710_1  | S2-wms-combined_137119                                                                                                                                                                                                                                                                                                                                                                             |
| VC_710_2  | S7-wms-combined_157260                                                                                                                                                                                                                                                                                                                                                                             |
| VC_710_3  | S6-wms-combined_118427                                                                                                                                                                                                                                                                                                                                                                             |
| VC_710_4  | S2-wms-combined_13246                                                                                                                                                                                                                                                                                                                                                                              |
| VC_711_0  | MG711467,S1-wms-combined_68998,S7-wms-combined_111004                                                                                                                                                                                                                                                                                                                                              |
| VC_711_1  | S12-wms-combined_323943                                                                                                                                                                                                                                                                                                                                                                            |
| VC_711_2  | S17-wms-combined_2234                                                                                                                                                                                                                                                                                                                                                                              |
| VC_711_3  | S2-wms-combined_140996                                                                                                                                                                                                                                                                                                                                                                             |
| VC_717_0  | LR596903,MG711461,S12-wms-combined_259783,S2-wms-combined_207832,S3-wms_22744,S5-wms-combined_134381,S7-wms_118607                                                                                                                                                                                                                                                                                 |
| VC_717_1  | S17-wms-combined_248321                                                                                                                                                                                                                                                                                                                                                                            |
| VC_734_0  | HQ332138,KU517658,MF595878,S2-wms-combined_101826,S2-wms-combined_248329,S5-wms-combined_7292                                                                                                                                                                                                                                                                                                      |
| VC_804_0  | MG711463,S1-wms-combined_304377                                                                                                                                                                                                                                                                                                                                                                    |
| VC_804_1  | S17-wms-combined_259811,S17-wms-combined_47860                                                                                                                                                                                                                                                                                                                                                     |
| VC_804_2  | S1-wms_212940,S12-wms-combined_107942,S2-wms-combined_62377,S2-wms_248315,S8-wms_127191,S9-wms-combined_26410                                                                                                                                                                                                                                                                                      |
| VC_804_3  | S2-wms-combined_98888                                                                                                                                                                                                                                                                                                                                                                              |
| VC_804_4  | S5-wms-combined_72410                                                                                                                                                                                                                                                                                                                                                                              |
| VC_831_0  | MN929097,OK632025,S1-wms-combined_394574,S4-wms-combined_14411,S6-wms_54578                                                                                                                                                                                                                                                                                                                        |
| VC_1198_0 | MT006237,S5-wms_94965,S7-wms-combined_189250                                                                                                                                                                                                                                                                                                                                                       |
| VC_1219_0 | MG065691                                                                                                                                                                                                                                                                                                                                                                                           |
| VC_1219_1 | S5-wms-combined_66662                                                                                                                                                                                                                                                                                                                                                                              |
| VC_1221_0 | MW660583                                                                                                                                                                                                                                                                                                                                                                                           |
| VC_1221_1 | S7-wms-combined_62119                                                                                                                                                                                                                                                                                                                                                                              |
| VC_675_0  | MT774393,S7-wms_244425                                                                                                                                                                                                                                                                                                                                                                             |
| VC_502_0  | S2-wms_128962,S6-wms_138342                                                                                                                                                                                                                                                                                                                                                                        |
| VC_502_1  | MT774375,MT774376,MT774379,MT774380,MT774382,S4-wms_73990                                                                                                                                                                                                                                                                                                                                          |
| VC_502_2  | MT774401                                                                                                                                                                                                                                                                                                                                                                                           |
| VC_502_3  | MT774399,MT774403                                                                                                                                                                                                                                                                                                                                                                                  |
| VC_502_4  | MT774395,MT774397,MT774398                                                                                                                                                                                                                                                                                                                                                                         |
| VC_502_5  | MT774396,MT774405                                                                                                                                                                                                                                                                                                                                                                                  |
| VC_502_6  | MT774404,MT774407                                                                                                                                                                                                                                                                                                                                                                                  |
| VC_502_7  | MT774400                                                                                                                                                                                                                                                                                                                                                                                           |
| VC_852_0  | GQ141189,S4-wms-combined_17284                                                                                                                                                                                                                                                                                                                                                                     |



**Table S8-9. VCs\_shared\_vOTUs\_only**

| VC        | Members                                                                                                                                                                                                                                  |
|-----------|------------------------------------------------------------------------------------------------------------------------------------------------------------------------------------------------------------------------------------------|
| VC_1209_0 | S1-wms-combined_41369,S1-wms_130214,S8-wms-combined_276211                                                                                                                                                                               |
| VC_1209_1 | S12-wms-combined_23517                                                                                                                                                                                                                   |
| VC_1209_2 | S11-wms-combined_3507                                                                                                                                                                                                                    |
| VC_1239_0 | S1-wms_185046,S11-wms_303398,S12-wms-combined_334806,S7-wms-combined_40779,S8-wms-combined_134098,S8-wms-combined_25607                                                                                                                  |
| VC_1397_0 | S11-wms-combined_73204,S12-wms-combined_320727                                                                                                                                                                                           |
| VC_1435_0 | S17-wms-combined_16309,S17-wms_124308,S2-wms_156439,S7-wms-combined_185016,S7-wms-combined_90393,S7-wms-combined_90728,S7-wms_123954,S9-wms-combined_33229,S9-wms-combined_33230                                                         |
| VC_1435_1 | S6-wms-combined_82597                                                                                                                                                                                                                    |
| VC_1436_0 | S12-wms-combined_351847,S12-wms_383851,S2-wms-combined_58121,S7-wms-combined_239784                                                                                                                                                      |
| VC_1456_0 | S11-wms-combined_125176,S12-wms_386692,S6-wms-combined_91039,S7-wms-combined_14267                                                                                                                                                       |
| VC_1473_0 | S1-wms_244836,S2-wms-combined_229529,S9-wms-combined_37587                                                                                                                                                                               |
| VC_1479_0 | S12-wms-combined_51076,S5-wms-combined_78434                                                                                                                                                                                             |
| VC_1481_0 | S1-wms-combined_120533,S1-wms-combined_331896,S12-wms-combined_393703,S17-wms-combined_126600,S2-wms-combined_181095,S5-wms_52566,S8-wms-combined_234473,S8-wms-combined_264711,S9-wms-combined_56773                                    |
| VC_1482_0 | S17-wms-combined_30308,S4-wms-combined_143879                                                                                                                                                                                            |
| VC_1483_0 | S7-wms-combined_169375                                                                                                                                                                                                                   |
| VC_1483_1 | S8-wms-combined_40666                                                                                                                                                                                                                    |
| VC_1484_0 | S1-wms-combined_151708,S1-wms-combined_164485,S12-wms-combined_329242,S17-wms-combined_126774,S17-wms-combined_146850,S17-wms-combined_157468,S2-wms-combined_4685,S2-wms-combined_6605,S6-wms-combined_41246,S7-wms-combined_84688      |
| VC_1487_0 | S1-wms-combined_156637,S12-wms-combined_210942                                                                                                                                                                                           |
| VC_1492_0 | S1-wms_100010,S1-wms_225995,S12-wms-combined_264425,S12-wms-combined_299293,S12-wms_179388,S12-wms_401366,S12-wms_44817                                                                                                                  |
| VC_1495_0 | S17-wms-combined_233761,S2-wms-combined_210822,S4-wms-combined_47565                                                                                                                                                                     |
| VC_1496_0 | S1-wms-combined_313851,S1-wms_313991,S2-wms_110761,S2-wms_23562,S6-wms_137591                                                                                                                                                            |
| VC_1497_0 | S1-wms-combined_331544,S4-wms-combined_51079,S7-wms-combined_136642                                                                                                                                                                      |
| VC_1498_0 | S1-wms-combined_354899,S2-wms-combined_248318                                                                                                                                                                                            |
| VC_1500_0 | S1-wms-combined_394628,S12-wms-combined_401379                                                                                                                                                                                           |
| VC_1502_0 | S11-wms-combined_17029,S12-wms-combined_375343                                                                                                                                                                                           |
| VC_1503_0 | S11-wms-combined_217790,S12-wms-combined_111524,S5-wms-combined_98202                                                                                                                                                                    |
| VC_1504_0 | S11-wms-combined_221310,S8-wms-combined_215102                                                                                                                                                                                           |
| VC_1505_0 | S11-wms-combined_41367,S12-wms-combined_256299,S17-wms-combined_158354,S5-wms_85650                                                                                                                                                      |
| VC_1506_0 | S5-wms-combined_178432,S6-wms-combined_72228                                                                                                                                                                                             |
| VC_1508_0 | S17-wms-combined_203701,S4-wms-combined_57123,S6-wms-combined_135223                                                                                                                                                                     |
| VC_1510_0 | S12-wms-combined_401383,S9-wms-combined_3878                                                                                                                                                                                             |
| VC_1513_0 | S17-wms-combined_225356,S4-wms_107182                                                                                                                                                                                                    |
| VC_212_0  | S12-wms-combined_263377,S6-wms_132588                                                                                                                                                                                                    |
| VC_212_1  | S2-wms-combined_31084,S7-wms-combined_7205                                                                                                                                                                                               |
| VC_271_0  | S11-wms-combined_58538,S11-wms_14390,S2-wms-combined_93845,S8-wms-combined_146562,S8-wms-combined_68780                                                                                                                                  |
| VC_271_1  | S8-wms-combined_225114                                                                                                                                                                                                                   |
| VC_271_2  | S7-wms-combined_238231                                                                                                                                                                                                                   |
| VC_338_0  | S12-wms-combined_120133,S17-wms-combined_130215,S2-wms-combined_55495,S6-wms-combined_118484,S9-wms-combined_36459                                                                                                                       |
| VC_420_0  | S1-wms-combined_72167,S2-wms-combined_227800,S7-wms-combined_28138,S7-wms_127801,S8-wms-combined_140059,S9-wms-combined_71647                                                                                                            |
| VC_535_0  | S4-wms_118690,S9-wms_19025                                                                                                                                                                                                               |
| VC_610_0  | S1-wms-combined_107073,S2-wms-combined_89742,S4-wms-combined_41490,S8-wms-combined_26087                                                                                                                                                 |
| VC_627_0  | S1-wms_170115,S5-wms-combined_73301,S6-wms-combined_113986                                                                                                                                                                               |
| VC_629_0  | S2-wms-combined_196783,S7-wms_80255                                                                                                                                                                                                      |
| VC_650_0  | S1-wms-combined_353757,S11-wms-combined_119215,S11-wms-combined_299954,S11-wms-combined_49632,S17-wms-combined_136622,S17-wms-combined_247494,S17-wms-combined_79709,S2-wms-combined_126134,S5-wms-combined_145067,S7-wms-combined_31068 |
| VC_676_0  | S12-wms-combined_2450,S5-wms-combined_29447                                                                                                                                                                                              |
| VC_676_1  | S11-wms-combined_83571,S6-wms-combined_50721,S7-wms-combined_107679_0,S9-wms-combined_28805                                                                                                                                              |
| VC_715_0  | S1-wms-combined_302166,S11-wms-combined_198512,S12-wms-combined_358010                                                                                                                                                                   |
| VC_732_0  | S12-wms-combined_191570,S2-wms-combined_238929                                                                                                                                                                                           |
| VC_732_1  | S17-wms-combined_95360                                                                                                                                                                                                                   |
| VC_736_0  | S12-wms-combined_168259,S12-wms-combined_282594,S5-wms-combined_52741                                                                                                                                                                    |
| VC_821_0  | S2-wms_53881,S7-wms_239833,S7-wms_53338,S8-wms_244525                                                                                                                                                                                    |
| VC_825_0  | S1-wms-combined_118167,S1-wms-combined_169879,S11-wms-combined_200084,S2-wms-combined_176376,S2-wms_79944,S6-wms-combined_140731,S9-wms-combined_105462                                                                                  |
| VC_825_1  | S11-wms-combined_267993                                                                                                                                                                                                                  |
| VC_825_2  | S5-wms-combined_134743                                                                                                                                                                                                                   |
| VC_832_0  | S2-wms-combined_113619,S9-wms-combined_5526                                                                                                                                                                                              |
| VC_832_1  | S7-wms-combined_3697                                                                                                                                                                                                                     |
| VC_876_0  | S12-wms-combined_245755,S5-wms-combined_26971,S7-wms-combined_139683                                                                                                                                                                     |
| VC_876_1  | S2-wms-combined_116221                                                                                                                                                                                                                   |
| VC_893_0  | S11-wms-combined_46816,S4-wms-combined_113721                                                                                                                                                                                            |
| VC_915_0  | S12-wms-combined_321174,S3-wms_23958,S8-wms-combined_169835                                                                                                                                                                              |
| VC_917_0  | S11-wms-combined_48246,S8-wms-combined_270362                                                                                                                                                                                            |
| VC_917_1  | S5-wms-combined_90315                                                                                                                                                                                                                    |
| VC_918_0  | S11-wms_320555,S12-wms_12658                                                                                                                                                                                                             |
| VC_918_1  | S7-wms-combined_26217                                                                                                                                                                                                                    |
| VC_918_2  | S12-wms-combined_201125                                                                                                                                                                                                                  |
| VC_947_0  | S2-wms-combined_135154,S9-wms-combined_53991,S9-wms-combined_89249                                                                                                                                                                       |
| VC_1014_0 | S11-wms-combined_92114,S17-wms-combined_199746,S7-wms-combined_163980                                                                                                                                                                    |
| VC_1408_0 | S1-wms-combined_197401,S17-wms-combined_162786                                                                                                                                                                                           |
| VC_1408_1 | S1-wms-combined_220022                                                                                                                                                                                                                   |
| VC_1437_0 | S1-wms-combined_263562,S5-wms-combined_207291,S7-wms-combined_104872                                                                                                                                                                     |
| VC_1494_0 | S1-wms-combined_248622,S17-wms-combined_70983                                                                                                                                                                                            |
| VC_1509_0 | S17-wms-combined_179771,S7-wms-combined_72070                                                                                                                                                                                            |
| VC_1512_0 | S17-wms-combined_223748,S9-wms_64472                                                                                                                                                                                                     |
| VC_1514_0 | S5-wms-combined_39793,S7-wms-combined_143218                                                                                                                                                                                             |



|           |                                                                                             |
|-----------|---------------------------------------------------------------------------------------------|
| VC_616_0  | S11-wms-combined_193148,S11-wms-combined_204522                                             |
| VC_679_0  | S1-wms-combined_246923,S1-wms-combined_340558,S1-wms-combined_52643,S11-wms-combined_172889 |
| VC_680_0  | S5-wms-combined_83370,S9-wms-combined_44402                                                 |
| VC_716_0  | S1-wms-combined_360285,S11-wms-combined_84326                                               |
| VC_719_0  | S1-wms_102342                                                                               |
| VC_719_1  | S7-wms-combined_20921                                                                       |
| VC_854_0  | S5-wms-combined_117213,S9-wms-combined_76274                                                |
| VC_1236_0 | S8-wms-combined_134284,S8-wms-combined_211119,S8-wms-combined_49369                         |
| VC_1439_0 | S12-wms-combined_260036,S12-wms-combined_91231,S4-wms_45128                                 |
| VC_148_0  | S2-wms-combined_62519,S8-wms-combined_161181                                                |
| VC_148_1  | S2-wms-combined_218002,S6-wms-combined_119138,S6-wms-combined_32530                         |
| VC_1485_0 | S2-wms-combined_233107                                                                      |
| VC_1507_0 | S12-wms-combined_264845,S12-wms_373775                                                      |
| VC_324_0  | S2-wms-combined_166665,S6-wms-combined_49909                                                |
| VC_651_0  | S2-wms-combined_24549                                                                       |
| VC_678_0  | S12-wms-combined_358797                                                                     |
| VC_738_0  | S2-wms-combined_135139,S8-wms-combined_246185                                               |



Table S8-10. VCs statistics

After curation:

| WMS-VCs:                                                            | Counts |
|---------------------------------------------------------------------|--------|
| Total VCs                                                           | 1515   |
| VCs with "clustered" or "clustered/singleton" vOTUs and Ref genomes | 1301   |
| VCs having reference genomes only                                   | 1181   |
| VCs having no reference genomes at all                              | 81     |
| VCs uniquely having ME-vOTUs with Ref. genomes                      | 13     |
| VCs uniquely having ME-vOTUs only (w/o Ref. genomes)                | 4      |
| VCs uniquely having SHHC-vOTUs with Ref. genomes                    | 4      |
| VCs uniquely having SHHC-vOTUs only (w/o Ref. genomes)              | 6      |
| VCs having shared vOTUs in both samples (with Ref. genomes)         | 22     |
| VCs having shared vOTUs in both samples (w/o Ref. genomes)          | 71     |

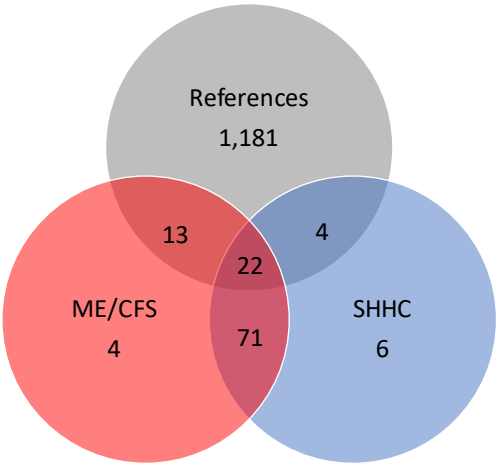

Before curation:

| WMS-VCs:                                                            | Counts |
|---------------------------------------------------------------------|--------|
| Total VCs                                                           | 1515   |
| VCs with "clustered" or "clustered/singleton" vOTUs and Ref genomes | 1301   |
| VCs having reference genomes only                                   | 1181   |
| VCs having no reference genomes at all                              | 81     |
| VCs containing ME-vOTUs with Ref. genomes                           | 17     |
| VCs only having ME-vOTUs (w/o Ref. genomes)                         | 17     |
| VCs containing SHHC-vOTUs with Ref. genomes                         | 6      |
| VCs only having SHHC-vOTUs (w/o Ref. genomes)                       | 15     |
| VCs having both ME and SHHC-vOTUs with Ref. genomes                 | 16     |
| VCs having both ME and SHHC-vOTUs (w/o Ref. genomes)                | 49     |

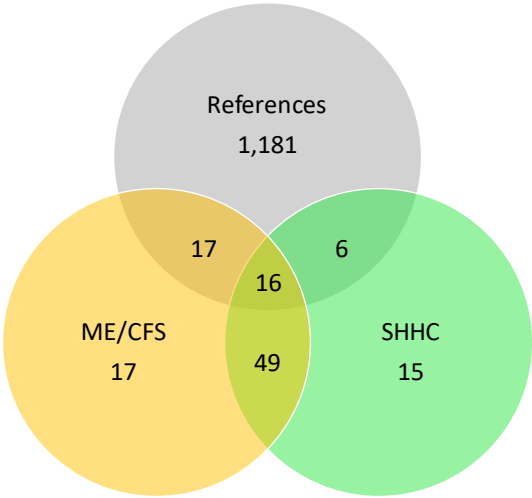
